# Supplementary material for: Polycomb-dependent differential chromatin compartmentalization determines gene coregulation in Arabidopsis
Source: HighWire-hosted journal article supplement (doi:10.1101/gr.273771.120), 2021-06-03
Supplement: Supplemental_Table_S1.xlsx [file Supplemental_Table_S1.xlsx]

## Sheet: Sheet1
	Supplementary Table S1: Summary statistics of HiChIP and Capture HiC Data
		Sequenced reads	Mapped reads	ValidPairs
	HiChIP K27me3 root_rep1	212352865	118018158	49510618
	HiChIP K27me3 shoot_rep1	252934921	149638839	72980337
	HiChIP K27me3 root_rep2	104405162	56097597	24379348
	HiChIP K27me3 shoot_rep2	126100026	71780261	35822072
	HiChIP H3K9ac	159497282	115865730	71066904
	CHiC Col0 root_rep1	61079707	33482459	17541627
	CHiC Col0 shoot_rep1	61983842	38371192	21834248
	CHiC ref6 shoot_rep1	66043862	40662168	29269529
	CHiC clf shoot_rep1	64756351	40359645	29763137
	CHiC Col0 root_rep2	64112876	36332843	18985297
	CHiC Col0 shoot_rep2	67847452	43355423	24630223
	CHiC ref6 shoot_rep2	68745627	43683845	31412705
	CHiC clf shoot_rep2	68002508	43737791	32196390
