# Supplementary material for: Polycomb-dependent differential chromatin compartmentalization determines gene coregulation in Arabidopsis
Source: HighWire-hosted journal article supplement (doi:10.1101/gr.273771.120), 2021-06-03
Supplement: Supplemental_Table_S2.xlsx [file Supplemental_Table_S2.xlsx]

## Sheet: S2
Supplementary Table S2: Short and long range H3K9ac Interactions
chr1	s1	e1	chr2	s2	e2	Distance	Log(Distance)	cc	P-Value_Bias	Q-Value_Bias	bin1_low	bin1_high	bin2_low	bin2_high	sumCC	StrongConn	Gene1	Gene2
Chr3	11736000	11737000	Chr3	13592000	13593000	1857000	6.26881	10	1.49878e-07	0.000121632	11736000	11737000	13592000	13593000	10	1	AT3G29830	NA
Chr3	1951000	1952000	Chr3	3128000	3129000	1178000	6.07115	8	1.37478e-05	0.00691021	1951000	1952000	3128000	3129000	8	1	NA	AT3G10116
Chr3	1956000	1957000	Chr3	3133000	3134000	1178000	6.07115	8	1.34699e-05	0.0067907	1956000	1957000	3133000	3134000	8	1	AT3G06420,AT3G06430	AT3G10130,AT3G10140,AT3G10150,AT3G10160
Chr3	1956000	1957000	Chr3	3128000	3129000	1173000	6.0693	9	1.51317e-06	0.000979554	1954000	1957000	3128000	3130000	23	0.5	AT3G06420,AT3G06430	AT3G10116
Chr3	1958000	1959000	Chr3	3128000	3129000	1171000	6.06856	8	1.25949e-05	0.0064153	1958000	1959000	3128000	3129000	8	1	AT3G06430	AT3G10116
Chr3	1959000	1960000	Chr3	3123000	3124000	1165000	6.06633	13	8.38555e-11	1.18611e-07	1958000	1960000	3123000	3125000	29	0.75	NA	NA
Chr3	1956000	1957000	Chr3	3115000	3116000	1160000	6.06446	11	1.62731e-08	1.58379e-05	1956000	1957000	3114000	3116000	20	1	AT3G06420,AT3G06430	AT3G10110,AT3G10113
Chr3	1936000	1937000	Chr3	3094000	3095000	1159000	6.06408	7	0.000111788	0.0417419	1936000	1937000	3094000	3095000	7	1	AT3G06370,AT3G06380	AT3G10010,AT3G10015,AT3G10020,AT3G10030,AT3G10035,AT3G10040
Chr3	1956000	1957000	Chr3	3112000	3113000	1157000	6.06333	11	1.497e-08	1.46614e-05	1956000	1962000	3107000	3116000	365	0.518519	AT3G06420,AT3G06430	NA
Chr3	1959000	1960000	Chr3	3114000	3115000	1156000	6.06296	37	1.12647e-43	6.78969e-39	1956000	1962000	3107000	3116000	365	0.518519	NA	NA
Chr3	1954000	1955000	Chr3	3109000	3110000	1156000	6.06296	8	1.54994e-05	0.00767062	1954000	1955000	3109000	3110000	8	1	AT3G06420	AT3G10090
Chr3	1956000	1957000	Chr3	3109000	3110000	1154000	6.06221	17	2.42013e-15	6.18178e-12	1956000	1962000	3107000	3116000	365	0.518519	AT3G06420,AT3G06430	AT3G10090
Chr3	1959000	1960000	Chr3	3111000	3112000	1153000	6.06183	20	2.71982e-19	1.10489e-15	1956000	1962000	3107000	3116000	365	0.518519	NA	NA
Chr3	1955000	1956000	Chr3	3106000	3107000	1152000	6.06145	7	0.000101376	0.0385255	1955000	1956000	3106000	3107000	7	1	AT3G06420	AT3G10070
Chr3	1979000	1980000	Chr3	3129000	3130000	1151000	6.06108	8	1.39294e-05	0.00699019	1979000	1980000	3129000	3130000	8	1	AT3G06450	NA
Chr3	1952000	1953000	Chr3	3102000	3103000	1151000	6.06108	7	0.000113929	0.0423969	1952000	1953000	3102000	3103000	7	1	NA	AT3G10050,AT3G10060
Chr3	1972000	1973000	Chr3	3112000	3113000	1141000	6.05729	8	1.19995e-05	0.00615355	1972000	1973000	3112000	3113000	8	1	AT3G06440	NA
Chr3	1975000	1976000	Chr3	3114000	3115000	1140000	6.0569	8	1.42211e-05	0.00711819	1975000	1976000	3114000	3116000	15	1	AT3G06440,AT3G06450	NA
Chr3	1975000	1976000	Chr3	3112000	3113000	1138000	6.05614	8	1.32624e-05	0.00670568	1975000	1976000	3112000	3113000	8	1	AT3G06440,AT3G06450	NA
Chr3	1979000	1980000	Chr3	3115000	3116000	1137000	6.05576	7	0.000110227	0.041285	1979000	1980000	3115000	3116000	7	1	AT3G06450	AT3G10110,AT3G10113
Chr3	1975000	1976000	Chr3	3109000	3110000	1135000	6.055	11	1.59969e-08	1.55906e-05	1973000	1976000	3109000	3111000	32	0.666667	AT3G06440,AT3G06450	AT3G10090
Chr3	1979000	1980000	Chr3	3111000	3112000	1133000	6.05423	8	1.32534e-05	0.006702	1979000	1980000	3111000	3112000	8	1	AT3G06450	NA
Chr3	1975000	1976000	Chr3	3107000	3108000	1133000	6.05423	7	0.000111119	0.0415597	1975000	1976000	3107000	3108000	7	1	AT3G06440,AT3G06450	AT3G10080
Chr3	1979000	1980000	Chr3	3109000	3110000	1131000	6.05346	8	1.43453e-05	0.00717434	1979000	1980000	3109000	3110000	8	1	AT3G06450	AT3G10090
Chr3	1979000	1980000	Chr3	3102000	3103000	1124000	6.05077	7	0.000108743	0.0408403	1979000	1980000	3102000	3103000	7	1	AT3G06450	AT3G10050,AT3G10060
Chr3	14309000	14310000	Chr3	15092000	15093000	784000	5.89432	9	1.83329e-06	0.00116268	14309000	14310000	15092000	15093000	9	1	AT3G42140,AT3G42148,AT3G42150,AT3G42155	AT3G43110,AT3G43120
Chr2	3782000	3783000	Chr2	4416000	4417000	635000	5.80277	7	0.000114644	0.0426098	3782000	3783000	4416000	4417000	7	1	AT2G09990	NA
Chr5	12079000	12080000	Chr5	12558000	12559000	480000	5.68124	8	1.48693e-05	0.00739502	12079000	12080000	12558000	12559000	8	1	AT5G32450,AT5G32460	AT5G33290
Chr2	4006000	4007000	Chr2	4484000	4485000	479000	5.68034	8	1.93388e-05	0.00930424	4006000	4007000	4484000	4485000	8	1	NA	AT2G11270,AT2G11271
Chr1	15651000	15652000	Chr1	16125000	16126000	475000	5.67669	7	0.000112951	0.0420874	15651000	15652000	16125000	16127000	14	1	AT1G41880	AT1G42960
Chr1	13698000	13699000	Chr1	14149000	14150000	452000	5.65514	7	0.000129968	0.0473146	13698000	13699000	14149000	14150000	7	1	AT1G36370	NA
Chr3	13788000	13789000	Chr3	14208000	14209000	421000	5.62428	12	4.90062e-10	6.14284e-07	13788000	13789000	14208000	14209000	12	1	NA	NA
Chr2	4006000	4007000	Chr2	4417000	4418000	412000	5.6149	7	0.000129334	0.0471238	4006000	4007000	4416000	4418000	14	1	NA	NA
Chr2	2590000	2591000	Chr2	2983000	2984000	394000	5.5955	8	1.66503e-05	0.00816948	2590000	2591000	2983000	2984000	8	1	AT2G06530,AT2G06541	AT2G07180,AT2G07190,AT2G07200
Chr2	4416000	4417000	Chr2	4802000	4803000	387000	5.58771	9	2.17799e-06	0.00135858	4416000	4417000	4802000	4803000	9	1	NA	AT2G11890
Chr3	13844000	13845000	Chr3	14214000	14215000	371000	5.56937	7	5.1986e-05	0.0218209	13844000	13845000	14214000	14215000	7	1	NA	NA
Chr5	11024000	11025000	Chr5	11380000	11381000	357000	5.55267	9	1.88577e-06	0.00119277	11024000	11025000	11380000	11381000	9	1	AT5G29000	AT5G30495
Chr3	13591000	13592000	Chr3	13939000	13940000	349000	5.54283	7	0.000122324	0.0449657	13591000	13592000	13939000	13940000	7	1	NA	NA
Chr2	2590000	2591000	Chr2	2931000	2932000	342000	5.53403	13	1.7238e-10	2.31888e-07	2590000	2591000	2931000	2932000	13	1	AT2G06530,AT2G06541	NA
Chr2	3670000	3671000	Chr2	4006000	4007000	337000	5.52763	10	2.23189e-07	0.000174532	3670000	3671000	4006000	4007000	10	1	AT2G09795	NA
Chr2	4416000	4417000	Chr2	4743000	4744000	328000	5.51587	8	1.74289e-05	0.00849469	4416000	4417000	4743000	4744000	8	1	NA	AT2G11810
Chr1	15650000	15651000	Chr1	15976000	15977000	327000	5.51455	9	2.35006e-06	0.00145482	15650000	15651000	15976000	15977000	9	1	AT1G41875	AT1G42540
Chr5	10614000	10615000	Chr5	10940000	10941000	327000	5.51455	7	0.000115666	0.0429116	10614000	10615000	10940000	10941000	7	1	AT5G28610,AT5G28615,AT5G28620	AT5G28919,AT5G28920
Chr2	5214000	5215000	Chr2	5508000	5509000	295000	5.46982	7	0.000115633	0.0429025	5214000	5215000	5508000	5509000	7	1	NA	AT2G13273
Chr4	1611000	1612000	Chr4	1890000	1891000	280000	5.44716	7	0.000138335	0.0499029	1611000	1612000	1890000	1891000	7	1	AT4G03630,AT4G03635	AT4G03965
Chr2	4083000	4084000	Chr2	4347000	4348000	265000	5.42325	9	2.46111e-06	0.00151549	4083000	4084000	4347000	4348000	9	1	AT2G10535,AT2G10537	AT2G11000,AT2G11005
Chr4	1611000	1612000	Chr4	1874000	1875000	264000	5.4216	10	1.79608e-07	0.000143203	1611000	1612000	1874000	1875000	10	1	AT4G03630,AT4G03635	AT4G03935,AT4G03930,AT4G03940
Chr5	13102000	13103000	Chr5	13361000	13362000	260000	5.41497	7	0.000136956	0.0494812	13102000	13103000	13361000	13362000	7	1	AT5G34828	AT5G35100
Chr2	2590000	2591000	Chr2	2843000	2844000	254000	5.40483	14	1.4738e-11	2.33911e-08	2590000	2591000	2843000	2844000	14	1	AT2G06530,AT2G06541	AT2G06925
Chr5	10780000	10781000	Chr5	11025000	11026000	246000	5.39094	7	0.000126408	0.0462307	10780000	10781000	11025000	11026000	7	1	AT5G28720,AT5G28730,AT5G28740	NA
Chr3	12352000	12353000	Chr3	12591000	12592000	240000	5.38021	7	0.000126447	0.0462364	12352000	12353000	12591000	12592000	7	1	AT3G30725,AT3G30730	AT3G30840,AT3G30841,AT3G30842
Chr5	11380000	11381000	Chr5	11612000	11613000	233000	5.36736	9	1.49599e-06	0.000970046	11380000	11381000	11612000	11613000	9	1	AT5G30495	AT5G30490
Chr2	2362000	2363000	Chr2	2590000	2591000	229000	5.35984	10	2.83613e-07	0.000217178	2361000	2363000	2589000	2591000	19	0.5	AT2G06050,AT2G06090	AT2G06530,AT2G06541
Chr2	3780000	3781000	Chr2	4006000	4007000	227000	5.35603	10	3.47477e-07	0.000260486	3780000	3781000	4006000	4007000	10	1	AT2G09970	NA
Chr3	14095000	14096000	Chr3	14321000	14322000	227000	5.35603	9	2.36278e-06	0.00146188	14095000	14096000	14321000	14322000	9	1	AT3G33520	AT3G42170,AT3G42180
Chr2	4083000	4084000	Chr2	4305000	4306000	223000	5.3483	9	3.2871e-06	0.00196256	4083000	4084000	4305000	4306000	9	1	AT2G10535,AT2G10537	AT2G10931
Chr3	14879000	14880000	Chr3	15092000	15093000	214000	5.33041	9	3.49142e-06	0.00207008	14879000	14880000	15092000	15093000	9	1	AT3G42790	AT3G43110,AT3G43120
Chr2	4618000	4619000	Chr2	4802000	4803000	185000	5.26717	8	2.35277e-05	0.0110256	4618000	4619000	4802000	4803000	8	1	AT2G11520	AT2G11890
Chr4	3766000	3767000	Chr4	3940000	3941000	175000	5.24304	9	2.00283e-06	0.00125923	3766000	3767000	3940000	3941000	9	1	AT4G06634	AT4G06701
Chr4	1612000	1613000	Chr4	1779000	1780000	168000	5.22531	7	0.000122873	0.0451097	1612000	1613000	1779000	1780000	7	1	AT4G03635	AT4G03827
Chr3	22473000	22474000	Chr3	22635000	22636000	163000	5.21219	9	4.71606e-06	0.0027072	22473000	22474000	22635000	22636000	9	1	AT3G60820	AT3G61150,AT3G61160,AT3G61170
Chr1	15977000	15978000	Chr1	16137000	16138000	161000	5.20683	7	0.000128721	0.0469445	15977000	15978000	16137000	16138000	7	1	AT1G42550	AT1G42980,AT1G42990
Chr1	15974000	15975000	Chr1	16127000	16128000	154000	5.18752	7	0.000130141	0.0473664	15974000	15975000	16127000	16128000	7	1	AT1G42540	AT1G42960,AT1G42970
Chr3	22366000	22367000	Chr3	22516000	22517000	151000	5.17898	8	1.87585e-05	0.00905701	22366000	22367000	22516000	22517000	8	1	NA	NA
Chr1	15978000	15979000	Chr1	16126000	16127000	149000	5.17319	7	0.000134478	0.0487306	15978000	15979000	16126000	16127000	7	1	AT1G42550,AT1G42560	AT1G42960
Chr4	1887000	1888000	Chr4	2035000	2036000	149000	5.17319	9	3.8681e-06	0.00226919	1887000	1888000	2035000	2036000	9	1	AT4G03960	AT4G04220,AT4G04221,AT4G04223
Chr1	14030000	14031000	Chr1	14169000	14170000	140000	5.14613	8	2.49359e-05	0.0115905	14030000	14031000	14169000	14170000	8	1	AT1G36990,AT1G36992,AT1G37000,AT1G37007,AT1G37010	AT1G37140
Chr1	14149000	14150000	Chr1	14285000	14286000	137000	5.13672	8	3.47498e-05	0.0154378	14149000	14150000	14285000	14286000	8	1	NA	NA
Chr2	4006000	4007000	Chr2	4142000	4143000	137000	5.13672	12	3.79068e-09	4.12164e-06	4006000	4007000	4141000	4143000	20	1	NA	AT2G10606,AT2G10608
Chr3	12456000	12457000	Chr3	12591000	12592000	136000	5.13354	8	2.21908e-05	0.0104888	12456000	12457000	12591000	12592000	8	1	AT3G30778	AT3G30840,AT3G30841,AT3G30842
Chr2	4484000	4485000	Chr2	4618000	4619000	135000	5.13033	8	4.13644e-05	0.0179397	4484000	4485000	4618000	4619000	8	1	AT2G11270,AT2G11271	AT2G11520
Chr5	13102000	13103000	Chr5	13233000	13234000	132000	5.12057	11	4.11611e-08	3.7059e-05	13102000	13103000	13233000	13234000	11	1	AT5G34828	AT5G34905,AT5G34908,AT5G34930
Chr4	3766000	3767000	Chr4	3895000	3896000	130000	5.11394	14	2.67639e-11	4.09966e-08	3766000	3767000	3895000	3896000	14	1	AT4G06634	NA
Chr5	13233000	13234000	Chr5	13361000	13362000	129000	5.11059	8	2.85409e-05	0.0130298	13233000	13234000	13361000	13362000	8	1	AT5G34905,AT5G34908,AT5G34930	AT5G35100
Chr1	13900000	13901000	Chr1	14027000	14028000	128000	5.10721	9	3.60134e-06	0.00212805	13900000	13901000	14027000	14028000	9	1	AT1G36730,AT1G36732	AT1G36990
Chr2	2931000	2932000	Chr2	3056000	3057000	126000	5.10037	8	4.03269e-05	0.0175593	2931000	2932000	3056000	3057000	8	1	NA	AT2G07360
Chr2	4618000	4619000	Chr2	4743000	4744000	126000	5.10037	9	3.60851e-06	0.00213158	4618000	4619000	4743000	4744000	9	1	AT2G11520	AT2G11810
Chr4	4071000	4072000	Chr4	4195000	4196000	125000	5.09691	8	1.73893e-05	0.00847807	4071000	4072000	4195000	4196000	8	1	AT4G06744	AT4G07380,AT4G07390
Chr4	4073000	4074000	Chr4	4196000	4197000	124000	5.09342	9	1.45125e-06	0.000943795	4073000	4074000	4195000	4197000	16	1	AT4G06746	AT4G07390
Chr1	14030000	14031000	Chr1	14147000	14148000	118000	5.07188	8	3.20613e-05	0.014403	14030000	14031000	14147000	14148000	8	1	AT1G36990,AT1G36992,AT1G37000,AT1G37007,AT1G37010	AT1G37113
Chr2	3667000	3668000	Chr2	3781000	3782000	115000	5.0607	8	1.93994e-05	0.00932704	3667000	3668000	3781000	3782000	8	1	NA	AT2G09990
Chr1	12239000	12240000	Chr1	12351000	12352000	113000	5.05308	9	6.82281e-06	0.00374223	12239000	12240000	12351000	12352000	9	1	NA	AT1G33970,AT1G33980
Chr2	3670000	3671000	Chr2	3782000	3783000	113000	5.05308	14	4.25448e-11	6.29138e-08	3670000	3673000	3782000	3783000	32	1	AT2G09795	AT2G09990
Chr1	14610000	14611000	Chr1	14721000	14722000	112000	5.04922	37	1.51516e-45	1.18999e-40	14610000	14611000	14721000	14723000	49	1	NA	NA
Chr2	3669000	3670000	Chr2	3780000	3781000	112000	5.04922	9	4.18327e-06	0.00243152	3669000	3670000	3780000	3781000	9	1	NA	AT2G09970
Chr1	13559000	13560000	Chr1	13669000	13670000	111000	5.04532	8	3.16541e-05	0.0142448	13559000	13560000	13669000	13670000	8	1	NA	AT1G36310,AT1G36320
Chr3	12449000	12450000	Chr3	12559000	12560000	111000	5.04532	7	0.000113611	0.0422965	12449000	12450000	12559000	12560000	7	1	AT3G30768,AT3G30769,AT3G30770,AT3G30775	NA
Chr2	3672000	3673000	Chr2	3780000	3781000	109000	5.03743	11	8.59242e-08	7.28561e-05	3672000	3673000	3780000	3781000	11	1	AT2G09795	AT2G09970
Chr3	22494000	22495000	Chr3	22602000	22603000	109000	5.03743	10	1.44158e-06	0.000938289	22494000	22495000	22602000	22603000	10	1	AT3G60870,AT3G60880	AT3G61060
Chr4	1779000	1780000	Chr4	1887000	1888000	109000	5.03743	8	2.79823e-05	0.0128127	1779000	1780000	1887000	1888000	8	1	AT4G03827	AT4G03960
Chr2	2736000	2737000	Chr2	2843000	2844000	108000	5.03342	9	3.31947e-06	0.0019793	2735000	2737000	2843000	2844000	17	1	NA	AT2G06925
Chr3	22500000	22501000	Chr3	22606000	22607000	107000	5.02938	8	3.7501e-05	0.0164951	22500000	22501000	22606000	22607000	8	1	AT3G60900	AT3G61070,AT3G61080
Chr2	6052000	6053000	Chr2	6154000	6155000	103000	5.01284	8	5.49635e-05	0.0228951	6052000	6053000	6154000	6155000	8	1	AT2G14282,AT2G14285	AT2G14440,AT2G14460
Chr4	3664000	3665000	Chr4	3766000	3767000	103000	5.01284	7	0.000114395	0.0425314	3664000	3665000	3766000	3767000	7	1	AT4G06598	AT4G06634
Chr3	22353000	22354000	Chr3	22453000	22454000	101000	5.00432	8	8.0846e-05	0.031804	22353000	22354000	22453000	22454000	8	1	AT3G60500	AT3G60720,AT3G60730,AT3G60740,AT3G60750
Chr4	3666000	3667000	Chr4	3766000	3767000	101000	5.00432	10	4.01256e-07	0.000297332	3666000	3667000	3766000	3767000	10	1	AT4G06599	AT4G06634
Chr2	4317000	4318000	Chr2	4416000	4417000	100000	5	9	8.00255e-06	0.00431114	4317000	4318000	4416000	4417000	9	1	AT2G10950,AT2G10965	NA
Chr3	11384000	11385000	Chr3	11482000	11483000	99000	4.99564	8	2.33975e-05	0.0109791	11384000	11385000	11482000	11483000	8	1	AT3G29575	AT3G29638,AT3G29639
Chr3	15092000	15093000	Chr3	15190000	15191000	99000	4.99564	9	6.88524e-06	0.00377035	15092000	15093000	15190000	15191000	9	1	AT3G43110,AT3G43120	AT3G43190,AT3G43210
Chr2	1262000	1263000	Chr2	1359000	1360000	98000	4.99123	11	8.81591e-08	7.45398e-05	1262000	1263000	1359000	1360000	11	1	AT2G03980	AT2G04063,AT2G04066,AT2G04070,AT2G04080,AT2G04090
Chr3	11386000	11387000	Chr3	11482000	11483000	97000	4.98677	8	5.0382e-05	0.0212382	11386000	11387000	11482000	11483000	8	1	NA	AT3G29638,AT3G29639
Chr5	10543000	10544000	Chr5	10639000	10640000	97000	4.98677	8	5.51852e-05	0.0229776	10543000	10544000	10639000	10640000	8	1	AT5G28540	AT5G28640
Chr2	2362000	2363000	Chr2	2457000	2458000	96000	4.98227	9	4.028e-06	0.00235181	2362000	2363000	2457000	2459000	17	1	AT2G06050,AT2G06090	AT2G06255
Chr5	11727000	11728000	Chr5	11822000	11823000	96000	4.98227	8	1.55804e-05	0.00770575	11727000	11728000	11822000	11823000	8	1	NA	NA
Chr1	13470000	13471000	Chr1	13559000	13560000	90000	4.95424	8	8.19315e-05	0.0321676	13470000	13471000	13559000	13560000	8	1	AT1G36070	NA
Chr1	12262000	12263000	Chr1	12351000	12352000	90000	4.95424	9	9.65528e-06	0.00508971	12262000	12263000	12351000	12352000	9	1	AT1G33800,AT1G33810,AT1G33811	AT1G33970,AT1G33980
Chr2	4802000	4803000	Chr2	4891000	4892000	90000	4.95424	9	6.27601e-06	0.00347962	4802000	4803000	4891000	4892000	9	1	AT2G11890	AT2G12170,AT2G12190,AT2G12200
Chr1	12752000	12753000	Chr1	12840000	12841000	89000	4.94939	8	4.96901e-05	0.0209904	12752000	12753000	12840000	12841000	8	1	AT1G34844	NA
Chr2	5420000	5421000	Chr2	5508000	5509000	89000	4.94939	8	4.89972e-05	0.0207523	5420000	5421000	5508000	5509000	8	1	AT2G13125,AT2G13126	AT2G13273
Chr5	10936000	10937000	Chr5	11024000	11025000	89000	4.94939	8	6.21941e-05	0.0254262	10936000	10937000	11024000	11025000	8	1	NA	AT5G29000
Chr4	2820000	2821000	Chr4	2907000	2908000	88000	4.94448	8	3.75805e-05	0.0165236	2820000	2821000	2907000	2908000	8	1	AT4G05540,AT4G05553	AT4G05590
Chr5	10940000	10941000	Chr5	11025000	11026000	86000	4.9345	13	1.28531e-09	1.49944e-06	10939000	10941000	11024000	11026000	34	0.75	AT5G28919,AT5G28920	NA
Chr2	7201000	7202000	Chr2	7285000	7286000	85000	4.92942	9	1.48108e-05	0.00737068	7201000	7202000	7285000	7286000	9	1	AT2G16600,AT2G16620	AT2G16790,AT2G16800,AT2G16810,AT2G16835
Chr2	4807000	4808000	Chr2	4891000	4892000	85000	4.92942	8	2.93308e-05	0.0133375	4807000	4808000	4891000	4892000	8	1	AT2G11910	AT2G12170,AT2G12190,AT2G12200
Chr3	11299000	11300000	Chr3	11383000	11384000	85000	4.92942	9	6.51203e-06	0.00359178	11299000	11300000	11383000	11384000	9	1	AT3G29400,AT3G29410	AT3G29575
Chr1	13559000	13560000	Chr1	13642000	13643000	84000	4.92428	10	2.14136e-06	0.00133841	13559000	13560000	13642000	13643000	10	1	NA	AT1G36280
Chr3	13591000	13592000	Chr3	13673000	13674000	83000	4.91908	8	6.3909e-05	0.0260328	13591000	13592000	13673000	13674000	8	1	NA	NA
Chr1	13369000	13370000	Chr1	13450000	13451000	82000	4.91381	8	4.71248e-05	0.0200708	13369000	13370000	13450000	13451000	8	1	AT1G35910	AT1G36050
Chr1	13559000	13560000	Chr1	13640000	13641000	82000	4.91381	11	1.26131e-07	0.000103615	13559000	13560000	13640000	13641000	11	1	NA	AT1G36272,AT1G36280
Chr3	22484000	22485000	Chr3	22565000	22566000	82000	4.91381	10	2.99152e-06	0.00180244	22484000	22485000	22565000	22566000	10	1	AT3G60850,AT3G60860	AT3G60972,AT3G60980
Chr1	16151000	16152000	Chr1	16231000	16232000	81000	4.90849	9	1.47489e-05	0.00734645	16151000	16152000	16231000	16232000	9	1	AT1G43005,AT1G43010,AT1G43020	AT1G43130
Chr1	16230000	16231000	Chr1	16310000	16311000	81000	4.90849	8	4.68275e-05	0.0199562	16230000	16231000	16310000	16311000	8	1	AT1G43130	AT1G43245,AT1G43260
Chr4	2034000	2035000	Chr4	2114000	2115000	81000	4.90849	8	6.26303e-05	0.0255776	2034000	2035000	2114000	2115000	8	1	AT4G04220	AT4G04320
Chr5	8693000	8694000	Chr5	8773000	8774000	81000	4.90849	8	8.35196e-05	0.0327101	8693000	8694000	8773000	8774000	8	1	AT5G25170	AT5G25280
Chr2	2764000	2765000	Chr2	2843000	2844000	80000	4.90309	8	5.66992e-05	0.0235262	2764000	2765000	2843000	2844000	8	1	AT2G06850	AT2G06925
Chr1	17644000	17645000	Chr1	17722000	17723000	79000	4.89763	8	0.000115384	0.0428233	17644000	17645000	17722000	17723000	8	1	AT1G47885,AT1G47890	NA
Chr2	1185000	1186000	Chr2	1263000	1264000	79000	4.89763	11	1.88111e-07	0.00014937	1185000	1186000	1263000	1264000	11	1	AT2G03890	NA
Chr2	2359000	2360000	Chr2	2436000	2437000	78000	4.89209	9	1.22773e-05	0.00627615	2359000	2360000	2436000	2437000	9	1	AT2G06050	AT2G06210
Chr3	15015000	15016000	Chr3	15092000	15093000	78000	4.89209	10	3.53593e-06	0.00209201	15015000	15016000	15092000	15093000	10	1	AT3G42940,AT3G42950	AT3G43110,AT3G43120
Chr3	11509000	11510000	Chr3	11586000	11587000	78000	4.89209	8	4.42141e-05	0.0189976	11509000	11510000	11586000	11587000	8	1	NA	AT3G29740,AT3G29750
Chr2	1263000	1264000	Chr2	1339000	1340000	77000	4.88649	8	6.606e-05	0.0267507	1263000	1264000	1339000	1340000	8	1	NA	AT2G04038,AT2G04039,AT2G04040,AT2G04050,AT2G04060
Chr5	10784000	10785000	Chr5	10860000	10861000	77000	4.88649	8	6.22703e-05	0.0254507	10784000	10786000	10860000	10862000	16	0.5	AT5G28750	NA
Chr2	2361000	2362000	Chr2	2436000	2437000	76000	4.88081	12	1.76772e-08	1.70847e-05	2361000	2362000	2436000	2437000	12	1	AT2G06050	AT2G06210
Chr3	13591000	13592000	Chr3	13666000	13667000	76000	4.88081	9	1.04931e-05	0.00547569	13591000	13592000	13666000	13667000	9	1	NA	NA
Chr2	2983000	2984000	Chr2	3056000	3057000	74000	4.86923	8	9.05758e-05	0.0350691	2983000	2984000	3056000	3057000	8	1	AT2G07180,AT2G07190,AT2G07200	AT2G07360
Chr3	22521000	22522000	Chr3	22594000	22595000	74000	4.86923	8	6.71785e-05	0.0271541	22521000	22522000	22594000	22595000	8	1	AT3G60940	AT3G61035,AT3G61040
Chr3	10904000	10905000	Chr3	10977000	10978000	74000	4.86923	8	0.000107257	0.0403747	10904000	10905000	10977000	10978000	8	1	AT3G28900	AT3G28950
Chr3	7703000	7704000	Chr3	7775000	7776000	73000	4.86332	9	1.44958e-05	0.00723798	7703000	7704000	7775000	7776000	9	1	AT3G21865,AT3G21870	AT3G22050,AT3G22053,AT3G22057,AT3G22060,AT3G22070,AT3G22072
Chr5	10543000	10544000	Chr5	10615000	10616000	73000	4.86332	10	1.77853e-06	0.00113193	10543000	10544000	10615000	10616000	10	1	AT5G28540	NA
Chr2	689000	690000	Chr2	760000	761000	72000	4.85733	8	6.29013e-05	0.0256721	689000	690000	760000	761000	8	1	AT2G02550,AT2G02560	AT2G02710,AT2G02720,AT2G02730
Chr1	12961000	12962000	Chr1	13031000	13032000	71000	4.85126	9	1.92231e-05	0.00925544	12961000	12962000	13031000	13032000	9	1	AT1G35320	AT1G35430,AT1G35435
Chr2	4006000	4007000	Chr2	4076000	4077000	71000	4.85126	10	6.50679e-06	0.0035894	4006000	4008000	4076000	4077000	19	1	NA	NA
Chr2	4347000	4348000	Chr2	4417000	4418000	71000	4.85126	8	7.21651e-05	0.0288874	4347000	4348000	4417000	4418000	8	1	AT2G11000,AT2G11005	NA
Chr3	14239000	14240000	Chr3	14309000	14310000	71000	4.85126	10	1.51515e-06	0.000980756	14238000	14241000	14309000	14310000	27	1	NA	AT3G42140,AT3G42148,AT3G42150,AT3G42155
Chr4	5186000	5187000	Chr4	5256000	5257000	71000	4.85126	8	0.000117156	0.043363	5186000	5187000	5256000	5257000	8	1	AT4G08210	AT4G08330
Chr1	24417000	24418000	Chr1	24485000	24486000	69000	4.83885	11	9.70185e-07	0.000660266	24417000	24418000	24485000	24486000	11	1	AT1G65630,AT1G65640,AT1G65650	AT1G65820
Chr3	22535000	22536000	Chr3	22603000	22604000	69000	4.83885	10	5.15813e-06	0.0029279	22535000	22536000	22603000	22604000	10	1	AT3G60960	AT3G61060
Chr4	4798000	4799000	Chr4	4866000	4867000	69000	4.83885	11	1.74626e-07	0.00013966	4798000	4799000	4866000	4867000	11	1	AT4G07940,AT4G07950	AT4G08035
Chr3	17020000	17021000	Chr3	17087000	17088000	68000	4.83251	8	9.32181e-05	0.0359543	17020000	17021000	17087000	17088000	8	1	AT3G46320,AT3G46330,AT3G46340	AT3G46410,AT3G46420,AT3G46430
Chr2	2362000	2363000	Chr2	2428000	2429000	67000	4.82607	11	3.442e-07	0.000258353	2362000	2363000	2427000	2430000	28	1	AT2G06050,AT2G06090	AT2G06210
Chr2	1735000	1736000	Chr2	1801000	1802000	67000	4.82607	9	1.27737e-05	0.00649149	1735000	1736000	1801000	1802000	9	1	AT2G04930	NA
Chr2	1732000	1733000	Chr2	1798000	1799000	67000	4.82607	8	9.40469e-05	0.0362183	1732000	1733000	1798000	1799000	8	1	AT2G04925	AT2G05050,AT2G05060
Chr2	8513000	8514000	Chr2	8579000	8580000	67000	4.82607	10	1.61839e-05	0.00796429	8513000	8514000	8579000	8580000	10	1	AT2G19730,AT2G19740	NA
Chr3	22693000	22694000	Chr3	22759000	22760000	67000	4.82607	9	5.55851e-05	0.0231144	22693000	22694000	22759000	22760000	9	1	AT3G61320	AT3G61490
Chr1	22551000	22552000	Chr1	22616000	22617000	66000	4.81954	9	1.43109e-05	0.00715852	22551000	22552000	22616000	22617000	9	1	AT1G61180	AT1G61310,AT1G61320
Chr2	4076000	4077000	Chr2	4141000	4142000	66000	4.81954	15	1.03389e-10	1.4435e-07	4076000	4077000	4141000	4143000	25	1	NA	NA
Chr2	5050000	5051000	Chr2	5115000	5116000	66000	4.81954	10	4.76245e-06	0.0027298	5049000	5051000	5115000	5116000	19	1	AT2G12461,AT2G12462	AT2G12550,AT2G12557
Chr2	1198000	1199000	Chr2	1263000	1264000	66000	4.81954	8	0.000111355	0.041628	1198000	1199000	1263000	1264000	8	1	AT2G03913,AT2G03930	NA
Chr3	22500000	22501000	Chr3	22565000	22566000	66000	4.81954	8	7.93371e-05	0.0312959	22500000	22501000	22565000	22566000	8	1	AT3G60900	AT3G60972,AT3G60980
Chr3	15502000	15503000	Chr3	15567000	15568000	66000	4.81954	8	0.000102187	0.0387864	15502000	15503000	15567000	15568000	8	1	AT3G43580	AT3G43660,AT3G43670
Chr3	9360000	9361000	Chr3	9425000	9426000	66000	4.81954	9	5.00381e-05	0.0211172	9360000	9361000	9425000	9426000	9	1	AT3G25700	AT3G25795,AT3G25800
Chr5	10070000	10071000	Chr5	10135000	10136000	66000	4.81954	11	2.58069e-07	0.000199461	10070000	10071000	10135000	10136000	11	1	AT5G28060	AT5G28150
Chr1	13836000	13837000	Chr1	13900000	13901000	65000	4.81291	11	1.19582e-07	9.85683e-05	13836000	13837000	13900000	13901000	11	1	AT1G36622	AT1G36730,AT1G36732
Chr2	2983000	2984000	Chr2	3047000	3048000	65000	4.81291	8	0.000128487	0.0468766	2983000	2984000	3047000	3048000	8	1	AT2G07180,AT2G07190,AT2G07200	AT2G07360
Chr4	7536000	7537000	Chr4	7600000	7601000	65000	4.81291	8	0.000127878	0.046683	7536000	7537000	7600000	7601000	8	1	AT4G12840,AT4G12850,AT4G12860	AT4G13010,AT4G13020,AT4G13030
Chr5	10876000	10877000	Chr5	10940000	10941000	65000	4.81291	13	7.52358e-09	7.7646e-06	10876000	10877000	10940000	10941000	13	1	AT5G28850	AT5G28919,AT5G28920
Chr2	2362000	2363000	Chr2	2425000	2426000	64000	4.80618	8	7.81741e-05	0.030914	2362000	2363000	2425000	2426000	8	1	AT2G06050,AT2G06090	AT2G06200
Chr3	11861000	11862000	Chr3	11924000	11925000	64000	4.80618	11	3.55811e-07	0.00026622	11861000	11862000	11924000	11925000	11	1	NA	AT3G30280,AT3G30290,AT3G30300,AT3G30320
Chr3	15343000	15344000	Chr3	15406000	15407000	64000	4.80618	9	2.61682e-05	0.0120795	15343000	15344000	15406000	15407000	9	1	AT3G43400,AT3G43402,AT3G43410	AT3G43520
Chr5	13356000	13357000	Chr5	13419000	13420000	64000	4.80618	8	0.000123217	0.0452106	13356000	13357000	13419000	13420000	8	1	AT5G35080	AT5G35170
Chr1	13497000	13498000	Chr1	13559000	13560000	63000	4.79934	8	9.40894e-05	0.0362293	13497000	13498000	13559000	13560000	8	1	AT1G36095,AT1G36100	NA
Chr2	5053000	5054000	Chr2	5115000	5116000	63000	4.79934	9	2.64583e-05	0.0122011	5053000	5054000	5115000	5116000	9	1	NA	AT2G12550,AT2G12557
Chr2	4416000	4417000	Chr2	4478000	4479000	63000	4.79934	12	5.84194e-08	5.10636e-05	4416000	4417000	4478000	4479000	12	1	NA	NA
Chr3	10968000	10969000	Chr3	11030000	11031000	63000	4.79934	10	1.42934e-05	0.00715069	10968000	10970000	11030000	11031000	19	1	AT3G28940	AT3G29033,AT3G29036,AT3G29034
Chr3	11530000	11531000	Chr3	11592000	11593000	63000	4.79934	8	5.13999e-05	0.0216157	11530000	11531000	11592000	11593000	8	1	NA	AT3G29763,AT3G29765
Chr5	10800000	10801000	Chr5	10862000	10863000	63000	4.79934	10	8.42579e-07	0.00058167	10800000	10801000	10861000	10863000	20	1	NA	AT5G28840
Chr3	22521000	22522000	Chr3	22582000	22583000	62000	4.79239	14	6.10765e-11	8.83354e-08	22521000	22522000	22581000	22583000	23	1	AT3G60940	AT3G61028,AT3G61030
Chr2	1740000	1741000	Chr2	1800000	1801000	61000	4.78533	8	3.17551e-05	0.0142828	1740000	1741000	1800000	1801000	8	1	AT2G04940	AT2G05070
Chr3	7784000	7785000	Chr3	7844000	7845000	61000	4.78533	8	0.000127179	0.0464758	7784000	7785000	7844000	7845000	8	1	AT3G22100	AT3G22230,AT3G22231
Chr4	1960000	1961000	Chr4	2020000	2021000	61000	4.78533	11	3.04608e-07	0.000231428	1960000	1961000	2020000	2021000	11	1	AT4G04077,AT4G04078,AT4G04080,AT4G04090	AT4G04180
Chr5	13359000	13360000	Chr5	13419000	13420000	61000	4.78533	9	4.43206e-05	0.019037	13359000	13360000	13419000	13420000	9	1	AT5G35090	AT5G35170
Chr5	12558000	12559000	Chr5	12618000	12619000	61000	4.78533	12	2.69955e-08	2.52011e-05	12558000	12559000	12618000	12619000	12	1	AT5G33290	NA
Chr2	4083000	4084000	Chr2	4142000	4143000	60000	4.77815	9	2.94022e-05	0.0133637	4083000	4084000	4141000	4143000	18	1	AT2G10535,AT2G10537	AT2G10606,AT2G10608
Chr2	4743000	4744000	Chr2	4802000	4803000	60000	4.77815	10	5.25917e-06	0.00297851	4743000	4744000	4802000	4803000	10	1	AT2G11810	AT2G11890
Chr2	2924000	2925000	Chr2	2983000	2984000	60000	4.77815	10	3.60859e-06	0.00213158	2924000	2925000	2983000	2984000	10	1	AT2G07050	AT2G07180,AT2G07190,AT2G07200
Chr2	5959000	5960000	Chr2	6017000	6018000	59000	4.77085	9	4.96e-05	0.0209585	5959000	5960000	6017000	6018000	9	1	AT2G14120	AT2G14206
Chr2	2084000	2085000	Chr2	2142000	2143000	59000	4.77085	8	0.000111588	0.0416912	2084000	2085000	2142000	2143000	8	1	AT2G05630,AT2G05632,AT2G05635	AT2G05710,AT2G05720
Chr3	15971000	15972000	Chr3	16029000	16030000	59000	4.77085	11	3.37459e-06	0.00200887	15971000	15972000	16029000	16030000	11	1	AT3G44280	NA
Chr5	13361000	13362000	Chr5	13419000	13420000	59000	4.77085	15	6.15787e-11	8.90286e-08	13361000	13362000	13419000	13420000	15	1	AT5G35100	AT5G35170
Chr5	15644000	15645000	Chr5	15702000	15703000	59000	4.77085	9	4.93502e-05	0.0208802	15644000	15645000	15702000	15703000	9	1	AT5G39090,AT5G39100	AT5G39190,AT5G39200,AT5G39210
Chr5	10070000	10071000	Chr5	10128000	10129000	59000	4.77085	14	1.76685e-09	2.0182e-06	10070000	10071000	10128000	10129000	14	1	AT5G28060	NA
Chr2	4743000	4744000	Chr2	4800000	4801000	58000	4.76343	16	4.96657e-12	8.39313e-09	4743000	4744000	4800000	4801000	16	1	AT2G11810	NA
Chr2	2215000	2216000	Chr2	2272000	2273000	58000	4.76343	10	5.91601e-06	0.00330263	2215000	2216000	2272000	2273000	10	1	AT2G05810,AT2G05812	AT2G05920
Chr1	13223000	13224000	Chr1	13279000	13280000	57000	4.75587	9	3.25194e-05	0.0145768	13223000	13224000	13279000	13280000	9	1	AT1G35710	AT1G35780
Chr3	15349000	15350000	Chr3	15405000	15406000	57000	4.75587	8	4.43379e-05	0.0190424	15349000	15350000	15405000	15406000	8	1	NA	AT3G43490,AT3G43500,AT3G43505
Chr4	1875000	1876000	Chr4	1931000	1932000	57000	4.75587	9	1.19804e-05	0.00614459	1875000	1876000	1931000	1932000	9	1	AT4G03940	NA
Chr4	10899000	10900000	Chr4	10955000	10956000	57000	4.75587	9	0.000110984	0.0415216	10899000	10900000	10955000	10956000	9	1	AT4G20170,AT4G20190,AT4G20200	AT4G20290,AT4G20300
Chr4	2661000	2662000	Chr4	2717000	2718000	57000	4.75587	10	4.52384e-06	0.00260783	2661000	2662000	2717000	2718000	10	1	AT4G05150	NA
Chr1	12986000	12987000	Chr1	13041000	13042000	56000	4.74819	8	0.000130822	0.04757	12986000	12987000	13041000	13042000	8	1	AT1G35365	AT1G35460,AT1G35461
Chr2	7201000	7202000	Chr2	7256000	7257000	56000	4.74819	9	9.7966e-05	0.0374604	7201000	7202000	7256000	7257000	9	1	AT2G16600,AT2G16620	AT2G16720
Chr3	22521000	22522000	Chr3	22576000	22577000	56000	4.74819	15	1.39605e-10	1.9087e-07	22519000	22523000	22575000	22577000	63	0.75	AT3G60940	NA
Chr3	11758000	11759000	Chr3	11813000	11814000	56000	4.74819	9	2.60541e-05	0.012039	11758000	11759000	11813000	11814000	9	1	NA	AT3G30180
Chr3	15925000	15926000	Chr3	15980000	15981000	56000	4.74819	9	2.87936e-05	0.0131262	15925000	15926000	15980000	15981000	9	1	AT3G44220,AT3G44230,AT3G44235	NA
Chr4	10508000	10509000	Chr4	10563000	10564000	56000	4.74819	17	3.30843e-12	5.6975e-09	10508000	10509000	10563000	10564000	17	1	AT4G19220	AT4G19350,AT4G19360
Chr5	18189000	18190000	Chr5	18244000	18245000	56000	4.74819	9	6.39089e-05	0.0260328	18189000	18190000	18244000	18245000	9	1	AT5G45070	AT5G45120,AT5G45130
Chr5	15254000	15255000	Chr5	15309000	15310000	56000	4.74819	9	4.25506e-05	0.0183732	15254000	15255000	15309000	15310000	9	1	AT5G38195,AT5G38197	AT5G38310,AT5G38314,AT5G38317
Chr2	6493000	6494000	Chr2	6547000	6548000	55000	4.74036	9	3.17486e-05	0.0142807	6493000	6494000	6547000	6548000	9	1	AT2G15020	NA
Chr3	11538000	11539000	Chr3	11592000	11593000	55000	4.74036	10	2.64255e-06	0.00161493	11538000	11539000	11592000	11593000	10	1	NA	AT3G29763,AT3G29765
Chr4	5499000	5500000	Chr4	5553000	5554000	55000	4.74036	11	2.96566e-07	0.000226114	5499000	5500000	5553000	5554000	11	1	AT4G08620,AT4G08630	AT4G08690,AT4G08691
Chr4	7290000	7291000	Chr4	7344000	7345000	55000	4.74036	9	9.06463e-05	0.0350912	7290000	7291000	7344000	7345000	9	1	AT4G12250	AT4G12410
Chr5	10038000	10039000	Chr5	10092000	10093000	55000	4.74036	9	2.86131e-05	0.0130577	10038000	10039000	10092000	10093000	9	1	AT5G28040	AT5G28070,AT5G28080,AT5G28090
Chr5	1063000	1064000	Chr5	1117000	1118000	55000	4.74036	9	6.39677e-05	0.026052	1063000	1064000	1117000	1118000	9	1	AT5G03940,AT5G03944	NA
Chr2	5543000	5544000	Chr2	5596000	5597000	54000	4.73239	8	0.000102761	0.0389644	5543000	5544000	5596000	5597000	8	1	NA	AT2G13440
Chr2	12099000	12100000	Chr2	12152000	12153000	54000	4.73239	9	0.000124257	0.0455321	12099000	12100000	12152000	12153000	9	1	AT2G28320,AT2G28330	AT2G28400,AT2G28401,AT2G28405
Chr5	8469000	8470000	Chr5	8522000	8523000	54000	4.73239	9	7.82054e-05	0.0309248	8469000	8470000	8522000	8523000	9	1	AT5G24735,AT5G24740	AT5G24810,AT5G24820
Chr5	14541000	14542000	Chr5	14594000	14595000	54000	4.73239	11	1.43708e-06	0.000935829	14541000	14542000	14594000	14595000	11	1	AT5G36890	AT5G36940,AT5G36950
Chr1	17518000	17519000	Chr1	17570000	17571000	53000	4.72428	9	0.000117538	0.04349	17518000	17519000	17570000	17571000	9	1	AT1G47620,AT1G47640	AT1G47750,AT1G47760,AT1G47765
Chr1	17635000	17636000	Chr1	17687000	17688000	53000	4.72428	10	1.46958e-05	0.00732232	17635000	17636000	17687000	17688000	10	1	AT1G47870	AT1G47970
Chr1	13588000	13589000	Chr1	13640000	13641000	53000	4.72428	10	6.97432e-06	0.00381376	13588000	13589000	13640000	13641000	10	1	NA	AT1G36272,AT1G36280
Chr1	13227000	13228000	Chr1	13279000	13280000	53000	4.72428	14	1.01969e-08	1.02767e-05	13227000	13228000	13279000	13280000	14	1	AT1G35720,AT1G35730	AT1G35780
Chr1	16913000	16914000	Chr1	16965000	16966000	53000	4.72428	11	3.78184e-06	0.00222294	16913000	16914000	16965000	16966000	11	1	AT1G44790	NA
Chr2	2931000	2932000	Chr2	2983000	2984000	53000	4.72428	13	1.58588e-08	1.54676e-05	2931000	2932000	2983000	2984000	13	1	NA	AT2G07180,AT2G07190,AT2G07200
Chr3	5547000	5548000	Chr3	5599000	5600000	53000	4.72428	9	9.98444e-05	0.038044	5547000	5548000	5599000	5600000	9	1	AT3G16350	AT3G16470,AT3G16480,AT3G16490
Chr4	14351000	14352000	Chr4	14403000	14404000	53000	4.72428	10	6.81206e-05	0.0274951	14351000	14352000	14403000	14404000	10	1	AT4G29120	AT4G29210,AT4G29220
Chr5	8660000	8661000	Chr5	8712000	8713000	53000	4.72428	8	0.000104575	0.0395213	8660000	8661000	8712000	8713000	8	1	AT5G25110	NA
Chr5	10186000	10187000	Chr5	10238000	10239000	53000	4.72428	10	1.3871e-06	0.000906166	10186000	10187000	10238000	10239000	10	1	NA	AT5G28262
Chr1	22558000	22559000	Chr1	22609000	22610000	52000	4.716	23	1.20285e-21	6.19376e-18	22557000	22559000	22609000	22610000	31	1	AT1G61190	AT1G61300
Chr1	12685000	12686000	Chr1	12736000	12737000	52000	4.716	8	8.68734e-05	0.0338396	12685000	12686000	12736000	12737000	8	1	AT1G34630	AT1G34750
Chr2	1800000	1801000	Chr2	1851000	1852000	52000	4.716	8	0.0001222	0.0449305	1800000	1801000	1851000	1852000	8	1	AT2G05070	AT2G05140
Chr2	8570000	8571000	Chr2	8621000	8622000	52000	4.716	9	0.000105491	0.0398305	8570000	8571000	8621000	8622000	9	1	AT2G19850,AT2G19860	AT2G19950,AT2G19960,AT2G19970,AT2G19980
Chr3	14879000	14880000	Chr3	14930000	14931000	52000	4.716	10	5.14198e-06	0.00292064	14879000	14880000	14930000	14931000	10	1	AT3G42790	AT3G42830
Chr3	11052000	11053000	Chr3	11103000	11104000	52000	4.716	11	1.93844e-06	0.00122261	11052000	11053000	11103000	11104000	11	1	AT3G29075	AT3G29130
Chr4	9045000	9046000	Chr4	9096000	9097000	52000	4.716	12	1.85072e-06	0.00117221	9045000	9046000	9096000	9097000	12	1	AT4G15955,AT4G15960	AT4G16060,AT4G16070
Chr1	16654000	16655000	Chr1	16704000	16705000	51000	4.70757	10	4.90736e-06	0.00280212	16654000	16655000	16704000	16705000	10	1	AT1G43900	NA
Chr3	15355000	15356000	Chr3	15405000	15406000	51000	4.70757	13	3.37389e-09	3.6969e-06	15354000	15356000	15405000	15406000	21	1	AT3G43430,AT3G43431	AT3G43490,AT3G43500,AT3G43505
Chr3	15517000	15518000	Chr3	15567000	15568000	51000	4.70757	16	1.23093e-10	1.69636e-07	15517000	15518000	15567000	15569000	25	1	AT3G43600,AT3G43610	AT3G43660,AT3G43670
Chr3	11157000	11158000	Chr3	11207000	11208000	51000	4.70757	10	1.48192e-05	0.00737436	11157000	11158000	11207000	11208000	10	1	AT3G29185	AT3G29255
Chr4	5923000	5924000	Chr4	5973000	5974000	51000	4.70757	11	2.149e-06	0.00134297	5923000	5924000	5973000	5976000	29	1	AT4G09320	AT4G09430,AT4G09432
Chr5	915000	916000	Chr5	965000	966000	51000	4.70757	9	4.47547e-05	0.0191906	915000	916000	965000	966000	9	1	AT5G03590,AT5G03600,AT5G03610	AT5G03690,AT5G03700
Chr1	16488000	16489000	Chr1	16537000	16538000	50000	4.69897	9	5.13371e-06	0.00291616	16488000	16489000	16537000	16538000	9	1	AT1G43710,AT1G43720,AT1G43722	AT1G43760,AT1G43765
Chr1	22560000	22561000	Chr1	22609000	22610000	50000	4.69897	14	3.36447e-09	3.6871e-06	22560000	22561000	22609000	22610000	14	1	AT1G61190,AT1G61200,AT1G61210	AT1G61300
Chr2	2185000	2186000	Chr2	2234000	2235000	50000	4.69897	10	7.23877e-07	0.000507749	2185000	2186000	2234000	2235000	10	1	NA	AT2G05840
Chr3	10911000	10912000	Chr3	10960000	10961000	50000	4.69897	10	1.05594e-05	0.00550472	10911000	10912000	10960000	10961000	10	1	AT3G28910	AT3G28925,AT3G28930
Chr3	4910000	4911000	Chr3	4959000	4960000	50000	4.69897	9	0.000122403	0.0449799	4910000	4911000	4959000	4960000	9	1	AT3G14595,AT3G14600	AT3G14770,AT3G14780
Chr4	1154000	1155000	Chr4	1203000	1204000	50000	4.69897	10	4.03537e-05	0.017569	1154000	1155000	1203000	1204000	10	1	AT4G02640	AT4G02715,AT4G02720
Chr5	18189000	18190000	Chr5	18238000	18239000	50000	4.69897	9	5.60754e-05	0.0232947	18189000	18190000	18238000	18239000	9	1	AT5G45070	NA
Chr5	37000	38000	Chr5	86000	87000	50000	4.69897	9	0.000113842	0.0423684	37000	38000	86000	87000	9	1	AT5G01100	AT5G01215,AT5G01210,AT5G01220
Chr1	6698000	6699000	Chr1	6746000	6747000	49000	4.6902	11	8.43325e-06	0.00451781	6698000	6699000	6746000	6747000	11	1	AT1G19370,AT1G19371,AT1G19373,AT1G19376,AT1G19380,AT1G19390	AT1G19480,AT1G19485
Chr1	12688000	12689000	Chr1	12736000	12737000	49000	4.6902	11	1.33383e-06	0.000875707	12688000	12689000	12736000	12737000	11	1	AT1G34640,AT1G34650	AT1G34750
Chr1	12542000	12543000	Chr1	12590000	12591000	49000	4.6902	9	0.000100788	0.038347	12542000	12543000	12590000	12591000	9	1	AT1G34355,AT1G34360	AT1G34430,AT1G34440,AT1G34460
Chr2	5977000	5978000	Chr2	6025000	6026000	49000	4.6902	10	4.9068e-06	0.002802	5977000	5978000	6025000	6026000	10	1	AT2G14160,AT2G14170	NA
Chr3	15358000	15359000	Chr3	15406000	15407000	49000	4.6902	9	2.92759e-05	0.0133172	15358000	15359000	15406000	15407000	9	1	AT3G43432	AT3G43520
Chr3	1936000	1937000	Chr3	1984000	1985000	49000	4.6902	10	7.36043e-05	0.0293833	1936000	1937000	1984000	1985000	10	1	AT3G06370,AT3G06380	AT3G06460,AT3G06470
Chr3	10934000	10935000	Chr3	10982000	10983000	49000	4.6902	9	5.96738e-05	0.0245716	10934000	10935000	10982000	10983000	9	1	AT3G28918	AT3G28956,AT3G28958,AT3G28960
Chr3	22555000	22556000	Chr3	22603000	22604000	49000	4.6902	9	0.000136471	0.0493401	22555000	22556000	22603000	22604000	9	1	AT3G60966,AT3G60970	AT3G61060
Chr4	7795000	7796000	Chr4	7843000	7844000	49000	4.6902	9	2.80262e-05	0.012829	7795000	7796000	7843000	7844000	9	1	AT4G13410	AT4G13495
Chr4	5995000	5996000	Chr4	6043000	6044000	49000	4.6902	9	0.000120659	0.044465	5995000	5996000	6043000	6044000	9	1	AT4G09462,AT4G09464,AT4G09465	AT4G09560
Chr5	4397000	4398000	Chr5	4445000	4446000	49000	4.6902	9	9.19545e-05	0.0355304	4397000	4398000	4445000	4446000	9	1	AT5G13640,AT5G13650	AT5G13770
Chr5	9327000	9328000	Chr5	9375000	9376000	49000	4.6902	9	0.000105684	0.039884	9327000	9328000	9375000	9376000	9	1	AT5G26660	AT5G26620,AT5G26610
Chr1	15603000	15604000	Chr1	15650000	15651000	48000	4.68124	16	1.45691e-10	1.98635e-07	15602000	15610000	15650000	15652000	155	0.6875	AT1G41830	AT1G41875
Chr1	16231000	16232000	Chr1	16278000	16279000	48000	4.68124	9	6.51994e-06	0.00359564	16231000	16232000	16278000	16279000	9	1	AT1G43130	AT1G43190
Chr2	5008000	5009000	Chr2	5055000	5056000	48000	4.68124	8	6.49263e-05	0.0263746	5008000	5009000	5055000	5056000	8	1	AT2G12400,AT2G12405	AT2G12465
Chr2	6565000	6566000	Chr2	6612000	6613000	48000	4.68124	9	3.06317e-05	0.0138432	6565000	6566000	6612000	6613000	9	1	AT2G15130	AT2G15230,AT2G15240
Chr3	11924000	11925000	Chr3	11971000	11972000	48000	4.68124	19	6.68908e-13	1.25476e-09	11923000	11925000	11971000	11972000	29	1	AT3G30280,AT3G30290,AT3G30300,AT3G30320	AT3G30350,AT3G30370
Chr3	22547000	22548000	Chr3	22594000	22595000	48000	4.68124	9	0.000104599	0.0395284	22547000	22548000	22594000	22595000	9	1	AT3G60961	AT3G61035,AT3G61040
Chr3	13482000	13483000	Chr3	13529000	13530000	48000	4.68124	9	1.45384e-05	0.00725693	13482000	13483000	13529000	13530000	9	1	NA	AT3G32980
Chr4	9724000	9725000	Chr4	9771000	9772000	48000	4.68124	12	2.7521e-07	0.000211455	9724000	9725000	9771000	9772000	12	1	AT4G17420,AT4G17430	AT4G17520
Chr4	5252000	5253000	Chr4	5299000	5300000	48000	4.68124	10	3.62259e-06	0.00213867	5252000	5253000	5299000	5300000	10	1	AT4G08300,AT4G08310,AT4G08320	AT4G08370
Chr5	10192000	10193000	Chr5	10239000	10240000	48000	4.68124	8	9.03006e-05	0.0349783	10192000	10193000	10239000	10240000	8	1	AT5G28210,AT5G28220	AT5G28262
Chr1	11482000	11483000	Chr1	11528000	11529000	47000	4.6721	10	4.94538e-05	0.0209095	11481000	11483000	11528000	11529000	20	1	AT1G31970	AT1G32050
Chr1	12984000	12985000	Chr1	13030000	13031000	47000	4.6721	10	2.13447e-05	0.0101448	12984000	12985000	13029000	13031000	20	1	AT1G35350	AT1G35430
Chr1	16264000	16265000	Chr1	16310000	16311000	47000	4.6721	9	2.44097e-05	0.0113861	16264000	16265000	16310000	16311000	9	1	AT1G43160	AT1G43245,AT1G43260
Chr1	17009000	17010000	Chr1	17055000	17056000	47000	4.6721	9	0.000101752	0.0386477	17009000	17010000	17055000	17056000	9	1	AT1G44980,AT1G44990,AT1G45000	NA
Chr1	24637000	24638000	Chr1	24683000	24684000	47000	4.6721	10	0.000108828	0.0408644	24637000	24638000	24683000	24684000	10	1	AT1G66160	AT1G66220,AT1G66230,AT1G66235
Chr1	18880000	18881000	Chr1	18926000	18927000	47000	4.6721	9	0.0001294	0.0471433	18880000	18881000	18926000	18927000	9	1	AT1G50930,AT1G50940,AT1G50950,AT1G50954	AT1G51035,AT1G51040,AT1G51055,AT1G51060
Chr2	5007000	5008000	Chr2	5053000	5054000	47000	4.6721	9	1.17311e-05	0.00603302	5007000	5009000	5049000	5054000	97	1	AT2G12400	NA
Chr2	6712000	6713000	Chr2	6758000	6759000	47000	4.6721	8	9.36657e-05	0.0360948	6712000	6713000	6758000	6759000	8	1	AT2G15400	AT2G15460,AT2G15470,AT2G15480
Chr2	1800000	1801000	Chr2	1846000	1847000	47000	4.6721	8	0.000109234	0.0409829	1800000	1801000	1846000	1847000	8	1	AT2G05070	AT2G05120
Chr3	11006000	11007000	Chr3	11052000	11053000	47000	4.6721	13	2.10207e-07	0.000165161	11006000	11007000	11051000	11053000	23	1	AT3G28990,AT3G29000,AT3G29010,AT3G29020	AT3G29075
Chr3	10914000	10915000	Chr3	10960000	10961000	47000	4.6721	13	1.78965e-07	0.000142793	10914000	10915000	10960000	10961000	13	1	NA	AT3G28925,AT3G28930
Chr3	5296000	5297000	Chr3	5342000	5343000	47000	4.6721	9	0.000127246	0.0464958	5296000	5297000	5342000	5343000	9	1	AT3G15620,AT3G15630,AT3G15640	AT3G15770,AT3G15780,AT3G15790,AT3G15800
Chr4	5927000	5928000	Chr4	5973000	5974000	47000	4.6721	20	9.62602e-14	2.01252e-10	5927000	5928000	5972000	5976000	62	1	AT4G09340	AT4G09430,AT4G09432
Chr5	13701000	13702000	Chr5	13747000	13748000	47000	4.6721	8	0.000102856	0.0389965	13701000	13702000	13747000	13748000	8	1	AT5G35510,AT5G35520	AT5G35560
Chr1	11693000	11694000	Chr1	11738000	11739000	46000	4.66276	9	5.1031e-05	0.0214815	11693000	11694000	11738000	11739000	9	1	AT1G32400,AT1G32410	AT1G32460
Chr1	13853000	13854000	Chr1	13898000	13899000	46000	4.66276	11	1.19908e-06	0.000796928	13853000	13854000	13898000	13899000	11	1	AT1G36640	AT1G36730,AT1G36732
Chr1	15891000	15892000	Chr1	15936000	15937000	46000	4.66276	10	2.31917e-06	0.0014381	15891000	15892000	15936000	15937000	10	1	AT1G42430	AT1G42470,AT1G42480
Chr2	5005000	5006000	Chr2	5050000	5051000	46000	4.66276	11	1.58036e-06	0.00101805	5004000	5006000	5050000	5051000	21	1	AT2G12400	AT2G12461,AT2G12462
Chr2	5906000	5907000	Chr2	5951000	5952000	46000	4.66276	11	1.84465e-06	0.00116903	5906000	5907000	5951000	5952000	11	1	AT2G14045	AT2G14110
Chr3	6825000	6826000	Chr3	6870000	6871000	46000	4.66276	9	0.000114095	0.0424465	6825000	6826000	6870000	6871000	9	1	AT3G19650,AT3G19660,AT3G19663	AT3G19780
Chr3	16524000	16525000	Chr3	16569000	16570000	46000	4.66276	10	3.2607e-05	0.0146111	16524000	16525000	16569000	16570000	10	1	AT3G45140,AT3G45150,AT3G45160	AT3G45220,AT3G45230
Chr3	10904000	10905000	Chr3	10949000	10950000	46000	4.66276	9	0.000133592	0.048448	10904000	10905000	10949000	10950000	9	1	AT3G28900	NA
Chr3	22361000	22362000	Chr3	22406000	22407000	46000	4.66276	9	0.000136319	0.049299	22361000	22362000	22406000	22407000	9	1	AT3G60520	AT3G60620
Chr4	3895000	3896000	Chr4	3940000	3941000	46000	4.66276	10	7.56609e-06	0.00410044	3895000	3896000	3940000	3941000	10	1	NA	AT4G06701
Chr5	14541000	14542000	Chr5	14586000	14587000	46000	4.66276	10	6.55487e-05	0.0265769	14541000	14542000	14586000	14587000	10	1	AT5G36890	NA
Chr1	15606000	15607000	Chr1	15650000	15651000	45000	4.65321	14	1.19997e-09	1.40876e-06	15602000	15610000	15650000	15652000	155	0.6875	AT1G41830	AT1G41875
Chr1	21267000	21268000	Chr1	21311000	21312000	45000	4.65321	16	2.21357e-09	2.49078e-06	21266000	21269000	21311000	21312000	41	1	AT1G56730,AT1G56740,AT1G56750,AT1G56760,AT1G56770,AT1G56780,AT1G56790,AT1G56800,AT1G56810,AT1G56820,AT1G56830,AT1G56840,AT1G56850,AT1G56860,AT1G56870,AT1G56880,AT1G56890,AT1G56900,AT1G56910	AT1G57540,AT1G57550
Chr1	12986000	12987000	Chr1	13030000	13031000	45000	4.65321	12	2.68459e-07	0.000206731	12986000	12987000	13030000	13031000	12	1	AT1G35365	AT1G35430
Chr1	6168000	6169000	Chr1	6212000	6213000	45000	4.65321	10	2.20487e-05	0.010432	6168000	6169000	6212000	6213000	10	1	AT1G17930,AT1G17940,AT1G17950	AT1G18060
Chr1	13559000	13560000	Chr1	13603000	13604000	45000	4.65321	9	5.43412e-05	0.0226787	13559000	13560000	13603000	13604000	9	1	NA	AT1G36230
Chr1	10330000	10331000	Chr1	10374000	10375000	45000	4.65321	9	7.05374e-05	0.0283262	10330000	10331000	10374000	10375000	9	1	AT1G29490,AT1G29500,AT1G29510,AT1G29520,AT1G29530,AT1G29540,AT1G29550,AT1G29560	AT1G29660
Chr2	13210000	13211000	Chr2	13254000	13255000	45000	4.65321	11	3.9263e-06	0.00229934	13210000	13211000	13254000	13255000	11	1	AT2G31040,AT2G31050	AT2G31083,AT2G31085
Chr2	7200000	7201000	Chr2	7244000	7245000	45000	4.65321	10	6.58301e-05	0.0266687	7200000	7201000	7244000	7245000	10	1	AT2G16595,AT2G16600	AT2G16700
Chr2	5981000	5982000	Chr2	6025000	6026000	45000	4.65321	11	7.46966e-07	0.000522389	5981000	5982000	6025000	6026000	11	1	AT2G14170	NA
Chr3	1940000	1941000	Chr3	1984000	1985000	45000	4.65321	10	2.44124e-05	0.0113866	1940000	1941000	1984000	1985000	10	1	AT3G06390,AT3G06400	AT3G06460,AT3G06470
Chr4	9724000	9725000	Chr4	9768000	9769000	45000	4.65321	11	2.54294e-05	0.0117967	9724000	9725000	9768000	9769000	11	1	AT4G17420,AT4G17430	AT4G17510
Chr4	2673000	2674000	Chr4	2717000	2718000	45000	4.65321	9	6.5548e-05	0.0265769	2673000	2674000	2717000	2718000	9	1	AT4G05180,AT4G05190,AT4G05200	NA
Chr5	15770000	15771000	Chr5	15814000	15815000	45000	4.65321	10	1.4047e-05	0.00704301	15770000	15771000	15814000	15815000	10	1	AT5G39400,AT5G39410,AT5G39420,AT5G39430	AT5G39490,AT5G39493
Chr5	18352000	18353000	Chr5	18396000	18397000	45000	4.65321	9	9.37866e-05	0.0361342	18352000	18353000	18396000	18397000	9	1	AT5G45290	AT5G45390
Chr5	18181000	18182000	Chr5	18225000	18226000	45000	4.65321	10	5.32524e-06	0.00301154	18181000	18182000	18225000	18226000	10	1	AT5G45030,AT5G45040,AT5G45050	AT5G45105
Chr5	9820000	9821000	Chr5	9864000	9865000	45000	4.65321	9	3.64195e-05	0.0160895	9820000	9821000	9864000	9865000	9	1	AT5G27730	AT5G27840
Chr1	17012000	17013000	Chr1	17055000	17056000	44000	4.64345	13	1.35379e-07	0.000110732	17012000	17013000	17055000	17056000	13	1	NA	NA
Chr1	20396000	20397000	Chr1	20439000	20440000	44000	4.64345	9	0.000133089	0.0482847	20396000	20397000	20439000	20440000	9	1	AT1G54610	AT1G54775,AT1G54780
Chr1	11480000	11481000	Chr1	11523000	11524000	44000	4.64345	9	5.03852e-05	0.0212384	11480000	11481000	11523000	11524000	9	1	AT1G31970	AT1G32020,AT1G32030
Chr1	17644000	17645000	Chr1	17687000	17688000	44000	4.64345	10	9.97672e-05	0.0380258	17644000	17645000	17687000	17688000	10	1	AT1G47885,AT1G47890	AT1G47970
Chr2	798000	799000	Chr2	841000	842000	44000	4.64345	9	5.20761e-05	0.0218563	798000	799000	841000	842000	9	1	AT2G02800	AT2G02860,AT2G02870,AT2G02880
Chr2	1538000	1539000	Chr2	1581000	1582000	44000	4.64345	9	0.000136511	0.0493478	1538000	1539000	1581000	1582000	9	1	AT2G04425,AT2G04430	AT2G04540
Chr3	5644000	5645000	Chr3	5687000	5688000	44000	4.64345	9	8.09696e-05	0.0318413	5644000	5645000	5687000	5688000	9	1	AT3G16560,AT3G16565,AT3G16570	AT3G16700
Chr3	5547000	5548000	Chr3	5590000	5591000	44000	4.64345	10	7.635e-05	0.0303052	5547000	5548000	5590000	5591000	10	1	AT3G16350	AT3G16450
Chr4	1888000	1889000	Chr4	1931000	1932000	44000	4.64345	14	2.16208e-08	2.05137e-05	1887000	1889000	1931000	1933000	37	0.75	AT4G03960	NA
Chr4	709000	710000	Chr4	752000	753000	44000	4.64345	10	4.55484e-05	0.0194901	709000	710000	752000	753000	10	1	AT4G01660	AT4G01730,AT4G01735
Chr4	3966000	3967000	Chr4	4009000	4010000	44000	4.64345	14	2.55651e-18	9.31916e-15	3966000	3967000	4009000	4010000	14	1	NA	NA
Chr4	5931000	5932000	Chr4	5974000	5975000	44000	4.64345	11	2.00776e-06	0.00126211	5931000	5932000	5974000	5975000	11	1	AT4G09350	AT4G09430,AT4G09432
Chr4	11345000	11346000	Chr4	11388000	11389000	44000	4.64345	11	1.36889e-05	0.0068849	11345000	11346000	11388000	11389000	11	1	AT4G21323,AT4G21326	AT4G21380
Chr5	17946000	17947000	Chr5	17989000	17990000	44000	4.64345	8	0.000126516	0.0462508	17946000	17947000	17989000	17990000	8	1	AT5G44530,AT5G44540,AT5G44550,AT5G44560,AT5G44562	AT5G44590,AT5G44600
Chr5	15060000	15061000	Chr5	15103000	15104000	44000	4.64345	12	3.4026e-06	0.00202374	15060000	15061000	15103000	15104000	12	1	AT5G37830,AT5G37840	AT5G37930,AT5G37940
Chr5	13591000	13592000	Chr5	13634000	13635000	44000	4.64345	13	3.70324e-08	3.36457e-05	13591000	13592000	13634000	13635000	13	1	AT5G35370	AT5G35410
Chr5	13612000	13613000	Chr5	13655000	13656000	44000	4.64345	9	5.93134e-05	0.0244515	13612000	13613000	13655000	13656000	9	1	NA	NA
Chr1	4879000	4880000	Chr1	4921000	4922000	43000	4.63347	11	1.78518e-05	0.00867853	4879000	4880000	4921000	4922000	11	1	AT1G14260,AT1G14270,AT1G14280	AT1G14380
Chr1	13811000	13812000	Chr1	13853000	13854000	43000	4.63347	12	3.30515e-07	0.000249067	13811000	13812000	13853000	13854000	12	1	AT1G36580	AT1G36640
Chr1	13075000	13076000	Chr1	13117000	13118000	43000	4.63347	9	0.000130902	0.0475924	13075000	13076000	13117000	13118000	9	1	NA	AT1G35560
Chr2	5008000	5009000	Chr2	5050000	5051000	43000	4.63347	13	6.34864e-09	6.64463e-06	5007000	5009000	5049000	5054000	97	1	AT2G12400,AT2G12405	AT2G12461,AT2G12462
Chr2	5864000	5865000	Chr2	5906000	5907000	43000	4.63347	11	4.2802e-06	0.00248082	5864000	5866000	5906000	5907000	22	1	NA	AT2G14045
Chr2	6304000	6305000	Chr2	6346000	6347000	43000	4.63347	11	3.97327e-06	0.00232422	6303000	6305000	6346000	6347000	21	1	AT2G14700,AT2G14710,AT2G14720	NA
Chr2	1800000	1801000	Chr2	1842000	1843000	43000	4.63347	8	5.86102e-05	0.0242049	1800000	1801000	1842000	1843000	8	1	AT2G05070	AT2G05120
Chr2	5981000	5982000	Chr2	6023000	6024000	43000	4.63347	10	2.16723e-05	0.0102775	5981000	5982000	6023000	6024000	10	1	AT2G14170	AT2G14210
Chr2	632000	633000	Chr2	674000	675000	43000	4.63347	10	0.000103144	0.0390848	632000	633000	674000	675000	10	1	AT2G02400,AT2G02410	AT2G02510,AT2G02515,AT2G02520
Chr2	7218000	7219000	Chr2	7260000	7261000	43000	4.63347	15	6.3039e-09	6.60135e-06	7218000	7219000	7260000	7261000	15	1	AT2G16650,AT2G16660	AT2G16730
Chr2	1780000	1781000	Chr2	1822000	1823000	43000	4.63347	10	6.34737e-05	0.0258745	1780000	1781000	1822000	1823000	10	1	NA	NA
Chr3	11165000	11166000	Chr3	11207000	11208000	43000	4.63347	12	1.21321e-06	0.000804872	11165000	11166000	11207000	11208000	12	1	AT3G29200	AT3G29255
Chr3	11006000	11007000	Chr3	11048000	11049000	43000	4.63347	10	0.000103453	0.0391846	11006000	11007000	11048000	11049000	10	1	AT3G28990,AT3G29000,AT3G29010,AT3G29020	AT3G29060
Chr3	11482000	11483000	Chr3	11524000	11525000	43000	4.63347	10	2.16792e-05	0.0102801	11482000	11483000	11524000	11525000	10	1	AT3G29638,AT3G29639	NA
Chr4	9726000	9727000	Chr4	9768000	9769000	43000	4.63347	14	1.50923e-08	1.47701e-05	9726000	9728000	9767000	9769000	38	0.75	AT4G17430	AT4G17510
Chr4	6722000	6723000	Chr4	6764000	6765000	43000	4.63347	10	2.83134e-05	0.012943	6722000	6723000	6764000	6765000	10	1	AT4G10970	AT4G11090
Chr4	2325000	2326000	Chr4	2367000	2368000	43000	4.63347	14	2.92752e-09	3.23194e-06	2325000	2326000	2367000	2368000	14	1	AT4G04610	AT4G04670
Chr4	14423000	14424000	Chr4	14465000	14466000	43000	4.63347	11	4.9128e-05	0.0207978	14423000	14424000	14465000	14466000	11	1	AT4G29260,AT4G29270,AT4G29273,AT4G29280,AT4G29283	AT4G29390
Chr4	5252000	5253000	Chr4	5294000	5295000	43000	4.63347	12	8.95639e-07	0.000615241	5252000	5253000	5294000	5295000	12	1	AT4G08300,AT4G08310,AT4G08320	AT4G08351,AT4G08360
Chr4	7011000	7012000	Chr4	7053000	7054000	43000	4.63347	12	3.14804e-06	0.00188677	7011000	7012000	7053000	7054000	12	1	AT4G11600	AT4G11670,AT4G11680
Chr4	2330000	2331000	Chr4	2372000	2373000	43000	4.63347	12	1.9362e-06	0.00122137	2330000	2331000	2372000	2373000	12	1	AT4G04620	AT4G04670,AT4G04680
Chr4	711000	712000	Chr4	753000	754000	43000	4.63347	10	4.47082e-05	0.0191728	711000	712000	753000	754000	10	1	AT4G01660,AT4G01670	AT4G01740
Chr4	3968000	3969000	Chr4	4010000	4011000	43000	4.63347	5	2.78439e-05	0.0127561	3968000	3969000	4010000	4011000	5	1	NA	NA
Chr5	19422000	19423000	Chr5	19464000	19465000	43000	4.63347	12	1.10871e-06	0.000743219	19422000	19423000	19464000	19465000	12	1	AT5G47950,AT5G47960,AT5G47970,AT5G47980	AT5G48020
Chr1	15609000	15610000	Chr1	15650000	15651000	42000	4.62325	24	2.37933e-17	7.71159e-14	15602000	15610000	15650000	15652000	155	0.6875	NA	AT1G41875
Chr1	7334000	7335000	Chr1	7375000	7376000	42000	4.62325	10	0.000111247	0.0416017	7334000	7335000	7375000	7376000	10	1	AT1G20990	AT1G21065,AT1G21070
Chr1	5048000	5049000	Chr1	5089000	5090000	42000	4.62325	9	7.847e-05	0.0310074	5048000	5049000	5089000	5090000	9	1	AT1G14686,AT1G14687,AT1G14688,AT1G14690	AT1G14755,AT1G14760,AT1G14770,AT1G14780,AT1G14790
Chr2	5074000	5075000	Chr2	5115000	5116000	42000	4.62325	12	4.46264e-07	0.000327222	5073000	5075000	5114000	5116000	23	0.5	AT2G12475,AT2G12480	AT2G12550,AT2G12557
Chr2	4100000	4101000	Chr2	4141000	4142000	42000	4.62325	9	2.68648e-05	0.0123592	4100000	4101000	4141000	4142000	9	1	AT2G10550,AT2G10557,AT2G10560	NA
Chr3	11011000	11012000	Chr3	11052000	11053000	42000	4.62325	11	4.25981e-05	0.0183902	11011000	11012000	11052000	11053000	11	1	AT3G29030	AT3G29075
Chr3	7844000	7845000	Chr3	7885000	7886000	42000	4.62325	18	5.15138e-10	6.43228e-07	7844000	7845000	7885000	7886000	18	1	AT3G22230,AT3G22231	AT3G22290,AT3G22300
Chr4	2620000	2621000	Chr4	2661000	2662000	42000	4.62325	11	2.9211e-06	0.00176491	2620000	2621000	2660000	2662000	20	1	NA	AT4G05150
Chr5	9629000	9630000	Chr5	9670000	9671000	42000	4.62325	17	1.29876e-10	1.78436e-07	9628000	9630000	9670000	9671000	28	1	AT5G27310,AT5G27320	AT5G27380,AT5G27395
Chr5	9943000	9944000	Chr5	9984000	9985000	42000	4.62325	10	4.02938e-05	0.0175478	9943000	9944000	9984000	9985000	10	1	AT5G27910,AT5G27920	AT5G27950
Chr1	21939000	21940000	Chr1	21979000	21980000	41000	4.61278	10	1.04629e-05	0.00546212	21938000	21940000	21979000	21980000	19	1	AT1G59710,AT1G59720	AT1G59750,AT1G59760
Chr1	16836000	16837000	Chr1	16876000	16877000	41000	4.61278	9	3.10516e-05	0.0140029	16836000	16837000	16876000	16877000	9	1	AT1G44350	AT1G44608
Chr1	9246000	9247000	Chr1	9286000	9287000	41000	4.61278	11	9.51375e-06	0.00502498	9246000	9247000	9286000	9287000	11	1	AT1G26740,AT1G26750,AT1G26760,AT1G26761,AT1G26762	AT1G26800,AT1G26810,AT1G26815,AT1G26820,AT1G26830
Chr1	12542000	12543000	Chr1	12582000	12583000	41000	4.61278	14	6.38039e-08	5.53002e-05	12542000	12543000	12582000	12583000	14	1	AT1G34355,AT1G34360	AT1G34410,AT1G34418,AT1G34419
Chr1	10212000	10213000	Chr1	10252000	10253000	41000	4.61278	14	5.04786e-07	0.000365446	10212000	10213000	10252000	10253000	14	1	AT1G29200,AT1G29220,AT1G29230	AT1G29310,AT1G29320
Chr2	19090000	19091000	Chr2	19130000	19131000	41000	4.61278	11	4.83107e-05	0.0204995	19090000	19091000	19130000	19131000	11	1	AT2G46505,AT2G46510	AT2G46580
Chr2	8535000	8536000	Chr2	8575000	8576000	41000	4.61278	9	7.4631e-05	0.0297291	8535000	8536000	8575000	8576000	9	1	NA	AT2G19870
Chr2	801000	802000	Chr2	841000	842000	41000	4.61278	9	9.66828e-05	0.0370554	801000	802000	841000	842000	9	1	AT2G02810	AT2G02860,AT2G02870,AT2G02880
Chr2	901000	902000	Chr2	941000	942000	41000	4.61278	10	1.45807e-05	0.00727393	901000	902000	941000	942000	10	1	AT2G03060	AT2G03130,AT2G03140
Chr2	7220000	7221000	Chr2	7260000	7261000	41000	4.61278	9	9.9926e-05	0.0380657	7220000	7221000	7260000	7261000	9	1	AT2G16660	AT2G16730
Chr3	13489000	13490000	Chr3	13529000	13530000	41000	4.61278	11	1.94425e-06	0.00122575	13489000	13490000	13529000	13530000	11	1	AT3G32920,AT3G32930	AT3G32980
Chr3	17525000	17526000	Chr3	17565000	17566000	41000	4.61278	11	7.24487e-05	0.0289771	17525000	17526000	17565000	17566000	11	1	AT3G47550,AT3G47560	AT3G47630
Chr3	18049000	18050000	Chr3	18089000	18090000	41000	4.61278	13	6.2018e-07	0.000440778	18049000	18050000	18089000	18090000	13	1	AT3G48720,AT3G48730	AT3G48780
Chr4	5923000	5924000	Chr4	5963000	5964000	41000	4.61278	12	6.52659e-07	0.000461752	5923000	5924000	5963000	5964000	12	1	AT4G09320	AT4G09420
Chr4	5669000	5670000	Chr4	5709000	5710000	41000	4.61278	15	1.87164e-09	2.1307e-06	5669000	5670000	5709000	5710000	15	1	AT4G08868,AT4G08874,AT4G08875	AT4G08910
Chr5	10030000	10031000	Chr5	10070000	10071000	41000	4.61278	17	6.32914e-11	9.12335e-08	10030000	10032000	10069000	10071000	38	0.75	AT5G28030	AT5G28060
Chr5	17026000	17027000	Chr5	17066000	17067000	41000	4.61278	17	2.22957e-10	2.95377e-07	17026000	17028000	17066000	17067000	27	1	AT5G42590,AT5G42591	AT5G42600,AT5G42610,AT5G42620
Chr1	17519000	17520000	Chr1	17558000	17559000	40000	4.60206	10	0.00010221	0.038792	17519000	17520000	17558000	17559000	10	1	AT1G47640	AT1G47710
Chr1	16231000	16232000	Chr1	16270000	16271000	40000	4.60206	14	1.03041e-08	1.03767e-05	16231000	16232000	16270000	16271000	14	1	AT1G43130	AT1G43171
Chr1	17013000	17014000	Chr1	17052000	17053000	40000	4.60206	10	1.23908e-05	0.00632501	17013000	17014000	17052000	17053000	10	1	AT1G45010	AT1G45100,AT1G45110
Chr1	11193000	11194000	Chr1	11232000	11233000	40000	4.60206	10	7.91379e-05	0.0312279	11193000	11194000	11232000	11233000	10	1	AT1G31300	AT1G31360
Chr2	13218000	13219000	Chr2	13257000	13258000	40000	4.60206	11	1.2652e-05	0.00644019	13218000	13219000	13257000	13258000	11	1	AT2G31060	AT2G31100,AT2G31110
Chr2	1788000	1789000	Chr2	1827000	1828000	40000	4.60206	12	2.3174e-08	2.1854e-05	1788000	1789000	1827000	1828000	12	1	NA	NA
Chr3	15704000	15705000	Chr3	15743000	15744000	40000	4.60206	10	6.6778e-06	0.00367357	15704000	15705000	15743000	15744000	10	1	AT3G43850,AT3G43860	AT3G43880,AT3G43890,AT3G43900,AT3G43910,AT3G43920
Chr4	2328000	2329000	Chr4	2367000	2368000	40000	4.60206	27	1.74998e-22	9.85994e-19	2328000	2331000	2367000	2368000	71	1	AT4G04614,AT4G04620	AT4G04670
Chr5	20795000	20796000	Chr5	20834000	20835000	40000	4.60206	13	3.55572e-07	0.000266067	20795000	20797000	20833000	20835000	24	0.5	AT5G51170,AT5G51174	AT5G51270
Chr5	15475000	15476000	Chr5	15514000	15515000	40000	4.60206	12	3.09366e-07	0.000234769	15475000	15476000	15513000	15515000	23	1	AT5G38660,AT5G38670	AT5G38740
Chr5	22110000	22111000	Chr5	22149000	22150000	40000	4.60206	12	9.89016e-06	0.00520048	22110000	22111000	22149000	22150000	12	1	AT5G54450,AT5G54460	AT5G54520
Chr5	20900000	20901000	Chr5	20939000	20940000	40000	4.60206	10	1.60585e-05	0.00790856	20900000	20901000	20939000	20940000	10	1	AT5G51451,AT5G51460	AT5G51550
Chr5	19164000	19165000	Chr5	19203000	19204000	40000	4.60206	13	8.8906e-07	0.000611316	19164000	19165000	19203000	19204000	13	1	AT5G47190	AT5G47320,AT5G47330
Chr5	13595000	13596000	Chr5	13634000	13635000	40000	4.60206	11	2.24797e-05	0.010608	13595000	13596000	13634000	13635000	11	1	AT5G35380,AT5G35390	AT5G35410
Chr5	17066000	17067000	Chr5	17105000	17106000	40000	4.60206	16	9.46844e-09	9.5985e-06	17066000	17067000	17105000	17106000	16	1	AT5G42600,AT5G42610,AT5G42620	AT5G42660
Chr5	1656000	1657000	Chr5	1695000	1696000	40000	4.60206	10	6.37626e-05	0.02598	1656000	1657000	1695000	1696000	10	1	AT5G05570	AT5G05660,AT5G05670
Chr1	13078000	13079000	Chr1	13116000	13117000	39000	4.59106	10	7.32207e-05	0.0292482	13078000	13079000	13116000	13117000	10	1	AT1G35515,AT1G35516	AT1G35540,AT1G35545,AT1G35550,AT1G35560
Chr1	24648000	24649000	Chr1	24686000	24687000	39000	4.59106	12	7.87761e-06	0.00425179	24648000	24649000	24686000	24687000	12	1	AT1G66180	AT1G66240
Chr1	17649000	17650000	Chr1	17687000	17688000	39000	4.59106	10	0.000103695	0.0392612	17649000	17650000	17687000	17688000	10	1	AT1G47900	AT1G47970
Chr1	7336000	7337000	Chr1	7374000	7375000	39000	4.59106	10	3.31894e-05	0.0148293	7336000	7337000	7374000	7375000	10	1	NA	AT1G21060,AT1G21065
Chr1	16228000	16229000	Chr1	16266000	16267000	39000	4.59106	11	5.44992e-06	0.00307466	16228000	16229000	16266000	16267000	11	1	AT1G43090,AT1G43100,AT1G43130	AT1G43170
Chr1	26362000	26363000	Chr1	26400000	26401000	39000	4.59106	13	1.18647e-05	0.0060933	26362000	26363000	26400000	26401000	13	1	AT1G69990	AT1G70080,AT1G70090
Chr2	12178000	12179000	Chr2	12216000	12217000	39000	4.59106	17	3.61887e-09	3.94698e-06	12178000	12179000	12215000	12217000	28	1	AT2G28470,AT2G28480,AT2G28490	NA
Chr2	1800000	1801000	Chr2	1838000	1839000	39000	4.59106	8	3.41932e-05	0.0152192	1800000	1801000	1838000	1839000	8	1	AT2G05070	AT2G05117
Chr2	286000	287000	Chr2	324000	325000	39000	4.59106	14	6.32933e-07	0.000449145	286000	287000	324000	325000	14	1	AT2G01650	AT2G01735
Chr2	6308000	6309000	Chr2	6346000	6347000	39000	4.59106	11	5.14298e-06	0.002921	6308000	6309000	6346000	6347000	11	1	AT2G14740	NA
Chr2	10059000	10060000	Chr2	10097000	10098000	39000	4.59106	13	1.02793e-06	0.000695427	10059000	10060000	10097000	10098000	13	1	AT2G23630,AT2G23640,AT2G23650	AT2G23740
Chr3	15367000	15368000	Chr3	15405000	15406000	39000	4.59106	9	3.54697e-05	0.0157208	15367000	15369000	15405000	15407000	27	0.75	AT3G43440	AT3G43490,AT3G43500,AT3G43505
Chr3	6525000	6526000	Chr3	6563000	6564000	39000	4.59106	11	5.17522e-05	0.0217391	6525000	6526000	6563000	6564000	11	1	AT3G18930	AT3G19020,AT3G19030
Chr3	1941000	1942000	Chr3	1979000	1980000	39000	4.59106	12	3.61879e-07	0.000270266	1941000	1942000	1979000	1980000	12	1	AT3G06400	AT3G06450
Chr3	14879000	14880000	Chr3	14917000	14918000	39000	4.59106	16	3.95446e-10	5.04468e-07	14879000	14880000	14917000	14918000	16	1	AT3G42790	AT3G42800
Chr3	17527000	17528000	Chr3	17565000	17566000	39000	4.59106	12	1.8925e-05	0.0091272	17527000	17528000	17565000	17566000	12	1	AT3G47560,AT3G47570	AT3G47630
Chr4	4828000	4829000	Chr4	4866000	4867000	39000	4.59106	12	1.38013e-08	1.36025e-05	4827000	4829000	4866000	4867000	20	1	AT4G07990	AT4G08035
Chr4	11842000	11843000	Chr4	11880000	11881000	39000	4.59106	13	5.42461e-07	0.000390067	11842000	11843000	11880000	11881000	13	1	AT4G22440,AT4G22460,AT4G22470,AT4G22485,AT4G22490	AT4G22560
Chr4	2525000	2526000	Chr4	2563000	2564000	39000	4.59106	12	2.88041e-06	0.00174276	2525000	2526000	2563000	2564000	12	1	AT4G04955,AT4G04957	AT4G04990,AT4G05000
Chr4	14081000	14082000	Chr4	14119000	14120000	39000	4.59106	12	1.38577e-05	0.00695961	14081000	14082000	14119000	14120000	12	1	AT4G28490,AT4G28500	AT4G28556,AT4G28560,AT4G28564,AT4G28570
Chr4	5927000	5928000	Chr4	5965000	5966000	39000	4.59106	12	1.00592e-05	0.00527757	5927000	5928000	5965000	5966000	12	1	AT4G09340	NA
Chr4	34000	35000	Chr4	72000	73000	39000	4.59106	12	3.80309e-06	0.00223426	34000	35000	72000	73000	12	1	AT4G00090	AT4G00170,AT4G00180
Chr5	24623000	24624000	Chr5	24661000	24662000	39000	4.59106	11	3.29714e-05	0.0147514	24623000	24624000	24661000	24662000	11	1	AT5G61210	AT5G61330
Chr5	15065000	15066000	Chr5	15103000	15104000	39000	4.59106	9	7.07897e-05	0.0284144	15065000	15066000	15103000	15104000	9	1	AT5G37850	AT5G37930,AT5G37940
Chr5	17951000	17952000	Chr5	17989000	17990000	39000	4.59106	14	1.30615e-07	0.000107005	17951000	17952000	17989000	17990000	14	1	AT5G44565	AT5G44590,AT5G44600
Chr1	22749000	22750000	Chr1	22786000	22787000	38000	4.57978	10	2.41943e-05	0.0112984	22749000	22750000	22786000	22787000	10	1	AT1G61630,AT1G61640,AT1G61660	AT1G61688,AT1G61690,AT1G61700,AT1G61710,AT1G61720
Chr1	27027000	27028000	Chr1	27064000	27065000	38000	4.57978	10	2.49176e-05	0.0115834	27027000	27028000	27064000	27065000	10	1	AT1G71860	AT1G71900,AT1G71910
Chr1	5997000	5998000	Chr1	6034000	6035000	38000	4.57978	16	6.18997e-08	5.38117e-05	5997000	5998000	6034000	6035000	16	1	AT1G17455	AT1G17545,AT1G17550
Chr1	21425000	21426000	Chr1	21462000	21463000	38000	4.57978	10	0.000104156	0.039401	21425000	21426000	21462000	21463000	10	1	AT1G57820,AT1G57830,AT1G57835,AT1G57850	AT1G58025
Chr1	12650000	12651000	Chr1	12687000	12688000	38000	4.57978	12	3.04707e-06	0.00183247	12650000	12651000	12687000	12688000	12	1	AT1G34550	AT1G34630,AT1G34640
Chr2	6946000	6947000	Chr2	6983000	6984000	38000	4.57978	12	1.57954e-06	0.00101761	6946000	6948000	6983000	6984000	24	1	AT2G15930,AT2G15950	AT2G16018,AT2G16019,AT2G16020,AT2G16030,AT2G16040,AT2G16050,AT2G16060,AT2G16070,AT2G16090
Chr2	12712000	12713000	Chr2	12749000	12750000	38000	4.57978	14	1.81532e-06	0.00115241	12712000	12713000	12749000	12750000	14	1	AT2G29760	AT2G29870,AT2G29880,AT2G29890,AT2G29900
Chr2	16350000	16351000	Chr2	16387000	16388000	38000	4.57978	10	4.68042e-05	0.0199484	16350000	16351000	16387000	16388000	10	1	AT2G39190	AT2G39240
Chr2	360000	361000	Chr2	397000	398000	38000	4.57978	11	1.92596e-05	0.00927055	360000	361000	397000	398000	11	1	AT2G01820	AT2G01890
Chr2	1122000	1123000	Chr2	1159000	1160000	38000	4.57978	11	0.000102756	0.0389644	1122000	1123000	1159000	1160000	11	1	AT2G03680,AT2G03690	NA
Chr2	7462000	7463000	Chr2	7499000	7500000	38000	4.57978	14	3.10686e-08	2.86118e-05	7462000	7463000	7499000	7500000	14	1	AT2G17130,AT2G17140	AT2G17240,AT2G17250
Chr3	19841000	19842000	Chr3	19878000	19879000	38000	4.57978	12	3.91204e-05	0.0171067	19841000	19842000	19878000	19879000	12	1	AT3G53520	AT3G53610,AT3G53611
Chr3	15607000	15608000	Chr3	15644000	15645000	38000	4.57978	8	0.000129506	0.0471729	15607000	15608000	15644000	15645000	8	1	AT3G43710	AT3G43740
Chr4	7391000	7392000	Chr4	7428000	7429000	38000	4.57978	9	8.00875e-05	0.0315471	7391000	7392000	7428000	7429000	9	1	AT4G12460	AT4G12530,AT4G12540,AT4G12545
Chr4	13267000	13268000	Chr4	13304000	13305000	38000	4.57978	12	2.01816e-06	0.00126834	13267000	13268000	13304000	13305000	12	1	NA	AT4G26260,AT4G26270,AT4G26280
Chr4	5709000	5710000	Chr4	5746000	5747000	38000	4.57978	15	5.80363e-07	0.000415136	5709000	5710000	5746000	5747000	15	1	AT4G08910	AT4G08960
Chr4	15275000	15276000	Chr4	15312000	15313000	38000	4.57978	10	0.000123805	0.045392	15275000	15276000	15312000	15313000	10	1	AT4G31500	AT4G31590
Chr5	14198000	14199000	Chr5	14235000	14236000	38000	4.57978	10	1.39441e-05	0.00699593	14198000	14199000	14234000	14236000	19	1	AT5G36100,AT5G36110,AT5G36120	AT5G36160,AT5G36170
Chr5	2372000	2373000	Chr5	2409000	2410000	38000	4.57978	12	6.94874e-06	0.00380057	2372000	2373000	2409000	2410000	12	1	AT5G07490,AT5G07500,AT5G07510,AT5G07520	AT5G07620
Chr1	16231000	16232000	Chr1	16267000	16268000	37000	4.5682	14	7.21523e-09	7.47017e-06	16230000	16232000	16264000	16269000	113	0.7	AT1G43130	AT1G43170
Chr1	16581000	16582000	Chr1	16617000	16618000	37000	4.5682	11	4.41125e-06	0.00254803	16580000	16582000	16617000	16618000	21	1	AT1G43790,AT1G43800,AT1G43810,AT1G43820	AT1G43850
Chr1	16852000	16853000	Chr1	16888000	16889000	37000	4.5682	9	3.58826e-05	0.015883	16852000	16853000	16888000	16889000	9	1	AT1G44478	AT1G44740
Chr1	16652000	16653000	Chr1	16688000	16689000	37000	4.5682	10	7.99025e-06	0.0043057	16652000	16653000	16688000	16689000	10	1	NA	AT1G43980
Chr1	11487000	11488000	Chr1	11523000	11524000	37000	4.5682	10	1.93523e-06	0.00122096	11487000	11488000	11523000	11524000	10	1	NA	AT1G32020,AT1G32030
Chr1	13497000	13498000	Chr1	13533000	13534000	37000	4.5682	9	3.03813e-05	0.0137492	13497000	13498000	13533000	13534000	9	1	AT1G36095,AT1G36100	AT1G36150,AT1G36160
Chr1	27029000	27030000	Chr1	27065000	27066000	37000	4.5682	15	2.22426e-07	0.000173988	27029000	27030000	27065000	27066000	15	1	AT1G71860,AT1G71865,AT1G71866	AT1G71910,AT1G71920
Chr2	901000	902000	Chr2	937000	938000	37000	4.5682	20	2.94262e-12	5.10028e-09	900000	902000	936000	938000	45	0.75	AT2G03060	AT2G03120
Chr2	9390000	9391000	Chr2	9426000	9427000	37000	4.5682	12	8.81075e-06	0.00468935	9390000	9391000	9426000	9427000	12	1	AT2G22090	AT2G22155,AT2G22160,AT2G22170
Chr2	1066000	1067000	Chr2	1102000	1103000	37000	4.5682	12	1.57934e-05	0.00779729	1066000	1067000	1102000	1103000	12	1	AT2G03500,AT2G03505,AT2G03510	AT2G03610,AT2G03620,AT2G03630
Chr2	9354000	9355000	Chr2	9390000	9391000	37000	4.5682	11	8.17758e-05	0.0321113	9354000	9355000	9390000	9391000	11	1	AT2G21950,AT2G21960	AT2G22090
Chr2	9677000	9678000	Chr2	9713000	9714000	37000	4.5682	10	2.00875e-05	0.00961864	9677000	9678000	9713000	9714000	10	1	AT2G22760	AT2G22805,AT2G22807
Chr2	2180000	2181000	Chr2	2216000	2217000	37000	4.5682	9	0.000108618	0.0408024	2180000	2181000	2216000	2217000	9	1	AT2G05760	AT2G05810,AT2G05812
Chr2	101000	102000	Chr2	137000	138000	37000	4.5682	9	0.000133699	0.0484778	101000	102000	137000	138000	9	1	AT2G01150,AT2G01160,AT2G01170	AT2G01260
Chr3	7844000	7845000	Chr3	7880000	7881000	37000	4.5682	13	3.1818e-06	0.0019051	7844000	7845000	7878000	7881000	39	1	AT3G22230,AT3G22231	AT3G22275
Chr3	13493000	13494000	Chr3	13529000	13530000	37000	4.5682	9	4.29096e-05	0.0185046	13493000	13494000	13528000	13530000	18	1	AT3G32940,AT3G32960	AT3G32980
Chr3	16584000	16585000	Chr3	16620000	16621000	37000	4.5682	17	2.92516e-09	3.23014e-06	16584000	16585000	16620000	16622000	32	1	AT3G45248,AT3G45252	AT3G45290,AT3G45300
Chr3	9676000	9677000	Chr3	9712000	9713000	37000	4.5682	10	2.54277e-05	0.0117967	9676000	9677000	9712000	9713000	10	1	AT3G26420,AT3G26440	AT3G26510,AT3G26511
Chr3	16122000	16123000	Chr3	16158000	16159000	37000	4.5682	11	1.66011e-06	0.00106396	16122000	16123000	16158000	16159000	11	1	AT3G44530,AT3G44540	AT3G44570,AT3G44580
Chr3	16588000	16589000	Chr3	16624000	16625000	37000	4.5682	10	3.75942e-05	0.0165276	16588000	16589000	16624000	16625000	10	1	NA	AT3G45300
Chr3	17087000	17088000	Chr3	17123000	17124000	37000	4.5682	13	1.46821e-06	0.000953864	17087000	17088000	17123000	17124000	13	1	AT3G46410,AT3G46420,AT3G46430	AT3G46490,AT3G46500,AT3G46510
Chr3	10924000	10925000	Chr3	10960000	10961000	37000	4.5682	13	1.40596e-07	0.000114707	10924000	10925000	10960000	10961000	13	1	AT3G28917	AT3G28925,AT3G28930
Chr3	8575000	8576000	Chr3	8611000	8612000	37000	4.5682	9	8.93331e-05	0.034657	8575000	8576000	8611000	8612000	9	1	AT3G23780,AT3G23790	AT3G23840
Chr4	5927000	5928000	Chr4	5963000	5964000	37000	4.5682	15	2.78957e-08	2.5948e-05	5926000	5928000	5962000	5964000	33	0.75	AT4G09340	AT4G09420
Chr4	592000	593000	Chr4	628000	629000	37000	4.5682	10	1.95289e-05	0.00938352	592000	593000	628000	629000	10	1	NA	AT4G01480
Chr4	10884000	10885000	Chr4	10920000	10921000	37000	4.5682	12	1.62409e-05	0.00799029	10884000	10885000	10920000	10921000	12	1	AT4G20140	AT4G20210,AT4G20220,AT4G20230
Chr4	13787000	13788000	Chr4	13823000	13824000	37000	4.5682	9	5.66575e-05	0.0235151	13787000	13788000	13823000	13824000	9	1	AT4G27610	AT4G27680,AT4G27690
Chr5	10034000	10035000	Chr5	10070000	10071000	37000	4.5682	11	6.32628e-06	0.00350175	10033000	10035000	10070000	10071000	21	1	NA	AT5G28060
Chr5	54000	55000	Chr5	90000	91000	37000	4.5682	12	2.72186e-06	0.0016573	54000	55000	90000	91000	12	1	AT5G01160	AT5G01225
Chr5	6378000	6379000	Chr5	6414000	6415000	37000	4.5682	11	4.15505e-05	0.0180084	6378000	6379000	6414000	6415000	11	1	AT5G19080	AT5G19120
Chr5	1632000	1633000	Chr5	1668000	1669000	37000	4.5682	10	7.91747e-05	0.0312398	1632000	1633000	1668000	1669000	10	1	AT5G05500,AT5G05510,AT5G05520	AT5G05590
Chr5	8382000	8383000	Chr5	8418000	8419000	37000	4.5682	11	1.72436e-05	0.00841599	8382000	8383000	8418000	8419000	11	1	AT5G24530,AT5G24540,AT5G24550	AT5G24590,AT5G24593
Chr5	19164000	19165000	Chr5	19200000	19201000	37000	4.5682	16	4.21908e-09	4.54927e-06	19164000	19165000	19200000	19201000	16	1	AT5G47190	AT5G47290,AT5G47300,AT5G47306,AT5G47310
Chr5	13602000	13603000	Chr5	13638000	13639000	37000	4.5682	12	5.50652e-07	0.000395484	13602000	13603000	13638000	13639000	12	1	AT5G35400	AT5G35410
Chr1	16929000	16930000	Chr1	16964000	16965000	36000	4.5563	24	1.75156e-15	4.55333e-12	16929000	16930000	16963000	16965000	34	1	NA	AT1G44890
Chr1	10678000	10679000	Chr1	10713000	10714000	36000	4.5563	12	1.65279e-05	0.00811867	10678000	10679000	10713000	10714000	12	1	NA	NA
Chr1	26118000	26119000	Chr1	26153000	26154000	36000	4.5563	12	4.59861e-05	0.0196428	26118000	26119000	26153000	26154000	12	1	AT1G69485	AT1G69550
Chr1	12459000	12460000	Chr1	12494000	12495000	36000	4.5563	13	3.04827e-07	0.000231571	12459000	12460000	12494000	12495000	13	1	AT1G34210	AT1G34270,AT1G34280,AT1G34290
Chr1	17397000	17398000	Chr1	17432000	17433000	36000	4.5563	12	1.32771e-06	0.000872203	17397000	17398000	17432000	17433000	12	1	AT1G47420,AT1G47450	AT1G47497,AT1G47500
Chr1	25202000	25203000	Chr1	25237000	25238000	36000	4.5563	12	2.6869e-05	0.0123604	25202000	25203000	25237000	25238000	12	1	AT1G67310	AT1G67360
Chr2	12872000	12873000	Chr2	12907000	12908000	36000	4.5563	14	1.02815e-06	0.000695511	12872000	12873000	12907000	12908000	14	1	AT2G30140	AT2G30260,AT2G30270
Chr2	7221000	7222000	Chr2	7256000	7257000	36000	4.5563	10	0.000131747	0.0478664	7221000	7222000	7256000	7257000	10	1	AT2G16660	AT2G16720
Chr2	15172000	15173000	Chr2	15207000	15208000	36000	4.5563	11	0.000122281	0.044954	15172000	15173000	15207000	15208000	11	1	AT2G36160,AT2G36170,AT2G36180,AT2G36190	AT2G36260,AT2G36261,AT2G36270,AT2G36280,AT2G36290
Chr2	8541000	8542000	Chr2	8576000	8577000	36000	4.5563	12	1.97166e-05	0.00946374	8541000	8542000	8576000	8577000	12	1	NA	AT2G19870
Chr3	15370000	15371000	Chr3	15405000	15406000	36000	4.5563	14	3.1608e-08	2.90775e-05	15370000	15372000	15405000	15407000	33	0.75	AT3G43440	AT3G43490,AT3G43500,AT3G43505
Chr3	23167000	23168000	Chr3	23202000	23203000	36000	4.5563	12	7.74956e-05	0.0306925	23167000	23168000	23202000	23203000	12	1	AT3G62650	AT3G62720
Chr4	6049000	6050000	Chr4	6084000	6085000	36000	4.5563	9	0.000105099	0.0396958	6049000	6050000	6083000	6085000	19	1	AT4G09570	AT4G09630
Chr4	7287000	7288000	Chr4	7322000	7323000	36000	4.5563	13	1.14004e-05	0.00588516	7287000	7288000	7322000	7323000	13	1	AT4G12230,AT4G12240	AT4G12340,AT4G12350
Chr4	5669000	5670000	Chr4	5704000	5705000	36000	4.5563	8	0.000136845	0.0494546	5669000	5670000	5704000	5705000	8	1	AT4G08868,AT4G08874,AT4G08875	AT4G08900
Chr4	2332000	2333000	Chr4	2367000	2368000	36000	4.5563	11	1.15437e-06	0.00077057	2332000	2333000	2367000	2368000	11	1	AT4G04630	AT4G04670
Chr5	17954000	17955000	Chr5	17989000	17990000	36000	4.5563	10	9.33178e-05	0.0359892	17954000	17955000	17989000	17990000	10	1	NA	AT5G44590,AT5G44600
Chr5	19168000	19169000	Chr5	19203000	19204000	36000	4.5563	16	9.68744e-07	0.000659458	19168000	19169000	19203000	19204000	16	1	AT5G47200	AT5G47320,AT5G47330
Chr1	16230000	16231000	Chr1	16264000	16265000	35000	4.54407	23	7.83399e-18	2.71444e-14	16230000	16232000	16264000	16269000	113	0.7	AT1G43130	AT1G43160
Chr1	10513000	10514000	Chr1	10547000	10548000	35000	4.54407	15	1.13225e-09	1.33489e-06	10513000	10517000	10547000	10548000	57	1	AT1G30010	AT1G30070,AT1G30080
Chr1	18950000	18951000	Chr1	18984000	18985000	35000	4.54407	10	5.07242e-05	0.0213662	18950000	18951000	18984000	18985000	10	1	AT1G51160	AT1G51200,AT1G51210,AT1G51220
Chr1	29504000	29505000	Chr1	29538000	29539000	35000	4.54407	11	7.16782e-06	0.00390693	29504000	29505000	29538000	29539000	11	1	AT1G78410,AT1G78420	AT1G78500,AT1G78510,AT1G78520,AT1G78530
Chr1	11489000	11490000	Chr1	11523000	11524000	35000	4.54407	13	1.35886e-06	0.00088981	11489000	11490000	11523000	11524000	13	1	AT1G31990	AT1G32020,AT1G32030
Chr1	11494000	11495000	Chr1	11528000	11529000	35000	4.54407	10	7.40192e-05	0.0295293	11494000	11495000	11528000	11529000	10	1	NA	AT1G32050
Chr2	487000	488000	Chr2	521000	522000	35000	4.54407	11	3.14177e-05	0.0141507	487000	488000	521000	524000	32	1	AT2G02040	AT2G02080
Chr2	587000	588000	Chr2	621000	622000	35000	4.54407	12	3.56052e-05	0.0157745	587000	588000	621000	622000	12	1	AT2G02220	AT2G02320,AT2G02340,AT2G02350,AT2G02360,AT2G02370
Chr2	16539000	16540000	Chr2	16573000	16574000	35000	4.54407	12	4.78039e-05	0.0203133	16539000	16540000	16573000	16574000	12	1	AT2G39675,AT2G39681	AT2G39730,AT2G39740,AT2G39750
Chr2	1359000	1360000	Chr2	1393000	1394000	35000	4.54407	10	4.73796e-05	0.0201594	1359000	1360000	1393000	1394000	10	1	AT2G04063,AT2G04066,AT2G04070,AT2G04080,AT2G04090	NA
Chr2	19447000	19448000	Chr2	19481000	19482000	35000	4.54407	17	3.31967e-09	3.6416e-06	19447000	19448000	19481000	19482000	17	1	AT2G47370,AT2G47380,AT2G47390,AT2G47400	AT2G47470
Chr2	7768000	7769000	Chr2	7802000	7803000	35000	4.54407	10	6.20804e-05	0.0253891	7768000	7769000	7802000	7803000	10	1	AT2G17890,AT2G17900	AT2G17930,AT2G17940
Chr2	632000	633000	Chr2	666000	667000	35000	4.54407	12	9.92596e-06	0.00521472	632000	633000	666000	667000	12	1	AT2G02400,AT2G02410	AT2G02490,AT2G02498
Chr2	2273000	2274000	Chr2	2307000	2308000	35000	4.54407	9	5.11614e-05	0.0215305	2273000	2274000	2307000	2308000	9	1	NA	AT2G05970
Chr2	18061000	18062000	Chr2	18095000	18096000	35000	4.54407	12	3.70723e-06	0.00218305	18061000	18062000	18095000	18096000	12	1	AT2G43500,AT2G43510,AT2G43520	AT2G43620,AT2G43630
Chr3	15567000	15568000	Chr3	15601000	15602000	35000	4.54407	20	2.36848e-12	4.15799e-09	15567000	15569000	15601000	15603000	45	0.75	AT3G43660,AT3G43670	AT3G43700
Chr3	4818000	4819000	Chr3	4852000	4853000	35000	4.54407	11	4.55084e-06	0.00262167	4818000	4819000	4851000	4853000	22	1	AT3G14400,AT3G14410,AT3G14415	AT3G14452,AT3G14460,AT3G14470,AT3G14475,AT3G14480
Chr3	9592000	9593000	Chr3	9626000	9627000	35000	4.54407	9	6.5724e-05	0.0266313	9592000	9593000	9626000	9627000	9	1	AT3G26200,AT3G26210	AT3G26270
Chr3	17388000	17389000	Chr3	17422000	17423000	35000	4.54407	9	0.000106814	0.0402302	17388000	17389000	17422000	17423000	9	1	AT3G47220	AT3G47290
Chr3	15972000	15973000	Chr3	16006000	16007000	35000	4.54407	10	8.42602e-05	0.0329687	15972000	15973000	16006000	16007000	10	1	AT3G44290	AT3G44330
Chr4	17904000	17905000	Chr4	17938000	17939000	35000	4.54407	12	1.62648e-05	0.00800054	17904000	17905000	17938000	17939000	12	1	AT4G38160,AT4G38170	AT4G38260,AT4G38270
Chr4	13002000	13003000	Chr4	13036000	13037000	35000	4.54407	10	3.32045e-05	0.0148339	13002000	13003000	13036000	13037000	10	1	AT4G25420,AT4G25430,AT4G25433	AT4G25520,AT4G25530
Chr4	5931000	5932000	Chr4	5965000	5966000	35000	4.54407	12	3.28701e-06	0.00196256	5931000	5932000	5965000	5966000	12	1	AT4G09350	NA
Chr4	1337000	1338000	Chr4	1371000	1372000	35000	4.54407	11	5.03565e-05	0.0212286	1337000	1338000	1371000	1372000	11	1	AT4G03030,AT4G03038,AT4G03039,AT4G03040,AT4G03050	AT4G03090
Chr5	19167000	19168000	Chr5	19201000	19202000	35000	4.54407	12	5.36173e-06	0.00303063	19167000	19168000	19201000	19202000	12	1	AT5G47200	AT5G47310
Chr5	18525000	18526000	Chr5	18559000	18560000	35000	4.54407	11	5.47443e-05	0.0228234	18525000	18526000	18559000	18560000	11	1	AT5G45660	AT5G45750
Chr5	23275000	23276000	Chr5	23309000	23310000	35000	4.54407	11	2.30917e-05	0.0108579	23275000	23276000	23309000	23310000	11	1	AT5G57450,AT5G57460	NA
Chr1	16233000	16234000	Chr1	16266000	16267000	34000	4.53148	10	1.21552e-06	0.000806061	16233000	16234000	16266000	16267000	10	1	AT1G43140	AT1G43170
Chr1	17654000	17655000	Chr1	17687000	17688000	34000	4.53148	13	1.99038e-05	0.00954303	17654000	17655000	17687000	17688000	13	1	NA	AT1G47970
Chr1	26672000	26673000	Chr1	26705000	26706000	34000	4.53148	13	9.49788e-06	0.00501865	26672000	26673000	26705000	26706000	13	1	AT1G70720,AT1G70730	AT1G70810,AT1G70820
Chr1	17687000	17688000	Chr1	17720000	17721000	34000	4.53148	12	0.000123783	0.0453873	17687000	17688000	17720000	17721000	12	1	AT1G47970	AT1G48040
Chr1	10219000	10220000	Chr1	10252000	10253000	34000	4.53148	12	6.90531e-05	0.0278178	10219000	10220000	10252000	10253000	12	1	AT1G29240	AT1G29310,AT1G29320
Chr1	3881000	3882000	Chr1	3914000	3915000	34000	4.53148	13	3.05896e-05	0.0138274	3881000	3882000	3914000	3915000	13	1	AT1G11550,AT1G11560	AT1G11608,AT1G11610,AT1G11620,AT1G11630,AT1G11640,AT1G11650
Chr2	5508000	5509000	Chr2	5541000	5542000	34000	4.53148	12	2.30907e-06	0.00143252	5508000	5509000	5541000	5544000	34	1	AT2G13273	AT2G13360,AT2G13363
Chr2	15805000	15806000	Chr2	15838000	15839000	34000	4.53148	13	5.47554e-06	0.00308711	15805000	15806000	15838000	15839000	13	1	AT2G37680,AT2G37690	AT2G37740,AT2G37750,AT2G37760,AT2G37770,AT2G37780,AT2G37790,AT2G37800
Chr2	5926000	5927000	Chr2	5959000	5960000	34000	4.53148	13	8.37248e-06	0.00449052	5926000	5927000	5959000	5960000	13	1	AT2G14080	AT2G14120
Chr3	10927000	10928000	Chr3	10960000	10961000	34000	4.53148	18	4.35515e-11	6.43291e-08	10926000	10928000	10960000	10961000	31	1	NA	AT3G28925,AT3G28930
Chr3	17461000	17462000	Chr3	17494000	17495000	34000	4.53148	11	0.000102705	0.0389507	17461000	17462000	17494000	17495000	11	1	AT3G47380,AT3G47390	AT3G47470,AT3G47480
Chr3	10934000	10935000	Chr3	10967000	10968000	34000	4.53148	16	1.19697e-08	1.19304e-05	10934000	10935000	10967000	10968000	16	1	AT3G28918	NA
Chr3	9719000	9720000	Chr3	9752000	9753000	34000	4.53148	12	4.10038e-05	0.0178101	9719000	9720000	9752000	9753000	12	1	NA	AT3G26560
Chr3	15870000	15871000	Chr3	15903000	15904000	34000	4.53148	11	7.44273e-05	0.0296632	15870000	15871000	15903000	15904000	11	1	AT3G44110,AT3G44115,AT3G44120	AT3G44190
Chr3	23098000	23099000	Chr3	23131000	23132000	34000	4.53148	13	8.99884e-07	0.000617829	23098000	23099000	23131000	23132000	13	1	AT3G62450	AT3G62528,AT3G62530,AT3G62540,AT3G62550
Chr3	21758000	21759000	Chr3	21791000	21792000	34000	4.53148	12	9.03485e-05	0.0349899	21758000	21759000	21791000	21792000	12	1	AT3G58840,AT3G58850	AT3G58970
Chr4	13790000	13791000	Chr4	13823000	13824000	34000	4.53148	15	9.34343e-09	9.47891e-06	13790000	13792000	13823000	13824000	29	1	AT4G27620	AT4G27680,AT4G27690
Chr4	13255000	13256000	Chr4	13288000	13289000	34000	4.53148	10	0.000124015	0.0454581	13255000	13256000	13288000	13289000	10	1	AT4G26150,AT4G26160	AT4G26240,AT4G26250,AT4G26255
Chr4	2334000	2335000	Chr4	2367000	2368000	34000	4.53148	10	7.70025e-05	0.0305283	2334000	2335000	2367000	2368000	10	1	NA	AT4G04670
Chr4	2257000	2258000	Chr4	2290000	2291000	34000	4.53148	8	9.97486e-05	0.0380229	2257000	2258000	2290000	2291000	8	1	NA	AT4G04570
Chr4	10920000	10921000	Chr4	10953000	10954000	34000	4.53148	13	1.30572e-05	0.00661758	10920000	10921000	10953000	10954000	13	1	AT4G20210,AT4G20220,AT4G20230	AT4G20270,AT4G20280
Chr5	17951000	17952000	Chr5	17984000	17985000	34000	4.53148	12	2.73877e-05	0.012576	17950000	17952000	17984000	17985000	24	1	AT5G44565	AT5G44585
Chr5	15477000	15478000	Chr5	15510000	15511000	34000	4.53148	9	6.98786e-05	0.0280987	15477000	15478000	15510000	15511000	9	1	AT5G38680	AT5G38720,AT5G38730
Chr5	26239000	26240000	Chr5	26272000	26273000	34000	4.53148	10	7.41974e-05	0.0295897	26239000	26240000	26272000	26273000	10	1	AT5G65640,AT5G65650	AT5G65687
Chr5	6378000	6379000	Chr5	6411000	6412000	34000	4.53148	10	0.00010486	0.0396175	6378000	6379000	6411000	6412000	10	1	AT5G19080	AT5G19110
Chr5	15022000	15023000	Chr5	15055000	15056000	34000	4.53148	15	2.06515e-07	0.000162474	15022000	15023000	15055000	15056000	15	1	NA	AT5G37820
Chr5	26012000	26013000	Chr5	26045000	26046000	34000	4.53148	11	5.72339e-05	0.0237189	26012000	26013000	26045000	26046000	11	1	AT5G65110,AT5G65120	AT5G65180
Chr5	15902000	15903000	Chr5	15935000	15936000	34000	4.53148	10	5.43603e-05	0.0226849	15902000	15903000	15935000	15936000	10	1	AT5G39730	AT5G39790,AT5G39800
Chr5	24894000	24895000	Chr5	24927000	24928000	34000	4.53148	14	8.4553e-08	7.17874e-05	24894000	24895000	24927000	24928000	14	1	AT5G61980	AT5G62050,AT5G62060,AT5G62065
Chr1	12462000	12463000	Chr1	12494000	12495000	33000	4.51851	12	0.000101613	0.0386062	12462000	12463000	12494000	12495000	12	1	AT1G34210,AT1G34220	AT1G34270,AT1G34280,AT1G34290
Chr1	7334000	7335000	Chr1	7366000	7367000	33000	4.51851	19	2.59214e-08	2.42861e-05	7334000	7335000	7366000	7367000	19	1	AT1G20990	AT1G21050
Chr1	12550000	12551000	Chr1	12582000	12583000	33000	4.51851	13	7.49835e-06	0.00406628	12550000	12551000	12582000	12583000	13	1	AT1G34370	AT1G34410,AT1G34418,AT1G34419
Chr1	16999000	17000000	Chr1	17031000	17032000	33000	4.51851	10	1.25851e-05	0.00641076	16999000	17000000	17031000	17032000	10	1	AT1G44940,AT1G44941,AT1G44960	AT1G45050
Chr1	7521000	7522000	Chr1	7553000	7554000	33000	4.51851	11	0.000117597	0.0435098	7521000	7522000	7553000	7554000	11	1	AT1G21470,AT1G21480,AT1G21475	AT1G21550
Chr1	3790000	3791000	Chr1	3822000	3823000	33000	4.51851	15	3.86898e-06	0.00226936	3790000	3791000	3822000	3823000	15	1	AT1G11280	AT1G11360,AT1G11362
Chr1	19996000	19997000	Chr1	20028000	20029000	33000	4.51851	12	1.82565e-05	0.00884375	19996000	19997000	20028000	20029000	12	1	AT1G53590	AT1G53645,AT1G53650
Chr1	11491000	11492000	Chr1	11523000	11524000	33000	4.51851	11	3.85398e-05	0.016889	11491000	11492000	11523000	11524000	11	1	NA	AT1G32020,AT1G32030
Chr1	10212000	10213000	Chr1	10244000	10245000	33000	4.51851	11	6.26217e-05	0.0255762	10212000	10213000	10244000	10245000	11	1	AT1G29200,AT1G29220,AT1G29230	AT1G29290
Chr1	23795000	23796000	Chr1	23827000	23828000	33000	4.51851	13	0.000118441	0.043774	23795000	23796000	23827000	23828000	13	1	AT1G64100,AT1G64105,AT1G64107,AT1G64110,AT1G64120	AT1G64190,AT1G64195,AT1G64200
Chr2	6314000	6315000	Chr2	6346000	6347000	33000	4.51851	25	2.89467e-14	6.48058e-11	6314000	6316000	6345000	6347000	68	1	AT2G14750	NA
Chr2	905000	906000	Chr2	937000	938000	33000	4.51851	11	1.25293e-06	0.000828471	905000	906000	936000	938000	20	1	AT2G03070	AT2G03120
Chr2	1991000	1992000	Chr2	2023000	2024000	33000	4.51851	10	8.68953e-05	0.033843	1991000	1992000	2023000	2024000	10	1	AT2G05420,AT2G05430,AT2G05440	AT2G05518,AT2G05520,AT2G05530,AT2G05540
Chr2	5556000	5557000	Chr2	5588000	5589000	33000	4.51851	12	1.14798e-07	9.49369e-05	5556000	5557000	5588000	5589000	12	1	AT2G13370	AT2G13422,AT2G13430
Chr2	560000	561000	Chr2	592000	593000	33000	4.51851	12	0.000102402	0.0388511	560000	561000	592000	593000	12	1	AT2G02180	AT2G02240,AT2G02250,AT2G02280
Chr2	2732000	2733000	Chr2	2764000	2765000	33000	4.51851	10	4.0227e-05	0.0175207	2732000	2733000	2764000	2765000	10	1	NA	AT2G06850
Chr2	283000	284000	Chr2	315000	316000	33000	4.51851	11	5.55357e-05	0.0230959	283000	284000	315000	316000	11	1	AT2G01640	AT2G01710
Chr2	8207000	8208000	Chr2	8239000	8240000	33000	4.51851	12	1.6804e-05	0.00823398	8207000	8208000	8239000	8240000	12	1	AT2G18940,AT2G18950	AT2G18990,AT2G19000,AT2G19010,AT2G19020,AT2G19030,AT2G19040
Chr2	10585000	10586000	Chr2	10617000	10618000	33000	4.51851	18	1.43267e-08	1.40703e-05	10585000	10586000	10617000	10618000	18	1	AT2G24850	AT2G24960,AT2G24970
Chr2	15076000	15077000	Chr2	15108000	15109000	33000	4.51851	10	4.55748e-05	0.0194993	15076000	15077000	15108000	15109000	10	1	AT2G35920	AT2G35970,AT2G35980
Chr2	9290000	9291000	Chr2	9322000	9323000	33000	4.51851	11	8.42421e-05	0.0329649	9290000	9291000	9322000	9323000	11	1	AT2G21740,AT2G21750,AT2G21760,AT2G21770,AT2G21780,AT2G21790,AT2G21800	AT2G21870,AT2G21880,AT2G21890
Chr3	12559000	12560000	Chr3	12591000	12592000	33000	4.51851	21	3.85347e-15	9.63412e-12	12558000	12561000	12591000	12592000	49	1	NA	AT3G30840,AT3G30841,AT3G30842
Chr3	15953000	15954000	Chr3	15985000	15986000	33000	4.51851	15	1.73136e-07	0.000138569	15953000	15954000	15985000	15986000	15	1	AT3G44260,AT3G44261	AT3G44300
Chr3	1984000	1985000	Chr3	2016000	2017000	33000	4.51851	15	2.66617e-07	0.000205516	1984000	1985000	2016000	2017000	15	1	AT3G06460,AT3G06470	AT3G06510,AT3G06520
Chr3	10283000	10284000	Chr3	10315000	10316000	33000	4.51851	11	2.39323e-05	0.0111923	10283000	10284000	10315000	10316000	11	1	AT3G27720,AT3G27730,AT3G27740	AT3G27820
Chr3	10285000	10286000	Chr3	10317000	10318000	33000	4.51851	9	0.000124454	0.0455912	10285000	10286000	10317000	10318000	9	1	AT3G27750,AT3G27770	AT3G27820,AT3G27825
Chr3	4820000	4821000	Chr3	4852000	4853000	33000	4.51851	12	4.57782e-06	0.00263544	4820000	4821000	4852000	4853000	12	1	AT3G14415	AT3G14452,AT3G14460,AT3G14470,AT3G14475,AT3G14480
Chr3	11624000	11625000	Chr3	11656000	11657000	33000	4.51851	10	1.19798e-05	0.00614459	11624000	11625000	11656000	11657000	10	1	NA	NA
Chr3	16756000	16757000	Chr3	16788000	16789000	33000	4.51851	13	1.19343e-05	0.00612414	16756000	16757000	16788000	16789000	13	1	AT3G45638,AT3G45640	AT3G45690,AT3G45700,AT3G45710,AT3G45720
Chr3	9377000	9378000	Chr3	9409000	9410000	33000	4.51851	14	5.75964e-06	0.00322762	9377000	9378000	9409000	9410000	14	1	AT3G25717	AT3G25780
Chr3	17454000	17455000	Chr3	17486000	17487000	33000	4.51851	11	0.000105329	0.0397752	17454000	17455000	17486000	17487000	11	1	AT3G47370	AT3G47450,AT3G47460
Chr3	17388000	17389000	Chr3	17420000	17421000	33000	4.51851	11	4.64928e-06	0.00267373	17388000	17389000	17420000	17421000	11	1	AT3G47220	AT3G47290
Chr3	4526000	4527000	Chr3	4558000	4559000	33000	4.51851	15	3.41101e-06	0.00202766	4526000	4527000	4558000	4559000	15	1	AT3G13780,AT3G13782,AT3G13784	AT3G13830,AT3G13840,AT3G13845
Chr4	5931000	5932000	Chr4	5963000	5964000	33000	4.51851	13	2.597e-07	0.000200602	5931000	5932000	5963000	5964000	13	1	AT4G09350	AT4G09420
Chr4	9432000	9433000	Chr4	9464000	9465000	33000	4.51851	10	5.71953e-05	0.0237078	9432000	9433000	9464000	9465000	10	1	AT4G16765	AT4G16810
Chr4	5256000	5257000	Chr4	5288000	5289000	33000	4.51851	14	2.99422e-07	0.000228049	5256000	5257000	5288000	5289000	14	1	AT4G08330	AT4G08350
Chr5	13602000	13603000	Chr5	13634000	13635000	33000	4.51851	36	8.96799e-32	1.403e-27	13602000	13603000	13634000	13636000	45	1	AT5G35400	AT5G35410
Chr5	8693000	8694000	Chr5	8725000	8726000	33000	4.51851	12	9.74515e-06	0.0051336	8693000	8695000	8725000	8726000	23	1	AT5G25170	AT5G25210
Chr5	22998000	22999000	Chr5	23030000	23031000	33000	4.51851	12	1.72061e-05	0.00840233	22998000	22999000	23030000	23031000	12	1	AT5G56865	AT5G56930,AT5G56940
Chr5	14590000	14591000	Chr5	14622000	14623000	33000	4.51851	10	2.45228e-05	0.0114326	14590000	14591000	14622000	14623000	10	1	AT5G36940	AT5G37010
Chr5	15904000	15905000	Chr5	15936000	15937000	33000	4.51851	9	2.50856e-05	0.0116531	15904000	15905000	15936000	15937000	9	1	AT5G39740	AT5G39800,AT5G39810,AT5G39820
Chr5	13893000	13894000	Chr5	13925000	13926000	33000	4.51851	10	7.11335e-05	0.0285317	13893000	13894000	13925000	13926000	10	1	AT5G35730	AT5G35753
Chr5	17782000	17783000	Chr5	17814000	17815000	33000	4.51851	11	3.29962e-05	0.0147591	17782000	17783000	17814000	17815000	11	1	NA	AT5G44230
Chr5	15571000	15572000	Chr5	15603000	15604000	33000	4.51851	15	8.65149e-07	0.000596087	15571000	15572000	15603000	15604000	15	1	AT5G38890,AT5G38895	AT5G38960,AT5G38970
Chr5	662000	663000	Chr5	694000	695000	33000	4.51851	11	0.000133461	0.0484063	662000	663000	694000	695000	11	1	AT5G02880	AT5G02960,AT5G02970
Chr5	10038000	10039000	Chr5	10070000	10071000	33000	4.51851	17	1.96838e-09	2.23395e-06	10038000	10039000	10070000	10071000	17	1	AT5G28040	AT5G28060
Chr5	58000	59000	Chr5	90000	91000	33000	4.51851	10	4.77594e-05	0.0202974	58000	59000	90000	91000	10	1	AT5G01170	AT5G01225
Chr5	13876000	13877000	Chr5	13908000	13909000	33000	4.51851	12	1.70017e-05	0.00831517	13876000	13877000	13908000	13909000	12	1	AT5G35700	AT5G35737
Chr5	9638000	9639000	Chr5	9670000	9671000	33000	4.51851	14	1.66289e-05	0.00816052	9638000	9639000	9670000	9671000	14	1	NA	AT5G27380,AT5G27395
Chr5	6381000	6382000	Chr5	6413000	6414000	33000	4.51851	12	1.05666e-05	0.00550813	6381000	6382000	6413000	6414000	12	1	NA	AT5G19110
Chr1	10516000	10517000	Chr1	10547000	10548000	32000	4.50515	14	9.31113e-07	0.00063702	10513000	10517000	10547000	10548000	57	1	AT1G30010,AT1G30020,AT1G30016	AT1G30070,AT1G30080
Chr1	13125000	13126000	Chr1	13156000	13157000	32000	4.50515	11	1.33043e-05	0.00672206	13123000	13126000	13156000	13157000	34	1	AT1G35580	AT1G35617,AT1G35620
Chr1	5997000	5998000	Chr1	6028000	6029000	32000	4.50515	15	2.91869e-06	0.00176372	5997000	5998000	6028000	6029000	15	1	AT1G17455	AT1G17530,AT1G17540
Chr1	22087000	22088000	Chr1	22118000	22119000	32000	4.50515	10	5.4244e-05	0.022645	22087000	22088000	22118000	22119000	10	1	NA	AT1G60040,AT1G60050
Chr1	10683000	10684000	Chr1	10714000	10715000	32000	4.50515	15	4.91519e-07	0.000356871	10683000	10684000	10714000	10715000	15	1	NA	NA
Chr1	16235000	16236000	Chr1	16266000	16267000	32000	4.50515	13	1.29776e-08	1.28509e-05	16235000	16236000	16266000	16267000	13	1	AT1G43140,AT1G43145	AT1G43170
Chr1	11798000	11799000	Chr1	11829000	11830000	32000	4.50515	14	6.3767e-06	0.0035266	11798000	11799000	11829000	11830000	14	1	AT1G32630,AT1G32640	AT1G32700,AT1G32710,AT1G32713,AT1G32720
Chr1	16231000	16232000	Chr1	16262000	16263000	32000	4.50515	9	7.40409e-05	0.0295364	16231000	16232000	16262000	16263000	9	1	AT1G43130	NA
Chr1	15891000	15892000	Chr1	15922000	15923000	32000	4.50515	13	2.54029e-07	0.000196593	15891000	15892000	15922000	15923000	13	1	AT1G42430	NA
Chr1	6003000	6004000	Chr1	6034000	6035000	32000	4.50515	12	7.14667e-05	0.0286536	6003000	6004000	6034000	6035000	12	1	AT1G17460,AT1G17470	AT1G17545,AT1G17550
Chr1	18949000	18950000	Chr1	18980000	18981000	32000	4.50515	15	8.03972e-07	0.000557543	18949000	18950000	18980000	18981000	15	1	AT1G51150,AT1G51160	AT1G51190
Chr1	21431000	21432000	Chr1	21462000	21463000	32000	4.50515	12	1.8688e-05	0.00902971	21431000	21432000	21462000	21463000	12	1	AT1G57860,AT1G57870	AT1G58025
Chr2	5875000	5876000	Chr2	5906000	5907000	32000	4.50515	14	1.61313e-07	0.000129975	5875000	5876000	5906000	5907000	14	1	AT2G14000	AT2G14045
Chr2	8262000	8263000	Chr2	8293000	8294000	32000	4.50515	11	4.45344e-05	0.0191151	8262000	8263000	8293000	8294000	11	1	AT2G19050,AT2G19060,AT2G19070,AT2G19080	AT2G19130
Chr2	14393000	14394000	Chr2	14424000	14425000	32000	4.50515	12	8.2518e-05	0.0323619	14393000	14394000	14424000	14425000	12	1	AT2G34110,AT2G34080	AT2G34160,AT2G34170,AT2G34180
Chr2	15997000	15998000	Chr2	16028000	16029000	32000	4.50515	11	0.000110526	0.041378	15997000	15998000	16028000	16029000	11	1	AT2G38170,AT2G38180,AT2G38185,AT2G38195	NA
Chr2	621000	622000	Chr2	652000	653000	32000	4.50515	13	1.8661e-05	0.00901832	621000	622000	652000	653000	13	1	AT2G02320,AT2G02340,AT2G02350,AT2G02360,AT2G02370	AT2G02470
Chr3	15567000	15568000	Chr3	15598000	15599000	32000	4.50515	25	5.64378e-16	1.56443e-12	15567000	15571000	15598000	15600000	107	0.75	AT3G43660,AT3G43670	NA
Chr3	16584000	16585000	Chr3	16615000	16616000	32000	4.50515	12	1.30681e-05	0.00662167	16584000	16585000	16615000	16617000	25	1	AT3G45248,AT3G45252	AT3G45285
Chr3	16260000	16261000	Chr3	16291000	16292000	32000	4.50515	15	1.86455e-08	1.79292e-05	16260000	16261000	16291000	16292000	15	1	AT3G44710,AT3G44713	AT3G44730,AT3G44735
Chr3	11207000	11208000	Chr3	11238000	11239000	32000	4.50515	14	1.31851e-06	0.00086704	11207000	11208000	11238000	11239000	14	1	AT3G29255	AT3G29280,AT3G29290
Chr3	23150000	23151000	Chr3	23181000	23182000	32000	4.50515	16	6.22629e-07	0.000442398	23150000	23151000	23181000	23182000	16	1	AT3G62590,AT3G62600	AT3G62680
Chr3	8948000	8949000	Chr3	8979000	8980000	32000	4.50515	12	6.75298e-06	0.00370942	8948000	8949000	8979000	8980000	12	1	NA	AT3G24612,AT3G24614,AT3G24615,AT3G24620
Chr3	15615000	15616000	Chr3	15646000	15647000	32000	4.50515	9	3.59567e-05	0.0159119	15615000	15616000	15646000	15647000	9	1	AT3G43720,AT3G43722	AT3G43750
Chr3	11782000	11783000	Chr3	11813000	11814000	32000	4.50515	11	2.83751e-06	0.00171854	11782000	11783000	11813000	11814000	11	1	NA	AT3G30180
Chr4	15275000	15276000	Chr4	15306000	15307000	32000	4.50515	14	3.02056e-06	0.0018185	15275000	15278000	15306000	15307000	42	1	AT4G31500	AT4G31570,AT4G31580
Chr4	9825000	9826000	Chr4	9856000	9857000	32000	4.50515	11	4.87525e-05	0.0206622	9825000	9826000	9856000	9857000	11	1	AT4G17620,AT4G17640	AT4G17710
Chr4	2594000	2595000	Chr4	2625000	2626000	32000	4.50515	12	5.17942e-05	0.0217526	2594000	2595000	2625000	2626000	12	1	AT4G05070,AT4G05071	AT4G05105
Chr4	8890000	8891000	Chr4	8921000	8922000	32000	4.50515	14	1.27632e-06	0.000841933	8890000	8891000	8921000	8922000	14	1	AT4G15563	AT4G15640,AT4G15650,AT4G15660,AT4G15670,AT4G15680
Chr4	5993000	5994000	Chr4	6024000	6025000	32000	4.50515	12	9.06737e-05	0.0350983	5993000	5994000	6024000	6025000	12	1	AT4G09460	AT4G09510,AT4G09520
Chr4	2464000	2465000	Chr4	2495000	2496000	32000	4.50515	11	4.46194e-05	0.0191434	2464000	2465000	2495000	2496000	11	1	AT4G04870,AT4G04880	AT4G04910
Chr4	13255000	13256000	Chr4	13286000	13287000	32000	4.50515	11	0.000100027	0.038093	13255000	13256000	13286000	13287000	11	1	AT4G26150,AT4G26160	AT4G26230,AT4G26240
Chr4	11511000	11512000	Chr4	11542000	11543000	32000	4.50515	13	7.6685e-06	0.0041516	11511000	11512000	11542000	11543000	13	1	AT4G21650,AT4G21660,AT4G21670	AT4G21710,AT4G21720
Chr4	17173000	17174000	Chr4	17204000	17205000	32000	4.50515	14	1.21293e-06	0.000804761	17173000	17174000	17204000	17205000	14	1	AT4G36290,AT4G36350	AT4G36420,AT4G36430
Chr4	8303000	8304000	Chr4	8334000	8335000	32000	4.50515	10	2.51022e-05	0.0116594	8303000	8304000	8334000	8335000	10	1	AT4G14420	AT4G14500
Chr4	15663000	15664000	Chr4	15694000	15695000	32000	4.50515	12	3.29095e-05	0.0147262	15663000	15664000	15694000	15695000	12	1	AT4G32460	AT4G32530
Chr4	5112000	5113000	Chr4	5143000	5144000	32000	4.50515	13	1.34365e-06	0.000880964	5112000	5113000	5143000	5144000	13	1	NA	AT4G08140
Chr4	10889000	10890000	Chr4	10920000	10921000	32000	4.50515	12	1.34161e-05	0.00676756	10889000	10890000	10920000	10921000	12	1	AT4G20150,AT4G20160	AT4G20210,AT4G20220,AT4G20230
Chr5	17592000	17593000	Chr5	17623000	17624000	32000	4.50515	18	1.6187e-11	2.55139e-08	17592000	17593000	17623000	17624000	18	1	AT5G43790	AT5G43830
Chr5	25291000	25292000	Chr5	25322000	25323000	32000	4.50515	11	1.7672e-05	0.00859917	25291000	25292000	25322000	25323000	11	1	NA	AT5G63120
Chr5	12587000	12588000	Chr5	12618000	12619000	32000	4.50515	11	5.56294e-06	0.00313025	12587000	12588000	12618000	12619000	11	1	NA	NA
Chr5	6378000	6379000	Chr5	6409000	6410000	32000	4.50515	11	2.86794e-05	0.0130816	6378000	6379000	6409000	6410000	11	1	AT5G19080	AT5G19100
Chr5	14654000	14655000	Chr5	14685000	14686000	32000	4.50515	9	0.000112193	0.0418571	14654000	14655000	14685000	14686000	9	1	NA	AT5G37130
Chr5	23031000	23032000	Chr5	23062000	23063000	32000	4.50515	10	5.13688e-05	0.0216061	23031000	23032000	23062000	23063000	10	1	AT5G56940,AT5G56950	AT5G56990
Chr5	7258000	7259000	Chr5	7289000	7290000	32000	4.50515	11	2.59396e-05	0.0119967	7258000	7259000	7289000	7290000	11	1	AT5G21950,AT5G21960	AT5G22020,AT5G22030
Chr5	26310000	26311000	Chr5	26341000	26342000	32000	4.50515	12	2.00825e-05	0.00961862	26310000	26311000	26341000	26342000	12	1	AT5G65760	AT5G65820
Chr5	9987000	9988000	Chr5	10018000	10019000	32000	4.50515	13	0.000127492	0.0465661	9987000	9988000	10018000	10019000	13	1	AT5G27950	AT5G27990,AT5G28000
Chr5	1664000	1665000	Chr5	1695000	1696000	32000	4.50515	12	8.1312e-06	0.00437377	1664000	1665000	1695000	1696000	12	1	AT5G05580	AT5G05660,AT5G05670
Chr5	14541000	14542000	Chr5	14572000	14573000	32000	4.50515	16	2.94953e-07	0.000224949	14541000	14542000	14572000	14573000	16	1	AT5G36890	AT5G36930
Chr5	9166000	9167000	Chr5	9197000	9198000	32000	4.50515	12	4.52233e-06	0.00260716	9166000	9167000	9197000	9198000	12	1	NA	AT5G26250,AT5G26260
Chr5	18780000	18781000	Chr5	18811000	18812000	32000	4.50515	8	0.000117019	0.0433268	18780000	18781000	18811000	18812000	8	1	AT5G46295,AT5G46300	AT5G46370
Chr1	9747000	9748000	Chr1	9777000	9778000	31000	4.49136	13	2.41646e-05	0.0112859	9747000	9749000	9777000	9778000	26	1	AT1G27970,AT1G27980,AT1G27990,AT1G28000	AT1G28010,AT1G28020,AT1G28030,AT1G28040,AT1G28050
Chr1	20804000	20805000	Chr1	20834000	20835000	31000	4.49136	14	2.6171e-05	0.0120801	20804000	20805000	20834000	20835000	14	1	AT1G55675,AT1G55680	AT1G55730
Chr1	12554000	12555000	Chr1	12584000	12585000	31000	4.49136	10	6.27328e-05	0.0256114	12554000	12555000	12584000	12585000	10	1	AT1G34380,AT1G34390	AT1G34420
Chr1	18954000	18955000	Chr1	18984000	18985000	31000	4.49136	16	2.41098e-08	2.26814e-05	18954000	18955000	18984000	18985000	16	1	AT1G51170,AT1G51172	AT1G51200,AT1G51210,AT1G51220
Chr1	17397000	17398000	Chr1	17427000	17428000	31000	4.49136	12	0.000101978	0.0387205	17397000	17398000	17427000	17428000	12	1	AT1G47420,AT1G47450	AT1G47490,AT1G47495
Chr1	16234000	16235000	Chr1	16264000	16265000	31000	4.49136	9	4.2764e-05	0.01845	16234000	16235000	16264000	16265000	9	1	AT1G43140	AT1G43160
Chr1	8974000	8975000	Chr1	9004000	9005000	31000	4.49136	13	2.35255e-05	0.0110252	8974000	8975000	9004000	9005000	13	1	AT1G25530,AT1G25540	AT1G25682
Chr1	4527000	4528000	Chr1	4557000	4558000	31000	4.49136	11	0.000125812	0.0460365	4527000	4528000	4557000	4558000	11	1	NA	AT1G13300,AT1G13310
Chr1	18896000	18897000	Chr1	18926000	18927000	31000	4.49136	11	4.12353e-05	0.0178937	18896000	18897000	18926000	18927000	11	1	AT1G50960,AT1G50970,AT1G50980,AT1G50990	AT1G51035,AT1G51040,AT1G51055,AT1G51060
Chr1	19424000	19425000	Chr1	19454000	19455000	31000	4.49136	10	4.54596e-05	0.0194542	19424000	19425000	19454000	19455000	10	1	AT1G52160,AT1G52170,AT1G52180,AT1G52185	AT1G52220,AT1G52230,AT1G52240
Chr1	8105000	8106000	Chr1	8135000	8136000	31000	4.49136	13	0.000120373	0.0443765	8105000	8106000	8135000	8136000	13	1	AT1G22900,AT1G22910	AT1G22980,AT1G22985
Chr1	11877000	11878000	Chr1	11907000	11908000	31000	4.49136	13	5.17063e-06	0.00293392	11877000	11878000	11907000	11908000	13	1	AT1G32790,AT1G32810	AT1G32850,AT1G32860
Chr2	2271000	2272000	Chr2	2301000	2302000	31000	4.49136	14	1.09209e-07	9.06913e-05	2271000	2273000	2301000	2302000	26	1	AT2G05914,AT2G05915,AT2G05920	NA
Chr2	9696000	9697000	Chr2	9726000	9727000	31000	4.49136	13	3.57213e-05	0.0158233	9696000	9697000	9726000	9727000	13	1	AT2G22790	AT2G22830
Chr2	4317000	4318000	Chr2	4347000	4348000	31000	4.49136	17	1.35315e-09	1.57386e-06	4317000	4318000	4347000	4348000	17	1	AT2G10950,AT2G10965	AT2G11000,AT2G11005
Chr2	12907000	12908000	Chr2	12937000	12938000	31000	4.49136	14	1.15256e-05	0.00594389	12907000	12908000	12937000	12938000	14	1	AT2G30260,AT2G30270	AT2G30360,AT2G30362
Chr2	2901000	2902000	Chr2	2931000	2932000	31000	4.49136	25	8.01993e-19	3.09008e-15	2901000	2902000	2931000	2932000	25	1	AT2G06990,AT2G07000	NA
Chr2	5511000	5512000	Chr2	5541000	5542000	31000	4.49136	10	5.23625e-05	0.0219647	5511000	5512000	5541000	5542000	10	1	AT2G13290	AT2G13360,AT2G13363
Chr2	1846000	1847000	Chr2	1876000	1877000	31000	4.49136	12	3.75514e-06	0.00220842	1846000	1847000	1876000	1877000	12	1	AT2G05120	AT2G05180,AT2G05185
Chr2	12100000	12101000	Chr2	12130000	12131000	31000	4.49136	12	2.59916e-05	0.0120151	12100000	12101000	12130000	12131000	12	1	AT2G28330,AT2G28340	AT2G28360
Chr3	18713000	18714000	Chr3	18743000	18744000	31000	4.49136	20	2.79585e-09	3.0936e-06	18713000	18714000	18743000	18745000	32	1	AT3G50420,AT3G50430	AT3G50500,AT3G50505,AT3G50510
Chr3	16165000	16166000	Chr3	16195000	16196000	31000	4.49136	13	1.89635e-05	0.00914348	16165000	16166000	16194000	16196000	25	1	AT3G44600	AT3G44620,AT3G44630
Chr3	22535000	22536000	Chr3	22565000	22566000	31000	4.49136	12	4.84195e-05	0.0205398	22535000	22536000	22565000	22566000	12	1	AT3G60960	AT3G60972,AT3G60980
Chr3	1156000	1157000	Chr3	1186000	1187000	31000	4.49136	14	1.2777e-06	0.000842648	1156000	1157000	1186000	1187000	14	1	AT3G04350,AT3G04360	AT3G04450,AT3G04460
Chr3	10328000	10329000	Chr3	10358000	10359000	31000	4.49136	15	1.05629e-06	0.000712379	10328000	10329000	10358000	10359000	15	1	AT3G27860,AT3G27865	AT3G27910,AT3G27920
Chr3	16006000	16007000	Chr3	16036000	16037000	31000	4.49136	13	4.1805e-06	0.00243027	16006000	16007000	16036000	16037000	13	1	AT3G44330	AT3G44380
Chr4	13791000	13792000	Chr4	13821000	13822000	31000	4.49136	14	8.58021e-06	0.00458454	13791000	13793000	13821000	13822000	27	1	AT4G27630	AT4G27680
Chr4	592000	593000	Chr4	622000	623000	31000	4.49136	14	6.18118e-08	5.37534e-05	592000	593000	622000	623000	14	1	NA	AT4G01460
Chr4	2261000	2262000	Chr4	2291000	2292000	31000	4.49136	10	7.36866e-06	0.00400377	2261000	2262000	2291000	2292000	10	1	AT4G04540	AT4G04570,AT4G04580
Chr4	5716000	5717000	Chr4	5746000	5747000	31000	4.49136	12	9.22781e-05	0.0356355	5716000	5717000	5746000	5747000	12	1	NA	AT4G08960
Chr4	16569000	16570000	Chr4	16599000	16600000	31000	4.49136	11	5.27192e-05	0.0220952	16569000	16570000	16599000	16600000	11	1	AT4G34720,AT4G34730	AT4G34810,AT4G34830
Chr4	6704000	6705000	Chr4	6734000	6735000	31000	4.49136	12	2.10816e-06	0.00131914	6704000	6705000	6734000	6735000	12	1	AT4G10925,AT4G10930	AT4G11010,AT4G11020,AT4G11030
Chr4	8006000	8007000	Chr4	8036000	8037000	31000	4.49136	21	5.97451e-13	1.12616e-09	8006000	8007000	8036000	8037000	21	1	AT4G13780,AT4G13790,AT4G13800,AT4G13810	NA
Chr4	8311000	8312000	Chr4	8341000	8342000	31000	4.49136	12	5.92003e-05	0.0244102	8311000	8312000	8341000	8342000	12	1	AT4G14455	AT4G14510,AT4G14520
Chr4	5376000	5377000	Chr4	5406000	5407000	31000	4.49136	13	2.98011e-06	0.00179651	5376000	5377000	5406000	5407000	13	1	AT4G08455	AT4G08500,AT4G08510
Chr4	10984000	10985000	Chr4	11014000	11015000	31000	4.49136	14	3.75089e-05	0.0164974	10984000	10985000	11014000	11015000	14	1	AT4G20330,AT4G20340	AT4G20410
Chr4	3951000	3952000	Chr4	3981000	3982000	31000	4.49136	9	7.40409e-07	0.000518223	3951000	3952000	3981000	3982000	9	1	NA	NA
Chr5	12558000	12559000	Chr5	12588000	12589000	31000	4.49136	14	1.11553e-07	9.24994e-05	12558000	12559000	12588000	12590000	25	1	AT5G33290	AT5G33320
Chr5	14992000	14993000	Chr5	15022000	15023000	31000	4.49136	13	1.34654e-05	0.00678889	14992000	14993000	15022000	15023000	13	1	AT5G37740	NA
Chr5	19170000	19171000	Chr5	19200000	19201000	31000	4.49136	10	5.99806e-05	0.0246822	19170000	19171000	19200000	19201000	10	1	AT5G47210	AT5G47290,AT5G47300,AT5G47306,AT5G47310
Chr5	14651000	14652000	Chr5	14681000	14682000	31000	4.49136	14	2.00583e-08	1.91692e-05	14651000	14652000	14681000	14682000	14	1	AT5G37070	AT5G37130
Chr5	17075000	17076000	Chr5	17105000	17106000	31000	4.49136	11	7.84302e-05	0.0309964	17075000	17076000	17105000	17106000	11	1	AT5G42630,AT5G42635	AT5G42660
Chr5	17268000	17269000	Chr5	17298000	17299000	31000	4.49136	9	0.000114794	0.0426494	17268000	17269000	17298000	17299000	9	1	AT5G43050	AT5G43090
Chr5	21609000	21610000	Chr5	21639000	21640000	31000	4.49136	11	9.97646e-05	0.0380258	21609000	21610000	21639000	21640000	11	1	AT5G53280	AT5G53320,AT5G53330
Chr5	21999000	22000000	Chr5	22029000	22030000	31000	4.49136	12	5.25821e-06	0.00297837	21999000	22000000	22029000	22030000	12	1	AT5G54210	AT5G54250
Chr1	12465000	12466000	Chr1	12494000	12495000	30000	4.47712	21	1.65103e-11	2.5976e-08	12464000	12467000	12493000	12495000	68	0.833333	AT1G34220	AT1G34270,AT1G34280,AT1G34290
Chr1	10514000	10515000	Chr1	10543000	10544000	30000	4.47712	14	5.9348e-07	0.0004237	10513000	10517000	10542000	10544000	53	0.5	AT1G30010	AT1G30050,AT1G30060
Chr1	2607000	2608000	Chr1	2636000	2637000	30000	4.47712	15	1.57929e-05	0.00779729	2607000	2608000	2635000	2637000	30	1	AT1G08270,AT1G08280	AT1G08340,AT1G08350,AT1G08360
Chr1	4515000	4516000	Chr1	4544000	4545000	30000	4.47712	13	8.85147e-05	0.0343868	4515000	4516000	4544000	4545000	13	1	AT1G13220	AT1G13270
Chr1	18187000	18188000	Chr1	18216000	18217000	30000	4.47712	12	5.31528e-05	0.0222506	18187000	18188000	18216000	18217000	12	1	AT1G49180	AT1G49240,AT1G49245,AT1G49250
Chr1	10219000	10220000	Chr1	10248000	10249000	30000	4.47712	14	2.48849e-05	0.0115716	10219000	10220000	10248000	10249000	14	1	AT1G29240	AT1G29300
Chr1	13669000	13670000	Chr1	13698000	13699000	30000	4.47712	14	5.09439e-07	0.00036854	13669000	13670000	13698000	13699000	14	1	AT1G36310,AT1G36320	AT1G36370
Chr1	7949000	7950000	Chr1	7978000	7979000	30000	4.47712	13	6.20715e-05	0.0253868	7949000	7950000	7978000	7979000	13	1	AT1G22500	AT1G22570
Chr1	17253000	17254000	Chr1	17282000	17283000	30000	4.47712	13	2.46113e-05	0.0114691	17253000	17254000	17282000	17283000	13	1	AT1G46554	AT1G47128
Chr1	24366000	24367000	Chr1	24395000	24396000	30000	4.47712	14	1.78522e-06	0.00113572	24366000	24367000	24395000	24396000	14	1	AT1G65540,AT1G65541,AT1G65550	AT1G65610,AT1G65620
Chr1	25017000	25018000	Chr1	25046000	25047000	30000	4.47712	16	8.14046e-07	0.000563892	25017000	25018000	25046000	25047000	16	1	AT1G67020,AT1G67025,AT1G67030,AT1G67035	AT1G67080
Chr2	560000	561000	Chr2	589000	590000	30000	4.47712	25	3.66508e-14	8.08433e-11	560000	562000	589000	591000	55	0.75	AT2G02180	AT2G02230
Chr2	6836000	6837000	Chr2	6865000	6866000	30000	4.47712	16	5.23333e-06	0.0029656	6836000	6837000	6865000	6867000	27	1	AT2G15695	AT2G15760
Chr2	10631000	10632000	Chr2	10660000	10661000	30000	4.47712	13	2.02797e-06	0.00127389	10631000	10632000	10660000	10662000	27	1	AT2G25000,AT2G25010	AT2G25050,AT2G25052,AT2G25060
Chr2	17231000	17232000	Chr2	17260000	17261000	30000	4.47712	16	2.01662e-07	0.000159081	17230000	17232000	17260000	17261000	29	1	AT2G41342,AT2G41350	AT2G41400
Chr2	286000	287000	Chr2	315000	316000	30000	4.47712	15	3.01039e-07	0.000229097	286000	287000	315000	317000	28	1	AT2G01650	AT2G01710
Chr2	10588000	10589000	Chr2	10617000	10618000	30000	4.47712	16	3.66094e-08	3.33003e-05	10588000	10590000	10617000	10618000	30	1	AT2G24860,AT2G24870	AT2G24960,AT2G24970
Chr2	12487000	12488000	Chr2	12516000	12517000	30000	4.47712	12	7.28528e-05	0.0291177	12487000	12488000	12516000	12517000	12	1	AT2G29070	NA
Chr2	8541000	8542000	Chr2	8570000	8571000	30000	4.47712	16	1.0151e-07	8.48406e-05	8541000	8542000	8570000	8571000	16	1	NA	AT2G19850,AT2G19860
Chr2	12131000	12132000	Chr2	12160000	12161000	30000	4.47712	13	1.94484e-05	0.00934715	12131000	12132000	12160000	12161000	13	1	AT2G28370	AT2G28430,AT2G28440,AT2G28450,AT2G28460
Chr2	9357000	9358000	Chr2	9386000	9387000	30000	4.47712	13	1.98627e-05	0.00952506	9357000	9358000	9386000	9387000	13	1	AT2G21960,AT2G21970,AT2G21980	AT2G22070,AT2G22080
Chr2	283000	284000	Chr2	312000	313000	30000	4.47712	12	9.17108e-05	0.0354503	283000	284000	312000	313000	12	1	AT2G01640	AT2G01690
Chr2	13218000	13219000	Chr2	13247000	13248000	30000	4.47712	17	5.37341e-07	0.000386746	13218000	13219000	13247000	13248000	17	1	AT2G31060	AT2G31082
Chr2	7103000	7104000	Chr2	7132000	7133000	30000	4.47712	14	9.86216e-06	0.00518821	7103000	7104000	7132000	7133000	14	1	AT2G16400	AT2G16450
Chr2	16539000	16540000	Chr2	16568000	16569000	30000	4.47712	15	5.05828e-06	0.00287857	16539000	16540000	16568000	16569000	15	1	AT2G39675,AT2G39681	AT2G39720,AT2G39725
Chr2	6917000	6918000	Chr2	6946000	6947000	30000	4.47712	11	7.41332e-05	0.0295717	6917000	6918000	6946000	6947000	11	1	NA	AT2G15930,AT2G15950
Chr2	15951000	15952000	Chr2	15980000	15981000	30000	4.47712	21	1.3118e-10	1.80048e-07	15951000	15952000	15980000	15981000	21	1	AT2G38100,AT2G38110	AT2G38130,AT2G38140,AT2G38150,AT2G38152,AT2G38160
Chr2	17233000	17234000	Chr2	17262000	17263000	30000	4.47712	14	0.000124279	0.0455356	17233000	17234000	17262000	17263000	14	1	AT2G41350	AT2G41410,AT2G41415
Chr3	17097000	17098000	Chr3	17126000	17127000	30000	4.47712	15	1.09897e-06	0.000737326	17096000	17098000	17125000	17127000	37	0.75	AT3G46460,AT3G46470,AT3G46480	AT3G46510,AT3G46520
Chr3	18049000	18050000	Chr3	18078000	18079000	30000	4.47712	20	2.33904e-10	3.0867e-07	18049000	18050000	18078000	18079000	20	1	AT3G48720,AT3G48730	AT3G48760,AT3G48770
Chr3	3104000	3105000	Chr3	3133000	3134000	30000	4.47712	12	0.000129621	0.047206	3104000	3105000	3133000	3134000	12	1	AT3G10060,AT3G10070	AT3G10130,AT3G10140,AT3G10150,AT3G10160
Chr3	11252000	11253000	Chr3	11281000	11282000	30000	4.47712	11	3.80611e-05	0.0167093	11252000	11253000	11281000	11282000	11	1	AT3G29320	AT3G29375,AT3G29380,AT3G29385
Chr3	15615000	15616000	Chr3	15644000	15645000	30000	4.47712	9	3.986e-05	0.0173793	15615000	15616000	15644000	15645000	9	1	AT3G43720,AT3G43722	AT3G43740
Chr3	16584000	16585000	Chr3	16613000	16614000	30000	4.47712	16	2.09719e-07	0.000164861	16584000	16585000	16613000	16614000	16	1	AT3G45248,AT3G45252	AT3G45280
Chr3	1952000	1953000	Chr3	1981000	1982000	30000	4.47712	13	8.61691e-05	0.0336107	1952000	1953000	1981000	1982000	13	1	NA	AT3G06455
Chr3	16475000	16476000	Chr3	16504000	16505000	30000	4.47712	12	3.70493e-05	0.0163222	16475000	16476000	16504000	16505000	12	1	AT3G45040,AT3G45050,AT3G45060	AT3G45100,AT3G45110
Chr3	6336000	6337000	Chr3	6365000	6366000	30000	4.47712	12	7.56182e-05	0.0300592	6336000	6337000	6365000	6366000	12	1	AT3G18450,AT3G18460,AT3G18470,AT3G18480	AT3G18520
Chr3	7844000	7845000	Chr3	7873000	7874000	30000	4.47712	20	1.32682e-08	1.31203e-05	7844000	7845000	7873000	7874000	20	1	AT3G22230,AT3G22231	AT3G22260,AT3G22270
Chr4	17393000	17394000	Chr4	17422000	17423000	30000	4.47712	13	9.58415e-07	0.000653743	17392000	17394000	17420000	17423000	51	0.666667	AT4G36910	AT4G36945,AT4G36950
Chr4	5729000	5730000	Chr4	5758000	5759000	30000	4.47712	16	4.44406e-07	0.000326105	5729000	5730000	5757000	5759000	29	1	AT4G08930	AT4G08980
Chr4	6049000	6050000	Chr4	6078000	6079000	30000	4.47712	13	1.84668e-06	0.00116994	6049000	6051000	6078000	6079000	23	1	AT4G09570	AT4G09620
Chr4	8305000	8306000	Chr4	8334000	8335000	30000	4.47712	16	6.70395e-08	5.78594e-05	8305000	8306000	8333000	8335000	29	1	AT4G14430,AT4G14440	AT4G14500
Chr4	1931000	1932000	Chr4	1960000	1961000	30000	4.47712	22	2.48581e-13	4.92685e-10	1931000	1933000	1960000	1961000	34	1	NA	AT4G04077,AT4G04078,AT4G04080,AT4G04090
Chr4	6662000	6663000	Chr4	6691000	6692000	30000	4.47712	9	5.01684e-05	0.0211639	6662000	6663000	6691000	6692000	9	1	AT4G10845	AT4G10890,AT4G10895
Chr4	9886000	9887000	Chr4	9915000	9916000	30000	4.47712	12	9.23883e-05	0.0356715	9886000	9887000	9915000	9916000	12	1	AT4G17785	AT4G17830
Chr4	5114000	5115000	Chr4	5143000	5144000	30000	4.47712	12	3.65807e-05	0.0161497	5114000	5115000	5143000	5144000	12	1	NA	AT4G08140
Chr4	9891000	9892000	Chr4	9920000	9921000	30000	4.47712	14	5.26199e-07	0.000379605	9891000	9892000	9920000	9921000	14	1	AT4G17788,AT4G17790	AT4G17840,AT4G17850
Chr4	15663000	15664000	Chr4	15692000	15693000	30000	4.47712	18	1.12068e-10	1.55657e-07	15663000	15664000	15692000	15693000	18	1	AT4G32460	AT4G32510,AT4G32520
Chr4	6892000	6893000	Chr4	6921000	6922000	30000	4.47712	12	6.4505e-06	0.00356062	6892000	6893000	6921000	6922000	12	1	AT4G11310,AT4G11320,AT4G11330	AT4G11380
Chr5	9327000	9328000	Chr5	9356000	9357000	30000	4.47712	15	1.12641e-06	0.000753967	9327000	9329000	9356000	9357000	28	1	AT5G26660	AT5G26640,AT5G26630,AT5G26622,AT5G26617
Chr5	13605000	13606000	Chr5	13634000	13635000	30000	4.47712	12	2.38997e-07	0.000185903	13605000	13606000	13633000	13635000	22	1	AT5G35405	AT5G35410
Chr5	5497000	5498000	Chr5	5526000	5527000	30000	4.47712	15	1.06616e-05	0.00555093	5497000	5498000	5526000	5527000	15	1	AT5G16730	AT5G16800,AT5G16810
Chr5	15906000	15907000	Chr5	15935000	15936000	30000	4.47712	10	3.79998e-05	0.0166871	15906000	15907000	15935000	15936000	10	1	AT5G39750	AT5G39790,AT5G39800
Chr5	9165000	9166000	Chr5	9194000	9195000	30000	4.47712	11	4.13448e-05	0.0179342	9165000	9166000	9194000	9195000	11	1	NA	AT5G26240
Chr5	11705000	11706000	Chr5	11734000	11735000	30000	4.47712	13	1.75804e-12	3.13517e-09	11705000	11706000	11734000	11735000	13	1	NA	NA
Chr5	15475000	15476000	Chr5	15504000	15505000	30000	4.47712	18	2.03503e-08	1.94196e-05	15475000	15476000	15504000	15505000	18	1	AT5G38660,AT5G38670	AT5G38710
Chr5	20523000	20524000	Chr5	20552000	20553000	30000	4.47712	12	8.48347e-05	0.0331684	20523000	20524000	20552000	20553000	12	1	AT5G50400	AT5G50460,AT5G50470,AT5G50480,AT5G50490,AT5G50500
Chr5	7308000	7309000	Chr5	7337000	7338000	30000	4.47712	15	4.87012e-05	0.0206449	7308000	7309000	7337000	7338000	15	1	AT5G22070	AT5G22130
Chr5	10995000	10996000	Chr5	11024000	11025000	30000	4.47712	14	1.68108e-07	0.000134892	10995000	10996000	11024000	11025000	14	1	AT5G28950,AT5G28960	AT5G29000
Chr5	9742000	9743000	Chr5	9771000	9772000	30000	4.47712	12	7.44383e-06	0.00404009	9742000	9743000	9771000	9772000	12	1	AT5G27600	AT5G27620
Chr5	22347000	22348000	Chr5	22376000	22377000	30000	4.47712	11	7.51822e-05	0.0299119	22347000	22348000	22376000	22377000	11	1	AT5G55070	AT5G55130,AT5G55131
Chr5	4445000	4446000	Chr5	4474000	4475000	30000	4.47712	12	9.75834e-05	0.037338	4445000	4446000	4474000	4475000	12	1	AT5G13770	AT5G13860,AT5G13870
Chr5	19135000	19136000	Chr5	19164000	19165000	30000	4.47712	12	5.4907e-05	0.0228802	19135000	19136000	19164000	19165000	12	1	AT5G47110	AT5G47190
Chr1	11495000	11496000	Chr1	11523000	11524000	29000	4.4624	19	2.27519e-10	3.00909e-07	11494000	11496000	11523000	11524000	35	1	NA	AT1G32020,AT1G32030
Chr1	12554000	12555000	Chr1	12582000	12583000	29000	4.4624	20	4.06653e-11	6.03641e-08	12553000	12555000	12582000	12583000	33	1	AT1G34380,AT1G34390	AT1G34410,AT1G34418,AT1G34419
Chr1	25210000	25211000	Chr1	25238000	25239000	29000	4.4624	18	7.28552e-08	6.25455e-05	25209000	25211000	25238000	25239000	31	1	AT1G67320,AT1G67325	AT1G67360,AT1G67365,AT1G67370
Chr1	27029000	27030000	Chr1	27057000	27058000	29000	4.4624	15	1.23288e-05	0.00629795	27029000	27030000	27057000	27058000	15	1	AT1G71860,AT1G71865,AT1G71866	NA
Chr1	10685000	10686000	Chr1	10713000	10714000	29000	4.4624	14	2.33753e-05	0.010972	10685000	10686000	10713000	10714000	14	1	AT1G30330	NA
Chr1	27037000	27038000	Chr1	27065000	27066000	29000	4.4624	15	3.81813e-06	0.00224191	27037000	27038000	27065000	27066000	15	1	AT1G71870	AT1G71910,AT1G71920
Chr1	9350000	9351000	Chr1	9378000	9379000	29000	4.4624	14	5.68196e-05	0.0235686	9350000	9351000	9378000	9379000	14	1	AT1G26945	AT1G27020
Chr1	9696000	9697000	Chr1	9724000	9725000	29000	4.4624	12	6.13999e-05	0.0251569	9696000	9697000	9724000	9725000	12	1	AT1G27840	AT1G27910
Chr1	9668000	9669000	Chr1	9696000	9697000	29000	4.4624	19	4.33112e-09	4.65782e-06	9668000	9669000	9696000	9697000	19	1	AT1G27752,AT1G27760	AT1G27840
Chr1	3000	4000	Chr1	31000	32000	29000	4.4624	12	9.72733e-05	0.0372371	3000	4000	31000	32000	12	1	AT1G01010	AT1G01040,AT1G01046,AT1G01050
Chr1	19610000	19611000	Chr1	19638000	19639000	29000	4.4624	12	0.000116767	0.043242	19610000	19611000	19638000	19639000	12	1	AT1G52640,AT1G52650	AT1G52700,AT1G52710
Chr1	10681000	10682000	Chr1	10709000	10710000	29000	4.4624	15	2.48511e-06	0.00152844	10681000	10682000	10709000	10710000	15	1	AT1G30320	AT1G30350
Chr1	3794000	3795000	Chr1	3822000	3823000	29000	4.4624	13	2.1722e-05	0.0102973	3794000	3795000	3822000	3823000	13	1	AT1G11290,AT1G11300	AT1G11360,AT1G11362
Chr2	12010000	12011000	Chr2	12038000	12039000	29000	4.4624	18	2.22892e-06	0.00138734	12010000	12012000	12038000	12039000	32	1	AT2G28160,AT2G28170,AT2G28180	AT2G28220,AT2G28230
Chr2	5392000	5393000	Chr2	5420000	5421000	29000	4.4624	12	7.92688e-06	0.0042757	5392000	5393000	5420000	5421000	12	1	AT2G13100	AT2G13125,AT2G13126
Chr2	17172000	17173000	Chr2	17200000	17201000	29000	4.4624	12	0.000123497	0.0452961	17172000	17173000	17200000	17201000	12	1	AT2G41190,AT2G41200	AT2G41230,AT2G41231,AT2G41233,AT2G41240,AT2G41250
Chr2	907000	908000	Chr2	935000	936000	29000	4.4624	11	2.1261e-06	0.00132973	907000	908000	935000	936000	11	1	AT2G03070	AT2G03110
Chr2	123000	124000	Chr2	151000	152000	29000	4.4624	11	5.28934e-05	0.0221551	123000	124000	151000	152000	11	1	AT2G01220	AT2G01290,AT2G01300,AT2G01310
Chr2	7311000	7312000	Chr2	7339000	7340000	29000	4.4624	12	5.42349e-05	0.0226433	7311000	7312000	7339000	7340000	12	1	AT2G16850,AT2G16860,AT2G16870	AT2G16920
Chr2	6453000	6454000	Chr2	6481000	6482000	29000	4.4624	8	2.82214e-05	0.0129062	6453000	6454000	6481000	6482000	8	1	AT2G14960	AT2G15000
Chr2	139000	140000	Chr2	167000	168000	29000	4.4624	15	1.77385e-06	0.00112968	139000	140000	167000	168000	15	1	AT2G01270	AT2G01340,AT2G01350,AT2G01360,AT2G01370
Chr2	2322000	2323000	Chr2	2350000	2351000	29000	4.4624	12	9.27329e-05	0.0357921	2322000	2323000	2350000	2351000	12	1	AT2G05990	AT2G06025
Chr2	12100000	12101000	Chr2	12128000	12129000	29000	4.4624	16	2.91341e-07	0.000222523	12100000	12101000	12128000	12129000	16	1	AT2G28330,AT2G28340	AT2G28360
Chr3	15570000	15571000	Chr3	15598000	15599000	29000	4.4624	20	3.69865e-10	4.74325e-07	15567000	15571000	15598000	15600000	107	0.75	NA	NA
Chr3	11006000	11007000	Chr3	11034000	11035000	29000	4.4624	29	8.09887e-20	3.46379e-16	11006000	11009000	11033000	11036000	94	0.555556	AT3G28990,AT3G29000,AT3G29010,AT3G29020	AT3G29035
Chr3	17401000	17402000	Chr3	17429000	17430000	29000	4.4624	13	7.54105e-06	0.0040883	17401000	17402000	17429000	17430000	13	1	AT3G47250	AT3G47300
Chr3	8979000	8980000	Chr3	9007000	9008000	29000	4.4624	13	2.76258e-05	0.0126718	8979000	8980000	9007000	9008000	13	1	AT3G24612,AT3G24614,AT3G24615,AT3G24620	AT3G24670
Chr3	23153000	23154000	Chr3	23181000	23182000	29000	4.4624	18	3.22976e-07	0.000244161	23153000	23154000	23181000	23182000	18	1	AT3G62600,AT3G62610	AT3G62680
Chr3	4822000	4823000	Chr3	4850000	4851000	29000	4.4624	10	7.40836e-06	0.00402337	4822000	4823000	4850000	4851000	10	1	AT3G14420	AT3G14450
Chr3	5104000	5105000	Chr3	5132000	5133000	29000	4.4624	11	0.000136166	0.0492527	5104000	5105000	5132000	5133000	11	1	AT3G15150,AT3G15160	AT3G15220,AT3G15240
Chr3	10912000	10913000	Chr3	10940000	10941000	29000	4.4624	12	1.72377e-05	0.00841415	10912000	10913000	10940000	10941000	12	1	AT3G28910	AT3G28920
Chr3	5920000	5921000	Chr3	5948000	5949000	29000	4.4624	12	5.80604e-05	0.024	5920000	5921000	5948000	5949000	12	1	AT3G17310,AT3G17320,AT3G17330,AT3G17340	AT3G17365,AT3G17370
Chr3	11048000	11049000	Chr3	11076000	11077000	29000	4.4624	14	1.17327e-05	0.00603346	11048000	11049000	11076000	11077000	14	1	AT3G29060	AT3G29095,AT3G29100
Chr3	4275000	4276000	Chr3	4303000	4304000	29000	4.4624	13	1.32805e-05	0.00671397	4275000	4276000	4303000	4304000	13	1	AT3G13240	AT3G13290,AT3G13300
Chr3	15773000	15774000	Chr3	15801000	15802000	29000	4.4624	14	8.68072e-06	0.00462965	15773000	15774000	15801000	15802000	14	1	AT3G43960	AT3G44010,AT3G44020
Chr3	10058000	10059000	Chr3	10086000	10087000	29000	4.4624	13	0.000119903	0.0442326	10058000	10059000	10086000	10087000	13	1	AT3G27240	AT3G27300
Chr4	8578000	8579000	Chr4	8606000	8607000	29000	4.4624	15	2.92599e-07	0.000223374	8578000	8580000	8606000	8607000	29	1	AT4G15020,AT4G15030	AT4G15070,AT4G15075
Chr4	8892000	8893000	Chr4	8920000	8921000	29000	4.4624	12	1.72064e-05	0.00840233	8892000	8893000	8920000	8922000	22	1	AT4G15563,AT4G15570	AT4G15630,AT4G15640
Chr4	2323000	2324000	Chr4	2351000	2352000	29000	4.4624	13	4.12783e-05	0.0179103	2323000	2324000	2351000	2352000	13	1	NA	AT4G04640
Chr4	10701000	10702000	Chr4	10729000	10730000	29000	4.4624	14	3.02951e-05	0.0137134	10701000	10702000	10729000	10730000	14	1	AT4G19670,AT4G19680	AT4G19710,AT4G19720,AT4G19730,AT4G19740
Chr4	2592000	2593000	Chr4	2620000	2621000	29000	4.4624	11	8.7119e-06	0.00464373	2592000	2593000	2620000	2621000	11	1	AT4G05060	NA
Chr4	17229000	17230000	Chr4	17257000	17258000	29000	4.4624	13	3.70755e-05	0.0163329	17229000	17230000	17257000	17258000	13	1	AT4G36510,AT4G36515	AT4G36570,AT4G36580,AT4G36590,AT4G36600,AT4G36610
Chr5	8749000	8750000	Chr5	8777000	8778000	29000	4.4624	9	6.28463e-05	0.0256524	8749000	8753000	8777000	8779000	60	0.5	AT5G25250	NA
Chr5	13831000	13832000	Chr5	13859000	13860000	29000	4.4624	10	6.98721e-05	0.0280983	13831000	13832000	13858000	13860000	22	1	AT5G35630	AT5G35680
Chr5	15903000	15904000	Chr5	15931000	15932000	29000	4.4624	23	5.51881e-09	5.83184e-06	15903000	15904000	15931000	15933000	38	1	AT5G39740	AT5G39785
Chr5	23681000	23682000	Chr5	23709000	23710000	29000	4.4624	12	5.37659e-06	0.00303792	23681000	23682000	23709000	23710000	12	1	AT5G58590,AT5G58595,AT5G58600	AT5G58680,AT5G58690
Chr5	25581000	25582000	Chr5	25609000	25610000	29000	4.4624	11	0.00012851	0.0468805	25581000	25582000	25609000	25610000	11	1	AT5G63920	AT5G63970,AT5G63980
Chr5	25423000	25424000	Chr5	25451000	25452000	29000	4.4624	14	3.09226e-06	0.00185721	25423000	25424000	25451000	25452000	14	1	AT5G63500,AT5G63510	AT5G63560,AT5G63570
Chr5	12558000	12559000	Chr5	12586000	12587000	29000	4.4624	12	8.82844e-08	7.46377e-05	12558000	12559000	12586000	12587000	12	1	AT5G33290	NA
Chr5	14590000	14591000	Chr5	14618000	14619000	29000	4.4624	10	5.90789e-05	0.0243653	14590000	14591000	14618000	14619000	10	1	AT5G36940	AT5G37000
Chr5	15320000	15321000	Chr5	15348000	15349000	29000	4.4624	12	0.000113286	0.0421937	15320000	15321000	15348000	15349000	12	1	AT5G38320,AT5G38330,AT5G38340	AT5G38380
Chr5	24894000	24895000	Chr5	24922000	24923000	29000	4.4624	12	6.82209e-05	0.0275282	24894000	24895000	24922000	24923000	12	1	AT5G61980	AT5G62040
Chr5	24899000	24900000	Chr5	24927000	24928000	29000	4.4624	14	1.05354e-05	0.00549445	24899000	24900000	24927000	24928000	14	1	AT5G61980,AT5G61990	AT5G62050,AT5G62060,AT5G62065
Chr5	19521000	19522000	Chr5	19549000	19550000	29000	4.4624	12	9.52702e-06	0.0050309	19521000	19522000	19549000	19550000	12	1	AT5G48140	AT5G48200,AT5G48205,AT5G48210,AT5G48220
Chr5	937000	938000	Chr5	965000	966000	29000	4.4624	17	3.56749e-07	0.000266836	937000	938000	965000	966000	17	1	AT5G03650,AT5G03660	AT5G03690,AT5G03700
Chr5	13634000	13635000	Chr5	13662000	13663000	29000	4.4624	13	3.4523e-06	0.00204923	13634000	13635000	13662000	13663000	13	1	AT5G35410	AT5G35430
Chr5	18358000	18359000	Chr5	18386000	18387000	29000	4.4624	11	0.000116504	0.0431589	18358000	18359000	18386000	18387000	11	1	AT5G45307	AT5G45360
Chr5	8494000	8495000	Chr5	8522000	8523000	29000	4.4624	14	3.32065e-06	0.00197985	8494000	8495000	8522000	8523000	14	1	AT5G24750,AT5G24760	AT5G24810,AT5G24820
Chr1	21435000	21436000	Chr1	21462000	21463000	28000	4.44716	20	1.60386e-10	2.17069e-07	21435000	21439000	21461000	21464000	98	0.5	AT1G57870,AT1G57906	AT1G58025
Chr1	14148000	14149000	Chr1	14175000	14176000	28000	4.44716	14	2.6194e-08	2.45206e-05	14147000	14149000	14175000	14178000	34	0.5	NA	AT1G37150
Chr1	5000000	5001000	Chr1	5027000	5028000	28000	4.44716	16	5.82886e-06	0.00326077	5000000	5001000	5027000	5028000	16	1	AT1G14590,AT1G14600	AT1G14642,AT1G14650
Chr1	17397000	17398000	Chr1	17424000	17425000	28000	4.44716	13	4.32876e-06	0.00250615	17397000	17398000	17424000	17425000	13	1	AT1G47420,AT1G47450	AT1G47485,AT1G47490
Chr1	22088000	22089000	Chr1	22115000	22116000	28000	4.44716	13	1.12231e-05	0.00580905	22088000	22089000	22115000	22116000	13	1	NA	AT1G60030
Chr1	16937000	16938000	Chr1	16964000	16965000	28000	4.44716	17	1.13145e-08	1.13135e-05	16937000	16938000	16964000	16965000	17	1	NA	AT1G44890
Chr1	7521000	7522000	Chr1	7548000	7549000	28000	4.44716	20	1.18337e-07	9.76663e-05	7521000	7522000	7548000	7549000	20	1	AT1G21470,AT1G21480,AT1G21475	AT1G21540
Chr1	15623000	15624000	Chr1	15650000	15651000	28000	4.44716	16	3.20344e-08	2.94384e-05	15623000	15624000	15650000	15651000	16	1	NA	AT1G41875
Chr1	19996000	19997000	Chr1	20023000	20024000	28000	4.44716	17	4.36235e-08	3.9095e-05	19996000	19997000	20023000	20024000	17	1	AT1G53590	AT1G53640
Chr1	5342000	5343000	Chr1	5369000	5370000	28000	4.44716	12	9.97484e-05	0.0380229	5342000	5343000	5369000	5370000	12	1	AT1G15540,AT1G15550	AT1G15590,AT1G15600,AT1G15610,AT1G15620,AT1G15630,AT1G15640
Chr1	5997000	5998000	Chr1	6024000	6025000	28000	4.44716	26	2.41147e-11	3.71361e-08	5997000	5998000	6024000	6025000	26	1	AT1G17455	AT1G17510,AT1G17520
Chr1	27261000	27262000	Chr1	27288000	27289000	28000	4.44716	14	5.08549e-05	0.0214108	27261000	27262000	27288000	27289000	14	1	AT1G72420	AT1G72480,AT1G72490
Chr1	26126000	26127000	Chr1	26153000	26154000	28000	4.44716	16	1.12938e-05	0.00584131	26126000	26127000	26153000	26154000	16	1	AT1G69500,AT1G69510	AT1G69550
Chr1	20553000	20554000	Chr1	20580000	20581000	28000	4.44716	14	5.82189e-05	0.0240553	20553000	20554000	20580000	20581000	14	1	AT1G55060,AT1G55070,AT1G55080	AT1G55160,AT1G55170,AT1G55175
Chr1	7339000	7340000	Chr1	7366000	7367000	28000	4.44716	12	0.000110892	0.0414971	7339000	7340000	7366000	7367000	12	1	AT1G21000	AT1G21050
Chr1	26249000	26250000	Chr1	26276000	26277000	28000	4.44716	14	8.68297e-05	0.0338259	26249000	26250000	26276000	26277000	14	1	AT1G69770	AT1G69800,AT1G69810,AT1G69818,AT1G69820
Chr2	560000	561000	Chr2	587000	588000	28000	4.44716	36	4.68985e-25	3.47951e-21	558000	564000	584000	588000	204	0.458333	AT2G02180	AT2G02220
Chr2	2737000	2738000	Chr2	2764000	2765000	28000	4.44716	27	1.6026e-18	5.97639e-15	2735000	2739000	2763000	2766000	96	0.5	NA	AT2G06850
Chr2	8207000	8208000	Chr2	8234000	8235000	28000	4.44716	14	6.32104e-06	0.00349984	8207000	8208000	8233000	8235000	26	1	AT2G18940,AT2G18950	AT2G18980
Chr2	6507000	6508000	Chr2	6534000	6535000	28000	4.44716	13	2.86184e-07	0.000218928	6507000	6508000	6533000	6535000	26	1	NA	AT2G15080
Chr2	7215000	7216000	Chr2	7242000	7243000	28000	4.44716	18	1.93511e-08	1.8548e-05	7215000	7216000	7242000	7244000	31	1	AT2G16640,AT2G16650	NA
Chr2	1561000	1562000	Chr2	1588000	1589000	28000	4.44716	14	6.05164e-05	0.0248606	1561000	1562000	1588000	1589000	14	1	AT2G04480	AT2G04550
Chr2	7103000	7104000	Chr2	7130000	7131000	28000	4.44716	18	7.17645e-08	6.16568e-05	7103000	7104000	7130000	7131000	18	1	AT2G16400	AT2G16440
Chr2	1800000	1801000	Chr2	1827000	1828000	28000	4.44716	13	2.84735e-08	2.64159e-05	1800000	1801000	1827000	1828000	13	1	AT2G05070	NA
Chr2	10588000	10589000	Chr2	10615000	10616000	28000	4.44716	11	0.000104259	0.0394342	10588000	10589000	10615000	10616000	11	1	AT2G24860,AT2G24870	AT2G24950
Chr2	1620000	1621000	Chr2	1647000	1648000	28000	4.44716	15	1.18159e-06	0.000786653	1620000	1621000	1647000	1648000	15	1	AT2G04630	AT2G04700
Chr3	11786000	11787000	Chr3	11813000	11814000	28000	4.44716	38	2.4894e-29	2.95963e-25	11785000	11791000	11810000	11814000	363	0.75	AT3G30160	AT3G30180
Chr3	11164000	11165000	Chr3	11191000	11192000	28000	4.44716	16	9.52633e-09	9.64712e-06	11163000	11167000	11190000	11192000	66	0.625	AT3G29190,AT3G29195,AT3G29200	AT3G29240
Chr3	18049000	18050000	Chr3	18076000	18077000	28000	4.44716	20	1.816e-08	1.75121e-05	18049000	18053000	18076000	18077000	78	1	AT3G48720,AT3G48730	AT3G48760
Chr3	1984000	1985000	Chr3	2011000	2012000	28000	4.44716	23	7.0028e-10	8.57198e-07	1984000	1985000	2011000	2013000	42	1	AT3G06460,AT3G06470	NA
Chr3	7844000	7845000	Chr3	7871000	7872000	28000	4.44716	20	3.25935e-09	3.57896e-06	7844000	7845000	7870000	7872000	35	1	AT3G22230,AT3G22231	AT3G22250,AT3G22260
Chr3	18714000	18715000	Chr3	18741000	18742000	28000	4.44716	14	0.000131319	0.0477262	18714000	18715000	18741000	18742000	14	1	AT3G50430,AT3G50440	AT3G50500
Chr3	9719000	9720000	Chr3	9746000	9747000	28000	4.44716	22	1.26111e-11	2.02218e-08	9719000	9720000	9746000	9747000	22	1	NA	AT3G26540,AT3G26550
Chr3	15953000	15954000	Chr3	15980000	15981000	28000	4.44716	11	4.83411e-05	0.0205113	15953000	15954000	15980000	15981000	11	1	AT3G44260,AT3G44261	NA
Chr3	4108000	4109000	Chr3	4135000	4136000	28000	4.44716	12	5.50627e-05	0.0229316	4108000	4109000	4135000	4136000	12	1	AT3G12900	AT3G12950,AT3G12955
Chr3	8209000	8210000	Chr3	8236000	8237000	28000	4.44716	11	0.000132991	0.0482606	8209000	8210000	8236000	8237000	11	1	AT3G23080	AT3G23125,AT3G23130
Chr3	1952000	1953000	Chr3	1979000	1980000	28000	4.44716	13	0.00011157	0.0416886	1952000	1953000	1979000	1980000	13	1	NA	AT3G06450
Chr3	8952000	8953000	Chr3	8979000	8980000	28000	4.44716	14	0.000117809	0.0435697	8952000	8953000	8979000	8980000	14	1	AT3G24535,AT3G24540	AT3G24612,AT3G24614,AT3G24615,AT3G24620
Chr3	6704000	6705000	Chr3	6731000	6732000	28000	4.44716	15	1.48568e-06	0.000963926	6704000	6705000	6731000	6732000	15	1	AT3G19340,AT3G19350	AT3G19410,AT3G19420
Chr3	8667000	8668000	Chr3	8694000	8695000	28000	4.44716	13	0.000122588	0.0450292	8667000	8668000	8694000	8695000	13	1	AT3G23955,AT3G23960,AT3G23970,AT3G23980,AT3G23990	AT3G24068,AT3G24070,AT3G24080
Chr3	19343000	19344000	Chr3	19370000	19371000	28000	4.44716	14	2.4578e-06	0.00151425	19343000	19344000	19370000	19371000	14	1	AT3G52140,AT3G52150,AT3G52155	AT3G52220,AT3G52230
Chr3	5804000	5805000	Chr3	5831000	5832000	28000	4.44716	13	6.12241e-05	0.0251009	5804000	5805000	5831000	5832000	13	1	AT3G17020,AT3G17030	AT3G17100
Chr4	708000	709000	Chr4	735000	736000	28000	4.44716	15	7.7471e-07	0.000539269	708000	710000	733000	737000	68	0.625	AT4G01660	AT4G01710
Chr4	9741000	9742000	Chr4	9768000	9769000	28000	4.44716	18	6.05941e-09	6.36418e-06	9741000	9745000	9767000	9769000	75	0.625	AT4G17460	AT4G17510
Chr4	14804000	14805000	Chr4	14831000	14832000	28000	4.44716	14	1.13168e-05	0.00585013	14804000	14805000	14831000	14832000	14	1	AT4G30220	AT4G30290,AT4G30300,AT4G30310,AT4G30320
Chr4	8863000	8864000	Chr4	8890000	8891000	28000	4.44716	15	8.74728e-07	0.000602313	8863000	8864000	8890000	8891000	15	1	AT4G15520	AT4G15563
Chr4	7397000	7398000	Chr4	7424000	7425000	28000	4.44716	12	6.02657e-05	0.0247785	7397000	7398000	7424000	7425000	12	1	AT4G12470	AT4G12520
Chr4	16573000	16574000	Chr4	16600000	16601000	28000	4.44716	16	9.63288e-06	0.00507928	16573000	16574000	16600000	16601000	16	1	AT4G34730,AT4G34740,AT4G34750,AT4G34760	AT4G34830
Chr4	6146000	6147000	Chr4	6173000	6174000	28000	4.44716	12	2.45808e-06	0.00151425	6146000	6147000	6173000	6174000	12	1	AT4G09750	AT4G09800
Chr4	9891000	9892000	Chr4	9918000	9919000	28000	4.44716	12	2.67927e-05	0.0123314	9891000	9892000	9918000	9919000	12	1	AT4G17788,AT4G17790	AT4G17830,AT4G17840
Chr4	753000	754000	Chr4	780000	781000	28000	4.44716	15	7.54921e-05	0.0300173	753000	754000	780000	781000	15	1	AT4G01740	AT4G01810,AT4G01820
Chr4	6902000	6903000	Chr4	6929000	6930000	28000	4.44716	13	0.000122337	0.0449682	6902000	6903000	6929000	6930000	13	1	AT4G11350	AT4G11390
Chr4	5986000	5987000	Chr4	6013000	6014000	28000	4.44716	12	5.37974e-06	0.00303904	5986000	5987000	6013000	6014000	12	1	AT4G09440,AT4G09450	NA
Chr4	10832000	10833000	Chr4	10859000	10860000	28000	4.44716	13	8.93306e-05	0.034657	10832000	10833000	10859000	10860000	13	1	AT4G19980,AT4G19985,AT4G19990	AT4G20060
Chr4	13796000	13797000	Chr4	13823000	13824000	28000	4.44716	19	1.23615e-10	1.70327e-07	13796000	13797000	13823000	13824000	19	1	AT4G27630	AT4G27680,AT4G27690
Chr4	57000	58000	Chr4	84000	85000	28000	4.44716	11	1.91438e-05	0.009223	57000	58000	84000	85000	11	1	AT4G00150	AT4G00200,AT4G00210
Chr4	17761000	17762000	Chr4	17788000	17789000	28000	4.44716	16	2.64248e-06	0.00161493	17761000	17762000	17788000	17789000	16	1	NA	AT4G37830,AT4G37840
Chr4	1292000	1293000	Chr4	1319000	1320000	28000	4.44716	9	3.20906e-05	0.0144137	1292000	1293000	1319000	1320000	9	1	AT4G02910,AT4G02920	AT4G02970,AT4G02980
Chr4	9744000	9745000	Chr4	9771000	9772000	28000	4.44716	14	1.27423e-07	0.000104621	9744000	9745000	9771000	9772000	14	1	AT4G17470	AT4G17520
Chr5	10166000	10167000	Chr5	10193000	10194000	28000	4.44716	11	1.2161e-05	0.00622407	10166000	10167000	10192000	10194000	22	1	AT5G28180,AT5G28190	AT5G28220,AT5G28235
Chr5	19348000	19349000	Chr5	19375000	19376000	28000	4.44716	17	2.30989e-07	0.000180106	19348000	19349000	19374000	19376000	30	1	AT5G47780	AT5G47840
Chr5	11705000	11706000	Chr5	11732000	11733000	28000	4.44716	14	5.40462e-13	1.02445e-09	11705000	11706000	11731000	11733000	21	1	NA	NA
Chr5	24146000	24147000	Chr5	24173000	24174000	28000	4.44716	12	2.06269e-05	0.00984541	24146000	24147000	24173000	24174000	12	1	AT5G59970,AT5G59980,AT5G59990	AT5G60010,AT5G60022,AT5G60020,AT5G60030,AT5G60040
Chr5	8698000	8699000	Chr5	8725000	8726000	28000	4.44716	12	3.38537e-07	0.000254471	8698000	8699000	8725000	8726000	12	1	NA	AT5G25210
Chr5	15908000	15909000	Chr5	15935000	15936000	28000	4.44716	15	2.84525e-08	2.63996e-05	15908000	15909000	15935000	15936000	15	1	NA	AT5G39790,AT5G39800
Chr5	2594000	2595000	Chr5	2621000	2622000	28000	4.44716	11	3.02419e-05	0.0136917	2594000	2595000	2621000	2622000	11	1	AT5G08090,AT5G08100,AT5G08110	AT5G08141
Chr5	20083000	20084000	Chr5	20110000	20111000	28000	4.44716	13	2.7098e-05	0.0124577	20083000	20084000	20110000	20111000	13	1	NA	AT5G49555,AT5G49560
Chr5	10213000	10214000	Chr5	10240000	10241000	28000	4.44716	7	9.07147e-05	0.0351124	10213000	10214000	10240000	10241000	7	1	AT5G28237	NA
Chr5	14654000	14655000	Chr5	14681000	14682000	28000	4.44716	9	0.00010624	0.0400628	14654000	14655000	14681000	14682000	9	1	NA	AT5G37130
Chr5	12561000	12562000	Chr5	12588000	12589000	28000	4.44716	12	3.06065e-05	0.0138326	12561000	12562000	12588000	12589000	12	1	AT5G33290	AT5G33320
Chr5	117000	118000	Chr5	144000	145000	28000	4.44716	10	8.99548e-05	0.0348638	117000	118000	144000	145000	10	1	AT5G01280,AT5G01290	AT5G01340
Chr5	21568000	21569000	Chr5	21595000	21596000	28000	4.44716	12	1.4524e-05	0.00725081	21568000	21569000	21595000	21596000	12	1	AT5G53170,AT5G53180	AT5G53220,AT5G53230
Chr5	14567000	14568000	Chr5	14594000	14595000	28000	4.44716	9	3.99563e-05	0.0174165	14567000	14568000	14594000	14595000	9	1	AT5G36930	AT5G36940,AT5G36950
Chr5	44000	45000	Chr5	71000	72000	28000	4.44716	12	7.0737e-05	0.0283976	44000	45000	71000	72000	12	1	AT5G01110,AT5G01120,AT5G01130	AT5G01190
Chr5	15787000	15788000	Chr5	15814000	15815000	28000	4.44716	12	0.000100362	0.0381999	15787000	15788000	15814000	15815000	12	1	AT5G39450,AT5G39460,AT5G39470,AT5G39471	AT5G39490,AT5G39493
Chr5	8756000	8757000	Chr5	8783000	8784000	28000	4.44716	13	4.92895e-06	0.00281218	8756000	8757000	8783000	8784000	13	1	AT5G25265	AT5G25300,AT5G25310,AT5G25320
Chr5	21724000	21725000	Chr5	21751000	21752000	28000	4.44716	14	8.74703e-05	0.0340329	21724000	21725000	21751000	21752000	14	1	AT5G53490	AT5G53540
Chr5	14941000	14942000	Chr5	14968000	14969000	28000	4.44716	10	4.67385e-05	0.0199248	14941000	14942000	14968000	14969000	10	1	AT5G37620	AT5G37667,AT5G37670
Chr5	3517000	3518000	Chr5	3544000	3545000	28000	4.44716	12	0.000116685	0.0432136	3517000	3518000	3544000	3545000	12	1	AT5G11080	AT5G11130
Chr5	8161000	8162000	Chr5	8188000	8189000	28000	4.44716	12	8.14807e-07	0.000564352	8161000	8162000	8188000	8189000	12	1	NA	AT5G24160,AT5G24165
Chr1	13643000	13644000	Chr1	13669000	13670000	27000	4.43136	18	2.92048e-10	3.80365e-07	13641000	13644000	13669000	13670000	45	1	AT1G36280	AT1G36310,AT1G36320
Chr1	11712000	11713000	Chr1	11738000	11739000	27000	4.43136	12	7.77224e-06	0.00420074	11712000	11713000	11738000	11740000	23	1	AT1G32430,AT1G32440	AT1G32460
Chr1	4888000	4889000	Chr1	4914000	4915000	27000	4.43136	16	1.20299e-05	0.00616755	4888000	4889000	4914000	4915000	16	1	AT1G14310,AT1G14315,AT1G14320	AT1G14360
Chr1	16125000	16126000	Chr1	16151000	16152000	27000	4.43136	15	2.71373e-06	0.00165284	16125000	16126000	16151000	16152000	15	1	AT1G42960	AT1G43005,AT1G43010,AT1G43020
Chr1	11786000	11787000	Chr1	11812000	11813000	27000	4.43136	10	0.000122935	0.0451242	11786000	11787000	11812000	11813000	10	1	AT1G32583,AT1G32582,AT1G32585	AT1G32660,AT1G32670
Chr1	23378000	23379000	Chr1	23404000	23405000	27000	4.43136	15	5.60003e-07	0.000401681	23378000	23379000	23404000	23405000	15	1	AT1G63050,AT1G63055	AT1G63105,AT1G63110
Chr1	10513000	10514000	Chr1	10539000	10540000	27000	4.43136	11	0.000129252	0.0471049	10513000	10514000	10539000	10540000	11	1	AT1G30010	AT1G30040
Chr1	13669000	13670000	Chr1	13695000	13696000	27000	4.43136	12	1.29858e-05	0.00658725	13669000	13670000	13695000	13696000	12	1	AT1G36310,AT1G36320	AT1G36350
Chr1	8480000	8481000	Chr1	8506000	8507000	27000	4.43136	15	4.38988e-06	0.0025372	8480000	8481000	8506000	8507000	15	1	AT1G23960,AT1G23965	AT1G24030,AT1G24040,AT1G24050,AT1G24060,AT1G24062,AT1G24068,AT1G24070
Chr1	20648000	20649000	Chr1	20674000	20675000	27000	4.43136	13	6.2153e-05	0.0254148	20648000	20649000	20674000	20675000	13	1	AT1G55325,AT1G55330	AT1G55365,AT1G55370,AT1G55380,AT1G55390
Chr1	9399000	9400000	Chr1	9425000	9426000	27000	4.43136	15	1.24721e-06	0.000825106	9399000	9400000	9425000	9426000	15	1	AT1G27070,AT1G27080	AT1G27130
Chr1	8271000	8272000	Chr1	8297000	8298000	27000	4.43136	16	8.85851e-05	0.0344115	8271000	8272000	8297000	8298000	16	1	AT1G23280,AT1G23290,AT1G23300,AT1G23310,AT1G23320,AT1G23330	AT1G23350,AT1G23360,AT1G23380
Chr1	29745000	29746000	Chr1	29771000	29772000	27000	4.43136	14	6.18327e-05	0.0253064	29745000	29746000	29771000	29772000	14	1	AT1G79070,AT1G79075	AT1G79130,AT1G79150
Chr2	7218000	7219000	Chr2	7244000	7245000	27000	4.43136	22	2.5514e-09	2.8409e-06	7218000	7219000	7242000	7245000	57	1	AT2G16650,AT2G16660	AT2G16700
Chr2	286000	287000	Chr2	312000	313000	27000	4.43136	17	3.30001e-07	0.000248735	285000	287000	312000	314000	51	0.75	AT2G01650	AT2G01690
Chr2	7644000	7645000	Chr2	7670000	7671000	27000	4.43136	16	8.99865e-06	0.00477791	7644000	7645000	7670000	7671000	16	1	AT2G17570	AT2G17640
Chr2	9512000	9513000	Chr2	9538000	9539000	27000	4.43136	13	5.04495e-05	0.0212632	9512000	9513000	9538000	9539000	13	1	AT2G22410	AT2G22470,AT2G22475
Chr2	6735000	6736000	Chr2	6761000	6762000	27000	4.43136	14	5.94552e-06	0.00331625	6735000	6736000	6761000	6762000	14	1	AT2G15430	AT2G15480,AT2G15490
Chr2	7285000	7286000	Chr2	7311000	7312000	27000	4.43136	13	0.00010565	0.039873	7285000	7286000	7311000	7312000	13	1	AT2G16790,AT2G16800,AT2G16810,AT2G16835	AT2G16850,AT2G16860,AT2G16870
Chr2	12074000	12075000	Chr2	12100000	12101000	27000	4.43136	12	5.84333e-05	0.0241349	12074000	12075000	12100000	12101000	12	1	AT2G28290	AT2G28330,AT2G28340
Chr2	18624000	18625000	Chr2	18650000	18651000	27000	4.43136	16	4.31132e-05	0.01858	18624000	18625000	18650000	18651000	16	1	AT2G45170	NA
Chr2	9696000	9697000	Chr2	9722000	9723000	27000	4.43136	19	7.35375e-07	0.000515303	9696000	9697000	9722000	9723000	19	1	AT2G22790	AT2G22820,AT2G22821
Chr2	12131000	12132000	Chr2	12157000	12158000	27000	4.43136	15	2.14867e-05	0.0102013	12131000	12132000	12157000	12158000	15	1	AT2G28370	AT2G28420
Chr2	523000	524000	Chr2	549000	550000	27000	4.43136	13	1.28556e-06	0.000847236	523000	524000	549000	550000	13	1	AT2G02090	AT2G02148,AT2G02150
Chr2	497000	498000	Chr2	523000	524000	27000	4.43136	10	5.97039e-05	0.0245814	497000	498000	523000	524000	10	1	AT2G02060,AT2G02061	AT2G02090
Chr2	9806000	9807000	Chr2	9832000	9833000	27000	4.43136	11	5.07898e-05	0.021388	9806000	9807000	9832000	9833000	11	1	AT2G23020,AT2G23030,AT2G23040	AT2G23093,AT2G23096
Chr2	874000	875000	Chr2	900000	901000	27000	4.43136	17	1.1972e-05	0.00614147	874000	875000	900000	901000	17	1	AT2G02990,AT2G03000	AT2G03050
Chr2	289000	290000	Chr2	315000	316000	27000	4.43136	12	4.82317e-05	0.0204715	289000	290000	315000	316000	12	1	NA	AT2G01710
Chr2	8553000	8554000	Chr2	8579000	8580000	27000	4.43136	15	7.37946e-05	0.0294533	8553000	8554000	8579000	8580000	15	1	AT2G19820	NA
Chr3	4824000	4825000	Chr3	4850000	4851000	27000	4.43136	22	1.61686e-12	2.90071e-09	4824000	4826000	4846000	4853000	168	0.785714	AT3G14420,AT3G14430	AT3G14450
Chr3	22521000	22522000	Chr3	22547000	22548000	27000	4.43136	14	7.06384e-06	0.00385539	22521000	22523000	22547000	22549000	24	0.5	AT3G60940	AT3G60961
Chr3	9607000	9608000	Chr3	9633000	9634000	27000	4.43136	13	1.50634e-06	0.000975865	9607000	9608000	9633000	9635000	24	1	AT3G26240	AT3G26280,AT3G26290
Chr3	9712000	9713000	Chr3	9738000	9739000	27000	4.43136	14	4.35834e-06	0.00252159	9712000	9713000	9738000	9739000	14	1	AT3G26510,AT3G26511	NA
Chr3	17398000	17399000	Chr3	17424000	17425000	27000	4.43136	12	9.42526e-05	0.0362849	17398000	17399000	17424000	17425000	12	1	NA	NA
Chr3	10934000	10935000	Chr3	10960000	10961000	27000	4.43136	15	4.8964e-07	0.000355673	10934000	10935000	10960000	10961000	15	1	AT3G28918	AT3G28925,AT3G28930
Chr3	22379000	22380000	Chr3	22405000	22406000	27000	4.43136	15	3.80077e-05	0.0166896	22379000	22380000	22405000	22406000	15	1	AT3G60550	NA
Chr3	9717000	9718000	Chr3	9743000	9744000	27000	4.43136	12	1.1335e-05	0.00585723	9717000	9718000	9743000	9744000	12	1	NA	AT3G26539
Chr3	10908000	10909000	Chr3	10934000	10935000	27000	4.43136	12	9.67162e-05	0.0370646	10908000	10909000	10934000	10935000	12	1	NA	AT3G28918
Chr3	4195000	4196000	Chr3	4221000	4222000	27000	4.43136	14	7.06004e-07	0.000496242	4195000	4196000	4221000	4222000	14	1	AT3G13070,AT3G13080	AT3G13120,AT3G13130
Chr3	22217000	22218000	Chr3	22243000	22244000	27000	4.43136	15	4.80984e-05	0.0204217	22217000	22218000	22243000	22244000	15	1	AT3G60140	AT3G60176,AT3G60180
Chr4	2609000	2610000	Chr4	2635000	2636000	27000	4.43136	12	1.43756e-05	0.00718769	2609000	2610000	2634000	2636000	23	1	AT4G05080,AT4G05090	AT4G05130
Chr4	2265000	2266000	Chr4	2291000	2292000	27000	4.43136	11	1.7545e-05	0.00854594	2265000	2266000	2290000	2292000	20	1	NA	AT4G04570,AT4G04580
Chr4	2517000	2518000	Chr4	2543000	2544000	27000	4.43136	18	3.59271e-07	0.00026855	2517000	2518000	2543000	2544000	18	1	AT4G04940,AT4G04950	AT4G04970,AT4G04972,AT4G04980,AT4G04985
Chr4	730000	731000	Chr4	756000	757000	27000	4.43136	13	1.81305e-05	0.0087909	730000	731000	756000	757000	13	1	AT4G01690	AT4G01750
Chr4	7877000	7878000	Chr4	7903000	7904000	27000	4.43136	13	1.09786e-05	0.00569541	7877000	7878000	7903000	7904000	13	1	AT4G13554	AT4G13590,AT4G13600
Chr4	1154000	1155000	Chr4	1180000	1181000	27000	4.43136	14	3.43096e-05	0.015264	1154000	1155000	1180000	1181000	14	1	AT4G02640	NA
Chr4	16040000	16041000	Chr4	16066000	16067000	27000	4.43136	14	8.79735e-06	0.00468373	16040000	16041000	16066000	16067000	14	1	AT4G33250,AT4G33260,AT4G33270	AT4G33350
Chr4	13463000	13464000	Chr4	13489000	13490000	27000	4.43136	11	0.000121214	0.044625	13463000	13464000	13489000	13490000	11	1	AT4G26700	AT4G26795,AT4G26790,AT4G26800
Chr4	2778000	2779000	Chr4	2804000	2805000	27000	4.43136	14	1.54896e-07	0.000125286	2778000	2779000	2804000	2805000	14	1	AT4G05490,AT4G05494,AT4G05497	AT4G05520,AT4G05523
Chr4	2594000	2595000	Chr4	2620000	2621000	27000	4.43136	11	4.53539e-05	0.0194144	2594000	2595000	2620000	2621000	11	1	AT4G05070,AT4G05071	NA
Chr5	8752000	8753000	Chr5	8778000	8779000	27000	4.43136	28	4.24785e-15	1.05556e-11	8749000	8753000	8777000	8779000	60	0.5	AT5G25260	AT5G25290
Chr5	20797000	20798000	Chr5	20823000	20824000	27000	4.43136	19	7.59949e-10	9.2485e-07	20795000	20798000	20823000	20824000	48	1	AT5G51180	AT5G51220,AT5G51230
Chr5	17963000	17964000	Chr5	17989000	17990000	27000	4.43136	25	1.23646e-14	2.90186e-11	17963000	17965000	17989000	17991000	51	0.75	AT5G44569	AT5G44590,AT5G44600
Chr5	9835000	9836000	Chr5	9861000	9862000	27000	4.43136	14	1.43517e-06	0.000934741	9835000	9837000	9860000	9862000	37	0.75	AT5G27770,AT5G27780,AT5G27790	AT5G27820,AT5G27830
Chr5	5897000	5898000	Chr5	5923000	5924000	27000	4.43136	13	5.0323e-05	0.0212156	5897000	5898000	5923000	5925000	25	1	AT5G17830,AT5G17840	AT5G17890
Chr5	15910000	15911000	Chr5	15936000	15937000	27000	4.43136	17	2.24955e-08	2.12657e-05	15910000	15912000	15936000	15937000	33	1	NA	AT5G39800,AT5G39810,AT5G39820
Chr5	25795000	25796000	Chr5	25821000	25822000	27000	4.43136	14	2.73853e-05	0.0125756	25795000	25796000	25821000	25822000	14	1	AT5G64530	AT5G64580,AT5G64590
Chr5	14021000	14022000	Chr5	14047000	14048000	27000	4.43136	12	5.76903e-05	0.0238768	14021000	14022000	14047000	14048000	12	1	AT5G35870,AT5G35890	NA
Chr5	3516000	3517000	Chr5	3542000	3543000	27000	4.43136	13	3.83608e-05	0.0168266	3516000	3517000	3542000	3543000	13	1	AT5G11070	AT5G11130
Chr5	2330000	2331000	Chr5	2356000	2357000	27000	4.43136	16	3.3223e-05	0.0148409	2330000	2331000	2356000	2357000	16	1	AT5G07360,AT5G07370	AT5G07430,AT5G07440
Chr5	1213000	1214000	Chr5	1239000	1240000	27000	4.43136	13	8.10375e-05	0.0318664	1213000	1214000	1239000	1240000	13	1	AT5G04330	AT5G04370,AT5G04380,AT5G04386,AT5G04390
Chr5	2172000	2173000	Chr5	2198000	2199000	27000	4.43136	13	9.25712e-05	0.0357368	2172000	2173000	2198000	2199000	13	1	AT5G07000,AT5G07010	AT5G07070
Chr5	17782000	17783000	Chr5	17808000	17809000	27000	4.43136	11	7.48998e-05	0.0298209	17782000	17783000	17808000	17809000	11	1	NA	AT5G44220
Chr5	15903000	15904000	Chr5	15929000	15930000	27000	4.43136	14	3.2868e-06	0.00196256	15903000	15904000	15929000	15930000	14	1	AT5G39740	AT5G39785
Chr5	7014000	7015000	Chr5	7040000	7041000	27000	4.43136	10	3.52054e-05	0.0156138	7014000	7015000	7040000	7041000	10	1	AT5G20710,AT5G20720	AT5G20790
Chr5	9745000	9746000	Chr5	9771000	9772000	27000	4.43136	14	1.08708e-06	0.000730548	9745000	9746000	9771000	9772000	14	1	AT5G27600,AT5G27606	AT5G27620
Chr5	15482000	15483000	Chr5	15508000	15509000	27000	4.43136	13	1.21396e-05	0.00621518	15482000	15483000	15508000	15509000	13	1	AT5G38690	AT5G38720
Chr1	26128000	26129000	Chr1	26153000	26154000	26000	4.41497	21	2.23446e-08	2.11359e-05	26128000	26130000	26152000	26154000	51	0.75	AT1G69520	AT1G69550
Chr1	6003000	6004000	Chr1	6028000	6029000	26000	4.41497	22	1.02533e-10	1.43284e-07	6003000	6004000	6026000	6029000	56	1	AT1G17460,AT1G17470	AT1G17530,AT1G17540
Chr1	24336000	24337000	Chr1	24361000	24362000	26000	4.41497	27	3.8438e-10	4.91885e-07	24335000	24337000	24361000	24362000	46	1	AT1G65480	AT1G65520
Chr1	11715000	11716000	Chr1	11740000	11741000	26000	4.41497	24	3.11055e-13	6.07832e-10	11715000	11717000	11740000	11741000	40	1	AT1G32440,AT1G32450	AT1G32470,AT1G32480
Chr1	23004000	23005000	Chr1	23029000	23030000	26000	4.41497	19	1.07752e-06	0.000724934	23004000	23005000	23028000	23030000	37	1	AT1G62270,AT1G62280	AT1G62305
Chr1	19225000	19226000	Chr1	19250000	19251000	26000	4.41497	14	7.16957e-05	0.0287276	19225000	19226000	19250000	19251000	14	1	AT1G51805,AT1G51810	AT1G51840
Chr1	25017000	25018000	Chr1	25042000	25043000	26000	4.41497	14	4.59134e-05	0.019615	25017000	25018000	25042000	25043000	14	1	AT1G67020,AT1G67025,AT1G67030,AT1G67035	AT1G67070
Chr1	7954000	7955000	Chr1	7979000	7980000	26000	4.41497	19	3.26385e-07	0.000246319	7954000	7955000	7979000	7980000	19	1	AT1G22520	NA
Chr1	21642000	21643000	Chr1	21667000	21668000	26000	4.41497	19	1.67391e-06	0.00107183	21642000	21643000	21667000	21668000	19	1	AT1G58320,AT1G58330	AT1G58350
Chr1	12178000	12179000	Chr1	12203000	12204000	26000	4.41497	14	1.59687e-05	0.00787034	12178000	12179000	12203000	12204000	14	1	AT1G33590	AT1G33670,AT1G33680
Chr1	10942000	10943000	Chr1	10967000	10968000	26000	4.41497	15	1.22342e-05	0.00625741	10942000	10943000	10967000	10968000	15	1	AT1G30810,AT1G30814	NA
Chr1	8640000	8641000	Chr1	8665000	8666000	26000	4.41497	16	7.60624e-05	0.0302113	8640000	8641000	8665000	8666000	16	1	AT1G24350,AT1G24360,AT1G24380,AT1G24388,AT1G24390	AT1G24405,AT1G24420,AT1G24430,AT1G24440,AT1G24450,AT1G24460
Chr1	1534000	1535000	Chr1	1559000	1560000	26000	4.41497	18	3.19662e-08	2.93827e-05	1534000	1535000	1559000	1560000	18	1	AT1G05260,AT1G05270,AT1G05280	AT1G05330,AT1G05340
Chr1	21309000	21310000	Chr1	21334000	21335000	26000	4.41497	15	9.90597e-06	0.00520738	21309000	21310000	21334000	21335000	15	1	AT1G57340,AT1G57350,AT1G57360,AT1G57370,AT1G57380,AT1G57390,AT1G57400,AT1G57410,AT1G57420,AT1G57430,AT1G57440,AT1G57450,AT1G57460,AT1G57470,AT1G57480,AT1G57490,AT1G57500,AT1G57510,AT1G57520,AT1G57530	AT1G57600
Chr1	18949000	18950000	Chr1	18974000	18975000	26000	4.41497	17	6.41606e-06	0.00354539	18949000	18950000	18974000	18975000	17	1	AT1G51150,AT1G51160	NA
Chr1	12465000	12466000	Chr1	12490000	12491000	26000	4.41497	14	1.12787e-05	0.00583471	12465000	12466000	12490000	12491000	14	1	AT1G34220	AT1G34260
Chr2	7215000	7216000	Chr2	7240000	7241000	26000	4.41497	27	8.1981e-14	1.72839e-10	7215000	7216000	7238000	7241000	60	1	AT2G16640,AT2G16650	NA
Chr2	15080000	15081000	Chr2	15105000	15106000	26000	4.41497	12	3.24356e-05	0.0145435	15080000	15081000	15104000	15106000	26	1	AT2G35920	AT2G35950
Chr2	1538000	1539000	Chr2	1563000	1564000	26000	4.41497	13	7.73349e-06	0.00418358	1538000	1539000	1563000	1565000	27	1	AT2G04425,AT2G04430	NA
Chr2	12671000	12672000	Chr2	12696000	12697000	26000	4.41497	22	8.72655e-08	7.38565e-05	12671000	12672000	12696000	12698000	39	1	AT2G29630,AT2G29640	AT2G29690
Chr2	1382000	1383000	Chr2	1407000	1408000	26000	4.41497	12	5.86503e-06	0.00327652	1382000	1383000	1407000	1408000	12	1	NA	AT2G04160
Chr2	16987000	16988000	Chr2	17012000	17013000	26000	4.41497	12	0.000135176	0.048938	16987000	16988000	17012000	17013000	12	1	AT2G40720	AT2G40760,AT2G40765
Chr2	6922000	6923000	Chr2	6947000	6948000	26000	4.41497	13	3.37253e-06	0.00200786	6922000	6923000	6947000	6948000	13	1	AT2G15890	AT2G15960
Chr2	5906000	5907000	Chr2	5931000	5932000	26000	4.41497	21	2.17174e-08	2.05978e-05	5906000	5907000	5931000	5932000	21	1	AT2G14045	AT2G14095,AT2G14100
Chr2	15502000	15503000	Chr2	15527000	15528000	26000	4.41497	15	8.72908e-05	0.0339749	15502000	15503000	15527000	15528000	15	1	AT2G36910	AT2G36960
Chr2	12135000	12136000	Chr2	12160000	12161000	26000	4.41497	13	7.18821e-05	0.0287949	12135000	12136000	12160000	12161000	13	1	AT2G28380	AT2G28430,AT2G28440,AT2G28450,AT2G28460
Chr2	14398000	14399000	Chr2	14423000	14424000	26000	4.41497	12	9.79182e-05	0.0374495	14398000	14399000	14423000	14424000	12	1	AT2G34110,AT2G34090	AT2G34150
Chr2	283000	284000	Chr2	308000	309000	26000	4.41497	17	1.11542e-05	0.00577837	283000	284000	308000	309000	17	1	AT2G01640	AT2G01680,AT2G01690
Chr3	9721000	9722000	Chr3	9746000	9747000	26000	4.41497	22	1.39096e-11	2.21988e-08	9721000	9723000	9746000	9747000	36	1	NA	AT3G26540,AT3G26550
Chr3	8350000	8351000	Chr3	8375000	8376000	26000	4.41497	16	2.63982e-08	2.4685e-05	8349000	8351000	8375000	8376000	31	1	AT3G23340	AT3G23380,AT3G23390
Chr3	18049000	18050000	Chr3	18074000	18075000	26000	4.41497	28	2.48544e-13	4.92685e-10	18049000	18051000	18074000	18075000	43	1	AT3G48720,AT3G48730	AT3G48750
Chr3	10331000	10332000	Chr3	10356000	10357000	26000	4.41497	11	0.000121179	0.0446164	10331000	10332000	10356000	10357000	11	1	AT3G27870	AT3G27906
Chr3	15801000	15802000	Chr3	15826000	15827000	26000	4.41497	12	8.28184e-05	0.032465	15801000	15802000	15826000	15827000	12	1	AT3G44010,AT3G44020	AT3G44060,AT3G44070
Chr3	11048000	11049000	Chr3	11073000	11074000	26000	4.41497	17	3.10729e-07	0.00023571	11048000	11049000	11073000	11074000	17	1	AT3G29060	AT3G29080,AT3G29090
Chr3	10285000	10286000	Chr3	10310000	10311000	26000	4.41497	12	2.13414e-05	0.0101448	10285000	10286000	10310000	10311000	12	1	AT3G27750,AT3G27770	AT3G27810
Chr3	1660000	1661000	Chr3	1685000	1686000	26000	4.41497	11	5.28343e-05	0.0221351	1660000	1661000	1685000	1686000	11	1	AT3G05675,AT3G05680	AT3G05710,AT3G05720,AT3G05725,AT3G05727
Chr3	1161000	1162000	Chr3	1186000	1187000	26000	4.41497	18	7.49757e-07	0.000523964	1161000	1162000	1186000	1187000	18	1	AT3G04370,AT3G04380	AT3G04450,AT3G04460
Chr3	8139000	8140000	Chr3	8164000	8165000	26000	4.41497	17	1.76404e-08	1.70513e-05	8139000	8140000	8164000	8165000	17	1	AT3G22960	AT3G22990
Chr3	10495000	10496000	Chr3	10520000	10521000	26000	4.41497	12	3.66166e-05	0.0161637	10495000	10496000	10520000	10521000	12	1	AT3G28155	AT3G28210
Chr3	10328000	10329000	Chr3	10353000	10354000	26000	4.41497	13	5.60475e-05	0.0232843	10328000	10329000	10353000	10354000	13	1	AT3G27860,AT3G27865	AT3G27900
Chr3	21128000	21129000	Chr3	21153000	21154000	26000	4.41497	16	0.000102752	0.0389644	21128000	21129000	21153000	21154000	16	1	AT3G57062,AT3G57070,AT3G57072,AT3G57080,AT3G57090	AT3G57140,AT3G57150
Chr3	17599000	17600000	Chr3	17624000	17625000	26000	4.41497	17	6.92904e-06	0.00379166	17599000	17600000	17624000	17625000	17	1	AT3G47720,AT3G47730,AT3G47740	AT3G47770,AT3G47780
Chr3	22428000	22429000	Chr3	22453000	22454000	26000	4.41497	16	9.52868e-05	0.0366196	22428000	22429000	22453000	22454000	16	1	AT3G60670	AT3G60720,AT3G60730,AT3G60740,AT3G60750
Chr4	13002000	13003000	Chr4	13027000	13028000	26000	4.41497	19	1.93673e-09	2.19997e-06	13002000	13004000	13027000	13028000	32	1	AT4G25420,AT4G25430,AT4G25433	AT4G25500,AT4G25510
Chr4	9612000	9613000	Chr4	9637000	9638000	26000	4.41497	15	2.23394e-05	0.0105507	9612000	9613000	9637000	9639000	29	1	AT4G17100	AT4G17140
Chr4	14355000	14356000	Chr4	14380000	14381000	26000	4.41497	15	1.1892e-07	9.80745e-05	14355000	14356000	14379000	14381000	25	1	AT4G29130	AT4G29150,AT4G29160
Chr4	13261000	13262000	Chr4	13286000	13287000	26000	4.41497	15	4.72675e-05	0.0201194	13261000	13262000	13285000	13287000	27	1	AT4G26180	AT4G26230,AT4G26240
Chr4	2326000	2327000	Chr4	2351000	2352000	26000	4.41497	14	3.95551e-05	0.0172686	2326000	2327000	2351000	2352000	14	1	AT4G04610	AT4G04640
Chr4	5746000	5747000	Chr4	5771000	5772000	26000	4.41497	11	0.000137127	0.0495359	5746000	5747000	5771000	5772000	11	1	AT4G08960	AT4G08990
Chr4	567000	568000	Chr4	592000	593000	26000	4.41497	12	0.00011154	0.0416793	567000	568000	592000	593000	12	1	AT4G01370	NA
Chr4	14119000	14120000	Chr4	14144000	14145000	26000	4.41497	15	6.13613e-05	0.0251479	14119000	14120000	14144000	14145000	15	1	AT4G28556,AT4G28560,AT4G28564,AT4G28570	AT4G28650,AT4G28652
Chr4	9432000	9433000	Chr4	9457000	9458000	26000	4.41497	9	3.84115e-05	0.016846	9432000	9433000	9457000	9458000	9	1	AT4G16765	AT4G16800,AT4G16807
Chr4	11860000	11861000	Chr4	11885000	11886000	26000	4.41497	12	8.46524e-06	0.00453276	11860000	11861000	11885000	11886000	12	1	AT4G22530,AT4G22540	AT4G22570
Chr4	14329000	14330000	Chr4	14354000	14355000	26000	4.41497	15	3.58329e-05	0.0158646	14329000	14330000	14354000	14355000	15	1	AT4G29090	AT4G29130
Chr4	15281000	15282000	Chr4	15306000	15307000	26000	4.41497	25	6.381e-11	9.18958e-08	15281000	15282000	15306000	15307000	25	1	AT4G31520	AT4G31570,AT4G31580
Chr4	8054000	8055000	Chr4	8079000	8080000	26000	4.41497	14	7.18558e-05	0.0287858	8054000	8055000	8079000	8080000	14	1	AT4G13940	AT4G13980,AT4G13985,AT4G13990,AT4G13992
Chr4	10991000	10992000	Chr4	11016000	11017000	26000	4.41497	12	4.0843e-05	0.0177502	10991000	10992000	11016000	11017000	12	1	AT4G20360,AT4G20362	AT4G20410,AT4G20420,AT4G20430
Chr4	7138000	7139000	Chr4	7163000	7164000	26000	4.41497	13	6.53708e-05	0.0265116	7138000	7139000	7163000	7164000	13	1	AT4G11860	AT4G11920,AT4G11930,AT4G11940
Chr4	17055000	17056000	Chr4	17080000	17081000	26000	4.41497	12	4.67817e-05	0.0199399	17055000	17056000	17080000	17081000	12	1	AT4G36050,AT4G36060,AT4G36070	AT4G36090,AT4G36100
Chr4	4842000	4843000	Chr4	4867000	4868000	26000	4.41497	10	0.00011944	0.0440931	4842000	4843000	4867000	4868000	10	1	AT4G08025,AT4G08028	AT4G08035
Chr4	17649000	17650000	Chr4	17674000	17675000	26000	4.41497	13	2.19134e-06	0.0013657	17649000	17650000	17674000	17675000	13	1	AT4G37553	NA
Chr4	2328000	2329000	Chr4	2353000	2354000	26000	4.41497	12	1.16394e-05	0.0059942	2328000	2329000	2353000	2354000	12	1	AT4G04614,AT4G04620	AT4G04650
Chr5	8756000	8757000	Chr5	8781000	8782000	26000	4.41497	19	8.5556e-10	1.03216e-06	8754000	8758000	8775000	8782000	261	0.392857	AT5G25265	AT5G25300
Chr5	21609000	21610000	Chr5	21634000	21635000	26000	4.41497	22	9.05509e-12	1.47727e-08	21608000	21610000	21631000	21635000	136	0.875	AT5G53280	AT5G53300,AT5G53310
Chr5	18361000	18362000	Chr5	18386000	18387000	26000	4.41497	19	3.01883e-09	3.32707e-06	18360000	18362000	18386000	18388000	50	0.75	AT5G45310,AT5G45320	AT5G45360
Chr5	9164000	9165000	Chr5	9189000	9190000	26000	4.41497	18	6.25962e-08	5.43443e-05	9164000	9167000	9189000	9191000	41	0.5	AT5G26220	AT5G26240
Chr5	10045000	10046000	Chr5	10070000	10071000	26000	4.41497	21	7.43967e-10	9.07389e-07	10045000	10046000	10069000	10071000	34	1	AT5G28050	AT5G28060
Chr5	10238000	10239000	Chr5	10263000	10264000	26000	4.41497	14	2.35406e-09	2.63741e-06	10238000	10240000	10263000	10264000	27	1	AT5G28262	NA
Chr5	16184000	16185000	Chr5	16209000	16210000	26000	4.41497	14	7.66517e-07	0.000534284	16184000	16185000	16208000	16210000	27	1	AT5G40440,AT5G40450	AT5G40470
Chr5	26228000	26229000	Chr5	26253000	26254000	26000	4.41497	17	6.92311e-08	5.96186e-05	26228000	26230000	26253000	26254000	30	1	AT5G65630	AT5G65670
Chr5	20080000	20081000	Chr5	20105000	20106000	26000	4.41497	15	8.2954e-06	0.00445224	20080000	20081000	20105000	20106000	15	1	AT5G49500,AT5G49510	AT5G49540
Chr5	4189000	4190000	Chr5	4214000	4215000	26000	4.41497	12	9.45598e-05	0.0363798	4189000	4190000	4214000	4215000	12	1	NA	AT5G13210
Chr5	8240000	8241000	Chr5	8265000	8266000	26000	4.41497	13	7.84261e-05	0.0309963	8240000	8241000	8265000	8266000	13	1	AT5G24270	AT5G24290
Chr5	21662000	21663000	Chr5	21687000	21688000	26000	4.41497	13	9.38357e-06	0.00496414	21662000	21663000	21687000	21688000	13	1	AT5G53400	AT5G53440
Chr5	25157000	25158000	Chr5	25182000	25183000	26000	4.41497	12	9.79285e-05	0.0374516	25157000	25158000	25182000	25183000	12	1	AT5G62660	AT5G62690
Chr5	1073000	1074000	Chr5	1098000	1099000	26000	4.41497	13	8.28883e-05	0.0324891	1073000	1074000	1098000	1099000	13	1	AT5G03960,AT5G03970	AT5G04050
Chr5	17268000	17269000	Chr5	17293000	17294000	26000	4.41497	10	1.3151e-05	0.00665669	17268000	17269000	17293000	17294000	10	1	AT5G43050	AT5G43080
Chr5	5724000	5725000	Chr5	5749000	5750000	26000	4.41497	13	1.01856e-05	0.00533492	5724000	5725000	5749000	5750000	13	1	AT5G17370,AT5G17380	AT5G17420,AT5G17430,AT5G17440
Chr5	9409000	9410000	Chr5	9434000	9435000	26000	4.41497	11	9.71855e-05	0.0372114	9409000	9410000	9434000	9435000	11	1	AT5G26770	AT5G26820
Chr5	9490000	9491000	Chr5	9515000	9516000	26000	4.41497	10	0.000119036	0.0439625	9490000	9491000	9515000	9516000	10	1	AT5G26980	AT5G27010,AT5G27020,AT5G27030
Chr5	6375000	6376000	Chr5	6400000	6401000	26000	4.41497	17	1.52939e-09	1.76616e-06	6375000	6376000	6400000	6401000	17	1	AT5G19070	NA
Chr5	14008000	14009000	Chr5	14033000	14034000	26000	4.41497	12	2.96381e-05	0.0134568	14008000	14009000	14033000	14034000	12	1	AT5G35830,AT5G35840	AT5G35900,AT5G35910
Chr5	8039000	8040000	Chr5	8064000	8065000	26000	4.41497	12	3.89539e-05	0.0170416	8039000	8040000	8064000	8065000	12	1	AT5G23850	AT5G23900
Chr5	1880000	1881000	Chr5	1905000	1906000	26000	4.41497	11	2.08213e-05	0.00992661	1880000	1881000	1905000	1906000	11	1	AT5G06220	AT5G06260,AT5G06265
Chr5	20921000	20922000	Chr5	20946000	20947000	26000	4.41497	13	5.07616e-05	0.0213785	20921000	20922000	20946000	20947000	13	1	AT5G51490,AT5G51500,AT5G51510	AT5G51560
Chr5	13959000	13960000	Chr5	13984000	13985000	26000	4.41497	12	3.61531e-06	0.00213491	13959000	13960000	13984000	13985000	12	1	AT5G35790	NA
Chr5	22124000	22125000	Chr5	22149000	22150000	26000	4.41497	12	9.19227e-05	0.0355199	22124000	22125000	22149000	22150000	12	1	AT5G54490,AT5G54500	AT5G54520
Chr5	20650000	20651000	Chr5	20675000	20676000	26000	4.41497	24	1.06762e-13	2.21659e-10	20650000	20651000	20675000	20676000	24	1	AT5G50770,AT5G50780	AT5G50805,AT5G50810
Chr5	25423000	25424000	Chr5	25448000	25449000	26000	4.41497	14	7.07295e-05	0.0283961	25423000	25424000	25448000	25449000	14	1	AT5G63500,AT5G63510	AT5G63550
Chr1	25214000	25215000	Chr1	25238000	25239000	25000	4.39794	28	1.03963e-11	1.68794e-08	25212000	25217000	25237000	25239000	128	0.6	AT1G67328,AT1G67330	AT1G67360,AT1G67365,AT1G67370
Chr1	21438000	21439000	Chr1	21462000	21463000	25000	4.39794	17	2.46265e-06	0.00151631	21435000	21439000	21461000	21464000	98	0.5	AT1G57943	AT1G58025
Chr1	14149000	14150000	Chr1	14173000	14174000	25000	4.39794	21	6.85817e-10	8.41021e-07	14148000	14150000	14172000	14174000	45	0.75	NA	NA
Chr1	8000	9000	Chr1	32000	33000	25000	4.39794	21	1.25356e-09	1.4657e-06	8000	9000	31000	34000	50	1	AT1G01020	AT1G01050
Chr1	3766000	3767000	Chr1	3790000	3791000	25000	4.39794	20	5.51672e-06	0.00310762	3766000	3769000	3790000	3791000	47	1	AT1G11230,AT1G11240	AT1G11280
Chr1	17396000	17397000	Chr1	17420000	17421000	25000	4.39794	13	3.48537e-05	0.0154786	17396000	17398000	17420000	17421000	29	1	AT1G47410,AT1G47420	NA
Chr1	17253000	17254000	Chr1	17277000	17278000	25000	4.39794	21	5.37482e-10	6.69408e-07	17253000	17254000	17276000	17278000	40	1	AT1G46554	AT1G47056
Chr1	30225000	30226000	Chr1	30249000	30250000	25000	4.39794	21	8.90661e-09	9.06559e-06	30225000	30226000	30249000	30250000	21	1	AT1G80400	AT1G80460,AT1G80470
Chr1	21028000	21029000	Chr1	21052000	21053000	25000	4.39794	14	3.57529e-06	0.00211384	21028000	21029000	21052000	21053000	14	1	AT1G56180,AT1G56190	NA
Chr1	21024000	21025000	Chr1	21048000	21049000	25000	4.39794	15	0.000109691	0.0411128	21024000	21025000	21048000	21049000	15	1	AT1G56165,AT1G56170	AT1G56230
Chr1	28858000	28859000	Chr1	28882000	28883000	25000	4.39794	12	4.16517e-05	0.0180421	28858000	28859000	28882000	28883000	12	1	AT1G76870	AT1G76900
Chr1	12867000	12868000	Chr1	12891000	12892000	25000	4.39794	12	8.8636e-05	0.0344256	12867000	12868000	12891000	12892000	12	1	AT1G35150,AT1G35160	AT1G35190
Chr1	6437000	6438000	Chr1	6461000	6462000	25000	4.39794	20	8.01773e-09	8.23088e-06	6437000	6438000	6461000	6462000	20	1	AT1G18690,AT1G18700	AT1G18730,AT1G18735
Chr1	16851000	16852000	Chr1	16875000	16876000	25000	4.39794	15	3.96085e-07	0.000293837	16851000	16852000	16875000	16876000	15	1	AT1G44446	AT1G44608
Chr1	19566000	19567000	Chr1	19590000	19591000	25000	4.39794	12	5.63908e-05	0.0234132	19566000	19567000	19590000	19591000	12	1	AT1G52510,AT1G52520	AT1G52590,AT1G52600
Chr1	21435000	21436000	Chr1	21459000	21460000	25000	4.39794	15	9.70049e-06	0.00511112	21435000	21436000	21459000	21460000	15	1	AT1G57870,AT1G57906	AT1G58025
Chr1	7344000	7345000	Chr1	7368000	7369000	25000	4.39794	14	2.33667e-05	0.0109686	7344000	7345000	7368000	7369000	14	1	NA	NA
Chr1	11289000	11290000	Chr1	11313000	11314000	25000	4.39794	13	1.76016e-06	0.00112172	11289000	11290000	11313000	11314000	13	1	AT1G31520,AT1G31530,AT1G31540	AT1G31600,AT1G31620,AT1G31630
Chr1	13168000	13169000	Chr1	13192000	13193000	25000	4.39794	11	1.39483e-05	0.00699742	13168000	13169000	13192000	13193000	11	1	NA	AT1G35660
Chr1	17031000	17032000	Chr1	17055000	17056000	25000	4.39794	14	1.13474e-06	0.000758906	17031000	17032000	17055000	17056000	14	1	AT1G45050	NA
Chr1	26231000	26232000	Chr1	26255000	26256000	25000	4.39794	14	9.25776e-05	0.0357374	26231000	26232000	26255000	26256000	14	1	AT1G69730,AT1G69740	AT1G69780
Chr1	9567000	9568000	Chr1	9591000	9592000	25000	4.39794	13	7.95916e-05	0.0313804	9567000	9568000	9591000	9592000	13	1	AT1G27540,AT1G27550,AT1G27565,AT1G27570	AT1G27580,AT1G27590
Chr1	4523000	4524000	Chr1	4547000	4548000	25000	4.39794	15	5.9016e-05	0.0243419	4523000	4524000	4547000	4548000	15	1	AT1G13230,AT1G13240	AT1G13270,AT1G13280
Chr2	563000	564000	Chr2	587000	588000	25000	4.39794	18	2.00466e-07	0.000158243	558000	564000	584000	588000	204	0.458333	AT2G02180	AT2G02220
Chr2	560000	561000	Chr2	584000	585000	25000	4.39794	16	2.79983e-05	0.0128185	558000	564000	584000	588000	204	0.458333	AT2G02180	AT2G02220
Chr2	1359000	1360000	Chr2	1383000	1384000	25000	4.39794	15	5.91028e-06	0.00329967	1359000	1360000	1381000	1384000	43	1	AT2G04063,AT2G04066,AT2G04070,AT2G04080,AT2G04090	NA
Chr2	10585000	10586000	Chr2	10609000	10610000	25000	4.39794	26	3.07619e-11	4.65612e-08	10585000	10586000	10609000	10611000	41	1	AT2G24850	AT2G24940,AT2G24945
Chr2	8552000	8553000	Chr2	8576000	8577000	25000	4.39794	15	6.49809e-05	0.0263893	8551000	8553000	8575000	8577000	27	0.5	NA	AT2G19870
Chr2	497000	498000	Chr2	521000	522000	25000	4.39794	14	8.91997e-07	0.000613118	497000	499000	521000	522000	27	1	AT2G02060,AT2G02061	AT2G02080
Chr2	17325000	17326000	Chr2	17349000	17350000	25000	4.39794	20	4.09322e-08	3.687e-05	17325000	17326000	17349000	17350000	20	1	AT2G41530	AT2G41620,AT2G41616
Chr2	10801000	10802000	Chr2	10825000	10826000	25000	4.39794	13	1.13237e-05	0.00585294	10801000	10802000	10825000	10826000	13	1	AT2G25355,AT2G25360,AT2G25370	NA
Chr2	1822000	1823000	Chr2	1846000	1847000	25000	4.39794	17	1.25663e-06	0.00083048	1822000	1823000	1846000	1847000	17	1	NA	AT2G05120
Chr2	9514000	9515000	Chr2	9538000	9539000	25000	4.39794	17	3.44369e-06	0.0020449	9514000	9515000	9538000	9539000	17	1	AT2G22420,AT2G22425	AT2G22470,AT2G22475
Chr2	6540000	6541000	Chr2	6564000	6565000	25000	4.39794	14	3.59461e-07	0.000268666	6540000	6541000	6564000	6565000	14	1	AT2G15090	AT2G15128,AT2G15130
Chr2	19090000	19091000	Chr2	19114000	19115000	25000	4.39794	14	6.19188e-05	0.0253363	19090000	19091000	19114000	19115000	14	1	AT2G46505,AT2G46510	AT2G46550
Chr2	17236000	17237000	Chr2	17260000	17261000	25000	4.39794	22	1.61729e-07	0.000130284	17236000	17237000	17260000	17261000	22	1	AT2G41360	AT2G41400
Chr2	12673000	12674000	Chr2	12697000	12698000	25000	4.39794	16	6.77568e-05	0.0273651	12673000	12674000	12697000	12698000	16	1	AT2G29640,AT2G29650	AT2G29700
Chr2	11825000	11826000	Chr2	11849000	11850000	25000	4.39794	14	3.21092e-06	0.00192091	11825000	11826000	11849000	11850000	14	1	AT2G27760	AT2G27790,AT2G27800
Chr2	6034000	6035000	Chr2	6058000	6059000	25000	4.39794	11	0.000120483	0.0444084	6034000	6035000	6058000	6059000	11	1	AT2G14247	AT2G14290
Chr2	7109000	7110000	Chr2	7133000	7134000	25000	4.39794	12	9.97817e-05	0.0380272	7109000	7110000	7133000	7134000	12	1	NA	AT2G16460
Chr2	1588000	1589000	Chr2	1612000	1613000	25000	4.39794	26	6.26608e-14	1.33739e-10	1588000	1589000	1612000	1613000	26	1	AT2G04550	AT2G04620,AT2G04622
Chr2	7910000	7911000	Chr2	7934000	7935000	25000	4.39794	22	6.66535e-09	6.9527e-06	7910000	7911000	7934000	7935000	22	1	AT2G18180	AT2G18230
Chr2	9774000	9775000	Chr2	9798000	9799000	25000	4.39794	21	2.40148e-06	0.00148311	9774000	9775000	9798000	9799000	21	1	AT2G22950,AT2G22955,AT2G22960,AT2G22970	AT2G23010
Chr3	11052000	11053000	Chr3	11076000	11077000	25000	4.39794	22	6.85874e-10	8.41021e-07	11051000	11053000	11072000	11078000	215	0.833333	AT3G29075	AT3G29095,AT3G29100
Chr3	11011000	11012000	Chr3	11035000	11036000	25000	4.39794	26	3.71416e-14	8.18794e-11	11010000	11013000	11033000	11036000	122	0.777778	AT3G29030	AT3G29035,AT3G29040,AT3G29050
Chr3	16584000	16585000	Chr3	16608000	16609000	25000	4.39794	34	1.96479e-18	7.26505e-15	16584000	16585000	16607000	16611000	111	1	AT3G45248,AT3G45252	NA
Chr3	18052000	18053000	Chr3	18076000	18077000	25000	4.39794	31	2.001e-15	5.16424e-12	18049000	18053000	18076000	18077000	78	1	AT3G48740	AT3G48760
Chr3	15842000	15843000	Chr3	15866000	15867000	25000	4.39794	15	4.64498e-06	0.00267152	15842000	15843000	15866000	15867000	15	1	AT3G44080,AT3G44090,AT3G44091	AT3G44100
Chr3	15777000	15778000	Chr3	15801000	15802000	25000	4.39794	16	0.000132273	0.0480368	15777000	15778000	15801000	15802000	16	1	AT3G43970,AT3G43980,AT3G43990	AT3G44010,AT3G44020
Chr3	11006000	11007000	Chr3	11030000	11031000	25000	4.39794	26	1.11592e-11	1.80388e-08	11006000	11007000	11030000	11031000	26	1	AT3G28990,AT3G29000,AT3G29010,AT3G29020	AT3G29033,AT3G29036,AT3G29034
Chr3	8979000	8980000	Chr3	9003000	9004000	25000	4.39794	14	1.06028e-06	0.000714701	8979000	8980000	9003000	9004000	14	1	AT3G24612,AT3G24614,AT3G24615,AT3G24620	AT3G24650,AT3G24660
Chr3	10095000	10096000	Chr3	10119000	10120000	25000	4.39794	19	6.4486e-08	5.58167e-05	10095000	10096000	10119000	10120000	19	1	AT3G27325	AT3G27330
Chr3	3106000	3107000	Chr3	3130000	3131000	25000	4.39794	9	5.2513e-05	0.0220171	3106000	3107000	3130000	3131000	9	1	AT3G10070	AT3G10120,AT3G10130
Chr3	8259000	8260000	Chr3	8283000	8284000	25000	4.39794	16	7.742e-06	0.00418708	8259000	8260000	8283000	8284000	16	1	AT3G23160	AT3G23210
Chr3	10539000	10540000	Chr3	10563000	10564000	25000	4.39794	9	8.8698e-05	0.0344433	10539000	10540000	10563000	10564000	9	1	AT3G28270,AT3G28280	NA
Chr3	3639000	3640000	Chr3	3663000	3664000	25000	4.39794	18	1.74477e-08	1.68692e-05	3639000	3640000	3663000	3664000	18	1	AT3G11550,AT3G11560	AT3G11590,AT3G11591,AT3G11600
Chr3	6477000	6478000	Chr3	6501000	6502000	25000	4.39794	14	9.32588e-05	0.0359683	6477000	6478000	6501000	6502000	14	1	AT3G18779,AT3G18780,AT3G18790	AT3G18850,AT3G18860
Chr3	16732000	16733000	Chr3	16756000	16757000	25000	4.39794	14	0.000127443	0.0465546	16732000	16733000	16756000	16757000	14	1	AT3G45560,AT3G45570,AT3G45577,AT3G45580,AT3G45590	AT3G45638,AT3G45640
Chr3	9313000	9314000	Chr3	9337000	9338000	25000	4.39794	16	7.47216e-06	0.00405321	9313000	9314000	9337000	9338000	16	1	AT3G25610,AT3G25620	AT3G25640,AT3G25650,AT3G25655,AT3G25660
Chr3	6429000	6430000	Chr3	6453000	6454000	25000	4.39794	13	2.90524e-05	0.013231	6429000	6430000	6453000	6454000	13	1	AT3G18680,AT3G18690	AT3G18720,AT3G18730,AT3G18740
Chr4	9744000	9745000	Chr4	9768000	9769000	25000	4.39794	19	3.74415e-08	3.39618e-05	9741000	9745000	9767000	9769000	75	0.625	AT4G17470	AT4G17510
Chr4	711000	712000	Chr4	735000	736000	25000	4.39794	16	8.79875e-09	8.97107e-06	711000	712000	734000	737000	48	1	AT4G01660,AT4G01670	AT4G01710
Chr4	14351000	14352000	Chr4	14375000	14376000	25000	4.39794	22	5.56112e-10	6.91171e-07	14350000	14352000	14375000	14377000	36	0.5	AT4G29120	NA
Chr4	7731000	7732000	Chr4	7755000	7756000	25000	4.39794	16	3.32819e-06	0.00198359	7731000	7732000	7754000	7756000	33	1	AT4G13260,AT4G13265,AT4G13270	AT4G13300,AT4G13310,AT4G13320,AT4G13330
Chr4	1445000	1446000	Chr4	1469000	1470000	25000	4.39794	11	1.27442e-05	0.00647906	1444000	1446000	1469000	1470000	22	1	AT4G03292,AT4G03295	AT4G03340,AT4G03350,AT4G03360
Chr4	17761000	17762000	Chr4	17785000	17786000	25000	4.39794	14	1.22299e-05	0.0062556	17760000	17762000	17785000	17786000	24	1	NA	AT4G37820
Chr4	7298000	7299000	Chr4	7322000	7323000	25000	4.39794	14	6.67942e-05	0.0270156	7298000	7299000	7322000	7323000	14	1	AT4G12270	AT4G12340,AT4G12350
Chr4	2543000	2544000	Chr4	2567000	2568000	25000	4.39794	17	0.00011247	0.0419442	2543000	2544000	2567000	2568000	17	1	AT4G04970,AT4G04972,AT4G04980,AT4G04985	AT4G05010
Chr4	7879000	7880000	Chr4	7903000	7904000	25000	4.39794	16	1.65831e-08	1.61134e-05	7879000	7880000	7903000	7904000	16	1	AT4G13555,AT4G13560,AT4G13570,AT4G13564,AT4G13572	AT4G13590,AT4G13600
Chr4	10984000	10985000	Chr4	11008000	11009000	25000	4.39794	16	2.82668e-07	0.000216536	10984000	10985000	11008000	11009000	16	1	AT4G20330,AT4G20340	AT4G20390,AT4G20400
Chr4	13009000	13010000	Chr4	13033000	13034000	25000	4.39794	15	2.31459e-05	0.0108782	13009000	13010000	13033000	13034000	15	1	AT4G25440,AT4G25450	AT4G25520
Chr4	1580000	1581000	Chr4	1604000	1605000	25000	4.39794	13	0.000101297	0.0384975	1580000	1581000	1604000	1605000	13	1	AT4G03560	AT4G03600,AT4G03610,AT4G03620
Chr4	2693000	2694000	Chr4	2717000	2718000	25000	4.39794	13	1.72227e-05	0.00840832	2693000	2694000	2717000	2718000	13	1	AT4G05210,AT4G05220,AT4G05230,AT4G05240,AT4G05250,AT4G05260	NA
Chr4	5828000	5829000	Chr4	5852000	5853000	25000	4.39794	13	2.9604e-05	0.0134436	5828000	5829000	5852000	5853000	13	1	AT4G09150	AT4G09190,AT4G09200
Chr4	2587000	2588000	Chr4	2611000	2612000	25000	4.39794	17	1.16755e-06	0.000778302	2587000	2588000	2611000	2612000	17	1	AT4G05048,AT4G05050	AT4G05090,AT4G05091
Chr4	17173000	17174000	Chr4	17197000	17198000	25000	4.39794	15	0.000107038	0.0403041	17173000	17174000	17197000	17198000	15	1	AT4G36290,AT4G36350	AT4G36390,AT4G36400
Chr4	18555000	18556000	Chr4	18579000	18580000	25000	4.39794	18	7.20871e-09	7.46441e-06	18555000	18556000	18579000	18580000	18	1	AT4G40020,AT4G40030	AT4G40085,AT4G40080
Chr4	14807000	14808000	Chr4	14831000	14832000	25000	4.39794	18	6.09669e-05	0.0250179	14807000	14808000	14831000	14832000	18	1	AT4G30230,AT4G30240	AT4G30290,AT4G30300,AT4G30310,AT4G30320
Chr4	11350000	11351000	Chr4	11374000	11375000	25000	4.39794	19	1.06896e-05	0.00556256	11350000	11351000	11374000	11375000	19	1	AT4G21330	AT4G21362
Chr5	15910000	15911000	Chr5	15934000	15935000	25000	4.39794	12	7.5258e-07	0.000525843	15910000	15916000	15927000	15935000	428	0.354167	NA	AT5G39790
Chr5	14541000	14542000	Chr5	14565000	14566000	25000	4.39794	26	1.5385e-11	2.43286e-08	14540000	14542000	14565000	14567000	50	0.75	AT5G36890	AT5G36920,AT5G36925
Chr5	14792000	14793000	Chr5	14816000	14817000	25000	4.39794	11	1.76352e-05	0.00858394	14792000	14794000	14816000	14817000	23	1	AT5G37340,AT5G37350,AT5G37351	AT5G37370,AT5G37380
Chr5	14253000	14254000	Chr5	14277000	14278000	25000	4.39794	17	9.49644e-08	7.97992e-05	14253000	14254000	14276000	14278000	29	1	AT5G36210,AT5G36220	AT5G36230,AT5G36240
Chr5	19440000	19441000	Chr5	19464000	19465000	25000	4.39794	12	0.000102217	0.038792	19440000	19441000	19464000	19465000	12	1	AT5G47990,AT5G48000	AT5G48020
Chr5	8547000	8548000	Chr5	8571000	8572000	25000	4.39794	11	4.7764e-05	0.0202974	8547000	8548000	8571000	8572000	11	1	AT5G24870,AT5G24879	NA
Chr5	22633000	22634000	Chr5	22657000	22658000	25000	4.39794	13	0.000138524	0.049964	22633000	22634000	22657000	22658000	13	1	NA	AT5G55940,AT5G55950
Chr5	16863000	16864000	Chr5	16887000	16888000	25000	4.39794	12	7.29776e-05	0.0291586	16863000	16864000	16887000	16888000	12	1	AT5G42203	AT5G42232,AT5G42235
Chr5	21261000	21262000	Chr5	21285000	21286000	25000	4.39794	16	2.67135e-05	0.0123005	21261000	21262000	21285000	21286000	16	1	AT5G52350,AT5G52355,AT5G52360,AT5G52370,AT5G52380	AT5G52430,AT5G52440
Chr5	9646000	9647000	Chr5	9670000	9671000	25000	4.39794	16	8.70381e-06	0.00464006	9646000	9647000	9670000	9671000	16	1	NA	AT5G27380,AT5G27395
Chr5	3000000	3001000	Chr5	3024000	3025000	25000	4.39794	17	4.74815e-05	0.0201939	3000000	3001000	3024000	3025000	17	1	AT5G09680,AT5G09690	AT5G09740,AT5G09750
Chr5	17966000	17967000	Chr5	17990000	17991000	25000	4.39794	12	0.000103997	0.0393544	17966000	17967000	17990000	17991000	12	1	AT5G44570,AT5G44572	AT5G44600
Chr5	9315000	9316000	Chr5	9339000	9340000	25000	4.39794	13	0.000116063	0.0430246	9315000	9316000	9339000	9340000	13	1	AT5G26690,AT5G26680	AT5G26650
Chr5	25235000	25236000	Chr5	25259000	25260000	25000	4.39794	13	5.47928e-05	0.0228399	25235000	25236000	25259000	25260000	13	1	AT5G62820,AT5G62830,AT5G62840,AT5G62850,AT5G62848,AT5G62860,AT5G62865	NA
Chr5	17782000	17783000	Chr5	17806000	17807000	25000	4.39794	12	1.13556e-05	0.00586593	17782000	17783000	17806000	17807000	12	1	NA	AT5G44210
Chr5	19525000	19526000	Chr5	19549000	19550000	25000	4.39794	14	5.90991e-06	0.00329967	19525000	19526000	19549000	19550000	14	1	NA	AT5G48200,AT5G48205,AT5G48210,AT5G48220
Chr5	1476000	1477000	Chr5	1500000	1501000	25000	4.39794	22	1.11489e-09	1.31703e-06	1476000	1477000	1500000	1501000	22	1	AT5G05000,AT5G05010	AT5G05080
Chr5	14618000	14619000	Chr5	14642000	14643000	25000	4.39794	12	9.19953e-05	0.0355427	14618000	14619000	14642000	14643000	12	1	AT5G37000	AT5G37055,AT5G37060
Chr5	8979000	8980000	Chr5	9003000	9004000	25000	4.39794	13	5.72646e-05	0.0237278	8979000	8980000	9003000	9004000	13	1	AT5G25790,AT5G25800	AT5G25830,AT5G25840
Chr5	17171000	17172000	Chr5	17195000	17196000	25000	4.39794	15	4.20796e-05	0.0181971	17171000	17172000	17195000	17196000	15	1	AT5G42820,AT5G42825	AT5G42890,AT5G42895,AT5G42900,AT5G42905
Chr5	26239000	26240000	Chr5	26263000	26264000	25000	4.39794	14	2.82131e-05	0.0129032	26239000	26240000	26263000	26264000	14	1	AT5G65640,AT5G65650	AT5G65683,AT5G65690
Chr5	10615000	10616000	Chr5	10639000	10640000	25000	4.39794	21	4.3565e-10	5.51144e-07	10615000	10616000	10639000	10640000	21	1	NA	AT5G28640
Chr5	821000	822000	Chr5	845000	846000	25000	4.39794	11	6.10117e-05	0.0250257	821000	822000	845000	846000	11	1	AT5G03360	AT5G03415,AT5G03420
Chr5	13831000	13832000	Chr5	13855000	13856000	25000	4.39794	15	1.41814e-05	0.00710017	13831000	13832000	13855000	13856000	15	1	AT5G35630	AT5G35660
Chr5	22323000	22324000	Chr5	22347000	22348000	25000	4.39794	12	3.50573e-05	0.0155619	22323000	22324000	22347000	22348000	12	1	AT5G55020	AT5G55070
Chr5	23345000	23346000	Chr5	23369000	23370000	25000	4.39794	13	2.95761e-05	0.0134325	23345000	23346000	23369000	23370000	13	1	AT5G57640,AT5G57650	NA
Chr5	21724000	21725000	Chr5	21748000	21749000	25000	4.39794	19	1.09877e-06	0.000737257	21724000	21725000	21748000	21749000	19	1	AT5G53490	AT5G53530
Chr1	9320000	9321000	Chr1	9343000	9344000	24000	4.38021	15	3.28854e-05	0.014718	9320000	9323000	9343000	9345000	60	0.666667	AT1G26900	AT1G26940
Chr1	28305000	28306000	Chr1	28328000	28329000	24000	4.38021	20	9.60364e-08	8.06477e-05	28305000	28306000	28327000	28329000	33	1	AT1G75420	AT1G75460
Chr1	5220000	5221000	Chr1	5243000	5244000	24000	4.38021	17	0.000126453	0.0462364	5220000	5221000	5243000	5244000	17	1	AT1G15160,AT1G15165,AT1G15170	AT1G15230,AT1G15240
Chr1	12047000	12048000	Chr1	12070000	12071000	24000	4.38021	20	8.93206e-07	0.000613841	12047000	12048000	12070000	12071000	20	1	AT1G33230	AT1G33270,AT1G33280,AT1G33290
Chr1	14002000	14003000	Chr1	14025000	14026000	24000	4.38021	15	1.02006e-06	0.000690764	14002000	14003000	14025000	14026000	15	1	NA	AT1G36960,AT1G36970,AT1G36980
Chr1	10000	11000	Chr1	33000	34000	24000	4.38021	15	0.00011541	0.0428271	10000	11000	33000	34000	15	1	NA	AT1G01050,AT1G01060
Chr1	28743000	28744000	Chr1	28766000	28767000	24000	4.38021	20	5.71772e-05	0.0237049	28743000	28744000	28766000	28767000	20	1	AT1G76590	AT1G76640,AT1G76650
Chr1	5686000	5687000	Chr1	5709000	5710000	24000	4.38021	15	9.9182e-06	0.00521275	5686000	5687000	5709000	5710000	15	1	AT1G16630,AT1G16635,AT1G16640	AT1G16690,AT1G16700
Chr1	25023000	25024000	Chr1	25046000	25047000	24000	4.38021	19	1.81049e-07	0.000144263	25023000	25024000	25046000	25047000	19	1	AT1G67040	AT1G67080
Chr1	11654000	11655000	Chr1	11677000	11678000	24000	4.38021	12	0.000101171	0.0384628	11654000	11655000	11677000	11678000	12	1	AT1G32290,AT1G32300,AT1G32310,AT1G32320	AT1G32360,AT1G32361,AT1G32370
Chr1	1564000	1565000	Chr1	1587000	1588000	24000	4.38021	18	3.499e-06	0.00207362	1564000	1565000	1587000	1588000	18	1	AT1G05350,AT1G05360	AT1G05410,AT1G05420
Chr1	4532000	4533000	Chr1	4555000	4556000	24000	4.38021	16	7.82672e-05	0.0309433	4532000	4533000	4555000	4556000	16	1	NA	NA
Chr1	16665000	16666000	Chr1	16688000	16689000	24000	4.38021	11	7.05206e-05	0.0283225	16665000	16666000	16688000	16689000	11	1	AT1G43950	AT1G43980
Chr1	22057000	22058000	Chr1	22080000	22081000	24000	4.38021	16	3.23948e-05	0.0145294	22057000	22058000	22080000	22081000	16	1	AT1G59910,AT1G59920,AT1G59930	AT1G59980
Chr1	20416000	20417000	Chr1	20439000	20440000	24000	4.38021	14	1.54895e-05	0.00766868	20416000	20417000	20439000	20440000	14	1	AT1G54700,AT1G54710	AT1G54775,AT1G54780
Chr1	12239000	12240000	Chr1	12262000	12263000	24000	4.38021	15	1.91217e-05	0.00921346	12239000	12240000	12262000	12263000	15	1	NA	AT1G33800,AT1G33810,AT1G33811
Chr1	6443000	6444000	Chr1	6466000	6467000	24000	4.38021	14	1.26785e-05	0.0064524	6443000	6444000	6466000	6467000	14	1	AT1G18700	AT1G18745,AT1G18750,AT1G18760,AT1G18770,AT1G18773
Chr1	20227000	20228000	Chr1	20250000	20251000	24000	4.38021	14	0.000102443	0.0388627	20227000	20228000	20250000	20251000	14	1	AT1G54170,AT1G54180	AT1G54220,AT1G54230
Chr1	16941000	16942000	Chr1	16964000	16965000	24000	4.38021	12	1.90705e-05	0.00919052	16941000	16942000	16964000	16965000	12	1	AT1G44835	AT1G44890
Chr1	21311000	21312000	Chr1	21334000	21335000	24000	4.38021	23	3.01395e-08	2.78452e-05	21311000	21312000	21334000	21335000	23	1	AT1G57540,AT1G57550	AT1G57600
Chr1	5590000	5591000	Chr1	5613000	5614000	24000	4.38021	13	3.91399e-05	0.0171124	5590000	5591000	5613000	5614000	13	1	AT1G16340,AT1G16350	AT1G16400,AT1G16410,AT1G16420
Chr1	20511000	20512000	Chr1	20534000	20535000	24000	4.38021	21	1.94959e-09	2.21328e-06	20511000	20512000	20534000	20535000	21	1	AT1G54960,AT1G54970,AT1G54980,AT1G54990	AT1G55020,AT1G55030,AT1G55040,AT1G55045,AT1G55050
Chr1	28855000	28856000	Chr1	28878000	28879000	24000	4.38021	16	4.18473e-07	0.000308795	28855000	28856000	28878000	28879000	16	1	AT1G76830,AT1G76840,AT1G76850,AT1G76860	NA
Chr1	11194000	11195000	Chr1	11217000	11218000	24000	4.38021	15	4.1359e-05	0.0179394	11194000	11195000	11217000	11218000	15	1	AT1G31300,AT1G31310	AT1G31335,AT1G31340
Chr1	23072000	23073000	Chr1	23095000	23096000	24000	4.38021	17	4.27396e-05	0.0184425	23072000	23073000	23095000	23096000	17	1	AT1G62370	AT1G62410,AT1G62421,AT1G62422
Chr2	2737000	2738000	Chr2	2760000	2761000	24000	4.38021	19	3.4713e-11	5.2186e-08	2735000	2738000	2759000	2762000	73	0.555556	NA	AT2G06845
Chr2	2436000	2437000	Chr2	2459000	2460000	24000	4.38021	24	1.61037e-13	3.27265e-10	2436000	2437000	2457000	2460000	52	1	AT2G06210	AT2G06255
Chr2	19458000	19459000	Chr2	19481000	19482000	24000	4.38021	16	2.70751e-07	0.00020831	19457000	19459000	19480000	19482000	42	0.75	AT2G47420,AT2G47430	AT2G47470
Chr2	16539000	16540000	Chr2	16562000	16563000	24000	4.38021	20	2.31626e-06	0.00143652	16538000	16540000	16562000	16563000	34	1	AT2G39675,AT2G39681	AT2G39710
Chr2	290000	291000	Chr2	313000	314000	24000	4.38021	26	7.48408e-11	1.06754e-07	290000	291000	313000	314000	26	1	AT2G01660	AT2G01690
Chr2	12100000	12101000	Chr2	12123000	12124000	24000	4.38021	19	2.92168e-06	0.00176512	12100000	12101000	12123000	12124000	19	1	AT2G28330,AT2G28340	AT2G28355
Chr2	7103000	7104000	Chr2	7126000	7127000	24000	4.38021	19	1.85314e-05	0.0089657	7103000	7104000	7126000	7127000	19	1	AT2G16400	AT2G16440
Chr2	1538000	1539000	Chr2	1561000	1562000	24000	4.38021	26	2.6141e-11	4.01295e-08	1538000	1539000	1561000	1562000	26	1	AT2G04425,AT2G04430	AT2G04480
Chr2	1677000	1678000	Chr2	1700000	1701000	24000	4.38021	12	1.99955e-05	0.00958284	1677000	1678000	1700000	1701000	12	1	AT2G04780	AT2G04842
Chr2	629000	630000	Chr2	652000	653000	24000	4.38021	17	1.75982e-05	0.00856645	629000	630000	652000	653000	17	1	AT2G02390	AT2G02470
Chr2	7485000	7486000	Chr2	7508000	7509000	24000	4.38021	16	6.74259e-05	0.02724	7485000	7486000	7508000	7509000	16	1	AT2G17200,AT2G17210	AT2G17260,AT2G17265
Chr2	8239000	8240000	Chr2	8262000	8263000	24000	4.38021	17	4.03154e-06	0.00235335	8239000	8240000	8262000	8263000	17	1	AT2G18990,AT2G19000,AT2G19010,AT2G19020,AT2G19030,AT2G19040	AT2G19050,AT2G19060,AT2G19070,AT2G19080
Chr2	8269000	8270000	Chr2	8292000	8293000	24000	4.38021	16	6.11587e-06	0.00339992	8269000	8270000	8292000	8293000	16	1	NA	AT2G19120
Chr2	11888000	11889000	Chr2	11911000	11912000	24000	4.38021	14	3.23704e-05	0.0145218	11888000	11889000	11911000	11912000	14	1	AT2G27920	AT2G27960
Chr2	632000	633000	Chr2	655000	656000	24000	4.38021	14	4.78165e-05	0.0203175	632000	633000	655000	656000	14	1	AT2G02400,AT2G02410	NA
Chr2	6960000	6961000	Chr2	6983000	6984000	24000	4.38021	14	0.000136451	0.0493375	6960000	6961000	6983000	6984000	14	1	AT2G16005,AT2G16015	AT2G16018,AT2G16019,AT2G16020,AT2G16030,AT2G16040,AT2G16050,AT2G16060,AT2G16070,AT2G16090
Chr2	818000	819000	Chr2	841000	842000	24000	4.38021	13	2.92436e-05	0.0133052	818000	819000	841000	842000	13	1	AT2G02835,AT2G02840,AT2G02850	AT2G02860,AT2G02870,AT2G02880
Chr2	17177000	17178000	Chr2	17200000	17201000	24000	4.38021	18	2.48705e-07	0.000192779	17177000	17178000	17200000	17201000	18	1	AT2G41220	AT2G41230,AT2G41231,AT2G41233,AT2G41240,AT2G41250
Chr2	9881000	9882000	Chr2	9904000	9905000	24000	4.38021	16	6.10965e-05	0.0250539	9881000	9882000	9904000	9905000	16	1	AT2G23200,AT2G23210,AT2G23220	AT2G23230,AT2G23240,AT2G23250,AT2G23260,AT2G23270,AT2G23290
Chr2	52000	53000	Chr2	75000	76000	24000	4.38021	10	6.44136e-05	0.0262082	52000	53000	75000	76000	10	1	NA	AT2G01050,AT2G01060,AT2G01070
Chr2	7221000	7222000	Chr2	7244000	7245000	24000	4.38021	15	2.00511e-05	0.00960474	7221000	7222000	7244000	7245000	15	1	AT2G16660	AT2G16700
Chr2	9696000	9697000	Chr2	9719000	9720000	24000	4.38021	17	2.46935e-06	0.00151996	9696000	9697000	9719000	9720000	17	1	AT2G22790	AT2G22810
Chr2	2901000	2902000	Chr2	2924000	2925000	24000	4.38021	12	2.6245e-05	0.0121121	2901000	2902000	2924000	2925000	12	1	AT2G06990,AT2G07000	AT2G07050
Chr2	15928000	15929000	Chr2	15951000	15952000	24000	4.38021	12	0.000136508	0.0493478	15928000	15929000	15951000	15952000	12	1	AT2G38070	AT2G38100,AT2G38110
Chr2	14383000	14384000	Chr2	14406000	14407000	24000	4.38021	15	2.64754e-05	0.0122053	14383000	14384000	14406000	14407000	15	1	AT2G34050,AT2G34060	AT2G34100,AT2G34120,AT2G34123
Chr2	10431000	10432000	Chr2	10454000	10455000	24000	4.38021	11	7.45441e-05	0.0296975	10431000	10432000	10454000	10455000	11	1	AT2G24560	AT2G24600,AT2G24610,AT2G24615,AT2G24617,AT2G24620
Chr3	11787000	11788000	Chr3	11810000	11811000	24000	4.38021	23	1.70594e-14	3.93482e-11	11785000	11791000	11810000	11814000	363	0.75	NA	AT3G30180
Chr3	11790000	11791000	Chr3	11813000	11814000	24000	4.38021	20	1.62296e-10	2.19386e-07	11785000	11791000	11810000	11814000	363	0.75	NA	AT3G30180
Chr3	4824000	4825000	Chr3	4847000	4848000	24000	4.38021	18	2.31072e-10	3.054e-07	4824000	4826000	4846000	4853000	168	0.785714	AT3G14420,AT3G14430	NA
Chr3	10328000	10329000	Chr3	10351000	10352000	24000	4.38021	20	6.04608e-10	7.47621e-07	10328000	10332000	10350000	10354000	118	0.5	AT3G27860,AT3G27865	AT3G27890
Chr3	8589000	8590000	Chr3	8612000	8613000	24000	4.38021	17	2.32817e-06	0.00144345	8589000	8591000	8610000	8613000	78	0.833333	AT3G23810	AT3G23840,AT3G23850,AT3G23860,AT3G23870,AT3G23880
Chr3	1956000	1957000	Chr3	1979000	1980000	24000	4.38021	20	1.14704e-08	1.14562e-05	1954000	1957000	1979000	1981000	54	0.5	AT3G06420,AT3G06430	AT3G06450
Chr3	22635000	22636000	Chr3	22658000	22659000	24000	4.38021	17	6.30029e-06	0.00349059	22635000	22636000	22657000	22659000	35	1	AT3G61150,AT3G61160,AT3G61170	AT3G61200,AT3G61210,AT3G61220,AT3G61230,AT3G61240
Chr3	17397000	17398000	Chr3	17420000	17421000	24000	4.38021	17	6.09187e-08	5.30266e-05	17397000	17399000	17420000	17421000	27	1	NA	AT3G47290
Chr3	10401000	10402000	Chr3	10424000	10425000	24000	4.38021	17	8.08656e-10	9.80427e-07	10400000	10402000	10424000	10425000	29	1	AT3G27999,AT3G28007	AT3G28030
Chr3	20643000	20644000	Chr3	20666000	20667000	24000	4.38021	14	1.4085e-07	0.000114869	20643000	20645000	20666000	20667000	28	1	NA	AT3G55672,AT3G55677,AT3G55680,AT3G55690
Chr3	22314000	22315000	Chr3	22337000	22338000	24000	4.38021	12	8.35313e-05	0.0327131	22314000	22315000	22337000	22338000	12	1	AT3G60360,AT3G60370	AT3G60420,AT3G60440,AT3G60450
Chr3	18806000	18807000	Chr3	18829000	18830000	24000	4.38021	17	1.75949e-06	0.00112155	18806000	18807000	18829000	18830000	17	1	AT3G50640,AT3G50650	AT3G50670,AT3G50674
Chr3	16471000	16472000	Chr3	16494000	16495000	24000	4.38021	18	5.35896e-07	0.000385777	16471000	16472000	16494000	16495000	18	1	AT3G45030	AT3G45090
Chr3	15344000	15345000	Chr3	15367000	15368000	24000	4.38021	16	3.57974e-07	0.000267642	15344000	15345000	15367000	15368000	16	1	AT3G43420	AT3G43440
Chr3	19521000	19522000	Chr3	19544000	19545000	24000	4.38021	14	1.27025e-05	0.00646166	19521000	19522000	19544000	19545000	14	1	AT3G52630,AT3G52640,AT3G52660,AT3G52670	AT3G52730,AT3G52740
Chr3	23108000	23109000	Chr3	23131000	23132000	24000	4.38021	10	0.000132573	0.04813	23108000	23109000	23131000	23132000	10	1	AT3G62470	AT3G62528,AT3G62530,AT3G62540,AT3G62550
Chr3	9848000	9849000	Chr3	9871000	9872000	24000	4.38021	16	1.40939e-05	0.00706265	9848000	9849000	9871000	9872000	16	1	AT3G26750,AT3G26760,AT3G26770,AT3G26780	AT3G26812,AT3G26813,AT3G26815,AT3G26816,AT3G26818,AT3G26819
Chr3	6934000	6935000	Chr3	6957000	6958000	24000	4.38021	14	0.000122902	0.045116	6934000	6935000	6957000	6958000	14	1	AT3G19930	NA
Chr3	16135000	16136000	Chr3	16158000	16159000	24000	4.38021	13	1.39253e-05	0.00698901	16135000	16136000	16158000	16159000	13	1	AT3G44550	AT3G44570,AT3G44580
Chr3	16070000	16071000	Chr3	16093000	16094000	24000	4.38021	15	5.42464e-05	0.022645	16070000	16071000	16093000	16094000	15	1	AT3G44440	AT3G44480,AT3G44490
Chr3	22353000	22354000	Chr3	22376000	22377000	24000	4.38021	19	6.19241e-07	0.000440232	22353000	22354000	22376000	22377000	19	1	AT3G60500	NA
Chr3	21128000	21129000	Chr3	21151000	21152000	24000	4.38021	17	1.67883e-05	0.00822837	21128000	21129000	21151000	21152000	17	1	AT3G57062,AT3G57070,AT3G57072,AT3G57080,AT3G57090	AT3G57140
Chr3	1048000	1049000	Chr3	1071000	1072000	24000	4.38021	12	4.14363e-05	0.0179649	1048000	1049000	1071000	1072000	12	1	AT3G04040	AT3G04080,AT3G04090,AT3G04100
Chr4	8310000	8311000	Chr4	8333000	8334000	24000	4.38021	26	7.617e-16	2.07588e-12	8309000	8313000	8330000	8335000	206	0.5	AT4G14450,AT4G14455	AT4G14490
Chr4	9432000	9433000	Chr4	9455000	9456000	24000	4.38021	11	6.60198e-05	0.026739	9432000	9433000	9451000	9456000	117	1	AT4G16765	AT4G16800
Chr4	17393000	17394000	Chr4	17416000	17417000	24000	4.38021	16	1.08411e-06	0.000728868	17393000	17394000	17416000	17418000	28	1	AT4G36910	AT4G36930,AT4G36940
Chr4	15219000	15220000	Chr4	15242000	15243000	24000	4.38021	16	1.24469e-05	0.00634825	15219000	15221000	15242000	15244000	31	0.5	AT4G31354,AT4G31355	AT4G31408
Chr4	16839000	16840000	Chr4	16862000	16863000	24000	4.38021	16	0.000101543	0.0385814	16839000	16840000	16862000	16863000	16	1	AT4G35440,AT4G35450	AT4G35510,AT4G35519
Chr4	5680000	5681000	Chr4	5703000	5704000	24000	4.38021	11	2.30231e-05	0.0108309	5680000	5681000	5703000	5704000	11	1	AT4G08876,AT4G08878	AT4G08895,AT4G08900
Chr4	2113000	2114000	Chr4	2136000	2137000	24000	4.38021	11	9.46868e-05	0.0364268	2113000	2114000	2136000	2137000	11	1	AT4G04320	AT4G04370
Chr4	4806000	4807000	Chr4	4829000	4830000	24000	4.38021	10	0.000129892	0.0472924	4806000	4807000	4829000	4830000	10	1	AT4G07965	AT4G07990
Chr4	9748000	9749000	Chr4	9771000	9772000	24000	4.38021	9	7.39098e-05	0.0294917	9748000	9749000	9771000	9772000	9	1	AT4G17483	AT4G17520
Chr4	17649000	17650000	Chr4	17672000	17673000	24000	4.38021	21	1.68496e-09	1.9309e-06	17649000	17650000	17672000	17673000	21	1	AT4G37553	AT4G37610
Chr4	6520000	6521000	Chr4	6543000	6544000	24000	4.38021	20	2.68626e-10	3.51863e-07	6520000	6521000	6543000	6544000	20	1	AT4G10530,AT4G10540,AT4G10550,AT4G10560	AT4G10590,AT4G10595,AT4G10596,AT4G10600
Chr4	5380000	5381000	Chr4	5403000	5404000	24000	4.38021	23	1.00077e-09	1.19273e-06	5380000	5381000	5403000	5404000	23	1	AT4G08460	AT4G08500
Chr4	15544000	15545000	Chr4	15567000	15568000	24000	4.38021	14	2.39485e-06	0.00147925	15544000	15545000	15567000	15568000	14	1	AT4G32190	NA
Chr4	14514000	14515000	Chr4	14537000	14538000	24000	4.38021	17	1.92169e-05	0.00925306	14514000	14515000	14537000	14538000	17	1	AT4G29580,AT4G29590	AT4G29650,AT4G29654,AT4G29658,AT4G29660,AT4G29670,AT4G29680
Chr4	730000	731000	Chr4	753000	754000	24000	4.38021	23	4.41171e-09	4.7399e-06	730000	731000	753000	754000	23	1	AT4G01690	AT4G01740
Chr4	2472000	2473000	Chr4	2495000	2496000	24000	4.38021	13	1.78931e-05	0.00869588	2472000	2473000	2495000	2496000	13	1	AT4G04885	AT4G04910
Chr5	19351000	19352000	Chr5	19374000	19375000	24000	4.38021	26	5.5109e-11	8.01819e-08	19351000	19353000	19373000	19376000	99	0.833333	AT5G47790	AT5G47830
Chr5	26089000	26090000	Chr5	26112000	26113000	24000	4.38021	23	2.26942e-10	3.00299e-07	26089000	26091000	26112000	26113000	38	1	AT5G65290	AT5G65340
Chr5	18202000	18203000	Chr5	18225000	18226000	24000	4.38021	12	9.96216e-05	0.0379851	18202000	18203000	18225000	18226000	12	1	AT5G45090	AT5G45105
Chr5	8193000	8194000	Chr5	8216000	8217000	24000	4.38021	11	9.8063e-05	0.0374846	8193000	8194000	8216000	8217000	11	1	AT5G24180	AT5G24205,AT5G24206
Chr5	12565000	12566000	Chr5	12588000	12589000	24000	4.38021	11	1.81236e-05	0.00878813	12565000	12566000	12588000	12589000	11	1	AT5G33300	AT5G33320
Chr5	16855000	16856000	Chr5	16878000	16879000	24000	4.38021	16	0.000102411	0.0388526	16855000	16856000	16878000	16879000	16	1	AT5G42190	AT5G42223,AT5G42230
Chr5	17759000	17760000	Chr5	17782000	17783000	24000	4.38021	14	7.36725e-06	0.00400368	17759000	17760000	17782000	17783000	14	1	NA	NA
Chr5	23374000	23375000	Chr5	23397000	23398000	24000	4.38021	16	9.25488e-06	0.00490057	23374000	23375000	23397000	23398000	16	1	AT5G57690,AT5G57700	AT5G57740,AT5G57747,AT5G57750,AT5G57760,AT5G57770
Chr5	6375000	6376000	Chr5	6398000	6399000	24000	4.38021	13	1.88113e-05	0.00907687	6375000	6376000	6398000	6399000	13	1	AT5G19070	NA
Chr5	11709000	11710000	Chr5	11732000	11733000	24000	4.38021	6	8.23674e-06	0.00442351	11709000	11710000	11732000	11733000	6	1	NA	NA
Chr5	4545000	4546000	Chr5	4568000	4569000	24000	4.38021	11	0.000111628	0.0416998	4545000	4546000	4568000	4569000	11	1	AT5G14080	AT5G14150,AT5G14160,AT5G14170
Chr5	6530000	6531000	Chr5	6553000	6554000	24000	4.38021	14	8.50704e-05	0.0332472	6530000	6531000	6553000	6554000	14	1	AT5G19380	AT5G19420,AT5G19430
Chr5	1656000	1657000	Chr5	1679000	1680000	24000	4.38021	22	4.83246e-12	8.18251e-09	1656000	1657000	1679000	1680000	22	1	AT5G05570	AT5G05610,AT5G05620
Chr5	22862000	22863000	Chr5	22885000	22886000	24000	4.38021	15	1.07101e-05	0.00557135	22862000	22863000	22885000	22886000	15	1	AT5G56452,AT5G56460	AT5G56510,AT5G56520
Chr5	24016000	24017000	Chr5	24039000	24040000	24000	4.38021	14	4.17018e-05	0.0180608	24016000	24017000	24039000	24040000	14	1	AT5G59613	AT5G59660,AT5G59662,AT5G59670
Chr5	7627000	7628000	Chr5	7650000	7651000	24000	4.38021	13	2.96562e-05	0.0134635	7627000	7628000	7650000	7651000	13	1	AT5G22800,AT5G22810,AT5G22820,AT5G22830	AT5G22870,AT5G22875
Chr5	25647000	25648000	Chr5	25670000	25671000	24000	4.38021	15	9.92462e-05	0.0378606	25647000	25648000	25670000	25671000	15	1	NA	AT5G64150,AT5G64160
Chr5	13602000	13603000	Chr5	13625000	13626000	24000	4.38021	13	3.58619e-06	0.00211964	13602000	13603000	13625000	13626000	13	1	AT5G35400	NA
Chr5	341000	342000	Chr5	364000	365000	24000	4.38021	13	0.000115962	0.0429991	341000	342000	364000	365000	13	1	AT5G01881,AT5G01890	AT5G01940,AT5G01950
Chr5	16047000	16048000	Chr5	16070000	16071000	24000	4.38021	16	1.22214e-06	0.000810247	16047000	16048000	16070000	16071000	16	1	AT5G40100,AT5G40120	AT5G40200
Chr5	9961000	9962000	Chr5	9984000	9985000	24000	4.38021	13	3.63752e-05	0.0160745	9961000	9962000	9984000	9985000	13	1	AT5G27930	AT5G27950
Chr5	14567000	14568000	Chr5	14590000	14591000	24000	4.38021	11	9.00902e-06	0.00478309	14567000	14568000	14590000	14591000	11	1	AT5G36930	AT5G36940
Chr5	25066000	25067000	Chr5	25089000	25090000	24000	4.38021	14	0.000122814	0.0450945	25066000	25067000	25089000	25090000	14	1	AT5G62420,AT5G62430	AT5G62480,AT5G62490
Chr5	1073000	1074000	Chr5	1096000	1097000	24000	4.38021	12	6.35558e-05	0.0259039	1073000	1074000	1096000	1097000	12	1	AT5G03960,AT5G03970	AT5G04045,AT5G04047,AT5G04050
Chr5	2064000	2065000	Chr5	2087000	2088000	24000	4.38021	16	8.6579e-05	0.0337418	2064000	2065000	2087000	2088000	16	1	AT5G06700	AT5G06740,AT5G06750
Chr1	20652000	20653000	Chr1	20674000	20675000	23000	4.36173	23	2.48645e-09	2.77375e-06	20651000	20654000	20674000	20675000	55	1	AT1G55340	AT1G55365,AT1G55370,AT1G55380,AT1G55390
Chr1	21667000	21668000	Chr1	21689000	21690000	23000	4.36173	16	2.11803e-07	0.000166348	21667000	21668000	21688000	21691000	49	1	AT1G58350	AT1G58380
Chr1	21440000	21441000	Chr1	21462000	21463000	23000	4.36173	22	2.35118e-09	2.63457e-06	21440000	21442000	21462000	21463000	38	1	AT1G57980	AT1G58025
Chr1	19568000	19569000	Chr1	19590000	19591000	23000	4.36173	25	9.50338e-09	9.62639e-06	19568000	19569000	19589000	19591000	43	1	AT1G52520,AT1G52530	AT1G52590,AT1G52600
Chr1	22088000	22089000	Chr1	22110000	22111000	23000	4.36173	16	1.19523e-05	0.00613219	22088000	22089000	22110000	22112000	30	1	NA	AT1G60025
Chr1	13124000	13125000	Chr1	13146000	13147000	23000	4.36173	18	3.49475e-06	0.00207126	13124000	13125000	13146000	13147000	18	1	AT1G35580	NA
Chr1	3756000	3757000	Chr1	3778000	3779000	23000	4.36173	14	5.49741e-05	0.0228983	3756000	3757000	3778000	3779000	14	1	AT1G11200,AT1G11210,AT1G11220	AT1G11260
Chr1	12466000	12467000	Chr1	12488000	12489000	23000	4.36173	14	5.95054e-06	0.00331881	12466000	12467000	12488000	12489000	14	1	AT1G34220,AT1G34245	AT1G34260
Chr1	24818000	24819000	Chr1	24840000	24841000	23000	4.36173	12	0.000121338	0.0446624	24818000	24819000	24840000	24841000	12	1	AT1G66520,AT1G66530	AT1G66580,AT1G66590
Chr1	168000	169000	Chr1	190000	191000	23000	4.36173	19	2.20345e-05	0.010427	168000	169000	190000	191000	19	1	AT1G01448,AT1G01450,AT1G01453,AT1G01460	AT1G01510,AT1G01520
Chr1	6439000	6440000	Chr1	6461000	6462000	23000	4.36173	14	3.1391e-05	0.014142	6439000	6440000	6461000	6462000	14	1	AT1G18700	AT1G18730,AT1G18735
Chr1	7022000	7023000	Chr1	7044000	7045000	23000	4.36173	13	0.000113987	0.0424101	7022000	7023000	7044000	7045000	13	1	AT1G20270,AT1G20280	AT1G20350,AT1G20360
Chr1	20306000	20307000	Chr1	20328000	20329000	23000	4.36173	15	2.55595e-05	0.0118484	20306000	20307000	20328000	20329000	15	1	AT1G54380,AT1G54385,AT1G54390	AT1G54440,AT1G54445,AT1G54450
Chr1	5688000	5689000	Chr1	5710000	5711000	23000	4.36173	13	6.36423e-05	0.0259378	5688000	5689000	5710000	5711000	13	1	AT1G16650	AT1G16700
Chr1	6437000	6438000	Chr1	6459000	6460000	23000	4.36173	15	0.000111741	0.0417347	6437000	6438000	6459000	6460000	15	1	AT1G18690,AT1G18700	AT1G18720
Chr1	10477000	10478000	Chr1	10499000	10500000	23000	4.36173	19	3.96146e-07	0.000293854	10477000	10478000	10499000	10500000	19	1	AT1G29910,AT1G29920,AT1G29930,AT1G29940	AT1G29965,AT1G29970
Chr1	21052000	21053000	Chr1	21074000	21075000	23000	4.36173	12	7.16717e-05	0.0287195	21052000	21053000	21074000	21075000	12	1	NA	AT1G56270,AT1G56280
Chr1	27039000	27040000	Chr1	27061000	27062000	23000	4.36173	13	0.000127737	0.0466424	27039000	27040000	27061000	27062000	13	1	NA	AT1G71890,AT1G71900
Chr1	11619000	11620000	Chr1	11641000	11642000	23000	4.36173	18	1.46589e-06	0.000952516	11619000	11620000	11641000	11642000	18	1	NA	AT1G32250,AT1G32260,AT1G32270,AT1G32280
Chr1	14285000	14286000	Chr1	14307000	14308000	23000	4.36173	17	7.95003e-07	0.000551864	14285000	14286000	14307000	14308000	17	1	NA	NA
Chr2	1800000	1801000	Chr2	1822000	1823000	23000	4.36173	27	1.63868e-12	2.93714e-09	1800000	1802000	1822000	1825000	92	0.833333	AT2G05070	NA
Chr2	8207000	8208000	Chr2	8229000	8230000	23000	4.36173	17	7.99679e-08	6.82448e-05	8207000	8209000	8229000	8232000	56	0.666667	AT2G18940,AT2G18950	AT2G18969,AT2G18970
Chr2	7218000	7219000	Chr2	7240000	7241000	23000	4.36173	54	1.50557e-33	2.83446e-29	7218000	7219000	7238000	7241000	129	1	AT2G16650,AT2G16660	NA
Chr2	9427000	9428000	Chr2	9449000	9450000	23000	4.36173	15	2.05626e-05	0.00982074	9427000	9429000	9449000	9450000	27	1	AT2G22170,AT2G22180	AT2G22220,AT2G22230
Chr2	13559000	13560000	Chr2	13581000	13582000	23000	4.36173	13	3.22311e-05	0.0144693	13559000	13560000	13581000	13582000	13	1	AT2G31890	AT2G31930,AT2G31940,AT2G31945,AT2G31953
Chr2	11118000	11119000	Chr2	11140000	11141000	23000	4.36173	13	4.98672e-05	0.0210558	11118000	11119000	11140000	11141000	13	1	AT2G26100,AT2G26110	AT2G26160,AT2G26170,AT2G26180
Chr2	9516000	9517000	Chr2	9538000	9539000	23000	4.36173	19	2.81825e-08	2.61772e-05	9516000	9517000	9538000	9539000	19	1	AT2G22426	AT2G22470,AT2G22475
Chr2	12671000	12672000	Chr2	12693000	12694000	23000	4.36173	18	3.53579e-06	0.00209201	12671000	12672000	12693000	12694000	18	1	AT2G29630,AT2G29640	AT2G29679,AT2G29680,AT2G29690
Chr2	1824000	1825000	Chr2	1846000	1847000	23000	4.36173	11	1.0607e-05	0.00552623	1824000	1825000	1846000	1847000	11	1	AT2G05100	AT2G05120
Chr2	286000	287000	Chr2	308000	309000	23000	4.36173	33	2.27678e-14	5.16116e-11	286000	287000	308000	309000	33	1	AT2G01650	AT2G01680,AT2G01690
Chr2	10631000	10632000	Chr2	10653000	10654000	23000	4.36173	13	1.07796e-05	0.00560376	10631000	10632000	10653000	10654000	13	1	AT2G25000,AT2G25010	AT2G25050
Chr2	1263000	1264000	Chr2	1285000	1286000	23000	4.36173	17	8.37372e-07	0.000578486	1263000	1264000	1285000	1286000	17	1	NA	AT2G04030,AT2G04032
Chr2	13327000	13328000	Chr2	13349000	13350000	23000	4.36173	14	8.74249e-06	0.00465812	13327000	13328000	13349000	13350000	14	1	AT2G31260	AT2G31300,AT2G31305,AT2G31310
Chr2	17238000	17239000	Chr2	17260000	17261000	23000	4.36173	14	7.59045e-05	0.0301622	17238000	17239000	17260000	17261000	14	1	AT2G41370	AT2G41400
Chr2	7644000	7645000	Chr2	7666000	7667000	23000	4.36173	15	0.000115333	0.0428111	7644000	7645000	7666000	7667000	15	1	AT2G17570	AT2G17620,AT2G17630
Chr2	19090000	19091000	Chr2	19112000	19113000	23000	4.36173	15	8.61441e-05	0.033606	19090000	19091000	19112000	19113000	15	1	AT2G46505,AT2G46510	AT2G46535,AT2G46540,AT2G46550
Chr2	15556000	15557000	Chr2	15578000	15579000	23000	4.36173	21	3.57498e-05	0.0158341	15556000	15557000	15578000	15579000	21	1	AT2G37035	AT2G37050,AT2G37060,AT2G37070,AT2G37080
Chr2	527000	528000	Chr2	549000	550000	23000	4.36173	11	2.3866e-05	0.0111666	527000	528000	549000	550000	11	1	AT2G02090	AT2G02148,AT2G02150
Chr2	18639000	18640000	Chr2	18661000	18662000	23000	4.36173	16	5.28562e-05	0.0221419	18639000	18640000	18661000	18662000	16	1	AT2G45200	AT2G45240,AT2G45245,AT2G45250
Chr2	12675000	12676000	Chr2	12697000	12698000	23000	4.36173	13	8.72303e-05	0.0339565	12675000	12676000	12697000	12698000	13	1	AT2G29650,AT2G29654	AT2G29700
Chr2	1503000	1504000	Chr2	1525000	1526000	23000	4.36173	14	5.95078e-05	0.0245136	1503000	1504000	1525000	1526000	14	1	AT2G04305	AT2G04370,AT2G04378,AT2G04380
Chr2	12016000	12017000	Chr2	12038000	12039000	23000	4.36173	17	1.44671e-05	0.0072255	12016000	12017000	12038000	12039000	17	1	AT2G28190	AT2G28220,AT2G28230
Chr2	11316000	11317000	Chr2	11338000	11339000	23000	4.36173	12	6.05047e-05	0.0248584	11316000	11317000	11338000	11339000	12	1	AT2G26590,AT2G26600	AT2G26660
Chr3	11051000	11052000	Chr3	11073000	11074000	23000	4.36173	27	1.28711e-15	3.4063e-12	11051000	11053000	11072000	11078000	215	0.833333	AT3G29070,AT3G29075	AT3G29080,AT3G29090
Chr3	22222000	22223000	Chr3	22244000	22245000	23000	4.36173	19	3.41847e-08	3.12667e-05	22222000	22224000	22243000	22245000	54	0.75	AT3G60150	AT3G60180,AT3G60190
Chr3	4113000	4114000	Chr3	4135000	4136000	23000	4.36173	20	7.14263e-09	7.40091e-06	4112000	4115000	4135000	4136000	53	1	AT3G12915	AT3G12950,AT3G12955
Chr3	18721000	18722000	Chr3	18743000	18744000	23000	4.36173	27	8.88471e-09	9.04922e-06	18721000	18723000	18743000	18744000	43	1	NA	AT3G50500,AT3G50505,AT3G50510
Chr3	9722000	9723000	Chr3	9744000	9745000	23000	4.36173	20	3.67335e-09	4.00303e-06	9722000	9723000	9743000	9745000	36	1	AT3G26520	AT3G26540
Chr3	16260000	16261000	Chr3	16282000	16283000	23000	4.36173	16	1.32951e-05	0.00671923	16259000	16261000	16282000	16283000	28	1	AT3G44710,AT3G44713	NA
Chr3	11168000	11169000	Chr3	11190000	11191000	23000	4.36173	21	7.5877e-10	9.23561e-07	11168000	11169000	11190000	11192000	36	1	NA	AT3G29230
Chr3	14186000	14187000	Chr3	14208000	14209000	23000	4.36173	9	1.99676e-07	0.000157699	14186000	14187000	14207000	14209000	16	1	NA	NA
Chr3	18049000	18050000	Chr3	18071000	18072000	23000	4.36173	27	5.17222e-12	8.71794e-09	18049000	18050000	18071000	18072000	27	1	AT3G48720,AT3G48730	AT3G48745,AT3G48750
Chr3	16928000	16929000	Chr3	16950000	16951000	23000	4.36173	19	2.2035e-08	2.08615e-05	16928000	16929000	16950000	16951000	19	1	AT3G46100	AT3G46140,AT3G46150,AT3G46160,AT3G46170
Chr3	18815000	18816000	Chr3	18837000	18838000	23000	4.36173	17	7.74256e-06	0.00418708	18815000	18816000	18837000	18838000	17	1	AT3G50660	AT3G50690,AT3G50695,AT3G50700,AT3G50710,AT3G50720
Chr3	17527000	17528000	Chr3	17549000	17550000	23000	4.36173	25	1.08071e-08	1.08396e-05	17527000	17528000	17549000	17550000	25	1	AT3G47560,AT3G47570	AT3G47610
Chr3	5570000	5571000	Chr3	5592000	5593000	23000	4.36173	15	1.92148e-05	0.0092526	5570000	5571000	5592000	5593000	15	1	NA	AT3G16460
Chr3	10960000	10961000	Chr3	10982000	10983000	23000	4.36173	19	2.13056e-08	2.02393e-05	10960000	10961000	10982000	10983000	19	1	AT3G28925,AT3G28930	AT3G28956,AT3G28958,AT3G28960
Chr3	20479000	20480000	Chr3	20501000	20502000	23000	4.36173	17	1.88553e-05	0.00909735	20479000	20480000	20501000	20502000	17	1	AT3G55250	AT3G55280
Chr3	11166000	11167000	Chr3	11188000	11189000	23000	4.36173	11	9.43991e-06	0.00499039	11166000	11167000	11188000	11189000	11	1	AT3G29200	AT3G29230
Chr3	17126000	17127000	Chr3	17148000	17149000	23000	4.36173	12	0.000136364	0.0493129	17126000	17127000	17148000	17149000	12	1	AT3G46510,AT3G46520	AT3G46570,AT3G46580,AT3G46585
Chr3	10400000	10401000	Chr3	10422000	10423000	23000	4.36173	11	0.00011106	0.041544	10400000	10401000	10422000	10423000	11	1	NA	AT3G28020
Chr3	15971000	15972000	Chr3	15993000	15994000	23000	4.36173	14	3.84777e-05	0.0168674	15971000	15972000	15993000	15994000	14	1	AT3G44280	AT3G44320
Chr3	18052000	18053000	Chr3	18074000	18075000	23000	4.36173	29	3.03435e-12	5.24641e-09	18052000	18053000	18074000	18075000	29	1	AT3G48740	AT3G48750
Chr3	8837000	8838000	Chr3	8859000	8860000	23000	4.36173	12	3.15316e-05	0.0141938	8837000	8838000	8859000	8860000	12	1	AT3G24330,AT3G24332,AT3G24340,AT3G24350	AT3G24420
Chr3	9682000	9683000	Chr3	9704000	9705000	23000	4.36173	12	9.81306e-05	0.0374994	9682000	9683000	9704000	9705000	12	1	AT3G26450	AT3G26490
Chr3	21758000	21759000	Chr3	21780000	21781000	23000	4.36173	14	8.19739e-05	0.03218	21758000	21759000	21780000	21781000	14	1	AT3G58840,AT3G58850	AT3G58920,AT3G58930,AT3G58940
Chr3	15950000	15951000	Chr3	15972000	15973000	23000	4.36173	17	2.35054e-05	0.0110184	15950000	15951000	15972000	15973000	17	1	AT3G44240,AT3G44250	AT3G44290
Chr3	16068000	16069000	Chr3	16090000	16091000	23000	4.36173	13	5.67056e-06	0.00318206	16068000	16069000	16090000	16091000	13	1	AT3G44428,AT3G44430	AT3G44480
Chr4	8898000	8899000	Chr4	8920000	8921000	23000	4.36173	39	4.43221e-19	1.76006e-15	8897000	8899000	8915000	8922000	163	0.571429	AT4G15570	AT4G15630,AT4G15640
Chr4	10508000	10509000	Chr4	10530000	10531000	23000	4.36173	23	9.64786e-10	1.15267e-06	10507000	10509000	10530000	10532000	52	0.75	AT4G19220	AT4G19240,AT4G19250,AT4G19260,AT4G19270
Chr4	13002000	13003000	Chr4	13024000	13025000	23000	4.36173	18	3.15147e-07	0.000238666	13002000	13004000	13024000	13025000	32	1	AT4G25420,AT4G25430,AT4G25433	AT4G25490,AT4G25500
Chr4	5230000	5231000	Chr4	5252000	5253000	23000	4.36173	12	9.75928e-07	0.000663535	5230000	5231000	5252000	5253000	12	1	AT4G08280	AT4G08300,AT4G08310,AT4G08320
Chr4	6384000	6385000	Chr4	6406000	6407000	23000	4.36173	14	4.18805e-05	0.0181251	6384000	6385000	6406000	6407000	14	1	AT4G10290,AT4G10300	AT4G10330
Chr4	1162000	1163000	Chr4	1184000	1185000	23000	4.36173	13	1.39043e-05	0.00697983	1162000	1163000	1184000	1185000	13	1	AT4G02660	AT4G02680,AT4G02690,AT4G02700
Chr4	7563000	7564000	Chr4	7585000	7586000	23000	4.36173	16	1.42536e-06	0.000928977	7563000	7564000	7585000	7586000	16	1	AT4G12917	AT4G12950,AT4G12960,AT4G12970
Chr4	6322000	6323000	Chr4	6344000	6345000	23000	4.36173	13	0.000104941	0.0396439	6322000	6323000	6344000	6345000	13	1	AT4G10140	AT4G10160,AT4G10170
Chr4	14841000	14842000	Chr4	14863000	14864000	23000	4.36173	14	8.10458e-05	0.0318679	14841000	14842000	14863000	14864000	14	1	AT4G30330,AT4G30340	AT4G30390
Chr4	9893000	9894000	Chr4	9915000	9916000	23000	4.36173	16	1.02022e-05	0.0053418	9893000	9894000	9915000	9916000	16	1	NA	AT4G17830
Chr4	16514000	16515000	Chr4	16536000	16537000	23000	4.36173	12	5.82306e-05	0.0240576	16514000	16515000	16536000	16537000	12	1	AT4G34570,AT4G34580	AT4G34620,AT4G34630
Chr4	9724000	9725000	Chr4	9746000	9747000	23000	4.36173	19	3.72227e-08	3.38107e-05	9724000	9725000	9746000	9747000	19	1	AT4G17420,AT4G17430	AT4G17480
Chr4	6734000	6735000	Chr4	6756000	6757000	23000	4.36173	18	3.02212e-07	0.000229845	6734000	6735000	6756000	6757000	18	1	AT4G11010,AT4G11020,AT4G11030	AT4G11060
Chr4	6903000	6904000	Chr4	6925000	6926000	23000	4.36173	13	2.16861e-05	0.0102822	6903000	6904000	6925000	6926000	13	1	AT4G11350	AT4G11380,AT4G11385
Chr4	72000	73000	Chr4	94000	95000	23000	4.36173	14	6.50199e-05	0.0263982	72000	73000	94000	95000	14	1	AT4G00170,AT4G00180	AT4G00220,AT4G00230
Chr4	2587000	2588000	Chr4	2609000	2610000	23000	4.36173	16	9.32888e-07	0.000638066	2587000	2588000	2609000	2610000	16	1	AT4G05048,AT4G05050	AT4G05080,AT4G05090
Chr4	3965000	3966000	Chr4	3987000	3988000	23000	4.36173	3	9.14677e-05	0.0353687	3965000	3966000	3987000	3988000	3	1	NA	NA
Chr4	11412000	11413000	Chr4	11434000	11435000	23000	4.36173	14	0.000108388	0.0407341	11412000	11413000	11434000	11435000	14	1	AT4G21430	AT4G21480
Chr4	713000	714000	Chr4	735000	736000	23000	4.36173	16	4.16533e-06	0.00242236	713000	714000	735000	736000	16	1	AT4G01671	AT4G01710
Chr4	2353000	2354000	Chr4	2375000	2376000	23000	4.36173	12	7.30513e-06	0.0039723	2353000	2354000	2375000	2376000	12	1	AT4G04650	AT4G04690
Chr5	8756000	8757000	Chr5	8778000	8779000	23000	4.36173	53	5.36216e-37	1.59132e-32	8754000	8758000	8775000	8782000	261	0.392857	AT5G25265	AT5G25290
Chr5	21609000	21610000	Chr5	21631000	21632000	23000	4.36173	30	1.18137e-19	4.97324e-16	21608000	21610000	21631000	21635000	136	0.875	AT5G53280	NA
Chr5	6378000	6379000	Chr5	6400000	6401000	23000	4.36173	19	1.81162e-10	2.43113e-07	6378000	6380000	6398000	6402000	70	0.625	AT5G19080	NA
Chr5	10615000	10616000	Chr5	10637000	10638000	23000	4.36173	20	2.15292e-09	2.42957e-06	10614000	10616000	10636000	10638000	55	1	NA	AT5G28630
Chr5	9742000	9743000	Chr5	9764000	9765000	23000	4.36173	14	1.89235e-06	0.00119633	9742000	9744000	9764000	9765000	26	1	AT5G27600	AT5G27610
Chr5	10047000	10048000	Chr5	10069000	10070000	23000	4.36173	25	3.68259e-18	1.32317e-14	10047000	10048000	10069000	10071000	53	1	AT5G28052	AT5G28060
Chr5	14572000	14573000	Chr5	14594000	14595000	23000	4.36173	18	1.26487e-10	1.74099e-07	14572000	14573000	14594000	14596000	27	1	AT5G36930	AT5G36940,AT5G36950
Chr5	25873000	25874000	Chr5	25895000	25896000	23000	4.36173	14	8.52799e-06	0.00456071	25873000	25874000	25895000	25897000	27	1	AT5G64720,AT5G64730	AT5G64760,AT5G64770
Chr5	17431000	17432000	Chr5	17453000	17454000	23000	4.36173	27	2.67911e-12	4.66123e-09	17431000	17432000	17453000	17455000	43	1	AT5G43403,AT5G43410	AT5G43420,AT5G43430
Chr5	7021000	7022000	Chr5	7043000	7044000	23000	4.36173	17	9.95618e-08	8.33381e-05	7021000	7023000	7043000	7045000	33	0.5	AT5G20730	AT5G20810
Chr5	19676000	19677000	Chr5	19698000	19699000	23000	4.36173	13	4.57165e-05	0.0195448	19676000	19678000	19698000	19699000	24	1	AT5G48543,AT5G48545,AT5G48550,AT5G48560	AT5G48580,AT5G48590
Chr5	14863000	14864000	Chr5	14885000	14886000	23000	4.36173	20	7.33899e-10	8.95953e-07	14863000	14865000	14885000	14887000	33	0.5	AT5G37450,AT5G37460,AT5G37470	AT5G37478,AT5G37480,AT5G37485
Chr5	14252000	14253000	Chr5	14274000	14275000	23000	4.36173	11	1.47835e-05	0.00736114	14252000	14253000	14274000	14275000	11	1	AT5G36210	AT5G36230
Chr5	10070000	10071000	Chr5	10092000	10093000	23000	4.36173	15	4.04108e-06	0.00235803	10070000	10071000	10092000	10093000	15	1	AT5G28060	AT5G28070,AT5G28080,AT5G28090
Chr5	2602000	2603000	Chr5	2624000	2625000	23000	4.36173	17	6.05261e-07	0.000431556	2602000	2603000	2624000	2625000	17	1	AT5G08120	NA
Chr5	13894000	13895000	Chr5	13916000	13917000	23000	4.36173	17	4.22976e-08	3.80031e-05	13894000	13895000	13916000	13917000	17	1	AT5G35730	AT5G35750
Chr5	15619000	15620000	Chr5	15641000	15642000	23000	4.36173	16	5.38891e-05	0.0225224	15619000	15620000	15641000	15642000	16	1	AT5G39020,AT5G39024,AT5G39030	AT5G39080
Chr5	8726000	8727000	Chr5	8748000	8749000	23000	4.36173	13	8.11182e-05	0.0318885	8726000	8727000	8748000	8749000	13	1	NA	AT5G25240
Chr5	25814000	25815000	Chr5	25836000	25837000	23000	4.36173	16	1.0464e-05	0.00546231	25814000	25815000	25836000	25837000	16	1	NA	AT5G64630,AT5G64640
Chr5	20801000	20802000	Chr5	20823000	20824000	23000	4.36173	16	1.88224e-06	0.00119081	20801000	20802000	20823000	20824000	16	1	AT5G51190	AT5G51220,AT5G51230
Chr5	24903000	24904000	Chr5	24925000	24926000	23000	4.36173	18	1.93526e-05	0.00930916	24903000	24904000	24925000	24926000	18	1	AT5G61990	AT5G62050
Chr5	15187000	15188000	Chr5	15209000	15210000	23000	4.36173	14	2.12771e-05	0.0101178	15187000	15188000	15209000	15210000	14	1	AT5G38050	AT5G38110,AT5G38120
Chr5	16004000	16005000	Chr5	16026000	16027000	23000	4.36173	16	8.14366e-05	0.0319959	16004000	16005000	16026000	16027000	16	1	AT5G39970,AT5G39980,AT5G39990	AT5G40030,AT5G40040
Chr5	20080000	20081000	Chr5	20102000	20103000	23000	4.36173	15	8.80753e-05	0.0342412	20080000	20081000	20102000	20103000	15	1	AT5G49500,AT5G49510	AT5G49530
Chr5	437000	438000	Chr5	459000	460000	23000	4.36173	20	2.41978e-06	0.00149287	437000	438000	459000	460000	20	1	AT5G02200	AT5G02250
Chr5	8977000	8978000	Chr5	8999000	9000000	23000	4.36173	16	7.44797e-06	0.00404178	8977000	8978000	8999000	9000000	16	1	AT5G25780,AT5G25790	AT5G25820
Chr5	19203000	19204000	Chr5	19225000	19226000	23000	4.36173	14	0.00012692	0.0463852	19203000	19204000	19225000	19226000	14	1	AT5G47320,AT5G47330	AT5G47380
Chr5	7260000	7261000	Chr5	7282000	7283000	23000	4.36173	13	0.000100122	0.0381235	7260000	7261000	7282000	7283000	13	1	NA	AT5G22010
Chr5	26317000	26318000	Chr5	26339000	26340000	23000	4.36173	13	0.000104367	0.0394674	26317000	26318000	26339000	26340000	13	1	AT5G65780	AT5G65810,AT5G65820
Chr5	22525000	22526000	Chr5	22547000	22548000	23000	4.36173	15	8.83557e-06	0.0047016	22525000	22526000	22547000	22548000	15	1	AT5G55590,AT5G55600,AT5G55610	AT5G55680,AT5G55690
Chr5	15022000	15023000	Chr5	15044000	15045000	23000	4.36173	16	4.39829e-05	0.0189098	15022000	15023000	15044000	15045000	16	1	NA	AT5G37800,AT5G37810
Chr5	7804000	7805000	Chr5	7826000	7827000	23000	4.36173	15	0.000100062	0.0381043	7804000	7805000	7826000	7827000	15	1	AT5G23190	AT5G23230,AT5G23240
Chr5	7549000	7550000	Chr5	7571000	7572000	23000	4.36173	19	1.1248e-08	1.12514e-05	7549000	7550000	7571000	7572000	19	1	AT5G22700,AT5G22720	AT5G22750,AT5G22760
Chr5	22126000	22127000	Chr5	22148000	22149000	23000	4.36173	16	3.31171e-06	0.00197558	22126000	22127000	22148000	22149000	16	1	AT5G54500,AT5G54510	AT5G54520
Chr5	25541000	25542000	Chr5	25563000	25564000	23000	4.36173	16	9.62989e-05	0.0369392	25541000	25542000	25563000	25564000	16	1	AT5G63810,AT5G63820,AT5G63830,AT5G63840	AT5G63870,AT5G63880
Chr5	23978000	23979000	Chr5	24000000	24001000	23000	4.36173	14	0.000129919	0.0472991	23978000	23979000	24000000	24001000	14	1	AT5G59460,AT5G59470	AT5G59560
Chr5	14629000	14630000	Chr5	14651000	14652000	23000	4.36173	14	4.85574e-06	0.00277712	14629000	14630000	14651000	14652000	14	1	AT5G37020	AT5G37070
Chr5	2533000	2534000	Chr5	2555000	2556000	23000	4.36173	29	4.11437e-14	9.01907e-11	2533000	2534000	2555000	2556000	29	1	AT5G07930,AT5G07940	AT5G07980
Chr5	6472000	6473000	Chr5	6494000	6495000	23000	4.36173	15	3.61169e-05	0.0159757	6472000	6473000	6494000	6495000	15	1	AT5G19250,AT5G19257,AT5G19260	AT5G19290
Chr1	6003000	6004000	Chr1	6024000	6025000	22000	4.34242	51	1.10328e-29	1.35306e-25	6002000	6010000	6022000	6025000	352	0.5	AT1G17460,AT1G17470	AT1G17510,AT1G17520
Chr1	17253000	17254000	Chr1	17274000	17275000	22000	4.34242	16	3.21962e-05	0.0144553	17253000	17255000	17268000	17275000	195	0.642857	AT1G46554	AT1G46912,AT1G46984
Chr1	10225000	10226000	Chr1	10246000	10247000	22000	4.34242	44	1.24867e-16	3.75294e-13	10224000	10227000	10244000	10248000	208	0.666667	AT1G29250,AT1G29260,AT1G29265,AT1G29270	NA
Chr1	10942000	10943000	Chr1	10963000	10964000	22000	4.34242	24	7.55005e-08	6.46665e-05	10942000	10944000	10959000	10964000	150	0.8	AT1G30810,AT1G30814	AT1G30825,AT1G30830
Chr1	17031000	17032000	Chr1	17052000	17053000	22000	4.34242	18	7.91959e-10	9.61549e-07	17031000	17035000	17052000	17053000	65	1	AT1G45050	AT1G45100,AT1G45110
Chr1	8029000	8030000	Chr1	8050000	8051000	22000	4.34242	25	3.65935e-13	7.08838e-10	8029000	8030000	8048000	8051000	71	1	AT1G22700,AT1G22710	AT1G22740,AT1G22750
Chr1	9675000	9676000	Chr1	9696000	9697000	22000	4.34242	21	3.55726e-08	3.24445e-05	9675000	9677000	9695000	9697000	48	0.75	AT1G27770	AT1G27840
Chr1	4398000	4399000	Chr1	4419000	4420000	22000	4.34242	17	9.39465e-07	0.000642056	4397000	4399000	4418000	4420000	53	0.75	AT1G12920,AT1G12930	AT1G12940,AT1G12950
Chr1	28857000	28858000	Chr1	28878000	28879000	22000	4.34242	15	2.80085e-06	0.00169885	28857000	28859000	28878000	28879000	28	1	AT1G76870	NA
Chr1	4567000	4568000	Chr1	4588000	4589000	22000	4.34242	14	4.92578e-05	0.020849	4567000	4568000	4587000	4589000	25	1	AT1G13320,AT1G13330	AT1G13370,AT1G13380,AT1G13390,AT1G13400
Chr1	17397000	17398000	Chr1	17418000	17419000	22000	4.34242	23	1.78962e-10	2.40327e-07	17397000	17398000	17417000	17419000	39	1	AT1G47420,AT1G47450	AT1G47470,AT1G47480
Chr1	8198000	8199000	Chr1	8219000	8220000	22000	4.34242	18	8.36242e-06	0.00448543	8198000	8199000	8219000	8221000	33	1	AT1G23110,AT1G23120,AT1G23130	AT1G23180,AT1G23190,AT1G23200
Chr1	25214000	25215000	Chr1	25235000	25236000	22000	4.34242	27	3.02683e-12	5.23458e-09	25214000	25216000	25235000	25236000	41	1	AT1G67328,AT1G67330	AT1G67350
Chr1	4755000	4756000	Chr1	4776000	4777000	22000	4.34242	24	4.05975e-09	4.39087e-06	4754000	4756000	4776000	4777000	42	1	AT1G13900,AT1G13910	AT1G13960
Chr1	20413000	20414000	Chr1	20434000	20435000	22000	4.34242	19	1.18433e-05	0.00608503	20413000	20414000	20434000	20436000	36	1	AT1G54670,AT1G54680,AT1G54690	AT1G54740,AT1G54760,AT1G54770
Chr1	29746000	29747000	Chr1	29767000	29768000	22000	4.34242	21	5.49565e-08	4.82996e-05	29745000	29747000	29767000	29769000	36	0.5	AT1G79075,AT1G79080	AT1G79120
Chr1	11093000	11094000	Chr1	11114000	11115000	22000	4.34242	12	0.00013163	0.0478278	11093000	11094000	11114000	11115000	12	1	AT1G31070,AT1G31080,AT1G31090	AT1G31130
Chr1	27211000	27212000	Chr1	27232000	27233000	22000	4.34242	19	1.31314e-07	0.00010752	27211000	27212000	27232000	27233000	19	1	AT1G72270,AT1G72280	AT1G72310,AT1G72320
Chr1	25047000	25048000	Chr1	25068000	25069000	22000	4.34242	14	0.000114143	0.0424582	25047000	25048000	25068000	25069000	14	1	NA	AT1G67110,AT1G67120
Chr1	5342000	5343000	Chr1	5363000	5364000	22000	4.34242	15	7.31572e-06	0.00397778	5342000	5343000	5363000	5364000	15	1	AT1G15540,AT1G15550	AT1G15570,AT1G15580
Chr1	17700000	17701000	Chr1	17721000	17722000	22000	4.34242	15	5.83776e-05	0.0241157	17700000	17701000	17721000	17722000	15	1	AT1G47990	AT1G48040
Chr1	12158000	12159000	Chr1	12179000	12180000	22000	4.34242	12	2.71675e-05	0.012483	12158000	12159000	12179000	12180000	12	1	AT1G33520	AT1G33590
Chr1	4761000	4762000	Chr1	4782000	4783000	22000	4.34242	15	4.10076e-05	0.0178108	4761000	4762000	4782000	4783000	15	1	AT1G13920,AT1G13930	AT1G13970
Chr1	7264000	7265000	Chr1	7285000	7286000	22000	4.34242	17	1.77749e-06	0.00113145	7264000	7265000	7285000	7286000	17	1	AT1G20860,AT1G20870,AT1G20875,AT1G20880	AT1G20920
Chr1	21580000	21581000	Chr1	21601000	21602000	22000	4.34242	17	3.34466e-06	0.00199279	21580000	21581000	21601000	21602000	17	1	AT1G58235,AT1G58242	AT1G58250
Chr1	8105000	8106000	Chr1	8126000	8127000	22000	4.34242	16	8.53828e-06	0.00456464	8105000	8106000	8126000	8127000	16	1	AT1G22900,AT1G22910	AT1G22950
Chr1	24196000	24197000	Chr1	24217000	24218000	22000	4.34242	18	6.31184e-08	5.47732e-05	24196000	24197000	24217000	24218000	18	1	AT1G65120,AT1G65130,AT1G65140,AT1G65150,AT1G65160	AT1G65170,AT1G65180,AT1G65190,AT1G65200
Chr1	8688000	8689000	Chr1	8709000	8710000	22000	4.34242	13	0.000119588	0.0441416	8688000	8689000	8709000	8710000	13	1	AT1G24510,AT1G24520	AT1G24570,AT1G24580,AT1G24575,AT1G24577,AT1G24590
Chr1	24340000	24341000	Chr1	24361000	24362000	22000	4.34242	18	0.000134883	0.0488454	24340000	24341000	24361000	24362000	18	1	AT1G65481	AT1G65520
Chr1	10353000	10354000	Chr1	10374000	10375000	22000	4.34242	11	5.31779e-05	0.0222599	10353000	10354000	10374000	10375000	11	1	AT1G29630	AT1G29660
Chr1	19664000	19665000	Chr1	19685000	19686000	22000	4.34242	14	4.65042e-05	0.019838	19664000	19665000	19685000	19686000	14	1	AT1G52790,AT1G52800	AT1G52860,AT1G52870
Chr1	8974000	8975000	Chr1	8995000	8996000	22000	4.34242	17	1.38596e-06	0.000905574	8974000	8975000	8995000	8996000	17	1	AT1G25530,AT1G25540	AT1G25570
Chr1	26255000	26256000	Chr1	26276000	26277000	22000	4.34242	16	9.38745e-05	0.0361645	26255000	26256000	26276000	26277000	16	1	AT1G69780	AT1G69800,AT1G69810,AT1G69818,AT1G69820
Chr1	21334000	21335000	Chr1	21355000	21356000	22000	4.34242	15	4.76043e-06	0.00272884	21334000	21335000	21355000	21356000	15	1	AT1G57600	AT1G57650,AT1G57660,AT1G57670
Chr1	19154000	19155000	Chr1	19175000	19176000	22000	4.34242	17	6.19308e-05	0.0253399	19154000	19155000	19175000	19176000	17	1	AT1G51660	AT1G51700,AT1G51710
Chr1	2684000	2685000	Chr1	2705000	2706000	22000	4.34242	20	6.00738e-06	0.00334499	2684000	2685000	2705000	2706000	20	1	AT1G08460,AT1G08465,AT1G08470,AT1G08480,AT1G08490	AT1G08530,AT1G08540,AT1G08550
Chr1	7933000	7934000	Chr1	7954000	7955000	22000	4.34242	19	4.00057e-05	0.017434	7933000	7934000	7954000	7955000	19	1	AT1G22440,AT1G22450,AT1G22460,AT1G22470,AT1G22480,AT1G22490	AT1G22520
Chr1	17055000	17056000	Chr1	17076000	17077000	22000	4.34242	16	0.000135053	0.0489003	17055000	17056000	17076000	17077000	16	1	NA	AT1G45145,AT1G45150
Chr1	3240000	3241000	Chr1	3261000	3262000	22000	4.34242	13	3.37941e-05	0.0150634	3240000	3241000	3261000	3262000	13	1	AT1G09950	AT1G09980,AT1G09995,AT1G10000
Chr1	14004000	14005000	Chr1	14025000	14026000	22000	4.34242	13	2.60733e-05	0.0120468	14004000	14005000	14025000	14026000	13	1	AT1G36940,AT1G36942,AT1G36950	AT1G36960,AT1G36970,AT1G36980
Chr1	23383000	23384000	Chr1	23404000	23405000	22000	4.34242	17	2.84988e-05	0.0130132	23383000	23384000	23404000	23405000	17	1	AT1G63057,AT1G63060	AT1G63105,AT1G63110
Chr1	20554000	20555000	Chr1	20575000	20576000	22000	4.34242	13	5.16994e-06	0.00293392	20554000	20555000	20575000	20576000	13	1	AT1G55080,AT1G55090,AT1G55110	AT1G55140,AT1G55150
Chr1	12168000	12169000	Chr1	12189000	12190000	22000	4.34242	17	2.797e-06	0.00169704	12168000	12169000	12189000	12190000	17	1	AT1G33560	AT1G33610
Chr1	11373000	11374000	Chr1	11394000	11395000	22000	4.34242	19	1.15576e-06	0.000771434	11373000	11374000	11394000	11395000	19	1	AT1G31760	AT1G31780,AT1G31790
Chr1	923000	924000	Chr1	944000	945000	22000	4.34242	17	2.44418e-07	0.000189664	923000	924000	944000	945000	17	1	AT1G03670,AT1G03680,AT1G03687,AT1G03700,AT1G03710,AT1G03720	AT1G03760,AT1G03770,AT1G03780,AT1G03790
Chr2	10430000	10431000	Chr2	10451000	10452000	22000	4.34242	23	5.73913e-09	6.04986e-06	10430000	10434000	10449000	10452000	98	0.5	NA	AT2G24590,AT2G24592
Chr2	5931000	5932000	Chr2	5952000	5953000	22000	4.34242	19	3.88306e-07	0.000288641	5931000	5932000	5951000	5954000	50	1	AT2G14095,AT2G14100	AT2G14110
Chr2	1482000	1483000	Chr2	1503000	1504000	22000	4.34242	18	8.61889e-08	7.30407e-05	1481000	1483000	1503000	1504000	32	1	AT2G04280	AT2G04305
Chr2	6512000	6513000	Chr2	6533000	6534000	22000	4.34242	17	2.60227e-06	0.0015932	6512000	6513000	6533000	6535000	29	1	AT2G15042	AT2G15080
Chr2	13210000	13211000	Chr2	13231000	13232000	22000	4.34242	18	3.10067e-05	0.0139875	13210000	13211000	13231000	13233000	29	1	AT2G31040,AT2G31050	AT2G31081
Chr2	9394000	9395000	Chr2	9415000	9416000	22000	4.34242	14	5.39782e-05	0.0225499	9394000	9395000	9415000	9416000	14	1	AT2G22100,AT2G22110,AT2G22120	AT2G22140,AT2G22145
Chr2	12135000	12136000	Chr2	12156000	12157000	22000	4.34242	18	5.49408e-05	0.0228881	12135000	12136000	12156000	12157000	18	1	AT2G28380	AT2G28410
Chr2	18912000	18913000	Chr2	18933000	18934000	22000	4.34242	13	6.49522e-05	0.0263814	18912000	18913000	18933000	18934000	13	1	AT2G45970	AT2G46030
Chr2	1563000	1564000	Chr2	1584000	1585000	22000	4.34242	12	7.33338e-05	0.0292874	1563000	1564000	1584000	1585000	12	1	NA	AT2G04540
Chr2	12673000	12674000	Chr2	12694000	12695000	22000	4.34242	16	9.16945e-05	0.0354458	12673000	12674000	12694000	12695000	16	1	AT2G29640,AT2G29650	AT2G29690
Chr2	16591000	16592000	Chr2	16612000	16613000	22000	4.34242	19	1.02601e-05	0.0053701	16591000	16592000	16612000	16613000	19	1	AT2G39770,AT2G39780,AT2G39782	AT2G39805,AT2G39810,AT2G39820,AT2G39830
Chr2	17474000	17475000	Chr2	17495000	17496000	22000	4.34242	13	5.16754e-05	0.0217151	17474000	17475000	17495000	17496000	13	1	AT2G41880	AT2G41905,AT2G41910
Chr2	6690000	6691000	Chr2	6711000	6712000	22000	4.34242	16	1.24713e-05	0.00635904	6690000	6691000	6711000	6712000	16	1	AT2G15345,AT2G15350,AT2G15360	AT2G15390
Chr2	19649000	19650000	Chr2	19670000	19671000	22000	4.34242	14	6.34895e-05	0.025879	19649000	19650000	19670000	19671000	14	1	AT2G48030	AT2G48090,AT2G48100
Chr2	17231000	17232000	Chr2	17252000	17253000	22000	4.34242	22	1.10412e-07	9.16014e-05	17231000	17232000	17252000	17253000	22	1	AT2G41342,AT2G41350	AT2G41380
Chr2	17325000	17326000	Chr2	17346000	17347000	22000	4.34242	20	5.43419e-05	0.0226787	17325000	17326000	17346000	17347000	20	1	AT2G41530	AT2G41600,AT2G41610
Chr2	972000	973000	Chr2	993000	994000	22000	4.34242	13	6.27393e-05	0.0256127	972000	973000	993000	994000	13	1	AT2G03220,AT2G03230	AT2G03260,AT2G03270
Chr2	8844000	8845000	Chr2	8865000	8866000	22000	4.34242	19	4.77288e-06	0.00273497	8844000	8845000	8865000	8866000	19	1	AT2G20530,AT2G20540,AT2G20550	AT2G20585
Chr2	14581000	14582000	Chr2	14602000	14603000	22000	4.34242	19	5.14578e-07	0.000371877	14581000	14582000	14602000	14603000	19	1	AT2G34600,AT2G34610,AT2G34620,AT2G34630,AT2G34640	AT2G34660
Chr2	7053000	7054000	Chr2	7074000	7075000	22000	4.34242	19	9.92217e-08	8.30713e-05	7053000	7054000	7074000	7075000	19	1	AT2G16290,AT2G16300	AT2G16340,AT2G16365,AT2G16360
Chr2	1102000	1103000	Chr2	1123000	1124000	22000	4.34242	18	2.03729e-06	0.00127871	1102000	1103000	1123000	1124000	18	1	AT2G03610,AT2G03620,AT2G03630	AT2G03690,AT2G03700
Chr3	16588000	16589000	Chr3	16609000	16610000	22000	4.34242	24	1.55056e-10	2.10478e-07	16588000	16589000	16608000	16611000	61	1	NA	NA
Chr3	10738000	10739000	Chr3	10759000	10760000	22000	4.34242	15	2.09786e-06	0.00131354	10737000	10739000	10759000	10760000	29	1	AT3G28660	AT3G28695,AT3G28700
Chr3	22902000	22903000	Chr3	22923000	22924000	22000	4.34242	14	3.04907e-05	0.0137915	22902000	22903000	22923000	22925000	30	1	AT3G61860,AT3G61870	NA
Chr3	16548000	16549000	Chr3	16569000	16570000	22000	4.34242	12	0.000129639	0.0472104	16548000	16549000	16569000	16570000	12	1	AT3G45170,AT3G45180,AT3G45190,AT3G45200	AT3G45220,AT3G45230
Chr3	8140000	8141000	Chr3	8161000	8162000	22000	4.34242	18	1.14972e-06	0.000767861	8140000	8141000	8161000	8162000	18	1	AT3G22960	AT3G22980
Chr3	11103000	11104000	Chr3	11124000	11125000	22000	4.34242	16	2.63659e-06	0.00161192	11103000	11104000	11124000	11125000	16	1	AT3G29130	NA
Chr3	8383000	8384000	Chr3	8404000	8405000	22000	4.34242	13	3.78201e-05	0.0166185	8383000	8384000	8404000	8405000	13	1	AT3G23410,AT3G23420,AT3G23430	AT3G23440
Chr3	22188000	22189000	Chr3	22209000	22210000	22000	4.34242	15	4.03969e-05	0.0175829	22188000	22189000	22209000	22210000	15	1	AT3G60080,AT3G60090	AT3G60120
Chr3	16343000	16344000	Chr3	16364000	16365000	22000	4.34242	14	1.448e-05	0.00723057	16343000	16344000	16364000	16365000	14	1	AT3G44798,AT3G44800,AT3G44805	AT3G44820,AT3G44830,AT3G44840
Chr3	10287000	10288000	Chr3	10308000	10309000	22000	4.34242	11	0.00010794	0.0405976	10287000	10288000	10308000	10309000	11	1	AT3G27770	AT3G27809,AT3G27810
Chr3	11509000	11510000	Chr3	11530000	11531000	22000	4.34242	14	1.29913e-07	0.000106497	11509000	11510000	11530000	11531000	14	1	NA	NA
Chr3	5227000	5228000	Chr3	5248000	5249000	22000	4.34242	22	1.34715e-05	0.00679109	5227000	5228000	5248000	5249000	22	1	AT3G15480,AT3G15490	AT3G15518
Chr3	18196000	18197000	Chr3	18217000	18218000	22000	4.34242	19	0.000100073	0.0381066	18196000	18197000	18217000	18218000	19	1	AT3G49070,AT3G49080,AT3G49100	AT3G49120,AT3G49130,AT3G49140,AT3G49142,AT3G49150,AT3G49160,AT3G49170
Chr3	16168000	16169000	Chr3	16189000	16190000	22000	4.34242	11	4.24663e-05	0.0183398	16168000	16169000	16189000	16190000	11	1	AT3G44600	AT3G44610
Chr3	7285000	7286000	Chr3	7306000	7307000	22000	4.34242	15	1.63445e-05	0.00803417	7285000	7286000	7306000	7307000	15	1	AT3G20830	AT3G20840,AT3G20850,AT3G20860
Chr3	6704000	6705000	Chr3	6725000	6726000	22000	4.34242	17	2.37159e-05	0.0111037	6704000	6705000	6725000	6726000	17	1	AT3G19340,AT3G19350	AT3G19390,AT3G19400
Chr4	9747000	9748000	Chr4	9768000	9769000	22000	4.34242	38	9.76392e-21	4.57889e-17	9746000	9752000	9764000	9771000	455	0.452381	AT4G17483	AT4G17510
Chr4	2330000	2331000	Chr4	2351000	2352000	22000	4.34242	25	9.17449e-13	1.692e-09	2328000	2335000	2350000	2354000	273	0.571429	AT4G04620	AT4G04640
Chr4	5709000	5710000	Chr4	5730000	5731000	22000	4.34242	17	9.24581e-06	0.0048971	5709000	5710000	5729000	5731000	35	1	AT4G08910	AT4G08930,AT4G08940
Chr4	709000	710000	Chr4	730000	731000	22000	4.34242	13	2.1193e-05	0.0100822	708000	710000	730000	731000	27	1	AT4G01660	AT4G01690
Chr4	7654000	7655000	Chr4	7675000	7676000	22000	4.34242	20	4.35231e-08	3.9023e-05	7653000	7655000	7675000	7676000	39	1	AT4G13160,AT4G13170	AT4G13210,AT4G13220,AT4G13230,AT4G13235
Chr4	5994000	5995000	Chr4	6015000	6016000	22000	4.34242	18	2.67141e-07	0.000205838	5994000	5996000	6015000	6016000	37	1	AT4G09460	AT4G09490
Chr4	6778000	6779000	Chr4	6799000	6800000	22000	4.34242	12	9.70604e-07	0.000660435	6777000	6779000	6799000	6800000	22	1	AT4G11120	AT4G11140,AT4G11150
Chr4	13261000	13262000	Chr4	13282000	13283000	22000	4.34242	23	5.23009e-08	4.61849e-05	13261000	13263000	13282000	13283000	39	1	AT4G26180	AT4G26210
Chr4	2635000	2636000	Chr4	2656000	2657000	22000	4.34242	15	1.8228e-05	0.00883103	2635000	2636000	2656000	2657000	15	1	AT4G05130	AT4G05136,AT4G05140
Chr4	18553000	18554000	Chr4	18574000	18575000	22000	4.34242	15	6.33364e-05	0.0258226	18553000	18554000	18574000	18575000	15	1	AT4G40011,AT4G40020	AT4G40065
Chr4	1939000	1940000	Chr4	1960000	1961000	22000	4.34242	14	4.54294e-06	0.00261788	1939000	1940000	1960000	1961000	14	1	AT4G04040	AT4G04077,AT4G04078,AT4G04080,AT4G04090
Chr4	15507000	15508000	Chr4	15528000	15529000	22000	4.34242	15	1.04414e-06	0.000705106	15507000	15508000	15528000	15529000	15	1	AT4G32070,AT4G32080,AT4G32090	AT4G32160
Chr4	10963000	10964000	Chr4	10984000	10985000	22000	4.34242	20	5.80949e-06	0.00325274	10963000	10964000	10984000	10985000	20	1	AT4G20310	AT4G20330,AT4G20340
Chr4	17649000	17650000	Chr4	17670000	17671000	22000	4.34242	18	8.33943e-07	0.000576476	17649000	17650000	17670000	17671000	18	1	AT4G37553	AT4G37608,AT4G37610
Chr4	16752000	16753000	Chr4	16773000	16774000	22000	4.34242	15	1.73094e-05	0.00844279	16752000	16753000	16773000	16774000	15	1	AT4G35200,AT4G35210,AT4G35220	AT4G35250
Chr4	13006000	13007000	Chr4	13027000	13028000	22000	4.34242	16	6.2726e-05	0.0256114	13006000	13007000	13027000	13028000	16	1	AT4G25434,AT4G25435,AT4G25440	AT4G25500,AT4G25510
Chr4	9411000	9412000	Chr4	9432000	9433000	22000	4.34242	13	4.56669e-05	0.0195279	9411000	9412000	9432000	9433000	13	1	AT4G16740,AT4G16745	AT4G16765
Chr4	18556000	18557000	Chr4	18577000	18578000	22000	4.34242	13	0.000111843	0.0417581	18556000	18557000	18577000	18578000	13	1	AT4G40030	AT4G40070
Chr4	14324000	14325000	Chr4	14345000	14346000	22000	4.34242	17	9.13558e-05	0.0353324	14324000	14325000	14345000	14346000	17	1	AT4G29080	AT4G29103
Chr4	2695000	2696000	Chr4	2716000	2717000	22000	4.34242	13	0.000109438	0.0410479	2695000	2696000	2716000	2717000	13	1	AT4G05265,AT4G05270	AT4G05310
Chr4	10118000	10119000	Chr4	10139000	10140000	22000	4.34242	17	5.25644e-05	0.0220363	10118000	10119000	10139000	10140000	17	1	AT4G18290,AT4G18300	AT4G18340
Chr4	17229000	17230000	Chr4	17250000	17251000	22000	4.34242	18	0.000119413	0.0440854	17229000	17230000	17250000	17251000	18	1	AT4G36510,AT4G36515	AT4G36560
Chr4	6713000	6714000	Chr4	6734000	6735000	22000	4.34242	16	7.5382e-05	0.0299837	6713000	6714000	6734000	6735000	16	1	AT4G10950,AT4G10960,AT4G10955	AT4G11010,AT4G11020,AT4G11030
Chr5	17963000	17964000	Chr5	17984000	17985000	22000	4.34242	23	6.00919e-10	7.43295e-07	17962000	17966000	17984000	17986000	81	0.625	AT5G44569	AT5G44585
Chr5	8610000	8611000	Chr5	8631000	8632000	22000	4.34242	29	4.39578e-16	1.23836e-12	8608000	8611000	8631000	8633000	86	0.666667	AT5G24990	AT5G25050
Chr5	14545000	14546000	Chr5	14566000	14567000	22000	4.34242	12	8.96811e-06	0.00476422	14545000	14546000	14565000	14568000	36	1	AT5G36890,AT5G36900	AT5G36925
Chr5	8569000	8570000	Chr5	8590000	8591000	22000	4.34242	12	8.14119e-05	0.0319878	8569000	8570000	8589000	8591000	24	1	AT5G24900,AT5G24910	AT5G24930,AT5G24940,AT5G24950
Chr5	17084000	17085000	Chr5	17105000	17106000	22000	4.34242	25	2.07692e-09	2.34994e-06	17084000	17086000	17105000	17106000	43	1	NA	AT5G42660
Chr5	15482000	15483000	Chr5	15503000	15504000	22000	4.34242	18	8.10838e-08	6.90834e-05	15482000	15483000	15503000	15505000	37	1	AT5G38690	AT5G38710
Chr5	821000	822000	Chr5	842000	843000	22000	4.34242	14	2.2068e-05	0.0104396	821000	823000	842000	843000	31	1	AT5G03360	AT5G03406,AT5G03415
Chr5	11703000	11704000	Chr5	11724000	11725000	22000	4.34242	7	1.06859e-06	0.00071955	11702000	11704000	11724000	11725000	14	1	NA	NA
Chr5	26438000	26439000	Chr5	26459000	26460000	22000	4.34242	17	0.000121125	0.0446007	26438000	26439000	26459000	26460000	17	1	AT5G66140	AT5G66210,AT5G66211,AT5G66230,AT5G66220
Chr5	14282000	14283000	Chr5	14303000	14304000	22000	4.34242	14	5.29182e-05	0.0221643	14282000	14283000	14303000	14304000	14	1	AT5G36250	AT5G36290
Chr5	7315000	7316000	Chr5	7336000	7337000	22000	4.34242	19	1.38178e-08	1.36136e-05	7315000	7316000	7336000	7337000	19	1	AT5G22090	AT5G22120
Chr5	19354000	19355000	Chr5	19375000	19376000	22000	4.34242	26	2.68769e-13	5.29594e-10	19354000	19355000	19375000	19376000	26	1	AT5G47800	AT5G47840
Chr5	16378000	16379000	Chr5	16399000	16400000	22000	4.34242	33	7.45679e-12	1.22759e-08	16378000	16379000	16399000	16400000	33	1	AT5G40870,AT5G40880	AT5G40910
Chr5	21611000	21612000	Chr5	21632000	21633000	22000	4.34242	13	3.9325e-05	0.0171836	21611000	21612000	21632000	21633000	13	1	NA	AT5G53300
Chr5	21688000	21689000	Chr5	21709000	21710000	22000	4.34242	13	0.000111385	0.0416374	21688000	21689000	21709000	21710000	13	1	AT5G53450	AT5G53460
Chr5	17759000	17760000	Chr5	17780000	17781000	22000	4.34242	14	2.84704e-05	0.013004	17759000	17760000	17780000	17781000	14	1	NA	AT5G44160,AT5G44170
Chr5	12567000	12568000	Chr5	12588000	12589000	22000	4.34242	11	1.35217e-06	0.000885806	12567000	12568000	12588000	12589000	11	1	NA	AT5G33320
Chr5	7217000	7218000	Chr5	7238000	7239000	22000	4.34242	17	4.08559e-09	4.41453e-06	7217000	7218000	7238000	7239000	17	1	AT5G21326	AT5G21900
Chr5	827000	828000	Chr5	848000	849000	22000	4.34242	17	3.69869e-06	0.00217885	827000	828000	848000	849000	17	1	AT5G03370	AT5G03420,AT5G03430
Chr5	3597000	3598000	Chr5	3618000	3619000	22000	4.34242	16	0.000129261	0.0471058	3597000	3598000	3618000	3619000	16	1	AT5G11270,AT5G11280,AT5G11290	AT5G11330
Chr5	21607000	21608000	Chr5	21628000	21629000	22000	4.34242	14	3.29234e-05	0.0147316	21607000	21608000	21628000	21629000	14	1	AT5G53240,AT5G53250,AT5G53260,AT5G53270,AT5G53280	NA
Chr5	9638000	9639000	Chr5	9659000	9660000	22000	4.34242	14	7.24259e-05	0.028971	9638000	9639000	9659000	9660000	14	1	NA	AT5G27360
Chr5	25159000	25160000	Chr5	25180000	25181000	22000	4.34242	14	2.15999e-06	0.00134875	25159000	25160000	25180000	25181000	14	1	AT5G62670	NA
Chr5	4222000	4223000	Chr5	4243000	4244000	22000	4.34242	14	2.59688e-05	0.0120074	4222000	4223000	4243000	4244000	14	1	AT5G13225,AT5G13230	AT5G13260
Chr5	13634000	13635000	Chr5	13655000	13656000	22000	4.34242	16	5.40503e-07	0.000388877	13634000	13635000	13655000	13656000	16	1	AT5G35410	NA
Chr5	15070000	15071000	Chr5	15091000	15092000	22000	4.34242	15	1.57052e-06	0.0010123	15070000	15071000	15091000	15092000	15	1	AT5G37860,AT5G37870	AT5G37890,AT5G37900,AT5G37910
Chr5	8979000	8980000	Chr5	9000000	9001000	22000	4.34242	17	4.55778e-09	4.88199e-06	8979000	8980000	9000000	9001000	17	1	AT5G25790,AT5G25800	AT5G25820
Chr5	3647000	3648000	Chr5	3668000	3669000	22000	4.34242	14	2.77665e-05	0.0127261	3647000	3648000	3668000	3669000	14	1	AT5G11420,AT5G11425,AT5G11430	AT5G11475
Chr5	14947000	14948000	Chr5	14968000	14969000	22000	4.34242	10	0.000114219	0.0424741	14947000	14948000	14968000	14969000	10	1	AT5G37630,AT5G37640	AT5G37667,AT5G37670
Chr5	17268000	17269000	Chr5	17289000	17290000	22000	4.34242	17	1.3694e-08	1.35104e-05	17268000	17269000	17289000	17290000	17	1	AT5G43050	AT5G43070
Chr5	16646000	16647000	Chr5	16667000	16668000	22000	4.34242	17	2.00909e-08	1.91956e-05	16646000	16647000	16667000	16668000	17	1	AT5G41614,AT5G41620	AT5G41670,AT5G41675,AT5G41680
Chr5	3106000	3107000	Chr5	3127000	3128000	22000	4.34242	24	4.68257e-12	7.9339e-09	3106000	3107000	3127000	3128000	24	1	AT5G09960	AT5G10000,AT5G10010
Chr5	25588000	25589000	Chr5	25609000	25610000	22000	4.34242	14	5.79479e-06	0.00324591	25588000	25589000	25609000	25610000	14	1	AT5G63940	AT5G63970,AT5G63980
Chr5	1075000	1076000	Chr5	1096000	1097000	22000	4.34242	12	9.00665e-05	0.0348998	1075000	1076000	1096000	1097000	12	1	AT5G03980,AT5G03990	AT5G04045,AT5G04047,AT5G04050
Chr5	4383000	4384000	Chr5	4404000	4405000	22000	4.34242	15	6.74166e-06	0.00370477	4383000	4384000	4404000	4405000	15	1	AT5G13610	AT5G13660
Chr5	5788000	5789000	Chr5	5809000	5810000	22000	4.34242	20	2.81932e-07	0.0002161	5788000	5789000	5809000	5810000	20	1	AT5G17550,AT5G17560	AT5G17630
Chr5	9596000	9597000	Chr5	9617000	9618000	22000	4.34242	20	6.92068e-10	8.47681e-07	9596000	9597000	9617000	9618000	20	1	AT5G27238,AT5G27240	AT5G27280
Chr5	10192000	10193000	Chr5	10213000	10214000	22000	4.34242	9	0.000138487	0.0499528	10192000	10193000	10213000	10214000	9	1	AT5G28210,AT5G28220	AT5G28237
Chr5	20650000	20651000	Chr5	20671000	20672000	22000	4.34242	20	5.67211e-07	0.000406326	20650000	20651000	20671000	20672000	20	1	AT5G50770,AT5G50780	AT5G50800,AT5G50801
Chr5	6805000	6806000	Chr5	6826000	6827000	22000	4.34242	13	1.79732e-05	0.0087315	6805000	6806000	6826000	6827000	13	1	AT5G20160,AT5G20165	AT5G20230
Chr5	26358000	26359000	Chr5	26379000	26380000	22000	4.34242	14	1.43798e-05	0.00718883	26358000	26359000	26379000	26380000	14	1	AT5G65890,AT5G65900	AT5G65940
Chr5	9944000	9945000	Chr5	9965000	9966000	22000	4.34242	14	7.51143e-05	0.0298925	9944000	9945000	9965000	9966000	14	1	AT5G27920	NA
Chr5	5652000	5653000	Chr5	5673000	5674000	22000	4.34242	18	1.53169e-05	0.00759576	5652000	5653000	5673000	5674000	18	1	AT5G17180,AT5G17190	AT5G17250
Chr5	2066000	2067000	Chr5	2087000	2088000	22000	4.34242	24	1.20994e-06	0.000803085	2066000	2067000	2087000	2088000	24	1	AT5G06700	AT5G06740,AT5G06750
Chr5	20132000	20133000	Chr5	20153000	20154000	22000	4.34242	16	1.1626e-05	0.0059885	20132000	20133000	20153000	20154000	16	1	AT5G49610,AT5G49615,AT5G49620	AT5G49650
Chr5	8468000	8469000	Chr5	8489000	8490000	22000	4.34242	14	8.29056e-05	0.0324942	8468000	8469000	8489000	8490000	14	1	AT5G24710,AT5G24735	AT5G24740
Chr5	441000	442000	Chr5	462000	463000	22000	4.34242	13	3.94251e-05	0.0172196	441000	442000	462000	463000	13	1	AT5G02220	AT5G02260
Chr5	58000	59000	Chr5	79000	80000	22000	4.34242	16	1.82425e-08	1.75851e-05	58000	59000	79000	80000	16	1	AT5G01170	NA
Chr1	14149000	14150000	Chr1	14169000	14170000	21000	4.32222	30	7.6511e-16	2.08444e-12	14147000	14151000	14165000	14170000	234	0.6	NA	AT1G37140
Chr1	21028000	21029000	Chr1	21048000	21049000	21000	4.32222	24	2.43406e-08	2.28847e-05	21027000	21029000	21048000	21050000	51	0.75	AT1G56180,AT1G56190	AT1G56230
Chr1	10689000	10690000	Chr1	10709000	10710000	21000	4.32222	21	4.13987e-09	4.47069e-06	10689000	10691000	10708000	10710000	66	0.75	AT1G30330	AT1G30350
Chr1	22866000	22867000	Chr1	22886000	22887000	21000	4.32222	27	2.27401e-07	0.000177558	22866000	22868000	22885000	22887000	62	0.75	AT1G61860,AT1G61870,AT1G61880	NA
Chr1	12465000	12466000	Chr1	12485000	12486000	21000	4.32222	17	9.25107e-07	0.000633468	12465000	12467000	12485000	12487000	45	0.75	AT1G34220	AT1G34260
Chr1	29748000	29749000	Chr1	29768000	29769000	21000	4.32222	37	2.03552e-17	6.6752e-14	29748000	29750000	29767000	29769000	94	0.75	AT1G79080	AT1G79120
Chr1	9357000	9358000	Chr1	9377000	9378000	21000	4.32222	13	3.10055e-05	0.0139875	9356000	9358000	9377000	9379000	28	0.5	AT1G26960,AT1G26970,AT1G26973,AT1G26975,AT1G26976,AT1G26985	AT1G27000,AT1G27008
Chr1	14285000	14286000	Chr1	14305000	14306000	21000	4.32222	20	1.25214e-07	0.000102927	14285000	14287000	14305000	14306000	35	1	NA	NA
Chr1	16851000	16852000	Chr1	16871000	16872000	21000	4.32222	12	2.09666e-05	0.00998546	16850000	16852000	16871000	16872000	22	1	AT1G44446	AT1G44575
Chr1	25944000	25945000	Chr1	25964000	25965000	21000	4.32222	25	8.77759e-07	0.000604186	25944000	25945000	25964000	25965000	25	1	AT1G69010,AT1G69020	AT1G69060,AT1G69070,AT1G69080
Chr1	28095000	28096000	Chr1	28115000	28116000	21000	4.32222	16	3.38566e-05	0.0150858	28095000	28096000	28115000	28116000	16	1	AT1G74770,AT1G74780	AT1G74810,AT1G74820,AT1G74830,AT1G74840
Chr1	7448000	7449000	Chr1	7468000	7469000	21000	4.32222	12	0.00010676	0.040218	7448000	7449000	7468000	7469000	12	1	AT1G21280,AT1G21281	NA
Chr1	13126000	13127000	Chr1	13146000	13147000	21000	4.32222	16	2.0167e-07	0.000159081	13126000	13127000	13146000	13147000	16	1	NA	NA
Chr1	20306000	20307000	Chr1	20326000	20327000	21000	4.32222	13	4.199e-05	0.0181634	20306000	20307000	20326000	20327000	13	1	AT1G54380,AT1G54385,AT1G54390	AT1G54440
Chr1	24755000	24756000	Chr1	24775000	24776000	21000	4.32222	19	6.60242e-05	0.026739	24755000	24756000	24775000	24776000	19	1	AT1G66370,AT1G66380	AT1G66410,AT1G66420,AT1G66430,AT1G66440
Chr1	11718000	11719000	Chr1	11738000	11739000	21000	4.32222	21	1.60532e-07	0.0001294	11718000	11719000	11738000	11739000	21	1	AT1G32450	AT1G32460
Chr1	28307000	28308000	Chr1	28327000	28328000	21000	4.32222	19	5.82073e-07	0.000416168	28307000	28308000	28327000	28328000	19	1	AT1G75420,AT1G75430	AT1G75460
Chr1	12562000	12563000	Chr1	12582000	12583000	21000	4.32222	14	5.37959e-06	0.00303904	12562000	12563000	12582000	12583000	14	1	AT1G34392	AT1G34410,AT1G34418,AT1G34419
Chr1	21030000	21031000	Chr1	21050000	21051000	21000	4.32222	12	2.95597e-05	0.0134258	21030000	21031000	21050000	21051000	12	1	AT1G56190,AT1G56200	AT1G56233
Chr1	26966000	26967000	Chr1	26986000	26987000	21000	4.32222	17	1.20907e-05	0.00619255	26966000	26967000	26986000	26987000	17	1	AT1G71695,AT1G71696	AT1G71730,AT1G71740
Chr1	17179000	17180000	Chr1	17199000	17200000	21000	4.32222	26	6.33894e-11	9.13577e-08	17179000	17180000	17199000	17200000	26	1	AT1G45403,AT1G45474	AT1G45976
Chr1	19710000	19711000	Chr1	19730000	19731000	21000	4.32222	20	1.20956e-06	0.000802999	19710000	19711000	19730000	19731000	20	1	AT1G52910,AT1G52920,AT1G52930	AT1G52950
Chr1	7954000	7955000	Chr1	7974000	7975000	21000	4.32222	21	8.83678e-07	0.000607991	7954000	7955000	7974000	7975000	21	1	AT1G22520	NA
Chr1	21405000	21406000	Chr1	21425000	21426000	21000	4.32222	20	4.75143e-05	0.0202057	21405000	21406000	21425000	21426000	20	1	AT1G57780,AT1G57790,AT1G57800	AT1G57820,AT1G57830,AT1G57835,AT1G57850
Chr1	17011000	17012000	Chr1	17031000	17032000	21000	4.32222	15	4.01341e-06	0.0023437	17011000	17012000	17031000	17032000	15	1	AT1G45000	AT1G45050
Chr1	23087000	23088000	Chr1	23107000	23108000	21000	4.32222	17	5.82203e-06	0.00325859	23087000	23088000	23107000	23108000	17	1	AT1G62390,AT1G62400	AT1G62420,AT1G62430
Chr1	20652000	20653000	Chr1	20672000	20673000	21000	4.32222	20	2.81721e-05	0.0128874	20652000	20653000	20672000	20673000	20	1	AT1G55340	NA
Chr1	1534000	1535000	Chr1	1554000	1555000	21000	4.32222	18	4.29565e-05	0.0185197	1534000	1535000	1554000	1555000	18	1	AT1G05260,AT1G05270,AT1G05280	AT1G05320
Chr1	7351000	7352000	Chr1	7371000	7372000	21000	4.32222	11	3.62571e-05	0.0160302	7351000	7352000	7371000	7372000	11	1	NA	AT1G21060
Chr2	10589000	10590000	Chr2	10609000	10610000	21000	4.32222	47	2.85824e-33	5.21686e-29	10587000	10592000	10609000	10612000	266	0.8	AT2G24870,AT2G24880	AT2G24940,AT2G24945
Chr2	18228000	18229000	Chr2	18248000	18249000	21000	4.32222	23	2.06543e-06	0.0012948	18226000	18229000	18248000	18249000	61	1	AT2G44060,AT2G44065	AT2G44110
Chr2	632000	633000	Chr2	652000	653000	21000	4.32222	38	3.88658e-17	1.22943e-13	632000	634000	652000	654000	70	0.75	AT2G02400,AT2G02410	AT2G02470
Chr2	1624000	1625000	Chr2	1644000	1645000	21000	4.32222	22	1.04239e-09	1.23872e-06	1624000	1625000	1644000	1647000	56	1	AT2G04650,AT2G04660	AT2G04675,AT2G04680,AT2G04690
Chr2	5960000	5961000	Chr2	5980000	5981000	21000	4.32222	11	4.00865e-06	0.00234122	5959000	5961000	5980000	5981000	24	1	AT2G14120	AT2G14170
Chr2	15368000	15369000	Chr2	15388000	15389000	21000	4.32222	21	4.68314e-07	0.000341586	15367000	15369000	15388000	15389000	35	1	AT2G36670,AT2G36680	AT2G36710
Chr2	11975000	11976000	Chr2	11995000	11996000	21000	4.32222	14	6.97157e-05	0.028047	11975000	11976000	11995000	11996000	14	1	AT2G28100	AT2G28140
Chr2	12094000	12095000	Chr2	12114000	12115000	21000	4.32222	14	2.2939e-05	0.0107972	12094000	12095000	12114000	12115000	14	1	AT2G28315,AT2G28320	AT2G28350
Chr2	1876000	1877000	Chr2	1896000	1897000	21000	4.32222	17	2.1594e-08	2.04907e-05	1876000	1877000	1896000	1897000	17	1	AT2G05180,AT2G05185	AT2G05220,AT2G05230
Chr2	6927000	6928000	Chr2	6947000	6948000	21000	4.32222	16	6.16809e-05	0.0252536	6927000	6928000	6947000	6948000	16	1	AT2G15900	AT2G15960
Chr2	6651000	6652000	Chr2	6671000	6672000	21000	4.32222	18	2.62414e-06	0.00160519	6651000	6652000	6671000	6672000	18	1	AT2G15300	AT2G15325,AT2G15327
Chr2	6482000	6483000	Chr2	6502000	6503000	21000	4.32222	14	6.96286e-05	0.0280149	6482000	6483000	6502000	6503000	14	1	AT2G15000,AT2G15010	AT2G15025,AT2G15029
Chr2	11825000	11826000	Chr2	11845000	11846000	21000	4.32222	19	4.68588e-06	0.00269246	11825000	11826000	11845000	11846000	19	1	AT2G27760	AT2G27780
Chr2	286000	287000	Chr2	306000	307000	21000	4.32222	19	1.22225e-05	0.00625225	286000	287000	306000	307000	19	1	AT2G01650	AT2G01680
Chr2	15080000	15081000	Chr2	15100000	15101000	21000	4.32222	14	8.15492e-05	0.032032	15080000	15081000	15100000	15101000	14	1	AT2G35920	NA
Chr2	18951000	18952000	Chr2	18971000	18972000	21000	4.32222	17	1.29914e-05	0.00658965	18951000	18952000	18971000	18972000	17	1	AT2G46090	AT2G46180,AT2G46190
Chr2	9065000	9066000	Chr2	9085000	9086000	21000	4.32222	14	0.000127463	0.0465598	9065000	9066000	9085000	9086000	14	1	AT2G21140,AT2G21150	AT2G21210,AT2G21220
Chr2	6790000	6791000	Chr2	6810000	6811000	21000	4.32222	12	5.72729e-05	0.02373	6790000	6791000	6810000	6811000	12	1	AT2G15560	AT2G15590,AT2G15610,AT2G15620
Chr2	16029000	16030000	Chr2	16049000	16050000	21000	4.32222	17	0.000122553	0.0450222	16029000	16030000	16049000	16050000	17	1	NA	AT2G38300,AT2G38304
Chr2	15124000	15125000	Chr2	15144000	15145000	21000	4.32222	15	2.65549e-05	0.0122362	15124000	15125000	15144000	15145000	15	1	AT2G36020,AT2G36026,AT2G36030	AT2G36060,AT2G36070
Chr2	8813000	8814000	Chr2	8833000	8834000	21000	4.32222	17	4.93458e-05	0.0208795	8813000	8814000	8833000	8834000	17	1	AT2G20440,AT2G20450	AT2G20465,AT2G20470,AT2G20480,AT2G20490,AT2G20495,AT2G20500
Chr2	15086000	15087000	Chr2	15106000	15107000	21000	4.32222	12	6.38391e-05	0.0260071	15086000	15087000	15106000	15107000	12	1	NA	AT2G35950,AT2G35960
Chr2	369000	370000	Chr2	389000	390000	21000	4.32222	16	3.23915e-05	0.0145287	369000	370000	389000	390000	16	1	AT2G01830	AT2G01860,AT2G01870
Chr2	372000	373000	Chr2	392000	393000	21000	4.32222	18	3.54806e-05	0.0157247	372000	373000	392000	393000	18	1	NA	AT2G01880
Chr3	9721000	9722000	Chr3	9741000	9742000	21000	4.32222	45	3.46793e-25	2.60777e-21	9719000	9724000	9736000	9742000	581	0.766667	NA	NA
Chr3	11790000	11791000	Chr3	11810000	11811000	21000	4.32222	13	4.70509e-06	0.0027023	11785000	11791000	11810000	11814000	363	0.75	NA	AT3G30180
Chr3	1990000	1991000	Chr3	2010000	2011000	21000	4.32222	18	4.95044e-07	0.000359108	1990000	1996000	2010000	2013000	160	0.5	AT3G06480,AT3G06483	NA
Chr3	10331000	10332000	Chr3	10351000	10352000	21000	4.32222	22	1.5872e-09	1.82722e-06	10328000	10332000	10350000	10354000	118	0.5	AT3G27870	AT3G27890
Chr3	1051000	1052000	Chr3	1071000	1072000	21000	4.32222	21	6.26632e-08	5.43903e-05	1051000	1055000	1070000	1073000	119	0.5	AT3G04050	AT3G04080,AT3G04090,AT3G04100
Chr3	9377000	9378000	Chr3	9397000	9398000	21000	4.32222	26	3.37025e-13	6.55613e-10	9377000	9379000	9397000	9399000	55	0.75	AT3G25717	AT3G25730,AT3G25740
Chr3	16584000	16585000	Chr3	16604000	16605000	21000	4.32222	18	2.29378e-06	0.00142404	16584000	16585000	16604000	16606000	32	1	AT3G45248,AT3G45252	AT3G45275
Chr3	11168000	11169000	Chr3	11188000	11189000	21000	4.32222	22	8.56432e-12	1.4007e-08	11168000	11170000	11188000	11189000	32	1	NA	AT3G29230
Chr3	10451000	10452000	Chr3	10471000	10472000	21000	4.32222	18	2.01289e-10	2.68363e-07	10451000	10452000	10470000	10472000	36	1	AT3G28060,AT3G28070,AT3G28080	AT3G28140,AT3G28150
Chr3	18402000	18403000	Chr3	18422000	18423000	21000	4.32222	14	3.95031e-05	0.0172489	18402000	18403000	18421000	18423000	30	1	AT3G49630,AT3G49640	AT3G49680
Chr3	7844000	7845000	Chr3	7864000	7865000	21000	4.32222	25	1.47792e-11	2.3447e-08	7844000	7845000	7864000	7866000	45	1	AT3G22230,AT3G22231	AT3G22240
Chr3	17549000	17550000	Chr3	17569000	17570000	21000	4.32222	19	3.38625e-06	0.00201463	17549000	17550000	17569000	17570000	19	1	AT3G47610	AT3G47640,AT3G47650
Chr3	16070000	16071000	Chr3	16090000	16091000	21000	4.32222	20	4.411e-07	0.000323985	16070000	16071000	16090000	16091000	20	1	AT3G44440	AT3G44480
Chr3	17398000	17399000	Chr3	17418000	17419000	21000	4.32222	11	7.73695e-06	0.00418492	17398000	17399000	17418000	17419000	11	1	NA	NA
Chr3	8143000	8144000	Chr3	8163000	8164000	21000	4.32222	11	1.45197e-05	0.00724944	8143000	8144000	8163000	8164000	11	1	AT3G22961	AT3G22980,AT3G22990
Chr3	17234000	17235000	Chr3	17254000	17255000	21000	4.32222	21	9.26051e-06	0.00490288	17234000	17235000	17254000	17255000	21	1	AT3G46790,AT3G46800	AT3G46840
Chr3	10914000	10915000	Chr3	10934000	10935000	21000	4.32222	18	2.96249e-05	0.0134515	10914000	10915000	10934000	10935000	18	1	NA	AT3G28918
Chr3	4135000	4136000	Chr3	4155000	4156000	21000	4.32222	17	8.52337e-05	0.033304	4135000	4136000	4155000	4156000	17	1	AT3G12950,AT3G12955	AT3G12980
Chr3	18052000	18053000	Chr3	18072000	18073000	21000	4.32222	18	5.9664e-06	0.00332599	18052000	18053000	18072000	18073000	18	1	AT3G48740	AT3G48750
Chr3	8898000	8899000	Chr3	8918000	8919000	21000	4.32222	26	9.98918e-09	1.00856e-05	8898000	8899000	8918000	8919000	26	1	AT3G24460,AT3G24465	AT3G24495,AT3G24500
Chr3	16631000	16632000	Chr3	16651000	16652000	21000	4.32222	17	1.01207e-05	0.00530486	16631000	16632000	16651000	16652000	17	1	AT3G45320,AT3G45330	AT3G45400
Chr3	6480000	6481000	Chr3	6500000	6501000	21000	4.32222	13	5.52534e-05	0.0229986	6480000	6481000	6500000	6501000	13	1	AT3G18800,AT3G18810	AT3G18850
Chr3	8176000	8177000	Chr3	8196000	8197000	21000	4.32222	14	1.12901e-05	0.00583983	8176000	8177000	8196000	8197000	14	1	AT3G23010,AT3G23020	AT3G23050
Chr3	10940000	10941000	Chr3	10960000	10961000	21000	4.32222	20	2.60292e-07	0.000200999	10940000	10941000	10960000	10961000	20	1	AT3G28920	AT3G28925,AT3G28930
Chr3	17162000	17163000	Chr3	17182000	17183000	21000	4.32222	16	8.14556e-05	0.0320017	17162000	17163000	17182000	17183000	16	1	AT3G46610,AT3G46613	AT3G46630,AT3G46640
Chr3	20788000	20789000	Chr3	20808000	20809000	21000	4.32222	20	7.88809e-08	6.73951e-05	20788000	20789000	20808000	20809000	20	1	AT3G56010	AT3G56060,AT3G56070
Chr3	384000	385000	Chr3	404000	405000	21000	4.32222	17	3.6947e-05	0.0162846	384000	385000	404000	405000	17	1	AT3G02130	AT3G02180
Chr4	9432000	9433000	Chr4	9452000	9453000	21000	4.32222	37	1.10053e-21	5.71229e-18	9432000	9433000	9451000	9456000	117	1	AT4G16765	AT4G16790
Chr4	6780000	6781000	Chr4	6800000	6801000	21000	4.32222	26	8.92901e-11	1.25818e-07	6780000	6781000	6799000	6803000	75	1	AT4G11120,AT4G11130	AT4G11150
Chr4	1446000	1447000	Chr4	1466000	1467000	21000	4.32222	17	3.98196e-08	3.59512e-05	1445000	1447000	1466000	1467000	30	1	AT4G03298	AT4G03320,AT4G03330
Chr4	17986000	17987000	Chr4	18006000	18007000	21000	4.32222	16	1.46172e-06	0.000950123	17986000	17987000	18006000	18008000	29	1	AT4G38430	AT4G38480,AT4G38490
Chr4	18555000	18556000	Chr4	18575000	18576000	21000	4.32222	23	1.8971e-10	2.53752e-07	18555000	18556000	18574000	18576000	42	1	AT4G40020,AT4G40030	AT4G40065
Chr4	14355000	14356000	Chr4	14375000	14376000	21000	4.32222	24	1.62634e-11	2.56239e-08	14355000	14356000	14375000	14377000	40	1	AT4G29130	NA
Chr4	9751000	9752000	Chr4	9771000	9772000	21000	4.32222	14	5.50684e-05	0.0229327	9751000	9752000	9771000	9772000	14	1	AT4G17486	AT4G17520
Chr4	14087000	14088000	Chr4	14107000	14108000	21000	4.32222	13	0.000137628	0.0496776	14087000	14088000	14107000	14108000	13	1	AT4G28510,AT4G28520	AT4G28540
Chr4	17529000	17530000	Chr4	17549000	17550000	21000	4.32222	22	5.53387e-07	0.000397192	17529000	17530000	17549000	17550000	22	1	AT4G37250	AT4G37280,AT4G37290
Chr4	14811000	14812000	Chr4	14831000	14832000	21000	4.32222	18	1.73118e-06	0.00110477	14811000	14812000	14831000	14832000	18	1	AT4G30250	AT4G30290,AT4G30300,AT4G30310,AT4G30320
Chr4	11354000	11355000	Chr4	11374000	11375000	21000	4.32222	24	1.64359e-08	1.59844e-05	11354000	11355000	11374000	11375000	24	1	AT4G21340	AT4G21362
Chr4	9920000	9921000	Chr4	9940000	9941000	21000	4.32222	20	1.54148e-06	0.000995725	9920000	9921000	9940000	9941000	20	1	AT4G17840,AT4G17850	AT4G17895
Chr4	592000	593000	Chr4	612000	613000	21000	4.32222	14	6.85251e-05	0.0276309	592000	593000	612000	613000	14	1	NA	AT4G01455
Chr4	9436000	9437000	Chr4	9456000	9457000	21000	4.32222	14	2.24671e-06	0.00139718	9436000	9437000	9456000	9457000	14	1	AT4G16770	AT4G16800
Chr4	622000	623000	Chr4	642000	643000	21000	4.32222	15	1.06498e-06	0.000717309	622000	623000	642000	643000	15	1	AT4G01460	AT4G01510,AT4G01516
Chr4	17343000	17344000	Chr4	17363000	17364000	21000	4.32222	18	5.77242e-05	0.0238864	17343000	17344000	17363000	17364000	18	1	AT4G36808,AT4G36810	NA
Chr4	1081000	1082000	Chr4	1101000	1102000	21000	4.32222	22	3.68278e-06	0.00217079	1081000	1082000	1101000	1102000	22	1	AT4G02465,AT4G02480	AT4G02489,AT4G02500
Chr4	9721000	9722000	Chr4	9741000	9742000	21000	4.32222	13	1.98668e-05	0.00952643	9721000	9722000	9741000	9742000	13	1	AT4G17410	AT4G17460
Chr4	6423000	6424000	Chr4	6443000	6444000	21000	4.32222	17	2.39895e-08	2.25792e-05	6423000	6424000	6443000	6444000	17	1	AT4G10370	AT4G10390
Chr4	9728000	9729000	Chr4	9748000	9749000	21000	4.32222	10	2.78739e-05	0.0127683	9728000	9729000	9748000	9749000	10	1	AT4G17440	AT4G17483
Chr4	5974000	5975000	Chr4	5994000	5995000	21000	4.32222	14	8.85949e-05	0.0344136	5974000	5975000	5994000	5995000	14	1	AT4G09430,AT4G09432	AT4G09460
Chr4	10984000	10985000	Chr4	11004000	11005000	21000	4.32222	12	0.000103914	0.0393268	10984000	10985000	11004000	11005000	12	1	AT4G20330,AT4G20340	AT4G20380
Chr5	15911000	15912000	Chr5	15931000	15932000	21000	4.32222	44	2.24109e-19	9.16636e-16	15910000	15916000	15927000	15935000	428	0.354167	AT5G39760	AT5G39785
Chr5	5403000	5404000	Chr5	5423000	5424000	21000	4.32222	11	8.5259e-06	0.00456014	5403000	5408000	5420000	5425000	189	0.4	AT5G16530,AT5G16540	AT5G16570
Chr5	18205000	18206000	Chr5	18225000	18226000	21000	4.32222	27	6.70568e-14	1.42495e-10	18204000	18210000	18224000	18227000	184	0.5	NA	AT5G45105
Chr5	21662000	21663000	Chr5	21682000	21683000	21000	4.32222	22	3.80197e-08	3.44541e-05	21661000	21663000	21682000	21685000	63	0.666667	AT5G53400	AT5G53430
Chr5	18366000	18367000	Chr5	18386000	18387000	21000	4.32222	28	2.32872e-13	4.63441e-10	18366000	18368000	18385000	18388000	92	0.666667	AT5G45330	AT5G45360
Chr5	2602000	2603000	Chr5	2622000	2623000	21000	4.32222	15	5.10906e-06	0.00290435	2602000	2603000	2620000	2623000	47	1	AT5G08120	AT5G08150
Chr5	1437000	1438000	Chr5	1457000	1458000	21000	4.32222	21	1.91567e-06	0.0012095	1437000	1438000	1456000	1458000	39	1	AT5G04900,AT5G04910	AT5G04940,AT5G04950,AT5G04960
Chr5	16188000	16189000	Chr5	16208000	16209000	21000	4.32222	11	3.14945e-05	0.0141787	16187000	16189000	16208000	16209000	22	1	AT5G40450	AT5G40470
Chr5	17697000	17698000	Chr5	17717000	17718000	21000	4.32222	20	1.48031e-07	0.000120284	17697000	17698000	17716000	17718000	37	1	AT5G43990	AT5G44030
Chr5	9984000	9985000	Chr5	10004000	10005000	21000	4.32222	13	3.9274e-05	0.0171652	9984000	9985000	10004000	10005000	13	1	AT5G27950	AT5G27967,AT5G27970
Chr5	9553000	9554000	Chr5	9573000	9574000	21000	4.32222	15	1.48058e-05	0.00736863	9553000	9554000	9573000	9574000	15	1	AT5G27140,AT5G27150	AT5G27210,AT5G27220
Chr5	26089000	26090000	Chr5	26109000	26110000	21000	4.32222	19	4.97451e-05	0.0210095	26089000	26090000	26109000	26110000	19	1	AT5G65290	NA
Chr5	18182000	18183000	Chr5	18202000	18203000	21000	4.32222	19	2.38478e-07	0.000185536	18182000	18183000	18202000	18203000	19	1	AT5G45060	AT5G45090
Chr5	14566000	14567000	Chr5	14586000	14587000	21000	4.32222	11	6.49547e-05	0.0263814	14566000	14567000	14586000	14587000	11	1	AT5G36925	NA
Chr5	10784000	10785000	Chr5	10804000	10805000	21000	4.32222	8	9.47782e-05	0.0364512	10784000	10785000	10804000	10805000	8	1	AT5G28750	AT5G28780,AT5G28781
Chr5	24523000	24524000	Chr5	24543000	24544000	21000	4.32222	30	1.81536e-15	4.70974e-12	24523000	24524000	24543000	24544000	30	1	AT5G60940	AT5G60980
Chr5	6202000	6203000	Chr5	6222000	6223000	21000	4.32222	16	0.000120124	0.0443034	6202000	6203000	6222000	6223000	16	1	AT5G18620,AT5G18630	AT5G18660,AT5G18661
Chr5	10047000	10048000	Chr5	10067000	10068000	21000	4.32222	13	6.65927e-06	0.00366468	10047000	10048000	10067000	10068000	13	1	AT5G28052	NA
Chr5	18990000	18991000	Chr5	19010000	19011000	21000	4.32222	16	0.000126364	0.046217	18990000	18991000	19010000	19011000	16	1	AT5G46800,AT5G46810,AT5G46820	AT5G46845,AT5G46850
Chr5	21176000	21177000	Chr5	21196000	21197000	21000	4.32222	12	0.000134785	0.048819	21176000	21177000	21196000	21197000	12	1	AT5G52120	AT5G52150,AT5G52160,AT5G52170
Chr5	14899000	14900000	Chr5	14919000	14920000	21000	4.32222	13	5.81812e-05	0.0240436	14899000	14900000	14919000	14920000	13	1	AT5G37510	AT5G37550,AT5G37560
Chr5	1695000	1696000	Chr5	1715000	1716000	21000	4.32222	23	7.58683e-07	0.00052944	1695000	1696000	1715000	1716000	23	1	AT5G05660,AT5G05670	AT5G05700,AT5G05710
Chr5	13614000	13615000	Chr5	13634000	13635000	21000	4.32222	28	7.03492e-10	8.60723e-07	13614000	13615000	13634000	13635000	28	1	NA	AT5G35410
Chr5	1259000	1260000	Chr5	1279000	1280000	21000	4.32222	22	1.83723e-07	0.00014617	1259000	1260000	1279000	1280000	22	1	AT5G04460	AT5G04490
Chr5	6305000	6306000	Chr5	6325000	6326000	21000	4.32222	19	4.72341e-06	0.00271102	6305000	6306000	6325000	6326000	19	1	AT5G18870,AT5G18880,AT5G18890,AT5G18900,AT5G18910	AT5G18940
Chr5	7313000	7314000	Chr5	7333000	7334000	21000	4.32222	10	1.28925e-05	0.00654377	7313000	7314000	7333000	7334000	10	1	AT5G22080	AT5G22110
Chr5	4454000	4455000	Chr5	4474000	4475000	21000	4.32222	18	3.82461e-05	0.0167848	4454000	4455000	4474000	4475000	18	1	AT5G13800	AT5G13860,AT5G13870
Chr5	6856000	6857000	Chr5	6876000	6877000	21000	4.32222	14	0.00010386	0.0393178	6856000	6857000	6876000	6877000	14	1	AT5G20300,AT5G20310	AT5G20340,AT5G20350
Chr5	5616000	5617000	Chr5	5636000	5637000	21000	4.32222	16	1.46518e-05	0.0073018	5616000	5617000	5636000	5637000	16	1	AT5G17070,AT5G17073,AT5G17080,AT5G17090,AT5G17100	AT5G17110,AT5G17120,AT5G17130,AT5G17140,AT5G17150,AT5G17160
Chr5	14598000	14599000	Chr5	14618000	14619000	21000	4.32222	12	4.20765e-05	0.0181968	14598000	14599000	14618000	14619000	12	1	AT5G36950,AT5G36960,AT5G36970,AT5G36980	AT5G37000
Chr5	14256000	14257000	Chr5	14276000	14277000	21000	4.32222	13	8.64075e-05	0.0336935	14256000	14257000	14276000	14277000	13	1	AT5G36220	AT5G36230
Chr5	2893000	2894000	Chr5	2913000	2914000	21000	4.32222	19	1.56241e-06	0.00100782	2893000	2894000	2913000	2914000	19	1	AT5G09330	AT5G09380,AT5G09390,AT5G09400
Chr5	10780000	10781000	Chr5	10800000	10801000	21000	4.32222	13	1.14242e-06	0.000763579	10780000	10781000	10800000	10801000	13	1	AT5G28720,AT5G28730,AT5G28740	NA
Chr5	7810000	7811000	Chr5	7830000	7831000	21000	4.32222	19	4.702e-07	0.000342898	7810000	7811000	7830000	7831000	19	1	AT5G23200,AT5G23210	AT5G23250
Chr5	18799000	18800000	Chr5	18819000	18820000	21000	4.32222	18	1.39369e-05	0.00699307	18799000	18800000	18819000	18820000	18	1	AT5G46340,AT5G46350	AT5G46390
Chr5	14868000	14869000	Chr5	14888000	14889000	21000	4.32222	16	5.77328e-07	0.000413155	14868000	14869000	14888000	14889000	16	1	AT5G37475,AT5G37473	AT5G37490
Chr5	25801000	25802000	Chr5	25821000	25822000	21000	4.32222	17	3.2696e-05	0.0146425	25801000	25802000	25821000	25822000	17	1	AT5G64540,AT5G64541,AT5G64550,AT5G64552	AT5G64580,AT5G64590
Chr5	23406000	23407000	Chr5	23426000	23427000	21000	4.32222	15	2.9361e-05	0.0133489	23406000	23407000	23426000	23427000	15	1	AT5G57780,AT5G57785	AT5G57810,AT5G57815
Chr5	3495000	3496000	Chr5	3515000	3516000	21000	4.32222	14	1.13743e-05	0.005874	3495000	3496000	3515000	3516000	14	1	AT5G11030,AT5G11040	NA
Chr5	10856000	10857000	Chr5	10876000	10877000	21000	4.32222	13	6.68411e-06	0.003676	10856000	10857000	10876000	10877000	13	1	AT5G28830	AT5G28850
Chr5	14816000	14817000	Chr5	14836000	14837000	21000	4.32222	16	3.09178e-05	0.0139539	14816000	14817000	14836000	14837000	16	1	AT5G37370,AT5G37380	AT5G37400,AT5G37410
Chr5	8762000	8763000	Chr5	8782000	8783000	21000	4.32222	18	1.50229e-06	0.000973563	8762000	8763000	8782000	8783000	18	1	AT5G25270	AT5G25300
Chr5	825000	826000	Chr5	845000	846000	21000	4.32222	17	8.79535e-06	0.00468308	825000	826000	845000	846000	17	1	AT5G03360,AT5G03370	AT5G03415,AT5G03420
Chr5	773000	774000	Chr5	793000	794000	21000	4.32222	18	4.18888e-06	0.00243441	773000	774000	793000	794000	18	1	AT5G03240	AT5G03280,AT5G03285,AT5G03290
Chr5	25693000	25694000	Chr5	25713000	25714000	21000	4.32222	15	1.04486e-05	0.00545538	25693000	25694000	25713000	25714000	15	1	AT5G64230	AT5G64280
Chr1	4528000	4529000	Chr1	4547000	4548000	20000	4.30103	43	4.67369e-16	1.31285e-12	4528000	4533000	4547000	4549000	363	1	AT1G13250	AT1G13270,AT1G13280
Chr1	26235000	26236000	Chr1	26254000	26255000	20000	4.30103	23	6.2728e-05	0.0256114	26235000	26237000	26252000	26255000	50	0.5	AT1G69750	NA
Chr1	3767000	3768000	Chr1	3786000	3787000	20000	4.30103	20	1.55676e-09	1.7951e-06	3766000	3768000	3786000	3787000	39	1	AT1G11240	AT1G11270
Chr1	4097000	4098000	Chr1	4116000	4117000	20000	4.30103	32	5.98596e-08	5.21958e-05	4097000	4098000	4116000	4118000	55	1	NA	AT1G12120,AT1G12130,AT1G12140,AT1G12150,AT1G12160
Chr1	12890000	12891000	Chr1	12909000	12910000	20000	4.30103	22	1.40849e-08	1.38504e-05	12890000	12891000	12908000	12910000	39	1	AT1G35183,AT1G35190	AT1G35220
Chr1	11622000	11623000	Chr1	11641000	11642000	20000	4.30103	19	1.35605e-05	0.00682844	11621000	11623000	11641000	11642000	32	1	NA	AT1G32250,AT1G32260,AT1G32270,AT1G32280
Chr1	26128000	26129000	Chr1	26147000	26148000	20000	4.30103	20	4.84189e-05	0.0205398	26128000	26130000	26147000	26148000	38	1	AT1G69520	AT1G69540
Chr1	6442000	6443000	Chr1	6461000	6462000	20000	4.30103	36	3.87345e-15	9.67784e-12	6442000	6443000	6461000	6463000	55	1	AT1G18700	AT1G18730,AT1G18735
Chr1	29452000	29453000	Chr1	29471000	29472000	20000	4.30103	17	0.000134148	0.0486201	29452000	29453000	29471000	29472000	17	1	AT1G78270,AT1G78265,AT1G78280	AT1G78320,AT1G78340
Chr1	9845000	9846000	Chr1	9864000	9865000	20000	4.30103	13	5.54726e-05	0.0230763	9845000	9846000	9864000	9865000	13	1	AT1G28170,AT1G28180,AT1G28190	AT1G28220,AT1G28230
Chr1	27965000	27966000	Chr1	27984000	27985000	20000	4.30103	16	3.31183e-05	0.0148043	27965000	27966000	27984000	27985000	16	1	AT1G74390,AT1G74400,AT1G74410	AT1G74450,AT1G74453,AT1G74456,AT1G74458,AT1G74460,AT1G74470,AT1G74480,AT1G74490
Chr1	18631000	18632000	Chr1	18650000	18651000	20000	4.30103	16	2.66438e-06	0.00162661	18631000	18632000	18650000	18651000	16	1	AT1G50300	AT1G50360,AT1G50370
Chr1	27170000	27171000	Chr1	27189000	27190000	20000	4.30103	22	3.89027e-05	0.0170247	27170000	27171000	27189000	27190000	22	1	AT1G72200	AT1G72220,AT1G72230,AT1G72240,AT1G72250,AT1G72260
Chr1	28571000	28572000	Chr1	28590000	28591000	20000	4.30103	20	5.96328e-06	0.00332448	28571000	28572000	28590000	28591000	20	1	AT1G76140	AT1G76185,AT1G76190,AT1G76200,AT1G76210
Chr1	7347000	7348000	Chr1	7366000	7367000	20000	4.30103	17	1.60359e-05	0.00789896	7347000	7348000	7366000	7367000	17	1	AT1G21010	AT1G21050
Chr1	20515000	20516000	Chr1	20534000	20535000	20000	4.30103	23	1.57037e-09	1.80865e-06	20515000	20516000	20534000	20535000	23	1	AT1G55000,AT1G55010	AT1G55020,AT1G55030,AT1G55040,AT1G55045,AT1G55050
Chr1	20651000	20652000	Chr1	20670000	20671000	20000	4.30103	18	1.24381e-05	0.00634462	20651000	20652000	20670000	20671000	18	1	AT1G55340	NA
Chr1	17133000	17134000	Chr1	17152000	17153000	20000	4.30103	12	1.15809e-05	0.00596884	17133000	17134000	17152000	17153000	12	1	AT1G45207,AT1G45215,AT1G45221,AT1G45223	AT1G45243,AT1G45231,AT1G45233,AT1G45229,AT1G45234,AT1G45236,AT1G45238,AT1G45240,AT1G45242,AT1G45244,AT1G45246,AT1G45248
Chr1	21439000	21440000	Chr1	21458000	21459000	20000	4.30103	15	2.03553e-05	0.0097343	21439000	21440000	21458000	21459000	15	1	AT1G57980	AT1G58025
Chr1	21443000	21444000	Chr1	21462000	21463000	20000	4.30103	17	4.49185e-07	0.00032908	21443000	21444000	21462000	21463000	17	1	AT1G58007	AT1G58025
Chr1	10057000	10058000	Chr1	10076000	10077000	20000	4.30103	17	2.34462e-05	0.0109967	10057000	10058000	10076000	10077000	17	1	AT1G28630	AT1G28670
Chr1	24342000	24343000	Chr1	24361000	24362000	20000	4.30103	28	9.73295e-09	9.84226e-06	24342000	24343000	24361000	24362000	28	1	AT1G65483	AT1G65520
Chr1	20037000	20038000	Chr1	20056000	20057000	20000	4.30103	13	6.10002e-05	0.025024	20037000	20038000	20056000	20057000	13	1	AT1G53660,AT1G53670	AT1G53710,AT1G53720,AT1G53730
Chr1	5411000	5412000	Chr1	5430000	5431000	20000	4.30103	14	9.63468e-05	0.0369539	5411000	5412000	5430000	5431000	14	1	AT1G15740	AT1G15760,AT1G15770,AT1G15772,AT1G15780
Chr1	18386000	18387000	Chr1	18405000	18406000	20000	4.30103	14	2.09892e-05	0.00999377	18386000	18387000	18405000	18406000	14	1	AT1G49670,AT1G49680	AT1G49730
Chr1	4928000	4929000	Chr1	4947000	4948000	20000	4.30103	20	8.63594e-06	0.00460956	4928000	4929000	4947000	4948000	20	1	AT1G14390,AT1G14400,AT1G14410	AT1G14450,AT1G14455,AT1G14460,AT1G14470
Chr1	171000	172000	Chr1	190000	191000	20000	4.30103	18	2.31552e-05	0.0108819	171000	172000	190000	191000	18	1	AT1G01460,AT1G01470,AT1G01471	AT1G01510,AT1G01520
Chr1	16548000	16549000	Chr1	16567000	16568000	20000	4.30103	14	2.67316e-05	0.0123081	16548000	16549000	16567000	16568000	14	1	AT1G43770	AT1G43780
Chr1	18113000	18114000	Chr1	18132000	18133000	20000	4.30103	16	5.1657e-05	0.0217086	18113000	18114000	18132000	18133000	16	1	AT1G48960,AT1G48970	AT1G49005,AT1G49010,AT1G49015,AT1G49020,AT1G49030,AT1G49032
Chr1	1242000	1243000	Chr1	1261000	1262000	20000	4.30103	19	2.33151e-05	0.010949	1242000	1243000	1261000	1262000	19	1	AT1G04550,AT1G04555	AT1G04580,AT1G04590,AT1G04600
Chr2	17233000	17234000	Chr2	17252000	17253000	20000	4.30103	33	1.88592e-08	1.81078e-05	17233000	17237000	17251000	17253000	204	0.875	AT2G41350	AT2G41380
Chr2	10103000	10104000	Chr2	10122000	10123000	20000	4.30103	23	6.04198e-08	5.2637e-05	10103000	10106000	10120000	10123000	129	0.555556	AT2G23740,AT2G23755	AT2G23770
Chr2	8211000	8212000	Chr2	8230000	8231000	20000	4.30103	20	1.89406e-06	0.00119722	8210000	8212000	8229000	8232000	86	0.833333	NA	NA
Chr2	6714000	6715000	Chr2	6733000	6734000	20000	4.30103	22	8.11069e-09	8.32081e-06	6713000	6715000	6733000	6734000	36	1	AT2G15400	AT2G15420,AT2G15430
Chr2	17936000	17937000	Chr2	17955000	17956000	20000	4.30103	34	1.06282e-12	1.94626e-09	17936000	17938000	17955000	17956000	54	1	AT2G43140	AT2G43180,AT2G43190
Chr2	7802000	7803000	Chr2	7821000	7822000	20000	4.30103	19	4.86496e-08	4.32108e-05	7802000	7803000	7820000	7822000	35	1	AT2G17930,AT2G17940	AT2G17970,AT2G17972
Chr2	56000	57000	Chr2	75000	76000	20000	4.30103	25	3.0576e-15	7.72633e-12	56000	58000	75000	76000	41	1	NA	AT2G01050,AT2G01060,AT2G01070
Chr2	11601000	11602000	Chr2	11620000	11621000	20000	4.30103	15	1.44068e-05	0.00719866	11601000	11602000	11620000	11621000	15	1	AT2G27145,AT2G27150,AT2G27160	AT2G27170,AT2G27180
Chr2	11800000	11801000	Chr2	11819000	11820000	20000	4.30103	13	9.93965e-06	0.0052205	11800000	11801000	11819000	11820000	13	1	AT2G27660	AT2G27720,AT2G27730
Chr2	9666000	9667000	Chr2	9685000	9686000	20000	4.30103	14	0.000112161	0.041847	9666000	9667000	9685000	9686000	14	1	AT2G22730,AT2G22740	AT2G22770
Chr2	11362000	11363000	Chr2	11381000	11382000	20000	4.30103	14	8.52885e-05	0.0333173	11362000	11363000	11381000	11382000	14	1	NA	AT2G26710
Chr2	15511000	15512000	Chr2	15530000	15531000	20000	4.30103	20	7.58011e-07	0.000529066	15511000	15512000	15530000	15531000	20	1	AT2G36930,AT2G36940	AT2G36970,AT2G36980
Chr2	2272000	2273000	Chr2	2291000	2292000	20000	4.30103	16	2.53881e-05	0.0117816	2272000	2273000	2291000	2292000	16	1	AT2G05920	NA
Chr2	998000	999000	Chr2	1017000	1018000	20000	4.30103	11	0.000128413	0.046854	998000	999000	1017000	1018000	11	1	AT2G03280	AT2G03340
Chr2	529000	530000	Chr2	548000	549000	20000	4.30103	10	2.62503e-05	0.0121138	529000	530000	548000	549000	10	1	AT2G02100,AT2G02103	AT2G02140,AT2G02147,AT2G02148
Chr2	13153000	13154000	Chr2	13172000	13173000	20000	4.30103	16	4.86858e-05	0.0206395	13153000	13154000	13172000	13173000	16	1	AT2G30910	AT2G30942,AT2G30945
Chr2	5912000	5913000	Chr2	5931000	5932000	20000	4.30103	21	1.22452e-05	0.00626178	5912000	5913000	5931000	5932000	21	1	AT2G14050	AT2G14095,AT2G14100
Chr2	10121000	10122000	Chr2	10140000	10141000	20000	4.30103	17	8.69284e-05	0.0338542	10121000	10122000	10140000	10141000	17	1	AT2G23770	AT2G23810,AT2G23820,AT2G23830
Chr2	19670000	19671000	Chr2	19689000	19690000	20000	4.30103	19	1.78943e-07	0.00014279	19670000	19671000	19689000	19690000	19	1	AT2G48090,AT2G48100	AT2G48130,AT2G48140,AT2G48150,AT2G48160
Chr2	15492000	15493000	Chr2	15511000	15512000	20000	4.30103	19	3.45616e-05	0.0153647	15492000	15493000	15511000	15512000	19	1	AT2G36900	AT2G36930,AT2G36940
Chr2	14078000	14079000	Chr2	14097000	14098000	20000	4.30103	24	9.38854e-08	7.89949e-05	14078000	14079000	14097000	14098000	24	1	AT2G33200,AT2G33205,AT2G33210,AT2G33220,AT2G33230	AT2G33240,AT2G33250,AT2G33255,AT2G33260
Chr2	12178000	12179000	Chr2	12197000	12198000	20000	4.30103	24	2.41578e-06	0.00149076	12178000	12179000	12197000	12198000	24	1	AT2G28470,AT2G28480,AT2G28490	AT2G28507
Chr2	10402000	10403000	Chr2	10421000	10422000	20000	4.30103	13	3.23314e-05	0.0145093	10402000	10403000	10421000	10422000	13	1	AT2G24500,AT2G24510,AT2G24513	AT2G24530
Chr2	1359000	1360000	Chr2	1378000	1379000	20000	4.30103	14	3.12644e-05	0.0140915	1359000	1360000	1378000	1379000	14	1	AT2G04063,AT2G04066,AT2G04070,AT2G04080,AT2G04090	AT2G04100
Chr3	4112000	4113000	Chr3	4131000	4132000	20000	4.30103	19	1.66601e-09	1.91031e-06	4111000	4115000	4128000	4132000	204	0.5625	AT3G12915	AT3G12940
Chr3	1956000	1957000	Chr3	1975000	1976000	20000	4.30103	25	3.45517e-10	4.45229e-07	1956000	1960000	1975000	1977000	110	0.625	AT3G06420,AT3G06430	AT3G06440,AT3G06450
Chr3	11011000	11012000	Chr3	11030000	11031000	20000	4.30103	33	2.42389e-11	3.73126e-08	11010000	11013000	11029000	11031000	100	0.666667	AT3G29030	AT3G29033,AT3G29036,AT3G29034
Chr3	11077000	11078000	Chr3	11096000	11097000	20000	4.30103	18	4.24614e-06	0.00246309	11075000	11078000	11095000	11098000	57	0.444444	AT3G29100,AT3G29110	NA
Chr3	8139000	8140000	Chr3	8158000	8159000	20000	4.30103	28	1.45659e-14	3.39596e-11	8138000	8140000	8158000	8160000	64	0.75	AT3G22960	NA
Chr3	9607000	9608000	Chr3	9626000	9627000	20000	4.30103	26	1.43805e-17	4.7927e-14	9606000	9608000	9626000	9627000	37	1	AT3G26240	AT3G26270
Chr3	22379000	22380000	Chr3	22398000	22399000	20000	4.30103	26	1.93473e-09	2.19801e-06	22379000	22381000	22398000	22399000	46	1	AT3G60550	AT3G60590
Chr3	20684000	20685000	Chr3	20703000	20704000	20000	4.30103	18	7.5815e-07	0.000529116	20684000	20685000	20702000	20704000	31	1	AT3G55730	AT3G55760,AT3G55770,AT3G55780
Chr3	19304000	19305000	Chr3	19323000	19324000	20000	4.30103	23	1.01784e-07	8.5024e-05	19304000	19305000	19323000	19324000	23	1	AT3G52030,AT3G52040,AT3G52050	AT3G52105,AT3G52110,AT3G52115,AT3G52120,AT3G52130
Chr3	7684000	7685000	Chr3	7703000	7704000	20000	4.30103	23	2.00752e-07	0.00015842	7684000	7685000	7703000	7704000	23	1	AT3G21810	AT3G21865,AT3G21870
Chr3	5050000	5051000	Chr3	5069000	5070000	20000	4.30103	21	2.54959e-06	0.00156439	5050000	5051000	5069000	5070000	21	1	AT3G15000	AT3G15055,AT3G15060
Chr3	10501000	10502000	Chr3	10520000	10521000	20000	4.30103	12	5.55375e-05	0.0230959	10501000	10502000	10520000	10521000	12	1	AT3G28170	AT3G28210
Chr3	10291000	10292000	Chr3	10310000	10311000	20000	4.30103	12	5.27892e-05	0.0221198	10291000	10292000	10310000	10311000	12	1	NA	AT3G27810
Chr3	18057000	18058000	Chr3	18076000	18077000	20000	4.30103	26	9.46747e-08	7.95901e-05	18057000	18058000	18076000	18077000	26	1	NA	AT3G48760
Chr3	19433000	19434000	Chr3	19452000	19453000	20000	4.30103	13	4.45992e-05	0.0191398	19433000	19434000	19452000	19453000	13	1	AT3G52430	AT3G52480
Chr3	21854000	21855000	Chr3	21873000	21874000	20000	4.30103	18	2.31231e-05	0.01087	21854000	21855000	21873000	21874000	18	1	AT3G59100,AT3G59110,AT3G59120,AT3G59130	AT3G59150,AT3G59160,AT3G59170
Chr3	9685000	9686000	Chr3	9704000	9705000	20000	4.30103	17	0.000110609	0.0414032	9685000	9686000	9704000	9705000	17	1	AT3G26460	AT3G26490
Chr3	3644000	3645000	Chr3	3663000	3664000	20000	4.30103	15	0.000130412	0.047447	3644000	3645000	3663000	3664000	15	1	AT3G11560	AT3G11590,AT3G11591,AT3G11600
Chr3	17968000	17969000	Chr3	17987000	17988000	20000	4.30103	19	4.17621e-05	0.0180809	17968000	17969000	17987000	17988000	19	1	AT3G48500,AT3G48510	AT3G48530
Chr3	4109000	4110000	Chr3	4128000	4129000	20000	4.30103	23	2.01838e-06	0.00126838	4109000	4110000	4128000	4129000	23	1	AT3G12910	AT3G12930
Chr3	20620000	20621000	Chr3	20639000	20640000	20000	4.30103	16	1.30941e-05	0.00663264	20620000	20621000	20639000	20640000	16	1	AT3G55580,AT3G55590,AT3G55600	AT3G55630,AT3G55640
Chr3	4714000	4715000	Chr3	4733000	4734000	20000	4.30103	23	9.68919e-06	0.00510551	4714000	4715000	4733000	4734000	23	1	AT3G14200	AT3G14210,AT3G14220,AT3G14225
Chr4	8311000	8312000	Chr4	8330000	8331000	20000	4.30103	24	7.47188e-07	0.000522498	8309000	8313000	8330000	8335000	206	0.5	AT4G14455	AT4G14480
Chr4	734000	735000	Chr4	753000	754000	20000	4.30103	36	4.37815e-10	5.53793e-07	734000	738000	752000	754000	143	0.625	AT4G01700,AT4G01703	AT4G01740
Chr4	11406000	11407000	Chr4	11425000	11426000	20000	4.30103	23	1.11921e-09	1.32112e-06	11405000	11407000	11424000	11427000	79	0.666667	AT4G21410	AT4G21440,AT4G21445,AT4G21450
Chr4	16754000	16755000	Chr4	16773000	16774000	20000	4.30103	25	2.59397e-09	2.88541e-06	16754000	16755000	16772000	16774000	42	1	AT4G35220,AT4G35230	AT4G35250
Chr4	53000	54000	Chr4	72000	73000	20000	4.30103	19	1.30875e-07	0.000107194	53000	55000	72000	73000	34	1	AT4G00130,AT4G00140	AT4G00170,AT4G00180
Chr4	17708000	17709000	Chr4	17727000	17728000	20000	4.30103	18	1.25209e-06	0.000828057	17708000	17710000	17727000	17728000	33	1	AT4G37690	AT4G37740
Chr4	34000	35000	Chr4	53000	54000	20000	4.30103	17	1.96295e-06	0.00123644	34000	35000	53000	55000	32	1	AT4G00090	AT4G00130,AT4G00140
Chr4	17393000	17394000	Chr4	17412000	17413000	20000	4.30103	28	3.59636e-09	3.92297e-06	17393000	17394000	17412000	17413000	28	1	AT4G36910	NA
Chr4	1154000	1155000	Chr4	1173000	1174000	20000	4.30103	27	9.20822e-13	1.69782e-09	1154000	1155000	1173000	1174000	27	1	AT4G02640	AT4G02660
Chr4	13267000	13268000	Chr4	13286000	13287000	20000	4.30103	14	5.33148e-05	0.0223136	13267000	13268000	13286000	13287000	14	1	NA	AT4G26230,AT4G26240
Chr4	515000	516000	Chr4	534000	535000	20000	4.30103	21	4.12942e-06	0.00240471	515000	516000	534000	535000	21	1	AT4G01220	AT4G01270
Chr4	11581000	11582000	Chr4	11600000	11601000	20000	4.30103	21	2.03908e-06	0.00127952	11581000	11582000	11600000	11601000	21	1	AT4G21820	AT4G21860
Chr4	9984000	9985000	Chr4	10003000	10004000	20000	4.30103	18	5.28027e-07	0.000380634	9984000	9985000	10003000	10004000	18	1	AT4G17970,AT4G17975,AT4G17980,AT4G17990	AT4G18020
Chr4	1298000	1299000	Chr4	1317000	1318000	20000	4.30103	24	4.20856e-09	4.54108e-06	1298000	1299000	1317000	1318000	24	1	AT4G02930	AT4G02970
Chr4	9727000	9728000	Chr4	9746000	9747000	20000	4.30103	14	2.74435e-05	0.0125971	9727000	9728000	9746000	9747000	14	1	AT4G17440	AT4G17480
Chr4	13619000	13620000	Chr4	13638000	13639000	20000	4.30103	27	3.46405e-12	5.94574e-09	13619000	13620000	13638000	13639000	27	1	AT4G27170,AT4G27180,AT4G27190	AT4G27230
Chr4	12279000	12280000	Chr4	12298000	12299000	20000	4.30103	14	9.50879e-05	0.0365504	12279000	12280000	12298000	12299000	14	1	AT4G23520,AT4G23530,AT4G23540	AT4G23570,AT4G23580
Chr4	5727000	5728000	Chr4	5746000	5747000	20000	4.30103	21	3.48356e-05	0.0154727	5727000	5728000	5746000	5747000	21	1	AT4G08920	AT4G08960
Chr4	711000	712000	Chr4	730000	731000	20000	4.30103	17	5.26245e-08	4.64495e-05	711000	712000	730000	731000	17	1	AT4G01660,AT4G01670	AT4G01690
Chr4	6302000	6303000	Chr4	6321000	6322000	20000	4.30103	18	0.000130087	0.0473535	6302000	6303000	6321000	6322000	18	1	AT4G10080	AT4G10130
Chr4	14545000	14546000	Chr4	14564000	14565000	20000	4.30103	16	0.00012981	0.0472682	14545000	14546000	14564000	14565000	16	1	AT4G29700	AT4G29735,AT4G29740
Chr4	18240000	18241000	Chr4	18259000	18260000	20000	4.30103	15	8.5678e-05	0.033451	18240000	18241000	18259000	18260000	15	1	AT4G39160,AT4G39170	AT4G39210
Chr4	18313000	18314000	Chr4	18332000	18333000	20000	4.30103	15	7.29233e-05	0.0291384	18313000	18314000	18332000	18333000	15	1	AT4G39380	AT4G39410
Chr4	5167000	5168000	Chr4	5186000	5187000	20000	4.30103	21	1.74508e-07	0.000139581	5167000	5168000	5186000	5187000	21	1	AT4G08170	AT4G08210
Chr4	6649000	6650000	Chr4	6668000	6669000	20000	4.30103	12	0.000130587	0.0474956	6649000	6650000	6668000	6669000	12	1	AT4G10820	AT4G10850,AT4G10860
Chr4	7847000	7848000	Chr4	7866000	7867000	20000	4.30103	19	5.94692e-07	0.000424526	7847000	7848000	7866000	7867000	19	1	AT4G13493,AT4G13494	AT4G13530
Chr4	5730000	5731000	Chr4	5749000	5750000	20000	4.30103	21	3.24077e-07	0.000244904	5730000	5731000	5749000	5750000	21	1	AT4G08930,AT4G08940	AT4G08967
Chr4	10638000	10639000	Chr4	10657000	10658000	20000	4.30103	21	4.43579e-05	0.0190488	10638000	10639000	10657000	10658000	21	1	AT4G19510	AT4G19530,AT4G19540
Chr4	333000	334000	Chr4	352000	353000	20000	4.30103	14	1.19201e-05	0.00611768	333000	334000	352000	353000	14	1	AT4G00760,AT4G00770	AT4G00830
Chr4	17706000	17707000	Chr4	17725000	17726000	20000	4.30103	20	9.68002e-07	0.000659068	17706000	17707000	17725000	17726000	20	1	AT4G37685	AT4G37730,AT4G37740
Chr4	16451000	16452000	Chr4	16470000	16471000	20000	4.30103	11	9.65691e-05	0.0370228	16451000	16452000	16470000	16471000	11	1	AT4G34410	AT4G34440
Chr4	6457000	6458000	Chr4	6476000	6477000	20000	4.30103	14	3.31247e-05	0.0148062	6457000	6458000	6476000	6477000	14	1	AT4G10420,AT4G10430	AT4G10465,AT4G10470
Chr4	609000	610000	Chr4	628000	629000	20000	4.30103	12	5.89598e-05	0.0243252	609000	610000	628000	629000	12	1	AT4G01450	AT4G01480
Chr5	19167000	19168000	Chr5	19186000	19187000	20000	4.30103	28	4.4118e-06	0.00254816	19167000	19173000	19182000	19188000	348	0.388889	AT5G47200	AT5G47250
Chr5	17783000	17784000	Chr5	17802000	17803000	20000	4.30103	18	7.76589e-06	0.00419761	17782000	17784000	17800000	17803000	61	0.666667	AT5G44180	AT5G44200
Chr5	8694000	8695000	Chr5	8713000	8714000	20000	4.30103	19	8.54155e-09	8.72142e-06	8693000	8696000	8713000	8715000	71	0.666667	AT5G25170,AT5G25180	AT5G25200
Chr5	23211000	23212000	Chr5	23230000	23231000	20000	4.30103	33	6.36352e-15	1.54766e-11	23210000	23212000	23229000	23231000	66	0.75	AT5G57300,AT5G57310	AT5G57345,AT5G57350
Chr5	18971000	18972000	Chr5	18990000	18991000	20000	4.30103	49	1.0854e-21	5.64957e-18	18971000	18973000	18989000	18991000	101	0.75	AT5G46740,AT5G46750	AT5G46800,AT5G46810,AT5G46820
Chr5	5092000	5093000	Chr5	5111000	5112000	20000	4.30103	16	4.10415e-05	0.0178225	5092000	5093000	5110000	5112000	35	1	AT5G15650	AT5G15680
Chr5	7025000	7026000	Chr5	7044000	7045000	20000	4.30103	20	5.10491e-08	4.51256e-05	7025000	7026000	7044000	7046000	33	1	AT5G20736,AT5G20740	AT5G20810,AT5G20820
Chr5	9356000	9357000	Chr5	9375000	9376000	20000	4.30103	16	1.65242e-06	0.00105938	9356000	9358000	9375000	9376000	30	1	AT5G26640,AT5G26630,AT5G26622,AT5G26617	AT5G26620,AT5G26610
Chr5	9173000	9174000	Chr5	9192000	9193000	20000	4.30103	11	0.000136117	0.0492418	9173000	9174000	9192000	9193000	11	1	AT5G26230	AT5G26240
Chr5	26794000	26795000	Chr5	26813000	26814000	20000	4.30103	15	8.92033e-05	0.0346136	26794000	26795000	26813000	26814000	15	1	AT5G67140	AT5G67200
Chr5	21724000	21725000	Chr5	21743000	21744000	20000	4.30103	20	4.85946e-06	0.00277833	21724000	21725000	21743000	21744000	20	1	AT5G53490	AT5G53520
Chr5	18364000	18365000	Chr5	18383000	18384000	20000	4.30103	13	0.000123357	0.0452575	18364000	18365000	18383000	18384000	13	1	AT5G45330	AT5G45350
Chr5	25387000	25388000	Chr5	25406000	25407000	20000	4.30103	16	7.25701e-05	0.029016	25387000	25388000	25406000	25407000	16	1	AT5G63370,AT5G63380	AT5G63420,AT5G63440
Chr5	694000	695000	Chr5	713000	714000	20000	4.30103	20	8.35503e-07	0.000577349	694000	695000	713000	714000	20	1	AT5G02960,AT5G02970	NA
Chr5	713000	714000	Chr5	732000	733000	20000	4.30103	16	5.56275e-06	0.00313025	713000	714000	732000	733000	16	1	NA	NA
Chr5	5344000	5345000	Chr5	5363000	5364000	20000	4.30103	17	2.7658e-05	0.0126843	5344000	5345000	5363000	5364000	17	1	AT5G16310,AT5G16320	AT5G16390,AT5G16400
Chr5	17761000	17762000	Chr5	17780000	17781000	20000	4.30103	13	3.21211e-05	0.0144249	17761000	17762000	17780000	17781000	13	1	AT5G44130,AT5G44140	AT5G44160,AT5G44170
Chr5	19354000	19355000	Chr5	19373000	19374000	20000	4.30103	19	2.05565e-07	0.000161841	19354000	19355000	19373000	19374000	19	1	AT5G47800	AT5G47830
Chr5	26843000	26844000	Chr5	26862000	26863000	20000	4.30103	14	2.19478e-05	0.0103917	26843000	26844000	26862000	26863000	14	1	AT5G67280	AT5G67330
Chr5	6381000	6382000	Chr5	6400000	6401000	20000	4.30103	20	4.11175e-10	5.22817e-07	6381000	6382000	6400000	6401000	20	1	NA	NA
Chr5	4734000	4735000	Chr5	4753000	4754000	20000	4.30103	19	3.43093e-06	0.00203794	4734000	4735000	4753000	4754000	19	1	AT5G14690	AT5G14720,AT5G14730
Chr5	25035000	25036000	Chr5	25054000	25055000	20000	4.30103	16	6.76958e-06	0.00371722	25035000	25036000	25054000	25055000	16	1	NA	AT5G62390,AT5G62400,AT5G62410
Chr5	3516000	3517000	Chr5	3535000	3536000	20000	4.30103	19	2.55853e-06	0.00156901	3516000	3517000	3535000	3536000	19	1	AT5G11070	AT5G11100
Chr5	5897000	5898000	Chr5	5916000	5917000	20000	4.30103	15	6.08364e-07	0.00043353	5897000	5898000	5916000	5917000	15	1	AT5G17830,AT5G17840	AT5G17890
Chr5	15139000	15140000	Chr5	15158000	15159000	20000	4.30103	13	3.72569e-05	0.0164039	15139000	15140000	15158000	15159000	13	1	AT5G37980,AT5G37990,AT5G38000	AT5G38005,AT5G38010,AT5G38020
Chr5	931000	932000	Chr5	950000	951000	20000	4.30103	17	0.000130629	0.0475085	931000	932000	950000	951000	17	1	AT5G03640,AT5G03650	AT5G03670
Chr5	16760000	16761000	Chr5	16779000	16780000	20000	4.30103	19	9.9538e-06	0.00522688	16760000	16761000	16779000	16780000	19	1	AT5G41870,AT5G41880	AT5G41910,AT5G41920
Chr5	21609000	21610000	Chr5	21628000	21629000	20000	4.30103	22	2.65434e-08	2.48058e-05	21609000	21610000	21628000	21629000	22	1	AT5G53280	NA
Chr5	26515000	26516000	Chr5	26534000	26535000	20000	4.30103	17	0.000134107	0.0486075	26515000	26516000	26534000	26535000	17	1	AT5G66380,AT5G66390	AT5G66440,AT5G66450
Chr5	17066000	17067000	Chr5	17085000	17086000	20000	4.30103	16	7.96776e-05	0.0314111	17066000	17067000	17085000	17086000	16	1	AT5G42600,AT5G42610,AT5G42620	AT5G42640
Chr5	20132000	20133000	Chr5	20151000	20152000	20000	4.30103	16	1.2357e-05	0.00630945	20132000	20133000	20151000	20152000	16	1	AT5G49610,AT5G49615,AT5G49620	AT5G49640
Chr1	17253000	17254000	Chr1	17271000	17272000	19000	4.27875	31	1.09179e-10	1.5197e-07	17253000	17255000	17268000	17275000	195	0.642857	AT1G46554	AT1G46840
Chr1	10942000	10943000	Chr1	10960000	10961000	19000	4.27875	26	2.30794e-12	4.05629e-09	10942000	10944000	10959000	10964000	150	0.8	AT1G30810,AT1G30814	AT1G30825
Chr1	13123000	13124000	Chr1	13141000	13142000	19000	4.27875	18	1.04353e-11	1.6932e-08	13122000	13126000	13140000	13143000	105	0.583333	AT1G35580	NA
Chr1	13452000	13453000	Chr1	13470000	13471000	19000	4.27875	34	2.05703e-18	7.58734e-15	13450000	13456000	13470000	13471000	150	1	AT1G36050	AT1G36070
Chr1	16895000	16896000	Chr1	16913000	16914000	19000	4.27875	30	9.00915e-12	1.47039e-08	16895000	16897000	16911000	16914000	92	0.666667	AT1G44750	AT1G44790
Chr1	17034000	17035000	Chr1	17052000	17053000	19000	4.27875	15	1.8769e-05	0.00906093	17031000	17035000	17052000	17053000	65	1	AT1G45063	AT1G45100,AT1G45110
Chr1	12024000	12025000	Chr1	12042000	12043000	19000	4.27875	21	2.02176e-08	1.93072e-05	12024000	12025000	12042000	12044000	37	1	AT1G33140,AT1G33170	NA
Chr1	4096000	4097000	Chr1	4114000	4115000	19000	4.27875	28	4.18238e-08	3.75991e-05	4096000	4097000	4113000	4115000	53	1	NA	AT1G12110,AT1G12120
Chr1	5342000	5343000	Chr1	5360000	5361000	19000	4.27875	21	6.57838e-07	0.000465205	5342000	5343000	5359000	5361000	41	1	AT1G15540,AT1G15550	NA
Chr1	23882000	23883000	Chr1	23900000	23901000	19000	4.27875	18	3.58344e-08	3.26565e-05	23882000	23884000	23900000	23901000	42	1	AT1G64340,AT1G64350	AT1G64385
Chr1	17301000	17302000	Chr1	17319000	17320000	19000	4.27875	19	4.04572e-07	0.000299504	17301000	17302000	17319000	17320000	19	1	AT1G47210	AT1G47250
Chr1	6008000	6009000	Chr1	6026000	6027000	19000	4.27875	18	7.37171e-06	0.00400515	6008000	6009000	6026000	6027000	18	1	AT1G17480,AT1G17490	AT1G17520
Chr1	20150000	20151000	Chr1	20168000	20169000	19000	4.27875	20	2.86576e-05	0.0130734	20150000	20151000	20168000	20169000	20	1	AT1G53940,AT1G53950,AT1G53970,AT1G53980,AT1G53990	AT1G54030,AT1G54040
Chr1	26734000	26735000	Chr1	26752000	26753000	19000	4.27875	22	1.23843e-05	0.00632213	26734000	26735000	26752000	26753000	22	1	AT1G70890,AT1G70895,AT1G70900,AT1G70910	AT1G70944,AT1G70949,AT1G70950,AT1G70960
Chr1	23113000	23114000	Chr1	23131000	23132000	19000	4.27875	24	1.08752e-08	1.08995e-05	23113000	23114000	23131000	23132000	24	1	AT1G62440	AT1G62490,AT1G62500
Chr1	19295000	19296000	Chr1	19313000	19314000	19000	4.27875	28	3.08152e-08	2.84027e-05	19295000	19296000	19313000	19314000	28	1	AT1G51910,AT1G51913,AT1G51915,AT1G51920,AT1G51930,AT1G51940	AT1G51960,AT1G51965,AT1G51970,AT1G51980
Chr1	17966000	17967000	Chr1	17984000	17985000	19000	4.27875	13	2.38902e-05	0.0111766	17966000	17967000	17984000	17985000	13	1	AT1G48590,AT1G48598,AT1G48600	AT1G48635
Chr1	20630000	20631000	Chr1	20648000	20649000	19000	4.27875	16	8.05925e-05	0.0317203	20630000	20631000	20648000	20649000	16	1	AT1G55310	AT1G55325,AT1G55330
Chr1	11373000	11374000	Chr1	11391000	11392000	19000	4.27875	38	3.96428e-19	1.58476e-15	11373000	11374000	11391000	11392000	38	1	AT1G31760	AT1G31780
Chr1	22093000	22094000	Chr1	22111000	22112000	19000	4.27875	19	2.88128e-06	0.00174315	22093000	22094000	22111000	22112000	19	1	AT1G59990,AT1G60000	NA
Chr1	13054000	13055000	Chr1	13072000	13073000	19000	4.27875	12	3.74883e-05	0.016492	13054000	13055000	13072000	13073000	12	1	AT1G35467,AT1G35470	AT1G35510
Chr1	7451000	7452000	Chr1	7469000	7470000	19000	4.27875	15	0.000100178	0.0381354	7451000	7452000	7469000	7470000	15	1	AT1G21310	AT1G21326,AT1G21327,AT1G21340,AT1G21350
Chr1	424000	425000	Chr1	442000	443000	19000	4.27875	16	5.04968e-05	0.0212808	424000	425000	442000	443000	16	1	AT1G02205	AT1G02260,AT1G02270
Chr1	9814000	9815000	Chr1	9832000	9833000	19000	4.27875	15	1.81568e-06	0.00115255	9814000	9815000	9832000	9833000	15	1	AT1G28110,AT1G28120	AT1G28140
Chr1	10054000	10055000	Chr1	10072000	10073000	19000	4.27875	17	2.76674e-05	0.0126879	10054000	10055000	10072000	10073000	17	1	AT1G28570,AT1G28580,AT1G28590,AT1G28600,AT1G28610	AT1G28640,AT1G28650,AT1G28660
Chr1	12564000	12565000	Chr1	12582000	12583000	19000	4.27875	11	8.5159e-05	0.0332785	12564000	12565000	12582000	12583000	11	1	AT1G34400	AT1G34410,AT1G34418,AT1G34419
Chr1	26506000	26507000	Chr1	26524000	26525000	19000	4.27875	18	2.26651e-05	0.0106818	26506000	26507000	26524000	26525000	18	1	AT1G70340,AT1G70350,AT1G70360,AT1G70370	AT1G70380,AT1G70390,AT1G70400,AT1G70410
Chr1	8981000	8982000	Chr1	8999000	9000000	19000	4.27875	16	4.32862e-05	0.0186401	8981000	8982000	8999000	9000000	16	1	AT1G25560	AT1G25580
Chr1	11436000	11437000	Chr1	11454000	11455000	19000	4.27875	18	8.4001e-05	0.0328804	11436000	11437000	11454000	11455000	18	1	AT1G31860,AT1G31870	NA
Chr1	19761000	19762000	Chr1	19779000	19780000	19000	4.27875	22	1.24699e-06	0.000825031	19761000	19762000	19779000	19780000	22	1	AT1G53023,AT1G53025,AT1G53030,AT1G53035	AT1G53050,AT1G53060,AT1G53070
Chr1	21028000	21029000	Chr1	21046000	21047000	19000	4.27875	18	6.18816e-05	0.0253251	21028000	21029000	21046000	21047000	18	1	AT1G56180,AT1G56190	AT1G56230
Chr1	8003000	8004000	Chr1	8021000	8022000	19000	4.27875	25	5.78898e-07	0.000414164	8003000	8004000	8021000	8022000	25	1	AT1G22620,AT1G22630,AT1G22640	AT1G22660,AT1G22670
Chr1	8112000	8113000	Chr1	8130000	8131000	19000	4.27875	21	1.68374e-05	0.00824777	8112000	8113000	8130000	8131000	21	1	AT1G22920	AT1G22960,AT1G22970
Chr1	19571000	19572000	Chr1	19589000	19590000	19000	4.27875	24	1.83823e-08	1.76936e-05	19571000	19572000	19589000	19590000	24	1	AT1G52540	AT1G52570,AT1G52580,AT1G52590
Chr1	21311000	21312000	Chr1	21329000	21330000	19000	4.27875	24	1.09447e-05	0.00567972	21311000	21312000	21329000	21330000	24	1	AT1G57540,AT1G57550	AT1G57580,AT1G57590
Chr1	20004000	20005000	Chr1	20022000	20023000	19000	4.27875	15	3.23348e-05	0.01451	20004000	20005000	20022000	20023000	15	1	AT1G53600,AT1G53610,AT1G53620	AT1G53625,AT1G53633,AT1G53635,AT1G53640
Chr1	5629000	5630000	Chr1	5647000	5648000	19000	4.27875	15	1.04117e-05	0.00543816	5629000	5630000	5647000	5648000	15	1	AT1G16470,AT1G16480,AT1G16489,AT1G16490	AT1G16515,AT1G16520,AT1G16530
Chr1	20227000	20228000	Chr1	20245000	20246000	19000	4.27875	26	1.26086e-10	1.73577e-07	20227000	20228000	20245000	20246000	26	1	AT1G54170,AT1G54180	AT1G54217
Chr1	11295000	11296000	Chr1	11313000	11314000	19000	4.27875	20	6.00301e-07	0.000428294	11295000	11296000	11313000	11314000	20	1	AT1G31550	AT1G31600,AT1G31620,AT1G31630
Chr1	26363000	26364000	Chr1	26381000	26382000	19000	4.27875	19	5.91397e-05	0.0243878	26363000	26364000	26381000	26382000	19	1	AT1G70000	AT1G70040,AT1G70050
Chr1	4776000	4777000	Chr1	4794000	4795000	19000	4.27875	20	0.000125716	0.0460059	4776000	4777000	4794000	4795000	20	1	AT1G13960	AT1G13980,AT1G13990
Chr1	23274000	23275000	Chr1	23292000	23293000	19000	4.27875	26	8.15984e-06	0.00438858	23274000	23275000	23292000	23293000	26	1	AT1G62820,AT1G62830,AT1G62840,AT1G62850	AT1G62870,AT1G62880,AT1G62886
Chr2	11678000	11679000	Chr2	11696000	11697000	19000	4.27875	30	3.16875e-12	5.46906e-09	11678000	11679000	11692000	11698000	148	1	AT2G27285,AT2G27290,AT2G27300,AT2G27310	AT2G27330,AT2G27340
Chr2	8880000	8881000	Chr2	8898000	8899000	19000	4.27875	19	1.1476e-05	0.00592184	8880000	8881000	8897000	8900000	58	1	AT2G20605,AT2G20610,AT2G20613,AT2G20616,AT2G20618	AT2G20619,AT2G20620,AT2G20625,AT2G20630
Chr2	7108000	7109000	Chr2	7126000	7127000	19000	4.27875	21	4.56007e-06	0.00262638	7108000	7109000	7125000	7127000	42	1	AT2G16405	AT2G16440
Chr2	17331000	17332000	Chr2	17349000	17350000	19000	4.27875	18	1.81259e-08	1.74817e-05	17331000	17333000	17349000	17350000	44	1	AT2G41550	AT2G41620,AT2G41616
Chr2	8541000	8542000	Chr2	8559000	8560000	19000	4.27875	21	3.4063e-07	0.00025592	8541000	8542000	8559000	8560000	21	1	NA	AT2G19830
Chr2	6371000	6372000	Chr2	6389000	6390000	19000	4.27875	9	0.000104619	0.0395338	6371000	6372000	6389000	6390000	9	1	AT2G14835	AT2G14860,AT2G14870
Chr2	18953000	18954000	Chr2	18971000	18972000	19000	4.27875	20	1.37912e-06	0.000901784	18953000	18954000	18971000	18972000	20	1	AT2G46090,AT2G46100	AT2G46180,AT2G46190
Chr2	11746000	11747000	Chr2	11764000	11765000	19000	4.27875	40	8.06371e-15	1.94292e-11	11746000	11747000	11764000	11765000	40	1	AT2G27470,AT2G27480	AT2G27530,AT2G27535,AT2G27540
Chr2	17477000	17478000	Chr2	17495000	17496000	19000	4.27875	20	9.85524e-05	0.037638	17477000	17478000	17495000	17496000	20	1	AT2G41880	AT2G41905,AT2G41910
Chr2	6814000	6815000	Chr2	6832000	6833000	19000	4.27875	12	0.000127804	0.0466623	6814000	6815000	6832000	6833000	12	1	AT2G15630	AT2G15690
Chr2	10684000	10685000	Chr2	10702000	10703000	19000	4.27875	24	4.27729e-07	0.000315207	10684000	10685000	10702000	10703000	24	1	AT2G25100,AT2G25110	AT2G25130,AT2G25140,AT2G25150
Chr2	2436000	2437000	Chr2	2454000	2455000	19000	4.27875	14	2.64088e-07	0.000203708	2436000	2437000	2454000	2455000	14	1	AT2G06210	NA
Chr2	19209000	19210000	Chr2	19227000	19228000	19000	4.27875	18	1.25322e-07	0.000102994	19209000	19210000	19227000	19228000	18	1	AT2G46735,AT2G46740,AT2G46750	AT2G46770
Chr2	8461000	8462000	Chr2	8479000	8480000	19000	4.27875	19	2.07833e-05	0.00991155	8461000	8462000	8479000	8480000	19	1	AT2G19510,AT2G19520,AT2G19530,AT2G19540	AT2G19590,AT2G19600
Chr2	8169000	8170000	Chr2	8187000	8188000	19000	4.27875	20	0.000104437	0.0394918	8169000	8170000	8187000	8188000	20	1	AT2G18870,AT2G18876,AT2G18880	AT2G18890,AT2G18900
Chr2	2216000	2217000	Chr2	2234000	2235000	19000	4.27875	16	7.80021e-05	0.030857	2216000	2217000	2234000	2235000	16	1	AT2G05810,AT2G05812	AT2G05840
Chr2	5753000	5754000	Chr2	5771000	5772000	19000	4.27875	14	4.14004e-06	0.00240947	5753000	5754000	5771000	5772000	14	1	AT2G13800	AT2G13810
Chr2	5959000	5960000	Chr2	5977000	5978000	19000	4.27875	19	4.42397e-05	0.0190054	5959000	5960000	5977000	5978000	19	1	AT2G14120	AT2G14160,AT2G14170
Chr2	15370000	15371000	Chr2	15388000	15389000	19000	4.27875	20	2.33123e-05	0.0109484	15370000	15371000	15388000	15389000	20	1	AT2G36680	AT2G36710
Chr2	19089000	19090000	Chr2	19107000	19108000	19000	4.27875	23	7.10587e-07	0.000499102	19089000	19090000	19107000	19108000	23	1	AT2G46500,AT2G46505	AT2G46530
Chr2	6934000	6935000	Chr2	6952000	6953000	19000	4.27875	12	4.8759e-05	0.0206638	6934000	6935000	6952000	6953000	12	1	AT2G15910	AT2G15980
Chr2	295000	296000	Chr2	313000	314000	19000	4.27875	21	4.93917e-05	0.02089	295000	296000	313000	314000	21	1	AT2G01667	AT2G01690
Chr2	7575000	7576000	Chr2	7593000	7594000	19000	4.27875	18	1.42281e-06	0.000927468	7575000	7576000	7593000	7594000	18	1	AT2G17440,AT2G17442	AT2G17480
Chr2	18077000	18078000	Chr2	18095000	18096000	19000	4.27875	21	7.77715e-06	0.00420281	18077000	18078000	18095000	18096000	21	1	AT2G43530,AT2G43535,AT2G43540,AT2G43550,AT2G43560,AT2G43570,AT2G43580	AT2G43620,AT2G43630
Chr2	13421000	13422000	Chr2	13439000	13440000	19000	4.27875	18	1.84768e-05	0.00894152	13421000	13422000	13439000	13440000	18	1	AT2G31510	AT2G31570
Chr2	918000	919000	Chr2	936000	937000	19000	4.27875	14	5.266e-06	0.00298194	918000	919000	936000	937000	14	1	AT2G03090	AT2G03110
Chr2	13361000	13362000	Chr2	13379000	13380000	19000	4.27875	21	1.43779e-06	0.000936138	13361000	13362000	13379000	13380000	21	1	AT2G31320,AT2G31335,AT2G31340	AT2G31370
Chr2	11799000	11800000	Chr2	11817000	11818000	19000	4.27875	20	4.10121e-07	0.000303035	11799000	11800000	11817000	11818000	20	1	AT2G27650,AT2G27660	AT2G27710
Chr2	9047000	9048000	Chr2	9065000	9066000	19000	4.27875	17	4.23634e-05	0.0183025	9047000	9048000	9065000	9066000	17	1	AT2G21090,AT2G21100	AT2G21140,AT2G21150
Chr3	9719000	9720000	Chr3	9737000	9738000	19000	4.27875	29	1.6511e-09	1.89601e-06	9719000	9724000	9736000	9742000	581	0.766667	NA	NA
Chr3	10934000	10935000	Chr3	10952000	10953000	19000	4.27875	26	1.93303e-11	3.01081e-08	10934000	10936000	10951000	10953000	90	1	AT3G28918	NA
Chr3	11511000	11512000	Chr3	11529000	11530000	19000	4.27875	14	1.38172e-06	0.000903409	11511000	11512000	11528000	11532000	46	1	NA	AT3G29670
Chr3	16932000	16933000	Chr3	16950000	16951000	19000	4.27875	22	1.04709e-06	0.000706728	16931000	16934000	16949000	16951000	71	0.666667	AT3G46110	AT3G46140,AT3G46150,AT3G46160,AT3G46170
Chr3	15953000	15954000	Chr3	15971000	15972000	19000	4.27875	35	8.58948e-15	2.06258e-11	15952000	15954000	15971000	15973000	71	0.75	AT3G44260,AT3G44261	AT3G44280
Chr3	20790000	20791000	Chr3	20808000	20809000	19000	4.27875	20	1.20569e-05	0.00617813	20790000	20793000	20807000	20809000	49	0.5	AT3G56020	AT3G56060,AT3G56070
Chr3	6337000	6338000	Chr3	6355000	6356000	19000	4.27875	22	7.5733e-08	6.48514e-05	6336000	6338000	6355000	6356000	39	1	AT3G18480	AT3G18500,AT3G18510,AT3G18518
Chr3	10192000	10193000	Chr3	10210000	10211000	19000	4.27875	30	1.63141e-09	1.87534e-06	10192000	10194000	10210000	10211000	46	1	AT3G27500,AT3G27503,AT3G27510,AT3G27520	AT3G27555,AT3G27560
Chr3	3420000	3421000	Chr3	3438000	3439000	19000	4.27875	31	2.25034e-08	2.12705e-05	3419000	3421000	3438000	3439000	56	1	AT3G10930	AT3G10980
Chr3	3110000	3111000	Chr3	3128000	3129000	19000	4.27875	16	1.45698e-08	1.42928e-05	3110000	3111000	3128000	3129000	16	1	AT3G10090	AT3G10116
Chr3	17547000	17548000	Chr3	17565000	17566000	19000	4.27875	26	1.82082e-05	0.00882255	17547000	17548000	17565000	17566000	26	1	NA	AT3G47630
Chr3	8708000	8709000	Chr3	8726000	8727000	19000	4.27875	17	4.04173e-05	0.0175907	8708000	8709000	8726000	8727000	17	1	AT3G24120,AT3G24130	AT3G24150,AT3G24160
Chr3	7445000	7446000	Chr3	7463000	7464000	19000	4.27875	16	2.61208e-05	0.0120619	7445000	7446000	7463000	7464000	16	1	AT3G21215,AT3G21220	AT3G21250
Chr3	18656000	18657000	Chr3	18674000	18675000	19000	4.27875	24	1.15649e-07	9.559e-05	18656000	18657000	18674000	18675000	24	1	AT3G50320,AT3G50330	AT3G50350,AT3G50360
Chr3	11979000	11980000	Chr3	11997000	11998000	19000	4.27875	17	1.10892e-05	0.00574741	11979000	11980000	11997000	11998000	17	1	AT3G30390,AT3G30383	AT3G30385,AT3G30387,AT3G30391
Chr3	9274000	9275000	Chr3	9292000	9293000	19000	4.27875	22	3.8852e-07	0.000288743	9274000	9275000	9292000	9293000	22	1	AT3G25540	AT3G25570,AT3G25572,AT3G25573,AT3G25577,AT3G25580
Chr3	20284000	20285000	Chr3	20302000	20303000	19000	4.27875	11	9.13721e-05	0.035337	20284000	20285000	20302000	20303000	11	1	AT3G54790	AT3G54820
Chr3	7691000	7692000	Chr3	7709000	7710000	19000	4.27875	17	2.54084e-05	0.0117889	7691000	7692000	7709000	7710000	17	1	AT3G21820,AT3G21830,AT3G21840	AT3G21880,AT3G21890
Chr3	3418000	3419000	Chr3	3436000	3437000	19000	4.27875	20	4.29069e-05	0.0185046	3418000	3419000	3436000	3437000	20	1	AT3G10915,AT3G10920	AT3G10970,AT3G10974
Chr3	22319000	22320000	Chr3	22337000	22338000	19000	4.27875	16	6.15461e-05	0.0252077	22319000	22320000	22337000	22338000	16	1	AT3G60380	AT3G60420,AT3G60440,AT3G60450
Chr3	6477000	6478000	Chr3	6495000	6496000	19000	4.27875	15	0.00011177	0.0417413	6477000	6478000	6495000	6496000	15	1	AT3G18779,AT3G18780,AT3G18790	AT3G18840
Chr3	8918000	8919000	Chr3	8936000	8937000	19000	4.27875	27	2.72296e-09	3.02114e-06	8918000	8919000	8936000	8937000	27	1	AT3G24495,AT3G24500	AT3G24515,AT3G24516,AT3G24517
Chr3	10290000	10291000	Chr3	10308000	10309000	19000	4.27875	13	0.000118851	0.0439068	10290000	10291000	10308000	10309000	13	1	AT3G27785	AT3G27809,AT3G27810
Chr3	6773000	6774000	Chr3	6791000	6792000	19000	4.27875	16	8.00985e-06	0.00431477	6773000	6774000	6791000	6792000	16	1	AT3G19510,AT3G19515,AT3G19520,AT3G19530	AT3G19550,AT3G19553
Chr3	20193000	20194000	Chr3	20211000	20212000	19000	4.27875	14	3.99481e-05	0.0174139	20193000	20194000	20211000	20212000	14	1	AT3G54550,AT3G54560,AT3G54570,AT3G54580	AT3G54590,AT3G54600
Chr3	4540000	4541000	Chr3	4558000	4559000	19000	4.27875	16	0.000115688	0.0429158	4540000	4541000	4558000	4559000	16	1	AT3G13800	AT3G13830,AT3G13840,AT3G13845
Chr3	21773000	21774000	Chr3	21791000	21792000	19000	4.27875	18	9.73881e-05	0.0372743	21773000	21774000	21791000	21792000	18	1	AT3G58900,AT3G58910	AT3G58970
Chr3	2807000	2808000	Chr3	2825000	2826000	19000	4.27875	16	2.21232e-05	0.0104622	2807000	2808000	2825000	2826000	16	1	AT3G09160,AT3G09162	AT3G09200,AT3G09210,AT3G09220
Chr4	2591000	2592000	Chr4	2609000	2610000	19000	4.27875	26	6.35986e-12	1.05821e-08	2589000	2596000	2608000	2612000	214	0.392857	AT4G05060	AT4G05080,AT4G05090
Chr4	6902000	6903000	Chr4	6920000	6921000	19000	4.27875	16	8.09284e-05	0.0318316	6902000	6909000	6920000	6922000	168	0.642857	AT4G11350	AT4G11380
Chr4	11860000	11861000	Chr4	11878000	11879000	19000	4.27875	33	1.19889e-13	2.47459e-10	11859000	11862000	11878000	11880000	127	0.833333	AT4G22530,AT4G22540	AT4G22550
Chr4	13009000	13010000	Chr4	13027000	13028000	19000	4.27875	48	2.11903e-23	1.3035e-19	13008000	13010000	13026000	13028000	99	1	AT4G25440,AT4G25450	AT4G25500,AT4G25510
Chr4	14383000	14384000	Chr4	14401000	14402000	19000	4.27875	24	1.04443e-06	0.000705237	14383000	14385000	14400000	14402000	66	0.75	AT4G29170	AT4G29210
Chr4	1941000	1942000	Chr4	1959000	1960000	19000	4.27875	14	5.52223e-05	0.0229869	1941000	1943000	1959000	1961000	41	0.75	AT4G04040	NA
Chr4	17230000	17231000	Chr4	17248000	17249000	19000	4.27875	20	1.19256e-06	0.000793479	17229000	17231000	17248000	17249000	39	1	AT4G36515,AT4G36520	AT4G36550
Chr4	7849000	7850000	Chr4	7867000	7868000	19000	4.27875	27	6.24821e-09	6.54568e-06	7849000	7850000	7866000	7868000	51	1	NA	AT4G13530
Chr4	2525000	2526000	Chr4	2543000	2544000	19000	4.27875	38	2.13017e-13	4.26767e-10	2524000	2526000	2543000	2544000	59	1	AT4G04955,AT4G04957	AT4G04970,AT4G04972,AT4G04980,AT4G04985
Chr4	15054000	15055000	Chr4	15072000	15073000	19000	4.27875	28	6.99953e-09	7.2662e-06	15054000	15056000	15072000	15073000	51	1	AT4G30935,AT4G30940	AT4G30970,AT4G30972,AT4G30975,AT4G30980
Chr4	17511000	17512000	Chr4	17529000	17530000	19000	4.27875	21	6.53071e-08	5.64897e-05	17511000	17512000	17529000	17530000	21	1	AT4G37200	AT4G37250
Chr4	1280000	1281000	Chr4	1298000	1299000	19000	4.27875	17	9.43428e-06	0.00498809	1280000	1281000	1298000	1299000	17	1	AT4G02890	AT4G02930
Chr4	7024000	7025000	Chr4	7042000	7043000	19000	4.27875	20	3.97993e-06	0.00232725	7024000	7025000	7042000	7043000	20	1	AT4G11640,AT4G11650	AT4G11660
Chr4	921000	922000	Chr4	939000	940000	19000	4.27875	11	2.27834e-05	0.0107318	921000	922000	939000	940000	11	1	AT4G02080	AT4G02110
Chr4	7053000	7054000	Chr4	7071000	7072000	19000	4.27875	15	8.05488e-05	0.0317063	7053000	7054000	7071000	7072000	15	1	AT4G11670,AT4G11680	AT4G11720,AT4G11730,AT4G11740
Chr4	9434000	9435000	Chr4	9452000	9453000	19000	4.27875	31	9.15406e-14	1.92005e-10	9434000	9435000	9452000	9453000	31	1	AT4G16770	AT4G16790
Chr4	7809000	7810000	Chr4	7827000	7828000	19000	4.27875	12	4.95296e-05	0.0209329	7809000	7810000	7827000	7828000	12	1	AT4G13440,AT4G13445,AT4G13450	AT4G13460
Chr4	10393000	10394000	Chr4	10411000	10412000	19000	4.27875	25	4.59098e-09	4.91416e-06	10393000	10394000	10411000	10412000	25	1	AT4G18975	AT4G19006,AT4G19010,AT4G19020,AT4G19030
Chr4	13803000	13804000	Chr4	13821000	13822000	19000	4.27875	13	8.50076e-06	0.00454959	13803000	13804000	13821000	13822000	13	1	AT4G27640,AT4G27650	AT4G27680
Chr4	1293000	1294000	Chr4	1311000	1312000	19000	4.27875	11	5.37715e-06	0.00303802	1293000	1294000	1311000	1312000	11	1	AT4G02920	AT4G02950
Chr4	624000	625000	Chr4	642000	643000	19000	4.27875	10	7.41842e-05	0.029589	624000	625000	642000	643000	10	1	AT4G01470	AT4G01510,AT4G01516
Chr4	17788000	17789000	Chr4	17806000	17807000	19000	4.27875	20	4.82755e-06	0.00276243	17788000	17789000	17806000	17807000	20	1	AT4G37830,AT4G37840	AT4G37870
Chr4	5299000	5300000	Chr4	5317000	5318000	19000	4.27875	18	8.98109e-06	0.0047699	5299000	5300000	5317000	5318000	18	1	AT4G08370	AT4G08390,AT4G08395,AT4G08400
Chr4	10832000	10833000	Chr4	10850000	10851000	19000	4.27875	28	3.71351e-10	4.76074e-07	10832000	10833000	10850000	10851000	28	1	AT4G19980,AT4G19985,AT4G19990	AT4G20050
Chr4	11511000	11512000	Chr4	11529000	11530000	19000	4.27875	19	2.75001e-06	0.00167167	11511000	11512000	11529000	11530000	19	1	AT4G21650,AT4G21660,AT4G21670	AT4G21690,AT4G21700
Chr4	5974000	5975000	Chr4	5992000	5993000	19000	4.27875	11	0.000130672	0.0475198	5974000	5975000	5992000	5993000	11	1	AT4G09430,AT4G09432	AT4G09460
Chr4	8167000	8168000	Chr4	8185000	8186000	19000	4.27875	21	2.62252e-06	0.00160433	8167000	8168000	8185000	8186000	21	1	AT4G14160	AT4G14190,AT4G14200
Chr4	14863000	14864000	Chr4	14881000	14882000	19000	4.27875	17	1.68428e-05	0.00824978	14863000	14864000	14881000	14882000	17	1	AT4G30390	AT4G30440
Chr4	10277000	10278000	Chr4	10295000	10296000	19000	4.27875	19	1.20999e-06	0.000803085	10277000	10278000	10295000	10296000	19	1	AT4G18660,AT4G18670	NA
Chr4	9746000	9747000	Chr4	9764000	9765000	19000	4.27875	17	8.18881e-06	0.00440172	9746000	9747000	9764000	9765000	17	1	AT4G17480	AT4G17505
Chr4	9411000	9412000	Chr4	9429000	9430000	19000	4.27875	10	2.66136e-05	0.0122618	9411000	9412000	9429000	9430000	10	1	AT4G16740,AT4G16745	AT4G16765
Chr4	12571000	12572000	Chr4	12589000	12590000	19000	4.27875	20	2.41332e-06	0.00148959	12571000	12572000	12589000	12590000	20	1	AT4G24240	AT4G24275,AT4G24280
Chr4	11098000	11099000	Chr4	11116000	11117000	19000	4.27875	13	4.19024e-05	0.0181326	11098000	11099000	11116000	11117000	13	1	AT4G20640,AT4G20650,AT4G20670,AT4G20680,AT4G20690,AT4G20700	NA
Chr4	17130000	17131000	Chr4	17148000	17149000	19000	4.27875	13	4.31736e-05	0.0185978	17130000	17131000	17148000	17149000	13	1	AT4G36195,AT4G36197,AT4G36210	AT4G36240
Chr5	8759000	8760000	Chr5	8777000	8778000	19000	4.27875	19	2.20101e-07	0.000172343	8759000	8765000	8776000	8780000	380	0.666667	AT5G25270	NA
Chr5	8757000	8758000	Chr5	8775000	8776000	19000	4.27875	17	6.97947e-05	0.0280744	8754000	8758000	8775000	8782000	261	0.392857	AT5G25270	AT5G25280
Chr5	17593000	17594000	Chr5	17611000	17612000	19000	4.27875	20	2.73531e-11	4.17838e-08	17592000	17596000	17611000	17613000	87	0.75	AT5G43790	AT5G43810
Chr5	19356000	19357000	Chr5	19374000	19375000	19000	4.27875	24	1.65723e-06	0.00106229	19356000	19358000	19374000	19376000	82	1	AT5G47800,AT5G47810	AT5G47830
Chr5	1259000	1260000	Chr5	1277000	1278000	19000	4.27875	19	2.19898e-05	0.0104084	1259000	1261000	1276000	1278000	59	0.75	AT5G04460	AT5G04480
Chr5	342000	343000	Chr5	360000	361000	19000	4.27875	12	0.000109522	0.0410714	342000	344000	360000	361000	29	1	AT5G01890	AT5G01920,AT5G01930
Chr5	14572000	14573000	Chr5	14590000	14591000	19000	4.27875	34	3.22908e-22	1.77061e-18	14572000	14574000	14590000	14591000	45	1	AT5G36930	AT5G36940
Chr5	20805000	20806000	Chr5	20823000	20824000	19000	4.27875	16	2.46795e-07	0.000191394	20804000	20806000	20823000	20824000	31	1	AT5G51195,AT5G51200	AT5G51220,AT5G51230
Chr5	25423000	25424000	Chr5	25441000	25442000	19000	4.27875	17	1.11969e-05	0.00579783	25423000	25424000	25440000	25442000	30	1	AT5G63500,AT5G63510	AT5G63540
Chr5	1221000	1222000	Chr5	1239000	1240000	19000	4.27875	19	4.5034e-05	0.0192902	1221000	1222000	1239000	1241000	36	1	AT5G04347,AT5G04350,AT5G04360	AT5G04370,AT5G04380,AT5G04386,AT5G04390
Chr5	26000	27000	Chr5	44000	45000	19000	4.27875	19	1.2059e-07	9.9367e-05	26000	28000	44000	45000	33	1	AT5G01070,AT5G01075	AT5G01110,AT5G01120,AT5G01130
Chr5	14048000	14049000	Chr5	14066000	14067000	19000	4.27875	12	4.61221e-05	0.0196944	14047000	14049000	14066000	14067000	25	1	AT5G35917	AT5G35930
Chr5	1697000	1698000	Chr5	1715000	1716000	19000	4.27875	21	3.83381e-07	0.000285174	1697000	1699000	1715000	1716000	38	1	AT5G05670	AT5G05700,AT5G05710
Chr5	16004000	16005000	Chr5	16022000	16023000	19000	4.27875	24	2.47486e-06	0.00152311	16004000	16005000	16022000	16023000	24	1	AT5G39970,AT5G39980,AT5G39990	AT5G40010,AT5G40020
Chr5	21567000	21568000	Chr5	21585000	21586000	19000	4.27875	14	2.45017e-05	0.0114235	21567000	21568000	21585000	21586000	14	1	AT5G53170	AT5G53205,AT5G53210
Chr5	25237000	25238000	Chr5	25255000	25256000	19000	4.27875	18	8.49984e-05	0.0332257	25237000	25238000	25255000	25256000	18	1	AT5G62880	AT5G62930
Chr5	3477000	3478000	Chr5	3495000	3496000	19000	4.27875	17	9.44738e-07	0.000645263	3477000	3478000	3495000	3496000	17	1	AT5G10990	AT5G11030,AT5G11040
Chr5	16801000	16802000	Chr5	16819000	16820000	19000	4.27875	18	1.07265e-05	0.00557912	16801000	16802000	16819000	16820000	18	1	AT5G42000,AT5G42010	AT5G42060,AT5G42070
Chr5	9676000	9677000	Chr5	9694000	9695000	19000	4.27875	15	2.25157e-05	0.010623	9676000	9677000	9694000	9695000	15	1	AT5G27390,AT5G27400,AT5G27410	AT5G27460,AT5G27470,AT5G27490
Chr5	2028000	2029000	Chr5	2046000	2047000	19000	4.27875	16	4.08191e-05	0.0177418	2028000	2029000	2046000	2047000	16	1	NA	AT5G06660
Chr5	22804000	22805000	Chr5	22822000	22823000	19000	4.27875	18	8.49848e-05	0.0332221	22804000	22805000	22822000	22823000	18	1	AT5G56310	AT5G56350
Chr5	8000	9000	Chr5	26000	27000	19000	4.27875	19	1.00735e-07	8.42564e-05	8000	9000	26000	27000	19	1	AT5G01020	AT5G01070,AT5G01075
Chr5	7222000	7223000	Chr5	7240000	7241000	19000	4.27875	19	1.29726e-05	0.00658137	7222000	7223000	7240000	7241000	19	1	AT5G21326,AT5G21378,AT5G21430	AT5G21900,AT5G21910
Chr5	15261000	15262000	Chr5	15279000	15280000	19000	4.27875	17	1.03332e-06	0.000698464	15261000	15262000	15279000	15280000	17	1	AT5G38210	AT5G38240,AT5G38250,AT5G38260
Chr5	8590000	8591000	Chr5	8608000	8609000	19000	4.27875	18	9.63318e-08	8.08521e-05	8590000	8591000	8608000	8609000	18	1	AT5G24930,AT5G24940,AT5G24950	AT5G24960,AT5G24970
Chr5	26850000	26851000	Chr5	26868000	26869000	19000	4.27875	14	4.3552e-05	0.0187421	26850000	26851000	26868000	26869000	14	1	NA	AT5G67350
Chr5	24057000	24058000	Chr5	24075000	24076000	19000	4.27875	22	2.67937e-06	0.00163422	24057000	24058000	24075000	24076000	22	1	AT5G59710	AT5G59750,AT5G59760
Chr5	18093000	18094000	Chr5	18111000	18112000	19000	4.27875	14	1.35032e-05	0.00680531	18093000	18094000	18111000	18112000	14	1	AT5G44800	AT5G44860
[truncated: 14,245 more rows]
