# Supplementary material for: Polycomb-dependent differential chromatin compartmentalization determines gene coregulation in Arabidopsis
Source: HighWire-hosted journal article supplement (doi:10.1101/gr.273771.120), 2021-06-03
Supplement: Supplemental_Table_S3.xlsx [file Supplemental_Table_S3.xlsx]

## Sheet: S3
Supplementary Table S3: Genes spanning H3K9ac loops_FithiChIP
AT3G29830
AT3G06420
AT3G06430
AT3G06370
AT3G06380
AT3G06450
AT3G06440
AT3G42140
AT3G42148
AT3G42150
AT3G42155
AT2G09990
AT5G32450
AT5G32460
AT1G41880
AT1G36370
AT2G06530
AT2G06541
AT5G29000
AT2G09795
AT1G41875
AT5G28610
AT5G28615
AT5G28620
AT4G03630
AT4G03635
AT2G10535
AT2G10537
AT5G34828
AT5G28720
AT5G28730
AT5G28740
AT3G30725
AT3G30730
AT5G30495
AT2G06050
AT2G06090
AT2G09970
AT3G33520
AT3G42790
AT2G11520
AT4G06634
AT3G60820
AT1G42550
AT1G42540
AT1G42560
AT4G03960
AT1G36990
AT1G36992
AT1G37000
AT1G37007
AT1G37010
AT3G30778
AT2G11270
AT2G11271
AT5G34905
AT5G34908
AT5G34930
AT1G36730
AT1G36732
AT4G06744
AT4G06746
AT3G30768
AT3G30769
AT3G30770
AT3G30775
AT3G60870
AT3G60880
AT4G03827
AT3G60900
AT2G14282
AT2G14285
AT4G06598
AT3G60500
AT4G06599
AT2G10950
AT2G10965
AT3G29575
AT3G43110
AT3G43120
AT2G03980
AT5G28540
AT1G36070
AT1G33800
AT1G33810
AT1G33811
AT2G11890
AT1G34844
AT2G13125
AT2G13126
AT4G05540
AT4G05553
AT5G28919
AT5G28920
AT2G16600
AT2G16620
AT2G11910
AT3G29400
AT3G29410
AT1G35910
AT3G60850
AT3G60860
AT1G43005
AT1G43010
AT1G43020
AT1G43130
AT4G04220
AT5G25170
AT2G06850
AT1G47885
AT1G47890
AT2G03890
AT3G42940
AT3G42950
AT5G28750
AT2G07180
AT2G07190
AT2G07200
AT3G60940
AT3G28900
AT3G21865
AT3G21870
AT2G02550
AT2G02560
AT1G35320
AT2G11000
AT2G11005
AT4G08210
AT1G65630
AT1G65640
AT1G65650
AT3G60960
AT4G07940
AT4G07950
AT3G46320
AT3G46330
AT3G46340
AT2G04930
AT2G04925
AT2G19730
AT2G19740
AT3G61320
AT1G61180
AT2G12461
AT2G12462
AT2G03913
AT2G03930
AT3G43580
AT3G25700
AT5G28060
AT1G36622
AT4G12840
AT4G12850
AT4G12860
AT5G28850
AT3G43400
AT3G43402
AT3G43410
AT5G35080
AT1G36095
AT1G36100
AT3G28940
AT2G04940
AT3G22100
AT4G04077
AT4G04078
AT4G04080
AT4G04090
AT5G35090
AT5G33290
AT2G11810
AT2G07050
AT2G14120
AT2G05630
AT2G05632
AT2G05635
AT3G44280
AT5G35100
AT5G39090
AT5G39100
AT2G05810
AT2G05812
AT1G35710
AT4G03940
AT4G20170
AT4G20190
AT4G20200
AT4G05150
AT1G35365
AT3G44220
AT3G44230
AT3G44235
AT4G19220
AT5G45070
AT5G38195
AT5G38197
AT2G15020
AT4G08620
AT4G08630
AT4G12250
AT5G28040
AT5G03940
AT5G03944
AT2G28320
AT2G28330
AT5G24735
AT5G24740
AT5G36890
AT1G47620
AT1G47640
AT1G47870
AT1G35720
AT1G35730
AT1G44790
AT3G16350
AT4G29120
AT5G25110
AT1G61190
AT1G34630
AT2G05070
AT2G19850
AT2G19860
AT3G29075
AT4G15955
AT4G15960
AT1G43900
AT3G43430
AT3G43431
AT3G43600
AT3G43610
AT3G29185
AT4G09320
AT5G03590
AT5G03600
AT5G03610
AT1G43710
AT1G43720
AT1G43722
AT1G61200
AT1G61210
AT3G28910
AT3G14595
AT3G14600
AT4G02640
AT5G01100
AT1G19370
AT1G19371
AT1G19373
AT1G19376
AT1G19380
AT1G19390
AT1G34640
AT1G34650
AT1G34355
AT1G34360
AT2G14160
AT2G14170
AT3G43432
AT3G28918
AT3G60966
AT3G60970
AT4G13410
AT4G09462
AT4G09464
AT4G09465
AT5G13640
AT5G13650
AT5G26660
AT1G41830
AT2G12400
AT2G12405
AT2G15130
AT3G30280
AT3G30290
AT3G30300
AT3G30320
AT3G60961
AT4G17420
AT4G17430
AT4G08300
AT4G08310
AT4G08320
AT5G28210
AT5G28220
AT1G31970
AT1G35350
AT1G43160
AT1G44980
AT1G44990
AT1G45000
AT1G66160
AT1G50930
AT1G50940
AT1G50950
AT1G50954
AT2G15400
AT3G28990
AT3G29000
AT3G29010
AT3G29020
AT3G15620
AT3G15630
AT3G15640
AT4G09340
AT5G35510
AT5G35520
AT1G32400
AT1G32410
AT1G36640
AT1G42430
AT2G14045
AT3G19650
AT3G19660
AT3G19663
AT3G45140
AT3G45150
AT3G45160
AT3G60520
AT1G56730
AT1G56740
AT1G56750
AT1G56760
AT1G56770
AT1G56780
AT1G56790
AT1G56800
AT1G56810
AT1G56820
AT1G56830
AT1G56840
AT1G56850
AT1G56860
AT1G56870
AT1G56880
AT1G56890
AT1G56900
AT1G56910
AT1G17930
AT1G17940
AT1G17950
AT1G29490
AT1G29500
AT1G29510
AT1G29520
AT1G29530
AT1G29540
AT1G29550
AT1G29560
AT2G31040
AT2G31050
AT2G16595
AT3G06390
AT3G06400
AT4G05180
AT4G05190
AT4G05200
AT5G39400
AT5G39410
AT5G39420
AT5G39430
AT5G45290
AT5G45030
AT5G45040
AT5G45050
AT5G27730
AT1G54610
AT2G02800
AT2G04425
AT2G04430
AT3G16560
AT3G16565
AT3G16570
AT4G01660
AT4G09350
AT4G21323
AT4G21326
AT5G44530
AT5G44540
AT5G44550
AT5G44560
AT5G44562
AT5G37830
AT5G37840
AT5G35370
AT1G14260
AT1G14270
AT1G14280
AT1G36580
AT2G14700
AT2G14710
AT2G14720
AT2G02400
AT2G02410
AT2G16650
AT2G16660
AT3G29200
AT3G29638
AT3G29639
AT4G10970
AT4G04610
AT4G29260
AT4G29270
AT4G29273
AT4G29280
AT4G29283
AT4G11600
AT4G04620
AT4G01670
AT5G47950
AT5G47960
AT5G47970
AT5G47980
AT1G20990
AT1G14686
AT1G14687
AT1G14688
AT1G14690
AT2G12475
AT2G12480
AT2G10550
AT2G10557
AT2G10560
AT3G29030
AT3G22230
AT3G22231
AT5G27310
AT5G27320
AT5G27910
AT5G27920
AT1G59710
AT1G59720
AT1G44350
AT1G26740
AT1G26750
AT1G26760
AT1G26761
AT1G26762
AT1G29200
AT1G29220
AT1G29230
AT2G46505
AT2G46510
AT2G02810
AT2G03060
AT3G32920
AT3G32930
AT3G47550
AT3G47560
AT3G48720
AT3G48730
AT4G08868
AT4G08874
AT4G08875
AT5G28030
AT5G42590
AT5G42591
AT1G45010
AT1G31300
AT2G31060
AT3G43850
AT3G43860
AT4G04614
AT5G51170
AT5G51174
AT5G38660
AT5G38670
AT5G54450
AT5G54460
AT5G51451
AT5G51460
AT5G47190
AT5G35380
AT5G35390
AT5G42600
AT5G42610
AT5G42620
AT5G05570
AT1G35515
AT1G35516
AT1G66180
AT1G47900
AT1G43090
AT1G43100
AT1G69990
AT2G28470
AT2G28480
AT2G28490
AT2G01650
AT2G14740
AT2G23630
AT2G23640
AT2G23650
AT3G43440
AT3G18930
AT3G47570
AT4G07990
AT4G22440
AT4G22460
AT4G22470
AT4G22485
AT4G22490
AT4G04955
AT4G04957
AT4G28490
AT4G28500
AT4G00090
AT5G61210
AT5G37850
AT5G44565
AT1G61630
AT1G61640
AT1G61660
AT1G71860
AT1G17455
AT1G57820
AT1G57830
AT1G57835
AT1G57850
AT1G34550
AT2G15930
AT2G15950
AT2G29760
AT2G39190
AT2G01820
AT2G03680
AT2G03690
AT2G17130
AT2G17140
AT3G53520
AT3G43710
AT4G12460
AT4G08910
AT4G31500
AT5G36100
AT5G36110
AT5G36120
AT5G07490
AT5G07500
AT5G07510
AT5G07520
AT1G43790
AT1G43800
AT1G43810
AT1G43820
AT1G44478
AT1G71865
AT1G71866
AT2G22090
AT2G03500
AT2G03505
AT2G03510
AT2G21950
AT2G21960
AT2G22760
AT2G05760
AT2G01150
AT2G01160
AT2G01170
AT3G32940
AT3G32960
AT3G45248
AT3G45252
AT3G26420
AT3G26440
AT3G44530
AT3G44540
AT3G46410
AT3G46420
AT3G46430
AT3G28917
AT3G23780
AT3G23790
AT4G20140
AT4G27610
AT5G01160
AT5G19080
AT5G05500
AT5G05510
AT5G05520
AT5G24530
AT5G24540
AT5G24550
AT5G35400
AT1G69485
AT1G34210
AT1G47420
AT1G47450
AT1G67310
AT2G30140
AT2G36160
AT2G36170
AT2G36180
AT2G36190
AT3G62650
AT4G09570
AT4G12230
AT4G12240
AT4G04630
AT5G47200
AT1G30010
AT1G51160
AT1G78410
AT1G78420
AT1G31990
AT2G02040
AT2G02220
AT2G39675
AT2G39681
AT2G04063
AT2G04066
AT2G04070
AT2G04080
AT2G04090
AT2G47370
AT2G47380
AT2G47390
AT2G47400
AT2G17890
AT2G17900
AT2G43500
AT2G43510
AT2G43520
AT3G43660
AT3G43670
AT3G14400
AT3G14410
AT3G14415
AT3G26200
AT3G26210
AT3G47220
AT3G44290
AT4G38160
AT4G38170
AT4G25420
AT4G25430
AT4G25433
AT4G03030
AT4G03038
AT4G03039
AT4G03040
AT4G03050
AT5G45660
AT5G57450
AT5G57460
AT1G43140
AT1G70720
AT1G70730
AT1G47970
AT1G29240
AT1G11550
AT1G11560
AT2G13273
AT2G37680
AT2G37690
AT2G14080
AT3G47380
AT3G47390
AT3G44110
AT3G44115
AT3G44120
AT3G62450
AT3G58840
AT3G58850
AT4G27620
AT4G26150
AT4G26160
AT4G20210
AT4G20220
AT4G20230
AT5G38680
AT5G65640
AT5G65650
AT5G65110
AT5G65120
AT5G39730
AT5G61980
AT1G34220
AT1G34370
AT1G44940
AT1G44941
AT1G44960
AT1G21470
AT1G21480
AT1G21475
AT1G11280
AT1G53590
AT1G64100
AT1G64105
AT1G64107
AT1G64110
AT1G64120
AT2G14750
AT2G03070
AT2G05420
AT2G05430
AT2G05440
AT2G13370
AT2G02180
AT2G01640
AT2G18940
AT2G18950
AT2G24850
AT2G35920
AT2G21740
AT2G21750
AT2G21760
AT2G21770
AT2G21780
AT2G21790
AT2G21800
AT3G44260
AT3G44261
AT3G06460
AT3G06470
AT3G27720
AT3G27730
AT3G27740
AT3G27750
AT3G27770
AT3G45638
AT3G45640
AT3G25717
AT3G47370
AT3G13780
AT3G13782
AT3G13784
AT4G16765
AT4G08330
AT5G56865
AT5G36940
AT5G39740
AT5G35730
AT5G38890
AT5G38895
AT5G02880
AT5G01170
AT5G35700
AT1G30020
AT1G30016
AT1G35580
AT1G43145
AT1G32630
AT1G32640
AT1G17460
AT1G17470
AT1G51150
AT1G57860
AT1G57870
AT2G14000
AT2G19050
AT2G19060
AT2G19070
AT2G19080
AT2G34110
AT2G34080
AT2G38170
AT2G38180
AT2G38185
AT2G38195
AT2G02320
AT2G02340
AT2G02350
AT2G02360
AT2G02370
AT3G44710
AT3G44713
AT3G29255
AT3G62590
AT3G62600
AT3G43720
AT3G43722
AT4G17620
AT4G17640
AT4G05070
AT4G05071
AT4G15563
AT4G09460
AT4G04870
AT4G04880
AT4G21650
AT4G21660
AT4G21670
AT4G36290
AT4G36350
AT4G14420
AT4G32460
AT4G20150
AT4G20160
AT5G43790
AT5G56940
AT5G56950
AT5G21950
AT5G21960
AT5G65760
AT5G27950
AT5G05580
AT5G46295
AT5G46300
AT1G27970
AT1G27980
AT1G27990
AT1G28000
AT1G55675
AT1G55680
AT1G34380
AT1G34390
AT1G51170
AT1G51172
AT1G25530
AT1G25540
AT1G50960
AT1G50970
AT1G50980
AT1G50990
AT1G52160
AT1G52170
AT1G52180
AT1G52185
AT1G22900
AT1G22910
AT1G32790
AT1G32810
AT2G05914
AT2G05915
AT2G05920
AT2G22790
AT2G30260
AT2G30270
AT2G06990
AT2G07000
AT2G13290
AT2G05120
AT2G28340
AT3G50420
AT3G50430
AT3G44600
AT3G04350
AT3G04360
AT3G27860
AT3G27865
AT3G44330
AT4G27630
AT4G04540
AT4G34720
AT4G34730
AT4G10925
AT4G10930
AT4G13780
AT4G13790
AT4G13800
AT4G13810
AT4G14455
AT4G08455
AT4G20330
AT4G20340
AT5G37740
AT5G47210
AT5G37070
AT5G42630
AT5G42635
AT5G43050
AT5G53280
AT5G54210
AT1G08270
AT1G08280
AT1G13220
AT1G49180
AT1G36310
AT1G36320
AT1G22500
AT1G46554
AT1G65540
AT1G65541
AT1G65550
AT1G67020
AT1G67025
AT1G67030
AT1G67035
AT2G15695
AT2G25000
AT2G25010
AT2G41342
AT2G41350
AT2G24860
AT2G24870
AT2G29070
AT2G28370
AT2G21970
AT2G21980
AT2G16400
AT2G38100
AT2G38110
AT3G46460
AT3G46470
AT3G46480
AT3G10060
AT3G10070
AT3G29320
AT3G45040
AT3G45050
AT3G45060
AT3G18450
AT3G18460
AT3G18470
AT3G18480
AT4G36910
AT4G08930
AT4G14430
AT4G14440
AT4G10845
AT4G17785
AT4G17788
AT4G17790
AT4G11310
AT4G11320
AT4G11330
AT5G35405
AT5G16730
AT5G39750
AT5G50400
AT5G22070
AT5G28950
AT5G28960
AT5G27600
AT5G55070
AT5G13770
AT5G47110
AT1G67320
AT1G67325
AT1G30330
AT1G71870
AT1G26945
AT1G27840
AT1G27752
AT1G27760
AT1G01010
AT1G52640
AT1G52650
AT1G30320
AT1G11290
AT1G11300
AT2G28160
AT2G28170
AT2G28180
AT2G13100
AT2G41190
AT2G41200
AT2G01220
AT2G16850
AT2G16860
AT2G16870
AT2G14960
AT2G01270
AT2G05990
AT3G47250
AT3G24612
AT3G24614
AT3G24615
AT3G24620
AT3G62610
AT3G14420
AT3G15150
AT3G15160
AT3G17310
AT3G17320
AT3G17330
AT3G17340
AT3G29060
AT3G13240
AT3G43960
AT3G27240
AT4G15020
AT4G15030
AT4G15570
AT4G19670
AT4G19680
AT4G05060
AT4G36510
AT4G36515
AT5G25250
AT5G35630
AT5G58590
AT5G58595
AT5G58600
AT5G63920
AT5G63500
AT5G63510
AT5G38320
AT5G38330
AT5G38340
AT5G61990
AT5G48140
AT5G03650
AT5G03660
AT5G35410
AT5G45307
AT5G24750
AT5G24760
AT1G57906
AT1G14590
AT1G14600
AT1G15540
AT1G15550
AT1G72420
AT1G69500
AT1G69510
AT1G55060
AT1G55070
AT1G55080
AT1G21000
AT1G69770
AT2G16640
AT2G04480
AT2G04630
AT3G30160
AT3G29190
AT3G29195
AT3G50440
AT3G12900
AT3G23080
AT3G24535
AT3G24540
AT3G19340
AT3G19350
AT3G23955
AT3G23960
AT3G23970
AT3G23980
AT3G23990
AT3G52140
AT3G52150
AT3G52155
AT3G17020
AT3G17030
AT4G17460
AT4G30220
AT4G15520
AT4G12470
AT4G34740
AT4G34750
AT4G34760
AT4G09750
AT4G01740
AT4G11350
AT4G09440
AT4G09450
AT4G19980
AT4G19985
AT4G19990
AT4G00150
AT4G02910
AT4G02920
AT4G17470
AT5G28180
AT5G28190
AT5G47780
AT5G59970
AT5G59980
AT5G59990
AT5G08090
AT5G08100
AT5G08110
AT5G28237
AT5G01280
AT5G01290
AT5G53170
AT5G53180
AT5G36930
AT5G01110
AT5G01120
AT5G01130
AT5G39450
AT5G39460
AT5G39470
AT5G39471
AT5G25265
AT5G53490
AT5G37620
AT5G11080
AT1G36280
AT1G32430
AT1G32440
AT1G14310
AT1G14315
AT1G14320
AT1G42960
AT1G32583
AT1G32582
AT1G32585
AT1G63050
AT1G63055
AT1G23960
AT1G23965
AT1G55325
AT1G55330
AT1G27070
AT1G27080
AT1G23280
AT1G23290
AT1G23300
AT1G23310
AT1G23320
AT1G23330
AT1G79070
AT1G79075
AT2G17570
AT2G22410
AT2G15430
AT2G16790
AT2G16800
AT2G16810
AT2G16835
AT2G28290
AT2G45170
AT2G02090
AT2G02060
AT2G02061
AT2G23020
AT2G23030
AT2G23040
AT2G02990
AT2G03000
AT2G19820
AT3G14430
AT3G26240
AT3G26510
AT3G26511
AT3G60550
AT3G13070
AT3G13080
AT3G60140
AT4G05080
AT4G05090
AT4G04940
AT4G04950
AT4G01690
AT4G13554
AT4G33250
AT4G33260
AT4G33270
AT4G26700
AT4G05490
AT4G05494
AT4G05497
AT5G25260
AT5G51180
AT5G44569
AT5G27770
AT5G27780
AT5G27790
AT5G17830
AT5G17840
AT5G64530
AT5G35870
AT5G35890
AT5G11070
AT5G07360
AT5G07370
AT5G04330
AT5G07000
AT5G07010
AT5G20710
AT5G20720
AT5G27606
AT5G38690
AT1G69520
AT1G65480
AT1G32450
AT1G62270
AT1G62280
AT1G51805
AT1G51810
AT1G22520
AT1G58320
AT1G58330
AT1G33590
AT1G30810
AT1G30814
AT1G24350
AT1G24360
AT1G24380
AT1G24388
AT1G24390
AT1G05260
AT1G05270
AT1G05280
AT1G57340
AT1G57350
AT1G57360
AT1G57370
AT1G57380
AT1G57390
AT1G57400
AT1G57410
AT1G57420
AT1G57430
AT1G57440
AT1G57450
AT1G57460
AT1G57470
AT1G57480
AT1G57490
AT1G57500
AT1G57510
AT1G57520
AT1G57530
AT2G29630
AT2G29640
AT2G40720
AT2G15890
AT2G36910
AT2G28380
AT2G34090
AT3G23340
AT3G27870
AT3G44010
AT3G44020
AT3G05675
AT3G05680
AT3G04370
AT3G04380
AT3G22960
AT3G28155
AT3G57062
AT3G57070
AT3G57072
AT3G57080
AT3G57090
AT3G47720
AT3G47730
AT3G47740
AT3G60670
AT4G17100
AT4G29130
AT4G26180
AT4G08960
AT4G01370
AT4G28556
AT4G28560
AT4G28564
AT4G28570
AT4G22530
AT4G22540
AT4G29090
AT4G31520
AT4G13940
AT4G20360
AT4G20362
AT4G11860
AT4G36050
AT4G36060
AT4G36070
AT4G08025
AT4G08028
AT4G37553
AT5G45310
AT5G45320
AT5G26220
AT5G28050
AT5G28262
AT5G40440
AT5G40450
AT5G65630
AT5G49500
AT5G49510
AT5G24270
AT5G53400
AT5G62660
AT5G03960
AT5G03970
AT5G17370
AT5G17380
AT5G26770
AT5G26980
AT5G19070
AT5G35830
AT5G35840
AT5G23850
AT5G06220
AT5G51490
AT5G51500
AT5G51510
AT5G35790
AT5G54490
AT5G54500
AT5G50770
AT5G50780
AT1G67328
AT1G67330
AT1G57943
AT1G01020
AT1G11230
AT1G11240
AT1G47410
AT1G80400
AT1G56180
AT1G56190
AT1G56165
AT1G56170
AT1G76870
AT1G35150
AT1G35160
AT1G18690
AT1G18700
AT1G44446
AT1G52510
AT1G52520
AT1G31520
AT1G31530
AT1G31540
AT1G45050
AT1G69730
AT1G69740
AT1G27540
AT1G27550
AT1G27565
AT1G27570
AT1G13230
AT1G13240
AT2G41530
AT2G25355
AT2G25360
AT2G25370
AT2G22420
AT2G22425
AT2G15090
AT2G41360
AT2G29650
AT2G27760
AT2G14247
AT2G04550
AT2G18180
AT2G22950
AT2G22955
AT2G22960
AT2G22970
AT3G48740
AT3G44080
AT3G44090
AT3G44091
AT3G43970
AT3G43980
AT3G43990
AT3G27325
AT3G23160
AT3G28270
AT3G28280
AT3G11550
AT3G11560
AT3G18779
AT3G18780
AT3G18790
AT3G45560
AT3G45570
AT3G45577
AT3G45580
AT3G45590
AT3G25610
AT3G25620
AT3G18680
AT3G18690
AT4G13260
AT4G13265
AT4G13270
AT4G03292
AT4G03295
AT4G12270
AT4G04970
AT4G04972
AT4G04980
AT4G04985
AT4G13555
AT4G13560
AT4G13570
AT4G13564
AT4G13572
AT4G25440
AT4G25450
AT4G03560
AT4G05210
AT4G05220
AT4G05230
AT4G05240
AT4G05250
AT4G05260
AT4G09150
AT4G05048
AT4G05050
AT4G40020
AT4G40030
AT4G30230
AT4G30240
AT4G21330
AT5G37340
AT5G37350
AT5G37351
AT5G36210
AT5G36220
AT5G47990
AT5G48000
AT5G24870
AT5G24879
AT5G42203
AT5G52350
AT5G52355
AT5G52360
AT5G52370
AT5G52380
AT5G09680
AT5G09690
AT5G44570
AT5G44572
AT5G26690
AT5G26680
AT5G62820
AT5G62830
AT5G62840
AT5G62850
AT5G62848
AT5G62860
AT5G62865
AT5G05000
AT5G05010
AT5G37000
AT5G25790
AT5G25800
AT5G42820
AT5G42825
AT5G03360
AT5G55020
AT5G57640
AT5G57650
AT1G26900
AT1G75420
AT1G15160
AT1G15165
AT1G15170
AT1G33230
AT1G76590
AT1G16630
AT1G16635
AT1G16640
AT1G67040
AT1G32290
AT1G32300
AT1G32310
AT1G32320
AT1G05350
AT1G05360
AT1G43950
AT1G59910
AT1G59920
AT1G59930
AT1G54700
AT1G54710
AT1G54170
AT1G54180
AT1G44835
AT1G57540
AT1G57550
AT1G16340
AT1G16350
AT1G54960
AT1G54970
AT1G54980
AT1G54990
AT1G76830
AT1G76840
AT1G76850
AT1G76860
AT1G31310
AT1G62370
AT2G06210
AT2G47420
AT2G47430
AT2G01660
AT2G04780
AT2G02390
AT2G17200
AT2G17210
AT2G18990
AT2G19000
AT2G19010
AT2G19020
AT2G19030
AT2G19040
AT2G27920
AT2G16005
AT2G16015
AT2G02835
AT2G02840
AT2G02850
AT2G41220
AT2G23200
AT2G23210
AT2G23220
AT2G38070
AT2G34050
AT2G34060
AT2G24560
AT3G23810
AT3G61150
AT3G61160
AT3G61170
AT3G27999
AT3G28007
AT3G60360
AT3G60370
AT3G50640
AT3G50650
AT3G45030
AT3G43420
AT3G52630
AT3G52640
AT3G52660
AT3G52670
AT3G62470
AT3G26750
AT3G26760
AT3G26770
AT3G26780
AT3G19930
AT3G44550
AT3G44440
AT3G04040
AT4G14450
AT4G31354
AT4G31355
AT4G35440
AT4G35450
AT4G08876
AT4G08878
AT4G04320
AT4G07965
AT4G17483
AT4G10530
AT4G10540
AT4G10550
AT4G10560
AT4G08460
AT4G32190
AT4G29580
AT4G29590
AT4G04885
AT5G47790
AT5G65290
AT5G45090
AT5G24180
AT5G33300
AT5G42190
AT5G57690
AT5G57700
AT5G14080
AT5G19380
AT5G56452
AT5G56460
AT5G59613
AT5G22800
AT5G22810
AT5G22820
AT5G22830
AT5G01881
AT5G01890
AT5G40100
AT5G40120
AT5G27930
AT5G62420
AT5G62430
AT5G06700
AT1G55340
AT1G58350
AT1G57980
AT1G52530
AT1G11200
AT1G11210
AT1G11220
AT1G34245
AT1G66520
AT1G66530
AT1G01448
AT1G01450
AT1G01453
AT1G01460
AT1G20270
AT1G20280
AT1G54380
AT1G54385
AT1G54390
AT1G16650
AT1G29910
AT1G29920
AT1G29930
AT1G29940
AT2G22170
AT2G22180
AT2G31890
AT2G26100
AT2G26110
AT2G22426
AT2G05100
AT2G31260
AT2G41370
AT2G37035
AT2G45200
AT2G29654
AT2G04305
AT2G28190
AT2G26590
AT2G26600
AT3G29070
AT3G60150
AT3G12915
AT3G26520
AT3G46100
AT3G50660
AT3G28925
AT3G28930
AT3G55250
AT3G46510
AT3G46520
AT3G24330
AT3G24332
AT3G24340
AT3G24350
AT3G26450
AT3G44240
AT3G44250
AT3G44428
AT3G44430
AT4G08280
AT4G10290
AT4G10300
AT4G02660
AT4G12917
AT4G10140
AT4G30330
AT4G30340
AT4G34570
AT4G34580
AT4G11010
AT4G11020
AT4G11030
AT4G00170
AT4G00180
AT4G21430
AT4G01671
AT4G04650
AT5G28052
AT5G64720
AT5G64730
AT5G43403
AT5G43410
AT5G20730
AT5G48543
AT5G48545
AT5G48550
AT5G48560
AT5G37450
AT5G37460
AT5G37470
AT5G08120
AT5G39020
AT5G39024
AT5G39030
AT5G51190
AT5G38050
AT5G39970
AT5G39980
AT5G39990
AT5G02200
AT5G25780
AT5G47320
AT5G47330
AT5G65780
AT5G55590
AT5G55600
AT5G55610
AT5G23190
AT5G22700
AT5G22720
AT5G54510
AT5G63810
AT5G63820
AT5G63830
AT5G63840
AT5G59460
AT5G59470
AT5G37020
AT5G07930
AT5G07940
AT5G19250
AT5G19257
AT5G19260
AT1G29250
AT1G29260
AT1G29265
AT1G29270
AT1G22700
AT1G22710
AT1G27770
AT1G12920
AT1G12930
AT1G13320
AT1G13330
AT1G23110
AT1G23120
AT1G23130
AT1G13900
AT1G13910
AT1G54670
AT1G54680
AT1G54690
AT1G79080
AT1G31070
AT1G31080
AT1G31090
AT1G72270
AT1G72280
AT1G47990
AT1G33520
AT1G13920
AT1G13930
AT1G20860
AT1G20870
AT1G20875
AT1G20880
AT1G58235
AT1G58242
AT1G65120
AT1G65130
AT1G65140
AT1G65150
AT1G65160
AT1G24510
AT1G24520
AT1G65481
AT1G29630
AT1G52790
AT1G52800
AT1G69780
AT1G57600
AT1G51660
AT1G08460
AT1G08465
AT1G08470
AT1G08480
AT1G08490
AT1G22440
AT1G22450
AT1G22460
AT1G22470
AT1G22480
AT1G22490
AT1G09950
AT1G36940
AT1G36942
AT1G36950
AT1G63057
AT1G63060
AT1G55090
AT1G55110
AT1G33560
AT1G31760
AT1G03670
AT1G03680
AT1G03687
AT1G03700
AT1G03710
AT1G03720
AT2G14095
AT2G14100
AT2G04280
AT2G15042
AT2G22100
AT2G22110
AT2G22120
AT2G45970
AT2G39770
AT2G39780
AT2G39782
AT2G41880
AT2G15345
AT2G15350
AT2G15360
AT2G48030
AT2G03220
AT2G03230
AT2G20530
AT2G20540
AT2G20550
AT2G34600
AT2G34610
AT2G34620
AT2G34630
AT2G34640
AT2G16290
AT2G16300
AT2G03610
AT2G03620
AT2G03630
AT3G28660
AT3G61860
AT3G61870
AT3G45170
AT3G45180
AT3G45190
AT3G45200
AT3G29130
AT3G23410
AT3G23420
AT3G23430
AT3G60080
AT3G60090
AT3G44798
AT3G44800
AT3G44805
AT3G15480
AT3G15490
AT3G49070
AT3G49080
AT3G49100
AT3G20830
AT4G13160
AT4G13170
AT4G11120
AT4G05130
AT4G40011
AT4G04040
AT4G32070
AT4G32080
AT4G32090
AT4G20310
AT4G35200
AT4G35210
AT4G35220
AT4G25434
AT4G25435
AT4G16740
AT4G16745
AT4G29080
AT4G05265
AT4G05270
AT4G18290
AT4G18300
AT4G10950
AT4G10960
AT4G10955
AT5G24990
AT5G36900
AT5G24900
AT5G24910
AT5G66140
AT5G36250
AT5G22090
AT5G47800
AT5G40870
AT5G40880
AT5G53450
AT5G21326
AT5G03370
AT5G11270
AT5G11280
AT5G11290
AT5G53240
AT5G53250
AT5G53260
AT5G53270
AT5G62670
AT5G13225
AT5G13230
AT5G37860
AT5G37870
AT5G11420
AT5G11425
AT5G11430
AT5G37630
AT5G37640
AT5G41614
AT5G41620
AT5G09960
AT5G63940
AT5G03980
AT5G03990
AT5G13610
AT5G17550
AT5G17560
AT5G27238
AT5G27240
AT5G20160
AT5G20165
AT5G65890
AT5G65900
AT5G17180
AT5G17190
AT5G49610
AT5G49615
AT5G49620
AT5G24710
AT5G02220
AT1G61860
AT1G61870
AT1G61880
AT1G26960
AT1G26970
AT1G26973
AT1G26975
AT1G26976
AT1G26985
AT1G69010
AT1G69020
AT1G74770
AT1G74780
AT1G21280
AT1G21281
AT1G66370
AT1G66380
AT1G75430
AT1G34392
AT1G56200
AT1G71695
AT1G71696
AT1G45403
AT1G45474
AT1G52910
AT1G52920
AT1G52930
AT1G57780
AT1G57790
AT1G57800
AT1G62390
AT1G62400
AT2G24880
AT2G44060
AT2G44065
AT2G04650
AT2G04660
AT2G36670
AT2G36680
AT2G28100
AT2G28315
AT2G05180
AT2G05185
AT2G15900
AT2G15300
AT2G15000
AT2G15010
AT2G46090
AT2G21140
AT2G21150
AT2G15560
AT2G36020
AT2G36026
AT2G36030
AT2G20440
AT2G20450
AT2G01830
AT3G06480
AT3G06483
AT3G04050
AT3G28060
AT3G28070
AT3G28080
AT3G49630
AT3G49640
AT3G47610
AT3G22961
AT3G46790
AT3G46800
AT3G12950
AT3G12955
AT3G24460
AT3G24465
AT3G45320
AT3G45330
AT3G18800
AT3G18810
AT3G23010
AT3G23020
AT3G28920
AT3G46610
AT3G46613
AT3G56010
AT3G02130
AT4G11130
AT4G03298
AT4G38430
AT4G17486
AT4G28510
AT4G28520
AT4G37250
AT4G30250
AT4G21340
AT4G17840
AT4G17850
AT4G16770
AT4G01460
AT4G36808
AT4G36810
AT4G02465
[truncated: 24,965 more rows]
