# Supplementary material for: Polycomb-dependent differential chromatin compartmentalization determines gene coregulation in Arabidopsis
Source: HighWire-hosted journal article supplement (doi:10.1101/gr.273771.120), 2021-06-03
Supplement: Supplemental_Table_S4.xlsx [file Supplemental_Table_S4.xlsx]

## Sheet: S4
Supplementary Table S4: Short and long range interactions for H3K27me3
chr1	s1	e1	chr2	s2	e2	Distance	Log(Distance)	cc	P-Value_Bias	Q-Value_Bias	bin1_low	bin1_high	bin2_low	bin2_high	sumCC	StrongConn	Gene1	Gene2
Chr1	9015000	9016000	Chr1	9016000	9017000	2000	3.30103	70	2.71094e-07	0.000642443	9015000	9017000	9016000	9019000	357	0.5	NA	AT1G25988
Chr1	27280000	27281000	Chr1	27281000	27282000	2000	3.30103	90	4.7583e-09	2.35271e-05	27279000	27281000	27280000	27282000	212	0.75	AT1G72440,AT1G72450,AT1G72460	AT1G72460,AT1G72470,AT1G72480,AT1G72490
Chr1	23113000	23114000	Chr1	23114000	23115000	2000	3.30103	98	4.64151e-12	6.18169e-08	23113000	23114000	23114000	23117000	323	1	AT1G62440	AT1G62440
Chr1	30424000	30425000	Chr1	30425000	30426000	2000	3.30103	59	4.89095e-10	3.39404e-06	30424000	30426000	30425000	30427000	103	0.75	AT1G80950,AT1G80960,AT1G80970,AT1G80980,AT1G80990	AT1G80990
Chr1	26297000	26298000	Chr1	26298000	26299000	2000	3.30103	161	1.97375e-09	1.11285e-05	26296000	26298000	26298000	26299000	221	1	AT1G69830,AT1G69840,AT1G69850	AT1G69850
Chr1	6302000	6303000	Chr1	6303000	6304000	2000	3.30103	132	2.16686e-10	1.7354e-06	6301000	6303000	6303000	6304000	181	1	AT1G18270,AT1G18280,AT1G18290,AT1G18300,AT1G18310	AT1G18310,AT1G18320,AT1G18330
Chr1	7976000	7977000	Chr1	7977000	7978000	2000	3.30103	86	1.18004e-08	5.03755e-05	7976000	7978000	7977000	7979000	192	0.5	AT1G22570	AT1G22570
Chr1	904000	905000	Chr1	905000	906000	2000	3.30103	78	2.6117e-08	9.65756e-05	904000	906000	905000	907000	155	0.5	AT1G03590,AT1G03600,AT1G03610,AT1G03620	AT1G03620,AT1G03630,AT1G03640,AT1G03650,AT1G03660,AT1G03670
Chr1	20098000	20099000	Chr1	20099000	20100000	2000	3.30103	78	1.4333e-07	0.000386082	20098000	20099000	20099000	20101000	154	1	AT1G53815,AT1G53820,AT1G53830	AT1G53830,AT1G53840,AT1G53850,AT1G53860
Chr1	11317000	11318000	Chr1	11318000	11319000	2000	3.30103	167	6.12343e-07	0.00123016	11317000	11318000	11318000	11320000	244	1	AT1G31620	AT1G31630,AT1G31640
Chr1	11811000	11812000	Chr1	11812000	11813000	2000	3.30103	281	4.25593e-07	0.000918676	11811000	11812000	11812000	11814000	496	1	AT1G32650,AT1G32660	AT1G32660
Chr1	26377000	26378000	Chr1	26378000	26379000	2000	3.30103	143	4.0486e-10	2.93294e-06	26377000	26378000	26378000	26380000	199	1	AT1G70020	AT1G70020,AT1G70030
Chr1	21761000	21762000	Chr1	21762000	21763000	2000	3.30103	103	3.96291e-07	0.000870758	21760000	21762000	21762000	21763000	214	1	AT1G58602	AT1G58602
Chr1	28395000	28396000	Chr1	28396000	28397000	2000	3.30103	216	6.35149e-12	8.14158e-08	28394000	28396000	28396000	28397000	285	1	AT1G75600,AT1G75620	AT1G75620,AT1G75630,AT1G75640
Chr1	30384000	30385000	Chr1	30385000	30386000	2000	3.30103	97	5.59153e-11	5.33624e-07	30383000	30385000	30385000	30386000	132	1	AT1G80840	AT1G80840,AT1G80850
Chr1	25713000	25714000	Chr1	25714000	25715000	2000	3.30103	312	7.04373e-16	2.80649e-11	25712000	25714000	25714000	25715000	420	1	AT1G68526,AT1G68530	AT1G68530,AT1G68540
Chr1	6510000	6511000	Chr1	6511000	6512000	2000	3.30103	117	3.93015e-08	0.00013548	6509000	6511000	6510000	6512000	222	0.5	AT1G18840,AT1G18850,AT1G18860	AT1G18860,AT1G18870,AT1G18871,AT1G18880,AT1G18879
Chr1	7367000	7368000	Chr1	7368000	7369000	2000	3.30103	139	1.17737e-09	7.16195e-06	7366000	7368000	7367000	7369000	280	0.5	AT1G21050	AT1G21060,AT1G21065,AT1G21070,AT1G21080
Chr1	21968000	21969000	Chr1	21969000	21970000	2000	3.30103	92	1.39751e-07	0.00037879	21968000	21969000	21969000	21970000	92	1	AT1G59740	AT1G59740,AT1G59750
Chr1	10974000	10975000	Chr1	10975000	10976000	2000	3.30103	125	3.66726e-09	1.89149e-05	10974000	10975000	10975000	10976000	125	1	AT1G30840	AT1G30840,AT1G30845,AT1G30850
Chr1	3763000	3764000	Chr1	3764000	3765000	2000	3.30103	98	3.35657e-05	0.0266854	3763000	3764000	3764000	3765000	98	1	AT1G11200,AT1G11210,AT1G11220,AT1G11230	AT1G11230
Chr1	104000	105000	Chr1	105000	106000	2000	3.30103	72	8.74762e-12	1.06424e-07	104000	105000	105000	106000	72	1	AT1G01220,AT1G01225,AT1G01230,AT1G01240,AT1G01250	AT1G01250,AT1G01260,AT1G01270,AT1G01280,AT1G01290
Chr1	23146000	23147000	Chr1	23147000	23148000	2000	3.30103	76	6.34164e-06	0.00756701	23146000	23147000	23147000	23148000	76	1	AT1G62520,AT1G62530	AT1G62530,AT1G62540
Chr1	7696000	7697000	Chr1	7697000	7698000	2000	3.30103	45	4.21497e-05	0.0315777	7696000	7697000	7697000	7698000	45	1	AT1G21900,AT1G21910	AT1G21910,AT1G21920
Chr1	24007000	24008000	Chr1	24008000	24009000	2000	3.30103	243	1.31164e-10	1.12996e-06	24007000	24008000	24008000	24009000	243	1	AT1G64600,AT1G64610,AT1G64618,AT1G64620	AT1G64620,AT1G64625
Chr1	15980000	15981000	Chr1	15981000	15982000	2000	3.30103	62	7.61275e-07	0.0014536	15980000	15981000	15981000	15982000	62	1	AT1G42540,AT1G42550,AT1G42560	AT1G42560
Chr1	20235000	20236000	Chr1	20236000	20237000	2000	3.30103	107	1.44314e-05	0.0143154	20235000	20236000	20236000	20237000	107	1	AT1G54200	AT1G54200
Chr1	7886000	7887000	Chr1	7887000	7888000	2000	3.30103	32	2.59039e-07	0.000620818	7886000	7887000	7887000	7888000	32	1	AT1G22290,AT1G22300,AT1G22310,AT1G22320,AT1G22330	AT1G22330
Chr1	22601000	22602000	Chr1	22602000	22603000	2000	3.30103	84	6.13352e-06	0.00737481	22601000	22602000	22602000	22603000	84	1	AT1G61270	AT1G61270,AT1G61275,AT1G61280,AT1G61290,AT1G61300
Chr1	57000	58000	Chr1	58000	59000	2000	3.30103	150	2.99879e-21	3.58092e-16	57000	58000	58000	59000	150	1	AT1G01100,AT1G01110,AT1G01115,AT1G01120	AT1G01120,AT1G01130,AT1G01140
Chr1	27999000	28000000	Chr1	28000000	28001000	2000	3.30103	29	5.32592e-07	0.00109478	27999000	28000000	28000000	28001000	29	1	NA	NA
Chr1	19000	20000	Chr1	20000	21000	2000	3.30103	33	1.89031e-05	0.0175565	19000	20000	20000	21000	33	1	NA	NA
Chr1	6622000	6623000	Chr1	6623000	6624000	2000	3.30103	63	6.06609e-06	0.00731506	6622000	6623000	6623000	6624000	63	1	AT1G19140,AT1G19150,AT1G19160,AT1G19170,AT1G19180	AT1G19180,AT1G19190
Chr1	4974000	4975000	Chr1	4975000	4976000	2000	3.30103	125	1.91033e-07	0.000486097	4974000	4975000	4975000	4976000	125	1	AT1G14510,AT1G14518,AT1G14520,AT1G14530,AT1G14540	AT1G14540,AT1G14549,AT1G14550,AT1G14560,AT1G14570
Chr1	138000	139000	Chr1	139000	140000	2000	3.30103	87	3.09361e-11	3.24372e-07	138000	139000	139000	140000	87	1	AT1G01350,AT1G01355	AT1G01355,AT1G01360,AT1G01370,AT1G01380,AT1G01390
Chr1	19028000	19029000	Chr1	19029000	19030000	2000	3.30103	88	5.8373e-07	0.00118246	19028000	19029000	19029000	19030000	88	1	AT1G51310,AT1G51320,AT1G51330	AT1G51330,AT1G51340,AT1G51350
Chr1	14158000	14159000	Chr1	14159000	14160000	2000	3.30103	67	8.66514e-07	0.00160645	14158000	14159000	14159000	14160000	67	1	AT1G37130	AT1G37130
Chr1	18763000	18764000	Chr1	18764000	18765000	2000	3.30103	167	4.78591e-08	0.000158797	18763000	18764000	18764000	18765000	167	1	AT1G50650	AT1G50650
Chr1	29498000	29499000	Chr1	29499000	29500000	2000	3.30103	144	1.3927e-09	8.27185e-06	29498000	29499000	29499000	29500000	144	1	AT1G78390,AT1G78400	AT1G78400,AT1G78410,AT1G78420,AT1G78430
Chr1	18203000	18204000	Chr1	18204000	18205000	2000	3.30103	143	7.12793e-05	0.0464966	18203000	18204000	18204000	18205000	143	1	AT1G49190,AT1G49200,AT1G49210	AT1G49220,AT1G49230
Chr1	27464000	27465000	Chr1	27465000	27466000	2000	3.30103	109	2.17838e-05	0.019479	27464000	27465000	27465000	27466000	109	1	AT1G72970,AT1G72980,AT1G72990,AT1G73000,AT1G73010	AT1G73010,AT1G73020,AT1G73030,AT1G73040
Chr1	26321000	26322000	Chr1	26322000	26323000	2000	3.30103	64	2.80548e-06	0.00404393	26321000	26322000	26322000	26323000	64	1	AT1G69880	AT1G69880,AT1G69890,AT1G69900,AT1G69910
Chr1	29182000	29183000	Chr1	29183000	29184000	2000	3.30103	133	9.5203e-10	6.01895e-06	29182000	29183000	29183000	29184000	133	1	AT1G77620,AT1G77630,AT1G77640,AT1G77650,AT1G77655	AT1G77655,AT1G77660,AT1G77670,AT1G77680
Chr1	496000	497000	Chr1	497000	498000	2000	3.30103	108	2.61475e-06	0.00383843	496000	497000	497000	498000	108	1	AT1G02405,AT1G02410,AT1G02420,AT1G02430,AT1G02440	AT1G02440,AT1G02450
Chr1	27660000	27661000	Chr1	27661000	27662000	2000	3.30103	92	1.54318e-07	0.000409	27660000	27661000	27661000	27662000	92	1	AT1G73590	AT1G73590,AT1G73600,AT1G73602
Chr1	16933000	16934000	Chr1	16934000	16935000	2000	3.30103	76	1.3616e-06	0.00230366	16933000	16934000	16934000	16935000	76	1	AT1G44810,AT1G44820,AT1G44830	AT1G44830,AT1G44835
Chr1	27058000	27059000	Chr1	27059000	27060000	2000	3.30103	122	1.94873e-08	7.66863e-05	27058000	27059000	27059000	27060000	122	1	AT1G71890	AT1G71890,AT1G71900,AT1G71910,AT1G71920
Chr1	6700000	6701000	Chr1	6701000	6702000	2000	3.30103	122	4.06e-06	0.0053579	6700000	6701000	6701000	6702000	122	1	AT1G19370,AT1G19371,AT1G19373,AT1G19376,AT1G19380,AT1G19390	AT1G19390
Chr1	582000	583000	Chr1	583000	584000	2000	3.30103	92	6.10926e-06	0.00735212	582000	583000	583000	584000	92	1	AT1G02680	AT1G02690,AT1G02700,AT1G02710,AT1G02720
Chr1	2439000	2440000	Chr1	2440000	2441000	2000	3.30103	64	1.1811e-15	4.37129e-11	2439000	2440000	2440000	2441000	64	1	AT1G07880,AT1G07885,AT1G07890	AT1G07900,AT1G07901,AT1G07910
Chr1	4542000	4543000	Chr1	4543000	4544000	2000	3.30103	66	3.33967e-15	1.03018e-10	4542000	4543000	4543000	4544000	66	1	AT1G13260	AT1G13260,AT1G13270
Chr1	21207000	21208000	Chr1	21208000	21209000	2000	3.30103	116	4.17052e-10	3.00306e-06	21207000	21208000	21208000	21209000	116	1	AT1G56570,AT1G56580,AT1G56590,AT1G56600	AT1G56600,AT1G56610,AT1G56612
Chr1	619000	620000	Chr1	620000	621000	2000	3.30103	91	1.07042e-06	0.00190755	619000	620000	620000	621000	91	1	AT1G02780,AT1G02790,AT1G02800,AT1G02810	AT1G02810,AT1G02813,AT1G02816,AT1G02820,AT1G02830,AT1G02840,AT1G02850
Chr1	5978000	5979000	Chr1	5979000	5980000	2000	3.30103	70	4.45028e-07	0.000949627	5978000	5979000	5979000	5980000	70	1	AT1G17410,AT1G17420	AT1G17420,AT1G17430,AT1G17440,AT1G17450
Chr1	8914000	8915000	Chr1	8915000	8916000	2000	3.30103	227	3.5408e-20	3.455e-15	8914000	8915000	8915000	8916000	227	1	AT1G25380,AT1G25390,AT1G25400,AT1G25410	AT1G25410,AT1G25420,AT1G25422
Chr1	4064000	4065000	Chr1	4065000	4066000	2000	3.30103	64	5.95765e-07	0.00120241	4064000	4065000	4065000	4066000	64	1	AT1G12010,AT1G12013,AT1G12015,AT1G12020,AT1G12030	AT1G12030,AT1G12040,AT1G12050
Chr1	2984000	2985000	Chr1	2985000	2986000	2000	3.30103	166	2.68143e-06	0.0039135	2984000	2985000	2985000	2986000	166	1	AT1G09210,AT1G09220,AT1G09230,AT1G09240	AT1G09240,AT1G09245,AT1G09250
Chr1	19697000	19698000	Chr1	19698000	19699000	2000	3.30103	45	1.16543e-06	0.00204278	19697000	19698000	19698000	19699000	45	1	AT1G52890	AT1G52890,AT1G52900,AT1G52905,AT1G52910
Chr1	29779000	29780000	Chr1	29780000	29781000	2000	3.30103	72	1.72398e-09	9.9191e-06	29779000	29780000	29780000	29781000	72	1	AT1G79160	AT1G79160,AT1G79170,AT1G79180,AT1G79190
Chr1	25709000	25710000	Chr1	25710000	25711000	2000	3.30103	141	8.38544e-11	7.66596e-07	25709000	25710000	25710000	25711000	141	1	AT1G68500,AT1G68510,AT1G68520	AT1G68520
Chr1	11902000	11903000	Chr1	11903000	11904000	2000	3.30103	52	2.11985e-05	0.0191129	11902000	11903000	11903000	11904000	52	1	AT1G32850	AT1G32850
Chr1	28047000	28048000	Chr1	28048000	28049000	2000	3.30103	85	3.80635e-11	3.86556e-07	28047000	28048000	28048000	28049000	85	1	AT1G74650,AT1G74660	AT1G74660,AT1G74670
Chr1	4691000	4692000	Chr1	4692000	4693000	2000	3.30103	41	4.78623e-10	3.34413e-06	4691000	4692000	4692000	4693000	41	1	AT1G13670,AT1G13680	AT1G13680,AT1G13690,AT1G13700,AT1G13710
Chr1	858000	859000	Chr1	859000	860000	2000	3.30103	145	1.81244e-06	0.00288557	858000	859000	859000	860000	145	1	AT1G03445	AT1G03445,AT1G03457,AT1G03470,AT1G03475
Chr1	26029000	26030000	Chr1	26030000	26031000	2000	3.30103	123	5.03213e-09	2.46516e-05	26029000	26030000	26030000	26031000	123	1	AT1G69210,AT1G69220,AT1G69230,AT1G69240	AT1G69240,AT1G69250,AT1G69252,AT1G69260,AT1G69270
Chr1	28546000	28547000	Chr1	28547000	28548000	2000	3.30103	78	2.87174e-12	4.08647e-08	28546000	28547000	28547000	28548000	78	1	AT1G76030,AT1G76040,AT1G76050,AT1G76060,AT1G76065,AT1G76062,AT1G76070	AT1G76070,AT1G76080,AT1G76090,AT1G76100
Chr1	22981000	22982000	Chr1	22982000	22983000	2000	3.30103	278	2.34211e-07	0.000573093	22981000	22982000	22982000	22983000	278	1	AT1G62150,AT1G62160,AT1G62170,AT1G62180,AT1G62181,AT1G62190	AT1G62190,AT1G62200
Chr1	18305000	18306000	Chr1	18306000	18307000	2000	3.30103	76	2.34416e-10	1.84343e-06	18305000	18306000	18306000	18307000	76	1	AT1G49430,AT1G49435,AT1G49450	AT1G49450
Chr1	29467000	29468000	Chr1	29468000	29469000	2000	3.30103	84	8.21044e-09	3.72097e-05	29467000	29468000	29468000	29469000	84	1	AT1G78300,AT1G78310,AT1G78320	AT1G78320
Chr1	12744000	12745000	Chr1	12745000	12746000	2000	3.30103	81	9.18207e-07	0.00168659	12744000	12745000	12745000	12746000	81	1	AT1G34750,AT1G34760	AT1G34760,AT1G34770,AT1G34780,AT1G34844
Chr1	10710000	10711000	Chr1	10711000	10712000	2000	3.30103	102	5.15732e-10	3.55453e-06	10710000	10711000	10711000	10712000	102	1	AT1G30350	AT1G30350,AT1G30360,AT1G30370
Chr1	26318000	26319000	Chr1	26319000	26320000	2000	3.30103	198	9.00708e-08	0.00026518	26318000	26319000	26319000	26320000	198	1	AT1G69870	AT1G69870
Chr1	26309000	26310000	Chr1	26310000	26311000	2000	3.30103	52	5.65281e-05	0.0392114	26309000	26310000	26310000	26311000	52	1	AT1G69860	AT1G69860
Chr1	21533000	21534000	Chr1	21534000	21535000	2000	3.30103	94	3.94858e-06	0.00524614	21533000	21534000	21534000	21535000	94	1	AT1G58150,AT1G58160	AT1G58160
Chr1	21353000	21354000	Chr1	21354000	21355000	2000	3.30103	86	2.12879e-05	0.0191718	21353000	21354000	21354000	21355000	86	1	AT1G57650	AT1G57650,AT1G57660,AT1G57670
Chr1	29450000	29451000	Chr1	29451000	29452000	2000	3.30103	87	7.6362e-07	0.00145577	29450000	29451000	29451000	29452000	87	1	AT1G78250,AT1G78260,AT1G78270,AT1G78265	AT1G78270,AT1G78265,AT1G78280,AT1G78290
Chr1	28568000	28569000	Chr1	28569000	28570000	2000	3.30103	95	2.68496e-06	0.00391386	28568000	28569000	28569000	28570000	95	1	AT1G76135	AT1G76140,AT1G76150,AT1G76160
Chr1	2367000	2368000	Chr1	2368000	2369000	2000	3.30103	108	2.29682e-06	0.00346823	2367000	2368000	2368000	2369000	108	1	AT1G07650,AT1G07645	AT1G07645,AT1G07660,AT1G07670,AT1G07680,AT1G07690
Chr1	26000000	26001000	Chr1	26001000	26002000	2000	3.30103	80	3.55814e-09	1.84117e-05	26000000	26001000	26001000	26002000	80	1	AT1G69160	AT1G69160,AT1G69170,AT1G69180
Chr1	4211000	4212000	Chr1	4212000	4213000	2000	3.30103	26	3.28493e-07	0.000746487	4211000	4212000	4212000	4213000	26	1	AT1G12360,AT1G12370	AT1G12380,AT1G12390
Chr1	20048000	20049000	Chr1	20049000	20050000	2000	3.30103	225	4.71472e-07	0.000989999	20048000	20049000	20049000	20050000	225	1	AT1G53700	AT1G53700,AT1G53705,AT1G53708,AT1G53710,AT1G53720
Chr1	20793000	20794000	Chr1	20794000	20795000	2000	3.30103	77	3.88929e-05	0.0297674	20793000	20794000	20794000	20795000	77	1	AT1G55615,AT1G55620,AT1G55625,AT1G55630,AT1G55640	AT1G55640,AT1G55650
Chr1	8534000	8535000	Chr1	8535000	8536000	2000	3.30103	273	1.50376e-11	1.72419e-07	8534000	8535000	8535000	8536000	273	1	AT1G24095,AT1G24100,AT1G24110,AT1G24120,AT1G24130	AT1G24130,AT1G24140,AT1G24145
Chr1	29631000	29632000	Chr1	29632000	29633000	2000	3.30103	175	5.71095e-09	2.74703e-05	29631000	29632000	29632000	29633000	175	1	AT1G78780,AT1G78790,AT1G78800,AT1G78810,AT1G78815	AT1G78815,AT1G78820,AT1G78830,AT1G78840,AT1G78850
Chr1	4108000	4109000	Chr1	4109000	4110000	2000	3.30103	118	1.0618e-08	4.64052e-05	4108000	4109000	4109000	4110000	118	1	AT1G12110	AT1G12110
Chr1	7162000	7163000	Chr1	7163000	7164000	2000	3.30103	78	2.42e-06	0.00360343	7162000	7163000	7163000	7164000	78	1	AT1G20640,AT1G20650	AT1G20670
Chr1	13037000	13038000	Chr1	13038000	13039000	2000	3.30103	65	2.98491e-05	0.0244337	13037000	13038000	13038000	13039000	65	1	NA	NA
Chr1	5342000	5343000	Chr1	5343000	5344000	2000	3.30103	128	1.1913e-05	0.0123905	5342000	5343000	5343000	5344000	128	1	AT1G15520,AT1G15530,AT1G15540	AT1G15540,AT1G15550
Chr1	17014000	17015000	Chr1	17015000	17016000	2000	3.30103	73	2.77654e-05	0.0231803	17014000	17015000	17015000	17016000	73	1	AT1G45000,AT1G45010	AT1G45010,AT1G45015
Chr1	29372000	29373000	Chr1	29373000	29374000	2000	3.30103	46	2.66925e-05	0.0225923	29372000	29373000	29373000	29374000	46	1	NA	AT1G78090
Chr1	12657000	12658000	Chr1	12658000	12659000	2000	3.30103	168	7.7925e-05	0.0496161	12657000	12658000	12658000	12659000	168	1	AT1G34550,AT1G34560,AT1G34570,AT1G34575	AT1G34575
Chr1	23018000	23019000	Chr1	23019000	23020000	2000	3.30103	69	5.91029e-06	0.00716497	23018000	23019000	23019000	23020000	69	1	AT1G62280,AT1G62290,AT1G62300	AT1G62300,AT1G62301,AT1G62305
Chr1	17703000	17704000	Chr1	17704000	17705000	2000	3.30103	31	2.29429e-06	0.00346591	17703000	17704000	17704000	17705000	31	1	NA	AT1G48000,AT1G48010
Chr1	11925000	11926000	Chr1	11926000	11927000	2000	3.30103	136	2.89264e-11	3.05984e-07	11925000	11926000	11926000	11927000	136	1	AT1G32900,AT1G32910	AT1G32910,AT1G32920,AT1G32928
Chr1	4932000	4933000	Chr1	4933000	4934000	2000	3.30103	124	5.02245e-05	0.0359971	4932000	4933000	4933000	4934000	124	1	AT1G14390,AT1G14400,AT1G14410,AT1G14420	AT1G14420
Chr1	10693000	10694000	Chr1	10694000	10695000	2000	3.30103	90	4.36715e-07	0.000935607	10693000	10694000	10694000	10695000	90	1	NA	NA
Chr1	25167000	25168000	Chr1	25168000	25169000	2000	3.30103	118	1.29909e-07	0.000358413	25167000	25168000	25168000	25169000	118	1	AT1G67238,AT1G67250,AT1G67260	AT1G67260
Chr1	4936000	4937000	Chr1	4937000	4938000	2000	3.30103	64	2.49009e-05	0.0214983	4936000	4937000	4937000	4938000	64	1	AT1G14430	NA
Chr1	25533000	25534000	Chr1	25534000	25535000	2000	3.30103	118	2.75366e-05	0.0230491	25533000	25534000	25534000	25535000	118	1	AT1G68100,AT1G68110,AT1G68120,AT1G68130	AT1G68130,AT1G68140,AT1G68150
Chr1	25426000	25427000	Chr1	25427000	25428000	2000	3.30103	103	3.41188e-05	0.0269816	25426000	25427000	25427000	25428000	103	1	AT1G67785,AT1G67790,AT1G67792,AT1G67800,AT1G67810	AT1G67810,AT1G67820,AT1G67830,AT1G67840,AT1G67850
Chr1	26277000	26278000	Chr1	26278000	26279000	2000	3.30103	123	5.15057e-05	0.0366789	26277000	26278000	26278000	26279000	123	1	AT1G69800,AT1G69810	AT1G69810,AT1G69818,AT1G69820,AT1G69825,AT1G69828
Chr1	209000	210000	Chr1	210000	211000	2000	3.30103	93	6.3265e-07	0.00126231	209000	210000	210000	211000	93	1	AT1G01550,AT1G01560,AT1G01570,AT1G01580	AT1G01580,AT1G01590,AT1G01600
Chr1	26664000	26665000	Chr1	26665000	26666000	2000	3.30103	52	1.47286e-05	0.0145258	26664000	26665000	26665000	26666000	52	1	AT1G70700,AT1G70710	AT1G70720,AT1G70730,AT1G70740
Chr1	2173000	2174000	Chr1	2174000	2175000	2000	3.30103	137	5.63774e-05	0.0391567	2173000	2174000	2174000	2175000	137	1	AT1G07040,AT1G07050,AT1G07051,AT1G07060,AT1G07070,AT1G07080,AT1G07090	AT1G07090,AT1G07100,AT1G07110,AT1G07119,AT1G07120
Chr1	29250000	29251000	Chr1	29251000	29252000	2000	3.30103	158	9.47041e-10	5.99742e-06	29250000	29251000	29251000	29252000	158	1	AT1G77765,AT1G77770,AT1G77780,AT1G77790	AT1G77790,AT1G77800,AT1G77810
Chr1	8073000	8074000	Chr1	8074000	8075000	2000	3.30103	148	7.06429e-05	0.0462242	8073000	8074000	8074000	8075000	148	1	AT1G22770,AT1G22780,AT1G22790,AT1G22800	AT1G22800,AT1G22810,AT1G22830,AT1G22840,AT1G22850,AT1G22860
Chr1	22008000	22009000	Chr1	22009000	22010000	2000	3.30103	80	3.06298e-05	0.0249182	22008000	22009000	22009000	22010000	80	1	AT1G59790,AT1G59800,AT1G59810	AT1G59810,AT1G59820
Chr1	4286000	4287000	Chr1	4287000	4288000	2000	3.30103	117	1.38462e-07	0.000376792	4286000	4287000	4287000	4288000	117	1	AT1G12560,AT1G12570,AT1G12580,AT1G12590,AT1G12600	AT1G12600,AT1G12610,AT1G12620
Chr1	26396000	26397000	Chr1	26397000	26398000	2000	3.30103	125	4.89137e-05	0.0352903	26396000	26397000	26397000	26398000	125	1	AT1G70070,AT1G70080	AT1G70080,AT1G70090,AT1G70100,AT1G70110
Chr1	5955000	5956000	Chr1	5956000	5957000	2000	3.30103	52	2.71663e-05	0.0228196	5955000	5956000	5956000	5957000	52	1	AT1G17360,AT1G17370,AT1G17380	AT1G17380,AT1G17400
Chr1	177000	178000	Chr1	178000	179000	2000	3.30103	72	1.03332e-06	0.00186015	177000	178000	178000	179000	72	1	AT1G01480	AT1G01480,AT1G01490,AT1G01500,AT1G01510
Chr1	28893000	28894000	Chr1	28894000	28895000	2000	3.30103	64	6.42992e-05	0.0431361	28893000	28894000	28894000	28895000	64	1	AT1G76920	AT1G76930,AT1G76940
Chr1	175000	176000	Chr1	176000	177000	2000	3.30103	44	5.78108e-09	2.7724e-05	175000	176000	176000	177000	44	1	AT1G01470,AT1G01471,AT1G01480	AT1G01480
Chr1	23224000	23225000	Chr1	23225000	23226000	2000	3.30103	161	8.32192e-09	3.76792e-05	23224000	23225000	23225000	23226000	161	1	AT1G62700,AT1G62710	AT1G62710,AT1G62720,AT1G62730,AT1G62740,AT1G62750
Chr1	22619000	22620000	Chr1	22620000	22621000	2000	3.30103	77	2.57388e-05	0.0219953	22619000	22620000	22620000	22621000	77	1	AT1G61310,AT1G61320	AT1G61330,AT1G61340
Chr1	365000	366000	Chr1	366000	367000	2000	3.30103	222	1.84804e-13	3.71512e-09	365000	366000	366000	367000	222	1	AT1G02030,AT1G02040,AT1G02050,AT1G02060,AT1G02065	AT1G02065,AT1G02070,AT1G02074,AT1G02080
Chr1	1237000	1238000	Chr1	1238000	1239000	2000	3.30103	225	1.134e-07	0.000320637	1237000	1238000	1238000	1239000	225	1	AT1G04510,AT1G04520,AT1G04530,AT1G04540	AT1G04540,AT1G04550,AT1G04555,AT1G04560,AT1G04570
Chr1	6315000	6316000	Chr1	6316000	6317000	2000	3.30103	134	6.80544e-06	0.00800063	6315000	6316000	6316000	6317000	134	1	AT1G18335,AT1G18340,AT1G18350	AT1G18350,AT1G18360,AT1G18370,AT1G18382
Chr1	5274000	5275000	Chr1	5275000	5276000	2000	3.30103	323	3.78674e-07	0.000838602	5274000	5275000	5275000	5276000	323	1	AT1G15290,AT1G15310,AT1G15320,AT1G15330	AT1G15330,AT1G15340,AT1G15350
Chr1	29810000	29811000	Chr1	29811000	29812000	2000	3.30103	119	1.81519e-08	7.22039e-05	29810000	29811000	29811000	29812000	119	1	AT1G79220,AT1G79230,AT1G79240,AT1G79250	AT1G79250,AT1G79260,AT1G79270,AT1G79280
Chr1	24543000	24544000	Chr1	24544000	24545000	2000	3.30103	73	1.2279e-05	0.0126774	24543000	24544000	24544000	24545000	73	1	AT1G65930	AT1G65950,AT1G65960
Chr1	7174000	7175000	Chr1	7175000	7176000	2000	3.30103	116	4.05083e-05	0.0306075	7174000	7175000	7175000	7176000	116	1	AT1G20680,AT1G20690,AT1G20691	AT1G20690,AT1G20691,AT1G20693,AT1G20696,AT1G20700,AT1G20710
Chr1	21056000	21057000	Chr1	21057000	21058000	2000	3.30103	36	1.9019e-05	0.0176196	21056000	21057000	21057000	21058000	36	1	AT1G56230,AT1G56233,AT1G56240,AT1G56242	AT1G56240,AT1G56242
Chr1	21718000	21719000	Chr1	21719000	21720000	2000	3.30103	98	9.9169e-08	0.000287093	21718000	21719000	21719000	21720000	98	1	AT1G58430,AT1G58440,AT1G58450	AT1G58460,AT1G58470
Chr1	11865000	11866000	Chr1	11866000	11867000	2000	3.30103	83	2.85638e-05	0.0236715	11865000	11866000	11866000	11867000	83	1	AT1G32770	AT1G32770
Chr1	7895000	7896000	Chr1	7896000	7897000	2000	3.30103	58	2.44333e-07	0.000592758	7895000	7896000	7896000	7897000	58	1	AT1G22360	AT1G22360,AT1G22370,AT1G22380,AT1G22400
Chr1	30370000	30371000	Chr1	30371000	30372000	2000	3.30103	118	6.61045e-06	0.00782528	30370000	30371000	30371000	30372000	118	1	AT1G80790,AT1G80810,AT1G80820	AT1G80820
Chr1	6624000	6625000	Chr1	6625000	6626000	2000	3.30103	78	2.66767e-05	0.0225829	6624000	6625000	6625000	6626000	78	1	AT1G19190	AT1G19200,AT1G19210
Chr1	26172000	26173000	Chr1	26173000	26174000	2000	3.30103	76	1.08637e-05	0.0115376	26172000	26173000	26173000	26174000	76	1	AT1G69570,AT1G69572,AT1G69580	AT1G69580,AT1G69587,AT1G69588,AT1G69600
Chr1	557000	558000	Chr1	558000	559000	2000	3.30103	120	5.98319e-16	2.46613e-11	557000	558000	558000	559000	120	1	AT1G02610,AT1G02620	AT1G02630,AT1G02640
Chr1	22870000	22871000	Chr1	22871000	22872000	2000	3.30103	40	2.30318e-05	0.0203288	22870000	22871000	22871000	22872000	40	1	AT1G61850,AT1G61860,AT1G61870,AT1G61880,AT1G61890	AT1G61890
Chr1	28433000	28434000	Chr1	28434000	28435000	2000	3.30103	106	4.52677e-06	0.00582602	28433000	28434000	28434000	28435000	106	1	AT1G75690,AT1G75700,AT1G75710,AT1G75717	AT1G75717,AT1G75720,AT1G75730,AT1G75740,AT1G75750
Chr1	26216000	26217000	Chr1	26217000	26218000	2000	3.30103	129	8.63033e-13	1.44279e-08	26216000	26217000	26217000	26218000	129	1	AT1G69690	AT1G69690
Chr1	30351000	30352000	Chr1	30352000	30353000	2000	3.30103	136	5.60159e-05	0.0389622	30351000	30352000	30352000	30353000	136	1	AT1G80750,AT1G80760	AT1G80760,AT1G80770,AT1G80780
Chr1	4231000	4232000	Chr1	4232000	4233000	2000	3.30103	77	3.40206e-07	0.000768721	4231000	4232000	4232000	4233000	77	1	AT1G12400,AT1G12410,AT1G12411,AT1G12420,AT1G12423	AT1G12430,AT1G12440
Chr1	19907000	19908000	Chr1	19908000	19909000	2000	3.30103	123	4.58622e-06	0.00587973	19907000	19908000	19908000	19909000	123	1	AT1G53330,AT1G53340,AT1G53345,AT1G53350,AT1G53360	AT1G53360,AT1G53366,AT1G53370,AT1G53380
Chr1	575000	576000	Chr1	576000	577000	2000	3.30103	41	2.28216e-06	0.00345194	575000	576000	576000	577000	41	1	AT1G02650,AT1G02660	AT1G02670
Chr2	3377000	3378000	Chr2	3378000	3379000	2000	3.30103	63	1.82411e-34	8.72154e-29	3375000	3378000	3376000	3379000	153	0.666667	NA	NA
Chr2	3332000	3333000	Chr2	3333000	3334000	2000	3.30103	36	2.18974e-22	3.27178e-17	3331000	3335000	3333000	3336000	145	0.5	AT2G07792	NA
Chr2	3486000	3487000	Chr2	3487000	3488000	2000	3.30103	22	7.30221e-15	2.09065e-10	3485000	3489000	3487000	3490000	77	0.5	AT2G07806	AT2G07806
Chr2	3490000	3491000	Chr2	3491000	3492000	2000	3.30103	23	3.11489e-11	3.25888e-07	3490000	3493000	3491000	3494000	78	0.555556	NA	NA
Chr2	3500000	3501000	Chr2	3501000	3502000	2000	3.30103	11	2.65143e-08	9.75917e-05	3497000	3501000	3500000	3502000	40	0.625	NA	AT2G07835,AT2G07741,AT2G07766
Chr2	18805000	18806000	Chr2	18806000	18807000	2000	3.30103	57	1.20656e-07	0.000337361	18803000	18806000	18805000	18807000	181	0.666667	AT2G45620,AT2G45630,AT2G45640,AT2G45650	AT2G45650
Chr2	3398000	3399000	Chr2	3399000	3400000	2000	3.30103	104	4.19558e-93	1.00301e-86	3397000	3399000	3399000	3401000	132	0.75	NA	AT2G07713,AT2G07714
Chr2	18727000	18728000	Chr2	18728000	18729000	2000	3.30103	226	1.25339e-15	4.57463e-11	18727000	18729000	18728000	18731000	437	0.5	AT2G45430	AT2G45430,AT2G45434,AT2G45440,AT2G45450,AT2G45460
Chr2	9211000	9212000	Chr2	9212000	9213000	2000	3.30103	60	1.3044e-06	0.00223777	9210000	9212000	9212000	9213000	97	1	AT2G21510	AT2G21510,AT2G21520,AT2G21530
Chr2	8520000	8521000	Chr2	8521000	8522000	2000	3.30103	133	1.07706e-09	6.65339e-06	8519000	8521000	8521000	8522000	193	1	AT2G19720,AT2G19730,AT2G19740,AT2G19750,AT2G19760,AT2G19770	AT2G19770,AT2G19780
Chr2	19133000	19134000	Chr2	19134000	19135000	2000	3.30103	94	1.09292e-09	6.70821e-06	19133000	19135000	19134000	19136000	175	0.5	AT2G46560,AT2G46567,AT2G46570,AT2G46572,AT2G46580,AT2G46590	AT2G46590,AT2G46600,AT2G46610
Chr2	9717000	9718000	Chr2	9718000	9719000	2000	3.30103	114	3.19892e-05	0.0257399	9717000	9719000	9718000	9720000	225	0.5	AT2G22807,AT2G22810	AT2G22810,AT2G22820,AT2G22821,AT2G22830
Chr2	1143000	1144000	Chr2	1144000	1145000	2000	3.30103	38	2.75462e-06	0.00399593	1143000	1144000	1144000	1146000	77	1	AT2G03730,AT2G03740	AT2G03750,AT2G03760,AT2G03770,AT2G03780,AT2G03790
Chr2	9684000	9685000	Chr2	9685000	9686000	2000	3.30103	56	8.30208e-07	0.00155603	9684000	9686000	9685000	9687000	102	0.5	AT2G22770	AT2G22770,AT2G22780
Chr2	1008000	1009000	Chr2	1009000	1010000	2000	3.30103	83	3.34289e-09	1.74109e-05	1007000	1009000	1009000	1010000	131	1	AT2G03310,AT2G03320,AT2G03330	AT2G03330,AT2G03340
Chr2	18913000	18914000	Chr2	18914000	18915000	2000	3.30103	193	2.03511e-12	3.02186e-08	18912000	18914000	18913000	18915000	297	0.5	AT2G45940,AT2G45950,AT2G45960,AT2G45970	AT2G45970,AT2G45980,AT2G45990,AT2G46000,AT2G46020
Chr2	16011000	16012000	Chr2	16012000	16013000	2000	3.30103	63	6.05323e-10	4.10526e-06	16011000	16013000	16012000	16014000	154	0.5	AT2G38185,AT2G38195,AT2G38210,AT2G38220,AT2G38230	AT2G38230,AT2G38240
Chr2	432000	433000	Chr2	433000	434000	2000	3.30103	38	2.03821e-05	0.0185906	432000	433000	433000	435000	65	1	AT2G01913,AT2G01918,AT2G01920,AT2G01930,AT2G01940	AT2G01940,AT2G01950
Chr2	3313000	3314000	Chr2	3314000	3315000	2000	3.30103	52	1.61438e-18	1.15206e-13	3313000	3315000	3314000	3316000	75	0.5	AT2G07687	NA
Chr2	13655000	13656000	Chr2	13656000	13657000	2000	3.30103	95	4.07338e-05	0.0307336	13654000	13656000	13656000	13657000	139	1	AT2G32090,AT2G32100,AT2G32110,AT2G32120,AT2G32130,AT2G32140	AT2G32140,AT2G32150
Chr2	6709000	6710000	Chr2	6710000	6711000	2000	3.30103	78	5.34294e-05	0.0376951	6709000	6710000	6710000	6711000	78	1	AT2G15390	AT2G15390
Chr2	18961000	18962000	Chr2	18962000	18963000	2000	3.30103	91	9.74513e-06	0.0105847	18961000	18962000	18962000	18963000	91	1	AT2G46150	AT2G46150,AT2G46160,AT2G46170,AT2G46180,AT2G46190
Chr2	17264000	17265000	Chr2	17265000	17266000	2000	3.30103	96	3.7661e-06	0.00505381	17264000	17265000	17265000	17266000	96	1	AT2G41410,AT2G41415	AT2G41415,AT2G41420,AT2G41430
Chr2	17138000	17139000	Chr2	17139000	17140000	2000	3.30103	120	4.31622e-23	6.87899e-18	17138000	17139000	17139000	17140000	120	1	AT2G41060,AT2G41070,AT2G41080,AT2G41082,AT2G41090,AT2G41100	AT2G41100,AT2G41110
Chr2	10827000	10828000	Chr2	10828000	10829000	2000	3.30103	227	4.89505e-12	6.50125e-08	10827000	10828000	10828000	10829000	227	1	AT2G25430,AT2G25440	AT2G25440,AT2G25450
Chr2	10011000	10012000	Chr2	10012000	10013000	2000	3.30103	91	7.75248e-08	0.000234599	10011000	10012000	10012000	10013000	91	1	AT2G23510	AT2G23510,AT2G23520
Chr2	15231000	15232000	Chr2	15232000	15233000	2000	3.30103	77	1.31955e-05	0.0134036	15231000	15232000	15232000	15233000	77	1	AT2G36310,AT2G36320,AT2G36325	AT2G36325,AT2G36330,AT2G36340,AT2G36350,AT2G36355,AT2G36360
Chr2	9267000	9268000	Chr2	9268000	9269000	2000	3.30103	85	1.94288e-05	0.0179134	9267000	9268000	9268000	9269000	85	1	AT2G21650,AT2G21655,AT2G21660,AT2G21670,AT2G21680	AT2G21680,AT2G21690,AT2G21700,AT2G21710,AT2G21720,AT2G21725,AT2G21727
Chr2	1640000	1641000	Chr2	1641000	1642000	2000	3.30103	148	1.09392e-08	4.74118e-05	1640000	1641000	1641000	1642000	148	1	AT2G04675,AT2G04680	AT2G04680,AT2G04690,AT2G04700
Chr2	13169000	13170000	Chr2	13170000	13171000	2000	3.30103	101	2.04976e-06	0.00317213	13169000	13170000	13170000	13171000	101	1	AT2G30925,AT2G30930,AT2G30933,AT2G30940	AT2G30940,AT2G30942,AT2G30945,AT2G30950,AT2G30960,AT2G30970
Chr2	9488000	9489000	Chr2	9489000	9490000	2000	3.30103	170	1.58405e-13	3.25054e-09	9488000	9489000	9489000	9490000	170	1	AT2G22310,AT2G22320,AT2G22330	AT2G22330,AT2G22340,AT2G22345,AT2G22360
Chr2	19180000	19181000	Chr2	19181000	19182000	2000	3.30103	24	2.59111e-08	9.61113e-05	19180000	19181000	19181000	19182000	24	1	AT2G46685,AT2G46690	AT2G46690,AT2G46700
Chr2	11809000	11810000	Chr2	11810000	11811000	2000	3.30103	65	1.7099e-05	0.0163151	11809000	11810000	11810000	11811000	65	1	AT2G27690	AT2G27690
Chr2	1989000	1990000	Chr2	1990000	1991000	2000	3.30103	90	1.53054e-06	0.00252342	1989000	1990000	1990000	1991000	90	1	NA	NA
Chr2	13135000	13136000	Chr2	13136000	13137000	2000	3.30103	167	1.38713e-05	0.0139157	13135000	13136000	13136000	13137000	167	1	AT2G30840	AT2G30840,AT2G30850,AT2G30860,AT2G30870
Chr2	10049000	10050000	Chr2	10050000	10051000	2000	3.30103	69	4.71943e-05	0.0342878	10049000	10050000	10050000	10051000	69	1	AT2G23620	NA
Chr2	18314000	18315000	Chr2	18315000	18316000	2000	3.30103	63	1.38059e-05	0.0138675	18314000	18315000	18315000	18316000	63	1	AT2G44340	AT2G44350
Chr2	13766000	13767000	Chr2	13767000	13768000	2000	3.30103	45	2.22625e-05	0.0198033	13766000	13767000	13767000	13768000	45	1	AT2G32400,AT2G32410,AT2G32415	NA
Chr2	8532000	8533000	Chr2	8533000	8534000	2000	3.30103	55	2.55227e-11	2.74226e-07	8532000	8533000	8533000	8534000	55	1	AT2G19790,AT2G19796,AT2G19800	AT2G19800,AT2G19802
Chr2	17208000	17209000	Chr2	17209000	17210000	2000	3.30103	59	4.09079e-05	0.030826	17208000	17209000	17209000	17210000	59	1	AT2G41250,AT2G41260	AT2G41280,AT2G41290,AT2G41300
Chr2	8115000	8116000	Chr2	8116000	8117000	2000	3.30103	157	4.38273e-10	3.13697e-06	8115000	8116000	8116000	8117000	157	1	AT2G18720	AT2G18720,AT2G18721,AT2G18730,AT2G18735,AT2G18740,AT2G18750
Chr2	13703000	13704000	Chr2	13704000	13705000	2000	3.30103	64	5.49054e-05	0.0384359	13703000	13704000	13704000	13705000	64	1	AT2G32250,AT2G32260	AT2G32270,AT2G32273,AT2G32275,AT2G32280,AT2G32290
Chr2	15162000	15163000	Chr2	15163000	15164000	2000	3.30103	131	2.08927e-05	0.0189157	15162000	15163000	15163000	15164000	131	1	AT2G36110	AT2G36120,AT2G36130
Chr2	1059000	1060000	Chr2	1060000	1061000	2000	3.30103	98	2.89534e-05	0.0239043	1059000	1060000	1060000	1061000	98	1	AT2G03480,AT2G03490,AT2G03500	AT2G03500
Chr2	18039000	18040000	Chr2	18040000	18041000	2000	3.30103	132	5.84734e-10	3.98257e-06	18039000	18040000	18040000	18041000	132	1	AT2G43410,AT2G43420,AT2G43430,AT2G43440	AT2G43440,AT2G43445,AT2G43450,AT2G43460,AT2G43465,AT2G43470
Chr2	12620000	12621000	Chr2	12621000	12622000	2000	3.30103	83	2.41309e-06	0.00359876	12620000	12621000	12621000	12622000	83	1	AT2G29430,AT2G29440	AT2G29440
Chr2	6517000	6518000	Chr2	6518000	6519000	2000	3.30103	40	9.99903e-06	0.0108016	6517000	6518000	6518000	6519000	40	1	NA	AT2G15050
Chr2	7296000	7297000	Chr2	7297000	7298000	2000	3.30103	142	1.92379e-06	0.00302571	7296000	7297000	7297000	7298000	142	1	AT2G16800,AT2G16810,AT2G16835	AT2G16850,AT2G16860
Chr2	3364000	3365000	Chr2	3365000	3366000	2000	3.30103	13	9.836e-12	1.16696e-07	3364000	3365000	3365000	3366000	13	1	AT2G07698,AT2G07667	AT2G07667
Chr2	9746000	9747000	Chr2	9747000	9748000	2000	3.30103	21	3.45184e-05	0.027248	9746000	9747000	9747000	9748000	21	1	AT2G22900	AT2G22905,AT2G22910
Chr2	19647000	19648000	Chr2	19648000	19649000	2000	3.30103	96	2.79533e-06	0.00403295	19647000	19648000	19648000	19649000	96	1	AT2G47990,AT2G48000,AT2G48010,AT2G48020,AT2G48030	AT2G48030,AT2G48060
Chr2	9061000	9062000	Chr2	9062000	9063000	2000	3.30103	117	7.45109e-05	0.048	9061000	9062000	9062000	9063000	117	1	AT2G21120,AT2G21130,AT2G21140	AT2G21140,AT2G21150,AT2G21160,AT2G21170
Chr2	17365000	17366000	Chr2	17366000	17367000	2000	3.30103	116	2.57153e-09	1.38615e-05	17365000	17366000	17366000	17367000	116	1	AT2G41630,AT2G41640,AT2G41650	AT2G41660
Chr2	19485000	19486000	Chr2	19486000	19487000	2000	3.30103	65	8.66426e-10	5.57552e-06	19485000	19486000	19486000	19487000	65	1	AT2G47480,AT2G47485	AT2G47485,AT2G47490,AT2G47500
Chr2	12105000	12106000	Chr2	12106000	12107000	2000	3.30103	98	2.65382e-06	0.00388505	12105000	12106000	12106000	12107000	98	1	AT2G28340	AT2G28340
Chr2	1130000	1131000	Chr2	1131000	1132000	2000	3.30103	96	1.63832e-05	0.0157992	1130000	1131000	1131000	1132000	96	1	AT2G03710	AT2G03710,AT2G03720
Chr2	12579000	12580000	Chr2	12580000	12581000	2000	3.30103	143	1.62267e-07	0.000425818	12579000	12580000	12580000	12581000	143	1	AT2G29250	AT2G29250
Chr2	15002000	15003000	Chr2	15003000	15004000	2000	3.30103	159	6.87107e-05	0.0453511	15002000	15003000	15003000	15004000	159	1	AT2G35670,AT2G35680,AT2G35690	AT2G35690,AT2G35700,AT2G35710
Chr2	259000	260000	Chr2	260000	261000	2000	3.30103	28	1.43128e-06	0.00239461	259000	260000	260000	261000	28	1	AT2G01570	NA
Chr2	19624000	19625000	Chr2	19625000	19626000	2000	3.30103	77	5.59507e-06	0.00687522	19624000	19625000	19625000	19626000	77	1	AT2G47920,AT2G47930,AT2G47940,AT2G47950	AT2G47960,AT2G47970,AT2G47980
Chr2	15110000	15111000	Chr2	15111000	15112000	2000	3.30103	137	5.44765e-09	2.63897e-05	15110000	15111000	15111000	15112000	137	1	AT2G35970,AT2G35980	AT2G35980,AT2G35990,AT2G36000,AT2G36010
Chr2	18188000	18189000	Chr2	18189000	18190000	2000	3.30103	63	9.48649e-07	0.00172988	18188000	18189000	18189000	18190000	63	1	AT2G43890,AT2G43900,AT2G43910	AT2G43920,AT2G43930,AT2G43940,AT2G43945
Chr2	17647000	17648000	Chr2	17648000	17649000	2000	3.30103	51	7.71154e-05	0.0492137	17647000	17648000	17648000	17649000	51	1	AT2G42340,AT2G42350,AT2G42360,AT2G42365,AT2G42370,AT2G42380	AT2G42380,AT2G42388,AT2G42390,AT2G42395,AT2G42400
Chr2	12563000	12564000	Chr2	12564000	12565000	2000	3.30103	124	3.29803e-05	0.0263075	12563000	12564000	12564000	12565000	124	1	AT2G29220	AT2G29220
Chr2	19198000	19199000	Chr2	19199000	19200000	2000	3.30103	26	6.72827e-05	0.04468	19198000	19199000	19199000	19200000	26	1	AT2G46710,AT2G46720	AT2G46720
Chr2	13768000	13769000	Chr2	13769000	13770000	2000	3.30103	86	2.56979e-05	0.0219761	13768000	13769000	13769000	13770000	86	1	NA	AT2G32430,AT2G32440,AT2G32450
Chr2	19417000	19418000	Chr2	19418000	19419000	2000	3.30103	160	2.99832e-05	0.0245021	19417000	19418000	19418000	19419000	160	1	AT2G47275,AT2G47280	AT2G47280,AT2G47300,AT2G47310
Chr2	14633000	14634000	Chr2	14634000	14635000	2000	3.30103	92	2.14527e-07	0.00053478	14633000	14634000	14634000	14635000	92	1	AT2G34680,AT2G34690	AT2G34700,AT2G34710
Chr2	3394000	3395000	Chr2	3395000	3396000	2000	3.30103	7	1.80319e-05	0.0169558	3394000	3395000	3395000	3396000	7	1	NA	NA
Chr2	291000	292000	Chr2	292000	293000	2000	3.30103	83	4.10825e-07	0.000895288	291000	292000	292000	293000	83	1	AT2G01660	AT2G01660
Chr2	17462000	17463000	Chr2	17463000	17464000	2000	3.30103	108	5.14851e-05	0.0366755	17462000	17463000	17463000	17464000	108	1	AT2G41830,AT2G41835,AT2G41840,AT2G41850	AT2G41850,AT2G41860,AT2G41870
Chr2	9822000	9823000	Chr2	9823000	9824000	2000	3.30103	40	5.86024e-05	0.0402635	9822000	9823000	9823000	9824000	40	1	AT2G23060,AT2G23067	AT2G23070,AT2G23080,AT2G23090
Chr2	7078000	7079000	Chr2	7079000	7080000	2000	3.30103	56	5.42392e-06	0.00670801	7078000	7079000	7079000	7080000	56	1	AT2G16340,AT2G16365,AT2G16360	AT2G16365
Chr2	6564000	6565000	Chr2	6565000	6566000	2000	3.30103	106	3.73987e-09	1.92272e-05	6564000	6565000	6565000	6566000	106	1	AT2G15110,AT2G15128,AT2G15130	AT2G15130
Chr2	12289000	12290000	Chr2	12290000	12291000	2000	3.30103	65	5.01308e-05	0.0359407	12289000	12290000	12290000	12291000	65	1	AT2G28640,AT2G28650	AT2G28650,AT2G28660
Chr2	879000	880000	Chr2	880000	881000	2000	3.30103	67	2.40887e-05	0.0209712	879000	880000	880000	881000	67	1	AT2G03010	AT2G03010
Chr2	19296000	19297000	Chr2	19297000	19298000	2000	3.30103	28	1.21534e-06	0.00211227	19296000	19297000	19297000	19298000	28	1	AT2G46930,AT2G46940,AT2G46950,AT2G46960,AT2G46970	AT2G46970,AT2G46980,AT2G46990
Chr2	11174000	11175000	Chr2	11175000	11176000	2000	3.30103	162	6.36643e-05	0.0428223	11174000	11175000	11175000	11176000	162	1	NA	AT2G26260
Chr2	3337000	3338000	Chr2	3338000	3339000	2000	3.30103	37	1.04313e-22	1.60886e-17	3337000	3338000	3338000	3339000	37	1	NA	AT2G07691
Chr2	17920000	17921000	Chr2	17921000	17922000	2000	3.30103	116	3.74862e-08	0.000130255	17920000	17921000	17921000	17922000	116	1	AT2G43080,AT2G43090,AT2G43100	AT2G43100,AT2G43110,AT2G43137,AT2G43138,AT2G43139,AT2G43141
Chr2	1079000	1080000	Chr2	1080000	1081000	2000	3.30103	87	4.45247e-10	3.17737e-06	1079000	1080000	1080000	1081000	87	1	AT2G03550,AT2G03560	AT2G03560
Chr2	13632000	13633000	Chr2	13633000	13634000	2000	3.30103	64	7.17052e-09	3.32533e-05	13632000	13633000	13633000	13634000	64	1	AT2G32010,AT2G32020,AT2G32030	AT2G32030,AT2G32040,AT2G32050,AT2G32060,AT2G32070,AT2G32080
Chr2	11364000	11365000	Chr2	11365000	11366000	2000	3.30103	95	2.05753e-06	0.00317854	11364000	11365000	11365000	11366000	95	1	NA	AT2G26695
Chr2	18369000	18370000	Chr2	18370000	18371000	2000	3.30103	45	7.53303e-06	0.00866635	18369000	18370000	18370000	18371000	45	1	AT2G44490	NA
Chr2	14393000	14394000	Chr2	14394000	14395000	2000	3.30103	85	7.56862e-08	0.000230054	14393000	14394000	14394000	14395000	85	1	AT2G34050,AT2G34060,AT2G34070,AT2G34110,AT2G34080	AT2G34110,AT2G34080
Chr2	8544000	8545000	Chr2	8545000	8546000	2000	3.30103	78	3.675e-07	0.000819549	8544000	8545000	8545000	8546000	78	1	NA	NA
Chr2	16867000	16868000	Chr2	16868000	16869000	2000	3.30103	117	1.14344e-15	4.33896e-11	16867000	16868000	16868000	16869000	117	1	AT2G40380,AT2G40390	AT2G40390,AT2G40400,AT2G40410
Chr2	12199000	12200000	Chr2	12200000	12201000	2000	3.30103	62	9.00294e-07	0.00165942	12199000	12200000	12200000	12201000	62	1	AT2G28510	AT2G28510
Chr2	273000	274000	Chr2	274000	275000	2000	3.30103	84	1.03251e-06	0.00185989	273000	274000	274000	275000	84	1	AT2G01610	AT2G01610,AT2G01620,AT2G01630
Chr2	4019000	4020000	Chr2	4020000	4021000	2000	3.30103	97	2.72439e-06	0.00396172	4019000	4020000	4020000	4021000	97	1	NA	AT2G10450
Chr2	9563000	9564000	Chr2	9564000	9565000	2000	3.30103	59	4.88151e-09	2.40121e-05	9563000	9564000	9564000	9565000	59	1	AT2G22490,AT2G22496,AT2G22500	AT2G22500,AT2G22510,AT2G22520,AT2G22530
Chr2	19149000	19150000	Chr2	19150000	19151000	2000	3.30103	158	7.34599e-12	9.21866e-08	19149000	19150000	19150000	19151000	158	1	AT2G46640	AT2G46640,AT2G46650
Chr2	507000	508000	Chr2	508000	509000	2000	3.30103	105	1.96825e-11	2.19364e-07	507000	508000	508000	509000	105	1	AT2G02070	AT2G02070
Chr2	19432000	19433000	Chr2	19433000	19434000	2000	3.30103	35	3.85954e-05	0.0296013	19432000	19433000	19433000	19434000	35	1	AT2G47320,AT2G47330,AT2G47340	AT2G47340,AT2G47350,AT2G47360,AT2G47370,AT2G47380,AT2G47390
Chr2	17931000	17932000	Chr2	17932000	17933000	2000	3.30103	40	1.34342e-06	0.00227975	17931000	17932000	17932000	17933000	40	1	AT2G43120,AT2G43130,AT2G43140	AT2G43140
Chr2	3264000	3265000	Chr2	3265000	3266000	2000	3.30103	6	7.44155e-06	0.00857906	3264000	3265000	3265000	3266000	6	1	AT2G07779,AT2G07743,AT2G07672,AT2G07684	NA
Chr2	6031000	6032000	Chr2	6032000	6033000	2000	3.30103	214	5.40746e-11	5.19166e-07	6031000	6032000	6032000	6033000	214	1	NA	AT2G14247,AT2G14255,AT2G14260
Chr2	19144000	19145000	Chr2	19145000	19146000	2000	3.30103	107	6.86764e-08	0.000213776	19144000	19145000	19145000	19146000	107	1	AT2G46620	AT2G46630
Chr2	14575000	14576000	Chr2	14576000	14577000	2000	3.30103	102	7.29507e-07	0.00141042	14575000	14576000	14576000	14577000	102	1	AT2G34580,AT2G34585,AT2G34590,AT2G34600,AT2G34610	AT2G34610,AT2G34620,AT2G34630
Chr2	10066000	10067000	Chr2	10067000	10068000	2000	3.30103	54	2.20737e-06	0.00336115	10066000	10067000	10067000	10068000	54	1	AT2G23670,AT2G23672,AT2G23680	AT2G23680
Chr2	14536000	14537000	Chr2	14537000	14538000	2000	3.30103	226	2.65379e-05	0.0224893	14536000	14537000	14537000	14538000	226	1	AT2G34440,AT2G34450,AT2G34460,AT2G34470,AT2G34480,AT2G34490	AT2G34490,AT2G34500,AT2G34510,AT2G34520
Chr2	16782000	16783000	Chr2	16783000	16784000	2000	3.30103	143	3.93932e-07	0.000866769	16782000	16783000	16783000	16784000	143	1	AT2G40140,AT2G40150,AT2G40160,AT2G40170,AT2G40180	AT2G40180,AT2G40190
Chr2	15153000	15154000	Chr2	15154000	15155000	2000	3.30103	41	3.91644e-05	0.0299321	15153000	15154000	15154000	15155000	41	1	AT2G36080	NA
Chr2	13372000	13373000	Chr2	13373000	13374000	2000	3.30103	33	1.18508e-06	0.00206871	13372000	13373000	13373000	13374000	33	1	AT2G31340,AT2G31345,AT2G31350,AT2G31360	AT2G31360
Chr2	15517000	15518000	Chr2	15518000	15519000	2000	3.30103	27	3.1275e-06	0.0043813	15517000	15518000	15518000	15519000	27	1	AT2G36950	NA
Chr2	17190000	17191000	Chr2	17191000	17192000	2000	3.30103	50	6.51999e-05	0.0435388	17190000	17191000	17191000	17192000	50	1	AT2G41220	AT2G41225,AT2G41230,AT2G41231,AT2G41233,AT2G41240
Chr2	15772000	15773000	Chr2	15773000	15774000	2000	3.30103	58	1.88183e-05	0.0175049	15772000	15773000	15773000	15774000	58	1	AT2G37570,AT2G37580,AT2G37585,AT2G37590	AT2G37600,AT2G37610,AT2G37620,AT2G37630
Chr2	19505000	19506000	Chr2	19506000	19507000	2000	3.30103	90	2.05194e-05	0.0186746	19505000	19506000	19506000	19507000	90	1	AT2G47510,AT2G47520,AT2G47530,AT2G47540	AT2G47540,AT2G47550,AT2G47560,AT2G47570
Chr2	16562000	16563000	Chr2	16563000	16564000	2000	3.30103	99	1.18484e-09	7.17998e-06	16562000	16563000	16563000	16564000	99	1	AT2G39705,AT2G39710	AT2G39710,AT2G39720,AT2G39725,AT2G39730
Chr2	10111000	10112000	Chr2	10112000	10113000	2000	3.30103	59	3.24383e-05	0.0259792	10111000	10112000	10112000	10113000	59	1	AT2G23760	AT2G23760,AT2G23770
Chr2	18310000	18311000	Chr2	18311000	18312000	2000	3.30103	89	6.73882e-06	0.00793793	18310000	18311000	18311000	18312000	89	1	AT2G44290,AT2G44300,AT2G44304,AT2G44310,AT2G44320,AT2G44330	AT2G44330
Chr2	6537000	6538000	Chr2	6538000	6539000	2000	3.30103	20	2.70296e-05	0.0227465	6537000	6538000	6538000	6539000	20	1	NA	NA
Chr2	19411000	19412000	Chr2	19412000	19413000	2000	3.30103	40	1.07726e-06	0.00191545	19411000	19412000	19412000	19413000	40	1	AT2G47270	AT2G47270
Chr2	13374000	13375000	Chr2	13375000	13376000	2000	3.30103	36	4.22323e-07	0.000914509	13374000	13375000	13375000	13376000	36	1	NA	AT2G31370,AT2G31380,AT2G31390
Chr2	9088000	9089000	Chr2	9089000	9090000	2000	3.30103	103	9.96405e-06	0.0107736	9088000	9089000	9089000	9090000	103	1	AT2G21188,AT2G21190,AT2G21195,AT2G21200,AT2G21210	AT2G21220,AT2G21230,AT2G21235
Chr2	185000	186000	Chr2	186000	187000	2000	3.30103	81	2.35266e-05	0.0206305	185000	186000	186000	187000	81	1	AT2G01410,AT2G01420,AT2G01422	NA
Chr2	8043000	8044000	Chr2	8044000	8045000	2000	3.30103	110	6.59117e-05	0.0439405	8043000	8044000	8044000	8045000	110	1	AT2G18540	AT2G18540,AT2G18550
Chr2	835000	836000	Chr2	836000	837000	2000	3.30103	46	2.72574e-07	0.000644801	835000	836000	836000	837000	46	1	AT2G02850,AT2G02860	AT2G02870,AT2G02880,AT2G02890,AT2G02900
Chr2	778000	779000	Chr2	779000	780000	2000	3.30103	138	1.60374e-06	0.00261612	778000	779000	779000	780000	138	1	AT2G02740,AT2G02750,AT2G02741,AT2G02760,AT2G02770	AT2G02770,AT2G02780,AT2G02790
Chr2	10853000	10854000	Chr2	10854000	10855000	2000	3.30103	79	1.83808e-05	0.0171992	10853000	10854000	10854000	10855000	79	1	NA	AT2G25500,AT2G25510,AT2G25520,AT2G25530
Chr2	16056000	16057000	Chr2	16057000	16058000	2000	3.30103	90	2.41925e-05	0.0210464	16056000	16057000	16057000	16058000	90	1	AT2G38320	AT2G38320,AT2G38325,AT2G38330
Chr2	16693000	16694000	Chr2	16694000	16695000	2000	3.30103	42	4.44112e-06	0.00574206	16693000	16694000	16694000	16695000	42	1	AT2G39960,AT2G39970,AT2G39980,AT2G39975	AT2G39990,AT2G40000,AT2G40004
Chr2	15158000	15159000	Chr2	15159000	15160000	2000	3.30103	100	2.06802e-05	0.0187694	15158000	15159000	15159000	15160000	100	1	AT2G36090	AT2G36090,AT2G36100
Chr2	17143000	17144000	Chr2	17144000	17145000	2000	3.30103	182	7.71565e-12	9.59424e-08	17143000	17144000	17144000	17145000	182	1	AT2G41120,AT2G41130	AT2G41130,AT2G41140
Chr2	1251000	1252000	Chr2	1252000	1253000	2000	3.30103	65	5.55396e-07	0.00113289	1251000	1252000	1252000	1253000	65	1	NA	AT2G03980
Chr2	874000	875000	Chr2	875000	876000	2000	3.30103	145	2.57287e-05	0.0219941	874000	875000	875000	876000	145	1	AT2G02960,AT2G02970,AT2G02980,AT2G02990	AT2G03000
Chr2	1023000	1024000	Chr2	1024000	1025000	2000	3.30103	58	5.65255e-05	0.0392114	1023000	1024000	1024000	1025000	58	1	AT2G03350,AT2G03360	AT2G03360,AT2G03370,AT2G03380,AT2G03390,AT2G03410,AT2G03420
Chr2	10438000	10439000	Chr2	10439000	10440000	2000	3.30103	115	3.24231e-14	7.79011e-10	10438000	10439000	10439000	10440000	115	1	AT2G24570	AT2G24570,AT2G24580
Chr2	15086000	15087000	Chr2	15087000	15088000	2000	3.30103	61	2.52954e-06	0.00373644	15086000	15087000	15087000	15088000	61	1	NA	AT2G35940,AT2G35945
Chr2	19157000	19158000	Chr2	19158000	19159000	2000	3.30103	37	2.14576e-05	0.019281	19157000	19158000	19158000	19159000	37	1	AT2G46662	AT2G46662
Chr2	18371000	18372000	Chr2	18372000	18373000	2000	3.30103	28	1.24687e-07	0.00034701	18371000	18372000	18372000	18373000	28	1	NA	AT2G44500,AT2G44510,AT2G44520,AT2G44525
Chr2	19009000	19010000	Chr2	19010000	19011000	2000	3.30103	55	6.79204e-13	1.1598e-08	19009000	19010000	19010000	19011000	55	1	AT2G46280,AT2G46290,AT2G46300	AT2G46308,AT2G46310,AT2G46320,AT2G46330
Chr2	16970000	16971000	Chr2	16971000	16972000	2000	3.30103	100	2.14073e-05	0.0192431	16970000	16971000	16971000	16972000	100	1	AT2G40630,AT2G40640,AT2G40650,AT2G40660,AT2G40670	AT2G40670,AT2G40690,AT2G40700,AT2G40710,AT2G40711
Chr2	7244000	7245000	Chr2	7245000	7246000	2000	3.30103	73	1.55243e-06	0.00255273	7244000	7245000	7245000	7246000	73	1	AT2G16700	AT2G16700
Chr2	19357000	19358000	Chr2	19358000	19359000	2000	3.30103	97	3.9556e-05	0.0301158	19357000	19358000	19358000	19359000	97	1	AT2G47160	AT2G47160
Chr2	15735000	15736000	Chr2	15736000	15737000	2000	3.30103	77	1.79313e-05	0.0168968	15735000	15736000	15736000	15737000	77	1	NA	AT2G37470,AT2G37478,AT2G37480,AT2G37500,AT2G37510,AT2G37520
Chr2	9678000	9679000	Chr2	9679000	9680000	2000	3.30103	31	2.5152e-05	0.0216409	9678000	9679000	9679000	9680000	31	1	AT2G22750,AT2G22760	AT2G22760
Chr2	11845000	11846000	Chr2	11846000	11847000	2000	3.30103	143	2.88639e-06	0.00411712	11845000	11846000	11846000	11847000	143	1	AT2G27775,AT2G27780	AT2G27780,AT2G27790,AT2G27800,AT2G27810,AT2G27820
Chr2	1378000	1379000	Chr2	1379000	1380000	2000	3.30103	41	1.17486e-05	0.0122408	1378000	1379000	1379000	1380000	41	1	AT2G04100	AT2G04100,AT2G04115
Chr2	3292000	3293000	Chr2	3293000	3294000	2000	3.30103	6	7.47963e-05	0.0481579	3292000	3293000	3293000	3294000	6	1	AT2G07681,AT2G07778	NA
Chr2	16339000	16340000	Chr2	16340000	16341000	2000	3.30103	46	3.42546e-05	0.0270666	16339000	16340000	16340000	16341000	46	1	AT2G39140,AT2G39160,AT2G39170	AT2G39175,AT2G39180
Chr2	17436000	17437000	Chr2	17437000	17438000	2000	3.30103	80	1.17354e-06	0.00205468	17436000	17437000	17437000	17438000	80	1	AT2G41770,AT2G41780,AT2G41790,AT2G41800	AT2G41800,AT2G41810,AT2G41820
Chr2	15083000	15084000	Chr2	15084000	15085000	2000	3.30103	161	8.27207e-14	1.78963e-09	15083000	15084000	15084000	15085000	161	1	AT2G35910,AT2G35920,AT2G35930	AT2G35930
Chr3	20706000	20707000	Chr3	20707000	20708000	2000	3.30103	159	2.40117e-11	2.60331e-07	20705000	20707000	20707000	20709000	399	1	AT3G55740,AT3G55750,AT3G55760,AT3G55770,AT3G55780	AT3G55780,AT3G55790,AT3G55795,AT3G55800,AT3G55810,AT3G55820,AT3G55830,AT3G55840
Chr3	22594000	22595000	Chr3	22595000	22596000	2000	3.30103	85	6.12317e-10	4.14094e-06	22593000	22595000	22594000	22597000	220	0.666667	AT3G61028,AT3G61030,AT3G61035,AT3G61040	AT3G61040,AT3G61050
Chr3	23143000	23144000	Chr3	23144000	23145000	2000	3.30103	92	4.50433e-10	3.20005e-06	23142000	23144000	23143000	23145000	239	0.75	AT3G62550,AT3G62560,AT3G62570	AT3G62570,AT3G62580,AT3G62590
Chr3	22207000	22208000	Chr3	22208000	22209000	2000	3.30103	90	2.79992e-11	2.96832e-07	22206000	22208000	22207000	22209000	205	0.75	AT3G60120	AT3G60120,AT3G60130,AT3G60140
Chr3	391000	392000	Chr3	392000	393000	2000	3.30103	129	3.73023e-14	8.8293e-10	391000	393000	392000	394000	265	0.75	AT3G02130,AT3G02140,AT3G02150	AT3G02150,AT3G02160,AT3G02170
Chr3	22951000	22952000	Chr3	22952000	22953000	2000	3.30103	155	7.92198e-14	1.72954e-09	22950000	22953000	22952000	22954000	303	0.5	AT3G61970	AT3G61970
Chr3	22896000	22897000	Chr3	22897000	22898000	2000	3.30103	115	8.27121e-11	7.57601e-07	22896000	22897000	22897000	22900000	202	1	AT3G61850	AT3G61850,AT3G61860,AT3G61870,AT3G61880
Chr3	8906000	8907000	Chr3	8907000	8908000	2000	3.30103	47	1.39013e-07	0.000377719	8905000	8907000	8907000	8908000	80	1	AT3G24480	AT3G24490,AT3G24495
Chr3	907000	908000	Chr3	908000	909000	2000	3.30103	88	4.06719e-06	0.00536154	907000	908000	908000	910000	179	1	AT3G03680	AT3G03680,AT3G03690,AT3G03702,AT3G03700
Chr3	20355000	20356000	Chr3	20356000	20357000	2000	3.30103	130	4.19288e-12	5.67911e-08	20354000	20356000	20356000	20357000	200	1	AT3G54940	AT3G54940,AT3G54950
Chr3	23266000	23267000	Chr3	23267000	23268000	2000	3.30103	192	4.88537e-10	3.39404e-06	23266000	23267000	23267000	23269000	295	1	AT3G62907,AT3G62910,AT3G62920,AT3G62930,AT3G62940,AT3G62950	AT3G62960,AT3G62970,AT3G62980
Chr3	19856000	19857000	Chr3	19857000	19858000	2000	3.30103	96	2.83116e-07	0.000665232	19856000	19857000	19857000	19859000	149	1	AT3G53530,AT3G53540,AT3G53550	AT3G53550,AT3G53560,AT3G53570,AT3G53580,AT3G53590
Chr3	9937000	9938000	Chr3	9938000	9939000	2000	3.30103	195	7.3968e-08	0.00022627	9936000	9938000	9938000	9939000	301	1	AT3G26935,AT3G26940	AT3G26940,AT3G26950,AT3G26960,AT3G26980,AT3G26990
Chr3	4837000	4838000	Chr3	4838000	4839000	2000	3.30103	51	1.63094e-06	0.00264966	4836000	4838000	4838000	4839000	77	1	NA	NA
Chr3	3712000	3713000	Chr3	3713000	3714000	2000	3.30103	63	1.0388e-10	9.16381e-07	3712000	3713000	3713000	3715000	102	1	AT3G11710,AT3G11720,AT3G11730,AT3G11740	AT3G11740,AT3G11745,AT3G11750,AT3G11760,AT3G11770,AT3G11773
Chr3	10357000	10358000	Chr3	10358000	10359000	2000	3.30103	90	7.98259e-08	0.000240194	10356000	10358000	10358000	10359000	140	1	AT3G27906,AT3G27910	AT3G27910,AT3G27920,AT3G27925
Chr3	5355000	5356000	Chr3	5356000	5357000	2000	3.30103	101	7.29224e-09	3.362e-05	5355000	5356000	5356000	5358000	163	1	AT3G15820,AT3G15830	AT3G15830,AT3G15840,AT3G15850,AT3G15860,AT3G15870,AT3G15880
Chr3	12355000	12356000	Chr3	12356000	12357000	2000	3.30103	102	2.39492e-06	0.00358283	12355000	12357000	12356000	12358000	157	0.5	AT3G30720,AT3G30725	AT3G30730
Chr3	22361000	22362000	Chr3	22362000	22363000	2000	3.30103	109	3.38225e-17	1.92517e-12	22360000	22362000	22362000	22363000	184	1	AT3G60510,AT3G60520	AT3G60520
Chr3	16058000	16059000	Chr3	16059000	16060000	2000	3.30103	131	1.57537e-05	0.0153033	16057000	16059000	16059000	16060000	207	1	NA	AT3G44428
Chr3	10289000	10290000	Chr3	10290000	10291000	2000	3.30103	161	7.26887e-09	3.35467e-05	10288000	10290000	10290000	10291000	248	1	AT3G27750,AT3G27770,AT3G27785	AT3G27785
Chr3	9993000	9994000	Chr3	9994000	9995000	2000	3.30103	176	1.02777e-08	4.50418e-05	9992000	9994000	9994000	9995000	296	1	AT3G27070,AT3G27080,AT3G27090	AT3G27100,AT3G27110
Chr3	16924000	16925000	Chr3	16925000	16926000	2000	3.30103	69	2.91264e-06	0.00414712	16924000	16925000	16925000	16927000	130	1	NA	AT3G46086,AT3G46090
Chr3	11037000	11038000	Chr3	11038000	11039000	2000	3.30103	138	6.11529e-06	0.00735752	11037000	11038000	11038000	11040000	218	1	AT3G29034,AT3G29035,AT3G29040	AT3G29040,AT3G29050
Chr3	18803000	18804000	Chr3	18804000	18805000	2000	3.30103	92	1.55311e-10	1.3078e-06	18803000	18805000	18804000	18806000	130	0.5	AT3G50630,AT3G50640	AT3G50640,AT3G50650,AT3G50651
Chr3	1749000	1750000	Chr3	1750000	1751000	2000	3.30103	93	2.66259e-05	0.0225439	1749000	1751000	1750000	1752000	149	0.5	AT3G05858	AT3G05860,AT3G05870,AT3G05880,AT3G05890
Chr3	18917000	18918000	Chr3	18918000	18919000	2000	3.30103	54	8.87389e-07	0.00163943	18916000	18918000	18917000	18919000	125	0.5	AT3G50880,AT3G50890,AT3G50895	AT3G50900,AT3G50910,AT3G50920,AT3G50925
Chr3	7867000	7868000	Chr3	7868000	7869000	2000	3.30103	129	1.20604e-08	5.12569e-05	7867000	7869000	7868000	7870000	249	0.5	AT3G22240,AT3G22250	AT3G22250,AT3G22260
Chr3	8122000	8123000	Chr3	8123000	8124000	2000	3.30103	126	1.82802e-10	1.50693e-06	8121000	8123000	8123000	8124000	178	1	AT3G22920	AT3G22920,AT3G22930,AT3G22940
Chr3	23346000	23347000	Chr3	23347000	23348000	2000	3.30103	90	9.46092e-11	8.50284e-07	23346000	23347000	23347000	23348000	90	1	AT3G63170,AT3G63180,AT3G63190,AT3G63200	AT3G63200,AT3G63210,AT3G63220
Chr3	21147000	21148000	Chr3	21148000	21149000	2000	3.30103	105	6.95586e-08	0.000216139	21147000	21148000	21148000	21149000	105	1	AT3G57120,AT3G57130	AT3G57130,AT3G57140
Chr3	2631000	2632000	Chr3	2632000	2633000	2000	3.30103	259	1.62008e-14	4.16452e-10	2631000	2632000	2632000	2633000	259	1	AT3G08630,AT3G08636,AT3G08640,AT3G08650,AT3G08660	AT3G08660,AT3G08670,AT3G08680,AT3G08690
Chr3	6622000	6623000	Chr3	6623000	6624000	2000	3.30103	109	8.03052e-08	0.000241332	6622000	6623000	6623000	6624000	109	1	AT3G19160	AT3G19160,AT3G19170,AT3G19180
Chr3	5791000	5792000	Chr3	5792000	5793000	2000	3.30103	83	7.0729e-06	0.00824572	5791000	5792000	5792000	5793000	83	1	AT3G16940,AT3G16950,AT3G16960	AT3G16960,AT3G16970,AT3G16980,AT3G16990,AT3G17000,AT3G17010
Chr3	2347000	2348000	Chr3	2348000	2349000	2000	3.30103	93	1.34381e-17	8.13306e-13	2347000	2348000	2348000	2349000	93	1	AT3G07350	AT3G07350
Chr3	22171000	22172000	Chr3	22172000	22173000	2000	3.30103	59	1.55086e-08	6.38129e-05	22171000	22172000	22172000	22173000	59	1	NA	NA
Chr3	418000	419000	Chr3	419000	420000	2000	3.30103	97	1.12325e-10	9.81823e-07	418000	419000	419000	420000	97	1	AT3G02230,AT3G02240	AT3G02240
Chr3	4978000	4979000	Chr3	4979000	4980000	2000	3.30103	30	7.37077e-05	0.0476237	4978000	4979000	4979000	4980000	30	1	AT3G14810,AT3G14820	AT3G14820,AT3G14830,AT3G14840
Chr3	3872000	3873000	Chr3	3873000	3874000	2000	3.30103	149	3.57831e-07	0.000802478	3872000	3873000	3873000	3874000	149	1	AT3G12130,AT3G12140	AT3G12145
Chr3	21833000	21834000	Chr3	21834000	21835000	2000	3.30103	73	2.13106e-07	0.00053207	21833000	21834000	21834000	21835000	73	1	AT3G59060,AT3G59068,AT3G59070	AT3G59070,AT3G59080,AT3G59090,AT3G59100
Chr3	10529000	10530000	Chr3	10530000	10531000	2000	3.30103	69	6.36084e-07	0.00126773	10529000	10530000	10530000	10531000	69	1	AT3G28223,AT3G28230	AT3G28230,AT3G28243
Chr3	18702000	18703000	Chr3	18703000	18704000	2000	3.30103	158	3.61646e-05	0.0282075	18702000	18703000	18703000	18704000	158	1	AT3G50380,AT3G50390	AT3G50390,AT3G50400,AT3G50410,AT3G50420
Chr3	4420000	4421000	Chr3	4421000	4422000	2000	3.30103	246	1.53528e-08	6.33902e-05	4420000	4421000	4421000	4422000	246	1	AT3G13525,AT3G13530,AT3G13540	AT3G13540
Chr3	1221000	1222000	Chr3	1222000	1223000	2000	3.30103	90	4.02915e-07	0.000882475	1221000	1222000	1222000	1223000	90	1	AT3G04500,AT3G04510,AT3G04520,AT3G04525,AT3G04530	AT3G04530,AT3G04540,AT3G04545,AT3G04550,AT3G04560,AT3G04570
Chr3	15974000	15975000	Chr3	15975000	15976000	2000	3.30103	33	5.4257e-05	0.0380879	15974000	15975000	15975000	15976000	33	1	AT3G44290	AT3G44290,AT3G44300
Chr3	10911000	10912000	Chr3	10912000	10913000	2000	3.30103	52	7.34773e-07	0.00141659	10911000	10912000	10912000	10913000	52	1	AT3G28910	AT3G28910
Chr3	5309000	5310000	Chr3	5310000	5311000	2000	3.30103	69	5.99339e-05	0.0409151	5309000	5310000	5310000	5311000	69	1	AT3G15640,AT3G15650,AT3G15660,AT3G15670	AT3G15670,AT3G15680
Chr3	19016000	19017000	Chr3	19017000	19018000	2000	3.30103	86	1.6644e-05	0.0159766	19016000	19017000	19017000	19018000	86	1	AT3G51180,AT3G51190	AT3G51190,AT3G51200,AT3G51210,AT3G51220,AT3G51230,AT3G51238,AT3G51240
Chr3	2005000	2006000	Chr3	2006000	2007000	2000	3.30103	89	7.95061e-10	5.20026e-06	2005000	2006000	2006000	2007000	89	1	AT3G06490	AT3G06490,AT3G06500,AT3G06510
Chr3	8155000	8156000	Chr3	8156000	8157000	2000	3.30103	17	4.05673e-05	0.0306339	8155000	8156000	8156000	8157000	17	1	AT3G22968,AT3G22970	AT3G22980,AT3G22990
Chr3	8309000	8310000	Chr3	8310000	8311000	2000	3.30103	109	5.42005e-11	5.19332e-07	8309000	8310000	8310000	8311000	109	1	AT3G23250	AT3G23250,AT3G23255
Chr3	20014000	20015000	Chr3	20015000	20016000	2000	3.30103	60	7.90433e-07	0.00149782	20014000	20015000	20015000	20016000	60	1	AT3G54020,AT3G54030,AT3G54040	AT3G54040,AT3G54050,AT3G54060,AT3G54070,AT3G54080
Chr3	8488000	8489000	Chr3	8489000	8490000	2000	3.30103	59	2.75312e-07	0.000650044	8488000	8489000	8489000	8490000	59	1	AT3G23610,AT3G23620,AT3G23630	AT3G23630
Chr3	5505000	5506000	Chr3	5506000	5507000	2000	3.30103	48	1.70718e-05	0.0163011	5505000	5506000	5506000	5507000	48	1	AT3G16230,AT3G16240	AT3G16240,AT3G16250,AT3G16260,AT3G16270
Chr3	16293000	16294000	Chr3	16294000	16295000	2000	3.30103	62	2.93796e-07	0.000685227	16293000	16294000	16294000	16295000	62	1	NA	AT3G44740,AT3G44750
Chr3	5264000	5265000	Chr3	5265000	5266000	2000	3.30103	55	7.28203e-06	0.00844464	5264000	5265000	5265000	5266000	55	1	AT3G15540	AT3G15540,AT3G15548,AT3G15550,AT3G15570
Chr3	8180000	8181000	Chr3	8181000	8182000	2000	3.30103	60	5.36427e-11	5.17105e-07	8180000	8181000	8181000	8182000	60	1	AT3G23030	AT3G23030
Chr3	10010000	10011000	Chr3	10011000	10012000	2000	3.30103	36	4.56173e-05	0.0335396	10010000	10011000	10011000	10012000	36	1	AT3G27150	AT3G27150
Chr3	3654000	3655000	Chr3	3655000	3656000	2000	3.30103	32	1.28279e-05	0.0130915	3654000	3655000	3655000	3656000	32	1	NA	NA
Chr3	3445000	3446000	Chr3	3446000	3447000	2000	3.30103	109	2.31877e-09	1.26995e-05	3445000	3446000	3446000	3447000	109	1	AT3G10970,AT3G10974,AT3G10980,AT3G10985,AT3G10986	AT3G10990,AT3G11000,AT3G11010,AT3G11020
Chr3	2663000	2664000	Chr3	2664000	2665000	2000	3.30103	75	7.3552e-07	0.00141746	2663000	2664000	2664000	2665000	75	1	AT3G08760,AT3G08762	AT3G08770,AT3G08780
Chr3	20894000	20895000	Chr3	20895000	20896000	2000	3.30103	184	3.17865e-13	5.9428e-09	20894000	20895000	20895000	20896000	184	1	AT3G56320,AT3G56330,AT3G56340,AT3G56350	AT3G56350,AT3G56360
Chr3	8983000	8984000	Chr3	8984000	8985000	2000	3.30103	92	8.99206e-06	0.00994066	8983000	8984000	8984000	8985000	92	1	NA	AT3G24630
Chr3	18855000	18856000	Chr3	18856000	18857000	2000	3.30103	125	2.00241e-07	0.000504959	18855000	18856000	18856000	18857000	125	1	AT3G50740	AT3G50740
Chr3	21301000	21302000	Chr3	21302000	21303000	2000	3.30103	65	2.17104e-06	0.00331948	21301000	21302000	21302000	21303000	65	1	AT3G57530,AT3G57540	AT3G57540,AT3G57550,AT3G57560,AT3G57570
Chr3	10020000	10021000	Chr3	10021000	10022000	2000	3.30103	19	9.88619e-07	0.00179183	10020000	10021000	10021000	10022000	19	1	AT3G27160	AT3G27170
Chr3	22955000	22956000	Chr3	22956000	22957000	2000	3.30103	67	1.77823e-06	0.00283941	22955000	22956000	22956000	22957000	67	1	NA	AT3G61980,AT3G61990,AT3G62000,AT3G62010
Chr3	3651000	3652000	Chr3	3652000	3653000	2000	3.30103	46	8.34144e-10	5.4262e-06	3651000	3652000	3652000	3653000	46	1	AT3G11580	NA
Chr3	9369000	9370000	Chr3	9370000	9371000	2000	3.30103	95	1.00032e-05	0.0108037	9369000	9370000	9370000	9371000	95	1	AT3G25710	AT3G25710,AT3G25715,AT3G25716,AT3G25717
Chr3	18046000	18047000	Chr3	18047000	18048000	2000	3.30103	64	4.37518e-07	0.000935966	18046000	18047000	18047000	18048000	64	1	AT3G48720	AT3G48720
Chr3	8079000	8080000	Chr3	8080000	8081000	2000	3.30103	121	2.75728e-06	0.00399835	8079000	8080000	8080000	8081000	121	1	AT3G22820,AT3G22830	AT3G22830
Chr3	17529000	17530000	Chr3	17530000	17531000	2000	3.30103	97	2.65854e-06	0.0038884	17529000	17530000	17530000	17531000	97	1	AT3G47530,AT3G47540,AT3G47543,AT3G47550,AT3G47560,AT3G47570	AT3G47570,AT3G47580,AT3G47590
Chr3	6473000	6474000	Chr3	6474000	6475000	2000	3.30103	56	5.12256e-07	0.00106027	6473000	6474000	6474000	6475000	56	1	AT3G18770,AT3G18773	AT3G18779,AT3G18780
Chr3	83000	84000	Chr3	84000	85000	2000	3.30103	221	2.61605e-11	2.79821e-07	83000	84000	84000	85000	221	1	AT3G01250,AT3G01260,AT3G01270	AT3G01270,AT3G01280,AT3G01290,AT3G01300,AT3G01310
Chr3	10512000	10513000	Chr3	10513000	10514000	2000	3.30103	62	6.6239e-07	0.00130816	10512000	10513000	10513000	10514000	62	1	AT3G28180,AT3G28190	AT3G28190,AT3G28193
Chr3	19638000	19639000	Chr3	19639000	19640000	2000	3.30103	94	4.1162e-05	0.0309784	19638000	19639000	19639000	19640000	94	1	AT3G52930,AT3G52940,AT3G52941,AT3G52950,AT3G52955	AT3G52960,AT3G52970,AT3G52980,AT3G52990
Chr3	23318000	23319000	Chr3	23319000	23320000	2000	3.30103	200	1.74847e-16	8.19596e-12	23318000	23319000	23319000	23320000	200	1	AT3G63080,AT3G63088,AT3G63090,AT3G63095,AT3G63110	AT3G63110,AT3G63120,AT3G63130,AT3G63140,AT3G63150
Chr3	5492000	5493000	Chr3	5493000	5494000	2000	3.30103	148	2.70762e-05	0.0227719	5492000	5493000	5493000	5494000	148	1	AT3G16190,AT3G16200	AT3G16200,AT3G16210,AT3G16220
Chr3	22325000	22326000	Chr3	22326000	22327000	2000	3.30103	76	3.06364e-10	2.32509e-06	22325000	22326000	22326000	22327000	76	1	NA	AT3G60400
Chr3	6165000	6166000	Chr3	6166000	6167000	2000	3.30103	133	3.38781e-05	0.026849	6165000	6166000	6166000	6167000	133	1	AT3G17998,AT3G18000,AT3G18010,AT3G18020	AT3G18020
Chr3	13048000	13049000	Chr3	13049000	13050000	2000	3.30103	90	2.32067e-06	0.00349913	13048000	13049000	13049000	13050000	90	1	AT3G32036,AT3G32040	AT3G32040
Chr3	20803000	20804000	Chr3	20804000	20805000	2000	3.30103	162	2.27986e-18	1.60303e-13	20803000	20804000	20804000	20805000	162	1	AT3G56040,AT3G56050,AT3G56060	AT3G56060,AT3G56070,AT3G56080,AT3G56085,AT3G56090
Chr3	21676000	21677000	Chr3	21677000	21678000	2000	3.30103	57	1.88665e-07	0.000481868	21676000	21677000	21677000	21678000	57	1	AT3G58590,AT3G58600,AT3G58610	AT3G58620,AT3G58630,AT3G58640
Chr3	18390000	18391000	Chr3	18391000	18392000	2000	3.30103	114	4.53756e-06	0.00583519	18390000	18391000	18391000	18392000	114	1	AT3G49590,AT3G49600,AT3G49601,AT3G49610	AT3G49610,AT3G49620,AT3G49630,AT3G49640
Chr3	1061000	1062000	Chr3	1062000	1063000	2000	3.30103	55	6.28633e-08	0.000198132	1061000	1062000	1062000	1063000	55	1	AT3G04070	AT3G04070
Chr3	8012000	8013000	Chr3	8013000	8014000	2000	3.30103	228	7.84809e-05	0.0498522	8012000	8013000	8013000	8014000	228	1	AT3G22600,AT3G22620,AT3G22630,AT3G22640	AT3G22640,AT3G22650,AT3G22660,AT3G22670
Chr3	2882000	2883000	Chr3	2883000	2884000	2000	3.30103	215	1.26891e-05	0.0129748	2882000	2883000	2883000	2884000	215	1	AT3G09350,AT3G09360,AT3G09370	NA
Chr3	10061000	10062000	Chr3	10062000	10063000	2000	3.30103	187	2.39833e-18	1.66189e-13	10061000	10062000	10062000	10063000	187	1	AT3G27220,AT3G27230,AT3G27240,AT3G27250	AT3G27250,AT3G27260
Chr3	1053000	1054000	Chr3	1054000	1055000	2000	3.30103	151	3.90422e-16	1.69701e-11	1053000	1054000	1054000	1055000	151	1	AT3G04030,AT3G04040,AT3G04050,AT3G04060	AT3G04060
Chr3	22763000	22764000	Chr3	22764000	22765000	2000	3.30103	80	1.07605e-06	0.00191473	22763000	22764000	22764000	22765000	80	1	AT3G61510	AT3G61510
Chr3	1823000	1824000	Chr3	1824000	1825000	2000	3.30103	94	6.55144e-06	0.00776503	1823000	1824000	1824000	1825000	94	1	AT3G06019,AT3G06020,AT3G06030,AT3G06035	AT3G06035,AT3G06040,AT3G06050,AT3G06060,AT3G06070
Chr3	7471000	7472000	Chr3	7472000	7473000	2000	3.30103	243	1.42228e-07	0.00038398	7471000	7472000	7472000	7473000	243	1	NA	AT3G21270,AT3G21280,AT3G21290
Chr3	4609000	4610000	Chr3	4610000	4611000	2000	3.30103	159	1.61162e-08	6.55237e-05	4609000	4610000	4610000	4611000	159	1	AT3G13960	AT3G13960,AT3G13970
Chr3	9317000	9318000	Chr3	9318000	9319000	2000	3.30103	169	7.05008e-07	0.00137417	9317000	9318000	9318000	9319000	169	1	AT3G25600,AT3G25610,AT3G25620	AT3G25620
Chr3	8326000	8327000	Chr3	8327000	8328000	2000	3.30103	97	5.44823e-07	0.00111475	8326000	8327000	8327000	8328000	97	1	AT3G23290	AT3G23290,AT3G23300
Chr3	20740000	20741000	Chr3	20741000	20742000	2000	3.30103	50	1.53285e-05	0.0149765	20740000	20741000	20741000	20742000	50	1	AT3G55880,AT3G55890	AT3G55890,AT3G55900,AT3G55910,AT3G55920
Chr3	19441000	19442000	Chr3	19442000	19443000	2000	3.30103	89	1.53913e-19	1.36277e-14	19441000	19442000	19442000	19443000	89	1	AT3G52450	AT3G52450,AT3G52460
Chr3	1536000	1537000	Chr3	1537000	1538000	2000	3.30103	121	9.34652e-12	1.12e-07	1536000	1537000	1537000	1538000	121	1	AT3G05340,AT3G05350,AT3G05360,AT3G05370	AT3G05370,AT3G05380,AT3G05390
Chr3	23237000	23238000	Chr3	23238000	23239000	2000	3.30103	62	2.58769e-05	0.0220897	23237000	23238000	23238000	23239000	62	1	AT3G62800,AT3G62810,AT3G62820,AT3G62830,AT3G62840,AT3G62850	AT3G62850
Chr3	21970000	21971000	Chr3	21971000	21972000	2000	3.30103	92	1.72639e-05	0.0164433	21970000	21971000	21971000	21972000	92	1	AT3G59420,AT3G59430,AT3G59440	AT3G59440
Chr3	4143000	4144000	Chr3	4144000	4145000	2000	3.30103	51	1.58954e-05	0.0154072	4143000	4144000	4144000	4145000	51	1	AT3G12977	AT3G12977
Chr3	17975000	17976000	Chr3	17976000	17977000	2000	3.30103	135	3.99231e-13	7.36998e-09	17975000	17976000	17976000	17977000	135	1	AT3G48515,AT3G48520	AT3G48520
Chr3	1172000	1173000	Chr3	1173000	1174000	2000	3.30103	65	7.81966e-09	3.57568e-05	1172000	1173000	1173000	1174000	65	1	AT3G04400,AT3G04410,AT3G04420	AT3G04420,AT3G04430,AT3G04440,AT3G04450
Chr3	18021000	18022000	Chr3	18022000	18023000	2000	3.30103	123	6.53742e-13	1.12842e-08	18021000	18022000	18022000	18023000	123	1	AT3G48610,AT3G48620,AT3G48630,AT3G48640	AT3G48640
Chr3	7699000	7700000	Chr3	7700000	7701000	2000	3.30103	61	1.07655e-05	0.0114594	7699000	7700000	7700000	7701000	61	1	AT3G21860	AT3G21860,AT3G21865
Chr3	15354000	15355000	Chr3	15355000	15356000	2000	3.30103	68	1.84117e-05	0.0172151	15354000	15355000	15355000	15356000	68	1	AT3G43420,AT3G43430	AT3G43430,AT3G43431,AT3G43432
Chr3	21372000	21373000	Chr3	21373000	21374000	2000	3.30103	158	1.27866e-05	0.0130552	21372000	21373000	21373000	21374000	158	1	AT3G57660,AT3G57670	AT3G57670,AT3G57680
Chr3	5471000	5472000	Chr3	5472000	5473000	2000	3.30103	36	3.07963e-07	0.00071133	5471000	5472000	5472000	5473000	36	1	AT3G16110,AT3G16117,AT3G16120,AT3G16130,AT3G16140,AT3G16150	AT3G16150
Chr3	7929000	7930000	Chr3	7930000	7931000	2000	3.30103	239	5.27622e-09	2.56633e-05	7929000	7930000	7930000	7931000	239	1	AT3G22400	AT3G22400,AT3G22410
Chr3	8498000	8499000	Chr3	8499000	8500000	2000	3.30103	39	5.31011e-05	0.0375022	8498000	8499000	8499000	8500000	39	1	AT3G23633,AT3G23635	AT3G23637,AT3G23640
Chr3	16922000	16923000	Chr3	16923000	16924000	2000	3.30103	56	2.7424e-08	0.000100553	16922000	16923000	16923000	16924000	56	1	AT3G46080	AT3G46080
Chr3	4534000	4535000	Chr3	4535000	4536000	2000	3.30103	87	1.02695e-05	0.0110513	4534000	4535000	4535000	4536000	87	1	AT3G13790	AT3G13790,AT3G13800,AT3G13810
Chr3	3879000	3880000	Chr3	3880000	3881000	2000	3.30103	120	1.73514e-12	2.6337e-08	3879000	3880000	3880000	3881000	120	1	AT3G12150,AT3G12160	AT3G12160,AT3G12170,AT3G12180
Chr3	2924000	2925000	Chr3	2925000	2926000	2000	3.30103	152	7.25526e-05	0.0471322	2924000	2925000	2925000	2926000	152	1	AT3G09470,AT3G09480,AT3G09490,AT3G09500,AT3G09505,AT3G09510,AT3G09520	AT3G09520,AT3G09530,AT3G09540,AT3G09550
Chr3	17759000	17760000	Chr3	17760000	17761000	2000	3.30103	63	2.28538e-05	0.0201977	17759000	17760000	17760000	17761000	63	1	AT3G48070,AT3G48080,AT3G48090,AT3G48100	AT3G48100,AT3G48110
Chr3	19565000	19566000	Chr3	19566000	19567000	2000	3.30103	82	3.13461e-07	0.000720406	19565000	19566000	19566000	19567000	82	1	AT3G52765,AT3G52770,AT3G52780,AT3G52790	AT3G52790
Chr3	5134000	5135000	Chr3	5135000	5136000	2000	3.30103	108	9.94261e-11	8.88564e-07	5134000	5135000	5135000	5136000	108	1	AT3G15220,AT3G15240	AT3G15240,AT3G15250,AT3G15251,AT3G15260,AT3G15270
Chr3	10389000	10390000	Chr3	10390000	10391000	2000	3.30103	158	1.00677e-06	0.00181852	10389000	10390000	10390000	10391000	158	1	AT3G27950,AT3G27960,AT3G27968,AT3G27970	AT3G27970
Chr3	755000	756000	Chr3	756000	757000	2000	3.30103	136	1.31429e-07	0.000361355	755000	756000	756000	757000	136	1	AT3G03240,AT3G03250,AT3G03260	AT3G03260,AT3G03270,AT3G03272,AT3G03280,AT3G03290
Chr3	22398000	22399000	Chr3	22399000	22400000	2000	3.30103	107	5.58402e-05	0.0388796	22398000	22399000	22399000	22400000	107	1	AT3G60590	AT3G60590,AT3G60600,AT3G60620
Chr3	5837000	5838000	Chr3	5838000	5839000	2000	3.30103	121	4.36822e-12	5.89989e-08	5837000	5838000	5838000	5839000	121	1	AT3G17100	AT3G17120
Chr3	22922000	22923000	Chr3	22923000	22924000	2000	3.30103	47	1.90025e-07	0.000484307	22922000	22923000	22923000	22924000	47	1	AT3G61890,AT3G61897,AT3G61898	AT3G61900
Chr3	20773000	20774000	Chr3	20774000	20775000	2000	3.30103	23	4.21805e-05	0.0315901	20773000	20774000	20774000	20775000	23	1	NA	AT3G55980,AT3G55990,AT3G56000
Chr3	8270000	8271000	Chr3	8271000	8272000	2000	3.30103	54	4.22189e-06	0.00552856	8270000	8271000	8271000	8272000	54	1	AT3G23170,AT3G23171	AT3G23172
Chr3	5067000	5068000	Chr3	5068000	5069000	2000	3.30103	69	1.92014e-05	0.0177542	5067000	5068000	5068000	5069000	69	1	AT3G15030,AT3G15040,AT3G15050	AT3G15055,AT3G15060,AT3G15070,AT3G15080,AT3G15090
Chr3	23069000	23070000	Chr3	23070000	23071000	2000	3.30103	159	1.39676e-05	0.013979	23069000	23070000	23070000	23071000	159	1	AT3G62320,AT3G62330,AT3G62336,AT3G62340	AT3G62340,AT3G62350,AT3G62360
Chr3	22789000	22790000	Chr3	22790000	22791000	2000	3.30103	62	4.08919e-08	0.000139554	22789000	22790000	22790000	22791000	62	1	AT3G61560,AT3G61570,AT3G61571,AT3G61580	AT3G61590,AT3G61600,AT3G61610
Chr3	5243000	5244000	Chr3	5244000	5245000	2000	3.30103	105	1.49403e-14	3.90348e-10	5243000	5244000	5244000	5245000	105	1	AT3G15500,AT3G15510	AT3G15510,AT3G15518,AT3G15520
Chr3	18784000	18785000	Chr3	18785000	18786000	2000	3.30103	57	4.77796e-05	0.0346184	18784000	18785000	18785000	18786000	57	1	AT3G50590,AT3G50610,AT3G50620	AT3G50620
Chr3	5258000	5259000	Chr3	5259000	5260000	2000	3.30103	34	1.37443e-05	0.0138377	5258000	5259000	5259000	5260000	34	1	AT3G15530,AT3G15534	AT3G15534,AT3G15536
Chr3	18482000	18483000	Chr3	18483000	18484000	2000	3.30103	160	2.17548e-08	8.42911e-05	18482000	18483000	18483000	18484000	160	1	AT3G49800,AT3G49810,AT3G49820,AT3G49830	AT3G49830,AT3G49840,AT3G49845,AT3G49850,AT3G49860,AT3G49870
Chr3	412000	413000	Chr3	413000	414000	2000	3.30103	109	8.34234e-08	0.000248671	412000	413000	413000	414000	109	1	AT3G02180,AT3G02190,AT3G02200,AT3G02210,AT3G02220	AT3G02220
Chr3	21157000	21158000	Chr3	21158000	21159000	2000	3.30103	147	3.87452e-05	0.0296876	21157000	21158000	21158000	21159000	147	1	AT3G57150,AT3G57157,AT3G57160	AT3G57160,AT3G57170,AT3G57180,AT3G57190
Chr3	23128000	23129000	Chr3	23129000	23130000	2000	3.30103	114	1.70838e-07	0.000443201	23128000	23129000	23129000	23130000	114	1	NA	AT3G62528,AT3G62530,AT3G62540
Chr3	7212000	7213000	Chr3	7213000	7214000	2000	3.30103	107	2.07405e-08	8.10176e-05	7212000	7213000	7213000	7214000	107	1	AT3G20640	AT3G20640
Chr3	19173000	19174000	Chr3	19174000	19175000	2000	3.30103	171	1.13542e-07	0.000320734	19173000	19174000	19174000	19175000	171	1	AT3G51670,AT3G51680	AT3G51680,AT3G51690,AT3G51700,AT3G51710
Chr3	19254000	19255000	Chr3	19255000	19256000	2000	3.30103	43	1.26542e-05	0.0129501	19254000	19255000	19255000	19256000	43	1	AT3G51870,AT3G51880,AT3G51890,AT3G51895	AT3G51895
Chr3	7680000	7681000	Chr3	7681000	7682000	2000	3.30103	138	4.16759e-05	0.0312993	7680000	7681000	7681000	7682000	138	1	AT3G21790,AT3G21800	AT3G21800,AT3G21805,AT3G21810
Chr3	4941000	4942000	Chr3	4942000	4943000	2000	3.30103	172	1.36708e-06	0.0023084	4941000	4942000	4942000	4943000	172	1	AT3G14680,AT3G14690,AT3G14700,AT3G14710	AT3G14710,AT3G14720,AT3G14730,AT3G14735,AT3G14740
Chr3	21521000	21522000	Chr3	21522000	21523000	2000	3.30103	71	9.41808e-07	0.00171871	21521000	21522000	21522000	21523000	71	1	AT3G58100,AT3G58110,AT3G58120	AT3G58120,AT3G58130,AT3G58140,AT3G58150
Chr3	3375000	3376000	Chr3	3376000	3377000	2000	3.30103	112	1.81189e-05	0.0170065	3375000	3376000	3376000	3377000	112	1	AT3G10770,AT3G10780	AT3G10780
Chr3	6553000	6554000	Chr3	6554000	6555000	2000	3.30103	90	2.12342e-06	0.00326031	6553000	6554000	6554000	6555000	90	1	AT3G18990,AT3G19000	AT3G19000,AT3G19002,AT3G19010,AT3G19020,AT3G19030
Chr3	8084000	8085000	Chr3	8085000	8086000	2000	3.30103	76	1.38033e-06	0.00232549	8084000	8085000	8085000	8086000	76	1	AT3G22840	AT3G22840
Chr3	19010000	19011000	Chr3	19011000	19012000	2000	3.30103	95	3.77077e-09	1.93445e-05	19010000	19011000	19011000	19012000	95	1	AT3G51150,AT3G51160,AT3G51171	AT3G51171
Chr3	21284000	21285000	Chr3	21285000	21286000	2000	3.30103	99	1.09045e-05	0.0115655	21284000	21285000	21285000	21286000	99	1	AT3G57500,AT3G57510	AT3G57510
Chr3	5321000	5322000	Chr3	5322000	5323000	2000	3.30103	217	2.35173e-06	0.0035337	5321000	5322000	5322000	5323000	217	1	AT3G15690,AT3G15700	AT3G15700,AT3G15710,AT3G15720,AT3G15730
Chr3	3367000	3368000	Chr3	3368000	3369000	2000	3.30103	78	3.39595e-06	0.00464975	3367000	3368000	3368000	3369000	78	1	AT3G10720,AT3G10730,AT3G10740,AT3G10745,AT3G10750	AT3G10750,AT3G10760
Chr3	2377000	2378000	Chr3	2378000	2379000	2000	3.30103	37	4.9602e-05	0.0356524	2377000	2378000	2378000	2379000	37	1	AT3G07400,AT3G07410,AT3G07420	AT3G07425,AT3G07430,AT3G07440,AT3G07450
Chr3	18823000	18824000	Chr3	18824000	18825000	2000	3.30103	31	7.27657e-06	0.00844241	18823000	18824000	18824000	18825000	31	1	AT3G50660	AT3G50665
Chr3	9814000	9815000	Chr3	9815000	9816000	2000	3.30103	99	1.25651e-07	0.000349048	9814000	9815000	9815000	9816000	99	1	AT3G26680,AT3G26690,AT3G26700,AT3G26710	AT3G26720,AT3G26730
Chr3	19115000	19116000	Chr3	19116000	19117000	2000	3.30103	121	3.36494e-08	0.000119175	19115000	19116000	19116000	19117000	121	1	AT3G51490,AT3G51500,AT3G51510,AT3G51520,AT3G51530,AT3G51540	AT3G51540,AT3G51550
Chr3	8398000	8399000	Chr3	8399000	8400000	2000	3.30103	93	4.50371e-06	0.0058035	8398000	8399000	8399000	8400000	93	1	AT3G23430	AT3G23440
Chr3	21276000	21277000	Chr3	21277000	21278000	2000	3.30103	49	1.10103e-05	0.0116596	21276000	21277000	21277000	21278000	49	1	AT3G57470	AT3G57480,AT3G57490
Chr3	4109000	4110000	Chr3	4110000	4111000	2000	3.30103	145	2.26989e-05	0.0201028	4109000	4110000	4110000	4111000	145	1	AT3G12900,AT3G12910	AT3G12910,AT3G12915
Chr3	3186000	3187000	Chr3	3187000	3188000	2000	3.30103	131	1.0877e-06	0.00192967	3186000	3187000	3187000	3188000	131	1	AT3G10300	AT3G10300,AT3G10310,AT3G10320
Chr3	7596000	7597000	Chr3	7597000	7598000	2000	3.30103	176	2.84603e-07	0.000667693	7596000	7597000	7597000	7598000	176	1	AT3G21540,AT3G21550,AT3G21560	AT3G21560,AT3G21570,AT3G21580,AT3G21590,AT3G21600
Chr3	8108000	8109000	Chr3	8109000	8110000	2000	3.30103	39	5.20135e-07	0.00107286	8108000	8109000	8109000	8110000	39	1	AT3G22886	NA
Chr3	5609000	5610000	Chr3	5610000	5611000	2000	3.30103	26	1.3756e-05	0.0138407	5609000	5610000	5610000	5611000	26	1	AT3G16490	AT3G16500,AT3G16510,AT3G16520
Chr3	20909000	20910000	Chr3	20910000	20911000	2000	3.30103	82	1.99149e-07	0.000503361	20909000	20910000	20910000	20911000	82	1	AT3G56400	AT3G56400
Chr3	14207000	14208000	Chr3	14208000	14209000	2000	3.30103	67	7.59169e-05	0.0486631	14207000	14208000	14208000	14209000	67	1	NA	NA
Chr3	11531000	11532000	Chr3	11532000	11533000	2000	3.30103	111	3.33409e-06	0.00458499	11531000	11532000	11532000	11533000	111	1	AT3G29670,AT3G29680	AT3G29680,AT3G29690
Chr3	297000	298000	Chr3	298000	299000	2000	3.30103	184	1.62001e-08	6.57527e-05	297000	298000	298000	299000	184	1	AT3G01800,AT3G01810,AT3G01820,AT3G01830,AT3G01840	AT3G01830,AT3G01840,AT3G01850,AT3G01860,AT3G01870,AT3G01880
Chr3	828000	829000	Chr3	829000	830000	2000	3.30103	113	8.77258e-09	3.9384e-05	828000	829000	829000	830000	113	1	AT3G03450,AT3G03456,AT3G03460,AT3G03470,AT3G03480	AT3G03480,AT3G03490,AT3G03500,AT3G03510,AT3G03520
Chr3	4141000	4142000	Chr3	4142000	4143000	2000	3.30103	130	6.83406e-07	0.00134246	4141000	4142000	4142000	4143000	130	1	AT3G12970	AT3G12970
Chr3	17457000	17458000	Chr3	17458000	17459000	2000	3.30103	68	2.92218e-05	0.0240435	17457000	17458000	17458000	17459000	68	1	AT3G47350,AT3G47360,AT3G47370,AT3G47380	AT3G47380
Chr3	7215000	7216000	Chr3	7216000	7217000	2000	3.30103	62	1.62112e-06	0.00263819	7215000	7216000	7216000	7217000	62	1	NA	AT3G20650,AT3G20655,AT3G20660
Chr3	22701000	22702000	Chr3	22702000	22703000	2000	3.30103	174	2.29163e-09	1.25652e-05	22701000	22702000	22702000	22703000	174	1	AT3G61340	AT3G61340,AT3G61350,AT3G61360
Chr3	559000	560000	Chr3	560000	561000	2000	3.30103	75	2.6905e-05	0.0226878	559000	560000	560000	561000	75	1	AT3G02590,AT3G02600,AT3G02610	AT3G02620,AT3G02630,AT3G02640
Chr3	16077000	16078000	Chr3	16078000	16079000	2000	3.30103	40	1.1047e-05	0.0116855	16077000	16078000	16078000	16079000	40	1	AT3G44430,AT3G44440,AT3G44444,AT3G44450	NA
Chr3	23239000	23240000	Chr3	23240000	23241000	2000	3.30103	90	9.58045e-07	0.00174302	23239000	23240000	23240000	23241000	90	1	AT3G62850,AT3G62860	AT3G62860,AT3G62870,AT3G62880,AT3G62890,AT3G62900
Chr3	7798000	7799000	Chr3	7799000	7800000	2000	3.30103	172	3.47178e-05	0.0273648	7798000	7799000	7799000	7800000	172	1	AT3G22104,AT3G22110,AT3G22120,AT3G22121	NA
Chr3	9583000	9584000	Chr3	9584000	9585000	2000	3.30103	182	6.88052e-07	0.00134937	9583000	9584000	9584000	9585000	182	1	AT3G26180,AT3G26190	AT3G26190
Chr3	5006000	5007000	Chr3	5007000	5008000	2000	3.30103	104	9.9675e-15	2.77077e-10	5006000	5007000	5007000	5008000	104	1	AT3G14850,AT3G14855,AT3G14860,AT3G14870,AT3G14880	AT3G14880,AT3G14890,AT3G14900,AT3G14910
Chr3	8201000	8202000	Chr3	8202000	8203000	2000	3.30103	77	2.76065e-05	0.0230839	8201000	8202000	8202000	8203000	77	1	AT3G23060	AT3G23060,AT3G23070,AT3G23080
Chr3	9589000	9590000	Chr3	9590000	9591000	2000	3.30103	167	2.62169e-10	2.02177e-06	9589000	9590000	9590000	9591000	167	1	AT3G26200	AT3G26200,AT3G26210,AT3G26220
Chr3	17543000	17544000	Chr3	17544000	17545000	2000	3.30103	31	2.6512e-05	0.0224793	17543000	17544000	17544000	17545000	31	1	AT3G47600	AT3G47610
Chr3	16818000	16819000	Chr3	16819000	16820000	2000	3.30103	59	1.08441e-08	4.70923e-05	16818000	16819000	16819000	16820000	59	1	AT3G45780	AT3G45780
Chr3	4798000	4799000	Chr3	4799000	4800000	2000	3.30103	164	1.34778e-13	2.80179e-09	4798000	4799000	4799000	4800000	164	1	AT3G14360,AT3G14362,AT3G14370	AT3G14370,AT3G14380,AT3G14385,AT3G14390
Chr3	6488000	6489000	Chr3	6489000	6490000	2000	3.30103	110	4.94104e-07	0.00102849	6488000	6489000	6489000	6490000	110	1	AT3G18827,AT3G18830	AT3G18830,AT3G18840,AT3G18850
Chr3	6267000	6268000	Chr3	6268000	6269000	2000	3.30103	187	3.55904e-11	3.66739e-07	6267000	6268000	6268000	6269000	187	1	AT3G18240,AT3G18250,AT3G18260,AT3G18270,AT3G18280	AT3G18282
Chr3	6117000	6118000	Chr3	6118000	6119000	2000	3.30103	36	7.37911e-06	0.00853446	6117000	6118000	6118000	6119000	36	1	AT3G17840,AT3G17845,AT3G17850	AT3G17860,AT3G17880,AT3G17890,AT3G17900
Chr3	20876000	20877000	Chr3	20877000	20878000	2000	3.30103	115	3.04194e-05	0.0247647	20876000	20877000	20877000	20878000	115	1	AT3G56260,AT3G56270	AT3G56290,AT3G56300,AT3G56310
Chr3	4619000	4620000	Chr3	4620000	4621000	2000	3.30103	164	6.48209e-08	0.000203097	4619000	4620000	4620000	4621000	164	1	AT3G13980	AT3G13980
Chr3	19928000	19929000	Chr3	19929000	19930000	2000	3.30103	121	3.8206e-07	0.000844534	19928000	19929000	19929000	19930000	121	1	AT3G53760,AT3G53770,AT3G53775,AT3G53780,AT3G53790	AT3G53790,AT3G53800,AT3G53810
Chr4	64000	65000	Chr4	65000	66000	2000	3.30103	65	3.27356e-10	2.4571e-06	61000	65000	62000	67000	532	0.5	AT4G00160	AT4G00160
Chr4	18404000	18405000	Chr4	18405000	18406000	2000	3.30103	173	2.10738e-12	3.11949e-08	18400000	18405000	18402000	18406000	879	0.45	AT4G39650	AT4G39650
Chr4	560000	561000	Chr4	561000	562000	2000	3.30103	129	1.54741e-07	0.000409893	559000	562000	561000	564000	412	0.666667	AT4G01350	AT4G01350,AT4G01355
Chr4	10530000	10531000	Chr4	10531000	10532000	2000	3.30103	52	1.52965e-09	8.90823e-06	10526000	10531000	10530000	10532000	195	0.5	NA	AT4G19250,AT4G19260,AT4G19270
Chr4	5917000	5918000	Chr4	5918000	5919000	2000	3.30103	90	1.00148e-12	1.65115e-08	5914000	5918000	5917000	5919000	267	0.625	NA	AT4G09320,AT4G09340
Chr4	17376000	17377000	Chr4	17377000	17378000	2000	3.30103	49	2.95184e-08	0.000107083	17374000	17378000	17377000	17379000	203	0.625	AT4G36880	AT4G36890
Chr4	16716000	16717000	Chr4	16717000	16718000	2000	3.30103	178	1.82111e-14	4.60699e-10	16716000	16718000	16717000	16720000	471	0.833333	AT4G35110,AT4G35120	AT4G35120,AT4G35130
Chr4	9563000	9564000	Chr4	9564000	9565000	2000	3.30103	37	1.42684e-05	0.014192	9560000	9564000	9562000	9565000	330	0.416667	AT4G16990	AT4G16990,AT4G17000
Chr4	302000	303000	Chr4	303000	304000	2000	3.30103	124	6.66257e-16	2.69961e-11	300000	303000	302000	305000	306	0.555556	AT4G00710,AT4G00720,AT4G00730	AT4G00730
Chr4	18521000	18522000	Chr4	18522000	18523000	2000	3.30103	76	1.51494e-16	7.24332e-12	18519000	18523000	18521000	18524000	225	0.333333	AT4G39940	NA
Chr4	5713000	5714000	Chr4	5714000	5715000	2000	3.30103	130	1.50568e-12	2.33471e-08	5712000	5715000	5714000	5717000	316	0.444444	AT4G08910	NA
Chr4	10299000	10300000	Chr4	10300000	10301000	2000	3.30103	88	7.84676e-18	5.00232e-13	10298000	10301000	10300000	10302000	291	0.666667	AT4G18710,AT4G18720	AT4G18710,AT4G18720,AT4G18725,AT4G18730,AT4G18740
Chr4	13682000	13683000	Chr4	13683000	13684000	2000	3.30103	161	4.56522e-12	6.09707e-08	13681000	13683000	13682000	13685000	410	0.666667	AT4G27320,AT4G27330	AT4G27330,AT4G27340,AT4G27350
Chr4	2725000	2726000	Chr4	2726000	2727000	2000	3.30103	93	1.41303e-10	1.20429e-06	2724000	2727000	2726000	2728000	292	0.666667	AT4G05330,AT4G05340	AT4G05340,AT4G05350
Chr4	5855000	5856000	Chr4	5856000	5857000	2000	3.30103	63	3.25127e-12	4.51794e-08	5853000	5856000	5855000	5857000	121	0.5	AT4G09180,AT4G09190	AT4G09190,AT4G09200
Chr4	17313000	17314000	Chr4	17314000	17315000	2000	3.30103	41	6.20088e-11	5.8197e-07	17313000	17314000	17314000	17317000	87	1	AT4G36720,AT4G36730	AT4G36740
Chr4	17752000	17753000	Chr4	17753000	17754000	2000	3.30103	217	3.30002e-30	1.43439e-24	17751000	17753000	17753000	17755000	287	0.75	AT4G37770	AT4G37770
Chr4	844000	845000	Chr4	845000	846000	2000	3.30103	173	6.87036e-15	1.99085e-10	844000	846000	845000	847000	434	0.75	AT4G01940,AT4G01950	AT4G01950,AT4G01960
Chr4	14875000	14876000	Chr4	14876000	14877000	2000	3.30103	75	3.00512e-06	0.00424593	14874000	14877000	14876000	14878000	187	0.5	NA	NA
Chr4	6616000	6617000	Chr4	6617000	6618000	2000	3.30103	144	2.8539e-07	0.000669213	6615000	6617000	6616000	6618000	323	0.75	NA	AT4G10740,AT4G10750,AT4G10760
Chr4	962000	963000	Chr4	963000	964000	2000	3.30103	203	1.55833e-08	6.38553e-05	960000	963000	963000	964000	480	1	AT4G02180	AT4G02180
Chr4	2715000	2716000	Chr4	2716000	2717000	2000	3.30103	180	6.05167e-13	1.05601e-08	2714000	2716000	2715000	2718000	432	0.5	AT4G05310	AT4G05310,AT4G05320
Chr4	7220000	7221000	Chr4	7221000	7222000	2000	3.30103	216	3.69175e-08	0.000128747	7220000	7221000	7221000	7224000	539	1	AT4G12030,AT4G12040,AT4G12050	AT4G12050
Chr4	16395000	16396000	Chr4	16396000	16397000	2000	3.30103	105	1.65993e-08	6.71878e-05	16394000	16396000	16395000	16397000	312	0.75	AT4G34250	AT4G34250,AT4G34260,AT4G34265,AT4G34270,AT4G34272,AT4G34280
Chr4	17692000	17693000	Chr4	17693000	17694000	2000	3.30103	252	2.39597e-14	5.87475e-10	17692000	17694000	17693000	17695000	484	0.75	AT4G37650	AT4G37650,AT4G37660,AT4G37670,AT4G37680
Chr4	18204000	18205000	Chr4	18205000	18206000	2000	3.30103	114	1.13788e-19	1.03581e-14	18203000	18205000	18204000	18206000	243	0.75	AT4G39050,AT4G39060,AT4G39070	AT4G39070,AT4G39080,AT4G39090
Chr4	17580000	17581000	Chr4	17581000	17582000	2000	3.30103	267	3.07505e-18	2.10037e-13	17579000	17581000	17580000	17582000	493	0.75	AT4G37390	AT4G37390
Chr4	2624000	2625000	Chr4	2625000	2626000	2000	3.30103	58	2.42322e-07	0.000589022	2623000	2626000	2624000	2627000	144	0.333333	NA	AT4G05105
Chr4	17758000	17759000	Chr4	17759000	17760000	2000	3.30103	67	2.97405e-13	5.62043e-09	17757000	17759000	17758000	17760000	168	0.75	AT4G37780	AT4G37780
Chr4	7258000	7259000	Chr4	7259000	7260000	2000	3.30103	60	6.92601e-07	0.00135551	7258000	7259000	7259000	7261000	123	1	AT4G12110,AT4G12115,AT4G12120	AT4G12120
Chr4	16251000	16252000	Chr4	16252000	16253000	2000	3.30103	170	1.86877e-13	3.72748e-09	16250000	16252000	16252000	16253000	289	1	AT4G33890,AT4G33900	AT4G33900,AT4G33905,AT4G33910
Chr4	9766000	9767000	Chr4	9767000	9768000	2000	3.30103	58	5.16192e-06	0.00645748	9766000	9767000	9767000	9769000	114	1	AT4G17505,AT4G17510	AT4G17510
Chr4	13642000	13643000	Chr4	13643000	13644000	2000	3.30103	110	8.25028e-06	0.00933429	13641000	13643000	13643000	13644000	190	1	AT4G27240,AT4G27250	AT4G27250
Chr4	17584000	17585000	Chr4	17585000	17586000	2000	3.30103	138	3.72674e-07	0.000829153	17584000	17586000	17585000	17587000	187	0.5	AT4G37400	AT4G37400
Chr4	7681000	7682000	Chr4	7682000	7683000	2000	3.30103	51	2.15129e-05	0.0193162	7680000	7682000	7682000	7683000	88	1	AT4G13240	AT4G13240,AT4G13245,AT4G13250
Chr4	12415000	12416000	Chr4	12416000	12417000	2000	3.30103	44	4.03973e-08	0.000138657	12414000	12416000	12415000	12417000	87	0.5	AT4G23850,AT4G23860,AT4G23870,AT4G23880	AT4G23880
Chr4	1177000	1178000	Chr4	1178000	1179000	2000	3.30103	75	2.21739e-06	0.00337425	1176000	1178000	1178000	1179000	140	1	AT4G02670	AT4G02670,AT4G02680
Chr4	16387000	16388000	Chr4	16388000	16389000	2000	3.30103	138	1.67518e-20	1.70414e-15	16386000	16388000	16388000	16389000	187	1	AT4G34230	AT4G34230,AT4G34240
Chr4	723000	724000	Chr4	724000	725000	2000	3.30103	22	3.62922e-07	0.000810095	722000	724000	724000	725000	32	1	NA	NA
Chr4	7366000	7367000	Chr4	7367000	7368000	2000	3.30103	61	9.91951e-08	0.000287093	7365000	7367000	7367000	7368000	95	1	AT4G12430,AT4G12432	AT4G12430,AT4G12432
Chr4	9895000	9896000	Chr4	9896000	9897000	2000	3.30103	116	4.77178e-10	3.34043e-06	9894000	9896000	9896000	9897000	178	1	AT4G17790,AT4G17800	AT4G17800
Chr4	17650000	17651000	Chr4	17651000	17652000	2000	3.30103	43	3.44764e-06	0.00470435	17650000	17651000	17651000	17653000	96	1	NA	NA
Chr4	10250000	10251000	Chr4	10251000	10252000	2000	3.30103	58	4.66428e-10	3.27958e-06	10250000	10251000	10251000	10253000	93	1	AT4G18600,AT4G18610	AT4G18610,AT4G18620
Chr4	12504000	12505000	Chr4	12505000	12506000	2000	3.30103	180	1.97702e-19	1.71866e-14	12503000	12505000	12505000	12506000	224	1	AT4G24060	AT4G24060,AT4G24070,AT4G24080,AT4G24090
Chr4	720000	721000	Chr4	721000	722000	2000	3.30103	29	1.07196e-07	0.000305442	719000	721000	721000	722000	51	1	AT4G01680	NA
Chr4	14361000	14362000	Chr4	14362000	14363000	2000	3.30103	29	5.29261e-06	0.00658479	14361000	14362000	14362000	14364000	56	1	NA	NA
Chr4	11102000	11103000	Chr4	11103000	11104000	2000	3.30103	33	1.59755e-09	9.24733e-06	11102000	11104000	11103000	11105000	80	0.5	NA	AT4G20720
Chr4	17796000	17797000	Chr4	17797000	17798000	2000	3.30103	129	8.66218e-10	5.57552e-06	17795000	17797000	17797000	17798000	196	1	AT4G37850	AT4G37850
Chr4	747000	748000	Chr4	748000	749000	2000	3.30103	39	2.40615e-10	1.88236e-06	746000	748000	748000	749000	72	1	AT4G01720	AT4G01720,AT4G01730,AT4G01735,AT4G01740,AT4G01750
Chr4	9963000	9964000	Chr4	9964000	9965000	2000	3.30103	96	1.35569e-07	0.000371244	9963000	9964000	9964000	9966000	173	1	AT4G17910,AT4G17920	AT4G17920,AT4G17930,AT4G17940,AT4G17950
Chr4	9441000	9442000	Chr4	9442000	9443000	2000	3.30103	44	1.30851e-12	2.09242e-08	9441000	9442000	9442000	9444000	62	1	NA	NA
Chr4	14889000	14890000	Chr4	14890000	14891000	2000	3.30103	100	6.97504e-09	3.26196e-05	14888000	14890000	14889000	14891000	165	0.5	AT4G30460	AT4G30470,AT4G30480,AT4G30490
Chr4	9323000	9324000	Chr4	9324000	9325000	2000	3.30103	167	4.50538e-08	0.000151274	9323000	9324000	9324000	9326000	258	1	AT4G16550	AT4G16550,AT4G16560
Chr4	13018000	13019000	Chr4	13019000	13020000	2000	3.30103	65	8.48893e-19	6.54641e-14	13018000	13020000	13019000	13021000	96	0.5	AT4G25470,AT4G25480	AT4G25480,AT4G25490
Chr4	18053000	18054000	Chr4	18054000	18055000	2000	3.30103	52	9.89272e-12	1.17078e-07	18053000	18055000	18054000	18056000	105	0.5	AT4G38620	AT4G38620,AT4G38630,AT4G38640,AT4G38650
Chr4	1605000	1606000	Chr4	1606000	1607000	2000	3.30103	77	2.84911e-06	0.00408466	1605000	1606000	1606000	1608000	146	1	AT4G03610	AT4G03610,AT4G03620
Chr4	499000	500000	Chr4	500000	501000	2000	3.30103	74	3.01037e-06	0.00425085	499000	500000	500000	502000	100	1	AT4G01160,AT4G01170	AT4G01170,AT4G01180
Chr4	42000	43000	Chr4	43000	44000	2000	3.30103	54	8.0402e-08	0.000241472	41000	43000	42000	44000	140	0.5	AT4G00120	AT4G00120,AT4G00124
Chr4	11418000	11419000	Chr4	11419000	11420000	2000	3.30103	65	2.1318e-08	8.28675e-05	11418000	11419000	11419000	11421000	103	1	AT4G21430,AT4G21440	AT4G21440,AT4G21445,AT4G21450
Chr4	13918000	13919000	Chr4	13919000	13920000	2000	3.30103	184	1.31152e-16	6.39869e-12	13917000	13919000	13919000	13920000	254	1	AT4G27950,AT4G27960,AT4G27970	AT4G27970,AT4G27980,AT4G27990,AT4G28000,AT4G28005
Chr4	17347000	17348000	Chr4	17348000	17349000	2000	3.30103	64	2.45972e-12	3.57194e-08	17346000	17348000	17347000	17349000	91	0.5	AT4G36790,AT4G36791,AT4G36800,AT4G36808,AT4G36810,AT4G36820	AT4G36830
Chr4	14844000	14845000	Chr4	14845000	14846000	2000	3.30103	27	9.46693e-06	0.0103437	14844000	14845000	14845000	14847000	60	1	AT4G30320,AT4G30330,AT4G30340	AT4G30350,AT4G30360
Chr4	17639000	17640000	Chr4	17640000	17641000	2000	3.30103	84	3.80321e-16	1.66827e-11	17639000	17640000	17640000	17642000	108	1	AT4G37540	AT4G37540
Chr4	15933000	15934000	Chr4	15934000	15935000	2000	3.30103	95	5.62012e-13	1.00266e-08	15932000	15934000	15934000	15935000	201	1	AT4G33000,AT4G33010,AT4G33020	AT4G33020,AT4G33030
Chr4	11001000	11002000	Chr4	11002000	11003000	2000	3.30103	77	2.85026e-09	1.51818e-05	11001000	11003000	11002000	11004000	115	0.5	AT4G20370	AT4G20370,AT4G20380,AT4G20390,AT4G20400
Chr4	17983000	17984000	Chr4	17984000	17985000	2000	3.30103	124	1.32593e-08	5.57573e-05	17983000	17984000	17984000	17985000	124	1	AT4G38390,AT4G38400,AT4G38401,AT4G38405,AT4G38410,AT4G38420	AT4G38420,AT4G38430,AT4G38440,AT4G38460
Chr4	14791000	14792000	Chr4	14792000	14793000	2000	3.30103	48	1.05315e-09	6.52252e-06	14791000	14792000	14792000	14793000	48	1	NA	AT4G30210
Chr4	10282000	10283000	Chr4	10283000	10284000	2000	3.30103	107	1.16654e-11	1.36704e-07	10282000	10283000	10283000	10284000	107	1	AT4G18690	AT4G18690,AT4G18692
Chr4	14447000	14448000	Chr4	14448000	14449000	2000	3.30103	97	1.17332e-07	0.000329996	14447000	14448000	14448000	14449000	97	1	AT4G29330,AT4G29340	AT4G29340,AT4G29350,AT4G29360,AT4G29370,AT4G29380
Chr4	17137000	17138000	Chr4	17138000	17139000	2000	3.30103	81	9.4821e-12	1.13058e-07	17137000	17138000	17138000	17139000	81	1	AT4G36195,AT4G36197,AT4G36210,AT4G36220	AT4G36220
Chr4	32000	33000	Chr4	33000	34000	2000	3.30103	93	6.17264e-16	2.52248e-11	32000	33000	33000	34000	93	1	AT4G00080	AT4G00080,AT4G00085,AT4G00090
Chr4	5646000	5647000	Chr4	5647000	5648000	2000	3.30103	37	3.54582e-05	0.0277607	5646000	5647000	5647000	5648000	37	1	AT4G08870	AT4G08870
Chr4	17597000	17598000	Chr4	17598000	17599000	2000	3.30103	169	4.8631e-15	1.44421e-10	17597000	17598000	17598000	17599000	169	1	AT4G37430,AT4G37432	AT4G37430,AT4G37432,AT4G37440,AT4G37445,AT4G37450,AT4G37460
Chr4	13304000	13305000	Chr4	13305000	13306000	2000	3.30103	156	2.76436e-06	0.00400123	13304000	13305000	13305000	13306000	156	1	AT4G26255,AT4G26260,AT4G26270,AT4G26280	AT4G26280,AT4G26288,AT4G26290,AT4G26300,AT4G26310
Chr4	13867000	13868000	Chr4	13868000	13869000	2000	3.30103	77	1.16736e-05	0.0121786	13867000	13868000	13868000	13869000	77	1	AT4G27830,AT4G27840	NA
Chr4	11734000	11735000	Chr4	11735000	11736000	2000	3.30103	126	7.79662e-05	0.0496189	11734000	11735000	11735000	11736000	126	1	AT4G22130,AT4G22140,AT4G22150,AT4G22160,AT4G22165	AT4G22165
Chr4	11643000	11644000	Chr4	11644000	11645000	2000	3.30103	48	9.43703e-06	0.0103275	11643000	11644000	11644000	11645000	48	1	AT4G21940	AT4G21950,AT4G21960
Chr4	4070000	4071000	Chr4	4071000	4072000	2000	3.30103	93	1.14972e-16	5.78641e-12	4070000	4071000	4071000	4072000	93	1	AT4G06744	AT4G06744,AT4G06746
Chr4	2627000	2628000	Chr4	2628000	2629000	2000	3.30103	51	3.96362e-05	0.0301577	2627000	2628000	2628000	2629000	51	1	AT4G05110	AT4G05110,AT4G05120,AT4G05130
Chr4	15380000	15381000	Chr4	15381000	15382000	2000	3.30103	22	1.29426e-05	0.0131888	15380000	15381000	15381000	15382000	22	1	AT4G31780,AT4G31790	AT4G31800,AT4G31805
Chr4	14935000	14936000	Chr4	14936000	14937000	2000	3.30103	28	7.11064e-05	0.046407	14935000	14936000	14936000	14937000	28	1	AT4G30570,AT4G30580,AT4G30590	AT4G30590,AT4G30600,AT4G30610
Chr4	12464000	12465000	Chr4	12465000	12466000	2000	3.30103	123	1.63126e-10	1.36354e-06	12464000	12465000	12465000	12466000	123	1	AT4G23980,AT4G23990,AT4G24000	AT4G24000,AT4G24010,AT4G24015
Chr4	5579000	5580000	Chr4	5580000	5581000	2000	3.30103	144	3.87912e-09	1.97777e-05	5579000	5580000	5580000	5581000	144	1	AT4G08730,AT4G08740	NA
Chr4	16438000	16439000	Chr4	16439000	16440000	2000	3.30103	132	4.76373e-14	1.09503e-09	16438000	16439000	16439000	16440000	132	1	AT4G34370,AT4G34380	AT4G34380
Chr4	17187000	17188000	Chr4	17188000	17189000	2000	3.30103	74	2.10818e-11	2.33136e-07	17187000	17188000	17188000	17189000	74	1	AT4G36370,AT4G36380	AT4G36380
Chr4	2445000	2446000	Chr4	2446000	2447000	2000	3.30103	40	2.82376e-05	0.0234599	2445000	2446000	2446000	2447000	40	1	AT4G04830	AT4G04830
Chr4	17004000	17005000	Chr4	17005000	17006000	2000	3.30103	71	6.43818e-07	0.00128048	17004000	17005000	17005000	17006000	71	1	AT4G35900	AT4G35900,AT4G35905,AT4G35910,AT4G35920
Chr4	9739000	9740000	Chr4	9740000	9741000	2000	3.30103	83	1.68769e-15	5.80525e-11	9739000	9740000	9740000	9741000	83	1	AT4G17453,AT4G17460	AT4G17460
Chr4	12067000	12068000	Chr4	12068000	12069000	2000	3.30103	70	9.24957e-08	0.000270984	12067000	12068000	12068000	12069000	70	1	AT4G23000,AT4G23010,AT4G23020	AT4G23020,AT4G23030
Chr4	14244000	14245000	Chr4	14245000	14246000	2000	3.30103	161	3.53217e-05	0.0276797	14244000	14245000	14245000	14246000	161	1	AT4G28840,AT4G28850	AT4G28850,AT4G28860,AT4G28870,AT4G28880
Chr4	8457000	8458000	Chr4	8458000	8459000	2000	3.30103	43	2.73945e-06	0.00398081	8457000	8458000	8458000	8459000	43	1	NA	NA
Chr4	8448000	8449000	Chr4	8449000	8450000	2000	3.30103	138	7.40689e-07	0.00142398	8448000	8449000	8449000	8450000	138	1	AT4G14730	AT4G14730,AT4G14740
Chr4	13778000	13779000	Chr4	13779000	13780000	2000	3.30103	19	3.21826e-05	0.025835	13778000	13779000	13779000	13780000	19	1	NA	AT4G27600,AT4G27610,AT4G27620
Chr4	7705000	7706000	Chr4	7706000	7707000	2000	3.30103	78	2.15336e-06	0.00329465	7705000	7706000	7706000	7707000	78	1	AT4G13266	AT4G13266
Chr4	18387000	18388000	Chr4	18388000	18389000	2000	3.30103	263	4.08897e-11	4.09005e-07	18387000	18388000	18388000	18389000	263	1	AT4G39550,AT4G39560,AT4G39570,AT4G39580,AT4G39590	AT4G39590,AT4G39600
Chr4	15867000	15868000	Chr4	15868000	15869000	2000	3.30103	52	4.23019e-07	0.000914774	15867000	15868000	15868000	15869000	52	1	AT4G32880	AT4G32880,AT4G32890,AT4G32900
Chr4	18410000	18411000	Chr4	18411000	18412000	2000	3.30103	117	1.28415e-08	5.42389e-05	18410000	18411000	18411000	18412000	117	1	AT4G39660,AT4G39670	AT4G39672
Chr4	6049000	6050000	Chr4	6050000	6051000	2000	3.30103	73	7.24681e-05	0.0470901	6049000	6050000	6050000	6051000	73	1	AT4G09570	AT4G09570,AT4G09580
Chr4	16661000	16662000	Chr4	16662000	16663000	2000	3.30103	62	4.42135e-06	0.00573044	16661000	16662000	16662000	16663000	62	1	AT4G34980,AT4G34990	AT4G34990
Chr4	13121000	13122000	Chr4	13122000	13123000	2000	3.30103	71	2.05347e-05	0.01868	13121000	13122000	13122000	13123000	71	1	AT4G25770,AT4G25780	AT4G25790
Chr4	14576000	14577000	Chr4	14577000	14578000	2000	3.30103	95	1.16293e-05	0.0121505	14576000	14577000	14577000	14578000	95	1	AT4G29750,AT4G29760,AT4G29770	AT4G29770,AT4G29780
Chr4	10280000	10281000	Chr4	10281000	10282000	2000	3.30103	138	2.33838e-09	1.27922e-05	10280000	10281000	10281000	10282000	138	1	NA	AT4G18680
Chr4	10357000	10358000	Chr4	10358000	10359000	2000	3.30103	114	2.86085e-05	0.0236966	10357000	10358000	10358000	10359000	114	1	AT4G18900	AT4G18900,AT4G18905
Chr4	16263000	16264000	Chr4	16264000	16265000	2000	3.30103	61	1.31314e-06	0.00224793	16263000	16264000	16264000	16265000	61	1	AT4G33920,AT4G33925	AT4G33925,AT4G33930,AT4G33940,AT4G33945,AT4G33950
Chr4	10142000	10143000	Chr4	10143000	10144000	2000	3.30103	84	4.79417e-06	0.0060947	10142000	10143000	10143000	10144000	84	1	AT4G18340,AT4G18350	AT4G18350,AT4G18360,AT4G18370,AT4G18372,AT4G18375
Chr4	18304000	18305000	Chr4	18305000	18306000	2000	3.30103	45	3.09269e-06	0.00434655	18304000	18305000	18305000	18306000	45	1	AT4G39361	AT4G39361,AT4G39363,AT4G39364,AT4G39366,AT4G39370,AT4G39380,AT4G39390
Chr4	17400000	17401000	Chr4	17401000	17402000	2000	3.30103	16	5.6717e-05	0.0392842	17400000	17401000	17401000	17402000	16	1	AT4G36920	AT4G36920,AT4G36925
Chr4	16597000	16598000	Chr4	16598000	16599000	2000	3.30103	52	7.18025e-10	4.74836e-06	16597000	16598000	16598000	16599000	52	1	AT4G34800	AT4G34810,AT4G34830,AT4G34840,AT4G34850
Chr4	11653000	11654000	Chr4	11654000	11655000	2000	3.30103	54	7.15056e-08	0.000220288	11653000	11654000	11654000	11655000	54	1	AT4G21970	AT4G21970,AT4G21980,AT4G21990,AT4G22000
Chr4	18427000	18428000	Chr4	18428000	18429000	2000	3.30103	137	3.60541e-21	4.10438e-16	18427000	18428000	18428000	18429000	137	1	AT4G39710	AT4G39710
Chr4	9926000	9927000	Chr4	9927000	9928000	2000	3.30103	41	3.21073e-06	0.00446779	9926000	9927000	9927000	9928000	41	1	AT4G17860	AT4G17870,AT4G17880,AT4G17890
Chr4	11669000	11670000	Chr4	11670000	11671000	2000	3.30103	87	1.9542e-07	0.000496206	11669000	11670000	11670000	11671000	87	1	AT4G22010	NA
Chr4	16917000	16918000	Chr4	16918000	16919000	2000	3.30103	145	2.26885e-05	0.0201	16917000	16918000	16918000	16919000	145	1	AT4G35670,AT4G35680	AT4G35680,AT4G35690
Chr4	9846000	9847000	Chr4	9847000	9848000	2000	3.30103	32	2.88195e-05	0.0238274	9846000	9847000	9847000	9848000	32	1	AT4G17690	AT4G17690
Chr4	7660000	7661000	Chr4	7661000	7662000	2000	3.30103	46	1.87469e-05	0.0174453	7660000	7661000	7661000	7662000	46	1	AT4G13190	AT4G13190,AT4G13195
Chr4	9351000	9352000	Chr4	9352000	9353000	2000	3.30103	133	7.55345e-07	0.00144506	9351000	9352000	9352000	9353000	133	1	AT4G16580,AT4G16590,AT4G16600	AT4G16600,AT4G16610,AT4G16620
Chr4	9367000	9368000	Chr4	9368000	9369000	2000	3.30103	38	1.52086e-05	0.0148849	9367000	9368000	9368000	9369000	38	1	AT4G16630,AT4G16640	AT4G16640,AT4G16650,AT4G16660
Chr4	1447000	1448000	Chr4	1448000	1449000	2000	3.30103	106	3.33783e-08	0.000118478	1447000	1448000	1448000	1449000	106	1	AT4G03290,AT4G03292,AT4G03295,AT4G03298	NA
Chr4	2771000	2772000	Chr4	2772000	2773000	2000	3.30103	82	4.15774e-05	0.0312468	2771000	2772000	2772000	2773000	82	1	AT4G05490	AT4G05490
Chr4	1027000	1028000	Chr4	1028000	1029000	2000	3.30103	40	2.32223e-05	0.0204516	1027000	1028000	1028000	1029000	40	1	NA	AT4G02325
Chr4	8392000	8393000	Chr4	8393000	8394000	2000	3.30103	78	1.1386e-05	0.0119673	8392000	8393000	8393000	8394000	78	1	AT4G14620,AT4G14622,AT4G14630	AT4G14630
Chr4	979000	980000	Chr4	980000	981000	2000	3.30103	60	1.512e-06	0.00250148	979000	980000	980000	981000	60	1	AT4G02210,AT4G02220,AT4G02230	AT4G02230,AT4G02235
Chr4	11305000	11306000	Chr4	11306000	11307000	2000	3.30103	77	7.4428e-06	0.00857906	11305000	11306000	11306000	11307000	77	1	AT4G21200	AT4G21200,AT4G21210,AT4G21213,AT4G21215,AT4G21216,AT4G21220
Chr4	13275000	13276000	Chr4	13276000	13277000	2000	3.30103	193	3.37242e-05	0.0267759	13275000	13276000	13276000	13277000	193	1	AT4G26190,AT4G26200	AT4G26200,AT4G26210,AT4G26220,AT4G26225,AT4G26230,AT4G26240
Chr4	1022000	1023000	Chr4	1023000	1024000	2000	3.30103	41	1.86603e-05	0.0173849	1022000	1023000	1023000	1024000	41	1	AT4G02320	AT4G02320
Chr4	18454000	18455000	Chr4	18455000	18456000	2000	3.30103	25	2.53759e-05	0.0217943	18454000	18455000	18455000	18456000	25	1	NA	NA
Chr4	128000	129000	Chr4	129000	130000	2000	3.30103	78	4.40263e-06	0.00571703	128000	129000	129000	130000	78	1	AT4G00300	AT4G00300
Chr4	8541000	8542000	Chr4	8542000	8543000	2000	3.30103	125	1.61518e-09	9.31555e-06	8541000	8542000	8542000	8543000	125	1	AT4G14930,AT4G14940	AT4G14940,AT4G14950
Chr4	11626000	11627000	Chr4	11627000	11628000	2000	3.30103	75	2.68903e-06	0.0039186	11626000	11627000	11627000	11628000	75	1	AT4G21910	AT4G21910
Chr4	17766000	17767000	Chr4	17767000	17768000	2000	3.30103	16	1.35833e-07	0.000371379	17766000	17767000	17767000	17768000	16	1	NA	AT4G37790
Chr4	7439000	7440000	Chr4	7440000	7441000	2000	3.30103	41	2.90237e-05	0.0239299	7439000	7440000	7440000	7441000	41	1	AT4G12545,AT4G12550	AT4G12560,AT4G12570,AT4G12580
Chr4	13130000	13131000	Chr4	13131000	13132000	2000	3.30103	144	4.60402e-09	2.28826e-05	13130000	13131000	13131000	13132000	144	1	AT4G25820	AT4G25820,AT4G25830,AT4G25835,AT4G25840
Chr4	2780000	2781000	Chr4	2781000	2782000	2000	3.30103	103	3.22765e-07	0.000735919	2780000	2781000	2781000	2782000	103	1	NA	NA
Chr4	14344000	14345000	Chr4	14345000	14346000	2000	3.30103	80	2.56019e-05	0.0219214	14344000	14345000	14345000	14346000	80	1	AT4G29100	AT4G29103
Chr4	14411000	14412000	Chr4	14412000	14413000	2000	3.30103	85	2.16392e-08	8.39111e-05	14411000	14412000	14412000	14413000	85	1	AT4G29230	AT4G29230
Chr4	6635000	6636000	Chr4	6636000	6637000	2000	3.30103	87	2.63039e-05	0.0223596	6635000	6636000	6636000	6637000	87	1	AT4G10767,AT4G10770,AT4G10780	AT4G10780,AT4G10790,AT4G10800,AT4G10810,AT4G10815
Chr4	11557000	11558000	Chr4	11558000	11559000	2000	3.30103	285	1.28637e-07	0.000355518	11557000	11558000	11558000	11559000	285	1	AT4G21745,AT4G21750	AT4G21750,AT4G21760,AT4G21770,AT4G21780
Chr4	1272000	1273000	Chr4	1273000	1274000	2000	3.30103	84	1.04245e-09	6.47305e-06	1272000	1273000	1273000	1274000	84	1	AT4G02840,AT4G02850,AT4G02860,AT4G02870,AT4G02871	AT4G02880,AT4G02890
Chr4	5667000	5668000	Chr4	5668000	5669000	2000	3.30103	171	2.20404e-05	0.0196459	5667000	5668000	5668000	5669000	171	1	NA	AT4G08868
Chr4	18301000	18302000	Chr4	18302000	18303000	2000	3.30103	83	5.34099e-08	0.000173955	18301000	18302000	18302000	18303000	83	1	AT4G39350	AT4G39350,AT4G39360
Chr4	16701000	16702000	Chr4	16702000	16703000	2000	3.30103	110	1.03859e-10	9.16381e-07	16701000	16702000	16702000	16703000	110	1	AT4G35090	AT4G35090,AT4G35100
Chr4	17575000	17576000	Chr4	17576000	17577000	2000	3.30103	43	4.65606e-06	0.00595236	17575000	17576000	17576000	17577000	43	1	NA	NA
Chr4	15863000	15864000	Chr4	15864000	15865000	2000	3.30103	100	8.05221e-10	5.25952e-06	15863000	15864000	15864000	15865000	100	1	AT4G32850,AT4G32860,AT4G32870,AT4G32880	AT4G32880
Chr4	15210000	15211000	Chr4	15211000	15212000	2000	3.30103	103	4.13532e-05	0.031093	15210000	15211000	15211000	15212000	103	1	NA	AT4G31350
Chr4	14825000	14826000	Chr4	14826000	14827000	2000	3.30103	53	9.79e-08	0.000284032	14825000	14826000	14826000	14827000	53	1	AT4G30270,AT4G30280	AT4G30280,AT4G30290,AT4G30300,AT4G30310
Chr4	14638000	14639000	Chr4	14639000	14640000	2000	3.30103	82	7.09503e-07	0.00138011	14638000	14639000	14639000	14640000	82	1	NA	AT4G29930,AT4G29940
Chr4	11984000	11985000	Chr4	11985000	11986000	2000	3.30103	372	2.38709e-22	3.45858e-17	11984000	11985000	11985000	11986000	372	1	AT4G22785,AT4G22790,AT4G22800,AT4G22810	AT4G22810,AT4G22820,AT4G22830,AT4G22840,AT4G22850
Chr4	10596000	10597000	Chr4	10597000	10598000	2000	3.30103	40	5.0263e-05	0.0360193	10596000	10597000	10597000	10598000	40	1	AT4G19420	AT4G19430,AT4G19440,AT4G19450
Chr4	5643000	5644000	Chr4	5644000	5645000	2000	3.30103	10	1.53433e-05	0.0149837	5643000	5644000	5644000	5645000	10	1	NA	NA
Chr4	11900000	11901000	Chr4	11901000	11902000	2000	3.30103	146	1.16966e-05	0.0121972	11900000	11901000	11901000	11902000	146	1	AT4G22600	AT4G22600,AT4G22610
Chr4	13092000	13093000	Chr4	13093000	13094000	2000	3.30103	72	2.06539e-07	0.000518306	13092000	13093000	13093000	13094000	72	1	AT4G25650,AT4G25660,AT4G25670,AT4G25672,AT4G25680,AT4G25692,AT4G25690	AT4G25700,AT4G25707,AT4G25710,AT4G25719,AT4G25720
Chr4	2668000	2669000	Chr4	2669000	2670000	2000	3.30103	57	1.15497e-06	0.00202949	2668000	2669000	2669000	2670000	57	1	AT4G05170	AT4G05170,AT4G05180
Chr4	15940000	15941000	Chr4	15941000	15942000	2000	3.30103	29	2.52657e-12	3.6386e-08	15940000	15941000	15941000	15942000	29	1	AT4G33040	AT4G33040,AT4G33050,AT4G33060
Chr4	9318000	9319000	Chr4	9319000	9320000	2000	3.30103	127	3.47529e-08	0.000122269	9318000	9319000	9319000	9320000	127	1	AT4G16550	AT4G16550
Chr4	556000	557000	Chr4	557000	558000	2000	3.30103	84	3.76974e-07	0.000835998	556000	557000	557000	558000	84	1	AT4G01340	NA
Chr4	17090000	17091000	Chr4	17091000	17092000	2000	3.30103	61	7.17648e-05	0.0467411	17090000	17091000	17091000	17092000	61	1	AT4G36110	AT4G36120,AT4G36130
Chr4	15975000	15976000	Chr4	15976000	15977000	2000	3.30103	87	1.71953e-10	1.42488e-06	15975000	15976000	15976000	15977000	87	1	AT4G33090,AT4G33100,AT4G33110,AT4G33120	AT4G33120
Chr4	486000	487000	Chr4	487000	488000	2000	3.30103	64	1.63146e-11	1.84845e-07	486000	487000	487000	488000	64	1	AT4G01100,AT4G01110,AT4G01120,AT4G01130	AT4G01130
Chr4	17515000	17516000	Chr4	17516000	17517000	2000	3.30103	80	2.82254e-13	5.35528e-09	17515000	17516000	17516000	17517000	80	1	AT4G37190,AT4G37200,AT4G37210,AT4G37220	AT4G37220,AT4G37225,AT4G37230,AT4G37235,AT4G37240
Chr4	14189000	14190000	Chr4	14190000	14191000	2000	3.30103	76	6.85864e-07	0.00134563	14189000	14190000	14190000	14191000	76	1	NA	NA
Chr4	126000	127000	Chr4	127000	128000	2000	3.30103	180	3.31885e-26	7.21285e-21	126000	127000	127000	128000	180	1	AT4G00300	AT4G00300
Chr4	5296000	5297000	Chr4	5297000	5298000	2000	3.30103	85	1.1151e-05	0.0117695	5296000	5297000	5297000	5298000	85	1	AT4G08360	AT4G08370
Chr4	11930000	11931000	Chr4	11931000	11932000	2000	3.30103	39	3.33555e-07	0.000756911	11930000	11931000	11931000	11932000	39	1	AT4G22690	AT4G22690,AT4G22700,AT4G22710,AT4G22720,AT4G22730
Chr4	17174000	17175000	Chr4	17175000	17176000	2000	3.30103	127	1.3118e-07	0.000360877	17174000	17175000	17175000	17176000	127	1	AT4G36350	AT4G36350
Chr4	16564000	16565000	Chr4	16565000	16566000	2000	3.30103	60	1.66976e-08	6.73718e-05	16564000	16565000	16565000	16566000	60	1	AT4G34710	NA
Chr4	1242000	1243000	Chr4	1243000	1244000	2000	3.30103	75	1.25583e-09	7.54327e-06	1242000	1243000	1243000	1244000	75	1	AT4G02780	AT4G02780
Chr4	14738000	14739000	Chr4	14739000	14740000	2000	3.30103	81	9.8092e-07	0.0017799	14738000	14739000	14739000	14740000	81	1	AT4G30130,AT4G30140	AT4G30140,AT4G30150
Chr4	18393000	18394000	Chr4	18394000	18395000	2000	3.30103	132	2.89349e-07	0.000676173	18393000	18394000	18394000	18395000	132	1	AT4G39610	AT4G39610,AT4G39615,AT4G39620
Chr4	7887000	7888000	Chr4	7888000	7889000	2000	3.30103	112	5.84887e-06	0.00711215	7887000	7888000	7888000	7889000	112	1	AT4G13554,AT4G13555,AT4G13560,AT4G13570,AT4G13564,AT4G13572	AT4G13572,AT4G13575
Chr4	18429000	18430000	Chr4	18430000	18431000	2000	3.30103	64	3.11444e-07	0.000717982	18429000	18430000	18430000	18431000	64	1	AT4G39720	AT4G39720,AT4G39730
Chr4	132000	133000	Chr4	133000	134000	2000	3.30103	41	1.21785e-09	7.3614e-06	132000	133000	133000	134000	41	1	AT4G00305	AT4G00310
Chr4	16453000	16454000	Chr4	16454000	16455000	2000	3.30103	47	5.39571e-06	0.00668696	16453000	16454000	16454000	16455000	47	1	AT4G34410,AT4G34412	AT4G34412,AT4G34415
Chr4	15287000	15288000	Chr4	15288000	15289000	2000	3.30103	39	4.01609e-05	0.0304581	15287000	15288000	15288000	15289000	39	1	AT4G31540	AT4G31550
Chr4	16579000	16580000	Chr4	16580000	16581000	2000	3.30103	51	1.18979e-07	0.000333256	16579000	16580000	16580000	16581000	51	1	NA	AT4G34760
Chr4	8216000	8217000	Chr4	8217000	8218000	2000	3.30103	205	1.581e-07	0.000416482	8216000	8217000	8217000	8218000	205	1	AT4G14240,AT4G14250,AT4G14251,AT4G14260	AT4G14260,AT4G14270,AT4G14272,AT4G14276,AT4G14280,AT4G14290
Chr4	8976000	8977000	Chr4	8977000	8978000	2000	3.30103	29	1.87249e-05	0.0174282	8976000	8977000	8977000	8978000	29	1	AT4G15755,AT4G15760,AT4G15765	AT4G15765,AT4G15770,AT4G15775,AT4G15780,AT4G15790,AT4G15800,AT4G15802
Chr4	6350000	6351000	Chr4	6351000	6352000	2000	3.30103	104	1.79556e-05	0.0169064	6350000	6351000	6351000	6352000	104	1	AT4G10190	AT4G10190,AT4G10200
Chr4	14697000	14698000	Chr4	14698000	14699000	2000	3.30103	43	1.86667e-06	0.00295335	14697000	14698000	14698000	14699000	43	1	AT4G30064,AT4G30067,AT4G30070	AT4G30070,AT4G30074,AT4G30080,AT4G30090
Chr4	18525000	18526000	Chr4	18526000	18527000	2000	3.30103	256	1.07078e-28	3.9382e-23	18525000	18526000	18526000	18527000	256	1	AT4G39950	AT4G39950,AT4G39952,AT4G39955,AT4G39960
Chr4	16586000	16587000	Chr4	16587000	16588000	2000	3.30103	34	1.13569e-07	0.000320734	16586000	16587000	16587000	16588000	34	1	NA	NA
Chr4	9032000	9033000	Chr4	9033000	9034000	2000	3.30103	54	1.90764e-20	1.9002e-15	9032000	9033000	9033000	9034000	54	1	AT4G15890,AT4G15900,AT4G15910,AT4G15920	AT4G15920,AT4G15930,AT4G15940
Chr4	12497000	12498000	Chr4	12498000	12499000	2000	3.30103	96	8.06548e-13	1.36266e-08	12497000	12498000	12498000	12499000	96	1	AT4G24050	AT4G24050
Chr4	9200000	9201000	Chr4	9201000	9202000	2000	3.30103	131	3.86775e-11	3.8967e-07	9200000	9201000	9201000	9202000	131	1	AT4G16250,AT4G16260	AT4G16260,AT4G16265
Chr4	11139000	11140000	Chr4	11140000	11141000	2000	3.30103	109	2.05569e-05	0.0186966	11139000	11140000	11140000	11141000	109	1	AT4G20800	AT4G20800
Chr4	7297000	7298000	Chr4	7298000	7299000	2000	3.30103	156	1.01767e-07	0.000292587	7297000	7298000	7298000	7299000	156	1	AT4G12240,AT4G12250,AT4G12270	AT4G12270,AT4G12280,AT4G12290,AT4G12300
Chr4	9839000	9840000	Chr4	9840000	9841000	2000	3.30103	75	2.90688e-07	0.000678971	9839000	9840000	9840000	9841000	75	1	AT4G17670	NA
Chr4	13495000	13496000	Chr4	13496000	13497000	2000	3.30103	30	1.96774e-06	0.00307662	13495000	13496000	13496000	13497000	30	1	AT4G26780,AT4G26795,AT4G26790,AT4G26800,AT4G26810,AT4G26820,AT4G26830	AT4G26830,AT4G26840,AT4G26850,AT4G26860,AT4G26870
Chr4	17288000	17289000	Chr4	17289000	17290000	2000	3.30103	104	7.4405e-22	9.88193e-17	17288000	17289000	17289000	17290000	104	1	AT4G36640,AT4G36648,AT4G36650,AT4G36660,AT4G36670	AT4G36670,AT4G36680
Chr4	10061000	10062000	Chr4	10062000	10063000	2000	3.30103	115	3.28348e-14	7.84958e-10	10061000	10062000	10062000	10063000	115	1	AT4G18150,AT4G18160,AT4G18170	AT4G18170,AT4G18180,AT4G18190,AT4G18195,AT4G18197
Chr4	11591000	11592000	Chr4	11592000	11593000	2000	3.30103	42	6.43234e-06	0.00765804	11591000	11592000	11592000	11593000	42	1	AT4G21850	AT4G21850
Chr4	10569000	10570000	Chr4	10570000	10571000	2000	3.30103	85	1.06292e-07	0.000303227	10569000	10570000	10570000	10571000	85	1	AT4G19340,AT4G19350,AT4G19360,AT4G19370,AT4G19380	AT4G19380
Chr4	10226000	10227000	Chr4	10227000	10228000	2000	3.30103	49	7.88001e-09	3.59507e-05	10226000	10227000	10227000	10228000	49	1	AT4G18520,AT4G18530,AT4G18540,AT4G18550	AT4G18570,AT4G18580,AT4G18590,AT4G18593
Chr4	1570000	1571000	Chr4	1571000	1572000	2000	3.30103	51	4.65295e-05	0.0339747	1570000	1571000	1571000	1572000	51	1	AT4G03540	AT4G03540,AT4G03550
Chr4	18129000	18130000	Chr4	18130000	18131000	2000	3.30103	63	7.64566e-05	0.0488976	18129000	18130000	18130000	18131000	63	1	AT4G38825,AT4G38820,AT4G38830,AT4G38840,AT4G38850	AT4G38860
Chr4	7657000	7658000	Chr4	7658000	7659000	2000	3.30103	80	5.98772e-05	0.04091	7657000	7658000	7658000	7659000	80	1	AT4G13160,AT4G13170,AT4G13180	AT4G13180
Chr4	8320000	8321000	Chr4	8321000	8322000	2000	3.30103	164	6.89528e-05	0.0454733	8320000	8321000	8321000	8322000	164	1	AT4G14465	AT4G14465
Chr4	16478000	16479000	Chr4	16479000	16480000	2000	3.30103	99	3.07189e-07	0.00071018	16478000	16479000	16479000	16480000	99	1	AT4G34450,AT4G34460	AT4G34460,AT4G34470,AT4G34480,AT4G34490
Chr4	17783000	17784000	Chr4	17784000	17785000	2000	3.30103	67	1.17998e-06	0.00206055	17783000	17784000	17784000	17785000	67	1	AT4G37810	AT4G37820
Chr4	14414000	14415000	Chr4	14415000	14416000	2000	3.30103	54	2.35255e-07	0.000574471	14414000	14415000	14415000	14416000	54	1	AT4G29230	AT4G29240
Chr4	17807000	17808000	Chr4	17808000	17809000	2000	3.30103	37	9.21066e-10	5.87964e-06	17807000	17808000	17808000	17809000	37	1	AT4G37870	AT4G37880,AT4G37890,AT4G37895
Chr4	12900000	12901000	Chr4	12901000	12902000	2000	3.30103	214	1.49357e-05	0.0146897	12900000	12901000	12901000	12902000	214	1	AT4G25130,AT4G25140	AT4G25140,AT4G25150
Chr4	14032000	14033000	Chr4	14033000	14034000	2000	3.30103	71	5.73584e-07	0.00116497	14032000	14033000	14033000	14034000	71	1	AT4G28330,AT4G28340,AT4G28350,AT4G28360,AT4G28362,AT4G28365	AT4G28365,AT4G28370
Chr4	18413000	18414000	Chr4	18414000	18415000	2000	3.30103	82	1.9473e-05	0.017949	18413000	18414000	18414000	18415000	82	1	AT4G39675	AT4G39675,AT4G39680
Chr4	16379000	16380000	Chr4	16380000	16381000	2000	3.30103	110	1.66578e-10	1.38755e-06	16379000	16380000	16380000	16381000	110	1	AT4G34200,AT4G34210,AT4G34215	AT4G34215,AT4G34220
Chr4	12145000	12146000	Chr4	12146000	12147000	2000	3.30103	139	1.15562e-05	0.0120958	12145000	12146000	12146000	12147000	139	1	AT4G23170,AT4G23180,AT4G23190,AT4G23205,AT4G23200	AT4G23200,AT4G23210,AT4G23220
Chr4	12868000	12869000	Chr4	12869000	12870000	2000	3.30103	136	3.67447e-10	2.72381e-06	12868000	12869000	12869000	12870000	136	1	AT4G25030,AT4G25040	AT4G25040,AT4G25050
Chr4	1352000	1353000	Chr4	1353000	1354000	2000	3.30103	108	8.23767e-06	0.00932665	1352000	1353000	1353000	1354000	108	1	NA	NA
Chr4	16000000	16001000	Chr4	16001000	16002000	2000	3.30103	50	7.19894e-05	0.0468584	16000000	16001000	16001000	16002000	50	1	AT4G33160,AT4G33170,AT4G33180	AT4G33180,AT4G33200
Chr4	16315000	16316000	Chr4	16316000	16317000	2000	3.30103	67	1.17551e-05	0.0122449	16315000	16316000	16316000	16317000	67	1	AT4G34040,AT4G34050,AT4G34060	AT4G34060
Chr4	86000	87000	Chr4	87000	88000	2000	3.30103	84	1.81585e-12	2.74748e-08	86000	87000	87000	88000	84	1	AT4G00210	NA
Chr4	17592000	17593000	Chr4	17593000	17594000	2000	3.30103	184	3.83324e-08	0.000132713	17592000	17593000	17593000	17594000	184	1	AT4G37409,AT4G37410	AT4G37420
Chr4	10273000	10274000	Chr4	10274000	10275000	2000	3.30103	63	5.29446e-05	0.0374194	10273000	10274000	10274000	10275000	63	1	AT4G18660	AT4G18660,AT4G18670
Chr4	11613000	11614000	Chr4	11614000	11615000	2000	3.30103	111	1.794e-06	0.00286205	11613000	11614000	11614000	11615000	111	1	AT4G21880,AT4G21890,AT4G21895	AT4G21895,AT4G21900
Chr4	14192000	14193000	Chr4	14193000	14194000	2000	3.30103	136	9.20342e-07	0.00168856	14192000	14193000	14193000	14194000	136	1	AT4G28720	AT4G28720
Chr4	9467000	9468000	Chr4	9468000	9469000	2000	3.30103	113	3.18192e-13	5.9428e-09	9467000	9468000	9468000	9469000	113	1	AT4G16820	AT4G16820,AT4G16830,AT4G16835,AT4G16840,AT4G16845
Chr4	10422000	10423000	Chr4	10423000	10424000	2000	3.30103	105	4.64067e-05	0.0339227	10422000	10423000	10423000	10424000	105	1	AT4G19020,AT4G19030	AT4G19030
Chr4	7624000	7625000	Chr4	7625000	7626000	2000	3.30103	34	1.39469e-05	0.0139652	7624000	7625000	7625000	7626000	34	1	AT4G13075	AT4G13075
Chr4	14806000	14807000	Chr4	14807000	14808000	2000	3.30103	51	2.20649e-09	1.21682e-05	14806000	14807000	14807000	14808000	51	1	AT4G30220,AT4G30230	AT4G30230,AT4G30240
Chr4	17369000	17370000	Chr4	17370000	17371000	2000	3.30103	91	1.41412e-15	5.04574e-11	17369000	17370000	17370000	17371000	91	1	AT4G36870	AT4G36870
Chr4	5452000	5453000	Chr4	5453000	5454000	2000	3.30103	42	2.3864e-06	0.00357344	5452000	5453000	5453000	5454000	42	1	AT4G08560	AT4G08560,AT4G08570
Chr4	17112000	17113000	Chr4	17113000	17114000	2000	3.30103	131	9.26478e-06	0.0101786	17112000	17113000	17113000	17114000	131	1	AT4G36160	AT4G36160,AT4G36170,AT4G36180,AT4G36190
Chr4	6154000	6155000	Chr4	6155000	6156000	2000	3.30103	46	3.54002e-05	0.0277207	6154000	6155000	6155000	6156000	46	1	AT4G09740,AT4G09750,AT4G09760,AT4G09770	AT4G09770
Chr4	8445000	8446000	Chr4	8446000	8447000	2000	3.30103	76	3.69871e-05	0.0287086	8445000	8446000	8446000	8447000	76	1	NA	NA
Chr4	11207000	11208000	Chr4	11208000	11209000	2000	3.30103	182	2.87257e-05	0.0237639	11207000	11208000	11208000	11209000	182	1	AT4G20920,AT4G20930,AT4G20940	NA
Chr4	13128000	13129000	Chr4	13129000	13130000	2000	3.30103	104	3.86584e-06	0.00516301	13128000	13129000	13129000	13130000	104	1	AT4G25800,AT4G25810	AT4G25810
Chr4	8438000	8439000	Chr4	8439000	8440000	2000	3.30103	52	8.62024e-07	0.00160195	8438000	8439000	8439000	8440000	52	1	AT4G14713,AT4G14716,AT4G14720	AT4G14723
Chr4	160000	161000	Chr4	161000	162000	2000	3.30103	70	9.43683e-06	0.0103275	160000	161000	161000	162000	70	1	AT4G00360	AT4G00360,AT4G00370
Chr4	17659000	17660000	Chr4	17660000	17661000	2000	3.30103	37	1.07811e-07	0.000306533	17659000	17660000	17660000	17661000	37	1	AT4G37580	AT4G37580
Chr4	2656000	2657000	Chr4	2657000	2658000	2000	3.30103	64	2.05348e-05	0.01868	2656000	2657000	2657000	2658000	64	1	NA	AT4G05150
Chr4	8374000	8375000	Chr4	8375000	8376000	2000	3.30103	73	3.93216e-05	0.0300059	8374000	8375000	8375000	8376000	73	1	AT4G14590	AT4G14590,AT4G14600
Chr4	6883000	6884000	Chr4	6884000	6885000	2000	3.30103	80	4.55422e-05	0.0334895	6883000	6884000	6884000	6885000	80	1	AT4G11310	AT4G11310
Chr4	3356000	3357000	Chr4	3357000	3358000	2000	3.30103	21	6.88837e-05	0.0454443	3356000	3357000	3357000	3358000	21	1	AT4G06534	AT4G06534,AT4G06536
Chr4	14349000	14350000	Chr4	14350000	14351000	2000	3.30103	123	2.58272e-07	0.000619292	14349000	14350000	14350000	14351000	123	1	AT4G29110	AT4G29120,AT4G29130
Chr4	10354000	10355000	Chr4	10355000	10356000	2000	3.30103	80	4.04586e-08	0.000138669	10354000	10355000	10355000	10356000	80	1	AT4G18860,AT4G18870,AT4G18880,AT4G18890	AT4G18890
Chr4	12486000	12487000	Chr4	12487000	12488000	2000	3.30103	46	7.62022e-07	0.0014536	12486000	12487000	12487000	12488000	46	1	AT4G24020,AT4G24025,AT4G24030,AT4G24026	AT4G24040
Chr4	708000	709000	Chr4	709000	710000	2000	3.30103	96	4.71475e-11	4.62884e-07	708000	709000	709000	710000	96	1	AT4G01630,AT4G01640,AT4G01650,AT4G01660	AT4G01660,AT4G01670,AT4G01671
Chr4	6887000	6888000	Chr4	6888000	6889000	2000	3.30103	113	6.95108e-05	0.0456837	6887000	6888000	6888000	6889000	113	1	AT4G11320	AT4G11320
Chr4	18362000	18363000	Chr4	18363000	18364000	2000	3.30103	156	2.55645e-08	9.53434e-05	18362000	18363000	18363000	18364000	156	1	AT4G39460,AT4G39470,AT4G39480	AT4G39480,AT4G39490,AT4G39500
Chr4	609000	610000	Chr4	610000	611000	2000	3.30103	130	2.45521e-10	1.915e-06	609000	610000	610000	611000	130	1	AT4G01450	AT4G01450,AT4G01455
Chr4	15583000	15584000	Chr4	15584000	15585000	2000	3.30103	64	5.12626e-06	0.00641828	15583000	15584000	15584000	15585000	64	1	AT4G32280	AT4G32280,AT4G32285,AT4G32290,AT4G32295
Chr4	2619000	2620000	Chr4	2620000	2621000	2000	3.30103	52	3.5016e-08	0.000122832	2619000	2620000	2620000	2621000	52	1	AT4G05090,AT4G05091,AT4G05095,AT4G05100	NA
Chr4	9046000	9047000	Chr4	9047000	9048000	2000	3.30103	68	3.12812e-07	0.000719748	9046000	9047000	9047000	9048000	68	1	AT4G15950,AT4G15953,AT4G15955,AT4G15960	AT4G15960,AT4G15970
Chr4	16181000	16182000	Chr4	16182000	16183000	2000	3.30103	84	2.26602e-06	0.00343187	16181000	16182000	16182000	16183000	84	1	AT4G33670,AT4G33680,AT4G33690,AT4G33700,AT4G33710	AT4G33720,AT4G33730,AT4G33740
Chr4	16727000	16728000	Chr4	16728000	16729000	2000	3.30103	142	8.00679e-08	0.000240771	16727000	16728000	16728000	16729000	142	1	AT4G35140,AT4G35150	AT4G35150,AT4G35160
Chr5	26972000	26973000	Chr5	26973000	26974000	2000	3.30103	71	2.66129e-25	5.08972e-20	26969000	26974000	26971000	26975000	311	0.45	NA	NA
Chr5	26686000	26687000	Chr5	26687000	26688000	2000	3.30103	44	1.21496e-08	5.15443e-05	26683000	26687000	26684000	26688000	340	0.5	NA	NA
Chr5	18000	19000	Chr5	19000	20000	2000	3.30103	169	2.1118e-26	5.31424e-21	16000	20000	18000	22000	571	0.5	AT5G01050	AT5G01050
Chr5	26323000	26324000	Chr5	26324000	26325000	2000	3.30103	127	3.19693e-16	1.44202e-11	26321000	26325000	26324000	26326000	369	0.75	AT5G65770,AT5G65780,AT5G65790	AT5G65790
Chr5	13000	14000	Chr5	14000	15000	2000	3.30103	82	5.62185e-14	1.27391e-09	11000	14000	13000	16000	431	0.666667	AT5G01010,AT5G01015,AT5G01020,AT5G01030,AT5G01040	AT5G01040
Chr5	26109000	26110000	Chr5	26110000	26111000	2000	3.30103	53	3.15385e-07	0.000723925	26108000	26111000	26109000	26113000	217	0.5	AT5G65310,AT5G65320	AT5G65330
Chr5	10285000	10286000	Chr5	10286000	10287000	2000	3.30103	118	1.42367e-12	2.24651e-08	10283000	10287000	10286000	10288000	419	0.75	AT5G28295	NA
Chr5	18115000	18116000	Chr5	18116000	18117000	2000	3.30103	118	1.57619e-10	1.32446e-06	18114000	18118000	18116000	18119000	549	0.5	AT5G44870	AT5G44870
Chr5	25095000	25096000	Chr5	25096000	25097000	2000	3.30103	128	1.30005e-17	7.96904e-13	25093000	25096000	25095000	25097000	397	0.833333	AT5G62500,AT5G62510	AT5G62510,AT5G62520,AT5G62530,AT5G62540,AT5G62550
Chr5	26706000	26707000	Chr5	26707000	26708000	2000	3.30103	126	2.26027e-12	3.31501e-08	26705000	26708000	26707000	26710000	361	0.555556	AT5G66860,AT5G66870	AT5G66870,AT5G66880,AT5G66890,AT5G66900
Chr5	22000	23000	Chr5	23000	24000	2000	3.30103	66	1.81656e-11	2.02931e-07	21000	23000	22000	26000	224	0.625	AT5G01060	AT5G01060,AT5G01070
Chr5	25993000	25994000	Chr5	25994000	25995000	2000	3.30103	109	1.25276e-14	3.37463e-10	25992000	25994000	25993000	25996000	343	0.833333	AT5G65050,AT5G65060,AT5G65070	AT5G65070
Chr5	26898000	26899000	Chr5	26899000	26900000	2000	3.30103	49	8.84843e-12	1.07377e-07	26895000	26900000	26899000	26901000	187	0.5	AT5G67411	AT5G67411
Chr5	25204000	25205000	Chr5	25205000	25206000	2000	3.30103	129	1.08525e-09	6.68665e-06	25203000	25205000	25205000	25209000	376	0.625	AT5G62750,AT5G62760	AT5G62760
Chr5	23047000	23048000	Chr5	23048000	23049000	2000	3.30103	108	7.00902e-12	8.86559e-08	23045000	23049000	23048000	23050000	315	0.625	AT5G56970	AT5G56970
Chr5	7836000	7837000	Chr5	7837000	7838000	2000	3.30103	196	9.65888e-09	4.27873e-05	7836000	7838000	7837000	7841000	677	0.625	AT5G23250,AT5G23260	AT5G23260
Chr5	26041000	26042000	Chr5	26042000	26043000	2000	3.30103	120	7.71909e-17	3.96849e-12	26039000	26042000	26041000	26045000	306	0.416667	AT5G65170	AT5G65170
Chr5	24689000	24690000	Chr5	24690000	24691000	2000	3.30103	83	4.04346e-10	2.93294e-06	24688000	24691000	24690000	24692000	193	0.666667	AT5G61390,AT5G61400,AT5G61410,AT5G61412,AT5G61420	AT5G61420
Chr5	869000	870000	Chr5	870000	871000	2000	3.30103	109	2.41955e-06	0.00360343	866000	870000	869000	871000	328	0.5	AT5G03470,AT5G03480	AT5G03480
Chr5	23945000	23946000	Chr5	23946000	23947000	2000	3.30103	145	7.63039e-08	0.000231637	23944000	23946000	23945000	23948000	325	0.666667	AT5G59350,AT5G59360	AT5G59360
Chr5	2611000	2612000	Chr5	2612000	2613000	2000	3.30103	34	1.55806e-09	9.0516e-06	2610000	2613000	2612000	2615000	87	0.444444	AT5G08130	NA
Chr5	22770000	22771000	Chr5	22771000	22772000	2000	3.30103	159	9.13376e-19	6.93188e-14	22768000	22771000	22770000	22772000	471	0.666667	AT5G56250	AT5G56250,AT5G56260
Chr5	22118000	22119000	Chr5	22119000	22120000	2000	3.30103	200	4.34228e-27	1.38411e-21	22117000	22119000	22118000	22121000	407	0.666667	AT5G54450,AT5G54460,AT5G54470,AT5G54480	AT5G54480,AT5G54490,AT5G54500
Chr5	6002000	6003000	Chr5	6003000	6004000	2000	3.30103	164	2.35513e-11	2.56503e-07	6001000	6004000	6003000	6005000	414	0.666667	AT5G18120,AT5G18130,AT5G18140,AT5G18150,AT5G18160	AT5G18160,AT5G18170,AT5G18180,AT5G18190
Chr5	26136000	26137000	Chr5	26137000	26138000	2000	3.30103	70	5.18862e-13	9.32636e-09	26136000	26138000	26137000	26140000	189	0.666667	AT5G65410	AT5G65410,AT5G65420
Chr5	6829000	6830000	Chr5	6830000	6831000	2000	3.30103	135	3.20083e-15	1.00026e-10	6828000	6831000	6830000	6832000	337	0.666667	AT5G20200,AT5G20220,AT5G20225,AT5G20230,AT5G20240	AT5G20240
Chr5	3988000	3989000	Chr5	3989000	3990000	2000	3.30103	246	6.13738e-14	1.38417e-09	3986000	3989000	3988000	3990000	548	0.666667	AT5G12330	AT5G12330
Chr5	25364000	25365000	Chr5	25365000	25366000	2000	3.30103	130	6.13061e-17	3.22111e-12	25363000	25366000	25365000	25367000	294	0.666667	AT5G63260	AT5G63270,AT5G63280,AT5G63290,AT5G63300,AT5G63310
Chr5	24535000	24536000	Chr5	24536000	24537000	2000	3.30103	121	1.29595e-11	1.5076e-07	24534000	24536000	24536000	24539000	274	0.666667	AT5G60970	AT5G60970,AT5G60980,AT5G60990
Chr5	26611000	26612000	Chr5	26612000	26613000	2000	3.30103	146	2.71808e-13	5.17764e-09	26609000	26612000	26611000	26613000	411	0.666667	AT5G66658,AT5G66660,AT5G66670	AT5G66670
Chr5	26267000	26268000	Chr5	26268000	26269000	2000	3.30103	204	1.14819e-19	1.03581e-14	26266000	26268000	26267000	26269000	478	0.75	AT5G65690	AT5G65690
Chr5	26741000	26742000	Chr5	26742000	26743000	2000	3.30103	82	4.06107e-06	0.0053579	26739000	26742000	26741000	26743000	247	0.5	AT5G66970,AT5G66980	AT5G66980
Chr5	10293000	10294000	Chr5	10294000	10295000	2000	3.30103	77	1.01044e-09	6.29341e-06	10292000	10295000	10293000	10296000	161	0.333333	AT5G28300	AT5G28300
Chr5	16431000	16432000	Chr5	16432000	16433000	2000	3.30103	129	4.99761e-13	9.05108e-09	16431000	16433000	16432000	16435000	229	0.5	AT5G41000,AT5G41010,AT5G41020,AT5G41030,AT5G41040	AT5G41040,AT5G41050,AT5G41060
Chr5	5353000	5354000	Chr5	5354000	5355000	2000	3.30103	68	5.11255e-09	2.50199e-05	5352000	5354000	5354000	5356000	148	0.75	AT5G16350	AT5G16350
Chr5	22367000	22368000	Chr5	22368000	22369000	2000	3.30103	149	1.44272e-12	2.26908e-08	22365000	22368000	22367000	22369000	296	0.5	AT5G55100,AT5G55110	AT5G55110,AT5G55120,AT5G55125,AT5G55130,AT5G55131,AT5G55132
Chr5	10430000	10431000	Chr5	10431000	10432000	2000	3.30103	94	2.93347e-08	0.000106497	10430000	10431000	10431000	10434000	172	1	AT5G28470	AT5G28470
Chr5	23931000	23932000	Chr5	23932000	23933000	2000	3.30103	86	1.21253e-05	0.012549	23930000	23932000	23932000	23934000	167	0.75	AT5G59330	AT5G59340
Chr5	25380000	25381000	Chr5	25381000	25382000	2000	3.30103	187	6.59124e-22	9.00412e-17	25380000	25382000	25381000	25383000	370	0.75	AT5G63320,AT5G63340,AT5G63350	AT5G63350,AT5G63370,AT5G63380,AT5G63390
Chr5	25898000	25899000	Chr5	25899000	25900000	2000	3.30103	45	1.20151e-07	0.000336146	25898000	25899000	25899000	25902000	150	1	AT5G64770	NA
Chr5	26919000	26920000	Chr5	26920000	26921000	2000	3.30103	51	4.77463e-19	3.80479e-14	26918000	26920000	26919000	26922000	135	0.5	AT5G67450	AT5G67460,AT5G67455,AT5G67470,AT5G67480
Chr5	23334000	23335000	Chr5	23335000	23336000	2000	3.30103	65	2.00315e-09	1.12522e-05	23334000	23336000	23335000	23337000	206	0.75	AT5G57620	AT5G57620
Chr5	26964000	26965000	Chr5	26965000	26966000	2000	3.30103	63	3.91615e-23	6.4566e-18	26964000	26966000	26965000	26967000	109	0.75	AT5G67620	AT5G67620
Chr5	3193000	3194000	Chr5	3194000	3195000	2000	3.30103	200	1.15479e-15	4.34753e-11	3193000	3194000	3194000	3197000	357	1	AT5G10170,AT5G10180	AT5G10180,AT5G10190,AT5G10200
Chr5	26462000	26463000	Chr5	26463000	26464000	2000	3.30103	122	1.00959e-09	6.29341e-06	26462000	26463000	26463000	26466000	218	1	AT5G66190,AT5G66200,AT5G66210,AT5G66211,AT5G66230,AT5G66220	AT5G66230,AT5G66240
Chr5	22761000	22762000	Chr5	22762000	22763000	2000	3.30103	85	4.15292e-07	0.000902554	22760000	22762000	22762000	22764000	239	0.75	AT5G56220,AT5G56230,AT5G56240	AT5G56240
Chr5	3751000	3752000	Chr5	3752000	3753000	2000	3.30103	96	6.8395e-14	1.50698e-09	3749000	3752000	3751000	3753000	181	0.5	AT5G11650,AT5G11660	AT5G11670,AT5G11680,AT5G11690,AT5G11700
Chr5	152000	153000	Chr5	153000	154000	2000	3.30103	62	1.2118e-11	1.41315e-07	151000	154000	153000	155000	129	0.5	AT5G01365,AT5G01370	AT5G01370
Chr5	24779000	24780000	Chr5	24780000	24781000	2000	3.30103	58	1.74491e-05	0.0165674	24778000	24780000	24779000	24782000	202	0.5	AT5G61650,AT5G61660	NA
Chr5	25260000	25261000	Chr5	25261000	25262000	2000	3.30103	38	2.52043e-06	0.00372514	25259000	25261000	25260000	25263000	121	0.5	NA	AT5G62950,AT5G62960
Chr5	73000	74000	Chr5	74000	75000	2000	3.30103	69	2.59217e-13	4.97744e-09	72000	74000	73000	75000	157	0.75	AT5G01190	AT5G01190
Chr5	25929000	25930000	Chr5	25930000	25931000	2000	3.30103	153	1.90586e-28	6.50888e-23	25929000	25931000	25930000	25932000	341	0.75	AT5G64850,AT5G64855,AT5G64860,AT5G64870	AT5G64870
Chr5	26234000	26235000	Chr5	26235000	26236000	2000	3.30103	36	6.11888e-08	0.000193877	26234000	26235000	26235000	26238000	113	1	NA	NA
Chr5	396000	397000	Chr5	397000	398000	2000	3.30103	209	2.12746e-13	4.15181e-09	395000	397000	396000	398000	401	0.75	AT5G02030	AT5G02030,AT5G02035,AT5G02040,AT5G02050,AT5G02060
Chr5	211000	212000	Chr5	212000	213000	2000	3.30103	208	9.92268e-19	7.41295e-14	211000	213000	212000	214000	355	0.75	AT5G01520,AT5G01530,AT5G01540,AT5G01542	AT5G01540,AT5G01542,AT5G01550,AT5G01560,AT5G01570,AT5G01580
Chr5	15613000	15614000	Chr5	15614000	15615000	2000	3.30103	166	2.32437e-05	0.0204568	15612000	15614000	15613000	15615000	408	0.75	AT5G39000	AT5G39000,AT5G39010,AT5G39020,AT5G39024,AT5G39030
Chr5	25198000	25199000	Chr5	25199000	25200000	2000	3.30103	132	3.76452e-15	1.14644e-10	25197000	25199000	25199000	25201000	225	0.75	AT5G62710,AT5G62720,AT5G62730	AT5G62730,AT5G62740
Chr5	26480000	26481000	Chr5	26481000	26482000	2000	3.30103	247	2.7502e-17	1.58427e-12	26480000	26482000	26481000	26483000	418	0.75	AT5G66300	AT5G66300
Chr5	23360000	23361000	Chr5	23361000	23362000	2000	3.30103	67	4.94761e-13	9.02894e-09	23360000	23361000	23361000	23363000	91	1	AT5G57670	AT5G57670
Chr5	21410000	21411000	Chr5	21411000	21412000	2000	3.30103	83	2.32998e-17	1.35857e-12	21409000	21411000	21411000	21412000	123	1	AT5G52830	AT5G52830
Chr5	880000	881000	Chr5	881000	882000	2000	3.30103	128	2.14834e-16	9.94755e-12	880000	882000	881000	883000	193	0.5	AT5G03510	AT5G03510
Chr5	25232000	25233000	Chr5	25233000	25234000	2000	3.30103	184	2.90588e-26	6.8439e-21	25231000	25233000	25233000	25234000	259	1	AT5G62860	AT5G62860,AT5G62865,AT5G62880,AT5G62890
Chr5	19028000	19029000	Chr5	19029000	19030000	2000	3.30103	155	3.54595e-07	0.00079634	19027000	19029000	19028000	19030000	194	0.5	NA	NA
Chr5	23352000	23353000	Chr5	23353000	23354000	2000	3.30103	60	2.90217e-19	2.39242e-14	23351000	23353000	23353000	23354000	90	1	NA	AT5G57660
Chr5	9517000	9518000	Chr5	9518000	9519000	2000	3.30103	114	1.19652e-16	5.95924e-12	9516000	9518000	9518000	9519000	152	1	AT5G27010,AT5G27020,AT5G27030	AT5G27050,AT5G27060,AT5G27070
Chr5	25328000	25329000	Chr5	25329000	25330000	2000	3.30103	87	4.12756e-25	7.30923e-20	25327000	25329000	25329000	25330000	121	1	AT5G63140	AT5G63140,AT5G63145,AT5G63150
Chr5	22634000	22635000	Chr5	22635000	22636000	2000	3.30103	137	6.36116e-11	5.95193e-07	22634000	22636000	22635000	22637000	220	0.5	NA	AT5G55900,AT5G55910
Chr5	971000	972000	Chr5	972000	973000	2000	3.30103	36	8.13191e-11	7.47707e-07	971000	972000	972000	974000	58	1	AT5G03705,AT5G03710,AT5G03720	AT5G03720,AT5G03730
Chr5	25659000	25660000	Chr5	25660000	25661000	2000	3.30103	160	2.3385e-19	1.9966e-14	25658000	25660000	25660000	25661000	211	1	AT5G64120	AT5G64120
Chr5	22747000	22748000	Chr5	22748000	22749000	2000	3.30103	126	3.51168e-09	1.82107e-05	22747000	22748000	22748000	22750000	167	1	AT5G56200	AT5G56200,AT5G56210
Chr5	2530000	2531000	Chr5	2531000	2532000	2000	3.30103	134	7.23963e-09	3.3444e-05	2530000	2531000	2531000	2533000	227	1	AT5G07890,AT5G07900,AT5G07910,AT5G07920,AT5G07930	AT5G07930,AT5G07940,AT5G07950
Chr5	21039000	21040000	Chr5	21040000	21041000	2000	3.30103	87	9.52959e-10	6.01895e-06	21039000	21040000	21040000	21042000	130	1	AT5G51790	AT5G51790
Chr5	2659000	2660000	Chr5	2660000	2661000	2000	3.30103	80	1.55894e-08	6.38553e-05	2658000	2660000	2660000	2661000	137	1	AT5G08260	AT5G08260,AT5G08270,AT5G08280,AT5G08290,AT5G08300,AT5G08305
Chr5	4214000	4215000	Chr5	4215000	4216000	2000	3.30103	104	1.24409e-14	3.37463e-10	4214000	4215000	4215000	4217000	166	1	AT5G13190,AT5G13200,AT5G13210	AT5G13210
Chr5	6412000	6413000	Chr5	6413000	6414000	2000	3.30103	78	1.59847e-06	0.0026111	6411000	6413000	6413000	6414000	126	1	AT5G19110	AT5G19110,AT5G19120,AT5G19130
Chr5	20085000	20086000	Chr5	20086000	20087000	2000	3.30103	39	1.70787e-07	0.000443201	20085000	20087000	20086000	20088000	90	0.5	NA	NA
Chr5	24986000	24987000	Chr5	24987000	24988000	2000	3.30103	73	4.82741e-11	4.70084e-07	24986000	24988000	24987000	24989000	121	0.5	AT5G62200,AT5G62210	AT5G62210,AT5G62220
Chr5	9667000	9668000	Chr5	9668000	9669000	2000	3.30103	124	3.08655e-14	7.49118e-10	9667000	9668000	9668000	9670000	243	1	AT5G27360,AT5G27370,AT5G27380	AT5G27380,AT5G27395,AT5G27390,AT5G27400,AT5G27410
Chr5	5386000	5387000	Chr5	5387000	5388000	2000	3.30103	105	2.69814e-12	3.87402e-08	5386000	5388000	5387000	5389000	221	0.5	AT5G16500	AT5G16500
Chr5	26191000	26192000	Chr5	26192000	26193000	2000	3.30103	175	2.94829e-16	1.34253e-11	26190000	26192000	26192000	26193000	274	1	AT5G65530	AT5G65530,AT5G65533,AT5G65535,AT5G65540,AT5G65550
Chr5	23389000	23390000	Chr5	23390000	23391000	2000	3.30103	83	2.02951e-07	0.000509644	23389000	23390000	23390000	23392000	122	1	AT5G57710,AT5G57720	AT5G57720,AT5G57730,AT5G57735,AT5G57740,AT5G57747,AT5G57750
Chr5	25887000	25888000	Chr5	25888000	25889000	2000	3.30103	34	4.16673e-10	3.00306e-06	25887000	25889000	25888000	25890000	55	0.5	AT5G64740	NA
Chr5	23039000	23040000	Chr5	23040000	23041000	2000	3.30103	115	2.15611e-15	7.01288e-11	23039000	23040000	23040000	23042000	176	1	AT5G56950,AT5G56960	AT5G56960
Chr5	16392000	16393000	Chr5	16393000	16394000	2000	3.30103	114	3.76747e-18	2.50184e-13	16391000	16393000	16392000	16394000	165	0.5	AT5G40900	AT5G40900
Chr5	26895000	26896000	Chr5	26896000	26897000	2000	3.30103	69	4.46452e-13	8.17855e-09	26895000	26896000	26896000	26898000	110	1	AT5G67400	AT5G67400,AT5G67410
Chr5	23790000	23791000	Chr5	23791000	23792000	2000	3.30103	182	7.66216e-11	7.08603e-07	23790000	23791000	23791000	23793000	280	1	AT5G58910	AT5G58910
Chr5	26855000	26856000	Chr5	26856000	26857000	2000	3.30103	126	6.79951e-35	4.06378e-29	26855000	26857000	26856000	26858000	176	0.5	AT5G67300,AT5G67310	AT5G67300,AT5G67310,AT5G67320,AT5G67330,AT5G67340
Chr5	24240000	24241000	Chr5	24241000	24242000	2000	3.30103	121	5.34986e-10	3.66462e-06	24240000	24242000	24241000	24243000	199	0.5	AT5G60200	AT5G60200,AT5G60210
Chr5	16308000	16309000	Chr5	16309000	16310000	2000	3.30103	83	1.32552e-06	0.00226264	16308000	16309000	16309000	16311000	147	1	AT5G40740,AT5G40750	AT5G40750,AT5G40760,AT5G40770
Chr5	20505000	20506000	Chr5	20506000	20507000	2000	3.30103	180	5.53873e-16	2.30279e-11	20504000	20506000	20506000	20507000	259	1	AT5G50350,AT5G50360	AT5G50360,AT5G50361,AT5G50370,AT5G50375,AT5G50380
Chr5	4558000	4559000	Chr5	4559000	4560000	2000	3.30103	150	3.56625e-09	1.84337e-05	4557000	4559000	4559000	4560000	283	1	AT5G14105,AT5G14110,AT5G14120,AT5G14130	AT5G14130,AT5G14140
Chr5	4218000	4219000	Chr5	4219000	4220000	2000	3.30103	51	1.89341e-12	2.83857e-08	4218000	4220000	4219000	4221000	107	0.5	AT5G13220	AT5G13220,AT5G13225,AT5G13230
Chr5	20091000	20092000	Chr5	20092000	20093000	2000	3.30103	172	9.46975e-10	5.99742e-06	20091000	20093000	20092000	20094000	242	0.5	AT5G49520	AT5G49520,AT5G49525,AT5G49530
Chr5	3125000	3126000	Chr5	3126000	3127000	2000	3.30103	88	7.90345e-09	3.60233e-05	3124000	3126000	3126000	3127000	141	1	AT5G09990,AT5G09995	AT5G09995,AT5G10000,AT5G10010,AT5G10020
Chr5	7522000	7523000	Chr5	7523000	7524000	2000	3.30103	41	1.11291e-06	0.00196641	7521000	7523000	7522000	7524000	65	0.5	NA	AT5G22630
Chr5	3725000	3726000	Chr5	3726000	3727000	2000	3.30103	37	1.1524e-05	0.0120752	3725000	3727000	3726000	3728000	61	0.5	NA	AT5G11590
Chr5	8857000	8858000	Chr5	8858000	8859000	2000	3.30103	135	3.38062e-06	0.00463539	8857000	8859000	8858000	8860000	248	0.5	AT5G25450	AT5G25450,AT5G25460
Chr5	7402000	7403000	Chr5	7403000	7404000	2000	3.30103	414	6.7038e-12	8.50201e-08	7401000	7403000	7403000	7404000	535	1	AT5G22330,AT5G22340,AT5G22350,AT5G22355	AT5G22355,AT5G22360
Chr5	26525000	26526000	Chr5	26526000	26527000	2000	3.30103	93	2.11073e-08	8.22202e-05	26525000	26526000	26526000	26528000	154	1	AT5G66420,AT5G66430	AT5G66430,AT5G66440,AT5G66450
Chr5	23023000	23024000	Chr5	23024000	23025000	2000	3.30103	66	4.67814e-06	0.00597739	23023000	23024000	23024000	23026000	146	1	AT5G56890,AT5G56900,AT5G56910	AT5G56910,AT5G56920,AT5G56930,AT5G56940
Chr5	3849000	3850000	Chr5	3850000	3851000	2000	3.30103	277	2.17647e-07	0.000541147	3848000	3850000	3850000	3851000	461	1	AT5G11940	AT5G11940
Chr5	4974000	4975000	Chr5	4975000	4976000	2000	3.30103	127	9.99417e-10	6.26274e-06	4974000	4976000	4975000	4977000	194	0.5	AT5G15310	AT5G15310,AT5G15320,AT5G15330,AT5G15340
Chr5	24103000	24104000	Chr5	24104000	24105000	2000	3.30103	60	1.7007e-07	0.000441878	24102000	24104000	24103000	24105000	92	0.5	AT5G59820	AT5G59830,AT5G59840,AT5G59845,AT5G59850,AT5G59860
Chr5	8657000	8658000	Chr5	8658000	8659000	2000	3.30103	133	7.01331e-09	3.27465e-05	8657000	8659000	8658000	8660000	201	0.5	AT5G25110	AT5G25110
Chr5	351000	352000	Chr5	352000	353000	2000	3.30103	164	6.23477e-12	8.01346e-08	351000	352000	352000	354000	276	1	AT5G01900	AT5G01900,AT5G01910,AT5G01920,AT5G01930
Chr5	18394000	18395000	Chr5	18395000	18396000	2000	3.30103	103	1.23954e-07	0.00034517	18393000	18395000	18394000	18396000	171	0.5	AT5G45380	AT5G45380,AT5G45390,AT5G45400,AT5G45410,AT5G45420
Chr5	576000	577000	Chr5	577000	578000	2000	3.30103	80	3.35649e-11	3.49635e-07	575000	577000	577000	578000	128	1	AT5G02560,AT5G02570	AT5G02570
Chr5	7003000	7004000	Chr5	7004000	7005000	2000	3.30103	143	2.57701e-08	9.58859e-05	7002000	7004000	7004000	7005000	265	1	AT5G20690	AT5G20690,AT5G20700
Chr5	3735000	3736000	Chr5	3736000	3737000	2000	3.30103	70	7.27076e-08	0.000223703	3735000	3737000	3736000	3738000	142	0.5	AT5G11600,AT5G11610	AT5G11610
Chr5	6362000	6363000	Chr5	6363000	6364000	2000	3.30103	152	7.61285e-17	3.95641e-12	6362000	6363000	6363000	6365000	195	1	AT5G19020,AT5G19025,AT5G19030,AT5G19040	AT5G19040
Chr5	715000	716000	Chr5	716000	717000	2000	3.30103	136	9.69358e-12	1.15292e-07	715000	716000	716000	718000	222	1	AT5G03040,AT5G03050	AT5G03050,AT5G03060
Chr5	22224000	22225000	Chr5	22225000	22226000	2000	3.30103	227	5.47485e-09	2.64946e-05	22223000	22225000	22225000	22226000	364	1	AT5G54680,AT5G54690,AT5G54700	AT5G54700
Chr5	2235000	2236000	Chr5	2236000	2237000	2000	3.30103	68	3.60074e-10	2.6733e-06	2234000	2236000	2235000	2237000	145	0.5	NA	AT5G07190
Chr5	20702000	20703000	Chr5	20703000	20704000	2000	3.30103	78	1.39248e-10	1.18889e-06	20702000	20703000	20703000	20705000	126	1	AT5G50860,AT5G50870,AT5G50880,AT5G50890	AT5G50890,AT5G50900,AT5G50910,AT5G50915
Chr5	12681000	12682000	Chr5	12682000	12683000	2000	3.30103	52	2.41661e-06	0.00360064	12681000	12682000	12682000	12684000	86	1	AT5G33406,AT5G33399	AT5G33399
Chr5	17847000	17848000	Chr5	17848000	17849000	2000	3.30103	80	1.95968e-05	0.018036	17847000	17848000	17848000	17850000	167	1	AT5G44300,AT5G44306,AT5G44310	AT5G44310
Chr5	21265000	21266000	Chr5	21266000	21267000	2000	3.30103	33	7.87235e-06	0.00899182	21264000	21266000	21266000	21267000	101	1	AT5G52390	NA
Chr5	2254000	2255000	Chr5	2255000	2256000	2000	3.30103	92	9.02876e-07	0.00166354	2254000	2255000	2255000	2257000	147	1	AT5G07210	AT5G07210
Chr5	23101000	23102000	Chr5	23102000	23103000	2000	3.30103	56	2.73212e-10	2.09678e-06	23101000	23102000	23102000	23104000	107	1	AT5G57090	AT5G57090
Chr5	25090000	25091000	Chr5	25091000	25092000	2000	3.30103	120	1.29357e-16	6.3762e-12	25089000	25091000	25091000	25092000	208	1	AT5G62480,AT5G62490	AT5G62490
Chr5	17164000	17165000	Chr5	17165000	17166000	2000	3.30103	98	4.08138e-07	0.000891463	17163000	17165000	17165000	17166000	139	1	AT5G42785,AT5G42790,AT5G42797,AT5G42800	AT5G42800,AT5G42810,AT5G42820,AT5G42825
Chr5	25079000	25080000	Chr5	25080000	25081000	2000	3.30103	94	2.24783e-09	1.23676e-05	25078000	25080000	25079000	25081000	139	0.5	AT5G62440,AT5G62460,AT5G62470	AT5G62470
Chr5	25654000	25655000	Chr5	25655000	25656000	2000	3.30103	159	2.23426e-15	7.16952e-11	25654000	25655000	25655000	25657000	228	1	AT5G64110	AT5G64110
Chr5	8079000	8080000	Chr5	8080000	8081000	2000	3.30103	82	2.49519e-07	0.000601925	8078000	8080000	8080000	8082000	114	0.5	AT5G23920,AT5G23930,AT5G23940	AT5G23950
Chr5	1835000	1836000	Chr5	1836000	1837000	2000	3.30103	465	3.53718e-24	6.04006e-19	1834000	1836000	1836000	1837000	585	1	AT5G06090	AT5G06090,AT5G06100,AT5G06110,AT5G06120
Chr5	6474000	6475000	Chr5	6475000	6476000	2000	3.30103	77	2.42576e-09	1.31648e-05	6474000	6475000	6475000	6477000	119	1	AT5G19250	AT5G19257
Chr5	415000	416000	Chr5	416000	417000	2000	3.30103	80	6.92324e-06	0.00810723	415000	416000	416000	418000	217	1	AT5G02070,AT5G02080,AT5G02090,AT5G02100	AT5G02100,AT5G02110,AT5G02120
Chr5	10454000	10455000	Chr5	10455000	10456000	2000	3.30103	67	1.37864e-05	0.0138596	10453000	10455000	10455000	10456000	98	1	AT5G28490	AT5G28490,AT5G28491
Chr5	26909000	26910000	Chr5	26910000	26911000	2000	3.30103	37	8.51163e-12	1.0435e-07	26908000	26910000	26910000	26911000	54	1	NA	AT5G67430,AT5G67440
Chr5	23295000	23296000	Chr5	23296000	23297000	2000	3.30103	44	4.03836e-06	0.00533825	23294000	23296000	23296000	23297000	93	1	AT5G57520	AT5G57520
Chr5	4951000	4952000	Chr5	4952000	4953000	2000	3.30103	92	1.32192e-06	0.00225889	4951000	4952000	4952000	4954000	161	1	AT5G15250	AT5G15250,AT5G15254,AT5G15260,AT5G15265,AT5G15270
Chr5	3285000	3286000	Chr5	3286000	3287000	2000	3.30103	38	2.73515e-09	1.45954e-05	3284000	3286000	3286000	3287000	75	1	AT5G10450	AT5G10450,AT5G10455,AT5G10460,AT5G10470
Chr5	21975000	21976000	Chr5	21976000	21977000	2000	3.30103	67	1.16321e-06	0.00204246	21975000	21977000	21976000	21978000	168	0.5	AT5G54148	AT5G54148
Chr5	114000	115000	Chr5	115000	116000	2000	3.30103	264	1.11978e-26	3.14939e-21	114000	115000	115000	117000	303	1	AT5G01270,AT5G01280	AT5G01280,AT5G01290
Chr5	17756000	17757000	Chr5	17757000	17758000	2000	3.30103	303	5.95617e-15	1.73646e-10	17756000	17757000	17757000	17759000	406	1	AT5G44090,AT5G44100,AT5G44110,AT5G44120	AT5G44120,AT5G44130
Chr5	23345000	23346000	Chr5	23346000	23347000	2000	3.30103	65	3.23069e-10	2.43256e-06	23344000	23346000	23345000	23347000	128	0.5	AT5G57630,AT5G57640,AT5G57650	AT5G57650,AT5G57655
Chr5	967000	968000	Chr5	968000	969000	2000	3.30103	39	1.67695e-10	1.39442e-06	966000	968000	967000	969000	78	0.5	AT5G03690,AT5G03700	NA
Chr5	24009000	24010000	Chr5	24010000	24011000	2000	3.30103	99	2.29607e-08	8.8036e-05	24009000	24010000	24010000	24011000	99	1	AT5G59570,AT5G59580,AT5G59590	AT5G59590,AT5G59600,AT5G59610,AT5G59613,AT5G59616
Chr5	17959000	17960000	Chr5	17960000	17961000	2000	3.30103	60	8.75148e-10	5.62407e-06	17959000	17960000	17960000	17961000	60	1	NA	AT5G44568
Chr5	3565000	3566000	Chr5	3566000	3567000	2000	3.30103	43	4.43739e-05	0.0328223	3565000	3566000	3566000	3567000	43	1	AT5G11190	AT5G11190
Chr5	5675000	5676000	Chr5	5676000	5677000	2000	3.30103	142	1.49651e-05	0.0147136	5675000	5676000	5676000	5677000	142	1	AT5G17240,AT5G17250,AT5G17260	AT5G17260,AT5G17262,AT5G17270,AT5G17280,AT5G17290
Chr5	17729000	17730000	Chr5	17730000	17731000	2000	3.30103	32	7.01829e-05	0.0460495	17729000	17730000	17730000	17731000	32	1	NA	AT5G44060,AT5G44065,AT5G44070,AT5G44080
Chr5	24608000	24609000	Chr5	24609000	24610000	2000	3.30103	108	1.83727e-15	6.17316e-11	24608000	24609000	24609000	24610000	108	1	AT5G61150,AT5G61160	AT5G61160,AT5G61170,AT5G61180,AT5G61190
Chr5	26744000	26745000	Chr5	26745000	26746000	2000	3.30103	110	5.19215e-09	2.53575e-05	26744000	26745000	26745000	26746000	110	1	AT5G66985,AT5G66990	AT5G66990
Chr5	1524000	1525000	Chr5	1525000	1526000	2000	3.30103	75	2.94336e-05	0.0241721	1524000	1525000	1525000	1526000	75	1	AT5G05140,AT5G05150	AT5G05150
Chr5	5646000	5647000	Chr5	5647000	5648000	2000	3.30103	22	6.34461e-09	3.01843e-05	5646000	5647000	5647000	5648000	22	1	AT5G17165	AT5G17165
Chr5	324000	325000	Chr5	325000	326000	2000	3.30103	46	3.31147e-08	0.000117805	324000	325000	325000	326000	46	1	AT5G01840	AT5G01840
Chr5	21870000	21871000	Chr5	21871000	21872000	2000	3.30103	69	4.63356e-07	0.000976388	21870000	21871000	21871000	21872000	69	1	AT5G53870	AT5G53870,AT5G53880,AT5G53890
Chr5	17394000	17395000	Chr5	17395000	17396000	2000	3.30103	211	3.57378e-06	0.00484605	17394000	17395000	17395000	17396000	211	1	AT5G43310,AT5G43320,AT5G43330,AT5G43340	AT5G43340
Chr5	1213000	1214000	Chr5	1214000	1215000	2000	3.30103	82	9.40419e-12	1.1241e-07	1213000	1214000	1214000	1215000	82	1	AT5G04310,AT5G04320,AT5G04330	AT5G04330
Chr5	15698000	15699000	Chr5	15699000	15700000	2000	3.30103	23	1.39227e-05	0.0139468	15698000	15699000	15699000	15700000	23	1	AT5G39190,AT5G39200	NA
Chr5	4733000	4734000	Chr5	4734000	4735000	2000	3.30103	120	9.44372e-11	8.50284e-07	4733000	4734000	4734000	4735000	120	1	AT5G14680,AT5G14690	AT5G14690
Chr5	26613000	26614000	Chr5	26614000	26615000	2000	3.30103	35	6.14048e-06	0.00737651	26613000	26614000	26614000	26615000	35	1	NA	AT5G66675
Chr5	7172000	7173000	Chr5	7173000	7174000	2000	3.30103	67	4.34911e-17	2.36298e-12	7172000	7173000	7173000	7174000	67	1	AT5G21100,AT5G21105	AT5G21105
Chr5	4542000	4543000	Chr5	4543000	4544000	2000	3.30103	68	2.25582e-05	0.0200068	4542000	4543000	4543000	4544000	68	1	AT5G14040,AT5G14050,AT5G14060,AT5G14070	AT5G14080,AT5G14090,AT5G14100
Chr5	7622000	7623000	Chr5	7623000	7624000	2000	3.30103	145	1.29684e-07	0.000357997	7622000	7623000	7623000	7624000	145	1	AT5G22810	AT5G22810,AT5G22820
Chr5	378000	379000	Chr5	379000	380000	2000	3.30103	96	3.95537e-05	0.0301158	378000	379000	379000	380000	96	1	AT5G01990	AT5G01990,AT5G02000,AT5G02010
Chr5	15602000	15603000	Chr5	15603000	15604000	2000	3.30103	72	2.45147e-06	0.0036401	15602000	15603000	15603000	15604000	72	1	NA	NA
Chr5	19546000	19547000	Chr5	19547000	19548000	2000	3.30103	161	7.62757e-08	0.000231637	19546000	19547000	19547000	19548000	161	1	AT5G48175,AT5G48180,AT5G48190,AT5G48200,AT5G48205	AT5G48200,AT5G48205,AT5G48210,AT5G48220,AT5G48230
Chr5	18372000	18373000	Chr5	18373000	18374000	2000	3.30103	28	1.60284e-06	0.00261555	18372000	18373000	18373000	18374000	28	1	NA	NA
Chr5	15375000	15376000	Chr5	15376000	15377000	2000	3.30103	52	5.66598e-05	0.0392616	15375000	15376000	15376000	15377000	52	1	AT5G38400	AT5G38400,AT5G38410
Chr5	20436000	20437000	Chr5	20437000	20438000	2000	3.30103	90	1.84744e-05	0.0172529	20436000	20437000	20437000	20438000	90	1	AT5G50175,AT5G50180,AT5G50190,AT5G50200	AT5G50200
Chr5	24729000	24730000	Chr5	24730000	24731000	2000	3.30103	28	4.76717e-06	0.00607168	24729000	24730000	24730000	24731000	28	1	AT5G61460,AT5G61470,AT5G61480	AT5G61490,AT5G61495,AT5G61500,AT5G61510,AT5G61520
Chr5	25325000	25326000	Chr5	25326000	25327000	2000	3.30103	42	2.3928e-08	9.0646e-05	25325000	25326000	25326000	25327000	42	1	AT5G63120,AT5G63130,AT5G63135	AT5G63135
Chr5	16163000	16164000	Chr5	16164000	16165000	2000	3.30103	124	1.52179e-10	1.28552e-06	16163000	16164000	16164000	16165000	124	1	AT5G40390	AT5G40390,AT5G40395,AT5G40400,AT5G40405
Chr5	2077000	2078000	Chr5	2078000	2079000	2000	3.30103	141	2.26189e-07	0.00055717	2077000	2078000	2078000	2079000	141	1	AT5G06720	AT5G06720
Chr5	15256000	15257000	Chr5	15257000	15258000	2000	3.30103	73	8.0629e-09	3.66453e-05	15256000	15257000	15257000	15258000	73	1	AT5G38197,AT5G38200	AT5G38200,AT5G38210,AT5G38212
Chr5	13762000	13763000	Chr5	13763000	13764000	2000	3.30103	104	4.79268e-06	0.00609442	13762000	13763000	13763000	13764000	104	1	AT5G35570,AT5G35580	AT5G35580
Chr5	4151000	4152000	Chr5	4152000	4153000	2000	3.30103	42	5.19616e-05	0.0368827	4151000	4152000	4152000	4153000	42	1	AT5G13080	AT5G13090,AT5G13100
Chr5	1219000	1220000	Chr5	1220000	1221000	2000	3.30103	52	1.99512e-07	0.000503652	1219000	1220000	1220000	1221000	52	1	AT5G04347	AT5G04347,AT5G04350
Chr5	5031000	5032000	Chr5	5032000	5033000	2000	3.30103	99	8.9415e-06	0.0098985	5031000	5032000	5032000	5033000	99	1	AT5G15470,AT5G15480,AT5G15490,AT5G15500	AT5G15500,AT5G15510,AT5G15520,AT5G15530
Chr5	18909000	18910000	Chr5	18910000	18911000	2000	3.30103	72	2.00445e-05	0.0183633	18909000	18910000	18910000	18911000	72	1	AT5G46600	AT5G46600
Chr5	6955000	6956000	Chr5	6956000	6957000	2000	3.30103	133	8.04361e-06	0.00915027	6955000	6956000	6956000	6957000	133	1	AT5G20560	AT5G20560,AT5G20570,AT5G20580,AT5G20590,AT5G20600
Chr5	26378000	26379000	Chr5	26379000	26380000	2000	3.30103	54	4.54404e-06	0.00584038	26378000	26379000	26379000	26380000	54	1	AT5G65925,AT5G65930,AT5G65940	AT5G65940,AT5G65950,AT5G65960,AT5G65970
Chr5	22506000	22507000	Chr5	22507000	22508000	2000	3.30103	175	7.0041e-16	2.80649e-11	22506000	22507000	22507000	22508000	175	1	AT5G55540,AT5G55550,AT5G55560	AT5G55560,AT5G55565,AT5G55570,AT5G55580
Chr5	7495000	7496000	Chr5	7496000	7497000	2000	3.30103	96	1.45328e-05	0.0143891	7495000	7496000	7496000	7497000	96	1	AT5G22570	AT5G22570
Chr5	17625000	17626000	Chr5	17626000	17627000	2000	3.30103	62	6.71973e-07	0.00132326	17625000	17626000	17626000	17627000	62	1	AT5G43830,AT5G43840	AT5G43840
Chr5	9044000	9045000	Chr5	9045000	9046000	2000	3.30103	155	3.27035e-06	0.00453228	9044000	9045000	9045000	9046000	155	1	AT5G25920	AT5G25920
Chr5	20683000	20684000	Chr5	20684000	20685000	2000	3.30103	97	1.21932e-05	0.0126079	20683000	20684000	20684000	20685000	97	1	AT5G50830	AT5G50830,AT5G50840,AT5G50850
Chr5	18241000	18242000	Chr5	18242000	18243000	2000	3.30103	139	7.87115e-08	0.000237588	18241000	18242000	18242000	18243000	139	1	AT5G45120	AT5G45120,AT5G45130,AT5G45140
Chr5	7861000	7862000	Chr5	7862000	7863000	2000	3.30103	111	2.31542e-07	0.000567724	7861000	7862000	7862000	7863000	111	1	AT5G23310,AT5G23320,AT5G23330,AT5G23340,AT5G23350,AT5G23360	AT5G23360
Chr5	21237000	21238000	Chr5	21238000	21239000	2000	3.30103	214	6.87273e-11	6.40552e-07	21237000	21238000	21238000	21239000	214	1	AT5G52280,AT5G52290,AT5G52300	AT5G52300,AT5G52310,AT5G52320,AT5G52330
Chr5	26021000	26022000	Chr5	26022000	26023000	2000	3.30103	38	3.23169e-08	0.000115396	26021000	26022000	26022000	26023000	38	1	AT5G65140	AT5G65140
Chr5	25226000	25227000	Chr5	25227000	25228000	2000	3.30103	85	1.04605e-08	4.58008e-05	25226000	25227000	25227000	25228000	85	1	AT5G62800,AT5G62810,AT5G62820,AT5G62830	NA
Chr5	2171000	2172000	Chr5	2172000	2173000	2000	3.30103	176	6.20767e-11	5.8197e-07	2171000	2172000	2172000	2173000	176	1	AT5G06970,AT5G06980,AT5G06990,AT5G07000	AT5G07000
Chr5	25908000	25909000	Chr5	25909000	25910000	2000	3.30103	43	3.08048e-08	0.000110825	25908000	25909000	25909000	25910000	43	1	AT5G64810	AT5G64810,AT5G64813,AT5G64816,AT5G64820,AT5G64830,AT5G64840
Chr5	22409000	22410000	Chr5	22410000	22411000	2000	3.30103	225	6.59085e-06	0.00780766	22409000	22410000	22410000	22411000	225	1	AT5G55220,AT5G55230,AT5G55240,AT5G55250	AT5G55250,AT5G55260,AT5G55270,AT5G55280
Chr5	17259000	17260000	Chr5	17260000	17261000	2000	3.30103	249	7.00676e-06	0.00818099	17259000	17260000	17260000	17261000	249	1	AT5G43030	AT5G43030
Chr5	6886000	6887000	Chr5	6887000	6888000	2000	3.30103	55	2.93022e-06	0.00416596	6886000	6887000	6887000	6888000	55	1	AT5G20360,AT5G20370	AT5G20370,AT5G20380,AT5G20390,AT5G20400,AT5G20410
Chr5	26504000	26505000	Chr5	26505000	26506000	2000	3.30103	150	3.76007e-11	3.83629e-07	26504000	26505000	26505000	26506000	150	1	AT5G66350	AT5G66350,AT5G66360
Chr5	26890000	26891000	Chr5	26891000	26892000	2000	3.30103	30	1.61526e-05	0.0156146	26890000	26891000	26891000	26892000	30	1	NA	NA
Chr5	6041000	6042000	Chr5	6042000	6043000	2000	3.30103	148	1.16225e-11	1.36536e-07	6041000	6042000	6042000	6043000	148	1	AT5G18245,AT5G18250,AT5G18255,AT5G18260,AT5G18270	AT5G18270
Chr5	21301000	21302000	Chr5	21302000	21303000	2000	3.30103	115	1.53833e-14	3.99736e-10	21301000	21302000	21302000	21303000	115	1	AT5G52490,AT5G52495,AT5G52500	AT5G52500
Chr5	7259000	7260000	Chr5	7260000	7261000	2000	3.30103	82	6.81698e-19	5.34324e-14	7259000	7260000	7260000	7261000	82	1	AT5G21960	AT5G21970,AT5G21280
Chr5	22607000	22608000	Chr5	22608000	22609000	2000	3.30103	25	2.246e-05	0.0199381	22607000	22608000	22608000	22609000	25	1	AT5G55835,AT5G55840,AT5G55850,AT5G55855,AT5G55856	AT5G55856
Chr5	495000	496000	Chr5	496000	497000	2000	3.30103	147	1.8463e-15	6.17316e-11	495000	496000	496000	497000	147	1	AT5G02350	AT5G02350
Chr5	8620000	8621000	Chr5	8621000	8622000	2000	3.30103	76	1.43138e-06	0.00239461	8620000	8621000	8621000	8622000	76	1	AT5G25000,AT5G25010,AT5G25020,AT5G25030	AT5G25040
Chr5	22881000	22882000	Chr5	22882000	22883000	2000	3.30103	170	1.56977e-06	0.00257566	22881000	22882000	22882000	22883000	170	1	AT5G56510	AT5G56510
Chr5	2566000	2567000	Chr5	2567000	2568000	2000	3.30103	54	6.17281e-05	0.0419409	2566000	2567000	2567000	2568000	54	1	AT5G08000	AT5G08010,AT5G08020
Chr5	23061000	23062000	Chr5	23062000	23063000	2000	3.30103	44	4.37782e-05	0.0324821	23061000	23062000	23062000	23063000	44	1	AT5G56990	AT5G56990
Chr5	6340000	6341000	Chr5	6341000	6342000	2000	3.30103	97	7.77879e-05	0.0495568	6340000	6341000	6341000	6342000	97	1	AT5G18990	AT5G18990,AT5G19000,AT5G19010
Chr5	24062000	24063000	Chr5	24063000	24064000	2000	3.30103	43	1.27472e-05	0.0130258	24062000	24063000	24063000	24064000	43	1	AT5G59690,AT5G59700,AT5G59710,AT5G59720	AT5G59720,AT5G59730,AT5G59732
Chr5	26907000	26908000	Chr5	26908000	26909000	2000	3.30103	12	3.7213e-05	0.0288285	26907000	26908000	26908000	26909000	12	1	AT5G67420	NA
Chr5	17829000	17830000	Chr5	17830000	17831000	2000	3.30103	94	2.85139e-09	1.51818e-05	17829000	17830000	17830000	17831000	94	1	AT5G44250,AT5G44260	AT5G44260
Chr5	3253000	3254000	Chr5	3254000	3255000	2000	3.30103	91	5.3687e-07	0.00110263	3253000	3254000	3254000	3255000	91	1	AT5G10330,AT5G10336,AT5G10340	AT5G10340
Chr5	1949000	1950000	Chr5	1950000	1951000	2000	3.30103	148	5.40601e-06	0.00669471	1949000	1950000	1950000	1951000	148	1	AT5G06380	AT5G06380,AT5G06390,AT5G06400,AT5G06410
Chr5	17198000	17199000	Chr5	17199000	17200000	2000	3.30103	47	8.57346e-09	3.85988e-05	17198000	17199000	17199000	17200000	47	1	AT5G42880,AT5G42890,AT5G42895,AT5G42900	AT5G42900,AT5G42905
Chr5	3119000	3120000	Chr5	3120000	3121000	2000	3.30103	55	2.868e-07	0.000671858	3119000	3120000	3120000	3121000	55	1	AT5G09975,AT5G09976	AT5G09978
Chr5	25341000	25342000	Chr5	25342000	25343000	2000	3.30103	146	4.26381e-07	0.000919547	25341000	25342000	25342000	25343000	146	1	AT5G63180	AT5G63180,AT5G63190
Chr5	20678000	20679000	Chr5	20679000	20680000	2000	3.30103	83	1.17373e-05	0.0122317	20678000	20679000	20679000	20680000	83	1	NA	AT5G50820
Chr5	5406000	5407000	Chr5	5407000	5408000	2000	3.30103	46	6.16923e-05	0.0419225	5406000	5407000	5407000	5408000	46	1	AT5G16550,AT5G16560	AT5G16560
Chr5	13879000	13880000	Chr5	13880000	13881000	2000	3.30103	43	6.75362e-05	0.0448172	13879000	13880000	13880000	13881000	43	1	AT5G35695,AT5G35698,AT5G35700	NA
Chr5	22533000	22534000	Chr5	22534000	22535000	2000	3.30103	39	3.13781e-05	0.0253852	22533000	22534000	22534000	22535000	39	1	AT5G55600,AT5G55610,AT5G55620,AT5G55630,AT5G55640	AT5G55640
Chr5	7804000	7805000	Chr5	7805000	7806000	2000	3.30103	83	3.77049e-09	1.93445e-05	7804000	7805000	7805000	7806000	83	1	AT5G23190	AT5G23190
Chr5	23288000	23289000	Chr5	23289000	23290000	2000	3.30103	41	1.81176e-05	0.0170065	23288000	23289000	23289000	23290000	41	1	AT5G57480,AT5G57490,AT5G57500	AT5G57510
Chr5	16971000	16972000	Chr5	16972000	16973000	2000	3.30103	183	1.12476e-09	6.88577e-06	16971000	16972000	16972000	16973000	183	1	AT5G42430	AT5G42430
Chr5	24482000	24483000	Chr5	24483000	24484000	2000	3.30103	41	2.68555e-05	0.0226623	24482000	24483000	24483000	24484000	41	1	NA	AT5G60860
Chr5	2228000	2229000	Chr5	2229000	2230000	2000	3.30103	133	3.29798e-08	0.000117413	2228000	2229000	2229000	2230000	133	1	AT5G07180	AT5G07180
Chr5	26681000	26682000	Chr5	26682000	26683000	2000	3.30103	64	1.33782e-07	0.00036719	26681000	26682000	26682000	26683000	64	1	AT5G66816	AT5G66817
Chr5	7147000	7148000	Chr5	7148000	7149000	2000	3.30103	109	4.58399e-05	0.0336181	7147000	7148000	7148000	7149000	109	1	AT5G21040,AT5G21050	AT5G21050,AT5G21060
Chr5	16580000	16581000	Chr5	16581000	16582000	2000	3.30103	34	1.29797e-06	0.00223064	16580000	16581000	16581000	16582000	34	1	AT5G41410	AT5G41410
Chr5	20831000	20832000	Chr5	20832000	20833000	2000	3.30103	144	3.2036e-05	0.0257482	20831000	20832000	20832000	20833000	144	1	AT5G51250	AT5G51260,AT5G51270,AT5G51280
Chr5	8392000	8393000	Chr5	8393000	8394000	2000	3.30103	70	2.47327e-06	0.00366451	8392000	8393000	8393000	8394000	70	1	AT5G24550	AT5G24550
Chr5	5881000	5882000	Chr5	5882000	5883000	2000	3.30103	48	1.38826e-05	0.0139242	5881000	5882000	5882000	5883000	48	1	AT5G17810	AT5G17810
Chr5	4234000	4235000	Chr5	4235000	4236000	2000	3.30103	140	2.15957e-05	0.0193724	4234000	4235000	4235000	4236000	140	1	AT5G13250	AT5G13250
Chr5	17246000	17247000	Chr5	17247000	17248000	2000	3.30103	73	5.58633e-05	0.0388844	17246000	17247000	17247000	17248000	73	1	AT5G42960,AT5G42965,AT5G42970,AT5G42980,AT5G42990,AT5G43000	AT5G43000,AT5G43010
Chr5	17712000	17713000	Chr5	17713000	17714000	2000	3.30103	53	1.07417e-06	0.00191209	17712000	17713000	17713000	17714000	53	1	AT5G43990,AT5G44000,AT5G44005,AT5G44010,AT5G44020	AT5G44020,AT5G44030
Chr5	21451000	21452000	Chr5	21452000	21453000	2000	3.30103	66	4.33052e-07	0.000929323	21451000	21452000	21452000	21453000	66	1	AT5G52890	AT5G52900,AT5G52901,AT5G52910
Chr5	464000	465000	Chr5	465000	466000	2000	3.30103	39	3.10698e-05	0.0251913	464000	465000	465000	466000	39	1	AT5G02250,AT5G02260	AT5G02260,AT5G02270,AT5G02280
Chr5	23955000	23956000	Chr5	23956000	23957000	2000	3.30103	33	7.99639e-13	1.35577e-08	23955000	23956000	23956000	23957000	33	1	AT5G59385,AT5G59390	AT5G59390,AT5G59395,AT5G59400,AT5G59410,AT5G59420
Chr5	39000	40000	Chr5	40000	41000	2000	3.30103	33	1.17609e-12	1.91918e-08	39000	40000	40000	41000	33	1	AT5G01100	NA
Chr5	16979000	16980000	Chr5	16980000	16981000	2000	3.30103	64	5.93566e-06	0.00719208	16979000	16980000	16980000	16981000	64	1	AT5G42450,AT5G42460	AT5G42460,AT5G42470,AT5G42480,AT5G42490
Chr5	19299000	19300000	Chr5	19300000	19301000	2000	3.30103	67	8.76747e-06	0.00975781	19299000	19300000	19300000	19301000	67	1	AT5G47590,AT5G47600	AT5G47600,AT5G47610,AT5G47620,AT5G47630,AT5G47635,AT5G47640,AT5G47650
Chr5	25847000	25848000	Chr5	25848000	25849000	2000	3.30103	39	1.67093e-11	1.87538e-07	25847000	25848000	25848000	25849000	39	1	AT5G64640,AT5G64650,AT5G64660	NA
Chr5	22625000	22626000	Chr5	22626000	22627000	2000	3.30103	143	8.69592e-12	1.06336e-07	22625000	22626000	22626000	22627000	143	1	AT5G55893	NA
Chr5	8066000	8067000	Chr5	8067000	8068000	2000	3.30103	77	9.91188e-08	0.000287093	8066000	8067000	8067000	8068000	77	1	AT5G23900,AT5G23903	AT5G23903,AT5G23908,AT5G23910
Chr5	25871000	25872000	Chr5	25872000	25873000	2000	3.30103	58	5.77871e-06	0.00704134	25871000	25872000	25872000	25873000	58	1	AT5G64710	AT5G64710,AT5G64720,AT5G64730,AT5G64735
Chr5	5010000	5011000	Chr5	5011000	5012000	2000	3.30103	105	4.1171e-17	2.28894e-12	5010000	5011000	5011000	5012000	105	1	AT5G15410,AT5G15420,AT5G15430	AT5G15430,AT5G15440,AT5G15450,AT5G15460
Chr5	21972000	21973000	Chr5	21973000	21974000	2000	3.30103	35	7.76158e-06	0.00889025	21972000	21973000	21973000	21974000	35	1	AT5G54145	AT5G54145
Chr5	539000	540000	Chr5	540000	541000	2000	3.30103	89	4.52435e-12	6.0594e-08	539000	540000	540000	541000	89	1	AT5G02460	AT5G02460,AT5G02470,AT5G02480
Chr5	873000	874000	Chr5	874000	875000	2000	3.30103	82	3.8428e-08	0.000132948	873000	874000	874000	875000	82	1	AT5G03490,AT5G03495	AT5G03495
Chr5	4623000	4624000	Chr5	4624000	4625000	2000	3.30103	106	1.01624e-07	0.000292529	4623000	4624000	4624000	4625000	106	1	AT5G14340	AT5G14340,AT5G14345,AT5G14350,AT5G14360,AT5G14370
Chr5	23126000	23127000	Chr5	23127000	23128000	2000	3.30103	62	6.7813e-13	1.1598e-08	23126000	23127000	23127000	23128000	62	1	AT5G57120,AT5G57123	AT5G57123
Chr5	15952000	15953000	Chr5	15953000	15954000	2000	3.30103	33	3.88377e-06	0.00517983	15952000	15953000	15953000	15954000	33	1	AT5G39830,AT5G39840,AT5G39850	AT5G39860
Chr5	2098000	2099000	Chr5	2099000	2100000	2000	3.30103	68	1.07317e-06	0.00191102	2098000	2099000	2099000	2100000	68	1	AT5G06780,AT5G06790	NA
Chr5	3521000	3522000	Chr5	3522000	3523000	2000	3.30103	41	6.67251e-06	0.00787922	3521000	3522000	3522000	3523000	41	1	NA	AT5G11090
Chr5	531000	532000	Chr5	532000	533000	2000	3.30103	68	6.50225e-11	6.07206e-07	531000	532000	532000	533000	68	1	AT5G02430,AT5G02435,AT5G02440	AT5G02440,AT5G02450
Chr5	1789000	1790000	Chr5	1790000	1791000	2000	3.30103	173	6.21563e-06	0.00744266	1789000	1790000	1790000	1791000	173	1	AT5G05920,AT5G05930,AT5G05940,AT5G05945,AT5G05950	AT5G05960,AT5G05965,AT5G05970,AT5G05980
Chr5	1947000	1948000	Chr5	1948000	1949000	2000	3.30103	111	3.20257e-06	0.00446033	1947000	1948000	1948000	1949000	111	1	AT5G06350,AT5G06360,AT5G06370	AT5G06370
Chr5	16298000	16299000	Chr5	16299000	16300000	2000	3.30103	98	4.65362e-07	0.000980183	16298000	16299000	16299000	16300000	98	1	AT5G40680,AT5G40690,AT5G40700,AT5G40710,AT5G40720	AT5G40720,AT5G40730
Chr5	1048000	1049000	Chr5	1049000	1050000	2000	3.30103	62	5.45099e-06	0.006738	1048000	1049000	1049000	1050000	62	1	AT5G03900	AT5G03900,AT5G03905,AT5G03910,AT5G03920,AT5G03930
Chr5	5346000	5347000	Chr5	5347000	5348000	2000	3.30103	121	7.22392e-05	0.0469972	5346000	5347000	5347000	5348000	121	1	AT5G16290,AT5G16300,AT5G16310,AT5G16320,AT5G16330	AT5G16340
Chr5	1040000	1041000	Chr5	1041000	1042000	2000	3.30103	74	9.67499e-06	0.0105292	1040000	1041000	1041000	1042000	74	1	AT5G03870,AT5G03880	AT5G03880
Chr5	1733000	1734000	Chr5	1734000	1735000	2000	3.30103	101	6.31004e-08	0.000198617	1733000	1734000	1734000	1735000	101	1	NA	AT5G05770
Chr5	5277000	5278000	Chr5	5278000	5279000	2000	3.30103	95	8.72806e-09	3.9221e-05	5277000	5278000	5278000	5279000	95	1	AT5G16150,AT5G16160,AT5G16170	AT5G16170,AT5G16180,AT5G16190
Chr5	22056000	22057000	Chr5	22057000	22058000	2000	3.30103	79	2.25167e-05	0.019977	22056000	22057000	22057000	22058000	79	1	AT5G54290,AT5G54300	AT5G54310
Chr5	16531000	16532000	Chr5	16532000	16533000	2000	3.30103	130	6.09387e-06	0.00733913	16531000	16532000	16532000	16533000	130	1	AT5G41315	AT5G41315,AT5G41320,AT5G41330,AT5G41340,AT5G41350
Chr5	24766000	24767000	Chr5	24767000	24768000	2000	3.30103	28	5.9863e-05	0.0409062	24766000	24767000	24767000	24768000	28	1	AT5G61600	AT5G61600
Chr5	14519000	14520000	Chr5	14520000	14521000	2000	3.30103	30	5.36093e-05	0.0377886	14519000	14520000	14520000	14521000	30	1	AT5G36870	AT5G36870
Chr5	24323000	24324000	Chr5	24324000	24325000	2000	3.30103	97	3.56594e-05	0.0278772	24323000	24324000	24324000	24325000	97	1	AT5G60480	AT5G60480,AT5G60490
Chr5	6467000	6468000	Chr5	6468000	6469000	2000	3.30103	52	1.49998e-08	6.22012e-05	6467000	6468000	6468000	6469000	52	1	AT5G19190,AT5G19200,AT5G19210,AT5G19220,AT5G19221,AT5G19230	AT5G19230,AT5G19240
Chr5	16330000	16331000	Chr5	16331000	16332000	2000	3.30103	90	3.22518e-06	0.00448399	16330000	16331000	16331000	16332000	90	1	AT5G40780,AT5G40790	AT5G40790,AT5G40800
Chr5	3476000	3477000	Chr5	3477000	3478000	2000	3.30103	46	5.46415e-07	0.00111695	3476000	3477000	3477000	3478000	46	1	AT5G10990	AT5G10990,AT5G11000
Chr5	22227000	22228000	Chr5	22228000	22229000	2000	3.30103	101	3.7786e-10	2.77945e-06	22227000	22228000	22228000	22229000	101	1	AT5G54710	AT5G54710
Chr5	762000	763000	Chr5	763000	764000	2000	3.30103	55	1.2463e-06	0.00215824	762000	763000	763000	764000	55	1	AT5G03190,AT5G03200,AT5G03204,AT5G03210	AT5G03210,AT5G03220
Chr5	16585000	16586000	Chr5	16586000	16587000	2000	3.30103	49	1.15495e-05	0.0120952	16585000	16586000	16586000	16587000	49	1	AT5G41420	AT5G41430,AT5G41440,AT5G41450
Chr5	23228000	23229000	Chr5	23229000	23230000	2000	3.30103	78	2.50828e-09	1.35511e-05	23228000	23229000	23229000	23230000	78	1	AT5G57340	AT5G57340,AT5G57345,AT5G57350
Chr5	3239000	3240000	Chr5	3240000	3241000	2000	3.30103	47	2.41979e-07	0.000588486	3239000	3240000	3240000	3241000	47	1	AT5G10290,AT5G10300	AT5G10300,AT5G10310,AT5G10320
Chr5	23119000	23120000	Chr5	23120000	23121000	2000	3.30103	21	4.68912e-06	0.00598822	23119000	23120000	23120000	23121000	21	1	AT5G57110	NA
Chr5	1007000	1008000	Chr5	1008000	1009000	2000	3.30103	221	4.96378e-06	0.00625873	1007000	1008000	1008000	1009000	221	1	AT5G03795	AT5G03795,AT5G03800,AT5G03810
Chr5	15201000	15202000	Chr5	15202000	15203000	2000	3.30103	91	8.341e-09	3.77299e-05	15201000	15202000	15202000	15203000	91	1	AT5G38070,AT5G38080,AT5G38090,AT5G38100	AT5G38110
Chr5	24085000	24086000	Chr5	24086000	24087000	2000	3.30103	70	1.06641e-06	0.00190182	24085000	24086000	24086000	24087000	70	1	NA	NA
Chr5	2624000	2625000	Chr5	2625000	2626000	2000	3.30103	38	5.27004e-05	0.0373019	2624000	2625000	2625000	2626000	38	1	NA	AT5G08160,AT5G08170,AT5G08180,AT5G08185,AT5G08190
Chr5	22090000	22091000	Chr5	22091000	22092000	2000	3.30103	90	4.00849e-12	5.47954e-08	22090000	22091000	22091000	22092000	90	1	AT5G54390,AT5G54400	AT5G54400,AT5G54410,AT5G54420,AT5G54430,AT5G54440
Chr5	7641000	7642000	Chr5	7642000	7643000	2000	3.30103	120	2.49915e-06	0.00369827	7641000	7642000	7642000	7643000	120	1	AT5G22850,AT5G22860	AT5G22860,AT5G22870
Chr5	26055000	26056000	Chr5	26056000	26057000	2000	3.30103	27	6.48128e-06	0.00769848	26055000	26056000	26056000	26057000	27	1	NA	AT5G65210
Chr5	3580000	3581000	Chr5	3581000	3582000	2000	3.30103	178	1.98716e-15	6.55249e-11	3580000	3581000	3581000	3582000	178	1	AT5G11220,AT5G11225,AT5G11230	AT5G11230,AT5G11240,AT5G11250
Chr5	21273000	21274000	Chr5	21274000	21275000	2000	3.30103	68	5.14933e-05	0.0366755	21273000	21274000	21274000	21275000	68	1	AT5G52400	AT5G52400
Chr5	630000	631000	Chr5	631000	632000	2000	3.30103	68	2.04156e-10	1.66007e-06	630000	631000	631000	632000	68	1	AT5G02760,AT5G02770,AT5G02780	AT5G02780,AT5G02790,AT5G02800,AT5G02810
Chr5	1670000	1671000	Chr5	1671000	1672000	2000	3.30103	22	2.36684e-06	0.00354971	1670000	1671000	1671000	1672000	22	1	AT5G05570,AT5G05580,AT5G05590	AT5G05598
Chr5	18590000	18591000	Chr5	18591000	18592000	2000	3.30103	84	2.18323e-07	0.000542265	18590000	18591000	18591000	18592000	84	1	AT5G45810,AT5G45820,AT5G45830	AT5G45830
Chr5	18552000	18553000	Chr5	18553000	18554000	2000	3.30103	149	3.70862e-11	3.79697e-07	18552000	18553000	18553000	18554000	149	1	AT5G45710,AT5G45720,AT5G45715,AT5G45730	AT5G45730,AT5G45740,AT5G45745,AT5G45750,AT5G45760,AT5G45770
Chr5	22650000	22651000	Chr5	22651000	22652000	2000	3.30103	28	8.34058e-06	0.0094053	22650000	22651000	22651000	22652000	28	1	AT5G55920	NA
Chr5	523000	524000	Chr5	524000	525000	2000	3.30103	20	1.9334e-05	0.0178561	523000	524000	524000	525000	20	1	AT5G02420	AT5G02420
Chr5	3739000	3740000	Chr5	3740000	3741000	2000	3.30103	128	4.27715e-07	0.000921178	3739000	3740000	3740000	3741000	128	1	AT5G11620	AT5G11620,AT5G11630,AT5G11640
Chr5	25173000	25174000	Chr5	25174000	25175000	2000	3.30103	40	5.64552e-08	0.000181647	25173000	25174000	25174000	25175000	40	1	AT5G62680	NA
Chr5	143000	144000	Chr5	144000	145000	2000	3.30103	122	1.55846e-25	3.23973e-20	143000	144000	144000	145000	122	1	AT5G01340	AT5G01340,AT5G01350,AT5G01360
Chr5	3864000	3865000	Chr5	3865000	3866000	2000	3.30103	48	3.12478e-09	1.64181e-05	3864000	3865000	3865000	3866000	48	1	AT5G11960,AT5G11970	AT5G11977
Chr5	14876000	14877000	Chr5	14877000	14878000	2000	3.30103	27	5.06296e-05	0.036206	14876000	14877000	14877000	14878000	27	1	AT5G37474	NA
Chr5	23409000	23410000	Chr5	23410000	23411000	2000	3.30103	93	5.32007e-05	0.037567	23409000	23410000	23410000	23411000	93	1	AT5G57760,AT5G57770,AT5G57780,AT5G57785	AT5G57790,AT5G57800
Chr5	1266000	1267000	Chr5	1267000	1268000	2000	3.30103	36	1.06221e-05	0.011344	1266000	1267000	1267000	1268000	36	1	AT5G04440,AT5G04460,AT5G04470	AT5G04470
Chr5	26087000	26088000	Chr5	26088000	26089000	2000	3.30103	70	6.27728e-08	0.000197977	26087000	26088000	26088000	26089000	70	1	AT5G65280	AT5G65280,AT5G65290,AT5G65300,AT5G65305
Chr5	4054000	4055000	Chr5	4055000	4056000	2000	3.30103	29	4.52178e-05	0.0333024	4054000	4055000	4055000	4056000	29	1	AT5G12460,AT5G12470,AT5G12480,AT5G12840	AT5G12850
Chr5	2200000	2201000	Chr5	2201000	2202000	2000	3.30103	196	1.49883e-11	1.72419e-07	2200000	2201000	2201000	2202000	196	1	AT5G07080	AT5G07080,AT5G07090,AT5G07100,AT5G07110,AT5G07120,AT5G07130
Chr5	17497000	17498000	Chr5	17498000	17499000	2000	3.30103	176	2.00885e-15	6.57866e-11	17497000	17498000	17498000	17499000	176	1	AT5G43530,AT5G43535,AT5G43540,AT5G43550	AT5G43550
Chr5	20871000	20872000	Chr5	20872000	20873000	2000	3.30103	126	1.18645e-07	0.000333101	20871000	20872000	20872000	20873000	126	1	AT5G51350,AT5G51360	AT5G51360,AT5G51370
Chr5	2590000	2591000	Chr5	2591000	2592000	2000	3.30103	61	1.48238e-07	0.000396622	2590000	2591000	2591000	2592000	61	1	AT5G08080	AT5G08080,AT5G08090
Chr5	2007000	2008000	Chr5	2008000	2009000	2000	3.30103	42	3.14373e-05	0.0254174	2007000	2008000	2008000	2009000	42	1	AT5G06540,AT5G06550,AT5G06560,AT5G06570	AT5G06570
Chr5	6164000	6165000	Chr5	6165000	6166000	2000	3.30103	162	1.48847e-12	2.32574e-08	6164000	6165000	6165000	6166000	162	1	AT5G18560	AT5G18560,AT5G18570
Chr5	2651000	2652000	Chr5	2652000	2653000	2000	3.30103	62	2.74363e-06	0.00398481	2651000	2652000	2652000	2653000	62	1	AT5G08230,AT5G08210,AT5G08220,AT5G08240	AT5G08240
Chr5	2949000	2950000	Chr5	2950000	2951000	2000	3.30103	144	6.62523e-05	0.0441248	2949000	2950000	2950000	2951000	144	1	AT5G09460,AT5G09461,AT5G09462,AT5G09463,AT5G09470	AT5G09470,AT5G09480
Chr5	13363000	13364000	Chr5	13364000	13365000	2000	3.30103	61	1.26877e-05	0.0129748	13363000	13364000	13364000	13365000	61	1	AT5G35090,AT5G35100,AT5G35110	AT5G35110
Chr5	8552000	8553000	Chr5	8553000	8554000	2000	3.30103	105	1.77353e-21	2.17428e-16	8552000	8553000	8553000	8554000	105	1	AT5G24879,AT5G24880	AT5G24880
Chr5	22900000	22901000	Chr5	22901000	22902000	2000	3.30103	182	7.72525e-12	9.59424e-08	22900000	22901000	22901000	22902000	182	1	AT5G56560	AT5G56560
Chr5	17282000	17283000	Chr5	17283000	17284000	2000	3.30103	106	1.71286e-06	0.00275559	17282000	17283000	17283000	17284000	106	1	NA	NA
Chr5	4572000	4573000	Chr5	4573000	4574000	2000	3.30103	54	2.39387e-06	0.00358238	4572000	4573000	4573000	4574000	54	1	AT5G14150,AT5G14160,AT5G14170,AT5G14180	AT5G14180,AT5G14200,AT5G14210,AT5G14220
Chr5	5355000	5356000	Chr5	5356000	5357000	2000	3.30103	54	4.66338e-05	0.0339994	5355000	5356000	5356000	5357000	54	1	AT5G16350,AT5G16360	AT5G16360,AT5G16370,AT5G16375,AT5G16380,AT5G16390,AT5G16400
Chr5	330000	331000	Chr5	331000	332000	2000	3.30103	18	4.89541e-06	0.00619704	330000	331000	331000	332000	18	1	NA	AT5G01849
Chr5	2981000	2982000	Chr5	2982000	2983000	2000	3.30103	73	3.79695e-05	0.029274	2981000	2982000	2982000	2983000	73	1	AT5G09570,AT5G09580,AT5G09585,AT5G09590,AT5G09600,AT5G09610	AT5G09610,AT5G09620
Chr5	16852000	16853000	Chr5	16853000	16854000	2000	3.30103	84	1.37692e-06	0.00232136	16852000	16853000	16853000	16854000	84	1	AT5G42146,AT5G42150,AT5G42170,AT5G42180	AT5G42180,AT5G42190
Chr5	8983000	8984000	Chr5	8984000	8985000	2000	3.30103	56	1.41505e-07	0.00038246	8983000	8984000	8984000	8985000	56	1	NA	NA
Chr5	287000	288000	Chr5	288000	289000	2000	3.30103	51	1.02369e-14	2.8292e-10	287000	288000	288000	289000	51	1	AT5G01747	NA
Chr5	25156000	25157000	Chr5	25157000	25158000	2000	3.30103	122	1.18853e-15	4.37129e-11	25156000	25157000	25157000	25158000	122	1	AT5G62630,AT5G62640,AT5G62650,AT5G62660	AT5G62660,AT5G62670
Chr5	8805000	8806000	Chr5	8806000	8807000	2000	3.30103	158	5.66856e-05	0.0392681	8805000	8806000	8806000	8807000	158	1	AT5G25360,AT5G25370	AT5G25370
Chr5	5238000	5239000	Chr5	5239000	5240000	2000	3.30103	43	3.29118e-08	0.000117258	5238000	5239000	5239000	5240000	43	1	AT5G16030	AT5G16030,AT5G16040,AT5G16050,AT5G16060
Chr5	14601000	14602000	Chr5	14602000	14603000	2000	3.30103	27	6.23398e-05	0.0421946	14601000	14602000	14602000	14603000	27	1	AT5G36940,AT5G36950,AT5G36960	AT5G36970
Chr5	7229000	7230000	Chr5	7230000	7231000	2000	3.30103	27	4.79849e-06	0.00609857	7229000	7230000	7230000	7231000	27	1	AT5G21482	AT5G21482
Chr5	17682000	17683000	Chr5	17683000	17684000	2000	3.30103	161	1.08958e-07	0.000308807	17682000	17683000	17683000	17684000	161	1	AT5G43920,AT5G43930,AT5G43935	AT5G43935,AT5G43940,AT5G43950,AT5G43960,AT5G43970
Chr5	7653000	7654000	Chr5	7654000	7655000	2000	3.30103	136	4.07928e-11	4.08891e-07	7653000	7654000	7654000	7655000	136	1	AT5G22875,AT5G22880,AT5G22890	AT5G22890
Chr5	15226000	15227000	Chr5	15227000	15228000	2000	3.30103	46	5.33309e-06	0.00662201	15226000	15227000	15227000	15228000	46	1	AT5G38120,AT5G38130,AT5G38140,AT5G38150,AT5G38155,AT5G38160	AT5G38170,AT5G38180
Chr5	24504000	24505000	Chr5	24505000	24506000	2000	3.30103	120	5.35681e-06	0.00664737	24504000	24505000	24505000	24506000	120	1	AT5G60910	AT5G60910,AT5G60920,AT5G60930
Chr5	24395000	24396000	Chr5	24396000	24397000	2000	3.30103	25	1.50661e-06	0.00249342	24395000	24396000	24396000	24397000	25	1	NA	AT5G60690,AT5G60700
Chr5	24480000	24481000	Chr5	24481000	24482000	2000	3.30103	48	3.17174e-25	5.83266e-20	24480000	24481000	24481000	24482000	48	1	AT5G60830,AT5G60840,AT5G60850	AT5G60850
Chr5	26024000	26025000	Chr5	26025000	26026000	2000	3.30103	29	1.08535e-07	0.000307974	26024000	26025000	26025000	26026000	29	1	NA	NA
Chr5	26633000	26634000	Chr5	26634000	26635000	2000	3.30103	118	5.68379e-13	1.01025e-08	26633000	26634000	26634000	26635000	118	1	NA	AT5G66700,AT5G66710,AT5G66720,AT5G66730
Chr5	26331000	26332000	Chr5	26332000	26333000	2000	3.30103	210	2.48413e-15	7.81398e-11	26331000	26332000	26332000	26333000	210	1	AT5G65800	AT5G65800
Chr5	21159000	21160000	Chr5	21160000	21161000	2000	3.30103	174	1.26403e-14	3.37634e-10	21159000	21160000	21160000	21161000	174	1	NA	NA
Chr5	26053000	26054000	Chr5	26054000	26055000	2000	3.30103	16	1.72849e-05	0.0164563	26053000	26054000	26054000	26055000	16	1	AT5G65200,AT5G65205,AT5G65207	NA
Chr5	16651000	16652000	Chr5	16652000	16653000	2000	3.30103	89	9.8752e-06	0.0107066	16651000	16652000	16652000	16653000	89	1	AT5G41614,AT5G41620,AT5G41630	AT5G41640
Chr5	4613000	4614000	Chr5	4614000	4615000	2000	3.30103	196	1.14911e-06	0.00202181	4613000	4614000	4614000	4615000	196	1	AT5G14260,AT5G14270,AT5G14280,AT5G14290,AT5G14300	AT5G14290,AT5G14300,AT5G14310
Chr5	16593000	16594000	Chr5	16594000	16595000	2000	3.30103	29	5.06867e-05	0.036236	16593000	16594000	16594000	16595000	29	1	AT5G41460,AT5G41470	AT5G41470,AT5G41480
Chr5	13833000	13834000	Chr5	13834000	13835000	2000	3.30103	69	6.07609e-06	0.00732326	13833000	13834000	13834000	13835000	69	1	AT5G35620,AT5G35630,AT5G35631	AT5G35640
Chr5	22576000	22577000	Chr5	22577000	22578000	2000	3.30103	141	2.11054e-05	0.0190516	22576000	22577000	22577000	22578000	141	1	AT5G55780	AT5G55780
Chr5	24533000	24534000	Chr5	24534000	24535000	2000	3.30103	43	1.50627e-05	0.0147912	24533000	24534000	24534000	24535000	43	1	AT5G60940,AT5G60945,AT5G60950,AT5G60960,AT5G60963,AT5G60964,AT5G60966	NA
Chr5	15489000	15490000	Chr5	15490000	15491000	2000	3.30103	54	5.67902e-05	0.0393064	15489000	15490000	15490000	15491000	54	1	AT5G38700	AT5G38700
Chr5	26666000	26667000	Chr5	26667000	26668000	2000	3.30103	105	5.36642e-18	3.51482e-13	26666000	26667000	26667000	26668000	105	1	AT5G66790	AT5G66790
Chr5	12596000	12597000	Chr5	12597000	12598000	2000	3.30103	77	1.71841e-06	0.00275987	12596000	12597000	12597000	12598000	77	1	NA	AT5G33355
Chr5	1926000	1927000	Chr5	1927000	1928000	2000	3.30103	63	1.68847e-08	6.80694e-05	1926000	1927000	1927000	1928000	63	1	AT5G06300	AT5G06310
Chr5	16501000	16502000	Chr5	16502000	16503000	2000	3.30103	175	1.674e-14	4.28013e-10	16501000	16502000	16502000	16503000	175	1	AT5G41200,AT5G41210,AT5G41220,AT5G41240,AT5G41250	AT5G41250
Chr5	22898000	22899000	Chr5	22899000	22900000	2000	3.30103	47	4.19205e-05	0.0314454	22898000	22899000	22899000	22900000	47	1	AT5G56540,AT5G56550	AT5G56560
Chr5	21384000	21385000	Chr5	21385000	21386000	2000	3.30103	45	1.5563e-05	0.0151642	21384000	21385000	21385000	21386000	45	1	AT5G52750	AT5G52760,AT5G52770,AT5G52780,AT5G52790
Chr5	20560000	20561000	Chr5	20561000	20562000	2000	3.30103	90	1.36615e-12	2.16289e-08	20560000	20561000	20561000	20562000	90	1	AT5G50490	AT5G50490,AT5G50500
Chr5	22917000	22918000	Chr5	22918000	22919000	2000	3.30103	84	7.72267e-06	0.00885257	22917000	22918000	22918000	22919000	84	1	AT5G56610	AT5G56610,AT5G56620
Chr5	16179000	16180000	Chr5	16180000	16181000	2000	3.30103	92	3.83288e-10	2.81073e-06	16179000	16180000	16180000	16181000	92	1	NA	AT5G40440,AT5G40450
Chr5	7914000	7915000	Chr5	7915000	7916000	2000	3.30103	129	2.99975e-07	0.000694893	7914000	7915000	7915000	7916000	129	1	AT5G23460,AT5G23470	AT5G23480,AT5G23490
Chr5	22140000	22141000	Chr5	22141000	22142000	2000	3.30103	97	1.33402e-05	0.0135191	22140000	22141000	22141000	22142000	97	1	NA	NA
Chr5	8687000	8688000	Chr5	8688000	8689000	2000	3.30103	73	2.98281e-11	3.14825e-07	8687000	8688000	8688000	8689000	73	1	AT5G25160	AT5G25160
Chr5	487000	488000	Chr5	488000	489000	2000	3.30103	205	7.77461e-15	2.19955e-10	487000	488000	488000	489000	205	1	AT5G02320,AT5G02330	AT5G02330
Chr5	25086000	25087000	Chr5	25087000	25088000	2000	3.30103	41	1.81686e-05	0.0170498	25086000	25087000	25087000	25088000	41	1	NA	NA
Chr5	20190000	20191000	Chr5	20191000	20192000	2000	3.30103	81	6.7432e-07	0.00132679	20190000	20191000	20191000	20192000	81	1	AT5G49690	AT5G49690,AT5G49700,AT5G49710,AT5G49720
Chr5	24095000	24096000	Chr5	24096000	24097000	2000	3.30103	96	7.16676e-06	0.00833726	24095000	24096000	24096000	24097000	96	1	AT5G59790,AT5G59800	AT5G59800,AT5G59810
Chr5	4914000	4915000	Chr5	4915000	4916000	2000	3.30103	84	3.31694e-05	0.0264187	4914000	4915000	4915000	4916000	84	1	AT5G15150	AT5G15150
Chr5	7798000	7799000	Chr5	7799000	7800000	2000	3.30103	142	4.68063e-05	0.0341044	7798000	7799000	7799000	7800000	142	1	AT5G23150,AT5G23155,AT5G23160,AT5G23170	AT5G23170
Chr5	17023000	17024000	Chr5	17024000	17025000	2000	3.30103	148	2.58346e-10	2.00523e-06	17023000	17024000	17024000	17025000	148	1	AT5G42560,AT5G42567,AT5G42570,AT5G42580	AT5G42580
Chr5	21292000	21293000	Chr5	21293000	21294000	2000	3.30103	63	8.44902e-09	3.81463e-05	21292000	21293000	21293000	21294000	63	1	AT5G52450,AT5G52460	AT5G52460,AT5G52470,AT5G52471,AT5G52480
Chr5	6790000	6791000	Chr5	6791000	6792000	2000	3.30103	79	4.37418e-14	1.01838e-09	6790000	6791000	6791000	6792000	79	1	AT5G20070,AT5G20080,AT5G20090,AT5G20100	AT5G20110
Chr5	26746000	26747000	Chr5	26747000	26748000	2000	3.30103	65	8.9224e-07	0.00164648	26746000	26747000	26747000	26748000	65	1	AT5G67000	AT5G67000
Chr5	17983000	17984000	Chr5	17984000	17985000	2000	3.30103	41	6.40746e-05	0.0430277	17983000	17984000	17984000	17985000	41	1	AT5G44578,AT5G44580,AT5G44582	AT5G44585
Chr5	25064000	25065000	Chr5	25065000	25066000	2000	3.30103	143	4.57047e-07	0.000966522	25064000	25065000	25065000	25066000	143	1	AT5G62420	AT5G62420,AT5G62430
Chr5	23052000	23053000	Chr5	23053000	23054000	2000	3.30103	49	2.76235e-06	0.00400106	23052000	23053000	23053000	23054000	49	1	NA	NA
Chr5	26748000	26749000	Chr5	26749000	26750000	2000	3.30103	86	4.76992e-11	4.66385e-07	26748000	26749000	26749000	26750000	86	1	NA	AT5G67010,AT5G67020
Chr5	22581000	22582000	Chr5	22582000	22583000	2000	3.30103	234	6.25442e-08	0.000197647	22581000	22582000	22582000	22583000	234	1	AT5G55790,AT5G55800	AT5G55800
Chr5	7902000	7903000	Chr5	7903000	7904000	2000	3.30103	76	1.08556e-08	4.70991e-05	7902000	7903000	7903000	7904000	76	1	NA	AT5G23440,AT5G23450
Chr5	24346000	24347000	Chr5	24347000	24348000	2000	3.30103	108	2.99145e-06	0.00423038	24346000	24347000	24347000	24348000	108	1	AT5G60560	AT5G60560,AT5G60570
Chr5	26125000	26126000	Chr5	26126000	26127000	2000	3.30103	30	5.59037e-05	0.0389048	26125000	26126000	26126000	26127000	30	1	AT5G65380	AT5G65380,AT5G65390
Chr5	580000	581000	Chr5	581000	582000	2000	3.30103	76	2.24938e-15	7.16992e-11	580000	581000	581000	582000	76	1	AT5G02580	AT5G02590,AT5G02600,AT5G02610,AT5G02615,AT5G02620,AT5G02630
Chr5	5899000	5900000	Chr5	5900000	5901000	2000	3.30103	203	1.27305e-20	1.32321e-15	5899000	5900000	5900000	5901000	203	1	AT5G17847,AT5G17850	AT5G17850
Chr5	15974000	15975000	Chr5	15975000	15976000	2000	3.30103	130	1.958e-06	0.00306841	15974000	15975000	15975000	15976000	130	1	AT5G39865,AT5G39870,AT5G39880,AT5G39890	AT5G39890,AT5G39895,AT5G39900
Chr5	13906000	13907000	Chr5	13907000	13908000	2000	3.30103	47	6.58036e-05	0.043899	13906000	13907000	13907000	13908000	47	1	NA	AT5G35737
Chr5	25449000	25450000	Chr5	25450000	25451000	2000	3.30103	205	9.29738e-08	0.000272218	25449000	25450000	25450000	25451000	205	1	AT5G63560	AT5G63560,AT5G63570,AT5G63580,AT5G63590,AT5G63595,AT5G63600
Chr5	17810000	17811000	Chr5	17811000	17812000	2000	3.30103	221	1.08374e-20	1.15148e-15	17810000	17811000	17811000	17812000	221	1	AT5G44200,AT5G44210,AT5G44220	AT5G44220,AT5G44230,AT5G44240
Chr5	24916000	24917000	Chr5	24917000	24918000	2000	3.30103	27	2.27259e-08	8.72058e-05	24916000	24917000	24917000	24918000	27	1	AT5G61997,AT5G62000,AT5G62020	AT5G62020,AT5G62030
Chr5	3502000	3503000	Chr5	3503000	3504000	2000	3.30103	158	1.21331e-12	1.96649e-08	3502000	3503000	3503000	3504000	158	1	AT5G11050	AT5G11050
Chr5	8320000	8321000	Chr5	8321000	8322000	2000	3.30103	58	1.05204e-06	0.00188741	8320000	8321000	8321000	8322000	58	1	AT5G24370	AT5G24370,AT5G24380
Chr5	22719000	22720000	Chr5	22720000	22721000	2000	3.30103	96	2.23239e-07	0.000552465	22719000	22720000	22720000	22721000	96	1	AT5G56110	AT5G56110,AT5G56120,AT5G56130,AT5G56140,AT5G56150
Chr5	5304000	5305000	Chr5	5305000	5306000	2000	3.30103	93	1.36044e-10	1.1678e-06	5304000	5305000	5305000	5306000	93	1	AT5G16210,AT5G16220,AT5G16230,AT5G16235	AT5G16230,AT5G16235,AT5G16240,AT5G16250,AT5G16260
Chr5	17649000	17650000	Chr5	17650000	17651000	2000	3.30103	120	5.29763e-14	1.21193e-09	17649000	17650000	17650000	17651000	120	1	AT5G43890	AT5G43890
Chr5	23247000	23248000	Chr5	23248000	23249000	2000	3.30103	197	4.39127e-05	0.0325583	23247000	23248000	23248000	23249000	197	1	AT5G57380	AT5G57380
Chr5	2447000	2448000	Chr5	2448000	2449000	2000	3.30103	167	2.02028e-11	2.24118e-07	2447000	2448000	2448000	2449000	167	1	AT5G07690	AT5G07690
Chr5	15846000	15847000	Chr5	15847000	15848000	2000	3.30103	154	5.77113e-06	0.0070373	15846000	15847000	15847000	15848000	154	1	AT5G39570	AT5G39580,AT5G39581,AT5G39590,AT5G39600
Chr5	25862000	25863000	Chr5	25863000	25864000	2000	3.30103	34	8.03203e-07	0.00151373	25862000	25863000	25863000	25864000	34	1	AT5G64690	AT5G64690
Chr5	26691000	26692000	Chr5	26692000	26693000	2000	3.30103	94	6.88954e-09	3.23265e-05	26691000	26692000	26692000	26693000	94	1	AT5G66820,AT5G66830	AT5G66830,AT5G66840
Chr5	21723000	21724000	Chr5	21724000	21725000	2000	3.30103	75	1.59855e-05	0.0154844	21723000	21724000	21724000	21725000	75	1	AT5G53486,AT5G53487,AT5G53490	AT5G53490
Chr5	22763000	22764000	Chr5	22764000	22765000	2000	3.30103	34	3.38261e-05	0.0268208	22763000	22764000	22764000	22765000	34	1	AT5G56240	AT5G56240
Chr5	16575000	16576000	Chr5	16576000	16577000	2000	3.30103	31	1.66328e-08	6.71911e-05	16575000	16576000	16576000	16577000	31	1	AT5G41401	NA
Chr5	18945000	18946000	Chr5	18946000	18947000	2000	3.30103	60	1.57314e-09	9.11707e-06	18945000	18946000	18946000	18947000	60	1	AT5G46690	AT5G46690,AT5G46700
Chr5	25650000	25651000	Chr5	25651000	25652000	2000	3.30103	93	5.29954e-17	2.81539e-12	25650000	25651000	25651000	25652000	93	1	AT5G64100	AT5G64100
Chr5	16445000	16446000	Chr5	16446000	16447000	2000	3.30103	41	8.31001e-08	0.000248017	16445000	16446000	16446000	16447000	41	1	AT5G41090	AT5G41090,AT5G41100,AT5G41110,AT5G41109,AT5G41120
Chr5	3645000	3646000	Chr5	3646000	3647000	2000	3.30103	130	2.77157e-05	0.0231631	3645000	3646000	3646000	3647000	130	1	AT5G11390,AT5G11400,AT5G11410,AT5G11412,AT5G11416,AT5G11420	AT5G11420,AT5G11425,AT5G11430,AT5G11440,AT5G11450,AT5G11460
Chr5	7510000	7511000	Chr5	7511000	7512000	2000	3.30103	98	5.31612e-06	0.00660887	7510000	7511000	7511000	7512000	98	1	AT5G22600	AT5G22600
Chr5	559000	560000	Chr5	560000	561000	2000	3.30103	78	6.2946e-09	2.99762e-05	559000	560000	560000	561000	78	1	AT5G02490,AT5G02500,AT5G02502,AT5G02505	AT5G02510
Chr5	6994000	6995000	Chr5	6995000	6996000	2000	3.30103	68	4.03634e-05	0.0305409	6994000	6995000	6995000	6996000	68	1	AT5G20640,AT5G20650,AT5G20660,AT5G20670	NA
Chr5	25513000	25514000	Chr5	25514000	25515000	2000	3.30103	210	1.42087e-05	0.0141396	25513000	25514000	25514000	25515000	210	1	AT5G63740,AT5G63750	AT5G63750,AT5G63760,AT5G63770,AT5G63780
Chr5	22351000	22352000	Chr5	22352000	22353000	2000	3.30103	54	3.16265e-05	0.025532	22351000	22352000	22352000	22353000	54	1	AT5G55080	AT5G55080,AT5G55090
Chr5	23844000	23845000	Chr5	23845000	23846000	2000	3.30103	80	7.88094e-11	7.26027e-07	23844000	23845000	23845000	23846000	80	1	AT5G59055,AT5G59060	AT5G59070,AT5G59080
Chr5	17965000	17966000	Chr5	17966000	17967000	2000	3.30103	49	9.67105e-09	4.27873e-05	17965000	17966000	17966000	17967000	49	1	AT5G44569,AT5G44570	AT5G44570,AT5G44572,AT5G44574,AT5G44575
Chr5	8118000	8119000	Chr5	8119000	8120000	2000	3.30103	156	3.19496e-06	0.00445362	8118000	8119000	8119000	8120000	156	1	AT5G24010,AT5G24020,AT5G24030	AT5G24030
Chr5	8541000	8542000	Chr5	8542000	8543000	2000	3.30103	54	1.0487e-05	0.0112449	8541000	8542000	8542000	8543000	54	1	AT5G24840,AT5G24850,AT5G24860	AT5G24860
Chr5	4930000	4931000	Chr5	4931000	4932000	2000	3.30103	88	2.42443e-08	9.15624e-05	4930000	4931000	4931000	4932000	88	1	AT5G15175,AT5G15180	AT5G15180,AT5G15190,AT5G15200,AT5G15210
Chr5	25795000	25796000	Chr5	25796000	25797000	2000	3.30103	128	8.57112e-09	3.85988e-05	25795000	25796000	25796000	25797000	128	1	AT5G64510,AT5G64520,AT5G64530	AT5G64530
Chr5	21817000	21818000	Chr5	21818000	21819000	2000	3.30103	70	2.84164e-06	0.00408128	21817000	21818000	21818000	21819000	70	1	AT5G53740,AT5G53742,AT5G53750	AT5G53750
Chr5	22535000	22536000	Chr5	22536000	22537000	2000	3.30103	52	1.56902e-09	9.10426e-06	22535000	22536000	22536000	22537000	52	1	NA	AT5G55650,AT5G55660
Chr5	13919000	13920000	Chr5	13920000	13921000	2000	3.30103	27	8.5521e-06	0.00958438	13919000	13920000	13920000	13921000	27	1	NA	AT5G35753
Chr5	20874000	20875000	Chr5	20875000	20876000	2000	3.30103	60	2.7798e-05	0.0231994	20874000	20875000	20875000	20876000	60	1	AT5G51370	AT5G51380,AT5G51390,AT5G51400,AT5G51410
Chr5	16089000	16090000	Chr5	16090000	16091000	2000	3.30103	45	3.66626e-06	0.00494627	16089000	16090000	16090000	16091000	45	1	AT5G40220,AT5G40230,AT5G40240,AT5G40250,AT5G40260	AT5G40260,AT5G40270
Chr5	22988000	22989000	Chr5	22989000	22990000	2000	3.30103	57	6.36462e-07	0.00126795	22988000	22989000	22989000	22990000	57	1	AT5G56840,AT5G56850	AT5G56860
Chr5	18901000	18902000	Chr5	18902000	18903000	2000	3.30103	48	8.37751e-07	0.00156666	18901000	18902000	18902000	18903000	48	1	AT5G46570,AT5G46580	NA
Chr5	1674000	1675000	Chr5	1675000	1676000	2000	3.30103	51	5.36742e-12	7.0697e-08	1674000	1675000	1675000	1676000	51	1	AT5G05600	NA
Chr5	1830000	1831000	Chr5	1831000	1832000	2000	3.30103	63	2.27377e-10	1.8029e-06	1830000	1831000	1831000	1832000	63	1	AT5G06050,AT5G06060,AT5G06070,AT5G06080	AT5G06080
Chr5	20640000	20641000	Chr5	20641000	20642000	2000	3.30103	46	8.38797e-06	0.00944369	20640000	20641000	20641000	20642000	46	1	AT5G50717,AT5G50720,AT5G50740,AT5G50750	AT5G50750,AT5G50760,AT5G50770
Chr5	7863000	7864000	Chr5	7864000	7865000	2000	3.30103	124	3.81961e-07	0.000844534	7863000	7864000	7864000	7865000	124	1	AT5G23370	AT5G23370,AT5G23380
Chr5	8422000	8423000	Chr5	8423000	8424000	2000	3.30103	37	8.01907e-07	0.00151247	8422000	8423000	8423000	8424000	37	1	AT5G24600	AT5G24600,AT5G24610
Chr5	4949000	4950000	Chr5	4950000	4951000	2000	3.30103	142	1.83529e-08	7.28217e-05	4949000	4950000	4950000	4951000	142	1	AT5G15240	AT5G15240,AT5G15250
Chr5	1609000	1610000	Chr5	1610000	1611000	2000	3.30103	53	9.36771e-07	0.00171397	1609000	1610000	1610000	1611000	53	1	AT5G05440	AT5G05440,AT5G05450
Chr5	894000	895000	Chr5	895000	896000	2000	3.30103	56	3.98e-08	0.000137001	894000	895000	895000	896000	56	1	AT5G03540,AT5G03545	AT5G03545,AT5G03550,AT5G03552,AT5G03555
Chr5	5410000	5411000	Chr5	5411000	5412000	2000	3.30103	111	2.69957e-19	2.26444e-14	5410000	5411000	5411000	5412000	111	1	AT5G16560	AT5G16560
Chr5	19403000	19404000	Chr5	19404000	19405000	2000	3.30103	164	1.65218e-05	0.0158816	19403000	19404000	19404000	19405000	164	1	AT5G47900,AT5G47910,AT5G47920	AT5G47920
Chr5	4738000	4739000	Chr5	4739000	4740000	2000	3.30103	28	6.4562e-06	0.00767879	4738000	4739000	4739000	4740000	28	1	NA	AT5G14700,AT5G14710
Chr5	20956000	20957000	Chr5	20957000	20958000	2000	3.30103	166	2.50128e-05	0.0215521	20956000	20957000	20957000	20958000	166	1	AT5G51560,AT5G51570,AT5G51580,AT5G51590	AT5G51590,AT5G51600,AT5G51610,AT5G51620
Chr5	2619000	2620000	Chr5	2620000	2621000	2000	3.30103	42	9.61628e-09	4.26511e-05	2619000	2620000	2620000	2621000	42	1	AT5G08141	NA
Chr5	1046000	1047000	Chr5	1047000	1048000	2000	3.30103	56	1.5614e-05	0.0152045	1046000	1047000	1047000	1048000	56	1	NA	AT5G03890
Chr5	18905000	18906000	Chr5	18906000	18907000	2000	3.30103	39	2.53182e-07	0.000609532	18905000	18906000	18906000	18907000	39	1	AT5G46590	AT5G46590
Chr5	7484000	7485000	Chr5	7485000	7486000	2000	3.30103	106	2.11138e-05	0.0190516	7484000	7485000	7485000	7486000	106	1	AT5G22545,AT5G22550	AT5G22550
Chr5	19003000	19004000	Chr5	19004000	19005000	2000	3.30103	114	1.99019e-10	1.62383e-06	19003000	19004000	19004000	19005000	114	1	AT5G46830	AT5G46830,AT5G46840
Chr5	1269000	1270000	Chr5	1270000	1271000	2000	3.30103	33	8.67496e-06	0.00968415	1269000	1270000	1270000	1271000	33	1	NA	AT5G04480
Chr5	21124000	21125000	Chr5	21125000	21126000	2000	3.30103	41	7.70348e-06	0.00883482	21124000	21125000	21125000	21126000	41	1	AT5G51990,AT5G52000,AT5G52010,AT5G52020	AT5G52030,AT5G52040
Chr5	21822000	21823000	Chr5	21823000	21824000	2000	3.30103	115	2.5681e-06	0.0037839	21822000	21823000	21823000	21824000	115	1	AT5G53760	AT5G53760
Chr5	21423000	21424000	Chr5	21424000	21425000	2000	3.30103	33	1.30814e-07	0.000360077	21423000	21424000	21424000	21425000	33	1	AT5G52860	AT5G52870,AT5G52880,AT5G52882
Chr5	1087000	1088000	Chr5	1088000	1089000	2000	3.30103	33	3.62157e-06	0.00490112	1087000	1088000	1088000	1089000	33	1	AT5G03990,AT5G03995,AT5G04000,AT5G04010,AT5G04020	AT5G04030,AT5G04040,AT5G04045,AT5G04047,AT5G04050
Chr5	3112000	3113000	Chr5	3113000	3114000	2000	3.30103	335	1.03372e-28	3.9382e-23	3112000	3113000	3113000	3114000	335	1	AT5G09970	AT5G09970
Chr1	7331000	7332000	Chr1	7333000	7334000	3000	3.47712	101	1.14295e-09	6.97036e-06	7330000	7332000	7331000	7335000	372	0.625	AT1G20980,AT1G20990	NA
Chr1	28885000	28886000	Chr1	28887000	28888000	3000	3.47712	95	1.87105e-13	3.72748e-09	28885000	28887000	28886000	28888000	274	0.75	AT1G76890,AT1G76900	AT1G76910
Chr1	132000	133000	Chr1	134000	135000	3000	3.47712	264	7.11283e-12	8.94955e-08	132000	133000	133000	136000	561	1	AT1G01320,AT1G01340	AT1G01340
Chr1	29912000	29913000	Chr1	29914000	29915000	3000	3.47712	85	1.84879e-06	0.00293185	29912000	29914000	29913000	29915000	298	0.75	AT1G79490,AT1G79500,AT1G79510,AT1G79520	AT1G79520,AT1G79529,AT1G79530,AT1G79540,AT1G79550
Chr1	3132000	3133000	Chr1	3134000	3135000	3000	3.47712	68	1.29286e-05	0.0131773	3132000	3134000	3134000	3136000	184	0.5	AT1G09640,AT1G09645,AT1G09650,AT1G09660,AT1G09665	AT1G09680,AT1G09690,AT1G09700,AT1G09710,AT1G09720
Chr1	29579000	29580000	Chr1	29581000	29582000	3000	3.47712	107	2.34654e-08	8.93264e-05	29578000	29580000	29580000	29582000	197	0.5	AT1G78610,AT1G78620,AT1G78630,AT1G78640	AT1G78640,AT1G78650,AT1G78660,AT1G78670
Chr1	13061000	13062000	Chr1	13063000	13064000	3000	3.47712	18	4.39149e-05	0.0325583	13061000	13062000	13062000	13064000	92	1	AT1G35490	AT1G35490,AT1G35500,AT1G35501,AT1G35510
Chr1	1081000	1082000	Chr1	1083000	1084000	3000	3.47712	170	1.8739e-15	6.22194e-11	1081000	1083000	1083000	1084000	325	1	AT1G04120,AT1G04130,AT1G04140,AT1G04150	AT1G04150,AT1G04160
Chr1	27397000	27398000	Chr1	27399000	27400000	3000	3.47712	77	8.64986e-06	0.00966516	27397000	27398000	27398000	27400000	177	1	AT1G72760,AT1G72770,AT1G72780,AT1G72790,AT1G72800	AT1G72810,AT1G72820,AT1G72830,AT1G72840
Chr1	6917000	6918000	Chr1	6919000	6920000	3000	3.47712	264	1.05755e-07	0.000302238	6917000	6918000	6919000	6921000	399	1	AT1G19910,AT1G19920,AT1G19930	AT1G19940,AT1G19950,AT1G19960
Chr1	14159000	14160000	Chr1	14161000	14162000	3000	3.47712	48	1.00584e-08	4.42835e-05	14158000	14160000	14161000	14162000	83	1	AT1G37130	AT1G37130,AT1G37140
Chr1	28750000	28751000	Chr1	28752000	28753000	3000	3.47712	47	1.79591e-10	1.48559e-06	28750000	28752000	28752000	28753000	112	1	AT1G76590,AT1G76600,AT1G76610	AT1G76620,AT1G76630
Chr1	6740000	6741000	Chr1	6742000	6743000	3000	3.47712	63	9.05848e-07	0.00166788	6739000	6741000	6742000	6743000	149	1	AT1G19440,AT1G19450,AT1G19460,AT1G19464	AT1G19470,AT1G19480,AT1G19485,AT1G19490
Chr1	18119000	18120000	Chr1	18121000	18122000	3000	3.47712	200	2.46534e-12	3.57194e-08	18119000	18120000	18121000	18122000	200	1	AT1G48950,AT1G48953,AT1G48960,AT1G48970,AT1G48980	AT1G48990,AT1G49000,AT1G49005
Chr1	22077000	22078000	Chr1	22079000	22080000	3000	3.47712	55	2.62449e-05	0.0223328	22077000	22078000	22079000	22080000	55	1	NA	NA
Chr1	13221000	13222000	Chr1	13223000	13224000	3000	3.47712	97	7.67847e-07	0.00146033	13221000	13222000	13223000	13224000	97	1	AT1G35710	AT1G35710,AT1G35720,AT1G35730
Chr1	8849000	8850000	Chr1	8851000	8852000	3000	3.47712	60	3.42797e-07	0.000773844	8849000	8850000	8851000	8852000	60	1	AT1G25220,AT1G25230,AT1G25240,AT1G25250	AT1G25250
Chr1	240000	241000	Chr1	242000	243000	3000	3.47712	127	2.92945e-08	0.000106432	240000	241000	242000	243000	127	1	AT1G01630,AT1G01640,AT1G01650,AT1G01660	AT1G01660,AT1G01670
Chr1	8856000	8857000	Chr1	8858000	8859000	3000	3.47712	55	3.19959e-05	0.0257399	8856000	8857000	8858000	8859000	55	1	AT1G25260	AT1G25270,AT1G25275,AT1G25280,AT1G25290
Chr1	27747000	27748000	Chr1	27749000	27750000	3000	3.47712	28	1.21712e-05	0.0125906	27747000	27748000	27749000	27750000	28	1	AT1G73750,AT1G73760,AT1G73770,AT1G73780,AT1G73790,AT1G73805	AT1G73805,AT1G73810,AT1G73820,AT1G73830
Chr1	22599000	22600000	Chr1	22601000	22602000	3000	3.47712	65	1.96004e-07	0.00049716	22599000	22600000	22601000	22602000	65	1	AT1G61255,AT1G61260,AT1G61270	AT1G61270
Chr1	26990000	26991000	Chr1	26992000	26993000	3000	3.47712	160	3.69681e-06	0.00498179	26990000	26991000	26992000	26993000	160	1	AT1G71720,AT1G71730,AT1G71740,AT1G71750,AT1G71760,AT1G71770	AT1G71770,AT1G71780,AT1G71790,AT1G71800,AT1G71810
Chr1	24618000	24619000	Chr1	24620000	24621000	3000	3.47712	72	6.39616e-06	0.00761876	24618000	24619000	24620000	24621000	72	1	AT1G66110,AT1G66120,AT1G66130	AT1G66140,AT1G66145
Chr1	958000	959000	Chr1	960000	961000	3000	3.47712	98	7.28847e-05	0.0472644	958000	959000	960000	961000	98	1	AT1G03780,AT1G03790,AT1G03800,AT1G03810	AT1G03820,AT1G03830,AT1G03840
Chr1	11868000	11869000	Chr1	11870000	11871000	3000	3.47712	56	1.23925e-05	0.0127581	11868000	11869000	11870000	11871000	56	1	NA	AT1G32780
Chr1	480000	481000	Chr1	482000	483000	3000	3.47712	92	2.30702e-08	8.8385e-05	480000	481000	482000	483000	92	1	AT1G02350,AT1G02360,AT1G02370,AT1G02380,AT1G02390	AT1G02390,AT1G02391,AT1G02400
Chr1	7032000	7033000	Chr1	7034000	7035000	3000	3.47712	52	2.89669e-05	0.0239064	7032000	7033000	7034000	7035000	52	1	AT1G20310	AT1G20320
Chr1	24031000	24032000	Chr1	24033000	24034000	3000	3.47712	166	3.20194e-05	0.0257429	24031000	24032000	24033000	24034000	166	1	AT1G64628,AT1G64630,AT1G64640,AT1G64650,AT1G64660,AT1G64670	AT1G64670,AT1G64680,AT1G64690,AT1G64700
Chr1	29980000	29981000	Chr1	29982000	29983000	3000	3.47712	134	5.67319e-06	0.006948	29980000	29981000	29982000	29983000	134	1	AT1G79640,AT1G79650,AT1G79660,AT1G79670,AT1G79680	AT1G79680,AT1G79690,AT1G79700
Chr1	28328000	28329000	Chr1	28330000	28331000	3000	3.47712	102	8.12062e-06	0.00922033	28328000	28329000	28330000	28331000	102	1	AT1G75450,AT1G75460	AT1G75470,AT1G75490,AT1G75500
Chr1	17206000	17207000	Chr1	17208000	17209000	3000	3.47712	56	5.30673e-05	0.0374839	17206000	17207000	17208000	17209000	56	1	NA	NA
Chr1	2843000	2844000	Chr1	2845000	2846000	3000	3.47712	104	2.56304e-05	0.0219402	2843000	2844000	2845000	2846000	104	1	AT1G08840,AT1G08845,AT1G08860	AT1G08860,AT1G08870,AT1G08880,AT1G08890,AT1G08900
Chr1	22840000	22841000	Chr1	22842000	22843000	3000	3.47712	120	1.08341e-05	0.0115112	22840000	22841000	22842000	22843000	120	1	AT1G61820	AT1G61840
Chr1	18438000	18439000	Chr1	18440000	18441000	3000	3.47712	72	2.9372e-05	0.0241298	18438000	18439000	18440000	18441000	72	1	AT1G49800	AT1G49810,AT1G49820,AT1G49830,AT1G49832
Chr1	7891000	7892000	Chr1	7893000	7894000	3000	3.47712	68	8.11084e-07	0.00152623	7891000	7892000	7893000	7894000	68	1	AT1G22340	NA
Chr1	576000	577000	Chr1	578000	579000	3000	3.47712	90	1.80937e-05	0.0169988	576000	577000	578000	579000	90	1	AT1G02670	AT1G02670
Chr1	21933000	21934000	Chr1	21935000	21936000	3000	3.47712	145	2.82502e-06	0.00406474	21933000	21934000	21935000	21936000	145	1	AT1G59670,AT1G59675,AT1G59680	AT1G59690,AT1G59700
Chr1	4118000	4119000	Chr1	4120000	4121000	3000	3.47712	139	1.74211e-05	0.0165465	4118000	4119000	4120000	4121000	139	1	AT1G12130	AT1G12130,AT1G12140,AT1G12150,AT1G12160
Chr1	11963000	11964000	Chr1	11965000	11966000	3000	3.47712	167	8.76838e-08	0.000259591	11963000	11964000	11965000	11966000	167	1	AT1G33010,AT1G33020	AT1G33030,AT1G33040,AT1G33050,AT1G33055
Chr1	5283000	5284000	Chr1	5285000	5286000	3000	3.47712	84	4.29109e-05	0.0320025	5283000	5284000	5285000	5286000	84	1	AT1G15360	AT1G15370,AT1G15380,AT1G15385,AT1G15390,AT1G15400
Chr1	339000	340000	Chr1	341000	342000	3000	3.47712	113	2.28953e-05	0.0202269	339000	340000	341000	342000	113	1	AT1G01950,AT1G01960,AT1G01970	AT1G01980,AT1G01990,AT1G02000,AT1G02010
Chr1	503000	504000	Chr1	505000	506000	3000	3.47712	58	1.14822e-05	0.0120499	503000	504000	505000	506000	58	1	NA	AT1G02460,AT1G02470,AT1G02475,AT1G02480
Chr1	16132000	16133000	Chr1	16134000	16135000	3000	3.47712	25	3.63862e-06	0.00491724	16132000	16133000	16134000	16135000	25	1	AT1G42960,AT1G42970	AT1G42980,AT1G42990,AT1G43000
Chr1	23906000	23907000	Chr1	23908000	23909000	3000	3.47712	36	5.61164e-05	0.0390143	23906000	23907000	23908000	23909000	36	1	NA	AT1G64390
Chr1	4137000	4138000	Chr1	4139000	4140000	3000	3.47712	120	2.64481e-06	0.00387424	4137000	4138000	4139000	4140000	120	1	AT1G12170,AT1G12180,AT1G12190,AT1G12200	AT1G12200,AT1G12210,AT1G12211,AT1G12220,AT1G12230
Chr1	8417000	8418000	Chr1	8419000	8420000	3000	3.47712	61	1.52577e-05	0.0149179	8417000	8418000	8419000	8420000	61	1	AT1G23780,AT1G23790,AT1G23800,AT1G23810	AT1G23820,AT1G23830,AT1G23840,AT1G23850,AT1G23860
Chr1	20821000	20822000	Chr1	20823000	20824000	3000	3.47712	137	7.70723e-09	3.53649e-05	20821000	20822000	20823000	20824000	137	1	AT1G55700	AT1G55700,AT1G55710
Chr1	29425000	29426000	Chr1	29427000	29428000	3000	3.47712	41	6.52449e-05	0.0435567	29425000	29426000	29427000	29428000	41	1	AT1G78170,AT1G78172,AT1G78180,AT1G78190,AT1G78200,AT1G78206,AT1G78210,AT1G78220	AT1G78220,AT1G78230,AT1G78240
Chr1	9715000	9716000	Chr1	9717000	9718000	3000	3.47712	72	1.87854e-06	0.00296625	9715000	9716000	9717000	9718000	72	1	AT1G27890,AT1G27900	AT1G27900,AT1G27910,AT1G27920
Chr1	7726000	7727000	Chr1	7728000	7729000	3000	3.47712	48	7.09687e-05	0.0463361	7726000	7727000	7728000	7729000	48	1	AT1G21960	AT1G21970,AT1G21975
Chr1	19826000	19827000	Chr1	19828000	19829000	3000	3.47712	42	6.03905e-05	0.0411842	19826000	19827000	19828000	19829000	42	1	NA	NA
Chr1	21367000	21368000	Chr1	21369000	21370000	3000	3.47712	98	1.96882e-10	1.60913e-06	21367000	21368000	21369000	21370000	98	1	AT1G57680,AT1G57690	AT1G57700,AT1G57710,AT1G57720
Chr1	4420000	4421000	Chr1	4422000	4423000	3000	3.47712	137	5.82475e-13	1.0303e-08	4420000	4421000	4422000	4423000	137	1	AT1G12950	AT1G12950,AT1G12960,AT1G12970,AT1G12980
Chr1	22824000	22825000	Chr1	22826000	22827000	3000	3.47712	84	3.06392e-05	0.0249182	22824000	22825000	22826000	22827000	84	1	AT1G61780,AT1G61790,AT1G61795,AT1G61800	AT1G61800,AT1G61810
Chr1	7841000	7842000	Chr1	7843000	7844000	3000	3.47712	43	6.67986e-07	0.00131649	7841000	7842000	7843000	7844000	43	1	AT1G22190,AT1G22200,AT1G22210	AT1G22210,AT1G22220,AT1G22230,AT1G22240
Chr1	13471000	13472000	Chr1	13473000	13474000	3000	3.47712	39	3.36668e-06	0.00462291	13471000	13472000	13473000	13474000	39	1	AT1G36070	AT1G36078
Chr1	11562000	11563000	Chr1	11564000	11565000	3000	3.47712	101	1.0992e-08	4.75615e-05	11562000	11563000	11564000	11565000	101	1	AT1G32120,AT1G32130,AT1G32140	AT1G32140,AT1G32150,AT1G32160
Chr1	26462000	26463000	Chr1	26464000	26465000	3000	3.47712	62	3.4944e-05	0.0274892	26462000	26463000	26464000	26465000	62	1	NA	AT1G70270,AT1G70280
Chr1	26352000	26353000	Chr1	26354000	26355000	3000	3.47712	67	2.57832e-06	0.00379429	26352000	26353000	26354000	26355000	67	1	AT1G69935,AT1G69940,AT1G69960	AT1G69970
Chr1	1459000	1460000	Chr1	1461000	1462000	3000	3.47712	60	5.58567e-05	0.0388844	1459000	1460000	1461000	1462000	60	1	AT1G05055,AT1G05060,AT1G05065,AT1G05070,AT1G05080	AT1G05085,AT1G05090,AT1G05100,AT1G05120
Chr1	2631000	2632000	Chr1	2633000	2634000	3000	3.47712	180	7.80312e-08	0.000235833	2631000	2632000	2633000	2634000	180	1	AT1G08315,AT1G08320,AT1G08340	AT1G08350,AT1G08360,AT1G08370,AT1G08380,AT1G08390,AT1G08400
Chr1	11731000	11732000	Chr1	11733000	11734000	3000	3.47712	68	2.63054e-07	0.000627811	11731000	11732000	11733000	11734000	68	1	NA	NA
Chr1	28455000	28456000	Chr1	28457000	28458000	3000	3.47712	82	2.80445e-05	0.0233481	28455000	28456000	28457000	28458000	82	1	AT1G75760,AT1G75770,AT1G75780,AT1G75790	AT1G75790,AT1G75800,AT1G75810,AT1G75820
Chr1	28964000	28965000	Chr1	28966000	28967000	3000	3.47712	140	1.65343e-06	0.00267711	28964000	28965000	28966000	28967000	140	1	AT1G77080,AT1G77090,AT1G77093	AT1G77100,AT1G77110,AT1G77120
Chr1	17032000	17033000	Chr1	17034000	17035000	3000	3.47712	112	2.62898e-05	0.0223583	17032000	17033000	17034000	17035000	112	1	AT1G45050	AT1G45063
Chr1	18434000	18435000	Chr1	18436000	18437000	3000	3.47712	59	4.57073e-06	0.00587014	18434000	18435000	18436000	18437000	59	1	NA	AT1G49790
Chr1	28681000	28682000	Chr1	28683000	28684000	3000	3.47712	63	2.63343e-05	0.0223762	28681000	28682000	28683000	28684000	63	1	AT1G76420,AT1G76430	AT1G76440,AT1G76450,AT1G76460,AT1G76470,AT1G76480
Chr1	16760000	16761000	Chr1	16762000	16763000	3000	3.47712	42	6.33607e-06	0.00756225	16760000	16761000	16762000	16763000	42	1	AT1G44085,AT1G44090	AT1G44090,AT1G44094,AT1G44100
Chr1	8987000	8988000	Chr1	8989000	8990000	3000	3.47712	19	5.21052e-05	0.0369603	8987000	8988000	8989000	8990000	19	1	NA	NA
Chr1	27142000	27143000	Chr1	27144000	27145000	3000	3.47712	82	2.83419e-06	0.00407426	27142000	27143000	27144000	27145000	82	1	AT1G72140	AT1G72140,AT1G72141
Chr1	18742000	18743000	Chr1	18744000	18745000	3000	3.47712	58	3.70638e-05	0.0287354	18742000	18743000	18744000	18745000	58	1	AT1G50580,AT1G50590,AT1G50600,AT1G50603,AT1G50610	AT1G50610
Chr1	3244000	3245000	Chr1	3246000	3247000	3000	3.47712	81	4.57895e-05	0.0336042	3244000	3245000	3246000	3247000	81	1	AT1G09935,AT1G09940,AT1G09950,AT1G09960	AT1G09960
Chr1	27128000	27129000	Chr1	27130000	27131000	3000	3.47712	146	1.77918e-07	0.000458831	27128000	27129000	27130000	27131000	146	1	AT1G72060,AT1G72070,AT1G72080,AT1G72090,AT1G72100	AT1G72110
Chr1	30221000	30222000	Chr1	30223000	30224000	3000	3.47712	44	3.45826e-05	0.0272852	30221000	30222000	30223000	30224000	44	1	AT1G80370,AT1G80380,AT1G80390	AT1G80400,AT1G80410
Chr1	25993000	25994000	Chr1	25995000	25996000	3000	3.47712	42	8.44599e-08	0.000251291	25993000	25994000	25995000	25996000	42	1	AT1G69120,AT1G69130,AT1G69150	AT1G69150
Chr1	6701000	6702000	Chr1	6703000	6704000	3000	3.47712	62	2.5079e-05	0.0215897	6701000	6702000	6703000	6704000	62	1	AT1G19390	AT1G19390,AT1G19394,AT1G19396,AT1G19397,AT1G19400
Chr1	5393000	5394000	Chr1	5395000	5396000	3000	3.47712	144	2.50732e-08	9.40985e-05	5393000	5394000	5395000	5396000	144	1	AT1G15670,AT1G15680	AT1G15690,AT1G15700,AT1G15710
Chr1	19858000	19859000	Chr1	19860000	19861000	3000	3.47712	136	8.91114e-06	0.00987403	19858000	19859000	19860000	19861000	136	1	AT1G53220,AT1G53230,AT1G53233,AT1G53240,AT1G53250	AT1G53260,AT1G53265,AT1G53270,AT1G53280,AT1G53282,AT1G53285
Chr1	28921000	28922000	Chr1	28923000	28924000	3000	3.47712	80	3.01481e-06	0.00425586	28921000	28922000	28923000	28924000	80	1	AT1G76950,AT1G76952,AT1G76954,AT1G76955,AT1G76960,AT1G76965	AT1G76970,AT1G76980,AT1G76990
Chr1	12479000	12480000	Chr1	12481000	12482000	3000	3.47712	101	2.00226e-08	7.86633e-05	12479000	12480000	12481000	12482000	101	1	AT1G34245	AT1G34260
Chr1	12695000	12696000	Chr1	12697000	12698000	3000	3.47712	56	4.52238e-05	0.0333024	12695000	12696000	12697000	12698000	56	1	AT1G34650	AT1G34650
Chr1	16233000	16234000	Chr1	16235000	16236000	3000	3.47712	64	5.86882e-06	0.00712916	16233000	16234000	16235000	16236000	64	1	AT1G43130,AT1G43140	AT1G43140
Chr1	6962000	6963000	Chr1	6964000	6965000	3000	3.47712	93	8.82361e-06	0.00980887	6962000	6963000	6964000	6965000	93	1	AT1G20060,AT1G20065,AT1G20070,AT1G20080	AT1G20080,AT1G20090,AT1G20100,AT1G20110
Chr1	21534000	21535000	Chr1	21536000	21537000	3000	3.47712	80	3.42778e-06	0.00468528	21534000	21535000	21536000	21537000	80	1	AT1G58160	AT1G58170,AT1G58180,AT1G58190
Chr1	18813000	18814000	Chr1	18815000	18816000	3000	3.47712	91	7.77975e-06	0.00890519	18813000	18814000	18815000	18816000	91	1	AT1G50732,AT1G50740,AT1G50750	AT1G50760,AT1G50770,AT1G50780,AT1G50790
Chr1	13157000	13158000	Chr1	13159000	13160000	3000	3.47712	100	2.31287e-05	0.0203882	13157000	13158000	13159000	13160000	100	1	AT1G35617,AT1G35620	AT1G35625,AT1G35630
Chr1	10537000	10538000	Chr1	10539000	10540000	3000	3.47712	35	3.77429e-05	0.0291533	10537000	10538000	10539000	10540000	35	1	AT1G30040	AT1G30040
Chr1	10000	11000	Chr1	12000	13000	3000	3.47712	184	4.81291e-10	3.35448e-06	10000	11000	12000	13000	184	1	AT1G01010,AT1G01020	AT1G01030
Chr1	7915000	7916000	Chr1	7917000	7918000	3000	3.47712	84	4.30749e-07	0.000925685	7915000	7916000	7917000	7918000	84	1	AT1G22403,AT1G22410	AT1G22420,AT1G22430,AT1G22440,AT1G22450,AT1G22460
Chr1	21509000	21510000	Chr1	21511000	21512000	3000	3.47712	103	2.72098e-05	0.0228441	21509000	21510000	21511000	21512000	103	1	AT1G58070,AT1G58080	AT1G58090,AT1G58100,AT1G58110,AT1G58120,AT1G58122
Chr1	26520000	26521000	Chr1	26522000	26523000	3000	3.47712	24	3.61926e-06	0.00489939	26520000	26521000	26522000	26523000	24	1	NA	NA
Chr1	6680000	6681000	Chr1	6682000	6683000	3000	3.47712	47	1.9655e-06	0.00307513	6680000	6681000	6682000	6683000	47	1	AT1G19300,AT1G19310,AT1G19320,AT1G19330	AT1G19330,AT1G19340,AT1G19350,AT1G19360
Chr1	25883000	25884000	Chr1	25885000	25886000	3000	3.47712	49	4.26042e-05	0.0318135	25883000	25884000	25885000	25886000	49	1	AT1G68840,AT1G68845,AT1G68850	AT1G68850,AT1G68860,AT1G68862,AT1G68870,AT1G68872,AT1G68875,AT1G68880
Chr1	28293000	28294000	Chr1	28295000	28296000	3000	3.47712	44	6.46661e-05	0.0433033	28293000	28294000	28295000	28296000	44	1	AT1G75388,AT1G75390	AT1G75400,AT1G75410,AT1G75420
Chr2	13663000	13664000	Chr2	13665000	13666000	3000	3.47712	41	8.509e-07	0.00158797	13662000	13664000	13664000	13666000	112	0.75	AT2G32160	AT2G32160,AT2G32170,AT2G32179,AT2G32180,AT2G32190
Chr2	8098000	8099000	Chr2	8100000	8101000	3000	3.47712	99	5.98388e-10	4.06399e-06	8097000	8099000	8099000	8101000	262	0.75	AT2G18690	NA
Chr2	17713000	17714000	Chr2	17715000	17716000	3000	3.47712	147	1.70077e-07	0.000441878	17713000	17714000	17715000	17718000	298	1	AT2G42510,AT2G42520,AT2G42530,AT2G42540,AT2G42550	AT2G42560,AT2G42570
Chr2	10839000	10840000	Chr2	10841000	10842000	3000	3.47712	110	6.64298e-08	0.000207248	10838000	10840000	10840000	10842000	268	0.75	AT2G25460,AT2G25470	AT2G25470
Chr2	9619000	9620000	Chr2	9621000	9622000	3000	3.47712	64	3.84908e-07	0.000849652	9617000	9620000	9621000	9622000	165	1	AT2G22620,AT2G22630	AT2G22630,AT2G22640,AT2G22650,AT2G22660
Chr2	881000	882000	Chr2	883000	884000	3000	3.47712	83	3.24859e-08	0.000115913	881000	883000	883000	884000	201	1	AT2G03010	AT2G03020
Chr2	717000	718000	Chr2	719000	720000	3000	3.47712	117	2.70716e-07	0.000642443	717000	719000	719000	720000	232	1	AT2G02620	AT2G02620
Chr2	18991000	18992000	Chr2	18993000	18994000	3000	3.47712	30	4.36908e-06	0.00568427	18991000	18993000	18993000	18994000	68	1	AT2G46225,AT2G46230,AT2G46240,AT2G46250	AT2G46250
Chr2	8176000	8177000	Chr2	8178000	8179000	3000	3.47712	79	1.12074e-05	0.0118082	8176000	8178000	8178000	8179000	235	1	AT2G18870,AT2G18876,AT2G18880	AT2G18880,AT2G18890,AT2G18900
Chr2	3357000	3358000	Chr2	3359000	3360000	3000	3.47712	5	5.69169e-05	0.0393713	3356000	3358000	3359000	3360000	11	1	AT2G07798	AT2G07798
Chr2	17275000	17276000	Chr2	17277000	17278000	3000	3.47712	40	5.6814e-06	0.0069561	17275000	17276000	17276000	17278000	111	1	AT2G41440,AT2G41445	AT2G41445,AT2G41450,AT2G41451,AT2G41460
Chr2	3365000	3366000	Chr2	3367000	3368000	3000	3.47712	15	5.76078e-12	7.48473e-08	3365000	3367000	3367000	3368000	25	1	AT2G07667	AT2G07793
Chr2	10132000	10133000	Chr2	10134000	10135000	3000	3.47712	61	3.47531e-08	0.000122269	10131000	10133000	10134000	10135000	94	1	AT2G23800	AT2G23810
Chr2	648000	649000	Chr2	650000	651000	3000	3.47712	161	1.40595e-17	8.40279e-13	648000	649000	649000	651000	236	1	AT2G02450	AT2G02450
Chr2	15328000	15329000	Chr2	15330000	15331000	3000	3.47712	136	7.95269e-06	0.00906713	15327000	15329000	15330000	15331000	191	1	AT2G36500,AT2G36510,AT2G36520,AT2G36530,AT2G36540,AT2G36550	AT2G36560
Chr2	19160000	19161000	Chr2	19162000	19163000	3000	3.47712	19	1.95773e-05	0.0180281	19160000	19162000	19162000	19163000	45	1	NA	AT2G46670,AT2G46680
Chr2	11814000	11815000	Chr2	11816000	11817000	3000	3.47712	89	4.11737e-10	2.97825e-06	11813000	11815000	11815000	11817000	148	0.5	AT2G27700	AT2G27700,AT2G27710
Chr2	10040000	10041000	Chr2	10042000	10043000	3000	3.47712	64	2.52308e-05	0.0216891	10040000	10042000	10042000	10044000	102	0.5	NA	AT2G23600,AT2G23610
Chr2	12900000	12901000	Chr2	12902000	12903000	3000	3.47712	141	1.51327e-05	0.0148295	12899000	12901000	12902000	12903000	227	1	AT2G30230,AT2G30240	AT2G30240,AT2G30250,AT2G30260
Chr2	8545000	8546000	Chr2	8547000	8548000	3000	3.47712	43	7.53064e-09	3.45879e-05	8545000	8547000	8547000	8548000	74	1	NA	AT2G19810,AT2G19820,AT2G19830
Chr2	11822000	11823000	Chr2	11824000	11825000	3000	3.47712	73	2.4028e-12	3.50257e-08	11822000	11824000	11824000	11825000	155	1	AT2G27730,AT2G27740	AT2G27750,AT2G27760
Chr2	13010000	13011000	Chr2	13012000	13013000	3000	3.47712	104	1.38281e-07	0.000376513	13009000	13011000	13012000	13013000	204	1	AT2G30500,AT2G30505,AT2G30520,AT2G30530,AT2G30540	AT2G30550,AT2G30560,AT2G30570,AT2G30575
Chr2	11802000	11803000	Chr2	11804000	11805000	3000	3.47712	135	1.16437e-06	0.00204278	11801000	11803000	11803000	11805000	228	0.5	AT2G27670	AT2G27680
Chr2	12103000	12104000	Chr2	12105000	12106000	3000	3.47712	75	1.48466e-06	0.00246477	12103000	12104000	12105000	12107000	114	1	AT2G28320,AT2G28330,AT2G28340	AT2G28340
Chr2	9927000	9928000	Chr2	9929000	9930000	3000	3.47712	59	5.12591e-05	0.0365523	9927000	9928000	9929000	9930000	59	1	AT2G23320,AT2G23321	NA
Chr2	1931000	1932000	Chr2	1933000	1934000	3000	3.47712	120	6.32876e-08	0.000198814	1931000	1932000	1933000	1934000	120	1	AT2G05270,AT2G05294	AT2G05310
Chr2	16076000	16077000	Chr2	16078000	16079000	3000	3.47712	77	4.2767e-06	0.00558281	16076000	16077000	16078000	16079000	77	1	AT2G38340,AT2G38350,AT2G38360,AT2G38365,AT2G38370,AT2G38380	AT2G38380
Chr2	2957000	2958000	Chr2	2959000	2960000	3000	3.47712	29	2.2708e-05	0.0201061	2957000	2958000	2959000	2960000	29	1	AT2G07140	AT2G07140
Chr2	16858000	16859000	Chr2	16860000	16861000	3000	3.47712	82	1.95983e-06	0.00306926	16858000	16859000	16860000	16861000	82	1	AT2G40340,AT2G40350,AT2G40360,AT2G40370	AT2G40370
Chr2	236000	237000	Chr2	238000	239000	3000	3.47712	169	5.58355e-14	1.27126e-09	236000	237000	238000	239000	169	1	AT2G01500,AT2G01505,AT2G01510,AT2G01520	AT2G01530
Chr2	18462000	18463000	Chr2	18464000	18465000	3000	3.47712	54	2.47924e-05	0.0214511	18462000	18463000	18464000	18465000	54	1	AT2G44750,AT2G44760,AT2G44770,AT2G44790	AT2G44798,AT2G44800
Chr2	11136000	11137000	Chr2	11138000	11139000	3000	3.47712	131	6.27868e-07	0.00125554	11136000	11137000	11138000	11139000	131	1	AT2G26130,AT2G26135,AT2G26140,AT2G26150	AT2G26160,AT2G26170,AT2G26180,AT2G26190
Chr2	18529000	18530000	Chr2	18531000	18532000	3000	3.47712	54	2.01968e-06	0.00313797	18529000	18530000	18531000	18532000	54	1	AT2G44910,AT2G44920,AT2G44925,AT2G44930	AT2G44930
Chr2	7251000	7252000	Chr2	7253000	7254000	3000	3.47712	26	3.90139e-06	0.00520032	7251000	7252000	7253000	7254000	26	1	AT2G16710	AT2G16720
Chr2	4017000	4018000	Chr2	4019000	4020000	3000	3.47712	28	1.94259e-05	0.0179134	4017000	4018000	4019000	4020000	28	1	AT2G10440	NA
Chr2	9837000	9838000	Chr2	9839000	9840000	3000	3.47712	103	5.93917e-10	4.03936e-06	9837000	9838000	9839000	9840000	103	1	AT2G23093,AT2G23096,AT2G23100	AT2G23100,AT2G23110,AT2G23118,AT2G23120,AT2G23130
Chr2	11689000	11690000	Chr2	11691000	11692000	3000	3.47712	58	7.08086e-05	0.0462885	11689000	11690000	11691000	11692000	58	1	AT2G27290,AT2G27300,AT2G27310,AT2G27315	AT2G27320,AT2G27330,AT2G27340
Chr2	9800000	9801000	Chr2	9802000	9803000	3000	3.47712	38	5.10912e-05	0.0364543	9800000	9801000	9802000	9803000	38	1	AT2G22990,AT2G23000,AT2G23010	AT2G23010,AT2G23020,AT2G23030,AT2G23040,AT2G23050
Chr2	875000	876000	Chr2	877000	878000	3000	3.47712	47	2.88293e-06	0.00411464	875000	876000	877000	878000	47	1	AT2G03000	AT2G03000
Chr2	18845000	18846000	Chr2	18847000	18848000	3000	3.47712	76	6.15255e-06	0.00738542	18845000	18846000	18847000	18848000	76	1	AT2G45720,AT2G45730,AT2G45740,AT2G45750	AT2G45760,AT2G45770,AT2G45780,AT2G45790
Chr2	12183000	12184000	Chr2	12185000	12186000	3000	3.47712	37	5.40616e-06	0.00669471	12183000	12184000	12185000	12186000	37	1	NA	AT2G28500
Chr2	11756000	11757000	Chr2	11758000	11759000	3000	3.47712	88	1.91954e-08	7.57869e-05	11756000	11757000	11758000	11759000	88	1	AT2G27470,AT2G27480,AT2G27490,AT2G27500,AT2G27505	AT2G27510
Chr2	15173000	15174000	Chr2	15175000	15176000	3000	3.47712	162	2.35322e-05	0.0206305	15173000	15174000	15175000	15176000	162	1	AT2G36145,AT2G36140,AT2G36150,AT2G36160,AT2G36170,AT2G36180	AT2G36190,AT2G36200
Chr2	18246000	18247000	Chr2	18248000	18249000	3000	3.47712	89	4.68388e-07	0.000984823	18246000	18247000	18248000	18249000	89	1	AT2G44090,AT2G44100,AT2G44110	AT2G44110,AT2G44120,AT2G44140,AT2G44130,AT2G44150
Chr2	7998000	7999000	Chr2	8000000	8001000	3000	3.47712	146	6.09747e-13	1.06013e-08	7998000	7999000	8000000	8001000	146	1	AT2G18420,AT2G18440,AT2G18450	AT2G18450
Chr2	6245000	6246000	Chr2	6247000	6248000	3000	3.47712	139	1.2907e-06	0.00221985	6245000	6246000	6247000	6248000	139	1	AT2G14610,AT2G14620	AT2G14635
Chr2	18869000	18870000	Chr2	18871000	18872000	3000	3.47712	126	4.64343e-11	4.57762e-07	18869000	18870000	18871000	18872000	126	1	AT2G45800,AT2G45810,AT2G45820,AT2G45830,AT2G45840	AT2G45840,AT2G45850,AT2G45860,AT2G45870,AT2G45880
Chr2	17232000	17233000	Chr2	17234000	17235000	3000	3.47712	153	1.10067e-05	0.0116584	17232000	17233000	17234000	17235000	153	1	AT2G41310,AT2G41312,AT2G41330,AT2G41340,AT2G41342,AT2G41350	AT2G41360
Chr2	8855000	8856000	Chr2	8857000	8858000	3000	3.47712	59	4.09013e-07	0.000892967	8855000	8856000	8857000	8858000	59	1	AT2G20540,AT2G20550,AT2G20560,AT2G20562,AT2G20570	AT2G20570,AT2G20580,AT2G20585,AT2G20590
Chr2	19324000	19325000	Chr2	19326000	19327000	3000	3.47712	65	8.64373e-07	0.00160397	19324000	19325000	19326000	19327000	65	1	AT2G47000,AT2G47010,AT2G47020,AT2G47015,AT2G47030	AT2G47030
Chr2	999000	1000000	Chr2	1001000	1002000	3000	3.47712	52	1.20078e-05	0.0124512	999000	1000000	1001000	1002000	52	1	AT2G03280,AT2G03290	AT2G03300
Chr2	10020000	10021000	Chr2	10022000	10023000	3000	3.47712	75	2.78659e-07	0.000657297	10020000	10021000	10022000	10023000	75	1	AT2G23530	AT2G23530
Chr2	616000	617000	Chr2	618000	619000	3000	3.47712	61	1.12777e-06	0.00198944	616000	617000	618000	619000	61	1	AT2G02340	AT2G02350,AT2G02360,AT2G02370
Chr2	3396000	3397000	Chr2	3398000	3399000	3000	3.47712	11	1.55226e-05	0.0151368	3396000	3397000	3398000	3399000	11	1	NA	NA
Chr2	7857000	7858000	Chr2	7859000	7860000	3000	3.47712	76	8.13877e-07	0.00153022	7857000	7858000	7859000	7860000	76	1	AT2G18060,AT2G18070,AT2G18080	AT2G18080,AT2G18090
Chr2	15557000	15558000	Chr2	15559000	15560000	3000	3.47712	88	1.92095e-06	0.00302223	15557000	15558000	15559000	15560000	88	1	AT2G37030,AT2G37035,AT2G37040	AT2G37040,AT2G37050
Chr2	12303000	12304000	Chr2	12305000	12306000	3000	3.47712	46	4.86643e-05	0.0351635	12303000	12304000	12305000	12306000	46	1	AT2G28671,AT2G28670,AT2G28680	AT2G28690
Chr2	10947000	10948000	Chr2	10949000	10950000	3000	3.47712	102	1.82968e-05	0.0171429	10947000	10948000	10949000	10950000	102	1	AT2G25685,AT2G25690,AT2G25697	AT2G25700,AT2G25710,AT2G25720,AT2G25730
Chr2	13150000	13151000	Chr2	13152000	13153000	3000	3.47712	67	6.34592e-07	0.00126528	13150000	13151000	13152000	13153000	67	1	AT2G30880,AT2G30890,AT2G30900	AT2G30900,AT2G30910,AT2G30920
Chr2	723000	724000	Chr2	725000	726000	3000	3.47712	48	8.58731e-06	0.00961549	723000	724000	725000	726000	48	1	AT2G02630	AT2G02630
Chr2	2242000	2243000	Chr2	2244000	2245000	3000	3.47712	67	1.15417e-06	0.00202882	2242000	2243000	2244000	2245000	67	1	AT2G05830,AT2G05840,AT2G05850	AT2G05850
Chr2	128000	129000	Chr2	130000	131000	3000	3.47712	40	4.29349e-07	0.000923866	128000	129000	130000	131000	40	1	AT2G01200,AT2G01210,AT2G01220,AT2G01240	AT2G01250,AT2G01260,AT2G01270
Chr2	16526000	16527000	Chr2	16528000	16529000	3000	3.47712	91	5.96662e-05	0.0408359	16526000	16527000	16528000	16529000	91	1	AT2G39580,AT2G39590,AT2G39600,AT2G39610,AT2G39620,AT2G39630,AT2G39640	AT2G39650,AT2G39660
Chr2	16161000	16162000	Chr2	16163000	16164000	3000	3.47712	46	8.65772e-06	0.00967168	16161000	16162000	16163000	16164000	46	1	AT2G38620,AT2G38630,AT2G38640,AT2G38646,AT2G38650	AT2G38650,AT2G38660,AT2G38670
Chr2	12179000	12180000	Chr2	12181000	12182000	3000	3.47712	105	4.6827e-05	0.0341091	12179000	12180000	12181000	12182000	105	1	AT2G28470,AT2G28480,AT2G28490	AT2G28490
Chr2	10156000	10157000	Chr2	10158000	10159000	3000	3.47712	63	1.57452e-05	0.0152981	10156000	10157000	10158000	10159000	63	1	AT2G23840	NA
Chr2	3459000	3460000	Chr2	3461000	3462000	3000	3.47712	6	2.54854e-07	0.000612129	3459000	3460000	3461000	3462000	6	1	AT2G07725,AT2G07727,AT2G07757,AT2G07728,AT2G07820	AT2G07758
Chr2	1985000	1986000	Chr2	1987000	1988000	3000	3.47712	30	7.54602e-05	0.0484442	1985000	1986000	1987000	1988000	30	1	AT2G05400,AT2G05410,AT2G05420,AT2G05430	AT2G05430
Chr2	17000000	17001000	Chr2	17002000	17003000	3000	3.47712	113	2.03738e-05	0.0185866	17000000	17001000	17002000	17003000	113	1	AT2G40750	AT2G40750
Chr2	10130000	10131000	Chr2	10132000	10133000	3000	3.47712	85	3.84575e-06	0.00513906	10130000	10131000	10132000	10133000	85	1	AT2G23780,AT2G23790	AT2G23800
Chr2	15034000	15035000	Chr2	15036000	15037000	3000	3.47712	94	2.42486e-05	0.0210813	15034000	15035000	15036000	15037000	94	1	AT2G35765,AT2G35770	AT2G35770,AT2G35780,AT2G35790,AT2G35795,AT2G35800
Chr2	287000	288000	Chr2	289000	290000	3000	3.47712	38	1.01e-05	0.0108935	287000	288000	289000	290000	38	1	AT2G01640,AT2G01650	NA
Chr2	5935000	5936000	Chr2	5937000	5938000	3000	3.47712	106	9.30965e-07	0.00170413	5935000	5936000	5937000	5938000	106	1	AT2G14080,AT2G14095,AT2G14100	NA
Chr2	3667000	3668000	Chr2	3669000	3670000	3000	3.47712	57	6.16746e-07	0.00123796	3667000	3668000	3669000	3670000	57	1	NA	AT2G09795
Chr2	756000	757000	Chr2	758000	759000	3000	3.47712	67	3.28441e-06	0.00454305	756000	757000	758000	759000	67	1	AT2G02700	AT2G02710,AT2G02720,AT2G02730
Chr2	16631000	16632000	Chr2	16633000	16634000	3000	3.47712	286	1.72715e-05	0.0164468	16631000	16632000	16633000	16634000	286	1	AT2G39850	AT2G39850,AT2G39851,AT2G39855,AT2G39860
Chr2	18718000	18719000	Chr2	18720000	18721000	3000	3.47712	142	4.20793e-07	0.000913107	18718000	18719000	18720000	18721000	142	1	AT2G45403,AT2G45406,AT2G45410,AT2G45412,AT2G45420	AT2G45420
Chr2	17663000	17664000	Chr2	17665000	17666000	3000	3.47712	85	3.28335e-05	0.0262167	17663000	17664000	17665000	17666000	85	1	AT2G42410,AT2G42420,AT2G42425,AT2G42430	AT2G42430,AT2G42440,AT2G42450
Chr2	10457000	10458000	Chr2	10459000	10460000	3000	3.47712	207	7.11473e-05	0.0464211	10457000	10458000	10459000	10460000	207	1	AT2G24590,AT2G24592,AT2G24600,AT2G24610	AT2G24610
Chr2	17506000	17507000	Chr2	17508000	17509000	3000	3.47712	75	2.08021e-07	0.000521007	17506000	17507000	17508000	17509000	75	1	NA	AT2G41940
Chr2	1353000	1354000	Chr2	1355000	1356000	3000	3.47712	29	2.85884e-05	0.0236854	1353000	1354000	1355000	1356000	29	1	AT2G04060,AT2G04063,AT2G04066,AT2G04070	AT2G04070,AT2G04080,AT2G04090
Chr2	9739000	9740000	Chr2	9741000	9742000	3000	3.47712	62	2.43406e-05	0.0211405	9739000	9740000	9741000	9742000	62	1	AT2G22840,AT2G22850,AT2G22860,AT2G22870	AT2G22870,AT2G22880,AT2G22890
Chr2	16456000	16457000	Chr2	16458000	16459000	3000	3.47712	92	4.06403e-06	0.00536033	16456000	16457000	16458000	16459000	92	1	AT2G39380,AT2G39390,AT2G39400,AT2G39410	AT2G39410,AT2G39415,AT2G39420,AT2G39430,AT2G39435,AT2G39440
Chr2	17907000	17908000	Chr2	17909000	17910000	3000	3.47712	42	7.48434e-05	0.0481687	17907000	17908000	17909000	17910000	42	1	AT2G43040,AT2G43050	AT2G43060,AT2G43070
Chr2	11439000	11440000	Chr2	11441000	11442000	3000	3.47712	64	4.82115e-07	0.0010088	11439000	11440000	11441000	11442000	64	1	AT2G26800,AT2G26810,AT2G26820	AT2G26820,AT2G26830
Chr2	2013000	2014000	Chr2	2015000	2016000	3000	3.47712	37	5.14591e-05	0.0366676	2013000	2014000	2015000	2016000	37	1	NA	AT2G05500,AT2G05510
Chr2	8002000	8003000	Chr2	8004000	8005000	3000	3.47712	103	3.29098e-05	0.0262644	8002000	8003000	8004000	8005000	103	1	AT2G18460,AT2G18465	AT2G18465
Chr2	10433000	10434000	Chr2	10435000	10436000	3000	3.47712	35	2.9885e-05	0.0244458	10433000	10434000	10435000	10436000	35	1	AT2G24550,AT2G24560	NA
Chr3	23176000	23177000	Chr3	23178000	23179000	3000	3.47712	93	2.52535e-12	3.6386e-08	23176000	23179000	23178000	23182000	294	0.416667	AT3G62650,AT3G62660,AT3G62670	AT3G62670
Chr3	735000	736000	Chr3	737000	738000	3000	3.47712	67	4.04428e-08	0.000138669	733000	737000	736000	739000	239	0.333333	AT3G03140,AT3G03150,AT3G03160,AT3G03170,AT3G03180,AT3G03190	AT3G03200,AT3G03210,AT3G03220,AT3G03230
Chr3	6481000	6482000	Chr3	6483000	6484000	3000	3.47712	75	2.66787e-07	0.000634933	6480000	6482000	6482000	6484000	284	1	AT3G18790,AT3G18800,AT3G18810	AT3G18810,AT3G18815,AT3G18820
Chr3	19215000	19216000	Chr3	19217000	19218000	3000	3.47712	141	3.76699e-10	2.77519e-06	19214000	19216000	19215000	19218000	358	0.666667	AT3G51780,AT3G51790,AT3G51800,AT3G51810	AT3G51820,AT3G51830,AT3G51840
Chr3	17388000	17389000	Chr3	17390000	17391000	3000	3.47712	91	3.35257e-07	0.000760053	17388000	17389000	17390000	17393000	269	1	AT3G47210,AT3G47220	AT3G47220
Chr3	22532000	22533000	Chr3	22534000	22535000	3000	3.47712	49	6.84983e-09	3.22033e-05	22532000	22534000	22534000	22536000	193	0.75	AT3G60940,AT3G60950	NA
Chr3	22759000	22760000	Chr3	22761000	22762000	3000	3.47712	98	2.87115e-09	1.52594e-05	22759000	22762000	22761000	22763000	235	0.5	AT3G61480,AT3G61490	AT3G61500
Chr3	8116000	8117000	Chr3	8118000	8119000	3000	3.47712	125	1.72633e-12	2.62867e-08	8115000	8117000	8118000	8120000	260	0.75	AT3G22890,AT3G22900,AT3G22910	AT3G22910
Chr3	7469000	7470000	Chr3	7471000	7472000	3000	3.47712	104	2.04617e-06	0.00316816	7469000	7470000	7471000	7473000	191	1	AT3G21250,AT3G21260	NA
Chr3	8063000	8064000	Chr3	8065000	8066000	3000	3.47712	140	1.66242e-12	2.55577e-08	8063000	8064000	8064000	8066000	264	1	AT3G22790,AT3G22800	AT3G22810
Chr3	6541000	6542000	Chr3	6543000	6544000	3000	3.47712	98	2.17971e-10	1.74091e-06	6541000	6542000	6543000	6545000	140	1	AT3G18950,AT3G18952,AT3G18957	AT3G18960,AT3G18970,AT3G18980
Chr3	21721000	21722000	Chr3	21723000	21724000	3000	3.47712	180	1.876e-12	2.82954e-08	21721000	21723000	21723000	21724000	307	1	AT3G58690,AT3G58700,AT3G58710,AT3G58720,AT3G58730,AT3G58740	AT3G58740,AT3G58750,AT3G58760,AT3G58770
Chr3	20765000	20766000	Chr3	20767000	20768000	3000	3.47712	58	1.63033e-11	1.84845e-07	20765000	20767000	20767000	20768000	104	1	AT3G55960	AT3G55970
Chr3	16563000	16564000	Chr3	16565000	16566000	3000	3.47712	47	6.38227e-06	0.007606	16563000	16565000	16565000	16567000	100	0.5	AT3G45210	AT3G45220,AT3G45230,AT3G45240,AT3G45242,AT3G45243
Chr3	8288000	8289000	Chr3	8290000	8291000	3000	3.47712	31	1.10005e-05	0.0116544	8288000	8289000	8289000	8291000	67	1	AT3G23220	AT3G23230
Chr3	7778000	7779000	Chr3	7780000	7781000	3000	3.47712	146	1.02946e-05	0.0110758	7778000	7779000	7780000	7782000	241	1	AT3G22070,AT3G22072,AT3G22080	AT3G22080,AT3G22090,AT3G22100
Chr3	22618000	22619000	Chr3	22620000	22621000	3000	3.47712	62	6.83849e-07	0.00134278	22618000	22620000	22620000	22621000	141	1	AT3G61118,AT3G61120	AT3G61120,AT3G61130
Chr3	8214000	8215000	Chr3	8216000	8217000	3000	3.47712	39	2.99792e-07	0.000694805	8214000	8215000	8215000	8217000	94	1	AT3G23090	AT3G23090
Chr3	19434000	19435000	Chr3	19436000	19437000	3000	3.47712	85	4.14882e-08	0.000141286	19433000	19435000	19436000	19437000	144	1	AT3G52390,AT3G52400,AT3G52420,AT3G52430	AT3G52440
Chr3	4767000	4768000	Chr3	4769000	4770000	3000	3.47712	188	3.49046e-06	0.00475058	4767000	4768000	4769000	4771000	252	1	AT3G14280,AT3G14290,AT3G14300	AT3G14300,AT3G14310
Chr3	5109000	5110000	Chr3	5111000	5112000	3000	3.47712	106	1.98028e-09	1.11391e-05	5109000	5111000	5111000	5112000	242	1	AT3G15130,AT3G15140,AT3G15150,AT3G15160,AT3G15170	AT3G15170,AT3G15180,AT3G15190,AT3G15200,AT3G15210
Chr3	15655000	15656000	Chr3	15657000	15658000	3000	3.47712	49	7.17253e-07	0.0013915	15655000	15657000	15657000	15658000	104	1	AT3G43790	AT3G43790,AT3G43800
Chr3	22418000	22419000	Chr3	22420000	22421000	3000	3.47712	105	4.56531e-09	2.27138e-05	22418000	22420000	22420000	22421000	243	1	AT3G60630,AT3G60640,AT3G60647	AT3G60650,AT3G60660,AT3G60670
Chr3	9404000	9405000	Chr3	9406000	9407000	3000	3.47712	27	5.08103e-06	0.00637295	9404000	9405000	9405000	9407000	66	1	AT3G25750,AT3G25760	AT3G25770,AT3G25780
Chr3	23296000	23297000	Chr3	23298000	23299000	3000	3.47712	80	3.47376e-10	2.5911e-06	23295000	23297000	23298000	23299000	143	1	AT3G63030,AT3G63040	AT3G63050,AT3G63052,AT3G63060,AT3G63070
Chr3	8300000	8301000	Chr3	8302000	8303000	3000	3.47712	49	8.40339e-06	0.00945161	8300000	8302000	8302000	8303000	99	1	AT3G23240,AT3G23245	NA
Chr3	20731000	20732000	Chr3	20733000	20734000	3000	3.47712	115	1.44937e-08	6.03642e-05	20731000	20732000	20732000	20734000	286	1	AT3G55850,AT3G55860,AT3G55870	AT3G55870
Chr3	19530000	19531000	Chr3	19532000	19533000	3000	3.47712	136	7.14016e-09	3.32091e-05	19530000	19531000	19531000	19533000	273	1	AT3G52680,AT3G52690	AT3G52700,AT3G52710
Chr3	1845000	1846000	Chr3	1847000	1848000	3000	3.47712	97	2.87235e-09	1.52594e-05	1845000	1847000	1847000	1848000	213	1	AT3G06080,AT3G06090,AT3G06100,AT3G06105,AT3G06110	AT3G06120,AT3G06125,AT3G06130,AT3G06140
Chr3	19507000	19508000	Chr3	19509000	19510000	3000	3.47712	137	1.60974e-08	6.55027e-05	19507000	19509000	19509000	19510000	350	1	AT3G52580,AT3G52590,AT3G52600	AT3G52600,AT3G52605,AT3G52610,AT3G52620,AT3G52630,AT3G52640
Chr3	22124000	22125000	Chr3	22126000	22127000	3000	3.47712	103	5.13376e-07	0.00106167	22123000	22125000	22126000	22127000	156	1	AT3G59870,AT3G59880,AT3G59884,AT3G59890	AT3G59890,AT3G59900,AT3G59910,AT3G59920
Chr3	6404000	6405000	Chr3	6406000	6407000	3000	3.47712	72	1.53469e-06	0.00252939	6404000	6405000	6406000	6408000	108	1	AT3G18580,AT3G18590,AT3G18600,AT3G18610	AT3G18610,AT3G18620,AT3G18630,AT3G18640
Chr3	10188000	10189000	Chr3	10190000	10191000	3000	3.47712	180	3.30048e-11	3.44551e-07	10188000	10190000	10190000	10191000	398	1	AT3G27500,AT3G27503,AT3G27510	AT3G27510,AT3G27520,AT3G27530
Chr3	4341000	4342000	Chr3	4343000	4344000	3000	3.47712	22	2.87107e-05	0.0237614	4341000	4343000	4343000	4344000	67	1	AT3G13370	AT3G13380
Chr3	9542000	9543000	Chr3	9544000	9545000	3000	3.47712	57	2.81377e-06	0.00405466	9542000	9544000	9544000	9546000	149	0.5	AT3G26085,AT3G26090,AT3G26100,AT3G26110,AT3G26115	AT3G26115
Chr3	18830000	18831000	Chr3	18832000	18833000	3000	3.47712	109	2.29242e-10	1.81168e-06	18830000	18831000	18832000	18834000	169	1	AT3G50670,AT3G50674	AT3G50682,AT3G50685,AT3G50690,AT3G50695
Chr3	23016000	23017000	Chr3	23018000	23019000	3000	3.47712	132	3.51698e-06	0.00477988	23016000	23017000	23018000	23020000	201	1	AT3G62140,AT3G62150,AT3G62160,AT3G62170	AT3G62170,AT3G62180,AT3G62190
Chr3	23093000	23094000	Chr3	23095000	23096000	3000	3.47712	87	2.37625e-08	9.01705e-05	23093000	23095000	23095000	23096000	230	1	AT3G62370,AT3G62380,AT3G62390,AT3G62400,AT3G62410,AT3G62420,AT3G62422,AT3G62430	AT3G62430,AT3G62440
Chr3	573000	574000	Chr3	575000	576000	3000	3.47712	68	1.90493e-08	7.52725e-05	573000	574000	575000	576000	68	1	AT3G02645,AT3G02650,AT3G02660,AT3G02670	AT3G02680,AT3G02690,AT3G02700,AT3G02710
Chr3	8359000	8360000	Chr3	8361000	8362000	3000	3.47712	68	3.11681e-06	0.00437274	8359000	8360000	8361000	8362000	68	1	AT3G23330,AT3G23340,AT3G23350,AT3G23360,AT3G23370	NA
Chr3	10710000	10711000	Chr3	10712000	10713000	3000	3.47712	129	2.34787e-09	1.28294e-05	10710000	10711000	10712000	10713000	129	1	AT3G28560,AT3G28570	AT3G28580,AT3G28590,AT3G28600
Chr3	22161000	22162000	Chr3	22163000	22164000	3000	3.47712	135	1.42152e-06	0.00238229	22161000	22162000	22163000	22164000	135	1	AT3G59970,AT3G59980,AT3G59990,AT3G60000	AT3G60010,AT3G60020
Chr3	4729000	4730000	Chr3	4731000	4732000	3000	3.47712	34	2.44291e-07	0.000592758	4729000	4730000	4731000	4732000	34	1	AT3G14205,AT3G14210	AT3G14210,AT3G14220,AT3G14225,AT3G14230
Chr3	22631000	22632000	Chr3	22633000	22634000	3000	3.47712	124	1.1259e-13	2.37146e-09	22631000	22632000	22633000	22634000	124	1	AT3G61140,AT3G61150	AT3G61150,AT3G61160,AT3G61170,AT3G61172,AT3G61175
Chr3	17467000	17468000	Chr3	17469000	17470000	3000	3.47712	115	2.70564e-05	0.0227593	17467000	17468000	17469000	17470000	115	1	AT3G47400	AT3G47410,AT3G47420
Chr3	22379000	22380000	Chr3	22381000	22382000	3000	3.47712	40	1.05348e-05	0.011276	22379000	22380000	22381000	22382000	40	1	AT3G60550	NA
Chr3	10035000	10036000	Chr3	10037000	10038000	3000	3.47712	80	3.67667e-05	0.0285792	10035000	10036000	10037000	10038000	80	1	NA	AT3G27190,AT3G27200,AT3G27210
Chr3	18531000	18532000	Chr3	18533000	18534000	3000	3.47712	74	2.6801e-05	0.022648	18531000	18532000	18533000	18534000	74	1	AT3G49980	AT3G49990,AT3G50000,AT3G50010,AT3G50020,AT3G50022
Chr3	1959000	1960000	Chr3	1961000	1962000	3000	3.47712	124	1.33507e-06	0.00227557	1959000	1960000	1961000	1962000	124	1	AT3G06420,AT3G06430	NA
Chr3	7210000	7211000	Chr3	7212000	7213000	3000	3.47712	66	1.99544e-05	0.0183158	7210000	7211000	7212000	7213000	66	1	AT3G20620,AT3G20630,AT3G20640	AT3G20640
Chr3	9218000	9219000	Chr3	9220000	9221000	3000	3.47712	74	1.27962e-06	0.00220317	9218000	9219000	9220000	9221000	74	1	AT3G25280,AT3G25290,AT3G25400,AT3G25410,AT3G25420	AT3G25420,AT3G25430,AT3G25440
Chr3	2950000	2951000	Chr3	2952000	2953000	3000	3.47712	80	2.12651e-05	0.0191585	2950000	2951000	2952000	2953000	80	1	AT3G09620	AT3G09620,AT3G09630,AT3G09640,AT3G09650,AT3G09660
Chr3	16264000	16265000	Chr3	16266000	16267000	3000	3.47712	53	2.4053e-06	0.00359386	16264000	16265000	16266000	16267000	53	1	AT3G44713,AT3G44716	AT3G44718,AT3G44720
Chr3	1994000	1995000	Chr3	1996000	1997000	3000	3.47712	33	5.98529e-06	0.00724119	1994000	1995000	1996000	1997000	33	1	AT3G06480,AT3G06483	NA
Chr3	608000	609000	Chr3	610000	611000	3000	3.47712	56	1.56326e-06	0.00256939	608000	609000	610000	611000	56	1	AT3G02760,AT3G02770,AT3G02780,AT3G02790,AT3G02800,AT3G02810	AT3G02810,AT3G02820,AT3G02830,AT3G02832,AT3G02840,AT3G02850
Chr3	1109000	1110000	Chr3	1111000	1112000	3000	3.47712	128	1.70831e-05	0.0163063	1109000	1110000	1111000	1112000	128	1	AT3G04181,AT3G04184,AT3G04190,AT3G04200,AT3G04210,AT3G04220	AT3G04220,AT3G04230,AT3G04240
Chr3	4748000	4749000	Chr3	4750000	4751000	3000	3.47712	40	2.82989e-06	0.00407053	4748000	4749000	4750000	4751000	40	1	AT3G14240,AT3G14250,AT3G14260	AT3G14270
Chr3	1157000	1158000	Chr3	1159000	1160000	3000	3.47712	158	1.04458e-05	0.0112178	1157000	1158000	1159000	1160000	158	1	AT3G04350,AT3G04360	AT3G04370,AT3G04380,AT3G04390
Chr3	7313000	7314000	Chr3	7315000	7316000	3000	3.47712	122	3.37081e-05	0.0267675	7313000	7314000	7315000	7316000	122	1	AT3G20870,AT3G20880	AT3G20880,AT3G20885,AT3G20890,AT3G20898,AT3G20900
Chr3	22334000	22335000	Chr3	22336000	22337000	3000	3.47712	124	3.59516e-06	0.00487228	22334000	22335000	22336000	22337000	124	1	AT3G60410,AT3G60420	AT3G60420,AT3G60440,AT3G60450,AT3G60460
Chr3	10735000	10736000	Chr3	10737000	10738000	3000	3.47712	106	9.55166e-07	0.00173911	10735000	10736000	10737000	10738000	106	1	AT3G28610,AT3G28620,AT3G28630,AT3G28640,AT3G28650	AT3G28650,AT3G28660,AT3G28670,AT3G28674
Chr3	23182000	23183000	Chr3	23184000	23185000	3000	3.47712	42	2.30628e-05	0.0203506	23182000	23183000	23184000	23185000	42	1	AT3G62680	AT3G62690
Chr3	17206000	17207000	Chr3	17208000	17209000	3000	3.47712	160	2.89085e-05	0.0238885	17206000	17207000	17208000	17209000	160	1	AT3G46680,AT3G46690,AT3G46700,AT3G46710	AT3G46710,AT3G46720,AT3G46730,AT3G46740
Chr3	9365000	9366000	Chr3	9367000	9368000	3000	3.47712	46	7.37561e-05	0.0476357	9365000	9366000	9367000	9368000	46	1	NA	NA
Chr3	9414000	9415000	Chr3	9416000	9417000	3000	3.47712	59	5.88885e-06	0.00714441	9414000	9415000	9416000	9417000	59	1	AT3G25790	AT3G25795
Chr3	9925000	9926000	Chr3	9927000	9928000	3000	3.47712	61	7.084e-05	0.0462964	9925000	9926000	9927000	9928000	61	1	AT3G26910,AT3G26920,AT3G26922,AT3G26930	AT3G26930,AT3G26934,AT3G26932
Chr3	3183000	3184000	Chr3	3185000	3186000	3000	3.47712	67	6.55953e-07	0.00129921	3183000	3184000	3185000	3186000	67	1	AT3G10270,AT3G10280,AT3G10290	AT3G10290
Chr3	15605000	15606000	Chr3	15607000	15608000	3000	3.47712	52	1.61986e-05	0.0156518	15605000	15606000	15607000	15608000	52	1	AT3G43700,AT3G43710	AT3G43720
Chr3	19773000	19774000	Chr3	19775000	19776000	3000	3.47712	191	2.09748e-07	0.00052478	19773000	19774000	19775000	19776000	191	1	AT3G53305,AT3G53310,AT3G53320,AT3G53330	AT3G53340,AT3G53342,AT3G53350,AT3G53360
Chr3	9241000	9242000	Chr3	9243000	9244000	3000	3.47712	69	5.28583e-05	0.037386	9241000	9242000	9243000	9244000	69	1	AT3G25460,AT3G25470,AT3G25480,AT3G25490	AT3G25490,AT3G25500
Chr3	9363000	9364000	Chr3	9365000	9366000	3000	3.47712	43	7.78157e-05	0.0495679	9363000	9364000	9365000	9366000	43	1	AT3G25690,AT3G25700	NA
Chr3	10521000	10522000	Chr3	10523000	10524000	3000	3.47712	39	3.32129e-05	0.0264401	10521000	10522000	10523000	10524000	39	1	AT3G28200,AT3G28210	AT3G28216,AT3G28220
Chr3	1437000	1438000	Chr3	1439000	1440000	3000	3.47712	65	4.76988e-05	0.0345808	1437000	1438000	1439000	1440000	65	1	AT3G05120,AT3G05130,AT3G05140	NA
Chr3	18149000	18150000	Chr3	18151000	18152000	3000	3.47712	149	7.76913e-07	0.00147581	18149000	18150000	18151000	18152000	149	1	AT3G48920,AT3G48930,AT3G48940,AT3G48950	AT3G48960,AT3G48970,AT3G48980,AT3G48990
Chr3	10594000	10595000	Chr3	10596000	10597000	3000	3.47712	227	4.044e-06	0.00534423	10594000	10595000	10596000	10597000	227	1	AT3G28345	AT3G28345
Chr3	1440000	1441000	Chr3	1442000	1443000	3000	3.47712	57	2.71574e-12	3.88762e-08	1440000	1441000	1442000	1443000	57	1	AT3G05150	AT3G05150,AT3G05152
Chr3	3891000	3892000	Chr3	3893000	3894000	3000	3.47712	128	3.15656e-06	0.00441806	3891000	3892000	3893000	3894000	128	1	AT3G12190,AT3G12200,AT3G12203	AT3G12203,AT3G12210,AT3G12220,AT3G12230,AT3G12240
Chr3	8689000	8690000	Chr3	8691000	8692000	3000	3.47712	48	2.09704e-05	0.0189609	8689000	8690000	8691000	8692000	48	1	AT3G24050,AT3G24060	AT3G24065,AT3G24068,AT3G24070,AT3G24080,AT3G24090
Chr3	5681000	5682000	Chr3	5683000	5684000	3000	3.47712	92	3.47955e-05	0.027408	5681000	5682000	5683000	5684000	92	1	AT3G16670	AT3G16680,AT3G16690,AT3G16700,AT3G16710,AT3G16712,AT3G16720
Chr3	1500000	1501000	Chr3	1502000	1503000	3000	3.47712	106	1.45692e-05	0.0144132	1500000	1501000	1502000	1503000	106	1	AT3G05230,AT3G05240,AT3G05250,AT3G05260,AT3G05270	AT3G05270,AT3G05280,AT3G05290,AT3G05300,AT3G05310
Chr3	22653000	22654000	Chr3	22655000	22656000	3000	3.47712	67	8.00366e-07	0.00151017	22653000	22654000	22655000	22656000	67	1	AT3G61177,AT3G61180,AT3G61182,AT3G61190	AT3G61198,AT3G61200,AT3G61210,AT3G61220,AT3G61230
Chr3	8233000	8234000	Chr3	8235000	8236000	3000	3.47712	43	2.78048e-05	0.023201	8233000	8234000	8235000	8236000	43	1	NA	AT3G23125
Chr3	73000	74000	Chr3	75000	76000	3000	3.47712	134	2.48361e-05	0.0214675	73000	74000	75000	76000	134	1	AT3G01180,AT3G01185,AT3G01190,AT3G01200,AT3G01202,AT3G01210,AT3G01220	AT3G01220,AT3G01230,AT3G01240
Chr3	11782000	11783000	Chr3	11784000	11785000	3000	3.47712	63	9.41684e-06	0.0103172	11782000	11783000	11784000	11785000	63	1	NA	AT3G30160
Chr3	20434000	20435000	Chr3	20436000	20437000	3000	3.47712	144	1.1156e-05	0.0117695	20434000	20435000	20436000	20437000	144	1	AT3G55110,AT3G55120,AT3G55130	AT3G55130,AT3G55140,AT3G55150,AT3G55160
Chr3	6661000	6662000	Chr3	6663000	6664000	3000	3.47712	75	4.08019e-05	0.0307741	6661000	6662000	6663000	6664000	75	1	AT3G19210,AT3G19220,AT3G19230	AT3G19230,AT3G19235,AT3G19240,AT3G19250,AT3G19260,AT3G19270
Chr3	23197000	23198000	Chr3	23199000	23200000	3000	3.47712	231	8.36111e-06	0.0094254	23197000	23198000	23199000	23200000	231	1	AT3G62710	AT3G62710,AT3G62720,AT3G62730
Chr3	2389000	2390000	Chr3	2391000	2392000	3000	3.47712	115	1.87393e-08	7.41702e-05	2389000	2390000	2391000	2392000	115	1	AT3G07460,AT3G07470,AT3G07480	AT3G07490,AT3G07500,AT3G07510,AT3G07520,AT3G07522,AT3G07525,AT3G07530
Chr3	20617000	20618000	Chr3	20619000	20620000	3000	3.47712	145	1.60821e-05	0.0155653	20617000	20618000	20619000	20620000	145	1	AT3G55570,AT3G55573,AT3G55580,AT3G55590	AT3G55600,AT3G55605,AT3G55610
Chr3	22440000	22441000	Chr3	22442000	22443000	3000	3.47712	183	5.48663e-10	3.74757e-06	22440000	22441000	22442000	22443000	183	1	AT3G60680,AT3G60690,AT3G60700,AT3G60710	AT3G60720,AT3G60730,AT3G60740
Chr3	1128000	1129000	Chr3	1130000	1131000	3000	3.47712	71	1.35852e-07	0.000371379	1128000	1129000	1130000	1131000	71	1	AT3G04250,AT3G04260,AT3G04270	AT3G04280,AT3G04290
Chr3	9970000	9971000	Chr3	9972000	9973000	3000	3.47712	125	2.68513e-05	0.0226623	9970000	9971000	9972000	9973000	125	1	AT3G27020,AT3G27025	AT3G27027,AT3G27030,AT3G27040,AT3G27050,AT3G27060
Chr3	18025000	18026000	Chr3	18027000	18028000	3000	3.47712	164	9.70679e-10	6.12278e-06	18025000	18026000	18027000	18028000	164	1	NA	AT3G48660,AT3G48670
Chr3	1937000	1938000	Chr3	1939000	1940000	3000	3.47712	84	5.28798e-07	0.00108792	1937000	1938000	1939000	1940000	84	1	AT3G06350,AT3G06360,AT3G06370,AT3G06380	AT3G06390,AT3G06400,AT3G06410
Chr3	4434000	4435000	Chr3	4436000	4437000	3000	3.47712	94	3.19141e-05	0.0256971	4434000	4435000	4436000	4437000	94	1	AT3G13570,AT3G13580	AT3G13590,AT3G13594
Chr3	4088000	4089000	Chr3	4090000	4091000	3000	3.47712	58	1.8325e-05	0.0171595	4088000	4089000	4090000	4091000	58	1	AT3G12830,AT3G12835,AT3G12840,AT3G12850	AT3G12850,AT3G12860,AT3G12870,AT3G12880,AT3G12890
Chr3	13490000	13491000	Chr3	13492000	13493000	3000	3.47712	41	4.42664e-07	0.000946129	13490000	13491000	13492000	13493000	41	1	AT3G32920,AT3G32930,AT3G32940	AT3G32940,AT3G32960
Chr3	4527000	4528000	Chr3	4529000	4530000	3000	3.47712	90	2.54783e-08	9.50962e-05	4527000	4528000	4529000	4530000	90	1	AT3G13780,AT3G13782	AT3G13784
Chr3	10539000	10540000	Chr3	10541000	10542000	3000	3.47712	84	6.64492e-08	0.000207248	10539000	10540000	10541000	10542000	84	1	AT3G28270	AT3G28280,AT3G28290,AT3G28291
Chr3	7511000	7512000	Chr3	7513000	7514000	3000	3.47712	62	5.66562e-05	0.0392616	7511000	7512000	7513000	7514000	62	1	AT3G21320,AT3G21330,AT3G21338,AT3G21340	AT3G21340,AT3G21350,AT3G21351,AT3G21352,AT3G21360
Chr3	502000	503000	Chr3	504000	505000	3000	3.47712	72	7.50429e-05	0.0482451	502000	503000	504000	505000	72	1	AT3G02440,AT3G02450	AT3G02450,AT3G02460,AT3G02470,AT3G02468
Chr3	17994000	17995000	Chr3	17996000	17997000	3000	3.47712	93	4.74233e-07	0.000994924	17994000	17995000	17996000	17997000	93	1	AT3G48550	NA
Chr3	18427000	18428000	Chr3	18429000	18430000	3000	3.47712	87	5.75473e-06	0.00702268	18427000	18428000	18429000	18430000	87	1	AT3G49690	AT3G49690
Chr3	17368000	17369000	Chr3	17370000	17371000	3000	3.47712	101	7.52072e-05	0.0483248	17368000	17369000	17370000	17371000	101	1	AT3G47170	AT3G47170
Chr3	19470000	19471000	Chr3	19472000	19473000	3000	3.47712	40	1.24446e-05	0.0127931	19470000	19471000	19472000	19473000	40	1	AT3G52510	AT3G52520
Chr3	8194000	8195000	Chr3	8196000	8197000	3000	3.47712	71	9.44408e-08	0.000275837	8194000	8195000	8196000	8197000	71	1	AT3G23050	AT3G23050
Chr3	19992000	19993000	Chr3	19994000	19995000	3000	3.47712	50	3.84592e-05	0.029549	19992000	19993000	19994000	19995000	50	1	NA	AT3G54000,AT3G54010
Chr3	10962000	10963000	Chr3	10964000	10965000	3000	3.47712	65	8.62246e-06	0.0096413	10962000	10963000	10964000	10965000	65	1	NA	NA
Chr3	21263000	21264000	Chr3	21265000	21266000	3000	3.47712	77	2.18827e-14	5.42109e-10	21263000	21264000	21265000	21266000	77	1	AT3G57420,AT3G57430,AT3G57440,AT3G57450,AT3G57460	AT3G57460
Chr3	19479000	19480000	Chr3	19481000	19482000	3000	3.47712	105	3.0221e-05	0.0246452	19479000	19480000	19481000	19482000	105	1	NA	NA
Chr3	9686000	9687000	Chr3	9688000	9689000	3000	3.47712	142	5.10345e-08	0.000167704	9686000	9687000	9688000	9689000	142	1	AT3G26470	AT3G26480
Chr3	21973000	21974000	Chr3	21975000	21976000	3000	3.47712	77	6.33249e-05	0.0426777	21973000	21974000	21975000	21976000	77	1	AT3G59450	NA
Chr3	18850000	18851000	Chr3	18852000	18853000	3000	3.47712	73	1.60151e-06	0.00261518	18850000	18851000	18852000	18853000	73	1	NA	AT3G50730
Chr3	15948000	15949000	Chr3	15950000	15951000	3000	3.47712	169	1.3069e-09	7.82054e-06	15948000	15949000	15950000	15951000	169	1	AT3G44250	AT3G44250,AT3G44260,AT3G44261
Chr3	8454000	8455000	Chr3	8456000	8457000	3000	3.47712	36	4.81243e-05	0.0348275	8454000	8455000	8456000	8457000	36	1	AT3G23540,AT3G23550,AT3G23560	AT3G23560
Chr3	22929000	22930000	Chr3	22931000	22932000	3000	3.47712	46	9.24542e-06	0.010162	22929000	22930000	22931000	22932000	46	1	AT3G61910	AT3G61920
Chr3	5629000	5630000	Chr3	5631000	5632000	3000	3.47712	75	2.58049e-08	9.58972e-05	5629000	5630000	5631000	5632000	75	1	AT3G16530,AT3G16540,AT3G16550	AT3G16550,AT3G16552,AT3G16555
Chr3	9661000	9662000	Chr3	9663000	9664000	3000	3.47712	88	3.18986e-07	0.000730895	9661000	9662000	9663000	9664000	88	1	AT3G26340,AT3G26350,AT3G26360,AT3G26370,AT3G26380	AT3G26380,AT3G26390,AT3G26400,AT3G26410,AT3G26430,AT3G26420
Chr3	9160000	9161000	Chr3	9162000	9163000	3000	3.47712	97	4.6549e-05	0.0339747	9160000	9161000	9162000	9163000	97	1	AT3G25120,AT3G25130,AT3G25140,AT3G25150,AT3G25160	AT3G25160,AT3G25165
Chr3	15204000	15205000	Chr3	15206000	15207000	3000	3.47712	22	1.9983e-06	0.0031135	15204000	15205000	15206000	15207000	22	1	AT3G43210,AT3G43220	AT3G43230
Chr3	3542000	3543000	Chr3	3544000	3545000	3000	3.47712	147	5.467e-06	0.00674558	3542000	3543000	3544000	3545000	147	1	AT3G11310	AT3G11310,AT3G11320,AT3G11325
Chr3	21507000	21508000	Chr3	21509000	21510000	3000	3.47712	60	1.60673e-06	0.00261834	21507000	21508000	21509000	21510000	60	1	AT3G58070	AT3G58080,AT3G58090
Chr3	5562000	5563000	Chr3	5564000	5565000	3000	3.47712	102	1.62921e-06	0.00264774	5562000	5563000	5564000	5565000	102	1	AT3G16360,AT3G16370,AT3G16380,AT3G16390	AT3G16390,AT3G16400
Chr3	4465000	4466000	Chr3	4467000	4468000	3000	3.47712	185	2.36979e-05	0.0207311	4465000	4466000	4467000	4468000	185	1	AT3G13660	AT3G13662,AT3G13670,AT3G13672,AT3G13674,AT3G13677,AT3G13680
Chr3	8221000	8222000	Chr3	8223000	8224000	3000	3.47712	148	4.487e-08	0.000150869	8221000	8222000	8223000	8224000	148	1	AT3G23100	AT3G23100,AT3G23110,AT3G23120
Chr3	8867000	8868000	Chr3	8869000	8870000	3000	3.47712	54	1.34135e-06	0.00227975	8867000	8868000	8869000	8870000	54	1	NA	AT3G24430,AT3G24440
Chr3	11311000	11312000	Chr3	11313000	11314000	3000	3.47712	178	2.19955e-05	0.0196133	11311000	11312000	11313000	11314000	178	1	AT3G29430	AT3G29431
Chr3	9898000	9899000	Chr3	9900000	9901000	3000	3.47712	120	5.31882e-10	3.64859e-06	9898000	9899000	9900000	9901000	120	1	AT3G26840,AT3G26850,AT3G26855	AT3G26860,AT3G26870,AT3G26880,AT3G26890
Chr3	12663000	12664000	Chr3	12665000	12666000	3000	3.47712	81	1.15557e-05	0.0120958	12663000	12664000	12665000	12666000	81	1	NA	AT3G31051,AT3G31068
Chr3	15741000	15742000	Chr3	15743000	15744000	3000	3.47712	90	4.99626e-07	0.00103818	15741000	15742000	15743000	15744000	90	1	AT3G43880,AT3G43890	AT3G43890,AT3G43900,AT3G43910,AT3G43920
Chr3	13061000	13062000	Chr3	13063000	13064000	3000	3.47712	28	1.14784e-05	0.0120485	13061000	13062000	13063000	13064000	28	1	AT3G32047	AT3G32050,AT3G32052
Chr3	7406000	7407000	Chr3	7408000	7409000	3000	3.47712	137	8.81849e-06	0.00980546	7406000	7407000	7408000	7409000	137	1	AT3G21100,AT3G21110,AT3G21120	AT3G21130,AT3G21140,AT3G21150,AT3G21160
Chr3	4828000	4829000	Chr3	4830000	4831000	3000	3.47712	32	3.87738e-05	0.0297048	4828000	4829000	4830000	4831000	32	1	NA	AT3G14440
Chr3	7705000	7706000	Chr3	7707000	7708000	3000	3.47712	72	8.11311e-09	3.68221e-05	7705000	7706000	7707000	7708000	72	1	AT3G21870	AT3G21880,AT3G21890
Chr3	5472000	5473000	Chr3	5474000	5475000	3000	3.47712	54	7.27393e-06	0.00844241	5472000	5473000	5474000	5475000	54	1	AT3G16150	AT3G16160,AT3G16170,AT3G16175,AT3G16180
Chr3	499000	500000	Chr3	501000	502000	3000	3.47712	146	6.62945e-07	0.00130818	499000	500000	501000	502000	146	1	AT3G02390,AT3G02400,AT3G02410,AT3G02420,AT3G02430	AT3G02440
Chr3	19986000	19987000	Chr3	19988000	19989000	3000	3.47712	135	1.5599e-08	6.38553e-05	19986000	19987000	19988000	19989000	135	1	AT3G53950,AT3G53960,AT3G53965,AT3G53970	AT3G53980,AT3G53990
Chr3	17357000	17358000	Chr3	17359000	17360000	3000	3.47712	108	6.21168e-05	0.0420794	17357000	17358000	17359000	17360000	108	1	AT3G47140	AT3G47150,AT3G47160
Chr3	18437000	18438000	Chr3	18439000	18440000	3000	3.47712	59	2.75769e-05	0.0230713	18437000	18438000	18439000	18440000	59	1	AT3G49710	AT3G49710,AT3G49720,AT3G49725
Chr3	16082000	16083000	Chr3	16084000	16085000	3000	3.47712	27	4.79259e-05	0.0347138	16082000	16083000	16084000	16085000	27	1	NA	AT3G44480
Chr3	18868000	18869000	Chr3	18870000	18871000	3000	3.47712	104	1.94537e-09	1.09945e-05	18868000	18869000	18870000	18871000	104	1	AT3G50760	AT3G50764,AT3G50770,AT3G50780,AT3G50790
Chr3	11747000	11748000	Chr3	11749000	11750000	3000	3.47712	39	2.02623e-05	0.0185061	11747000	11748000	11749000	11750000	39	1	AT3G29830,AT3G29970	NA
Chr3	3496000	3497000	Chr3	3498000	3499000	3000	3.47712	99	8.27011e-06	0.00934788	3496000	3497000	3498000	3499000	99	1	AT3G11130,AT3G11150,AT3G11160	AT3G11165,AT3G11170,AT3G11180,AT3G11200
Chr3	2255000	2256000	Chr3	2257000	2258000	3000	3.47712	163	5.13922e-05	0.0366308	2255000	2256000	2257000	2258000	163	1	AT3G07100,AT3G07110,AT3G07115,AT3G07120,AT3G07130	AT3G07130,AT3G07140,AT3G07150,AT3G07160
Chr3	5817000	5818000	Chr3	5819000	5820000	3000	3.47712	47	4.41752e-06	0.00573044	5817000	5818000	5819000	5820000	47	1	AT3G17060	AT3G17070
Chr3	18907000	18908000	Chr3	18909000	18910000	3000	3.47712	76	1.4875e-08	6.18446e-05	18907000	18908000	18909000	18910000	76	1	AT3G50840,AT3G50845,AT3G50850,AT3G50860	AT3G50870
Chr4	140000	141000	Chr4	142000	143000	3000	3.47712	142	2.00509e-09	1.12522e-05	137000	141000	140000	144000	848	0.625	AT4G00320	AT4G00330,AT4G00335
Chr4	61000	62000	Chr4	63000	64000	3000	3.47712	69	5.16889e-10	3.55594e-06	61000	65000	62000	67000	532	0.5	NA	AT4G00160
Chr4	5765000	5766000	Chr4	5767000	5768000	3000	3.47712	89	1.01288e-07	0.000291914	5764000	5766000	5766000	5772000	302	0.5	AT4G08980,AT4G08990	AT4G08990
Chr4	18548000	18549000	Chr4	18550000	18551000	3000	3.47712	51	5.97643e-13	1.04707e-08	18547000	18550000	18548000	18551000	252	0.666667	AT4G39970,AT4G39980,AT4G39985,AT4G39986,AT4G39990,AT4G40000,AT4G40010	AT4G40010,AT4G40011,AT4G40020,AT4G40030,AT4G40040,AT4G40042,AT4G40045,AT4G40050
Chr4	10642000	10643000	Chr4	10644000	10645000	3000	3.47712	66	6.79129e-09	3.19595e-05	10641000	10645000	10642000	10646000	377	0.3125	AT4G19510,AT4G19520	AT4G19520
Chr4	9560000	9561000	Chr4	9562000	9563000	3000	3.47712	94	2.68368e-11	2.85777e-07	9560000	9564000	9562000	9565000	330	0.416667	AT4G16960,AT4G16970,AT4G16980,AT4G16990	AT4G16990
Chr4	15564000	15565000	Chr4	15566000	15567000	3000	3.47712	180	1.42806e-15	5.05771e-11	15563000	15566000	15564000	15567000	707	0.555556	NA	AT4G32230,AT4G32240,AT4G32250
Chr4	17740000	17741000	Chr4	17742000	17743000	3000	3.47712	67	2.28824e-15	7.24546e-11	17739000	17742000	17740000	17743000	316	0.555556	AT4G37750	AT4G37750
Chr4	18447000	18448000	Chr4	18449000	18450000	3000	3.47712	72	5.15941e-10	3.55453e-06	18445000	18448000	18448000	18451000	212	0.555556	NA	AT4G39770
Chr4	17385000	17386000	Chr4	17387000	17388000	3000	3.47712	14	8.09932e-07	0.00152521	17383000	17386000	17385000	17388000	95	0.444444	NA	NA
Chr4	247000	248000	Chr4	249000	250000	3000	3.47712	71	9.51811e-09	4.22942e-05	247000	249000	248000	251000	220	0.666667	AT4G00570	AT4G00580
Chr4	81000	82000	Chr4	83000	84000	3000	3.47712	57	1.00441e-11	1.18576e-07	80000	82000	81000	85000	249	0.5	AT4G00190	AT4G00200
Chr4	995000	996000	Chr4	997000	998000	3000	3.47712	94	1.67034e-11	1.87538e-07	995000	998000	997000	999000	313	0.666667	AT4G02280	AT4G02280
Chr4	15864000	15865000	Chr4	15866000	15867000	3000	3.47712	150	8.86339e-18	5.57607e-13	15863000	15865000	15866000	15868000	342	1	AT4G32880	AT4G32880
Chr4	569000	570000	Chr4	571000	572000	3000	3.47712	198	1.64644e-17	9.71858e-13	567000	570000	570000	572000	462	0.666667	AT4G01360,AT4G01370,AT4G01380	AT4G01390,AT4G01400
Chr4	9975000	9976000	Chr4	9977000	9978000	3000	3.47712	141	8.60404e-16	3.37198e-11	9974000	9977000	9977000	9978000	300	1	AT4G17960,AT4G17970	AT4G17970,AT4G17975,AT4G17980
Chr4	5614000	5615000	Chr4	5616000	5617000	3000	3.47712	65	1.19752e-11	1.39991e-07	5614000	5615000	5615000	5618000	197	1	AT4G08790,AT4G08800	AT4G08810
Chr4	378000	379000	Chr4	380000	381000	3000	3.47712	115	4.72594e-14	1.09159e-09	377000	379000	379000	381000	210	0.75	NA	AT4G00893,AT4G00895
Chr4	17535000	17536000	Chr4	17537000	17538000	3000	3.47712	27	4.05928e-08	0.000139029	17534000	17536000	17535000	17538000	85	0.5	NA	NA
Chr4	362000	363000	Chr4	364000	365000	3000	3.47712	121	4.30907e-10	3.08887e-06	361000	363000	362000	365000	358	0.5	AT4G00830,AT4G00840,AT4G00850,AT4G00860,AT4G00870	AT4G00872
Chr4	15279000	15280000	Chr4	15281000	15282000	3000	3.47712	95	2.21966e-11	2.43412e-07	15278000	15281000	15281000	15282000	224	1	AT4G31490,AT4G31500,AT4G31510,AT4G31520	AT4G31520,AT4G31530
Chr4	18581000	18582000	Chr4	18583000	18584000	3000	3.47712	24	1.47633e-12	2.31433e-08	18580000	18582000	18581000	18584000	60	0.5	AT4G40060,AT4G40065,AT4G40070,AT4G40085,AT4G40080,AT4G40090	AT4G40100
Chr4	16094000	16095000	Chr4	16096000	16097000	3000	3.47712	141	5.50485e-09	2.66129e-05	16093000	16096000	16096000	16097000	326	1	AT4G33420,AT4G33430,AT4G33440	AT4G33450
Chr4	10516000	10517000	Chr4	10518000	10519000	3000	3.47712	32	1.55194e-06	0.00255273	10514000	10517000	10516000	10519000	97	0.333333	NA	NA
Chr4	1399000	1400000	Chr4	1401000	1402000	3000	3.47712	121	1.80207e-05	0.0169543	1398000	1400000	1400000	1402000	312	0.75	AT4G03130,AT4G03135,AT4G03140,AT4G03150,AT4G03153,AT4G03156,AT4G03160,AT4G03165	AT4G03170,AT4G03175,AT4G03180,AT4G03190,AT4G03200
Chr4	2666000	2667000	Chr4	2668000	2669000	3000	3.47712	51	1.6452e-06	0.00266648	2665000	2667000	2668000	2670000	137	0.75	AT4G05160	AT4G05170
Chr4	17321000	17322000	Chr4	17323000	17324000	3000	3.47712	58	1.05505e-08	4.61526e-05	17320000	17322000	17322000	17324000	126	0.75	NA	NA
Chr4	7671000	7672000	Chr4	7673000	7674000	3000	3.47712	72	1.08019e-08	4.70371e-05	7670000	7672000	7672000	7674000	265	0.75	AT4G13200,AT4G13210	AT4G13210
Chr4	17166000	17167000	Chr4	17168000	17169000	3000	3.47712	149	5.11434e-10	3.53367e-06	17165000	17167000	17168000	17169000	222	1	AT4G36268,AT4G36270,AT4G36280	AT4G36280,AT4G36290
Chr4	16445000	16446000	Chr4	16447000	16448000	3000	3.47712	69	4.51438e-08	0.000151363	16445000	16446000	16446000	16448000	112	1	AT4G34390,AT4G34400	AT4G34400
Chr4	691000	692000	Chr4	693000	694000	3000	3.47712	81	1.94501e-08	7.6666e-05	691000	692000	692000	694000	136	1	AT4G01570,AT4G01575,AT4G01580,AT4G01590,AT4G01593,AT4G01595	AT4G01600,AT4G01610
Chr4	115000	116000	Chr4	117000	118000	3000	3.47712	101	3.76306e-11	3.83629e-07	115000	116000	117000	119000	155	1	AT4G00260	AT4G00260,AT4G00270
Chr4	18168000	18169000	Chr4	18170000	18171000	3000	3.47712	210	4.974e-15	1.46802e-10	18168000	18169000	18169000	18171000	324	1	AT4G38950,AT4G38960,AT4G38970,AT4G38980	AT4G38990
Chr4	10684000	10685000	Chr4	10686000	10687000	3000	3.47712	97	6.20308e-06	0.00743136	10683000	10685000	10686000	10687000	152	1	AT4G19630	NA
Chr4	17189000	17190000	Chr4	17191000	17192000	3000	3.47712	32	1.18701e-08	5.05831e-05	17189000	17190000	17191000	17193000	52	1	AT4G36380	AT4G36380,AT4G36390,AT4G36400,AT4G36410
Chr4	2763000	2764000	Chr4	2765000	2766000	3000	3.47712	111	1.61556e-08	6.56278e-05	2763000	2765000	2765000	2766000	220	1	AT4G05430,AT4G05440,AT4G05450,AT4G05460,AT4G05470	AT4G05470,AT4G05475
Chr4	837000	838000	Chr4	839000	840000	3000	3.47712	108	1.43017e-07	0.000385459	837000	839000	839000	841000	194	0.5	AT4G01925	AT4G01930,AT4G01935
Chr4	17145000	17146000	Chr4	17147000	17148000	3000	3.47712	40	1.87081e-06	0.00295878	17145000	17146000	17147000	17149000	68	1	AT4G36230	AT4G36240,AT4G36245,AT4G36250,AT4G36260
Chr4	16455000	16456000	Chr4	16457000	16458000	3000	3.47712	24	1.23351e-05	0.0127188	16455000	16456000	16456000	16458000	85	1	NA	AT4G34419,AT4G34420,AT4G34430,AT4G34440
Chr4	13856000	13857000	Chr4	13858000	13859000	3000	3.47712	59	9.97519e-09	4.39576e-05	13856000	13858000	13858000	13859000	146	1	AT4G27760,AT4G27765,AT4G27780,AT4G27790,AT4G27800,AT4G27810	AT4G27820
Chr4	8016000	8017000	Chr4	8018000	8019000	3000	3.47712	87	1.86433e-06	0.00295063	8015000	8017000	8018000	8019000	134	1	AT4G13840	AT4G13850,AT4G13860,AT4G13870,AT4G13880,AT4G13885
Chr4	15549000	15550000	Chr4	15551000	15552000	3000	3.47712	27	3.72139e-05	0.0288285	15548000	15550000	15550000	15552000	71	0.5	AT4G32180,AT4G32190,AT4G32200	AT4G32200
Chr4	1537000	1538000	Chr4	1539000	1540000	3000	3.47712	129	4.65593e-05	0.0339762	1536000	1538000	1539000	1540000	179	1	AT4G03455,AT4G03460	AT4G03460
Chr4	667000	668000	Chr4	669000	670000	3000	3.47712	106	1.55846e-08	6.38553e-05	666000	668000	668000	670000	186	0.5	AT4G01533	AT4G01533,AT4G01535,AT4G01540,AT4G01550,AT4G01560
Chr4	14731000	14732000	Chr4	14733000	14734000	3000	3.47712	53	4.65045e-06	0.00594837	14730000	14732000	14733000	14734000	96	1	AT4G30110,AT4G30120	AT4G30120
Chr4	10570000	10571000	Chr4	10572000	10573000	3000	3.47712	42	1.10677e-06	0.00195773	10569000	10571000	10572000	10573000	93	1	AT4G19380	AT4G19380,AT4G19390,AT4G19395,AT4G19400,AT4G19410
Chr4	18133000	18134000	Chr4	18135000	18136000	3000	3.47712	218	2.464e-09	1.33269e-05	18133000	18135000	18135000	18136000	416	1	AT4G38870	AT4G38880,AT4G38890,AT4G38900,AT4G38910
Chr4	8380000	8381000	Chr4	8382000	8383000	3000	3.47712	76	1.71031e-06	0.00275243	8379000	8381000	8382000	8383000	156	1	AT4G14605	AT4G14615
Chr4	308000	309000	Chr4	310000	311000	3000	3.47712	60	1.8274e-06	0.00290372	308000	310000	310000	311000	111	1	AT4G00740	AT4G00740,AT4G00750,AT4G00752
Chr4	17775000	17776000	Chr4	17777000	17778000	3000	3.47712	85	1.44779e-10	1.22953e-06	17775000	17777000	17777000	17778000	144	1	AT4G37800	AT4G37800
Chr4	554000	555000	Chr4	556000	557000	3000	3.47712	84	2.0189e-12	3.00712e-08	554000	555000	555000	557000	130	1	AT4G01310,AT4G01320,AT4G01328,AT4G01330,AT4G01335,AT4G01340	AT4G01340
Chr4	9999000	10000000	Chr4	10001000	10002000	3000	3.47712	47	7.15813e-09	3.32305e-05	9999000	10001000	10001000	10002000	97	1	NA	NA
Chr4	14193000	14194000	Chr4	14195000	14196000	3000	3.47712	94	2.43766e-06	0.00362297	14192000	14194000	14195000	14196000	146	1	AT4G28720	NA
Chr4	15614000	15615000	Chr4	15616000	15617000	3000	3.47712	28	2.3795e-07	0.00058046	15614000	15616000	15616000	15617000	60	1	AT4G32320,AT4G32330,AT4G32340	AT4G32342
Chr4	7331000	7332000	Chr4	7333000	7334000	3000	3.47712	43	2.33899e-05	0.0205538	7331000	7333000	7333000	7334000	168	1	AT4G12370	AT4G12380,AT4G12382,AT4G12390,AT4G12400,AT4G12405,AT4G12410
Chr4	8241000	8242000	Chr4	8243000	8244000	3000	3.47712	92	4.79105e-10	3.34413e-06	8241000	8243000	8243000	8244000	177	1	AT4G14300,AT4G14301,AT4G14305,AT4G14310,AT4G14315,AT4G14320	AT4G14320,AT4G14330,AT4G14340,AT4G14342
Chr4	6811000	6812000	Chr4	6813000	6814000	3000	3.47712	74	3.40408e-08	0.000120383	6811000	6812000	6813000	6815000	121	1	AT4G11170	AT4G11170
Chr4	368000	369000	Chr4	370000	371000	3000	3.47712	32	3.15142e-08	0.000113036	368000	370000	370000	371000	78	1	AT4G00880	AT4G00885
Chr4	13377000	13378000	Chr4	13379000	13380000	3000	3.47712	42	2.41357e-05	0.0210046	13376000	13378000	13378000	13380000	95	0.5	AT4G26455,AT4G26466,AT4G26460,AT4G26470,AT4G26480,AT4G26483,AT4G26485	AT4G26488,AT4G26490,AT4G26500,AT4G26510,AT4G26520
Chr4	1587000	1588000	Chr4	1589000	1590000	3000	3.47712	62	3.58735e-07	0.000802998	1587000	1588000	1589000	1591000	120	1	AT4G03560,AT4G03565	AT4G03566
Chr4	16516000	16517000	Chr4	16518000	16519000	3000	3.47712	40	7.97273e-07	0.00150611	16515000	16517000	16517000	16519000	110	0.5	AT4G34560,AT4G34570,AT4G34580	AT4G34580
Chr4	9640000	9641000	Chr4	9642000	9643000	3000	3.47712	129	6.40819e-07	0.0012761	9639000	9641000	9642000	9644000	181	0.5	AT4G17140,AT4G17150	AT4G17160,AT4G17170,AT4G17180,AT4G17190,AT4G17200,AT4G17210
Chr4	10173000	10174000	Chr4	10175000	10176000	3000	3.47712	39	2.28412e-06	0.00345382	10173000	10174000	10175000	10177000	77	1	NA	NA
Chr4	394000	395000	Chr4	396000	397000	3000	3.47712	88	4.96897e-13	9.03344e-09	394000	395000	395000	397000	175	1	AT4G00920	AT4G00930
Chr4	16522000	16523000	Chr4	16524000	16525000	3000	3.47712	44	2.54056e-05	0.0218081	16522000	16524000	16524000	16526000	77	0.5	AT4G34588,AT4G34590	NA
Chr4	2440000	2441000	Chr4	2442000	2443000	3000	3.47712	41	4.12061e-06	0.00542	2440000	2442000	2442000	2443000	95	1	AT4G04775,AT4G04780,AT4G04790,AT4G04800	AT4G04810
Chr4	5631000	5632000	Chr4	5633000	5634000	3000	3.47712	91	3.45892e-08	0.000121872	5631000	5632000	5632000	5634000	167	1	AT4G08840	AT4G08840
Chr4	2449000	2450000	Chr4	2451000	2452000	3000	3.47712	36	3.29047e-08	0.000117258	2448000	2450000	2451000	2452000	64	1	AT4G04840	AT4G04840,AT4G04850,AT4G04860,AT4G04870
Chr4	17252000	17253000	Chr4	17254000	17255000	3000	3.47712	138	3.94884e-16	1.70094e-11	17252000	17253000	17254000	17256000	213	1	AT4G36540,AT4G36550,AT4G36560	AT4G36570,AT4G36580
Chr4	17652000	17653000	Chr4	17654000	17655000	3000	3.47712	32	2.93294e-05	0.0240989	17651000	17653000	17654000	17655000	50	1	NA	NA
Chr4	2218000	2219000	Chr4	2220000	2221000	3000	3.47712	58	2.52634e-05	0.0217094	2218000	2219000	2220000	2221000	58	1	AT4G04450	AT4G04450,AT4G04460,AT4G04470
Chr4	816000	817000	Chr4	818000	819000	3000	3.47712	101	4.33178e-09	2.17556e-05	816000	817000	818000	819000	101	1	AT4G01860,AT4G01865,AT4G01870,AT4G01880,AT4G01883,AT4G01890	AT4G01890,AT4G01895,AT4G01897,AT4G01900
Chr4	489000	490000	Chr4	491000	492000	3000	3.47712	115	1.39715e-15	5.02265e-11	489000	490000	491000	492000	115	1	NA	AT4G01140,AT4G01150
Chr4	11140000	11141000	Chr4	11142000	11143000	3000	3.47712	147	2.56898e-07	0.000616615	11140000	11141000	11142000	11143000	147	1	AT4G20800	AT4G20810
Chr4	11737000	11738000	Chr4	11739000	11740000	3000	3.47712	115	1.48151e-05	0.0145991	11737000	11738000	11739000	11740000	115	1	AT4G22170	AT4G22180,AT4G22190,AT4G22200
Chr4	10332000	10333000	Chr4	10334000	10335000	3000	3.47712	161	4.85404e-10	3.37823e-06	10332000	10333000	10334000	10335000	161	1	AT4G18820	AT4G18820,AT4G18823,AT4G18830,AT4G18840,AT4G18850
Chr4	16650000	16651000	Chr4	16652000	16653000	3000	3.47712	44	9.65862e-06	0.0105171	16650000	16651000	16652000	16653000	44	1	AT4G34940,AT4G34950,AT4G34960	NA
Chr4	15413000	15414000	Chr4	15415000	15416000	3000	3.47712	71	9.77428e-13	1.61707e-08	15413000	15414000	15415000	15416000	71	1	AT4G31860,AT4G31870,AT4G31875,AT4G31877	AT4G31877,AT4G31880
Chr4	5464000	5465000	Chr4	5466000	5467000	3000	3.47712	100	3.11883e-06	0.0043739	5464000	5465000	5466000	5467000	100	1	AT4G08580,AT4G08590	AT4G08590
Chr4	5995000	5996000	Chr4	5997000	5998000	3000	3.47712	27	1.74987e-05	0.0166037	5995000	5996000	5997000	5998000	27	1	NA	AT4G09462,AT4G09464,AT4G09465
Chr4	6897000	6898000	Chr4	6899000	6900000	3000	3.47712	101	1.00367e-10	8.94432e-07	6897000	6898000	6899000	6900000	101	1	AT4G11330,AT4G11340	AT4G11340,AT4G11350,AT4G11355,AT4G11360,AT4G11370
Chr4	6544000	6545000	Chr4	6546000	6547000	3000	3.47712	60	4.62989e-05	0.033864	6544000	6545000	6546000	6547000	60	1	AT4G10590	AT4G10595,AT4G10596
Chr4	17299000	17300000	Chr4	17301000	17302000	3000	3.47712	50	5.77546e-05	0.039836	17299000	17300000	17301000	17302000	50	1	AT4G36690,AT4G36700	AT4G36710
Chr4	17465000	17466000	Chr4	17467000	17468000	3000	3.47712	50	2.01456e-05	0.0184253	17465000	17466000	17467000	17468000	50	1	AT4G37070	AT4G37070
Chr4	16197000	16198000	Chr4	16199000	16200000	3000	3.47712	31	7.77015e-05	0.049515	16197000	16198000	16199000	16200000	31	1	AT4G33760,AT4G33770	NA
Chr4	12097000	12098000	Chr4	12099000	12100000	3000	3.47712	47	3.75644e-06	0.00504225	12097000	12098000	12099000	12100000	47	1	AT4G23080	NA
Chr4	1244000	1245000	Chr4	1246000	1247000	3000	3.47712	45	3.25423e-07	0.000741273	1244000	1245000	1246000	1247000	45	1	AT4G02780	AT4G02790
Chr4	73000	74000	Chr4	75000	76000	3000	3.47712	35	5.01692e-06	0.00631741	73000	74000	75000	76000	35	1	AT4G00180	AT4G00180
Chr4	15581000	15582000	Chr4	15583000	15584000	3000	3.47712	61	2.06894e-06	0.00319307	15581000	15582000	15583000	15584000	61	1	AT4G32260,AT4G32270,AT4G32265,AT4G32272	AT4G32280
Chr4	8501000	8502000	Chr4	8503000	8504000	3000	3.47712	74	7.03794e-05	0.0461188	8501000	8502000	8503000	8504000	74	1	AT4G14780,AT4G14785,AT4G14790,AT4G14800	AT4G14805,AT4G14811,AT4G14810,AT4G14815,AT4G14819,AT4G14820,AT4G14830,AT4G14840,AT4G14850
Chr4	9528000	9529000	Chr4	9530000	9531000	3000	3.47712	150	1.21258e-05	0.012549	9528000	9529000	9530000	9531000	150	1	NA	AT4G16930,AT4G16940,AT4G16950
Chr4	7324000	7325000	Chr4	7326000	7327000	3000	3.47712	51	6.80289e-05	0.0450254	7324000	7325000	7326000	7327000	51	1	AT4G12320,AT4G12330,AT4G12334,AT4G12340,AT4G12350	AT4G12350,AT4G12360
Chr4	12416000	12417000	Chr4	12418000	12419000	3000	3.47712	22	2.97234e-06	0.00420957	12416000	12417000	12418000	12419000	22	1	AT4G23880	AT4G23882,AT4G23885,AT4G23890,AT4G23895
Chr4	17799000	17800000	Chr4	17801000	17802000	3000	3.47712	60	4.25421e-06	0.00556165	17799000	17800000	17801000	17802000	60	1	NA	AT4G37860
Chr4	7638000	7639000	Chr4	7640000	7641000	3000	3.47712	49	4.08224e-08	0.000139502	7638000	7639000	7640000	7641000	49	1	AT4G13100	AT4G13110
Chr4	16366000	16367000	Chr4	16368000	16369000	3000	3.47712	48	4.58064e-08	0.000153048	16366000	16367000	16368000	16369000	48	1	NA	AT4G34170
Chr4	14044000	14045000	Chr4	14046000	14047000	3000	3.47712	57	1.52141e-05	0.0148849	14044000	14045000	14046000	14047000	57	1	AT4G28380,AT4G28390,AT4G28395	AT4G28397,AT4G28400
Chr4	1032000	1033000	Chr4	1034000	1035000	3000	3.47712	59	6.62621e-05	0.0441248	1032000	1033000	1034000	1035000	59	1	AT4G02330	AT4G02330,AT4G02340,AT4G02350,AT4G02360,AT4G02370
Chr4	16591000	16592000	Chr4	16593000	16594000	3000	3.47712	45	1.25652e-06	0.00217279	16591000	16592000	16593000	16594000	45	1	AT4G34770	AT4G34780,AT4G34790
Chr4	6336000	6337000	Chr4	6338000	6339000	3000	3.47712	83	2.16628e-05	0.0194071	6336000	6337000	6338000	6339000	83	1	AT4G10150,AT4G10160	NA
Chr4	18170000	18171000	Chr4	18172000	18173000	3000	3.47712	105	2.87833e-06	0.00411258	18170000	18171000	18172000	18173000	105	1	AT4G38990	AT4G39000
Chr4	11761000	11762000	Chr4	11763000	11764000	3000	3.47712	63	8.16801e-06	0.00926533	11761000	11762000	11763000	11764000	63	1	AT4G22210,AT4G22212,AT4G22214,AT4G22217,AT4G22220,AT4G22230	AT4G22233,AT4G22235,AT4G22240,AT4G22250,AT4G22260,AT4G22270
Chr4	16368000	16369000	Chr4	16370000	16371000	3000	3.47712	69	6.99589e-06	0.00817205	16368000	16369000	16370000	16371000	69	1	AT4G34170	AT4G34180,AT4G34190
Chr4	6096000	6097000	Chr4	6098000	6099000	3000	3.47712	36	2.97165e-05	0.0243626	6096000	6097000	6098000	6099000	36	1	AT4G09640,AT4G09647	AT4G09649,AT4G09650,AT4G09660,AT4G09670
Chr4	17139000	17140000	Chr4	17141000	17142000	3000	3.47712	30	7.94168e-07	0.00150143	17139000	17140000	17141000	17142000	30	1	AT4G36220	NA
Chr4	15075000	15076000	Chr4	15077000	15078000	3000	3.47712	115	9.20394e-06	0.0101257	15075000	15076000	15077000	15078000	115	1	AT4G30972,AT4G30975	AT4G30975,AT4G30980,AT4G30990
Chr4	630000	631000	Chr4	632000	633000	3000	3.47712	84	2.65056e-06	0.00388148	630000	631000	632000	633000	84	1	NA	NA
Chr4	10405000	10406000	Chr4	10407000	10408000	3000	3.47712	60	1.52603e-05	0.0149179	10405000	10406000	10407000	10408000	60	1	AT4G18980,AT4G18990,AT4G19000	AT4G19000,AT4G19003,AT4G19006,AT4G19010
Chr4	9788000	9789000	Chr4	9790000	9791000	3000	3.47712	46	2.42785e-05	0.0210981	9788000	9789000	9790000	9791000	46	1	AT4G17560,AT4G17565,AT4G17570	AT4G17580
Chr4	13941000	13942000	Chr4	13943000	13944000	3000	3.47712	80	4.00422e-07	0.000879028	13941000	13942000	13943000	13944000	80	1	AT4G28010,AT4G28020,AT4G28025,AT4G28030,AT4G28040	AT4G28050,AT4G28060
Chr4	158000	159000	Chr4	160000	161000	3000	3.47712	63	7.38083e-10	4.86754e-06	158000	159000	160000	161000	63	1	NA	AT4G00360
Chr4	7405000	7406000	Chr4	7407000	7408000	3000	3.47712	61	9.63476e-06	0.0105006	7405000	7406000	7407000	7408000	61	1	AT4G12470	AT4G12480
Chr4	18440000	18441000	Chr4	18442000	18443000	3000	3.47712	185	2.24662e-05	0.01994	18440000	18441000	18442000	18443000	185	1	AT4G39753	AT4G39756
Chr4	11024000	11025000	Chr4	11026000	11027000	3000	3.47712	149	1.8493e-13	3.71512e-09	11024000	11025000	11026000	11027000	149	1	AT4G20410,AT4G20420,AT4G20430,AT4G20440,AT4G20450	AT4G20450,AT4G20460
Chr4	11376000	11377000	Chr4	11378000	11379000	3000	3.47712	55	3.06423e-09	1.61709e-05	11376000	11377000	11378000	11379000	55	1	AT4G21362	AT4G21366,AT4G21380
Chr4	12980000	12981000	Chr4	12982000	12983000	3000	3.47712	54	1.22385e-05	0.0126465	12980000	12981000	12982000	12983000	54	1	AT4G25390	AT4G25400,AT4G25410
Chr4	15462000	15463000	Chr4	15464000	15465000	3000	3.47712	58	5.04473e-05	0.0361134	15462000	15463000	15464000	15465000	58	1	AT4G31970	AT4G31970,AT4G31980,AT4G31985,AT4G31990,AT4G32000
Chr4	12973000	12974000	Chr4	12975000	12976000	3000	3.47712	94	1.86012e-09	1.05626e-05	12973000	12974000	12975000	12976000	94	1	AT4G25350,AT4G25360,AT4G25370	AT4G25380,AT4G25386
Chr4	113000	114000	Chr4	115000	116000	3000	3.47712	122	9.65775e-08	0.000281391	113000	114000	115000	116000	122	1	AT4G00240,AT4G00250	AT4G00260
Chr4	11095000	11096000	Chr4	11097000	11098000	3000	3.47712	23	2.43285e-06	0.0036195	11095000	11096000	11097000	11098000	23	1	AT4G20680	AT4G20690
Chr4	10823000	10824000	Chr4	10825000	10826000	3000	3.47712	81	4.53467e-06	0.00583304	10823000	10824000	10825000	10826000	81	1	AT4G19960,AT4G19970	AT4G19970,AT4G19980,AT4G19985,AT4G19990
Chr4	13886000	13887000	Chr4	13888000	13889000	3000	3.47712	87	7.42587e-09	3.41394e-05	13886000	13887000	13888000	13889000	87	1	AT4G27870,AT4G27875,AT4G27880,AT4G27885,AT4G27890	AT4G27890,AT4G27900,AT4G27910
Chr4	6162000	6163000	Chr4	6164000	6165000	3000	3.47712	88	1.21875e-06	0.00211743	6162000	6163000	6164000	6165000	88	1	AT4G09780,AT4G09784	NA
Chr4	9434000	9435000	Chr4	9436000	9437000	3000	3.47712	42	4.34321e-05	0.0322855	9434000	9435000	9436000	9437000	42	1	AT4G16770	AT4G16770
Chr4	14877000	14878000	Chr4	14879000	14880000	3000	3.47712	62	4.78894e-06	0.0060926	14877000	14878000	14879000	14880000	62	1	AT4G30420	AT4G30430
Chr4	17316000	17317000	Chr4	17318000	17319000	3000	3.47712	22	2.84863e-06	0.00408466	17316000	17317000	17318000	17319000	22	1	AT4G36740	NA
Chr4	9314000	9315000	Chr4	9316000	9317000	3000	3.47712	103	9.07833e-06	0.0100162	9314000	9315000	9316000	9317000	103	1	AT4G16510,AT4G16515,AT4G16520,AT4G16530	AT4G16540
Chr4	14558000	14559000	Chr4	14560000	14561000	3000	3.47712	85	2.84502e-07	0.000667693	14558000	14559000	14560000	14561000	85	1	AT4G29720,AT4G29730	AT4G29730,AT4G29735,AT4G29740
Chr4	13338000	13339000	Chr4	13340000	13341000	3000	3.47712	96	6.72921e-06	0.00793247	13338000	13339000	13340000	13341000	96	1	AT4G26350,AT4G26365,AT4G26370,AT4G26375,AT4G26380	AT4G26380,AT4G26385,AT4G26390,AT4G26400,AT4G26410,AT4G26420
Chr4	13004000	13005000	Chr4	13006000	13007000	3000	3.47712	114	7.82017e-05	0.0497409	13004000	13005000	13006000	13007000	114	1	AT4G25434	AT4G25435,AT4G25440,AT4G25450
Chr4	14235000	14236000	Chr4	14237000	14238000	3000	3.47712	64	9.56664e-07	0.00174117	14235000	14236000	14237000	14238000	64	1	NA	NA
Chr4	11919000	11920000	Chr4	11921000	11922000	3000	3.47712	48	5.35987e-05	0.0377884	11919000	11920000	11921000	11922000	48	1	AT4G22670	AT4G22680
Chr4	2693000	2694000	Chr4	2695000	2696000	3000	3.47712	112	1.25479e-09	7.54327e-06	2693000	2694000	2695000	2696000	112	1	AT4G05260	AT4G05265,AT4G05270
Chr4	14811000	14812000	Chr4	14813000	14814000	3000	3.47712	44	9.95442e-08	0.000287853	14811000	14812000	14813000	14814000	44	1	AT4G30250	AT4G30260
Chr4	7014000	7015000	Chr4	7016000	7017000	3000	3.47712	298	4.23458e-07	0.000914969	7014000	7015000	7016000	7017000	298	1	AT4G11610	AT4G11610,AT4G11630,AT4G11640,AT4G11650
Chr4	14922000	14923000	Chr4	14924000	14925000	3000	3.47712	65	7.32671e-05	0.0474223	14922000	14923000	14924000	14925000	65	1	AT4G30530	AT4G30540,AT4G30550,AT4G30560
Chr4	6869000	6870000	Chr4	6871000	6872000	3000	3.47712	56	1.82776e-07	0.000469801	6869000	6870000	6871000	6872000	56	1	AT4G11290	AT4G11290,AT4G11300
Chr4	13251000	13252000	Chr4	13253000	13254000	3000	3.47712	66	1.46262e-05	0.0144443	13251000	13252000	13253000	13254000	66	1	AT4G26130,AT4G26140	AT4G26150,AT4G26160,AT4G26170,AT4G26180
Chr4	17590000	17591000	Chr4	17592000	17593000	3000	3.47712	45	4.44557e-06	0.00574315	17590000	17591000	17592000	17593000	45	1	AT4G37409,AT4G37410	AT4G37409,AT4G37410
Chr4	15667000	15668000	Chr4	15669000	15670000	3000	3.47712	88	8.92319e-10	5.71139e-06	15667000	15668000	15669000	15670000	88	1	NA	AT4G32470
Chr4	8296000	8297000	Chr4	8298000	8299000	3000	3.47712	62	1.04928e-07	0.000300232	8296000	8297000	8298000	8299000	62	1	AT4G14390,AT4G14400	AT4G14400,AT4G14403,AT4G14410,AT4G14415,AT4G14420
Chr4	12530000	12531000	Chr4	12532000	12533000	3000	3.47712	129	1.43519e-06	0.00239931	12530000	12531000	12532000	12533000	129	1	AT4G24140	AT4G24140
Chr4	6416000	6417000	Chr4	6418000	6419000	3000	3.47712	66	1.43934e-05	0.0142932	6416000	6417000	6418000	6419000	66	1	AT4G10350	NA
Chr4	2510000	2511000	Chr4	2512000	2513000	3000	3.47712	83	3.4787e-07	0.000783447	2510000	2511000	2512000	2513000	83	1	AT4G04930	AT4G04940
Chr4	5444000	5445000	Chr4	5446000	5447000	3000	3.47712	105	1.42167e-08	5.9314e-05	5444000	5445000	5446000	5447000	105	1	AT4G08550	AT4G08550,AT4G08555
Chr4	11118000	11119000	Chr4	11120000	11121000	3000	3.47712	20	4.47759e-05	0.0330531	11118000	11119000	11120000	11121000	20	1	NA	AT4G20740
Chr4	8839000	8840000	Chr4	8841000	8842000	3000	3.47712	77	3.72279e-06	0.00501116	8839000	8840000	8841000	8842000	77	1	AT4G15430,AT4G15440,AT4G15450	AT4G15450,AT4G15460,AT4G15470,AT4G15475,AT4G15480
Chr4	9416000	9417000	Chr4	9418000	9419000	3000	3.47712	23	4.74175e-05	0.0344134	9416000	9417000	9418000	9419000	23	1	NA	AT4G16748,AT4G16750
Chr4	15350000	15351000	Chr4	15352000	15353000	3000	3.47712	189	7.90308e-08	0.000238306	15350000	15351000	15352000	15353000	189	1	AT4G31680,AT4G31690,AT4G31695,AT4G31700,AT4G31710	AT4G31710
Chr4	9856000	9857000	Chr4	9858000	9859000	3000	3.47712	139	4.01116e-12	5.47954e-08	9856000	9857000	9858000	9859000	139	1	AT4G17710	AT4G17710,AT4G17713,AT4G17718,AT4G17720,AT4G17730,AT4G17740
Chr4	12257000	12258000	Chr4	12259000	12260000	3000	3.47712	76	8.15875e-06	0.00925703	12257000	12258000	12259000	12260000	76	1	AT4G23460,AT4G23470,AT4G23490,AT4G23493,AT4G23496	AT4G23500,AT4G23510
Chr4	6546000	6547000	Chr4	6548000	6549000	3000	3.47712	43	2.95793e-06	0.00419538	6546000	6547000	6548000	6549000	43	1	AT4G10595,AT4G10596	AT4G10600,AT4G10603,AT4G10610
Chr4	16565000	16566000	Chr4	16567000	16568000	3000	3.47712	26	3.98962e-05	0.0302977	16565000	16566000	16567000	16568000	26	1	NA	AT4G34720,AT4G34730
Chr4	7105000	7106000	Chr4	7107000	7108000	3000	3.47712	92	4.41843e-06	0.00573044	7105000	7106000	7107000	7108000	92	1	AT4G11800,AT4G11810	AT4G11810
Chr4	5665000	5666000	Chr4	5667000	5668000	3000	3.47712	124	3.21213e-05	0.0258031	5665000	5666000	5667000	5668000	124	1	NA	NA
Chr4	11641000	11642000	Chr4	11643000	11644000	3000	3.47712	59	4.81675e-11	4.70003e-07	11641000	11642000	11643000	11644000	59	1	AT4G21940	AT4G21940
Chr4	13712000	13713000	Chr4	13714000	13715000	3000	3.47712	118	1.01318e-08	4.45245e-05	13712000	13713000	13714000	13715000	118	1	AT4G27415,AT4G27420	AT4G27420
Chr4	10680000	10681000	Chr4	10682000	10683000	3000	3.47712	116	2.05684e-05	0.0187	10680000	10681000	10682000	10683000	116	1	AT4G19590,AT4G19600,AT4G19610	AT4G19620
Chr4	14303000	14304000	Chr4	14305000	14306000	3000	3.47712	31	6.84826e-05	0.0452693	14303000	14304000	14305000	14306000	31	1	AT4G28990,AT4G29000,AT4G29010	AT4G29020
Chr4	8008000	8009000	Chr4	8010000	8011000	3000	3.47712	141	4.269e-16	1.8063e-11	8008000	8009000	8010000	8011000	141	1	AT4G13810,AT4G13820	AT4G13820,AT4G13830
Chr4	2442000	2443000	Chr4	2444000	2445000	3000	3.47712	19	2.89035e-05	0.0238885	2442000	2443000	2444000	2445000	19	1	AT4G04810	NA
Chr4	7227000	7228000	Chr4	7229000	7230000	3000	3.47712	55	1.86322e-06	0.00295063	7227000	7228000	7229000	7230000	55	1	NA	AT4G12060,AT4G12070,AT4G12065
Chr4	6370000	6371000	Chr4	6372000	6373000	3000	3.47712	90	1.55259e-06	0.00255273	6370000	6371000	6372000	6373000	90	1	AT4G10230,AT4G10240,AT4G10250	AT4G10260,AT4G10265,AT4G10270,AT4G10280,AT4G10290
Chr4	13165000	13166000	Chr4	13167000	13168000	3000	3.47712	101	4.40534e-05	0.0326458	13165000	13166000	13167000	13168000	101	1	AT4G25880,AT4G25885,AT4G25890,AT4G25900,AT4G25910,AT4G25920	AT4G25930,AT4G25940,AT4G25950,AT4G25960
Chr4	13210000	13211000	Chr4	13212000	13213000	3000	3.47712	84	1.42184e-09	8.41359e-06	13210000	13211000	13212000	13213000	84	1	AT4G26005,AT4G26010,AT4G26020,AT4G26030,AT4G26040,AT4G26050	AT4G26050,AT4G26055,AT4G26060,AT4G26070,AT4G26080
Chr4	10371000	10372000	Chr4	10373000	10374000	3000	3.47712	52	7.56637e-05	0.0485334	10371000	10372000	10373000	10374000	52	1	AT4G18920,AT4G18930	AT4G18940,AT4G18950
Chr4	17720000	17721000	Chr4	17722000	17723000	3000	3.47712	29	2.80543e-07	0.000660113	17720000	17721000	17722000	17723000	29	1	NA	AT4G37730
Chr4	9186000	9187000	Chr4	9188000	9189000	3000	3.47712	139	9.02721e-12	1.08993e-07	9186000	9187000	9188000	9189000	139	1	AT4G16230	AT4G16235,AT4G16240
Chr4	10966000	10967000	Chr4	10968000	10969000	3000	3.47712	35	5.2109e-05	0.0369603	10966000	10967000	10968000	10969000	35	1	AT4G20310	NA
Chr4	4791000	4792000	Chr4	4793000	4794000	3000	3.47712	32	3.37009e-07	0.000763301	4791000	4792000	4793000	4794000	32	1	NA	AT4G07940,AT4G07950,AT4G07960
Chr4	17710000	17711000	Chr4	17712000	17713000	3000	3.47712	32	5.84217e-05	0.0401912	17710000	17711000	17712000	17713000	32	1	AT4G37682,AT4G37685,AT4G37690,AT4G37700	NA
Chr4	1006000	1007000	Chr4	1008000	1009000	3000	3.47712	46	8.94586e-06	0.00990103	1006000	1007000	1008000	1009000	46	1	NA	NA
Chr4	15069000	15070000	Chr4	15071000	15072000	3000	3.47712	39	9.38385e-07	0.00171443	15069000	15070000	15071000	15072000	39	1	AT4G30960,AT4G30970	AT4G30970
Chr4	14807000	14808000	Chr4	14809000	14810000	3000	3.47712	36	1.05528e-05	0.0112927	14807000	14808000	14809000	14810000	36	1	AT4G30230,AT4G30240	AT4G30240
Chr4	11913000	11914000	Chr4	11915000	11916000	3000	3.47712	204	2.04508e-05	0.0186284	11913000	11914000	11915000	11916000	204	1	AT4G22650	AT4G22660
Chr4	2319000	2320000	Chr4	2321000	2322000	3000	3.47712	16	6.63195e-05	0.0441508	2319000	2320000	2321000	2322000	16	1	NA	AT4G04610,AT4G04614,AT4G04620,AT4G04630
Chr4	14975000	14976000	Chr4	14977000	14978000	3000	3.47712	86	2.54901e-07	0.000612129	14975000	14976000	14977000	14978000	86	1	AT4G30700,AT4G30710,AT4G30720	NA
Chr4	18332000	18333000	Chr4	18334000	18335000	3000	3.47712	36	4.38155e-08	0.000148052	18332000	18333000	18334000	18335000	36	1	AT4G39400,AT4G39403,AT4G39404,AT4G39410	AT4G39410,AT4G39420
Chr4	13985000	13986000	Chr4	13987000	13988000	3000	3.47712	34	5.10891e-05	0.0364543	13985000	13986000	13987000	13988000	34	1	AT4G28160,AT4G28162,AT4G28170,AT4G28180,AT4G28181,AT4G28190	AT4G28190,AT4G28200,AT4G28210,AT4G28220,AT4G28230,AT4G28240
Chr4	5982000	5983000	Chr4	5984000	5985000	3000	3.47712	130	1.13512e-12	1.86504e-08	5982000	5983000	5984000	5985000	130	1	AT4G09430,AT4G09432,AT4G09440	AT4G09450
Chr4	15511000	15512000	Chr4	15513000	15514000	3000	3.47712	42	1.40858e-08	5.89738e-05	15511000	15512000	15513000	15514000	42	1	AT4G32090,AT4G32100	AT4G32105,AT4G32110,AT4G32120,AT4G32130,AT4G32140
Chr4	16549000	16550000	Chr4	16551000	16552000	3000	3.47712	50	2.74871e-06	0.00399098	16549000	16550000	16551000	16552000	50	1	AT4G34640,AT4G34650,AT4G34660,AT4G34670	AT4G34680,AT4G34690,AT4G34695,AT4G34700
Chr4	860000	861000	Chr4	862000	863000	3000	3.47712	71	6.98819e-08	0.000216689	860000	861000	862000	863000	71	1	AT4G01970	NA
Chr4	14984000	14985000	Chr4	14986000	14987000	3000	3.47712	94	6.3604e-08	0.000199677	14984000	14985000	14986000	14987000	94	1	AT4G30760	AT4G30770
Chr4	14082000	14083000	Chr4	14084000	14085000	3000	3.47712	111	6.40846e-05	0.0430283	14082000	14083000	14084000	14085000	111	1	AT4G28470,AT4G28480,AT4G28485,AT4G28490,AT4G28500	AT4G28500,AT4G28510
Chr4	8634000	8635000	Chr4	8636000	8637000	3000	3.47712	51	1.46118e-05	0.0144443	8634000	8635000	8636000	8637000	51	1	AT4G15110,AT4G15120	AT4G15130,AT4G15140,AT4G15150,AT4G15160
Chr4	6075000	6076000	Chr4	6077000	6078000	3000	3.47712	88	1.07001e-05	0.0114146	6075000	6076000	6077000	6078000	88	1	AT4G09610	AT4G09620
Chr4	10716000	10717000	Chr4	10718000	10719000	3000	3.47712	12	2.6133e-05	0.0222566	10716000	10717000	10718000	10719000	12	1	NA	NA
Chr4	17630000	17631000	Chr4	17632000	17633000	3000	3.47712	55	2.5907e-05	0.0221114	17630000	17631000	17632000	17633000	55	1	NA	AT4G37520
Chr4	16422000	16423000	Chr4	16424000	16425000	3000	3.47712	93	7.33065e-05	0.047435	16422000	16423000	16424000	16425000	93	1	AT4G34290,AT4G34300,AT4G34310,AT4G34320	AT4G34330,AT4G34332
Chr4	15451000	15452000	Chr4	15453000	15454000	3000	3.47712	137	6.23219e-10	4.20872e-06	15451000	15452000	15453000	15454000	137	1	AT4G31930,AT4G31940	AT4G31940
Chr5	26067000	26068000	Chr5	26069000	26070000	3000	3.47712	112	3.77966e-08	0.000131048	26063000	26068000	26066000	26070000	502	0.45	NA	AT5G65230,AT5G65240
Chr5	25998000	25999000	Chr5	26000000	26001000	3000	3.47712	73	1.01021e-08	4.44348e-05	25997000	26001000	25999000	26002000	411	0.583333	AT5G65080	AT5G65080
Chr5	23703000	23704000	Chr5	23705000	23706000	3000	3.47712	131	1.44128e-09	8.50758e-06	23703000	23705000	23704000	23707000	627	0.833333	AT5G58620,AT5G58630,AT5G58640,AT5G58650,AT5G58660	AT5G58670,AT5G58680,AT5G58690,AT5G58700
Chr5	8163000	8164000	Chr5	8165000	8166000	3000	3.47712	192	1.70782e-11	1.91231e-07	8162000	8164000	8164000	8168000	630	0.625	AT5G24110,AT5G24120,AT5G24130	AT5G24140
Chr5	1603000	1604000	Chr5	1605000	1606000	3000	3.47712	115	3.91092e-09	1.98927e-05	1602000	1605000	1604000	1607000	326	0.555556	AT5G05390,AT5G05400,AT5G05410,AT5G05420	AT5G05430,AT5G05435
Chr5	24965000	24966000	Chr5	24967000	24968000	3000	3.47712	83	5.5749e-12	7.30276e-08	24964000	24967000	24965000	24968000	360	0.555556	AT5G62165	AT5G62165
Chr5	24253000	24254000	Chr5	24255000	24256000	3000	3.47712	59	1.73379e-13	3.52753e-09	24252000	24254000	24253000	24257000	324	0.625	AT5G60220,AT5G60230,AT5G60240,AT5G60250	AT5G60260,AT5G60270,AT5G60280,AT5G60285,AT5G60290
Chr5	26623000	26624000	Chr5	26625000	26626000	3000	3.47712	73	4.99807e-11	4.84727e-07	26622000	26625000	26625000	26627000	190	0.666667	AT5G66680	AT5G66690
Chr5	7230000	7231000	Chr5	7232000	7233000	3000	3.47712	31	1.08212e-09	6.67601e-06	7230000	7233000	7232000	7234000	159	0.666667	AT5G21482	AT5G21900
Chr5	3047000	3048000	Chr5	3049000	3050000	3000	3.47712	60	7.82981e-12	9.67348e-08	3046000	3048000	3047000	3050000	191	0.666667	AT5G09790,AT5G09800,AT5G09805	AT5G09810,AT5G09820,AT5G09830,AT5G09840
Chr5	3026000	3027000	Chr5	3028000	3029000	3000	3.47712	139	8.40111e-08	0.000250267	3026000	3027000	3027000	3031000	418	1	AT5G09740,AT5G09750	AT5G09755,AT5G09760,AT5G09770,AT5G09780
Chr5	23600000	23601000	Chr5	23602000	23603000	3000	3.47712	139	1.55781e-11	1.77763e-07	23599000	23602000	23601000	23603000	364	0.666667	AT5G58360,AT5G58370,AT5G58375,AT5G58380,AT5G58390	AT5G58400,AT5G58410
Chr5	26113000	26114000	Chr5	26115000	26116000	3000	3.47712	53	4.51417e-12	6.0594e-08	26112000	26115000	26114000	26116000	212	0.666667	AT5G65340	NA
Chr5	6720000	6721000	Chr5	6722000	6723000	3000	3.47712	91	1.34774e-09	8.0348e-06	6720000	6722000	6722000	6725000	268	0.666667	AT5G19850,AT5G19855,AT5G19860,AT5G19870,AT5G19875,AT5G19880	AT5G19880
Chr5	24945000	24946000	Chr5	24947000	24948000	3000	3.47712	60	3.12436e-10	2.35993e-06	24945000	24947000	24946000	24949000	197	0.666667	AT5G62090,AT5G62100,AT5G62110	AT5G62120,AT5G62130
Chr5	569000	570000	Chr5	571000	572000	3000	3.47712	38	3.89428e-08	0.000134534	567000	570000	570000	572000	120	0.666667	AT5G02540	AT5G02550
Chr5	21624000	21625000	Chr5	21626000	21627000	3000	3.47712	76	4.69854e-09	2.32797e-05	21623000	21625000	21624000	21627000	334	0.666667	NA	NA
Chr5	14986000	14987000	Chr5	14988000	14989000	3000	3.47712	74	1.90543e-07	0.000485109	14985000	14987000	14987000	14989000	227	0.75	AT5G37720,AT5G37730	AT5G37740,AT5G37750,AT5G37760
Chr5	22658000	22659000	Chr5	22660000	22661000	3000	3.47712	46	5.74029e-07	0.00116497	22658000	22660000	22659000	22661000	156	0.75	AT5G55940,AT5G55950	AT5G55950,AT5G55960,AT5G55970,AT5G55980
Chr5	24492000	24493000	Chr5	24494000	24495000	3000	3.47712	67	5.97613e-08	0.000190236	24492000	24495000	24494000	24496000	215	0.5	NA	AT5G60890
Chr5	3254000	3255000	Chr5	3256000	3257000	3000	3.47712	61	3.60578e-09	1.86179e-05	3253000	3255000	3256000	3258000	164	0.75	AT5G10340	AT5G10350,AT5G10360,AT5G10370
Chr5	25409000	25410000	Chr5	25411000	25412000	3000	3.47712	47	2.61697e-08	9.65872e-05	25409000	25411000	25410000	25412000	187	0.75	AT5G63420,AT5G63440,AT5G63450	AT5G63460,AT5G63470,AT5G63480
Chr5	775000	776000	Chr5	777000	778000	3000	3.47712	168	7.92457e-21	8.61123e-16	775000	777000	777000	779000	323	0.75	AT5G03230,AT5G03240,AT5G03250	AT5G03250,AT5G03260,AT5G03270,AT5G03280
Chr5	3176000	3177000	Chr5	3178000	3179000	3000	3.47712	61	9.00279e-08	0.00026518	3174000	3177000	3177000	3179000	202	0.5	AT5G10140	AT5G10140
Chr5	5767000	5768000	Chr5	5769000	5770000	3000	3.47712	70	5.5698e-08	0.000179869	5767000	5769000	5769000	5772000	277	0.5	AT5G17500	AT5G17500,AT5G17510,AT5G17520,AT5G17523,AT5G17530
Chr5	1559000	1560000	Chr5	1561000	1562000	3000	3.47712	102	1.78841e-15	6.10774e-11	1559000	1561000	1560000	1562000	391	0.75	AT5G05220,AT5G05230,AT5G05240,AT5G05250,AT5G05260	AT5G05260,AT5G05270
Chr5	10129000	10130000	Chr5	10131000	10132000	3000	3.47712	254	4.43153e-09	2.21403e-05	10129000	10130000	10130000	10133000	600	1	NA	NA
Chr5	23923000	23924000	Chr5	23925000	23926000	3000	3.47712	81	1.25266e-09	7.54322e-06	23922000	23924000	23923000	23926000	235	0.5	AT5G59270,AT5G59280,AT5G59290,AT5G59300,AT5G59305	AT5G59310
Chr5	9476000	9477000	Chr5	9478000	9479000	3000	3.47712	116	3.82814e-11	3.87782e-07	9476000	9478000	9478000	9480000	308	0.75	AT5G26910,AT5G26912,AT5G26920	AT5G26920,AT5G26930,AT5G26940,AT5G26950,AT5G26960,AT5G26970,AT5G26980
Chr5	6115000	6116000	Chr5	6117000	6118000	3000	3.47712	57	7.96281e-06	0.00907563	6114000	6116000	6116000	6118000	242	0.75	AT5G18410,AT5G18420,AT5G18430,AT5G18440	AT5G18450
Chr5	2242000	2243000	Chr5	2244000	2245000	3000	3.47712	34	3.06003e-08	0.000110172	2241000	2244000	2244000	2246000	104	0.5	NA	AT5G07200
Chr5	24582000	24583000	Chr5	24584000	24585000	3000	3.47712	86	6.6092e-08	0.000206403	24581000	24583000	24583000	24586000	240	0.5	AT5G61110,AT5G61120	AT5G61120
Chr5	6873000	6874000	Chr5	6875000	6876000	3000	3.47712	47	7.91674e-06	0.00903389	6872000	6874000	6874000	6876000	198	0.75	AT5G20330	AT5G20340,AT5G20350
Chr5	20730000	20731000	Chr5	20732000	20733000	3000	3.47712	51	8.97657e-06	0.00992584	20730000	20731000	20731000	20734000	158	1	AT5G50950	AT5G50950
Chr5	24772000	24773000	Chr5	24774000	24775000	3000	3.47712	95	9.08106e-09	4.06164e-05	24772000	24774000	24773000	24775000	285	0.75	AT5G61620	AT5G61630,AT5G61640
Chr5	717000	718000	Chr5	719000	720000	3000	3.47712	66	1.0508e-06	0.00188666	717000	718000	718000	721000	170	1	AT5G03060	AT5G03070,AT5G03080,AT5G03090
Chr5	24237000	24238000	Chr5	24239000	24240000	3000	3.47712	26	4.21789e-07	0.000913767	24237000	24239000	24239000	24241000	112	0.75	NA	NA
Chr5	732000	733000	Chr5	734000	735000	3000	3.47712	38	6.10584e-06	0.00734985	732000	734000	733000	735000	116	0.75	AT5G03100,AT5G03110	AT5G03120,AT5G03130
Chr5	6183000	6184000	Chr5	6185000	6186000	3000	3.47712	66	5.17963e-08	0.000169741	6183000	6185000	6184000	6187000	191	0.5	AT5G18580,AT5G18590,AT5G18600	AT5G18610,AT5G18620
Chr5	15707000	15708000	Chr5	15709000	15710000	3000	3.47712	49	5.61723e-08	0.00018098	15707000	15710000	15709000	15711000	147	0.5	AT5G39210,AT5G39220	AT5G39230,AT5G39240
Chr5	25902000	25903000	Chr5	25904000	25905000	3000	3.47712	85	1.57624e-15	5.54147e-11	25901000	25903000	25903000	25905000	243	0.75	AT5G64780,AT5G64790	AT5G64790
Chr5	8779000	8780000	Chr5	8781000	8782000	3000	3.47712	183	4.62485e-10	3.25664e-06	8778000	8780000	8781000	8782000	251	1	AT5G25280,AT5G25290	AT5G25300
Chr5	7703000	7704000	Chr5	7705000	7706000	3000	3.47712	117	1.18748e-07	0.000333105	7703000	7704000	7705000	7707000	167	1	AT5G23010	AT5G23010
Chr5	18703000	18704000	Chr5	18705000	18706000	3000	3.47712	218	5.38582e-13	9.64457e-09	18703000	18704000	18705000	18707000	277	1	AT5G46090,AT5G46100,AT5G46110,AT5G46105,AT5G46115,AT5G46130	AT5G46140
Chr5	22940000	22941000	Chr5	22942000	22943000	3000	3.47712	56	2.34141e-05	0.0205641	22940000	22942000	22942000	22944000	128	0.5	AT5G56670,AT5G56680,AT5G56690	AT5G56700,AT5G56710,AT5G56720,AT5G56730
Chr5	5150000	5151000	Chr5	5152000	5153000	3000	3.47712	136	2.53757e-07	0.000609993	5150000	5151000	5151000	5153000	345	1	AT5G15750,AT5G15760,AT5G15770,AT5G15780,AT5G15790	AT5G15800
Chr5	5703000	5704000	Chr5	5705000	5706000	3000	3.47712	155	8.78906e-13	1.46421e-08	5703000	5704000	5705000	5707000	201	1	AT5G17310,AT5G17320	AT5G17320
Chr5	22238000	22239000	Chr5	22240000	22241000	3000	3.47712	142	7.52792e-10	4.95088e-06	22238000	22239000	22240000	22242000	221	1	AT5G54740	AT5G54745,AT5G54750,AT5G54760,AT5G54770,AT5G54780
Chr5	513000	514000	Chr5	515000	516000	3000	3.47712	66	2.60279e-09	1.39985e-05	513000	515000	515000	516000	177	1	AT5G02400	AT5G02400,AT5G02410
Chr5	17857000	17858000	Chr5	17859000	17860000	3000	3.47712	129	3.55015e-10	2.64396e-06	17857000	17858000	17859000	17861000	212	1	AT5G44320,AT5G44330	AT5G44330,AT5G44340
Chr5	14531000	14532000	Chr5	14533000	14534000	3000	3.47712	83	3.44949e-07	0.000778335	14530000	14532000	14533000	14534000	169	1	AT5G36870	AT5G36870,AT5G36880,AT5G36890
Chr5	3474000	3475000	Chr5	3476000	3477000	3000	3.47712	63	2.27225e-08	8.72058e-05	3474000	3475000	3475000	3477000	123	1	NA	AT5G10990
Chr5	14823000	14824000	Chr5	14825000	14826000	3000	3.47712	185	3.71508e-14	8.8293e-10	14822000	14824000	14824000	14826000	308	0.5	AT5G37370,AT5G37380	NA
Chr5	21738000	21739000	Chr5	21740000	21741000	3000	3.47712	85	2.8264e-10	2.1553e-06	21738000	21739000	21740000	21742000	130	1	AT5G53510	AT5G53510
Chr5	24418000	24419000	Chr5	24420000	24421000	3000	3.47712	62	1.24708e-05	0.0128064	24418000	24419000	24419000	24421000	131	1	AT5G60710,AT5G60720	AT5G60720
Chr5	504000	505000	Chr5	506000	507000	3000	3.47712	179	1.11016e-14	3.03312e-10	503000	505000	506000	507000	255	1	AT5G02370	AT5G02370,AT5G02380
Chr5	12602000	12603000	Chr5	12604000	12605000	3000	3.47712	59	5.13746e-08	0.00016859	12602000	12604000	12604000	12605000	109	1	AT5G33370	AT5G33370
Chr5	5425000	5426000	Chr5	5427000	5428000	3000	3.47712	61	2.88916e-10	2.19965e-06	5425000	5426000	5426000	5428000	144	1	AT5G16580	AT5G16580
Chr5	23949000	23950000	Chr5	23951000	23952000	3000	3.47712	89	3.24479e-09	1.70112e-05	23949000	23951000	23951000	23952000	206	1	AT5G59370	AT5G59370,AT5G59380
Chr5	4797000	4798000	Chr5	4799000	4800000	3000	3.47712	80	6.78855e-14	1.50268e-09	4797000	4798000	4798000	4800000	230	1	NA	NA
Chr5	26211000	26212000	Chr5	26213000	26214000	3000	3.47712	65	1.17558e-07	0.00033044	26211000	26212000	26212000	26214000	201	1	AT5G65590	AT5G65590,AT5G65600,AT5G65609,AT5G65610,AT5G65615
Chr5	19988000	19989000	Chr5	19990000	19991000	3000	3.47712	128	3.96784e-10	2.88756e-06	19987000	19989000	19990000	19991000	183	1	AT5G49290,AT5G49300	NA
Chr5	15609000	15610000	Chr5	15611000	15612000	3000	3.47712	84	1.46077e-06	0.00243441	15609000	15611000	15611000	15612000	172	1	AT5G38980,AT5G38990	AT5G38990,AT5G39000
Chr5	15739000	15740000	Chr5	15741000	15742000	3000	3.47712	54	1.41464e-06	0.00237242	15739000	15741000	15741000	15742000	115	1	AT5G39310	NA
Chr5	3274000	3275000	Chr5	3276000	3277000	3000	3.47712	76	2.37474e-14	5.85271e-10	3274000	3276000	3276000	3277000	147	1	AT5G10380,AT5G10390,AT5G10400,AT5G10410,AT5G10420	AT5G10420,AT5G10430
Chr5	24847000	24848000	Chr5	24849000	24850000	3000	3.47712	97	4.67562e-11	4.59987e-07	24847000	24848000	24848000	24850000	220	1	AT5G61830,AT5G61835,AT5G61840,AT5G61850,AT5G61865	AT5G61865,AT5G61880
Chr5	7011000	7012000	Chr5	7013000	7014000	3000	3.47712	120	1.87012e-07	0.000478669	7011000	7013000	7013000	7014000	319	1	AT5G20710	AT5G20710,AT5G20720,AT5G20730
Chr5	16052000	16053000	Chr5	16054000	16055000	3000	3.47712	108	2.09963e-05	0.0189727	16051000	16053000	16054000	16055000	137	1	AT5G40090,AT5G40100,AT5G40120	AT5G40140,AT5G40150,AT5G40155,AT5G40160
Chr5	22482000	22483000	Chr5	22484000	22485000	3000	3.47712	69	4.50145e-07	0.000955287	22482000	22484000	22484000	22485000	159	1	AT5G55500	AT5G55500,AT5G55505
Chr5	4230000	4231000	Chr5	4232000	4233000	3000	3.47712	30	1.57227e-05	0.0152824	4229000	4231000	4231000	4233000	78	0.5	NA	NA
Chr5	2620000	2621000	Chr5	2622000	2623000	3000	3.47712	35	3.30142e-06	0.00455659	2620000	2622000	2622000	2623000	73	1	NA	AT5G08150
Chr5	17433000	17434000	Chr5	17435000	17436000	3000	3.47712	89	2.45677e-07	0.000595059	17432000	17434000	17435000	17436000	176	1	AT5G43403	AT5G43410
Chr5	22269000	22270000	Chr5	22271000	22272000	3000	3.47712	68	1.38333e-05	0.0138892	22268000	22270000	22271000	22272000	139	1	AT5G54820	AT5G54820,AT5G54830,AT5G54840,AT5G54850
Chr5	4166000	4167000	Chr5	4168000	4169000	3000	3.47712	82	4.44046e-06	0.00574206	4166000	4167000	4167000	4169000	185	1	AT5G13110,AT5G13120,AT5G13130	AT5G13130
Chr5	10023000	10024000	Chr5	10025000	10026000	3000	3.47712	66	3.11593e-05	0.0252553	10023000	10025000	10025000	10026000	138	1	AT5G27970,AT5G27980,AT5G27990,AT5G28000	AT5G28010,AT5G28020
Chr5	1283000	1284000	Chr5	1285000	1286000	3000	3.47712	86	2.90626e-08	0.000105831	1283000	1284000	1284000	1286000	193	1	AT5G04490,AT5G04500	AT5G04500,AT5G04510
Chr5	3991000	3992000	Chr5	3993000	3994000	3000	3.47712	59	8.74446e-07	0.00161927	3991000	3993000	3993000	3994000	133	1	NA	AT5G12340,AT5G12350
Chr5	26346000	26347000	Chr5	26348000	26349000	3000	3.47712	86	4.38767e-14	1.01838e-09	26346000	26348000	26348000	26349000	157	1	AT5G65840,AT5G65850	AT5G65860,AT5G65870,AT5G65880,AT5G65890,AT5G65900
Chr5	492000	493000	Chr5	494000	495000	3000	3.47712	84	8.10743e-08	0.000243185	492000	493000	493000	495000	234	1	AT5G02340	AT5G02340
Chr5	22204000	22205000	Chr5	22206000	22207000	3000	3.47712	82	3.71363e-10	2.74858e-06	22204000	22205000	22205000	22207000	195	1	AT5G54660	AT5G54670
Chr5	2404000	2405000	Chr5	2406000	2407000	3000	3.47712	171	2.5126e-08	9.42226e-05	2404000	2405000	2406000	2408000	273	1	AT5G07600	AT5G07610,AT5G07620,AT5G07630,AT5G07625,AT5G07640,AT5G07650
Chr5	23146000	23147000	Chr5	23148000	23149000	3000	3.47712	152	1.01089e-09	6.29341e-06	23145000	23147000	23148000	23149000	250	1	AT5G57130	AT5G57130,AT5G57140,AT5G57150,AT5G57160
Chr5	8695000	8696000	Chr5	8697000	8698000	3000	3.47712	37	4.04261e-05	0.0305787	8694000	8696000	8696000	8698000	76	0.5	AT5G25170,AT5G25180	AT5G25180
Chr5	4763000	4764000	Chr5	4765000	4766000	3000	3.47712	41	3.77891e-09	1.93655e-05	4763000	4764000	4764000	4766000	99	1	AT5G14750	AT5G14760,AT5G14770
Chr5	1739000	1740000	Chr5	1741000	1742000	3000	3.47712	59	9.1968e-06	0.0101225	1739000	1741000	1741000	1742000	186	1	NA	AT5G05790,AT5G05795,AT5G05800,AT5G05810,AT5G05820
Chr5	18509000	18510000	Chr5	18511000	18512000	3000	3.47712	62	5.32629e-06	0.00661635	18509000	18511000	18511000	18512000	106	1	AT5G45610,AT5G45620,AT5G45630,AT5G45640	AT5G45640
Chr5	13853000	13854000	Chr5	13855000	13856000	3000	3.47712	64	4.23012e-07	0.000914774	13853000	13854000	13855000	13857000	100	1	AT5G35660	NA
Chr5	25864000	25865000	Chr5	25866000	25867000	3000	3.47712	39	2.7094e-07	0.000642443	25863000	25865000	25866000	25867000	76	1	AT5G64690	AT5G64700
Chr5	2304000	2305000	Chr5	2306000	2307000	3000	3.47712	46	3.2623e-07	0.000742404	2304000	2306000	2306000	2307000	116	1	AT5G07290,AT5G07300	AT5G07310
Chr5	17632000	17633000	Chr5	17634000	17635000	3000	3.47712	45	1.02214e-07	0.000293697	17632000	17633000	17633000	17635000	112	1	AT5G43860,AT5G43870	AT5G43870,AT5G43880
Chr5	3080000	3081000	Chr5	3082000	3083000	3000	3.47712	93	3.19033e-07	0.000730895	3080000	3082000	3082000	3083000	160	1	AT5G09860,AT5G09870,AT5G09876	AT5G09880,AT5G09890
Chr5	3510000	3511000	Chr5	3512000	3513000	3000	3.47712	56	1.72901e-05	0.0164579	3510000	3511000	3511000	3513000	116	1	AT5G11060	AT5G11060
Chr5	2269000	2270000	Chr5	2271000	2272000	3000	3.47712	48	1.90239e-07	0.000484595	2269000	2270000	2270000	2272000	98	1	AT5G07225	AT5G07230,AT5G07240
Chr5	2441000	2442000	Chr5	2443000	2444000	3000	3.47712	44	2.86731e-06	0.00410336	2441000	2442000	2442000	2444000	134	1	AT5G07670,AT5G07675,AT5G07680	NA
Chr5	155000	156000	Chr5	157000	158000	3000	3.47712	51	1.19614e-18	8.66521e-14	155000	157000	157000	158000	97	1	AT5G01380	AT5G01380,AT5G01390,AT5G01400
Chr5	1933000	1934000	Chr5	1935000	1936000	3000	3.47712	90	1.11748e-08	4.8265e-05	1933000	1935000	1935000	1936000	165	1	AT5G06320	AT5G06330,AT5G06340
Chr5	24276000	24277000	Chr5	24278000	24279000	3000	3.47712	39	1.14931e-05	0.0120587	24276000	24277000	24277000	24279000	85	1	AT5G60300,AT5G60310,AT5G60320,AT5G60330,AT5G60335,AT5G60340	AT5G60350,AT5G60360,AT5G60370,AT5G60380,AT5G60390
Chr5	1536000	1537000	Chr5	1538000	1539000	3000	3.47712	33	2.09421e-09	1.16837e-05	1536000	1537000	1537000	1539000	78	1	AT5G05180	AT5G05180,AT5G05190,AT5G05200,AT5G05210
Chr5	8523000	8524000	Chr5	8525000	8526000	3000	3.47712	64	1.52429e-06	0.00251658	8523000	8524000	8525000	8527000	113	1	AT5G24810,AT5G24820	AT5G24820,AT5G24825,AT5G24830
Chr5	23836000	23837000	Chr5	23838000	23839000	3000	3.47712	20	9.39345e-08	0.000274694	23836000	23837000	23837000	23839000	64	1	AT5G59020,AT5G59030,AT5G59040	AT5G59050
Chr5	13768000	13769000	Chr5	13770000	13771000	3000	3.47712	76	2.11586e-06	0.0032508	13768000	13769000	13770000	13772000	130	1	AT5G35590	AT5G35600
Chr5	4148000	4149000	Chr5	4150000	4151000	3000	3.47712	111	2.70352e-13	5.17049e-09	4148000	4149000	4150000	4152000	173	1	AT5G13070	AT5G13080
Chr5	928000	929000	Chr5	930000	931000	3000	3.47712	211	1.3912e-11	1.61448e-07	927000	929000	930000	931000	316	1	AT5G03630,AT5G03640	AT5G03640,AT5G03650
Chr5	22963000	22964000	Chr5	22965000	22966000	3000	3.47712	192	6.06575e-18	3.91918e-13	22963000	22964000	22964000	22966000	329	1	AT5G56740,AT5G56745,AT5G56750,AT5G56760,AT5G56770	AT5G56780,AT5G56790,AT5G56795,AT5G56800,AT5G56810
Chr5	24068000	24069000	Chr5	24070000	24071000	3000	3.47712	86	1.92891e-08	7.6094e-05	24068000	24070000	24070000	24072000	110	0.5	NA	AT5G59740,AT5G59750
Chr5	18108000	18109000	Chr5	18110000	18111000	3000	3.47712	111	1.24449e-09	7.50345e-06	18108000	18109000	18109000	18111000	235	1	AT5G44840,AT5G44850	AT5G44860
Chr5	618000	619000	Chr5	620000	621000	3000	3.47712	121	8.53618e-08	0.000253344	617000	619000	620000	621000	203	1	AT5G02740	AT5G02750
Chr5	18991000	18992000	Chr5	18993000	18994000	3000	3.47712	54	7.37706e-08	0.000225882	18991000	18992000	18993000	18994000	54	1	AT5G46790,AT5G46795,AT5G46800,AT5G46810	AT5G46810,AT5G46820
Chr5	22187000	22188000	Chr5	22189000	22190000	3000	3.47712	46	5.45425e-06	0.00673854	22187000	22188000	22189000	22190000	46	1	AT5G54620	AT5G54620
Chr5	6636000	6637000	Chr5	6638000	6639000	3000	3.47712	96	7.03142e-07	0.00137109	6636000	6637000	6638000	6639000	96	1	AT5G19620,AT5G19630,AT5G19640	AT5G19640,AT5G19650,AT5G19660,AT5G19670
Chr5	18165000	18166000	Chr5	18167000	18168000	3000	3.47712	69	1.0604e-05	0.0113297	18165000	18166000	18167000	18168000	69	1	AT5G44960,AT5G44970,AT5G44973,AT5G44980,AT5G44990,AT5G45000	AT5G45000,AT5G45010,AT5G45020,AT5G45030,AT5G45040
Chr5	445000	446000	Chr5	447000	448000	3000	3.47712	20	5.87612e-05	0.0403493	445000	446000	447000	448000	20	1	AT5G02190,AT5G02200,AT5G02210,AT5G02220	AT5G02230,AT5G02240
Chr5	1509000	1510000	Chr5	1511000	1512000	3000	3.47712	144	9.90542e-10	6.22344e-06	1509000	1510000	1511000	1512000	144	1	AT5G05090,AT5G05100,AT5G05110,AT5G05113	AT5G05120
Chr5	3169000	3170000	Chr5	3171000	3172000	3000	3.47712	72	6.61899e-05	0.0440952	3169000	3170000	3171000	3172000	72	1	AT5G10120	AT5G10120,AT5G10130
Chr5	13770000	13771000	Chr5	13772000	13773000	3000	3.47712	86	1.26203e-05	0.0129266	13770000	13771000	13772000	13773000	86	1	AT5G35600	NA
Chr5	7813000	7814000	Chr5	7815000	7816000	3000	3.47712	48	5.46056e-05	0.038254	7813000	7814000	7815000	7816000	48	1	AT5G23210	AT5G23210,AT5G23212,AT5G23220
Chr5	26284000	26285000	Chr5	26286000	26287000	3000	3.47712	67	2.76028e-07	0.000651412	26284000	26285000	26286000	26287000	67	1	AT5G65700	NA
Chr5	22814000	22815000	Chr5	22816000	22817000	3000	3.47712	89	2.15382e-05	0.0193317	22814000	22815000	22816000	22817000	89	1	AT5G56330	AT5G56330,AT5G56340,AT5G56350
Chr5	15743000	15744000	Chr5	15745000	15746000	3000	3.47712	84	4.71282e-08	0.000156807	15743000	15744000	15745000	15746000	84	1	AT5G39320	AT5G39330,AT5G39340
Chr5	4279000	4280000	Chr5	4281000	4282000	3000	3.47712	131	8.50759e-10	5.49916e-06	4279000	4280000	4281000	4282000	131	1	AT5G13340,AT5G13350	AT5G13350
Chr5	22710000	22711000	Chr5	22712000	22713000	3000	3.47712	89	9.0632e-07	0.00166796	22710000	22711000	22712000	22713000	89	1	AT5G56075	AT5G56080
Chr5	21318000	21319000	Chr5	21320000	21321000	3000	3.47712	119	3.28926e-09	1.72254e-05	21318000	21319000	21320000	21321000	119	1	AT5G52530	AT5G52530,AT5G52540,AT5G52545,AT5G52547,AT5G52550,AT5G52552
Chr5	22653000	22654000	Chr5	22655000	22656000	3000	3.47712	125	9.23322e-09	4.11813e-05	22653000	22654000	22655000	22656000	125	1	AT5G55930	AT5G55930,AT5G55940
Chr5	6724000	6725000	Chr5	6726000	6727000	3000	3.47712	72	1.17669e-10	1.02665e-06	6724000	6725000	6726000	6727000	72	1	AT5G19890	AT5G19900,AT5G19910,AT5G19920
Chr5	7368000	7369000	Chr5	7370000	7371000	3000	3.47712	144	2.66438e-06	0.00389574	7368000	7369000	7370000	7371000	144	1	AT5G22240,AT5G22250,AT5G22260	AT5G22260,AT5G22270,AT5G22280,AT5G22290,AT5G22300
Chr5	1364000	1365000	Chr5	1366000	1367000	3000	3.47712	72	1.02818e-06	0.00185439	1364000	1365000	1366000	1367000	72	1	AT5G04730	AT5G04730
Chr5	23065000	23066000	Chr5	23067000	23068000	3000	3.47712	18	4.22179e-05	0.031609	23065000	23066000	23067000	23068000	18	1	AT5G57000	AT5G57010,AT5G57015,AT5G57020,AT5G57030
Chr5	23852000	23853000	Chr5	23854000	23855000	3000	3.47712	80	5.50467e-08	0.000178315	23852000	23853000	23854000	23855000	80	1	AT5G59090	AT5G59090
Chr5	9039000	9040000	Chr5	9041000	9042000	3000	3.47712	54	2.14854e-07	0.000535316	9039000	9040000	9041000	9042000	54	1	AT5G25900,AT5G25910	AT5G25910
Chr5	8688000	8689000	Chr5	8690000	8691000	3000	3.47712	32	5.97422e-05	0.0408654	8688000	8689000	8690000	8691000	32	1	AT5G25160	NA
Chr5	25006000	25007000	Chr5	25008000	25009000	3000	3.47712	59	4.58818e-06	0.00587973	25006000	25007000	25008000	25009000	59	1	AT5G62240,AT5G62250	AT5G62250,AT5G62260,AT5G62270,AT5G62280
Chr5	5761000	5762000	Chr5	5763000	5764000	3000	3.47712	26	2.04394e-05	0.0186239	5761000	5762000	5763000	5764000	26	1	AT5G17470	AT5G17480,AT5G17490
Chr5	8664000	8665000	Chr5	8666000	8667000	3000	3.47712	53	4.76229e-05	0.034531	8664000	8665000	8666000	8667000	53	1	AT5G25120	AT5G25130
Chr5	17773000	17774000	Chr5	17775000	17776000	3000	3.47712	76	3.11785e-07	0.000718422	17773000	17774000	17775000	17776000	76	1	AT5G44160	AT5G44160
Chr5	3315000	3316000	Chr5	3317000	3318000	3000	3.47712	39	1.21202e-05	0.0125487	3315000	3316000	3317000	3318000	39	1	AT5G10500,AT5G10504,AT5G10510	AT5G10510,AT5G10520,AT5G10525,AT5G10530
Chr5	9072000	9073000	Chr5	9074000	9075000	3000	3.47712	74	4.93988e-06	0.00623537	9072000	9073000	9074000	9075000	74	1	AT5G25980	AT5G25980
Chr5	22485000	22486000	Chr5	22487000	22488000	3000	3.47712	49	1.36733e-05	0.0137836	22485000	22486000	22487000	22488000	49	1	AT5G55507,AT5G55508	AT5G55510,AT5G55520,AT5G55530
Chr5	26121000	26122000	Chr5	26123000	26124000	3000	3.47712	32	3.19831e-07	0.000731684	26121000	26122000	26123000	26124000	32	1	AT5G65350,AT5G65360,AT5G65370	AT5G65380
Chr5	2585000	2586000	Chr5	2587000	2588000	3000	3.47712	88	7.2217e-06	0.00839097	2585000	2586000	2587000	2588000	88	1	AT5G08070	AT5G08075
Chr5	45000	46000	Chr5	47000	48000	3000	3.47712	72	1.11198e-06	0.00196623	45000	46000	47000	48000	72	1	AT5G01110,AT5G01120	AT5G01120,AT5G01130
Chr5	21777000	21778000	Chr5	21779000	21780000	3000	3.47712	84	5.77176e-08	0.000184378	21777000	21778000	21779000	21780000	84	1	AT5G53600	AT5G53610
Chr5	8662000	8663000	Chr5	8664000	8665000	3000	3.47712	33	4.72867e-05	0.0343288	8662000	8663000	8664000	8665000	33	1	AT5G25120	AT5G25120
Chr5	18389000	18390000	Chr5	18391000	18392000	3000	3.47712	33	7.33847e-05	0.0474728	18389000	18390000	18391000	18392000	33	1	AT5G45370	AT5G45380
Chr5	8401000	8402000	Chr5	8403000	8404000	3000	3.47712	80	4.84776e-06	0.00614975	8401000	8402000	8403000	8404000	80	1	NA	AT5G24560,AT5G24570
Chr5	14048000	14049000	Chr5	14050000	14051000	3000	3.47712	96	5.94733e-07	0.0012021	14048000	14049000	14050000	14051000	96	1	NA	AT5G35917
Chr5	2196000	2197000	Chr5	2198000	2199000	3000	3.47712	56	1.25712e-07	0.000349048	2196000	2197000	2198000	2199000	56	1	AT5G07070	AT5G07070
Chr5	17614000	17615000	Chr5	17616000	17617000	3000	3.47712	108	4.51337e-08	0.000151363	17614000	17615000	17616000	17617000	108	1	AT5G43810	AT5G43810,AT5G43822,AT5G43820
Chr5	25485000	25486000	Chr5	25487000	25488000	3000	3.47712	47	1.49114e-06	0.00247295	25485000	25486000	25487000	25488000	47	1	AT5G63630,AT5G63640,AT5G63650,AT5G63660	AT5G63670,AT5G63680,AT5G63690,AT5G63700
Chr5	5166000	5167000	Chr5	5168000	5169000	3000	3.47712	60	7.3357e-07	0.00141484	5166000	5167000	5168000	5169000	60	1	NA	AT5G15830,AT5G15833,AT5G15840,AT5G15845,AT5G15850,AT5G15853,AT5G15860
Chr5	10651000	10652000	Chr5	10653000	10654000	3000	3.47712	33	1.57987e-06	0.00258943	10651000	10652000	10653000	10654000	33	1	AT5G28640	AT5G28642
Chr5	26286000	26287000	Chr5	26288000	26289000	3000	3.47712	34	1.05066e-05	0.0112567	26286000	26287000	26288000	26289000	34	1	NA	AT5G65710
Chr5	21034000	21035000	Chr5	21036000	21037000	3000	3.47712	50	9.19981e-08	0.000269857	21034000	21035000	21036000	21037000	50	1	AT5G51760,AT5G51770,AT5G51780	AT5G51780
Chr5	21888000	21889000	Chr5	21890000	21891000	3000	3.47712	51	6.13831e-05	0.0417542	21888000	21889000	21890000	21891000	51	1	AT5G53895,AT5G53900,AT5G53902,AT5G53905	AT5G53910,AT5G53920
Chr5	1292000	1293000	Chr5	1294000	1295000	3000	3.47712	74	4.0128e-15	1.20668e-10	1292000	1293000	1294000	1295000	74	1	AT5G04520,AT5G04530	NA
Chr5	22572000	22573000	Chr5	22574000	22575000	3000	3.47712	132	2.01332e-05	0.0184198	22572000	22573000	22574000	22575000	132	1	AT5G55760,AT5G55770	NA
Chr5	4380000	4381000	Chr5	4382000	4383000	3000	3.47712	75	1.62481e-07	0.000425898	4380000	4381000	4382000	4383000	75	1	AT5G13570,AT5G13580,AT5G13590,AT5G13600	AT5G13600,AT5G13610,AT5G13620,AT5G13630
Chr5	123000	124000	Chr5	125000	126000	3000	3.47712	122	2.70887e-08	9.93998e-05	123000	124000	125000	126000	122	1	AT5G01300	AT5G01310
Chr5	23748000	23749000	Chr5	23750000	23751000	3000	3.47712	87	6.71806e-05	0.0446308	23748000	23749000	23750000	23751000	87	1	AT5G58790,AT5G58800	AT5G58820,AT5G58830
Chr5	5230000	5231000	Chr5	5232000	5233000	3000	3.47712	84	3.36338e-10	2.51269e-06	5230000	5231000	5232000	5233000	84	1	AT5G16020	AT5G16020,AT5G16023
Chr5	76000	77000	Chr5	78000	79000	3000	3.47712	16	2.9332e-06	0.00416865	76000	77000	78000	79000	16	1	NA	AT5G01200,AT5G01215,AT5G01210,AT5G01220
Chr5	2387000	2388000	Chr5	2389000	2390000	3000	3.47712	114	1.87379e-06	0.00295972	2387000	2388000	2389000	2390000	114	1	AT5G07540	AT5G07550,AT5G07560
Chr5	25308000	25309000	Chr5	25310000	25311000	3000	3.47712	54	2.99841e-05	0.0245021	25308000	25309000	25310000	25311000	54	1	AT5G63090	AT5G63090
Chr5	21801000	21802000	Chr5	21803000	21804000	3000	3.47712	69	3.88715e-05	0.0297605	21801000	21802000	21803000	21804000	69	1	AT5G53670,AT5G53680,AT5G53690,AT5G53700	AT5G53710,AT5G53720,AT5G53730
Chr5	16600000	16601000	Chr5	16602000	16603000	3000	3.47712	209	9.84871e-07	0.00178571	16600000	16601000	16602000	16603000	209	1	AT5G41471,AT5G41490	NA
Chr5	25941000	25942000	Chr5	25943000	25944000	3000	3.47712	69	3.54332e-11	3.65908e-07	25941000	25942000	25943000	25944000	69	1	AT5G64910	AT5G64910,AT5G64920,AT5G64930,AT5G64940,AT5G64950
Chr5	24769000	24770000	Chr5	24771000	24772000	3000	3.47712	28	3.95302e-05	0.0301073	24769000	24770000	24771000	24772000	28	1	AT5G61605	AT5G61610
Chr5	3281000	3282000	Chr5	3283000	3284000	3000	3.47712	29	1.74535e-05	0.0165674	3281000	3282000	3283000	3284000	29	1	AT5G10440	AT5G10450
Chr5	16152000	16153000	Chr5	16154000	16155000	3000	3.47712	108	2.89133e-06	0.0041217	16152000	16153000	16154000	16155000	108	1	AT5G40370,AT5G40380	AT5G40380,AT5G40382
Chr5	1567000	1568000	Chr5	1569000	1570000	3000	3.47712	108	2.28878e-07	0.000562926	1567000	1568000	1569000	1570000	108	1	AT5G05280,AT5G05282	AT5G05290,AT5G05300,AT5G05310
Chr5	423000	424000	Chr5	425000	426000	3000	3.47712	32	1.19526e-05	0.0124101	423000	424000	425000	426000	32	1	AT5G02130,AT5G02140	AT5G02150,AT5G02160,AT5G02170,AT5G02180
Chr5	21655000	21656000	Chr5	21657000	21658000	3000	3.47712	121	3.20872e-05	0.0257801	21655000	21656000	21657000	21658000	121	1	AT5G53350,AT5G53360,AT5G53370,AT5G53380	AT5G53390
Chr5	21404000	21405000	Chr5	21406000	21407000	3000	3.47712	52	1.85179e-06	0.00293564	21404000	21405000	21406000	21407000	52	1	AT5G52820	NA
Chr5	3882000	3883000	Chr5	3884000	3885000	3000	3.47712	76	1.20803e-05	0.0125194	3882000	3883000	3884000	3885000	76	1	AT5G12020	AT5G12030,AT5G12040
Chr5	19429000	19430000	Chr5	19431000	19432000	3000	3.47712	135	4.50573e-05	0.0332352	19429000	19430000	19431000	19432000	135	1	AT5G47970,AT5G47980	NA
Chr5	1884000	1885000	Chr5	1886000	1887000	3000	3.47712	180	4.28835e-06	0.00559446	1884000	1885000	1886000	1887000	180	1	AT5G06220,AT5G06230	AT5G06230,AT5G06240
Chr5	5206000	5207000	Chr5	5208000	5209000	3000	3.47712	46	4.92232e-06	0.00622287	5206000	5207000	5208000	5209000	46	1	AT5G15920,AT5G15930,AT5G15940,AT5G15950,AT5G15948	AT5G15950,AT5G15948
Chr5	15379000	15380000	Chr5	15381000	15382000	3000	3.47712	35	6.08055e-05	0.0414245	15379000	15380000	15381000	15382000	35	1	NA	AT5G38420
Chr5	23049000	23050000	Chr5	23051000	23052000	3000	3.47712	28	2.83016e-05	0.0234955	23049000	23050000	23051000	23052000	28	1	NA	NA
Chr5	14643000	14644000	Chr5	14645000	14646000	3000	3.47712	175	3.35266e-10	2.5086e-06	14643000	14644000	14645000	14646000	175	1	AT5G37020,AT5G37030,AT5G37040,AT5G37050,AT5G37055,AT5G37060	AT5G37060,AT5G37070
Chr5	5818000	5819000	Chr5	5820000	5821000	3000	3.47712	72	2.94251e-07	0.000685745	5818000	5819000	5820000	5821000	72	1	AT5G17620,AT5G17630,AT5G17640,AT5G17650,AT5G17660	AT5G17660,AT5G17670,AT5G17680
Chr5	2474000	2475000	Chr5	2476000	2477000	3000	3.47712	73	3.71843e-05	0.0288148	2474000	2475000	2476000	2477000	73	1	AT5G07770	AT5G07770
Chr5	9299000	9300000	Chr5	9301000	9302000	3000	3.47712	58	7.04891e-09	3.28807e-05	9299000	9300000	9301000	9302000	58	1	AT5G26740,AT5G26731	AT5G26730,AT5G26720,AT5G26710,AT5G26700
Chr5	26329000	26330000	Chr5	26331000	26332000	3000	3.47712	66	3.6906e-06	0.00497483	26329000	26330000	26331000	26332000	66	1	NA	AT5G65800
Chr5	16969000	16970000	Chr5	16971000	16972000	3000	3.47712	138	1.48729e-07	0.000397268	16969000	16970000	16971000	16972000	138	1	AT5G42405,AT5G42410,AT5G42420	AT5G42430
Chr5	2862000	2863000	Chr5	2864000	2865000	3000	3.47712	79	7.11057e-08	0.000219339	2862000	2863000	2864000	2865000	79	1	AT5G08790,AT5G09210	AT5G09210
Chr5	24703000	24704000	Chr5	24705000	24706000	3000	3.47712	22	3.19836e-07	0.000731684	24703000	24704000	24705000	24706000	22	1	NA	AT5G61440,AT5G61445,AT5G61450,AT5G61455
Chr5	9024000	9025000	Chr5	9026000	9027000	3000	3.47712	23	2.71938e-05	0.0228347	9024000	9025000	9026000	9027000	23	1	AT5G25880	AT5G25880
Chr5	16442000	16443000	Chr5	16444000	16445000	3000	3.47712	37	1.39164e-07	0.000377719	16442000	16443000	16444000	16445000	37	1	AT5G41070,AT5G41071,AT5G41080	NA
Chr5	26502000	26503000	Chr5	26504000	26505000	3000	3.47712	108	4.831e-08	0.000159739	26502000	26503000	26504000	26505000	108	1	AT5G66330,AT5G66340	AT5G66350
Chr5	4992000	4993000	Chr5	4994000	4995000	3000	3.47712	101	7.1564e-06	0.00832926	4992000	4993000	4994000	4995000	101	1	AT5G15350,AT5G15360,AT5G15380	AT5G15380,AT5G15390,AT5G15400
Chr5	17126000	17127000	Chr5	17128000	17129000	3000	3.47712	128	1.5486e-08	6.38129e-05	17126000	17127000	17128000	17129000	128	1	AT5G42690,AT5G42700,AT5G42710	AT5G42710,AT5G42720
Chr5	24699000	24700000	Chr5	24701000	24702000	3000	3.47712	45	2.80257e-06	0.00404095	24699000	24700000	24701000	24702000	45	1	NA	AT5G61430
Chr5	8672000	8673000	Chr5	8674000	8675000	3000	3.47712	21	3.80819e-05	0.0293309	8672000	8673000	8674000	8675000	21	1	AT5G25140	AT5G25140,AT5G25150
Chr5	8332000	8333000	Chr5	8334000	8335000	3000	3.47712	47	9.11409e-06	0.0100454	8332000	8333000	8334000	8335000	47	1	AT5G24390,AT5G24400,AT5G24410	AT5G24410
Chr5	3874000	3875000	Chr5	3876000	3877000	3000	3.47712	274	4.76517e-11	4.66385e-07	3874000	3875000	3876000	3877000	274	1	AT5G11980,AT5G11990,AT5G12000	AT5G12000,AT5G12010
Chr5	16244000	16245000	Chr5	16246000	16247000	3000	3.47712	74	1.48009e-05	0.0145881	16244000	16245000	16246000	16247000	74	1	AT5G40520,AT5G40530,AT5G40540,AT5G40545,AT5G40550,AT5G40560	AT5G40560,AT5G40570
Chr5	17179000	17180000	Chr5	17181000	17182000	3000	3.47712	93	1.07192e-05	0.0114273	17179000	17180000	17181000	17182000	93	1	AT5G42830,AT5G42840	AT5G42840,AT5G42850,AT5G42860,AT5G42870
Chr5	2262000	2263000	Chr5	2264000	2265000	3000	3.47712	62	4.58814e-05	0.0336355	2262000	2263000	2264000	2265000	62	1	NA	AT5G07220
Chr5	26299000	26300000	Chr5	26301000	26302000	3000	3.47712	37	5.17136e-05	0.0367801	26299000	26300000	26301000	26302000	37	1	AT5G65720,AT5G65730	AT5G65740,AT5G65750,AT5G65760
Chr5	24572000	24573000	Chr5	24574000	24575000	3000	3.47712	81	1.2286e-05	0.0126819	24572000	24573000	24574000	24575000	81	1	AT5G61030,AT5G61040,AT5G61050,AT5G61060,AT5G61070	AT5G61070,AT5G61090
Chr5	22703000	22704000	Chr5	22705000	22706000	3000	3.47712	52	4.83084e-06	0.00613479	22703000	22704000	22705000	22706000	52	1	NA	NA
Chr5	25850000	25851000	Chr5	25852000	25853000	3000	3.47712	37	1.32816e-05	0.0134797	25850000	25851000	25852000	25853000	37	1	AT5G64667	AT5G64670
Chr5	10030000	10031000	Chr5	10032000	10033000	3000	3.47712	77	3.77941e-05	0.0291833	10030000	10031000	10032000	10033000	77	1	AT5G28030	AT5G28030,AT5G28040
Chr5	17296000	17297000	Chr5	17298000	17299000	3000	3.47712	60	1.48243e-06	0.00246193	17296000	17297000	17298000	17299000	60	1	AT5G43080,AT5G43090	AT5G43090
Chr5	22007000	22008000	Chr5	22009000	22010000	3000	3.47712	117	2.33924e-06	0.00351936	22007000	22008000	22009000	22010000	117	1	NA	AT5G54210,AT5G54215,AT5G54220
Chr5	20415000	20416000	Chr5	20417000	20418000	3000	3.47712	40	3.37544e-05	0.0267865	20415000	20416000	20417000	20418000	40	1	AT5G50160	AT5G50160,AT5G50170
Chr5	23140000	23141000	Chr5	23142000	23143000	3000	3.47712	43	4.97806e-05	0.0357318	23140000	23141000	23142000	23143000	43	1	NA	NA
Chr5	2121000	2122000	Chr5	2123000	2124000	3000	3.47712	69	5.10136e-06	0.00639007	2121000	2122000	2123000	2124000	69	1	AT5G06820,AT5G06830,AT5G06839	AT5G06839
Chr5	8913000	8914000	Chr5	8915000	8916000	3000	3.47712	152	2.08364e-09	1.16384e-05	8913000	8914000	8915000	8916000	152	1	AT5G25570,AT5G25580,AT5G25585,AT5G25590,AT5G25600	AT5G25610
Chr5	3715000	3716000	Chr5	3717000	3718000	3000	3.47712	96	5.43363e-07	0.00111309	3715000	3716000	3717000	3718000	96	1	AT5G11560,AT5G11570	AT5G11570
Chr5	3690000	3691000	Chr5	3692000	3693000	3000	3.47712	26	7.3779e-06	0.00853446	3690000	3691000	3692000	3693000	26	1	NA	NA
Chr5	8385000	8386000	Chr5	8387000	8388000	3000	3.47712	55	1.04551e-05	0.0112233	8385000	8386000	8387000	8388000	55	1	AT5G24530,AT5G24540	AT5G24540
Chr5	18941000	18942000	Chr5	18943000	18944000	3000	3.47712	44	9.59946e-07	0.00174582	18941000	18942000	18943000	18944000	44	1	AT5G46680	NA
Chr5	19601000	19602000	Chr5	19603000	19604000	3000	3.47712	126	9.0744e-06	0.0100162	19601000	19602000	19603000	19604000	126	1	AT5G48340,AT5G48350,AT5G48360,AT5G48370,AT5G48375	AT5G48375,AT5G48380,AT5G48385,AT5G48390
Chr5	11614000	11615000	Chr5	11616000	11617000	3000	3.47712	38	4.65399e-05	0.0339747	11614000	11615000	11616000	11617000	38	1	AT5G30490	AT5G30500
Chr5	22005000	22006000	Chr5	22007000	22008000	3000	3.47712	34	5.56936e-05	0.0388115	22005000	22006000	22007000	22008000	34	1	NA	NA
Chr5	6442000	6443000	Chr5	6444000	6445000	3000	3.47712	63	2.56433e-05	0.0219402	6442000	6443000	6444000	6445000	63	1	NA	AT5G19170,AT5G19172,AT5G19175,AT5G19180
Chr5	24969000	24970000	Chr5	24971000	24972000	3000	3.47712	17	5.0435e-05	0.03611	24969000	24970000	24971000	24972000	17	1	NA	AT5G62170
Chr5	8172000	8173000	Chr5	8174000	8175000	3000	3.47712	24	3.71612e-05	0.0288052	8172000	8173000	8174000	8175000	24	1	AT5G24150	AT5G24150
Chr5	5652000	5653000	Chr5	5654000	5655000	3000	3.47712	94	7.00351e-07	0.00136844	5652000	5653000	5654000	5655000	94	1	AT5G17170,AT5G17180,AT5G17190	AT5G17200,AT5G17210,AT5G17220,AT5G17230,AT5G17233
Chr5	24190000	24191000	Chr5	24192000	24193000	3000	3.47712	84	3.70212e-05	0.0287167	24190000	24191000	24192000	24193000	84	1	AT5G60050,AT5G60060,AT5G60070	AT5G60070
Chr5	14941000	14942000	Chr5	14943000	14944000	3000	3.47712	84	3.09932e-05	0.0251395	14941000	14942000	14943000	14944000	84	1	AT5G37600,AT5G37610	AT5G37620,AT5G37630,AT5G37640
Chr5	22562000	22563000	Chr5	22564000	22565000	3000	3.47712	67	1.01354e-06	0.00183006	22562000	22563000	22564000	22565000	67	1	AT5G55730,AT5G55740	AT5G55740,AT5G55750
Chr5	9624000	9625000	Chr5	9626000	9627000	3000	3.47712	75	2.64527e-07	0.000630495	9624000	9625000	9626000	9627000	75	1	AT5G27300	AT5G27310
Chr5	3890000	3891000	Chr5	3892000	3893000	3000	3.47712	61	3.30858e-05	0.0263669	3890000	3891000	3892000	3893000	61	1	AT5G12043,AT5G12050	NA
Chr5	17588000	17589000	Chr5	17590000	17591000	3000	3.47712	77	2.15001e-05	0.0193083	17588000	17589000	17590000	17591000	77	1	AT5G43750,AT5G43755,AT5G43760,AT5G43770	AT5G43780
Chr5	7000000	7001000	Chr5	7002000	7003000	3000	3.47712	132	9.99596e-06	0.0108007	7000000	7001000	7002000	7003000	132	1	AT5G20680	AT5G20690
Chr5	98000	99000	Chr5	100000	101000	3000	3.47712	18	6.37201e-06	0.00759567	98000	99000	100000	101000	18	1	AT5G01225,AT5G01230,AT5G01240	AT5G01240,AT5G01250,AT5G01260
Chr5	9425000	9426000	Chr5	9427000	9428000	3000	3.47712	63	1.73951e-05	0.0165303	9425000	9426000	9427000	9428000	63	1	AT5G26780,AT5G26790,AT5G26800	AT5G26805
Chr5	3571000	3572000	Chr5	3573000	3574000	3000	3.47712	177	9.37548e-10	5.96098e-06	3571000	3572000	3573000	3574000	177	1	AT5G11200,AT5G11210	AT5G11210
Chr5	20211000	20212000	Chr5	20213000	20214000	3000	3.47712	110	2.98723e-07	0.000693336	20211000	20212000	20213000	20214000	110	1	AT5G49750	AT5G49750
Chr5	25892000	25893000	Chr5	25894000	25895000	3000	3.47712	30	6.80167e-05	0.0450236	25892000	25893000	25894000	25895000	30	1	AT5G64750	AT5G64760
Chr5	4063000	4064000	Chr5	4065000	4066000	3000	3.47712	67	3.5143e-06	0.00477759	4063000	4064000	4065000	4066000	67	1	AT5G12860,AT5G12870	NA
Chr5	22989000	22990000	Chr5	22991000	22992000	3000	3.47712	52	3.79027e-05	0.0292389	22989000	22990000	22991000	22992000	52	1	AT5G56860	AT5G56860,AT5G56865
Chr5	2103000	2104000	Chr5	2105000	2106000	3000	3.47712	61	5.55146e-05	0.0387377	2103000	2104000	2105000	2106000	61	1	AT5G06800	AT5G06800
Chr5	9613000	9614000	Chr5	9615000	9616000	3000	3.47712	25	3.6087e-05	0.0281585	9613000	9614000	9615000	9616000	25	1	AT5G27260,AT5G27270	AT5G27280
Chr5	26803000	26804000	Chr5	26805000	26806000	3000	3.47712	26	4.55041e-06	0.00584701	26803000	26804000	26805000	26806000	26	1	AT5G67180	AT5G67190,AT5G67200
Chr5	24960000	24961000	Chr5	24962000	24963000	3000	3.47712	69	5.89417e-15	1.72893e-10	24960000	24961000	24962000	24963000	69	1	AT5G62140,AT5G62150,AT5G62160	AT5G62162
Chr5	19565000	19566000	Chr5	19567000	19568000	3000	3.47712	93	3.84791e-05	0.02955	19565000	19566000	19567000	19568000	93	1	AT5G48240,AT5G48250,AT5G48270	AT5G48280,AT5G48290,AT5G48300,AT5G48310
Chr5	3850000	3851000	Chr5	3852000	3853000	3000	3.47712	340	7.14999e-15	2.0594e-10	3850000	3851000	3852000	3853000	340	1	AT5G11940	AT5G11940,AT5G11950
Chr5	23632000	23633000	Chr5	23634000	23635000	3000	3.47712	101	5.41753e-05	0.0380529	23632000	23633000	23634000	23635000	101	1	AT5G58450,AT5G58460	AT5G58460
Chr5	25227000	25228000	Chr5	25229000	25230000	3000	3.47712	56	9.94828e-07	0.00180103	25227000	25228000	25229000	25230000	56	1	NA	AT5G62840,AT5G62850,AT5G62848
Chr5	4643000	4644000	Chr5	4645000	4646000	3000	3.47712	59	6.56838e-09	3.10327e-05	4643000	4644000	4645000	4646000	59	1	AT5G14380,AT5G14390,AT5G14400	AT5G14400
Chr5	20820000	20821000	Chr5	20822000	20823000	3000	3.47712	141	9.18359e-06	0.0101127	20820000	20821000	20822000	20823000	141	1	AT5G51200,AT5G51210	AT5G51220,AT5G51230
Chr5	16177000	16178000	Chr5	16179000	16180000	3000	3.47712	52	7.06522e-05	0.0462242	16177000	16178000	16179000	16180000	52	1	AT5G40410,AT5G40420,AT5G40430	NA
Chr5	22553000	22554000	Chr5	22555000	22556000	3000	3.47712	95	1.89506e-07	0.00048324	22553000	22554000	22555000	22556000	95	1	AT5G55670,AT5G55680,AT5G55690,AT5G55700	AT5G55710,AT5G55720
Chr5	23645000	23646000	Chr5	23647000	23648000	3000	3.47712	71	2.06013e-05	0.0187189	23645000	23646000	23647000	23648000	71	1	AT5G58480,AT5G58490,AT5G58495,AT5G58500	NA
Chr5	7471000	7472000	Chr5	7473000	7474000	3000	3.47712	42	3.76443e-07	0.000835899	7471000	7472000	7473000	7474000	42	1	AT5G22500	AT5G22500
Chr5	6124000	6125000	Chr5	6126000	6127000	3000	3.47712	51	3.56279e-06	0.00483389	6124000	6125000	6126000	6127000	51	1	AT5G18460	AT5G18460,AT5G18470,AT5G18475,AT5G18480,AT5G18490
Chr5	325000	326000	Chr5	327000	328000	3000	3.47712	25	1.50834e-05	0.0148025	325000	326000	327000	328000	25	1	AT5G01840	NA
Chr5	21105000	21106000	Chr5	21107000	21108000	3000	3.47712	104	1.39662e-06	0.00234714	21105000	21106000	21107000	21108000	104	1	AT5G51920,AT5G51930,AT5G51940,AT5G51950	AT5G51950,AT5G51960,AT5G51970,AT5G51980
Chr5	2558000	2559000	Chr5	2560000	2561000	3000	3.47712	40	7.8611e-09	3.58987e-05	2558000	2559000	2560000	2561000	40	1	AT5G07970,AT5G07980	AT5G07990
Chr5	1024000	1025000	Chr5	1026000	1027000	3000	3.47712	33	2.54896e-05	0.0218514	1024000	1025000	1026000	1027000	33	1	AT5G03820,AT5G03830,AT5G03837,AT5G03840	NA
Chr5	18738000	18739000	Chr5	18740000	18741000	3000	3.47712	46	5.98913e-05	0.0409138	18738000	18739000	18740000	18741000	46	1	AT5G46200,AT5G46210,AT5G46220	AT5G46220,AT5G46230,AT5G46240
Chr5	15735000	15736000	Chr5	15737000	15738000	3000	3.47712	17	6.20797e-05	0.0420602	15735000	15736000	15737000	15738000	17	1	AT5G39280,AT5G39290	AT5G39300
Chr5	24078000	24079000	Chr5	24080000	24081000	3000	3.47712	53	4.20089e-07	0.00091215	24078000	24079000	24080000	24081000	53	1	AT5G59760	AT5G59770,AT5G59780
Chr5	14975000	14976000	Chr5	14977000	14978000	3000	3.47712	32	1.2388e-06	0.00214836	14975000	14976000	14977000	14978000	32	1	AT5G37667,AT5G37670,AT5G37680,AT5G37690	AT5G37710
Chr5	20456000	20457000	Chr5	20458000	20459000	3000	3.47712	105	1.69674e-05	0.0162187	20456000	20457000	20458000	20459000	105	1	AT5G50240,AT5G50250,AT5G50260	AT5G50270,AT5G50280,AT5G50290
Chr5	20656000	20657000	Chr5	20658000	20659000	3000	3.47712	115	2.2023e-06	0.00335449	20656000	20657000	20658000	20659000	115	1	AT5G50780,AT5G50790	AT5G50790
Chr5	15007000	15008000	Chr5	15009000	15010000	3000	3.47712	52	5.41583e-07	0.0011104	15007000	15008000	15009000	15010000	52	1	AT5G37770,AT5G37780	AT5G37790
Chr5	8028000	8029000	Chr5	8030000	8031000	3000	3.47712	55	7.62873e-05	0.0488285	8028000	8029000	8030000	8031000	55	1	AT5G23810	AT5G23810,AT5G23820
Chr5	18913000	18914000	Chr5	18915000	18916000	3000	3.47712	130	1.04817e-09	6.50011e-06	18913000	18914000	18915000	18916000	130	1	AT5G46610	AT5G46610,AT5G46620
Chr5	3092000	3093000	Chr5	3094000	3095000	3000	3.47712	92	7.62025e-07	0.0014536	3092000	3093000	3094000	3095000	92	1	AT5G09900	AT5G09910,AT5G09920
Chr5	4272000	4273000	Chr5	4274000	4275000	3000	3.47712	56	5.37425e-07	0.00110329	4272000	4273000	4274000	4275000	56	1	AT5G13300,AT5G13310,AT5G13320,AT5G13330	AT5G13330
Chr5	8419000	8420000	Chr5	8421000	8422000	3000	3.47712	48	2.53233e-08	9.48138e-05	8419000	8420000	8421000	8422000	48	1	AT5G24590,AT5G24593	AT5G24600
Chr5	13955000	13956000	Chr5	13957000	13958000	3000	3.47712	133	6.4591e-06	0.00768033	13955000	13956000	13957000	13958000	133	1	NA	AT5G35790
Chr5	17344000	17345000	Chr5	17346000	17347000	3000	3.47712	55	1.73719e-06	0.00278444	17344000	17345000	17346000	17347000	55	1	NA	AT5G43200,AT5G43210,AT5G43211,AT5G43230,AT5G43240,AT5G43245,AT5G43250
Chr5	17145000	17146000	Chr5	17147000	17148000	3000	3.47712	49	5.821e-05	0.040086	17145000	17146000	17147000	17148000	49	1	AT5G42740,AT5G42750	AT5G42760,AT5G42765,AT5G42770,AT5G42780
Chr5	18095000	18096000	Chr5	18097000	18098000	3000	3.47712	34	8.46443e-06	0.00950684	18095000	18096000	18097000	18098000	34	1	AT5G44800,AT5G44820	AT5G44820,AT5G44830
Chr5	7407000	7408000	Chr5	7409000	7410000	3000	3.47712	108	2.21537e-07	0.000549105	7407000	7408000	7409000	7410000	108	1	AT5G22370	AT5G22380
Chr5	8034000	8035000	Chr5	8036000	8037000	3000	3.47712	74	1.40741e-08	5.89738e-05	8034000	8035000	8036000	8037000	74	1	AT5G23830	AT5G23840,AT5G23850,AT5G23860
Chr5	892000	893000	Chr5	894000	895000	3000	3.47712	46	2.58668e-05	0.022085	892000	893000	894000	895000	46	1	AT5G03540	AT5G03540,AT5G03545
Chr5	17652000	17653000	Chr5	17654000	17655000	3000	3.47712	21	7.27592e-05	0.0472279	17652000	17653000	17654000	17655000	21	1	NA	AT5G43900
Chr5	1186000	1187000	Chr5	1188000	1189000	3000	3.47712	68	1.25115e-08	5.29854e-05	1186000	1187000	1188000	1189000	68	1	AT5G04250,AT5G04260,AT5G04267,AT5G04270	AT5G04275,AT5G04280,AT5G04290
Chr1	28844000	28845000	Chr1	28847000	28848000	4000	3.60206	46	2.3251e-06	0.0035036	28843000	28845000	28845000	28848000	147	0.5	AT1G76810,AT1G76820,AT1G76830	AT1G76840,AT1G76850
Chr1	23186000	23187000	Chr1	23189000	23190000	4000	3.60206	60	3.19383e-08	0.000114386	23186000	23188000	23188000	23190000	223	0.5	AT1G62580,AT1G62590,AT1G62600,AT1G62610,AT1G62620,AT1G62630	AT1G62640,AT1G62660
Chr1	19927000	19928000	Chr1	19930000	19931000	4000	3.60206	90	5.85902e-08	0.000186632	19926000	19928000	19930000	19932000	145	0.5	AT1G53390,AT1G53400,AT1G53410,AT1G53420	AT1G53420,AT1G53430
Chr1	21351000	21352000	Chr1	21354000	21355000	4000	3.60206	62	1.90286e-06	0.00299871	21351000	21352000	21353000	21355000	184	1	AT1G57650	AT1G57650,AT1G57660,AT1G57670
Chr1	855000	856000	Chr1	858000	859000	4000	3.60206	105	2.43151e-11	2.62431e-07	855000	856000	858000	860000	188	1	AT1G03410,AT1G03430,AT1G03440,AT1G03445	AT1G03445
Chr1	39000	40000	Chr1	42000	43000	4000	3.60206	30	3.33015e-06	0.00458196	39000	40000	42000	44000	63	1	AT1G01060,AT1G01070	AT1G01073,AT1G01080,AT1G01090
Chr1	241000	242000	Chr1	244000	245000	4000	3.60206	90	2.71465e-06	0.00395113	240000	242000	244000	246000	142	0.5	AT1G01660	AT1G01670,AT1G01680,AT1G01690,AT1G01695
Chr1	17203000	17204000	Chr1	17206000	17207000	4000	3.60206	69	6.7208e-06	0.00792451	17202000	17204000	17206000	17207000	98	1	AT1G45688,AT1G45976	NA
Chr1	24762000	24763000	Chr1	24765000	24766000	4000	3.60206	39	4.65348e-06	0.00595065	24762000	24763000	24765000	24766000	39	1	AT1G66380	AT1G66390,AT1G66400,AT1G66410
Chr1	25267000	25268000	Chr1	25270000	25271000	4000	3.60206	125	3.3432e-05	0.0265924	25267000	25268000	25270000	25271000	125	1	AT1G67430,AT1G67440,AT1G67450,AT1G67455	AT1G67460,AT1G67470,AT1G67480,AT1G67481,AT1G67490
Chr1	17941000	17942000	Chr1	17944000	17945000	4000	3.60206	100	7.21595e-07	0.00139765	17941000	17942000	17944000	17945000	100	1	AT1G48500,AT1G48510,AT1G48520	AT1G48530,AT1G48540,AT1G48550,AT1G48560
Chr1	4936000	4937000	Chr1	4939000	4940000	4000	3.60206	90	1.25586e-05	0.0128798	4936000	4937000	4939000	4940000	90	1	AT1G14430	AT1G14440,AT1G14450,AT1G14455,AT1G14460
Chr1	12709000	12710000	Chr1	12712000	12713000	4000	3.60206	110	6.12246e-05	0.0416748	12709000	12710000	12712000	12713000	110	1	AT1G34670	NA
Chr1	5310000	5311000	Chr1	5313000	5314000	4000	3.60206	71	4.2296e-06	0.00553444	5310000	5311000	5313000	5314000	71	1	AT1G15410,AT1G15415,AT1G15420,AT1G15430,AT1G15440,AT1G15450,AT1G15460	AT1G15460,AT1G15470,AT1G15480,AT1G15490
Chr1	11579000	11580000	Chr1	11582000	11583000	4000	3.60206	79	2.98118e-05	0.0244197	11579000	11580000	11582000	11583000	79	1	AT1G32170,AT1G32172	AT1G32180,AT1G32190
Chr1	25760000	25761000	Chr1	25763000	25764000	4000	3.60206	70	6.75502e-07	0.00132857	25760000	25761000	25763000	25764000	70	1	AT1G68570,AT1G68580,AT1G68585,AT1G68590,AT1G68600	AT1G68610
Chr1	9841000	9842000	Chr1	9844000	9845000	4000	3.60206	128	4.95086e-05	0.0356121	9841000	9842000	9844000	9845000	128	1	AT1G28140,AT1G28150,AT1G28160,AT1G28170	AT1G28180,AT1G28190,AT1G28200,AT1G28210
Chr1	3869000	3870000	Chr1	3872000	3873000	4000	3.60206	153	5.55899e-05	0.0387675	3869000	3870000	3872000	3873000	153	1	AT1G11480,AT1G11490	AT1G11500,AT1G11510,AT1G11520,AT1G11530,AT1G11540,AT1G11545,AT1G11550,AT1G11560
Chr1	12160000	12161000	Chr1	12163000	12164000	4000	3.60206	140	5.92408e-05	0.0406029	12160000	12161000	12163000	12164000	140	1	AT1G33530	AT1G33540
Chr1	23797000	23798000	Chr1	23800000	23801000	4000	3.60206	129	2.09261e-08	8.16095e-05	23797000	23798000	23800000	23801000	129	1	AT1G64090,AT1G64100,AT1G64105,AT1G64107,AT1G64110	AT1G64110,AT1G64120,AT1G64130,AT1G64140,AT1G64142,AT1G64150
Chr1	12153000	12154000	Chr1	12156000	12157000	4000	3.60206	142	3.85418e-10	2.82203e-06	12153000	12154000	12156000	12157000	142	1	AT1G33470,AT1G33475,AT1G33480,AT1G33490,AT1G33500	AT1G33520
Chr1	13042000	13043000	Chr1	13045000	13046000	4000	3.60206	29	6.15452e-05	0.0418404	13042000	13043000	13045000	13046000	29	1	AT1G35460,AT1G35461	NA
Chr1	6476000	6477000	Chr1	6479000	6480000	4000	3.60206	80	2.90935e-05	0.0239627	6476000	6477000	6479000	6480000	80	1	AT1G18745,AT1G18750,AT1G18760,AT1G18770,AT1G18773,AT1G18780	AT1G18790,AT1G18800,AT1G18810,AT1G18820,AT1G18830
Chr1	8757000	8758000	Chr1	8760000	8761000	4000	3.60206	71	2.06228e-05	0.0187316	8757000	8758000	8760000	8761000	71	1	AT1G24706,AT1G24735	AT1G24764
Chr1	26113000	26114000	Chr1	26116000	26117000	4000	3.60206	87	4.48936e-07	0.000953144	26113000	26114000	26116000	26117000	87	1	AT1G69440,AT1G69450,AT1G69460,AT1G69470	AT1G69480,AT1G69485,AT1G69490,AT1G69500,AT1G69510
Chr1	25302000	25303000	Chr1	25305000	25306000	4000	3.60206	47	5.6966e-05	0.0393882	25302000	25303000	25305000	25306000	47	1	AT1G67500,AT1G67510,AT1G67520	AT1G67520,AT1G67530,AT1G67540,AT1G67550
Chr1	8734000	8735000	Chr1	8737000	8738000	4000	3.60206	51	3.15267e-06	0.00441459	8734000	8735000	8737000	8738000	51	1	AT1G24650	AT1G24650
Chr1	6905000	6906000	Chr1	6908000	6909000	4000	3.60206	135	1.33013e-05	0.0134899	6905000	6906000	6908000	6909000	135	1	AT1G19870,AT1G19880,AT1G19890	AT1G19900
Chr1	5084000	5085000	Chr1	5087000	5088000	4000	3.60206	88	2.25391e-07	0.000555611	5084000	5085000	5087000	5088000	88	1	AT1G14730,AT1G14740,AT1G14750,AT1G14755,AT1G14760	AT1G14770,AT1G14780,AT1G14790
Chr1	26198000	26199000	Chr1	26201000	26202000	4000	3.60206	79	8.90315e-07	0.00164366	26198000	26199000	26201000	26202000	79	1	AT1G69610,AT1G69620,AT1G69630,AT1G69640,AT1G69650	AT1G69660,AT1G69670
Chr1	22771000	22772000	Chr1	22774000	22775000	4000	3.60206	75	1.22546e-05	0.0126577	22771000	22772000	22774000	22775000	75	1	AT1G61667,AT1G61670	AT1G61680
Chr1	28286000	28287000	Chr1	28289000	28290000	4000	3.60206	24	1.83826e-05	0.0171992	28286000	28287000	28289000	28290000	24	1	AT1G75370,AT1G75380	NA
Chr1	11903000	11904000	Chr1	11906000	11907000	4000	3.60206	97	2.39791e-11	2.60331e-07	11903000	11904000	11906000	11907000	97	1	AT1G32850	AT1G32850,AT1G32860,AT1G32870,AT1G32880
Chr1	22789000	22790000	Chr1	22792000	22793000	4000	3.60206	113	4.03441e-06	0.00533598	22789000	22790000	22792000	22793000	113	1	AT1G61710	AT1G61720,AT1G61730,AT1G61732,AT1G61740
Chr1	21924000	21925000	Chr1	21927000	21928000	4000	3.60206	15	1.23945e-05	0.0127581	21924000	21925000	21927000	21928000	15	1	AT1G59650,AT1G59660	AT1G59660
Chr1	17760000	17761000	Chr1	17763000	17764000	4000	3.60206	77	3.95532e-06	0.00525317	17760000	17761000	17763000	17764000	77	1	AT1G48090,AT1G48095	AT1G48100,AT1G48110,AT1G48120
Chr1	23308000	23309000	Chr1	23311000	23312000	4000	3.60206	108	3.21621e-05	0.0258304	23308000	23309000	23311000	23312000	108	1	AT1G62900,AT1G62910,AT1G62914,AT1G62920,AT1G62930,AT1G62935	AT1G62940,AT1G62950,AT1G62960
Chr1	29605000	29606000	Chr1	29608000	29609000	4000	3.60206	108	4.85391e-06	0.00615429	29605000	29606000	29608000	29609000	108	1	AT1G78680,AT1G78690,AT1G78700,AT1G78710,AT1G78720	AT1G78730,AT1G78740,AT1G78750,AT1G78760,AT1G78770
Chr1	24495000	24496000	Chr1	24498000	24499000	4000	3.60206	94	4.07738e-06	0.005372	24495000	24496000	24498000	24499000	94	1	AT1G65820,AT1G65830,AT1G65840,AT1G65845,AT1G65850	AT1G65850,AT1G65860
Chr1	26227000	26228000	Chr1	26230000	26231000	4000	3.60206	68	5.23387e-05	0.0370898	26227000	26228000	26230000	26231000	68	1	AT1G69720	AT1G69730,AT1G69740,AT1G69750,AT1G69760
Chr1	27642000	27643000	Chr1	27645000	27646000	4000	3.60206	51	6.9765e-06	0.00815361	27642000	27643000	27645000	27646000	51	1	AT1G73480,AT1G73490,AT1G73500,AT1G73510	AT1G73530,AT1G73540,AT1G73550
Chr1	25684000	25685000	Chr1	25687000	25688000	4000	3.60206	70	2.0778e-05	0.0188469	25684000	25685000	25687000	25688000	70	1	AT1G68480	NA
Chr1	11728000	11729000	Chr1	11731000	11732000	4000	3.60206	31	7.65063e-05	0.0489163	11728000	11729000	11731000	11732000	31	1	NA	NA
Chr1	2424000	2425000	Chr1	2427000	2428000	4000	3.60206	55	6.04291e-05	0.0412047	2424000	2425000	2427000	2428000	55	1	AT1G07795,AT1G07810,AT1G07820,AT1G07830,AT1G07840	AT1G07850,AT1G07870,AT1G07860
Chr1	12762000	12763000	Chr1	12765000	12766000	4000	3.60206	27	1.47232e-06	0.00245024	12762000	12763000	12765000	12766000	27	1	NA	AT1G34790,AT1G34792,AT1G34795,AT1G34800
Chr1	25768000	25769000	Chr1	25771000	25772000	4000	3.60206	44	1.12997e-05	0.0118897	25768000	25769000	25771000	25772000	44	1	AT1G68620,AT1G68630	AT1G68640,AT1G68650,AT1G68660
Chr1	7818000	7819000	Chr1	7821000	7822000	4000	3.60206	77	1.99713e-10	1.62671e-06	7818000	7819000	7821000	7822000	77	1	AT1G22120,AT1G22130,AT1G22140,AT1G22150	AT1G22150,AT1G22160,AT1G22170,AT1G22180
Chr1	21607000	21608000	Chr1	21610000	21611000	4000	3.60206	48	9.77165e-09	4.31402e-05	21607000	21608000	21610000	21611000	48	1	AT1G58260	AT1G58265,AT1G58270,AT1G58280
Chr1	22986000	22987000	Chr1	22989000	22990000	4000	3.60206	107	5.81863e-05	0.040086	22986000	22987000	22989000	22990000	107	1	AT1G62210	AT1G62220,AT1G62225,AT1G62240,AT1G62250,AT1G62260
Chr1	163000	164000	Chr1	166000	167000	4000	3.60206	67	2.13358e-05	0.019204	163000	164000	166000	167000	67	1	AT1G01410,AT1G01420,AT1G01430,AT1G01440,AT1G01448,AT1G01450	AT1G01448,AT1G01453,AT1G01460
Chr1	12512000	12513000	Chr1	12515000	12516000	4000	3.60206	57	6.61911e-06	0.00783193	12512000	12513000	12515000	12516000	57	1	AT1G34300,AT1G34310	AT1G34315,AT1G34320
Chr1	15082000	15083000	Chr1	15085000	15086000	4000	3.60206	167	1.81328e-10	1.49737e-06	15082000	15083000	15085000	15086000	167	1	AT1G40104	AT1G40104
Chr1	20408000	20409000	Chr1	20411000	20412000	4000	3.60206	46	6.92223e-05	0.0455819	20408000	20409000	20411000	20412000	46	1	AT1G54620,AT1G54630,AT1G54640,AT1G54650	AT1G54670,AT1G54680,AT1G54690,AT1G54700,AT1G54710
Chr1	8317000	8318000	Chr1	8320000	8321000	4000	3.60206	108	1.81273e-06	0.00288557	8317000	8318000	8320000	8321000	108	1	AT1G23420	AT1G23440,AT1G23450,AT1G23460,AT1G23465
Chr2	3335000	3336000	Chr2	3338000	3339000	4000	3.60206	27	1.12533e-13	2.37146e-09	3331000	3336000	3337000	3339000	111	0.7	AT2G07689	AT2G07691
Chr2	3497000	3498000	Chr2	3500000	3501000	4000	3.60206	12	4.00408e-08	0.000137631	3497000	3501000	3500000	3502000	40	0.625	AT2G07765	NA
Chr2	18807000	18808000	Chr2	18810000	18811000	4000	3.60206	69	2.43862e-09	1.32046e-05	18807000	18810000	18809000	18811000	260	0.666667	AT2G45660	AT2G45660,AT2G45670,AT2G45680,AT2G45685
Chr2	19459000	19460000	Chr2	19462000	19463000	4000	3.60206	103	5.50642e-07	0.00112387	19458000	19460000	19462000	19464000	252	0.75	AT2G47430	AT2G47430
Chr2	3483000	3484000	Chr2	3486000	3487000	4000	3.60206	10	2.98808e-08	0.000107965	3482000	3484000	3486000	3489000	22	0.5	AT2G07775	AT2G07806
Chr2	19345000	19346000	Chr2	19348000	19349000	4000	3.60206	103	2.53025e-08	9.481e-05	19345000	19347000	19348000	19349000	209	1	AT2G47070,AT2G47090,AT2G47100,AT2G47110,AT2G47115	AT2G47120,AT2G47130,AT2G47140,AT2G47150
Chr2	13297000	13298000	Chr2	13300000	13301000	4000	3.60206	73	1.34013e-06	0.00227943	13296000	13298000	13300000	13301000	113	1	AT2G31180,AT2G31190,AT2G31200,AT2G31210	AT2G31215,AT2G31218
Chr2	7584000	7585000	Chr2	7587000	7588000	4000	3.60206	67	2.15141e-08	8.35619e-05	7584000	7585000	7586000	7588000	110	1	AT2G17470	AT2G17470
Chr2	12841000	12842000	Chr2	12844000	12845000	4000	3.60206	35	6.89782e-06	0.00808538	12840000	12842000	12844000	12845000	74	1	AT2G30070,AT2G30080	AT2G30090,AT2G30100,AT2G30105,AT2G30110
Chr2	16384000	16385000	Chr2	16387000	16388000	4000	3.60206	114	5.16698e-06	0.00646042	16383000	16385000	16386000	16388000	213	0.5	AT2G39220,AT2G39230,AT2G39240	AT2G39240,AT2G39250,AT2G39260
Chr2	5855000	5856000	Chr2	5858000	5859000	4000	3.60206	120	2.53846e-05	0.0217979	5855000	5856000	5858000	5859000	120	1	NA	AT2G13950,AT2G13960
Chr2	1724000	1725000	Chr2	1727000	1728000	4000	3.60206	60	1.22135e-05	0.0126262	1724000	1725000	1727000	1728000	60	1	AT2G04865,AT2G04870,AT2G04880,AT2G04890,AT2G04900,AT2G04910	AT2G04920,AT2G04925
Chr2	6318000	6319000	Chr2	6321000	6322000	4000	3.60206	25	7.06088e-06	0.00823412	6318000	6319000	6321000	6322000	25	1	AT2G14740,AT2G14750	AT2G14760
[truncated: 3,418 more rows]
