# Supplementary material for: Polycomb-dependent differential chromatin compartmentalization determines gene coregulation in Arabidopsis
Source: HighWire-hosted journal article supplement (doi:10.1101/gr.273771.120), 2021-06-03
Supplement: Supplemental_Table_S5.xlsx [file Supplemental_Table_S5.xlsx]

## Sheet: S5
Supplementary Table S5: Genes spanning the H3K27me3 loops
AT1G72440
AT1G72450
AT1G72460
AT1G62440
AT1G80950
AT1G80960
AT1G80970
AT1G80980
AT1G80990
AT1G69830
AT1G69840
AT1G69850
AT1G18270
AT1G18280
AT1G18290
AT1G18300
AT1G18310
AT1G22570
AT1G03590
AT1G03600
AT1G03610
AT1G03620
AT1G53815
AT1G53820
AT1G53830
AT1G31620
AT1G32650
AT1G32660
AT1G70020
AT1G58602
AT1G75600
AT1G75620
AT1G80840
AT1G68526
AT1G68530
AT1G18840
AT1G18850
AT1G18860
AT1G21050
AT1G59740
AT1G30840
AT1G11200
AT1G11210
AT1G11220
AT1G11230
AT1G01220
AT1G01225
AT1G01230
AT1G01240
AT1G01250
AT1G62520
AT1G62530
AT1G21900
AT1G21910
AT1G64600
AT1G64610
AT1G64618
AT1G64620
AT1G42540
AT1G42550
AT1G42560
AT1G54200
AT1G22290
AT1G22300
AT1G22310
AT1G22320
AT1G22330
AT1G61270
AT1G01100
AT1G01110
AT1G01115
AT1G01120
AT1G19140
AT1G19150
AT1G19160
AT1G19170
AT1G19180
AT1G14510
AT1G14518
AT1G14520
AT1G14530
AT1G14540
AT1G01350
AT1G01355
AT1G51310
AT1G51320
AT1G51330
AT1G37130
AT1G50650
AT1G78390
AT1G78400
AT1G49190
AT1G49200
AT1G49210
AT1G72970
AT1G72980
AT1G72990
AT1G73000
AT1G73010
AT1G69880
AT1G77620
AT1G77630
AT1G77640
AT1G77650
AT1G77655
AT1G02405
AT1G02410
AT1G02420
AT1G02430
AT1G02440
AT1G73590
AT1G44810
AT1G44820
AT1G44830
AT1G71890
AT1G19370
AT1G19371
AT1G19373
AT1G19376
AT1G19380
AT1G19390
AT1G02680
AT1G07880
AT1G07885
AT1G07890
AT1G13260
AT1G56570
AT1G56580
AT1G56590
AT1G56600
AT1G02780
AT1G02790
AT1G02800
AT1G02810
AT1G17410
AT1G17420
AT1G25380
AT1G25390
AT1G25400
AT1G25410
AT1G12010
AT1G12013
AT1G12015
AT1G12020
AT1G12030
AT1G09210
AT1G09220
AT1G09230
AT1G09240
AT1G52890
AT1G79160
AT1G68500
AT1G68510
AT1G68520
AT1G32850
AT1G74650
AT1G74660
AT1G13670
AT1G13680
AT1G03445
AT1G69210
AT1G69220
AT1G69230
AT1G69240
AT1G76030
AT1G76040
AT1G76050
AT1G76060
AT1G76065
AT1G76062
AT1G76070
AT1G62150
AT1G62160
AT1G62170
AT1G62180
AT1G62181
AT1G62190
AT1G49430
AT1G49435
AT1G49450
AT1G78300
AT1G78310
AT1G78320
AT1G34750
AT1G34760
AT1G30350
AT1G69870
AT1G69860
AT1G58150
AT1G58160
AT1G57650
AT1G78250
AT1G78260
AT1G78270
AT1G78265
AT1G76135
AT1G07650
AT1G07645
AT1G69160
AT1G12360
AT1G12370
AT1G53700
AT1G55615
AT1G55620
AT1G55625
AT1G55630
AT1G55640
AT1G24095
AT1G24100
AT1G24110
AT1G24120
AT1G24130
AT1G78780
AT1G78790
AT1G78800
AT1G78810
AT1G78815
AT1G12110
AT1G20640
AT1G20650
AT1G15520
AT1G15530
AT1G15540
AT1G45000
AT1G45010
AT1G34550
AT1G34560
AT1G34570
AT1G34575
AT1G62280
AT1G62290
AT1G62300
AT1G32900
AT1G32910
AT1G14390
AT1G14400
AT1G14410
AT1G14420
AT1G67238
AT1G67250
AT1G67260
AT1G14430
AT1G68100
AT1G68110
AT1G68120
AT1G68130
AT1G67785
AT1G67790
AT1G67792
AT1G67800
AT1G67810
AT1G69800
AT1G69810
AT1G01550
AT1G01560
AT1G01570
AT1G01580
AT1G70700
AT1G70710
AT1G07040
AT1G07050
AT1G07051
AT1G07060
AT1G07070
AT1G07080
AT1G07090
AT1G77765
AT1G77770
AT1G77780
AT1G77790
AT1G22770
AT1G22780
AT1G22790
AT1G22800
AT1G59790
AT1G59800
AT1G59810
AT1G12560
AT1G12570
AT1G12580
AT1G12590
AT1G12600
AT1G70070
AT1G70080
AT1G17360
AT1G17370
AT1G17380
AT1G01480
AT1G76920
AT1G01470
AT1G01471
AT1G62700
AT1G62710
AT1G61310
AT1G61320
AT1G02030
AT1G02040
AT1G02050
AT1G02060
AT1G02065
AT1G04510
AT1G04520
AT1G04530
AT1G04540
AT1G18335
AT1G18340
AT1G18350
AT1G15290
AT1G15310
AT1G15320
AT1G15330
AT1G79220
AT1G79230
AT1G79240
AT1G79250
AT1G65930
AT1G20680
AT1G20690
AT1G20691
AT1G56230
AT1G56233
AT1G56240
AT1G56242
AT1G58430
AT1G58440
AT1G58450
AT1G32770
AT1G22360
AT1G80790
AT1G80810
AT1G80820
AT1G19190
AT1G69570
AT1G69572
AT1G69580
AT1G02610
AT1G02620
AT1G61850
AT1G61860
AT1G61870
AT1G61880
AT1G61890
AT1G75690
AT1G75700
AT1G75710
AT1G75717
AT1G69690
AT1G80750
AT1G80760
AT1G12400
AT1G12410
AT1G12411
AT1G12420
AT1G12423
AT1G53330
AT1G53340
AT1G53345
AT1G53350
AT1G53360
AT1G02650
AT1G02660
AT2G07792
AT2G07806
AT2G45620
AT2G45630
AT2G45640
AT2G45650
AT2G45430
AT2G21510
AT2G19720
AT2G19730
AT2G19740
AT2G19750
AT2G19760
AT2G19770
AT2G46560
AT2G46567
AT2G46570
AT2G46572
AT2G46580
AT2G46590
AT2G22807
AT2G22810
AT2G03730
AT2G03740
AT2G22770
AT2G03310
AT2G03320
AT2G03330
AT2G45940
AT2G45950
AT2G45960
AT2G45970
AT2G38185
AT2G38195
AT2G38210
AT2G38220
AT2G38230
AT2G01913
AT2G01918
AT2G01920
AT2G01930
AT2G01940
AT2G07687
AT2G32090
AT2G32100
AT2G32110
AT2G32120
AT2G32130
AT2G32140
AT2G15390
AT2G46150
AT2G41410
AT2G41415
AT2G41060
AT2G41070
AT2G41080
AT2G41082
AT2G41090
AT2G41100
AT2G25430
AT2G25440
AT2G23510
AT2G36310
AT2G36320
AT2G36325
AT2G21650
AT2G21655
AT2G21660
AT2G21670
AT2G21680
AT2G04675
AT2G04680
AT2G30925
AT2G30930
AT2G30933
AT2G30940
AT2G22310
AT2G22320
AT2G22330
AT2G46685
AT2G46690
AT2G27690
AT2G30840
AT2G23620
AT2G44340
AT2G32400
AT2G32410
AT2G32415
AT2G19790
AT2G19796
AT2G19800
AT2G41250
AT2G41260
AT2G18720
AT2G32250
AT2G32260
AT2G36110
AT2G03480
AT2G03490
AT2G03500
AT2G43410
AT2G43420
AT2G43430
AT2G43440
AT2G29430
AT2G29440
AT2G16800
AT2G16810
AT2G16835
AT2G07698
AT2G07667
AT2G22900
AT2G47990
AT2G48000
AT2G48010
AT2G48020
AT2G48030
AT2G21120
AT2G21130
AT2G21140
AT2G41630
AT2G41640
AT2G41650
AT2G47480
AT2G47485
AT2G28340
AT2G03710
AT2G29250
AT2G35670
AT2G35680
AT2G35690
AT2G01570
AT2G47920
AT2G47930
AT2G47940
AT2G47950
AT2G35970
AT2G35980
AT2G43890
AT2G43900
AT2G43910
AT2G42340
AT2G42350
AT2G42360
AT2G42365
AT2G42370
AT2G42380
AT2G29220
AT2G46710
AT2G46720
AT2G47275
AT2G47280
AT2G34680
AT2G34690
AT2G01660
AT2G41830
AT2G41835
AT2G41840
AT2G41850
AT2G23060
AT2G23067
AT2G16340
AT2G16365
AT2G16360
AT2G15110
AT2G15128
AT2G15130
AT2G28640
AT2G28650
AT2G03010
AT2G46930
AT2G46940
AT2G46950
AT2G46960
AT2G46970
AT2G43080
AT2G43090
AT2G43100
AT2G03550
AT2G03560
AT2G32010
AT2G32020
AT2G32030
AT2G44490
AT2G34050
AT2G34060
AT2G34070
AT2G34110
AT2G34080
AT2G40380
AT2G40390
AT2G28510
AT2G01610
AT2G22490
AT2G22496
AT2G22500
AT2G46640
AT2G02070
AT2G47320
AT2G47330
AT2G47340
AT2G43120
AT2G43130
AT2G43140
AT2G07779
AT2G07743
AT2G07672
AT2G07684
AT2G46620
AT2G34580
AT2G34585
AT2G34590
AT2G34600
AT2G34610
AT2G23670
AT2G23672
AT2G23680
AT2G34440
AT2G34450
AT2G34460
AT2G34470
AT2G34480
AT2G34490
AT2G40140
AT2G40150
AT2G40160
AT2G40170
AT2G40180
AT2G36080
AT2G31340
AT2G31345
AT2G31350
AT2G31360
AT2G36950
AT2G41220
AT2G37570
AT2G37580
AT2G37585
AT2G37590
AT2G47510
AT2G47520
AT2G47530
AT2G47540
AT2G39705
AT2G39710
AT2G23760
AT2G44290
AT2G44300
AT2G44304
AT2G44310
AT2G44320
AT2G44330
AT2G47270
AT2G21188
AT2G21190
AT2G21195
AT2G21200
AT2G21210
AT2G01410
AT2G01420
AT2G01422
AT2G18540
AT2G02850
AT2G02860
AT2G02740
AT2G02750
AT2G02741
AT2G02760
AT2G02770
AT2G38320
AT2G39960
AT2G39970
AT2G39980
AT2G39975
AT2G36090
AT2G41120
AT2G41130
AT2G02960
AT2G02970
AT2G02980
AT2G02990
AT2G03350
AT2G03360
AT2G24570
AT2G46662
AT2G46280
AT2G46290
AT2G46300
AT2G40630
AT2G40640
AT2G40650
AT2G40660
AT2G40670
AT2G16700
AT2G47160
AT2G22750
AT2G22760
AT2G27775
AT2G27780
AT2G04100
AT2G07681
AT2G07778
AT2G39140
AT2G39160
AT2G39170
AT2G41770
AT2G41780
AT2G41790
AT2G41800
AT2G35910
AT2G35920
AT2G35930
AT3G55740
AT3G55750
AT3G55760
AT3G55770
AT3G55780
AT3G61028
AT3G61030
AT3G61035
AT3G61040
AT3G62550
AT3G62560
AT3G62570
AT3G60120
AT3G02130
AT3G02140
AT3G02150
AT3G61970
AT3G61850
AT3G24480
AT3G03680
AT3G54940
AT3G62907
AT3G62910
AT3G62920
AT3G62930
AT3G62940
AT3G62950
AT3G53530
AT3G53540
AT3G53550
AT3G26935
AT3G26940
AT3G11710
AT3G11720
AT3G11730
AT3G11740
AT3G27906
AT3G27910
AT3G15820
AT3G15830
AT3G30720
AT3G30725
AT3G60510
AT3G60520
AT3G27750
AT3G27770
AT3G27785
AT3G27070
AT3G27080
AT3G27090
AT3G29034
AT3G29035
AT3G29040
AT3G50630
AT3G50640
AT3G05858
AT3G50880
AT3G50890
AT3G50895
AT3G22240
AT3G22250
AT3G22920
AT3G63170
AT3G63180
AT3G63190
AT3G63200
AT3G57120
AT3G57130
AT3G08630
AT3G08636
AT3G08640
AT3G08650
AT3G08660
AT3G19160
AT3G16940
AT3G16950
AT3G16960
AT3G07350
AT3G02230
AT3G02240
AT3G14810
AT3G14820
AT3G12130
AT3G12140
AT3G59060
AT3G59068
AT3G59070
AT3G28223
AT3G28230
AT3G50380
AT3G50390
AT3G13525
AT3G13530
AT3G13540
AT3G04500
AT3G04510
AT3G04520
AT3G04525
AT3G04530
AT3G44290
AT3G28910
AT3G15640
AT3G15650
AT3G15660
AT3G15670
AT3G51180
AT3G51190
AT3G06490
AT3G22968
AT3G22970
AT3G23250
AT3G54020
AT3G54030
AT3G54040
AT3G23610
AT3G23620
AT3G23630
AT3G16230
AT3G16240
AT3G15540
AT3G23030
AT3G27150
AT3G10970
AT3G10974
AT3G10980
AT3G10985
AT3G10986
AT3G08760
AT3G08762
AT3G56320
AT3G56330
AT3G56340
AT3G56350
AT3G50740
AT3G57530
AT3G57540
AT3G27160
AT3G11580
AT3G25710
AT3G48720
AT3G22820
AT3G22830
AT3G47530
AT3G47540
AT3G47543
AT3G47550
AT3G47560
AT3G47570
AT3G18770
AT3G18773
AT3G01250
AT3G01260
AT3G01270
AT3G28180
AT3G28190
AT3G52930
AT3G52940
AT3G52941
AT3G52950
AT3G52955
AT3G63080
AT3G63088
AT3G63090
AT3G63095
AT3G63110
AT3G16190
AT3G16200
AT3G17998
AT3G18000
AT3G18010
AT3G18020
AT3G32036
AT3G32040
AT3G56040
AT3G56050
AT3G56060
AT3G58590
AT3G58600
AT3G58610
AT3G49590
AT3G49600
AT3G49601
AT3G49610
AT3G04070
AT3G22600
AT3G22620
AT3G22630
AT3G22640
AT3G09350
AT3G09360
AT3G09370
AT3G27220
AT3G27230
AT3G27240
AT3G27250
AT3G04030
AT3G04040
AT3G04050
AT3G04060
AT3G61510
AT3G06019
AT3G06020
AT3G06030
AT3G06035
AT3G13960
AT3G25600
AT3G25610
AT3G25620
AT3G23290
AT3G55880
AT3G55890
AT3G52450
AT3G05340
AT3G05350
AT3G05360
AT3G05370
AT3G62800
AT3G62810
AT3G62820
AT3G62830
AT3G62840
AT3G62850
AT3G59420
AT3G59430
AT3G59440
AT3G12977
AT3G48515
AT3G48520
AT3G04400
AT3G04410
AT3G04420
AT3G48610
AT3G48620
AT3G48630
AT3G48640
AT3G21860
AT3G43420
AT3G43430
AT3G57660
AT3G57670
AT3G16110
AT3G16117
AT3G16120
AT3G16130
AT3G16140
AT3G16150
AT3G22400
AT3G23633
AT3G23635
AT3G46080
AT3G13790
AT3G12150
AT3G12160
AT3G09470
AT3G09480
AT3G09490
AT3G09500
AT3G09505
AT3G09510
AT3G09520
AT3G48070
AT3G48080
AT3G48090
AT3G48100
AT3G52765
AT3G52770
AT3G52780
AT3G52790
AT3G15220
AT3G15240
AT3G27950
AT3G27960
AT3G27968
AT3G27970
AT3G03240
AT3G03250
AT3G03260
AT3G60590
AT3G17100
AT3G61890
AT3G61897
AT3G61898
AT3G23170
AT3G23171
AT3G15030
AT3G15040
AT3G15050
AT3G62320
AT3G62330
AT3G62336
AT3G62340
AT3G61560
AT3G61570
AT3G61571
AT3G61580
AT3G15500
AT3G15510
AT3G50590
AT3G50610
AT3G50620
AT3G15530
AT3G15534
AT3G49800
AT3G49810
AT3G49820
AT3G49830
AT3G02180
AT3G02190
AT3G02200
AT3G02210
AT3G02220
AT3G57150
AT3G57157
AT3G57160
AT3G20640
AT3G51670
AT3G51680
AT3G51870
AT3G51880
AT3G51890
AT3G51895
AT3G21790
AT3G21800
AT3G14680
AT3G14690
AT3G14700
AT3G14710
AT3G58100
AT3G58110
AT3G58120
AT3G10770
AT3G10780
AT3G18990
AT3G19000
AT3G22840
AT3G51150
AT3G51160
AT3G51171
AT3G57500
AT3G57510
AT3G15690
AT3G15700
AT3G10720
AT3G10730
AT3G10740
AT3G10745
AT3G10750
AT3G07400
AT3G07410
AT3G07420
AT3G50660
AT3G26680
AT3G26690
AT3G26700
AT3G26710
AT3G51490
AT3G51500
AT3G51510
AT3G51520
AT3G51530
AT3G51540
AT3G23430
AT3G57470
AT3G12900
AT3G12910
AT3G10300
AT3G21540
AT3G21550
AT3G21560
AT3G22886
AT3G16490
AT3G56400
AT3G29670
AT3G29680
AT3G01800
AT3G01810
AT3G01820
AT3G01830
AT3G01840
AT3G03450
AT3G03456
AT3G03460
AT3G03470
AT3G03480
AT3G12970
AT3G47350
AT3G47360
AT3G47370
AT3G47380
AT3G61340
AT3G02590
AT3G02600
AT3G02610
AT3G44430
AT3G44440
AT3G44444
AT3G44450
AT3G62860
AT3G22104
AT3G22110
AT3G22120
AT3G22121
AT3G26180
AT3G26190
AT3G14850
AT3G14855
AT3G14860
AT3G14870
AT3G14880
AT3G23060
AT3G26200
AT3G47600
AT3G45780
AT3G14360
AT3G14362
AT3G14370
AT3G18827
AT3G18830
AT3G18240
AT3G18250
AT3G18260
AT3G18270
AT3G18280
AT3G17840
AT3G17845
AT3G17850
AT3G56260
AT3G56270
AT3G13980
AT3G53760
AT3G53770
AT3G53775
AT3G53780
AT3G53790
AT4G00160
AT4G39650
AT4G01350
AT4G36880
AT4G35110
AT4G35120
AT4G16990
AT4G00710
AT4G00720
AT4G00730
AT4G39940
AT4G08910
AT4G18710
AT4G18720
AT4G27320
AT4G27330
AT4G05330
AT4G05340
AT4G09180
AT4G09190
AT4G36720
AT4G36730
AT4G37770
AT4G01940
AT4G01950
AT4G02180
AT4G05310
AT4G12030
AT4G12040
AT4G12050
AT4G34250
AT4G37650
AT4G39050
AT4G39060
AT4G39070
AT4G37390
AT4G37780
AT4G12110
AT4G12115
AT4G12120
AT4G33890
AT4G33900
AT4G17505
AT4G17510
AT4G27240
AT4G27250
AT4G37400
AT4G13240
AT4G23850
AT4G23860
AT4G23870
AT4G23880
AT4G02670
AT4G34230
AT4G12430
AT4G12432
AT4G17790
AT4G17800
AT4G18600
AT4G18610
AT4G24060
AT4G01680
AT4G37850
AT4G01720
AT4G17910
AT4G17920
AT4G30460
AT4G16550
AT4G25470
AT4G25480
AT4G38620
AT4G03610
AT4G01160
AT4G01170
AT4G00120
AT4G21430
AT4G21440
AT4G27950
AT4G27960
AT4G27970
AT4G36790
AT4G36791
AT4G36800
AT4G36808
AT4G36810
AT4G36820
AT4G30320
AT4G30330
AT4G30340
AT4G37540
AT4G33000
AT4G33010
AT4G33020
AT4G20370
AT4G38390
AT4G38400
AT4G38401
AT4G38405
AT4G38410
AT4G38420
AT4G18690
AT4G29330
AT4G29340
AT4G36195
AT4G36197
AT4G36210
AT4G36220
AT4G00080
AT4G08870
AT4G37430
AT4G37432
AT4G26255
AT4G26260
AT4G26270
AT4G26280
AT4G27830
AT4G27840
AT4G22130
AT4G22140
AT4G22150
AT4G22160
AT4G22165
AT4G21940
AT4G06744
AT4G05110
AT4G31780
AT4G31790
AT4G30570
AT4G30580
AT4G30590
AT4G23980
AT4G23990
AT4G24000
AT4G08730
AT4G08740
AT4G34370
AT4G34380
AT4G36370
AT4G36380
AT4G04830
AT4G35900
AT4G17453
AT4G17460
AT4G23000
AT4G23010
AT4G23020
AT4G28840
AT4G28850
AT4G14730
AT4G13266
AT4G39550
AT4G39560
AT4G39570
AT4G39580
AT4G39590
AT4G32880
AT4G39660
AT4G39670
AT4G09570
AT4G34980
AT4G34990
AT4G25770
AT4G25780
AT4G29750
AT4G29760
AT4G29770
AT4G18900
AT4G33920
AT4G33925
AT4G18340
AT4G18350
AT4G39361
AT4G36920
AT4G34800
AT4G21970
AT4G39710
AT4G17860
AT4G22010
AT4G35670
AT4G35680
AT4G17690
AT4G13190
AT4G16580
AT4G16590
AT4G16600
AT4G16630
AT4G16640
AT4G03290
AT4G03292
AT4G03295
AT4G03298
AT4G05490
AT4G14620
AT4G14622
AT4G14630
AT4G02210
AT4G02220
AT4G02230
AT4G21200
AT4G26190
AT4G26200
AT4G02320
AT4G00300
AT4G14930
AT4G14940
AT4G21910
AT4G12545
AT4G12550
AT4G25820
AT4G29100
AT4G29230
AT4G10767
AT4G10770
AT4G10780
AT4G21745
AT4G21750
AT4G02840
AT4G02850
AT4G02860
AT4G02870
AT4G02871
AT4G39350
AT4G35090
AT4G32850
AT4G32860
AT4G32870
AT4G30270
AT4G30280
AT4G22785
AT4G22790
AT4G22800
AT4G22810
AT4G19420
AT4G22600
AT4G25650
AT4G25660
AT4G25670
AT4G25672
AT4G25680
AT4G25692
AT4G25690
AT4G05170
AT4G33040
AT4G01340
AT4G36110
AT4G33090
AT4G33100
AT4G33110
AT4G33120
AT4G01100
AT4G01110
AT4G01120
AT4G01130
AT4G37190
AT4G37200
AT4G37210
AT4G37220
AT4G08360
AT4G22690
AT4G36350
AT4G34710
AT4G02780
AT4G30130
AT4G30140
AT4G39610
AT4G13554
AT4G13555
AT4G13560
AT4G13570
AT4G13564
AT4G13572
AT4G39720
AT4G00305
AT4G34410
AT4G34412
AT4G31540
AT4G14240
AT4G14250
AT4G14251
AT4G14260
AT4G15755
AT4G15760
AT4G15765
AT4G10190
AT4G30064
AT4G30067
AT4G30070
AT4G39950
AT4G15890
AT4G15900
AT4G15910
AT4G15920
AT4G24050
AT4G16250
AT4G16260
AT4G20800
AT4G12240
AT4G12250
AT4G12270
AT4G17670
AT4G26780
AT4G26795
AT4G26790
AT4G26800
AT4G26810
AT4G26820
AT4G26830
AT4G36640
AT4G36648
AT4G36650
AT4G36660
AT4G36670
AT4G18150
AT4G18160
AT4G18170
AT4G21850
AT4G19340
AT4G19350
AT4G19360
AT4G19370
AT4G19380
AT4G18520
AT4G18530
AT4G18540
AT4G18550
AT4G03540
AT4G38825
AT4G38820
AT4G38830
AT4G38840
AT4G38850
AT4G13160
AT4G13170
AT4G13180
AT4G14465
AT4G34450
AT4G34460
AT4G37810
AT4G37870
AT4G25130
AT4G25140
AT4G28330
AT4G28340
AT4G28350
AT4G28360
AT4G28362
AT4G28365
AT4G39675
AT4G34200
AT4G34210
AT4G34215
AT4G23170
AT4G23180
AT4G23190
AT4G23205
AT4G23200
AT4G25030
AT4G25040
AT4G33160
AT4G33170
AT4G33180
AT4G34040
AT4G34050
AT4G34060
AT4G00210
AT4G37409
AT4G37410
AT4G18660
AT4G21880
AT4G21890
AT4G21895
AT4G28720
AT4G16820
AT4G19020
AT4G19030
AT4G13075
AT4G30220
AT4G30230
AT4G36870
AT4G08560
AT4G36160
AT4G09740
AT4G09750
AT4G09760
AT4G09770
AT4G20920
AT4G20930
AT4G20940
AT4G25800
AT4G25810
AT4G14713
AT4G14716
AT4G14720
AT4G00360
AT4G37580
AT4G14590
AT4G11310
AT4G06534
AT4G29110
AT4G18860
AT4G18870
AT4G18880
AT4G18890
AT4G24020
AT4G24025
AT4G24030
AT4G24026
AT4G01630
AT4G01640
AT4G01650
AT4G01660
AT4G11320
AT4G39460
AT4G39470
AT4G39480
AT4G01450
AT4G32280
AT4G05090
AT4G05091
AT4G05095
AT4G05100
AT4G15950
AT4G15953
AT4G15955
AT4G15960
AT4G33670
AT4G33680
AT4G33690
AT4G33700
AT4G33710
AT4G35140
AT4G35150
AT5G01050
AT5G65770
AT5G65780
AT5G65790
AT5G01010
AT5G01015
AT5G01020
AT5G01030
AT5G01040
AT5G65310
AT5G65320
AT5G28295
AT5G44870
AT5G62500
AT5G62510
AT5G66860
AT5G66870
AT5G01060
AT5G65050
AT5G65060
AT5G65070
AT5G67411
AT5G62750
AT5G62760
AT5G56970
AT5G23250
AT5G23260
AT5G65170
AT5G61390
AT5G61400
AT5G61410
AT5G61412
AT5G61420
AT5G03470
AT5G03480
AT5G59350
AT5G59360
AT5G08130
AT5G56250
AT5G54450
AT5G54460
AT5G54470
AT5G54480
AT5G18120
AT5G18130
AT5G18140
AT5G18150
AT5G18160
AT5G65410
AT5G20200
AT5G20220
AT5G20225
AT5G20230
AT5G20240
AT5G12330
AT5G63260
AT5G60970
AT5G66658
AT5G66660
AT5G66670
AT5G65690
AT5G66970
AT5G66980
AT5G28300
AT5G41000
AT5G41010
AT5G41020
AT5G41030
AT5G41040
AT5G16350
AT5G55100
AT5G55110
AT5G28470
AT5G59330
AT5G63320
AT5G63340
AT5G63350
AT5G64770
AT5G67450
AT5G57620
AT5G67620
AT5G10170
AT5G10180
AT5G66190
AT5G66200
AT5G66210
AT5G66211
AT5G66230
AT5G66220
AT5G56220
AT5G56230
AT5G56240
AT5G11650
AT5G11660
AT5G01365
AT5G01370
AT5G61650
AT5G61660
AT5G01190
AT5G64850
AT5G64855
AT5G64860
AT5G64870
AT5G02030
AT5G01520
AT5G01530
AT5G01540
AT5G01542
AT5G39000
AT5G62710
AT5G62720
AT5G62730
AT5G66300
AT5G57670
AT5G52830
AT5G03510
AT5G62860
AT5G27010
AT5G27020
AT5G27030
AT5G63140
AT5G03705
AT5G03710
AT5G03720
AT5G64120
AT5G56200
AT5G07890
AT5G07900
AT5G07910
AT5G07920
AT5G07930
AT5G51790
AT5G08260
AT5G13190
AT5G13200
AT5G13210
AT5G19110
AT5G62200
AT5G62210
AT5G27360
AT5G27370
AT5G27380
AT5G16500
AT5G65530
AT5G57710
AT5G57720
AT5G64740
AT5G56950
AT5G56960
AT5G40900
AT5G67400
AT5G58910
AT5G67300
AT5G67310
AT5G60200
AT5G40740
AT5G40750
AT5G50350
AT5G50360
AT5G14105
AT5G14110
AT5G14120
AT5G14130
AT5G13220
AT5G49520
AT5G09990
AT5G09995
AT5G25450
AT5G22330
AT5G22340
AT5G22350
AT5G22355
AT5G66420
AT5G66430
AT5G56890
AT5G56900
AT5G56910
AT5G11940
AT5G15310
AT5G59820
AT5G25110
AT5G01900
AT5G45380
AT5G02560
AT5G02570
AT5G20690
AT5G11600
AT5G11610
AT5G19020
AT5G19025
AT5G19030
AT5G19040
AT5G03040
AT5G03050
AT5G54680
AT5G54690
AT5G54700
AT5G50860
AT5G50870
AT5G50880
AT5G50890
AT5G33406
AT5G33399
AT5G44300
AT5G44306
AT5G44310
AT5G52390
AT5G07210
AT5G57090
AT5G62480
AT5G62490
AT5G42785
AT5G42790
AT5G42797
AT5G42800
AT5G62440
AT5G62460
AT5G62470
AT5G64110
AT5G23920
AT5G23930
AT5G23940
AT5G06090
AT5G19250
AT5G02070
AT5G02080
AT5G02090
AT5G02100
AT5G28490
AT5G57520
AT5G15250
AT5G10450
AT5G54148
AT5G01270
AT5G01280
AT5G44090
AT5G44100
AT5G44110
AT5G44120
AT5G57630
AT5G57640
AT5G57650
AT5G03690
AT5G03700
AT5G59570
AT5G59580
AT5G59590
AT5G11190
AT5G17240
AT5G17250
AT5G17260
AT5G61150
AT5G61160
AT5G66985
AT5G66990
AT5G05140
AT5G05150
AT5G17165
AT5G01840
AT5G53870
AT5G43310
AT5G43320
AT5G43330
AT5G43340
AT5G04310
AT5G04320
AT5G04330
AT5G39190
AT5G39200
AT5G14680
AT5G14690
AT5G21100
AT5G21105
AT5G14040
AT5G14050
AT5G14060
AT5G14070
AT5G22810
AT5G01990
AT5G48175
AT5G48180
AT5G48190
AT5G48200
AT5G48205
AT5G38400
AT5G50175
AT5G50180
AT5G50190
AT5G50200
AT5G61460
AT5G61470
AT5G61480
AT5G63120
AT5G63130
AT5G63135
AT5G40390
AT5G06720
AT5G38197
AT5G38200
AT5G35570
AT5G35580
AT5G13080
AT5G04347
AT5G15470
AT5G15480
AT5G15490
AT5G15500
AT5G46600
AT5G20560
AT5G65925
AT5G65930
AT5G65940
AT5G55540
AT5G55550
AT5G55560
AT5G22570
AT5G43830
AT5G43840
AT5G25920
AT5G50830
AT5G45120
AT5G23310
AT5G23320
AT5G23330
AT5G23340
AT5G23350
AT5G23360
AT5G52280
AT5G52290
AT5G52300
AT5G65140
AT5G62800
AT5G62810
AT5G62820
AT5G62830
AT5G06970
AT5G06980
AT5G06990
AT5G07000
AT5G64810
AT5G55220
AT5G55230
AT5G55240
AT5G55250
AT5G43030
AT5G20360
AT5G20370
AT5G66350
AT5G18245
AT5G18250
AT5G18255
AT5G18260
AT5G18270
AT5G52490
AT5G52495
AT5G52500
AT5G21960
AT5G55835
AT5G55840
AT5G55850
AT5G55855
AT5G55856
AT5G02350
AT5G25000
AT5G25010
AT5G25020
AT5G25030
AT5G56510
AT5G08000
AT5G56990
AT5G18990
AT5G59690
AT5G59700
AT5G59710
AT5G59720
AT5G67420
AT5G44250
AT5G44260
AT5G10330
AT5G10336
AT5G10340
AT5G06380
AT5G42880
AT5G42890
AT5G42895
AT5G42900
AT5G09975
AT5G09976
AT5G63180
AT5G16550
AT5G16560
AT5G35695
AT5G35698
AT5G35700
AT5G55600
AT5G55610
AT5G55620
AT5G55630
AT5G55640
AT5G23190
AT5G57480
AT5G57490
AT5G57500
AT5G42430
AT5G07180
AT5G66816
AT5G21040
AT5G21050
AT5G41410
AT5G51250
AT5G24550
AT5G17810
AT5G13250
AT5G42960
AT5G42965
AT5G42970
AT5G42980
AT5G42990
AT5G43000
AT5G43990
AT5G44000
AT5G44005
AT5G44010
AT5G44020
AT5G52890
AT5G02250
AT5G02260
AT5G59385
AT5G59390
AT5G01100
AT5G42450
AT5G42460
AT5G47590
AT5G47600
AT5G64640
AT5G64650
AT5G64660
AT5G55893
AT5G23900
AT5G23903
AT5G64710
AT5G15410
AT5G15420
AT5G15430
AT5G54145
AT5G02460
AT5G03490
AT5G03495
AT5G14340
AT5G57120
AT5G57123
AT5G39830
AT5G39840
AT5G39850
AT5G06780
AT5G06790
AT5G02430
AT5G02435
AT5G02440
AT5G05920
[truncated: 15,133 more rows]
