# Supplementary material for: Polycomb-dependent differential chromatin compartmentalization determines gene coregulation in Arabidopsis
Source: HighWire-hosted journal article supplement (doi:10.1101/gr.273771.120), 2021-06-03
Supplement: Supplemental_Table_S6.xlsx [file Supplemental_Table_S6.xlsx]

## Sheet: S6
Supplementary Table S6: HiChIP Shoot Top2K Interactions
start.1.	end.1.	Gene1	Marked_H3K27me3	Gene_chr.1.	Gene_st1	Gene_end1	Shoot_1_H3K27me3	Root_1_H3K27me3	start.2.	end.2.	Gene2	Marked_H3K27me3	Gene_chr.1.	Gene_st2	Gene_end2	Shoot_2_H3K27me3	Root_2_H3K27me3	Z.score	InteractionID	PeakID.1.	strand.1.	Total.Reads.1.	PeakID.2.	strand.2.	Total.Reads.2.	Distance	Interaction.Reads	.1pected.Reads	LogP	FDR.Benjamini..based.on.1.77e.09.total.tests.	Bg.Interaction.Reads	Bg..1pected.Reads	Bg.Z.score	Bg.LogP	Bg.Total.Reads.Peak1	Bg.Total.Reads.Peak2	LogP.vs..Bg	Z.score.Difference.vs..Bg	Circos.Thickness	RNAseq_log2FoldChange.1	padj.1	RNAseq_log2FoldChange.2	padj.2
29836000	29838000	AT1G79320	NA	Chr1	29836685	29837908	0.58624	0.738168	29834000	29836000	AT1G79310	NA	Chr1	29833920	29835545	0.642258	0.715893	31012.559526	interaction148544	1-29836000	+	2712	1-29834000	+	2066	1923	312	0.070285	-1509.215377	0	88	0.069862	8800	-314.903179	1181	818	-185.958	22212.6	-564	-4.85692490549078	8.28902e-46	-4.5066324930577	2.39420565636195e-25
29838000	29840000	AT1G79330	NA	Chr1	29838652	29840137	0.667516	0.682485	29834000	29836000	AT1G79310	NA	Chr1	29833920	29835545	0.642258	0.715893	15900	interaction148554	1-29838000	+	1869	1-29834000	+	2066	4067	159	0.069862	-658.238297	0	29	0.069862	2900	-72.691692	923	818	-148.225	13000	-246	-2.61992807842551	1.20360815795342e-24	-4.5066324930577	2.39420565636195e-25
1230000	1232000	AT3G04570	yes	Chr3	1230985	1232328	5.08888	0.76369	1228000	1230000	AT3G04560	yes	Chr3	1227359	1229408	0.812014	0.77643	14969.201094	interaction258318	3-1230000	+	2838	3-1228000	+	2032	2638	155	0.07234	-637.118404	0	28	0.069862	2800	-69.312849	777	890	-140.831	12169.2	-238	-5.44179433445392	1.98755563568019e-40	-0.697974638954173	1.44429048631608e-09
19616000	19618000	AT5G48400	yes	Chr5	19616243	19619246	0.663021	0.857123	19614000	19616000	AT5G48390	NA	Chr5	19612061	19615383	0.545146	0.612826	17700	interaction568040	5-19616000	+	2905	5-19614000	+	1654	2118	177	0.069862	-753.345459	0	40	0.069862	4000	-112.258831	1474	784	-135.264	13700	-282	-3.12326416858058	7.02204163782907e-07	-0.995128311058111	0.0210480359435399
27134000	27136000	AT1G72125	yes	Chr1	27134167	27136389	2.1212	2.2068	27132000	27134000	AT1G72120	NA	Chr1	27132096	27133985	0.683203	0.743354	29547.831338	interaction135206	1-27134000	+	3148	1-27132000	+	1910	2098	319	0.075424	-1552.896866	0	110	0.069862	11000	-418.206111	1490	892	-129.826	18547.8	-582	-5.48725665324794	1.0489290888206e-37	-3.18707880456567	3.2281398517409e-11
7654000	7656000	AT3G21720	yes	Chr3	7652486	7656011	4.12039	4.87714	7648000	7650000	AT3G21710	yes	Chr3	7648341	7649799	4.35422	4.06726	10300	interaction292942	3-7654000	+	2551	3-7648000	+	1744	5882	103	0.069862	-381.619163	0	13	0.069862	1300	-23.583839	1222	635	-128.224	9000	-142	-2.79286161010035	9.56670464194467e-06	-4.91142600631298	3.13698645343283e-55
8308000	8310000	AT4G14450	yes	Chr4	8309473	8310058	3.56232	3.85542	8306000	8308000	AT4G14440	yes	Chr4	8306744	8307753	2.90404	3.12258	27600	interaction415286	4-8308000	+	1820	4-8306000	+	2496	1655	276	0.069862	-1301.797057	0	96	0.069862	9600	-351.979873	829	1121	-124.399	18000	-488	2.80589905973937	1.40675701612119e-09	0.808881906657255	0.000316985931734438
20152000	20154000	AT1G53990	yes	Chr1	20151015	20152752	4.02815	2.7653	20146000	20148000	AT1G53950	yes	Chr1	20146447	20147988	1.66979	1.22316	8800	interaction99538	1-20152000	+	1660	1-20146000	+	1833	5583	88	0.069862	-312.448409	0	10	0.069862	1000	-16.076908	547	682	-117.785	7800	-116	-5.66365969115388	5.40753197077067e-47	-6.862690182943	5.10490155626793e-17
25654000	25656000	AT5G64110	yes	Chr5	25654073	25656030	4.7651	5.19508	25650000	25652000	AT5G64100	yes	Chr5	25650640	25652123	4.54956	4.75674	14900	interaction598709	5-25654000	+	2298	5-25650000	+	1341	3715	149	0.069862	-609.436481	0	33	0.069862	3300	-87.144365	870	455	-116.854	11600	-228	3.33691506074173	4.46464744634949e-83	-4.99920448139462	4.65087914810901e-45
7648000	7650000	AT3G21710	yes	Chr3	7648341	7649799	4.35422	4.06726	7646000	7648000	AT3G21700	yes	Chr3	7644349	7646383	1.07156	0.932933	14300	interaction292905	3-7648000	+	1744	3-7646000	+	2103	2014	143	0.069862	-576.986643	0	31	0.069862	3100	-79.758258	635	941	-113.303	11200	-216	-4.91142600631298	3.13698645343283e-55	-0.69179506826022	0.00633113776369986
10260000	10262000	AT4G18640	yes	Chr4	10259677	10263764	0.94151	0.690587	10256000	10258000	AT4G18630	yes	Chr4	10257077	10258943	0.888515	0.708318	12300	interaction425786	4-10260000	+	2120	4-10256000	+	1385	3714	123	0.069862	-478.713031	0	23	0.069862	2300	-53.001064	1104	538	-112.837	10000	-178	-1.70825819529982	3.67656409388195e-23	-3.2772941989253	7.85775511973215e-23
8810000	8812000	AT3G24310	yes	Chr3	8811130	8812364	0.993493	0.819935	8806000	8808000	AT3G24300	yes	Chr3	8805630	8807388	2.83058	3.66072	11820.627089	interaction298566	3-8810000	+	1501	3-8806000	+	4112	4051	131	0.077424	-517.75894	0	22	0.069862	2200	-49.761321	637	1873	-111.298	9620.63	-194	-5.32193575608678	8.4510360278859e-20	-5.43632854005153	7.97428379867025e-45
7276000	7278000	AT1G20910	yes	Chr1	7276942	7281138	0.918606	0.711699	7272000	7274000	AT1G20900	yes	Chr1	7272555	7274072	4.4353	1.19888	18200	interaction38190	1-7276000	+	2095	1-7272000	+	2386	3901	182	0.069862	-777.658429	0	52	0.069862	5200	-158.768485	1039	912	-105.269	13000	-290	0.399062873589497	0.00270658088008102	-3.48516721079065	3.43517905994487e-23
5588000	5590000	AT3G16450	yes	Chr3	5588393	5590055	3.42818	3.68913	5586000	5588000	AT3G16440	yes	Chr3	5585943	5587750	3.57843	4.23229	12100	interaction281247	3-5588000	+	2604	3-5586000	+	802	1561	121	0.069862	-472.994057	0	25	0.069862	2500	-60.140624	896	244	-103.816	9600	-176	-3.26200979429494	9.57923125397121e-16	-5.8500611369739	5.9747820537492e-31
7984000	7986000	AT2G18380	yes	Chr2	7982867	7984096	3.2557	3.54196	7978000	7980000	AT2G18360	yes	Chr2	7976711	7979377	2.46242	2.00473	16500	interaction191012	2-7984000	+	2169	2-7978000	+	2359	6228	165	0.069862	-688.273838	0	44	0.069862	4400	-127.12236	1107	1146	-103.604	12100	-258	0.715018931067882	0.0101249162146009	-3.46414012953011	6.62360318418346e-65
28708000	28710000	AT1G76510	NA	Chr1	28708613	28712952	0.837935	0.757331	28704000	28706000	AT1G76500	yes	Chr1	28705526	28706562	4.08851	0.831379	15400	interaction143253	1-28708000	+	1984	1-28704000	+	1793	3011	154	0.069862	-632.803623	0	39	0.069862	3900	-108.631342	886	700	-103.326	11500	-236	0.259522519654211	0.0279398170476016	-3.67119029788526	6.67182306029005e-35
7652000	7654000	AT3G21720	yes	Chr3	7652486	7656011	4.12039	4.87714	7648000	7650000	AT3G21710	yes	Chr3	7648341	7649799	4.35422	4.06726	11900	interaction292925	3-7652000	+	2254	3-7648000	+	1744	4355	119	0.069862	-458.069344	0	24	0.069862	2400	-56.148554	1091	635	-101.041	9500	-170	-2.79286161010035	9.56670464194467e-06	-4.91142600631298	3.13698645343283e-55
12986000	12988000	AT4G25410	yes	Chr4	12985754	12987217	4.53417	4.11508	12982000	12984000	AT4G25400	yes	Chr4	12981294	12982468	5.11722	2.87462	10300	interaction439701	4-12986000	+	1936	4-12982000	+	1526	3931	103	0.069862	-382.060098	0	18	0.069862	1800	-37.653409	687	444	-99.8593	8500	-142	-2.66380163178544	5.58492089495126e-10	-5.74654356726695	2.8521010043939e-26
14256000	14258000	AT4G28890	NA	Chr4	14256332	14257735	0.874005	0.866464	14252000	14254000	AT4G28880	NA	Chr4	14251213	14254432	0.82413	0.796737	12000	interaction446699	4-14256000	+	1856	4-14252000	+	1904	3816	120	0.069862	-462.672533	0	25	0.069862	2500	-59.363872	701	915	-98.5913	9500	-172	-4.92728193222689	1.20202546271951e-40	-0.550066411860253	0.0143683295096886
22028000	22030000	AT5G54250	yes	Chr5	22025285	22030099	1.96772	3.09548	22016000	22018000	AT5G54230	yes	Chr5	22016249	22017933	3.75106	4.12947	5600	interaction580405	5-22028000	+	1868	5-22016000	+	1697	12566	56	0.069862	-174.220509	0	4	0.069862	400	-3.968116	1069	775	-97.7008	5200	-64	6.93117846701586	7.60836416346201e-116	-4.66314648115086	6.8384303163444e-52
23648000	23650000	AT5G58510	NA	Chr5	23648152	23654552	0.761375	0.739413	23646000	23648000	AT5G58500	yes	Chr5	23645534	23646083	2.54436	1.76229	15700	interaction588576	5-23648000	+	2145	5-23646000	+	1434	1991	157	0.069862	-650.031916	0	43	0.069862	4300	-123.943476	997	616	-97.0907	11400	-242	-0.29791007284087	0.00903853017760742	-2.38187723827156	2.03622956498983e-08
9894000	9896000	AT4G17800	yes	Chr4	9895289	9896668	4.74159	0.864347	9892000	9894000	AT4G17790	yes	Chr4	9891050	9892807	0.926942	0.860493	13500	interaction423919	4-9894000	+	1592	4-9892000	+	1828	2354	135	0.069862	-537.341677	0	33	0.069862	3300	-86.980485	531	665	-94.5001	10200	-200	-5.11431612049067	4.8090715012348e-32	-0.90356651290358	1.57404154497364e-22
4866000	4868000	AT1G14240	yes	Chr1	4864901	4868000	2.53929	2.87178	4862000	4864000	AT1G14230	NA	Chr1	4861265	4864094	0.811595	0.818111	12200	interaction25480	1-4866000	+	1925	1-4862000	+	2182	3982	122	0.069862	-472.25902	0	27	0.069862	2700	-65.892127	887	1022	-94.2779	9500	-176	-4.23283579024921	2.31320764436426e-22	-0.814159055959175	5.43170103447338e-10
6180000	6182000	AT1G17960	yes	Chr1	6180895	6183806	1.61903	1.91665	6178000	6180000	AT1G17950	yes	Chr1	6177616	6179289	4.27583	5.44063	20500	interaction32604	1-6180000	+	2163	1-6178000	+	1905	2498	205	0.069862	-902.077866	0	70	0.069862	7000	-233.984057	1004	941	-93.4226	13500	-338	-2.5002915326487	9.01476596013967e-16	-3.96403797126097	8.34913697099766e-19
29484000	29486000	AT1G78370	yes	Chr1	29484268	29485290	1.23386	1.2363	29482000	29484000	AT1G78360	yes	Chr1	29482069	29482966	1.37237	1.53327	23500	interaction146729	1-29484000	+	1929	1-29482000	+	2070	1911	235	0.069862	-1067.395327	0	88	0.069862	8800	-314.592934	873	970	-92.9485	14700	-400	3.78780495993514	2.0071457442816e-204	-3.90843433141634	1.0182252919455e-13
17694000	17696000	AT4G37660	NA	Chr4	17695495	17696270	0.722394	0.746077	17692000	17694000	AT4G37650	yes	Chr4	17691785	17693760	4.2242	2.81085	28500	interaction463965	4-17694000	+	1641	4-17692000	+	3070	1654	285	0.069862	-1356.753661	0	121	0.069862	12100	-472.636892	832	1516	-92.4617	16400	-508	-0.412899529240038	0.012121791230423	-0.957016499505467	1.59010615675548e-05
28682000	28684000	AT1G76440	yes	Chr1	28682128	28683750	0.81663	0.794728	28680000	28682000	AT1G76430	yes	Chr1	28678934	28681995	2.73594	2.3946	26000	interaction143145	1-28682000	+	1641	1-28680000	+	1685	1280	260	0.069862	-1212.009518	0	106	0.069862	10600	-399.636387	809	820	-90.3759	15400	-454	0.716952678718986	2.18192766092816e-06	-5.09158456331184	2.02944688130452e-24
19212000	19214000	AT2G46760	yes	Chr2	19213027	19215166	4.08373	4.57973	19208000	19210000	AT2G46750	yes	Chr2	19208319	19210958	4.33595	3.92432	12602.611131	interaction249539	2-19212000	+	2006	2-19208000	+	2952	4499	134	0.074283	-531.149639	0	31	0.069862	3100	-79.645723	755	1152	-89.6788	9502.61	-198	-1.73174590036166	1.06387181633293e-08	-5.48862639327275	2.85072547420192e-43
20770000	20772000	AT1G55590	yes	Chr1	20769319	20771871	0.993681	1.00442	20764000	20766000	AT1G55580	yes	Chr1	20764010	20765752	4.96175	5.00818	10900	interaction102928	1-20770000	+	1636	1-20764000	+	2932	6065	109	0.069862	-410.227512	0	23	0.069862	2300	-52.862145	785	1079	-88.7241	8600	-152	-0.282475082765143	0.00359529682176637	-3.65585650561721	7.77288849411175e-21
22000	24000	AT5G01060	yes	Chr5	22739	24847	0.673628	0.711924	20000	22000	AT5G01050	yes	Chr5	18085	20812	2.42681	2.80078	12400	interaction468312	5-22000	+	1386	5-20000	+	1653	1877	124	0.069862	-483.621496	0	30	0.069862	3000	-76.295734	617	701	-88.1635	9400	-180	-5.03021773163296	1.26711232537189e-21	-5.2686955537035	9.29581257321304e-49
26424000	26426000	AT1G70170	yes	Chr1	26423873	26425356	3.86761	3.68961	26420000	26422000	AT1G70160	NA	Chr1	26419948	26422529	0.743651	0.781893	14500	interaction131623	1-26424000	+	1986	1-26420000	+	2196	3586	145	0.069862	-586.344265	0	40	0.069862	4000	-112.250157	791	1248	-87.559	10500	-218	-6.18539342545154	4.27066734885613e-28	0.779567893031739	0.00029980938469064
25406000	25408000	AT1G67760	yes	Chr1	25405579	25406372	4.15595	4.49263	25402000	25404000	AT1G67750	yes	Chr1	25401587	25403503	1.8317	1.81608	16300	interaction126738	1-25406000	+	1641	1-25402000	+	2737	3308	163	0.069862	-679.968307	0	50	0.069862	5000	-151.1347	719	1504	-86.7018	11300	-254	-3.30063991148916	2.84093370900699e-10	-1.05310083909291	6.64883961661695e-05
17328000	17330000	AT3G47050	yes	Chr3	17328032	17330889	1.26533	1.56955	17326000	17328000	AT3G47040	yes	Chr3	17324161	17327152	1.20212	1.44806	18100	interaction342328	3-17328000	+	3078	3-17326000	+	1644	2070	181	0.069862	-774.624599	0	60	0.069862	6000	-191.766453	1597	815	-86.5959	12100	-290	-6.42585528645665	8.52904847159831e-17	-6.16579962850787	1.73040010608948e-20
1236000	1238000	AT3G04580	NA	Chr3	1235282	1238493	0.812896	0.726861	1230000	1232000	AT3G04570	yes	Chr3	1230985	1232328	5.08888	0.76369	12783.628573	interaction258343	3-1236000	+	2318	3-1230000	+	2838	5658	151	0.082521	-615.96126	0	33	0.069862	3300	-86.673248	985	777	-86.3587	9483.63	-230	-0.845093643908103	5.01691783417544e-25	-5.44179433445392	1.98755563568019e-40
26718000	26720000	AT1G70860	yes	Chr1	26718319	26718992	3.57272	3.39146	26716000	26718000	AT1G70850	yes	Chr1	26714865	26716829	3.24651	3.63745	20879.562788	interaction133023	1-26718000	+	2387	1-26716000	+	2369	2168	212	0.070935	-937.835665	0	77	0.069862	7700	-264.573229	970	1040	-84.6979	13179.6	-350	-5.00534879948906	2.63585317587919e-25	-5.15277519038264	2.68246148479094e-19
25016000	25018000	AT1G67030	yes	Chr1	25016542	25017512	3.2527	1.11995	25010000	25012000	AT1G67020	NA	Chr1	25011007	25012987	0.585067	0.543547	11800	interaction124625	1-25016000	+	2049	1-25010000	+	2625	5645	118	0.069862	-452.61573	0	28	0.069862	2800	-69.295605	807	1353	-84.6225	9000	-168	-4.9281404545665	5.49188648773401e-29	-2.30215252757457	0.00105409508265609
7982000	7984000	AT2G18380	yes	Chr2	7982867	7984096	3.2557	3.54196	7978000	7980000	AT2G18360	yes	Chr2	7976711	7979377	2.46242	2.00473	18400	interaction190997	2-7982000	+	2356	2-7978000	+	2359	4289	184	0.069862	-787.331255	0	62	0.069862	6200	-199.53161	1110	1146	-84.4705	12200	-294	0.715018931067882	0.0101249162146009	-3.46414012953011	6.62360318418346e-65
238000	240000	AT2G01530	yes	Chr2	239704	240520	2.35306	2.58191	236000	238000	AT2G01520	yes	Chr2	235924	237147	3.80859	3.58189	24800	interaction152433	2-238000	+	1899	2-236000	+	1661	2104	248	0.069862	-1143.28422	0	102	0.069862	10200	-381.78035	951	682	-84.4673	14600	-428	-5.87797315043041	4.19702946416447e-27	-6.05960000761775	6.36686331302061e-11
18000	20000	AT5G01050	yes	Chr5	18085	20812	2.42681	2.80078	16000	18000	AT5G01040	yes	Chr5	13127	16173	1.32961	1.05238	9700	interaction468296	5-18000	+	2436	5-16000	+	583	1740	97	0.069862	-359.247354	0	20	0.069862	2000	-44.017225	1028	242	-84.386	7700	-134	-5.2686955537035	9.29581257321304e-49	-1.95326828214928	7.76540087075172e-10
23258000	23260000	AT1G62810	yes	Chr1	23257725	23261966	1.23603	1.44315	23254000	23256000	AT1G62800	yes	Chr1	23253702	23257463	1.16753	0.855565	13000	interaction115151	1-23258000	+	2104	1-23254000	+	1474	3428	130	0.069862	-512.900874	0	35	0.069862	3500	-93.899104	1038	722	-81.6702	9500	-192	-1.83345871287696	3.21603927553839e-20	-2.15312050084475	2.6140737879789e-102
17936000	17938000	AT1G48510	yes	Chr1	17934828	17936915	1.32532	1.76048	17932000	17934000	AT1G48500	yes	Chr1	17931475	17934662	1.63291	1.92921	12400	interaction88233	1-17936000	+	794	1-17932000	+	2836	3447	124	0.069862	-488.027509	0	33	0.069862	3300	-87.283535	406	1280	-81.653	9100	-182	-5.76486333964884	9.75267052765536e-30	-3.74518457982504	1.25061329402822e-34
19456000	19458000	AT3G52490	yes	Chr3	19455698	19458919	3.10217	2.39961	19452000	19454000	AT3G52480	yes	Chr3	19452253	19453162	2.91533	1.61664	13623.016928	interaction353400	3-19456000	+	3190	3-19452000	+	1807	3952	141	0.072308	-566.694193	0	39	0.069862	3900	-108.48535	1500	814	-81.5586	9723.02	-212	-2.20720391305722	9.88396023194296e-17	-1.27193918328655	3.09480157768791e-06
22750000	22752000	AT5G56210	NA	Chr5	22750554	22752732	0.862148	0.806356	22748000	22750000	AT5G56200	yes	Chr5	22747767	22749249	2.1483	2.4575	25300	interaction584003	5-22750000	+	2187	5-22748000	+	2516	2438	253	0.069862	-1166.686441	0	106	0.069862	10600	-397.215221	1211	1312	-81.4923	14700	-436	0.896337850219879	2.86333237816288e-08	-3.30313910908574	8.17064534457917e-13
25382000	25384000	AT5G63370	NA	Chr5	25383905	25387252	0.900401	0.833361	25380000	25382000	AT5G63350	yes	Chr5	25379999	25381183	3.8948	5.18831	17300	interaction597279	5-25382000	+	904	5-25380000	+	2594	1945	173	0.069862	-740.437715	0	60	0.069862	6000	-193.725397	437	1243	-81.0686	11300	-276	-0.419737647472818	2.08741302880693e-06	-1.5950038884967	0.0296946722730737
12706000	12708000	AT2G29740	NA	Chr2	12706709	12708367	0.812358	0.792295	12704000	12706000	AT2G29730	NA	Chr2	12703536	12705181	0.726884	0.70314	19000	interaction215433	2-12706000	+	2115	2-12704000	+	1947	1979	190	0.069862	-820.911906	0	68	0.069862	6800	-225.308152	1044	958	-80.2818	12200	-306	-2.3350565327212	3.71356649864215e-06	-0.981039831748808	3.16501311771869e-05
5578000	5580000	AT3G16420	yes	Chr3	5579385	5580953	2.04457	1.96203	5574000	5576000	AT3G16410	yes	Chr3	5571991	5574541	2.33482	2.54081	6700	interaction281167	3-5578000	+	1691	3-5574000	+	1586	4348	67	0.069862	-220.094777	0	9	0.069862	900	-13.751143	533	581	-80.0537	5800	-82	-1.48347976613498	0.00673681941841922	-4.06210710584225	3.8050475675441e-40
12964000	12966000	AT1G35330	yes	Chr1	12965045	12966113	2.71433	3.07658	12962000	12964000	AT1G35320	yes	Chr1	12959056	12962853	1.86187	0.957037	17500	interaction67288	1-12964000	+	2258	1-12962000	+	1493	2240	175	0.069862	-743.83727	0	60	0.069862	6000	-192.293367	1174	659	-80.0429	11500	-278	-5.47953780458197	2.10885059445658e-11	-2.63216055213653	4.17618978800579e-30
30370000	30372000	AT1G80820	yes	Chr1	30370571	30372670	1.79594	1.729	30366000	30368000	AT1G80810	NA	Chr1	30365286	30368898	0.63244	0.618938	11400	interaction151378	1-30370000	+	1928	1-30366000	+	1865	3735	114	0.069862	-433.671209	0	28	0.069862	2800	-69.234188	936	984	-78.9288	8600	-162	-3.46807589803782	7.84468261667058e-27	0.472134584684665	0.0385460613198727
4370000	4372000	AT3G13432	yes	Chr3	4371469	4371987	2.97144	2.39812	4368000	4370000	AT3G13430	yes	Chr3	4367180	4368879	0.820135	0.903874	24630.243889	interaction275082	3-4370000	+	1946	3-4368000	+	2963	2012	255	0.072329	-1179.996713	0	106	0.069862	10600	-399.102733	872	1411	-78.7034	14030.2	-442	-5.33456878160491	1.26308935772194e-16	-0.486351610153733	0.0238374503516128
7568000	7570000	AT2G17430	NA	Chr2	7568017	7570840	0.604762	0.82044	7564000	7566000	AT2G17420	NA	Chr2	7564344	7566539	0.826367	0.875551	18700	interaction188859	2-7568000	+	2489	2-7564000	+	2210	3578	187	0.069862	-803.76339	0	67	0.069862	6700	-220.674421	1131	1122	-78.3631	12000	-300	-2.62463907096101	6.29440873892471e-39	-2.31224194572099	2.40052622789871e-37
5592000	5594000	AT3G16460	yes	Chr3	5592581	5595717	1.34562	1.18725	5590000	5592000	AT3G16450	yes	Chr3	5588393	5590055	3.42818	3.68913	10200	interaction281281	3-5592000	+	2376	3-5590000	+	1236	1969	102	0.069862	-378.174843	0	23	0.069862	2300	-53.072	857	464	-78.3231	7900	-140	-2.87890856891917	2.02134473310579e-10	-3.26200979429494	9.57923125397121e-16
24706000	24708000	AT1G66280	yes	Chr1	24706511	24709785	3.14498	1.51267	24700000	24702000	AT1G66270	yes	Chr1	24699989	24703041	4.01593	3.32437	8300	interaction122920	1-24706000	+	2226	1-24700000	+	1566	6184	83	0.069862	-290.041342	0	15	0.069862	1500	-28.974257	872	662	-78.1618	6800	-108	-5.95777071295543	6.66448394214792e-28	-5.78625839190494	5.82729884505782e-25
14762000	14764000	AT4G30170	yes	Chr4	14762840	14764627	3.7265	3.25773	14758000	14760000	AT4G30160	NA	Chr4	14753348	14760189	0.894723	0.747353	10200	interaction449329	4-14762000	+	1440	4-14758000	+	1936	3989	102	0.069862	-377.564113	0	23	0.069862	2300	-53.04162	493	888	-77.9413	7900	-140	-5.06996518156847	1.12933663722793e-88	-0.442386708423899	4.16118121638216e-08
11526000	11528000	AT2G27010	yes	Chr2	11526167	11527854	0.711995	0.707425	11524000	11526000	AT2G27000	NA	Chr2	11523303	11525095	0.848414	0.731716	28567.914808	interaction209204	2-11526000	+	3358	2-11524000	+	2090	2071	360	0.088037	-1796.547016	0	138	0.069862	13800	-557.154059	1646	909	-77.7567	14767.9	-672	-5.39978231616114	1.35432885799268e-28	-5.41538629905417	3.96150110648536e-51
19214000	19216000	AT2G46760	yes	Chr2	19213027	19215166	4.08373	4.57973	19210000	19212000	AT2G46750	yes	Chr2	19208319	19210958	4.33595	3.92432	12100	interaction249554	2-19214000	+	3051	2-19210000	+	1595	3914	121	0.069862	-468.195884	0	32	0.069862	3200	-83.369312	1287	564	-77.3687	8900	-174	-1.73174590036166	1.06387181633293e-08	-5.48862639327275	2.85072547420192e-43
7082000	7084000	AT5G20885	NA	Chr5	7083964	7084734	0.683485	0.850444	7080000	7082000	AT5G20870	NA	Chr5	7079974	7081769	0.614903	0.675295	31100	interaction505788	5-7082000	+	1985	5-7080000	+	2713	2073	311	0.069862	-1504.365809	0	149	0.069862	14900	-612.040392	1037	1432	-77.3068	16200	-564	-1.11360355011831	3.7366451008067e-07	-0.85368148497575	0.0294228458876918
9896000	9898000	AT4G17800	yes	Chr4	9895289	9896668	4.74159	0.864347	9892000	9894000	AT4G17790	yes	Chr4	9891050	9892807	0.926942	0.860493	9200	interaction423931	4-9896000	+	1387	4-9892000	+	1828	3524	92	0.069862	-331.195868	0	19	0.069862	1900	-40.584861	525	665	-76.8154	7300	-124	-5.11431612049067	4.8090715012348e-32	-0.90356651290358	1.57404154497364e-22
10868000	10870000	AT1G30650	yes	Chr1	10868302	10871297	3.39071	5.19602	10864000	10866000	AT1G30640	NA	Chr1	10860654	10864700	0.81571	0.777133	12000	interaction57022	1-10868000	+	3073	1-10864000	+	1246	3944	120	0.069862	-464.631795	0	32	0.069862	3200	-83.357296	1359	572	-76.7174	8800	-174	-4.31342891170294	1.22380843781736e-114	-1.3834219904138	5.19882775672274e-17
18644000	18646000	AT3G50300	yes	Chr3	18643954	18645406	1.09228	0.972185	18640000	18642000	AT3G50290	yes	Chr3	18640171	18640993	1.69979	2.08384	13200	interaction349199	3-18644000	+	2300	3-18640000	+	1528	3967	132	0.069862	-522.625904	0	38	0.069862	3800	-104.801378	1085	789	-76.2767	9400	-194	-5.46401721719268	4.02685201755766e-62	-4.56364031233313	1.09558635489172e-14
7648000	7650000	AT3G21710	yes	Chr3	7648341	7649799	4.35422	4.06726	7644000	7646000	AT3G21700	yes	Chr3	7644349	7646383	1.07156	0.932933	8700	interaction292904	3-7648000	+	1744	3-7644000	+	1704	3622	87	0.069862	-307.858776	0	17	0.069862	1700	-34.639622	635	833	-76.2057	7000	-114	-4.91142600631298	3.13698645343283e-55	-0.69179506826022	0.00633113776369986
12934000	12936000	AT2G30350	NA	Chr2	12934149	12935773	0.816967	0.969799	12932000	12934000	AT2G30340	yes	Chr2	12931218	12932582	2.67545	3.27105	23700	interaction216713	2-12934000	+	2473	2-12932000	+	1875	2151	237	0.069862	-1079.038848	0	100	0.069862	10000	-370.289601	1381	907	-75.9719	13700	-404	1.01455395808112	5.64383164073799e-06	-5.10923866470595	8.50865581261768e-23
20146000	20148000	AT1G53950	yes	Chr1	20146447	20147988	1.66979	1.22316	20144000	20146000	AT1G53940	yes	Chr1	20143278	20145780	1.87147	1.80709	15200	interaction99515	1-20146000	+	1833	1-20144000	+	1545	2255	152	0.069862	-623.640534	0	49	0.069862	4900	-147.651169	682	553	-75.6269	10300	-232	-6.862690182943	5.10490155626793e-17	-4.98256959541925	1.54283488595112e-38
16064000	16066000	AT4G33350	NA	Chr4	16064547	16066767	0.802503	0.816848	16062000	16064000	AT4G33330	yes	Chr4	16059753	16063070	2.1475	2.20748	18100	interaction455938	4-16064000	+	2206	4-16062000	+	1787	2042	181	0.069862	-773.779888	0	66	0.069862	6600	-216.894256	1161	898	-74.5044	11500	-290	2.12551440513884	7.7867188257146e-68	-2.48723770318895	5.25679695764001e-12
10124000	10126000	AT1G29025	NA	Chr1	10124347	10127068	0.705936	0.938335	10120000	10122000	AT1G29020	yes	Chr1	10120496	10122902	0.892388	1.232	13917.207965	interaction52948	1-10124000	+	2185	1-10120000	+	2619	3948	143	0.071784	-575.767105	0	43	0.069862	4300	-123.23826	1198	1392	-74.1856	9617.21	-214	-5.44123955854727	2.33655676946666e-51	-4.000752555755	1.3063560194094e-40
8636000	8638000	AT4G15130	yes	Chr4	8637665	8639581	0.769904	0.734497	8634000	8636000	AT4G15120	yes	Chr4	8634724	8635561	3.7532	1.34056	15400	interaction417002	4-8636000	+	1403	4-8634000	+	1421	1829	154	0.069862	-634.734625	0	51	0.069862	5100	-155.466305	608	663	-74.1372	10300	-238	0.701854891617592	0.000382637759557683	-3.82142643738358	5.06563721381025e-23
19210000	19212000	AT2G46750	yes	Chr2	19208319	19210958	4.33595	3.92432	19206000	19208000	AT2G46740	yes	Chr2	19205156	19207455	3.45928	3.45904	12600	interaction249533	2-19210000	+	1595	2-19206000	+	2905	3517	126	0.069862	-492.695418	0	36	0.069862	3600	-97.772265	564	1237	-73.3564	9000	-184	-5.48862639327275	2.85072547420192e-43	-4.53993022884591	4.61185116946836e-24
19668000	19670000	AT2G48090	yes	Chr2	19669109	19669764	2.19035	1.54813	19666000	19668000	AT2G48080	yes	Chr2	19664989	19667092	0.765462	0.754537	20700	interaction251834	2-19668000	+	2552	2-19666000	+	1646	2110	207	0.069862	-914.860459	0	83	0.069862	8300	-291.984927	1200	838	-73.2233	12400	-342	-2.69022573032474	1.11198539963804e-18	-2.81151660257185	4.50160251201512e-16
14244000	14246000	AT4G28850	yes	Chr4	14244294	14245957	4.74028	4.8171	14242000	14244000	AT4G28840	yes	Chr4	14240796	14242611	4.89807	3.76795	14400	interaction446640	4-14244000	+	2808	4-14242000	+	1328	2345	144	0.069862	-583.99168	0	46	0.069862	4600	-136.273132	1154	439	-73.0701	9800	-218	-7.1100543744291	1.07107629033773e-10	-5.04814268373573	4.7112009766086e-25
6368000	6370000	AT5G19050	yes	Chr5	6369266	6371904	0.820379	0.765254	6362000	6364000	AT5G19040	yes	Chr5	6361836	6363413	2.36523	2.96729	8700	interaction501973	5-6368000	+	1425	5-6362000	+	2206	5978	87	0.069862	-308.295456	0	18	0.069862	1800	-37.557935	637	985	-72.4822	6900	-114	-0.858444970271763	1.48684963229048e-05	-4.15937226692952	4.24549779827814e-50
8238000	8240000	AT2G18990	yes	Chr2	8238690	8240002	0.84181	0.770683	8234000	8236000	AT2G18980	yes	Chr2	8233334	8235316	1.41209	1.33338	15400	interaction192206	2-8238000	+	2843	2-8234000	+	1402	3768	154	0.069862	-634.741013	0	52	0.069862	5200	-159.304215	1677	668	-72.0687	10200	-238	0.260693485315915	0.0298322929636785	-5.30334569532118	1.31564213116291e-69
16098000	16100000	AT4G33460	NA	Chr4	16098069	16100266	0.838519	0.843912	16096000	16098000	AT4G33450	yes	Chr4	16095391	16096610	3.38073	5.0066	15800	interaction456169	4-16098000	+	2246	4-16096000	+	1692	2368	158	0.069862	-653.810989	0	54	0.069862	5400	-167.005038	1119	828	-71.9329	10400	-244	1.45404302113899	6.24649237172189e-28	-5.78802471902014	1.94312282119402e-21
23704000	23706000	AT5G58670	yes	Chr5	23704230	23706800	1.21499	1.09516	23702000	23704000	AT5G58660	yes	Chr5	23701466	23703988	2.77731	1.79919	22000	interaction588847	5-23704000	+	2820	5-23702000	+	1063	1515	220	0.069862	-995.41036	0	95	0.069862	9500	-350.567932	1313	532	-71.1633	12500	-372	-0.837150720345898	0.00151836570070743	-1.99949331684635	0.000450075875014072
23714000	23716000	AT5G58700	NA	Chr5	23712999	23716098	0.640169	0.734922	23710000	23712000	AT5G58690	NA	Chr5	23709528	23712131	0.553429	0.697828	23800	interaction588901	5-23714000	+	2143	5-23710000	+	1992	3376	238	0.069862	-1083.689855	0	104	0.069862	10400	-388.485509	1040	1039	-70.9296	13400	-406	-1.62971176750781	1.10946116924319e-32	-2.21140052169657	1.26808682817027e-34
13254000	13256000	AT2G31085	yes	Chr2	13254177	13254706	3.94389	4.29626	13252000	13254000	AT2G31083	yes	Chr2	13252218	13252765	4.37279	5.72232	12900	interaction218316	2-13254000	+	1253	2-13252000	+	1730	1746	129	0.069862	-508.982308	0	39	0.069862	3900	-108.772351	617	878	-70.5926	9000	-190	-4.39560142593897	1.0685675350267e-35	-6.24796038494498	1.0301155136567e-31
7750000	7752000	AT4G13310	yes	Chr4	7750304	7753133	2.30196	2.10437	7746000	7748000	AT4G13300	yes	Chr4	7742870	7746363	2.77603	3.11178	11800	interaction412275	4-7750000	+	2086	4-7746000	+	1569	3788	118	0.069862	-453.676806	0	33	0.069862	3300	-86.746851	976	699	-70.5798	8500	-170	-5.8436265144244	7.15377954823527e-18	-6.10670377558016	4.59128580795761e-18
25122000	25124000	AT1G67150	yes	Chr1	25122458	25124695	2.97091	2.62358	25120000	25122000	AT1G67148	yes	Chr1	25121234	25121898	2.48997	1.10977	6200	interaction125233	1-25122000	+	988	1-25120000	+	1079	2384	62	0.069862	-199.743868	0	9	0.069862	900	-13.777151	360	419	-70.5677	5300	-74	-6.45697952637954	1.94349889612166e-15	-5.83098855690114	2.67366535391313e-27
15488000	15490000	AT2G36895	NA	Chr2	15489027	15490347	0.837743	0.674597	15486000	15488000	AT2G36890	yes	Chr2	15485778	15487277	3.00683	1.6196	20600	interaction230404	2-15488000	+	1691	2-15486000	+	2018	1817	206	0.069862	-909.025644	0	84	0.069862	8400	-296.593118	824	853	-70.5338	12200	-340	1.82666757002635	5.27941088578092e-11	-3.4397429273159	1.03920855863524e-41
23650000	23652000	AT5G58510	NA	Chr5	23648152	23654552	0.761375	0.739413	23646000	23648000	AT5G58500	yes	Chr5	23645534	23646083	2.54436	1.76229	6500	interaction588585	5-23650000	+	1253	5-23646000	+	1434	4331	65	0.069862	-211.965868	0	10	0.069862	1000	-16.07396	572	616	-70.2758	5500	-78	-0.29791007284087	0.00903853017760742	-2.38187723827156	2.03622956498983e-08
418000	420000	AT3G02240	yes	Chr3	418458	419164	3.58924	2.72789	416000	418000	AT3G02230	yes	Chr3	415392	417547	0.813545	0.711384	15000	interaction254219	3-418000	+	1570	3-416000	+	2059	2027	150	0.069862	-613.274016	0	51	0.069862	5100	-155.188907	699	958	-69.0239	9900	-228	-3.43647661582699	3.12226504975319e-26	-2.05963738292753	9.47748389009782e-66
28708000	28710000	AT1G76510	NA	Chr1	28708613	28712952	0.837935	0.757331	28706000	28708000	AT1G76500	yes	Chr1	28705526	28706562	4.08851	0.831379	15700	interaction143254	1-28708000	+	1984	1-28706000	+	1685	2138	157	0.069862	-648.683247	0	55	0.069862	5500	-171.402432	886	703	-68.8574	10200	-242	0.259522519654211	0.0279398170476016	-3.67119029788526	6.67182306029005e-35
18112000	18114000	AT2G43690	NA	Chr2	18112588	18114583	0.615244	0.592286	18108000	18110000	AT2G43680	NA	Chr2	18108348	18111831	0.671615	0.689652	12100	interaction244244	2-18112000	+	2427	2-18108000	+	2006	3594	121	0.069862	-467.234226	0	35	0.069862	3500	-93.649056	1218	1050	-68.84	8600	-174	0.589157430400637	0.0110367661735828	-0.365056173405015	0.0123096961480184
20150000	20152000	AT1G53990	yes	Chr1	20151015	20152752	4.02815	2.7653	20146000	20148000	AT1G53950	yes	Chr1	20146447	20147988	1.66979	1.22316	6400	interaction99529	1-20150000	+	1212	1-20146000	+	1833	4079	64	0.069862	-207.794299	0	10	0.069862	1000	-16.115646	348	682	-68.5279	5400	-76	-5.66365969115388	5.40753197077067e-47	-6.862690182943	5.10490155626793e-17
17264000	17266000	AT5G43040	yes	Chr5	17263964	17265620	3.00455	3.28253	17258000	17260000	AT5G43030	yes	Chr5	17258990	17260685	3.1907	2.85145	17233.267393	interaction556172	5-17264000	+	3377	5-17258000	+	1713	5605	179	0.072565	-763.586984	0	66	0.069862	6600	-217.107406	1755	826	-68.0929	10633.3	-286	-2.48307242687383	6.07507653557663e-18	-4.71239520578968	1.98550882829519e-34
10928000	10930000	AT4G20235	yes	Chr4	10929145	10931277	3.0347	1.63069	10924000	10926000	AT4G20230	yes	Chr4	10924120	10926758	2.62847	2.09809	13100	interaction429172	4-10928000	+	1575	4-10924000	+	2224	3889	131	0.069862	-517.480344	0	41	0.069862	4100	-116.193188	674	1089	-67.727	9000	-194	-4.42468383305961	1.79860229351388e-16	-2.60830014662362	1.37775781618707e-21
15444000	15446000	AT4G31920	yes	Chr4	15444116	15446959	0.783603	0.887728	15442000	15444000	AT4G31910	yes	Chr4	15441081	15443900	3.341	2.09261	12300	interaction452852	4-15444000	+	2796	4-15442000	+	1294	2174	123	0.069862	-479.112806	0	37	0.069862	3700	-101.614638	1455	494	-67.6013	8600	-178	-1.30768031585234	4.14061058532534e-15	-3.66235803891514	1.29400464491875e-23
7278000	7280000	AT1G20910	yes	Chr1	7276942	7281138	0.918606	0.711699	7272000	7274000	AT1G20900	yes	Chr1	7272555	7274072	4.4353	1.19888	8600	interaction38201	1-7278000	+	1196	1-7272000	+	2386	5456	86	0.069862	-304.270261	0	19	0.069862	1900	-40.531454	639	912	-67.4809	6700	-114	0.399062873589497	0.00270658088008102	-3.48516721079065	3.43517905994487e-23
4136000	4138000	AT1G12200	yes	Chr1	4137532	4140028	3.21766	2.10989	4126000	4128000	AT1G12160	yes	Chr1	4126065	4128310	2.8369	0.838062	4045.834225	interaction21858	1-4136000	+	2037	1-4126000	+	3041	10581	45	0.077705	-130.570181	0	3	0.069862	300	-2.523193	937	1309	-67.3928	3745.83	-48	-1.7081642598551	5.83463142047871e-20	-5.32593217299611	7.91270476231604e-45
8276000	8278000	AT3G23180	yes	Chr3	8277036	8278396	1.2416	0.782132	8274000	8276000	AT3G23175	yes	Chr3	8273999	8275470	1.04386	1.06549	8100	interaction295893	3-8276000	+	1242	3-8274000	+	1047	2180	81	0.069862	-282.156388	0	17	0.069862	1700	-34.70121	493	482	-67.1408	6400	-104	-4.65245374764345	5.3228567159512e-57	-5.46738052578017	1.81080714466651e-60
18614000	18616000	AT3G50210	NA	Chr3	18614169	18616452	0.802985	0.787523	18612000	18614000	AT3G50200	yes	Chr3	18612461	18613323	1.51389	1.10633	20500	interaction349050	3-18614000	+	2089	3-18612000	+	2153	1930	205	0.069862	-901.04878	0	85	0.069862	8500	-300.245659	1144	1028	-67.1203	12000	-336	-0.990390685771492	3.29942204592987e-15	-2.65113299646334	3.50788816178274e-13
19618000	19620000	AT5G48400	yes	Chr5	19616243	19619246	0.663021	0.857123	19614000	19616000	AT5G48390	NA	Chr5	19612061	19615383	0.545146	0.612826	9700	interaction568055	5-19618000	+	2686	5-19614000	+	1654	3538	97	0.069862	-353.757495	0	24	0.069862	2400	-56.070813	1263	784	-66.8841	7300	-132	-3.12326416858058	7.02204163782907e-07	-0.995128311058111	0.0210480359435399
7682000	7684000	AT5G22950	yes	Chr5	7681304	7682903	0.88641	0.959606	7668000	7670000	AT5G22930	yes	Chr5	7668228	7669315	0.788943	0.801802	4400	interaction508850	5-7682000	+	1716	5-7668000	+	2031	14374	44	0.069862	-126.826022	0	4	0.069862	400	-3.967579	889	1065	-66.6792	4000	-46	-0.437223239521722	0.0021130427172316	-1.87319959239005	1.72111640044882e-21
15898000	15900000	AT5G39720	yes	Chr5	15899645	15900653	2.9535	2.57087	15896000	15898000	AT5G39710	yes	Chr5	15895728	15897972	0.78931	0.731769	25900	interaction549187	5-15898000	+	1599	5-15896000	+	2920	1763	259	0.069862	-1206.873035	0	123	0.069862	12300	-482.115074	872	1719	-66.3366	13600	-452	-3.06301601323789	6.65432962148432e-06	0.83438368869112	2.13645346597112e-07
9440000	9442000	AT1G27180	yes	Chr1	9439858	9446106	0.585244	0.562684	9436000	9438000	AT1G27170	yes	Chr1	9433487	9439417	0.531624	0.611092	13900	interaction49336	1-9440000	+	2324	1-9436000	+	1692	3949	139	0.069862	-557.019954	0	46	0.069862	4600	-135.118643	1192	850	-66.2658	9300	-208	-1.35096398754296	1.11487849214374e-22	-2.12581343158176	2.31837441610573e-26
20156000	20158000	AT1G54000	yes	Chr1	20154168	20156419	3.55374	1.45037	20152000	20154000	AT1G53990	yes	Chr1	20151015	20152752	4.02815	2.7653	6800	interaction99556	1-20156000	+	1131	1-20152000	+	1660	3568	68	0.069862	-224.938466	0	12	0.069862	1200	-21.05065	392	547	-65.9255	5600	-84	-5.58651785762639	2.25931212151463e-43	-5.66365969115388	5.40753197077067e-47
29838000	29840000	AT1G79330	NA	Chr1	29838652	29840137	0.667516	0.682485	29836000	29838000	AT1G79320	NA	Chr1	29836685	29837908	0.58624	0.738168	28100	interaction148555	1-29838000	+	1869	1-29836000	+	2712	2080	281	0.069862	-1330.151552	0	138	0.069862	13800	-556.980795	923	1181	-65.9196	14300	-498	-2.61992807842551	1.20360815795342e-24	-4.85692490549078	8.28901676330025e-46
14244000	14246000	AT4G28850	yes	Chr4	14244294	14245957	4.74028	4.8171	14240000	14242000	AT4G28840	yes	Chr4	14240796	14242611	4.89807	3.76795	17477.151757	interaction446639	4-14244000	+	2808	4-14240000	+	2508	3885	221	0.088342	-986.510534	0	69	0.069862	6900	-229.693207	1154	929	-65.6014	10577.2	-368	-7.1100543744291	1.07107629033773e-10	-5.04814268373573	4.7112009766086e-25
28196000	28198000	AT1G75120	NA	Chr1	28196856	28198802	0.660888	0.53412	28194000	28196000	AT1G75110	NA	Chr1	28194114	28195933	0.674086	0.638657	31300	interaction140883	1-28196000	+	2674	1-28194000	+	2067	1917	313	0.069862	-1515.112159	0	161	0.069862	16100	-672.154858	1612	1256	-65.3506	15200	-568	2.36216298735442	9.90000513578699e-46	1.27083328618509	2.05971827125538e-06
12966000	12968000	AT1G35330	yes	Chr1	12965045	12966113	2.71433	3.07658	12962000	12964000	AT1G35320	yes	Chr1	12959056	12962853	1.86187	0.957037	11200	interaction67302	1-12966000	+	1673	1-12962000	+	1493	3752	112	0.069862	-424.939001	0	32	0.069862	3200	-83.245793	917	659	-65.3426	8000	-158	-5.47953780458197	2.10885059445658e-11	-2.63216055213653	4.17618978800579e-30
14542000	14544000	AT2G34510	yes	Chr2	14543996	14546879	0.82401	1.69141	14540000	14542000	AT2G34500	NA	Chr2	14539478	14541406	0.658988	0.788644	13500	interaction225473	2-14542000	+	1112	2-14540000	+	2614	2740	135	0.069862	-539.94013	0	45	0.069862	4500	-131.721742	600	1498	-65.0704	9000	-202	3.03113378747558	4.52838831955037e-13	-4.34387974868038	6.36343452423161e-13
7448000	7450000	AT3G21230	yes	Chr3	7448039	7452000	1.07866	0.87314	7446000	7448000	AT3G21220	NA	Chr3	7445756	7447351	0.988257	0.792036	17700	interaction291661	3-7448000	+	1970	3-7446000	+	1552	2141	177	0.069862	-754.006995	0	70	0.069862	7000	-234.496877	1082	788	-64.0811	10700	-282	-1.88253389402041	3.76207980676136e-21	-0.281910419334868	0.00113689938212511
12984000	12986000	AT4G25410	yes	Chr4	12985754	12987217	4.53417	4.11508	12982000	12984000	AT4G25400	yes	Chr4	12981294	12982468	5.11722	2.87462	8600	interaction439693	4-12984000	+	1159	4-12982000	+	1526	1937	86	0.069862	-304.370561	0	20	0.069862	2000	-43.790023	348	444	-64.0761	6600	-114	-2.66380163178544	5.58492089495126e-10	-5.74654356726695	2.8521010043939e-26
834000	836000	AT4G01925	yes	Chr4	833172	834340	1.30554	1.6712	830000	832000	AT4G01920	yes	Chr4	828889	831200	1.47938	1.56298	14600	interaction378264	4-834000	+	2644	4-830000	+	2058	4091	146	0.069862	-591.209849	0	51	0.069862	5100	-154.498829	1355	1123	-63.7325	9500	-220	-5.48512005805484	9.7977823966127e-35	-3.01021336269712	1.00257740500067e-20
7656000	7658000	AT3G21720	yes	Chr3	7652486	7656011	4.12039	4.87714	7648000	7650000	AT3G21710	yes	Chr3	7648341	7649799	4.35422	4.06726	5300	interaction292953	3-7656000	+	1267	3-7648000	+	1744	8114	53	0.069862	-162.374714	0	7	0.069862	700	-9.418041	686	635	-63.6526	4600	-60	-2.79286161010035	9.56670464194467e-06	-4.91142600631298	3.13698645343283e-55
20154000	20156000	AT1G54000	yes	Chr1	20154168	20156419	3.55374	1.45037	20152000	20154000	AT1G53990	yes	Chr1	20151015	20152752	4.02815	2.7653	9400	interaction99548	1-20154000	+	1209	1-20152000	+	1660	2107	94	0.069862	-340.886416	0	24	0.069862	2400	-56.373768	411	547	-63.1675	7000	-126	-5.58651785762639	2.25931212151463e-43	-5.66365969115388	5.40753197077067e-47
2210000	2212000	AT3G07000	yes	Chr3	2209411	2211307	1.91651	2.05292	2206000	2208000	AT3G06990	yes	Chr3	2206386	2208058	1.8264	2.15595	17259.840748	interaction263202	3-2210000	+	1952	3-2206000	+	3521	3446	213	0.086216	-945.452921	0	69	0.069862	6900	-229.488769	1009	2053	-62.9271	10359.8	-354	-3.09861566832358	2.35511622081948e-22	-2.03726235996494	9.20980642449332e-12
5578000	5580000	AT1G16310	yes	Chr1	5578430	5580693	0.897845	0.938485	5574000	5576000	AT1G16300	NA	Chr1	5574309	5577622	0.757107	0.739902	16800	interaction29222	1-5578000	+	1869	1-5574000	+	2788	3792	168	0.069862	-704.952776	0	65	0.069862	6500	-212.409166	991	1337	-62.4422	10300	-264	-1.93326806622156	2.01648822361325e-21	-1.83896007727843	9.80412143654384e-18
26660000	26662000	AT5G66770	NA	Chr5	26660599	26662894	0.613565	0.63176	26656000	26658000	AT5G66760	NA	Chr5	26653657	26657536	0.752611	0.791097	10000	interaction603299	5-26660000	+	1624	5-26656000	+	1788	3972	100	0.069862	-367.781008	0	27	0.069862	2700	-65.866545	952	960	-62.3842	7300	-136	0.315912029289558	0.0200914777749063	-1.20998619004427	3.88467437306494e-12
20920000	20922000	AT5G51510	yes	Chr5	20921432	20922978	0.973778	0.898222	20916000	20918000	AT5G51500	yes	Chr5	20917928	20919838	3.69648	3.97632	9400	interaction574736	5-20920000	+	2118	5-20916000	+	2049	3732	94	0.069862	-339.371886	0	24	0.069862	2400	-56.023887	914	924	-62.2922	7000	-126	-0.596873438558416	7.69546636255071e-07	-5.67931859543542	6.13098401330105e-14
1266000	1268000	AT5G04470	yes	Chr5	1266624	1267416	1.65605	0.942458	1264000	1266000	AT5G04460	yes	Chr5	1259530	1264025	0.731995	0.753503	8000	interaction474603	5-1266000	+	1118	5-1264000	+	1040	1499	80	0.069862	-277.70416	0	18	0.069862	1800	-37.640427	520	463	-61.8998	6200	-104	-2.46491441937004	2.08295568662987e-18	-0.477458808130472	3.76212675297692e-07
10024000	10026000	AT2G23540	yes	Chr2	10024345	10026233	2.7617	2.65867	10022000	10024000	AT2G23530	yes	Chr2	10020651	10022864	0.816423	0.689696	11300	interaction201517	2-10024000	+	1896	2-10022000	+	1442	2871	113	0.069862	-429.89917	0	34	0.069862	3400	-90.2698	1069	748	-61.7717	7900	-160	-5.39476212367748	2.47617893809495e-36	-0.906404115724663	0.000236450283087264
20932000	20934000	AT1G55970	NA	Chr1	20932128	20938290	0.683985	0.602744	20930000	20932000	AT1G55960	NA	Chr1	20927642	20930017	0.66335	0.655624	22700	interaction103855	1-20932000	+	1852	1-20930000	+	2077	1903	227	0.069862	-1023.4216	0	104	0.069862	10400	-387.68108	1221	1283	-61.5893	12300	-382	0.933697561632379	9.84496017926293e-07	1.63932296584619	6.49697334130723e-08
7802000	7804000	AT5G23190	yes	Chr5	7803140	7805815	1.62055	1.28225	7798000	7800000	AT5G23170	yes	Chr5	7798196	7799448	3.37022	1.54587	14400	interaction509521	5-7802000	+	1187	5-7798000	+	2522	3768	144	0.069862	-584.976817	0	52	0.069862	5200	-159.422719	631	1026	-61.3665	9200	-218	-5.24691656224615	1.76041850945074e-28	-1.16518596577042	1.69619418858663e-05
12272000	12274000	AT4G23515	yes	Chr4	12271381	12272842	1.14229	1.08451	12268000	12270000	AT4G23510	NA	Chr4	12267515	12270543	0.719229	0.754315	12400	interaction435830	4-12272000	+	2239	4-12268000	+	1648	3494	124	0.069862	-482.709829	0	40	0.069862	4000	-112.20455	1101	830	-61.3557	8400	-180	-4.95173302458938	1.09423767812553e-13	-5.08941787307712	1.58552411777497e-85
22646000	22648000	AT1G61380	NA	Chr1	22646071	22649521	0.689681	0.638807	22642000	22644000	AT1G61370	NA	Chr1	22642095	22645147	0.672252	0.639721	10700	interaction112007	1-22646000	+	2405	1-22642000	+	1765	3797	107	0.069862	-400.459399	0	31	0.069862	3100	-79.495048	1477	1013	-61.0276	7600	-150	1.81414926536058	1.03066136546542e-08	-1.9328851201343	4.39052268633757e-13
8402000	8404000	AT1G23760	yes	Chr1	8402045	8404301	1.82736	1.44077	8400000	8402000	AT1G23750	NA	Chr1	8400150	8401487	0.824421	1.18003	24700	interaction44013	1-8402000	+	2617	1-8400000	+	2087	2053	247	0.069862	-1133.538026	0	118	0.069862	11800	-454.857445	1373	1248	-60.7642	12900	-424	-3.77161207208149	8.03790585544537e-11	-1.25300964720288	7.53580461650624e-08
19212000	19214000	AT2G46760	yes	Chr2	19213027	19215166	4.08373	4.57973	19210000	19212000	AT2G46750	yes	Chr2	19208319	19210958	4.33595	3.92432	7700	interaction249540	2-19212000	+	2006	2-19210000	+	1595	2791	77	0.069862	-263.369217	0	17	0.069862	1700	-34.664	755	564	-60.1092	6000	-98	-1.73174590036166	1.06387181633293e-08	-5.48862639327275	2.85072547420192e-43
8320000	8322000	AT4G14465	yes	Chr4	8320629	8322201	4.9118	1.18567	8312000	8314000	AT4G14455	yes	Chr4	8310335	8312321	0.889029	0.812261	11000	interaction415344	4-8320000	+	2725	4-8312000	+	1954	7987	110	0.069862	-414.385219	0	33	0.069862	3300	-86.534648	985	1116	-59.7912	7700	-154	-3.11314217606891	3.22211671070818e-56	-0.68485164265565	6.8612714546234e-09
5676000	5678000	AT3G16660	yes	Chr3	5676828	5677921	2.99988	3.90268	5674000	5676000	AT3G16650	yes	Chr3	5671066	5675324	1.2068	1.30912	22800	interaction281727	3-5676000	+	2144	3-5674000	+	2276	1987	228	0.069862	-1026.935813	0	106	0.069862	10600	-397.426317	1160	1341	-59.3173	12200	-384	9.50322958528906	1.908853410648e-72	1.23041196076032	3.47586838961828e-05
20368000	20370000	AT3G54970	NA	Chr3	20368167	20370098	0.738041	0.730804	20366000	20368000	AT3G54960	NA	Chr3	20363309	20366840	0.70427	0.720176	18100	interaction358145	3-20368000	+	2327	3-20366000	+	2034	1925	181	0.069862	-772.609688	0	75	0.069862	7500	-255.391989	1189	1100	-59.3037	10600	-288	0.840580867739914	2.56975986507978e-06	-2.58269043941385	6.64960500827512e-38
838000	840000	AT4G01930	yes	Chr4	838801	840760	1.18708	1.04285	834000	836000	AT4G01925	yes	Chr4	833172	834340	1.30554	1.6712	17000	interaction378287	4-838000	+	2083	4-834000	+	2644	4134	170	0.069862	-714.577647	0	68	0.069862	6800	-224.924145	1139	1355	-59.3034	10200	-266	-3.06874693366252	7.60593157015342e-13	-5.48512005805484	9.7977823966127e-35
18644000	18646000	AT2G45220	yes	Chr2	18644083	18646447	3.80827	3.51542	18642000	18644000	AT2G45210	yes	Chr2	18641565	18642704	2.46541	1.9262	10300	interaction246898	2-18644000	+	1749	2-18642000	+	1202	2039	103	0.069862	-383.020074	0	30	0.069862	3000	-76.41716	754	524	-59.1302	7300	-142	-3.87216636001235	3.92521134248721e-60	-2.83931428153239	3.19174029693454e-10
8812000	8814000	AT3G24310	yes	Chr3	8811130	8812364	0.993493	0.819935	8806000	8808000	AT3G24300	yes	Chr3	8805630	8807388	2.83058	3.66072	7933.378144	interaction298583	3-8812000	+	1417	3-8806000	+	4112	6119	83	0.073091	-290.27318	0	19	0.069862	1900	-40.580913	532	1873	-59.0199	6033.38	-108	-5.32193575608678	8.4510360278859e-20	-5.43632854005153	7.97428379867025e-45
7426000	7428000	AT5G22410	yes	Chr5	7426313	7427964	1.34515	1.74772	7424000	7426000	AT5G22400	NA	Chr5	7422715	7425467	0.781553	0.742633	22200	interaction507433	5-7426000	+	2613	5-7424000	+	1903	1858	222	0.069862	-995.316783	0	103	0.069862	10300	-383.457	1510	1097	-58.4588	11900	-372	-4.94952794827295	1.39791296251587e-69	-0.350481499851885	0.00662137983620249
19420000	19422000	AT5G47960	NA	Chr5	19421383	19422533	0.977518	0.853236	19416000	19418000	AT5G47950	NA	Chr5	19417030	19418546	0.688836	0.709781	4700	interaction566815	5-19420000	+	1057	5-19416000	+	1242	4418	47	0.069862	-138.776633	0	6	0.069862	600	-7.454147	402	558	-58.4413	4100	-52	-3.12527016889248	6.29902102015014e-33	-5.49938194287678	6.04104860323118e-16
3508000	3510000	AT3G11200	yes	Chr3	3508041	3510627	0.921208	0.796048	3504000	3506000	AT3G11180	yes	Chr3	3504203	3507113	3.20553	3.51892	11600	interaction270383	3-3508000	+	1672	3-3504000	+	1915	3796	116	0.069862	-443.720227	0	37	0.069862	3700	-100.990678	931	974	-58.2898	7900	-166	-0.315677048208797	0.000734297396820059	-2.73108275848156	0.00293878130517751
760000	762000	AT4G01760	yes	Chr4	759130	761134	0.618727	0.684339	756000	758000	AT4G01750	NA	Chr4	756362	758590	0.545166	0.615304	18900	interaction377849	4-760000	+	1952	4-756000	+	2211	3596	189	0.069862	-815.538503	0	81	0.069862	8100	-282.237602	1021	1185	-58.2405	10800	-304	-5.72592157543928	5.36910080716058e-10	-2.48503429956736	8.6247274922978e-12
24376000	24378000	AT5G60660	yes	Chr5	24375456	24376989	2.42241	2.68681	24372000	24374000	AT5G60640	yes	Chr5	24371006	24374038	0.912186	0.801524	13400	interaction592337	5-24376000	+	2092	5-24372000	+	2028	3763	134	0.069862	-531.099929	0	47	0.069862	4700	-138.853912	1003	982	-58.1748	8700	-198	-4.72139468583952	5.0451770219603e-33	-0.505753486341504	3.23397644802753e-05
10586000	10588000	AT2G24860	yes	Chr2	10586774	10588329	0.778642	0.793718	10584000	10586000	AT2G24850	yes	Chr2	10582829	10585216	2.45691	3.01818	8800	interaction204430	2-10586000	+	932	2-10584000	+	2067	2418	88	0.069862	-314.302251	0	23	0.069862	2300	-53.126268	420	1073	-58.1494	6500	-116	2.32642158314041	3.12620640429045e-22	3.25011111831885	0.000661165291568242
7276000	7278000	AT1G20910	yes	Chr1	7276942	7281138	0.918606	0.711699	7274000	7276000	AT1G20900	yes	Chr1	7272555	7274072	4.4353	1.19888	17000	interaction38191	1-7276000	+	2095	1-7274000	+	1825	2377	170	0.069862	-715.601746	0	69	0.069862	6900	-230.048751	1039	817	-58.1484	10100	-268	0.399062873589497	0.00270658088008102	-3.48516721079065	3.43517905994487e-23
20382000	20384000	AT5G50120	yes	Chr5	20382614	20383874	2.8192	1.82794	20376000	20378000	AT5G50110	NA	Chr5	20373514	20376207	0.861364	0.835847	11798.794266	interaction572297	5-20382000	+	2725	5-20376000	+	2044	6500	118	0.06987	-452.624162	0	38	0.069862	3800	-104.507633	1377	1192	-58.1229	7998.79	-168	-3.01383772415288	2.14160467945371e-17	1.58873797172413	1.16603888469373e-26
2540000	2542000	AT3G07970	yes	Chr3	2541005	2543432	2.01673	2.05675	2536000	2538000	AT3G07960	yes	Chr3	2534886	2538372	0.626997	0.663109	12800	interaction264798	3-2540000	+	1520	3-2536000	+	2746	3883	128	0.069862	-502.817929	0	44	0.069862	4400	-127.555416	732	1610	-57.9453	8400	-188	-4.46865794052111	1.53013124943866e-28	-0.908032231342215	0.00236808387653802
5588000	5590000	AT3G16450	yes	Chr3	5588393	5590055	3.42818	3.68913	5578000	5580000	AT3G16420	yes	Chr3	5579385	5580953	2.04457	1.96203	7100	interaction281243	3-5588000	+	2604	3-5578000	+	1691	9722	71	0.069862	-237.137023	0	15	0.069862	1500	-29.008316	896	533	-57.9229	5600	-88	-3.26200979429494	9.57923125397121e-16	-1.48347976613498	0.00673681941841922
2174000	2176000	AT5G07010	yes	Chr5	2174677	2176106	3.29619	2.65725	2172000	2174000	AT5G07000	yes	Chr5	2171402	2172939	2.90816	2.95935	19300	interaction479607	5-2174000	+	2418	5-2172000	+	1874	2781	193	0.069862	-837.386478	0	84	0.069862	8400	-296.051871	1250	939	-57.8629	10900	-314	-2.64682320157937	9.65636436502775e-08	2.5688156793502	7.19202779999131e-18
19944000	19946000	AT3G53840	yes	Chr3	19945570	19947719	0.830154	0.899774	19942000	19944000	AT3G53830	NA	Chr3	19940813	19943799	0.801591	0.707594	19200	interaction355780	3-19944000	+	1563	3-19942000	+	2221	2304	192	0.069862	-834.102209	0	84	0.069862	8400	-296.368489	868	1152	-57.6801	10800	-312	-0.986037693173714	0.0470960118013918	2.65941638010249	1.0280114012489e-12
16064000	16066000	AT4G33350	NA	Chr4	16064547	16066767	0.802503	0.816848	16060000	16062000	AT4G33330	yes	Chr4	16059753	16063070	2.1475	2.20748	16200	interaction455937	4-16064000	+	2206	4-16060000	+	2519	4147	162	0.069862	-672.636319	0	64	0.069862	6400	-207.867816	1161	1293	-57.6193	9800	-252	2.12551440513884	7.7867188257146e-68	-2.48723770318895	5.25679695764001e-12
832000	834000	AT4G01925	yes	Chr4	833172	834340	1.30554	1.6712	830000	832000	AT4G01920	yes	Chr4	828889	831200	1.47938	1.56298	14200	interaction378251	4-832000	+	2276	4-830000	+	2058	2357	142	0.069862	-571.02949	0	52	0.069862	5200	-158.497075	1122	1123	-57.5587	9000	-214	-5.48512005805484	9.7977823966127e-35	-3.01021336269712	1.00257740500067e-20
26062000	26064000	AT5G65220	NA	Chr5	26061228	26062682	0.820801	0.970481	26058000	26060000	AT5G65210	NA	Chr5	26057622	26061104	0.725557	0.853663	3200	interaction600504	5-26062000	+	1195	5-26058000	+	874	3965	32	0.069862	-83.066712	0	2	0.069862	200	-1.330895	543	305	-57.0874	3000	-30	3.89506982732585	4.74612137549704e-72	-3.29426919101641	5.32433343838179e-115
4334000	4336000	AT1G12730	NA	Chr1	4334614	4337844	0.843585	0.732904	4324000	4326000	AT1G12700	NA	Chr1	4323555	4326333	0.742879	0.621685	6100	interaction22799	1-4334000	+	1439	1-4324000	+	2413	10069	61	0.069862	-194.97134	0	11	0.069862	1100	-18.472257	810	1388	-57.0654	5000	-72	0.612526162464405	0.00118671692658472	0.850753909001535	2.52863766529496e-08
23652000	23654000	AT5G58510	NA	Chr5	23648152	23654552	0.761375	0.739413	23646000	23648000	AT5G58500	yes	Chr5	23645534	23646083	2.54436	1.76229	6800	interaction588598	5-23652000	+	2194	5-23646000	+	1434	6183	68	0.069862	-224.509538	0	14	0.069862	1400	-26.250929	1171	616	-57.0601	5400	-84	-0.29791007284087	0.00903853017760742	-2.38187723827156	2.03622956498983e-08
12054000	12056000	AT2G28270	yes	Chr2	12053541	12054398	1.29038	1.74163	12048000	12050000	AT2G28260	NA	Chr2	12049988	12052453	0.616403	0.642023	7500	interaction211897	2-12054000	+	2424	2-12048000	+	1515	5914	75	0.069862	-254.691088	0	17	0.069862	1700	-34.614484	1156	730	-56.9705	5800	-94	-6.92204741112679	1.29172120724434e-16	0.663981907710822	0.0189849494862896
18334000	18336000	AT5G45275	NA	Chr5	18334404	18337380	0.668017	0.713901	18332000	18334000	AT5G45260	NA	Chr5	18326202	18332609	0.728434	0.753767	28725.440163	interaction561698	5-18334000	+	2739	5-18332000	+	2343	2033	331	0.080502	-1618.668157	0	154	0.069862	15400	-635.668682	1601	1271	-56.9061	13325.4	-606	-0.69001163771704	0.0141607068534386	-0.237665949720985	0.0107898142601328
3448000	3450000	AT1G10480	yes	Chr1	3449690	3451226	4.30043	2.68336	3432000	3434000	AT1G10450	NA	Chr1	3431779	3438370	0.754382	0.672964	3200	interaction18052	1-3448000	+	1789	1-3432000	+	1760	15717	32	0.069862	-82.793378	0	2	0.069862	200	-1.330894	495	923	-56.5806	3000	-30	-4.70859978171962	4.53585291539041e-11	-0.322848026035472	0.00741571675122111
24782000	24784000	AT1G66440	yes	Chr1	24782170	24784351	1.91077	2.35922	24780000	24782000	AT1G66430	yes	Chr1	24778270	24780629	0.80816	0.792057	17400	interaction123331	1-24782000	+	1588	1-24780000	+	1868	1787	174	0.069862	-737.903499	0	73	0.069862	7300	-248.32147	654	964	-56.4709	10100	-276	-6.15921463922013	2.69479729087011e-22	2.63307126249562	3.57641531019027e-152
386000	388000	AT5G02020	NA	Chr5	386017	388123	0.786537	0.758014	384000	386000	AT5G02010	NA	Chr5	383152	385850	0.784871	0.708233	20900	interaction470022	5-386000	+	1123	5-384000	+	2607	1744	209	0.069862	-932.627241	0	98	0.069862	9800	-363.890597	591	1588	-56.4355	11100	-348	0.821787103811388	0.0082067946495729	0.433195593898669	0.00213994927120435
10868000	10870000	AT1G30650	yes	Chr1	10868302	10871297	3.39071	5.19602	10862000	10864000	AT1G30640	NA	Chr1	10860654	10864700	0.81571	0.777133	7400	interaction57021	1-10868000	+	3073	1-10862000	+	901	5602	74	0.069862	-251.56176	0	17	0.069862	1700	-34.722553	1359	445	-56.3291	5700	-94	-4.31342891170294	1.22380843781736e-114	-1.3834219904138	5.19882775672274e-17
9036000	9038000	AT5G25900	NA	Chr5	9036017	9038406	0.78213	0.671055	9032000	9034000	AT5G25890	yes	Chr5	9033414	9034834	1.64443	0.75621	10100	interaction515744	5-9036000	+	1409	5-9032000	+	1860	3644	101	0.069862	-372.946488	0	30	0.069862	3000	-76.264136	647	810	-56.2115	7100	-138	0.848858813650564	0.000299911069263166	-3.30079666589585	4.28756742750585e-113
62000	64000	AT3G01180	NA	Chr3	62244	65845	0.720573	0.644444	60000	62000	AT3G01175	yes	Chr3	59470	60845	1.11425	0.919361	12900	interaction252265	3-62000	+	2418	3-60000	+	1096	2182	129	0.069862	-509.986994	0	46	0.069862	4600	-135.590204	1086	613	-56.201	8300	-190	1.42852377047572	2.75252368669877e-19	-5.33745041793753	4.09455494165615e-43
18644000	18646000	AT3G50300	yes	Chr3	18643954	18645406	1.09228	0.972185	18638000	18640000	AT3G50280	yes	Chr3	18637853	18639185	0.917462	0.900601	8300	interaction349198	3-18644000	+	2300	3-18638000	+	1397	5654	83	0.069862	-290.308144	0	21	0.069862	2100	-46.644666	1085	620	-56.1569	6200	-108	-5.46401721719268	4.02685201755766e-62	-4.13983450195891	1.05636314555195e-11
9356000	9358000	AT1G26960	NA	Chr1	9355919	9357460	0.654321	0.869791	9344000	9346000	AT1G26940	NA	Chr1	9343125	9345145	0.815754	0.763922	2600	interaction48934	1-9356000	+	1511	1-9344000	+	1262	11973	26	0.069862	-62.463841	0	1	0.069862	100	-0.458275	767	727	-56.0967	2500	-22	-1.62213184899192	2.95861283891928e-11	-0.813955801071185	5.60026010080776e-07
10510000	10512000	AT1G30000	NA	Chr1	10509210	10512468	0.738206	0.753607	10500000	10502000	AT1G29970	yes	Chr1	10498350	10501452	0.84419	0.770751	2600	interaction55179	1-10510000	+	1535	1-10500000	+	1291	9843	26	0.069862	-62.458415	0	1	0.069862	100	-0.458279	979	734	-56.0933	2500	-22	-0.622951809516665	2.55943104970884e-08	-0.774419524631701	0.0495218478347484
5596000	5598000	AT3G16470	NA	Chr3	5595928	5599224	0.795144	0.84749	5592000	5594000	AT3G16460	yes	Chr3	5592581	5595717	1.34562	1.18725	18800	interaction281315	3-5596000	+	1950	3-5592000	+	2376	3633	188	0.069862	-810.205746	0	82	0.069862	8200	-287.372355	900	857	-55.9638	10600	-302	-1.13606916250919	0.0117718248793701	-2.87890856891917	2.02134473310579e-10
9158000	9160000	AT2G21400	yes	Chr2	9158389	9159701	1.02961	1.46566	9156000	9158000	AT2G21390	NA	Chr2	9152005	9156878	0.674111	0.652874	22200	interaction197193	2-9158000	+	2116	2-9156000	+	2175	2154	222	0.069862	-993.926523	0	105	0.069862	10500	-392.540799	1191	1235	-55.6256	11700	-372	-3.25923380176015	1.73581170613081e-05	-0.441964962366953	2.19988278504737e-05
4850000	4852000	AT1G14185	NA	Chr1	4850273	4852096	0.59072	0.654349	4848000	4850000	AT1G14180	NA	Chr1	4847161	4849207	0.717262	0.644963	20104.436008	interaction25377	1-4850000	+	2835	1-4848000	+	2394	2005	245	0.085137	-1120.305919	0	92	0.069862	9200	-331.571939	1354	1237	-55.5153	10904.4	-420	-3.08515782708046	1.45284032983534e-36	0.70128890925403	3.24252131602754e-05
13508000	13510000	AT4G26880	yes	Chr4	13508264	13508723	4.10667	5.42657	13506000	13508000	AT4G26870	yes	Chr4	13505330	13507870	0.725021	0.709232	13200	interaction442647	4-13508000	+	1281	4-13506000	+	2116	1874	132	0.069862	-523.774363	0	48	0.069862	4800	-143.422434	628	1136	-55.2774	8400	-196	-5.13080037666691	1.26540682530994e-08	0.389601169520076	0.0104011113511853
10568000	10570000	AT4G19380	yes	Chr4	10568364	10572412	2.28881	2.53666	10566000	10568000	AT4G19370	yes	Chr4	10566149	10567838	0.973197	0.925706	8200	interaction427179	4-10568000	+	1231	4-10566000	+	1053	2827	82	0.069862	-286.624193	0	21	0.069862	2100	-46.689382	726	543	-55.1971	6100	-106	4.32743472258601	1.1802829061344e-28	-2.43964273129101	1.60024654610277e-20
1412000	1414000	AT5G04860	NA	Chr5	1411564	1414677	0.615474	0.664622	1408000	1410000	AT5G04850	NA	Chr5	1408018	1409893	0.695518	0.715134	9800	interaction475354	5-1412000	+	2886	5-1408000	+	1308	3532	98	0.069862	-359.182726	0	29	0.069862	2900	-72.814731	1507	650	-54.9576	6900	-134	-2.92835917739269	7.78029706188008e-135	-0.328470584210279	0.0148462937844358
26060000	26062000	AT1G69320	yes	Chr1	26061861	26062514	4.13498	4.90981	26058000	26060000	AT1G69310	yes	Chr1	26054307	26058105	4.01642	2.58016	4200	interaction129982	1-26060000	+	1042	1-26058000	+	886	2421	42	0.069862	-119.689921	0	5	0.069862	500	-5.629206	558	335	-54.9095	3700	-44	6.23259643418427	8.96362756017941e-11	-0.467089401365505	0.0405557006710385
22682000	22684000	AT3G61280	yes	Chr3	22680959	22683769	1.67981	2.18949	22678000	22680000	AT3G61270	yes	Chr3	22678150	22680379	2.56487	1.98243	8400	interaction370365	3-22682000	+	2124	3-22678000	+	1179	3640	84	0.069862	-295.271229	0	22	0.069862	2200	-49.885187	1092	467	-54.9028	6200	-110	-1.79642521068239	0.00037783729459427	-5.83984563850522	1.85460330388429e-58
7306000	7308000	AT3G20860	yes	Chr3	7306146	7308434	0.734124	0.709456	7302000	7304000	AT3G20840	yes	Chr3	7300674	7303693	3.52684	3.42983	11500	interaction290775	3-7306000	+	1862	3-7302000	+	2636	3851	115	0.069862	-438.484562	0	38	0.069862	3800	-104.718332	872	1256	-54.7818	7700	-164	-0.533832632710284	0.000152980928902656	-4.94322463609349	6.38179562685809e-10
2210000	2212000	AT1G07200	NA	Chr1	2208718	2212546	0.714931	0.656954	2206000	2208000	AT1G07180	yes	Chr1	2204319	2206934	0.714685	0.714801	19300	interaction11312	1-2210000	+	2443	1-2206000	+	2228	4214	193	0.069862	-835.725176	0	86	0.069862	8600	-304.030748	1295	1332	-54.6395	10700	-312	-0.672217118238668	0.0214057332557356	7.05512935326895	6.94723710227099e-94
8664000	8666000	AT2G20080	yes	Chr2	8662929	8665026	3.73423	2.90399	8658000	8660000	AT2G20060	yes	Chr2	8659042	8661489	0.872848	0.728804	8200	interaction194642	2-8664000	+	2565	2-8658000	+	1503	5630	82	0.069862	-285.659226	0	21	0.069862	2100	-46.592661	1074	743	-54.6382	6100	-106	-6.56655089462458	5.50771107348426e-22	-0.458228403428666	0.00776904011927413
6430000	6432000	AT4G10380	yes	Chr4	6431235	6434822	3.8375	3.01533	6424000	6426000	AT4G10370	yes	Chr4	6423576	6425661	3.26545	3.72237	12900	interaction405658	4-6430000	+	2063	4-6424000	+	2676	6089	129	0.069862	-506.283466	0	46	0.069862	4600	-134.863671	1078	1343	-54.5742	8300	-188	-3.89751858146327	3.61602618721738e-83	-5.67800047562609	4.24588314896379e-33
8942000	8944000	AT1G25460	NA	Chr1	8942810	8944244	0.819392	0.851817	8938000	8940000	AT1G25450	yes	Chr1	8938478	8940387	2.07413	2.51303	15700	interaction46693	1-8942000	+	2016	1-8938000	+	2395	4029	157	0.069862	-647.432668	0	63	0.069862	6300	-203.718887	1118	1325	-54.5252	9400	-242	-1.50565038020354	0.000287784327883827	2.31229351428659	2.35946221461171e-70
314000	316000	AT3G01910	NA	Chr3	314693	317431	0.767438	0.71688	312000	314000	AT3G01900	yes	Chr3	312358	313849	3.43733	3.41898	20467.650544	interaction253656	3-314000	+	1928	3-312000	+	3613	2019	256	0.087381	-1185.852513	0	97	0.069862	9700	-355.865525	960	1565	-54.5079	10767.7	-444	0.624721168629303	2.89606468839473e-08	-5.31643945729938	9.40212091314279e-16
3508000	3510000	AT3G11200	yes	Chr3	3508041	3510627	0.921208	0.796048	3506000	3508000	AT3G11180	yes	Chr3	3504203	3507113	3.20553	3.51892	15000	interaction270384	3-3508000	+	1672	3-3506000	+	1846	1856	150	0.069862	-612.816844	0	59	0.069862	5900	-187.332772	931	944	-54.4334	9100	-228	-0.315677048208797	0.000734297396820059	-2.73108275848156	0.00293878130517751
2892000	2894000	AT1G09000	yes	Chr1	2891036	2895182	0.639958	0.766585	2888000	2890000	AT1G08990	yes	Chr1	2888752	2890959	3.49147	3.59994	12000	interaction15049	1-2892000	+	1865	1-2888000	+	2827	4168	120	0.069862	-462.653441	0	41	0.069862	4100	-115.73362	1093	1112	-54.4056	7900	-172	-1.9051722773868	4.81929379104264e-24	-5.64643580200716	2.23435099124581e-50
29486000	29488000	AT1G78380	yes	Chr1	29486412	29487906	0.735797	0.821028	29484000	29486000	AT1G78370	yes	Chr1	29484268	29485290	1.23386	1.2363	18300	interaction146746	1-29486000	+	1906	1-29484000	+	1929	1885	183	0.069862	-783.789577	0	80	0.069862	8000	-278.30559	955	873	-54.2816	10300	-292	-0.608155786940152	0.00376162338145741	3.78780495993514	2.0071457442816e-204
4780000	4782000	AT1G13970	NA	Chr1	4779522	4782542	0.670224	0.699211	4776000	4778000	AT1G13960	NA	Chr1	4776462	4779400	0.703787	0.691654	17600	interaction24997	1-4780000	+	2282	1-4776000	+	1658	3210	176	0.069862	-748.033442	0	76	0.069862	7600	-260.540797	1002	859	-53.9072	10000	-280	-2.95754587154159	2.99901628207429e-39	-0.630400670550698	4.46936159604711e-09
3878000	3880000	AT1G11545	NA	Chr1	3878549	3880361	0.794367	0.855034	3876000	3878000	AT1G11540	NA	Chr1	3875441	3877155	0.751894	0.608857	7900	interaction20530	1-3878000	+	1363	1-3876000	+	1299	2126	79	0.069862	-272.639927	0	20	0.069862	2000	-43.549968	680	659	-53.5511	5900	-102	-0.916785480535095	0.00735336350231115	-5.10966132867553	2.31118024297249e-58
9616000	9618000	AT5G27280	yes	Chr5	9617485	9618481	0.809557	0.748537	9608000	9610000	AT5G27270	NA	Chr5	9605649	9609787	0.741718	0.695569	5600	interaction519006	5-9616000	+	885	5-9608000	+	2236	8392	56	0.069862	-175.051139	0	10	0.069862	1000	-16.080825	517	1566	-53.5111	4600	-64	1.98766147341873	6.04035279275028e-38	0.732346478263938	1.00205881905164e-09
19208000	19210000	AT2G46750	yes	Chr2	19208319	19210958	4.33595	3.92432	19206000	19208000	AT2G46740	yes	Chr2	19205156	19207455	3.45928	3.45904	21041.928452	interaction249524	2-19208000	+	2952	2-19206000	+	2905	1858	324	0.107573	-1572.377277	0	101	0.069862	10100	-373.775254	1152	1237	-53.5108	10941.9	-588	-5.48862639327275	2.85072547420192e-43	-4.53993022884591	4.61185116946836e-24
6182000	6184000	AT1G17960	yes	Chr1	6180895	6183806	1.61903	1.91665	6178000	6180000	AT1G17950	yes	Chr1	6177616	6179289	4.27583	5.44063	10800	interaction32615	1-6182000	+	1359	1-6178000	+	1905	4027	108	0.069862	-406.211747	0	35	0.069862	3500	-93.922045	702	941	-53.5012	7300	-152	-2.5002915326487	9.01476596013967e-16	-3.96403797126097	8.34913697099766e-19
20924000	20926000	AT5G51520	yes	Chr5	20925979	20926594	3.35483	4.17557	20920000	20922000	AT5G51510	yes	Chr5	20921432	20922978	0.973778	0.898222	5900	interaction574762	5-20924000	+	1779	5-20920000	+	2118	3816	59	0.069862	-186.457182	0	11	0.069862	1100	-18.467169	890	914	-53.4309	4800	-68	-6.13742244318459	2.72828660186915e-20	-0.596873438558416	7.69546636255071e-07
21932000	21934000	AT5G54050	yes	Chr5	21933622	21935995	1.52433	1.73521	21928000	21930000	AT5G54040	yes	Chr5	21928846	21930637	2.61756	2.99639	13278.227422	interaction579935	5-21932000	+	1533	5-21928000	+	3721	3695	136	0.071555	-542.574774	0	50	0.069862	5000	-150.992508	784	1729	-53.335	8278.23	-202	-5.60893544566925	8.33763914908416e-11	-4.83936233201045	7.57037721911891e-16
19454000	19456000	AT3G52490	yes	Chr3	19455698	19458919	3.10217	2.39961	19450000	19452000	AT3G52470	yes	Chr3	19450648	19451982	0.798354	1.0729	2500	interaction353382	3-19454000	+	1522	3-19450000	+	742	4257	25	0.069862	-59.341533	0	1	0.069862	100	-0.457934	730	393	-53.1657	2400	-22	-2.20720391305722	9.88396023194296e-17	-1.68155955929705	8.16045426030195e-34
2584000	2586000	AT5G08070	yes	Chr5	2584884	2585613	4.18134	5.51142	2582000	2584000	AT5G08060	NA	Chr5	2580448	2582564	0.869575	0.91291	23600	interaction481841	5-2584000	+	2699	5-2582000	+	1391	1793	236	0.069862	-1079.109122	0	119	0.069862	11900	-463.285647	1368	786	-53.0606	11700	-404	8.21203851177159	2.7330821889898e-14	-0.396185269046165	0.00793042893902533
3448000	3450000	AT1G10480	yes	Chr1	3449690	3451226	4.30043	2.68336	3434000	3436000	AT1G10450	NA	Chr1	3431779	3438370	0.754382	0.672964	3800	interaction18053	1-3448000	+	1789	1-3434000	+	2765	14280	38	0.069862	-104.317549	0	4	0.069862	400	-3.970487	495	1469	-53.0305	3400	-38	-4.70859978171962	4.53585291539041e-11	-0.322848026035472	0.00741571675122111
8542000	8544000	AT4G14940	yes	Chr4	8541878	8544566	1.64238	1.44871	8538000	8540000	AT4G14930	NA	Chr4	8538585	8541899	0.938208	0.887402	14900	interaction416489	4-8542000	+	2475	4-8538000	+	1224	3572	149	0.069862	-610.278542	0	60	0.069862	6000	-192.176755	1206	688	-52.8559	8900	-228	-1.71201936724676	4.5231287948604e-26	1.86175195395867	6.11777292743452e-51
16080000	16082000	AT2G38390	yes	Chr2	16079680	16081509	4.16453	4.80122	16076000	16078000	AT2G38380	yes	Chr2	16076383	16078583	4.08112	4.36836	9800	interaction233474	2-16080000	+	1153	2-16076000	+	1712	3325	98	0.069862	-359.688857	0	30	0.069862	3000	-76.28486	627	798	-52.8323	6800	-134	-4.82545300089302	6.19415324483994e-27	-5.22914077131304	4.27979735871693e-52
10024000	10026000	AT2G23540	yes	Chr2	10024345	10026233	2.7617	2.65867	10020000	10022000	AT2G23530	yes	Chr2	10020651	10022864	0.816423	0.689696	15000	interaction201516	2-10024000	+	1896	2-10020000	+	2228	4151	150	0.069862	-611.990428	0	60	0.069862	6000	-191.24424	1069	1287	-52.5327	9000	-228	-5.39476212367748	2.47617893809495e-36	-0.906404115724663	0.000236450283087264
20154000	20156000	AT1G54000	yes	Chr1	20154168	20156419	3.55374	1.45037	20150000	20152000	AT1G53990	yes	Chr1	20151015	20152752	4.02815	2.7653	4700	interaction99547	1-20154000	+	1209	1-20150000	+	1212	3883	47	0.069862	-138.649827	0	7	0.069862	700	-9.438221	411	348	-52.5053	4000	-50	-5.58651785762639	2.25931212151463e-43	-5.66365969115388	5.40753197077067e-47
23000000	23002000	AT1G62262	yes	Chr1	23000156	23002093	1.91699	2.0834	22998000	23000000	AT1G62260	yes	Chr1	22997825	22999796	0.743904	0.732678	17400	interaction113916	1-23000000	+	1493	1-22998000	+	2878	1742	174	0.069862	-738.549208	0	76	0.069862	7600	-260.772002	805	1478	-52.466	9800	-276	-4.15770820390964	2.83363884946504e-19	-0.578347262017796	0.00600262599986917
14762000	14764000	AT4G30170	yes	Chr4	14762840	14764627	3.7265	3.25773	14760000	14762000	AT4G30160	NA	Chr4	14753348	14760189	0.894723	0.747353	8800	interaction449330	4-14762000	+	1440	4-14760000	+	1024	1813	88	0.069862	-313.917926	0	25	0.069862	2500	-59.655412	493	409	-52.4542	6300	-116	-5.06996518156847	1.12933663722793e-88	-0.442386708423899	4.16118121638216e-08
17154000	17156000	AT2G41150	NA	Chr2	17153843	17155983	0.667232	0.653912	17150000	17152000	AT2G41140	NA	Chr2	17150386	17153690	0.785059	0.744667	13500	interaction239210	2-17154000	+	2231	2-17150000	+	1769	3942	135	0.069862	-536.749223	0	51	0.069862	5100	-154.779062	1283	900	-52.3231	8400	-200	-1.7116321940601	6.06319815383425e-07	0.67793769979011	9.27157260591939e-06
19480000	19482000	AT2G47470	NA	Chr2	19481419	19484015	0.766339	0.733752	19478000	19480000	AT2G47460	yes	Chr2	19476336	19479478	2.67236	1.24375	8200	interaction250851	2-19480000	+	1321	2-19478000	+	1074	1767	82	0.069862	-286.560678	0	22	0.069862	2200	-49.935001	667	422	-52.2845	6000	-106	-0.788209239805136	9.92115020399305e-15	-4.13586426953477	4.33256928992693e-26
10244000	10246000	AT1G29290	yes	Chr1	10244965	10245572	1.97106	1.83513	10236000	10238000	AT1G29280	yes	Chr1	10236366	10237467	3.80834	2.6211	4700	interaction53703	1-10244000	+	1108	1-10236000	+	2195	8386	47	0.069862	-138.730149	0	7	0.069862	700	-9.431921	405	825	-52.2132	4000	-52	-3.19393873270419	7.57763474361409e-13	-4.77598617876854	3.13439306502985e-45
18640000	18642000	AT3G50290	yes	Chr3	18640171	18640993	1.69979	2.08384	18638000	18640000	AT3G50280	yes	Chr3	18637853	18639185	0.917462	0.900601	12600	interaction349170	3-18640000	+	1528	3-18638000	+	1397	1690	126	0.069862	-493.426099	0	46	0.069862	4600	-135.57097	789	620	-52.1754	8000	-184	-4.56364031233313	1.09558635489172e-14	-4.13983450195891	1.05636314555195e-11
3504000	3506000	AT3G11180	yes	Chr3	3504203	3507113	3.20553	3.51892	3502000	3504000	AT3G11170	NA	Chr3	3499800	3502452	0.778218	0.747756	10800	interaction270357	3-3504000	+	1915	3-3502000	+	1013	2332	108	0.069862	-407.733592	0	36	0.069862	3600	-97.76642	974	567	-52.1149	7200	-152	-2.73108275848156	0.00293878130517751	3.6391632669472	3.08221357896387e-259
314000	316000	AT3G01910	NA	Chr3	314693	317431	0.767438	0.71688	310000	312000	AT3G01890	yes	Chr3	310014	311976	0.776691	0.761948	12888.003774	interaction253655	3-314000	+	1928	3-310000	+	2981	4013	133	0.072096	-526.366398	0	48	0.069862	4800	-142.799702	960	1461	-52.0239	8088	-196	0.624721168629303	2.89606468839473e-08	0.527765791724331	0.0456335235458571
888000	890000	AT3G03660	yes	Chr3	889508	892162	4.52354	3.79489	886000	888000	AT3G03650	yes	Chr3	884132	886410	0.697371	0.851205	11600	interaction256552	3-888000	+	1981	3-886000	+	1729	1724	116	0.069862	-443.584695	0	40	0.069862	4000	-112.262598	993	781	-52.0216	7600	-166	-3.93615231164602	3.91746965450377e-06	-5.38687859678207	4.44706748222612e-21
22000	24000	AT5G01060	yes	Chr5	22739	24847	0.673628	0.711924	18000	20000	AT5G01050	yes	Chr5	18085	20812	2.42681	2.80078	9000	interaction468311	5-22000	+	1386	5-18000	+	2436	3954	90	0.069862	-322.031605	0	26	0.069862	2600	-62.718362	617	1028	-51.9791	6400	-120	-5.03021773163296	1.26711232537189e-21	-5.2686955537035	9.29581257321304e-49
17924000	17926000	AT5G44490	yes	Chr5	17924034	17925843	1.27123	1.21062	17922000	17924000	AT5G44480	yes	Chr5	17921514	17923643	0.742766	0.794697	6900	interaction559460	5-17924000	+	1506	5-17922000	+	1034	2243	69	0.069862	-229.431526	0	16	0.069862	1600	-31.876255	835	404	-51.8275	5300	-86	1.7196515889442	0.00113021357806017	-4.58163329668909	2.13489174042762e-67
288000	290000	AT4G00700	NA	Chr4	286050	289514	0.479349	0.587243	284000	286000	AT4G00695	yes	Chr4	283913	285975	0.856282	1.01558	8900	interaction375627	4-288000	+	2051	4-284000	+	833	3606	89	0.069862	-319.413555	0	26	0.069862	2600	-63.066225	1180	366	-51.7191	6300	-118	-4.91559791973036	5.21504240089638e-29	-1.42174942231642	0.0127841707820891
13794000	13796000	AT2G32500	NA	Chr2	13794425	13797227	0.702578	0.629974	13792000	13794000	AT2G32487	yes	Chr2	13791886	13793177	2.0652	1.67945	19300	interaction221098	2-13794000	+	2952	2-13792000	+	1301	2350	193	0.069862	-842.098337	0	90	0.069862	9000	-324.420535	1587	773	-51.621	10300	-314	3.60480687296202	1.40100039113094e-51	3.50106738537219	6.49536549438714e-12
1932000	1934000	AT3G06370	yes	Chr3	1930395	1934073	1.58613	0.932447	1928000	1930000	AT3G06360	yes	Chr3	1928901	1929446	3.80859	2.53403	5700	interaction261815	3-1932000	+	1666	3-1928000	+	810	4045	57	0.069862	-179.32773	0	11	0.069862	1100	-18.5742	704	291	-51.5942	4600	-66	-1.52345035664507	6.84795703036488e-05	-1.06891077417998	0.0112317561922624
19652000	19654000	AT1G52760	NA	Chr1	19651324	19652743	0.695941	0.765691	19648000	19650000	AT1G52750	NA	Chr1	19646464	19649261	0.621159	0.611588	6500	interaction97264	1-19652000	+	1440	1-19648000	+	2184	3749	65	0.069862	-211.749707	0	14	0.069862	1400	-26.216368	841	1167	-51.5468	5100	-78	-1.58773049179787	2.75166697227978e-20	-1.23319155041769	4.74672187330989e-05
1740000	1742000	AT5G05790	yes	Chr5	1740571	1742028	2.37945	1.49239	1738000	1740000	AT5G05780	yes	Chr5	1735724	1738700	1.03167	0.960895	12100	interaction477275	5-1740000	+	2278	5-1738000	+	953	2226	121	0.069862	-471.435593	0	44	0.069862	4400	-128.473986	1176	430	-51.5304	7700	-176	-2.52654762866874	1.5686851727405e-22	-0.293130026426024	3.78282440768148e-06
1690000	1692000	AT1G05650	yes	Chr1	1690263	1692126	3.11406	3.16929	1688000	1690000	AT1G05640	NA	Chr1	1687435	1689501	0.497483	0.63219	13500	interaction8410	1-1690000	+	1270	1-1688000	+	2655	2085	135	0.069862	-538.859436	0	52	0.069862	5200	-159.478518	615	1473	-51.4947	8300	-202	-5.49726046873814	1.01035574274976e-09	-0.852887190721377	8.72933397216592e-06
10262000	10264000	AT2G24140	NA	Chr2	10262553	10264033	0.673252	0.72058	10258000	10260000	AT2G24130	yes	Chr2	10258147	10261220	0.74156	0.736272	22324.97487	interaction202650	2-10262000	+	1807	2-10258000	+	3479	3890	252	0.078859	-1164.333112	0	113	0.069862	11300	-431.716287	1034	2025	-51.3567	11025	-436	-2.83096196278023	3.91617479764236e-13	-3.45586275371613	1.6222001979483e-06
9816000	9818000	AT3G26720	NA	Chr3	9816580	9823186	0.811297	0.755546	9814000	9816000	AT3G26710	NA	Chr3	9813370	9814750	0.708969	0.710977	12500	interaction303428	3-9816000	+	1639	3-9814000	+	1837	2286	125	0.069862	-487.642618	0	46	0.069862	4600	-135.032772	915	1060	-50.743	7900	-182	-1.00693835833735	1.04326948185909e-11	4.09301176651597	8.43828003913231e-207
1930000	1932000	AT3G06370	yes	Chr3	1930395	1934073	1.58613	0.932447	1928000	1930000	AT3G06360	yes	Chr3	1928901	1929446	3.80859	2.53403	6800	interaction261806	3-1930000	+	1515	3-1928000	+	810	2086	68	0.069862	-225.753572	0	16	0.069862	1600	-31.981205	752	291	-50.697	5200	-84	-1.52345035664507	6.84795703036488e-05	-1.06891077417998	0.0112317561922624
5592000	5594000	AT3G16460	yes	Chr3	5592581	5595717	1.34562	1.18725	5588000	5590000	AT3G16450	yes	Chr3	5588393	5590055	3.42818	3.68913	10891.832987	interaction281280	3-5592000	+	2376	3-5588000	+	2604	3811	121	0.077612	-466.658201	0	37	0.069862	3700	-101.050886	857	896	-50.6819	7191.83	-174	-2.87890856891917	2.02134473310579e-10	-3.26200979429494	9.57923125397121e-16
11772000	11774000	AT1G32550	yes	Chr1	11771765	11774187	0.911195	0.777983	11760000	11762000	AT1G32530	yes	Chr1	11759458	11762607	0.785463	0.78396	3700	interaction61534	1-11772000	+	1028	1-11760000	+	1682	12097	37	0.069862	-100.925053	0	4	0.069862	400	-3.969188	617	1016	-50.5255	3300	-36	4.51888540591671	9.12797570310941e-279	0.638466749088788	9.85662952273591e-06
28062000	28064000	AT1G74690	NA	Chr1	28061158	28064625	0.707097	0.661922	28046000	28048000	AT1G74660	yes	Chr1	28047575	28048127	5.09748	1.42021	2400	interaction140133	1-28062000	+	2108	1-28046000	+	653	15335	24	0.069862	-56.137253	0	1	0.069862	100	-0.457339	1214	218	-50.4286	2300	-20	0.445271254637966	0.0498217774794216	-2.3889664842997	6.19477835729095e-15
796000	798000	AT4G01850	NA	Chr4	796096	798286	0.635836	0.669275	794000	796000	AT4G01840	NA	Chr4	793260	795139	0.669651	0.783715	13000	interaction378054	4-796000	+	2159	4-794000	+	1039	1861	130	0.069862	-515.429569	0	50	0.069862	5000	-152.229241	1126	442	-50.3273	8000	-192	-0.778153860840848	4.05922811301713e-12	0.633027000741835	5.6706664707764e-05
24214000	24216000	AT1G65190	yes	Chr1	24215643	24217328	1.54285	2.79204	24212000	24214000	AT1G65180	yes	Chr1	24211740	24213870	2.01947	2.00283	13300	interaction120289	1-24214000	+	1002	1-24212000	+	3307	2008	133	0.069862	-530.816755	0	52	0.069862	5200	-160.133646	475	2182	-50.244	8100	-198	4.18170776998869	1.82310101554792e-78	-2.29343171082555	2.00621168057258e-30
6180000	6182000	AT1G17960	yes	Chr1	6180895	6183806	1.61903	1.91665	6176000	6178000	AT1G17950	yes	Chr1	6177616	6179289	4.27583	5.44063	8000	interaction32603	1-6180000	+	2163	1-6176000	+	789	3635	80	0.069862	-278.707935	0	22	0.069862	2200	-49.986352	1004	384	-50.1612	5800	-104	-2.5002915326487	9.01476596013967e-16	-3.96403797126097	8.34913697099766e-19
13840000	13842000	AT2G32620	yes	Chr2	13840743	13844324	2.21868	2.60634	13838000	13840000	AT2G32610	yes	Chr2	13836233	13839513	2.38314	2.91109	17000	interaction221346	2-13840000	+	2036	2-13838000	+	1531	2039	170	0.069862	-717.206659	0	75	0.069862	7500	-255.868281	1155	929	-50.1333	9500	-268	-6.0896286570664	3.04853691333378e-17	-5.04225136228166	1.39632170723707e-14
17474000	17476000	AT4G37080	NA	Chr4	17473119	17476952	0.73028	0.738448	17466000	17468000	AT4G37070	yes	Chr4	17464784	17467109	1.89983	2.27564	4600	interaction462969	4-17474000	+	1836	4-17466000	+	986	7945	46	0.069862	-134.952127	0	7	0.069862	700	-9.430028	907	426	-50.1316	3900	-50	2.02756900397743	4.34282807439343e-74	-5.70209991807937	5.26376140523463e-22
10264000	10266000	AT4G18650	yes	Chr4	10263968	10265439	2.40948	1.69032	10256000	10258000	AT4G18630	yes	Chr4	10257077	10258943	0.888515	0.708318	4000	interaction425803	4-10264000	+	1107	4-10256000	+	1385	7445	40	0.069862	-111.974285	0	5	0.069862	500	-5.622927	501	538	-49.8927	3500	-40	4.11896143076872	3.47220631033688e-08	-3.2772941989253	7.85775511973215e-23
11066000	11068000	AT2G25940	yes	Chr2	11063300	11066028	0.829795	0.801211	11060000	11062000	AT2G25930	NA	Chr2	11059034	11063324	0.757152	0.70145	5100	interaction206988	2-11066000	+	832	2-11060000	+	2631	6007	51	0.069862	-154.895061	0	9	0.069862	900	-13.777374	359	1452	-49.8741	4200	-58	-3.24221592195652	3.60756754733312e-49	-0.47526027296208	0.000885849794893803
12050000	12052000	AT2G28260	NA	Chr2	12049988	12052453	0.616403	0.642023	12046000	12048000	AT2G28250	NA	Chr2	12043481	12046537	0.586311	0.676669	15000	interaction211873	2-12050000	+	3225	2-12046000	+	1716	3992	150	0.069862	-612.636945	0	62	0.069862	6200	-199.853748	1827	935	-49.7377	8800	-228	0.663981907710822	0.0189849494862896	-2.6556539712153	2.8491713191348e-43
7608000	7610000	AT4G13030	NA	Chr4	7607266	7609843	0.699226	0.930616	7604000	7606000	AT4G13020	NA	Chr4	7603100	7607155	0.775388	0.790281	9000	interaction411662	4-7608000	+	1265	4-7604000	+	1562	3448	90	0.069862	-322.315027	0	27	0.069862	2700	-66.005927	681	895	-49.6752	6300	-120	-2.58996899914972	5.47346359003824e-82	0.216101437535776	0.0199094978608395
9130000	9132000	AT1G26390	yes	Chr1	9130016	9131779	2.69796	2.95589	9128000	9130000	AT1G26380	yes	Chr1	9126736	9128528	1.93471	2.45284	13400	interaction47664	1-9130000	+	1818	1-9128000	+	1854	2254	134	0.069862	-531.624799	0	52	0.069862	5200	-158.860218	1075	858	-49.583	8200	-198	-5.27637783427743	1.20871348096349e-31	-2.36701820464385	0.000635177729459976
17632000	17634000	AT4G37520	yes	Chr4	17631561	17633249	1.41757	1.12201	17628000	17630000	AT4G37510	yes	Chr4	17626103	17628947	0.749899	0.639453	7200	interaction463717	4-17632000	+	1345	4-17628000	+	1304	3322	72	0.069862	-241.907467	0	18	0.069862	1800	-37.575769	589	614	-49.5651	5400	-90	-1.67732674090445	3.35842274539227e-06	3.3489242266611	1.34871578819006e-186
564000	566000	AT4G01360	yes	Chr4	564759	566310	1.89266	2.23807	560000	562000	AT4G01350	yes	Chr4	560258	562438	1.78264	1.55462	7200	interaction376893	4-564000	+	1276	4-560000	+	2112	4332	72	0.069862	-241.95095	0	18	0.069862	1800	-37.553234	651	944	-49.4522	5400	-90	2.06118422501621	0.0225810844540079	-4.05889564451202	1.96333333850415e-21
16650000	16652000	AT3G45400	NA	Chr3	16651962	16653678	0.747659	0.6254	16648000	16650000	AT3G45390	NA	Chr3	16647920	16649974	0.516124	0.56333	26000	interaction338111	3-16650000	+	1731	3-16648000	+	2905	1723	260	0.069862	-1210.826931	0	139	0.069862	13900	-562.100973	921	2105	-49.4473	12100	-454	-0.415741922906985	0.00947874359428079	-2.64175869573958	3.34253218148038e-09
22728000	22730000	AT1G61600	yes	Chr1	22729815	22731182	0.771303	0.767692	22726000	22728000	AT1G61590	yes	Chr1	22723500	22726074	3.51224	3.51935	8200	interaction112475	1-22728000	+	1394	1-22726000	+	1333	1930	82	0.069862	-285.94551	0	23	0.069862	2300	-52.972543	601	575	-49.2435	5900	-106	-0.758176079989503	0.000221726077496109	-4.78683190043272	4.35691586352882e-46
8382000	8384000	AT4G14615	yes	Chr4	8383763	8385079	0.796962	0.826012	8380000	8382000	AT4G14605	NA	Chr4	8378428	8380714	0.758401	0.723243	13600	interaction415708	4-8382000	+	1587	4-8380000	+	1290	2395	136	0.069862	-543.764721	0	54	0.069862	5400	-167.304556	752	707	-49.1983	8200	-202	-0.459873634694808	0.0473129810286214	1.75593300127724	1.50506018269199e-21
7982000	7984000	AT2G18380	yes	Chr2	7982867	7984096	3.2557	3.54196	7980000	7982000	AT2G18370	yes	Chr2	7980624	7981758	3.44054	3.40072	17600	interaction190998	2-7982000	+	2356	2-7980000	+	1466	2174	176	0.069862	-749.336109	0	80	0.069862	8000	-278.439759	1110	843	-49.0221	9600	-280	0.715018931067882	0.0101249162146009	-5.14697256077881	5.80853100690017e-38
2320000	2322000	AT5G07350	NA	Chr5	2320020	2325419	0.784527	0.701142	2318000	2320000	AT5G07340	yes	Chr5	2317212	2319649	0.750726	0.628374	16700	interaction480281	5-2320000	+	1989	5-2318000	+	1451	2038	167	0.069862	-702.003965	0	74	0.069862	7400	-252.123849	1144	763	-48.9795	9300	-262	-0.756716369134737	2.58238435606017e-05	0.260856780702297	0.0107007252236122
10986000	10988000	AT3G28970	NA	Chr3	10987786	10989921	0.882609	0.81429	10984000	10986000	AT3G28960	yes	Chr3	10984244	10985767	0.717991	0.947288	12100	interaction308880	3-10986000	+	748	3-10984000	+	2193	1718	121	0.069862	-473.713678	0	46	0.069862	4600	-136.439309	411	1393	-48.9277	7500	-176	0.355989610019465	0.0201290262511155	1.84596813029104	6.49047028956823e-05
8414000	8416000	AT1G23800	NA	Chr1	8412050	8414879	0.532997	0.659455	8410000	8412000	AT1G23790	NA	Chr1	8409962	8412041	0.613438	0.576518	16900	interaction44096	1-8414000	+	1703	1-8410000	+	2090	3787	169	0.069862	-710.958245	0	75	0.069862	7500	-255.932582	910	1076	-48.9116	9400	-266	-2.06378755030138	2.97024650814676e-12	1.21188173730922	4.52669971959441e-06
10830000	10832000	AT4G19985	yes	Chr4	10830236	10832094	0.851765	0.796362	10828000	10830000	AT4G19980	yes	Chr4	10828152	10828536	3.1929	1.5977	18200	interaction428631	4-10830000	+	2077	4-10828000	+	1642	1774	182	0.069862	-779.957721	0	84	0.069862	8400	-296.192649	1188	906	-48.7266	9800	-292	3.23768390090565	1.15541452802095e-38	-4.87941288197555	3.69385192480362e-13
25654000	25656000	AT5G64110	yes	Chr5	25654073	25656030	4.7651	5.19508	25652000	25654000	AT5G64100	yes	Chr5	25650640	25652123	4.54956	4.75674	9000	interaction598710	5-25654000	+	2298	5-25652000	+	737	2399	90	0.069862	-324.689994	0	28	0.069862	2800	-70.376133	870	241	-48.5436	6200	-120	3.33691506074173	4.46464744634949e-83	-4.99920448139462	4.65087914810901e-45
24504000	24506000	AT5G60910	yes	Chr5	24502481	24506143	4.69063	5.18534	24496000	24498000	AT5G60890	yes	Chr5	24494690	24496351	1.63603	1.01538	3200	interaction592957	5-24504000	+	2350	5-24496000	+	562	7980	32	0.069862	-83.37237	0	3	0.069862	300	-2.526202	1363	272	-48.398	2900	-30	3.66955200149144	9.02670696473915e-05	-1.5175031844268	4.01057855443485e-07
17492000	17494000	AT1G47600	yes	Chr1	17491731	17494759	3.19352	3.81454	17486000	17488000	AT1G47580	NA	Chr1	17485649	17486463	0.748891	0.761971	12300	interaction85627	1-17492000	+	1916	1-17486000	+	2465	6137	123	0.069862	-477.155055	0	46	0.069862	4600	-134.787095	1173	1633	-48.3633	7700	-178	-5.95029040241717	9.38975337248742e-17	2.89665036292867	6.83263109347817e-71
3450000	3452000	AT1G10480	yes	Chr1	3449690	3451226	4.30043	2.68336	3434000	3436000	AT1G10450	NA	Chr1	3431779	3438370	0.754382	0.672964	2857.05609	interaction18072	1-3450000	+	2115	1-3434000	+	2765	15808	30	0.073358	-75.818623	0	2	0.069862	200	-1.330894	622	1469	-48.2605	2657.06	-28	-4.70859978171962	4.53585291539041e-11	-0.322848026035472	0.00741571675122111
9920000	9922000	AT4G17840	NA	Chr4	9918051	9920475	0.815297	0.773798	9906000	9908000	AT4G17810	yes	Chr4	9906847	9907657	4.16289	6.4849	2800	interaction424062	4-9920000	+	1483	4-9906000	+	1216	13506	28	0.069862	-69.146088	0	2	0.069862	200	-1.330894	745	626	-48.2573	2600	-24	2.33873099914974	2.90554980766925e-17	8.06042871396044	5.10971582291613e-57
20150000	20152000	AT1G53990	yes	Chr1	20151015	20152752	4.02815	2.7653	20144000	20146000	AT1G53940	yes	Chr1	20143278	20145780	1.87147	1.80709	4200	interaction99528	1-20150000	+	1212	1-20144000	+	1545	6088	42	0.069862	-119.43356	0	6	0.069862	600	-7.458183	348	553	-48.2281	3600	-44	-5.66365969115388	5.40753197077067e-47	-4.98256959541925	1.54283488595112e-38
10892000	10894000	AT2G25590	NA	Chr2	10890902	10893772	0.72207	0.790469	10888000	10890000	AT2G25580	NA	Chr2	10888013	10890367	0.723371	0.726401	12600	interaction205997	2-10892000	+	2879	2-10888000	+	1882	3773	126	0.069862	-491.915802	0	48	0.069862	4800	-142.708014	1609	1042	-48.0668	7800	-184	-0.972021919734897	2.05035322518036e-12	-0.526417724915289	0.0015591665572707
18428000	18430000	AT3G49690	yes	Chr3	18427734	18429201	3.65129	3.55482	18424000	18426000	AT3G49680	NA	Chr3	18422648	18425693	0.797688	0.770976	8100	interaction348140	3-18428000	+	1883	3-18424000	+	1218	4175	81	0.069862	-281.710716	0	23	0.069862	2300	-52.928224	898	644	-48.0511	5800	-104	-4.2888159800079	7.85892834740839e-21	1.57399176385477	1.02379103481991e-19
1694000	1696000	AT1G05660	yes	Chr1	1694285	1696058	4.03856	4.65416	1690000	1692000	AT1G05650	yes	Chr1	1690263	1692126	3.11406	3.16929	7300	interaction8440	1-1694000	+	1678	1-1690000	+	1270	3975	73	0.069862	-246.308745	0	19	0.069862	1900	-40.541033	777	615	-48.0476	5400	-92	-5.88798833280304	1.44145602895808e-26	-5.49726046873814	1.01035574274976e-09
8664000	8666000	AT2G20080	yes	Chr2	8662929	8665026	3.73423	2.90399	8660000	8662000	AT2G20060	yes	Chr2	8659042	8661489	0.872848	0.728804	16333.03862	interaction194643	2-8664000	+	2565	2-8660000	+	2353	3786	177	0.075709	-750.3974	0	73	0.069862	7300	-246.692553	1074	1212	-47.9773	9033.04	-280	-6.56655089462458	5.50771107348426e-22	-0.458228403428666	0.00776904011927413
22848000	22850000	AT1G61840	yes	Chr1	22847388	22849833	2.60548	3.11697	22838000	22840000	AT1G61820	yes	Chr1	22835077	22838615	2.42394	1.35935	3200	interaction113096	1-22848000	+	1868	1-22838000	+	922	9824	32	0.069862	-83.038278	0	3	0.069862	300	-2.524978	820	382	-47.9632	2900	-30	-4.67492372188926	3.89968387289612e-58	-3.01394948328043	1.96511552452776e-28
14744000	14746000	AT4G30150	NA	Chr4	14742451	14749987	0.683018	0.623722	14738000	14740000	AT4G30140	yes	Chr4	14738386	14740676	4.04927	4.08302	6700	interaction449235	4-14744000	+	2197	4-14738000	+	1662	6110	67	0.069862	-220.031123	0	16	0.069862	1600	-31.749241	1100	771	-47.9391	5100	-82	-0.649330942463203	0.000147113351688819	1.14037857623827	0.0321302825447793
16006000	16008000	AT3G44330	NA	Chr3	16006674	16010965	0.830944	0.757004	16002000	16004000	AT3G44326	yes	Chr3	16000878	16002118	3.77111	1.54936	3200	interaction334897	3-16006000	+	764	3-16002000	+	1326	3730	32	0.069862	-83.145553	0	3	0.069862	300	-2.524779	409	534	-47.8933	2900	-30	-0.691476768315139	4.07613801952777e-12	-5.96547641490072	6.32503063543179e-17
16490000	16492000	AT3G45090	yes	Chr3	16490599	16494762	0.822011	0.73674	16486000	16488000	AT3G45070	yes	Chr3	16486282	16487349	2.99198	3.20191	10700	interaction337346	3-16490000	+	2197	3-16486000	+	1666	4542	107	0.069862	-400.655072	0	37	0.069862	3700	-100.974606	1263	953	-47.8894	7000	-150	-0.989709010992422	2.70034720355579e-09	-5.11727606305979	3.30512414547134e-18
8062000	8064000	AT3G22800	yes	Chr3	8062887	8064556	2.23464	1.96282	8058000	8060000	AT3G22790	yes	Chr3	8052317	8058764	0.619109	0.6469	4200	interaction295001	3-8062000	+	2220	3-8058000	+	840	4140	42	0.069862	-119.742402	0	6	0.069862	600	-7.452343	853	432	-47.8611	3600	-44	-5.53082108171897	3.19026218678598e-29	-0.696747365023308	2.43688945020547e-05
19420000	19422000	AT1G52160	NA	Chr1	19420714	19424439	0.742493	0.752784	19418000	19420000	AT1G52155	NA	Chr1	19417665	19419853	0.776938	0.791881	16200	interaction96218	1-19420000	+	1885	1-19418000	+	1844	2143	162	0.069862	-673.848771	0	71	0.069862	7100	-238.308869	946	1078	-47.8475	9100	-252	-0.674356103139212	0.000108220828337128	-1.04026150158954	2.38749088245361e-14
20234000	20236000	AT5G49800	yes	Chr5	20234641	20236184	2.31552	2.17683	20232000	20234000	AT5G49780	yes	Chr5	20229255	20233095	1.73014	2.20718	15600	interaction571380	5-20234000	+	1988	5-20232000	+	2691	2341	156	0.069862	-642.38437	0	67	0.069862	6700	-220.916036	1001	1371	-47.7688	8900	-240	0.505224059118484	0.0041677806283693	-3.87017635664351	1.65165135046626e-31
11988000	11990000	AT4G22820	NA	Chr4	11987704	11989006	0.864313	0.846417	11984000	11986000	AT4G22810	yes	Chr4	11984139	11985702	4.54574	3.8403	9200	interaction434124	4-11988000	+	1161	4-11984000	+	3507	3643	92	0.069862	-331.800635	0	29	0.069862	2900	-72.841808	622	1409	-47.6853	6300	-124	-1.34806493377279	6.08653579837854e-08	-5.41664451019161	1.12726789762446e-28
10028000	10030000	AT4G18060	NA	Chr4	10027479	10029899	0.741177	0.68637	10024000	10026000	AT4G18050	yes	Chr4	10022204	10027415	0.970984	1.07483	12300	interaction424533	4-10028000	+	1193	4-10024000	+	2505	3843	123	0.069862	-479.630626	0	47	0.069862	4700	-139.373101	667	1325	-47.6722	7600	-178	0.480254580729519	0.00830380639653392	0.727519371258791	0.00757612425537924
20152000	20154000	AT1G53990	yes	Chr1	20151015	20152752	4.02815	2.7653	20144000	20146000	AT1G53940	yes	Chr1	20143278	20145780	1.87147	1.80709	3900	interaction99537	1-20152000	+	1660	1-20144000	+	1545	8069	39	0.069862	-108.065808	0	5	0.069862	500	-5.621864	547	553	-47.6714	3400	-40	-5.66365969115388	5.40753197077067e-47	-4.98256959541925	1.54283488595112e-38
15948000	15950000	AT2G38100	NA	Chr2	15948483	15950228	0.70654	0.724661	15944000	15946000	AT2G38090	NA	Chr2	15944710	15947085	0.878507	0.769302	16200	interaction232865	2-15948000	+	2578	2-15944000	+	2036	3702	162	0.069862	-673.150469	0	71	0.069862	7100	-237.935569	1467	1099	-47.6126	9100	-252	-5.91567919021633	7.64445803927461e-10	-1.46731278373976	1.85409562170177e-08
20466000	20468000	AT5G50300	yes	Chr5	20466067	20468124	4.06442	3.36419	20462000	20464000	AT5G50290	yes	Chr5	20461776	20464177	1.47816	1.3299	15364.721493	interaction572812	5-20466000	+	4306	5-20462000	+	1692	3839	201	0.091393	-881.790998	0	67	0.069862	6700	-221.072288	1904	936	-47.5933	8664.72	-330	-4.49560254984728	4.03112565550415e-11	-1.16402515272581	0.000909709811153313
1886000	1888000	AT5G06230	yes	Chr5	1884927	1887121	1.1945	1.22701	1882000	1884000	AT5G06220	NA	Chr5	1879936	1885643	0.791889	0.736324	16500	interaction478032	5-1886000	+	2108	5-1882000	+	2032	3538	165	0.069862	-688.712681	0	73	0.069862	7300	-246.680986	1079	1224	-47.589	9200	-258	-3.08762028449837	1.14701589934933e-19	1.67144228043885	1.48225951685183e-28
24750000	24752000	AT5G61550	NA	Chr5	24748101	24751871	0.575546	0.594316	24746000	24748000	AT5G61540	NA	Chr5	24744946	24747524	0.691571	0.633723	6800	interaction594155	5-24750000	+	2096	5-24746000	+	777	3494	68	0.069862	-225.876764	0	17	0.069862	1700	-34.717639	1142	453	-47.5661	5100	-84	-5.00928233648696	7.8203289183316e-51	0.704276173422655	1.52365146849733e-05
23770000	23772000	AT1G64060	yes	Chr1	23769773	23776931	1.5275	0.964963	23764000	23766000	AT1G64050	NA	Chr1	23762352	23766168	0.776504	0.793667	6200	interaction117859	1-23770000	+	1562	1-23764000	+	2370	5647	62	0.069862	-199.038266	0	14	0.069862	1400	-26.275464	518	1249	-47.5474	4800	-74	-2.72481543458543	2.94617730923313e-33	0.373554824959886	0.0288879499324161
3716000	3718000	AT5G11570	yes	Chr5	3715942	3718276	3.17825	2.67313	3712000	3714000	AT5G11560	yes	Chr5	3709480	3714059	0.850446	0.833255	13255.392569	interaction487761	5-3716000	+	3113	5-3712000	+	2119	3675	157	0.082747	-647.125344	0	53	0.069862	5300	-162.573717	1376	1070	-47.4422	7955.39	-242	-3.97153394043936	2.39788193043395e-26	-0.789255207303461	6.61600917784535e-15
20026000	20028000	AT1G53645	yes	Chr1	20026146	20028635	0.787388	0.78045	20024000	20026000	AT1G53640	yes	Chr1	20020884	20025461	2.98821	2.26763	15600	interaction99035	1-20026000	+	1913	1-20024000	+	1409	1858	156	0.069862	-645.020725	0	68	0.069862	6800	-226.135424	1102	716	-47.3033	8800	-240	-0.685758873421524	0.00173741970872208	-5.65485838248128	6.14039994721738e-15
12984000	12986000	AT4G25410	yes	Chr4	12985754	12987217	4.53417	4.11508	12980000	12982000	AT4G25400	yes	Chr4	12981294	12982468	5.11722	2.87462	5700	interaction439692	4-12984000	+	1159	4-12980000	+	1443	3802	57	0.069862	-178.730527	0	12	0.069862	1200	-21.068966	348	421	-47.1954	4500	-66	-2.66380163178544	5.58492089495126e-10	-5.74654356726695	2.8521010043939e-26
16632000	16634000	AT5G41590	yes	Chr5	16632085	16633896	2.29125	1.58217	16624000	16626000	AT5G41570	yes	Chr5	16624213	16625977	3.62918	3.44955	5500	interaction552903	5-16632000	+	1427	5-16624000	+	1877	7811	55	0.069862	-170.326067	0	11	0.069862	1100	-18.486874	644	847	-47.0794	4400	-62	-1.36152061381096	0.00567391274684135	-5.12425826141463	9.02356020839903e-08
11480000	11482000	AT4G21590	NA	Chr4	11480343	11482719	0.676729	0.734861	11478000	11480000	AT4G21585	NA	Chr4	11477987	11479953	0.666	0.625426	24800	interaction431662	4-11480000	+	1980	4-11478000	+	2416	2122	248	0.069862	-1140.034562	0	132	0.069862	13200	-524.388191	1180	1389	-47.0104	11600	-426	-1.8219653811086	0.000221726077496109	0.611212337152594	0.0108816642569627
13852000	13854000	AT4G27800	yes	Chr4	13851861	13854191	0.831984	0.795156	13848000	13850000	AT4G27780	NA	Chr4	13847548	13849887	0.615515	0.633912	18900	interaction444531	4-13852000	+	1807	4-13848000	+	2769	4076	189	0.069862	-816.314036	0	90	0.069862	9000	-323.061753	1030	1593	-46.9915	9900	-306	2.81399714029635	2.60779317580831e-62	-1.08332885856013	1.17129826147338e-05
5874000	5876000	AT1G17190	yes	Chr1	5875349	5876545	2.60614	1.80094	5872000	5874000	AT1G17180	NA	Chr1	5872144	5873086	0.722502	0.795869	4700	interaction30894	1-5874000	+	1066	1-5872000	+	1082	2063	47	0.069862	-138.768102	0	8	0.069862	800	-11.538013	433	526	-46.8263	3900	-52	-2.69593128084101	9.44416541561906e-09	-4.63869340397231	8.04792420589532e-12
19508000	19510000	AT2G47550	yes	Chr2	19508979	19511792	3.21373	2.9556	19506000	19508000	AT2G47540	yes	Chr2	19505859	19506598	4.43495	4.71299	8200	interaction250979	2-19508000	+	2157	2-19506000	+	1230	2588	82	0.069862	-286.158381	0	24	0.069862	2400	-56.199452	981	565	-46.8145	5800	-106	-3.87503918359739	7.42968628456927e-16	-5.83808301767958	1.63335872439722e-43
1240000	1242000	AT3G04590	NA	Chr3	1238852	1241640	0.750692	0.712213	1230000	1232000	AT3G04570	yes	Chr3	1230985	1232328	5.08888	0.76369	5000	interaction258365	3-1240000	+	1687	3-1230000	+	2838	9229	50	0.069862	-150.162551	0	9	0.069862	900	-13.734237	981	777	-46.7432	4100	-56	0.753806666133272	1.16941469809154e-07	-5.44179433445392	1.98755563568019e-40
16080000	16082000	AT5G40230	NA	Chr5	16079647	16081735	0.546392	0.610874	16076000	16078000	AT5G40210	NA	Chr5	16073619	16076117	1.05855	0.92036	9300	interaction550188	5-16080000	+	1139	5-16076000	+	1550	4498	93	0.069862	-336.488757	0	30	0.069862	3000	-76.279554	632	961	-46.7296	6300	-126	-3.39547788788826	2.92910694403254e-38	-2.72593028548598	1.19607645930826e-05
21102000	21104000	AT5G51930	yes	Chr5	21101122	21103568	2.23433	1.50339	21098000	21100000	AT5G51920	yes	Chr5	21097105	21098959	1.12065	0.897465	12300	interaction575742	5-21102000	+	1966	5-21098000	+	1849	3987	123	0.069862	-477.301129	0	47	0.069862	4700	-138.949454	985	903	-46.7271	7600	-178	-5.30195612504147	5.98013282685632e-14	-1.76580034690571	3.91180254511679e-11
12342000	12344000	AT4G23700	yes	Chr4	12342427	12346043	1.52697	1.82672	12338000	12340000	AT4G23690	yes	Chr4	12338870	12339747	2.74793	2.08757	13400	interaction436268	4-12342000	+	3026	4-12338000	+	1588	4054	134	0.069862	-532.363782	0	54	0.069862	5400	-167.207611	1413	742	-46.6962	8000	-198	-4.31436814061529	2.38626455297008e-47	-4.07992297416125	9.77714562293968e-44
24784000	24786000	AT1G66440	yes	Chr1	24782170	24784351	1.91077	2.35922	24780000	24782000	AT1G66430	yes	Chr1	24778270	24780629	0.80816	0.792057	9100	interaction123341	1-24784000	+	1208	1-24780000	+	1868	3200	91	0.069862	-327.056318	0	29	0.069862	2900	-72.930896	545	964	-46.4024	6200	-122	-6.15921463922013	2.69479729087011e-22	2.63307126249562	3.57641531019027e-152
30338000	30340000	AT1G80730	yes	Chr1	30339322	30340247	2.23541	2.07166	30336000	30338000	AT1G80720	NA	Chr1	30336137	30337565	0.603483	0.660549	14900	interaction151194	1-30338000	+	1538	1-30336000	+	2208	2514	149	0.069862	-608.318456	0	64	0.069862	6400	-208.829177	752	1192	-46.2176	8500	-228	-2.46092384818898	4.42074916190222e-05	-0.345833750074906	0.0331247359450844
30370000	30372000	AT1G80820	yes	Chr1	30370571	30372670	1.79594	1.729	30368000	30370000	AT1G80810	NA	Chr1	30365286	30368898	0.63244	0.618938	8900	interaction151379	1-30370000	+	1928	1-30368000	+	1211	2477	89	0.069862	-317.884839	0	28	0.069862	2800	-69.434557	936	616	-46.1939	6100	-118	-3.46807589803782	7.84468261667058e-27	0.472134584684665	0.0385460613198727
28246000	28248000	AT1G75260	NA	Chr1	28247808	28249441	0.601627	0.752031	28244000	28246000	AT1G75250	yes	Chr1	28244316	28245501	2.66309	2.68859	7500	interaction141151	1-28246000	+	1435	1-28244000	+	748	2141	75	0.069862	-256.6184	0	21	0.069862	2100	-46.752778	837	462	-46.128	5400	-96	-0.933030432610363	0.01057399746198	2.95926742060125	8.55148810425194e-06
18394000	18396000	AT5G45380	yes	Chr5	18391123	18395894	1.82686	1.96174	18388000	18390000	AT5G45370	NA	Chr5	18388290	18390420	0.672235	0.713134	10000	interaction561934	5-18394000	+	1773	5-18388000	+	1547	5631	100	0.069862	-367.936364	0	34	0.069862	3400	-90.238099	874	782	-46.0525	6600	-136	-2.63682998530295	7.01140964019606e-82	-0.588268388643929	2.19988278504737e-05
25434000	25436000	AT1G67840	NA	Chr1	25434101	25437075	0.838588	0.707124	25426000	25428000	AT1G67810	yes	Chr1	25426487	25427349	3.10571	1.62023	5200	interaction126887	1-25434000	+	2638	1-25426000	+	1694	7937	52	0.069862	-158.102781	0	10	0.069862	1000	-16.064131	1579	675	-46.0312	4200	-58	2.89996582598161	4.10726043862537e-46	-2.88276254645573	8.40356807109229e-10
10730000	10732000	AT4G19720	yes	Chr4	10730362	10731750	3.42336	2.50374	10728000	10730000	AT4G19710	yes	Chr4	10724854	10729768	0.905931	0.789882	19500	interaction427899	4-10730000	+	1855	4-10728000	+	2994	1981	195	0.069862	-848.254417	0	95	0.069862	9500	-347.414792	812	1708	-45.9785	10000	-318	-5.7627611558776	8.5463899699399e-27	1.04694139692685	6.06793012313739e-08
21088000	21090000	AT3G56990	NA	Chr3	21088256	21092061	0.706489	0.717782	21084000	21086000	AT3G56970	NA	Chr3	21084109	21085150	0.653191	0.997895	8900	interaction361867	3-21088000	+	1748	3-21084000	+	1536	4088	89	0.069862	-317.184571	0	28	0.069862	2800	-69.374517	852	686	-45.8482	6100	-118	-0.60557028950554	0.0248546462877569	1.21409515629241	1.20533926861493e-08
12482000	12484000	AT2G29060	yes	Chr2	12481743	12484087	1.08541	0.821548	12478000	12480000	AT2G29050	NA	Chr2	12478145	12480372	0.775981	0.774776	12700	interaction214136	2-12482000	+	2551	2-12478000	+	1933	3701	127	0.069862	-496.713189	0	50	0.069862	5000	-150.638337	1404	1014	-45.7548	7700	-186	-4.19752319287526	1.67043444180946e-50	-0.305131875708217	0.00528615820516327
29678000	29680000	AT1G78930	NA	Chr1	29678096	29680757	0.728678	0.625343	29674000	29676000	AT1G78920	NA	Chr1	29671492	29677537	0.759115	0.706516	8100	interaction147690	1-29678000	+	1149	1-29674000	+	1214	3954	81	0.069862	-281.874179	0	24	0.069862	2400	-56.197009	568	719	-45.6342	5700	-104	0.88650459070533	0.000181125467100535	-0.387508131212431	5.53637540166113e-05
5142000	5144000	AT1G14910	NA	Chr1	5139711	5143689	0.794102	0.746911	5132000	5134000	AT1G14880	yes	Chr1	5132534	5133716	3.05456	3.39932	2700	interaction26734	1-5142000	+	1773	1-5132000	+	1289	10134	27	0.069862	-65.775588	0	2	0.069862	200	-1.330894	985	618	-45.6185	2500	-24	0.274393236231653	0.00795946430829199	5.94856434381003	3.31213888045262e-06
6424000	6426000	AT4G10370	yes	Chr4	6423576	6425661	3.26545	3.72237	6416000	6418000	AT4G10350	yes	Chr4	6415255	6416829	3.89635	4.75186	7000	interaction405636	4-6424000	+	2676	4-6416000	+	2069	7952	70	0.069862	-232.572263	0	18	0.069862	1800	-37.461268	1343	1146	-45.6144	5200	-86	-5.67800047562609	4.24588314896379e-33	-5.56122219797738	1.71899484355653e-18
23994000	23996000	AT5G59530	NA	Chr5	23994169	23995734	0.755367	0.735283	23992000	23994000	AT5G59520	yes	Chr5	23991252	23992798	4.13401	3.90051	9000	interaction590304	5-23994000	+	1351	5-23992000	+	976	2393	90	0.069862	-323.28586	0	29	0.069862	2900	-73.091716	511	446	-45.6007	6100	-120	-5.43814781106637	1.02656703695857e-32	-5.47281209884653	9.75752778161051e-17
5780000	5782000	AT3G16940	NA	Chr3	5781774	5786280	0.81203	0.741419	5776000	5778000	AT3G16920	yes	Chr3	5776485	5777889	3.17709	3.51703	10300	interaction282215	3-5780000	+	1463	3-5776000	+	1983	3574	103	0.069862	-382.212616	0	36	0.069862	3600	-97.478498	770	858	-45.5882	6700	-142	-0.347356968031351	0.0141641592710621	-1.78588976939552	1.7724182774761e-05
8686000	8688000	AT5G25160	yes	Chr5	8687456	8688415	3.61809	1.73044	8676000	8678000	AT5G25150	NA	Chr5	8677090	8682205	0.81558	0.711288	4100	interaction514122	5-8686000	+	1457	5-8676000	+	1096	9237	41	0.069862	-115.731614	0	6	0.069862	600	-7.447339	723	545	-45.561	3500	-42	-4.78179493506217	1.47477638474199e-42	0.369876978550982	0.0383590908169567
21934000	21936000	AT5G54050	yes	Chr5	21933622	21935995	1.52433	1.73521	21930000	21932000	AT5G54040	yes	Chr5	21928846	21930637	2.61756	2.99639	13800	interaction579950	5-21934000	+	2558	5-21930000	+	1998	3602	138	0.069862	-551.112279	0	57	0.069862	5700	-178.989296	1307	976	-45.525	8100	-206	-5.60893544566925	8.33763914908416e-11	-4.83936233201045	7.57037721911891e-16
7820000	7822000	AT5G23220	yes	Chr5	7819815	7820676	4.89865	5.06957	7812000	7814000	AT5G23210	yes	Chr5	7810682	7815039	2.17667	2.90491	3100	interaction509605	5-7820000	+	1554	5-7812000	+	798	7062	31	0.069862	-79.61375	0	3	0.069862	300	-2.524793	500	407	-45.4903	2800	-28	-5.53185944964956	5.11459174631043e-19	0.902355954119987	0.00535086562202609
21420000	21422000	AT3G57830	NA	Chr3	21419516	21422546	0.666999	0.635511	21400000	21402000	AT3G57780	NA	Chr3	21399765	21402899	0.611638	0.587228	2700	interaction363642	3-21420000	+	2603	3-21400000	+	1477	19655	27	0.069862	-65.743	0	2	0.069862	200	-1.330893	1789	1031	-45.4343	2500	-24	1.44369852470067	1.53934966924452e-12	1.573011115028	9.42252811078709e-12
18434000	18436000	AT5G45500	NA	Chr5	18432457	18435469	0.63713	0.606499	18430000	18432000	AT5G45490	NA	Chr5	18429046	18432397	0.642806	0.727573	13200	interaction562077	5-18434000	+	1798	5-18430000	+	1277	2974	132	0.069862	-523.796756	0	54	0.069862	5400	-167.376941	925	683	-45.2945	7800	-196	-0.801025672331938	0.000129033935609783	0.719107247305454	0.0221499035459041
15856000	15858000	AT4G32860	yes	Chr4	15856610	15857359	3.43679	1.92684	15852000	15854000	AT4G32850	NA	Chr4	15849771	15854868	0.854632	0.762826	7700	interaction454906	4-15856000	+	1513	4-15852000	+	1393	3687	77	0.069862	-263.637857	0	22	0.069862	2200	-49.768935	623	767	-45.2032	5500	-98	-5.01344978778132	1.29458622110533e-20	-0.589527101893091	1.85427234494904e-05
9360000	9362000	AT1G26970	yes	Chr1	9359681	9361833	1.4538	1.26541	9350000	9352000	AT1G26945	yes	Chr1	9351453	9352761	2.87988	4.14969	3100	interaction48949	1-9360000	+	1197	1-9350000	+	1502	9622	31	0.069862	-79.427637	0	3	0.069862	300	-2.523811	623	960	-45.175	2800	-28	-5.42308036964572	3.59385611602117e-19	2.16822786546275	3.89198019037348e-25
19454000	19456000	AT3G52490	yes	Chr3	19455698	19458919	3.10217	2.39961	19452000	19454000	AT3G52480	yes	Chr3	19452253	19453162	2.91533	1.61664	7900	interaction353383	3-19454000	+	1522	3-19452000	+	1807	2212	79	0.069862	-272.287615	0	23	0.069862	2300	-52.884849	730	814	-45.1745	5600	-102	-2.20720391305722	9.88396023194296e-17	-1.27193918328655	3.09480157768791e-06
9820000	9822000	AT3G26720	NA	Chr3	9816580	9823186	0.811297	0.755546	9814000	9816000	AT3G26710	NA	Chr3	9813370	9814750	0.708969	0.710977	5400	interaction303451	3-9820000	+	1349	3-9814000	+	1837	5700	54	0.069862	-166.337917	0	11	0.069862	1100	-18.474061	785	1060	-45.1556	4300	-62	-1.00693835833735	1.04326948185909e-11	4.09301176651597	8.43828003913231e-207
2634000	2636000	AT1G08350	NA	Chr1	2632809	2635852	0.690355	0.694127	2630000	2632000	AT1G08340	yes	Chr1	2631067	2632871	0.914048	0.944728	15900	interaction13741	1-2634000	+	1927	1-2630000	+	2366	3845	159	0.069862	-658.02653	0	71	0.069862	7100	-238.372996	924	1160	-45.1245	8800	-246	-0.887672772166599	1.87305233505249e-10	-2.70487530280416	3.76571092002045e-55
18914000	18916000	AT2G45970	yes	Chr2	18912259	18914739	2.17749	2.85525	18906000	18908000	AT2G45950	NA	Chr2	18904323	18907814	0.78791	0.663119	3100	interaction248203	2-18914000	+	1675	2-18906000	+	1675	8051	31	0.069862	-79.322182	0	3	0.069862	300	-2.523484	757	863	-45.0713	2800	-28	0.924603903325361	0.00277579381234003	1.1029893965276	1.74580638712683e-14
6164000	6166000	AT5G18560	yes	Chr5	6164586	6165991	4.40247	5.25445	6162000	6164000	AT5G18550	NA	Chr5	6160177	6163130	0.75528	0.715904	14600	interaction500807	5-6164000	+	2508	5-6162000	+	971	2059	146	0.069862	-597.352655	0	64	0.069862	6400	-209.798889	1303	558	-45.0082	8200	-224	-4.95090466784806	1.45700379358607e-14	0.900239863021064	1.84710035943736e-12
18202000	18204000	AT3G49110	yes	Chr3	18200663	18203142	3.06863	2.86775	18198000	18200000	AT3G49100	yes	Chr3	18196838	18198457	0.964496	0.919462	11100	interaction346918	3-18202000	+	2402	3-18198000	+	1524	3960	111	0.069862	-420.057853	0	41	0.069862	4100	-115.939555	1142	854	-44.9626	7000	-156	7.66743881134028	3.60779527057994e-121	-0.509581085422999	0.00020004369067188
21700000	21702000	AT1G58410	yes	Chr1	21701184	21704255	2.46631	0.919256	21696000	21698000	AT1G58400	yes	Chr1	21696164	21699118	1.68067	0.699324	11471.792608	interaction107518	1-21700000	+	2135	1-21696000	+	2615	4056	115	0.070034	-438.024153	0	43	0.069862	4300	-123.362984	1025	1494	-44.95	7171.79	-164	-2.73487438973555	1.21555502561119e-19	-2.80330429409212	4.34060113728482e-08
7082000	7084000	AT5G20885	NA	Chr5	7083964	7084734	0.683485	0.850444	7070000	7072000	AT5G20850	NA	Chr5	7070585	7072951	0.636753	0.651815	3100	interaction505783	5-7082000	+	1985	5-7070000	+	1887	11273	31	0.069862	-79.292613	0	3	0.069862	300	-2.523074	1037	1100	-44.9422	2800	-28	-1.11360355011831	3.7366451008067e-07	0.53907743634858	0.0061930149906748
10768000	10770000	AT4G19820	yes	Chr4	10767435	10768614	2.51008	3.60657	10764000	10766000	AT4G19810	yes	Chr4	10763933	10765753	2.46204	3.17256	9900	interaction428165	4-10768000	+	2295	4-10764000	+	1593	3668	99	0.069862	-363.172903	0	34	0.069862	3400	-90.173515	1650	862	-44.8847	6500	-136	7.39876400462143	1.76664378476993e-16	-1.68321451568303	6.35772527272314e-19
14570000	14572000	AT4G29750	yes	Chr4	14569727	14573177	0.832072	0.763565	14566000	14568000	AT4G29740	yes	Chr4	14566264	14569332	2.15065	2.49195	4600	interaction448325	4-14570000	+	1498	4-14566000	+	1092	4401	46	0.069862	-134.851536	0	8	0.069862	800	-11.532742	890	484	-44.8031	3800	-50	1.82844193836809	1.69953233665432e-53	-1.49226004446129	0.00545651106404902
1528000	1530000	AT5G05160	yes	Chr5	1527974	1530062	0.736879	0.762244	1520000	1522000	AT5G05140	NA	Chr5	1519912	1522667	0.737312	0.879607	6453.473578	interaction476077	5-1528000	+	3678	5-1520000	+	1619	7513	69	0.074696	-228.604371	0	16	0.069862	1600	-31.73151	2023	884	-44.7741	4853.47	-84	-1.88850627611006	2.47469178935531e-20	-0.700329332301226	7.00992236214083e-10
21088000	21090000	AT3G56990	NA	Chr3	21088256	21092061	0.706489	0.717782	21086000	21088000	AT3G56980	yes	Chr3	21086545	21087494	0.859379	1.00335	7800	interaction361868	3-21088000	+	1748	3-21086000	+	879	2142	78	0.069862	-269.343281	0	23	0.069862	2300	-53.233575	852	354	-44.6749	5500	-100	-0.60557028950554	0.0248546462877569	-0.542568388810897	9.23483658228297e-08
3424000	3426000	AT1G10417	NA	Chr1	3424185	3427457	0.785578	0.76096	3418000	3420000	AT1G10410	NA	Chr1	3416679	3419639	0.715677	0.792563	10600	interaction17916	1-3424000	+	2207	1-3418000	+	1992	6260	106	0.069862	-395.358465	0	38	0.069862	3800	-104.652189	1250	952	-44.6623	6800	-148	-1.0632756867232	3.34271649867114e-06	-1.03173935236264	1.82693874771212e-22
18668000	18670000	AT1G50400	NA	Chr1	18668154	18670546	0.73873	0.643007	18662000	18664000	AT1G50380	NA	Chr1	18662308	18666478	0.7796	0.674781	9000	interaction92112	1-18668000	+	1637	1-18662000	+	2715	5387	90	0.069862	-321.579901	0	29	0.069862	2900	-72.645193	907	1508	-44.6556	6100	-120	-1.54467426607637	0.000591671285957091	-0.335948276471269	0.000981459657236001
4086000	4088000	AT5G12940	yes	Chr5	4087711	4089004	1.16842	1.23209	4084000	4086000	AT5G12930	NA	Chr5	4082889	4085297	0.578093	0.655565	11400	interaction489735	5-4086000	+	1499	5-4084000	+	2124	2630	114	0.069862	-434.540193	0	43	0.069862	4300	-123.485656	898	1175	-44.6467	7100	-162	-1.55069133287095	1.40545892485667e-09	-0.891937320264373	5.67097907055039e-08
25658000	25660000	AT5G64120	yes	Chr5	25659305	25661002	4.88189	5.34733	25654000	25656000	AT5G64110	yes	Chr5	25654073	25656030	4.7651	5.19508	11900	interaction598727	5-25658000	+	1578	5-25654000	+	2298	4205	119	0.069862	-458.507095	0	46	0.069862	4600	-135.436352	674	870	-44.623	7300	-170	-2.56657160448643	1.53594421712067e-11	3.33691506074173	4.46464744634949e-83
3564000	3566000	AT5G11190	yes	Chr5	3564975	3566051	3.96047	4.32923	3560000	3562000	AT5G11180	yes	Chr5	3557260	3561575	1.62617	1.51284	12400	interaction486911	5-3564000	+	2517	5-3560000	+	1746	4072	124	0.069862	-482.440931	0	49	0.069862	4900	-146.83079	1171	895	-44.5709	7500	-180	6.19348742163869	1.13564301034683e-13	-5.15135955329745	2.09777052581074e-07
2084000	2086000	AT5G06740	yes	Chr5	2084093	2086052	0.989645	0.78647	2080000	2082000	AT5G06730	yes	Chr5	2079954	2081684	1.98197	1.31104	13841.518504	interaction479015	5-2084000	+	4382	5-2080000	+	2167	4175	236	0.119116	-1071.290052	0	59	0.069862	5900	-187.232886	2045	984	-44.5542	7941.52	-400	-5.21082172116169	1.40661301384844e-28	-4.37189846115992	7.31794119790781e-30
7050000	7052000	AT5G20830	yes	Chr5	7050225	7055195	0.768658	0.772917	7046000	7048000	AT5G20820	yes	Chr5	7046750	7047396	4.7498	4.54026	10200	interaction505626	5-7050000	+	2964	5-7046000	+	1454	3894	102	0.069862	-377.528642	0	36	0.069862	3600	-97.617815	1542	656	-44.4962	6600	-140	-3.27514329771015	1.46446224721182e-17	-3.6676489031991	7.65988183352803e-07
19420000	19422000	AT1G52160	NA	Chr1	19420714	19424439	0.742493	0.752784	19416000	19418000	AT1G52155	NA	Chr1	19417665	19419853	0.776938	0.791881	6400	interaction96217	1-19420000	+	1885	1-19416000	+	969	4216	64	0.069862	-208.215641	0	16	0.069862	1600	-31.837141	946	473	-44.4927	4800	-78	-0.674356103139212	0.000108220828337128	-1.04026150158954	2.38749088245361e-14
19690000	19692000	AT2G48160	NA	Chr2	19689408	19696821	0.675772	0.582991	19684000	19686000	AT2G48130	yes	Chr2	19685065	19685993	1.72846	2.0558	13196.048009	interaction251977	2-19690000	+	2441	2-19684000	+	2386	5725	138	0.07306	-550.319971	0	54	0.069862	5400	-166.42305	1416	1248	-44.4544	7796.05	-206	0.411714402899852	0.0142708370162266	-5.25261113035474	4.10763016588617e-57
1740000	1742000	AT5G05790	yes	Chr5	1740571	1742028	2.37945	1.49239	1736000	1738000	AT5G05780	yes	Chr5	1735724	1738700	1.03167	0.960895	14600	interaction477274	5-1740000	+	2278	5-1736000	+	1868	4157	146	0.069862	-591.753297	0	63	0.069862	6300	-203.841991	1176	1045	-44.4409	8300	-220	-2.52654762866874	1.5686851727405e-22	-0.293130026426024	3.78282440768148e-06
19704000	19706000	AT3G53170	NA	Chr3	19704484	19706417	0.799818	0.624406	19702000	19704000	AT3G53160	NA	Chr3	19702455	19703976	0.687103	0.827301	28600	interaction354567	3-19704000	+	2405	3-19702000	+	1882	1816	286	0.069862	-1359.047844	0	164	0.069862	16400	-688.720498	1450	1168	-44.3786	12200	-508	2.11700245869878	1.30700366391922e-19	-0.878008121928998	0.0154680471956026
5838000	5840000	AT5G17710	yes	Chr5	5839342	5841728	0.884426	0.820793	5832000	5834000	AT5G17700	yes	Chr5	5830580	5833901	2.51642	2.89521	10639.293638	interaction498892	5-5838000	+	1955	5-5832000	+	3106	6009	116	0.076171	-443.126755	0	39	0.069862	3900	-108.372417	932	1719	-44.3483	6739.29	-166	1.67092783341888	1.50270247152514e-34	2.11506852771364	1.43936687797693e-19
7298000	7300000	AT4G12270	yes	Chr4	7297807	7299930	2.32509	2.08926	7290000	7292000	AT4G12250	NA	Chr4	7289191	7290902	0.704752	0.735884	4600	interaction410259	4-7298000	+	1509	4-7290000	+	1804	7726	46	0.069862	-134.594449	0	8	0.069862	800	-11.518795	704	866	-44.3384	3800	-50	-4.74403910555384	6.11321519098426e-14	-0.650448468850592	0.0263176948445464
5540000	5542000	AT3G16340	yes	Chr3	5539787	5546449	0.826049	0.778622	5532000	5534000	AT3G16320	NA	Chr3	5529533	5534663	0.696595	0.69876	5300	interaction280961	3-5540000	+	1311	3-5532000	+	2561	7924	53	0.069862	-162.338555	0	11	0.069862	1100	-18.508414	495	1624	-44.193	4200	-60	-2.4798721947689	1.37364253743833e-57	-0.859407645490362	0.000125186822442885
11076000	11078000	AT2G25980	yes	Chr2	11077487	11079918	1.56442	1.81405	11074000	11076000	AT2G25970	NA	Chr2	11071650	11075669	0.849819	0.791769	7600	interaction207036	2-11076000	+	1189	2-11074000	+	1740	1994	76	0.069862	-259.594752	0	22	0.069862	2200	-49.80186	569	803	-44.0969	5400	-96	-5.36389503778318	3.03703968290071e-17	0.24378676083674	0.0162657701370461
10492000	10494000	AT4G19190	NA	Chr4	10493246	10496160	0.750304	0.741329	10490000	10492000	AT4G19185	NA	Chr4	10489041	10491671	0.67978	0.672867	17300	interaction426988	4-10492000	+	1476	4-10490000	+	2293	1843	173	0.069862	-733.390831	0	82	0.069862	8200	-287.727712	788	1330	-44.0075	9100	-274	0.320012237537652	0.00766985425735851	-0.82813758074966	6.56451571616903e-17
21930000	21932000	AT5G54040	yes	Chr5	21928846	21930637	2.61756	2.99639	21924000	21926000	AT5G54030	yes	Chr5	21925983	21927243	1.49888	1.85952	5300	interaction579922	5-21930000	+	1998	5-21924000	+	1192	5509	53	0.069862	-162.4426	0	11	0.069862	1100	-18.498488	976	554	-43.9975	4200	-60	-4.83936233201045	7.57037721911891e-16	-5.40249749672936	8.84079868946656e-15
16234000	16236000	AT2G38860	NA	Chr2	16233314	16235235	0.638203	0.818171	16230000	16232000	AT2G38840	NA	Chr2	16227050	16232456	0.791895	0.689262	14200	interaction234357	2-16234000	+	2090	2-16230000	+	1590	3876	142	0.069862	-572.521251	0	61	0.069862	6100	-195.838228	1026	858	-43.949	8100	-214	-2.15808603619185	6.36344937521194e-11	-0.551105280996083	3.01682436265277e-10
24706000	24708000	AT1G66280	yes	Chr1	24706511	24709785	3.14498	1.51267	24702000	24704000	AT1G66270	yes	Chr1	24699989	24703041	4.01593	3.32437	5700	interaction122921	1-24706000	+	2226	1-24702000	+	902	3660	57	0.069862	-179.124426	0	13	0.069862	1300	-23.673693	872	345	-43.8443	4400	-66	-5.95777071295543	6.66448394214792e-28	-5.78625839190494	5.82729884505782e-25
19244000	19246000	AT3G51870	NA	Chr3	19243949	19246936	0.829464	0.776583	19238000	19240000	AT3G51860	yes	Chr3	19239426	19242913	1.83774	1.34644	2200	interaction352281	3-19244000	+	753	3-19238000	+	719	6560	22	0.069862	-49.722748	0	1	0.069862	100	-0.457848	436	352	-43.7842	2100	-18	2.7648428299262	1.198190870454e-49	-1.9548182653926	2.15817817533776e-08
18064000	18066000	AT5G44770	yes	Chr5	18065054	18066680	1.84488	3.00707	18058000	18060000	AT5G44750	NA	Chr5	18052607	18060169	0.731353	0.673691	8200	interaction560116	5-18064000	+	1831	5-18058000	+	1840	6217	82	0.069862	-285.259479	0	25	0.069862	2500	-59.251778	971	987	-43.6503	5700	-106	-5.20373547607163	2.01431994183917e-11	0.20248985576953	0.0474586859083171
10186000	10188000	AT4G18440	NA	Chr4	10186130	10188909	0.68499	0.698433	10184000	10186000	AT4G18430	yes	Chr4	10183716	10185280	1.25354	1.07241	8700	interaction425380	4-10186000	+	1334	4-10184000	+	1530	2348	87	0.069862	-308.47831	0	28	0.069862	2800	-69.458467	773	592	-43.6421	5900	-114	1.35581051278423	6.57152976063643e-06	-5.52495356382313	1.04227940492773e-40
4210000	4212000	AT3G13100	NA	Chr3	4208734	4214173	0.517757	0.561312	4204000	4206000	AT3G13090	NA	Chr3	4203012	4208171	0.464726	0.501133	11000	interaction274184	3-4210000	+	2870	3-4204000	+	1920	5817	110	0.069862	-414.440704	0	41	0.069862	4100	-115.807546	1555	993	-43.5702	6900	-154	-2.33207926652618	2.97223072109275e-13	-1.57464837668534	0.000114682682392851
19206000	19208000	AT2G46740	yes	Chr2	19205156	19207455	3.45928	3.45904	19192000	19194000	AT2G46710	NA	Chr2	19191934	19194849	0.939755	0.882381	2200	interaction249504	2-19206000	+	2905	2-19192000	+	1174	14238	22	0.069862	-49.607281	0	1	0.069862	100	-0.458225	1237	647	-43.5549	2100	-18	-4.53993022884591	4.61185116946836e-24	1.87498101787838	4.31034578575615e-38
5840000	5842000	AT5G17710	yes	Chr5	5839342	5841728	0.884426	0.820793	5830000	5832000	AT5G17700	yes	Chr5	5830580	5833901	2.51642	2.89521	3700	interaction498902	5-5840000	+	1385	5-5830000	+	1654	9621	37	0.069862	-100.763449	0	5	0.069862	500	-5.61944	692	785	-43.3258	3200	-36	1.67092783341888	1.50270247152514e-34	2.11506852771364	1.43936687797693e-19
794000	796000	AT5G03290	NA	Chr5	793973	796182	0.808881	0.791362	786000	788000	AT5G03280	NA	Chr5	787427	793356	0.712753	0.677132	2600	interaction472106	5-794000	+	2303	5-786000	+	651	7415	26	0.069862	-62.692171	0	2	0.069862	200	-1.330894	1324	371	-43.2976	2400	-22	-0.818526352273406	1.58120080862061e-09	-0.393804107957665	6.50516873337595e-06
24120000	24122000	AT1G64930	yes	Chr1	24120925	24122461	3.07876	3.28802	24118000	24120000	AT1G64920	yes	Chr1	24117439	24118798	2.32399	2.21812	15684.057641	interaction119729	1-24120000	+	3277	1-24118000	+	2048	2483	189	0.084187	-815.087504	0	72	0.069862	7200	-242.454503	1429	1023	-43.2657	8484.06	-304	-5.42570571532898	4.24898503733451e-14	-6.3169750623023	8.50225502681522e-47
5676000	5678000	AT3G16660	yes	Chr3	5676828	5677921	2.99988	3.90268	5672000	5674000	AT3G16650	yes	Chr3	5671066	5675324	1.2068	1.30912	19200	interaction281726	3-5676000	+	2144	3-5672000	+	2436	4091	192	0.069862	-830.712045	0	95	0.069862	9500	-345.682081	1160	1478	-43.2625	9700	-310	9.50322958528906	1.908853410648e-72	1.23041196076032	3.47586838961828e-05
7750000	7752000	AT4G13310	yes	Chr4	7750304	7753133	2.30196	2.10437	7744000	7746000	AT4G13300	yes	Chr4	7742870	7746363	2.77603	3.11178	11300	interaction412274	4-7750000	+	2086	4-7744000	+	2561	5891	113	0.069862	-428.505526	0	43	0.069862	4300	-123.406472	976	1426	-43.1254	7000	-160	-5.8436265144244	7.15377954823527e-18	-6.10670377558016	4.59128580795761e-18
2340000	2342000	AT5G07400	yes	Chr5	2340641	2345458	0.705946	0.673439	2338000	2340000	AT5G07390	NA	Chr5	2335894	2339913	0.597241	0.644617	5200	interaction480382	5-2340000	+	792	5-2338000	+	2444	2293	52	0.069862	-158.989727	0	11	0.069862	1100	-18.536717	380	1076	-43.088	4100	-58	-1.06104584228536	1.66510372496152e-07	-6.31854655188618	5.91208232685293e-68
12764000	12766000	AT2G29940	yes	Chr2	12760138	12766623	1.10414	1.20105	12752000	12754000	AT2G29910	NA	Chr2	12751146	12753117	0.739635	0.761247	3000	interaction215883	2-12764000	+	3670	2-12752000	+	820	11926	30	0.069862	-76.127628	0	3	0.069862	300	-2.52461	2460	435	-43.0631	2700	-28	5.60349731111681	1.67481282677257e-69	0.290355987770077	0.0159702251460336
10476000	10478000	AT2G24640	NA	Chr2	10475209	10479454	0.813963	0.72104	10470000	10472000	AT2G24630	NA	Chr2	10471302	10474503	0.72705	0.655327	6900	interaction203875	2-10476000	+	2393	2-10470000	+	879	4966	69	0.069862	-229.840417	0	19	0.069862	1900	-40.672198	1442	407	-43.0356	5000	-86	-0.456191028145004	0.0187102957773522	0.87043089097826	7.15659421667812e-10
422000	424000	AT3G02250	NA	Chr3	423800	427061	0.84275	0.759463	418000	420000	AT3G02240	yes	Chr3	418458	419164	3.58924	2.72789	7100	interaction254228	3-422000	+	909	3-418000	+	1570	3181	71	0.069862	-238.418548	0	20	0.069862	2000	-43.694368	428	699	-43.0225	5100	-88	1.49061145572266	1.10072593439952e-65	-3.43647661582699	3.12226504975319e-26
3450000	3452000	AT1G10480	yes	Chr1	3449690	3451226	4.30043	2.68336	3432000	3434000	AT1G10450	NA	Chr1	3431779	3438370	0.754382	0.672964	2600	interaction18071	1-3450000	+	2115	1-3432000	+	1760	17656	26	0.069862	-62.395624	0	2	0.069862	200	-1.330894	622	923	-43.0097	2400	-22	-4.70859978171962	4.53585291539041e-11	-0.322848026035472	0.00741571675122111
20634000	20636000	AT1G55320	NA	Chr1	20633359	20636892	0.563811	0.544614	20630000	20632000	AT1G55310	NA	Chr1	20630064	20632973	0.757343	0.826471	12700	interaction102070	1-20634000	+	2030	1-20630000	+	1626	3920	127	0.069862	-497.521872	0	52	0.069862	5200	-159.00912	1282	783	-42.9729	7500	-186	-1.72745628427658	1.21859811986794e-07	-0.443703220215026	0.00262797238570879
28352000	28354000	AT1G75520	yes	Chr1	28351561	28353495	5.1419	5.04138	28348000	28350000	AT1G75510	yes	Chr1	28347054	28348735	0.998519	0.988128	13300	interaction141652	1-28352000	+	2699	1-28348000	+	1464	3552	133	0.069862	-527.869273	0	56	0.069862	5600	-175.285526	1347	781	-42.9492	7700	-196	-0.627201269470415	0.017906369856393	-0.272323258101593	0.0347174173253677
17156000	17158000	AT2G41160	NA	Chr2	17156028	17158880	0.752398	0.767323	17154000	17156000	AT2G41150	NA	Chr2	17153843	17155983	0.667232	0.653912	17800	interaction239221	2-17156000	+	1241	2-17154000	+	2231	1891	178	0.069862	-762.066264	0	87	0.069862	8700	-311.388402	670	1283	-42.9149	9100	-284	-0.506691913513817	0.000134844869733391	-1.7116321940601	6.06319815383425e-07
10262000	10264000	AT2G24140	NA	Chr2	10262553	10264033	0.673252	0.72058	10260000	10262000	AT2G24130	yes	Chr2	10258147	10261220	0.74156	0.736272	18100	interaction202651	2-10262000	+	1807	2-10260000	+	2110	2350	181	0.069862	-773.672796	0	88	0.069862	8800	-313.8804	1034	1153	-42.9109	9300	-290	-2.83096196278023	3.91617479764236e-13	-3.45586275371613	1.6222001979483e-06
22846000	22848000	AT1G61840	yes	Chr1	22847388	22849833	2.60548	3.11697	22836000	22838000	AT1G61820	yes	Chr1	22835077	22838615	2.42394	1.35935	3000	interaction113084	1-22846000	+	1294	1-22836000	+	1605	10184	30	0.069862	-75.942172	0	3	0.069862	300	-2.524079	544	682	-42.9053	2700	-28	-4.67492372188926	3.89968387289612e-58	-3.01394948328043	1.96511552452776e-28
26330000	26332000	AT5G65800	yes	Chr5	26330745	26332812	3.32588	2.71389	26322000	26324000	AT5G65790	yes	Chr5	26322947	26324578	2.91124	2.57705	5000	interaction601593	5-26330000	+	1925	5-26322000	+	1587	8164	50	0.069862	-150.207438	0	10	0.069862	1000	-16.072206	910	588	-42.8366	4000	-56	-3.74074350200286	1.06857257503397e-12	-5.16566574375695	1.76258839082746e-73
20920000	20922000	AT5G51510	yes	Chr5	20921432	20922978	0.973778	0.898222	20918000	20920000	AT5G51500	yes	Chr5	20917928	20919838	3.69648	3.97632	16976.029299	interaction574737	5-20920000	+	2118	5-20918000	+	3733	1930	241	0.09918	-1099.583214	0	82	0.069862	8200	-287.120602	914	1691	-42.7541	8776.03	-412	-0.596873438558416	7.69546636255071e-07	-5.67931859543542	6.13098401330105e-14
20466000	20468000	AT5G50300	yes	Chr5	20466067	20468124	4.06442	3.36419	20464000	20466000	AT5G50290	yes	Chr5	20461776	20464177	1.47816	1.3299	22187.558171	interaction572813	5-20466000	+	4306	5-20464000	+	1947	2491	334	0.105167	-1641.921147	0	120	0.069862	12000	-466.000527	1904	1017	-42.7181	10187.6	-614	-4.49560254984728	4.03112565550415e-11	-1.16402515272581	0.000909709811153313
6856000	6858000	AT4G11270	NA	Chr4	6854363	6859664	0.703813	0.620717	6852000	6854000	AT4G11260	NA	Chr4	6851276	6853860	0.852259	0.797136	6900	interaction407857	4-6856000	+	2968	4-6852000	+	1128	4020	69	0.069862	-229.239496	0	19	0.069862	1900	-40.578157	1819	537	-42.7028	5000	-84	-0.246231992525183	0.0239984798027918	-0.30736570953563	0.0410063428460085
18642000	18644000	AT3G50300	yes	Chr3	18643954	18645406	1.09228	0.972185	18640000	18642000	AT3G50290	yes	Chr3	18640171	18640993	1.69979	2.08384	14200	interaction349183	3-18642000	+	1869	3-18640000	+	1528	2711	142	0.069862	-572.789739	0	62	0.069862	6200	-200.23496	936	789	-42.6694	8000	-214	-5.46401721719268	4.02685201755766e-62	-4.56364031233313	1.09558635489172e-14
16514000	16516000	AT5G41300	yes	Chr5	16515003	16516102	1.52015	2.57312	16512000	16514000	AT5G41290	yes	Chr5	16512325	16513500	2.60439	3.25836	11200	interaction552350	5-16514000	+	1456	5-16512000	+	1762	2575	112	0.069862	-425.048577	0	43	0.069862	4300	-123.545459	847	892	-42.6512	6900	-158	-4.59459994047638	1.99402708387402e-19	-3.61485470735292	5.83324642732389e-12
18316000	18318000	AT3G49390	NA	Chr3	18314526	18317998	0.811766	0.74061	18312000	18314000	AT3G49380	yes	Chr3	18311908	18313490	1.7197	1.03613	14400	interaction347574	3-18316000	+	2057	3-18312000	+	1931	3964	144	0.069862	-581.44597	0	63	0.069862	6300	-204.154618	1086	897	-42.6032	8100	-218	-0.739971784463501	4.25522428338222e-19	-3.30600303869112	5.75461487869127e-07
6412000	6414000	AT5G19110	yes	Chr5	6411560	6413170	3.82286	2.97386	6408000	6410000	AT5G19100	yes	Chr5	6408241	6409417	1.58343	1.32423	11200	interaction502174	5-6412000	+	1584	5-6408000	+	2559	4192	112	0.069862	-424.691834	0	43	0.069862	4300	-123.625934	787	1270	-42.5078	6900	-158	-3.50906838692962	2.31768615658468e-25	-3.16720978065053	4.1530780272216e-26
16002000	16004000	AT3G44326	yes	Chr3	16000878	16002118	3.77111	1.54936	15994000	15996000	AT3G44320	yes	Chr3	15993378	15995811	1.21555	0.838396	5200	interaction334881	3-16002000	+	1326	3-15994000	+	1966	8159	52	0.069862	-158.316885	0	11	0.069862	1100	-18.501605	534	1018	-42.4208	4100	-58	-5.96547641490072	6.32503063543179e-17	-3.34816520945564	6.44148309843282e-53
20680000	20682000	AT1G55390	yes	Chr1	20680875	20683043	2.49412	2.42857	20678000	20680000	AT1G55380	yes	Chr1	20676621	20678607	1.34896	1.07311	12700	interaction102353	1-20680000	+	3557	1-20678000	+	1093	2202	127	0.069862	-500.050922	0	53	0.069862	5300	-163.951983	1883	521	-42.4197	7400	-186	-2.98900465906309	1.96115367517886e-13	-2.66178678008633	1.02868407913027e-14
19422000	19424000	AT1G52160	NA	Chr1	19420714	19424439	0.742493	0.752784	19418000	19420000	AT1G52155	NA	Chr1	19417665	19419853	0.776938	0.791881	12800	interaction96230	1-19422000	+	2262	1-19418000	+	1844	4016	128	0.069862	-501.842137	0	53	0.069862	5300	-162.564194	1276	1078	-42.2079	7500	-188	-0.674356103139212	0.000108220828337128	-1.04026150158954	2.38749088245361e-14
15004000	15006000	AT2G35700	yes	Chr2	15005204	15005789	2.96128	3.18089	15002000	15004000	AT2G35690	yes	Chr2	14999753	15003066	0.827041	0.780975	14100	interaction228025	2-15004000	+	879	2-15002000	+	2541	2145	141	0.069862	-572.883071	0	63	0.069862	6300	-206.831668	413	1458	-42.1912	7800	-214	3.80378214698624	6.28544568165e-11	1.0823477866414	8.02016967501993e-25
15174000	15176000	AT5G38030	yes	Chr5	15171245	15175457	3.88317	3.80178	15166000	15168000	AT5G38020	yes	Chr5	15165651	15167729	3.08552	3.20304	4200	interaction545694	5-15174000	+	1321	5-15166000	+	1714	7756	42	0.069862	-119.376389	0	7	0.069862	700	-9.419082	609	782	-42.0256	3500	-44	-4.64026154845719	1.55206079295384e-20	-4.2729980925246	1.1055619152844e-16
20282000	20284000	AT1G54340	yes	Chr1	20283479	20286786	0.985237	0.906576	20280000	20282000	AT1G54330	yes	Chr1	20279566	20280952	4.23691	5.37955	14000	interaction100106	1-20282000	+	1702	1-20280000	+	1959	2036	140	0.069862	-562.011499	0	61	0.069862	6100	-195.84076	857	993	-42.0075	7900	-210	-0.445161767683694	6.12179856549953e-06	-1.92038898368192	5.98345638767364e-06
6050000	6052000	AT1G17590	NA	Chr1	6050192	6052568	0.658478	0.738921	6048000	6050000	AT1G17580	NA	Chr1	6039302	6049556	0.781924	0.676528	11500	interaction31878	1-6050000	+	2037	1-6048000	+	1905	1926	115	0.069862	-438.4031	0	45	0.069862	4500	-130.979626	1160	1094	-41.9636	7000	-164	-1.66097636884288	2.45341306981345e-15	0.699362146404545	2.07613777888484e-05
16698000	16700000	AT4G35080	NA	Chr4	16698333	16700321	0.726934	0.677227	16694000	16696000	AT4G35070	yes	Chr4	16694169	16695698	0.791152	0.735814	4700	interaction459241	4-16698000	+	1816	4-16694000	+	1377	4424	47	0.069862	-138.542637	0	9	0.069862	900	-13.745607	992	594	-41.8389	3800	-50	-0.985673397544318	5.00065433334748e-21	1.46879681653434	4.54414395171152e-05
7306000	7308000	AT3G20860	yes	Chr3	7306146	7308434	0.734124	0.709456	7300000	7302000	AT3G20840	yes	Chr3	7300674	7303693	3.52684	3.42983	8400	interaction290774	3-7306000	+	1862	3-7300000	+	2317	5598	84	0.069862	-294.168603	0	27	0.069862	2700	-65.898578	872	1026	-41.8322	5700	-110	-0.533832632710284	0.000152980928902656	-4.94322463609349	6.38179562685809e-10
11986000	11988000	AT4G22820	NA	Chr4	11987704	11989006	0.864313	0.846417	11984000	11986000	AT4G22810	yes	Chr4	11984139	11985702	4.54574	3.8403	9400	interaction434117	4-11986000	+	559	4-11984000	+	3507	2132	94	0.069862	-345.380823	0	34	0.069862	3400	-91.554019	276	1409	-41.7955	6000	-128	-1.34806493377279	6.08653579837854e-08	-5.41664451019161	1.12726789762446e-28
21928000	21930000	AT5G54040	yes	Chr5	21928846	21930637	2.61756	2.99639	21924000	21926000	AT5G54030	yes	Chr5	21925983	21927243	1.49888	1.85952	9400	interaction579911	5-21928000	+	3721	5-21924000	+	1192	3478	94	0.069862	-340.93973	0	33	0.069862	3300	-86.939946	1729	554	-41.6994	6100	-126	-4.83936233201045	7.57037721911891e-16	-5.40249749672936	8.84079868946656e-15
5776000	5778000	AT3G16920	yes	Chr3	5776485	5777889	3.17709	3.51703	5774000	5776000	AT3G16910	NA	Chr3	5773054	5775501	0.672825	0.730815	12900	interaction282201	3-5776000	+	1983	3-5774000	+	1852	1780	129	0.069862	-506.753421	0	54	0.069862	5400	-166.944143	858	1013	-41.674	7500	-190	-1.78588976939552	1.7724182774761e-05	-1.38788212425146	2.11394445594125e-09
21474000	21476000	AT1G58037	yes	Chr1	21472964	21474602	1.68892	2.58562	21468000	21470000	AT1G58030	NA	Chr1	21464000	21468420	0.778915	0.723964	6500	interaction106282	1-21474000	+	2017	1-21468000	+	1644	5671	65	0.069862	-211.570762	0	17	0.069862	1700	-34.569158	1139	1001	-41.6656	4800	-78	-5.08519897400567	2.09477642777649e-18	-0.718836031743367	0.0321666145226311
21700000	21702000	AT1G58410	yes	Chr1	21701184	21704255	2.46631	0.919256	21698000	21700000	AT1G58400	yes	Chr1	21696164	21699118	1.68067	0.699324	8900	interaction107519	1-21700000	+	2135	1-21698000	+	1487	2284	89	0.069862	-317.270135	0	30	0.069862	3000	-76.196001	1025	723	-41.65	5900	-118	-2.73487438973555	1.21555502561119e-19	-2.80330429409212	4.34060113728482e-08
17688000	17690000	AT3G47940	NA	Chr3	17687955	17689549	0.687087	0.711658	17684000	17686000	AT3G47930	NA	Chr3	17684443	17687620	0.629981	0.623236	16500	interaction344169	3-17688000	+	1823	3-17684000	+	2457	3434	165	0.069862	-689.513385	0	78	0.069862	7800	-268.870429	1015	1497	-41.6242	8700	-258	0.353346992963983	0.0368462726757429	0.462444680024597	0.0455503077449857
16456000	16458000	AT2G39410	yes	Chr2	16455568	16458217	3.73128	2.96518	16452000	16454000	AT2G39400	yes	Chr2	16452611	16454801	1.44075	1.12963	8700	interaction235537	2-16456000	+	1711	2-16452000	+	1277	3842	87	0.069862	-308.606444	0	29	0.069862	2900	-72.838789	640	625	-41.5953	5800	-114	-3.96540979953776	8.28087859285305e-134	2.07540790240307	3.93267362658765e-16
6602000	6604000	AT5G19560	yes	Chr5	6603290	6606448	1.43543	1.11551	6598000	6600000	AT5G19550	NA	Chr5	6598016	6601819	0.787098	0.786772	12900	interaction503177	5-6602000	+	1991	5-6598000	+	2099	3829	129	0.069862	-506.432375	0	54	0.069862	5400	-166.505292	1164	1183	-41.5593	7500	-188	-4.84813940922278	3.02364322298786e-11	-1.07896969264127	2.78593145917428e-05
206000	208000	AT3G01516	yes	Chr3	207335	208086	3.43814	3.09525	202000	204000	AT3G01513	yes	Chr3	201919	202740	1.70685	1.35982	7600	interaction253023	3-206000	+	1395	3-202000	+	1451	4125	76	0.069862	-259.235531	0	23	0.069862	2300	-52.912868	672	696	-41.4815	5300	-96	-4.03975421672651	1.17857426241712e-15	-5.85525950222882	3.44802963584879e-20
244000	246000	AT1G01670	yes	Chr1	242842	245988	1.61456	1.11835	240000	242000	AT1G01660	NA	Chr1	240056	242608	0.731599	0.68741	15800	interaction956	1-244000	+	1373	1-240000	+	2205	4020	158	0.069862	-655.62065	0	74	0.069862	7400	-252.328402	723	1274	-41.4015	8400	-244	-1.28513851745934	0.00010954880228924	-2.55323443280089	1.97028045718748e-07
6922000	6924000	AT3G19900	NA	Chr3	6922566	6925066	0.934954	0.850675	6918000	6920000	AT3G19895	yes	Chr3	6917293	6921556	0.977429	0.996794	11189.22919	interaction288556	3-6922000	+	1705	3-6918000	+	3328	4135	114	0.071178	-434.004097	0	44	0.069862	4400	-127.398336	834	1879	-41.3985	6789.23	-162	1.56441354417132	2.89323868314059e-13	-0.512797343696886	2.9375905926053e-05
17238000	17240000	AT3G46810	yes	Chr3	17238235	17240623	1.99096	3.1234	17236000	17238000	AT3G46800	yes	Chr3	17234493	17236542	2.6107	3.60236	17600	interaction341746	3-17238000	+	1706	3-17236000	+	2487	2685	176	0.069862	-747.755334	0	86	0.069862	8600	-304.764103	1034	1357	-41.3884	9000	-280	-5.38380149853193	4.67496844963605e-31	-4.90368526440427	8.67925568820135e-12
402000	404000	AT4G00940	yes	Chr4	403319	404810	3.75237	2.34692	400000	402000	AT4G00930	NA	Chr4	396557	400734	0.638883	0.62787	9500	interaction376178	4-402000	+	1777	4-400000	+	937	2739	95	0.069862	-346.638744	0	34	0.069862	3400	-90.648152	979	494	-41.3835	6100	-128	-2.4614438234985	1.24328111442098e-21	-0.283702816018032	0.0424420437897004
23910000	23912000	AT5G59270	NA	Chr5	23911150	23913235	0.432836	0.559794	23908000	23910000	AT5G59260	NA	Chr5	23907900	23909925	0.536786	0.616985	22954.390915	interaction589983	5-23910000	+	1937	5-23908000	+	2906	2194	232	0.07061	-1050.582781	0	125	0.069862	12500	-490.639551	1024	1701	-41.3278	10454.4	-392	-5.53064462233816	9.03075211391896e-20	-3.61271058737568	3.72075514900431e-11
25660000	25662000	AT5G64120	yes	Chr5	25659305	25661002	4.88189	5.34733	25654000	25656000	AT5G64110	yes	Chr5	25654073	25656030	4.7651	5.19508	8700	interaction598735	5-25660000	+	1595	5-25654000	+	2298	5785	87	0.069862	-308.010843	0	29	0.069862	2900	-72.806524	659	870	-41.3169	5800	-114	-2.56657160448643	1.53594421712067e-11	3.33691506074173	4.46464744634949e-83
4518000	4520000	AT5G14000	NA	Chr5	4518007	4519300	0.690938	0.678156	4516000	4518000	AT5G13990	yes	Chr5	4514567	4516892	0.910968	0.836999	10200	interaction492028	5-4518000	+	1145	5-4516000	+	2346	1609	102	0.069862	-378.519739	0	38	0.069862	3800	-105.08012	599	1413	-41.2847	6400	-140	-3.01672406478309	9.63425820124693e-28	-3.77732369321281	2.5447846740208e-19
19264000	19266000	AT1G51870	yes	Chr1	19262878	19267001	2.15863	3.00905	19260000	19262000	AT1G51860	yes	Chr1	19257633	19261479	1.06514	1.24629	15159.901361	interaction95232	1-19264000	+	1606	1-19260000	+	4026	3644	176	0.081107	-748.354245	0	70	0.069862	7000	-233.679106	1065	2316	-41.2824	8159.9	-280	-4.99840670172262	6.17323042450743e-13	-3.9470916890788	1.17390857614013e-46
18642000	18644000	AT3G50300	yes	Chr3	18643954	18645406	1.09228	0.972185	18638000	18640000	AT3G50280	yes	Chr3	18637853	18639185	0.917462	0.900601	8500	interaction349182	3-18642000	+	1869	3-18638000	+	1397	4426	85	0.069862	-299.303723	0	28	0.069862	2800	-69.430755	936	620	-41.2318	5700	-112	-5.46401721719268	4.02685201755766e-62	-4.13983450195891	1.05636314555195e-11
4836000	4838000	AT5G14950	yes	Chr5	4837151	4841942	0.788682	0.659935	4832000	4834000	AT5G14940	yes	Chr5	4831747	4834395	2.93437	1.83322	8700	interaction493552	5-4836000	+	1862	5-4832000	+	1752	4265	87	0.069862	-307.797917	0	29	0.069862	2900	-72.664381	1038	868	-41.1934	5800	-114	-0.427925762530604	0.00207954009512182	-1.53005829970696	5.94287949468566e-09
8658000	8660000	AT1G24430	yes	Chr1	8658002	8659506	0.691234	0.910911	8656000	8658000	AT1G24420	NA	Chr1	8656686	8657997	0.528578	0.745912	30900	interaction45471	1-8658000	+	2542	1-8656000	+	1931	1729	309	0.069862	-1493.297441	0	186	0.069862	18600	-807.856643	1447	1046	-41.1556	12300	-558	-5.40193693001447	3.51896726541734e-19	-4.73167837846778	9.47253668422067e-13
25020000	25022000	AT1G67040	NA	Chr1	25019104	25022542	0.626797	0.603134	25016000	25018000	AT1G67030	yes	Chr1	25016542	25017512	3.2527	1.11995	7200	interaction124654	1-25020000	+	1264	1-25016000	+	2049	3889	72	0.069862	-241.970187	0	21	0.069862	2100	-46.6199	673	807	-41.1413	5100	-90	2.8625687706225	1.1683321315715e-35	-4.9281404545665	5.49188648773401e-29
2328000	2330000	AT1G07560	NA	Chr1	2327319	2331096	0.628365	0.649006	2322000	2324000	AT1G07550	yes	Chr1	2322652	2326561	1.04023	1.15089	11859.733524	interaction12017	1-2328000	+	2935	1-2322000	+	2272	5755	142	0.083648	-570.556691	0	48	0.069862	4800	-142.582097	1601	1181	-41.1276	7059.73	-212	-5.55188428759143	1.17986910261833e-20	-5.89004477162367	3.85914472306686e-58
5578000	5580000	AT3G16420	yes	Chr3	5579385	5580953	2.04457	1.96203	5572000	5574000	AT3G16410	yes	Chr3	5571991	5574541	2.33482	2.54081	7200	interaction281166	3-5578000	+	1691	3-5572000	+	2876	6554	72	0.069862	-241.456185	0	21	0.069862	2100	-46.696151	533	1196	-41.0905	5100	-90	-1.48347976613498	0.00673681941841922	-4.06210710584225	3.8050475675441e-40
5320000	5322000	AT3G15700	yes	Chr3	5321135	5322376	1.14794	2.00139	5318000	5320000	AT3G15690	yes	Chr3	5316915	5319613	0.874979	0.805116	20800	interaction279894	3-5320000	+	1882	3-5318000	+	2474	2258	208	0.069862	-918.565602	0	109	0.069862	10900	-411.507622	1218	1489	-41.0485	9900	-344	-4.47953555514894	1.73867183159078e-18	1.79334910714216	1.89869640273647e-90
17262000	17264000	AT5G43040	yes	Chr5	17263964	17265620	3.00455	3.28253	17260000	17262000	AT5G43030	yes	Chr5	17258990	17260685	3.1907	2.85145	16200	interaction556157	5-17262000	+	1414	5-17260000	+	2732	2081	162	0.069862	-676.12959	0	77	0.069862	7700	-266.481288	605	1500	-41.0346	8500	-252	-2.48307242687383	6.07507653557663e-18	-4.71239520578968	1.98550882829519e-34
3704000	3706000	AT5G11540	yes	Chr5	3703001	3704981	4.43865	4.9693	3700000	3702000	AT5G11530	yes	Chr5	3695861	3701548	2.50162	2.59836	7400	interaction487678	5-3704000	+	1985	5-3700000	+	1426	3581	74	0.069862	-250.436142	0	22	0.069862	2200	-49.696574	885	788	-40.988	5200	-92	-2.96172344585519	2.25871611550645e-07	0.341802489272609	0.00647053452485866
15326000	15328000	AT5G38344	yes	Chr5	15325830	15326988	1.86513	1.64855	15322000	15324000	AT5G38340	yes	Chr5	15320506	15324061	1.298	1.944	7700	interaction546474	5-15326000	+	912	5-15322000	+	1937	3262	77	0.069862	-264.771198	0	24	0.069862	2400	-56.304159	461	974	-40.9757	5300	-98	-5.57081524374149	1.28035249300533e-26	-3.27133690712412	2.50842584532467e-79
20270000	20272000	AT5G49870	yes	Chr5	20270191	20272548	1.25772	1.68917	20262000	20264000	AT5G49850	yes	Chr5	20259907	20262585	1.34736	1.58012	5800	interaction571645	5-20270000	+	1745	5-20262000	+	1591	8085	58	0.069862	-182.455384	0	14	0.069862	1400	-26.22769	1036	751	-40.9534	4400	-68	-4.12749600864498	6.03217191231172e-10	-2.38799067126757	3.23269488306557e-07
7516000	7518000	AT3G21350	NA	Chr3	7517069	7518744	0.817434	0.892063	7514000	7516000	AT3G21340	yes	Chr3	7511786	7515937	1.90081	2.61663	15200	interaction292064	3-7516000	+	1561	3-7514000	+	3026	1762	152	0.069862	-623.560054	0	70	0.069862	7000	-234.600878	763	1687	-40.9273	8200	-232	0.405059184564278	0.00108545367614196	-5.35090827186059	9.88421189047334e-17
21252000	21254000	AT1G56690	NA	Chr1	21253816	21255931	0.785474	0.752529	21250000	21252000	AT1G56680	yes	Chr1	21250337	21251417	1.4396	1.54847	8900	interaction105374	1-21252000	+	743	1-21250000	+	1784	2072	89	0.069862	-320.017013	0	31	0.069862	3100	-80.094718	432	1002	-40.9262	5800	-120	-0.563988475207897	0.0334421404248989	-5.08277064042772	7.52586499890287e-05
18886000	18888000	AT2G45900	NA	Chr2	18886068	18888674	0.565727	0.469573	18884000	18886000	AT2G45890	NA	Chr2	18883472	18885566	0.588596	0.653744	29300	interaction248060	2-18886000	+	2225	2-18884000	+	1831	2022	293	0.069862	-1400.604539	0	174	0.069862	17400	-742.729235	1319	1082	-40.9258	11900	-524	2.17743221638006	1.81997382000147e-09	-2.0248321379812	1.25783649605365e-11
23048000	23050000	AT3G62280	NA	Chr3	23049422	23051152	0.785313	0.868333	23042000	23044000	AT3G62270	yes	Chr3	23042283	23046048	0.650223	0.670881	8100	interaction371951	3-23048000	+	1262	3-23042000	+	1957	5967	81	0.069862	-281.616028	0	26	0.069862	2600	-62.713529	623	876	-40.9092	5500	-104	-4.26019139950405	4.47630247805929e-29	-4.36960121646189	5.59174839719201e-60
17002000	17004000	AT1G44970	yes	Chr1	17002116	17003688	0.762637	1.16747	17000000	17002000	AT1G44960	NA	Chr1	16999537	17001729	0.806028	0.74304	20800	interaction83151	1-17002000	+	1507	1-17000000	+	1528	1585	208	0.069862	-921.644392	0	110	0.069862	11000	-417.555155	1027	981	-40.8434	9800	-344	-3.38386382884128	2.08894173274072e-87	-0.67638288510596	1.76901459628885e-05
16770000	16772000	AT4G35250	NA	Chr4	16771170	16773364	0.773147	0.640093	16766000	16768000	AT4G35240	NA	Chr4	16760948	16767087	0.796271	0.850736	6900	interaction459606	4-16770000	+	1964	4-16766000	+	700	3608	69	0.069862	-230.546078	0	20	0.069862	2000	-43.766116	1190	365	-40.8107	4900	-86	4.92443679998691	7.52037188927852e-215	0.773695641499282	1.15460813013814e-11
17882000	17884000	AT5G44390	yes	Chr5	17882195	17885004	1.06056	1.04797	17878000	17880000	AT5G44380	yes	Chr5	17878721	17881440	1.35115	1.13921	11700	interaction559217	5-17882000	+	1863	5-17878000	+	2001	3840	117	0.069862	-448.125465	0	47	0.069862	4700	-138.896636	945	1058	-40.7984	7000	-168	-0.991705587583429	0.00450537708592027	-5.01517303446206	1.91909759561069e-58
25646000	25648000	AT1G68400	yes	Chr1	25646038	25648946	0.895761	0.970177	25644000	25646000	AT1G68390	yes	Chr1	25642733	25645607	2.0976	1.59724	11100	interaction128041	1-25646000	+	1632	1-25644000	+	1040	2010	111	0.069862	-422.007889	0	44	0.069862	4400	-128.326865	904	460	-40.7159	6700	-158	1.75675145778025	1.5838426865419e-23	-1.92347595629611	3.66016764928941e-08
3992000	3994000	AT5G12340	yes	Chr5	3992947	3993610	4.68717	4.25809	3986000	3988000	AT5G12330	yes	Chr5	3987374	3989833	4.25385	2.35863	6400	interaction489208	5-3992000	+	1623	5-3986000	+	1971	5750	64	0.069862	-207.372837	0	17	0.069862	1700	-34.613343	735	946	-40.6941	4700	-76	-5.05852201666721	8.42220445781956e-15	-3.10758976250466	5.92725721509833e-08
22646000	22648000	AT1G61380	NA	Chr1	22646071	22649521	0.689681	0.638807	22644000	22646000	AT1G61370	NA	Chr1	22642095	22645147	0.672252	0.639721	12300	interaction112008	1-22646000	+	2405	1-22644000	+	1661	2179	123	0.069862	-477.775603	0	51	0.069862	5100	-154.752804	1477	917	-40.6503	7200	-178	1.81414926536058	1.03066136546542e-08	-1.9328851201343	4.39052268633757e-13
3448000	3450000	AT1G10480	yes	Chr1	3449690	3451226	4.30043	2.68336	3440000	3442000	AT1G10460	NA	Chr1	3439321	3440320	0.844377	0.774771	2100	interaction18056	1-3448000	+	1789	1-3440000	+	1042	7921	21	0.069862	-46.517817	0	1	0.069862	100	-0.458038	495	457	-40.6296	2000	-16	-4.70859978171962	4.53585291539041e-11	-2.82501704718274	1.19278529576401e-15
7616000	7618000	AT3G21630	NA	Chr3	7615384	7618581	0.767465	0.767694	7612000	7614000	AT3G21620	NA	Chr3	7610957	7614461	0.610851	0.639692	12800	interaction292758	3-7616000	+	2095	3-7612000	+	2542	3801	128	0.069862	-501.298202	0	54	0.069862	5400	-166.531054	1140	1520	-40.5718	7400	-186	-0.860099822924047	0.0009012183326925	-4.29342073973525	2.32020966049318e-24
2630000	2632000	AT1G08340	yes	Chr1	2631067	2632871	0.914048	0.944728	2626000	2628000	AT1G08320	yes	Chr1	2621903	2627848	2.96419	2.57187	3800	interaction13704	1-2630000	+	2366	1-2626000	+	828	3990	38	0.069862	-104.760249	0	6	0.069862	600	-7.463353	1160	297	-40.5309	3200	-38	-2.70487530280416	3.76571092002045e-55	-4.66740960905758	6.36294007121691e-52
4162000	4164000	AT1G12260	yes	Chr1	4162831	4165852	3.80067	4.54031	4160000	4162000	AT1G12250	NA	Chr1	4159264	4161455	0.90393	0.867031	16600	interaction22016	1-4162000	+	2386	1-4160000	+	1548	2535	166	0.069862	-696.133295	0	80	0.069862	8000	-278.309909	1296	872	-40.5254	8600	-260	-1.26318791709931	3.14444797827291e-09	3.99686521279688	5.31648942108965e-63
30366000	30368000	AT1G80810	NA	Chr1	30365286	30368898	0.63244	0.618938	30360000	30362000	AT1G80790	NA	Chr1	30359722	30363307	0.735894	0.645795	6000	interaction151359	1-30366000	+	1865	1-30360000	+	2283	5988	60	0.069862	-190.539582	0	15	0.069862	1500	-28.928428	984	1295	-40.4714	4500	-70	0.472134584684665	0.0385460613198727	0.550307833013135	0.0251636773666922
8812000	8814000	AT4G15400	yes	Chr4	8811927	8813478	3.24368	4.65561	8808000	8810000	AT4G15396	yes	Chr4	8807526	8810512	2.81305	3.34479	8700	interaction418213	4-8812000	+	2969	4-8808000	+	786	3673	87	0.069862	-310.510998	0	30	0.069862	3000	-76.656085	1598	405	-40.4619	5700	-116	-5.75453877517314	3.78425722407549e-30	-5.45144404825165	1.50193762296631e-14
16828000	16830000	AT4G35390	yes	Chr4	16829325	16830692	3.59242	1.78552	16824000	16826000	AT4G35380	NA	Chr4	16819882	16826061	0.576133	0.639635	11107.33903	interaction459919	4-16828000	+	2093	4-16824000	+	3857	4267	161	0.101265	-667.801313	0	44	0.069862	4400	-127.427391	813	2060	-40.4594	6707.34	-250	-4.28802870254628	1.81072416419395e-50	-4.78979879113048	3.28501968304002e-89
20382000	20384000	AT5G50120	yes	Chr5	20382614	20383874	2.8192	1.82794	20374000	20376000	AT5G50110	NA	Chr5	20373514	20376207	0.861364	0.835847	6600	interaction572296	5-20382000	+	2725	5-20374000	+	1430	8159	66	0.069862	-215.995517	0	18	0.069862	1800	-37.499176	1377	872	-40.4513	4800	-80	-3.01383772415288	2.14160467945371e-17	1.58873797172413	1.16603888469373e-26
2842000	2844000	AT3G09260	yes	Chr3	2840476	2843781	1.95535	1.02555	2836000	2838000	AT3G09240	NA	Chr3	2835667	2837956	0.528513	0.639672	5700	interaction266544	3-2842000	+	1032	3-2836000	+	3844	5364	57	0.069862	-178.900173	0	14	0.069862	1400	-26.409995	278	1760	-40.4362	4300	-66	-3.32343842690156	4.04729596231981e-12	-4.39271775997935	5.87859471068773e-27
5838000	5840000	AT5G17710	yes	Chr5	5839342	5841728	0.884426	0.820793	5830000	5832000	AT5G17700	yes	Chr5	5830580	5833901	2.51642	2.89521	5100	interaction498891	5-5838000	+	1955	5-5830000	+	1654	7673	51	0.069862	-154.139059	0	11	0.069862	1100	-18.474061	932	785	-40.3217	4000	-56	1.67092783341888	1.50270247152514e-34	2.11506852771364	1.43936687797693e-19
23082000	23084000	AT1G62380	yes	Chr1	23082169	23084253	0.908111	1.11167	23072000	23074000	AT1G62370	yes	Chr1	23072574	23073189	0.504688	0.963288	6200	interaction114374	1-23082000	+	1645	1-23072000	+	1805	10128	62	0.069862	-198.97753	0	16	0.069862	1600	-31.714194	1048	1032	-40.3108	4600	-74	1.70524185033406	1.15323030335887e-48	-2.90958131174749	7.91577089499298e-23
21212000	21214000	AT5G52240	NA	Chr5	21213057	21214739	0.810347	0.925982	21210000	21212000	AT5G52230	NA	Chr5	21207887	21211986	0.757041	0.656621	6100	interaction576296	5-21212000	+	966	5-21210000	+	1781	2354	61	0.069862	-195.596393	0	16	0.069862	1600	-31.844113	459	1014	-40.1963	4500	-72	-0.63755238044854	3.24531015927753e-09	0.456284390410424	3.25155441070056e-05
20442000	20444000	AT3G55150	NA	Chr3	20440549	20442604	0.617218	0.749152	20438000	20440000	AT3G55140	NA	Chr3	20438771	20440429	0.671517	0.788067	11600	interaction358550	3-20442000	+	1497	3-20438000	+	2596	3172	116	0.069862	-444.202616	0	47	0.069862	4700	-139.062106	825	1431	-40.1816	6900	-166	-4.85681507172396	9.22901529933226e-34	0.680702374477606	9.58566074797217e-12
12380000	12382000	AT4G23760	yes	Chr4	12381844	12383034	0.810461	0.784735	12368000	12370000	AT4G23740	NA	Chr4	12366385	12369338	0.783606	0.685192	9500	interaction436429	4-12380000	+	1411	4-12368000	+	2260	12346	95	0.069862	-344.975825	0	34	0.069862	3400	-90.058003	1056	1407	-40.1255	6100	-128	-0.293392137820566	0.0156751033462411	1.17008464250081	2.26327053398585e-28
13940000	13942000	AT2G32860	yes	Chr2	13940186	13943804	3.12515	3.34328	13938000	13940000	AT2G32850	yes	Chr2	13935185	13938845	0.833949	0.82751	10300	interaction221886	2-13940000	+	2340	2-13938000	+	1566	2061	103	0.069862	-381.96978	0	39	0.069862	3900	-108.379998	1145	923	-40.078	6400	-142	5.43132588266453	3.50204992116579e-69	-0.367552356295812	0.0164482436155118
406000	408000	AT2G01900	yes	Chr2	405917	409014	3.22776	2.15591	392000	394000	AT2G01880	yes	Chr2	391422	394032	1.07969	0.960107	3800	interaction153216	2-406000	+	1785	2-392000	+	891	14134	38	0.069862	-104.701531	0	6	0.069862	600	-7.454082	660	403	-40.074	3200	-38	-3.92635496518091	1.10627094655899e-18	-5.84731676758627	3.62555348848976e-22
23048000	23050000	AT3G62280	NA	Chr3	23049422	23051152	0.785313	0.868333	23044000	23046000	AT3G62270	yes	Chr3	23042283	23046048	0.650223	0.670881	7100	interaction371952	3-23048000	+	1262	3-23044000	+	1534	4123	71	0.069862	-237.639459	0	21	0.069862	2100	-46.64315	623	817	-39.9986	5000	-88	-4.26019139950405	4.47630247805929e-29	-4.36960121646189	5.59174839719201e-60
22678000	22680000	AT3G61270	yes	Chr3	22678150	22680379	2.56487	1.98243	22676000	22678000	AT3G61260	NA	Chr3	22675237	22676788	0.753138	0.767831	8000	interaction370346	3-22678000	+	1179	3-22676000	+	1046	1408	80	0.069862	-277.686225	0	26	0.069862	2600	-62.880366	467	479	-39.9799	5400	-104	-5.83984563850522	1.85460330388429e-58	1.01592600133094	0.000154554299110134
750000	752000	AT2G02690	yes	Chr2	749918	751900	1.48984	2.08314	746000	748000	AT2G02680	yes	Chr2	745774	748573	2.3174	2.24656	8900	interaction154718	2-750000	+	1224	2-746000	+	1988	3696	89	0.069862	-317.849502	0	31	0.069862	3100	-79.773104	622	890	-39.9412	5800	-118	-6.81747299013182	3.18635053208157e-16	-3.72501386535379	2.22768505493994e-25
20156000	20158000	AT1G54000	yes	Chr1	20154168	20156419	3.55374	1.45037	20150000	20152000	AT1G53990	yes	Chr1	20151015	20152752	4.02815	2.7653	3500	interaction99555	1-20156000	+	1131	1-20150000	+	1212	5467	35	0.069862	-93.609883	0	5	0.069862	500	-5.628497	392	348	-39.9311	3000	-34	-5.58651785762639	2.25931212151463e-43	-5.66365969115388	5.40753197077067e-47
18482000	18484000	AT3G49830	yes	Chr3	18482382	18483940	1.04441	0.876408	18480000	18482000	AT3G49820	yes	Chr3	18481236	18481722	2.40963	1.26764	17600	interaction348415	3-18482000	+	2483	3-18480000	+	1363	1799	176	0.069862	-750.193497	0	88	0.069862	8800	-315.931106	1249	678	-39.8841	8800	-280	-1.66386055465181	2.20973178787393e-05	-2.13351100493047	2.58267825760433e-06
11488000	11490000	AT4G21610	NA	Chr4	11488975	11490398	0.741529	0.662996	11486000	11488000	AT4G21600	yes	Chr4	11485118	11487416	1.17732	0.792761	14800	interaction431703	4-11488000	+	1683	4-11486000	+	2362	2356	148	0.069862	-602.57273	0	68	0.069862	6800	-225.336343	947	1183	-39.876	8000	-224	-0.681154015815056	0.000114895232192799	-4.63866942195683	1.85451172127965e-28
842000	844000	AT3G03530	yes	Chr3	842498	845043	1.92761	1.36098	840000	842000	AT3G03520	NA	Chr3	837876	840624	0.734302	0.828932	7800	interaction256315	3-842000	+	1619	3-840000	+	989	1854	78	0.069862	-268.950485	0	25	0.069862	2500	-59.558833	777	474	-39.8358	5300	-100	-2.80442606778879	4.83159559118784e-23	-2.66990099990801	2.34366150850149e-14
10184000	10186000	AT4G18430	yes	Chr4	10183716	10185280	1.25354	1.07241	10180000	10182000	AT4G18425	yes	Chr4	10181333	10182140	1.548	1.10234	6700	interaction425371	4-10184000	+	1530	4-10180000	+	1414	3467	67	0.069862	-220.264528	0	19	0.069862	1900	-40.550951	592	614	-39.8232	4800	-82	-5.52495356382313	1.04227940492773e-40	-2.3889550443563	4.47002257418897e-11
2446000	2448000	AT4G04830	yes	Chr4	2445793	2447086	1.92291	1.43298	2442000	2444000	AT4G04810	yes	Chr4	2441326	2442567	1.05442	0.882626	3500	interaction386891	4-2446000	+	978	4-2442000	+	669	3959	35	0.069862	-93.962953	0	5	0.069862	500	-5.626785	525	384	-39.8118	3000	-34	-2.32425709481347	1.70660561701158e-12	-1.62551747732327	4.90321987233263e-06
20446000	20448000	AT3G55160	NA	Chr3	20445411	20452400	0.659661	0.607055	20442000	20444000	AT3G55150	NA	Chr3	20440549	20442604	0.617218	0.749152	10100	interaction358579	3-20446000	+	2531	3-20442000	+	1497	4067	101	0.069862	-372.729694	0	38	0.069862	3800	-104.763272	1663	825	-39.7912	6300	-138	-0.555483585179859	0.0488099497378342	-4.85681507172396	9.22901529933226e-34
8332000	8334000	AT4G14490	NA	Chr4	8332096	8333578	0.720374	0.730174	8330000	8332000	AT4G14480	NA	Chr4	8330080	8331544	0.677133	0.725828	28928.207679	interaction415421	4-8332000	+	2067	4-8330000	+	2906	1803	312	0.075349	-1509.2028	0	176	0.069862	17600	-753.789339	1057	1702	-39.7824	11328.2	-564	0.507843770503438	0.00869260147760134	6.84256399441982	4.24128379499826e-84
16502000	16504000	AT2G39550	yes	Chr2	16501622	16504304	0.928596	0.845136	16498000	16500000	AT2G39530	yes	Chr2	16498485	16499471	4.74935	4.85863	8700	interaction235784	2-16502000	+	3042	2-16498000	+	1121	4286	87	0.069862	-309.025623	0	30	0.069862	3000	-76.473316	1725	490	-39.7804	5700	-114	-0.564106243067392	1.10626558888829e-09	-5.60021769362132	2.98982885329651e-44
18312000	18314000	AT1G49475	yes	Chr1	18312919	18314016	1.41619	0.916334	18310000	18312000	AT1G49470	yes	Chr1	18310493	18311634	3.09095	2.46954	14400	interaction90223	1-18312000	+	1235	1-18310000	+	2047	2024	144	0.069862	-584.6151	0	66	0.069862	6600	-217.888459	640	1070	-39.7508	7800	-218	-2.49528187999021	5.3093142635555e-06	-1.72261692890123	1.03561744371087e-12
7680000	7682000	AT3G21800	yes	Chr3	7680105	7681685	4.31308	4.92246	7678000	7680000	AT3G21790	yes	Chr3	7676926	7678414	1.63277	3.32801	14600	interaction293093	3-7680000	+	2198	3-7678000	+	1481	2391	146	0.069862	-593.306925	0	67	0.069862	6700	-221.715119	1122	740	-39.7244	7900	-222	-5.42158814158839	2.45598181279473e-06	4.85916068924232	2.38902846682004e-84
5588000	5590000	AT3G16450	yes	Chr3	5588393	5590055	3.42818	3.68913	5574000	5576000	AT3G16410	yes	Chr3	5571991	5574541	2.33482	2.54081	3800	interaction281241	3-5588000	+	2604	3-5574000	+	1586	14490	38	0.069862	-104.365991	0	6	0.069862	600	-7.446156	896	581	-39.6927	3200	-38	-3.26200979429494	9.57923125397121e-16	-4.06210710584225	3.8050475675441e-40
24734000	24736000	AT1G66340	NA	Chr1	24734161	24737756	0.824065	0.776322	24732000	24734000	AT1G66330	yes	Chr1	24729628	24732491	0.928641	0.88544	4500	interaction123106	1-24734000	+	1878	1-24732000	+	584	1930	45	0.069862	-131.767359	0	9	0.069862	900	-13.797295	1038	288	-39.6588	3600	-48	-0.306850100403208	0.00724180084996027	2.51672489440242	3.31831918059639e-44
6246000	6248000	AT1G18150	yes	Chr1	6244297	6247812	0.874153	0.793119	6240000	6242000	AT1G18140	yes	Chr1	6238843	6241436	2.19885	1.86525	6900	interaction32847	1-6246000	+	2011	1-6240000	+	1686	5908	69	0.069862	-228.546802	0	20	0.069862	2000	-43.536564	1126	694	-39.6348	4900	-84	-0.320003587285356	0.0117014832252424	-3.57713163911094	1.79707633381656e-09
6682000	6684000	AT1G19330	yes	Chr1	6680562	6683533	0.805718	1.01962	6668000	6670000	AT1G19290	NA	Chr1	6666248	6668963	0.716863	0.608223	3200	interaction34975	1-6682000	+	975	1-6668000	+	3059	14510	32	0.069862	-83.010172	0	4	0.069862	400	-3.969623	570	1953	-39.6175	2800	-30	0.957245692439669	0.000139679167847904	-0.311763612446206	0.0373556488968511
1978000	1980000	AT5G06490	yes	Chr5	1977995	1978589	3.88846	3.44226	1970000	1972000	AT5G06460	NA	Chr5	1970028	1974527	0.68925	0.647982	7300	interaction478455	5-1978000	+	2375	5-1970000	+	1703	7645	73	0.069862	-245.778777	0	22	0.069862	2200	-49.671484	1035	868	-39.5564	5100	-92	-4.52098300573159	5.41026942029334e-09	-0.234930052832286	0.0175621540103042
17498000	17500000	AT1G47603	yes	Chr1	17496838	17498110	2.88918	3.40956	17492000	17494000	AT1G47600	yes	Chr1	17491731	17494759	3.19352	3.81454	8200	interaction85651	1-17498000	+	1619	1-17492000	+	1916	5718	82	0.069862	-285.499008	0	27	0.069862	2700	-65.912648	841	1173	-39.5215	5500	-106	-3.92927835616479	4.46669837208827e-07	-5.95029040241717	9.38975337248742e-17
2696000	2698000	AT1G08520	NA	Chr1	2696411	2700959	0.759531	0.638529	2694000	2696000	AT1G08510	NA	Chr1	2691079	2694377	0.702638	0.743654	11800	interaction14087	1-2696000	+	1242	1-2694000	+	1470	1489	118	0.069862	-454.885525	0	49	0.069862	4900	-147.108544	739	871	-39.4483	6900	-170	3.60859178087015	1.63220550169663e-165	0.410402189913288	1.85157064356082e-06
14856000	14858000	AT2G35270	yes	Chr2	14857020	14857878	4.38539	0.777794	14850000	14852000	AT2G35260	NA	Chr2	14849535	14851969	0.826208	0.792914	6100	interaction227206	2-14856000	+	2388	2-14850000	+	1786	5767	61	0.069862	-194.725864	0	16	0.069862	1600	-31.767609	681	994	-39.4365	4500	-72	-5.6471912348224	7.83901486186913e-34	5.77801405145297	9.99351019790634e-223
18060000	18062000	AT2G43500	NA	Chr2	18061924	18066639	0.762655	0.756783	18058000	18060000	AT2G43490	yes	Chr2	18054391	18058836	0.735686	0.714898	6800	interaction243958	2-18060000	+	727	2-18058000	+	1780	1598	68	0.069862	-226.085462	0	20	0.069862	2000	-43.81481	332	871	-39.4299	4800	-84	1.15730740880064	0.000711334696062141	-0.716702707224493	0.00140610453235605
7392000	7394000	AT3G21090	yes	Chr3	7391437	7395041	1.3981	1.6804	7388000	7390000	AT3G21080	yes	Chr3	7388366	7389974	0.796896	1.01391	11800	interaction291335	3-7392000	+	2778	3-7388000	+	1262	4304	118	0.069862	-454.793	0	49	0.069862	4900	-147.044183	1745	770	-39.4144	6900	-170	1.72939830952	0.000194313586109358	3.89911669925006	1.53848208672576e-07
2332000	2334000	AT1G07570	NA	Chr1	2331169	2333738	0.674009	0.784313	2328000	2330000	AT1G07560	NA	Chr1	2327319	2331096	0.628365	0.649006	9000	interaction12042	1-2332000	+	1040	1-2328000	+	2935	4323	90	0.069862	-323.022887	0	32	0.069862	3200	-83.546349	468	1601	-39.4082	5800	-120	1.95710427557823	7.2639538318541e-43	-5.55188428759143	1.17986910261833e-20
17630000	17632000	AT4G37520	yes	Chr4	17631561	17633249	1.41757	1.12201	17626000	17628000	AT4G37510	yes	Chr4	17626103	17628947	0.749899	0.639453	5200	interaction463709	4-17630000	+	1067	4-17626000	+	1651	3366	52	0.069862	-158.557653	0	12	0.069862	1200	-21.046703	403	951	-39.3934	4000	-58	-1.67732674090445	3.35842274539227e-06	3.3489242266611	1.34871578819006e-186
25866000	25868000	AT5G64700	yes	Chr5	25865171	25866927	3.45466	3.09991	25862000	25864000	AT5G64690	yes	Chr5	25862868	25864778	2.39292	1.63987	4500	interaction599651	5-25866000	+	723	5-25862000	+	924	3562	45	0.069862	-131.440012	0	9	0.069862	900	-13.785816	325	403	-39.3861	3600	-48	-1.1918216441472	4.61777614294759e-09	-2.59869498298039	1.60521688607907e-14
1328000	1330000	AT4G03010	yes	Chr4	1329951	1331139	0.503749	0.787446	1326000	1328000	AT4G03000	NA	Chr4	1324107	1327520	0.637817	0.633428	13300	interaction380797	4-1328000	+	1160	4-1326000	+	1661	2029	133	0.069862	-529.533304	0	59	0.069862	5900	-187.702457	777	888	-39.3756	7400	-198	0.843700423397068	2.78677352990362e-07	0.542088912434155	9.28973309570204e-05
11238000	11240000	AT2G26420	yes	Chr2	11239433	11242239	0.947223	1.14586	11234000	11236000	AT2G26410	yes	Chr2	11234650	11236936	1.44566	1.7633	8700	interaction207798	2-11238000	+	1857	2-11234000	+	1518	4103	87	0.069862	-308.131697	0	30	0.069862	3000	-76.147627	1141	789	-39.3752	5700	-114	-4.92488590371778	2.63272499330981e-25	-5.52542450217513	6.56274203445936e-21
6434000	6436000	AT4G10380	yes	Chr4	6431235	6434822	3.8375	3.01533	6424000	6426000	AT4G10370	yes	Chr4	6423576	6425661	3.26545	3.72237	5200	interaction405678	4-6434000	+	973	4-6424000	+	2676	9915	52	0.069862	-158.677343	0	12	0.069862	1200	-21.043966	411	1343	-39.3525	4000	-58	-3.89751858146327	3.61602618721738e-83	-5.67800047562609	4.24588314896379e-33
7596000	7598000	AT3G21560	yes	Chr3	7595805	7597577	1.11766	1.33319	7592000	7594000	AT3G21550	yes	Chr3	7591482	7592322	2.2317	2.57608	12600	interaction292610	3-7596000	+	2675	3-7592000	+	1492	3314	126	0.069862	-493.050576	0	54	0.069862	5400	-166.969988	1435	845	-39.3173	7200	-184	1.20040619966557	0.00012459064469925	-1.3436073949114	1.45833306785367e-05
21100000	21102000	AT5G51930	yes	Chr5	21101122	21103568	2.23433	1.50339	21098000	21100000	AT5G51920	yes	Chr5	21097105	21098959	1.12065	0.897465	12600	interaction575733	5-21100000	+	1498	5-21098000	+	1849	2175	126	0.069862	-493.028507	0	54	0.069862	5400	-167.434761	665	903	-39.3096	7200	-184	-5.30195612504147	5.98013282685632e-14	-1.76580034690571	3.91180254511679e-11
8312000	8314000	AT4G14455	yes	Chr4	8310335	8312321	0.889029	0.812261	8306000	8308000	AT4G14440	yes	Chr4	8306744	8307753	2.90404	3.12258	5500	interaction415302	4-8312000	+	1954	4-8306000	+	2496	5899	55	0.069862	-170.049182	0	13	0.069862	1300	-23.538215	1116	1121	-39.3031	4200	-62	-0.68485164265565	6.8612714546234e-09	0.808881906657255	0.000316985931734438
27078000	27080000	AT1G71940	yes	Chr1	27078523	27080248	0.793834	0.769276	27076000	27078000	AT1G71930	yes	Chr1	27076139	27077957	3.79084	3.85884	10700	interaction134958	1-27078000	+	1614	1-27076000	+	1475	1950	107	0.069862	-401.108732	0	42	0.069862	4200	-119.762054	830	824	-39.2487	6500	-150	-0.959843481944667	5.07852202570808e-11	-1.02948865929167	2.38867035136694e-05
10128000	10130000	AT1G29030	NA	Chr1	10129034	10133961	0.750799	0.654361	10124000	10126000	AT1G29025	NA	Chr1	10124347	10127068	0.705936	0.938335	15200	interaction52984	1-10128000	+	2000	1-10124000	+	2185	3728	152	0.069862	-621.868072	0	71	0.069862	7100	-237.912787	1110	1198	-39.1913	8100	-232	-0.579993916320732	1.61037475024367e-05	-5.44123955854727	2.33655676946666e-51
1228000	1230000	AT3G04560	yes	Chr3	1227359	1229408	0.812014	0.77643	1218000	1220000	AT3G04520	yes	Chr3	1217238	1219771	3.06592	3.25831	3500	interaction258300	3-1228000	+	2032	3-1218000	+	2182	9451	35	0.069862	-93.386008	0	5	0.069862	500	-5.61741	890	912	-39.1729	3000	-34	-0.697974638954173	1.44429048631608e-09	0.958504669586271	0.0118970606128861
13946000	13948000	AT2G32870	yes	Chr2	13944610	13946790	2.9117	3.6308	13942000	13944000	AT2G32860	yes	Chr2	13940186	13943804	3.12515	3.34328	13400	interaction221930	2-13946000	+	2623	2-13942000	+	1970	3832	134	0.069862	-531.233436	0	59	0.069862	5900	-187.148233	1448	1034	-39.1529	7500	-198	8.48839814309082	2.65906765134821e-123	5.43132588266453	3.50204992116579e-69
26000	28000	AT5G01075	yes	Chr5	26847	27449	1.32813	2.06889	18000	20000	AT5G01050	yes	Chr5	18085	20812	2.42681	2.80078	4800	interaction468327	5-26000	+	1364	5-18000	+	2436	8041	48	0.069862	-142.455944	0	10	0.069862	1000	-16.052267	863	1028	-39.1466	3800	-52	3.74073178145682	1.22985350550381e-56	-5.2686955537035	9.29581257321304e-49
9894000	9896000	AT4G17800	yes	Chr4	9895289	9896668	4.74159	0.864347	9890000	9892000	AT4G17790	yes	Chr4	9891050	9892807	0.926942	0.860493	4500	interaction423918	4-9894000	+	1592	4-9890000	+	931	3871	45	0.069862	-131.135924	0	9	0.069862	900	-13.774558	531	372	-39.1227	3600	-48	-5.11431612049067	4.8090715012348e-32	-0.90356651290358	1.57404154497364e-22
13290000	13292000	AT2G31190	NA	Chr2	13291196	13293794	0.806503	0.702988	13288000	13290000	AT2G31180	yes	Chr2	13286720	13288176	1.65747	1.01115	6800	interaction218474	2-13290000	+	1146	2-13288000	+	957	1805	68	0.069862	-225.310687	0	20	0.069862	2000	-43.738356	563	387	-39.0198	4800	-84	1.37757545153274	3.13929260759988e-16	-3.5829868814963	2.20709718181143e-13
13944000	13946000	AT2G32870	yes	Chr2	13944610	13946790	2.9117	3.6308	13940000	13942000	AT2G32860	yes	Chr2	13940186	13943804	3.12515	3.34328	13700	interaction221911	2-13944000	+	2130	2-13940000	+	2340	4102	137	0.069862	-545.81627	0	61	0.069862	6100	-195.3265	1125	1145	-39.0064	7600	-204	8.48839814309082	2.65906765134821e-123	5.43132588266453	3.50204992116579e-69
1232000	1234000	AT3G04570	yes	Chr3	1230985	1232328	5.08888	0.76369	1228000	1230000	AT3G04560	yes	Chr3	1227359	1229408	0.812014	0.77643	4000	interaction258325	3-1232000	+	1178	3-1228000	+	2032	4097	40	0.069862	-111.932911	0	7	0.069862	700	-9.436608	361	890	-39.0037	3300	-40	-5.44179433445392	1.98755563568019e-40	-0.697974638954173	1.44429048631608e-09
7378000	7380000	AT5G22300	yes	Chr5	7379198	7381935	1.5675	2.67807	7376000	7378000	AT5G22290	yes	Chr5	7375922	7377644	0.757583	0.788757	6200	interaction507178	5-7378000	+	2063	5-7376000	+	816	2161	62	0.069862	-200.153897	0	17	0.069862	1700	-34.730933	1119	432	-38.9773	4500	-74	2.25653641781334	4.54898515693054e-06	0.768713403777967	7.80749297791176e-07
3418000	3420000	AT1G10410	NA	Chr1	3416679	3419639	0.715677	0.792563	3414000	3416000	AT1G10400	yes	Chr1	3414851	3416358	1.96174	1.4529	6600	interaction17890	1-3418000	+	1992	1-3414000	+	976	3266	66	0.069862	-216.699701	0	19	0.069862	1900	-40.649646	952	432	-38.8994	4700	-80	-1.03173935236264	1.82693874771212e-22	-4.32581980368341	2.18032056651522e-10
20026000	20028000	AT1G53645	yes	Chr1	20026146	20028635	0.787388	0.78045	20022000	20024000	AT1G53640	yes	Chr1	20020884	20025461	2.98821	2.26763	12400	interaction99034	1-20026000	+	1913	1-20022000	+	1511	3221	124	0.069862	-483.145932	0	53	0.069862	5300	-163.197644	1102	722	-38.8745	7100	-180	-0.685758873421524	0.00173741970872208	-5.65485838248128	6.14039994721738e-15
18306000	18308000	AT3G49370	NA	Chr3	18304741	18307906	0.69784	0.7382	18302000	18304000	AT3G49360	yes	Chr3	18303045	18304416	1.20557	1.34534	13500	interaction347536	3-18306000	+	1812	3-18302000	+	1863	3842	135	0.069862	-536.623237	0	60	0.069862	6000	-191.50009	1015	927	-38.8426	7500	-200	-1.56445121186258	3.81600147779707e-24	0.449306812964068	0.0112476549973869
19262000	19264000	AT1G51870	yes	Chr1	19262878	19267001	2.15863	3.00905	19260000	19262000	AT1G51860	yes	Chr1	19257633	19261479	1.06514	1.24629	15000	interaction95219	1-19262000	+	1172	1-19260000	+	4026	2041	150	0.069862	-615.855127	0	71	0.069862	7100	-238.810593	798	2316	-38.8411	7900	-230	-4.99840670172262	6.17323042450743e-13	-3.9470916890788	1.17390857614013e-46
5792000	5794000	AT4G09030	yes	Chr4	5792206	5792790	3.69351	1.22459	5786000	5788000	AT4G09020	NA	Chr4	5784073	5789002	0.739768	0.667824	6400	interaction402977	4-5792000	+	909	4-5786000	+	1904	5119	64	0.069862	-208.355235	0	18	0.069862	1800	-37.630917	478	1205	-38.8312	4600	-78	-2.02285355696588	8.42362230510933e-05	0.41162067907668	0.0225313019881896
8482000	8484000	AT4G14770	NA	Chr4	8481369	8484825	0.634092	0.647245	8478000	8480000	AT4G14760	NA	Chr4	8475456	8481094	0.712738	0.629796	13300	interaction416185	4-8482000	+	1458	4-8478000	+	2229	4208	133	0.069862	-527.895179	0	59	0.069862	5900	-187.743672	763	1282	-38.8266	7400	-196	1.33264171457938	1.10481649355608e-08	-0.48040531830255	0.0127950981373167
13302000	13304000	AT4G26270	yes	Chr4	13300794	13304347	0.979705	1.13274	13298000	13300000	AT4G26260	yes	Chr4	13297697	13300387	3.86618	4.1039	8800	interaction441365	4-13302000	+	2491	4-13298000	+	1247	4323	88	0.069862	-313.22769	0	31	0.069862	3100	-79.69152	1278	701	-38.8075	5700	-116	-0.697716584654688	0.00188197514001127	4.27207033987094	5.07665176246076e-06
20362000	20364000	AT3G54960	NA	Chr3	20363309	20366840	0.70427	0.720176	20360000	20362000	AT3G54950	NA	Chr3	20358895	20361233	0.683282	0.726826	3100	interaction358109	3-20362000	+	1616	3-20360000	+	378	2496	31	0.069862	-80.246921	0	4	0.069862	400	-3.980148	847	201	-38.6671	2700	-30	-2.58269043941385	6.64960500827512e-38	-1.84765109328454	3.44476623283775e-25
6320000	6322000	AT3G18400	yes	Chr3	6318744	6320593	3.72697	3.9853	6314000	6316000	AT3G18390	yes	Chr3	6313484	6317971	0.871067	0.7955	9900	interaction285234	3-6320000	+	900	3-6314000	+	3391	5648	99	0.069862	-365.613909	0	38	0.069862	3800	-105.670432	399	2221	-38.661	6100	-136	-4.59314680907742	1.53034940820758e-43	3.48031675797382	1.20334310143867e-83
4060000	4062000	AT5G12860	NA	Chr5	4059685	4061950	0.711116	0.7592	4056000	4058000	AT5G12850	yes	Chr5	4056186	4059580	0.780543	0.846648	17528.294879	interaction489602	5-4060000	+	2778	5-4056000	+	2196	3759	192	0.076525	-830.498873	0	89	0.069862	8900	-318.013413	1424	1166	-38.6544	8628.29	-310	2.33780418921568	9.67343175023538e-46	0.267901963992293	0.0016963655614256
24056000	24058000	AT5G59710	NA	Chr5	24057406	24061918	0.870061	0.75097	24054000	24056000	AT5G59700	NA	Chr5	24052384	24055425	0.621351	0.648476	7200	interaction590630	5-24056000	+	1365	5-24054000	+	1403	2079	72	0.069862	-241.819028	0	22	0.069862	2200	-49.719456	727	737	-38.5979	5000	-90	0.353864251074123	0.000306372031080478	-1.92701581106997	4.53608389437372e-11
18314000	18316000	AT3G49390	NA	Chr3	18314526	18317998	0.811766	0.74061	18312000	18314000	AT3G49380	yes	Chr3	18311908	18313490	1.7197	1.03613	8900	interaction347562	3-18314000	+	909	3-18312000	+	1931	2401	89	0.069862	-319.000404	0	32	0.069862	3200	-83.528801	476	897	-38.5602	5700	-118	-0.739971784463501	4.25522428338222e-19	-3.30600303869112	5.75461487869127e-07
24000000	24002000	AT5G59560	NA	Chr5	24000555	24001957	0.731855	0.701574	23994000	23996000	AT5G59530	NA	Chr5	23994169	23995734	0.755367	0.735283	6200	interaction590327	5-24000000	+	1505	5-23994000	+	1351	5901	62	0.069862	-199.226815	0	17	0.069862	1700	-34.686669	806	511	-38.5143	4500	-74	-0.479326351505094	0.000125186822442885	-5.43814781106637	1.02656703695857e-32
16636000	16638000	AT2G39855	yes	Chr2	16637676	16639308	2.17481	2.33859	16632000	16634000	AT2G39850	yes	Chr2	16630472	16634253	2.20294	2.52253	22202.650435	interaction236470	2-16636000	+	1973	2-16632000	+	2975	3665	234	0.07363	-1061.466802	0	124	0.069862	12400	-485.126307	1101	1713	-38.5073	9802.65	-398	6.30833167203227	6.90851595354897e-10	6.78570065219287	1.41654836591021e-36
7212000	7214000	AT3G20640	yes	Chr3	7210406	7213299	3.60792	2.47504	7208000	7210000	AT3G20630	NA	Chr3	7202772	7208402	0.867835	0.790403	8600	interaction290269	3-7212000	+	1924	3-7208000	+	1257	3506	86	0.069862	-304.118111	0	30	0.069862	3000	-76.32216	931	594	-38.4964	5600	-114	-1.45418088318545	3.70523065539908e-15	-0.302548279571713	0.00113508029086075
12934000	12936000	AT2G30350	NA	Chr2	12934149	12935773	0.816967	0.969799	12930000	12932000	AT2G30340	yes	Chr2	12931218	12932582	2.67545	3.27105	12800	interaction216712	2-12934000	+	2473	2-12930000	+	1482	3511	128	0.069862	-502.961203	0	56	0.069862	5600	-175.362755	1381	752	-38.384	7200	-188	1.01455395808112	5.64383164073799e-06	-5.10923866470595	8.50865581261768e-23
17330000	17332000	AT3G47050	yes	Chr3	17328032	17330889	1.26533	1.56955	17326000	17328000	AT3G47040	yes	Chr3	17324161	17327152	1.20212	1.44806	11100	interaction342345	3-17330000	+	2605	3-17326000	+	1644	3857	111	0.069862	-419.756325	0	45	0.069862	4500	-131.285987	1394	815	-38.293	6600	-156	-6.42585528645665	8.52904847159831e-17	-6.16579962850787	1.73040010608948e-20
104000	106000	AT5G01260	NA	Chr5	105324	107405	0.729025	0.722621	102000	104000	AT5G01250	NA	Chr5	102292	103770	0.797763	0.91444	9600	interaction468676	5-104000	+	1292	5-102000	+	1444	2038	96	0.069862	-349.915603	0	36	0.069862	3600	-97.53886	716	757	-38.2712	6000	-130	1.11358511858002	0.000197644487214671	-5.07445115396185	5.4140766935041e-34
9538000	9540000	AT3G26100	NA	Chr3	9536922	9540453	0.787717	0.811572	9534000	9536000	AT3G26090	NA	Chr3	9532747	9535629	0.716266	0.742555	7000	interaction301967	3-9538000	+	1760	3-9534000	+	1679	3784	70	0.069862	-232.842667	0	21	0.069862	2100	-46.575869	1012	794	-38.2671	4900	-86	-0.902579877720569	1.494924607265e-20	-0.981995413319927	1.2055541076736e-22
26332000	26334000	AT5G65800	yes	Chr5	26330745	26332812	3.32588	2.71389	26322000	26324000	AT5G65790	yes	Chr5	26322947	26324578	2.91124	2.57705	2800	interaction601604	5-26332000	+	1717	5-26322000	+	1587	9575	28	0.069862	-69.077541	0	3	0.069862	300	-2.523921	899	588	-38.2627	2500	-24	-3.74074350200286	1.06857257503397e-12	-5.16566574375695	1.76258839082746e-73
6410000	6412000	AT5G19110	yes	Chr5	6411560	6413170	3.82286	2.97386	6408000	6410000	AT5G19100	yes	Chr5	6408241	6409417	1.58343	1.32423	11800	interaction502163	5-6410000	+	1107	5-6408000	+	2559	2376	118	0.069862	-455.600951	0	50	0.069862	5000	-151.606407	565	1270	-38.253	6800	-170	-3.50906838692962	2.31768615658468e-25	-3.16720978065053	4.1530780272216e-26
9238000	9240000	AT5G26320	yes	Chr5	9238309	9241236	1.69582	1.3441	9234000	9236000	AT5G26310	yes	Chr5	9234684	9236385	3.33159	2.73451	7100	interaction517048	5-9238000	+	839	5-9234000	+	2612	3158	71	0.069862	-238.653328	0	22	0.069862	2200	-49.935001	422	1295	-38.246	4900	-88	-5.71275034115806	3.49188425177572e-13	-6.22968412280895	2.01155909344724e-37
20960000	20962000	AT5G51600	NA	Chr5	20960910	20964484	0.650942	0.686953	20956000	20958000	AT5G51590	yes	Chr5	20956566	20959113	1.63595	0.731464	13246.635654	interaction574983	5-20960000	+	2212	5-20956000	+	2737	4322	144	0.075945	-580.744842	0	59	0.069862	5900	-186.784357	1325	1391	-38.2126	7346.64	-216	0.861196731232615	0.00802435573595934	-1.4434130290965	9.30918856271038e-17
4842000	4844000	AT5G14960	NA	Chr5	4843947	4846394	0.777219	0.765592	4838000	4840000	AT5G14950	yes	Chr5	4837151	4841942	0.788682	0.659935	8400	interaction493587	5-4842000	+	1312	5-4838000	+	3167	3767	84	0.069862	-294.964447	0	29	0.069862	2900	-72.777472	693	1929	-38.1522	5500	-110	0.933093059188846	0.00124619790827461	-0.427925762530604	0.00207954009512182
12048000	12050000	AT2G28260	NA	Chr2	12049988	12052453	0.616403	0.642023	12044000	12046000	AT2G28250	NA	Chr2	12043481	12046537	0.586311	0.676669	9100	interaction211855	2-12048000	+	1515	2-12044000	+	2131	4025	91	0.069862	-326.351928	0	33	0.069862	3300	-86.715684	730	1188	-38.1002	5800	-122	0.663981907710822	0.0189849494862896	-2.6556539712153	2.8491713191348e-43
24988000	24990000	AT5G62220	NA	Chr5	24988455	24990009	0.541612	0.753915	24986000	24988000	AT5G62210	yes	Chr5	24986326	24987489	1.26551	1.1713	11500	interaction595425	5-24988000	+	1250	5-24986000	+	1521	1933	115	0.069862	-440.271703	0	48	0.069862	4800	-143.245295	696	838	-38.0746	6700	-164	0.953870053314312	6.03278426519507e-05	2.13983694909584	0.00341354240551672
11488000	11490000	AT4G21610	NA	Chr4	11488975	11490398	0.741529	0.662996	11480000	11482000	AT4G21590	NA	Chr4	11480343	11482719	0.676729	0.734861	4500	interaction431700	4-11488000	+	1683	4-11480000	+	1980	7579	45	0.069862	-130.669587	0	9	0.069862	900	-13.727627	947	1180	-38.0643	3600	-48	-0.681154015815056	0.000114895232192799	-1.8219653811086	0.000221726077496109
8532000	8534000	AT4G14920	NA	Chr4	8531042	8535842	0.723047	0.64119	8522000	8524000	AT4G14900	NA	Chr4	8521521	8523705	0.638048	0.587879	2800	interaction416442	4-8532000	+	1764	4-8522000	+	1967	10085	28	0.069862	-69.055054	0	3	0.069862	300	-2.52298	1138	1133	-38.0293	2500	-24	0.460235973204979	0.00692875082942754	-0.308519458997166	0.0178454190074613
20886000	20888000	AT3G56320	NA	Chr3	20885893	20889656	0.621861	0.651946	20880000	20882000	AT3G56300	NA	Chr3	20880168	20882366	0.625773	0.643135	8600	interaction360768	3-20886000	+	2486	3-20880000	+	1632	5801	86	0.069862	-303.437341	0	30	0.069862	3000	-76.077883	1367	909	-37.9804	5600	-112	-1.23700672875676	1.46763285400495e-10	1.3892665526	0.00228569901818207
3580000	3582000	AT5G11230	yes	Chr5	3580561	3581617	1.4783	0.695903	3572000	3574000	AT5G11210	yes	Chr5	3571213	3574537	1.61057	1.83456	4506.301659	interaction487005	5-3580000	+	2517	5-3572000	+	2406	7719	49	0.075966	-146.01789	0	9	0.069862	900	-13.723012	1145	1118	-37.9635	3606.3	-54	-3.47622058436331	2.59521283015197e-75	-3.93886281073175	9.24165984980289e-26
12342000	12344000	AT4G23700	yes	Chr4	12342427	12346043	1.52697	1.82672	12336000	12338000	AT4G23680	yes	Chr4	12336185	12337482	4.25071	4.9338	6200	interaction436267	4-12342000	+	3026	4-12336000	+	1684	6280	62	0.069862	-198.951085	0	17	0.069862	1700	-34.614714	1413	729	-37.9624	4500	-74	-4.31436814061529	2.38626455297008e-47	-1.55766364062867	0.0199094978608395
16282000	16284000	AT4G33980	NA	Chr4	16282695	16285059	0.745403	0.713242	16278000	16280000	AT4G33970	NA	Chr4	16279794	16281894	0.482567	0.484764	9200	interaction457314	4-16282000	+	1807	4-16278000	+	1019	3142	92	0.069862	-332.322353	0	34	0.069862	3400	-90.453573	986	598	-37.9581	5800	-124	-1.77005366801313	6.81868314319576e-06	-0.867294462465575	0.0353675691443471
23770000	23772000	AT1G64060	yes	Chr1	23769773	23776931	1.5275	0.964963	23762000	23764000	AT1G64050	NA	Chr1	23762352	23766168	0.776504	0.793667	3700	interaction117858	1-23770000	+	1562	1-23762000	+	1968	7682	37	0.069862	-100.710948	0	6	0.069862	600	-7.448336	518	1038	-37.9122	3100	-36	-2.72481543458543	2.94617730923313e-33	0.373554824959886	0.0288879499324161
3854000	3856000	AT1G11450	yes	Chr1	3853242	3855385	1.87381	1.92523	3850000	3852000	AT1G11440	NA	Chr1	3849359	3850662	0.73726	0.838219	8000	interaction20379	1-3854000	+	2515	1-3850000	+	1038	4064	80	0.069862	-277.710186	0	27	0.069862	2700	-66.207216	1329	484	-37.9094	5300	-104	-2.66036554420138	7.26952516052139e-29	0.418060692601218	0.0136475156321008
19512000	19514000	AT2G47560	yes	Chr2	19511716	19512728	1.62316	1.49287	19508000	19510000	AT2G47550	yes	Chr2	19508979	19511792	3.21373	2.9556	10600	interaction251001	2-19512000	+	1975	2-19508000	+	2157	3662	106	0.069862	-395.382948	0	42	0.069862	4200	-119.597354	989	981	-37.8869	6400	-148	-1.3930704088977	0.00179675886789184	-3.87503918359739	7.42968628456927e-16
10750000	10752000	AT1G30420	NA	Chr1	10748815	10756316	0.555092	0.574199	10746000	10748000	AT1G30410	NA	Chr1	10738804	10747323	0.670725	0.590847	7900	interaction56360	1-10750000	+	1566	1-10746000	+	2159	4052	79	0.069862	-272.230165	0	26	0.069862	2600	-62.543377	950	1262	-37.8695	5300	-102	-2.00562702246781	2.07427282472961e-14	0.855140707877772	0.00415610894190424
7376000	7378000	AT2G16980	yes	Chr2	7376348	7381103	2.6897	1.3135	7374000	7376000	AT2G16970	yes	Chr2	7369548	7375528	2.94965	1.4677	2000	interaction187604	2-7376000	+	847	2-7374000	+	607	1341	20	0.069862	-43.572772	0	1	0.069862	100	-0.457596	340	270	-37.8594	1900	-16	-5.23475397992809	1.82168547859213e-40	-6.11386567987282	1.2698543828817e-31
13936000	13938000	AT5G35770	yes	Chr5	13936085	13940867	4.41332	4.52795	13934000	13936000	AT5G35760	yes	Chr5	13934107	13934782	1.90949	0.724339	10000	interaction540650	5-13936000	+	982	5-13934000	+	1866	1924	100	0.069862	-369.849229	0	39	0.069862	3900	-108.925404	547	1132	-37.8318	6100	-138	-2.95433509568691	9.57570599394753e-08	-1.08166434902794	0.0172336472341377
16282000	16284000	AT4G33980	NA	Chr4	16282695	16285059	0.745403	0.713242	16280000	16282000	AT4G33970	NA	Chr4	16279794	16281894	0.482567	0.484764	23200	interaction457315	4-16282000	+	1807	4-16280000	+	1653	1690	232	0.069862	-1053.167132	0	131	0.069862	13100	-520.913314	986	995	-37.8281	10100	-394	-1.77005366801313	6.81868314319576e-06	-0.867294462465575	0.0353675691443471
1938000	1940000	AT2G05330	yes	Chr2	1938617	1939470	1.321	1.18947	1936000	1938000	AT2G05320	NA	Chr2	1936015	1937464	0.688156	0.608297	9700	interaction160727	2-1938000	+	1218	2-1936000	+	1135	2395	97	0.069862	-355.083347	0	37	0.069862	3700	-101.276814	661	704	-37.8093	6000	-132	-4.29517627645065	1.01241737248187e-10	-1.0941699240697	0.000394631953345688
21034000	21036000	AT5G51780	yes	Chr5	21034822	21036773	4.38886	1.69559	21030000	21032000	AT5G51770	yes	Chr5	21031029	21032994	0.704095	0.804053	4200	interaction575372	5-21034000	+	1217	5-21030000	+	1419	3429	42	0.069862	-119.430711	0	8	0.069862	800	-11.535698	454	691	-37.789	3400	-44	-3.34563693642645	2.7240340283086e-07	-1.02528159000886	8.27567125635597e-10
3992000	3994000	AT5G12340	yes	Chr5	3992947	3993610	4.68717	4.25809	3988000	3990000	AT5G12330	yes	Chr5	3987374	3989833	4.25385	2.35863	10400	interaction489209	5-3992000	+	1623	5-3988000	+	3125	4068	104	0.069862	-386.558377	0	41	0.069862	4100	-116.093038	735	1438	-37.7518	6300	-144	-5.05852201666721	8.42220445781956e-15	-3.10758976250466	5.92725721509833e-08
21132000	21134000	AT5G52040	NA	Chr5	21130319	21133621	0.857055	0.817246	21128000	21130000	AT5G52030	NA	Chr5	21128128	21130090	0.70718	0.625038	9400	interaction575899	5-21132000	+	1603	5-21128000	+	1467	3583	94	0.069862	-340.232467	0	35	0.069862	3500	-93.974834	903	660	-37.7489	5900	-126	0.413671965335503	0.00152239986306527	1.23671459696612	1.97077933855488e-08
5566000	5568000	AT3G16400	yes	Chr3	5566085	5568545	2.21919	1.09908	5562000	5564000	AT3G16390	yes	Chr3	5562570	5564571	3.09517	3.24975	6900	interaction281100	3-5566000	+	1099	3-5562000	+	2540	3782	69	0.069862	-229.295157	0	21	0.069862	2100	-46.804589	412	1060	-37.7215	4800	-84	-1.46013210206601	0.00197838312226521	-3.57997220945164	2.43644009285561e-18
17634000	17636000	AT4G37530	yes	Chr4	17634783	17636288	1.84578	1.57746	17632000	17634000	AT4G37520	yes	Chr4	17631561	17633249	1.41757	1.12201	12400	interaction463730	4-17634000	+	1569	4-17632000	+	1345	1975	124	0.069862	-483.797379	0	54	0.069862	5400	-167.719164	769	589	-37.7204	7000	-180	-1.57687306874445	8.12698727526105e-12	-1.67732674090445	3.35842274539227e-06
13946000	13948000	AT2G32870	yes	Chr2	13944610	13946790	2.9117	3.6308	13940000	13942000	AT2G32860	yes	Chr2	13940186	13943804	3.12515	3.34328	12521.834447	interaction221929	2-13946000	+	2623	2-13940000	+	2340	6135	138	0.076994	-550.399889	0	55	0.069862	5500	-170.580696	1448	1145	-37.675	7021.83	-206	8.48839814309082	2.65906765134821e-123	5.43132588266453	3.50204992116579e-69
3538000	3540000	AT5G11110	yes	Chr5	3536225	3541133	0.650306	0.665345	3534000	3536000	AT5G11100	NA	Chr5	3532401	3535221	0.76611	0.999251	12900	interaction486765	5-3538000	+	3037	5-3534000	+	1709	3935	129	0.069862	-507.13968	0	57	0.069862	5700	-178.999469	1774	970	-37.6739	7200	-190	-1.94961730946098	1.25488448542182e-32	-1.42075903301027	9.05481111206082e-13
4758000	4760000	AT3G14270	NA	Chr3	4753924	4761456	0.694182	0.672313	4748000	4750000	AT3G14260	yes	Chr3	4747768	4748819	3.11178	2.5571	3700	interaction277057	3-4758000	+	1641	3-4748000	+	1705	9667	37	0.069862	-100.691199	0	6	0.069862	600	-7.442273	924	742	-37.6432	3100	-36	-0.485712844397323	1.21925745359522e-08	-6.66423902807324	1.27266069305911e-28
22648000	22650000	AT1G61380	NA	Chr1	22646071	22649521	0.689681	0.638807	22644000	22646000	AT1G61370	NA	Chr1	22642095	22645147	0.672252	0.639721	9900	interaction112019	1-22648000	+	2707	1-22644000	+	1661	4196	99	0.069862	-363.045468	0	38	0.069862	3800	-104.679685	1728	917	-37.6202	6100	-136	1.81414926536058	1.03066136546542e-08	-1.9328851201343	4.39052268633757e-13
6164000	6166000	AT5G18560	yes	Chr5	6164586	6165991	4.40247	5.25445	6160000	6162000	AT5G18550	NA	Chr5	6160177	6163130	0.75528	0.715904	10800	interaction500806	5-6164000	+	2508	5-6160000	+	1110	4098	108	0.069862	-407.207825	0	44	0.069862	4400	-127.824391	1303	606	-37.6114	6400	-152	-4.95090466784806	1.45700379358607e-14	0.900239863021064	1.84710035943736e-12
19456000	19458000	AT3G52490	yes	Chr3	19455698	19458919	3.10217	2.39961	19432000	19434000	AT3G52430	NA	Chr3	19431370	19434403	0.744741	0.810355	2000	interaction353390	3-19456000	+	3190	3-19432000	+	1140	23858	20	0.069862	-43.438283	0	1	0.069862	100	-0.458148	1500	552	-37.5917	1900	-16	-2.20720391305722	9.88396023194296e-17	-1.24612576621366	0.00428410887060968
21008000	21010000	AT1G56145	NA	Chr1	21008092	21014018	0.698307	0.720429	21006000	21008000	AT1G56140	NA	Chr1	21001573	21007809	0.715964	0.725695	7100	interaction104236	1-21008000	+	2205	1-21006000	+	1168	2348	71	0.069862	-237.799914	0	22	0.069862	2200	-49.759734	1267	640	-37.5883	4900	-88	-2.08259800287377	3.20205530932609e-52	-1.67640273497787	5.69278319660604e-38
27686000	27688000	AT1G73640	yes	Chr1	27686991	27688127	0.835868	0.91555	27680000	27682000	AT1G73620	yes	Chr1	27681407	27683130	3.11004	2.52064	3100	interaction138039	1-27686000	+	1009	1-27680000	+	1278	5628	31	0.069862	-79.496789	0	4	0.069862	400	-3.970195	518	617	-37.5785	2700	-28	-1.73659135300621	4.77503004203433e-09	-1.69814933906655	1.06154574362439e-05
6644000	6646000	AT1G19230	yes	Chr1	6644188	6649375	1.3245	0.995207	6628000	6630000	AT1G19220	yes	Chr1	6628067	6633087	0.713826	0.669912	3400	interaction34780	1-6644000	+	1379	1-6628000	+	2116	15978	34	0.069862	-89.938417	0	5	0.069862	500	-5.623029	497	1109	-37.5725	2900	-32	-3.84501302397029	4.03149131651699e-72	-0.392269570208677	0.0370474847083744
18346000	18348000	AT2G44460	yes	Chr2	18346438	18349966	2.024	3.57495	18342000	18344000	AT2G44450	yes	Chr2	18340920	18343849	0.906797	0.71697	6300	interaction245474	2-18346000	+	956	2-18342000	+	1687	3576	63	0.069862	-204.018112	0	18	0.069862	1800	-37.660706	434	777	-37.5415	4500	-76	4.7302142469906	9.40702577162091e-08	-2.51446644647063	1.58371302627513e-50
6616000	6618000	AT2G15240	NA	Chr2	6615524	6618974	0.777274	0.732312	6612000	6614000	AT2G15230	NA	Chr2	6612580	6615395	0.75089	0.776356	9200	interaction183466	2-6616000	+	1636	2-6612000	+	1331	3598	92	0.069862	-331.326106	0	34	0.069862	3400	-90.265919	962	752	-37.5368	5800	-124	-0.427464852034723	0.0215914664317178	-0.636323755401055	0.040604849656529
20922000	20924000	AT5G51510	yes	Chr5	20921432	20922978	0.973778	0.898222	20918000	20920000	AT5G51500	yes	Chr5	20917928	20919838	3.69648	3.97632	7800	interaction574748	5-20922000	+	1143	5-20918000	+	3733	3498	78	0.069862	-268.530719	0	26	0.069862	2600	-62.732588	600	1691	-37.5145	5200	-100	-0.596873438558416	7.69546636255071e-07	-5.67931859543542	6.13098401330105e-14
12244000	12246000	AT4G23460	NA	Chr4	12243670	12248950	0.726717	0.707979	12226000	12228000	AT4G23420	yes	Chr4	12225514	12228718	0.736804	0.760967	1980.732163	interaction435661	4-12244000	+	2686	4-12226000	+	2303	18123	22	0.077596	-49.518509	0	1	0.069862	100	-0.458444	1587	1260	-37.4504	1880.73	-18	-0.258138388713169	0.0173832009782707	-3.36991368094686	1.53148552473681e-23
9230000	9232000	AT1G26700	yes	Chr1	9228234	9232240	1.9261	2.27686	9224000	9226000	AT1G26690	yes	Chr1	9224144	9225775	0.77191	0.951875	3400	interaction48259	1-9230000	+	1030	1-9224000	+	1797	5474	34	0.069862	-90.070929	0	5	0.069862	500	-5.621094	586	1033	-37.4498	2900	-32	-5.30638816221106	9.16576171680799e-27	-0.753996300723479	0.00315471521643277
21258000	21260000	AT1G56710	yes	Chr1	21258007	21259933	0.928813	0.983493	21254000	21256000	AT1G56690	NA	Chr1	21253816	21255931	0.785474	0.752529	9200	interaction105411	1-21258000	+	1801	1-21254000	+	1480	3698	92	0.069862	-331.001839	0	34	0.069862	3400	-90.197044	1072	831	-37.3783	5800	-124	3.64963017545357	7.07784241917683e-05	-0.563988475207897	0.0334421404248989
8562000	8564000	AT4G14980	yes	Chr4	8561875	8563639	1.15919	1.06563	8558000	8560000	AT4G14970	NA	Chr4	8553642	8561664	0.566072	0.587731	19500	interaction416604	4-8562000	+	3295	4-8558000	+	1507	3430	195	0.069862	-850.786425	0	104	0.069862	10400	-388.771953	1839	987	-37.3714	9100	-318	-4.77158731068408	3.91599896919888e-11	0.873576511300773	0.0126144663728256
4904000	4906000	AT5G15130	yes	Chr5	4904346	4907094	3.74454	3.66277	4898000	4900000	AT5G15120	yes	Chr5	4898736	4900581	1.34004	1.09619	6500	interaction493950	5-4904000	+	2573	5-4898000	+	1235	5845	65	0.069862	-211.990194	0	19	0.069862	1900	-40.602419	1179	496	-37.3638	4600	-78	-5.20235252473875	5.82664219121898e-41	-2.81949474523868	0.000134817712277815
29634000	29636000	AT1G78820	yes	Chr1	29634123	29635813	1.35393	2.61151	29632000	29634000	AT1G78815	yes	Chr1	29631742	29632745	4.93719	3.7241	12700	interaction147504	1-29634000	+	2718	1-29632000	+	1643	2179	127	0.069862	-497.468968	0	56	0.069862	5600	-175.138666	1573	843	-37.3173	7100	-186	7.24300282625634	6.03131812808175e-262	-3.36181158396258	1.8973143881887e-17
8148000	8150000	AT5G24100	yes	Chr5	8148615	8151308	1.3874	1.06575	8144000	8146000	AT5G24090	yes	Chr5	8143698	8145252	3.57638	2.71975	5300	interaction511252	5-8148000	+	1587	5-8144000	+	1118	4206	53	0.069862	-162.518658	0	13	0.069862	1300	-23.611499	875	504	-37.2664	4000	-60	-5.81338017567678	1.48696506333698e-61	-5.03773647723474	4.2240022199502e-40
26706000	26708000	AT5G66870	yes	Chr5	26705861	26708676	4.53807	4.12075	26698000	26700000	AT5G66850	NA	Chr5	26695606	26699324	0.695741	0.698935	4200	interaction603507	5-26706000	+	2324	5-26698000	+	1741	8281	42	0.069862	-119.223601	0	8	0.069862	800	-11.514627	991	815	-37.2349	3400	-44	-4.69856356987939	7.8197586163864e-69	0.366944254628319	0.000245216915941306
16906000	16908000	AT2G40475	yes	Chr2	16906910	16908128	3.71038	4.45405	16902000	16904000	AT2G40470	yes	Chr2	16902303	16903652	3.76877	3.71216	12400	interaction237808	2-16906000	+	1785	2-16902000	+	2170	3837	124	0.069862	-482.342338	0	54	0.069862	5400	-166.644852	1045	1379	-37.2251	7000	-180	1.35421521440385	1.5430765525009e-25	-2.94977437982599	3.55781894884618e-18
10932000	10934000	AT4G20240	yes	Chr4	10931492	10934212	3.07207	3.28227	10926000	10928000	AT4G20230	yes	Chr4	10924120	10926758	2.62847	2.09809	5700	interaction429201	4-10932000	+	1146	4-10926000	+	2069	6322	57	0.069862	-178.746135	0	15	0.069862	1500	-29.026466	483	1062	-37.2185	4200	-66	-3.87188659301793	8.99156402713661e-73	-2.60830014662362	1.37775781618707e-21
4486000	4488000	AT5G13920	NA	Chr5	4485930	4487433	0.77103	0.709787	4482000	4484000	AT5G13910	yes	Chr5	4482449	4483085	2.37873	1.8539	16800	interaction491834	5-4486000	+	1913	5-4482000	+	2385	3850	168	0.069862	-704.771269	0	84	0.069862	8400	-295.98723	955	1160	-37.1686	8400	-264	1.5923962596333	7.12510838649291e-12	-5.06490278725005	2.83614373486705e-52
4070000	4072000	AT1G12040	yes	Chr1	4070123	4072567	0.679292	0.705253	4066000	4068000	AT1G12030	yes	Chr1	4064666	4066341	3.9886	4.96998	14600	interaction21549	1-4070000	+	2260	1-4066000	+	1607	3497	146	0.069862	-592.716223	0	69	0.069862	6900	-229.927306	1286	852	-37.1221	7700	-222	-5.94266582783287	8.40601885922316e-54	5.19073746436393	1.98521913915872e-26
16190000	16192000	AT2G38720	NA	Chr2	16188046	16192266	0.579241	0.605922	16186000	16188000	AT2G38710	NA	Chr2	16184368	16187173	0.817246	0.809255	7600	interaction234098	2-16190000	+	1972	2-16186000	+	1303	4349	76	0.069862	-259.381632	0	25	0.069862	2500	-59.422817	1222	612	-37.1189	5100	-96	2.01762095736155	2.0562815537286e-10	-0.636233028683764	1.03893107809079e-08
12062000	12064000	AT4G23010	NA	Chr4	12060130	12062858	0.767425	0.867645	12056000	12058000	AT4G23000	NA	Chr4	12054454	12060028	0.607593	0.60245	3600	interaction434478	4-12062000	+	497	4-12056000	+	2386	5641	36	0.069862	-97.921685	0	6	0.069862	600	-7.472886	234	1711	-37.1152	3000	-36	-0.416531945720744	4.20321185424695e-05	1.41826841839419	1.06641261517223e-05
17200000	17202000	AT3G46700	yes	Chr3	17200300	17201889	1.29573	1.34778	17198000	17200000	AT3G46690	NA	Chr3	17197625	17199337	0.630507	0.746719	11100	interaction341520	3-17200000	+	1362	3-17198000	+	1414	1923	111	0.069862	-420.551675	0	46	0.069862	4600	-135.436352	674	722	-37.0914	6500	-156	-4.7857170368929	2.2817437805512e-12	-2.46994578411773	4.1335602715291e-11
24500000	24502000	AT1G65860	yes	Chr1	24499065	24502745	3.02125	3.30173	24494000	24496000	AT1G65850	yes	Chr1	24494677	24498542	2.76792	3.11791	8000	interaction121889	1-24500000	+	1414	1-24494000	+	1771	5322	80	0.069862	-276.883055	0	27	0.069862	2700	-65.887123	899	973	-37.0773	5300	-102	4.40193922467497	6.14080108865976e-123	-3.47513727859896	2.95833870147107e-08
2576000	2578000	AT3G08500	yes	Chr3	2576793	2578246	3.81669	4.21808	2574000	2576000	AT3G08490	yes	Chr3	2573943	2575215	3.59947	3.63096	18100	interaction265025	3-2576000	+	2779	3-2574000	+	1544	2483	181	0.069862	-775.312315	0	94	0.069862	9400	-342.68321	1596	820	-37.0191	8700	-290	-0.766167840596328	0.0384741908687929	-2.59916037261392	1.86483425430449e-12
8228000	8230000	AT1G23200	yes	Chr1	8227177	8229582	3.84483	4.47585	8222000	8224000	AT1G23190	NA	Chr1	8219868	8224469	0.93655	0.780342	12104.576425	interaction42993	1-8228000	+	2694	1-8222000	+	2169	5939	127	0.073299	-496.250404	0	52	0.069862	5200	-158.346853	1448	1287	-37.0047	6904.58	-186	3.5559290309891	4.02485355126653e-36	-0.479033662680142	1.70778475880187e-06
4056000	4058000	AT1G12010	yes	Chr1	4056206	4057933	2.29137	1.95998	4052000	4054000	AT1G12000	NA	Chr1	4049895	4053835	0.753759	0.715136	10965.13557	interaction21489	1-4056000	+	2331	1-4052000	+	2484	3671	114	0.072633	-432.966547	0	45	0.069862	4500	-130.912016	1184	1326	-36.9964	6465.14	-162	-3.12335591255586	3.46292274339396e-46	-1.03588816773024	1.28771310016553e-07
20768000	20770000	AT1G55590	yes	Chr1	20769319	20771871	0.993681	1.00442	20764000	20766000	AT1G55580	yes	Chr1	20764010	20765752	4.96175	5.00818	7000	interaction102917	1-20768000	+	849	1-20764000	+	2932	4196	70	0.069862	-234.269597	0	22	0.069862	2200	-49.936232	421	1079	-36.9931	4800	-86	-0.282475082765143	0.00359529682176637	-3.65585650561721	7.77288849411175e-21
9422000	9424000	AT3G25800	NA	Chr3	9422587	9426044	0.891713	0.776425	9414000	9416000	AT3G25790	yes	Chr3	9413126	9415003	3.92759	2.54902	3900	interaction301574	3-9422000	+	1636	3-9414000	+	1267	8076	39	0.069862	-108.16769	0	7	0.069862	700	-9.42793	826	452	-36.9039	3200	-40	-0.36688107046208	0.00540516122317617	-4.10260274073625	6.36464057168575e-31
3702000	3704000	AT5G11540	yes	Chr5	3703001	3704981	4.43865	4.9693	3700000	3702000	AT5G11530	yes	Chr5	3695861	3701548	2.50162	2.59836	14100	interaction487665	5-3702000	+	2725	5-3700000	+	1426	2035	141	0.069862	-568.224805	0	66	0.069862	6600	-217.236085	1425	788	-36.8644	7500	-212	-2.96172344585519	2.25871611550645e-07	0.341802489272609	0.00647053452485866
3596000	3598000	AT3G11430	yes	Chr3	3595764	3597952	4.3963	3.9792	3592000	3594000	AT3G11420	yes	Chr3	3591474	3594570	1.00205	0.872064	18141.284364	interaction270938	3-3596000	+	3321	3-3592000	+	1969	3554	213	0.082027	-945.346134	0	96	0.069862	9600	-351.160529	1452	965	-36.8547	8541.28	-354	-5.20830567007874	6.89970321147247e-35	-1.60233927034004	2.28202315927273e-12
5578000	5580000	AT1G16310	yes	Chr1	5578430	5580693	0.897845	0.938485	5576000	5578000	AT1G16300	NA	Chr1	5574309	5577622	0.757107	0.739902	12200	interaction29223	1-5578000	+	1869	1-5576000	+	1771	2025	122	0.069862	-472.602393	0	53	0.069862	5300	-162.886595	991	861	-36.8224	6900	-176	-1.93326806622156	2.01648822361325e-21	-1.83896007727843	9.80412143654384e-18
19360000	19362000	AT1G52060	yes	Chr1	19359038	19360675	2.82316	3.36325	19354000	19356000	AT1G52050	yes	Chr1	19354918	19356764	3.08597	3.54472	6900	interaction95864	1-19360000	+	1409	1-19354000	+	1929	5921	69	0.069862	-228.820897	0	21	0.069862	2100	-46.54289	918	1261	-36.8061	4800	-84	-5.14933175018769	2.39862909990523e-13	-5.2397057101088	1.08553216977369e-22
10730000	10732000	AT4G19720	yes	Chr4	10730362	10731750	3.42336	2.50374	10726000	10728000	AT4G19710	yes	Chr4	10724854	10729768	0.905931	0.789882	10800	interaction427898	4-10730000	+	1855	4-10726000	+	2050	3755	108	0.069862	-405.0411	0	44	0.069862	4400	-127.428813	812	1249	-36.8012	6400	-150	-5.7627611558776	8.5463899699399e-27	1.04694139692685	6.06793012313739e-08
1236000	1238000	AT3G04580	NA	Chr3	1235282	1238493	0.812896	0.726861	1232000	1234000	AT3G04570	yes	Chr3	1230985	1232328	5.08888	0.76369	7200	interaction258344	3-1236000	+	2318	3-1232000	+	1178	4200	72	0.069862	-242.119775	0	23	0.069862	2300	-53.22029	985	361	-36.7851	4900	-90	-0.845093643908103	5.01691783417544e-25	-5.44179433445392	1.98755563568019e-40
10186000	10188000	AT4G18440	NA	Chr4	10186130	10188909	0.68499	0.698433	10180000	10182000	AT4G18425	yes	Chr4	10181333	10182140	1.548	1.10234	4400	interaction425378	4-10186000	+	1334	4-10180000	+	1414	6060	44	0.069862	-126.979903	0	9	0.069862	900	-13.744033	773	614	-36.7768	3500	-46	1.35581051278423	6.57152976063643e-06	-2.3889550443563	4.47002257418897e-11
17002000	17004000	AT5G42520	NA	Chr5	17000258	17002607	0.766773	0.750508	16998000	17000000	AT5G42510	yes	Chr5	16998267	16998816	1.29842	1.78514	10800	interaction554920	5-17002000	+	1930	5-16998000	+	1961	3626	108	0.069862	-404.9175	0	44	0.069862	4400	-127.29453	1064	919	-36.7555	6400	-150	0.292092822401884	0.00334518982448729	-5.96482630037052	2.49728103957208e-23
30374000	30376000	AT1G80830	NA	Chr1	30372878	30375696	0.676408	0.66211	30370000	30372000	AT1G80820	yes	Chr1	30370571	30372670	1.79594	1.729	10300	interaction151401	1-30374000	+	1678	1-30370000	+	1928	3839	103	0.069862	-381.7403	0	41	0.069862	4100	-116.030721	779	936	-36.7348	6200	-142	-3.55150600986124	3.01489082365893e-63	-3.46807589803782	7.84468261667058e-27
490000	492000	AT4G01140	yes	Chr4	490748	492199	1.84956	1.33625	488000	490000	AT4G01130	yes	Chr4	485832	488007	1.11941	1.2376	15200	interaction376542	4-490000	+	1634	4-488000	+	1281	1750	152	0.069862	-625.271461	0	74	0.069862	7400	-252.323002	877	724	-36.7188	7800	-234	-3.81478699234882	1.95107148294798e-15	7.13047918766669	3.99401695322423e-102
12510000	12512000	AT4G24080	yes	Chr4	12511357	12512290	1.08612	0.99618	12504000	12506000	AT4G24060	yes	Chr4	12503781	12505646	4.61577	2.27074	7400	interaction437011	4-12510000	+	1384	4-12504000	+	2432	6338	74	0.069862	-250.494165	0	24	0.069862	2400	-56.115899	690	1142	-36.7088	5000	-92	-1.99275880903086	1.18576318641101e-10	-0.783742420993512	7.51901988046867e-18
968000	970000	AT1G03840	yes	Chr1	967502	970130	4.44696	3.98912	960000	962000	AT1G03820	yes	Chr1	959868	960728	2.14414	1.99311	5100	interaction4551	1-968000	+	2625	1-960000	+	1879	8082	51	0.069862	-154.048535	0	12	0.069862	1200	-20.962007	1037	1024	-36.6749	3900	-56	-4.37555066463502	2.39555274220716e-50	-1.84755412296188	9.7063082851621e-07
242000	244000	AT2G01540	NA	Chr2	242122	243493	0.764543	0.726713	238000	240000	AT2G01530	yes	Chr2	239704	240520	2.35306	2.58191	6800	interaction152448	2-242000	+	946	2-238000	+	1899	3527	68	0.069862	-225.33894	0	21	0.069862	2100	-46.789924	425	951	-36.6567	4700	-84	-1.40977885198434	4.2374914837201e-06	-5.87797315043041	4.19702946416447e-27
11030000	11032000	AT4G20460	NA	Chr4	11029735	11032677	0.711576	0.768076	11026000	11028000	AT4G20450	yes	Chr4	11024053	11029008	1.17822	1.39759	15900	interaction429660	4-11030000	+	2076	4-11026000	+	2084	3943	159	0.069862	-657.53825	0	78	0.069862	7800	-268.464311	1266	1172	-36.6533	8100	-246	-3.4494870255077	6.7788664500463e-68	-2.66529006748566	4.74303812005268e-08
20342000	20344000	AT1G54460	NA	Chr1	20340599	20343530	0.870623	0.828409	20338000	20340000	AT1G54450	yes	Chr1	20336339	20339535	1.2216	1.44307	10600	interaction100417	1-20342000	+	1556	1-20338000	+	2176	3451	106	0.069862	-396.159578	0	43	0.069862	4300	-123.521153	867	1146	-36.638	6300	-148	-0.269218207538033	0.0262178520867089	-1.11861487791965	5.19405699296916e-05
18392000	18394000	AT5G45380	yes	Chr5	18391123	18395894	1.82686	1.96174	18388000	18390000	AT5G45370	NA	Chr5	18388290	18390420	0.672235	0.713134	3000	interaction561925	5-18392000	+	320	5-18388000	+	1547	4705	30	0.069862	-76.939358	0	4	0.069862	400	-3.981005	191	782	-36.6011	2600	-28	-2.63682998530295	7.01140964019606e-82	-0.588268388643929	2.19988278504737e-05
1368000	1370000	AT5G04740	NA	Chr5	1368541	1371480	0.831345	0.746153	1362000	1364000	AT5G04720	yes	Chr5	1360711	1363884	0.895849	1.0815	6100	interaction475128	5-1368000	+	1931	5-1362000	+	1499	6282	61	0.069862	-194.920651	0	17	0.069862	1700	-34.603733	792	780	-36.5275	4400	-72	-0.978948751407189	3.63779210856145e-18	-0.394924849172553	0.026098143052152
6264000	6266000	AT5G18780	NA	Chr5	6264269	6266174	0.666644	0.73066	6262000	6264000	AT5G18770	NA	Chr5	6261351	6263436	0.679125	0.622023	14400	interaction501345	5-6264000	+	1764	5-6262000	+	1976	2161	144	0.069862	-581.971586	0	68	0.069862	6800	-225.359914	938	1096	-36.502	7600	-218	-2.60223105394139	2.38526127011523e-26	0.517432523042186	0.000788489880900868
8258000	8260000	AT3G23160	NA	Chr3	8259854	8262028	0.783638	0.696943	8256000	8258000	AT3G23150	yes	Chr3	8254662	8257735	0.769007	0.724599	10600	interaction295842	3-8258000	+	790	3-8256000	+	2450	2199	106	0.069862	-399.814885	0	44	0.069862	4400	-128.631927	402	1378	-36.4998	6200	-148	-1.24094448403294	2.21951658935454e-24	-2.01034639598084	3.14953897849774e-05
13302000	13304000	AT4G26270	yes	Chr4	13300794	13304347	0.979705	1.13274	13294000	13296000	AT4G26255	yes	Chr4	13293940	13296465	1.97436	1.87592	6300	interaction441363	4-13302000	+	2491	4-13294000	+	1801	7677	63	0.069862	-203.05657	0	18	0.069862	1800	-37.495964	1278	890	-36.4421	4500	-76	-0.697716584654688	0.00188197514001127	5.12051923588405	9.94427012017771e-12
7450000	7452000	AT3G21230	yes	Chr3	7448039	7452000	1.07866	0.87314	7446000	7448000	AT3G21220	NA	Chr3	7445756	7447351	0.988257	0.792036	8600	interaction291675	3-7450000	+	2263	3-7446000	+	1552	4371	86	0.069862	-303.554423	0	31	0.069862	3100	-79.62087	1169	788	-36.3771	5500	-112	-1.88253389402041	3.76207980676136e-21	-0.281910419334868	0.00113689938212511
1848000	1850000	AT1G06090	yes	Chr1	1847882	1849693	2.81705	2.95794	1844000	1846000	AT1G06080	yes	Chr1	1843567	1846302	2.53262	3.17526	7700	interaction9333	1-1848000	+	1212	1-1844000	+	1451	3697	77	0.069862	-263.956361	0	26	0.069862	2600	-62.721637	613	799	-36.2965	5100	-98	-3.74301305200293	1.32926685009827e-35	1.26520322426241	0.0013777958403154
9634000	9636000	AT1G27680	yes	Chr1	9631284	9634597	0.704831	0.630539	9624000	9626000	AT1G27660	yes	Chr1	9621569	9626004	3.81201	2.98552	5700	interaction50442	1-9634000	+	1913	1-9624000	+	2307	9362	57	0.069862	-178.192062	0	15	0.069862	1500	-28.931485	953	1227	-36.2932	4200	-66	0.914653660907488	3.29408175554065e-05	-0.573323437984951	2.63718259313914e-05
11712000	11714000	AT4G22110	yes	Chr4	11711313	11714228	3.18679	2.68844	11702000	11704000	AT4G22080	yes	Chr4	11700554	11702666	3.44144	3.9429	5907.815165	interaction432865	4-11712000	+	1928	4-11702000	+	3276	10313	67	0.07923	-219.848334	0	16	0.069862	1600	-31.724192	941	1720	-36.2852	4307.82	-82	-4.53091259632729	2.45102849241835e-10	-5.80722278362447	5.47366843625422e-28
8388000	8390000	AT3G23430	yes	Chr3	8387507	8393296	1.75679	1.21611	8384000	8386000	AT3G23410	NA	Chr3	8382804	8386148	0.676038	0.700239	23100	interaction296388	3-8388000	+	2206	3-8384000	+	2419	3559	231	0.069862	-1043.215586	0	131	0.069862	13100	-519.266774	1199	1630	-36.2729	10000	-390	-3.75840632366406	5.00861466442379e-78	2.82234780774041	4.2508862878758e-102
10020000	10022000	AT2G23530	yes	Chr2	10020651	10022864	0.816423	0.689696	10016000	10018000	AT2G23520	NA	Chr2	10013990	10016943	0.877508	0.762567	5900	interaction201498	2-10020000	+	2228	2-10016000	+	1750	4638	59	0.069862	-186.472945	0	16	0.069862	1600	-31.715104	1287	1023	-36.2065	4300	-68	-0.906404115724663	0.000236450283087264	0.222138657063457	0.030530085553899
7296000	7298000	AT4G12270	yes	Chr4	7297807	7299930	2.32509	2.08926	7290000	7292000	AT4G12250	NA	Chr4	7289191	7290902	0.704752	0.735884	4800	interaction410248	4-7296000	+	1146	4-7290000	+	1804	6545	48	0.069862	-142.610882	0	11	0.069862	1100	-18.507297	501	866	-36.1714	3700	-52	-4.74403910555384	6.11321519098426e-14	-0.650448468850592	0.0263176948445464
23048000	23050000	AT3G62280	NA	Chr3	23049422	23051152	0.785313	0.868333	23046000	23048000	AT3G62270	yes	Chr3	23042283	23046048	0.650223	0.670881	7500	interaction371953	3-23048000	+	1262	3-23046000	+	1103	2242	75	0.069862	-255.384983	0	25	0.069862	2500	-59.546321	623	484	-36.1478	5000	-94	-4.26019139950405	4.47630247805929e-29	-4.36960121646189	5.59174839719201e-60
10112000	10114000	AT1G29000	yes	Chr1	10113017	10114340	3.30121	3.53124	10110000	10112000	AT1G28960	yes	Chr1	10109499	10111660	0.857594	0.85135	9600	interaction52874	1-10112000	+	2391	1-10110000	+	1875	2044	96	0.069862	-348.793001	0	37	0.069862	3700	-100.97532	1275	952	-36.1346	5900	-130	-4.30952270136532	4.97048630202913e-16	-0.401687174923549	0.0435338517766776
19270000	19272000	AT1G51880	yes	Chr1	19270192	19274068	2.15673	2.95586	19260000	19262000	AT1G51860	yes	Chr1	19257633	19261479	1.06514	1.24629	5695.65104	interaction95276	1-19270000	+	1773	1-19260000	+	4026	10088	73	0.089541	-245.71776	0	15	0.069862	1500	-28.911468	1201	2316	-36.104	4195.65	-92	-5.75359007630767	8.00641733934526e-38	-3.9470916890788	1.17390857614013e-46
6106000	6108000	AT1G17750	NA	Chr1	6106655	6110120	0.561243	0.610548	6102000	6104000	AT1G17745	yes	Chr1	6100963	6105265	0.803968	0.769576	7500	interaction32170	1-6106000	+	2012	1-6102000	+	1152	3438	75	0.069862	-255.275846	0	25	0.069862	2500	-59.527361	1094	500	-36.0965	5000	-94	-2.40974650685929	5.26010537977674e-09	-3.40756553215301	3.27073813956747e-21
29788000	29790000	AT1G79190	NA	Chr1	29788638	29794175	0.647099	0.64242	29786000	29788000	AT1G79180	yes	Chr1	29786494	29787802	0.920656	0.833999	13300	interaction148325	1-29788000	+	2090	1-29786000	+	1632	1982	133	0.069862	-527.223531	0	61	0.069862	6100	-196.083728	1187	771	-36.0561	7200	-196	-0.284076822224647	0.0161980673826753	-3.29162876553921	4.21896504665696e-15
418000	420000	AT3G02240	yes	Chr3	418458	419164	3.58924	2.72789	414000	416000	AT3G02230	yes	Chr3	415392	417547	0.813545	0.711384	6800	interaction254218	3-418000	+	1570	3-414000	+	1537	3813	68	0.069862	-224.40285	0	21	0.069862	2100	-46.616921	699	680	-36.0102	4700	-84	-3.43647661582699	3.12226504975319e-26	-2.05963738292753	9.47748389009782e-66
22178000	22180000	AT1G60140	NA	Chr1	22176933	22180875	0.829266	0.798303	22174000	22176000	AT1G60130	yes	Chr1	22174178	22176321	1.63314	2.00596	13000	interaction109400	1-22178000	+	1784	1-22174000	+	2296	3607	130	0.069862	-511.871264	0	59	0.069862	5900	-187.280475	958	1239	-35.888	7100	-190	-0.604394672003711	0.0132411930419759	-1.50090597756097	0.0010997808643923
2848000	2850000	AT3G09270	yes	Chr3	2848288	2849289	2.71156	0.891979	2836000	2838000	AT3G09240	NA	Chr3	2835667	2837956	0.528513	0.639672	3300	interaction266567	3-2848000	+	1179	3-2836000	+	3844	11601	33	0.069862	-86.449895	0	5	0.069862	500	-5.627411	370	1760	-35.8846	2800	-32	-4.29386705794604	8.52294106508384e-86	-4.39271775997935	5.87859471068773e-27
5558000	5560000	AT5G16900	yes	Chr5	5555253	5559715	1.15148	1.15488	5552000	5554000	AT5G16890	NA	Chr5	5551628	5554917	0.781708	0.795229	12394.820048	interaction497385	5-5558000	+	2681	5-5552000	+	2162	6310	129	0.07271	-506.095253	0	55	0.069862	5500	-170.541307	1253	1181	-35.8286	6894.82	-188	-5.96416407147617	2.92687046499549e-32	-0.273670426275876	0.019418091822464
26330000	26332000	AT5G65800	yes	Chr5	26330745	26332812	3.32588	2.71389	26324000	26326000	AT5G65790	yes	Chr5	26322947	26324578	2.91124	2.57705	5000	interaction601594	5-26330000	+	1925	5-26324000	+	1548	6710	50	0.069862	-150.226534	0	12	0.069862	1200	-21.007946	910	557	-35.7932	3800	-56	-3.74074350200286	1.06857257503397e-12	-5.16566574375695	1.76258839082746e-73
21932000	21934000	AT5G54050	yes	Chr5	21933622	21935995	1.52433	1.73521	21926000	21928000	AT5G54030	yes	Chr5	21925983	21927243	1.49888	1.85952	6800	interaction579934	5-21932000	+	1533	5-21926000	+	2363	6062	68	0.069862	-224.406721	0	21	0.069862	2100	-46.578988	784	1176	-35.7844	4700	-84	-5.60893544566925	8.33763914908416e-11	-5.40249749672936	8.84079868946656e-15
16828000	16830000	AT4G35390	yes	Chr4	16829325	16830692	3.59242	1.78552	16818000	16820000	AT4G35380	NA	Chr4	16819882	16826061	0.576133	0.639635	3600	interaction459916	4-16828000	+	2093	4-16818000	+	1992	10202	36	0.069862	-96.993139	0	6	0.069862	600	-7.441051	813	1067	-35.7559	3000	-36	-4.28802870254628	1.81072416419395e-50	-4.78979879113048	3.28501968304002e-89
7214000	7216000	AT4G12040	NA	Chr4	7214702	7215989	0.830495	0.886708	7206000	7208000	AT4G12020	NA	Chr4	7201655	7209648	0.645833	0.618323	2300	interaction409858	4-7214000	+	685	4-7206000	+	2769	8219	23	0.069862	-52.90617	0	2	0.069862	200	-1.330894	331	1732	-35.7233	2100	-18	-0.783311163144108	0.00137796042905566	-0.628552355079074	1.6678744946781e-08
7086000	7088000	AT5G20890	NA	Chr5	7086652	7090081	0.832983	0.775589	7084000	7086000	AT5G20885	NA	Chr5	7083964	7084734	0.683485	0.850444	6900	interaction505803	5-7086000	+	1659	5-7084000	+	884	2127	69	0.069862	-229.824925	0	22	0.069862	2200	-49.889216	842	463	-35.7183	4700	-86	-0.452163902578324	3.93172861599928e-05	-1.11360355011831	3.7366451008067e-07
18246000	18248000	AT1G49320	yes	Chr1	18246304	18247992	3.217	2.17724	18238000	18240000	AT1G49310	yes	Chr1	18237862	18238367	4.32886	2.70417	5200	interaction89821	1-18246000	+	1686	1-18238000	+	1379	8221	52	0.069862	-158.278912	0	13	0.069862	1300	-23.604911	846	530	-35.717	3900	-58	-1.72134774850264	2.3910689907533e-08	-4.8052262336098	3.56377233702888e-34
7126000	7128000	AT5G20980	NA	Chr5	7122799	7128359	0.654643	0.610202	7120000	7122000	AT5G20960	NA	Chr5	7116737	7122774	0.668474	0.650694	14580.885818	interaction506005	5-7126000	+	2250	5-7120000	+	2835	5643	167	0.080016	-698.422144	0	70	0.069862	7000	-233.229893	1324	1576	-35.6391	7580.89	-260	0.722928821421496	6.8438775162806e-05	-3.29900124615336	4.89488548115101e-82
8718000	8720000	AT4G15280	yes	Chr4	8719181	8720618	4.00518	4.35943	8716000	8718000	AT4G15270	yes	Chr4	8716600	8717796	3.53459	3.93868	20845.27916	interaction417467	4-8718000	+	2574	4-8716000	+	2460	2054	237	0.07943	-1075.234804	0	116	0.069862	11600	-444.498819	1425	1407	-35.6097	9245.28	-402	-2.99188020341154	2.81384028408845e-07	-5.16432884564781	1.30028186386445e-20
9352000	9354000	AT1G26945	yes	Chr1	9351453	9352761	2.87988	4.14969	9342000	9344000	AT1G26940	NA	Chr1	9343125	9345145	0.815754	0.763922	3300	interaction48923	1-9352000	+	1076	1-9342000	+	1688	9228	33	0.069862	-86.491045	0	5	0.069862	500	-5.622441	521	951	-35.5892	2800	-32	2.16822786546275	3.89198019037348e-25	-0.813955801071185	5.60026010080776e-07
17692000	17694000	AT4G37650	yes	Chr4	17691785	17693760	4.2242	2.81085	17686000	17688000	AT4G37640	NA	Chr4	17682976	17686941	0.675956	0.653065	5400	interaction463955	4-17692000	+	3070	4-17686000	+	1051	6115	54	0.069862	-166.637045	0	14	0.069862	1400	-26.262375	1516	566	-35.5496	4000	-62	-0.957016499505467	1.59010615675548e-05	-0.893682489717508	2.21729281381781e-16
19528000	19530000	AT1G52420	NA	Chr1	19527841	19531287	0.698989	0.730505	19524000	19526000	AT1G52410	yes	Chr1	19520727	19525624	0.855769	0.840897	5200	interaction96700	1-19528000	+	2000	1-19524000	+	1168	4120	52	0.069862	-158.450861	0	13	0.069862	1300	-23.587293	1098	615	-35.5143	3900	-58	-0.917886937840365	4.06257829833723e-15	3.16271066847039	3.07823854249589e-06
16304000	16306000	AT2G39050	yes	Chr2	16303402	16305629	0.804816	0.962513	16300000	16302000	AT2G39040	yes	Chr2	16299350	16301227	4.29105	4.7764	3000	interaction234734	2-16304000	+	1546	2-16300000	+	1115	4270	30	0.069862	-75.9935	0	4	0.069862	400	-3.970123	731	524	-35.5019	2600	-28	-2.22985326512304	1.44696188786771e-05	-5.94043000427423	1.70032979189805e-37
5562000	5564000	AT3G16390	yes	Chr3	5562570	5564571	3.09517	3.24975	5556000	5558000	AT3G16370	yes	Chr3	5556709	5558589	1.04676	1.13635	4800	interaction281082	3-5562000	+	2540	3-5556000	+	1845	5775	48	0.069862	-142.244789	0	11	0.069862	1100	-18.458917	1060	1071	-35.4554	3700	-52	-3.57997220945164	2.43644009285561e-18	4.44980380048126	7.78717924610167e-40
21628000	21630000	AT1G58300	yes	Chr1	21628011	21629996	2.51258	2.57575	21626000	21628000	AT1G58290	NA	Chr1	21623725	21626200	0.843816	0.783196	5300	interaction107096	1-21628000	+	1499	1-21626000	+	552	2051	53	0.069862	-163.798538	0	14	0.069862	1400	-26.400815	825	287	-35.4388	3900	-60	7.67438695256217	3.42530807147747e-07	3.23229656424588	1.62199574631902e-106
19048000	19050000	AT2G46410	NA	Chr2	19049171	19050341	0.932768	0.877294	19040000	19042000	AT2G46380	NA	Chr2	19039201	19042348	0.592548	0.621915	5800	interaction248827	2-19048000	+	1278	2-19040000	+	2410	7918	58	0.069862	-182.708235	0	16	0.069862	1600	-31.781185	627	1339	-35.4228	4200	-68	-1.18101531043665	1.16893957372546e-05	2.24082992686525	2.74050129469884e-11
18880000	18882000	AT3G50790	NA	Chr3	18879922	18881982	0.730853	0.783005	18868000	18870000	AT3G50760	yes	Chr3	18868064	18869384	4.28325	2.00019	2300	interaction350344	3-18880000	+	1457	3-18868000	+	1402	12363	23	0.069862	-52.730248	0	2	0.069862	200	-1.330894	808	709	-35.4039	2100	-18	2.33258477707651	5.9756984868132e-41	-0.855254145333782	0.0305220781056319
7324000	7326000	AT2G16900	NA	Chr2	7323614	7326221	0.765405	0.796096	7316000	7318000	AT2G16890	yes	Chr2	7316888	7319181	2.88543	3.26756	5600	interaction187327	2-7324000	+	1934	2-7316000	+	1388	7385	56	0.069862	-174.420412	0	15	0.069862	1500	-28.977736	964	646	-35.3489	4100	-64	-0.825974122407573	0.00348462959840701	-2.00091319002809	6.68449357432508e-06
10928000	10930000	AT4G20235	yes	Chr4	10929145	10931277	3.0347	1.63069	10926000	10928000	AT4G20230	yes	Chr4	10924120	10926758	2.62847	2.09809	11700	interaction429173	4-10928000	+	1575	4-10926000	+	2069	2328	117	0.069862	-448.812132	0	51	0.069862	5100	-155.257446	674	1062	-35.2807	6600	-168	-4.42468383305961	1.79860229351388e-16	-2.60830014662362	1.37775781618707e-21
12588000	12590000	AT1G34430	NA	Chr1	12587751	12590192	0.765751	0.69088	12584000	12586000	AT1G34420	NA	Chr1	12584586	12587570	0.626819	0.605981	18200	interaction65803	1-12588000	+	1904	1-12584000	+	2038	3351	182	0.069862	-778.489825	0	96	0.069862	9600	-350.50361	1130	1113	-35.2495	8600	-290	1.12001336577316	4.66065053461952e-23	-3.07252881909651	3.66098533715935e-22
12986000	12988000	AT4G25410	yes	Chr4	12985754	12987217	4.53417	4.11508	12980000	12982000	AT4G25400	yes	Chr4	12981294	12982468	5.11722	2.87462	6900	interaction439700	4-12986000	+	1936	4-12980000	+	1443	5972	69	0.069862	-228.781492	0	22	0.069862	2200	-49.936232	687	421	-35.2066	4700	-84	-2.66380163178544	5.58492089495126e-10	-5.74654356726695	2.8521010043939e-26
25446000	25448000	AT1G67865	yes	Chr1	25446288	25446737	4.59849	4.99231	25444000	25446000	AT1G67860	yes	Chr1	25444804	25445263	4.63848	5.23603	10600	interaction126960	1-25446000	+	1501	1-25444000	+	1566	2075	106	0.069862	-396.294529	0	44	0.069862	4400	-127.557178	731	862	-35.1973	6200	-148	4.09424911093281	9.60507238638465e-37	8.17116331258006	4.78048484037085e-52
2822000	2824000	AT1G08820	NA	Chr1	2821551	2825275	0.740831	0.760473	2806000	2808000	AT1G08760	NA	Chr1	2805370	2808621	0.668479	0.715932	3000	interaction14725	1-2822000	+	2062	1-2806000	+	1954	15547	30	0.069862	-75.834623	0	4	0.069862	400	-3.966859	1108	1189	-35.1876	2600	-28	-0.594240517744522	0.00206456068027687	-0.294392303727801	0.0295137984725827
21416000	21418000	AT3G57810	yes	Chr3	21415783	21417948	0.783564	0.721079	21402000	21404000	AT3G57780	NA	Chr3	21399765	21402899	0.611638	0.587228	3300	interaction363614	3-21416000	+	2267	3-21402000	+	1893	14112	33	0.069862	-86.288512	0	5	0.069862	500	-5.615522	1526	1213	-35.1872	2800	-32	1.40968087148652	3.15679423440062e-32	1.573011115028	9.42252811078709e-12
25490000	25492000	AT5G63680	NA	Chr5	25490072	25492752	0.703523	0.696297	25488000	25490000	AT5G63670	NA	Chr5	25487926	25489428	0.811125	0.790508	15500	interaction597822	5-25490000	+	2961	5-25488000	+	1639	2103	155	0.069862	-638.594087	0	77	0.069862	7700	-264.951728	1830	865	-35.148	7800	-238	-1.03469186417781	1.62399974756814e-11	0.635149984373619	0.000140186511699736
23932000	23934000	AT5G59340	yes	Chr5	23933403	23934690	2.96798	3.434	23930000	23932000	AT5G59330	yes	Chr5	23931317	23931889	4.26695	4.9594	12700	interaction590102	5-23932000	+	1324	5-23930000	+	1319	1398	127	0.069862	-498.720166	0	58	0.069862	5800	-183.981831	648	705	-35.1475	6900	-186	3.53951224825287	1.5443249783415e-16	7.52901216994125	2.65414822770332e-11
2838000	2840000	AT3G09250	NA	Chr3	2838999	2840614	0.781919	0.665428	2828000	2830000	AT3G09220	yes	Chr3	2827238	2830542	3.78848	4.18537	4300	interaction266526	3-2838000	+	1623	3-2828000	+	3356	10520	43	0.069862	-123.04581	0	9	0.069862	900	-13.740908	658	1375	-35.089	3400	-46	2.34971300988773	6.64504060802139e-53	-5.9971812975417	8.21898788694029e-23
27654000	27656000	AT1G73580	yes	Chr1	27654840	27655518	1.54394	1.32315	27652000	27654000	AT1G73570	NA	Chr1	27650991	27653942	0.81495	0.832963	25500	interaction137948	1-27654000	+	1763	1-27652000	+	2263	1858	255	0.069862	-1181.887435	0	152	0.069862	15200	-627.130118	1075	1381	-35.0839	10300	-442	-5.52389102906971	8.54244432912616e-26	1.46630733682235	4.7242466249864e-09
4870000	4872000	AT1G14250	yes	Chr1	4868451	4871488	1.32091	2.09904	4862000	4864000	AT1G14230	NA	Chr1	4861265	4864094	0.811595	0.818111	6200	interaction25501	1-4870000	+	1583	1-4862000	+	2182	7778	62	0.069862	-199.022289	0	18	0.069862	1800	-37.48599	951	1022	-35.0779	4400	-74	7.67330935752427	7.83181283063189e-50	-0.814159055959175	5.43170103447338e-10
25658000	25660000	AT5G64120	yes	Chr5	25659305	25661002	4.88189	5.34733	25650000	25652000	AT5G64100	yes	Chr5	25650640	25652123	4.54956	4.75674	4500	interaction598725	5-25658000	+	1578	5-25650000	+	1341	7991	45	0.069862	-130.816057	0	10	0.069862	1000	-16.09057	674	455	-35.0578	3500	-48	-2.56657160448643	1.53594421712067e-11	-4.99920448139462	4.65087914810901e-45
21704000	21706000	AT1G58410	yes	Chr1	21701184	21704255	2.46631	0.919256	21696000	21698000	AT1G58400	yes	Chr1	21696164	21699118	1.68067	0.699324	4300	interaction107541	1-21704000	+	1430	1-21696000	+	2615	7715	43	0.069862	-123.118875	0	9	0.069862	900	-13.738707	693	1494	-35.0457	3400	-46	-2.73487438973555	1.21555502561119e-19	-2.80330429409212	4.34060113728482e-08
10126000	10128000	AT1G29025	NA	Chr1	10124347	10127068	0.705936	0.938335	10122000	10124000	AT1G29020	yes	Chr1	10120496	10122902	0.892388	1.232	6900	interaction52965	1-10126000	+	2119	1-10122000	+	1185	3727	69	0.069862	-229.1382	0	22	0.069862	2200	-49.743216	1250	673	-35.0285	4700	-84	-5.44123955854727	2.33655676946666e-51	-4.000752555755	1.3063560194094e-40
18348000	18350000	AT2G44460	yes	Chr2	18346438	18349966	2.024	3.57495	18340000	18342000	AT2G44450	yes	Chr2	18340920	18343849	0.906797	0.71697	3800	interaction245483	2-18348000	+	1889	2-18340000	+	1186	7880	38	0.069862	-104.510526	0	7	0.069862	700	-9.420823	905	570	-34.9218	3100	-38	4.7302142469906	9.40702577162091e-08	-2.51446644647063	1.58371302627513e-50
16636000	16638000	AT2G39855	yes	Chr2	16637676	16639308	2.17481	2.33859	16630000	16632000	AT2G39850	yes	Chr2	16630472	16634253	2.20294	2.52253	12900	interaction236469	2-16636000	+	1973	2-16630000	+	2155	5373	129	0.069862	-506.471341	0	59	0.069862	5900	-187.047083	1101	1229	-34.9081	7000	-188	6.30833167203227	6.90851595354897e-10	6.78570065219287	1.41654836591021e-36
11182000	11184000	AT4G20890	NA	Chr4	11182091	11184072	0.744233	0.722946	11176000	11178000	AT4G20870	NA	Chr4	11174449	11176881	0.802728	0.744148	3800	interaction430059	4-11182000	+	1792	4-11176000	+	1078	6365	38	0.069862	-104.56817	0	7	0.069862	700	-9.419594	954	597	-34.885	3100	-38	-0.755242741085252	0.00062181783092911	0.57579640055893	2.9634947384215e-06
14770000	14772000	AT4G30190	yes	Chr4	14770498	14776058	0.735256	0.712577	14764000	14766000	AT4G30170	yes	Chr4	14762840	14764627	3.7265	3.25773	3500	interaction449364	4-14770000	+	2016	4-14764000	+	787	6467	35	0.069862	-93.832728	0	6	0.069862	600	-7.464585	996	287	-34.8752	2900	-34	-2.95337920966179	2.66475105904154e-24	-5.06996518156847	1.12933663722793e-88
15952000	15954000	AT2G38110	yes	Chr2	15952606	15955494	2.97575	3.63121	15944000	15946000	AT2G38090	NA	Chr2	15944710	15947085	0.878507	0.769302	5998.327432	interaction232900	2-15952000	+	2873	2-15944000	+	2036	7873	63	0.073376	-202.932553	0	17	0.069862	1700	-34.558302	1473	1099	-34.857	4298.33	-76	-1.24026273740141	0.0010289033173313	-1.46731278373976	1.85409562170177e-08
19132000	19134000	AT3G51580	NA	Chr3	19130767	19133347	0.832567	0.692316	19128000	19130000	AT3G51570	yes	Chr3	19126357	19130456	0.675454	0.670082	15200	interaction351715	3-19132000	+	1786	3-19128000	+	3000	3509	152	0.069862	-622.585754	0	75	0.069862	7500	-255.627615	1008	1951	-34.8534	7700	-232	-0.669691131577657	4.38586457399339e-06	-4.29046488199031	1.02785240282081e-06
9966000	9968000	AT2G23410	yes	Chr2	9966129	9967772	1.53662	2.36871	9964000	9966000	AT2G23400	yes	Chr2	9963977	9965229	1.30378	2.19639	19100	interaction201297	2-9966000	+	1433	2-9964000	+	1588	1852	191	0.069862	-829.856131	0	104	0.069862	10400	-388.663726	1006	1019	-34.7628	8700	-310	-6.36368443344776	5.41646938111326e-19	-6.21935226331741	8.29998000841223e-13
14654000	14656000	AT2G34730	NA	Chr2	14654356	14657623	0.811722	0.707527	14648000	14650000	AT2G34720	yes	Chr2	14649766	14651627	0.832246	0.814867	1900	interaction226041	2-14654000	+	1742	2-14648000	+	798	5935	19	0.069862	-40.48267	0	1	0.069862	100	-0.458019	955	444	-34.7232	1800	-14	-0.650358474529913	5.88824958914395e-10	1.00212111047204	7.93913712670298e-06
25656000	25658000	AT5G64110	yes	Chr5	25654073	25656030	4.7651	5.19508	25650000	25652000	AT5G64100	yes	Chr5	25650640	25652123	4.54956	4.75674	3500	interaction598716	5-25656000	+	805	5-25650000	+	1341	5306	35	0.069862	-93.816271	0	6	0.069862	600	-7.460213	326	455	-34.6993	2900	-34	3.33691506074173	4.46464744634949e-83	-4.99920448139462	4.65087914810901e-45
1936000	1938000	AT5G06340	NA	Chr5	1936365	1938114	0.789867	0.782582	1934000	1936000	AT5G06330	yes	Chr5	1934738	1935644	4.11614	2.39125	8400	interaction478250	5-1936000	+	1106	5-1934000	+	1734	1532	84	0.069862	-295.471835	0	31	0.069862	3100	-79.94546	503	657	-34.6575	5300	-110	1.61119312566205	4.28411762852405e-37	-4.55980829950663	6.24182222623195e-39
24124000	24126000	AT1G64940	yes	Chr1	24123788	24125324	1.95178	1.74205	24118000	24120000	AT1G64920	yes	Chr1	24117439	24118798	2.32399	2.21812	7800	interaction119758	1-24124000	+	2566	1-24118000	+	2048	6002	78	0.069862	-267.356706	0	27	0.069862	2700	-65.842352	1298	1023	-34.6275	5100	-100	-2.65618310595819	1.84335271900785e-06	-6.3169750623023	8.50225502681522e-47
19422000	19424000	AT1G52160	NA	Chr1	19420714	19424439	0.742493	0.752784	19416000	19418000	AT1G52155	NA	Chr1	19417665	19419853	0.776938	0.791881	4900	interaction96229	1-19422000	+	2262	1-19416000	+	969	6057	49	0.069862	-146.730876	0	12	0.069862	1200	-21.025927	1276	473	-34.5346	3700	-54	-0.674356103139212	0.000108220828337128	-1.04026150158954	2.38749088245361e-14
9094000	9096000	AT1G26300	yes	Chr1	9095899	9099754	1.07771	0.966794	9092000	9094000	AT1G26270	NA	Chr1	9089523	9092457	0.764049	0.761787	6400	interaction47420	1-9094000	+	684	1-9092000	+	1479	1249	64	0.069862	-209.104296	0	20	0.069862	2000	-43.88477	294	774	-34.4377	4400	-78	-0.502684036089818	0.000157327229464015	-0.640826330616312	6.88969765344655e-06
7454000	7456000	AT3G21240	yes	Chr3	7454268	7457379	0.968716	0.887243	7448000	7450000	AT3G21230	yes	Chr3	7448039	7452000	1.07866	0.87314	6700	interaction291693	3-7454000	+	1849	3-7448000	+	1970	5980	67	0.069862	-219.897061	0	21	0.069862	2100	-46.554531	870	1082	-34.4192	4600	-82	-2.23163761600784	6.37150666995582e-80	-1.88253389402041	3.76207980676136e-21
12342000	12344000	AT2G28780	yes	Chr2	12340033	12343421	4.01266	3.56232	12336000	12338000	AT2G28760	yes	Chr2	12336187	12339027	1.55982	1.22369	7600	interaction213302	2-12342000	+	2481	2-12336000	+	1881	6068	76	0.069862	-258.704282	0	26	0.069862	2600	-62.540684	1140	958	-34.4151	5000	-96	-4.45253753835839	8.97821082218052e-20	-1.40260758933733	5.36055699479863e-12
18726000	18728000	AT2G45430	yes	Chr2	18727560	18728935	5.0685	1.91042	18720000	18722000	AT2G45420	yes	Chr2	18718347	18720729	4.46378	4.61343	3200	interaction247302	2-18726000	+	929	2-18720000	+	1686	6958	32	0.069862	-83.03438	0	5	0.069862	500	-5.635177	255	718	-34.3864	2700	-30	-5.40487198767859	6.69659065737101e-56	-2.78095820321016	7.20867446078499e-08
23938000	23940000	AT1G64440	NA	Chr1	23937029	23939899	0.761626	0.724812	23934000	23936000	AT1G64430	NA	Chr1	23933379	23936867	0.83493	0.717314	18500	interaction118750	1-23938000	+	2408	1-23934000	+	2093	3589	185	0.069862	-793.584243	0	99	0.069862	9900	-364.485104	1415	1124	-34.298	8600	-296	-0.853436079512215	7.62079906473841e-09	2.90061302597027	3.93337872775636e-267
20234000	20236000	AT5G49800	yes	Chr5	20234641	20236184	2.31552	2.17683	20226000	20228000	AT5G49770	yes	Chr5	20222668	20227267	2.25492	3.04487	6624.258243	interaction571377	5-20234000	+	1988	5-20226000	+	3341	8049	79	0.083317	-271.810131	0	21	0.069862	2100	-46.525414	1001	1681	-34.2565	4524.26	-100	0.505224059118484	0.0041677806283693	-5.34104187031063	1.2767702966006e-56
5588000	5590000	AT3G16450	yes	Chr3	5588393	5590055	3.42818	3.68913	5570000	5572000	AT3G16410	yes	Chr3	5571991	5574541	2.33482	2.54081	3500	interaction281239	3-5588000	+	2604	3-5570000	+	1570	17986	35	0.069862	-93.468451	0	6	0.069862	600	-7.448258	896	520	-34.2283	2900	-34	-3.26200979429494	9.57923125397121e-16	-4.06210710584225	3.8050475675441e-40
22442000	22444000	AT3G60720	yes	Chr3	22441770	22443771	2.53692	1.78235	22438000	22440000	AT3G60700	yes	Chr3	22438401	22439205	3.61556	1.86137	9800	interaction369156	3-22442000	+	2251	3-22438000	+	1001	3905	98	0.069862	-360.342865	0	40	0.069862	4000	-112.929196	1043	468	-34.2275	5800	-134	-1.06602728235896	0.00327738899654147	-1.97549726521586	0.00202671075423251
3210000	3212000	AT5G10230	yes	Chr5	3209539	3211423	1.82196	2.14265	3204000	3206000	AT5G10200	NA	Chr5	3201517	3204709	0.697795	0.69996	6500	interaction485076	5-3210000	+	1728	5-3204000	+	1736	5742	65	0.069862	-211.509522	0	20	0.069862	2000	-43.486802	865	868	-34.2267	4500	-78	-5.0415174674556	3.07810980689829e-33	-0.385989890380961	0.00015472925219758
24112000	24114000	AT1G64900	yes	Chr1	24113214	24114984	2.34002	4.12174	24110000	24112000	AT1G64890	NA	Chr1	24109541	24111400	0.747772	0.927096	10200	interaction119665	1-24112000	+	2680	1-24110000	+	1820	2868	102	0.069862	-376.798824	0	42	0.069862	4200	-119.675031	1449	900	-34.1749	6000	-140	3.96602265979956	4.54942427345146e-51	-1.0422318371362	0.000866905284961001
12336000	12338000	AT2G28760	yes	Chr2	12336187	12339027	1.55982	1.22369	12334000	12336000	AT2G28755	yes	Chr2	12334171	12334459	1.39006	0.983504	15100	interaction213254	2-12336000	+	1881	2-12334000	+	1757	2051	151	0.069862	-617.583666	0	75	0.069862	7500	-256.211795	958	836	-34.1261	7600	-230	-1.40260758933733	5.36055699479863e-12	-2.20857460113574	0.000627199474236965
11378000	11380000	AT1G31772	yes	Chr1	11378939	11379414	2.0181	0.822074	11374000	11376000	AT1G31770	yes	Chr1	11374892	11377794	0.6472	0.712558	2200	interaction59728	1-11378000	+	1457	1-11374000	+	277	4751	22	0.069862	-50.208893	0	2	0.069862	200	-1.330899	679	140	-34.0341	2000	-18	-5.05533977400226	2.44937503654948e-10	-3.04000964125715	1.34280401131847e-38
26216000	26218000	AT5G65600	NA	Chr5	26216125	26218153	0.609932	0.712192	26212000	26214000	AT5G65590	yes	Chr5	26211745	26213136	3.7196	3.87873	9400	interaction601134	5-26216000	+	2278	5-26212000	+	2064	3889	94	0.069862	-339.356224	0	37	0.069862	3700	-100.93311	1220	1015	-34.0294	5700	-126	-1.68558019113314	0.0197691630397441	4.8221837449772	1.35736820947185e-56
26288000	26290000	AT1G69830	NA	Chr1	26288277	26293053	0.853408	0.734181	26278000	26280000	AT1G69810	yes	Chr1	26277237	26279118	3.79541	3.62703	4000	interaction131017	1-26288000	+	1250	1-26278000	+	1711	9981	40	0.069862	-111.895808	0	8	0.069862	800	-11.520253	733	672	-34.0287	3200	-40	2.29592516748118	1.72662866593644e-45	-4.50117745250661	8.24811291983844e-96
10748000	10750000	AT1G30420	NA	Chr1	10748815	10756316	0.555092	0.574199	10746000	10748000	AT1G30410	NA	Chr1	10738804	10747323	0.670725	0.590847	11900	interaction56349	1-10748000	+	2054	1-10746000	+	2159	2394	119	0.069862	-457.445213	0	53	0.069862	5300	-162.545573	1094	1262	-34.0286	6600	-170	-2.00562702246781	2.07427282472961e-14	0.855140707877772	0.00415610894190424
7252000	7254000	AT1G20850	yes	Chr1	7252173	7253731	0.67055	0.708318	7246000	7248000	AT1G20840	NA	Chr1	7244938	7248143	0.689373	0.703309	8313.11054	interaction38051	1-7252000	+	1817	1-7246000	+	3429	5997	93	0.078156	-335.052248	0	31	0.069862	3100	-79.551936	897	1828	-33.9946	5213.11	-124	-0.941201299134978	0.000739273383996888	-1.97220525565701	1.23908624348107e-12
21102000	21104000	AT5G51930	yes	Chr5	21101122	21103568	2.23433	1.50339	21096000	21098000	AT5G51920	yes	Chr5	21097105	21098959	1.12065	0.897465	6400	interaction575741	5-21102000	+	1966	5-21096000	+	973	5317	64	0.069862	-208.206962	0	20	0.069862	2000	-43.663079	985	463	-33.9857	4400	-78	-5.30195612504147	5.98013282685632e-14	-1.76580034690571	3.91180254511679e-11
9440000	9442000	AT1G27180	yes	Chr1	9439858	9446106	0.585244	0.562684	9434000	9436000	AT1G27170	yes	Chr1	9433487	9439417	0.531624	0.611092	15107.655435	interaction49335	1-9440000	+	2324	1-9434000	+	2998	5699	189	0.087399	-814.004538	0	76	0.069862	7600	-259.58861	1192	1621	-33.9849	7507.66	-304	-1.35096398754296	1.11487849214374e-22	-2.12581343158176	2.31837441610573e-26
12890000	12892000	AT2G30220	yes	Chr2	12891265	12892537	2.61355	3.12401	12888000	12890000	AT2G30210	yes	Chr2	12887445	12889874	1.81469	1.82266	24200	interaction216467	2-12890000	+	1867	2-12888000	+	2745	2057	242	0.069862	-1107.193595	0	143	0.069862	14300	-580.898602	1069	1689	-33.9838	9900	-414	-6.39933215405814	3.69335144195912e-08	-4.80121996619546	2.3844137792559e-22
21036000	21038000	AT5G51780	yes	Chr5	21034822	21036773	4.38886	1.69559	21032000	21034000	AT5G51770	yes	Chr5	21031029	21032994	0.704095	0.804053	2600	interaction575382	5-21036000	+	958	5-21032000	+	1405	3823	26	0.069862	-62.540684	0	3	0.069862	300	-2.524641	430	786	-33.9698	2300	-22	-3.34563693642645	2.7240340283086e-07	-1.02528159000886	8.27567125635597e-10
10128000	10130000	AT1G29030	NA	Chr1	10129034	10133961	0.750799	0.654361	10120000	10122000	AT1G29020	yes	Chr1	10120496	10122902	0.892388	1.232	7400	interaction52982	1-10128000	+	2000	1-10120000	+	2619	7671	74	0.069862	-249.890582	0	25	0.069862	2500	-59.215506	1110	1392	-33.9479	4900	-92	-0.579993916320732	1.61037475024367e-05	-4.000752555755	1.3063560194094e-40
19358000	19360000	AT1G52060	yes	Chr1	19359038	19360675	2.82316	3.36325	19356000	19358000	AT1G52050	yes	Chr1	19354918	19356764	3.08597	3.54472	9800	interaction95846	1-19358000	+	1149	1-19356000	+	1650	2261	98	0.069862	-359.703782	0	40	0.069862	4000	-112.292482	758	908	-33.9221	5800	-134	-5.14933175018769	2.39862909990523e-13	-5.2397057101088	1.08553216977369e-22
18458000	18460000	AT5G45540	yes	Chr5	18458153	18460821	0.742726	0.880661	18444000	18446000	AT5G45510	NA	Chr5	18444656	18449446	0.689528	0.713764	4000	interaction562217	5-18458000	+	3120	5-18444000	+	1500	13735	40	0.069862	-111.794895	0	8	0.069862	800	-11.515292	1913	795	-33.9152	3200	-40	2.27523978651604	5.26999271272829e-08	-1.40688633093249	2.38377825274804e-23
10188000	10190000	AT4G18440	NA	Chr4	10186130	10188909	0.68499	0.698433	10184000	10186000	AT4G18430	yes	Chr4	10183716	10185280	1.25354	1.07241	7500	interaction425392	4-10188000	+	1391	4-10184000	+	1530	4060	75	0.069862	-254.85586	0	26	0.069862	2600	-62.73957	725	592	-33.9103	4900	-94	1.35581051278423	6.57152976063643e-06	-5.52495356382313	1.04227940492773e-40
17630000	17632000	AT4G37520	yes	Chr4	17631561	17633249	1.41757	1.12201	17628000	17630000	AT4G37510	yes	Chr4	17626103	17628947	0.749899	0.639453	7300	interaction463710	4-17630000	+	1067	4-17628000	+	1304	1530	73	0.069862	-246.708932	0	25	0.069862	2500	-59.665934	403	614	-33.9015	4800	-92	-1.67732674090445	3.35842274539227e-06	3.3489242266611	1.34871578819006e-186
4866000	4868000	AT1G14240	yes	Chr1	4864901	4868000	2.53929	2.87178	4858000	4860000	AT1G14220	yes	Chr1	4858641	4859601	2.39879	3.47103	4000	interaction25478	1-4866000	+	1925	1-4858000	+	1709	8016	40	0.069862	-111.733377	0	8	0.069862	800	-11.513245	887	860	-33.8686	3200	-40	-4.23283579024921	2.31320764436426e-22	-4.94100930498893	9.28339906374772e-16
8726000	8728000	AT4G15290	yes	Chr4	8721486	8726669	2.55785	2.69401	8716000	8718000	AT4G15270	yes	Chr4	8716600	8717796	3.53459	3.93868	6100	interaction417489	4-8726000	+	1848	4-8716000	+	2460	9575	61	0.069862	-194.691823	0	18	0.069862	1800	-37.490892	920	1407	-33.8377	4300	-72	-6.24561260387971	2.76335968799073e-30	-5.16432884564781	1.30028186386445e-20
15988000	15990000	AT4G33150	NA	Chr4	15985188	15991538	0.666487	0.669915	15982000	15984000	AT4G33140	NA	Chr4	15981404	15984351	0.680583	0.716419	11400	interaction455485	4-15988000	+	1772	4-15982000	+	2582	5900	114	0.069862	-433.857216	0	50	0.069862	5000	-150.695458	968	1446	-33.8249	6400	-162	-1.36156448209978	1.57178748970884e-11	-0.707984094439836	0.00110231548285742
7726000	7728000	AT5G23030	yes	Chr5	7726787	7727809	4.28679	5.54192	7718000	7720000	AT5G23020	yes	Chr5	7718120	7721839	3.24474	2.76257	7300	interaction509099	5-7726000	+	1179	5-7718000	+	2403	8114	73	0.069862	-246.470719	0	25	0.069862	2500	-59.441815	588	1202	-33.7924	4800	-92	-5.40230726119489	3.04128738939876e-22	-1.93041247556644	5.24464827630554e-06
15428000	15430000	AT5G38540	yes	Chr5	15426809	15428710	2.36246	2.98421	15424000	15426000	AT5G38530	yes	Chr5	15424037	15426470	1.16572	1.12615	11800	interaction547037	5-15428000	+	1338	5-15424000	+	2184	3307	118	0.069862	-454.467443	0	53	0.069862	5300	-163.348137	670	1130	-33.783	6500	-170	-6.98797351011215	5.00214484398665e-15	-0.940978045960481	7.48232653945848e-18
19600000	19602000	AT3G52880	NA	Chr3	19601211	19604454	0.803078	0.747438	19588000	19590000	AT3G52850	NA	Chr3	19587820	19591947	0.849913	0.784084	4000	interaction354052	3-19600000	+	1702	3-19588000	+	1837	12188	40	0.069862	-111.735191	0	8	0.069862	800	-11.509077	1032	1065	-33.7742	3200	-40	0.617688983264252	2.29573287452798e-20	-0.438922840396093	6.61547717283718e-06
19258000	19260000	AT1G51860	yes	Chr1	19257633	19261479	1.06514	1.24629	19254000	19256000	AT1G51850	yes	Chr1	19252846	19256783	1.8269	2.22887	8400	interaction95180	1-19258000	+	1628	1-19254000	+	1860	3618	84	0.069862	-294.440274	0	31	0.069862	3100	-79.481194	1046	1109	-33.7588	5300	-110	-3.9470916890788	1.17390857614013e-46	-2.49074814184352	7.10242737769867e-09
11702000	11704000	AT4G22080	yes	Chr4	11700554	11702666	3.44144	3.9429	11694000	11696000	AT4G22070	yes	Chr4	11691377	11694392	4.23164	4.71163	6800	interaction432782	4-11702000	+	3276	4-11694000	+	1599	8150	68	0.069862	-224.345356	0	22	0.069862	2200	-49.729996	1720	702	-33.7531	4600	-84	-5.80722278362447	5.47366843625422e-28	-4.95156597227949	8.85151269780998e-26
10976000	10978000	AT2G25737	NA	Chr2	10976935	10979900	0.735249	0.754132	10962000	10964000	AT2G25730	NA	Chr2	10956300	10972927	0.811425	0.720457	2600	interaction206456	2-10976000	+	1342	2-10962000	+	2429	14130	26	0.069862	-62.449446	0	3	0.069862	300	-2.523536	732	1538	-33.7382	2300	-22	0.554988606791666	0.000616636498988423	-0.499284915161877	3.9767340778697e-05
5758000	5760000	AT5G17460	yes	Chr5	5757097	5759795	0.975131	0.794457	5744000	5746000	AT5G17430	yes	Chr5	5742541	5745568	3.76845	3.52873	2600	interaction498501	5-5758000	+	1793	5-5744000	+	2120	14016	26	0.069862	-62.39245	0	3	0.069862	300	-2.523336	839	1153	-33.6966	2300	-22	-1.99988085367193	8.11683104469291e-51	-4.71095167884754	1.51235067442096e-24
18564000	18566000	AT3G50070	NA	Chr3	18565133	18566780	0.761934	0.660308	18558000	18560000	AT3G50060	yes	Chr3	18557969	18559106	0.822087	0.942855	5500	interaction348786	3-18564000	+	1514	3-18558000	+	1478	6389	55	0.069862	-170.290529	0	15	0.069862	1500	-28.94364	847	942	-33.6824	4000	-62	-0.331163218708275	0.030262873484294	2.89049980036164	8.91083303508546e-33
9152000	9154000	AT1G26460	NA	Chr1	9151731	9154740	0.781693	0.731396	9148000	9150000	AT1G26450	yes	Chr1	9148709	9150250	1.03098	1.21563	10300	interaction47811	1-9152000	+	3024	1-9148000	+	1759	3676	103	0.069862	-381.592926	0	43	0.069862	4300	-123.492331	1760	892	-33.6782	6000	-142	-0.389981794737575	0.0027132005567949	-1.09738580113077	1.16736526208168e-08
8664000	8666000	AT2G20080	yes	Chr2	8662929	8665026	3.73423	2.90399	8652000	8654000	AT2G20050	NA	Chr2	8649433	8654450	0.775022	0.64272	2589.259561	interaction194641	2-8664000	+	2565	2-8652000	+	2348	11536	28	0.075549	-69.00501	0	3	0.069862	300	-2.523036	1074	1347	-33.6347	2289.26	-24	-6.56655089462458	5.50771107348426e-22	0.923021782042295	5.10253336925847e-13
5444000	5446000	AT3G16050	yes	Chr3	5443949	5445329	0.548433	0.641683	5440000	5442000	AT3G16030	NA	Chr3	5439608	5442802	0.649547	0.553923	20700	interaction280539	3-5444000	+	2457	3-5440000	+	2223	3495	207	0.069862	-911.263893	0	116	0.069862	11600	-444.792955	1492	1328	-33.6287	9100	-340	-1.04550738762963	0.000115160408131716	-0.977337297180693	0.00155456960912964
20228000	20230000	AT5G49780	yes	Chr5	20229255	20233095	1.73014	2.20718	20224000	20226000	AT5G49770	yes	Chr5	20222668	20227267	2.25492	3.04487	11016.571967	interaction571336	5-20228000	+	2463	5-20224000	+	2422	3692	118	0.074831	-452.086586	0	48	0.069862	4800	-142.566412	1352	1201	-33.6186	6216.57	-168	-3.87017635664351	1.65165135046626e-31	-5.34104187031063	1.2767702966006e-56
2894000	2896000	AT3G09405	NA	Chr3	2894811	2897674	0.73268	0.807027	2892000	2894000	AT3G09400	yes	Chr3	2891039	2893629	2.00525	2.41907	15600	interaction266843	3-2894000	+	1829	3-2892000	+	2734	2363	156	0.069862	-642.936943	0	79	0.069862	7900	-273.375464	997	1585	-33.5772	7700	-240	-1.03315806697415	0.000674316409753491	-4.44355288460799	9.06696437783011e-07
11938000	11940000	AT4G22720	NA	Chr4	11936941	11938966	0.822685	0.710095	11934000	11936000	AT4G22710	yes	Chr4	11934968	11936755	0.96095	0.831034	6200	interaction433909	4-11938000	+	1714	4-11934000	+	910	3443	62	0.069862	-199.910131	0	19	0.069862	1900	-40.590689	891	515	-33.5694	4300	-74	-0.39646866483614	0.0333648616029749	-2.603744704606	3.69941968178034e-07
9148000	9150000	AT1G26450	yes	Chr1	9148709	9150250	1.03098	1.21563	9144000	9146000	AT1G26440	yes	Chr1	9143966	9146050	0.707631	0.721846	10600	interaction47780	1-9148000	+	1759	1-9144000	+	2840	4094	106	0.069862	-395.736116	0	45	0.069862	4500	-131.181942	892	1513	-33.565	6100	-148	-1.09738580113077	1.16736526208168e-08	-1.71435620124714	1.70715889658813e-26
8696000	8698000	AT4G15236	NA	Chr4	8696682	8702727	0.435544	0.487588	8694000	8696000	AT4G15233	NA	Chr4	8688288	8694558	0.503166	0.509853	6000	interaction417348	4-8696000	+	1800	4-8694000	+	809	1559	60	0.069862	-191.78286	0	18	0.069862	1800	-37.639123	1082	465	-33.5591	4200	-70	3.92955728032276	6.19505707255257e-13	0.964055474610302	0.021634226872707
2480000	2482000	AT5G07780	yes	Chr5	2479513	2482850	1.34552	1.62079	2474000	2476000	AT5G07770	yes	Chr5	2474641	2479402	0.736543	0.924843	7100	interaction481282	5-2480000	+	1138	5-2474000	+	2473	6062	71	0.069862	-237.856828	0	24	0.069862	2400	-56.2376	522	1222	-33.5586	4700	-88	-5.71381487368068	5.90979454184125e-24	-1.05714209633544	5.86956427518865e-05
12444000	12446000	AT2G28970	yes	Chr2	12443918	12448163	2.60862	3.17103	12440000	12442000	AT2G28960	yes	Chr2	12437913	12442347	3.14401	3.61957	9200	interaction213806	2-12444000	+	2244	2-12440000	+	1855	3863	92	0.069862	-330.420322	0	36	0.069862	3600	-97.250685	1366	1079	-33.5364	5600	-122	-5.31659103601611	4.18982468697422e-130	-5.37376641598813	2.41102155837694e-45
21458000	21460000	AT5G52910	NA	Chr5	21457626	21463159	0.64362	0.608532	21444000	21446000	AT5G52890	yes	Chr5	21444834	21447240	0.775691	0.692301	5300	interaction577502	5-21458000	+	1974	5-21444000	+	1512	13710	53	0.069862	-162.200469	0	14	0.069862	1400	-26.19703	1355	1058	-33.5132	3900	-60	1.27552741756598	0.00042239266383781	2.4624861535895	4.13355487192208e-27
8758000	8760000	AT4G15340	yes	Chr4	8754479	8760589	3.6038	3.22206	8750000	8752000	AT4G15330	yes	Chr4	8751386	8753157	3.71587	4.2347	2900	interaction417645	4-8758000	+	951	4-8750000	+	1924	7791	29	0.069862	-72.625455	0	4	0.069862	400	-3.970513	493	997	-33.5033	2500	-26	-5.13487434979854	1.16503970603958e-40	-5.65947692352616	3.469458457868e-28
8236000	8238000	AT5G24260	yes	Chr5	8234722	8238244	0.783736	0.77769	8228000	8230000	AT5G24230	yes	Chr5	8228891	8230964	3.66704	4.18694	4400	interaction511751	5-8236000	+	2289	5-8228000	+	1096	7379	44	0.069862	-127.130783	0	10	0.069862	1000	-16.09111	1288	452	-33.5013	3400	-46	-0.360724771774898	0.0015586349234766	-3.38659528333555	1.37897830519644e-16
5758000	5760000	AT5G17460	yes	Chr5	5757097	5759795	0.975131	0.794457	5754000	5756000	AT5G17450	yes	Chr5	5755321	5756888	1.71989	1.48324	6600	interaction498506	5-5758000	+	1793	5-5754000	+	1275	4279	66	0.069862	-216.178512	0	21	0.069862	2100	-46.604441	839	711	-33.4836	4500	-80	-1.99988085367193	8.11683104469291e-51	1.1943671760032	0.0023106767736113
11710000	11712000	AT2G27370	yes	Chr2	11708449	11710004	2.54861	3.18781	11706000	11708000	AT2G27360	yes	Chr2	11706197	11708065	1.0183	1.15947	5200	interaction210183	2-11710000	+	653	2-11706000	+	1626	3547	52	0.069862	-159.350591	0	14	0.069862	1400	-26.33633	372	865	-33.4514	3800	-58	-4.9903261517929	1.60512267164366e-21	-0.599715959902557	0.0170286859893268
17384000	17386000	AT2G41700	NA	Chr2	17382889	17396110	0.896531	0.810558	17380000	17382000	AT2G41690	yes	Chr2	17381722	17382577	2.10666	1.83058	19300	interaction240415	2-17384000	+	2748	2-17380000	+	1998	3214	193	0.069862	-836.735203	0	106	0.069862	10600	-398.372451	1669	977	-33.4293	8700	-312	-0.207739716154084	0.00727362348910528	-3.2534891080187	9.77509296158353e-10
2842000	2844000	AT3G09260	yes	Chr3	2840476	2843781	1.95535	1.02555	2838000	2840000	AT3G09250	NA	Chr3	2838999	2840614	0.781919	0.665428	5600	interaction266545	3-2842000	+	1032	3-2838000	+	1623	3121	56	0.069862	-174.801992	0	16	0.069862	1600	-31.99887	278	658	-33.4185	4000	-64	-3.32343842690156	4.04729596231981e-12	2.34971300988773	6.64504060802139e-53
17262000	17264000	AT5G43040	yes	Chr5	17263964	17265620	3.00455	3.28253	17258000	17260000	AT5G43030	yes	Chr5	17258990	17260685	3.1907	2.85145	7800	interaction556156	5-17262000	+	1414	5-17258000	+	1713	3542	78	0.069862	-268.018445	0	28	0.069862	2800	-69.445277	605	826	-33.3974	5000	-100	-2.48307242687383	6.07507653557663e-18	-4.71239520578968	1.98550882829519e-34
8754000	8756000	AT4G15340	yes	Chr4	8754479	8760589	3.6038	3.22206	8750000	8752000	AT4G15330	yes	Chr4	8751386	8753157	3.71587	4.2347	6400	interaction417622	4-8754000	+	1403	4-8750000	+	1924	3796	64	0.069862	-207.567228	0	20	0.069862	2000	-43.552412	653	997	-33.3807	4400	-76	-5.13487434979854	1.16503970603958e-40	-5.65947692352616	3.469458457868e-28
16512000	16514000	AT5G41290	yes	Chr5	16512325	16513500	2.60439	3.25836	16510000	16512000	AT5G41280	yes	Chr5	16509508	16510929	1.30659	1.32714	8100	interaction552342	5-16512000	+	1762	5-16510000	+	1013	2246	81	0.069862	-282.263454	0	30	0.069862	3000	-76.531942	892	459	-33.3752	5100	-104	-3.61485470735292	5.83324642732389e-12	-5.24771912710187	1.49265912658158e-09
12344000	12346000	AT4G23700	yes	Chr4	12342427	12346043	1.52697	1.82672	12338000	12340000	AT4G23690	yes	Chr4	12338870	12339747	2.74793	2.08757	7300	interaction436281	4-12344000	+	2138	4-12338000	+	1588	5825	73	0.069862	-245.890886	0	25	0.069862	2500	-59.341533	1029	742	-33.3611	4800	-92	-4.31436814061529	2.38626455297008e-47	-4.07992297416125	9.77714562293968e-44
6594000	6596000	AT5G19540	NA	Chr5	6595701	6597889	0.834231	0.631453	6590000	6592000	AT5G19530	yes	Chr5	6588957	6591363	2.24083	1.96363	7600	interaction503124	5-6594000	+	1149	5-6590000	+	2000	3907	76	0.069862	-259.679792	0	27	0.069862	2700	-66.065968	607	1009	-33.2891	4900	-96	2.11386411913935	1.25675006134225e-48	-1.54652390516602	0.000114522705961542
7744000	7746000	AT4G13300	yes	Chr4	7742870	7746363	2.77603	3.11178	7740000	7742000	AT4G13290	yes	Chr4	7740282	7742857	2.04377	2.58768	15300	interaction412228	4-7744000	+	2561	4-7740000	+	2010	4013	153	0.069862	-626.946991	0	77	0.069862	7700	-264.247445	1426	1084	-33.2791	7600	-234	-6.10670377558016	4.59128580795761e-18	-4.09782704328653	6.65823995266971e-16
8336000	8338000	AT5G24420	yes	Chr5	8336613	8338008	2.70384	4.37803	8332000	8334000	AT5G24410	yes	Chr5	8332472	8334066	2.3514	2.95454	8100	interaction512273	5-8336000	+	1301	5-8332000	+	1103	4273	81	0.069862	-281.994817	0	30	0.069862	3000	-76.374827	692	553	-33.2618	5100	-104	5.21648772846971	2.34449118001748e-19	-6.42372843530738	3.30872713007588e-29
26004000	26006000	AT5G65090	NA	Chr5	26004016	26006851	0.739442	0.742714	26002000	26004000	AT5G65080	yes	Chr5	25997503	26002465	2.2605	2.11237	6700	interaction600282	5-26004000	+	1871	5-26002000	+	945	1805	67	0.069862	-221.049338	0	22	0.069862	2200	-49.894353	973	458	-33.2517	4500	-82	-3.57149926734754	3.75346497656246e-30	0.976694524285932	0.000654833711372017
5572000	5574000	AT3G16410	yes	Chr3	5571991	5574541	2.33482	2.54081	5566000	5568000	AT3G16400	yes	Chr3	5566085	5568545	2.21919	1.09908	5200	interaction281132	3-5572000	+	2876	3-5566000	+	1099	5546	52	0.069862	-158.521658	0	14	0.069862	1400	-26.315309	1196	412	-33.2496	3800	-58	-4.06210710584225	3.8050475675441e-40	-1.46013210206601	0.00197838312226521
1516000	1518000	AT3G05327	yes	Chr3	1517418	1518554	0.935385	1.04178	1506000	1508000	AT3G05290	NA	Chr3	1505889	1507702	0.741469	0.757755	2200	interaction259703	3-1516000	+	690	3-1506000	+	2728	10219	22	0.069862	-49.73533	0	2	0.069862	200	-1.330894	363	1682	-33.2136	2000	-18	1.1558644078847	0.0450455736786165	-0.364795953129524	0.00724515401244951
23342000	23344000	AT1G63000	yes	Chr1	23342392	23344113	0.794896	0.748465	23340000	23342000	AT1G62990	yes	Chr1	23337364	23340688	3.65407	1.58844	8800	interaction115563	1-23342000	+	1734	1-23340000	+	1639	2058	88	0.069862	-312.478375	0	34	0.069862	3400	-90.377489	799	652	-33.2086	5400	-116	-1.83511677949882	6.48629022993981e-23	-2.88684996804584	7.26952516052139e-29
13290000	13292000	AT2G31190	NA	Chr2	13291196	13293794	0.806503	0.702988	13286000	13288000	AT2G31180	yes	Chr2	13286720	13288176	1.65747	1.01115	6000	interaction218473	2-13290000	+	1146	2-13286000	+	1148	3448	60	0.069862	-191.132513	0	18	0.069862	1800	-37.586713	563	565	-33.2066	4200	-70	1.37757545153274	3.13929260759988e-16	-3.5829868814963	2.20709718181143e-13
4306000	4308000	AT5G13430	NA	Chr5	4305124	4307513	0.785829	0.699269	4302000	4304000	AT5G13420	NA	Chr5	4301791	4304312	0.692324	0.674454	9600	interaction490812	5-4306000	+	1584	5-4302000	+	2321	3959	96	0.069862	-349.247813	0	39	0.069862	3900	-108.541426	766	1327	-33.1625	5700	-130	-0.82446869030087	2.33847383471818e-15	-1.82346525756239	1.71593333081744e-33
3382000	3384000	AT1G10310	NA	Chr1	3381600	3383914	0.700717	0.749439	3378000	3380000	AT1G10300	NA	Chr1	3378141	3380226	0.742135	0.611698	12200	interaction17664	1-3382000	+	1541	1-3378000	+	2612	3411	122	0.069862	-473.24665	0	56	0.069862	5600	-174.955644	936	1408	-33.1542	6600	-176	1.35323732169151	2.99631193685322e-13	-3.86949382260341	2.45384417766098e-10
3694000	3696000	AT1G11080	yes	Chr1	3694671	3698013	2.96174	2.24063	3690000	3692000	AT1G11070	yes	Chr1	3690211	3693648	0.776178	0.860855	13409.835628	interaction19521	1-3694000	+	1932	1-3690000	+	3289	4467	153	0.07971	-627.190304	0	65	0.069862	6500	-212.306953	1041	1951	-33.153	6909.84	-234	1.62373708776485	7.344961267774e-10	-0.979147264489635	0.00278702229066822
25404000	25406000	AT1G67760	yes	Chr1	25405579	25406372	4.15595	4.49263	25402000	25404000	AT1G67750	yes	Chr1	25401587	25403503	1.8317	1.81608	16700	interaction126724	1-25404000	+	1389	1-25402000	+	2737	2254	167	0.069862	-702.461856	0	88	0.069862	8800	-315.913296	680	1504	-33.1495	7900	-262	-3.30063991148916	2.84093370900699e-10	-1.05310083909291	6.64883961661695e-05
2224000	2226000	AT4G04460	NA	Chr4	2224421	2227874	0.685386	0.662157	2220000	2222000	AT4G04450	yes	Chr4	2218378	2221114	2.93083	3.63048	2200	interaction385666	4-2224000	+	652	4-2220000	+	962	4589	22	0.069862	-49.753531	0	2	0.069862	200	-1.330894	421	649	-33.1455	2000	-18	-1.80422234782085	2.696119586837e-13	-1.29939101146303	2.92644208880497e-07
20340000	20342000	AT1G54460	NA	Chr1	20340599	20343530	0.870623	0.828409	20338000	20340000	AT1G54450	yes	Chr1	20336339	20339535	1.2216	1.44307	11700	interaction100403	1-20340000	+	1221	1-20338000	+	2176	1817	117	0.069862	-450.115387	0	53	0.069862	5300	-163.426012	646	1146	-33.0905	6400	-168	-0.269218207538033	0.0262178520867089	-1.11861487791965	5.19405699296916e-05
3696000	3698000	AT1G11080	yes	Chr1	3694671	3698013	2.96174	2.24063	3690000	3692000	AT1G11070	yes	Chr1	3690211	3693648	0.776178	0.860855	12500	interaction19531	1-3696000	+	1692	1-3690000	+	3289	5953	125	0.069862	-487.489042	0	58	0.069862	5800	-183.369755	847	1951	-33.0495	6700	-182	1.62373708776485	7.344961267774e-10	-0.979147264489635	0.00278702229066822
5540000	5542000	AT3G16340	yes	Chr3	5539787	5546449	0.826049	0.778622	5530000	5532000	AT3G16320	NA	Chr3	5529533	5534663	0.696595	0.69876	4800	interaction280960	3-5540000	+	1311	3-5530000	+	2587	10060	48	0.069862	-142.48881	0	12	0.069862	1200	-21.020623	495	1568	-33.0003	3600	-52	-2.4798721947689	1.37364253743833e-57	-0.859407645490362	0.000125186822442885
8320000	8322000	AT4G14465	yes	Chr4	8320629	8322201	4.9118	1.18567	8308000	8310000	AT4G14450	yes	Chr4	8309473	8310058	3.56232	3.85542	4400	interaction415342	4-8320000	+	2725	4-8308000	+	1820	12093	44	0.069862	-126.79541	0	10	0.069862	1000	-16.054012	985	829	-32.925	3400	-46	-3.11314217606891	3.22211671070818e-56	2.80589905973937	1.40675701612119e-09
16098000	16100000	AT4G33460	NA	Chr4	16098069	16100266	0.838519	0.843912	16092000	16094000	AT4G33440	yes	Chr4	16091939	16094958	0.950263	0.929713	9900	interaction456167	4-16098000	+	2246	4-16092000	+	1715	5966	99	0.069862	-362.951617	0	41	0.069862	4100	-115.922175	1119	870	-32.918	5800	-136	1.45404302113899	6.24649237172189e-28	-0.794435508009044	3.87389413452023e-05
17216000	17218000	AT3G46740	NA	Chr3	17215812	17219343	0.77691	0.720153	17210000	17212000	AT3G46720	NA	Chr3	17210854	17212348	0.684199	0.825778	6300	interaction341613	3-17216000	+	3593	3-17210000	+	856	5203	63	0.069862	-204.260856	0	20	0.069862	2000	-43.691483	2014	431	-32.9108	4300	-76	1.26191259370369	1.10868881225035e-71	-4.81110993567959	2.84339888620485e-46
5538000	5540000	AT3G16340	yes	Chr3	5539787	5546449	0.826049	0.778622	5532000	5534000	AT3G16320	NA	Chr3	5529533	5534663	0.696595	0.69876	3400	interaction280953	3-5538000	+	700	3-5532000	+	2561	6373	34	0.069862	-90.319887	0	6	0.069862	600	-7.46123	316	1624	-32.9083	2800	-32	-2.4798721947689	1.37364253743833e-57	-0.859407645490362	0.000125186822442885
3572000	3574000	AT3G11402	yes	Chr3	3573360	3578125	1.40696	1.91038	3570000	3572000	AT3G11390	yes	Chr3	3569827	3571960	1.96134	3.00245	16112.164737	interaction270804	3-3572000	+	1646	3-3570000	+	4347	2158	207	0.089755	-914.860459	0	86	0.069862	8600	-306.000083	775	2221	-32.904	7512.16	-342	0.812682785175397	0.0295388457021507	-2.11195562379934	7.47385255465368e-05
6054000	6056000	AT1G17600	NA	Chr1	6052935	6056664	0.561867	0.570151	6050000	6052000	AT1G17590	NA	Chr1	6050192	6052568	0.658478	0.738921	15773.566509	interaction31906	1-6054000	+	2756	1-6050000	+	2037	3765	159	0.070422	-657.658959	0	81	0.069862	8100	-281.846784	1701	1160	-32.8802	7673.57	-246	0.989697001928252	0.00304196730698394	-1.66097636884288	2.45341306981345e-15
23106000	23108000	AT5G57100	yes	Chr5	23106301	23108795	0.866956	0.754672	23100000	23102000	AT5G57090	yes	Chr5	23100692	23104735	3.5141	2.2508	5000	interaction585779	5-23106000	+	953	5-23100000	+	2027	5981	50	0.069862	-150.715298	0	13	0.069862	1300	-23.604193	533	997	-32.836	3700	-56	-0.589593375473273	0.000894715501965032	-4.69481380493482	8.38864500551936e-23
25718000	25720000	AT5G64300	NA	Chr5	25718403	25721162	0.734432	0.796084	25716000	25718000	AT5G64290	NA	Chr5	25714177	25716758	0.704373	0.677317	12600	interaction598996	5-25718000	+	1911	5-25716000	+	1589	1874	126	0.069862	-492.714807	0	59	0.069862	5900	-187.350901	1101	922	-32.7607	6700	-184	0.500137896983601	0.000949923222330427	1.39656039406211	6.66640960149856e-75
20232000	20234000	AT5G49780	yes	Chr5	20229255	20233095	1.73014	2.20718	20224000	20226000	AT5G49770	yes	Chr5	20222668	20227267	2.25492	3.04487	7263.302106	interaction571364	5-20232000	+	2691	5-20224000	+	2422	7441	85	0.081758	-298.211855	0	25	0.069862	2500	-59.196342	1371	1201	-32.7451	4763.3	-110	-3.87017635664351	1.65165135046626e-31	-5.34104187031063	1.2767702966006e-56
4164000	4166000	AT1G12260	yes	Chr1	4162831	4165852	3.80067	4.54031	4160000	4162000	AT1G12250	NA	Chr1	4159264	4161455	0.90393	0.867031	12000	interaction22032	1-4164000	+	2371	1-4160000	+	1548	4081	120	0.069862	-463.463404	0	55	0.069862	5500	-170.987636	1237	872	-32.7157	6500	-172	-1.26318791709931	3.14444797827291e-09	3.99686521279688	5.31648942108965e-63
27504000	27506000	AT1G73150	NA	Chr1	27504111	27506112	0.729604	0.656938	27500000	27502000	AT1G73130	NA	Chr1	27499034	27502055	0.728275	0.703478	14200	interaction137083	1-27504000	+	1788	1-27500000	+	2580	3757	142	0.069862	-571.792088	0	70	0.069862	7000	-233.879611	980	1532	-32.6618	7200	-214	-0.4081672760591	0.00411255890296952	-1.18078972028145	8.34415727925981e-09
9794000	9796000	AT1G28090	yes	Chr1	9795761	9799063	0.992724	0.786344	9788000	9790000	AT1G28080	yes	Chr1	9789825	9791546	4.68887	3.91843	6500	interaction51308	1-9794000	+	1939	1-9788000	+	1239	5382	65	0.069862	-211.984726	0	21	0.069862	2100	-46.674734	950	566	-32.6513	4400	-78	0.430166779508254	0.00270282277220748	-2.77461110331716	9.0744967204905e-20
18612000	18614000	AT3G50200	yes	Chr3	18612461	18613323	1.51389	1.10633	18610000	18612000	AT3G50190	yes	Chr3	18609113	18611169	1.31024	1.10627	9000	interaction349035	3-18612000	+	2153	3-18610000	+	985	1963	90	0.069862	-323.246745	0	36	0.069862	3600	-97.776197	1028	562	-32.6256	5400	-120	-2.65113299646334	3.50788816178274e-13	-1.99317196854829	5.7859369737848e-07
22114000	22116000	AT1G60030	yes	Chr1	22113840	22116845	0.726029	0.69971	22090000	22092000	AT1G59990	NA	Chr1	22090237	22093060	0.706366	0.625538	5800	interaction108984	1-22114000	+	2756	1-22090000	+	1398	23953	58	0.069862	-182.597716	0	17	0.069862	1700	-34.598674	1822	806	-32.5741	4100	-68	-0.850003801282541	0.000470153838874093	1.82883937953493	3.4874903137483e-33
29994000	29996000	AT1G79710	NA	Chr1	29995115	29998058	0.685862	0.691902	29986000	29988000	AT1G79690	NA	Chr1	29985175	29990388	0.789782	0.699447	4600	interaction149321	1-29994000	+	1805	1-29986000	+	1833	8024	46	0.069862	-134.484693	0	11	0.069862	1100	-18.463217	985	964	-32.5484	3500	-50	-0.749158695294732	0.000194239313223103	-0.464030020623621	2.52578331897724e-07
11946000	11948000	AT4G22745	NA	Chr4	11947312	11948757	0.700362	0.708973	11944000	11946000	AT4G22740	NA	Chr4	11943848	11945956	0.71863	0.733288	9000	interaction433960	4-11946000	+	1038	4-11944000	+	1616	2812	90	0.069862	-323.030598	0	36	0.069862	3600	-97.671066	621	779	-32.542	5400	-120	0.905701511692571	0.00280582824494733	0.416829313909123	4.37258910185371e-05
18160000	18162000	AT2G43850	NA	Chr2	18159181	18162044	0.777506	0.790574	18156000	18158000	AT2G43840	NA	Chr2	18157637	18159231	0.56647	0.664064	6800	interaction244518	2-18160000	+	2292	2-18156000	+	813	4073	68	0.069862	-225.742884	0	23	0.069862	2300	-53.164156	1248	394	-32.5378	4500	-84	-0.6765143731138	1.65655075607756e-06	-1.44927289610424	1.12565970793102e-06
27772000	27774000	AT1G73860	yes	Chr1	27770985	27776857	0.722518	0.814391	27768000	27770000	AT1G73850	yes	Chr1	27767262	27770457	2.61391	1.9599	15010.841935	interaction138421	1-27772000	+	3547	1-27768000	+	1705	3904	163	0.075862	-679.648885	0	78	0.069862	7800	-269.684639	2381	802	-32.4954	7210.84	-254	-3.8120104673968	1.94631516690857e-28	-1.07258762185463	3.03703968290071e-17
6722000	6724000	AT3G19390	yes	Chr3	6722988	6725027	0.806363	0.735539	6712000	6714000	AT3G19370	NA	Chr3	6710719	6713650	0.662225	0.716302	3900	interaction287443	3-6722000	+	1215	3-6712000	+	2368	10350	39	0.069862	-108.191982	0	8	0.069862	800	-11.524107	600	1222	-32.475	3100	-40	-3.91820116023869	5.32020210646779e-17	-1.9928623222002	1.47868852809261e-111
12374000	12376000	AT1G34040	yes	Chr1	12374432	12376179	0.746236	0.70547	12370000	12372000	AT1G34030	yes	Chr1	12370064	12371553	0.774369	0.767544	5800	interaction64642	1-12374000	+	1833	1-12370000	+	1514	3604	58	0.069862	-182.50776	0	17	0.069862	1700	-34.584362	898	890	-32.4749	4100	-68	-4.95364494863357	1.25240226457926e-38	-0.303631264827702	1.54185902672177e-05
8658000	8660000	AT5G25110	yes	Chr5	8657625	8659322	3.1444	3.14663	8648000	8650000	AT5G25100	yes	Chr5	8648005	8651176	0.709998	0.827038	5803.892365	interaction513991	5-8658000	+	1913	5-8648000	+	3110	9607	62	0.07463	-198.817809	0	17	0.069862	1700	-34.5757	950	1775	-32.4151	4103.89	-74	-3.7688769369665	1.28642345889444e-57	-0.257566041835068	0.0274886728377645
17676000	17678000	AT5G43930	NA	Chr5	17676815	17681100	0.777427	0.680197	17668000	17670000	AT5G43910	NA	Chr5	17667309	17670239	0.716801	0.756957	3400	interaction558262	5-17676000	+	1532	5-17668000	+	1089	8456	34	0.069862	-90.042495	0	6	0.069862	600	-7.447304	883	546	-32.3995	2800	-32	-0.255474970263078	0.0214550984465558	-1.80741458920482	2.22620606969648e-14
4308000	4310000	AT5G13440	NA	Chr5	4308128	4310181	0.760328	0.762312	4306000	4308000	AT5G13430	NA	Chr5	4305124	4307513	0.785829	0.699269	10900	interaction490823	5-4308000	+	1504	5-4306000	+	1584	1915	109	0.069862	-410.552881	0	48	0.069862	4800	-143.096544	827	766	-32.3313	6100	-152	-0.784964370567805	0.000184138094331955	-0.82446869030087	2.33847383471818e-15
2692000	2694000	AT5G08370	yes	Chr5	2690878	2693550	0.783897	0.634645	2688000	2690000	AT5G08360	yes	Chr5	2689712	2690974	2.12211	0.680688	13800	interaction482311	5-2692000	+	2446	5-2688000	+	1328	3035	138	0.069862	-553.611589	0	68	0.069862	6800	-225.981703	1408	751	-32.3256	7000	-206	2.24302621384536	1.22504031504488e-41	-1.05926359696325	0.00135511790261129
9358000	9360000	AT4G16620	NA	Chr4	9358116	9360060	0.649528	0.650859	9354000	9356000	AT4G16610	NA	Chr4	9354320	9355287	0.70673	0.702895	10700	interaction421275	4-9358000	+	1909	4-9354000	+	1161	4050	107	0.069862	-402.189789	0	47	0.069862	4700	-139.280911	1135	707	-32.3018	6000	-150	-1.58424682805697	4.38339655430636e-08	-2.58434435902405	1.94741212207381e-11
15332000	15334000	AT5G38360	yes	Chr5	15331710	15333625	0.762562	0.782041	15322000	15324000	AT5G38340	yes	Chr5	15320506	15324061	1.298	1.944	3400	interaction546506	5-15332000	+	1208	5-15322000	+	1937	9339	34	0.069862	-89.993681	0	6	0.069862	600	-7.444037	659	974	-32.2827	2800	-32	1.69723074719322	1.3302265300537e-35	-3.27133690712412	2.50842584532467e-79
19618000	19620000	AT5G48400	yes	Chr5	19616243	19619246	0.663021	0.857123	19608000	19610000	AT5G48385	NA	Chr5	19608559	19612007	0.771104	0.832614	5400	interaction568052	5-19618000	+	2686	5-19608000	+	1715	9460	54	0.069862	-166.114354	0	15	0.069862	1500	-28.935296	1263	917	-32.2797	3900	-62	-3.12326416858058	7.02204163782907e-07	-0.251559412612663	0.00839182807578047
1060000	1062000	AT3G04070	yes	Chr3	1061525	1063103	2.57636	1.53178	1054000	1056000	AT3G04060	yes	Chr3	1053365	1055163	3.77693	3.14007	4100	interaction257446	3-1060000	+	934	3-1054000	+	1604	6267	41	0.069862	-115.858704	0	9	0.069862	900	-13.761248	449	644	-32.2771	3200	-42	-1.92024548902601	1.27687684925199e-07	-2.996004228455	9.56971445402945e-14
17572000	17574000	AT4G37380	yes	Chr4	17572039	17573938	0.693542	0.706202	17570000	17572000	AT4G37370	NA	Chr4	17569827	17571704	0.722844	0.655204	21497.980376	interaction463428	4-17572000	+	2614	4-17570000	+	2993	2014	302	0.098142	-1445.302568	0	125	0.069862	12500	-488.941162	1298	1626	-32.2737	8997.98	-540	1.11136303432644	7.77866875024051e-06	1.77299318243259	5.00123921415177e-05
11064000	11066000	AT2G25940	yes	Chr2	11063300	11066028	0.829795	0.801211	11060000	11062000	AT2G25930	NA	Chr2	11059034	11063324	0.757152	0.70145	15100	interaction206982	2-11064000	+	1558	2-11060000	+	2631	3675	151	0.069862	-618.449789	0	77	0.069862	7700	-264.984493	857	1452	-32.2667	7400	-230	-3.24221592195652	3.60756754733312e-49	-0.47526027296208	0.000885849794893803
19098000	19100000	AT1G51500	yes	Chr1	19097796	19101080	1.22652	1.30997	19092000	19094000	AT1G51480	yes	Chr1	19090846	19094306	2.76558	3.75955	10300	interaction94435	1-19098000	+	2822	1-19092000	+	1693	5993	103	0.069862	-381.711922	0	44	0.069862	4400	-127.229373	1760	982	-32.2611	5900	-142	4.14053065196747	6.59632626835703e-180	-6.29453304570281	3.19735494522318e-11
6550000	6552000	AT3G18990	NA	Chr3	6548868	6551853	0.624328	0.735821	6546000	6548000	AT3G18980	yes	Chr3	6546462	6548062	0.827557	0.933957	10700	interaction286511	3-6550000	+	1210	3-6546000	+	2277	3741	107	0.069862	-401.982954	0	47	0.069862	4700	-139.571183	595	1498	-32.2317	6000	-150	-0.674869019481267	4.34521017282226e-07	1.4432359887297	1.34731996546789e-11
7228000	7230000	AT4G12060	yes	Chr4	7228006	7229941	1.0721	0.743913	7220000	7222000	AT4G12050	yes	Chr4	7219823	7221328	4.68614	2.46599	7500	interaction409930	4-7228000	+	1139	4-7220000	+	3448	8175	75	0.069862	-255.303864	0	27	0.069862	2700	-66.175492	507	1286	-32.2258	4800	-94	2.23504732398478	1.73079646729978e-63	-5.58782947584021	6.00496191305002e-39
11486000	11488000	AT4G21600	yes	Chr4	11485118	11487416	1.17732	0.792761	11480000	11482000	AT4G21590	NA	Chr4	11480343	11482719	0.676729	0.734861	8100	interaction431691	4-11486000	+	2362	4-11480000	+	1980	5303	81	0.069862	-280.674139	0	30	0.069862	3000	-75.973044	1183	1180	-32.2117	5100	-104	-4.63866942195683	1.85451172127965e-28	-1.8219653811086	0.000221726077496109
18524000	18526000	AT4G39950	yes	Chr4	18525245	18527579	3.79967	3.50424	18520000	18522000	AT4G39940	yes	Chr4	18519716	18521568	2.25493	1.8583	9200	interaction468049	4-18524000	+	1805	4-18520000	+	1878	4526	92	0.069862	-330.483645	0	37	0.069862	3700	-100.984745	961	939	-32.198	5500	-122	-2.21336631339298	1.09048411276042e-15	0.719330529727856	0.0111520707230954
29486000	29488000	AT1G78380	yes	Chr1	29486412	29487906	0.735797	0.821028	29482000	29484000	AT1G78360	yes	Chr1	29482069	29482966	1.37237	1.53327	13000	interaction146745	1-29486000	+	1906	1-29482000	+	2070	3849	130	0.069862	-511.560151	0	62	0.069862	6200	-199.810818	955	970	-32.1946	6800	-190	-0.608155786940152	0.00376162338145741	-3.90843433141634	1.0182252919455e-13
19850000	19852000	AT5G48960	NA	Chr5	19849542	19853564	0.714721	0.679423	19840000	19842000	AT5G48940	yes	Chr5	19839709	19843807	0.821914	0.68261	5200	interaction569135	5-19850000	+	1979	5-19840000	+	2586	10287	52	0.069862	-157.992185	0	14	0.069862	1400	-26.19914	1029	1407	-32.177	3800	-58	0.928092667092089	1.22949806110095e-15	-4.86915318114557	1.38228631066242e-25
14544000	14546000	AT4G29700	yes	Chr4	14543456	14545138	1.30722	1.1655	14540000	14542000	AT4G29690	yes	Chr4	14540906	14542481	1.04387	0.831829	12400	interaction448182	4-14544000	+	2043	4-14540000	+	1765	3379	124	0.069862	-482.39234	0	58	0.069862	5800	-183.157735	949	949	-32.1764	6600	-180	-2.86228262494575	1.3637003580657e-11	-5.70937559858174	7.9272254959903e-31
20528000	20530000	AT5G50410	NA	Chr5	20528198	20529827	0.927181	0.731652	20524000	20526000	AT5G50400	NA	Chr5	20523574	20526469	0.660738	0.672454	11500	interaction573154	5-20528000	+	1691	5-20524000	+	2400	4122	115	0.069862	-438.850506	0	52	0.069862	5200	-158.726654	939	1359	-32.1504	6300	-164	0.385172145687543	0.0436639229095591	-0.766225213250902	3.48309250283406e-06
22836000	22838000	AT1G61820	yes	Chr1	22835077	22838615	2.42394	1.35935	22832000	22834000	AT1G61810	yes	Chr1	22830014	22834728	2.15741	1.28073	2500	interaction113041	1-22836000	+	1605	1-22832000	+	576	4677	25	0.069862	-59.451917	0	3	0.069862	300	-2.526315	682	265	-32.1193	2200	-22	-3.01394948328043	1.96511552452776e-28	-2.20305351312886	6.01289213352499e-34
21222000	21224000	AT5G52270	yes	Chr5	21221642	21222600	1.81972	1.40605	21218000	21220000	AT5G52250	yes	Chr5	21216854	21218226	1.17351	1.75848	4500	interaction576340	5-21222000	+	1615	5-21218000	+	629	3713	45	0.069862	-131.645132	0	11	0.069862	1100	-18.54244	998	363	-32.0945	3400	-48	-1.98810318773291	1.49537211729054e-05	1.20360794490166	3.50631763794022e-05
8084000	8086000	AT3G22840	yes	Chr3	8084446	8085560	3.93679	2.78587	8078000	8080000	AT3G22830	yes	Chr3	8078819	8081051	3.56394	2.61835	4100	interaction295088	3-8084000	+	1488	3-8078000	+	1344	5748	41	0.069862	-115.59705	0	9	0.069862	900	-13.750444	658	540	-32.0864	3200	-42	-1.46425272648064	0.0264050299675886	-4.17564479592264	2.66735395612765e-14
26594000	26596000	AT5G66630	yes	Chr5	26592647	26595922	0.713959	0.873075	26590000	26592000	AT5G66620	yes	Chr5	26588584	26592006	0.679969	0.764461	11600	interaction602997	5-26594000	+	2038	5-26590000	+	1369	3837	116	0.069862	-444.635935	0	53	0.069862	5300	-163.051759	1233	781	-32.0407	6300	-166	-2.42091516094525	2.09763296273467e-07	-1.6517469417637	3.42083701936869e-08
29130000	29132000	AT1G77520	yes	Chr1	29130402	29132180	1.76783	1.33697	29126000	29128000	AT1G77510	NA	Chr1	29126649	29129612	0.83246	0.808645	12800	interaction145231	1-29130000	+	2308	1-29126000	+	1619	3617	128	0.069862	-502.477153	0	61	0.069862	6100	-195.936106	1015	821	-31.995	6700	-188	-5.28121075733867	3.09873299329769e-17	-0.786429561829928	7.09902770736223e-08
19620000	19622000	AT5G48410	yes	Chr5	19620266	19623425	0.642752	0.875924	19618000	19620000	AT5G48400	yes	Chr5	19616243	19619246	0.663021	0.857123	14341.678789	interaction568071	5-19620000	+	2559	5-19618000	+	2686	2334	177	0.086222	-749.843483	0	72	0.069862	7200	-241.971807	1431	1263	-31.9947	7141.68	-280	-3.84877710075767	1.06567923477401e-18	-3.12326416858058	7.02204163782907e-07
9314000	9316000	AT2G21850	yes	Chr2	9315217	9318238	1.18504	0.847278	9310000	9312000	AT2G21840	yes	Chr2	9307059	9310058	1.52404	1.44172	3100	interaction198065	2-9314000	+	1509	2-9310000	+	678	3970	31	0.069862	-79.713278	0	5	0.069862	500	-5.626243	718	397	-31.9879	2600	-28	-3.82975346595859	8.23223626594683e-52	-4.9491992295926	6.84443166327618e-73
1888000	1890000	AT5G06240	NA	Chr5	1888310	1889698	0.868723	0.751478	1886000	1888000	AT5G06230	yes	Chr5	1884927	1887121	1.1945	1.22701	11500	interaction478042	5-1888000	+	1945	5-1886000	+	2108	2141	115	0.069862	-438.330623	0	52	0.069862	5200	-158.609629	1024	1079	-31.9849	6300	-164	0.408092843938037	0.00991760717652884	-3.08762028449837	1.14701589934933e-19
7922000	7924000	AT1G22440	yes	Chr1	7922427	7924944	2.26138	0.974418	7920000	7922000	AT1G22430	yes	Chr1	7919143	7921832	1.05008	1.09936	9400	interaction41482	1-7922000	+	971	1-7920000	+	1269	1691	94	0.069862	-341.808697	0	39	0.069862	3900	-109.248845	442	694	-31.9467	5500	-128	-5.47065579546019	1.85607692363632e-30	2.77394692133313	2.09902126372302e-46
21332000	21334000	AT1G57600	NA	Chr1	21330511	21334727	0.778056	0.715122	21328000	21330000	AT1G57590	yes	Chr1	21327359	21329763	0.813036	0.912286	13400	interaction105547	1-21332000	+	1864	1-21328000	+	1830	3935	134	0.069862	-531.591476	0	65	0.069862	6500	-211.979294	1243	1287	-31.9275	6900	-198	-0.523021127609593	2.34009095895288e-05	-3.90101415395553	1.87616987632127e-07
22642000	22644000	AT1G61370	NA	Chr1	22642095	22645147	0.672252	0.639721	22640000	22642000	AT1G61360	NA	Chr1	22637727	22641825	0.658091	0.655568	14100	interaction111987	1-22642000	+	1765	1-22640000	+	1949	2067	141	0.069862	-566.829578	0	70	0.069862	7000	-233.797673	1013	1026	-31.9269	7100	-212	-1.9328851201343	4.39052268633757e-13	-1.80019809284181	4.21621427708871e-07
19358000	19360000	AT1G52060	yes	Chr1	19359038	19360675	2.82316	3.36325	19354000	19356000	AT1G52050	yes	Chr1	19354918	19356764	3.08597	3.54472	7000	interaction95845	1-19358000	+	1149	1-19354000	+	1929	4201	70	0.069862	-233.510742	0	24	0.069862	2400	-56.082152	758	1261	-31.8806	4600	-86	-5.14933175018769	2.39862909990523e-13	-5.2397057101088	1.08553216977369e-22
20234000	20236000	AT5G49800	yes	Chr5	20234641	20236184	2.31552	2.17683	20228000	20230000	AT5G49780	yes	Chr5	20229255	20233095	1.73014	2.20718	9800	interaction571378	5-20234000	+	1988	5-20228000	+	2463	5820	98	0.069862	-357.911294	0	41	0.069862	4100	-115.801081	1001	1352	-31.8565	5700	-134	0.505224059118484	0.0041677806283693	-3.87017635664351	1.65165135046626e-31
7846000	7848000	AT2G18050	yes	Chr2	7845922	7846884	3.9216	4.32238	7842000	7844000	AT2G18040	NA	Chr2	7842163	7843870	0.925759	0.92607	13200	interaction190346	2-7846000	+	2457	2-7842000	+	1519	3683	132	0.069862	-522.660986	0	64	0.069862	6400	-208.464754	1323	867	-31.8386	6800	-194	-1.89214867763875	0.00465922918750063	-0.497562677848328	1.57924394519704e-07
19254000	19256000	AT1G51850	yes	Chr1	19252846	19256783	1.8269	2.22887	19244000	19246000	AT1G51830	yes	Chr1	19243024	19246010	2.23464	2.32675	4100	interaction95147	1-19254000	+	1860	1-19244000	+	1351	9864	41	0.069862	-115.593977	0	9	0.069862	900	-13.735564	1109	750	-31.8275	3200	-42	-2.49074814184352	7.10242737769867e-09	-5.56694922917198	4.51836677937221e-59
16680000	16682000	AT4G35040	yes	Chr4	16680322	16682093	0.751523	0.733971	16678000	16680000	AT4G35030	yes	Chr4	16675701	16678206	1.30525	1.2059	4900	interaction459173	4-16680000	+	1495	4-16678000	+	955	2567	49	0.069862	-146.748569	0	13	0.069862	1300	-23.643182	720	408	-31.8178	3600	-54	-1.18428631092697	3.5407055686891e-09	-2.42640745640164	2.02879450623542e-11
3352000	3354000	AT3G10710	yes	Chr3	3352288	3354237	0.87834	0.851979	3350000	3352000	AT3G10700	NA	Chr3	3346577	3351023	0.714337	0.636831	20064.698931	interaction269534	3-3352000	+	2865	3-3350000	+	2393	2023	247	0.086002	-1131.541882	0	114	0.069862	11400	-434.421759	1768	1540	-31.8156	8664.7	-424	-5.8304765001337	1.00336511795181e-35	0.394179410820637	0.0101893644558103
8752000	8754000	AT4G15330	yes	Chr4	8751386	8753157	3.71587	4.2347	8718000	8720000	AT4G15280	yes	Chr4	8719181	8720618	4.00518	4.35943	1800	interaction417598	4-8752000	+	1238	4-8718000	+	2574	33443	18	0.069862	-37.452323	0	1	0.069862	100	-0.458124	528	1425	-31.8134	1700	-14	-5.65947692352616	3.469458457868e-28	-2.99188020341154	2.81384028408845e-07
20016000	20018000	AT1G53633	yes	Chr1	20017388	20017932	2.21363	1.67168	20014000	20016000	AT1G53625	yes	Chr1	20014409	20014923	1.1717	0.696855	10300	interaction98978	1-20016000	+	1356	1-20014000	+	957	1317	103	0.069862	-384.194628	0	45	0.069862	4500	-133.003674	624	342	-31.7872	5800	-144	-2.98360154334858	3.96603558161031e-07	-2.72432405489677	1.32480057467823e-05
9920000	9922000	AT4G17840	NA	Chr4	9918051	9920475	0.815297	0.773798	9892000	9894000	AT4G17790	yes	Chr4	9891050	9892807	0.926942	0.860493	1800	interaction424055	4-9920000	+	1483	4-9892000	+	1828	27717	18	0.069862	-37.433939	0	1	0.069862	100	-0.458237	745	665	-31.7714	1700	-14	2.33873099914974	2.90554980766925e-17	-0.90356651290358	1.57404154497364e-22
1464000	1466000	AT5G04970	yes	Chr5	1464144	1467041	3.39603	4.01648	1460000	1462000	AT5G04960	yes	Chr5	1461906	1463969	3.6859	4.61782	12168.790395	interaction475660	5-1464000	+	2370	5-1460000	+	2607	3557	135	0.077505	-535.411337	0	57	0.069862	5700	-178.7965	1106	1158	-31.7622	6468.79	-200	-5.86885689062047	2.23497411602966e-22	-5.82167768276479	2.4588457003866e-28
23820000	23822000	AT1G64180	NA	Chr1	23821515	23824359	0.683512	0.678845	23818000	23820000	AT1G64170	NA	Chr1	23815238	23818293	0.799523	0.8976	4300	interaction118102	1-23820000	+	1392	1-23818000	+	1048	2362	43	0.069862	-123.343994	0	10	0.069862	1000	-16.077405	702	543	-31.7587	3300	-46	0.486552808206988	0.000643324946265075	-1.33848077970143	0.00340944535872294
17366000	17368000	AT2G41660	yes	Chr2	17367821	17369189	2.72963	1.23752	17364000	17366000	AT2G41650	yes	Chr2	17363906	17364434	0.835834	0.867034	18600	interaction240290	2-17366000	+	1782	2-17364000	+	1897	1764	186	0.069862	-800.420715	0	103	0.069862	10300	-384.225145	952	1092	-31.7311	8300	-300	-5.10928586630417	1.61398043736491e-42	-0.508323994334748	0.0399642235741267
11078000	11080000	AT2G25980	yes	Chr2	11077487	11079918	1.56442	1.81405	11074000	11076000	AT2G25970	NA	Chr2	11071650	11075669	0.849819	0.791769	11900	interaction207048	2-11078000	+	1941	2-11074000	+	1740	3520	119	0.069862	-458.078886	0	55	0.069862	5500	-171.135376	989	803	-31.7261	6400	-170	-5.36389503778318	3.03703968290071e-17	0.24378676083674	0.0162657701370461
18656000	18658000	AT2G45240	NA	Chr2	18655938	18659077	0.698089	0.629506	18646000	18648000	AT2G45220	yes	Chr2	18644083	18646447	3.80827	3.51542	2500	interaction246965	2-18656000	+	2224	2-18646000	+	1154	10006	25	0.069862	-59.20586	0	3	0.069862	300	-2.52428	1194	497	-31.7247	2200	-22	-0.28665047979843	0.000917630752637609	-3.87216636001235	3.92521134248721e-60
8812000	8814000	AT4G15400	yes	Chr4	8811927	8813478	3.24368	4.65561	8750000	8752000	AT4G15330	yes	Chr4	8751386	8753157	3.71587	4.2347	1754.931862	interaction418189	4-8812000	+	2969	4-8750000	+	1924	61640	18	0.071657	-37.412686	0	1	0.069862	100	-0.458383	1598	997	-31.7178	1654.93	-14	-5.75453877517314	3.78425722407549e-30	-5.65947692352616	3.469458457868e-28
16182000	16184000	AT4G33720	yes	Chr4	16182751	16183533	3.21025	4.34794	16178000	16180000	AT4G33700	yes	Chr4	16176275	16179481	0.866391	0.74193	9600	interaction456692	4-16182000	+	1945	4-16178000	+	1544	3376	96	0.069862	-349.324029	0	40	0.069862	4000	-112.17754	1025	855	-31.7101	5600	-130	-5.35880208769846	4.71292396416892e-16	-0.582359741011658	3.15034963004647e-07
22274000	22276000	AT5G54830	NA	Chr5	22273069	22276301	0.755524	0.722668	22260000	22262000	AT5G54800	yes	Chr5	22261270	22263921	1.82813	0.736815	2500	interaction581603	5-22274000	+	1832	5-22260000	+	1285	13711	25	0.069862	-59.181077	0	3	0.069862	300	-2.523962	982	576	-31.6642	2200	-22	-0.744323088175854	3.82854051934537e-05	-1.59998239288612	1.62014259485992e-53
8392000	8394000	AT4G14630	yes	Chr4	8392840	8393813	1.8663	1.84703	8380000	8382000	AT4G14605	NA	Chr4	8378428	8380714	0.758401	0.723243	3100	interaction415736	4-8392000	+	1650	4-8380000	+	1290	12407	31	0.069862	-79.400944	0	5	0.069862	500	-5.619247	799	707	-31.636	2600	-28	-5.66943996821178	3.41771301237586e-19	1.75593300127724	1.50506018269199e-21
13992000	13994000	AT2G32970	NA	Chr2	13991447	13995749	0.841082	0.725861	13988000	13990000	AT2G32960	yes	Chr2	13987766	13990976	1.93981	1.82407	8300	interaction222218	2-13992000	+	1813	2-13988000	+	1415	3531	83	0.069862	-290.276631	0	32	0.069862	3200	-83.185801	1073	718	-31.6352	5100	-108	0.611790009851071	0.00234306502474522	-1.01007452672351	5.77957691829113e-11
18526000	18528000	AT3G49970	yes	Chr3	18527215	18529066	0.920529	1.09209	18522000	18524000	AT3G49950	yes	Chr3	18522509	18523906	3.53849	5.06876	11100	interaction348605	3-18526000	+	1333	3-18522000	+	2595	3954	111	0.069862	-420.653123	0	50	0.069862	5000	-151.151601	712	1486	-31.6301	6100	-156	7.56745816026061	4.13483000194839e-12	4.56923900756242	3.17613317516941e-14
11778000	11780000	AT2G27590	NA	Chr2	11777553	11779851	0.719617	0.728914	11772000	11774000	AT2G27550	yes	Chr2	11773250	11774681	3.36034	3.58528	4300	interaction210526	2-11778000	+	1882	2-11772000	+	1213	5235	43	0.069862	-123.229143	0	10	0.069862	1000	-16.068121	1062	629	-31.6233	3300	-46	-0.619678061421925	5.37535068938159e-05	-5.14187608912606	7.90650367969797e-131
14294000	14296000	AT2G33790	yes	Chr2	14293560	14295271	3.93656	4.37501	14280000	14282000	AT2G33770	NA	Chr2	14277557	14283040	0.657704	0.691531	3100	interaction223966	2-14294000	+	1750	2-14280000	+	2592	14147	31	0.069862	-79.310897	0	5	0.069862	500	-5.618894	736	1267	-31.6185	2600	-28	-6.01611674207717	2.00087111638882e-31	-1.03287639756725	0.000233179870309737
8632000	8634000	AT2G20000	NA	Chr2	8632077	8637300	0.870788	0.755636	8630000	8632000	AT2G19990	yes	Chr2	8629983	8630688	3.53881	4.30888	12900	interaction194447	2-8632000	+	1648	2-8630000	+	1726	1904	129	0.069862	-507.325418	0	62	0.069862	6200	-200.059338	976	850	-31.6139	6700	-190	0.325994166525267	0.0363002968467383	-1.38795178157872	0.000348330279134675
20340000	20342000	AT1G54460	NA	Chr1	20340599	20343530	0.870623	0.828409	20336000	20338000	AT1G54450	yes	Chr1	20336339	20339535	1.2216	1.44307	8600	interaction100402	1-20340000	+	1221	1-20336000	+	2143	3894	86	0.069862	-304.20602	0	34	0.069862	3400	-90.385303	646	1207	-31.5426	5200	-114	-0.269218207538033	0.0262178520867089	-1.11861487791965	5.19405699296916e-05
16082000	16084000	AT5G40240	NA	Chr5	16082124	16084810	0.639602	0.654561	16080000	16082000	AT5G40230	NA	Chr5	16079647	16081735	0.546392	0.610874	8900	interaction550197	5-16082000	+	1059	5-16080000	+	1139	1003	89	0.069862	-318.364352	0	36	0.069862	3600	-97.694123	607	632	-31.5364	5300	-118	-0.989174946724831	3.21733696372082e-06	-3.39547788788826	2.92910694403254e-38
19980000	19982000	AT5G49290	NA	Chr5	19980194	19983869	0.697057	0.702459	19970000	19972000	AT5G49270	yes	Chr5	19971908	19974444	2.20091	2.41651	2500	interaction569931	5-19980000	+	1557	5-19970000	+	1691	9905	25	0.069862	-59.143016	0	3	0.069862	300	-2.52324	914	902	-31.5278	2200	-22	-0.873397968630851	3.9750595726227e-05	-5.69227838029045	1.26009629022159e-77
7080000	7082000	AT5G20870	NA	Chr5	7079974	7081769	0.614903	0.675295	7076000	7078000	AT5G20860	yes	Chr5	7076889	7079077	1.77742	2.45635	14400	interaction505773	5-7080000	+	2713	5-7076000	+	1346	3321	144	0.069862	-583.881362	0	73	0.069862	7300	-247.913854	1432	724	-31.5178	7100	-218	-0.85368148497575	0.0294228458876918	-4.65968224684173	7.90937756039344e-16
4848000	4850000	AT1G14180	NA	Chr1	4847161	4849207	0.717262	0.644963	4844000	4846000	AT1G14170	NA	Chr1	4843233	4845847	0.823792	0.999663	10700	interaction25362	1-4848000	+	2394	1-4844000	+	2201	3815	107	0.069862	-399.810717	0	47	0.069862	4700	-138.742471	1237	1094	-31.5049	6000	-148	0.70128890925403	3.24252131602754e-05	-1.68783900200605	2.20727368999618e-08
6922000	6924000	AT3G19900	NA	Chr3	6922566	6925066	0.934954	0.850675	6920000	6922000	AT3G19895	yes	Chr3	6917293	6921556	0.977429	0.996794	9900	interaction288557	3-6922000	+	1705	3-6920000	+	1970	2127	99	0.069862	-362.968539	0	42	0.069862	4200	-119.749681	834	1118	-31.4911	5700	-136	1.56441354417132	2.89323868314059e-13	-0.512797343696886	2.9375905926053e-05
19946000	19948000	AT3G53840	yes	Chr3	19945570	19947719	0.830154	0.899774	19942000	19944000	AT3G53830	NA	Chr3	19940813	19943799	0.801591	0.707594	11000	interaction355794	3-19946000	+	2129	3-19942000	+	2221	4314	110	0.069862	-414.128181	0	49	0.069862	4900	-146.539749	1198	1152	-31.4848	6100	-154	-0.986037693173714	0.0470960118013918	2.65941638010249	1.0280114012489e-12
796000	798000	AT4G01850	NA	Chr4	796096	798286	0.635836	0.669275	792000	794000	AT4G01840	NA	Chr4	793260	795139	0.669651	0.783715	5600	interaction378053	4-796000	+	2159	4-792000	+	629	3185	56	0.069862	-175.772056	0	17	0.069862	1700	-34.936098	1126	253	-31.4759	3900	-64	-0.778153860840848	4.05922811301713e-12	0.633027000741835	5.6706664707764e-05
4716000	4718000	AT1G13750	NA	Chr1	4715393	4718235	0.627074	0.588677	4702000	4704000	AT1G13710	yes	Chr1	4702724	4704657	4.07401	5.84256	3100	interaction24689	1-4716000	+	2589	1-4702000	+	2129	13865	31	0.069862	-79.266094	0	5	0.069862	500	-5.615924	1482	1126	-31.472	2600	-28	-1.02690967910244	8.34503410976629e-14	2.09061698716436	1.61341660046047e-12
19490000	19492000	AT5G48100	yes	Chr5	19489326	19492744	2.21357	1.38589	19484000	19486000	AT5G48090	yes	Chr5	19484164	19488657	0.676323	0.745789	7600	interaction567274	5-19490000	+	1164	5-19484000	+	2894	5475	76	0.069862	-259.647201	0	28	0.069862	2800	-69.541009	522	1612	-31.4659	4800	-96	-5.19492245856184	3.79856900323862e-13	-2.02343827240144	6.82063982250474e-06
12564000	12566000	AT5G33300	NA	Chr5	12562429	12565757	0.572545	0.549908	12560000	12562000	AT5G33290	NA	Chr5	12558255	12562020	0.828241	0.761547	9200	interaction534105	5-12564000	+	1022	5-12560000	+	1262	3571	92	0.069862	-332.309782	0	38	0.069862	3800	-105.124539	577	650	-31.445	5400	-124	-0.938382814094134	0.00376191204513977	-1.59930011888861	6.06485052149132e-10
22808000	22810000	AT1G61760	yes	Chr1	22807439	22808114	2.14272	3.79116	22804000	22806000	AT1G61750	yes	Chr1	22804612	22806318	4.20322	4.57298	5600	interaction112917	1-22808000	+	674	1-22804000	+	2017	3208	56	0.069862	-175.604454	0	17	0.069862	1700	-34.829458	322	836	-31.3887	3900	-64	-1.0627837921042	0.000675468637501596	-5.49538032540639	1.03122944766999e-14
12874000	12876000	AT2G30150	NA	Chr2	12874705	12876122	0.66804	0.682909	12868000	12870000	AT2G30130	yes	Chr2	12868629	12869724	4.86214	5.17513	3600	interaction216398	2-12874000	+	1858	2-12868000	+	1688	5853	36	0.069862	-97.047722	0	7	0.069862	700	-9.416328	1073	683	-31.3863	2900	-36	1.89265305789266	7.83054418788876e-43	-5.33588114225639	2.87498107775902e-09
25072000	25074000	AT5G62440	NA	Chr5	25072467	25073991	0.761403	0.690912	25064000	25066000	AT5G62420	yes	Chr5	25064834	25066111	1.22753	1.85318	4300	interaction595870	5-25072000	+	1498	5-25064000	+	2558	8032	43	0.069862	-123.090962	0	10	0.069862	1000	-16.050248	906	1341	-31.3659	3300	-46	-0.720185954616937	1.44547718395674e-05	-3.98787344742703	1.3518596184633e-10
24786000	24788000	AT1G66450	yes	Chr1	24786199	24788302	1.45554	1.53561	24782000	24784000	AT1G66440	yes	Chr1	24782170	24784351	1.91077	2.35922	3300	interaction123345	1-24786000	+	539	1-24782000	+	1588	3506	33	0.069862	-86.965983	0	6	0.069862	600	-7.467925	263	654	-31.3416	2700	-32	-3.47082163553178	2.413108168921e-24	-6.15921463922013	2.69479729087011e-22
25448000	25450000	AT1G67870	yes	Chr1	25449366	25451012	2.04769	2.92002	25446000	25448000	AT1G67865	yes	Chr1	25446288	25446737	4.59849	4.99231	12700	interaction126970	1-25448000	+	1875	1-25446000	+	1501	1416	127	0.069862	-497.948801	0	61	0.069862	6100	-196.216809	1038	731	-31.3222	6600	-186	0.708948569267795	0.00969354006026213	4.09424911093281	9.60507238638465e-37
22686000	22688000	AT1G61490	NA	Chr1	22685153	22688267	0.481692	0.57372	22682000	22684000	AT1G61480	NA	Chr1	22681315	22684475	0.501	0.605463	17422.864832	interaction112232	1-22686000	+	2741	1-22682000	+	2519	3952	216	0.086612	-959.069973	0	95	0.069862	9500	-344.81215	1680	1486	-31.3141	7922.86	-358	-0.578743880137308	0.0422435758898071	-5.67910918128109	9.54534783760168e-37
11238000	11240000	AT2G26420	yes	Chr2	11239433	11242239	0.947223	1.14586	11236000	11238000	AT2G26410	yes	Chr2	11234650	11236936	1.44566	1.7633	4000	interaction207799	2-11238000	+	1857	2-11236000	+	580	2635	40	0.069862	-112.605922	0	9	0.069862	900	-13.796599	1141	290	-31.3069	3100	-42	-4.92488590371778	2.63272499330981e-25	-5.52542450217513	6.56274203445936e-21
1686000	1688000	AT2G04800	yes	Chr2	1687195	1687817	3.19594	0.89513	1676000	1678000	AT2G04780	NA	Chr2	1676741	1678455	0.697051	0.664727	3600	interaction159444	2-1686000	+	1807	2-1676000	+	1359	10050	36	0.069862	-97.134565	0	7	0.069862	700	-9.413188	859	793	-31.3053	2900	-36	-4.88181109358489	1.0807571343137e-39	-1.22536481549023	3.56311576948152e-39
5576000	5578000	AT5G16970	NA	Chr5	5576167	5578075	0.776158	1.02358	5574000	5576000	AT5G16960	yes	Chr5	5574280	5575910	0.712476	1.00983	30046.259815	interaction497508	5-5576000	+	2013	5-5574000	+	2965	1928	322	0.07487	-1569.210993	0	197	0.069862	19700	-865.126424	1207	1968	-31.2898	10346.3	-588	2.81879485657044	1.50446055552271e-56	3.41598226716865	0.000890726503578222
20994000	20996000	AT5G51670	NA	Chr5	20993536	20995644	0.736917	0.820859	20984000	20986000	AT5G51660	NA	Chr5	20980214	20989427	0.732761	0.682723	5500	interaction575172	5-20994000	+	1580	5-20984000	+	2575	9793	55	0.069862	-170.22642	0	16	0.069862	1600	-31.759081	720	1617	-31.2867	3900	-62	-1.23254686349878	4.00425284042123e-05	0.534489157383545	0.0010154991420499
17200000	17202000	AT2G41250	yes	Chr2	17200658	17202618	0.859755	0.861066	17198000	17200000	AT2G41240	yes	Chr2	17198281	17199320	1.4182	2.07831	9700	interaction239440	2-17200000	+	1925	2-17198000	+	1450	1781	97	0.069862	-354.162708	0	41	0.069862	4100	-116.033397	1188	777	-31.2646	5600	-132	1.28774042142085	9.1303015626118e-06	1.27926859520358	9.05957662095487e-07
5588000	5590000	AT3G16450	yes	Chr3	5588393	5590055	3.42818	3.68913	5562000	5564000	AT3G16390	yes	Chr3	5562570	5564571	3.09517	3.24975	2778.703849	interaction281235	3-5588000	+	2604	3-5562000	+	2540	25926	33	0.082969	-86.22099	0	4	0.069862	400	-3.967551	896	1060	-31.2624	2378.7	-32	-3.26200979429494	9.57923125397121e-16	-3.57997220945164	2.43644009285561e-18
17216000	17218000	AT3G46740	NA	Chr3	17215812	17219343	0.77691	0.720153	17208000	17210000	AT3G46710	yes	Chr3	17206488	17209032	1.40189	1.95431	4500	interaction341612	3-17216000	+	3593	3-17208000	+	1504	8146	45	0.069862	-130.737852	0	11	0.069862	1100	-18.476303	2014	756	-31.2578	3400	-48	1.26191259370369	1.10868881225035e-71	-5.86719044366497	4.37759501465536e-21
10084000	10086000	AT3G27300	NA	Chr3	10083048	10086696	0.790373	0.760478	10080000	10082000	AT3G27290	NA	Chr3	10079559	10081533	0.680418	0.69455	11700	interaction304666	3-10084000	+	2138	3-10080000	+	1805	4323	117	0.069862	-448.245724	0	54	0.069862	5400	-166.74923	1209	971	-31.2554	6300	-168	-1.41766757690241	5.33081570573359e-25	-1.79909644174079	4.63548098168877e-08
2838000	2840000	AT3G09250	NA	Chr3	2838999	2840614	0.781919	0.665428	2832000	2834000	AT3G09230	yes	Chr3	2833397	2835338	0.692479	0.630742	5100	interaction266527	3-2838000	+	1623	3-2832000	+	2375	5925	51	0.069862	-154.15352	0	14	0.069862	1400	-26.242669	658	878	-31.2134	3700	-56	2.34971300988773	6.64504060802139e-53	-0.569972301360228	0.000135406864844991
2358000	2360000	AT1G07650	NA	Chr1	2359548	2366561	0.832569	0.944617	2350000	2352000	AT1G07630	NA	Chr1	2349096	2351692	0.762154	0.815743	5700	interaction12177	1-2358000	+	1536	1-2350000	+	2627	8108	57	0.069862	-178.394348	0	17	0.069862	1700	-34.584517	889	1381	-31.2132	4000	-66	1.45981156525944	8.55221078151769e-14	-0.557545339723054	0.0012946798802239
11716000	11718000	AT4G22120	yes	Chr4	11715775	11719828	0.655736	0.738623	11702000	11704000	AT4G22080	yes	Chr4	11700554	11702666	3.44144	3.9429	3600	interaction432898	4-11716000	+	1660	4-11702000	+	3276	14313	36	0.069862	-97.053762	0	7	0.069862	700	-9.408944	1014	1720	-31.1966	2900	-36	-0.858086138075792	6.5065616779008e-10	-5.80722278362447	5.47366843625422e-28
18182000	18184000	AT2G43900	NA	Chr2	18178587	18183871	0.62043	0.628552	18174000	18176000	AT2G43880	yes	Chr2	18173033	18174482	3.70867	3.55801	5900	interaction244638	2-18182000	+	1982	2-18174000	+	2357	7756	59	0.069862	-186.35989	0	18	0.069862	1800	-37.464064	1120	1227	-31.1778	4100	-68	1.48229314567773	6.830868552743e-11	-5.59007058060857	3.69557497817412e-38
4906000	4908000	AT5G15130	yes	Chr5	4904346	4907094	3.74454	3.66277	4900000	4902000	AT5G15120	yes	Chr5	4898736	4900581	1.34004	1.09619	4400	interaction493967	5-4906000	+	2336	5-4900000	+	718	5631	44	0.069862	-127.580537	0	11	0.069862	1100	-18.590648	956	264	-31.1369	3300	-46	-5.20235252473875	5.82664219121898e-41	-2.81949474523868	0.000134817712277815
19254000	19256000	AT1G51850	yes	Chr1	19252846	19256783	1.8269	2.22887	19250000	19252000	AT1G51840	yes	Chr1	19249448	19250709	2.94154	2.86121	5100	interaction95150	1-19254000	+	1860	1-19250000	+	1231	4170	51	0.069862	-154.400142	0	14	0.069862	1400	-26.231036	1109	728	-31.113	3700	-56	-2.49074814184352	7.10242737769867e-09	-4.47906482357445	4.10692876154488e-81
13948000	13950000	AT2G32880	yes	Chr2	13948749	13950556	2.72046	3.67839	13940000	13942000	AT2G32860	yes	Chr2	13940186	13943804	3.12515	3.34328	8800	interaction221945	2-13948000	+	2067	2-13940000	+	2340	8481	88	0.069862	-311.989691	0	35	0.069862	3500	-93.604119	1144	1145	-31.0985	5300	-116	7.77776382637193	1.69896776699175e-110	5.43132588266453	3.50204992116579e-69
8110000	8112000	AT4G14070	NA	Chr4	8111961	8118160	0.833044	0.719897	8106000	8108000	AT4G14060	yes	Chr4	8107336	8108307	3.54836	3.83831	6400	interaction414214	4-8110000	+	1376	4-8106000	+	1554	4138	64	0.069862	-207.595438	0	21	0.069862	2100	-46.604056	712	734	-31.096	4300	-76	2.81232225054045	6.1785923227803e-151	-5.83608956607533	1.76520047603056e-65
16096000	16098000	AT4G33450	yes	Chr4	16095391	16096610	3.38073	5.0066	16092000	16094000	AT4G33440	yes	Chr4	16091939	16094958	0.950263	0.929713	12400	interaction456152	4-16096000	+	1692	4-16092000	+	1715	3386	124	0.069862	-482.585145	0	59	0.069862	5900	-187.564406	828	870	-31.0628	6500	-180	-5.78802471902014	1.94312282119402e-21	-0.794435508009044	3.87389413452023e-05
1072000	1074000	AT3G04090	yes	Chr3	1072091	1074160	0.799361	0.819275	1070000	1072000	AT3G04080	NA	Chr3	1067789	1071295	0.816141	0.835909	9700	interaction257504	3-1072000	+	2071	3-1070000	+	1763	1536	97	0.069862	-353.580174	0	41	0.069862	4100	-115.928616	1079	864	-31.0589	5600	-132	-0.412878682845321	0.0235058271299099	-0.840832465525948	1.40902396632268e-12
19100000	19102000	AT1G51500	yes	Chr1	19097796	19101080	1.22652	1.30997	19092000	19094000	AT1G51480	yes	Chr1	19090846	19094306	2.76558	3.75955	4900	interaction94447	1-19100000	+	1476	1-19092000	+	1693	7553	49	0.069862	-146.318964	0	13	0.069862	1300	-23.565244	770	982	-31.0567	3600	-54	4.14053065196747	6.59632626835703e-180	-6.29453304570281	3.19735494522318e-11
18528000	18530000	AT3G49970	yes	Chr3	18527215	18529066	0.920529	1.09209	18524000	18526000	AT3G49960	yes	Chr3	18524083	18525687	2.02909	3.01804	11600	interaction348622	3-18528000	+	2640	3-18524000	+	1186	3934	116	0.069862	-445.423696	0	54	0.069862	5400	-167.441385	1602	663	-31.0559	6200	-166	7.56745816026061	4.13483000194839e-12	-5.19483106478151	1.1215712210177e-20
11084000	11086000	AT1G31070	yes	Chr1	11084858	11088563	1.02995	0.955763	11078000	11080000	AT1G31050	yes	Chr1	11075626	11079240	3.68366	3.5748	3800	interaction58277	1-11084000	+	1088	1-11078000	+	1615	5596	38	0.069862	-104.562346	0	8	0.069862	800	-11.533208	479	785	-31.0443	3000	-38	-1.03906164390304	4.82905232107101e-11	-5.28585076621644	1.38732111211055e-128
5586000	5588000	AT3G16440	yes	Chr3	5585943	5587750	3.57843	4.23229	5572000	5574000	AT3G16410	yes	Chr3	5571991	5574541	2.33482	2.54081	2100	interaction281221	3-5586000	+	802	3-5572000	+	2876	14793	21	0.069862	-46.573431	0	2	0.069862	200	-1.330895	244	1196	-31.0248	1900	-16	-5.8500611369739	5.9747820537492e-31	-4.06210710584225	3.8050475675441e-40
27556000	27558000	AT1G73290	yes	Chr1	27556396	27558773	0.875459	1.15282	27550000	27552000	AT1G73270	yes	Chr1	27549020	27552517	2.16856	2.13777	6400	interaction137432	1-27556000	+	2152	1-27550000	+	1698	5818	64	0.069862	-207.318233	0	21	0.069862	2100	-46.589531	1038	752	-31.0243	4300	-76	-4.65390214702381	1.37362526192506e-22	-5.2828571048194	1.93571770584222e-73
7750000	7752000	AT4G13310	yes	Chr4	7750304	7753133	2.30196	2.10437	7740000	7742000	AT4G13290	yes	Chr4	7740282	7742857	2.04377	2.58768	5500	interaction412272	4-7750000	+	2086	4-7740000	+	2010	9924	55	0.069862	-170.028375	0	16	0.069862	1600	-31.720125	976	1084	-31.0092	3900	-62	-5.8436265144244	7.15377954823527e-18	-4.09782704328653	6.65823995266971e-16
750000	752000	AT2G02690	yes	Chr2	749918	751900	1.48984	2.08314	744000	746000	AT2G02680	yes	Chr2	745774	748573	2.3174	2.24656	3300	interaction154717	2-750000	+	1224	2-744000	+	854	5456	33	0.069862	-86.61396	0	6	0.069862	600	-7.458097	622	349	-31.0022	2700	-32	-6.81747299013182	3.18635053208157e-16	-3.72501386535379	2.22768505493994e-25
25542000	25544000	AT1G68150	yes	Chr1	25543968	25545717	1.7861	2.20805	25540000	25542000	AT1G68140	yes	Chr1	25538944	25541741	0.842735	0.833185	7100	interaction127479	1-25542000	+	1608	1-25540000	+	1711	1993	71	0.069862	-237.212988	0	25	0.069862	2500	-59.310388	808	917	-30.9914	4600	-88	-4.72759535291747	4.3447560570698e-78	-0.537258057143777	5.25844434081317e-06
19618000	19620000	AT5G48400	yes	Chr5	19616243	19619246	0.663021	0.857123	19610000	19612000	AT5G48385	NA	Chr5	19608559	19612007	0.771104	0.832614	5687.332407	interaction568053	5-19618000	+	2686	5-19610000	+	2151	7707	59	0.072475	-186.293035	0	17	0.069862	1700	-34.546909	1263	1225	-30.9682	3987.33	-68	-3.12326416858058	7.02204163782907e-07	-0.251559412612663	0.00839182807578047
16444000	16446000	AT2G39370	yes	Chr2	16444129	16445266	0.936379	0.819235	16436000	16438000	AT2G39360	yes	Chr2	16437471	16440154	0.857059	0.832025	3800	interaction235468	2-16444000	+	1185	2-16436000	+	2430	7485	38	0.069862	-104.511011	0	8	0.069862	800	-11.528107	540	1438	-30.9407	3000	-38	-4.20192427990101	2.68217797379681e-32	-0.510543212321194	0.0319809316497379
12308000	12310000	AT4G23590	yes	Chr4	12307125	12309647	3.53208	4.32828	12302000	12304000	AT4G23570	yes	Chr4	12299822	12302719	1.06567	1.93044	12235.821923	interaction436076	4-12308000	+	2336	4-12302000	+	2572	5929	132	0.075368	-520.60007	0	58	0.069862	5800	-182.57951	1420	1696	-30.93	6435.82	-194	-5.61502085331614	8.34142040979557e-22	1.5799243791896	5.78119441800616e-11
10128000	10130000	AT1G29030	NA	Chr1	10129034	10133961	0.750799	0.654361	10126000	10128000	AT1G29025	NA	Chr1	10124347	10127068	0.705936	0.938335	19700	interaction52985	1-10128000	+	2000	1-10126000	+	2119	2124	197	0.069862	-858.234904	0	112	0.069862	11200	-426.439848	1110	1250	-30.9046	8500	-320	-0.579993916320732	1.61037475024367e-05	-5.44123955854727	2.33655676946666e-51
23270000	23272000	AT3G62970	yes	Chr3	23270632	23272923	0.834043	0.791036	23266000	23268000	AT3G62950	yes	Chr3	23266248	23266934	3.79934	4.93594	15600	interaction373079	3-23270000	+	1571	3-23266000	+	2884	3701	156	0.069862	-644.08018	0	82	0.069862	8200	-286.917652	966	1581	-30.8803	7400	-240	0.537695242704191	0.000152408631914435	5.08974182795734	8.0750988064486e-41
3352000	3354000	AT1G10220	yes	Chr1	3352158	3354856	1.5138	2.02982	3350000	3352000	AT1G10210	NA	Chr1	3349218	3351180	0.715464	0.620551	10700	interaction17526	1-3352000	+	1248	1-3350000	+	1498	1805	107	0.069862	-401.834082	0	48	0.069862	4800	-143.454863	617	706	-30.8664	5900	-150	-2.19547242518238	0.000620809126684898	-0.863939950015108	0.00148875068073331
8928000	8930000	AT4G15670	yes	Chr4	8929178	8929765	3.32231	4.89968	8924000	8926000	AT4G15660	yes	Chr4	8925805	8926310	3.27089	3.95354	15100	interaction418837	4-8928000	+	1956	4-8924000	+	2831	3589	151	0.069862	-616.898695	0	78	0.069862	7800	-268.528372	1144	1688	-30.8652	7300	-230	7.10002191323116	2.4551968990766e-29	6.15564621235756	4.58938872696435e-30
8656000	8658000	AT1G24420	NA	Chr1	8656686	8657997	0.528578	0.745912	8652000	8654000	AT1G24400	yes	Chr1	8651406	8653828	1.51927	2.47478	9700	interaction45454	1-8656000	+	1931	1-8652000	+	2815	3933	97	0.069862	-353.346774	0	41	0.069862	4100	-115.76658	1046	1559	-30.8563	5600	-132	-4.73167837846778	9.47253668422067e-13	5.83632747981616	1.09483000486597e-61
9224000	9226000	AT1G26690	yes	Chr1	9224144	9225775	0.77191	0.951875	9220000	9222000	AT1G26680	NA	Chr1	9219462	9223649	0.597074	0.647508	14800	interaction48234	1-9224000	+	1797	1-9220000	+	2716	3827	148	0.069862	-602.143437	0	76	0.069862	7600	-259.964637	1033	1839	-30.8431	7200	-224	-0.753996300723479	0.00315471521643277	-3.41419214164038	2.44391020800553e-26
17602000	17604000	AT3G47740	yes	Chr3	17600650	17604965	1.50279	2.07066	17598000	17600000	AT3G47730	NA	Chr3	17594059	17598896	0.751919	0.70101	7100	interaction343548	3-17602000	+	1596	3-17598000	+	1636	3632	71	0.069862	-237.224635	0	25	0.069862	2500	-59.255714	1059	958	-30.7784	4600	-88	-5.63629128482847	6.10719748128447e-13	-1.83988250741046	9.76945567880061e-12
4356000	4358000	AT5G13550	NA	Chr5	4355275	4359552	0.744883	0.714172	4350000	4352000	AT5G13530	NA	Chr5	4345525	4354551	0.738737	0.697709	3300	interaction491130	5-4356000	+	1541	5-4350000	+	881	5941	33	0.069862	-86.595657	0	6	0.069862	600	-7.451325	791	451	-30.7732	2700	-32	-0.661147109376624	0.00150515018701489	-0.300733185627147	0.00363645703745587
7382000	7384000	AT3G21070	NA	Chr3	7380190	7383980	0.760477	0.762302	7378000	7380000	AT3G21060	NA	Chr3	7377433	7380213	0.732128	0.782529	8500	interaction291269	3-7382000	+	1059	3-7378000	+	1557	3740	85	0.069862	-300.140536	0	34	0.069862	3400	-90.444434	604	908	-30.7421	5100	-112	-0.803046695338385	0.00162202691183626	1.0290943381014	4.15187493186252e-07
6508000	6510000	AT1G18860	yes	Chr1	6509491	6511227	3.79302	3.85976	6506000	6508000	AT1G18850	yes	Chr1	6504805	6506424	0.767992	0.738989	6800	interaction34109	1-6508000	+	1331	1-6506000	+	727	1412	68	0.069862	-226.085462	0	24	0.069862	2400	-56.477713	576	354	-30.7288	4400	-84	-4.4150619480092	9.76410627478957e-47	-0.665101801910654	1.57287371784964e-06
5518000	5520000	AT5G16780	NA	Chr5	5517489	5522258	0.817805	0.802252	5514000	5516000	AT5G16770	yes	Chr5	5514883	5516936	2.89805	3.78704	12500	interaction497151	5-5518000	+	2741	5-5514000	+	1685	4058	125	0.069862	-487.508757	0	60	0.069862	6000	-191.810767	1610	799	-30.7126	6500	-182	0.302178380039103	0.00663241994394227	-4.74553357568712	4.24712057086043e-11
19106000	19108000	AT5G47050	NA	Chr5	19106339	19108348	0.729637	0.869215	19088000	19090000	AT5G47020	NA	Chr5	19081457	19090023	0.778043	0.692769	2100	interaction565280	5-19106000	+	1026	5-19088000	+	2500	18400	21	0.069862	-46.520709	0	2	0.069862	200	-1.330894	468	1414	-30.7075	1900	-16	-2.3600384280416	4.37752743500116e-11	0.16842071365066	0.0270197323555326
10962000	10964000	AT4G20310	yes	Chr4	10961611	10964056	0.756872	0.698622	10958000	10960000	AT4G20300	NA	Chr4	10955437	10959213	0.663478	0.806576	3000	interaction429339	4-10962000	+	1239	4-10958000	+	525	4372	30	0.069862	-76.41562	0	5	0.069862	500	-5.63827	672	227	-30.702	2500	-28	1.00701988051204	4.83074962321506e-11	-0.558240619554079	8.70632625448115e-11
10130000	10132000	AT1G29030	NA	Chr1	10129034	10133961	0.750799	0.654361	10124000	10126000	AT1G29025	NA	Chr1	10124347	10127068	0.705936	0.938335	6700	interaction52994	1-10130000	+	1188	1-10124000	+	2185	6040	67	0.069862	-220.563795	0	23	0.069862	2300	-52.932277	637	1198	-30.696	4400	-82	-0.579993916320732	1.61037475024367e-05	-5.44123955854727	2.33655676946666e-51
12530000	12532000	AT2G29140	NA	Chr2	12530837	12535399	0.615764	0.643307	12526000	12528000	AT2G29130	yes	Chr2	12524888	12527747	2.15986	1.68836	2100	interaction214492	2-12530000	+	942	2-12526000	+	956	4461	21	0.069862	-46.537517	0	2	0.069862	200	-1.330894	557	527	-30.6695	1900	-16	-0.361617359251757	0.0210431595068252	-3.53501901557921	1.71514593703684e-11
7106000	7108000	AT3G20370	NA	Chr3	7105370	7107225	0.75648	0.786275	7096000	7098000	AT3G20350	NA	Chr3	7096347	7099767	0.778559	0.736787	3300	interaction289666	3-7106000	+	1227	3-7096000	+	2045	9579	33	0.069862	-86.4331	0	6	0.069862	600	-7.447955	528	1081	-30.6606	2700	-32	-2.23683775937305	4.73183893963027e-06	1.29316115498345	1.18405457049026e-07
2736000	2738000	AT1G08620	NA	Chr1	2736773	2743758	0.753432	0.731584	2726000	2728000	AT1G08600	NA	Chr1	2723823	2733613	0.734074	0.659039	2100	interaction14296	1-2736000	+	1098	1-2726000	+	1684	10093	21	0.069862	-46.508362	0	2	0.069862	200	-1.330894	591	886	-30.637	1900	-16	-0.432060928563455	0.00314226885927715	-0.454218527581567	0.000952060434244578
22124000	22126000	AT3G59890	NA	Chr3	22124197	22126630	0.702286	0.654124	22110000	22112000	AT3G59850	yes	Chr3	22109163	22111609	2.89536	2.41055	2100	interaction367712	3-22124000	+	2421	3-22110000	+	1234	13987	21	0.069862	-46.488996	0	2	0.069862	200	-1.330894	1663	593	-30.6361	1900	-16	-0.438099231202719	0.0441826474279193	-5.53418918383565	8.8460413335565e-47
14770000	14772000	AT4G30190	yes	Chr4	14770498	14776058	0.735256	0.712577	14762000	14764000	AT4G30170	yes	Chr4	14762840	14764627	3.7265	3.25773	4000	interaction449363	4-14770000	+	2016	4-14762000	+	1440	8185	40	0.069862	-111.815887	0	9	0.069862	900	-13.755523	996	493	-30.6132	3100	-40	-2.95337920966179	2.66475105904154e-24	-5.06996518156847	1.12933663722793e-88
24796000	24798000	AT1G66470	yes	Chr1	24795213	24796988	3.75494	4.93338	24780000	24782000	AT1G66430	yes	Chr1	24778270	24780629	0.80816	0.792057	2100	interaction123389	1-24796000	+	1460	1-24780000	+	1868	15763	21	0.069862	-46.464836	0	2	0.069862	200	-1.330894	652	964	-30.612	1900	-16	-5.16915935265148	2.7426719597456e-22	2.63307126249562	3.57641531019027e-152
2292000	2294000	AT5G07290	NA	Chr5	2293352	2298976	0.814247	0.720625	2286000	2288000	AT5G07280	NA	Chr5	2285039	2288686	0.502086	0.562606	4600	interaction480164	5-2292000	+	797	5-2286000	+	2694	5560	46	0.069862	-135.199244	0	12	0.069862	1200	-21.065295	356	1613	-30.6049	3400	-50	0.294742467049888	0.0300761794139888	3.03422034135637	1.31769656929062e-18
11938000	11940000	AT4G22720	NA	Chr4	11936941	11938966	0.822685	0.710095	11924000	11926000	AT4G22680	yes	Chr4	11922339	11924216	4.04365	4.18821	2100	interaction433905	4-11938000	+	1714	4-11924000	+	1369	13552	21	0.069862	-46.473599	0	2	0.069862	200	-1.330894	891	692	-30.598	1900	-16	-0.39646866483614	0.0333648616029749	-1.79819115154147	0.000999820678508219
12940000	12942000	AT2G30370	yes	Chr2	12940454	12942409	2.85877	4.10302	12930000	12932000	AT2G30340	yes	Chr2	12931218	12932582	2.67545	3.27105	2100	interaction216735	2-12940000	+	1492	2-12930000	+	1482	9540	21	0.069862	-46.462879	0	2	0.069862	200	-1.330893	876	752	-30.5799	1900	-16	1.42730532145208	3.7555948986372e-06	-5.10923866470595	8.50865581261768e-23
17092000	17094000	AT3G46450	NA	Chr3	17092937	17095639	0.77924	0.695291	17090000	17092000	AT3G46440	NA	Chr3	17089044	17091875	0.735925	0.750814	9200	interaction340959	3-17092000	+	1653	3-17090000	+	1810	2300	92	0.069862	-330.700135	0	38	0.069862	3800	-104.610875	1010	1152	-30.5774	5400	-124	0.294795167650102	0.0171865218455051	-1.9968034428362	1.55499829739632e-158
10120000	10122000	AT2G23770	NA	Chr2	10120241	10122080	0.661854	0.769675	10098000	10100000	AT2G23740	NA	Chr2	10097558	10103398	0.681558	0.659443	3800	interaction201941	2-10120000	+	2181	2-10098000	+	1650	21974	38	0.069862	-104.349422	0	8	0.069862	800	-11.509117	1233	1030	-30.5612	3000	-38	-0.851094823585772	0.0399918810965268	0.541463445352884	0.00752332775714785
27774000	27776000	AT1G73860	yes	Chr1	27770985	27776857	0.722518	0.814391	27768000	27770000	AT1G73850	yes	Chr1	27767262	27770457	2.61391	1.9599	11900	interaction138436	1-27774000	+	3026	1-27768000	+	1705	5973	119	0.069862	-458.164337	0	56	0.069862	5600	-175.233176	2063	802	-30.5574	6300	-170	-3.8120104673968	1.94631516690857e-28	-1.07258762185463	3.03703968290071e-17
27822000	27824000	AT1G73980	NA	Chr1	27820148	27824036	0.77062	0.678523	27808000	27810000	AT1G73960	NA	Chr1	27805044	27814446	0.78767	0.642078	2100	interaction138707	1-27822000	+	2625	1-27808000	+	1600	13322	21	0.069862	-46.453309	0	2	0.069862	200	-1.330893	1668	959	-30.5349	1900	-16	0.249537628675638	0.0276910164499342	0.474460260340472	0.00967164577700594
18198000	18200000	AT2G43945	NA	Chr2	18197843	18200194	0.756708	0.699539	18182000	18184000	AT2G43900	NA	Chr2	18178587	18183871	0.62043	0.628552	2100	interaction244710	2-18198000	+	1916	2-18182000	+	1982	16141	21	0.069862	-46.433507	0	2	0.069862	200	-1.330893	1101	1120	-30.5139	1900	-16	2.72902552513043	2.41485540552792e-53	1.48229314567773	6.830868552743e-11
21022000	21024000	AT3G56760	NA	Chr3	21020557	21023756	0.75941	0.704112	21016000	21018000	AT3G56740	NA	Chr3	21015370	21018157	0.779202	0.759572	9500	interaction361551	3-21022000	+	2647	3-21016000	+	1647	5795	95	0.069862	-344.512175	0	40	0.069862	4000	-112.036627	1274	1015	-30.4795	5500	-128	-0.226904423215973	0.0209381379646679	-0.692981047784499	1.52347546816543e-08
25766000	25768000	AT1G68620	yes	Chr1	25765946	25767240	1.80942	2.21231	25760000	25762000	AT1G68600	yes	Chr1	25759841	25762934	1.15969	1.74583	9800	interaction128523	1-25766000	+	2248	1-25760000	+	1674	6093	98	0.069862	-358.367359	0	42	0.069862	4200	-119.58523	1301	995	-30.4551	5600	-134	-2.88675602022035	4.25410397379565e-07	5.59839961134584	9.72967449435932e-51
20228000	20230000	AT5G49780	yes	Chr5	20229255	20233095	1.73014	2.20718	20226000	20228000	AT5G49770	yes	Chr5	20222668	20227267	2.25492	3.04487	16310.946917	interaction571337	5-20228000	+	2463	5-20226000	+	3341	2073	241	0.103224	-1097.540125	0	88	0.069862	8800	-312.983383	1352	1681	-30.4521	7510.95	-410	-3.87017635664351	1.65165135046626e-31	-5.34104187031063	1.2767702966006e-56
17826000	17828000	AT4G37910	NA	Chr4	17825079	17828180	0.706873	0.676544	17822000	17824000	AT4G37900	NA	Chr4	17821736	17824627	0.517528	0.566668	14204.143066	interaction464474	4-17826000	+	2573	4-17822000	+	2362	3995	155	0.076236	-636.267491	0	72	0.069862	7200	-241.930522	1341	1289	-30.451	7004.14	-238	-0.552541011070767	0.0112901304325503	-2.25255458555461	2.30324435167901e-10
10730000	10732000	AT4G19720	yes	Chr4	10730362	10731750	3.42336	2.50374	10708000	10710000	AT4G19690	yes	Chr4	10707425	10709015	2.78722	3.15353	3300	interaction427892	4-10730000	+	1855	4-10708000	+	1897	21847	33	0.069862	-86.293951	0	6	0.069862	600	-7.441067	812	920	-30.4333	2700	-32	-5.7627611558776	8.5463899699399e-27	-5.65375943025588	5.04539491373056e-09
18186000	18188000	AT1G49180	yes	Chr1	18184653	18187529	1.10633	1.05678	18180000	18182000	AT1G49160	NA	Chr1	18179303	18182391	0.735834	0.776339	3300	interaction89516	1-18186000	+	1551	1-18180000	+	1902	6150	33	0.069862	-86.347133	0	6	0.069862	600	-7.440973	818	1016	-30.4303	2700	-32	0.763390431287931	1.70006437768051e-05	-1.45131420469603	1.60099961392396e-15
27142000	27144000	AT1G72140	yes	Chr1	27141813	27144490	3.54797	3.82004	27134000	27136000	AT1G72125	yes	Chr1	27134167	27136389	2.1212	2.2068	8128.595133	interaction135232	1-27142000	+	1850	1-27134000	+	3148	7886	85	0.073054	-298.669553	0	32	0.069862	3200	-83.112874	806	1490	-30.4242	4928.6	-112	-1.85369581594838	0.000342047677264722	-5.48725665324794	1.0489290888206e-37
3214000	3216000	AT1G09890	yes	Chr1	3214236	3217538	1.31196	1.1841	3210000	3212000	AT1G09880	yes	Chr1	3208827	3211653	0.648254	0.618039	14300	interaction16824	1-3214000	+	1642	1-3210000	+	2928	3538	143	0.069862	-577.364927	0	73	0.069862	7300	-247.492094	815	1718	-30.4011	7000	-216	-0.406699319986567	0.0278083319765644	-1.21452909728171	0.00565386755568405
6912000	6914000	AT1G19910	yes	Chr1	6913228	6914594	0.818421	0.824789	6908000	6910000	AT1G19900	yes	Chr1	6906898	6908741	4.47111	5.31728	5800	interaction36124	1-6912000	+	1519	1-6908000	+	1891	4632	58	0.069862	-182.504196	0	18	0.069862	1800	-37.535755	709	880	-30.3812	4000	-68	-0.861086921617497	4.48116580878073e-06	-6.09442184617484	1.70895692528159e-49
2832000	2834000	AT3G09230	yes	Chr3	2833397	2835338	0.692479	0.630742	2828000	2830000	AT3G09220	yes	Chr3	2827238	2830542	3.78848	4.18537	11040.138967	interaction266480	3-2832000	+	2375	3-2828000	+	3356	4094	158	0.099983	-651.610302	0	51	0.069862	5100	-154.814584	878	1375	-30.3607	5940.14	-244	-0.569972301360228	0.000135406864844991	-5.9971812975417	8.21898788694029e-23
23300000	23302000	AT5G57530	yes	Chr5	23300320	23301605	0.782821	0.731153	23286000	23288000	AT5G57500	yes	Chr5	23286236	23287571	1.23225	1.50785	4000	interaction586685	5-23300000	+	2361	5-23286000	+	1252	13796	40	0.069862	-111.894839	0	9	0.069862	900	-13.739936	1523	673	-30.3583	3100	-40	-6.10467094317868	3.55155422881274e-22	-1.76040290202731	1.34630880618025e-06
20240000	20242000	AT5G49810	yes	Chr5	20239342	20246380	0.876764	0.724143	20232000	20234000	AT5G49780	yes	Chr5	20229255	20233095	1.73014	2.20718	6000	interaction571413	5-20240000	+	1483	5-20232000	+	2691	8127	60	0.069862	-190.781994	0	19	0.069862	1900	-40.460329	901	1371	-30.3423	4100	-70	-0.875383077167553	1.46524939215444e-26	-3.87017635664351	1.65165135046626e-31
25406000	25408000	AT1G67760	yes	Chr1	25405579	25406372	4.15595	4.49263	25392000	25394000	AT1G67730	NA	Chr1	25391459	25393610	0.850105	0.880148	4000	interaction126733	1-25406000	+	1641	1-25392000	+	2140	13467	40	0.069862	-111.751658	0	9	0.069862	900	-13.737211	719	1437	-30.3142	3100	-40	-3.30063991148916	2.84093370900699e-10	-0.52939951563249	0.000236508699364736
10098000	10100000	AT4G18270	yes	Chr4	10099207	10101897	0.777956	0.679971	10096000	10098000	AT4G18260	yes	Chr4	10093523	10097503	1.03106	1.07576	10600	interaction424893	4-10098000	+	1060	4-10096000	+	1480	1883	106	0.069862	-397.901355	0	48	0.069862	4800	-143.391153	639	836	-30.2774	5800	-148	0.901329865327292	0.000386233843784316	-2.48828052649789	5.07700396939821e-08
86000	88000	AT1G01200	yes	Chr1	86514	88213	1.48396	0.883998	84000	86000	AT1G01190	yes	Chr1	83044	84864	2.41841	2.90624	7000	interaction314	1-86000	+	1391	1-84000	+	1144	2238	70	0.069862	-233.520056	0	25	0.069862	2500	-59.407393	695	633	-30.2637	4500	-86	-2.38709367702812	3.60882931393356e-19	-3.96760620457728	5.26060485421114e-30
8860000	8862000	AT4G15510	NA	Chr4	8860615	8862665	0.817859	0.664918	8856000	8858000	AT4G15500	yes	Chr4	8856987	8858572	1.25271	1.39548	10100	interaction418434	4-8860000	+	1603	4-8856000	+	2136	3846	101	0.069862	-372.500873	0	44	0.069862	4400	-127.130011	1097	1318	-30.2621	5700	-138	3.31836606780169	2.84735934291514e-73	-1.96171852256515	5.00222497010575e-24
14758000	14760000	AT2G35020	NA	Chr2	14756710	14760706	0.648935	0.670535	14754000	14756000	AT2G35010	NA	Chr2	14754270	14756323	0.80782	0.721523	7000	interaction226600	2-14758000	+	2205	2-14754000	+	1358	3867	70	0.069862	-233.18388	0	25	0.069862	2500	-59.398355	1379	646	-30.2291	4500	-86	0.503510358601052	0.000680034570699849	-0.29815033357379	0.0259714642513146
22308000	22310000	AT3G60350	NA	Chr3	22306487	22311186	0.742066	0.627159	22304000	22306000	AT3G60340	NA	Chr3	22304151	22306512	0.785442	0.706416	7000	interaction368572	3-22308000	+	1555	3-22304000	+	1151	4023	70	0.069862	-233.507039	0	25	0.069862	2500	-59.394306	1009	652	-30.2137	4500	-86	0.482799778008006	4.73010958812252e-05	0.536839745255738	0.016180902009698
802000	804000	AT4G01860	NA	Chr4	801031	808060	0.696433	0.615598	796000	798000	AT4G01850	NA	Chr4	796096	798286	0.635836	0.669275	10391.477902	interaction378091	4-802000	+	2681	4-796000	+	2159	6135	108	0.072609	-404.594185	0	46	0.069862	4600	-134.823341	1561	1126	-30.2098	5791.48	-150	-0.665380442086002	3.27117546463144e-05	-0.778153860840848	4.05922811301713e-12
3736000	3738000	AT5G11610	yes	Chr5	3735349	3738217	1.49946	1.71897	3716000	3718000	AT5G11570	yes	Chr5	3715942	3718276	3.17825	2.67313	4000	interaction487853	5-3736000	+	1592	5-3716000	+	3113	20055	40	0.069862	-111.765808	0	9	0.069862	900	-13.728311	926	1376	-30.1711	3100	-40	1.06803621018605	1.36720835984813e-05	-3.97153394043936	2.39788193043395e-26
4518000	4520000	AT5G14000	NA	Chr5	4518007	4519300	0.690938	0.678156	4510000	4512000	AT5G13980	NA	Chr5	4508495	4514666	0.824286	0.700633	4200	interaction492025	5-4518000	+	1145	5-4510000	+	3009	7240	42	0.069862	-119.474174	0	10	0.069862	1000	-16.071055	599	1901	-30.1697	3200	-44	-3.01672406478309	9.63425820124693e-28	0.505658671232582	0.0024413170193819
22224000	22226000	AT3G60160	yes	Chr3	22223802	22229204	0.471749	0.459362	22218000	22220000	AT3G60140	yes	Chr3	22216671	22220824	3.42366	1.93579	4400	interaction368171	3-22224000	+	2216	3-22218000	+	1092	5899	44	0.069862	-127.133889	0	11	0.069862	1100	-18.505142	1220	513	-30.1577	3300	-46	2.29476544258446	7.38614888568145e-06	-2.57645471903477	0.00222271293859968
14296000	14298000	AT2G33793	yes	Chr2	14296993	14300506	0.765904	0.652532	14294000	14296000	AT2G33790	yes	Chr2	14293560	14295271	3.93656	4.37501	14000	interaction223991	2-14296000	+	2511	2-14294000	+	1750	1582	140	0.069862	-561.84793	0	71	0.069862	7100	-239.082871	1367	736	-30.1527	6900	-210	1.18498418834214	0.00387555538295563	-6.01611674207717	2.00087111638882e-31
4332000	4334000	AT3G13340	NA	Chr3	4331530	4335073	0.833964	0.805271	4328000	4330000	AT3G13330	NA	Chr3	4319646	4330061	0.688392	0.637371	4000	interaction274871	3-4332000	+	1876	3-4328000	+	1853	3977	40	0.069862	-111.699128	0	9	0.069862	900	-13.726972	1041	968	-30.1497	3100	-40	-0.348746991483651	0.00796693192247327	-0.744412933376412	0.00031067594965476
7874000	7876000	AT3G22270	NA	Chr3	7874144	7878468	0.845465	0.787592	7872000	7874000	AT3G22260	yes	Chr3	7870891	7873548	0.832498	0.763141	6600	interaction294032	3-7874000	+	1646	3-7872000	+	943	1861	66	0.069862	-216.777985	0	23	0.069862	2300	-53.097757	887	442	-30.0935	4300	-80	0.279007789574883	0.0458906494625431	-1.05793978215602	1.62021197801607e-11
7804000	7806000	AT5G23190	yes	Chr5	7803140	7805815	1.62055	1.28225	7798000	7800000	AT5G23170	yes	Chr5	7798196	7799448	3.37022	1.54587	10800	interaction509536	5-7804000	+	1625	5-7798000	+	2522	5574	108	0.069862	-405.492969	0	49	0.069862	4900	-147.034295	775	1026	-30.089	5900	-152	-5.24691656224615	1.76041850945074e-28	-1.16518596577042	1.69619418858663e-05
9452000	9454000	AT4G16790	NA	Chr4	9451584	9453254	0.777578	0.678103	9434000	9436000	AT4G16770	yes	Chr4	9434392	9437172	1.24236	0.922109	5200	interaction421723	4-9452000	+	1936	4-9434000	+	1072	17994	52	0.069862	-158.551885	0	15	0.069862	1500	-28.990086	1186	595	-30.0826	3700	-58	-0.694753656929633	4.53431528000314e-05	0.621351693852873	1.91305675397979e-05
5566000	5568000	AT3G16400	yes	Chr3	5566085	5568545	2.21919	1.09908	5564000	5566000	AT3G16390	yes	Chr3	5562570	5564571	3.09517	3.24975	5900	interaction281101	3-5566000	+	1099	3-5564000	+	1259	2194	59	0.069862	-187.04992	0	19	0.069862	1900	-40.667465	412	562	-30.0715	4000	-70	-1.46013210206601	0.00197838312226521	-3.57997220945164	2.43644009285561e-18
10126000	10128000	AT1G29025	NA	Chr1	10124347	10127068	0.705936	0.938335	10120000	10122000	AT1G29020	yes	Chr1	10120496	10122902	0.892388	1.232	10400	interaction52964	1-10126000	+	2119	1-10120000	+	2619	5608	104	0.069862	-385.770428	0	46	0.069862	4600	-134.73368	1250	1392	-30.0504	5800	-144	-5.44123955854727	2.33655676946666e-51	-4.000752555755	1.3063560194094e-40
21160000	21162000	AT3G57170	NA	Chr3	21159406	21163184	0.809232	0.77256	21154000	21156000	AT3G57150	NA	Chr3	21153972	21156009	0.695943	0.707019	5200	interaction362261	3-21160000	+	1768	3-21154000	+	1292	5470	52	0.069862	-158.342909	0	15	0.069862	1500	-28.985491	1107	613	-30.0482	3700	-58	0.408483022208735	7.96892932762202e-05	-0.826765679256276	0.0308868971850802
18844000	18846000	AT2G45750	yes	Chr2	18842538	18845467	1.7224	1.56312	18840000	18842000	AT2G45740	yes	Chr2	18839585	18841403	0.961506	1.67541	8200	interaction247878	2-18844000	+	2116	2-18840000	+	1844	3997	82	0.069862	-285.246611	0	32	0.069862	3200	-82.976599	1047	1057	-30.0451	5000	-106	-3.64481063727127	4.97806864290699e-88	3.26134077467816	9.41590643076536e-62
22874000	22876000	AT5G56500	yes	Chr5	22873790	22877402	0.750885	0.842924	22866000	22868000	AT5G56460	yes	Chr5	22865109	22867996	0.81705	0.878131	5400	interaction584691	5-22874000	+	2691	5-22866000	+	1451	8250	54	0.069862	-166.264128	0	16	0.069862	1600	-31.756642	1446	732	-29.9923	3800	-62	-1.46544211610361	2.00889513523702e-28	-1.28642758004281	8.58577233116352e-06
7568000	7570000	AT2G17430	NA	Chr2	7568017	7570840	0.604762	0.82044	7562000	7564000	AT2G17410	NA	Chr2	7558976	7563752	0.799434	0.715559	7700	interaction188858	2-7568000	+	2489	2-7562000	+	1730	5813	77	0.069862	-263.225204	0	29	0.069862	2900	-72.600206	1131	1014	-29.9673	4800	-98	-2.62463907096101	6.29440873892471e-39	0.385988331977214	0.009474798745725
5578000	5580000	AT3G16420	yes	Chr3	5579385	5580953	2.04457	1.96203	5570000	5572000	AT3G16410	yes	Chr3	5571991	5574541	2.33482	2.54081	3000	interaction281165	3-5578000	+	1691	3-5570000	+	1570	8474	30	0.069862	-75.886123	0	5	0.069862	500	-5.622465	533	520	-29.9509	2500	-28	-1.48347976613498	0.00673681941841922	-4.06210710584225	3.8050475675441e-40
14644000	14646000	AT4G29930	yes	Chr4	14644008	14647591	1.83883	1.12792	14634000	14636000	AT4G29920	yes	Chr4	14632652	14635885	0.657139	0.761217	2700	interaction448683	4-14644000	+	675	4-14634000	+	2892	9523	27	0.069862	-66.010297	0	4	0.069862	400	-3.975301	286	1648	-29.9059	2300	-24	-4.17207642797369	7.11764052411139e-28	-0.607528237540874	0.00400103782793584
7382000	7384000	AT2G16990	yes	Chr2	7383034	7387854	2.26747	1.19478	7378000	7380000	AT2G16980	yes	Chr2	7376348	7381103	2.6897	1.3135	12400	interaction187647	2-7382000	+	1741	2-7378000	+	2061	3450	124	0.069862	-482.453899	0	60	0.069862	6000	-191.626866	870	1140	-29.8894	6400	-180	-1.86229681285964	2.48068376605245e-12	-5.23475397992809	1.82168547859213e-40
8006000	8008000	AT3G22600	NA	Chr3	8006507	8007471	0.552587	0.619635	8004000	8006000	AT3G22590	NA	Chr3	8003933	8005579	0.835502	0.780651	26800	interaction294705	3-8006000	+	1724	3-8004000	+	2512	1790	268	0.069862	-1256.859084	0	170	0.069862	17000	-723.098347	973	1336	-29.8735	9800	-470	-4.58832165975421	6.11470070528786e-76	0.237958236505384	0.0121024254587497
13388000	13390000	AT2G31400	yes	Chr2	13387003	13390706	0.789897	0.755762	13384000	13386000	AT2G31390	NA	Chr2	13383422	13386209	0.718429	0.809963	11400	interaction218931	2-13388000	+	2194	2-13384000	+	2109	3823	114	0.069862	-433.262663	0	53	0.069862	5300	-162.644664	1325	1014	-29.8556	6100	-162	1.60582949753062	2.02774160447214e-72	-2.99078173439581	2.86754965066902e-110
19038000	19040000	AT5G46900	yes	Chr5	19039700	19040402	3.51254	4.15429	19036000	19038000	AT5G46890	yes	Chr5	19036295	19036916	3.49538	4.37508	8400	interaction564969	5-19038000	+	1116	5-19036000	+	998	1600	84	0.069862	-295.824093	0	34	0.069862	3400	-90.554531	553	539	-29.8491	5000	-110	-6.34056706174192	5.27347435043596e-34	-6.25102868090858	3.60126278216458e-26
12340000	12342000	AT2G28780	yes	Chr2	12340033	12343421	4.01266	3.56232	12334000	12336000	AT2G28755	yes	Chr2	12334171	12334459	1.39006	0.983504	7500	interaction213281	2-12340000	+	2500	2-12334000	+	1757	6066	75	0.069862	-254.437512	0	28	0.069862	2800	-69.280127	1147	836	-29.8486	4700	-94	-4.45253753835839	8.97821082218052e-20	-2.20857460113574	0.000627199474236965
6928000	6930000	AT5G20490	NA	Chr5	6926622	6937506	0.803013	0.758248	6924000	6926000	AT5G20480	NA	Chr5	6922479	6925887	0.649687	0.604862	10000	interaction504946	5-6928000	+	1401	5-6924000	+	1593	3710	100	0.069862	-368.279024	0	44	0.069862	4400	-127.379781	848	980	-29.8408	5600	-138	-0.38708320981384	2.81562496551873e-07	1.13341479550279	1.17723202708306e-10
4604000	4606000	AT1G13420	yes	Chr1	4604840	4606053	2.64875	3.078	4600000	4602000	AT1G13410	yes	Chr1	4601260	4603298	0.863311	0.895291	9500	interaction24079	1-4604000	+	2728	1-4600000	+	1089	3838	95	0.069862	-345.942801	0	41	0.069862	4100	-116.28396	1501	627	-29.8266	5400	-128	-5.3506563937017	6.75564361364473e-31	-0.6840389681481	0.00135152742569404
23214000	23216000	AT5G57320	NA	Chr5	23212689	23217549	0.584513	0.536868	23208000	23210000	AT5G57300	NA	Chr5	23208476	23211139	0.851554	0.74718	4800	interaction586247	5-23214000	+	2058	5-23208000	+	1148	5663	48	0.069862	-142.609189	0	13	0.069862	1300	-23.578443	1233	669	-29.8162	3500	-52	1.07989401316284	0.00194725195136608	-0.445677225562746	4.40897869836344e-05
6098000	6100000	AT3G17820	NA	Chr3	6097413	6099595	0.762205	0.765868	6094000	6096000	AT3G17810	NA	Chr3	6094097	6096566	0.792369	0.682102	19000	interaction284030	3-6098000	+	2635	3-6094000	+	2026	3543	190	0.069862	-820.531442	0	108	0.069862	10800	-407.21276	1580	1109	-29.8056	8200	-306	-0.911256327130217	2.81844143873978e-08	-1.51750590849365	5.08801440911128e-35
6244000	6246000	AT2G14620	yes	Chr2	6244780	6246233	1.73518	2.19636	6242000	6244000	AT2G14610	yes	Chr2	6241703	6242463	4.36242	4.65029	12000	interaction181792	2-6244000	+	2104	2-6242000	+	1077	2182	120	0.069862	-465.583307	0	58	0.069862	5800	-183.801187	1604	696	-29.7923	6200	-174	-0.859177774041125	0.00127405658508643	6.01671345543424	1.19819960226364e-05
838000	840000	AT4G01930	yes	Chr4	838801	840760	1.18708	1.04285	832000	834000	AT4G01925	yes	Chr4	833172	834340	1.30554	1.6712	10500	interaction378286	4-838000	+	2083	4-832000	+	2276	5951	105	0.069862	-390.519554	0	47	0.069862	4700	-138.718139	1139	1122	-29.7872	5800	-146	-3.06874693366252	7.60593157015342e-13	-5.48512005805484	9.7977823966127e-35
4514000	4516000	AT3G13750	NA	Chr3	4510964	4516298	0.804993	0.782637	4504000	4506000	AT3G13740	NA	Chr3	4504269	4506311	0.792913	0.774769	4600	interaction275812	3-4514000	+	1385	3-4504000	+	1280	9906	46	0.069862	-134.714631	0	12	0.069862	1200	-20.986308	806	709	-29.7809	3400	-50	2.18180677257674	2.07688513962312e-22	1.9485918057953	6.45428072272656e-63
10264000	10266000	AT4G18650	yes	Chr4	10263968	10265439	2.40948	1.69032	10260000	10262000	AT4G18640	yes	Chr4	10259677	10263764	0.94151	0.690587	9800	interaction425805	4-10264000	+	1107	4-10260000	+	2120	3522	98	0.069862	-359.867216	0	43	0.069862	4300	-124.282779	501	1104	-29.7633	5500	-134	4.11896143076872	3.47220631033688e-08	-1.70825819529982	3.67656409388195e-23
17314000	17316000	AT4G36740	yes	Chr4	17314558	17316374	3.58145	2.4553	17312000	17314000	AT4G36730	NA	Chr4	17309611	17312488	0.856439	0.782655	5500	interaction462442	4-17314000	+	876	4-17312000	+	688	1617	55	0.069862	-171.449382	0	17	0.069862	1700	-34.751604	427	403	-29.7628	3800	-64	-2.85114025885083	6.31885974058145e-15	0.792036927657075	1.52652266216205e-06
20282000	20284000	AT3G54790	NA	Chr3	20281534	20285126	0.704916	0.619508	20278000	20280000	AT3G54780	NA	Chr3	20278876	20281551	0.618863	0.542576	17200	interaction357663	3-20282000	+	2783	3-20278000	+	1634	3583	172	0.069862	-727.084557	0	95	0.069862	9500	-346.909911	1733	889	-29.7416	7700	-272	0.415809071137043	0.00388347860290056	-1.92538490287711	1.24412412887408e-20
8262000	8264000	AT2G19080	yes	Chr2	8262749	8264964	0.886668	0.814598	8258000	8260000	AT2G19060	yes	Chr2	8256999	8260545	3.73344	3.59642	4800	interaction192313	2-8262000	+	1381	2-8258000	+	1510	3676	48	0.069862	-142.445943	0	13	0.069862	1300	-23.569032	800	738	-29.7312	3500	-52	-0.23856157791748	0.00927640016418426	-6.20989958536687	7.35032820159004e-15
9186000	9188000	AT4G16230	yes	Chr4	9185297	9186779	2.70342	2.82858	9182000	9184000	AT4G16220	yes	Chr4	9182282	9183922	1.72525	1.66802	18800	interaction420327	4-9186000	+	1718	4-9182000	+	2044	3312	188	0.069862	-811.50043	0	107	0.069862	10700	-403.650541	905	1137	-29.7218	8100	-304	-4.16420202335036	1.80873840884222e-10	-3.78150987820437	9.18726283900942e-08
10250000	10252000	AT4G18610	yes	Chr4	10250697	10251542	5.13014	1.67922	10244000	10246000	AT4G18600	NA	Chr4	10239880	10247372	0.70369	0.631361	2700	interaction425742	4-10250000	+	1124	4-10244000	+	1637	5932	27	0.069862	-65.813248	0	4	0.069862	400	-3.972854	364	1146	-29.7186	2300	-24	-4.51954972710935	4.98604740545578e-29	0.335511617153772	0.00949269167446632
25646000	25648000	AT1G68400	yes	Chr1	25646038	25648946	0.895761	0.970177	25642000	25644000	AT1G68390	yes	Chr1	25642733	25645607	2.0976	1.59724	7600	interaction128040	1-25646000	+	1632	1-25642000	+	1196	3754	76	0.069862	-259.580469	0	29	0.069862	2900	-72.912838	904	559	-29.7164	4700	-96	1.75675145778025	1.5838426865419e-23	-1.92347595629611	3.66016764928941e-08
14896000	14898000	AT5G37510	NA	Chr5	14897409	14900657	0.799694	0.765165	14892000	14894000	AT5G37500	yes	Chr5	14889691	14895214	1.11493	1.00529	6800	interaction544279	5-14896000	+	1369	5-14892000	+	1900	3976	68	0.069862	-224.585273	0	24	0.069862	2400	-56.09872	723	1019	-29.7108	4400	-84	-0.684803066992742	6.67269760646103e-20	-1.13772243248078	7.92158161596435e-07
8402000	8404000	AT4G14650	yes	Chr4	8400573	8402911	0.669209	0.63931	8396000	8398000	AT4G14640	yes	Chr4	8397711	8400076	1.63119	1.5229	8300	interaction415787	4-8402000	+	1560	4-8396000	+	1669	5520	83	0.069862	-290.049806	0	33	0.069862	3300	-86.600961	888	873	-29.7046	5000	-108	-2.20846440983523	1.10042370890773e-18	-2.60169709214506	3.36420487304634e-12
642000	644000	AT4G01510	yes	Chr4	642732	644336	0.948953	0.858936	626000	628000	AT4G01480	yes	Chr4	626117	628055	0.772016	0.81601	3500	interaction377261	4-642000	+	2107	4-626000	+	1372	16046	35	0.069862	-93.520934	0	7	0.069862	700	-9.415046	1223	724	-29.6985	2800	-34	0.717056400187999	0.000308878998201304	-3.69910663265754	3.69337080842072e-47
12908000	12910000	AT4G25170	NA	Chr4	12909574	12911580	0.767124	0.785747	12906000	12908000	AT4G25160	NA	Chr4	12903190	12907338	0.734696	0.623995	6600	interaction439289	4-12908000	+	1078	4-12906000	+	2553	2099	66	0.069862	-216.488699	0	23	0.069862	2300	-52.963386	588	1385	-29.6924	4300	-80	0.769392457559939	2.09300903178462e-07	-2.41861211938915	8.41765285206189e-12
194000	196000	AT2G01440	NA	Chr2	193700	199248	0.779379	0.662946	190000	192000	AT2G01430	yes	Chr2	187797	190369	3.06119	2.30766	5100	interaction152230	2-194000	+	1737	2-190000	+	710	4843	51	0.069862	-155.160319	0	15	0.069862	1500	-29.112478	1029	335	-29.6814	3600	-58	0.769446534858115	8.63117336134541e-14	-3.56901572828836	3.44312930276838e-18
24986000	24988000	AT1G66960	yes	Chr1	24984940	24989797	2.11796	2.81176	24982000	24984000	AT1G66950	yes	Chr1	24978204	24984619	1.66084	2.15792	18217.037308	interaction124394	1-24986000	+	2535	1-24982000	+	2412	3538	200	0.0767	-872.632468	0	104	0.070593	10292.373835	-386.196269	1883	1818	-29.5904	7924.66	-326	-3.9227713238025	8.31383842294798e-06	-5.02396734394883	7.42142954142439e-14
23090000	23092000	AT1G62400	yes	Chr1	23090242	23091589	0.782729	0.745878	23072000	23074000	AT1G62370	yes	Chr1	23072574	23073189	0.504688	0.963288	3500	interaction114423	1-23090000	+	3052	1-23072000	+	1805	17773	35	0.069862	-93.421206	0	7	0.069862	700	-9.408679	1996	1032	-29.547	2800	-34	2.96224817826999	7.2980831647997e-37	-2.90958131174749	7.91577089499298e-23
4862000	4864000	AT1G14230	NA	Chr1	4861265	4864094	0.811595	0.818111	4858000	4860000	AT1G14220	yes	Chr1	4858641	4859601	2.39879	3.47103	7800	interaction25453	1-4862000	+	2182	1-4858000	+	1709	3705	78	0.069862	-267.648478	0	30	0.069862	3000	-76.103981	1022	860	-29.536	4800	-100	-0.814159055959175	5.43170103447338e-10	-4.94100930498893	9.28339906374772e-16
16026000	16028000	AT5G40030	yes	Chr5	16026226	16028283	0.699219	0.853543	16024000	16026000	AT5G40020	yes	Chr5	16022752	16024316	2.43507	2.49199	9300	interaction549852	5-16026000	+	3207	5-16024000	+	1004	2363	93	0.069862	-337.014197	0	40	0.069862	4000	-112.853681	2013	490	-29.523	5300	-126	-1.71474819868891	2.54080510122274e-07	-2.78867513752199	8.63906566305248e-14
10236000	10238000	AT1G29280	yes	Chr1	10236366	10237467	3.80834	2.6211	10222000	10224000	AT1G29250	NA	Chr1	10223265	10224727	0.753082	0.866903	2700	interaction53656	1-10236000	+	2195	1-10222000	+	1213	13733	27	0.069862	-65.791651	0	4	0.069862	400	-3.970088	825	527	-29.5101	2300	-24	-4.77598617876854	3.13439306502985e-45	-0.577003229192244	3.94829313804477e-06
24216000	24218000	AT1G65190	yes	Chr1	24215643	24217328	1.54285	2.79204	24212000	24214000	AT1G65180	yes	Chr1	24211740	24213870	2.01947	2.00283	11600	interaction120303	1-24216000	+	1482	1-24212000	+	3307	3786	116	0.069862	-444.249415	0	55	0.069862	5500	-171.005536	863	2182	-29.5095	6100	-166	4.18170776998869	1.82310101554792e-78	-2.29343171082555	2.00621168057258e-30
2342000	2344000	AT5G07400	yes	Chr5	2340641	2345458	0.705946	0.673439	2338000	2340000	AT5G07390	NA	Chr5	2335894	2339913	0.597241	0.644617	5900	interaction480392	5-2342000	+	1393	5-2338000	+	2444	3802	59	0.069862	-186.72157	0	19	0.069862	1900	-40.518032	676	1076	-29.4576	4000	-70	-1.06104584228536	1.66510372496152e-07	-6.31854655188618	5.91208232685293e-68
8284000	8286000	AT2G19110	yes	Chr2	8278880	8286445	1.07566	0.768982	8262000	8264000	AT2G19080	yes	Chr2	8262749	8264964	0.886668	0.814598	2400	interaction192422	2-8284000	+	2541	2-8262000	+	1381	21940	24	0.069862	-55.928643	0	3	0.069862	300	-2.523403	1533	800	-29.4479	2100	-20	-2.12686116805488	3.3229148573494e-66	-0.23856157791748	0.00927640016418426
18668000	18670000	AT2G45270	NA	Chr2	18666525	18669873	0.689962	0.659051	18656000	18658000	AT2G45240	NA	Chr2	18655938	18659077	0.698089	0.629506	2400	interaction247025	2-18668000	+	1479	2-18656000	+	2224	11980	24	0.069862	-55.916335	0	3	0.069862	300	-2.523376	815	1194	-29.4434	2100	-20	1.99921977859447	1.18367471152257e-58	-0.28665047979843	0.000917630752637609
17074000	17076000	AT5G42630	yes	Chr5	17073778	17075856	4.44882	4.1512	17070000	17072000	AT5G42620	yes	Chr5	17066277	17071963	0.92354	0.808133	5300	interaction555311	5-17074000	+	1055	5-17070000	+	2193	4219	53	0.069862	-162.591969	0	16	0.069862	1600	-31.863589	424	1205	-29.439	3700	-60	-4.0130669371467	1.80087159420748e-13	0.28012148541272	0.00173022325011368
9280000	9282000	AT3G25560	NA	Chr3	9279512	9282860	0.71808	0.697404	9272000	9274000	AT3G25530	NA	Chr3	9271799	9273615	0.823986	0.748324	2700	interaction301002	3-9280000	+	1113	3-9272000	+	2204	8078	27	0.069862	-65.816159	0	4	0.069862	400	-3.969039	635	1198	-29.4319	2300	-24	-1.22344041882509	1.36026236328413e-10	0.82339368800929	1.10310589065345e-07
18112000	18114000	AT2G43690	NA	Chr2	18112588	18114583	0.615244	0.592286	18110000	18112000	AT2G43680	NA	Chr2	18108348	18111831	0.671615	0.689652	14900	interaction244245	2-18112000	+	2427	2-18110000	+	2012	2172	149	0.069862	-606.549601	0	78	0.069862	7800	-268.75795	1218	1054	-29.4209	7100	-226	0.589157430400637	0.0110367661735828	-0.365056173405015	0.0123096961480184
13840000	13842000	AT2G32620	yes	Chr2	13840743	13844324	2.21868	2.60634	13836000	13838000	AT2G32610	yes	Chr2	13836233	13839513	2.38314	2.91109	14900	interaction221345	2-13840000	+	2036	2-13836000	+	2088	4247	149	0.069862	-606.482522	0	78	0.069862	7800	-268.583447	1155	1121	-29.4045	7100	-226	-6.0896286570664	3.04853691333378e-17	-5.04225136228166	1.39632170723707e-14
3696000	3698000	AT1G11080	yes	Chr1	3694671	3698013	2.96174	2.24063	3692000	3694000	AT1G11070	yes	Chr1	3690211	3693648	0.776178	0.860855	9200	interaction19532	1-3696000	+	1692	1-3692000	+	1900	3779	92	0.069862	-330.640807	0	39	0.069862	3900	-108.450545	847	964	-29.3962	5300	-122	1.62373708776485	7.344961267774e-10	-0.979147264489635	0.00278702229066822
644000	646000	AT4G01510	yes	Chr4	642732	644336	0.948953	0.858936	626000	628000	AT4G01480	yes	Chr4	626117	628055	0.772016	0.81601	2700	interaction377279	4-644000	+	1868	4-626000	+	1372	17939	27	0.069862	-65.760092	0	4	0.069862	400	-3.968411	1062	724	-29.3853	2300	-24	0.717056400187999	0.000308878998201304	-3.69910663265754	3.69337080842072e-47
10494000	10496000	AT4G19190	NA	Chr4	10493246	10496160	0.750304	0.741329	10490000	10492000	AT4G19185	NA	Chr4	10489041	10491671	0.67978	0.672867	14500	interaction427002	4-10494000	+	2346	4-10490000	+	2293	4088	145	0.069862	-585.616561	0	75	0.069862	7500	-254.948418	1544	1330	-29.368	7000	-218	0.320012237537652	0.00766985425735851	-0.82813758074966	6.56451571616903e-17
13706000	13708000	AT2G32270	yes	Chr2	13704220	13706860	3.18057	2.95026	13694000	13696000	AT2G32250	NA	Chr2	13693104	13697154	0.671041	0.672511	2700	interaction220638	2-13706000	+	1957	2-13694000	+	1987	12128	27	0.069862	-65.688336	0	4	0.069862	400	-3.967985	800	1223	-29.3539	2300	-24	-5.63598711371573	1.50995294574339e-57	-0.371536630747431	0.0283681239286089
9358000	9360000	AT4G16620	NA	Chr4	9358116	9360060	0.649528	0.650859	9352000	9354000	AT4G16600	yes	Chr4	9350038	9352707	1.69735	0.953329	10000	interaction421274	4-9358000	+	1909	4-9352000	+	2121	5709	100	0.069862	-367.317052	0	44	0.069862	4400	-127.101665	1135	1307	-29.3284	5600	-136	-1.58424682805697	4.38339655430636e-08	-4.8353905282469	2.2980863789324e-27
218000	220000	AT5G01560	NA	Chr5	218137	220530	0.660704	0.732454	216000	218000	AT5G01550	NA	Chr5	214516	216583	0.702168	0.721498	10553.45474	interaction469236	5-218000	+	3202	5-216000	+	1747	2225	106	0.070171	-395.758352	0	48	0.069862	4800	-142.733295	1681	1018	-29.3234	5753.45	-148	0.531435007330307	0.00413742222990312	-2.15847636200518	0.00630770971939095
9586000	9588000	AT4G17040	NA	Chr4	9585704	9589362	0.813661	0.781989	9582000	9584000	AT4G17030	yes	Chr4	9581585	9583290	3.0992	2.47088	5500	interaction422365	4-9586000	+	1176	4-9582000	+	1040	4738	55	0.069862	-170.71145	0	17	0.069862	1700	-34.678015	649	530	-29.3056	3800	-64	2.19909964454827	2.29954764464599e-211	-0.848070764016508	2.95092032167514e-05
2128000	2130000	AT5G06850	yes	Chr5	2126974	2130443	0.827794	0.874847	2122000	2124000	AT5G06839	yes	Chr5	2120526	2126456	3.52556	3.17815	6400	interaction479289	5-2128000	+	2968	5-2122000	+	1551	5603	64	0.069862	-207.430297	0	22	0.069862	2200	-49.761854	1571	636	-29.2388	4200	-76	-1.46258962535825	1.2125736707971e-17	-5.63718803592372	2.1272781100081e-65
5832000	5834000	AT1G17060	yes	Chr1	5832096	5835456	1.48457	1.18142	5830000	5832000	AT1G17050	NA	Chr1	5829079	5831343	0.768443	0.726811	15900	interaction30726	1-5832000	+	1543	1-5830000	+	1622	1968	159	0.069862	-659.735942	0	86	0.069862	8600	-305.942881	784	809	-29.2377	7300	-246	-1.25518453984824	2.73587378416452e-06	1.31969858926149	3.08951939405354e-12
25428000	25430000	AT1G67820	yes	Chr1	25429852	25431564	1.01878	0.677028	25426000	25428000	AT1G67810	yes	Chr1	25426487	25427349	3.10571	1.62023	3800	interaction126850	1-25428000	+	361	1-25426000	+	1694	1910	38	0.069862	-105.859452	0	9	0.069862	900	-13.896691	146	675	-29.2338	2900	-38	-0.716592018747302	0.0474726120411193	-2.88276254645573	8.40356807109229e-10
5782000	5784000	AT3G16940	NA	Chr3	5781774	5786280	0.81203	0.741419	5776000	5778000	AT3G16920	yes	Chr3	5776485	5777889	3.17709	3.51703	5900	interaction282223	3-5782000	+	2438	3-5776000	+	1983	6100	59	0.069862	-186.35946	0	19	0.069862	1900	-40.468998	1328	858	-29.2012	4000	-68	-0.347356968031351	0.0141641592710621	-1.78588976939552	1.7724182774761e-05
18212000	18214000	AT3G49140	NA	Chr3	18211862	18215619	0.881076	0.768867	18208000	18210000	AT3G49120	yes	Chr3	18207650	18210132	2.59566	1.79998	10800	interaction346974	3-18212000	+	2515	3-18208000	+	1249	3404	108	0.069862	-406.601269	0	50	0.069862	5000	-151.552826	1408	579	-29.1995	5800	-152	2.60196155469816	6.84298919770745e-180	-2.54873822910331	3.33574518789813e-07
22848000	22850000	AT1G61840	yes	Chr1	22847388	22849833	2.60548	3.11697	22832000	22834000	AT1G61810	yes	Chr1	22830014	22834728	2.15741	1.28073	1700	interaction113094	1-22848000	+	1868	1-22832000	+	576	16398	17	0.069862	-34.659454	0	1	0.069862	100	-0.457576	820	265	-29.1873	1600	-12	-4.67492372188926	3.89968387289612e-58	-2.20305351312886	6.01289213352499e-34
13940000	13942000	AT2G32860	yes	Chr2	13940186	13943804	3.12515	3.34328	13936000	13938000	AT2G32850	yes	Chr2	13935185	13938845	0.833949	0.82751	8596.792908	interaction221885	2-13940000	+	2340	2-13936000	+	2464	3697	89	0.072326	-316.299262	0	35	0.069862	3500	-93.603681	1145	1495	-29.1796	5096.79	-118	5.43132588266453	3.50204992116579e-69	-0.367552356295812	0.0164482436155118
27842000	27844000	AT1G74040	NA	Chr1	27842170	27845776	0.721075	0.598771	27838000	27840000	AT1G74030	NA	Chr1	27839183	27841939	0.666165	0.683322	10400	interaction138823	1-27842000	+	2388	1-27838000	+	1771	3440	104	0.069862	-386.2761	0	47	0.069862	4700	-138.869687	1312	968	-29.1561	5700	-144	1.64600723771224	1.10106238382655e-24	-1.99888757605918	1.34435422921078e-25
6888000	6890000	AT4G11320	yes	Chr4	6887253	6889059	3.08847	1.89685	6882000	6884000	AT4G11310	yes	Chr4	6883550	6885517	3.38146	3.14679	6000	interaction407985	4-6888000	+	1859	4-6882000	+	948	5038	60	0.069862	-191.457314	0	20	0.069862	2000	-43.667252	817	458	-29.1485	4000	-70	-4.71419400996509	2.35464067254613e-17	-3.72018927404327	1.7826154608648e-07
1266000	1268000	AT5G04470	yes	Chr5	1266624	1267416	1.65605	0.942458	1262000	1264000	AT5G04460	yes	Chr5	1259530	1264025	0.731995	0.753503	8500	interaction474602	5-1266000	+	1118	5-1262000	+	2023	3592	85	0.069862	-299.957012	0	35	0.069862	3500	-94.213896	520	980	-29.1471	5000	-112	-2.46491441937004	2.08295568662987e-18	-0.477458808130472	3.76212675297692e-07
5440000	5442000	AT3G16030	NA	Chr3	5439608	5442802	0.649547	0.553923	5436000	5438000	AT3G16010	NA	Chr3	5434013	5436264	0.706275	0.646692	6600	interaction280511	3-5440000	+	2223	3-5436000	+	1573	4114	66	0.069862	-215.859148	0	23	0.069862	2300	-52.829981	1328	879	-29.146	4300	-80	-0.977337297180693	0.00155456960912964	0.610458183254102	0.000157789116957209
192000	194000	AT2G01440	NA	Chr2	193700	199248	0.779379	0.662946	188000	190000	AT2G01430	yes	Chr2	187797	190369	3.06119	2.30766	5600	interaction152219	2-192000	+	1754	2-188000	+	663	4383	56	0.069862	-175.643257	0	18	0.069862	1800	-37.750685	1058	340	-29.1367	3800	-64	0.769446534858115	8.63117336134541e-14	-3.56901572828836	3.44312930276838e-18
12054000	12056000	AT2G28270	yes	Chr2	12053541	12054398	1.29038	1.74163	12046000	12048000	AT2G28250	NA	Chr2	12043481	12046537	0.586311	0.676669	5900	interaction211896	2-12054000	+	2424	2-12046000	+	1716	8227	59	0.069862	-186.492112	0	19	0.069862	1900	-40.454042	1156	935	-29.1239	4000	-68	-6.92204741112679	1.29172120724434e-16	-2.6556539712153	2.8491713191348e-43
10246000	10248000	AT1G29300	NA	Chr1	10247779	10249594	0.643777	0.685614	10244000	10246000	AT1G29290	yes	Chr1	10244965	10245572	1.97106	1.83513	4500	interaction53718	1-10246000	+	661	1-10244000	+	1108	1587	45	0.069862	-131.568592	0	12	0.069862	1200	-21.058432	372	405	-29.1089	3300	-48	-2.69048118849194	1.03067192293624e-10	-3.19393873270419	7.57763474361409e-13
16216000	16218000	AT2G38800	NA	Chr2	16216998	16219159	0.650693	0.798031	16212000	16214000	AT2G38780	NA	Chr2	16210856	16214232	0.778323	0.694641	6000	interaction234248	2-16216000	+	986	2-16212000	+	1955	3766	60	0.069862	-191.384642	0	20	0.069862	2000	-43.65739	470	1013	-29.1001	4000	-70	-2.11829279436532	1.4463351765747e-15	2.10497310834028	9.19043891472505e-41
23788000	23790000	AT5G58910	yes	Chr5	23789521	23791681	3.6768	3.85973	23766000	23768000	AT5G58860	yes	Chr5	23765813	23768049	4.74521	5.49632	1700	interaction589310	5-23788000	+	884	5-23766000	+	4257	22230	17	0.069862	-34.585294	0	1	0.069862	100	-0.45788	366	2053	-29.0886	1600	-12	-5.37801979691079	1.71062466156149e-17	-5.51429566127232	1.42880104949855e-37
14614000	14616000	AT2G34670	NA	Chr2	14612580	14615795	0.581607	0.642577	14610000	14612000	AT2G34660	NA	Chr2	14602469	14612565	0.706251	0.649278	14000	interaction225852	2-14614000	+	1078	2-14610000	+	3432	3252	140	0.069862	-565.527279	0	73	0.069862	7300	-248.367287	647	1969	-29.0844	6700	-212	-0.668626362679251	0.000129653435953685	-0.762731857387692	0.0297161577082012
16828000	16830000	AT4G35390	yes	Chr4	16829325	16830692	3.59242	1.78552	16822000	16824000	AT4G35380	NA	Chr4	16819882	16826061	0.576133	0.639635	8978.130377	interaction459918	4-16828000	+	2093	4-16822000	+	3438	6435	116	0.090264	-442.896714	0	38	0.069862	3800	-104.775593	813	2083	-29.0693	5178.13	-166	-4.28802870254628	1.81072416419395e-50	-4.78979879113048	3.28501968304002e-89
11532000	11534000	AT2G27030	NA	Chr2	11532003	11534333	0.93777	0.858078	11526000	11528000	AT2G27010	yes	Chr2	11526167	11527854	0.711995	0.707425	3200	interaction209229	2-11532000	+	946	2-11526000	+	3358	5571	32	0.069862	-83.025156	0	6	0.069862	600	-7.452287	433	1646	-29.0644	2600	-30	-0.301581967207782	0.0298853180740203	-5.39978231616114	1.35432885799268e-28
21950000	21952000	AT5G54090	NA	Chr5	21948123	21952550	0.71066	0.704449	21946000	21948000	AT5G54080	NA	Chr5	21945868	21948913	0.667123	0.72905	11500	interaction580066	5-21950000	+	1187	5-21946000	+	2469	3720	115	0.069862	-440.563983	0	55	0.069862	5500	-171.511965	669	1353	-29.0518	6000	-164	0.818382987930109	5.89265005607e-05	0.295368505027109	0.0377816758106918
20246000	20248000	AT1G54220	NA	Chr1	20246036	20250310	0.800406	0.730565	20244000	20246000	AT1G54217	NA	Chr1	20243920	20245527	0.780874	0.705834	3900	interaction99903	1-20246000	+	1012	1-20244000	+	932	2308	39	0.069862	-108.372417	0	9	0.069862	900	-13.753247	513	549	-29.0428	3000	-40	0.429035159348802	0.04314774015332	-0.814652755836281	2.08914778636744e-06
582000	584000	AT5G02590	NA	Chr5	583085	584179	0.696051	0.775566	574000	576000	AT5G02560	NA	Chr5	575381	576606	0.98891	0.958112	1700	interaction470926	5-582000	+	947	5-574000	+	1243	8040	17	0.069862	-34.576107	0	1	0.069862	100	-0.458022	446	640	-29.0425	1600	-12	1.1257213573849	2.48522606546894e-07	-0.729292274958915	0.00596424792951134
22224000	22226000	AT3G60160	yes	Chr3	22223802	22229204	0.471749	0.459362	22216000	22218000	AT3G60140	yes	Chr3	22216671	22220824	3.42366	1.93579	3900	interaction368170	3-22224000	+	2216	3-22216000	+	1224	7934	39	0.069862	-108.187629	0	9	0.069862	900	-13.753138	1220	514	-29.0411	3000	-40	2.29476544258446	7.38614888568145e-06	-2.57645471903477	0.00222271293859968
5840000	5842000	AT5G17710	yes	Chr5	5839342	5841728	0.884426	0.820793	5832000	5834000	AT5G17700	yes	Chr5	5830580	5833901	2.51642	2.89521	6900	interaction498903	5-5840000	+	1385	5-5832000	+	3106	7898	69	0.069862	-228.849898	0	25	0.069862	2500	-59.369134	692	1719	-29.0281	4400	-84	1.67092783341888	1.50270247152514e-34	2.11506852771364	1.43936687797693e-19
8812000	8814000	AT3G24310	yes	Chr3	8811130	8812364	0.993493	0.819935	8804000	8806000	AT3G24300	yes	Chr3	8805630	8807388	2.83058	3.66072	1700	interaction298582	3-8812000	+	1417	3-8804000	+	1039	7290	17	0.069862	-34.564704	0	1	0.069862	100	-0.458079	532	488	-29.0245	1600	-12	-5.32193575608678	8.4510360278859e-20	-5.43632854005153	7.97428379867025e-45
8942000	8944000	AT1G25460	NA	Chr1	8942810	8944244	0.819392	0.851817	8940000	8942000	AT1G25450	yes	Chr1	8938478	8940387	2.07413	2.51303	6300	interaction46694	1-8942000	+	2016	1-8940000	+	653	2211	63	0.069862	-204.990371	0	22	0.069862	2200	-49.976127	1118	391	-29.0168	4100	-76	-1.50565038020354	0.000287784327883827	2.31229351428659	2.35946221461171e-70
18646000	18648000	AT2G45220	yes	Chr2	18644083	18646447	3.80827	3.51542	18642000	18644000	AT2G45210	yes	Chr2	18641565	18642704	2.46541	1.9262	5100	interaction246905	2-18646000	+	1154	2-18642000	+	1202	4123	51	0.069862	-154.468583	0	15	0.069862	1500	-29.021012	497	524	-29.0093	3600	-56	-3.87216636001235	3.92521134248721e-60	-2.83931428153239	3.19174029693454e-10
20524000	20526000	AT1G55020	yes	Chr1	20525707	20530273	1.02327	0.829231	20510000	20512000	AT1G54990	NA	Chr1	20511518	20513681	0.769519	0.845729	1700	interaction101383	1-20524000	+	1225	1-20510000	+	1339	13980	17	0.069862	-34.546909	0	1	0.069862	100	-0.458216	634	682	-28.9805	1600	-12	-2.41885096809196	4.40206271238639e-63	-1.11213301116886	8.52601592539206e-15
16324000	16326000	AT2G39130	NA	Chr2	16322955	16327266	0.787729	0.725008	16302000	16304000	AT2G39050	yes	Chr2	16303402	16305629	0.804816	0.962513	1700	interaction234855	2-16324000	+	1506	2-16302000	+	1477	21394	17	0.069862	-34.529979	0	1	0.069862	100	-0.458224	738	645	-28.978	1600	-12	-0.913691800318874	9.43225864190793e-17	-2.22985326512304	1.44696188786771e-05
19208000	19210000	AT2G46750	yes	Chr2	19208319	19210958	4.33595	3.92432	19192000	19194000	AT2G46710	NA	Chr2	19191934	19194849	0.939755	0.882381	1700	interaction249517	2-19208000	+	2952	2-19192000	+	1174	16463	17	0.069862	-34.551224	0	1	0.069862	100	-0.458225	1152	647	-28.9775	1600	-12	-5.48862639327275	2.85072547420192e-43	1.87498101787838	4.31034578575615e-38
18950000	18952000	AT1G51160	yes	Chr1	18949590	18951783	0.859879	0.836894	18936000	18938000	AT1G51110	NA	Chr1	18935328	18937665	0.774405	0.619688	1700	interaction93550	1-18950000	+	1373	1-18936000	+	1531	14265	17	0.069862	-34.536209	0	1	0.069862	100	-0.458254	692	1050	-28.9682	1600	-12	-0.227681912847798	0.0132871032122046	6.919484126273	5.07988808700103e-191
10454000	10456000	AT2G24600	yes	Chr2	10452115	10454524	1.12093	0.988311	10444000	10446000	AT2G24580	yes	Chr2	10444789	10446242	1.03721	0.856561	1700	interaction203755	2-10454000	+	1280	2-10444000	+	1620	9382	17	0.069862	-34.542642	0	1	0.069862	100	-0.458256	695	760	-28.9676	1600	-12	2.85683388790015	4.64675031791423e-07	-1.83861593629258	2.78451674473762e-09
5570000	5572000	AT3G16410	yes	Chr3	5571991	5574541	2.33482	2.54081	5566000	5568000	AT3G16400	yes	Chr3	5566085	5568545	2.21919	1.09908	4500	interaction281117	3-5570000	+	1570	3-5566000	+	1099	4244	45	0.069862	-130.975575	0	12	0.069862	1200	-21.043632	520	412	-28.9615	3300	-48	-4.06210710584225	3.8050475675441e-40	-1.46013210206601	0.00197838312226521
14294000	14296000	AT2G33790	yes	Chr2	14293560	14295271	3.93656	4.37501	14272000	14274000	AT2G33750	yes	Chr2	14271709	14273385	0.721945	0.851393	1700	interaction223962	2-14294000	+	1750	2-14272000	+	2013	22269	17	0.069862	-34.51716	0	1	0.069862	100	-0.45828	736	1119	-28.9601	1600	-12	-6.01611674207717	2.00087111638882e-31	3.73515045131703	1.71276281917709e-15
16380000	16382000	AT3G44860	yes	Chr3	16379632	16381070	1.37228	2.69298	16364000	16366000	AT3G44820	yes	Chr3	16361369	16364610	0.862371	0.912767	1700	interaction336683	3-16380000	+	1876	3-16364000	+	1099	16028	17	0.069862	-34.558302	0	1	0.069862	100	-0.458296	1107	767	-28.9551	1600	-12	2.47720124732141	0.0224671347235458	0.58352694234468	0.0432899566510181
27584000	27586000	AT1G73370	NA	Chr1	27584424	27588464	0.66304	0.700346	27580000	27582000	AT1G73360	NA	Chr1	27578695	27582521	0.621655	0.577839	10100	interaction137613	1-27584000	+	1774	1-27580000	+	2289	4522	101	0.069862	-372.190542	0	45	0.069862	4500	-130.978813	1095	1316	-28.9485	5600	-138	-0.808889500521918	0.00232819124155138	1.68610745005568	1.05162701224943e-11
23028000	23030000	AT1G62305	yes	Chr1	23026775	23029339	0.828361	0.784203	22998000	23000000	AT1G62260	yes	Chr1	22997825	22999796	0.743904	0.732678	1700	interaction114066	1-23028000	+	1815	1-22998000	+	2878	29966	17	0.069862	-34.514678	0	1	0.069862	100	-0.458352	900	1478	-28.9372	1600	-12	-0.560320418818617	0.000302635447817965	-0.578347262017796	0.00600262599986917
20680000	20682000	AT1G55390	yes	Chr1	20680875	20683043	2.49412	2.42857	20658000	20660000	AT1G55350	NA	Chr1	20653819	20665095	0.777684	0.699944	1700	interaction102343	1-20680000	+	3557	1-20658000	+	1541	22234	17	0.069862	-34.526564	0	1	0.069862	100	-0.45836	1883	923	-28.9346	1600	-12	-2.98900465906309	1.96115367517886e-13	0.410675758769797	0.0376780767945445
5596000	5598000	AT3G16470	NA	Chr3	5595928	5599224	0.795144	0.84749	5590000	5592000	AT3G16450	yes	Chr3	5588393	5590055	3.42818	3.68913	4100	interaction281314	3-5596000	+	1950	3-5590000	+	1236	6086	41	0.069862	-115.648935	0	10	0.069862	1000	-16.088992	900	464	-28.9297	3100	-42	-1.13606916250919	0.0117718248793701	-3.26200979429494	9.57923125397121e-16
2500000	2502000	AT4G04920	yes	Chr4	2497643	2505535	0.660395	0.702013	2462000	2464000	AT4G04870	NA	Chr4	2461673	2464143	0.643027	0.77319	1700	interaction387133	4-2500000	+	2016	4-2462000	+	2342	37914	17	0.069862	-34.508019	0	1	0.069862	100	-0.458448	1282	1402	-28.9066	1600	-12	-0.657397460618704	2.9838677288452e-12	-0.367807249544873	0.0295481583482395
22252000	22254000	AT5G54790	yes	Chr5	22253985	22255663	4.24073	3.6353	22250000	22252000	AT5G54780	yes	Chr5	22248446	22251863	0.890628	0.781631	6300	interaction581488	5-22252000	+	766	5-22250000	+	1631	1614	63	0.069862	-204.535138	0	22	0.069862	2200	-50.078152	331	842	-28.9047	4100	-76	-5.58621987120568	7.2936644026329e-19	-1.35222917636632	2.18667256645124e-21
90000	92000	AT3G01300	NA	Chr3	90597	93585	0.725593	0.707212	88000	90000	AT3G01290	yes	Chr3	88053	89422	1.13607	1.04074	4900	interaction252410	3-90000	+	1216	3-88000	+	1167	2333	49	0.069862	-146.526781	0	14	0.069862	1400	-26.286322	727	484	-28.9024	3500	-54	-0.674955594899756	0.00026212882749531	-2.29013040450106	3.82800100579559e-10
14762000	14764000	AT4G30170	yes	Chr4	14762840	14764627	3.7265	3.25773	14756000	14758000	AT4G30160	NA	Chr4	14753348	14760189	0.894723	0.747353	4900	interaction449328	4-14762000	+	1440	4-14756000	+	1553	5991	49	0.069862	-146.33853	0	14	0.069862	1400	-26.283301	493	735	-28.8786	3500	-54	-5.06996518156847	1.12933663722793e-88	-0.442386708423899	4.16118121638216e-08
19148000	19150000	AT2G46640	yes	Chr2	19148661	19151080	3.99661	4.11888	19146000	19148000	AT2G46630	yes	Chr2	19145528	19146713	3.4804	3.74369	5800	interaction249311	2-19148000	+	1532	2-19146000	+	951	2232	58	0.069862	-183.154042	0	19	0.069862	1900	-40.631887	718	454	-28.8543	3900	-68	6.47675326494906	8.97391535079424e-45	-0.427544885861748	0.000441611010069704
17974000	17976000	AT2G43240	NA	Chr2	17970858	17975867	0.758498	0.713018	17962000	17964000	AT2G43210	NA	Chr2	17960699	17963727	0.764911	0.816442	3900	interaction243498	2-17974000	+	1196	2-17962000	+	2240	11951	39	0.069862	-108.201391	0	9	0.069862	900	-13.740384	666	1040	-28.8468	3000	-40	-0.353788386890297	0.027132647610688	-0.352136851448454	0.000300566112449552
18192000	18194000	AT5G45080	yes	Chr5	18191574	18193207	1.8819	3.13086	18188000	18190000	AT5G45070	yes	Chr5	18187629	18189431	1.3932	2.22094	4900	interaction560802	5-18192000	+	1002	5-18188000	+	1606	3934	49	0.069862	-146.691161	0	14	0.069862	1400	-26.277274	512	916	-28.8312	3500	-54	-6.36155304727234	3.52331272287941e-34	-6.33299716404196	4.34313998102722e-33
7652000	7654000	AT3G21720	yes	Chr3	7652486	7656011	4.12039	4.87714	7646000	7648000	AT3G21700	yes	Chr3	7644349	7646383	1.07156	0.932933	9000	interaction292924	3-7652000	+	2254	3-7646000	+	2103	6566	90	0.069862	-321.031522	0	38	0.069862	3800	-104.660607	1091	941	-28.8231	5200	-120	-2.79286161010035	9.56670464194467e-06	-0.69179506826022	0.00633113776369986
22156000	22158000	AT5G54540	NA	Chr5	22156497	22158054	0.83951	0.838532	22152000	22154000	AT5G54530	yes	Chr5	22152724	22154429	0.982513	2.15777	4900	interaction581000	5-22156000	+	1932	5-22152000	+	894	4096	49	0.069862	-146.832255	0	14	0.069862	1400	-26.273987	1101	523	-28.8055	3500	-54	0.514938520062283	7.00927996501806e-05	1.27905074769094	0.00020060567538818
24496000	24498000	AT1G65850	yes	Chr1	24494677	24498542	2.76792	3.11791	24490000	24492000	AT1G65840	NA	Chr1	24489779	24493024	0.814051	0.79756	3200	interaction121862	1-24496000	+	1005	1-24490000	+	1365	6351	32	0.069862	-82.995592	0	6	0.069862	600	-7.443801	669	685	-28.8039	2600	-30	-3.47513727859896	2.95833870147107e-08	-1.46295139551727	4.7618966785732e-15
14574000	14576000	AT2G34610	yes	Chr2	14575391	14576517	1.75916	2.17099	14570000	14572000	AT2G34590	NA	Chr2	14568810	14570969	0.821829	0.718119	3200	interaction225648	2-14574000	+	1181	2-14570000	+	1417	4940	32	0.069862	-82.92512	0	6	0.069862	600	-7.443438	685	782	-28.7928	2600	-30	-4.48219714468961	3.22496641263158e-12	0.703678954405171	2.25881106381046e-05
4846000	4848000	AT1G14180	NA	Chr1	4847161	4849207	0.717262	0.644963	4844000	4846000	AT1G14170	NA	Chr1	4843233	4845847	0.823792	0.999663	11700	interaction25351	1-4846000	+	2024	1-4844000	+	2201	2080	117	0.069862	-447.828507	0	56	0.069862	5600	-174.717352	1123	1094	-28.7834	6100	-166	0.70128890925403	3.24252131602754e-05	-1.68783900200605	2.20727368999618e-08
12712000	12714000	AT2G29760	NA	Chr2	12712883	12715852	0.755332	0.805679	12710000	12712000	AT2G29750	yes	Chr2	12709726	12711696	1.48992	1.46543	12100	interaction215471	2-12712000	+	1613	2-12710000	+	2955	2247	121	0.069862	-468.14323	0	59	0.069862	5900	-187.30721	944	1394	-28.7833	6200	-174	0.611068738894529	0.000781117234182585	-5.7176264445045	2.48989559778311e-43
7654000	7656000	AT3G21720	yes	Chr3	7652486	7656011	4.12039	4.87714	7644000	7646000	AT3G21700	yes	Chr3	7644349	7646383	1.07156	0.932933	6900	interaction292940	3-7654000	+	2551	3-7644000	+	1704	9714	69	0.069862	-228.532119	0	25	0.069862	2500	-59.299893	1222	833	-28.7793	4400	-84	-2.79286161010035	9.56670464194467e-06	-0.69179506826022	0.00633113776369986
22712000	22714000	AT5G56080	yes	Chr5	22711401	22712364	4.05784	5.68534	22700000	22702000	AT5G56050	yes	Chr5	22700961	22702116	1.24662	0.729519	3200	interaction583814	5-22712000	+	1424	5-22700000	+	1518	11749	32	0.069862	-82.85668	0	6	0.069862	600	-7.442601	725	869	-28.7674	2600	-30	-5.80147458511886	1.91439367527699e-05	-1.48191498972585	0.000564083699372897
4850000	4852000	AT1G14185	NA	Chr1	4850273	4852096	0.59072	0.654349	4846000	4848000	AT1G14180	NA	Chr1	4847161	4849207	0.717262	0.644963	13103.074682	interaction25376	1-4850000	+	2835	1-4846000	+	2024	3398	135	0.071979	-536.082219	0	66	0.069862	6600	-216.408052	1354	1123	-28.7596	6503.07	-200	-3.08515782708046	1.45284032983534e-36	0.70128890925403	3.24252131602754e-05
9648000	9650000	AT2G22690	NA	Chr2	9649689	9651439	0.768303	0.803399	9646000	9648000	AT2G22680	yes	Chr2	9645312	9647613	0.958687	0.780785	8100	interaction199876	2-9648000	+	826	2-9646000	+	2075	2068	81	0.069862	-283.015527	0	33	0.069862	3300	-87.425699	366	1069	-28.7482	4800	-106	-0.461485337245974	0.0140033115968207	-2.39968897223116	4.89047353822512e-21
29964000	29966000	AT1G79630	NA	Chr1	29962644	29965795	0.678144	0.695416	29960000	29962000	AT1G79620	NA	Chr1	29957561	29962305	0.554147	0.596723	20293.159757	interaction149185	1-29964000	+	1785	1-29960000	+	3321	3670	216	0.074361	-963.108265	0	122	0.069862	12200	-476.967289	890	2155	-28.7412	8093.16	-360	-0.694564767196932	5.19559191237027e-06	-0.974573288831806	1.25866340577251e-08
5590000	5592000	AT3G16450	yes	Chr3	5588393	5590055	3.42818	3.68913	5586000	5588000	AT3G16440	yes	Chr3	5585943	5587750	3.57843	4.23229	2900	interaction281262	3-5590000	+	1236	3-5586000	+	802	2885	29	0.069862	-72.701161	0	5	0.069862	500	-5.636307	464	244	-28.7405	2400	-26	-3.26200979429494	9.57923125397121e-16	-5.8500611369739	5.9747820537492e-31
4798000	4800000	AT3G14370	yes	Chr3	4797844	4799504	3.27618	2.57283	4794000	4796000	AT3G14362	yes	Chr3	4793677	4794417	2.20209	1.95952	9700	interaction277265	3-4798000	+	2116	3-4794000	+	1251	3628	97	0.069862	-354.688877	0	43	0.069862	4300	-123.856111	988	655	-28.7137	5400	-132	-2.24284508992445	1.22080187020158e-10	-4.66583018187383	5.91063444311261e-13
2050000	2052000	AT5G06670	NA	Chr5	2048242	2055019	0.71733	0.682193	2038000	2040000	AT5G06640	yes	Chr5	2039858	2041928	1.06086	1.74093	3200	interaction478856	5-2050000	+	2410	5-2038000	+	1710	11899	32	0.069862	-82.801212	0	6	0.069862	600	-7.440481	1529	851	-28.7033	2600	-30	1.36365947363931	1.3797081618539e-28	-5.57918290968677	6.7606453549426e-40
22920000	22922000	AT5G56620	yes	Chr5	22918520	22921139	4.18786	4.73224	22916000	22918000	AT5G56610	yes	Chr5	22916709	22918338	1.0384	0.961903	8800	interaction584946	5-22920000	+	1537	5-22916000	+	1516	3422	88	0.069862	-312.67091	0	37	0.069862	3700	-101.16517	745	835	-28.6972	5100	-116	-2.5857416568358	1.70234643041092e-12	-1.79598013221816	6.4177121006573e-09
3216000	3218000	AT1G09890	yes	Chr1	3214236	3217538	1.31196	1.1841	3210000	3212000	AT1G09880	yes	Chr1	3208827	3211653	0.648254	0.618039	15512.060812	interaction16836	1-3216000	+	2293	1-3210000	+	2928	5868	187	0.08422	-803.464803	0	84	0.069862	8400	-294.929761	1329	1718	-28.6962	7112.06	-300	-0.406699319986567	0.0278083319765644	-1.21452909728171	0.00565386755568405
3122000	3124000	AT5G09980	yes	Chr5	3122730	3123964	1.32836	1.06848	3120000	3122000	AT5G09978	yes	Chr5	3120712	3121864	2.18225	1.20706	5400	interaction484654	5-3122000	+	1384	5-3120000	+	873	2250	54	0.069862	-166.915301	0	17	0.069862	1700	-34.80252	614	346	-28.6515	3700	-62	-4.03405623609339	5.13569067070688e-31	-5.75798011373753	9.43534216953619e-28
5586000	5588000	AT3G16440	yes	Chr3	5585943	5587750	3.57843	4.23229	5578000	5580000	AT3G16420	yes	Chr3	5579385	5580953	2.04457	1.96203	2000	interaction281224	3-5586000	+	802	3-5578000	+	1691	8370	20	0.069862	-43.502644	0	2	0.069862	200	-1.330895	244	533	-28.6441	1800	-16	-5.8500611369739	5.9747820537492e-31	-1.48347976613498	0.00673681941841922
8322000	8324000	AT4G14465	yes	Chr4	8320629	8322201	4.9118	1.18567	8312000	8314000	AT4G14455	yes	Chr4	8310335	8312321	0.889029	0.812261	4300	interaction415353	4-8322000	+	1382	4-8312000	+	1954	9779	43	0.069862	-123.140251	0	11	0.069862	1100	-18.497744	559	1116	-28.6413	3200	-46	-3.11314217606891	3.22211671070818e-56	-0.68485164265565	6.8612714546234e-09
28368000	28370000	AT1G75550	yes	Chr1	28369436	28369940	1.56053	0.824571	28366000	28368000	AT1G75540	NA	Chr1	28366026	28367652	0.777565	0.679647	7000	interaction141729	1-28368000	+	1229	1-28366000	+	1543	2227	70	0.069862	-233.372228	0	26	0.069862	2600	-62.756946	573	787	-28.6393	4400	-86	0.5892455500645	0.0262515586470272	-1.60543019443755	1.67492526334857e-14
17388000	17390000	AT2G41700	NA	Chr2	17382889	17396110	0.896531	0.810558	17380000	17382000	AT2G41690	yes	Chr2	17381722	17382577	2.10666	1.83058	7400	interaction240441	2-17388000	+	2274	2-17380000	+	1998	7725	74	0.069862	-249.891932	0	28	0.069862	2800	-69.218099	1323	977	-28.6207	4600	-92	-0.207739716154084	0.00727362348910528	-3.2534891080187	9.77509296158353e-10
8234000	8236000	AT2G18980	yes	Chr2	8233334	8235316	1.41209	1.33338	8224000	8226000	AT2G18960	NA	Chr2	8221630	8227622	0.72423	0.696021	4100	interaction192177	2-8234000	+	1402	2-8224000	+	2587	9900	41	0.069862	-115.57252	0	10	0.069862	1000	-16.064703	668	1613	-28.6182	3100	-42	-5.30334569532118	1.31564213116291e-69	-0.306744815487391	0.0460319214164212
8756000	8758000	AT4G15340	yes	Chr4	8754479	8760589	3.6038	3.22206	8750000	8752000	AT4G15330	yes	Chr4	8751386	8753157	3.71587	4.2347	6000	interaction417638	4-8756000	+	1437	4-8750000	+	1924	6089	60	0.069862	-190.820007	0	20	0.069862	2000	-43.552824	652	997	-28.5956	4000	-70	-5.13487434979854	1.16503970603958e-40	-5.65947692352616	3.469458457868e-28
6728000	6730000	AT5G19900	yes	Chr5	6728159	6730045	0.697087	0.67759	6724000	6726000	AT5G19890	yes	Chr5	6724114	6725923	3.76217	4.42915	7200	interaction503894	5-6728000	+	1398	5-6724000	+	1658	4138	72	0.069862	-241.77446	0	27	0.069862	2700	-65.96135	781	749	-28.5865	4500	-90	-0.297516960024328	0.021132153800171	-4.40488192842172	0.0031676458094767
6556000	6558000	AT5G19440	NA	Chr5	6556419	6558342	0.697893	0.774932	6554000	6556000	AT5G19430	NA	Chr5	6553702	6555848	0.769285	0.740893	14500	interaction502897	5-6556000	+	2013	5-6554000	+	1985	1790	145	0.069862	-586.347013	0	76	0.069862	7600	-259.773487	1230	1108	-28.581	6900	-218	-1.30776880725694	5.80435348835814e-11	1.12747455589344	3.77454867885276e-11
6164000	6166000	AT5G18560	yes	Chr5	6164586	6165991	4.40247	5.25445	6150000	6152000	AT5G18525	NA	Chr5	6146742	6153742	0.744079	0.650883	3188.889001	interaction500801	5-6164000	+	2508	5-6150000	+	2298	14154	33	0.072297	-86.241772	0	6	0.069862	600	-7.436254	1303	1313	-28.5765	2588.89	-32	-4.95090466784806	1.45700379358607e-14	-0.63579905781438	2.15363025924927e-06
4358000	4360000	AT5G13550	NA	Chr5	4355275	4359552	0.744883	0.714172	4348000	4350000	AT5G13530	NA	Chr5	4345525	4354551	0.738737	0.697709	6666.554686	interaction491142	5-4358000	+	1607	5-4348000	+	3691	9848	71	0.074405	-237.213952	0	24	0.069862	2400	-56.086263	749	2212	-28.5677	4266.55	-88	-0.661147109376624	0.00150515018701489	-0.300733185627147	0.00363645703745587
19248000	19250000	AT1G51840	yes	Chr1	19249448	19250709	2.94154	2.86121	19244000	19246000	AT1G51830	yes	Chr1	19243024	19246010	2.23464	2.32675	5100	interaction95106	1-19248000	+	1326	1-19244000	+	1351	4160	51	0.069862	-154.326805	0	15	0.069862	1500	-28.957796	815	750	-28.562	3600	-56	-4.47906482357445	4.10692876154488e-81	-5.56694922917198	4.51836677937221e-59
22838000	22840000	AT1G61820	yes	Chr1	22835077	22838615	2.42394	1.35935	22830000	22832000	AT1G61810	yes	Chr1	22830014	22834728	2.15741	1.28073	2000	interaction113047	1-22838000	+	922	1-22830000	+	705	6906	20	0.069862	-43.532629	0	2	0.069862	200	-1.330895	382	287	-28.5551	1800	-16	-3.01394948328043	1.96511552452776e-28	-2.20305351312886	6.01289213352499e-34
17584000	17586000	AT3G47700	NA	Chr3	17583600	17586624	0.713312	0.726384	17580000	17582000	AT3G47690	NA	Chr3	17581095	17583586	0.673484	0.675944	15000	interaction343466	3-17584000	+	2633	3-17580000	+	1621	3549	150	0.069862	-613.037995	0	80	0.069862	8000	-277.806734	1720	1007	-28.5542	7000	-228	-0.485059953103303	0.000406349121079177	-0.521668099817191	0.00111164607770277
24756000	24758000	AT5G61560	NA	Chr5	24752849	24756718	0.734917	0.664903	24748000	24750000	AT5G61550	NA	Chr5	24748101	24751871	0.575546	0.594316	4500	interaction594176	5-24756000	+	934	5-24748000	+	2364	7363	45	0.069862	-131.132546	0	12	0.069862	1200	-21.000238	603	1439	-28.5378	3300	-48	2.43364734315279	4.35263534025489e-33	-5.00928233648696	7.8203289183316e-51
4046000	4048000	AT3G12730	yes	Chr3	4047071	4048614	3.92079	4.82184	4040000	4042000	AT3G12710	yes	Chr3	4040323	4041982	2.00726	1.18067	9100	interaction273300	3-4046000	+	2624	3-4040000	+	1663	5764	91	0.069862	-326.107072	0	39	0.069862	3900	-108.45564	1459	842	-28.5147	5200	-122	0.44188146943516	0.035650408530942	1.14061666246937	7.24754153488993e-17
23112000	23114000	AT1G62440	yes	Chr1	23111817	23115293	2.45246	1.88794	23106000	23108000	AT1G62430	NA	Chr1	23105940	23109476	0.874577	0.785334	4500	interaction114528	1-23112000	+	1710	1-23106000	+	1073	6124	45	0.069862	-130.997058	0	12	0.069862	1200	-20.992968	976	654	-28.4681	3300	-48	-3.29871752895392	4.93118349464032e-12	0.586408957614619	0.00947311554637318
12866000	12868000	AT4G25030	NA	Chr4	12864613	12866827	0.900579	0.949619	12860000	12862000	AT4G25020	yes	Chr4	12860633	12861975	2.35191	3.66948	4700	interaction439057	4-12866000	+	1258	4-12860000	+	1826	5510	47	0.069862	-138.615566	0	13	0.069862	1300	-23.577548	675	1101	-28.464	3400	-50	-0.954646628533292	1.82727331720447e-11	2.10923114686191	7.19004318946972e-07
27576000	27578000	AT1G73350	NA	Chr1	27575492	27577275	0.743083	0.688761	27572000	27574000	AT1G73340	NA	Chr1	27573115	27575419	0.587037	0.600993	4600	interaction137559	1-27576000	+	594	1-27572000	+	1573	3744	46	0.069862	-135.644763	0	13	0.069862	1300	-23.746084	253	710	-28.4494	3300	-50	0.569998765347621	0.0168648838037372	-5.00697609545104	1.19953109938089e-51
1800000	1802000	AT5G05980	NA	Chr5	1799489	1804492	0.7189	0.749311	1794000	1796000	AT5G05970	yes	Chr5	1795293	1799527	0.828665	0.675893	6500	interaction477621	5-1800000	+	2199	5-1794000	+	1296	5733	65	0.069862	-211.910541	0	23	0.069862	2300	-52.919833	1221	659	-28.3983	4200	-78	-0.490109108055344	0.000154004756653374	0.420747482177587	0.0154944595954016
3902000	3904000	AT1G11600	yes	Chr1	3902011	3903782	3.22801	3.51771	3888000	3890000	AT1G11580	yes	Chr1	3888689	3890811	2.77505	1.21031	4300	interaction20668	1-3902000	+	3224	1-3888000	+	1604	13609	43	0.069862	-123.052215	0	11	0.069862	1100	-18.474663	1569	777	-28.3892	3200	-46	3.72042393477981	2.28176754669768e-55	-3.75506679775764	2.59543630763846e-34
8762000	8764000	AT4G15350	yes	Chr4	8762952	8764594	2.43093	3.95792	8760000	8762000	AT4G15340	yes	Chr4	8754479	8760589	3.6038	3.22206	15000	interaction417683	4-8762000	+	2286	4-8760000	+	1804	1769	150	0.069862	-612.304267	0	80	0.069862	8000	-278.176609	1491	904	-28.3807	7000	-228	-5.64438328904151	5.00071758949592e-11	-5.13487434979854	1.16503970603958e-40
8266000	8268000	AT2G19090	NA	Chr2	8265177	8267879	0.518089	0.678266	8262000	8264000	AT2G19080	yes	Chr2	8262749	8264964	0.886668	0.814598	12300	interaction192341	2-8266000	+	2211	2-8262000	+	1381	3764	123	0.069862	-478.72946	0	61	0.069862	6100	-195.995797	1235	800	-28.3556	6200	-178	-0.664362162582762	0.000512530364796774	-0.23856157791748	0.00927640016418426
11084000	11086000	AT1G31070	yes	Chr1	11084858	11088563	1.02995	0.955763	11076000	11078000	AT1G31050	yes	Chr1	11075626	11079240	3.68366	3.5748	2000	interaction58276	1-11084000	+	1088	1-11076000	+	994	7205	20	0.069862	-43.460675	0	2	0.069862	200	-1.330894	479	501	-28.3556	1800	-16	-1.03906164390304	4.82905232107101e-11	-5.28585076621644	1.38732111211055e-128
4104000	4106000	AT3G12900	yes	Chr3	4104575	4106112	3.79681	4.96933	4092000	4094000	AT3G12860	NA	Chr3	4091569	4093921	0.646628	0.698974	2000	interaction273595	3-4104000	+	1310	3-4092000	+	752	12218	20	0.069862	-43.517125	0	2	0.069862	200	-1.330894	636	480	-28.355	1800	-16	-6.29890072606914	4.12206870265161e-25	-1.37818912018517	0.00339439260845605
10952000	10954000	AT2G25710	yes	Chr2	10952560	10955377	0.819872	0.857371	10942000	10944000	AT2G25690	yes	Chr2	10940095	10942255	0.772065	0.833565	2000	interaction206319	2-10952000	+	1634	2-10942000	+	912	10377	20	0.069862	-43.47642	0	2	0.069862	200	-1.330894	855	484	-28.3526	1800	-16	-0.517583151546029	0.00167031207360698	-0.392537049652286	0.0148297683821269
12932000	12934000	AT4G25240	NA	Chr4	12930401	12933892	0.737082	0.660525	12924000	12926000	AT4G25230	NA	Chr4	12923918	12929156	0.849337	0.767957	3400	interaction439427	4-12932000	+	2375	4-12924000	+	743	8099	34	0.069862	-90.27471	0	7	0.069862	700	-9.427259	1553	461	-28.3474	2700	-32	-1.54298088753338	5.83212404763853e-12	-0.802389988824757	4.6625309935889e-14
760000	762000	AT4G01760	yes	Chr4	759130	761134	0.618727	0.684339	754000	756000	AT4G01740	NA	Chr4	753421	755456	0.669263	0.652225	7700	interaction377848	4-760000	+	1952	4-754000	+	2105	5752	77	0.069862	-263.032295	0	30	0.069862	3000	-76.027737	1021	1073	-28.3162	4700	-98	-5.72592157543928	5.36910080716058e-10	-2.35603394080916	2.32433541254514e-44
23714000	23716000	AT5G58700	NA	Chr5	23712999	23716098	0.640169	0.734922	23706000	23708000	AT5G58670	yes	Chr5	23704230	23706800	1.21499	1.09516	3400	interaction588899	5-23714000	+	2143	5-23706000	+	1046	8217	34	0.069862	-90.062898	0	7	0.069862	700	-9.425201	1040	491	-28.3009	2700	-32	-1.62971176750781	1.10946116924319e-32	-0.837150720345898	0.00151836570070743
2348000	2350000	AT3G07350	NA	Chr3	2347467	2348791	1.46595	1.00748	2338000	2340000	AT3G07330	NA	Chr3	2335611	2339100	0.776418	0.738759	2000	interaction263889	3-2348000	+	1131	3-2338000	+	1724	10030	20	0.069862	-43.439495	0	2	0.069862	200	-1.330894	628	958	-28.2859	1800	-16	2.21582609745202	9.83663853029963e-61	-0.460815612581451	0.0015884492017912
14872000	14874000	AT2G35340	NA	Chr2	14872319	14879739	0.710956	0.68062	14856000	14858000	AT2G35270	yes	Chr2	14857020	14857878	4.38539	0.777794	2045.803162	interaction227300	2-14872000	+	2508	2-14856000	+	2388	15989	22	0.075128	-49.515234	0	2	0.069862	200	-1.330894	1527	681	-28.2685	1845.8	-18	0.977785717367289	0.000221385974452143	-5.6471912348224	7.83901486186913e-34
21926000	21928000	AT5G54030	yes	Chr5	21925983	21927243	1.49888	1.85952	21912000	21914000	AT5G53970	NA	Chr5	21910532	21912777	0.815293	0.901969	2000	interaction579890	5-21926000	+	2363	5-21912000	+	1424	13703	20	0.069862	-43.407946	0	2	0.069862	200	-1.330893	1176	735	-28.2534	1800	-16	-5.40249749672936	8.84079868946656e-15	2.62237027995715	6.71501497707375e-53
10452000	10454000	AT2G24600	yes	Chr2	10452115	10454524	1.12093	0.988311	10444000	10446000	AT2G24580	yes	Chr2	10444789	10446242	1.03721	0.856561	2000	interaction203744	2-10452000	+	1543	2-10444000	+	1620	7952	20	0.069862	-43.39857	0	2	0.069862	200	-1.330893	1074	760	-28.2472	1800	-16	2.85683388790015	4.64675031791423e-07	-1.83861593629258	2.78451674473762e-09
21974000	21976000	AT5G54148	yes	Chr5	21975784	21977104	2.02541	1.34045	21972000	21974000	AT5G54145	yes	Chr5	21972464	21973083	2.85696	1.34469	4000	interaction580174	5-21974000	+	674	5-21972000	+	1073	2071	40	0.069862	-112.419324	0	10	0.069862	1000	-16.151416	261	413	-28.2463	3000	-42	5.61343635350212	1.58130183533497e-13	-1.49595336748045	0.00256379955589207
22492000	22494000	AT3G60870	yes	Chr3	22493203	22494001	3.80755	3.53692	22490000	22492000	AT3G60860	NA	Chr3	22484803	22491722	0.75527	0.710382	7500	interaction369410	3-22492000	+	1485	3-22490000	+	1661	2160	75	0.069862	-254.728383	0	29	0.069862	2900	-72.702371	800	1048	-28.2359	4600	-94	-4.71623517211558	2.69978591072995e-09	-0.668171283943147	5.19889867177802e-09
18074000	18076000	AT4G38690	NA	Chr4	18074474	18075765	0.735613	0.710737	18064000	18066000	AT4G38650	NA	Chr4	18063165	18065849	0.539928	0.536606	2000	interaction465955	4-18074000	+	1333	4-18064000	+	1622	10344	20	0.069862	-43.416252	0	2	0.069862	200	-1.330893	835	999	-28.2307	1800	-16	4.40483347963497	1.08248851413261e-20	0.977401377888835	0.000289794880271848
4776000	4778000	AT1G13960	NA	Chr1	4776462	4779400	0.703787	0.691654	4764000	4766000	AT1G13940	NA	Chr1	4762702	4766749	0.781313	0.713286	2000	interaction24969	1-4776000	+	1658	1-4764000	+	1564	11915	20	0.069862	-43.397065	0	2	0.069862	200	-1.330893	859	885	-28.226	1800	-16	-0.630400670550698	4.46936159604711e-09	0.470994955245309	8.04779319224279e-05
23710000	23712000	AT5G58690	NA	Chr5	23709528	23712131	0.553429	0.697828	23704000	23706000	AT5G58670	yes	Chr5	23704230	23706800	1.21499	1.09516	4858.035195	interaction588879	5-23710000	+	1992	5-23704000	+	2820	6374	49	0.070466	-146.116899	0	14	0.069862	1400	-26.198399	1039	1313	-28.2254	3458.04	-54	-2.21140052169657	1.26808682817027e-34	-0.837150720345898	0.00151836570070743
19084000	19086000	AT2G46495	yes	Chr2	19084133	19085704	2.25752	1.62287	19066000	19068000	AT2G46450	NA	Chr2	19065715	19069569	0.575565	0.495513	2000	interaction248981	2-19084000	+	3032	2-19066000	+	1515	17604	20	0.069862	-43.400643	0	2	0.069862	200	-1.330893	1436	916	-28.216	1800	-16	-5.16807970927133	3.79115905775145e-21	1.31813961945203	0.0028109068724863
8116000	8118000	AT4G14070	NA	Chr4	8111961	8118160	0.833044	0.719897	8108000	8110000	AT4G14060	yes	Chr4	8107336	8108307	3.54836	3.83831	5800	interaction414255	4-8116000	+	2207	4-8108000	+	1409	8027	58	0.069862	-182.588541	0	19	0.069862	1900	-40.506016	1485	713	-28.2141	3900	-68	2.81232225054045	6.1785923227803e-151	-5.83608956607533	1.76520047603056e-65
18524000	18526000	AT3G49960	yes	Chr3	18524083	18525687	2.02909	3.01804	18522000	18524000	AT3G49950	yes	Chr3	18522509	18523906	3.53849	5.06876	17100	interaction348596	3-18524000	+	1186	3-18522000	+	2595	1691	171	0.069862	-725.454922	0	97	0.069862	9700	-358.190231	663	1486	-28.1712	7400	-272	-5.19483106478151	1.1215712210177e-20	4.56923900756242	3.17613317516941e-14
11960000	11962000	AT3G30350	yes	Chr3	11960416	11961856	3.27271	3.22477	11956000	11958000	AT3G30340	yes	Chr3	11956600	11959098	1.93182	2.59414	6600	interaction314284	3-11960000	+	1007	3-11956000	+	1785	3924	66	0.069862	-216.630945	0	24	0.069862	2400	-56.324699	445	996	-28.1608	4200	-80	-4.77678890921341	2.50110220405866e-14	4.96824787754656	5.31911854763146e-19
22300000	22302000	AT3G60330	NA	Chr3	22298372	22303673	0.565875	0.586142	22288000	22290000	AT3G60310	NA	Chr3	22287681	22291308	0.720807	0.615363	5100	interaction368523	3-22300000	+	2528	3-22288000	+	2008	12102	51	0.069862	-154.005865	0	15	0.069862	1500	-28.898549	1582	1444	-28.1548	3600	-56	-3.33388160780627	1.32271978845482e-39	0.436479467292071	0.000396978872655775
10168000	10170000	AT3G27473	yes	Chr3	10169241	10171230	1.42332	1.06593	10164000	10166000	AT3G27470	NA	Chr3	10163048	10166907	0.739172	0.668076	12000	interaction305016	3-10168000	+	1476	3-10164000	+	2091	4345	120	0.069862	-463.697275	0	59	0.069862	5900	-187.424983	887	1139	-28.137	6100	-172	-2.79408080870389	1.03978719880144e-07	-0.888218256618775	3.68580273307134e-14
16648000	16650000	AT2G39880	yes	Chr2	16647944	16649479	0.765234	0.839068	16630000	16632000	AT2G39850	yes	Chr2	16630472	16634253	2.20294	2.52253	2900	interaction236507	2-16648000	+	954	2-16630000	+	2155	16911	29	0.069862	-72.624176	0	5	0.069862	500	-5.622123	535	1229	-28.1261	2400	-26	1.1915696773166	0.000128843435463368	6.78570065219287	1.41654836591021e-36
1064000	1066000	AT2G03505	yes	Chr2	1064235	1065372	1.11646	0.845019	1058000	1060000	AT2G03500	yes	Chr2	1059709	1062410	4.58516	4.72989	5600	interaction156186	2-1064000	+	1205	2-1058000	+	1208	5480	56	0.069862	-174.587935	0	18	0.069862	1800	-37.563209	746	622	-28.1122	3800	-64	-3.1744989553578	1.48396649589167e-15	-1.19395745001488	8.52244627243014e-09
3538000	3540000	AT5G11110	yes	Chr5	3536225	3541133	0.650306	0.665345	3532000	3534000	AT5G11100	NA	Chr5	3532401	3535221	0.76611	0.999251	7300	interaction486764	5-3538000	+	3037	5-3532000	+	1349	5583	73	0.069862	-246.186192	0	28	0.069862	2800	-69.387926	1774	669	-28.1112	4500	-92	-1.94961730946098	1.25488448542182e-32	-1.42075903301027	9.05481111206082e-13
10124000	10126000	AT1G29025	NA	Chr1	10124347	10127068	0.705936	0.938335	10122000	10124000	AT1G29020	yes	Chr1	10120496	10122902	0.892388	1.232	8400	interaction52949	1-10124000	+	2185	1-10122000	+	1185	2215	84	0.069862	-295.255868	0	35	0.069862	3500	-93.957777	1198	673	-28.1046	4900	-110	-5.44123955854727	2.33655676946666e-51	-4.000752555755	1.3063560194094e-40
5710000	5712000	AT5G17330	yes	Chr5	5711011	5715075	3.13667	1.01664	5700000	5702000	AT5G17310	NA	Chr5	5696644	5700922	0.817696	0.698533	2900	interaction498198	5-5710000	+	1716	5-5700000	+	1215	10365	29	0.069862	-72.537304	0	5	0.069862	500	-5.621595	560	653	-28.1038	2400	-26	-4.8503341148981	3.8480295583041e-61	1.49320141917761	9.96238502553767e-46
17886000	17888000	AT5G44400	yes	Chr5	17886193	17888480	1.47465	1.52967	17882000	17884000	AT5G44390	yes	Chr5	17882195	17885004	1.06056	1.04797	11600	interaction559237	5-17886000	+	2311	5-17882000	+	1863	3876	116	0.069862	-443.299467	0	56	0.069862	5600	-174.939885	1250	945	-28.092	6000	-166	1.64076113932628	4.0875244591253e-05	-0.991705587583429	0.00450537708592027
5592000	5594000	AT3G16460	yes	Chr3	5592581	5595717	1.34562	1.18725	5586000	5588000	AT3G16440	yes	Chr3	5585943	5587750	3.57843	4.23229	2600	interaction281279	3-5592000	+	2376	3-5586000	+	802	5450	26	0.069862	-62.602998	0	4	0.069862	400	-3.977271	857	244	-28.0888	2200	-22	-2.87890856891917	2.02134473310579e-10	-5.8500611369739	5.9747820537492e-31
30368000	30370000	AT1G80810	NA	Chr1	30365286	30368898	0.63244	0.618938	30362000	30364000	AT1G80790	NA	Chr1	30359722	30363307	0.735894	0.645795	2900	interaction151368	1-30368000	+	1211	1-30362000	+	1152	5212	29	0.069862	-72.554636	0	5	0.069862	500	-5.621094	616	586	-28.0827	2400	-26	0.472134584684665	0.0385460613198727	0.550307833013135	0.0251636773666922
1234000	1236000	AT3G04580	NA	Chr3	1235282	1238493	0.812896	0.726861	1230000	1232000	AT3G04570	yes	Chr3	1230985	1232328	5.08888	0.76369	6400	interaction258331	3-1234000	+	803	3-1230000	+	2838	4090	64	0.069862	-208.654308	0	23	0.069862	2300	-53.241411	350	777	-28.0647	4100	-78	-0.845093643908103	5.01691783417544e-25	-5.44179433445392	1.98755563568019e-40
18736000	18738000	AT2G45460	NA	Chr2	18736827	18741841	0.681778	0.651998	18734000	18736000	AT2G45450	yes	Chr2	18733274	18734127	1.69402	1.49134	1900	interaction247354	2-18736000	+	1707	2-18734000	+	167	2472	19	0.069862	-41.247295	0	2	0.069862	200	-1.330925	947	61	-28.0627	1700	-14	0.440571168885509	0.000466929547027478	1.37715108902858	0.00454657470496707
9152000	9154000	AT2G21390	NA	Chr2	9152005	9156878	0.674111	0.652874	9150000	9152000	AT2G21385	NA	Chr2	9149638	9151913	0.737304	0.75997	14700	interaction197155	2-9152000	+	2056	2-9150000	+	2006	1961	147	0.069862	-596.41363	0	78	0.069862	7800	-268.559219	1131	1213	-28.0509	6900	-222	-0.441964962366953	2.19988278504737e-05	3.27116321954003	7.83266157017963e-155
9650000	9652000	AT2G22690	NA	Chr2	9649689	9651439	0.768303	0.803399	9646000	9648000	AT2G22680	yes	Chr2	9645312	9647613	0.958687	0.780785	10700	interaction199888	2-9650000	+	1624	2-9646000	+	2075	3719	107	0.069862	-400.745461	0	50	0.069862	5000	-150.97862	791	1069	-28.0439	5700	-150	-0.461485337245974	0.0140033115968207	-2.39968897223116	4.89047353822512e-21
26576000	26578000	AT1G70510	yes	Chr1	26576485	26582431	2.84273	2.83268	26572000	26574000	AT1G70505	NA	Chr1	26570646	26572463	0.807434	0.714712	12942.960391	interaction132339	1-26576000	+	3054	1-26572000	+	2043	4260	145	0.078267	-586.192201	0	66	0.069862	6600	-216.42715	1442	1112	-28.0332	6342.96	-218	1.49625888620409	8.6784284394021e-05	1.55997916285732	1.20530844349767e-08
19388000	19390000	AT1G52110	yes	Chr1	19386788	19389740	2.65858	3.49375	19384000	19386000	AT1G52100	yes	Chr1	19383121	19385602	3.01581	3.3777	12000	interaction96063	1-19388000	+	2175	1-19384000	+	1667	3921	120	0.069862	-463.122302	0	59	0.069862	5900	-187.27485	1230	961	-27.9773	6100	-172	-4.99307743068161	5.83265146010197e-08	4.28721659099469	1.45845921687653e-17
11712000	11714000	AT4G22110	yes	Chr4	11711313	11714228	3.18679	2.68844	11690000	11692000	AT4G22070	yes	Chr4	11691377	11694392	4.23164	4.71163	3411.799709	interaction432859	4-11712000	+	1928	4-11690000	+	3048	22354	36	0.073716	-97.00319	0	7	0.069862	700	-9.410125	941	1765	-27.9653	2711.8	-36	-4.53091259632729	2.45102849241835e-10	-4.95156597227949	8.85151269780998e-26
17584000	17586000	AT4G37400	yes	Chr4	17584050	17586360	3.04957	2.60135	17580000	17582000	AT4G37390	yes	Chr4	17579656	17582022	3.62155	3.90768	11614.407063	interaction463486	4-17584000	+	2391	4-17580000	+	2908	4087	145	0.08722	-585.424461	0	57	0.069862	5700	-178.95791	995	1250	-27.9494	5914.41	-218	-3.57870877397591	2.01696576860312e-11	-3.39443798202025	3.35408085905794e-69
20380000	20382000	AT3G55000	NA	Chr3	20381507	20383789	0.834583	0.740768	20376000	20378000	AT3G54990	yes	Chr3	20373717	20376522	1.01445	1.06408	3800	interaction358193	3-20380000	+	1681	3-20376000	+	744	4269	38	0.069862	-104.854292	0	9	0.069862	900	-13.780647	931	345	-27.9345	2900	-38	0.299594424847295	0.000797185219215215	-0.942598819699101	0.00241578165834379
15700000	15702000	AT2G37420	NA	Chr2	15700330	15705346	0.625082	0.662111	15698000	15700000	AT2G37410	NA	Chr2	15697833	15699275	0.733783	0.692251	7600	interaction231512	2-15700000	+	2329	2-15698000	+	1244	2281	76	0.069862	-259.486948	0	30	0.069862	3000	-76.248473	1124	663	-27.9274	4600	-96	0.71357495902744	0.00681375193287975	-0.594608986081591	0.0452786477723731
22730000	22732000	AT1G61600	yes	Chr1	22729815	22731182	0.771303	0.767692	22726000	22728000	AT1G61590	yes	Chr1	22723500	22726074	3.51224	3.51935	6100	interaction112486	1-22730000	+	1632	1-22726000	+	1333	3440	61	0.069862	-195.072223	0	21	0.069862	2100	-46.669325	863	575	-27.926	4000	-72	-0.758176079989503	0.000221726077496109	-4.78683190043272	4.35691586352882e-46
2476000	2478000	AT4G04890	yes	Chr4	2476488	2482345	2.47839	3.36641	2474000	2476000	AT4G04885	NA	Chr4	2471971	2475981	0.737768	0.683063	19000	interaction387015	4-2476000	+	2089	4-2474000	+	1606	1775	190	0.069862	-823.002415	0	111	0.069862	11100	-422.031895	1437	1036	-27.9153	7900	-308	3.7155532930884	2.38230583741627e-36	0.353307718087395	0.00138849616853767
19972000	19974000	AT3G53940	NA	Chr3	19971018	19973769	0.797679	0.643838	19968000	19970000	AT3G53930	NA	Chr3	19966351	19970813	0.744007	0.69585	19700	interaction355948	3-19972000	+	1869	3-19968000	+	2625	3815	197	0.069862	-858.954317	0	116	0.069862	11600	-445.598644	1152	1575	-27.9087	8100	-322	-0.471826462148692	0.0350988853284376	-0.248372008668294	0.0162632634154442
22642000	22644000	AT1G61370	NA	Chr1	22642095	22645147	0.672252	0.639721	22638000	22640000	AT1G61360	NA	Chr1	22637727	22641825	0.658091	0.655568	6300	interaction111986	1-22642000	+	1765	1-22638000	+	1290	3800	63	0.069862	-203.48488	0	22	0.069862	2200	-49.710769	1013	749	-27.903	4100	-76	-1.9328851201343	4.39052268633757e-13	-1.80019809284181	4.21621427708871e-07
25468000	25470000	AT1G67900	NA	Chr1	25464725	25470017	0.783244	0.873348	25462000	25464000	AT1G67890	NA	Chr1	25457178	25462792	0.807997	0.730936	6300	interaction127071	1-25468000	+	1757	1-25462000	+	1066	6180	63	0.069862	-203.804813	0	22	0.069862	2200	-49.710387	981	750	-27.9015	4100	-76	2.33607846626119	1.4491726928303e-25	0.521039491108712	0.00208256711795187
22340000	22342000	AT3G60450	NA	Chr3	22340956	22342315	0.609853	0.776867	22338000	22340000	AT3G60440	NA	Chr3	22337792	22339446	0.711375	0.811855	17641.557382	interaction368759	3-22340000	+	2450	3-22338000	+	2925	2215	227	0.089894	-1019.80721	0	101	0.069862	10100	-373.368175	1265	1664	-27.8885	7541.56	-382	-1.85235899482539	5.96807402178087e-16	-0.454870331676049	0.00128600891350694
4466000	4468000	AT1G13110	NA	Chr1	4467219	4469033	0.644883	0.640913	4464000	4466000	AT1G13100	yes	Chr1	4463923	4465538	0.832114	0.855999	13700	interaction23485	1-4466000	+	1936	1-4464000	+	2199	2359	137	0.069862	-546.268879	0	71	0.069862	7100	-238.092241	1029	1234	-27.8634	6600	-204	1.40281443725996	1.07580069646258e-11	0.961957126425961	0.00474543977085493
16798000	16800000	AT1G44170	yes	Chr1	16796399	16800321	0.927845	0.833597	16794000	16796000	AT1G44160	yes	Chr1	16794828	16796450	0.884349	0.959001	8200	interaction82281	1-16798000	+	1071	1-16794000	+	1291	3482	82	0.069862	-286.569595	0	34	0.069862	3400	-90.498823	570	677	-27.8507	4800	-106	-1.70912697220874	1.26074058710587e-24	-3.66465903421667	2.25190887493411e-16
21924000	21926000	AT5G54030	yes	Chr5	21925983	21927243	1.49888	1.85952	21922000	21924000	AT5G54020	yes	Chr5	21921863	21923534	2.05313	2.0504	12200	interaction579885	5-21924000	+	1192	5-21922000	+	4422	2123	122	0.069862	-474.716823	0	61	0.069862	6100	-197.045787	554	2258	-27.8431	6100	-178	-5.40249749672936	8.84079868946656e-15	-4.88758826692207	4.8366299666038e-19
13798000	13800000	AT2G32510	NA	Chr2	13798820	13799939	0.666985	0.791146	13796000	13798000	AT2G32500	NA	Chr2	13794425	13797227	0.702578	0.629974	10200	interaction221115	2-13798000	+	1517	2-13796000	+	1299	1664	102	0.069862	-377.965182	0	47	0.069862	4700	-139.16474	883	765	-27.8362	5500	-140	-2.53208943555479	4.89431315340144e-07	3.60480687296202	1.40100039113094e-51
12710000	12712000	AT2G29750	yes	Chr2	12709726	12711696	1.48992	1.46543	12706000	12708000	AT2G29740	NA	Chr2	12706709	12708367	0.812358	0.792295	8554.731738	interaction215461	2-12710000	+	2955	2-12706000	+	2115	3533	96	0.078399	-348.513581	0	36	0.069862	3600	-97.269634	1394	1044	-27.8331	4954.73	-130	-5.7176264445045	2.48989559778311e-43	-2.3350565327212	3.71356649864215e-06
23798000	23800000	AT5G58940	NA	Chr5	23798561	23800823	0.630293	0.606702	23796000	23798000	AT5G58930	NA	Chr5	23794314	23796461	0.705547	0.754533	7400	interaction589388	5-23798000	+	1420	5-23796000	+	1064	1490	74	0.069862	-251.090403	0	29	0.069862	2900	-72.958397	738	525	-27.8241	4500	-94	-2.08577277414855	2.68492369666836e-10	0.476529534255147	1.65537801696963e-06
27684000	27686000	AT1G73630	yes	Chr1	27684735	27685453	1.52718	1.26047	27682000	27684000	AT1G73620	yes	Chr1	27681407	27683130	3.11004	2.52064	6400	interaction138034	1-27684000	+	1050	1-27682000	+	1163	2086	64	0.069862	-208.053051	0	23	0.069862	2300	-53.064318	471	501	-27.8012	4100	-78	-1.35662876415765	0.00255841354123378	-1.69814933906655	1.06154574362439e-05
21894000	21896000	AT3G59220	NA	Chr3	21894133	21895623	0.672312	0.781126	21890000	21892000	AT3G59210	NA	Chr3	21889570	21891915	0.798942	0.870581	9200	interaction366364	3-21894000	+	2336	3-21890000	+	2073	4476	92	0.069862	-330.180485	0	40	0.069862	4000	-112.05019	1242	997	-27.7865	5200	-122	-4.28480891623312	1.04771650078923e-121	-1.16602153025412	1.50989663269049e-12
7378000	7380000	AT2G16980	yes	Chr2	7376348	7381103	2.6897	1.3135	7370000	7372000	AT2G16970	yes	Chr2	7369548	7375528	2.94965	1.4677	3800	interaction187617	2-7378000	+	2061	2-7370000	+	909	8289	38	0.069862	-104.686272	0	9	0.069862	900	-13.768583	1140	403	-27.7582	2900	-38	-5.23475397992809	1.82168547859213e-40	-6.11386567987282	1.2698543828817e-31
14466000	14468000	AT4G29400	NA	Chr4	14466294	14468143	0.73525	0.734295	14462000	14464000	AT4G29380	NA	Chr4	14458821	14464859	0.714921	0.631267	6300	interaction447680	4-14466000	+	2493	4-14462000	+	1486	4087	63	0.069862	-203.285251	0	22	0.069862	2200	-49.674653	1342	857	-27.7576	4100	-76	3.09194083655109	2.40943047613804e-68	-0.477610001632819	1.62083670650358e-05
20156000	20158000	AT1G54000	yes	Chr1	20154168	20156419	3.55374	1.45037	20144000	20146000	AT1G53940	yes	Chr1	20143278	20145780	1.87147	1.80709	2600	interaction99552	1-20156000	+	1131	1-20144000	+	1545	11647	26	0.069862	-62.491848	0	4	0.069862	400	-3.972215	392	553	-27.736	2200	-22	-5.58651785762639	2.25931212151463e-43	-4.98256959541925	1.54283488595112e-38
7568000	7570000	AT2G17430	NA	Chr2	7568017	7570840	0.604762	0.82044	7566000	7568000	AT2G17420	NA	Chr2	7564344	7566539	0.826367	0.875551	5800	interaction188860	2-7568000	+	2489	2-7566000	+	497	1831	58	0.069862	-184.787568	0	20	0.069862	2000	-43.924816	1131	276	-27.7356	3800	-68	-2.62463907096101	6.29440873892471e-39	-2.31224194572099	2.40052622789871e-37
3532000	3534000	AT3G11280	NA	Chr3	3533254	3534847	0.916168	0.960735	3526000	3528000	AT3G11260	yes	Chr3	3527574	3528433	3.92513	4.26875	3600	interaction270523	3-3532000	+	1218	3-3526000	+	1708	5556	36	0.069862	-97.186297	0	8	0.069862	800	-11.524904	587	803	-27.7285	2800	-36	-0.661127343633489	1.19114554165128e-08	-1.38418025909963	1.53901428793252e-05
9414000	9416000	AT3G25790	yes	Chr3	9413126	9415003	3.92759	2.54902	9410000	9412000	AT3G25780	yes	Chr3	9409289	9410567	2.00213	1.07526	3800	interaction301542	3-9414000	+	1267	3-9410000	+	821	3796	38	0.069862	-104.767339	0	9	0.069862	900	-13.766012	452	418	-27.721	2900	-38	-4.10260274073625	6.36464057168575e-31	-3.16682521167873	6.09556392111134e-22
25588000	25590000	AT5G63940	NA	Chr5	25588074	25591458	0.701424	0.726974	25584000	25586000	AT5G63930	NA	Chr5	25583005	25586499	0.594515	0.669778	5400	interaction598336	5-25588000	+	2030	5-25584000	+	1479	3961	54	0.069862	-166.245675	0	17	0.069862	1700	-34.611771	1033	742	-27.6907	3700	-62	-1.02045240420131	1.19397131522682e-16	-1.84802942765459	1.69844530708538e-21
17210000	17212000	AT3G46720	NA	Chr3	17210854	17212348	0.684199	0.825778	17206000	17208000	AT3G46710	yes	Chr3	17206488	17209032	1.40189	1.95431	7200	interaction341568	3-17210000	+	856	3-17206000	+	3660	4459	72	0.069862	-242.95495	0	28	0.069862	2800	-69.689355	431	1880	-27.6893	4400	-90	-4.81110993567959	2.84339888620485e-46	-5.86719044366497	4.37759501465536e-21
8490000	8492000	AT3G23630	yes	Chr3	8488694	8490210	3.64933	3.46446	8480000	8482000	AT3G23620	NA	Chr3	8480024	8482157	0.82589	0.759388	2600	interaction296828	3-8490000	+	845	3-8480000	+	1458	9606	26	0.069862	-62.5835	0	4	0.069862	400	-3.971144	450	828	-27.6626	2200	-22	-5.04037564560612	1.41410376158497e-23	-0.376445036198917	0.011165604986079
24568000	24570000	AT5G61060	NA	Chr5	24566782	24571066	0.738485	0.719556	24560000	24562000	AT5G61030	NA	Chr5	24560450	24562306	0.591335	0.533266	8300	interaction593260	5-24568000	+	2221	5-24560000	+	2308	7536	83	0.069862	-289.395974	0	34	0.069862	3400	-89.93561	1420	1389	-27.6452	4900	-108	-0.382363120381931	0.00603977207589173	-0.605812572067401	0.0452733711837778
25426000	25428000	AT5G63520	NA	Chr5	25426176	25429112	0.799822	0.794752	25424000	25426000	AT5G63510	NA	Chr5	25423966	25425871	0.779592	0.683456	14400	interaction597481	5-25426000	+	894	5-25424000	+	2147	1790	144	0.069862	-588.078901	0	78	0.069862	7800	-272.301725	485	1203	-27.6431	6600	-220	1.42694123887144	5.80262308548531e-27	-0.430422088113634	5.8822533628682e-07
23768000	23770000	AT1G64060	yes	Chr1	23769773	23776931	1.5275	0.964963	23764000	23766000	AT1G64050	NA	Chr1	23762352	23766168	0.776504	0.793667	1500	interaction117847	1-23768000	+	220	1-23764000	+	2370	3791	15	0.069862	-29.261287	0	1	0.069862	100	-0.453546	57	1249	-27.6399	1400	-10	-2.72481543458543	2.94617730923313e-33	0.373554824959886	0.0288879499324161
17792000	17794000	AT3G48185	yes	Chr3	17793010	17793543	4.18465	5.23862	17788000	17790000	AT3G48170	NA	Chr3	17786139	17790008	0.752981	0.805059	5400	interaction344652	3-17792000	+	1585	3-17788000	+	1731	3838	54	0.069862	-166.181796	0	17	0.069862	1700	-34.602536	786	947	-27.6387	3700	-62	-0.623060893347571	0.00625470422738833	-0.450157738735778	9.02469906880074e-06
5240000	5242000	AT4G08290	yes	Chr4	5238905	5241034	1.37555	1.3128	5232000	5234000	AT4G08280	NA	Chr4	5230325	5232196	0.705656	0.740301	3800	interaction400467	4-5240000	+	1705	4-5232000	+	780	8506	38	0.069862	-104.811464	0	9	0.069862	900	-13.759308	917	463	-27.6243	2900	-38	-1.16487248066473	0.0137113223025001	1.06560791129831	4.56686309766439e-12
820000	822000	AT3G03450	NA	Chr3	819336	821406	0.600581	0.707598	816000	818000	AT3G03440	NA	Chr3	815643	818834	0.771063	0.793217	6600	interaction256188	3-820000	+	1627	3-816000	+	1357	3803	66	0.069862	-216.076404	0	24	0.069862	2400	-56.120877	973	681	-27.613	4200	-80	-2.09831538014057	4.47630247805929e-29	-0.939247977021214	0.00342685456258872
16088000	16090000	AT2G38410	NA	Chr2	16086629	16090208	0.703109	0.687517	16084000	16086000	AT2G38400	NA	Chr2	16083688	16086349	0.792758	0.831861	11200	interaction233521	2-16088000	+	1366	2-16084000	+	2101	3668	112	0.069862	-425.340627	0	54	0.069862	5400	-167.389517	679	1183	-27.5984	5800	-158	-0.783652167474487	3.51479017927187e-05	-1.07428262951776	1.04632886051427e-12
9202000	9204000	AT4G16265	NA	Chr4	9202351	9204078	0.797284	0.842307	9200000	9202000	AT4G16260	yes	Chr4	9200009	9201552	1.90386	1.34514	11800	interaction420423	4-9202000	+	1605	4-9200000	+	2115	2000	118	0.069862	-453.57463	0	58	0.069862	5800	-183.26382	895	1038	-27.5902	6000	-170	-0.487328283384278	0.0078647158161469	-5.0741743500473	7.98754003554362e-48
12002000	12004000	AT1G33102	yes	Chr1	12002332	12002877	2.3993	1.56785	11994000	11996000	AT1G33090	yes	Chr1	11993297	11996712	3.6146	3.48721	6100	interaction62616	1-12002000	+	1504	1-11994000	+	2552	7918	61	0.069862	-194.916612	0	21	0.069862	2100	-46.583164	771	1341	-27.5573	4000	-72	1.72058288428762	8.13112343054914e-06	-5.72634769003552	1.26787338830969e-16
16316000	16318000	AT5G40770	yes	Chr5	16314849	16316719	0.755206	0.712888	16310000	16312000	AT5G40760	NA	Chr5	16310747	16314774	0.768133	0.825489	4600	interaction551341	5-16316000	+	1075	5-16310000	+	1450	5495	46	0.069862	-134.866313	0	13	0.069862	1300	-23.628312	448	749	-27.5546	3300	-50	-0.45812112258782	6.84654258141934e-05	-1.80363450164482	8.45702613509151e-53
8686000	8688000	AT5G25160	yes	Chr5	8687456	8688415	3.61809	1.73044	8680000	8682000	AT5G25150	NA	Chr5	8677090	8682205	0.81558	0.711288	6600	interaction514124	5-8686000	+	1457	5-8680000	+	2239	5767	66	0.069862	-215.967686	0	24	0.069862	2400	-56.09872	723	1462	-27.5339	4200	-80	-4.78179493506217	1.47477638474199e-42	0.369876978550982	0.0383590908169567
8224000	8226000	AT2G18960	NA	Chr2	8221630	8227622	0.72423	0.696021	8208000	8210000	AT2G18950	NA	Chr2	8207341	8210463	0.800416	0.878174	5900	interaction192122	2-8224000	+	2587	2-8208000	+	1035	15816	59	0.069862	-187.146625	0	20	0.069862	2000	-43.571822	1613	609	-27.5292	3900	-70	-0.306744815487391	0.0460319214164212	1.28633399794971	0.000560722896522331
12340000	12342000	AT2G28780	yes	Chr2	12340033	12343421	4.01266	3.56232	12336000	12338000	AT2G28760	yes	Chr2	12336187	12339027	1.55982	1.22369	8400	interaction213282	2-12340000	+	2500	2-12336000	+	1881	3817	84	0.069862	-294.149557	0	35	0.069862	3500	-93.701688	1147	958	-27.527	4900	-110	-4.45253753835839	8.97821082218052e-20	-1.40260758933733	5.36055699479863e-12
13944000	13946000	AT2G32870	yes	Chr2	13944610	13946790	2.9117	3.6308	13936000	13938000	AT2G32850	yes	Chr2	13935185	13938845	0.833949	0.82751	6300	interaction221909	2-13944000	+	2130	2-13936000	+	2464	7976	63	0.069862	-202.890688	0	22	0.069862	2200	-49.615197	1125	1495	-27.5212	4100	-76	8.48839814309082	2.65906765134821e-123	-0.367552356295812	0.0164482436155118
3462000	3464000	AT1G10510	NA	Chr1	3461634	3465786	0.779349	0.728152	3448000	3450000	AT1G10480	yes	Chr1	3449690	3451226	4.30043	2.68336	2300	interaction18161	1-3462000	+	1813	1-3448000	+	1789	13496	23	0.069862	-52.694161	0	3	0.069862	300	-2.524289	926	495	-27.5176	2000	-18	1.51310791499626	1.1404599117976e-39	-4.70859978171962	4.53585291539041e-11
5570000	5572000	AT3G16410	yes	Chr3	5571991	5574541	2.33482	2.54081	5562000	5564000	AT3G16390	yes	Chr3	5562570	5564571	3.09517	3.24975	4800	interaction281115	3-5570000	+	1570	3-5562000	+	2540	8144	48	0.069862	-142.349501	0	14	0.069862	1400	-26.27487	520	1060	-27.5047	3400	-52	-4.06210710584225	3.8050475675441e-40	-3.57997220945164	2.43644009285561e-18
18460000	18462000	AT5G45540	yes	Chr5	18458153	18460821	0.742726	0.880661	18456000	18458000	AT5G45530	yes	Chr5	18454315	18457277	1.3711	1.55411	3800	interaction562233	5-18460000	+	1091	5-18456000	+	991	3481	38	0.069862	-104.623869	0	9	0.069862	900	-13.749763	656	547	-27.4879	2900	-38	2.27523978651604	5.26999271272829e-08	5.01884332127429	1.60326483562649e-14
7242000	7244000	AT4G12090	yes	Chr4	7242164	7242924	1.13261	0.855414	7240000	7242000	AT4G12080	NA	Chr4	7239218	7241494	0.764783	0.869886	9500	interaction409964	4-7242000	+	900	4-7240000	+	1493	1625	95	0.069862	-346.845114	0	43	0.069862	4300	-124.783619	394	630	-27.4664	5200	-130	-2.44829503185627	2.45738274386793e-07	-3.35727266726202	1.05408162368771e-32
28352000	28354000	AT1G75520	yes	Chr1	28351561	28353495	5.1419	5.04138	28338000	28340000	AT1G75500	yes	Chr1	28337725	28340275	1.77001	1.52154	2300	interaction141647	1-28352000	+	2699	1-28338000	+	989	13642	23	0.069862	-52.800172	0	3	0.069862	300	-2.523945	1347	581	-27.4642	2000	-18	-0.627201269470415	0.017906369856393	-0.442920118236847	0.0342540807853703
6888000	6890000	AT4G11320	yes	Chr4	6887253	6889059	3.08847	1.89685	6884000	6886000	AT4G11310	yes	Chr4	6883550	6885517	3.38146	3.14679	7400	interaction407986	4-6888000	+	1859	4-6884000	+	1251	3872	74	0.069862	-250.70415	0	29	0.069862	2900	-72.782387	817	687	-27.4547	4500	-94	-4.71419400996509	2.35464067254613e-17	-3.72018927404327	1.7826154608648e-07
18804000	18806000	AT3G50640	yes	Chr3	18803802	18804663	1.79747	1.8125	18784000	18786000	AT3G50620	yes	Chr3	18784694	18786914	0.880961	0.8504	2300	interaction350025	3-18804000	+	1203	3-18784000	+	1290	19349	23	0.069862	-52.757905	0	3	0.069862	300	-2.523796	628	743	-27.4413	2000	-18	-5.73966397922723	1.79675292049367e-35	-1.09468079549562	7.10162733217977e-09
16494000	16496000	AT5G41220	NA	Chr5	16494425	16497068	0.650247	0.648909	16484000	16486000	AT5G41180	NA	Chr5	16483870	16487426	0.630362	0.618931	2600	interaction552245	5-16494000	+	2441	5-16484000	+	1518	9909	26	0.069862	-62.423149	0	4	0.069862	400	-3.967853	1579	827	-27.4399	2200	-22	0.338295550898074	0.00832895133012878	-1.18443896949186	2.05903612712097e-12
21032000	21034000	AT5G51770	yes	Chr5	21031029	21032994	0.704095	0.804053	21020000	21022000	AT5G51750	NA	Chr5	21020206	21022781	0.617185	0.651573	5200	interaction575359	5-21032000	+	1405	5-21020000	+	2615	11537	52	0.069862	-158.261345	0	16	0.069862	1600	-31.746592	786	1763	-27.4375	3600	-58	-1.02528159000886	8.27567125635597e-10	3.00453875596061	7.55168743212687e-16
8756000	8758000	AT4G15340	yes	Chr4	8754479	8760589	3.6038	3.22206	8744000	8746000	AT4G15320	yes	Chr4	8742638	8747981	2.31515	2.71124	2300	interaction417635	4-8756000	+	1437	4-8744000	+	1282	12167	23	0.069862	-52.745891	0	3	0.069862	300	-2.523729	652	779	-27.4309	2000	-18	-5.13487434979854	1.16503970603958e-40	8.59653590037533	3.04248002568517e-09
27584000	27586000	AT1G73370	NA	Chr1	27584424	27588464	0.66304	0.700346	27572000	27574000	AT1G73340	NA	Chr1	27573115	27575419	0.587037	0.600993	2300	interaction137609	1-27584000	+	1774	1-27572000	+	1573	11837	23	0.069862	-52.712101	0	3	0.069862	300	-2.523585	1095	710	-27.4087	2000	-18	-0.808889500521918	0.00232819124155138	-5.00697609545104	1.19953109938089e-51
7532000	7534000	AT3G21390	NA	Chr3	7531401	7534544	0.904111	0.829293	7516000	7518000	AT3G21350	NA	Chr3	7517069	7518744	0.817434	0.892063	2300	interaction292160	3-7532000	+	1906	3-7516000	+	1561	16301	23	0.069862	-52.713245	0	3	0.069862	300	-2.523472	1128	763	-27.3915	2000	-18	1.1981882870677	1.14484385192272e-20	0.405059184564278	0.00108545367614196
9200000	9202000	AT4G16260	yes	Chr4	9200009	9201552	1.90386	1.34514	9182000	9184000	AT4G16220	yes	Chr4	9182282	9183922	1.72525	1.66802	2600	interaction420404	4-9200000	+	2115	4-9182000	+	2044	17705	26	0.069862	-62.371673	0	4	0.069862	400	-3.967056	1038	1137	-27.3866	2200	-22	-5.0741743500473	7.98754003554362e-48	-3.78150987820437	9.18726283900942e-08
3210000	3212000	AT5G10230	yes	Chr5	3209539	3211423	1.82196	2.14265	3202000	3204000	AT5G10200	NA	Chr5	3201517	3204709	0.697795	0.69996	7093.109588	interaction485075	5-3210000	+	1728	5-3202000	+	3317	7473	73	0.0719	-245.756409	0	27	0.069862	2700	-65.901666	865	1660	-27.368	4393.11	-92	-5.0415174674556	3.07810980689829e-33	-0.385989890380961	0.00015472925219758
19154000	19156000	AT2G46660	yes	Chr2	19153327	19155489	0.628628	0.790786	19144000	19146000	AT2G46630	yes	Chr2	19145528	19146713	3.4804	3.74369	2300	interaction249334	2-19154000	+	1751	2-19144000	+	1896	9821	23	0.069862	-52.696995	0	3	0.069862	300	-2.523307	906	857	-27.3661	2000	-18	-1.30934554973477	0.000722713365558308	-0.427544885861748	0.000441611010069704
4052000	4054000	AT5G12840	NA	Chr5	4050690	4053606	0.84395	0.693907	4048000	4050000	AT5G12480	NA	Chr5	4047514	4050533	0.683786	0.706211	12000	interaction489555	5-4052000	+	1218	5-4048000	+	2990	3469	120	0.069862	-464.770531	0	60	0.069862	6000	-192.27251	664	1645	-27.3555	6000	-174	0.798551464332449	0.0013596039434512	-0.561718827494238	1.31684550064888e-10
12006000	12008000	AT1G33110	yes	Chr1	12004926	12008833	1.03993	0.88681	12002000	12004000	AT1G33102	yes	Chr1	12002332	12002877	2.3993	1.56785	8500	interaction62640	1-12006000	+	2045	1-12002000	+	1504	3864	85	0.069862	-299.118778	0	36	0.069862	3600	-97.477462	1252	771	-27.3547	4900	-112	1.05052716056341	5.70673947032551e-06	1.72058288428762	8.13112343054914e-06
14888000	14890000	AT4G30460	yes	Chr4	14888979	14889802	3.6665	2.95805	14886000	14888000	AT4G30450	yes	Chr4	14886026	14886675	2.80533	2.4007	5400	interaction449848	4-14888000	+	1483	4-14886000	+	428	2744	54	0.069862	-168.671106	0	18	0.069862	1800	-37.98681	701	218	-27.3523	3600	-62	-3.6741581147679	6.63397077138355e-61	-3.83201587772188	1.39470996547564e-30
18160000	18162000	AT2G43850	NA	Chr2	18159181	18162044	0.777506	0.790574	18146000	18148000	AT2G43800	yes	Chr2	18145720	18148897	0.699871	0.741665	2617.822269	interaction244514	2-18160000	+	2292	2-18146000	+	2599	13762	28	0.074724	-69.008699	0	4	0.069862	400	-3.966531	1248	1421	-27.3516	2217.82	-24	-0.6765143731138	1.65655075607756e-06	0.772928946202234	0.00194616498062799
10840000	10842000	AT2G25470	yes	Chr2	10838419	10841881	1.2937	1.33154	10830000	10832000	AT2G25450	yes	Chr2	10829915	10831655	2.424	2.0234	7100	interaction205755	2-10840000	+	2150	2-10830000	+	1783	10121	71	0.069862	-237.061201	0	27	0.069862	2700	-65.894253	1117	882	-27.3455	4400	-88	8.81978984883683	8.25753469305165e-10	0.81827245587579	4.29731271043043e-08
5888000	5890000	AT5G17820	yes	Chr5	5887905	5890193	3.45415	3.3233	5878000	5880000	AT5G17800	yes	Chr5	5877188	5879331	3.99988	2.77106	4400	interaction499217	5-5888000	+	2544	5-5878000	+	1212	10087	44	0.069862	-127.049747	0	12	0.069862	1200	-21.01881	1129	503	-27.345	3200	-46	-5.59893378434986	9.64278187781484e-27	-4.2981076677256	2.21407910828232e-23
15398000	15400000	AT5G38460	yes	Chr5	15397739	15401095	0.821267	0.773024	15394000	15396000	AT5G38450	yes	Chr5	15393753	15397279	2.57902	1.98467	11500	interaction546898	5-15398000	+	1871	5-15394000	+	1835	3590	115	0.069862	-438.537707	0	56	0.069862	5600	-174.915971	1218	959	-27.3393	5900	-164	-0.401609106108582	0.000130685779683701	-5.87518513566568	5.04542549765773e-18
22278000	22280000	AT5G54840	NA	Chr5	22276512	22278423	0.976384	0.855208	22274000	22276000	AT5G54830	NA	Chr5	22273069	22276301	0.755524	0.722668	3500	interaction581618	5-22278000	+	544	5-22274000	+	1832	3389	35	0.069862	-94.163969	0	8	0.069862	800	-11.592095	209	982	-27.3304	2700	-34	-2.13789661142082	3.68464150500694e-14	-0.744323088175854	3.82854051934537e-05
20908000	20910000	AT5G51470	yes	Chr5	20907286	20909340	2.47796	3.41479	20904000	20906000	AT5G51460	yes	Chr5	20900976	20904539	0.845333	0.810146	7100	interaction574635	5-20908000	+	1802	5-20904000	+	1406	4178	71	0.069862	-237.436011	0	27	0.069862	2700	-65.883457	990	908	-27.3129	4400	-88	-1.519413678562	1.63447652227731e-05	1.05811149220448	3.60813573207475e-06
16858000	16860000	AT2G40370	yes	Chr2	16858165	16860606	2.88539	2.56209	16856000	16858000	AT2G40360	yes	Chr2	16852879	16856690	0.831758	0.751129	5600	interaction237581	2-16858000	+	2194	2-16856000	+	534	1670	56	0.069862	-176.222259	0	19	0.069862	1900	-40.979583	980	229	-27.3104	3700	-66	-5.17286675475193	3.02265253669499e-23	-0.726777164862193	0.0062813855098777
28716000	28718000	AT1G76520	NA	Chr1	28715077	28717416	0.701174	0.72478	28710000	28712000	AT1G76510	NA	Chr1	28708613	28712952	0.837935	0.757331	4600	interaction143289	1-28716000	+	2450	1-28710000	+	1104	5899	46	0.069862	-134.841384	0	13	0.069862	1300	-23.595546	1475	572	-27.2873	3300	-50	0.435767712645144	0.0176935382322764	0.259522519654211	0.0279398170476016
17120000	17122000	AT3G46500	yes	Chr3	17120479	17122745	1.43668	1.72965	17118000	17120000	AT3G46490	yes	Chr3	17115628	17119451	1.13782	1.20209	18400	interaction341126	3-17120000	+	1737	3-17118000	+	2533	1990	184	0.069862	-790.017665	0	107	0.069862	10700	-402.970102	1008	1520	-27.2516	7700	-296	-5.43275626327317	7.3727664651329e-54	2.86734679948729	8.21037109695304e-35
24174000	24176000	AT1G65070	NA	Chr1	24172898	24176310	0.773618	0.693882	24170000	24172000	AT1G65060	yes	Chr1	24167201	24171502	1.43039	1.49103	9700	interaction120031	1-24174000	+	1398	1-24170000	+	1968	3752	97	0.069862	-354.285382	0	44	0.069862	4400	-127.402395	831	1087	-27.2478	5300	-132	1.78692979859819	1.81265489822417e-23	2.36546829868466	4.90207870025058e-14
[truncated: 908 more rows]
