# Supplementary material for: Polycomb-dependent differential chromatin compartmentalization determines gene coregulation in Arabidopsis
Source: HighWire-hosted journal article supplement (doi:10.1101/gr.273771.120), 2021-06-03
Supplement: Supplemental_Table_S7.xlsx [file Supplemental_Table_S7.xlsx]

## Sheet: S7
Supplementary Table S7: HiChIP_Shoot_Fig2D
hyper shoot", "shoot specific loop" and "K27me3 marked"							hypo shoot, "shoot specific loop" and "K27me3 marked"
Gene	#'chr'	'start'	'end'	Shoot_RPGC	Root_RPGC		#'chr'	'start'	'end'	Gene	Shoot_RPGC	Root_RPGC
AT1G01200	Chr1	86514	88213	1.48396	0.883998		Chr1	1550542	1552517	AT1G05310	3.99219	5.40234
AT1G01670	Chr1	242842	245988	1.61456	1.11835		Chr1	1694285	1696058	AT1G05660	4.03856	4.65416
AT1G03820	Chr1	959868	960728	2.14414	1.99311		Chr1	2932738	2936586	AT1G09090	2.24641	2.60036
AT1G03840	Chr1	967502	970130	4.44696	3.98912		Chr1	3352158	3354856	AT1G10220	1.5138	2.02982
AT1G03850	Chr1	976096	977761	2.00989	1.78221		Chr1	4064666	4066341	AT1G12030	3.9886	4.96998
AT1G05280	Chr1	1535443	1537525	4.26269	4.01875		Chr1	4070123	4072567	AT1G12040	0.679292	0.705253
AT1G07175	Chr1	2202329	2202774	4.09615	3.55799		Chr1	4601260	4603298	AT1G13410	0.863311	0.895291
AT1G09890	Chr1	3214236	3217538	1.31196	1.1841		Chr1	4604840	4606053	AT1G13420	2.64875	3.078
AT1G10400	Chr1	3414851	3416358	1.96174	1.4529		Chr1	4858641	4859601	AT1G14220	2.39879	3.47103
AT1G10480	Chr1	3449690	3451226	4.30043	2.68336		Chr1	4864901	4868000	AT1G14240	2.53929	2.87178
AT1G10750	Chr1	3574806	3578474	0.89318	0.813529		Chr1	4868451	4871488	AT1G14250	1.32091	2.09904
AT1G11080	Chr1	3694671	3698013	2.96174	2.24063		Chr1	4934119	4936100	AT1G14430	0.550087	0.999012
AT1G11580	Chr1	3888689	3890811	2.77505	1.21031		Chr1	5132534	5133716	AT1G14880	3.05456	3.39932
AT1G12010	Chr1	4056206	4057933	2.29137	1.95998		Chr1	6110106	6116617	AT1G17760	0.732447	0.799218
AT1G12160	Chr1	4126065	4128310	2.8369	0.838062		Chr1	6336527	6342460	AT1G18410	0.914155	0.971162
AT1G12200	Chr1	4137532	4140028	3.21766	2.10989		Chr1	6680562	6683533	AT1G19330	0.805718	1.01962
AT1G12600	Chr1	4286203	4288878	1.9941	1.84483		Chr1	7399061	7400605	AT1G21130	0.917371	1.21184
AT1G14030	Chr1	4805305	4807517	0.711527	0.608517		Chr1	8184951	8189064	AT1G23090	1.04639	1.4486
AT1G14040	Chr1	4810487	4814543	1.26223	0.843957		Chr1	8195775	8196475	AT1G23100	0.836446	0.863116
AT1G16520	Chr1	5648759	5651167	0.791602	0.740778		Chr1	8200382	8201235	AT1G23130	3.47905	4.86417
AT1G16530	Chr1	5651369	5652883	2.71765	1.61456		Chr1	8209231	8211325	AT1G23160	2.80916	4.07924
AT1G17060	Chr1	5832096	5835456	1.48457	1.18142		Chr1	8651406	8653828	AT1G24400	1.51927	2.47478
AT1G17190	Chr1	5875349	5876545	2.60614	1.80094		Chr1	8655245	8655650	AT1G24405	1.48348	1.73522
AT1G18100	Chr1	6227216	6230188	2.34294	1.18028		Chr1	8674055	8676408	AT1G24470	2.59603	3.42909
AT1G18140	Chr1	6238843	6241436	2.19885	1.86525		Chr1	8938478	8940387	AT1G25450	2.07413	2.51303
AT1G18150	Chr1	6244297	6247812	0.874153	0.793119		Chr1	9126736	9128528	AT1G26380	1.93471	2.45284
AT1G19220	Chr1	6628067	6633087	0.713826	0.669912		Chr1	9228234	9232240	AT1G26700	1.9261	2.27686
AT1G19230	Chr1	6644188	6649375	1.3245	0.995207		Chr1	12180775	12182363	AT1G33600	1.0279	2.02778
AT1G19800	Chr1	6846368	6848103	0.828065	0.807022		Chr1	12981250	12984583	AT1G35350	0.950129	0.97825
AT1G20900	Chr1	7272555	7274072	4.4353	1.19888		Chr1	17934828	17936915	AT1G48510	1.32532	1.76048
AT1G20910	Chr1	7276942	7281138	0.918606	0.711699		Chr1	18347035	18348951	AT1G49570	3.52228	4.31183
AT1G21140	Chr1	7404382	7405281	4.10112	3.64629		Chr1	19007509	19011272	AT1G51270	2.96555	3.56284
AT1G22220	Chr1	7846601	7847802	2.14119	1.02137		Chr1	19090846	19094306	AT1G51480	2.76558	3.75955
AT1G22440	Chr1	7922427	7924944	2.26138	0.974418		Chr1	19097796	19101080	AT1G51500	1.22652	1.30997
AT1G23760	Chr1	8402045	8404301	1.82736	1.44077		Chr1	19252846	19256783	AT1G51850	1.8269	2.22887
AT1G26970	Chr1	9359681	9361833	1.4538	1.26541		Chr1	19257633	19261479	AT1G51860	1.06514	1.24629
AT1G27200	Chr1	9449548	9451750	0.79486	0.766359		Chr1	19270192	19274068	AT1G51880	2.15673	2.95586
AT1G27660	Chr1	9621569	9626004	3.81201	2.98552		Chr1	19274657	19278528	AT1G51890	1.13278	1.54085
AT1G28080	Chr1	9789825	9791546	4.68887	3.91843		Chr1	19354918	19356764	AT1G52050	3.08597	3.54472
AT1G28090	Chr1	9795761	9799063	0.992724	0.786344		Chr1	19359038	19360675	AT1G52060	2.82316	3.36325
AT1G28960	Chr1	10109499	10111660	0.857594	0.85135		Chr1	20019292	20019799	AT1G53635	2.23318	2.70406
AT1G29195	Chr1	10202535	10203396	3.41915	1.28457		Chr1	20279566	20280952	AT1G54330	4.23691	5.37955
AT1G29280	Chr1	10236366	10237467	3.80834	2.6211		Chr1	20336339	20339535	AT1G54450	1.2216	1.44307
AT1G29290	Chr1	10244965	10245572	1.97106	1.83513		Chr1	20769319	20771871	AT1G55590	0.993681	1.00442
AT1G30700	Chr1	10892569	10894572	2.78568	2.01969		Chr1	21320937	21324637	AT1G57570	2.6393	3.45178
AT1G31070	Chr1	11084858	11088563	1.02995	0.955763		Chr1	21327359	21329763	AT1G57590	0.813036	0.912286
AT1G31772	Chr1	11378939	11379414	2.0181	0.822074		Chr1	21472964	21474602	AT1G58037	1.68892	2.58562
AT1G32510	Chr1	11756999	11758118	1.58884	1.03639		Chr1	22174178	22176321	AT1G60130	1.63314	2.00596
AT1G33090	Chr1	11993297	11996712	3.6146	3.48721		Chr1	22807439	22808114	AT1G61760	2.14272	3.79116
AT1G33102	Chr1	12002332	12002877	2.3993	1.56785		Chr1	23009910	23013529	AT1G62290	1.65089	2.11689
AT1G33750	Chr1	12233768	12236476	4.06441	3.94207		Chr1	23056652	23058114	AT1G62350	1.13172	1.61971
AT1G34030	Chr1	12370064	12371553	0.774369	0.767544		Chr1	23058581	23061722	AT1G62360	4.29625	5.97135
AT1G35320	Chr1	12959056	12962853	1.86187	0.957037		Chr1	23072574	23073189	AT1G62370	0.504688	0.963288
AT1G45145	Chr1	17074941	17076330	2.47982	1.46922		Chr1	23257725	23261966	AT1G62810	1.23603	1.44315
AT1G49310	Chr1	18237862	18238367	4.32886	2.70417		Chr1	24028917	24030780	AT1G64660	1.25027	1.76165
AT1G49320	Chr1	18246304	18247992	3.217	2.17724		Chr1	24030819	24033556	AT1G64670	1.14111	1.65254
AT1G49470	Chr1	18310493	18311634	3.09095	2.46954		Chr1	24113214	24114984	AT1G64900	2.34002	4.12174
AT1G49475	Chr1	18312919	18314016	1.41619	0.916334		Chr1	24215643	24217328	AT1G65190	1.54285	2.79204
AT1G51190	Chr1	18977283	18980618	4.08667	2.97851		Chr1	24494677	24498542	AT1G65850	2.76792	3.11791
AT1G51840	Chr1	19249448	19250709	2.94154	2.86121		Chr1	24869553	24870850	AT1G66690	1.87803	2.00087
AT1G52410	Chr1	19520727	19525624	0.855769	0.840897		Chr1	24984940	24989797	AT1G66960	2.11796	2.81176
AT1G53625	Chr1	20014409	20014923	1.1717	0.696855		Chr1	25446288	25446737	AT1G67865	4.59849	4.99231
AT1G53633	Chr1	20017388	20017932	2.21363	1.67168		Chr1	25449366	25451012	AT1G67870	2.04769	2.92002
AT1G53640	Chr1	20020884	20025461	2.98821	2.26763		Chr1	25759841	25762934	AT1G68600	1.15969	1.74583
AT1G53660	Chr1	20034031	20035946	2.12187	1.98365		Chr1	25765946	25767240	AT1G68620	1.80942	2.21231
AT1G53940	Chr1	20143278	20145780	1.87147	1.80709		Chr1	26061861	26062514	AT1G69320	4.13498	4.90981
AT1G53950	Chr1	20146447	20147988	1.66979	1.22316		Chr1	26966886	26970572	AT1G71696	0.846788	1.05852
AT1G53990	Chr1	20151015	20152752	4.02815	2.7653		Chr1	27211844	27214665	AT1G72280	0.691656	0.809642
AT1G54000	Chr1	20154168	20156419	3.55374	1.45037		Chr1	28108473	28111534	AT1G74810	0.648258	0.784776
AT1G55020	Chr1	20525707	20530273	1.02327	0.829231		Chr1	28244316	28245501	AT1G75250	2.66309	2.68859
AT1G55380	Chr1	20676621	20678607	1.34896	1.07311		Chr1	28484162	28485951	AT1G75860	0.876766	0.908834
AT1G55390	Chr1	20680875	20683043	2.49412	2.42857		Chr1	29235802	29239445	AT1G77760	1.16119	1.32918
AT1G58400	Chr1	21696164	21699118	1.68067	0.699324		Chr1	29634123	29635813	AT1G78820	1.35393	2.61151
AT1G58410	Chr1	21701184	21704255	2.46631	0.919256		Chr2	505486	509425	AT2G02070	2.79963	4.29687
AT1G58420	Chr1	21707378	21708118	1.67123	1.32028		Chr2	749918	751900	AT2G02690	1.48984	2.08314
AT1G59660	Chr1	21924692	21929424	0.683558	0.618232		Chr2	7584504	7588008	AT2G17470	2.36814	2.97065
AT1G60030	Chr1	22113840	22116845	0.726029	0.69971		Chr2	9245160	9247025	AT2G21610	3.11607	3.57863
AT1G60470	Chr1	22278974	22280586	1.10507	1.09133		Chr2	9579873	9583893	AT2G22540	0.972085	1.97924
AT1G61810	Chr1	22830014	22834728	2.15741	1.28073		Chr2	9786315	9790179	AT2G22990	1.00135	1.80243
AT1G62440	Chr1	23111817	23115293	2.45246	1.88794		Chr2	9798842	9802674	AT2G23010	1.72455	2.26027
AT1G62560	Chr1	23159822	23162649	1.92657	1.50322		Chr2	9963977	9965229	AT2G23400	1.30378	2.19639
AT1G62570	Chr1	23169135	23172105	2.30058	1.21148		Chr2	10107708	10113213	AT2G23760	1.80794	3.75736
AT1G62990	Chr1	23337364	23340688	3.65407	1.58844		Chr2	10582829	10585216	AT2G24850	2.45691	3.01818
AT1G63000	Chr1	23342392	23344113	0.794896	0.748465		Chr2	10838419	10841881	AT2G25470	1.2937	1.33154
AT1G64060	Chr1	23769773	23776931	1.5275	0.964963		Chr2	11234650	11236936	AT2G26410	1.44566	1.7633
AT1G64920	Chr1	24117439	24118798	2.32399	2.21812		Chr2	11239433	11242239	AT2G26420	0.947223	1.14586
AT1G64940	Chr1	24123788	24125324	1.95178	1.74205		Chr2	11706197	11708065	AT2G27360	1.0183	1.15947
AT1G65180	Chr1	24211740	24213870	2.01947	2.00283		Chr2	11708449	11710004	AT2G27370	2.54861	3.18781
AT1G65985	Chr1	24562552	24568530	3.26311	2.47185		Chr2	11885570	11889176	AT2G27920	0.825174	0.976749
AT1G66270	Chr1	24699989	24703041	4.01593	3.32437		Chr2	12053541	12054398	AT2G28270	1.29038	1.74163
AT1G66280	Chr1	24706511	24709785	3.14498	1.51267		Chr2	12275318	12277245	AT2G28630	3.82605	5.36597
AT1G66480	Chr1	24805634	24807557	3.34019	1.04151		Chr2	12437913	12442347	AT2G28960	3.14401	3.61957
AT1G67030	Chr1	25016542	25017512	3.2527	1.11995		Chr2	12443918	12448163	AT2G28970	2.60862	3.17103
AT1G67148	Chr1	25121234	25121898	2.48997	1.10977		Chr2	12940454	12942409	AT2G30370	2.85877	4.10302
AT1G67150	Chr1	25122458	25124695	2.97091	2.62358		Chr2	13252218	13252765	AT2G31083	4.37279	5.72232
AT1G67810	Chr1	25426487	25427349	3.10571	1.62023		Chr2	13840743	13844324	AT2G32620	2.21868	2.60634
AT1G68390	Chr1	25642733	25645607	2.0976	1.59724		Chr2	13863716	13864596	AT2G32690	1.17237	1.73539
AT1G69310	Chr1	26054307	26058105	4.01642	2.58016		Chr2	13944610	13946790	AT2G32870	2.9117	3.6308
AT1G69810	Chr1	26277237	26279118	3.79541	3.62703		Chr2	13948749	13950556	AT2G32880	2.72046	3.67839
AT1G70170	Chr1	26423873	26425356	3.86761	3.68961		Chr2	14430760	14432269	AT2G34180	0.949027	1.52163
AT1G70860	Chr1	26718319	26718992	3.57272	3.39146		Chr2	14543996	14546879	AT2G34510	0.82401	1.69141
AT1G71940	Chr1	27078523	27080248	0.793834	0.769276		Chr2	14575391	14576517	AT2G34610	1.75916	2.17099
AT1G72220	Chr1	27184280	27185830	1.32558	0.826217		Chr2	15597920	15600077	AT2G37130	0.848254	1.35956
AT1G72230	Chr1	27188065	27189244	2.65862	1.98043		Chr2	16079680	16081509	AT2G38390	4.16453	4.80122
AT1G73620	Chr1	27681407	27683130	3.11004	2.52064		Chr2	16630472	16634253	AT2G39850	2.20294	2.52253
AT1G73850	Chr1	27767262	27770457	2.61391	1.9599		Chr2	16637676	16639308	AT2G39855	2.17481	2.33859
AT1G73990	Chr1	27824432	27828926	0.857345	0.70608		Chr2	16754938	16757592	AT2G40120	0.582769	0.64199
AT1G74660	Chr1	28047575	28048127	5.09748	1.42021		Chr2	17198281	17199320	AT2G41240	1.4182	2.07831
AT1G75450	Chr1	28314457	28318375	2.16845	1.58634		Chr2	17200658	17202618	AT2G41250	0.859755	0.861066
AT1G75500	Chr1	28337725	28340275	1.77001	1.52154		Chr2	17880614	17882636	AT2G43000	2.54299	3.34242
AT1G75520	Chr1	28351561	28353495	5.1419	5.04138		Chr2	18628264	18630712	AT2G45190	4.67015	6.50542
AT1G75550	Chr1	28369436	28369940	1.56053	0.824571		Chr2	18839585	18841403	AT2G45740	0.961506	1.67541
AT1G76440	Chr1	28682128	28683750	0.81663	0.794728		Chr2	18912259	18914739	AT2G45970	2.17749	2.85525
AT1G76500	Chr1	28705526	28706562	4.08851	0.831379		Chr2	19197382	19200221	AT2G46720	1.37791	1.62457
AT1G77520	Chr1	29130402	29132180	1.76783	1.33697		Chr2	19685065	19685993	AT2G48130	1.72846	2.0558
AT1G77600	Chr1	29152747	29162448	0.76618	0.665761		Chr3	16642	18840	AT3G01060	0.603054	1.51159
AT1G78090	Chr1	29373888	29376504	1.34628	1.26941		Chr3	370761	373722	AT3G02110	0.875015	1.00718
AT1G78815	Chr1	29631742	29632745	4.93719	3.7241		Chr3	2206386	2208058	AT3G06990	1.8264	2.15595
AT1G80730	Chr1	30339322	30340247	2.23541	2.07166		Chr3	2534886	2538372	AT3G07960	0.626997	0.663109
AT1G80820	Chr1	30370571	30372670	1.79594	1.729		Chr3	2891039	2893629	AT3G09400	2.00525	2.41907
AT2G01430	Chr2	187797	190369	3.06119	2.30766		Chr3	3527574	3528433	AT3G11260	3.92513	4.26875
AT2G01520	Chr2	235924	237147	3.80859	3.58189		Chr3	3569827	3571960	AT3G11390	1.96134	3.00245
AT2G01660	Chr2	290602	292590	1.88566	1.42803		Chr3	3573360	3578125	AT3G11402	1.40696	1.91038
AT2G01890	Chr2	396767	399208	1.85148	1.14661		Chr3	4043309	4044609	AT3G12720	3.2187	4.09166
AT2G01900	Chr2	405917	409014	3.22776	2.15591		Chr3	4047071	4048614	AT3G12730	3.92079	4.82184
AT2G02680	Chr2	745774	748573	2.3174	2.24656		Chr3	4141050	4142548	AT3G12970	1.04826	1.61893
AT2G03360	Chr2	1022286	1024391	2.59854	1.7833		Chr3	5321135	5322376	AT3G15700	1.14794	2.00139
AT2G03505	Chr2	1064235	1065372	1.11646	0.845019		Chr3	5497596	5499235	AT3G16220	0.89538	1.68548
AT2G04800	Chr2	1687195	1687817	3.19594	0.89513		Chr3	5676828	5677921	AT3G16660	2.99988	3.90268
AT2G16710	Chr2	7248137	7250291	0.923033	0.893515		Chr3	6917293	6921556	AT3G19895	0.977429	0.996794
AT2G16970	Chr2	7369548	7375528	2.94965	1.4677		Chr3	7391437	7395041	AT3G21090	1.3981	1.6804
AT2G16980	Chr2	7376348	7381103	2.6897	1.3135		Chr3	7511786	7515937	AT3G21340	1.90081	2.61663
AT2G16990	Chr2	7383034	7387854	2.26747	1.19478		Chr3	7591482	7592322	AT3G21550	2.2317	2.57608
AT2G18360	Chr2	7976711	7979377	2.46242	2.00473		Chr3	7638662	7642205	AT3G21690	1.29239	1.6142
AT2G18370	Chr2	7980624	7981758	3.44054	3.40072		Chr3	7676926	7678414	AT3G21790	1.63277	3.32801
AT2G18570	Chr2	8063319	8065008	2.41946	2.01781		Chr3	7680105	7681685	AT3G21800	4.31308	4.92246
AT2G18980	Chr2	8233334	8235316	1.41209	1.33338		Chr3	8788852	8793371	AT3G24255	0.297078	0.332283
AT2G18990	Chr2	8238690	8240002	0.84181	0.770683		Chr3	16361369	16364610	AT3G44820	0.862371	0.912767
AT2G19060	Chr2	8256999	8260545	3.73344	3.59642		Chr3	16379632	16381070	AT3G44860	1.37228	2.69298
AT2G19110	Chr2	8278880	8286445	1.07566	0.768982		Chr3	16782642	16784735	AT3G45710	0.8428	1.39417
AT2G19170	Chr2	8314004	8318596	0.653089	0.643348		Chr3	17115628	17119451	AT3G46490	1.13782	1.20209
AT2G20060	Chr2	8659042	8661489	0.872848	0.728804		Chr3	17120479	17122745	AT3G46500	1.43668	1.72965
AT2G20080	Chr2	8662929	8665026	3.73423	2.90399		Chr3	17234493	17236542	AT3G46800	2.6107	3.60236
AT2G21045	Chr2	9027851	9029020	2.33963	2.07099		Chr3	17238235	17240623	AT3G46810	1.99096	3.1234
AT2G21840	Chr2	9307059	9310058	1.52404	1.44172		Chr3	17324161	17327152	AT3G47040	1.20212	1.44806
AT2G21850	Chr2	9315217	9318238	1.18504	0.847278		Chr3	17328032	17330889	AT3G47050	1.26533	1.56955
AT2G22680	Chr2	9645312	9647613	0.958687	0.780785		Chr3	17600650	17604965	AT3G47740	1.50279	2.07066
AT2G23530	Chr2	10020651	10022864	0.816423	0.689696		Chr3	17618054	17622678	AT3G47770	2.14665	2.9787
AT2G23540	Chr2	10024345	10026233	2.7617	2.65867		Chr3	17891133	17892847	AT3G48320	0.759376	0.980527
AT2G24260	Chr2	10319333	10322222	4.48228	1.92781		Chr3	18522509	18523906	AT3G49950	3.53849	5.06876
AT2G25450	Chr2	10829915	10831655	2.424	2.0234		Chr3	18524083	18525687	AT3G49960	2.02909	3.01804
AT2G26370	Chr2	11224564	11226214	1.24812	1.21001		Chr3	18595730	18597642	AT3G50150	2.70664	3.25014
AT2G27535	Chr2	11765322	11766144	2.34574	2.08585		Chr3	18640171	18640993	AT3G50290	1.69979	2.08384
AT2G27930	Chr2	11892368	11893488	2.86185	1.93529		Chr3	19069362	19072195	AT3G51370	0.8234	0.850368
AT2G27950	Chr2	11899204	11904007	0.91365	0.755994		Chr3	22680959	22683769	AT3G61280	1.67981	2.18949
AT2G28510	Chr2	12199097	12200765	3.3671	1.76021		Chr3	22839314	22842432	AT3G61710	0.907555	1.1261
AT2G28710	Chr2	12322385	12323584	3.7398	3.50287		Chr3	23266248	23266934	AT3G62950	3.79934	4.93594
AT2G28760	Chr2	12336187	12339027	1.55982	1.22369		Chr4	564759	566310	AT4G01360	1.89266	2.23807
AT2G28780	Chr2	12340033	12343421	4.01266	3.56232		Chr4	626117	628055	AT4G01480	0.772016	0.81601
AT2G28800	Chr2	12356363	12359252	0.971302	0.925118		Chr4	833172	834340	AT4G01925	1.30554	1.6712
AT2G28830	Chr2	12366747	12370684	1.32424	1.25226		Chr4	853921	857008	AT4G01970	0.627638	0.738742
AT2G29130	Chr2	12524888	12527747	2.15986	1.68836		Chr4	1188982	1193611	AT4G02700	2.60489	2.9232
AT2G31160	Chr2	13277810	13278745	4.10318	2.2193		Chr4	1329951	1331139	AT4G03010	0.503749	0.787446
AT2G31170	Chr2	13282354	13285666	0.921736	0.726028		Chr4	2476488	2482345	AT4G04890	2.47839	3.36641
AT2G31180	Chr2	13286720	13288176	1.65747	1.01115		Chr4	2667989	2669364	AT4G05170	1.04907	1.73462
AT2G32270	Chr2	13704220	13706860	3.18057	2.95026		Chr4	2671821	2673243	AT4G05180	0.869048	3.11398
AT2G32280	Chr2	13713035	13714211	1.43703	0.974967		Chr4	8107336	8108307	AT4G14060	3.54836	3.83831
AT2G32487	Chr2	13791886	13793177	2.0652	1.67945		Chr4	8742638	8747981	AT4G15320	2.31515	2.71124
AT2G32960	Chr2	13987766	13990976	1.93981	1.82407		Chr4	8807526	8810512	AT4G15396	2.81305	3.34479
AT2G33793	Chr2	14296993	14300506	0.765904	0.652532		Chr4	8913837	8915663	AT4G15620	2.19627	2.56295
AT2G34140	Chr2	14413757	14414765	2.55181	0.969901		Chr4	8929178	8929765	AT4G15670	3.32231	4.89968
AT2G34720	Chr2	14649766	14651627	0.832246	0.814867		Chr4	8931651	8932295	AT4G15680	3.36869	4.32888
AT2G35000	Chr2	14751573	14753319	2.23158	0.905193		Chr4	10763933	10765753	AT4G19810	2.46204	3.17256
AT2G35270	Chr2	14857020	14857878	4.38539	0.777794		Chr4	10767435	10768614	AT4G19820	2.51008	3.60657
AT2G35690	Chr2	14999753	15003066	0.827041	0.780975		Chr4	11517352	11519765	AT4G21680	0.633086	0.669946
AT2G36890	Chr2	15485778	15487277	3.00683	1.6196		Chr4	12299822	12302719	AT4G23570	1.06567	1.93044
AT2G37440	Chr2	15718052	15722108	2.29153	1.70575		Chr4	12307125	12309647	AT4G23590	3.53208	4.32828
AT2G37460	Chr2	15726447	15729098	1.5045	1.04179		Chr4	13300794	13304347	AT4G26270	0.979705	1.13274
AT2G37540	Chr2	15751567	15753967	2.48057	2.46873		Chr4	14566264	14569332	AT4G29740	2.15065	2.49195
AT2G38080	Chr2	15934459	15937616	2.63224	1.87061		Chr4	14632652	14635885	AT4G29920	0.657139	0.761217
AT2G38300	Chr2	16043959	16045992	4.33643	4.03594		Chr4	16095391	16096610	AT4G33450	3.38073	5.0066
AT2G38320	Chr2	16055288	16057980	2.0379	1.78157		Chr4	17464784	17467109	AT4G37070	1.89983	2.27564
AT2G39370	Chr2	16444129	16445266	0.936379	0.819235		Chr4	17954709	17957828	AT4G38340	1.41272	2.33172
AT2G39410	Chr2	16455568	16458217	3.73128	2.96518		Chr5	26847	27449	AT5G01075	1.32813	2.06889
AT2G39550	Chr2	16501622	16504304	0.928596	0.845136		Chr5	1221565	1228678	AT5G04360	0.826984	1.16684
AT2G40360	Chr2	16852879	16856690	0.831758	0.751129		Chr5	1349642	1352525	AT5G04690	3.48409	4.76495
AT2G40370	Chr2	16858165	16860606	2.88539	2.56209		Chr5	2039858	2041928	AT5G06640	1.06086	1.74093
AT2G40390	Chr2	16867292	16869089	2.81047	2.47446		Chr5	2097668	2098740	AT5G06790	1.48129	2.00334
AT2G40470	Chr2	16902303	16903652	3.76877	3.71216		Chr5	2450324	2451578	AT5G07700	2.08083	2.67117
AT2G41130	Chr2	17143293	17144949	4.7107	4.35906		Chr5	2479513	2482850	AT5G07780	1.34552	1.62079
AT2G41660	Chr2	17367821	17369189	2.72963	1.23752		Chr5	2584884	2585613	AT5G08070	4.18134	5.51142
AT2G41690	Chr2	17381722	17382577	2.10666	1.83058		Chr5	3228240	3232723	AT5G10278	3.45436	5.47191
AT2G42570	Chr2	17717366	17720080	1.0922	0.921394		Chr5	4024313	4026741	AT5G12420	1.67866	2.07517
AT2G43070	Chr2	17910887	17914870	0.95149	0.803404		Chr5	5514883	5516936	AT5G16770	2.89805	3.78704
AT2G45210	Chr2	18641565	18642704	2.46541	1.9262		Chr5	6306827	6309419	AT5G18910	2.4296	2.87417
AT2G45430	Chr2	18727560	18728935	5.0685	1.91042		Chr5	7076889	7079077	AT5G20860	1.77742	2.45635
AT2G45450	Chr2	18733274	18734127	1.69402	1.49134		Chr5	7192238	7198324	AT5G21150	1.52302	1.73613
AT2G45750	Chr2	18842538	18845467	1.7224	1.56312		Chr5	7379198	7381935	AT5G22300	1.5675	2.67807
AT2G46495	Chr2	19084133	19085704	2.25752	1.62287		Chr5	7426313	7427964	AT5G22410	1.34515	1.74772
AT2G46740	Chr2	19205156	19207455	3.45928	3.45904		Chr5	7810682	7815039	AT5G23210	2.17667	2.90491
AT2G46750	Chr2	19208319	19210958	4.33595	3.92432		Chr5	8126011	8127336	AT5G24040	2.77021	3.30858
AT2G47460	Chr2	19476336	19479478	2.67236	1.24375		Chr5	8332472	8334066	AT5G24410	2.3514	2.95454
AT2G47550	Chr2	19508979	19511792	3.21373	2.9556		Chr5	8336613	8338008	AT5G24420	2.70384	4.37803
AT2G47560	Chr2	19511716	19512728	1.62316	1.49287		Chr5	8370586	8372847	AT5G24520	0.863245	0.891317
AT2G48090	Chr2	19669109	19669764	2.19035	1.54813		Chr5	8616008	8616869	AT5G25010	0.747198	1.04522
AT3G01513	Chr3	201919	202740	1.70685	1.35982		Chr5	9300415	9301990	AT5G26730	0.97937	1.52389
AT3G01516	Chr3	207335	208086	3.43814	3.09525		Chr5	15141787	15143492	AT5G38000	2.74606	3.61955
AT3G01900	Chr3	312358	313849	3.43733	3.41898		Chr5	15320506	15324061	AT5G38340	1.298	1.944
AT3G02220	Chr3	412068	413634	0.78391	0.71197		Chr5	15426809	15428710	AT5G38540	2.36246	2.98421
AT3G02230	Chr3	415392	417547	0.813545	0.711384		Chr5	16011071	16012484	AT5G40000	1.01129	1.26604
AT3G02240	Chr3	418458	419164	3.58924	2.72789		Chr5	16512325	16513500	AT5G41290	2.60439	3.25836
AT3G03530	Chr3	842498	845043	1.92761	1.36098		Chr5	16515003	16516102	AT5G41300	1.52015	2.57312
AT3G03660	Chr3	889508	892162	4.52354	3.79489		Chr5	16998267	16998816	AT5G42510	1.29842	1.78514
AT3G04060	Chr3	1053365	1055163	3.77693	3.14007		Chr5	17142819	17144160	AT5G42750	1.45698	2.36743
AT3G04070	Chr3	1061525	1063103	2.57636	1.53178		Chr5	17485438	17486191	AT5G43520	2.04503	3.50933
AT3G04560	Chr3	1227359	1229408	0.812014	0.77643		Chr5	17585762	17588597	AT5G43760	1.21983	1.55088
AT3G04570	Chr3	1230985	1232328	5.08888	0.76369		Chr5	18191574	18193207	AT5G45080	1.8819	3.13086
AT3G06360	Chr3	1928901	1929446	3.80859	2.53403		Chr5	18454315	18457277	AT5G45530	1.3711	1.55411
AT3G06370	Chr3	1930395	1934073	1.58613	0.932447		Chr5	18634078	18636699	AT5G45950	2.1484	2.59734
AT3G07490	Chr3	2391188	2391650	3.39282	2.78347		Chr5	18759101	18763358	AT5G46260	2.10307	3.17547
AT3G08040	Chr3	2566276	2572151	2.4533	1.97362		Chr5	18764348	18769090	AT5G46270	0.968244	1.91762
AT3G08770	Chr3	2664129	2664834	2.40802	1.9262		Chr5	19971908	19974444	AT5G49270	2.20091	2.41651
AT3G09260	Chr3	2840476	2843781	1.95535	1.02555		Chr5	20222668	20227267	AT5G49770	2.25492	3.04487
AT3G09270	Chr3	2848288	2849289	2.71156	0.891979		Chr5	20259907	20262585	AT5G49850	1.34736	1.58012
AT3G10960	Chr3	3424812	3426997	1.58411	0.714183		Chr5	20907286	20909340	AT5G51470	2.47796	3.41479
AT3G11130	Chr3	3482148	3491908	0.882846	0.845216		Chr5	20913552	20915606	AT5G51490	2.76235	3.43066
AT3G11150	Chr3	3492866	3494653	4.05379	3.40708		Chr5	21216854	21218226	AT5G52250	1.17351	1.75848
AT3G11200	Chr3	3508041	3510627	0.921208	0.796048		Chr5	21230352	21236554	AT5G52290	0.528124	0.64175
AT3G11290	Chr3	3535609	3537843	0.783406	0.748941		Chr5	21925983	21927243	AT5G54030	1.49888	1.85952
AT3G11420	Chr3	3591474	3594570	1.00205	0.872064		Chr5	22025285	22030099	AT5G54250	1.96772	3.09548
AT3G11430	Chr3	3595764	3597952	4.3963	3.9792		Chr5	22152724	22154429	AT5G54530	0.982513	2.15777
AT3G12710	Chr3	4040323	4041982	2.00726	1.18067		Chr5	22711401	22712364	AT5G56080	4.05784	5.68534
AT3G12977	Chr3	4143725	4145967	1.69623	1.32508		Chr5	22858508	22860062	AT5G56450	0.758865	0.847263
AT3G13432	Chr3	4371469	4371987	2.97144	2.39812		Chr5	23286236	23287571	AT5G57500	1.23225	1.50785
AT3G13730	Chr3	4497975	4500920	2.21557	1.0693		Chr5	23765813	23768049	AT5G58860	4.74521	5.49632
AT3G14260	Chr3	4747768	4748819	3.11178	2.5571		Chr5	23870097	23873720	AT5G59130	1.00144	1.25042
AT3G14362	Chr3	4793677	4794417	2.20209	1.95952		Chr5	23933403	23934690	AT5G59340	2.96798	3.434
AT3G14370	Chr3	4797844	4799504	3.27618	2.57283		Chr5	24543359	24546269	AT5G60980	0.812363	0.868632
AT3G15240	Chr3	5133605	5135902	1.88483	1.06596		Chr5	25064834	25066111	AT5G62420	1.22753	1.85318
AT3G15690	Chr3	5316915	5319613	0.874979	0.805116
AT3G16400	Chr3	5566085	5568545	2.21919	1.09908
AT3G16420	Chr3	5579385	5580953	2.04457	1.96203
AT3G16460	Chr3	5592581	5595717	1.34562	1.18725
AT3G18280	Chr3	6267048	6267643	3.68418	2.69384
AT3G18560	Chr3	6393909	6394785	3.58586	2.51081
AT3G19390	Chr3	6722988	6725027	0.806363	0.735539
AT3G20640	Chr3	7210406	7213299	3.60792	2.47504
AT3G20840	Chr3	7300674	7303693	3.52684	3.42983
AT3G21230	Chr3	7448039	7452000	1.07866	0.87314
AT3G21700	Chr3	7644349	7646383	1.07156	0.932933
AT3G21710	Chr3	7648341	7649799	4.35422	4.06726
AT3G21770	Chr3	7673275	7674839	1.88386	0.982312
AT3G22260	Chr3	7870891	7873548	0.832498	0.763141
AT3G22800	Chr3	8062887	8064556	2.23464	1.96282
AT3G22830	Chr3	8078819	8081051	3.56394	2.61835
AT3G22840	Chr3	8084446	8085560	3.93679	2.78587
AT3G23430	Chr3	8387507	8393296	1.75679	1.21611
AT3G23630	Chr3	8488694	8490210	3.64933	3.46446
AT3G24240	Chr3	8780423	8784368	0.866185	0.687559
AT3G24310	Chr3	8811130	8812364	0.993493	0.819935
AT3G24770	Chr3	9046532	9047463	3.59515	2.43041
AT3G25780	Chr3	9409289	9410567	2.00213	1.07526
AT3G25790	Chr3	9413126	9415003	3.92759	2.54902
AT3G26460	Chr3	9683872	9684657	2.92743	2.75165
AT3G27473	Chr3	10169241	10171230	1.42332	1.06593
AT3G30350	Chr3	11960416	11961856	3.27271	3.22477
AT3G44326	Chr3	16000878	16002118	3.77111	1.54936
AT3G44700	Chr3	16236342	16237736	2.79579	2.33749
AT3G45090	Chr3	16490599	16494762	0.822011	0.73674
AT3G45160	Chr3	16533450	16534082	3.93248	3.23449
AT3G47980	Chr3	17710373	17712866	3.43152	0.975894
AT3G49110	Chr3	18200663	18203142	3.06863	2.86775
AT3G49120	Chr3	18207650	18210132	2.59566	1.79998
AT3G49380	Chr3	18311908	18313490	1.7197	1.03613
AT3G49690	Chr3	18427734	18429201	3.65129	3.55482
AT3G49820	Chr3	18481236	18481722	2.40963	1.26764
AT3G49830	Chr3	18482382	18483940	1.04441	0.876408
AT3G50190	Chr3	18609113	18611169	1.31024	1.10627
AT3G50760	Chr3	18868064	18869384	4.28325	2.00019
AT3G51860	Chr3	19239426	19242913	1.83774	1.34644
AT3G52480	Chr3	19452253	19453162	2.91533	1.61664
AT3G52490	Chr3	19455698	19458919	3.10217	2.39961
AT3G54040	Chr3	20013760	20015437	3.07987	2.61185
AT3G55940	Chr3	20747786	20750184	1.35207	0.815774
AT3G59850	Chr3	22109163	22111609	2.89536	2.41055
AT3G60140	Chr3	22216671	22220824	3.42366	1.93579
AT3G60700	Chr3	22438401	22439205	3.61556	1.86137
AT3G60720	Chr3	22441770	22443771	2.53692	1.78235
AT3G60870	Chr3	22493203	22494001	3.80755	3.53692
AT3G61270	Chr3	22678150	22680379	2.56487	1.98243
AT3G62730	Chr3	23207853	23209471	2.80861	2.24924
AT4G00940	Chr4	403319	404810	3.75237	2.34692
AT4G01140	Chr4	490748	492199	1.84956	1.33625
AT4G01350	Chr4	560258	562438	1.78264	1.55462
AT4G04830	Chr4	2445793	2447086	1.92291	1.43298
AT4G08290	Chr4	5238905	5241034	1.37555	1.3128
AT4G08300	Chr4	5244890	5248342	1.31918	1.13896
AT4G09030	Chr4	5792206	5792790	3.69351	1.22459
AT4G10380	Chr4	6431235	6434822	3.8375	3.01533
AT4G11290	Chr4	6869952	6871661	2.79292	2.70159
AT4G11310	Chr4	6883550	6885517	3.38146	3.14679
AT4G11320	Chr4	6887253	6889059	3.08847	1.89685
AT4G11600	Chr4	7009768	7011375	1.01938	0.972031
AT4G12050	Chr4	7219823	7221328	4.68614	2.46599
AT4G12060	Chr4	7228006	7229941	1.0721	0.743913
AT4G12270	Chr4	7297807	7299930	2.32509	2.08926
AT4G13130	Chr4	7647388	7649831	1.29183	1.14172
AT4G13310	Chr4	7750304	7753133	2.30196	2.10437
AT4G13345	Chr4	7765072	7769688	1.29467	0.942349
AT4G13630	Chr4	7933860	7936565	0.903236	0.684473
AT4G13660	Chr4	7946154	7948376	1.9517	1.01141
AT4G14465	Chr4	8320629	8322201	4.9118	1.18567
AT4G14630	Chr4	8392840	8393813	1.8663	1.84703
AT4G14640	Chr4	8397711	8400076	1.63119	1.5229
AT4G14940	Chr4	8541878	8544566	1.64238	1.44871
AT4G15120	Chr4	8634724	8635561	3.7532	1.34056
AT4G15130	Chr4	8637665	8639581	0.769904	0.734497
AT4G15150	Chr4	8641671	8642278	2.1485	1.08793
AT4G15610	Chr4	8909063	8910908	2.33521	1.24847
AT4G16220	Chr4	9182282	9183922	1.72525	1.66802
AT4G16260	Chr4	9200009	9201552	1.90386	1.34514
AT4G16600	Chr4	9350038	9352707	1.69735	0.953329
AT4G16770	Chr4	9434392	9437172	1.24236	0.922109
AT4G17030	Chr4	9581585	9583290	3.0992	2.47088
AT4G17785	Chr4	9881634	9883432	3.31865	3.29021
AT4G17790	Chr4	9891050	9892807	0.926942	0.860493
AT4G17800	Chr4	9895289	9896668	4.74159	0.864347
AT4G18040	Chr4	10016566	10018228	0.88603	0.827124
AT4G18425	Chr4	10181333	10182140	1.548	1.10234
AT4G18610	Chr4	10250697	10251542	5.13014	1.67922
AT4G18630	Chr4	10257077	10258943	0.888515	0.708318
AT4G18640	Chr4	10259677	10263764	0.94151	0.690587
AT4G18650	Chr4	10263968	10265439	2.40948	1.69032
AT4G19710	Chr4	10724854	10729768	0.905931	0.789882
AT4G19720	Chr4	10730362	10731750	3.42336	2.50374
AT4G19980	Chr4	10828152	10828536	3.1929	1.5977
AT4G20210	Chr4	10913612	10918282	2.22897	1.82729
AT4G20230	Chr4	10924120	10926758	2.62847	2.09809
AT4G20235	Chr4	10929145	10931277	3.0347	1.63069
AT4G20310	Chr4	10961611	10964056	0.756872	0.698622
AT4G21600	Chr4	11485118	11487416	1.17732	0.792761
AT4G22110	Chr4	11711313	11714228	3.18679	2.68844
AT4G22810	Chr4	11984139	11985702	4.54574	3.8403
AT4G23515	Chr4	12271381	12272842	1.14229	1.08451
AT4G23690	Chr4	12338870	12339747	2.74793	2.08757
AT4G24060	Chr4	12503781	12505646	4.61577	2.27074
AT4G25400	Chr4	12981294	12982468	5.11722	2.87462
AT4G25410	Chr4	12985754	12987217	4.53417	4.11508
AT4G26255	Chr4	13293940	13296465	1.97436	1.87592
AT4G27250	Chr4	13642675	13644479	1.60357	1.19629
AT4G27800	Chr4	13851861	13854191	0.831984	0.795156
AT4G28840	Chr4	14240796	14242611	4.89807	3.76795
AT4G29100	Chr4	14340999	14344930	3.21424	1.97495
AT4G29130	Chr4	14352036	14355103	0.798417	0.772061
AT4G29930	Chr4	14644008	14647591	1.83883	1.12792
AT4G30170	Chr4	14762840	14764627	3.7265	3.25773
AT4G30190	Chr4	14770498	14776058	0.735256	0.712577
AT4G30450	Chr4	14886026	14886675	2.80533	2.4007
AT4G30460	Chr4	14888979	14889802	3.6665	2.95805
AT4G31910	Chr4	15441081	15443900	3.341	2.09261
AT4G32860	Chr4	15856610	15857359	3.43679	1.92684
AT4G33730	Chr4	16185097	16185616	4.13777	3.06608
AT4G33770	Chr4	16193421	16196428	0.706284	0.694021
AT4G33800	Chr4	16210008	16211409	3.54844	2.76066
AT4G33810	Chr4	16213323	16215594	2.87461	2.56519
AT4G35030	Chr4	16675701	16678206	1.30525	1.2059
AT4G35160	Chr4	16730759	16732811	3.29669	1.85383
AT4G35390	Chr4	16829325	16830692	3.59242	1.78552
AT4G36740	Chr4	17314558	17316374	3.58145	2.4553
AT4G37400	Chr4	17584050	17586360	3.04957	2.60135
AT4G37510	Chr4	17626103	17628947	0.749899	0.639453
AT4G37520	Chr4	17631561	17633249	1.41757	1.12201
AT4G37530	Chr4	17634783	17636288	1.84578	1.57746
AT4G37650	Chr4	17691785	17693760	4.2242	2.81085
AT4G39410	Chr4	18332877	18334789	4.92227	4.56156
AT4G39940	Chr4	18519716	18521568	2.25493	1.8583
AT4G39950	Chr4	18525245	18527579	3.79967	3.50424
AT5G01040	Chr5	13127	16173	1.32961	1.05238
AT5G02360	Chr5	500625	502329	1.61899	1.49202
AT5G03840	Chr5	1024640	1025812	3.95143	3.71161
AT5G03890	Chr5	1047149	1047689	3.30462	2.19755
AT5G03900	Chr5	1048294	1052387	0.907204	0.817578
AT5G04370	Chr5	1231696	1234147	2.73463	2.45824
AT5G04470	Chr5	1266624	1267416	1.65605	0.942458
AT5G05600	Chr5	1672119	1674739	1.71382	1.50406
AT5G05790	Chr5	1740571	1742028	2.37945	1.49239
AT5G05970	Chr5	1795293	1799527	0.828665	0.675893
AT5G06330	Chr5	1934738	1935644	4.11614	2.39125
AT5G06490	Chr5	1977995	1978589	3.88846	3.44226
AT5G06730	Chr5	2079954	2081684	1.98197	1.31104
AT5G06740	Chr5	2084093	2086052	0.989645	0.78647
AT5G06839	Chr5	2120526	2126456	3.52556	3.17815
AT5G07010	Chr5	2174677	2176106	3.29619	2.65725
AT5G08360	Chr5	2689712	2690974	2.12211	0.680688
AT5G08370	Chr5	2690878	2693550	0.783897	0.634645
AT5G09978	Chr5	3120712	3121864	2.18225	1.20706
AT5G10510	Chr5	3315528	3320202	1.74336	1.0349
AT5G10580	Chr5	3347420	3350071	3.26977	2.23087
AT5G10620	Chr5	3355319	3356615	0.727756	0.698006
AT5G10625	Chr5	3358786	3359781	4.17255	3.85729
AT5G11180	Chr5	3557260	3561575	1.62617	1.51284
AT5G12330	Chr5	3987374	3989833	4.25385	2.35863
AT5G12340	Chr5	3992947	3993610	4.68717	4.25809
AT5G13910	Chr5	4482449	4483085	2.37873	1.8539
AT5G14340	Chr5	4623366	4624847	3.99658	3.8817
AT5G14920	Chr5	4826478	4827980	1.87843	1.83633
AT5G14940	Chr5	4831747	4834395	2.93437	1.83322
AT5G15120	Chr5	4898736	4900581	1.34004	1.09619
AT5G15130	Chr5	4904346	4907094	3.74454	3.66277
AT5G15490	Chr5	5027638	5030194	0.753275	0.705384
AT5G16600	Chr5	5438290	5440245	2.35678	1.02848
AT5G17260	Chr5	5675322	5677912	2.67929	2.29737
AT5G17330	Chr5	5711011	5715075	3.13667	1.01664
AT5G17450	Chr5	5755321	5756888	1.71989	1.48324
AT5G17710	Chr5	5839342	5841728	0.884426	0.820793
AT5G17790	Chr5	5869709	5872718	0.909878	0.705932
AT5G17800	Chr5	5877188	5879331	3.99988	2.77106
AT5G17820	Chr5	5887905	5890193	3.45415	3.3233
AT5G18860	Chr5	6290675	6295811	0.933678	0.859608
AT5G19030	Chr5	6357382	6359124	0.846758	0.778288
AT5G19100	Chr5	6408241	6409417	1.58343	1.32423
AT5G19110	Chr5	6411560	6413170	3.82286	2.97386
AT5G19520	Chr5	6585420	6588936	0.763017	0.735122
AT5G19530	Chr5	6588957	6591363	2.24083	1.96363
AT5G19560	Chr5	6603290	6606448	1.43543	1.11551
AT5G19900	Chr5	6728159	6730045	0.697087	0.67759
AT5G20810	Chr5	7043897	7045712	1.36517	0.981451
AT5G20820	Chr5	7046750	7047396	4.7498	4.54026
AT5G23000	Chr5	7696134	7697927	4.4888	4.24626
AT5G23010	Chr5	7703091	7706896	3.04038	2.92121
AT5G23020	Chr5	7718120	7721839	3.24474	2.76257
AT5G23170	Chr5	7798196	7799448	3.37022	1.54587
AT5G23190	Chr5	7803140	7805815	1.62055	1.28225
AT5G23940	Chr5	8076328	8079793	2.50969	2.12473
AT5G24090	Chr5	8143698	8145252	3.57638	2.71975
AT5G24100	Chr5	8148615	8151308	1.3874	1.06575
AT5G24530	Chr5	8378832	8383401	1.29857	1.24476
AT5G25160	Chr5	8687456	8688415	3.61809	1.73044
AT5G25890	Chr5	9033414	9034834	1.64443	0.75621
AT5G26310	Chr5	9234684	9236385	3.33159	2.73451
AT5G26320	Chr5	9238309	9241236	1.69582	1.3441
AT5G35760	Chr5	13934107	13934782	1.90949	0.724339
AT5G38010	Chr5	15158274	15160212	2.7944	2.50932
AT5G38030	Chr5	15171245	15175457	3.88317	3.80178
AT5G38344	Chr5	15325830	15326988	1.86513	1.64855
AT5G38350	Chr5	15328658	15331528	1.29564	1.25384
AT5G38450	Chr5	15393753	15397279	2.57902	1.98467
AT5G39710	Chr5	15895728	15897972	0.78931	0.731769
AT5G39720	Chr5	15899645	15900653	2.9535	2.57087
AT5G40770	Chr5	16314849	16316719	0.755206	0.712888
AT5G40780	Chr5	16323650	16327281	1.45406	1.36431
AT5G41315	Chr5	16529454	16532879	2.81952	2.2106
AT5G41570	Chr5	16624213	16625977	3.62918	3.44955
AT5G41590	Chr5	16632085	16633896	2.29125	1.58217
AT5G42440	Chr5	16973303	16974574	1.33121	0.9999
AT5G42500	Chr5	16994239	16994930	1.68239	1.17487
AT5G42620	Chr5	17066277	17071963	0.92354	0.808133
AT5G42630	Chr5	17073778	17075856	4.44882	4.1512
AT5G42680	Chr5	17114097	17115417	1.93542	1.49793
AT5G43030	Chr5	17258990	17260685	3.1907	2.85145
AT5G44380	Chr5	17878721	17881440	1.35115	1.13921
AT5G45090	Chr5	18202752	18205000	2.32335	2.19932
AT5G45280	Chr5	18345594	18349695	1.29821	1.0496
AT5G45970	Chr5	18643733	18645966	2.84067	2.523
AT5G48100	Chr5	19489326	19492744	2.21357	1.38589
AT5G48110	Chr5	19501156	19504357	3.2528	1.55302
AT5G48560	Chr5	19684005	19687151	1.0476	0.756466
AT5G49660	Chr5	20161205	20164729	1.35025	1.18229
AT5G49800	Chr5	20234641	20236184	2.31552	2.17683
AT5G49810	Chr5	20239342	20246380	0.876764	0.724143
AT5G50120	Chr5	20382614	20383874	2.8192	1.82794
AT5G50130	Chr5	20389996	20393263	3.55601	2.85001
AT5G50300	Chr5	20466067	20468124	4.06442	3.36419
AT5G50760	Chr5	20644660	20645469	3.6567	3.28156
AT5G51060	Chr5	20757283	20762431	1.42223	1.20049
AT5G51510	Chr5	20921432	20922978	0.973778	0.898222
AT5G51590	Chr5	20956566	20959113	1.63595	0.731464
AT5G51780	Chr5	21034822	21036773	4.38886	1.69559
AT5G51920	Chr5	21097105	21098959	1.12065	0.897465
AT5G51930	Chr5	21101122	21103568	2.23433	1.50339
AT5G52270	Chr5	21221642	21222600	1.81972	1.40605
AT5G53110	Chr5	21529021	21533159	0.978044	0.891781
AT5G54145	Chr5	21972464	21973083	2.85696	1.34469
AT5G54148	Chr5	21975784	21977104	2.02541	1.34045
AT5G54790	Chr5	22253985	22255663	4.24073	3.6353
AT5G54800	Chr5	22261270	22263921	1.82813	0.736815
AT5G56610	Chr5	22916709	22918338	1.0384	0.961903
AT5G57090	Chr5	23100692	23104735	3.5141	2.2508
AT5G58500	Chr5	23645534	23646083	2.54436	1.76229
AT5G58660	Chr5	23701466	23703988	2.77731	1.79919
AT5G58670	Chr5	23704230	23706800	1.21499	1.09516
AT5G59520	Chr5	23991252	23992798	4.13401	3.90051
AT5G60890	Chr5	24494690	24496351	1.63603	1.01538
AT5G63450	Chr5	25408894	25410573	2.50846	2.06335
AT5G64690	Chr5	25862868	25864778	2.39292	1.63987
AT5G64700	Chr5	25865171	25866927	3.45466	3.09991
AT5G65080	Chr5	25997503	26002465	2.2605	2.11237
AT5G65790	Chr5	26322947	26324578	2.91124	2.57705
AT5G65800	Chr5	26330745	26332812	3.32588	2.71389
AT5G66870	Chr5	26705861	26708676	4.53807	4.12075
