# Supplementary material for: Polycomb-dependent differential chromatin compartmentalization determines gene coregulation in Arabidopsis
Source: HighWire-hosted journal article supplement (doi:10.1101/gr.273771.120), 2021-06-03
Supplement: Supplemental_Table_S8.xlsx [file Supplemental_Table_S8.xlsx]

## Sheet: S8
Supplementary Table S8: Differentially expressed genes spanning Top 2k HiChIP Shoot loops
Gene1	log2FoldChange.1	padj.1	Gene2	log2FoldChange.2	padj.2
AT1G79320	-4.85692	8.29e-46	AT1G79310	-4.50663	2.39421e-25
AT1G79330	-2.61993	1.20361e-24	AT1G79310	-4.50663	2.39421e-25			LFC_1>0	LFC_1<0
AT3G04570	-5.44179	1.98756e-40	AT3G04560	-0.697975	1.44429e-09		LFC_2>0	194	362
AT5G48400	-3.12326	7.02204e-07	AT5G48390	-0.995128	0.021048		LFC_2<0	411	1033
AT1G72125	-5.48726	1.04893e-37	AT1G72120	-3.18708	3.22814e-11
AT3G21720	-2.79286	9.5667e-06	AT3G21710	-4.91143	3.13699e-55		X2 (3, N = 2000) = 809.38, p = 3.998692e-175
AT4G14450	2.8059	1.40676e-09	AT4G14440	0.808882	0.000316986
AT1G53990	-5.66366	5.40753e-47	AT1G53950	-6.86269	5.1049e-17
AT5G64110	3.33692	4.46465e-83	AT5G64100	-4.9992	4.65088e-45
AT3G21710	-4.91143	3.13699e-55	AT3G21700	-0.691795	0.00633114
AT4G18640	-1.70826	3.67656e-23	AT4G18630	-3.27729	7.85776e-23
AT3G24310	-5.32194	8.45104e-20	AT3G24300	-5.43633	7.97428e-45
AT1G20910	0.399063	0.00270658	AT1G20900	-3.48517	3.43518e-23
AT3G16450	-3.26201	9.57923e-16	AT3G16440	-5.85006	5.97478e-31
AT2G18380	0.715019	0.0101249	AT2G18360	-3.46414	6.6236e-65
AT1G76510	0.259523	0.0279398	AT1G76500	-3.67119	6.67182e-35
AT3G21720	-2.79286	9.5667e-06	AT3G21710	-4.91143	3.13699e-55
AT4G25410	-2.6638	5.58492e-10	AT4G25400	-5.74654	2.8521e-26
AT4G28890	-4.92728	1.20203e-40	AT4G28880	-0.550066	0.0143683
AT5G54250	6.93118	7.60836e-116	AT5G54230	-4.66315	6.83843e-52
AT5G58510	-0.29791	0.00903853	AT5G58500	-2.38188	2.03623e-08
AT4G17800	-5.11432	4.80907e-32	AT4G17790	-0.903567	1.57404e-22
AT1G14240	-4.23284	2.31321e-22	AT1G14230	-0.814159	5.4317e-10
AT1G17960	-2.50029	9.01477e-16	AT1G17950	-3.96404	8.34914e-19
AT1G78370	3.7878	2.00715e-204	AT1G78360	-3.90843	1.01823e-13
AT4G37660	-0.4129	0.0121218	AT4G37650	-0.957016	1.59011e-05
AT1G76440	0.716953	2.18193e-06	AT1G76430	-5.09158	2.02945e-24
AT2G46760	-1.73175	1.06387e-08	AT2G46750	-5.48863	2.85073e-43
AT1G55590	-0.282475	0.0035953	AT1G55580	-3.65586	7.77289e-21
AT5G01060	-5.03022	1.26711e-21	AT5G01050	-5.2687	9.29581e-49
AT1G70170	-6.18539	4.27067e-28	AT1G70160	0.779568	0.000299809
AT1G67760	-3.30064	2.84093e-10	AT1G67750	-1.0531	6.64884e-05
AT3G47050	-6.42586	8.52905e-17	AT3G47040	-6.1658	1.7304e-20
AT3G04580	-0.845094	5.01692e-25	AT3G04570	-5.44179	1.98756e-40
AT1G70860	-5.00535	2.63585e-25	AT1G70850	-5.15278	2.68246e-19
AT1G67030	-4.92814	5.49189e-29	AT1G67020	-2.30215	0.0010541
AT2G18380	0.715019	0.0101249	AT2G18360	-3.46414	6.6236e-65
AT2G01530	-5.87797	4.19703e-27	AT2G01520	-6.0596	6.36686e-11
AT5G01050	-5.2687	9.29581e-49	AT5G01040	-1.95327	7.7654e-10
AT1G62810	-1.83346	3.21604e-20	AT1G62800	-2.15312	2.61407e-102
AT1G48510	-5.76486	9.75267e-30	AT1G48500	-3.74518	1.25061e-34
AT3G52490	-2.2072	9.88396e-17	AT3G52480	-1.27194	3.0948e-06
AT5G56210	0.896338	2.86333e-08	AT5G56200	-3.30314	8.17065e-13
AT5G63370	-0.419738	2.08741e-06	AT5G63350	-1.595	0.0296947
AT2G29740	-2.33506	3.71357e-06	AT2G29730	-0.98104	3.16501e-05
AT3G16420	-1.48348	0.00673682	AT3G16410	-4.06211	3.80505e-40
AT1G35330	-5.47954	2.10885e-11	AT1G35320	-2.63216	4.17619e-30
AT1G80820	-3.46808	7.84468e-27	AT1G80810	0.472135	0.0385461
AT3G13432	-5.33457	1.26309e-16	AT3G13430	-0.486352	0.0238375
AT2G17430	-2.62464	6.29441e-39	AT2G17420	-2.31224	2.40053e-37
AT3G16460	-2.87891	2.02134e-10	AT3G16450	-3.26201	9.57923e-16
AT1G66280	-5.95777	6.66448e-28	AT1G66270	-5.78626	5.8273e-25
AT4G30170	-5.06997	1.12934e-88	AT4G30160	-0.442387	4.16118e-08
AT2G27010	-5.39978	1.35433e-28	AT2G27000	-5.41539	3.9615e-51
AT2G46760	-1.73175	1.06387e-08	AT2G46750	-5.48863	2.85073e-43
AT5G20885	-1.1136	3.73665e-07	AT5G20870	-0.853681	0.0294228
AT4G17800	-5.11432	4.80907e-32	AT4G17790	-0.903567	1.57404e-22
AT1G30650	-4.31343	1.22381e-114	AT1G30640	-1.38342	5.19883e-17
AT3G50300	-5.46402	4.02685e-62	AT3G50290	-4.56364	1.09559e-14
AT3G21710	-4.91143	3.13699e-55	AT3G21700	-0.691795	0.00633114
AT2G30350	1.01455	5.64383e-06	AT2G30340	-5.10924	8.50866e-23
AT1G53950	-6.86269	5.1049e-17	AT1G53940	-4.98257	1.54283e-38
AT4G33350	2.12551	7.78672e-68	AT4G33330	-2.48724	5.2568e-12
AT1G29025	-5.44124	2.33656e-51	AT1G29020	-4.00075	1.30636e-40
AT4G15130	0.701855	0.000382638	AT4G15120	-3.82143	5.06564e-23
AT2G46750	-5.48863	2.85073e-43	AT2G46740	-4.53993	4.61185e-24
AT2G48090	-2.69023	1.11199e-18	AT2G48080	-2.81152	4.5016e-16
AT4G28850	-7.11005	1.07108e-10	AT4G28840	-5.04814	4.7112e-25
AT5G19050	-0.858445	1.48685e-05	AT5G19040	-4.15937	4.2455e-50
AT2G18990	0.260693	0.0298323	AT2G18980	-5.30335	1.31564e-69
AT4G33460	1.45404	6.24649e-28	AT4G33450	-5.78802	1.94312e-21
AT5G58670	-0.837151	0.00151837	AT5G58660	-1.99949	0.000450076
AT5G58700	-1.62971	1.10946e-32	AT5G58690	-2.2114	1.26809e-34
AT2G31085	-4.3956	1.06857e-35	AT2G31083	-6.24796	1.03012e-31
AT4G13310	-5.84363	7.15378e-18	AT4G13300	-6.1067	4.59129e-18
AT1G67150	-6.45698	1.9435e-15	AT1G67148	-5.83099	2.67367e-27
AT2G36895	1.82667	5.27941e-11	AT2G36890	-3.43974	1.03921e-41
AT5G58510	-0.29791	0.00903853	AT5G58500	-2.38188	2.03623e-08
AT3G02240	-3.43648	3.12227e-26	AT3G02230	-2.05964	9.47748e-66
AT1G76510	0.259523	0.0279398	AT1G76500	-3.67119	6.67182e-35
AT2G43690	0.589157	0.0110368	AT2G43680	-0.365056	0.0123097
AT1G53990	-5.66366	5.40753e-47	AT1G53950	-6.86269	5.1049e-17
AT5G43040	-2.48307	6.07508e-18	AT5G43030	-4.7124	1.98551e-34
AT4G20235	-4.42468	1.7986e-16	AT4G20230	-2.6083	1.37776e-21
AT4G31920	-1.30768	4.14061e-15	AT4G31910	-3.66236	1.294e-23
AT1G20910	0.399063	0.00270658	AT1G20900	-3.48517	3.43518e-23
AT1G12200	-1.70816	5.83463e-20	AT1G12160	-5.32593	7.9127e-45
AT3G23180	-4.65245	5.32286e-57	AT3G23175	-5.46738	1.81081e-60
AT3G50210	-0.990391	3.29942e-15	AT3G50200	-2.65113	3.50789e-13
AT5G48400	-3.12326	7.02204e-07	AT5G48390	-0.995128	0.021048
AT5G22950	-0.437223	0.00211304	AT5G22930	-1.8732	1.72112e-21
AT5G39720	-3.06302	6.65433e-06	AT5G39710	0.834384	2.13645e-07
AT1G27180	-1.35096	1.11488e-22	AT1G27170	-2.12581	2.31837e-26
AT1G54000	-5.58652	2.25931e-43	AT1G53990	-5.66366	5.40753e-47
AT1G79330	-2.61993	1.20361e-24	AT1G79320	-4.85692	8.28902e-46
AT4G28850	-7.11005	1.07108e-10	AT4G28840	-5.04814	4.7112e-25
AT1G75120	2.36216	9.90001e-46	AT1G75110	1.27083	2.05972e-06
AT1G35330	-5.47954	2.10885e-11	AT1G35320	-2.63216	4.17619e-30
AT2G34510	3.03113	4.52839e-13	AT2G34500	-4.34388	6.36343e-13
AT3G21230	-1.88253	3.76208e-21	AT3G21220	-0.28191	0.0011369
AT4G25410	-2.6638	5.58492e-10	AT4G25400	-5.74654	2.8521e-26
AT4G01925	-5.48512	9.79778e-35	AT4G01920	-3.01021	1.00258e-20
AT3G21720	-2.79286	9.5667e-06	AT3G21710	-4.91143	3.13699e-55
AT1G54000	-5.58652	2.25931e-43	AT1G53990	-5.66366	5.40753e-47
AT3G07000	-3.09862	2.35512e-22	AT3G06990	-2.03726	9.20981e-12
AT1G16310	-1.93327	2.01649e-21	AT1G16300	-1.83896	9.80412e-18
AT5G66770	0.315912	0.0200915	AT5G66760	-1.20999	3.88467e-12
AT5G51510	-0.596873	7.69547e-07	AT5G51500	-5.67932	6.13098e-14
AT5G04470	-2.46491	2.08296e-18	AT5G04460	-0.477459	3.76213e-07
AT2G23540	-5.39476	2.47618e-36	AT2G23530	-0.906404	0.00023645
AT1G55970	0.933698	9.84496e-07	AT1G55960	1.63932	6.49697e-08
AT5G23190	-5.24692	1.76042e-28	AT5G23170	-1.16519	1.69619e-05
AT4G23515	-4.95173	1.09424e-13	AT4G23510	-5.08942	1.58552e-85
AT1G61380	1.81415	1.03066e-08	AT1G61370	-1.93289	4.39052e-13
AT1G23760	-3.77161	8.03791e-11	AT1G23750	-1.25301	7.5358e-08
AT2G46760	-1.73175	1.06387e-08	AT2G46750	-5.48863	2.85073e-43
AT4G14465	-3.11314	3.22212e-56	AT4G14455	-0.684852	6.86127e-09
AT3G16660	9.50323	1.90885e-72	AT3G16650	1.23041	3.47587e-05
AT3G54970	0.840581	2.56976e-06	AT3G54960	-2.58269	6.64961e-38
AT4G01930	-3.06875	7.60593e-13	AT4G01925	-5.48512	9.79778e-35
AT2G45220	-3.87217	3.92521e-60	AT2G45210	-2.83931	3.19174e-10
AT3G24310	-5.32194	8.45104e-20	AT3G24300	-5.43633	7.97428e-45
AT5G22410	-4.94953	1.39791e-69	AT5G22400	-0.350481	0.00662138
AT5G47960	-3.12527	6.29902e-33	AT5G47950	-5.49938	6.04105e-16
AT3G11200	-0.315677	0.000734297	AT3G11180	-2.73108	0.00293878
AT4G01760	-5.72592	5.3691e-10	AT4G01750	-2.48503	8.62473e-12
AT5G60660	-4.72139	5.04518e-33	AT5G60640	-0.505753	3.23398e-05
AT2G24860	2.32642	3.12621e-22	AT2G24850	3.25011	0.000661165
AT1G20910	0.399063	0.00270658	AT1G20900	-3.48517	3.43518e-23
AT5G50120	-3.01384	2.1416e-17	AT5G50110	1.58874	1.16604e-26
AT3G07970	-4.46866	1.53013e-28	AT3G07960	-0.908032	0.00236808
AT3G16450	-3.26201	9.57923e-16	AT3G16420	-1.48348	0.00673682
AT5G07010	-2.64682	9.65636e-08	AT5G07000	2.56882	7.19203e-18
AT3G53840	-0.986038	0.047096	AT3G53830	2.65942	1.02801e-12
AT4G33350	2.12551	7.78672e-68	AT4G33330	-2.48724	5.2568e-12
AT4G01925	-5.48512	9.79778e-35	AT4G01920	-3.01021	1.00258e-20
AT5G65220	3.89507	4.74612e-72	AT5G65210	-3.29427	5.32433e-115
AT1G12730	0.612526	0.00118672	AT1G12700	0.850754	2.52864e-08
AT5G58510	-0.29791	0.00903853	AT5G58500	-2.38188	2.03623e-08
AT2G28270	-6.92205	1.29172e-16	AT2G28260	0.663982	0.0189849
AT5G45275	-0.690012	0.0141607	AT5G45260	-0.237666	0.0107898
AT1G10480	-4.7086	4.53585e-11	AT1G10450	-0.322848	0.00741572
AT1G66440	-6.15921	2.6948e-22	AT1G66430	2.63307	3.57642e-152
AT5G02020	0.821787	0.00820679	AT5G02010	0.433196	0.00213995
AT1G30650	-4.31343	1.22381e-114	AT1G30640	-1.38342	5.19883e-17
AT5G25900	0.848859	0.000299911	AT5G25890	-3.3008	4.28757e-113
AT3G01180	1.42852	2.75252e-19	AT3G01175	-5.33745	4.09455e-43
AT3G50300	-5.46402	4.02685e-62	AT3G50280	-4.13983	1.05636e-11
AT1G26960	-1.62213	2.95861e-11	AT1G26940	-0.813956	5.60026e-07
AT1G30000	-0.622952	2.55943e-08	AT1G29970	-0.77442	0.0495218
AT3G16470	-1.13607	0.0117718	AT3G16460	-2.87891	2.02134e-10
AT2G21400	-3.25923	1.73581e-05	AT2G21390	-0.441965	2.19988e-05
AT1G14185	-3.08516	1.45284e-36	AT1G14180	0.701289	3.24252e-05
AT4G26880	-5.1308	1.26541e-08	AT4G26870	0.389601	0.0104011
AT4G19380	4.32743	1.18028e-28	AT4G19370	-2.43964	1.60025e-20
AT5G04860	-2.92836	7.7803e-135	AT5G04850	-0.328471	0.0148463
AT1G69320	6.2326	8.96363e-11	AT1G69310	-0.467089	0.0405557
AT3G61280	-1.79643	0.000377837	AT3G61270	-5.83985	1.8546e-58
AT3G20860	-0.533833	0.000152981	AT3G20840	-4.94322	6.3818e-10
AT1G07200	-0.672217	0.0214057	AT1G07180	7.05513	6.94724e-94
AT2G20080	-6.56655	5.50771e-22	AT2G20060	-0.458228	0.00776904
AT4G10380	-3.89752	3.61603e-83	AT4G10370	-5.678	4.24588e-33
AT1G25460	-1.50565	0.000287784	AT1G25450	2.31229	2.35946e-70
AT3G01910	0.624721	2.89606e-08	AT3G01900	-5.31644	9.40212e-16
AT3G11200	-0.315677	0.000734297	AT3G11180	-2.73108	0.00293878
AT1G09000	-1.90517	4.81929e-24	AT1G08990	-5.64644	2.23435e-50
AT1G78380	-0.608156	0.00376162	AT1G78370	3.7878	2.00715e-204
AT1G13970	-2.95755	2.99902e-39	AT1G13960	-0.630401	4.46936e-09
AT1G11545	-0.916785	0.00735336	AT1G11540	-5.10966	2.31118e-58
AT5G27280	1.98766	6.04035e-38	AT5G27270	0.732346	1.00206e-09
AT2G46750	-5.48863	2.85073e-43	AT2G46740	-4.53993	4.61185e-24
AT1G17960	-2.50029	9.01477e-16	AT1G17950	-3.96404	8.34914e-19
AT5G51520	-6.13742	2.72829e-20	AT5G51510	-0.596873	7.69547e-07
AT5G54050	-5.60894	8.33764e-11	AT5G54040	-4.83936	7.57038e-16
AT3G52490	-2.2072	9.88396e-17	AT3G52470	-1.68156	8.16045e-34
AT5G08070	8.21204	2.73308e-14	AT5G08060	-0.396185	0.00793043
AT1G10480	-4.7086	4.53585e-11	AT1G10450	-0.322848	0.00741572
AT4G14940	-1.71202	4.52313e-26	AT4G14930	1.86175	6.11777e-51
AT2G38390	-4.82545	6.19415e-27	AT2G38380	-5.22914	4.2798e-52
AT2G23540	-5.39476	2.47618e-36	AT2G23530	-0.906404	0.00023645
AT1G54000	-5.58652	2.25931e-43	AT1G53990	-5.66366	5.40753e-47
AT1G62262	-4.15771	2.83364e-19	AT1G62260	-0.578347	0.00600263
AT4G30170	-5.06997	1.12934e-88	AT4G30160	-0.442387	4.16118e-08
AT2G41150	-1.71163	6.0632e-07	AT2G41140	0.677938	9.27157e-06
AT2G47470	-0.788209	9.92115e-15	AT2G47460	-4.13586	4.33257e-26
AT1G29290	-3.19394	7.57763e-13	AT1G29280	-4.77599	3.13439e-45
AT3G50290	-4.56364	1.09559e-14	AT3G50280	-4.13983	1.05636e-11
AT3G11180	-2.73108	0.00293878	AT3G11170	3.63916	3.08221e-259
AT3G01910	0.624721	2.89606e-08	AT3G01890	0.527766	0.0456335
AT3G03660	-3.93615	3.91747e-06	AT3G03650	-5.38688	4.44707e-21
AT5G01060	-5.03022	1.26711e-21	AT5G01050	-5.2687	9.29581e-49
AT5G44490	1.71965	0.00113021	AT5G44480	-4.58163	2.13489e-67
AT4G00700	-4.9156	5.21504e-29	AT4G00695	-1.42175	0.0127842
AT2G32500	3.60481	1.401e-51	AT2G32487	3.50107	6.49537e-12
AT3G06370	-1.52345	6.84796e-05	AT3G06360	-1.06891	0.0112318
AT1G52760	-1.58773	2.75167e-20	AT1G52750	-1.23319	4.74672e-05
AT5G05790	-2.52655	1.56869e-22	AT5G05780	-0.29313	3.78282e-06
AT1G05650	-5.49726	1.01036e-09	AT1G05640	-0.852887	8.72933e-06
AT2G24140	-2.83096	3.91617e-13	AT2G24130	-3.45586	1.6222e-06
AT3G26720	-1.00694	1.04327e-11	AT3G26710	4.09301	8.43828e-207
AT3G06370	-1.52345	6.84796e-05	AT3G06360	-1.06891	0.0112318
AT3G16460	-2.87891	2.02134e-10	AT3G16450	-3.26201	9.57923e-16
AT1G32550	4.51889	9.12798e-279	AT1G32530	0.638467	9.85663e-06
AT1G74690	0.445271	0.0498218	AT1G74660	-2.38897	6.19478e-15
AT4G01850	-0.778154	4.05923e-12	AT4G01840	0.633027	5.67067e-05
AT1G65190	4.18171	1.8231e-78	AT1G65180	-2.29343	2.00621e-30
AT1G17960	-2.50029	9.01477e-16	AT1G17950	-3.96404	8.34914e-19
AT2G32620	-6.08963	3.04854e-17	AT2G32610	-5.04225	1.39632e-14
AT4G37080	2.02757	4.34283e-74	AT4G37070	-5.7021	5.26376e-22
AT4G18650	4.11896	3.47221e-08	AT4G18630	-3.27729	7.85776e-23
AT2G25940	-3.24222	3.60757e-49	AT2G25930	-0.47526	0.00088585
AT2G28260	0.663982	0.0189849	AT2G28250	-2.65565	2.84917e-43
AT4G13030	-2.58997	5.47346e-82	AT4G13020	0.216101	0.0199095
AT1G26390	-5.27638	1.20871e-31	AT1G26380	-2.36702	0.000635178
AT4G37520	-1.67733	3.35842e-06	AT4G37510	3.34892	1.34872e-186
AT4G01360	2.06118	0.0225811	AT4G01350	-4.0589	1.96333e-21
AT3G45400	-0.415742	0.00947874	AT3G45390	-2.64176	3.34253e-09
AT1G61600	-0.758176	0.000221726	AT1G61590	-4.78683	4.35692e-46
AT4G14615	-0.459874	0.047313	AT4G14605	1.75593	1.50506e-21
AT2G18380	0.715019	0.0101249	AT2G18370	-5.14697	5.80853e-38
AT5G07350	-0.756716	2.58238e-05	AT5G07340	0.260857	0.0107007
AT3G28970	0.35599	0.020129	AT3G28960	1.84597	6.49047e-05
AT1G23800	-2.06379	2.97025e-12	AT1G23790	1.21188	4.5267e-06
AT4G19985	3.23768	1.15541e-38	AT4G19980	-4.87941	3.69385e-13
AT5G64110	3.33692	4.46465e-83	AT5G64100	-4.9992	4.65088e-45
AT5G60910	3.66955	9.02671e-05	AT5G60890	-1.5175	4.01058e-07
AT1G47600	-5.95029	9.38975e-17	AT1G47580	2.89665	6.83263e-71
AT1G10480	-4.7086	4.53585e-11	AT1G10450	-0.322848	0.00741572
AT4G17840	2.33873	2.90555e-17	AT4G17810	8.06043	5.10972e-57
AT1G53990	-5.66366	5.40753e-47	AT1G53940	-4.98257	1.54283e-38
AT2G25590	-0.972022	2.05035e-12	AT2G25580	-0.526418	0.00155917
AT3G49690	-4.28882	7.85893e-21	AT3G49680	1.57399	1.02379e-19
AT1G05660	-5.88799	1.44146e-26	AT1G05650	-5.49726	1.01036e-09
AT2G20080	-6.56655	5.50771e-22	AT2G20060	-0.458228	0.00776904
AT1G61840	-4.67492	3.89968e-58	AT1G61820	-3.01395	1.96512e-28
AT4G30150	-0.649331	0.000147113	AT4G30140	1.14038	0.0321303
AT3G44330	-0.691477	4.07614e-12	AT3G44326	-5.96548	6.32503e-17
AT3G45090	-0.989709	2.70035e-09	AT3G45070	-5.11728	3.30512e-18
AT3G22800	-5.53082	3.19026e-29	AT3G22790	-0.696747	2.43689e-05
AT1G52160	-0.674356	0.000108221	AT1G52155	-1.04026	2.38749e-14
AT5G49800	0.505224	0.00416778	AT5G49780	-3.87018	1.65165e-31
AT4G22820	-1.34806	6.08654e-08	AT4G22810	-5.41664	1.12727e-28
AT4G18060	0.480255	0.00830381	AT4G18050	0.727519	0.00757612
AT1G53990	-5.66366	5.40753e-47	AT1G53940	-4.98257	1.54283e-38
AT2G38100	-5.91568	7.64446e-10	AT2G38090	-1.46731	1.8541e-08
AT5G50300	-4.4956	4.03113e-11	AT5G50290	-1.16403	0.00090971
AT5G06230	-3.08762	1.14702e-19	AT5G06220	1.67144	1.48226e-28
AT5G61550	-5.00928	7.82033e-51	AT5G61540	0.704276	1.52365e-05
AT1G64060	-2.72482	2.94618e-33	AT1G64050	0.373555	0.0288879
AT5G11570	-3.97153	2.39788e-26	AT5G11560	-0.789255	6.61601e-15
AT1G53645	-0.685759	0.00173742	AT1G53640	-5.65486	6.1404e-15
AT4G25410	-2.6638	5.58492e-10	AT4G25400	-5.74654	2.8521e-26
AT5G41590	-1.36152	0.00567391	AT5G41570	-5.12426	9.02356e-08
AT4G21590	-1.82197	0.000221726	AT4G21585	0.611212	0.0108817
AT4G27800	2.814	2.60779e-62	AT4G27780	-1.08333	1.1713e-05
AT1G17190	-2.69593	9.44417e-09	AT1G17180	-4.63869	8.04792e-12
AT2G47550	-3.87504	7.42969e-16	AT2G47540	-5.83808	1.63336e-43
AT3G04590	0.753807	1.16941e-07	AT3G04570	-5.44179	1.98756e-40
AT5G40230	-3.39548	2.92911e-38	AT5G40210	-2.72593	1.19608e-05
AT5G51930	-5.30196	5.98013e-14	AT5G51920	-1.7658	3.9118e-11
AT4G23700	-4.31437	2.38626e-47	AT4G23690	-4.07992	9.77715e-44
AT1G66440	-6.15921	2.6948e-22	AT1G66430	2.63307	3.57642e-152
AT1G80730	-2.46092	4.42075e-05	AT1G80720	-0.345834	0.0331247
AT1G80820	-3.46808	7.84468e-27	AT1G80810	0.472135	0.0385461
AT1G75260	-0.93303	0.010574	AT1G75250	2.95927	8.55149e-06
AT5G45380	-2.63683	7.01141e-82	AT5G45370	-0.588268	2.19988e-05
AT1G67840	2.89997	4.10726e-46	AT1G67810	-2.88276	8.40357e-10
AT4G19720	-5.76276	8.54639e-27	AT4G19710	1.04694	6.06793e-08
AT3G56990	-0.60557	0.0248546	AT3G56970	1.2141	1.20534e-08
AT2G29060	-4.19752	1.67043e-50	AT2G29050	-0.305132	0.00528616
AT1G78930	0.886505	0.000181125	AT1G78920	-0.387508	5.53638e-05
AT1G14910	0.274393	0.00795946	AT1G14880	5.94856	3.31214e-06
AT4G10370	-5.678	4.24588e-33	AT4G10350	-5.56122	1.71899e-18
AT5G59530	-5.43815	1.02657e-32	AT5G59520	-5.47281	9.75753e-17
AT3G16940	-0.347357	0.0141642	AT3G16920	-1.78589	1.77242e-05
AT5G25160	-4.78179	1.47478e-42	AT5G25150	0.369877	0.0383591
AT5G54050	-5.60894	8.33764e-11	AT5G54040	-4.83936	7.57038e-16
AT5G23220	-5.53186	5.11459e-19	AT5G23210	0.902356	0.00535087
AT3G57830	1.4437	1.53935e-12	AT3G57780	1.57301	9.42253e-12
AT5G45500	-0.801026	0.000129034	AT5G45490	0.719107	0.0221499
AT4G32860	-5.01345	1.29459e-20	AT4G32850	-0.589527	1.85427e-05
AT1G26970	-5.42308	3.59386e-19	AT1G26945	2.16823	3.89198e-25
AT3G52490	-2.2072	9.88396e-17	AT3G52480	-1.27194	3.0948e-06
AT3G26720	-1.00694	1.04327e-11	AT3G26710	4.09301	8.43828e-207
AT1G08350	-0.887673	1.87305e-10	AT1G08340	-2.70488	3.76571e-55
AT2G45970	0.924604	0.00277579	AT2G45950	1.10299	1.74581e-14
AT5G18560	-4.9509	1.457e-14	AT5G18550	0.90024	1.8471e-12
AT3G49110	7.66744	3.6078e-121	AT3G49100	-0.509581	0.000200044
AT1G58410	-2.73487	1.21556e-19	AT1G58400	-2.8033	4.3406e-08
AT5G20885	-1.1136	3.73665e-07	AT5G20850	0.539077	0.00619301
AT4G19820	7.39876	1.76664e-16	AT4G19810	-1.68321	6.35773e-19
AT4G29750	1.82844	1.69953e-53	AT4G29740	-1.49226	0.00545651
AT5G05160	-1.88851	2.47469e-20	AT5G05140	-0.700329	7.00992e-10
AT3G56990	-0.60557	0.0248546	AT3G56980	-0.542568	9.23484e-08
AT1G10417	-1.06328	3.34272e-06	AT1G10410	-1.03174	1.82694e-22
AT1G50400	-1.54467	0.000591671	AT1G50380	-0.335948	0.00098146
AT5G12940	-1.55069	1.40546e-09	AT5G12930	-0.891937	5.67098e-08
AT5G64120	-2.56657	1.53594e-11	AT5G64110	3.33692	4.46465e-83
AT5G11190	6.19349	1.13564e-13	AT5G11180	-5.15136	2.09777e-07
AT5G06740	-5.21082	1.40661e-28	AT5G06730	-4.3719	7.31794e-30
AT5G20830	-3.27514	1.46446e-17	AT5G20820	-3.66765	7.65988e-07
AT1G52160	-0.674356	0.000108221	AT1G52155	-1.04026	2.38749e-14
AT2G48160	0.411714	0.0142708	AT2G48130	-5.25261	4.10763e-57
AT5G05790	-2.52655	1.56869e-22	AT5G05780	-0.29313	3.78282e-06
AT3G53170	2.117	1.307e-19	AT3G53160	-0.878008	0.015468
AT5G17710	1.67093	1.5027e-34	AT5G17700	2.11507	1.43937e-19
AT4G12270	-4.74404	6.11322e-14	AT4G12250	-0.650448	0.0263177
AT3G16340	-2.47987	1.37364e-57	AT3G16320	-0.859408	0.000125187
AT2G25980	-5.3639	3.03704e-17	AT2G25970	0.243787	0.0162658
AT4G19190	0.320012	0.00766985	AT4G19185	-0.828138	6.56452e-17
AT5G54040	-4.83936	7.57038e-16	AT5G54030	-5.4025	8.8408e-15
AT2G38860	-2.15809	6.36345e-11	AT2G38840	-0.551105	3.01682e-10
AT1G66280	-5.95777	6.66448e-28	AT1G66270	-5.78626	5.8273e-25
AT3G51870	2.76484	1.19819e-49	AT3G51860	-1.95482	2.15818e-08
AT5G44770	-5.20374	2.01432e-11	AT5G44750	0.20249	0.0474587
AT4G18440	1.35581	6.57153e-06	AT4G18430	-5.52495	1.04228e-40
AT3G13100	-2.33208	2.97223e-13	AT3G13090	-1.57465	0.000114683
AT2G46740	-4.53993	4.61185e-24	AT2G46710	1.87498	4.31035e-38
AT5G17710	1.67093	1.5027e-34	AT5G17700	2.11507	1.43937e-19
AT5G03290	-0.818526	1.5812e-09	AT5G03280	-0.393804	6.50517e-06
AT1G64930	-5.42571	4.24899e-14	AT1G64920	-6.31698	8.50226e-47
AT3G16660	9.50323	1.90885e-72	AT3G16650	1.23041	3.47587e-05
AT4G13310	-5.84363	7.15378e-18	AT4G13300	-6.1067	4.59129e-18
AT5G07400	-1.06105	1.6651e-07	AT5G07390	-6.31855	5.91208e-68
AT2G29940	5.6035	1.67481e-69	AT2G29910	0.290356	0.0159702
AT2G24640	-0.456191	0.0187103	AT2G24630	0.870431	7.15659e-10
AT3G02250	1.49061	1.10073e-65	AT3G02240	-3.43648	3.12227e-26
AT1G10480	-4.7086	4.53585e-11	AT1G10450	-0.322848	0.00741572
AT1G55320	-1.72746	1.2186e-07	AT1G55310	-0.443703	0.00262797
AT1G75520	-0.627201	0.0179064	AT1G75510	-0.272323	0.0347174
AT2G41160	-0.506692	0.000134845	AT2G41150	-1.71163	6.0632e-07
AT2G24140	-2.83096	3.91617e-13	AT2G24130	-3.45586	1.6222e-06
AT1G61840	-4.67492	3.89968e-58	AT1G61820	-3.01395	1.96512e-28
AT5G65800	-3.74074	1.06857e-12	AT5G65790	-5.16567	1.76259e-73
AT5G51510	-0.596873	7.69547e-07	AT5G51500	-5.67932	6.13098e-14
AT5G50300	-4.4956	4.03113e-11	AT5G50290	-1.16403	0.00090971
AT4G11270	-0.246232	0.0239985	AT4G11260	-0.307366	0.0410063
AT3G50300	-5.46402	4.02685e-62	AT3G50290	-4.56364	1.09559e-14
AT5G41300	-4.5946	1.99403e-19	AT5G41290	-3.61485	5.83325e-12
AT3G49390	-0.739972	4.25522e-19	AT3G49380	-3.306	5.75461e-07
AT5G19110	-3.50907	2.31769e-25	AT5G19100	-3.16721	4.15308e-26
AT3G44326	-5.96548	6.32503e-17	AT3G44320	-3.34817	6.44148e-53
AT1G55390	-2.989	1.96115e-13	AT1G55380	-2.66179	1.02868e-14
AT1G52160	-0.674356	0.000108221	AT1G52155	-1.04026	2.38749e-14
AT2G35700	3.80378	6.28545e-11	AT2G35690	1.08235	8.02017e-25
AT5G38030	-4.64026	1.55206e-20	AT5G38020	-4.273	1.10556e-16
AT1G54340	-0.445162	6.1218e-06	AT1G54330	-1.92039	5.98346e-06
AT1G17590	-1.66098	2.45341e-15	AT1G17580	0.699362	2.07614e-05
AT4G35080	-0.985673	5.00065e-21	AT4G35070	1.4688	4.54414e-05
AT3G20860	-0.533833	0.000152981	AT3G20840	-4.94322	6.3818e-10
AT4G22820	-1.34806	6.08654e-08	AT4G22810	-5.41664	1.12727e-28
AT5G54040	-4.83936	7.57038e-16	AT5G54030	-5.4025	8.8408e-15
AT3G16920	-1.78589	1.77242e-05	AT3G16910	-1.38788	2.11394e-09
AT1G58037	-5.0852	2.09478e-18	AT1G58030	-0.718836	0.0321666
AT1G58410	-2.73487	1.21556e-19	AT1G58400	-2.8033	4.3406e-08
AT3G47940	0.353347	0.0368463	AT3G47930	0.462445	0.0455503
AT2G39410	-3.96541	8.28088e-134	AT2G39400	2.07541	3.93267e-16
AT5G19560	-4.84814	3.02364e-11	AT5G19550	-1.07897	2.78593e-05
AT3G01516	-4.03975	1.17857e-15	AT3G01513	-5.85526	3.44803e-20
AT1G01670	-1.28514	0.000109549	AT1G01660	-2.55323	1.97028e-07
AT3G19900	1.56441	2.89324e-13	AT3G19895	-0.512797	2.93759e-05
AT3G46810	-5.3838	4.67497e-31	AT3G46800	-4.90369	8.67926e-12
AT4G00940	-2.46144	1.24328e-21	AT4G00930	-0.283703	0.042442
AT5G59270	-5.53064	9.03075e-20	AT5G59260	-3.61271	3.72076e-11
AT5G64120	-2.56657	1.53594e-11	AT5G64110	3.33692	4.46465e-83
AT5G14000	-3.01672	9.63426e-28	AT5G13990	-3.77732	2.54478e-19
AT1G51870	-4.99841	6.17323e-13	AT1G51860	-3.94709	1.17391e-46
AT3G50300	-5.46402	4.02685e-62	AT3G50280	-4.13983	1.05636e-11
AT5G14950	-0.427926	0.00207954	AT5G14940	-1.53006	5.94288e-09
AT1G24430	-5.40194	3.51897e-19	AT1G24420	-4.73168	9.47254e-13
AT1G67040	2.86257	1.16833e-35	AT1G67030	-4.92814	5.49189e-29
AT1G07560	-5.55188	1.17987e-20	AT1G07550	-5.89004	3.85914e-58
AT3G16420	-1.48348	0.00673682	AT3G16410	-4.06211	3.80505e-40
AT3G15700	-4.47954	1.73867e-18	AT3G15690	1.79335	1.8987e-90
AT5G43040	-2.48307	6.07508e-18	AT5G43030	-4.7124	1.98551e-34
AT5G11540	-2.96172	2.25872e-07	AT5G11530	0.341802	0.00647053
AT5G38344	-5.57082	1.28035e-26	AT5G38340	-3.27134	2.50843e-79
AT5G49870	-4.1275	6.03217e-10	AT5G49850	-2.38799	3.23269e-07
AT3G21350	0.405059	0.00108545	AT3G21340	-5.35091	9.88421e-17
AT1G56690	-0.563988	0.0334421	AT1G56680	-5.08277	7.52586e-05
AT2G45900	2.17743	1.81997e-09	AT2G45890	-2.02483	1.25784e-11
AT3G62280	-4.26019	4.4763e-29	AT3G62270	-4.3696	5.59175e-60
AT1G44970	-3.38386	2.08894e-87	AT1G44960	-0.676383	1.76901e-05
AT4G35250	4.92444	7.52037e-215	AT4G35240	0.773696	1.15461e-11
AT5G44390	-0.991706	0.00450538	AT5G44380	-5.01517	1.9191e-58
AT1G68400	1.75675	1.58384e-23	AT1G68390	-1.92348	3.66017e-08
AT5G12340	-5.05852	8.4222e-15	AT5G12330	-3.10759	5.92726e-08
AT1G61380	1.81415	1.03066e-08	AT1G61370	-1.93289	4.39052e-13
AT1G10480	-4.7086	4.53585e-11	AT1G10460	-2.82502	1.19279e-15
AT3G21630	-0.8601	0.000901218	AT3G21620	-4.29342	2.32021e-24
AT1G08340	-2.70488	3.76571e-55	AT1G08320	-4.66741	6.36294e-52
AT1G12260	-1.26319	3.14445e-09	AT1G12250	3.99687	5.31649e-63
AT1G80810	0.472135	0.0385461	AT1G80790	0.550308	0.0251637
AT4G15400	-5.75454	3.78426e-30	AT4G15396	-5.45144	1.50194e-14
AT4G35390	-4.28803	1.81072e-50	AT4G35380	-4.7898	3.28502e-89
AT5G50120	-3.01384	2.1416e-17	AT5G50110	1.58874	1.16604e-26
AT3G09260	-3.32344	4.0473e-12	AT3G09240	-4.39272	5.87859e-27
AT5G17710	1.67093	1.5027e-34	AT5G17700	2.11507	1.43937e-19
AT1G62380	1.70524	1.15323e-48	AT1G62370	-2.90958	7.91577e-23
AT5G52240	-0.637552	3.24531e-09	AT5G52230	0.456284	3.25155e-05
AT3G55150	-4.85682	9.22902e-34	AT3G55140	0.680702	9.58566e-12
AT4G23760	-0.293392	0.0156751	AT4G23740	1.17008	2.26327e-28
AT2G32860	5.43133	3.50205e-69	AT2G32850	-0.367552	0.0164482
AT2G01900	-3.92635	1.10627e-18	AT2G01880	-5.84732	3.62555e-22
AT3G62280	-4.26019	4.4763e-29	AT3G62270	-4.3696	5.59175e-60
AT3G61270	-5.83985	1.8546e-58	AT3G61260	1.01593	0.000154554
AT2G02690	-6.81747	3.18635e-16	AT2G02680	-3.72501	2.22769e-25
AT1G54000	-5.58652	2.25931e-43	AT1G53990	-5.66366	5.40753e-47
AT3G49830	-1.66386	2.20973e-05	AT3G49820	-2.13351	2.58268e-06
AT4G21610	-0.681154	0.000114895	AT4G21600	-4.63867	1.85451e-28
AT3G03530	-2.80443	4.8316e-23	AT3G03520	-2.6699	2.34366e-14
AT4G18430	-5.52495	1.04228e-40	AT4G18425	-2.38896	4.47002e-11
AT4G04830	-2.32426	1.70661e-12	AT4G04810	-1.62552	4.90322e-06
AT3G55160	-0.555484	0.0488099	AT3G55150	-4.85682	9.22902e-34
AT4G14490	0.507844	0.0086926	AT4G14480	6.84256	4.24128e-84
AT2G39550	-0.564106	1.10627e-09	AT2G39530	-5.60022	2.98983e-44
AT1G49475	-2.49528	5.30931e-06	AT1G49470	-1.72262	1.03562e-12
AT3G21800	-5.42159	2.45598e-06	AT3G21790	4.85916	2.38903e-84
AT3G16450	-3.26201	9.57923e-16	AT3G16410	-4.06211	3.80505e-40
AT1G66340	-0.30685	0.0072418	AT1G66330	2.51672	3.31832e-44
AT1G18150	-0.320004	0.0117015	AT1G18140	-3.57713	1.79708e-09
AT1G19330	0.957246	0.000139679	AT1G19290	-0.311764	0.0373556
AT5G06490	-4.52098	5.41027e-09	AT5G06460	-0.23493	0.0175622
AT1G47603	-3.92928	4.4667e-07	AT1G47600	-5.95029	9.38975e-17
AT1G08520	3.60859	1.63221e-165	AT1G08510	0.410402	1.85157e-06
AT2G35270	-5.64719	7.83901e-34	AT2G35260	5.77801	9.99351e-223
AT2G43500	1.15731	0.000711335	AT2G43490	-0.716703	0.0014061
AT3G21090	1.7294	0.000194314	AT3G21080	3.89912	1.53848e-07
AT1G07570	1.9571	7.26395e-43	AT1G07560	-5.55188	1.17987e-20
AT4G37520	-1.67733	3.35842e-06	AT4G37510	3.34892	1.34872e-186
AT5G64700	-1.19182	4.61778e-09	AT5G64690	-2.59869	1.60522e-14
AT4G03010	0.8437	2.78677e-07	AT4G03000	0.542089	9.28973e-05
AT2G26420	-4.92489	2.63272e-25	AT2G26410	-5.52542	6.56274e-21
AT4G10380	-3.89752	3.61603e-83	AT4G10370	-5.678	4.24588e-33
AT3G21560	1.20041	0.000124591	AT3G21550	-1.34361	1.45833e-05
AT5G51930	-5.30196	5.98013e-14	AT5G51920	-1.7658	3.9118e-11
AT4G14455	-0.684852	6.86127e-09	AT4G14440	0.808882	0.000316986
AT1G71940	-0.959843	5.07852e-11	AT1G71930	-1.02949	2.38867e-05
AT1G29030	-0.579994	1.61037e-05	AT1G29025	-5.44124	2.33656e-51
AT3G04560	-0.697975	1.44429e-09	AT3G04520	0.958505	0.0118971
AT2G32870	8.4884	2.65907e-123	AT2G32860	5.43133	3.50205e-69
AT5G01075	3.74073	1.22985e-56	AT5G01050	-5.2687	9.29581e-49
AT4G17800	-5.11432	4.80907e-32	AT4G17790	-0.903567	1.57404e-22
AT2G31190	1.37758	3.13929e-16	AT2G31180	-3.58299	2.2071e-13
AT2G32870	8.4884	2.65907e-123	AT2G32860	5.43133	3.50205e-69
AT3G04570	-5.44179	1.98756e-40	AT3G04560	-0.697975	1.44429e-09
AT5G22300	2.25654	4.54899e-06	AT5G22290	0.768713	7.80749e-07
AT1G10410	-1.03174	1.82694e-22	AT1G10400	-4.32582	2.18032e-10
AT1G53645	-0.685759	0.00173742	AT1G53640	-5.65486	6.1404e-15
AT3G49370	-1.56445	3.816e-24	AT3G49360	0.449307	0.0112477
AT1G51870	-4.99841	6.17323e-13	AT1G51860	-3.94709	1.17391e-46
AT4G09030	-2.02285	8.42362e-05	AT4G09020	0.411621	0.0225313
AT4G14770	1.33264	1.10482e-08	AT4G14760	-0.480405	0.0127951
AT4G26270	-0.697717	0.00188198	AT4G26260	4.27207	5.07665e-06
AT3G54960	-2.58269	6.64961e-38	AT3G54950	-1.84765	3.44477e-25
AT3G18400	-4.59315	1.53035e-43	AT3G18390	3.48032	1.20334e-83
AT5G12860	2.3378	9.67343e-46	AT5G12850	0.267902	0.00169637
AT5G59710	0.353864	0.000306372	AT5G59700	-1.92702	4.53608e-11
AT3G49390	-0.739972	4.25522e-19	AT3G49380	-3.306	5.75461e-07
AT5G59560	-0.479326	0.000125187	AT5G59530	-5.43815	1.02657e-32
AT2G39855	6.30833	6.90852e-10	AT2G39850	6.7857	1.41655e-36
AT3G20640	-1.45418	3.70523e-15	AT3G20630	-0.302548	0.00113508
AT2G30350	1.01455	5.64383e-06	AT2G30340	-5.10924	8.50866e-23
AT3G47050	-6.42586	8.52905e-17	AT3G47040	-6.1658	1.7304e-20
AT5G01260	1.11359	0.000197644	AT5G01250	-5.07445	5.41408e-34
AT3G26100	-0.90258	1.49492e-20	AT3G26090	-0.981995	1.20555e-22
AT5G65800	-3.74074	1.06857e-12	AT5G65790	-5.16567	1.76259e-73
AT5G19110	-3.50907	2.31769e-25	AT5G19100	-3.16721	4.15308e-26
AT5G26320	-5.71275	3.49188e-13	AT5G26310	-6.22968	2.01156e-37
AT5G51600	0.861197	0.00802436	AT5G51590	-1.44341	9.30919e-17
AT5G14960	0.933093	0.0012462	AT5G14950	-0.427926	0.00207954
AT2G28260	0.663982	0.0189849	AT2G28250	-2.65565	2.84917e-43
AT5G62220	0.95387	6.03278e-05	AT5G62210	2.13984	0.00341354
AT4G21610	-0.681154	0.000114895	AT4G21590	-1.82197	0.000221726
AT4G14920	0.460236	0.00692875	AT4G14900	-0.308519	0.0178454
AT3G56320	-1.23701	1.46763e-10	AT3G56300	1.38927	0.0022857
AT5G11230	-3.47622	2.59521e-75	AT5G11210	-3.93886	9.24166e-26
AT4G23700	-4.31437	2.38626e-47	AT4G23680	-1.55766	0.0199095
AT4G33980	-1.77005	6.81868e-06	AT4G33970	-0.867294	0.0353676
AT1G64060	-2.72482	2.94618e-33	AT1G64050	0.373555	0.0288879
AT1G11450	-2.66037	7.26953e-29	AT1G11440	0.418061	0.0136475
AT2G47560	-1.39307	0.00179676	AT2G47550	-3.87504	7.42969e-16
AT1G30420	-2.00563	2.07427e-14	AT1G30410	0.855141	0.00415611
AT2G16980	-5.23475	1.82169e-40	AT2G16970	-6.11387	1.26985e-31
AT5G35770	-2.95434	9.57571e-08	AT5G35760	-1.08166	0.0172336
AT4G33980	-1.77005	6.81868e-06	AT4G33970	-0.867294	0.0353676
AT2G05330	-4.29518	1.01242e-10	AT2G05320	-1.09417	0.000394632
AT5G51780	-3.34564	2.72403e-07	AT5G51770	-1.02528	8.27567e-10
AT5G12340	-5.05852	8.4222e-15	AT5G12330	-3.10759	5.92726e-08
AT5G52040	0.413672	0.0015224	AT5G52030	1.23671	1.97078e-08
AT3G16400	-1.46013	0.00197838	AT3G16390	-3.57997	2.43644e-18
AT4G37530	-1.57687	8.12699e-12	AT4G37520	-1.67733	3.35842e-06
AT2G32870	8.4884	2.65907e-123	AT2G32860	5.43133	3.50205e-69
AT5G11110	-1.94962	1.25488e-32	AT5G11100	-1.42076	9.05481e-13
AT3G14270	-0.485713	1.21926e-08	AT3G14260	-6.66424	1.27266e-28
AT1G61380	1.81415	1.03066e-08	AT1G61370	-1.93289	4.39052e-13
AT5G18560	-4.9509	1.457e-14	AT5G18550	0.90024	1.8471e-12
AT3G52490	-2.2072	9.88396e-17	AT3G52430	-1.24613	0.00428411
AT1G56145	-2.0826	3.20206e-52	AT1G56140	-1.6764	5.69278e-38
AT1G73640	-1.73659	4.77503e-09	AT1G73620	-1.69815	1.06155e-05
AT1G19230	-3.84501	4.03149e-72	AT1G19220	-0.39227	0.0370475
AT2G44460	4.73021	9.40703e-08	AT2G44450	-2.51447	1.58371e-50
AT2G15240	-0.427465	0.0215915	AT2G15230	-0.636324	0.0406048
AT5G51510	-0.596873	7.69547e-07	AT5G51500	-5.67932	6.13098e-14
AT4G23460	-0.258138	0.0173832	AT4G23420	-3.36991	1.53149e-23
AT1G26700	-5.30639	9.16576e-27	AT1G26690	-0.753996	0.00315472
AT1G56710	3.64963	7.07784e-05	AT1G56690	-0.563988	0.0334421
AT4G14980	-4.77159	3.916e-11	AT4G14970	0.873577	0.0126145
AT5G15130	-5.20235	5.82664e-41	AT5G15120	-2.81949	0.000134818
AT1G78820	7.243	6.03132e-262	AT1G78815	-3.36181	1.89731e-17
AT5G24100	-5.81338	1.48697e-61	AT5G24090	-5.03774	4.224e-40
AT5G66870	-4.69856	7.81976e-69	AT5G66850	0.366944	0.000245217
AT2G40475	1.35422	1.54308e-25	AT2G40470	-2.94977	3.55782e-18
AT4G20240	-3.87189	8.99156e-73	AT4G20230	-2.6083	1.37776e-21
AT5G13920	1.5924	7.12511e-12	AT5G13910	-5.0649	2.83614e-52
AT1G12040	-5.94267	8.40602e-54	AT1G12030	5.19074	1.98522e-26
AT2G38720	2.01762	2.05628e-10	AT2G38710	-0.636233	1.03893e-08
AT4G23010	-0.416532	4.20321e-05	AT4G23000	1.41827	1.06641e-05
AT3G46700	-4.78572	2.28174e-12	AT3G46690	-2.46995	4.13356e-11
AT1G65860	4.40194	6.1408e-123	AT1G65850	-3.47514	2.95834e-08
AT3G08500	-0.766168	0.0384742	AT3G08490	-2.59916	1.86483e-12
AT1G23200	3.55593	4.02485e-36	AT1G23190	-0.479034	1.70778e-06
AT1G12010	-3.12336	3.46292e-46	AT1G12000	-1.03589	1.28771e-07
AT1G55590	-0.282475	0.0035953	AT1G55580	-3.65586	7.77289e-21
AT3G25800	-0.366881	0.00540516	AT3G25790	-4.1026	6.36464e-31
AT5G11540	-2.96172	2.25872e-07	AT5G11530	0.341802	0.00647053
AT3G11430	-5.20831	6.8997e-35	AT3G11420	-1.60234	2.28202e-12
AT1G16310	-1.93327	2.01649e-21	AT1G16300	-1.83896	9.80412e-18
AT1G52060	-5.14933	2.39863e-13	AT1G52050	-5.23971	1.08553e-22
AT4G19720	-5.76276	8.54639e-27	AT4G19710	1.04694	6.06793e-08
AT3G04580	-0.845094	5.01692e-25	AT3G04570	-5.44179	1.98756e-40
AT4G18440	1.35581	6.57153e-06	AT4G18425	-2.38896	4.47002e-11
AT5G42520	0.292093	0.00334519	AT5G42510	-5.96483	2.49728e-23
AT1G80830	-3.55151	3.01489e-63	AT1G80820	-3.46808	7.84468e-27
AT4G01140	-3.81479	1.95107e-15	AT4G01130	7.13048	3.99402e-102
AT4G24080	-1.99276	1.18576e-10	AT4G24060	-0.783742	7.51902e-18
AT1G03840	-4.37555	2.39555e-50	AT1G03820	-1.84755	9.70631e-07
AT2G01540	-1.40978	4.23749e-06	AT2G01530	-5.87797	4.19703e-27
AT4G20460	-3.44949	6.77887e-68	AT4G20450	-2.66529	4.74304e-08
AT1G54460	-0.269218	0.0262179	AT1G54450	-1.11861	5.19406e-05
AT5G45380	-2.63683	7.01141e-82	AT5G45370	-0.588268	2.19988e-05
AT5G04740	-0.978949	3.63779e-18	AT5G04720	-0.394925	0.0260981
AT5G18780	-2.60223	2.38526e-26	AT5G18770	0.517433	0.00078849
AT3G23160	-1.24094	2.21952e-24	AT3G23150	-2.01035	3.14954e-05
AT4G26270	-0.697717	0.00188198	AT4G26255	5.12052	9.94427e-12
AT3G21230	-1.88253	3.76208e-21	AT3G21220	-0.28191	0.0011369
AT1G06090	-3.74301	1.32927e-35	AT1G06080	1.2652	0.0013778
AT1G27680	0.914654	3.29408e-05	AT1G27660	-0.573323	2.63718e-05
AT4G22110	-4.53091	2.45103e-10	AT4G22080	-5.80722	5.47367e-28
AT3G23430	-3.75841	5.00861e-78	AT3G23410	2.82235	4.25089e-102
AT2G23530	-0.906404	0.00023645	AT2G23520	0.222139	0.0305301
AT4G12270	-4.74404	6.11322e-14	AT4G12250	-0.650448	0.0263177
AT3G62280	-4.26019	4.4763e-29	AT3G62270	-4.3696	5.59175e-60
AT1G29000	-4.30952	4.97049e-16	AT1G28960	-0.401687	0.0435339
AT1G51880	-5.75359	8.00642e-38	AT1G51860	-3.94709	1.17391e-46
AT1G17750	-2.40975	5.26011e-09	AT1G17745	-3.40757	3.27074e-21
AT1G79190	-0.284077	0.0161981	AT1G79180	-3.29163	4.21897e-15
AT3G02240	-3.43648	3.12227e-26	AT3G02230	-2.05964	9.47748e-66
AT1G60140	-0.604395	0.0132412	AT1G60130	-1.50091	0.00109978
AT3G09270	-4.29387	8.52294e-86	AT3G09240	-4.39272	5.87859e-27
AT5G16900	-5.96416	2.92687e-32	AT5G16890	-0.27367	0.0194181
AT5G65800	-3.74074	1.06857e-12	AT5G65790	-5.16567	1.76259e-73
AT5G54050	-5.60894	8.33764e-11	AT5G54030	-5.4025	8.8408e-15
AT4G35390	-4.28803	1.81072e-50	AT4G35380	-4.7898	3.28502e-89
AT4G12040	-0.783311	0.00137796	AT4G12020	-0.628552	1.66787e-08
AT5G20890	-0.452164	3.93173e-05	AT5G20885	-1.1136	3.73665e-07
AT1G49320	-1.72135	2.39107e-08	AT1G49310	-4.80523	3.56377e-34
AT5G20980	0.722929	6.84388e-05	AT5G20960	-3.299	4.89489e-82
AT4G15280	-2.99188	2.81384e-07	AT4G15270	-5.16433	1.30028e-20
AT1G26945	2.16823	3.89198e-25	AT1G26940	-0.813956	5.60026e-07
AT4G37650	-0.957016	1.59011e-05	AT4G37640	-0.893682	2.21729e-16
AT1G52420	-0.917887	4.06258e-15	AT1G52410	3.16271	3.07824e-06
AT2G39050	-2.22985	1.44696e-05	AT2G39040	-5.94043	1.70033e-37
AT3G16390	-3.57997	2.43644e-18	AT3G16370	4.4498	7.78718e-40
AT1G58300	7.67439	3.42531e-07	AT1G58290	3.2323	1.622e-106
AT2G46410	-1.18102	1.16894e-05	AT2G46380	2.24083	2.7405e-11
AT3G50790	2.33258	5.9757e-41	AT3G50760	-0.855254	0.0305221
AT2G16900	-0.825974	0.00348463	AT2G16890	-2.00091	6.68449e-06
AT4G20235	-4.42468	1.7986e-16	AT4G20230	-2.6083	1.37776e-21
AT1G34430	1.12001	4.66065e-23	AT1G34420	-3.07253	3.66099e-22
AT4G25410	-2.6638	5.58492e-10	AT4G25400	-5.74654	2.8521e-26
AT1G67865	4.09425	9.60507e-37	AT1G67860	8.17116	4.78048e-52
AT1G08820	-0.594241	0.00206456	AT1G08760	-0.294392	0.0295138
AT3G57810	1.40968	3.15679e-32	AT3G57780	1.57301	9.42253e-12
AT5G63680	-1.03469	1.624e-11	AT5G63670	0.63515	0.000140187
AT5G59340	3.53951	1.54432e-16	AT5G59330	7.52901	2.65415e-11
AT3G09250	2.34971	6.64504e-53	AT3G09220	-5.99718	8.21899e-23
AT1G73580	-5.52389	8.54244e-26	AT1G73570	1.46631	4.72425e-09
AT1G14250	7.67331	7.83181e-50	AT1G14230	-0.814159	5.4317e-10
AT5G64120	-2.56657	1.53594e-11	AT5G64100	-4.9992	4.65088e-45
AT1G58410	-2.73487	1.21556e-19	AT1G58400	-2.8033	4.3406e-08
AT1G29025	-5.44124	2.33656e-51	AT1G29020	-4.00075	1.30636e-40
AT2G44460	4.73021	9.40703e-08	AT2G44450	-2.51447	1.58371e-50
AT2G39855	6.30833	6.90852e-10	AT2G39850	6.7857	1.41655e-36
AT4G20890	-0.755243	0.000621818	AT4G20870	0.575796	2.96349e-06
AT4G30190	-2.95338	2.66475e-24	AT4G30170	-5.06997	1.12934e-88
AT2G38110	-1.24026	0.0010289	AT2G38090	-1.46731	1.8541e-08
AT3G51580	-0.669691	4.38586e-06	AT3G51570	-4.29046	1.02785e-06
AT2G23410	-6.36368	5.41647e-19	AT2G23400	-6.21935	8.29998e-13
AT2G34730	-0.650358	5.88825e-10	AT2G34720	1.00212	7.93914e-06
AT5G64110	3.33692	4.46465e-83	AT5G64100	-4.9992	4.65088e-45
AT5G06340	1.61119	4.28412e-37	AT5G06330	-4.55981	6.24182e-39
AT1G64940	-2.65618	1.84335e-06	AT1G64920	-6.31698	8.50226e-47
AT1G52160	-0.674356	0.000108221	AT1G52155	-1.04026	2.38749e-14
AT1G26300	-0.502684	0.000157327	AT1G26270	-0.640826	6.8897e-06
AT3G21240	-2.23164	6.37151e-80	AT3G21230	-1.88253	3.76208e-21
AT2G28780	-4.45254	8.97821e-20	AT2G28760	-1.40261	5.36056e-12
AT2G45430	-5.40487	6.69659e-56	AT2G45420	-2.78096	7.20867e-08
AT1G64440	-0.853436	7.6208e-09	AT1G64430	2.90061	3.93338e-267
AT5G49800	0.505224	0.00416778	AT5G49770	-5.34104	1.27677e-56
AT3G16450	-3.26201	9.57923e-16	AT3G16410	-4.06211	3.80505e-40
AT3G60720	-1.06603	0.00327739	AT3G60700	-1.9755	0.00202671
AT5G10230	-5.04152	3.07811e-33	AT5G10200	-0.38599	0.000154729
AT1G64900	3.96602	4.54942e-51	AT1G64890	-1.04223	0.000866905
AT2G28760	-1.40261	5.36056e-12	AT2G28755	-2.20857	0.000627199
AT1G31772	-5.05534	2.44938e-10	AT1G31770	-3.04001	1.3428e-38
AT5G65600	-1.68558	0.0197692	AT5G65590	4.82218	1.35737e-56
AT1G69830	2.29593	1.72663e-45	AT1G69810	-4.50118	8.24811e-96
AT1G30420	-2.00563	2.07427e-14	AT1G30410	0.855141	0.00415611
AT1G20850	-0.941201	0.000739273	AT1G20840	-1.97221	1.23909e-12
AT5G51930	-5.30196	5.98013e-14	AT5G51920	-1.7658	3.9118e-11
AT1G27180	-1.35096	1.11488e-22	AT1G27170	-2.12581	2.31837e-26
AT2G30220	-6.39933	3.69335e-08	AT2G30210	-4.80122	2.38441e-22
AT5G51780	-3.34564	2.72403e-07	AT5G51770	-1.02528	8.27567e-10
AT1G29030	-0.579994	1.61037e-05	AT1G29020	-4.00075	1.30636e-40
AT1G52060	-5.14933	2.39863e-13	AT1G52050	-5.23971	1.08553e-22
AT5G45540	2.27524	5.26999e-08	AT5G45510	-1.40689	2.38378e-23
AT4G18440	1.35581	6.57153e-06	AT4G18430	-5.52495	1.04228e-40
AT4G37520	-1.67733	3.35842e-06	AT4G37510	3.34892	1.34872e-186
AT1G14240	-4.23284	2.31321e-22	AT1G14220	-4.94101	9.2834e-16
AT4G15290	-6.24561	2.76336e-30	AT4G15270	-5.16433	1.30028e-20
AT4G33150	-1.36156	1.57179e-11	AT4G33140	-0.707984	0.00110232
AT5G23030	-5.40231	3.04129e-22	AT5G23020	-1.93041	5.24465e-06
AT5G38540	-6.98797	5.00214e-15	AT5G38530	-0.940978	7.48233e-18
AT3G52880	0.617689	2.29573e-20	AT3G52850	-0.438923	6.61548e-06
AT1G51860	-3.94709	1.17391e-46	AT1G51850	-2.49075	7.10243e-09
AT4G22080	-5.80722	5.47367e-28	AT4G22070	-4.95157	8.85151e-26
AT2G25737	0.554989	0.000616636	AT2G25730	-0.499285	3.97673e-05
AT5G17460	-1.99988	8.11683e-51	AT5G17430	-4.71095	1.51235e-24
AT3G50070	-0.331163	0.0302629	AT3G50060	2.8905	8.91083e-33
AT1G26460	-0.389982	0.0027132	AT1G26450	-1.09739	1.16737e-08
AT2G20080	-6.56655	5.50771e-22	AT2G20050	0.923022	5.10253e-13
AT3G16050	-1.04551	0.00011516	AT3G16030	-0.977337	0.00155457
AT5G49780	-3.87018	1.65165e-31	AT5G49770	-5.34104	1.27677e-56
AT3G09405	-1.03316	0.000674316	AT3G09400	-4.44355	9.06696e-07
AT4G22720	-0.396469	0.0333649	AT4G22710	-2.60374	3.69942e-07
AT1G26450	-1.09739	1.16737e-08	AT1G26440	-1.71436	1.70716e-26
AT4G15236	3.92956	6.19506e-13	AT4G15233	0.964055	0.0216342
AT5G07780	-5.71381	5.90979e-24	AT5G07770	-1.05714	5.86956e-05
AT2G28970	-5.31659	4.18982e-130	AT2G28960	-5.37377	2.41102e-45
AT5G52910	1.27553	0.000422393	AT5G52890	2.46249	4.13355e-27
AT4G15340	-5.13487	1.16504e-40	AT4G15330	-5.65948	3.46946e-28
AT5G24260	-0.360725	0.00155863	AT5G24230	-3.3866	1.37898e-16
AT5G17460	-1.99988	8.11683e-51	AT5G17450	1.19437	0.00231068
AT2G27370	-4.99033	1.60512e-21	AT2G27360	-0.599716	0.0170287
AT2G41700	-0.20774	0.00727362	AT2G41690	-3.25349	9.77509e-10
AT3G09260	-3.32344	4.0473e-12	AT3G09250	2.34971	6.64504e-53
AT5G43040	-2.48307	6.07508e-18	AT5G43030	-4.7124	1.98551e-34
AT4G15340	-5.13487	1.16504e-40	AT4G15330	-5.65948	3.46946e-28
AT5G41290	-3.61485	5.83325e-12	AT5G41280	-5.24772	1.49266e-09
AT4G23700	-4.31437	2.38626e-47	AT4G23690	-4.07992	9.77715e-44
AT5G19540	2.11386	1.25675e-48	AT5G19530	-1.54652	0.000114523
AT4G13300	-6.1067	4.59129e-18	AT4G13290	-4.09783	6.65824e-16
AT5G24420	5.21649	2.34449e-19	AT5G24410	-6.42373	3.30873e-29
AT5G65090	-3.5715	3.75346e-30	AT5G65080	0.976695	0.000654834
AT3G16410	-4.06211	3.80505e-40	AT3G16400	-1.46013	0.00197838
AT3G05327	1.15586	0.0450456	AT3G05290	-0.364796	0.00724515
AT1G63000	-1.83512	6.48629e-23	AT1G62990	-2.88685	7.26953e-29
AT2G31190	1.37758	3.13929e-16	AT2G31180	-3.58299	2.2071e-13
AT5G13430	-0.824469	2.33847e-15	AT5G13420	-1.82347	1.71593e-33
AT1G10310	1.35324	2.99631e-13	AT1G10300	-3.86949	2.45384e-10
AT1G11080	1.62374	7.34496e-10	AT1G11070	-0.979147	0.00278702
AT1G67760	-3.30064	2.84093e-10	AT1G67750	-1.0531	6.64884e-05
AT4G04460	-1.80422	2.69612e-13	AT4G04450	-1.29939	2.92644e-07
AT1G54460	-0.269218	0.0262179	AT1G54450	-1.11861	5.19406e-05
AT1G11080	1.62374	7.34496e-10	AT1G11070	-0.979147	0.00278702
AT3G16340	-2.47987	1.37364e-57	AT3G16320	-0.859408	0.000125187
AT4G14465	-3.11314	3.22212e-56	AT4G14450	2.8059	1.40676e-09
AT4G33460	1.45404	6.24649e-28	AT4G33440	-0.794436	3.87389e-05
AT3G46740	1.26191	1.10869e-71	AT3G46720	-4.81111	2.8434e-46
AT3G16340	-2.47987	1.37364e-57	AT3G16320	-0.859408	0.000125187
AT3G11402	0.812683	0.0295388	AT3G11390	-2.11196	7.47385e-05
AT1G17600	0.989697	0.00304197	AT1G17590	-1.66098	2.45341e-15
AT5G57100	-0.589593	0.000894716	AT5G57090	-4.69481	8.38865e-23
AT5G64300	0.500138	0.000949923	AT5G64290	1.39656	6.66641e-75
AT5G49780	-3.87018	1.65165e-31	AT5G49770	-5.34104	1.27677e-56
AT1G12260	-1.26319	3.14445e-09	AT1G12250	3.99687	5.31649e-63
AT1G73150	-0.408167	0.00411256	AT1G73130	-1.18079	8.34416e-09
AT1G28090	0.430167	0.00270282	AT1G28080	-2.77461	9.0745e-20
AT3G50200	-2.65113	3.50789e-13	AT3G50190	-1.99317	5.78594e-07
AT1G60030	-0.850004	0.000470154	AT1G59990	1.82884	3.48749e-33
AT1G79710	-0.749159	0.000194239	AT1G79690	-0.46403	2.52578e-07
AT4G22745	0.905702	0.00280583	AT4G22740	0.416829	4.37259e-05
AT2G43850	-0.676514	1.65655e-06	AT2G43840	-1.44927	1.12566e-06
AT1G73860	-3.81201	1.94632e-28	AT1G73850	-1.07259	3.03704e-17
AT3G19390	-3.9182	5.3202e-17	AT3G19370	-1.99286	1.47869e-111
AT1G34040	-4.95364	1.2524e-38	AT1G34030	-0.303631	1.54186e-05
AT5G25110	-3.76888	1.28642e-57	AT5G25100	-0.257566	0.0274887
AT5G43930	-0.255475	0.0214551	AT5G43910	-1.80741	2.22621e-14
AT5G13440	-0.784964	0.000184138	AT5G13430	-0.824469	2.33847e-15
AT5G08370	2.24303	1.22504e-41	AT5G08360	-1.05926	0.00135512
AT4G16620	-1.58425	4.3834e-08	AT4G16610	-2.58434	1.94741e-11
AT5G38360	1.69723	1.33023e-35	AT5G38340	-3.27134	2.50843e-79
AT5G48400	-3.12326	7.02204e-07	AT5G48385	-0.251559	0.00839183
AT3G04070	-1.92025	1.27688e-07	AT3G04060	-2.996	9.56971e-14
AT4G37380	1.11136	7.77867e-06	AT4G37370	1.77299	5.00124e-05
AT2G25940	-3.24222	3.60757e-49	AT2G25930	-0.47526	0.00088585
AT1G51500	4.14053	6.59633e-180	AT1G51480	-6.29453	3.19735e-11
AT3G18990	-0.674869	4.34521e-07	AT3G18980	1.44324	1.34732e-11
AT4G12060	2.23505	1.7308e-63	AT4G12050	-5.58783	6.00496e-39
AT4G21600	-4.63867	1.85451e-28	AT4G21590	-1.82197	0.000221726
AT4G39950	-2.21337	1.09048e-15	AT4G39940	0.719331	0.0111521
AT1G78380	-0.608156	0.00376162	AT1G78360	-3.90843	1.01823e-13
AT5G48960	0.928093	1.2295e-15	AT5G48940	-4.86915	1.38229e-25
AT4G29700	-2.86228	1.3637e-11	AT4G29690	-5.70938	7.92723e-31
AT5G50410	0.385172	0.0436639	AT5G50400	-0.766225	3.48309e-06
AT1G61820	-3.01395	1.96512e-28	AT1G61810	-2.20305	6.01289e-34
AT5G52270	-1.9881	1.49537e-05	AT5G52250	1.20361	3.50632e-05
AT3G22840	-1.46425	0.026405	AT3G22830	-4.17564	2.66735e-14
AT5G66630	-2.42092	2.09763e-07	AT5G66620	-1.65175	3.42084e-08
AT1G77520	-5.28121	3.09873e-17	AT1G77510	-0.78643	7.09903e-08
AT5G48410	-3.84878	1.06568e-18	AT5G48400	-3.12326	7.02204e-07
AT2G21850	-3.82975	8.23224e-52	AT2G21840	-4.9492	6.84443e-73
AT5G06240	0.408093	0.00991761	AT5G06230	-3.08762	1.14702e-19
AT1G22440	-5.47066	1.85608e-30	AT1G22430	2.77395	2.09902e-46
AT1G57600	-0.523021	2.34009e-05	AT1G57590	-3.90101	1.87617e-07
AT1G61370	-1.93289	4.39052e-13	AT1G61360	-1.8002	4.21621e-07
AT1G52060	-5.14933	2.39863e-13	AT1G52050	-5.23971	1.08553e-22
AT5G49800	0.505224	0.00416778	AT5G49780	-3.87018	1.65165e-31
AT2G18050	-1.89215	0.00465923	AT2G18040	-0.497563	1.57924e-07
AT1G51850	-2.49075	7.10243e-09	AT1G51830	-5.56695	4.51837e-59
AT4G35040	-1.18429	3.54071e-09	AT4G35030	-2.42641	2.02879e-11
AT3G10710	-5.83048	1.00337e-35	AT3G10700	0.394179	0.0101894
AT4G15330	-5.65948	3.46946e-28	AT4G15280	-2.99188	2.81384e-07
AT1G53633	-2.9836	3.96604e-07	AT1G53625	-2.72432	1.3248e-05
AT4G17840	2.33873	2.90555e-17	AT4G17790	-0.903567	1.57404e-22
AT5G04970	-5.86886	2.23497e-22	AT5G04960	-5.82168	2.45885e-28
AT1G64180	0.486553	0.000643325	AT1G64170	-1.33848	0.00340945
AT2G41660	-5.10929	1.61398e-42	AT2G41650	-0.508324	0.0399642
AT2G25980	-5.3639	3.03704e-17	AT2G25970	0.243787	0.0162658
AT2G45240	-0.28665	0.000917631	AT2G45220	-3.87217	3.92521e-60
AT4G15400	-5.75454	3.78426e-30	AT4G15330	-5.65948	3.46946e-28
AT4G33720	-5.3588	4.71292e-16	AT4G33700	-0.58236	3.15035e-07
AT5G54830	-0.744323	3.82854e-05	AT5G54800	-1.59998	1.62014e-53
AT4G14630	-5.66944	3.41771e-19	AT4G14605	1.75593	1.50506e-21
AT2G32970	0.61179	0.00234307	AT2G32960	-1.01007	5.77958e-11
AT3G49970	7.56746	4.13483e-12	AT3G49950	4.56924	3.17613e-14
AT2G27590	-0.619678	5.37535e-05	AT2G27550	-5.14188	7.9065e-131
AT2G33790	-6.01612	2.00087e-31	AT2G33770	-1.03288	0.00023318
AT2G20000	0.325994	0.0363003	AT2G19990	-1.38795	0.00034833
AT1G54460	-0.269218	0.0262179	AT1G54450	-1.11861	5.19406e-05
AT5G40240	-0.989175	3.21734e-06	AT5G40230	-3.39548	2.92911e-38
AT5G49290	-0.873398	3.97506e-05	AT5G49270	-5.69228	1.2601e-77
AT5G20870	-0.853681	0.0294228	AT5G20860	-4.65968	7.90938e-16
AT1G14180	0.701289	3.24252e-05	AT1G14170	-1.68784	2.20727e-08
AT3G19900	1.56441	2.89324e-13	AT3G19895	-0.512797	2.93759e-05
AT3G53840	-0.986038	0.047096	AT3G53830	2.65942	1.02801e-12
AT4G01850	-0.778154	4.05923e-12	AT4G01840	0.633027	5.67067e-05
AT1G13750	-1.02691	8.34503e-14	AT1G13710	2.09062	1.61342e-12
AT5G48100	-5.19492	3.79857e-13	AT5G48090	-2.02344	6.82064e-06
AT5G33300	-0.938383	0.00376191	AT5G33290	-1.5993	6.06485e-10
AT1G61760	-1.06278	0.000675469	AT1G61750	-5.49538	1.03123e-14
AT2G30150	1.89265	7.83054e-43	AT2G30130	-5.33588	2.87498e-09
AT5G62440	-0.720186	1.44548e-05	AT5G62420	-3.98787	1.35186e-10
AT1G66450	-3.47082	2.41311e-24	AT1G66440	-6.15921	2.6948e-22
AT1G67870	0.708949	0.00969354	AT1G67865	4.09425	9.60507e-37
AT1G61490	-0.578744	0.0422436	AT1G61480	-5.67911	9.54535e-37
AT2G26420	-4.92489	2.63272e-25	AT2G26410	-5.52542	6.56274e-21
AT2G04800	-4.88181	1.08076e-39	AT2G04780	-1.22536	3.56312e-39
AT5G16970	2.81879	1.50446e-56	AT5G16960	3.41598	0.000890727
AT5G51670	-1.23255	4.00425e-05	AT5G51660	0.534489	0.0010155
AT2G41250	1.28774	9.1303e-06	AT2G41240	1.27927	9.05958e-07
AT3G16450	-3.26201	9.57923e-16	AT3G16390	-3.57997	2.43644e-18
AT3G46740	1.26191	1.10869e-71	AT3G46710	-5.86719	4.3776e-21
AT3G27300	-1.41767	5.33082e-25	AT3G27290	-1.7991	4.63548e-08
AT3G09250	2.34971	6.64504e-53	AT3G09230	-0.569972	0.000135407
AT1G07650	1.45981	8.55221e-14	AT1G07630	-0.557545	0.00129468
AT4G22120	-0.858086	6.50656e-10	AT4G22080	-5.80722	5.47367e-28
AT2G43900	1.48229	6.83087e-11	AT2G43880	-5.59007	3.69557e-38
AT5G15130	-5.20235	5.82664e-41	AT5G15120	-2.81949	0.000134818
AT1G51850	-2.49075	7.10243e-09	AT1G51840	-4.47906	4.10693e-81
AT2G32880	7.77776	1.69897e-110	AT2G32860	5.43133	3.50205e-69
AT4G14070	2.81232	6.17859e-151	AT4G14060	-5.83609	1.7652e-65
AT4G33450	-5.78802	1.94312e-21	AT4G33440	-0.794436	3.87389e-05
AT3G04090	-0.412879	0.0235058	AT3G04080	-0.840832	1.40902e-12
AT1G51500	4.14053	6.59633e-180	AT1G51480	-6.29453	3.19735e-11
AT3G49970	7.56746	4.13483e-12	AT3G49960	-5.19483	1.12157e-20
AT1G31070	-1.03906	4.82905e-11	AT1G31050	-5.28585	1.38732e-128
AT3G16440	-5.85006	5.97478e-31	AT3G16410	-4.06211	3.80505e-40
AT1G73290	-4.6539	1.37363e-22	AT1G73270	-5.28286	1.93572e-73
AT4G13310	-5.84363	7.15378e-18	AT4G13290	-4.09783	6.65824e-16
AT2G02690	-6.81747	3.18635e-16	AT2G02680	-3.72501	2.22769e-25
AT1G68150	-4.7276	4.34476e-78	AT1G68140	-0.537258	5.25844e-06
AT5G48400	-3.12326	7.02204e-07	AT5G48385	-0.251559	0.00839183
AT2G39370	-4.20192	2.68218e-32	AT2G39360	-0.510543	0.0319809
AT4G23590	-5.61502	8.34142e-22	AT4G23570	1.57992	5.78119e-11
AT1G29030	-0.579994	1.61037e-05	AT1G29025	-5.44124	2.33656e-51
AT3G62970	0.537695	0.000152409	AT3G62950	5.08974	8.0751e-41
AT1G10220	-2.19547	0.000620809	AT1G10210	-0.86394	0.00148875
AT4G15670	7.10002	2.4552e-29	AT4G15660	6.15565	4.58939e-30
AT1G24420	-4.73168	9.47254e-13	AT1G24400	5.83633	1.09483e-61
AT1G26690	-0.753996	0.00315472	AT1G26680	-3.41419	2.44391e-26
AT3G47740	-5.63629	6.1072e-13	AT3G47730	-1.83988	9.76946e-12
AT5G13550	-0.661147	0.00150515	AT5G13530	-0.300733	0.00363646
AT3G21070	-0.803047	0.00162203	AT3G21060	1.02909	4.15187e-07
AT1G18860	-4.41506	9.76411e-47	AT1G18850	-0.665102	1.57287e-06
AT5G16780	0.302178	0.00663242	AT5G16770	-4.74553	4.24712e-11
AT5G47050	-2.36004	4.37753e-11	AT5G47020	0.168421	0.0270197
AT4G20310	1.00702	4.83075e-11	AT4G20300	-0.558241	8.70633e-11
AT1G29030	-0.579994	1.61037e-05	AT1G29025	-5.44124	2.33656e-51
AT2G29140	-0.361617	0.0210432	AT2G29130	-3.53502	1.71515e-11
AT3G20370	-2.23684	4.73184e-06	AT3G20350	1.29316	1.18405e-07
AT1G08620	-0.432061	0.00314227	AT1G08600	-0.454219	0.00095206
AT3G59890	-0.438099	0.0441826	AT3G59850	-5.53419	8.84604e-47
AT4G30190	-2.95338	2.66475e-24	AT4G30170	-5.06997	1.12934e-88
AT1G66470	-5.16916	2.74267e-22	AT1G66430	2.63307	3.57642e-152
AT5G07290	0.294742	0.0300762	AT5G07280	3.03422	1.3177e-18
AT4G22720	-0.396469	0.0333649	AT4G22680	-1.79819	0.000999821
AT2G30370	1.42731	3.75559e-06	AT2G30340	-5.10924	8.50866e-23
AT3G46450	0.294795	0.0171865	AT3G46440	-1.9968	1.555e-158
AT2G23770	-0.851095	0.0399919	AT2G23740	0.541463	0.00752333
AT1G73860	-3.81201	1.94632e-28	AT1G73850	-1.07259	3.03704e-17
AT1G73980	0.249538	0.027691	AT1G73960	0.47446	0.00967165
AT2G43945	2.72903	2.41486e-53	AT2G43900	1.48229	6.83087e-11
AT3G56760	-0.226904	0.0209381	AT3G56740	-0.692981	1.52348e-08
AT1G68620	-2.88676	4.2541e-07	AT1G68600	5.5984	9.72967e-51
AT5G49780	-3.87018	1.65165e-31	AT5G49770	-5.34104	1.27677e-56
AT4G37910	-0.552541	0.0112901	AT4G37900	-2.25255	2.30324e-10
AT4G19720	-5.76276	8.54639e-27	AT4G19690	-5.65376	5.04539e-09
AT1G49180	0.76339	1.70006e-05	AT1G49160	-1.45131	1.601e-15
AT1G72140	-1.8537	0.000342048	AT1G72125	-5.48726	1.04893e-37
AT1G09890	-0.406699	0.0278083	AT1G09880	-1.21453	0.00565387
AT1G19910	-0.861087	4.48117e-06	AT1G19900	-6.09442	1.70896e-49
AT3G09230	-0.569972	0.000135407	AT3G09220	-5.99718	8.21899e-23
AT5G57530	-6.10467	3.55155e-22	AT5G57500	-1.7604	1.34631e-06
AT5G49810	-0.875383	1.46525e-26	AT5G49780	-3.87018	1.65165e-31
AT1G67760	-3.30064	2.84093e-10	AT1G67730	-0.5294	0.000236509
AT4G18270	0.90133	0.000386234	AT4G18260	-2.48828	5.077e-08
AT1G01200	-2.38709	3.60883e-19	AT1G01190	-3.96761	5.2606e-30
AT4G15510	3.31837	2.84736e-73	AT4G15500	-1.96172	5.00222e-24
AT2G35020	0.50351	0.000680035	AT2G35010	-0.29815	0.0259715
AT3G60350	0.4828	4.73011e-05	AT3G60340	0.53684	0.0161809
AT4G01860	-0.66538	3.27118e-05	AT4G01850	-0.778154	4.05923e-12
AT5G11610	1.06804	1.36721e-05	AT5G11570	-3.97153	2.39788e-26
AT5G14000	-3.01672	9.63426e-28	AT5G13980	0.505659	0.00244132
AT3G60160	2.29477	7.38615e-06	AT3G60140	-2.57645	0.00222271
AT2G33793	1.18498	0.00387556	AT2G33790	-6.01612	2.00087e-31
AT3G13340	-0.348747	0.00796693	AT3G13330	-0.744413	0.000310676
AT3G22270	0.279008	0.0458906	AT3G22260	-1.05794	1.62021e-11
AT5G23190	-5.24692	1.76042e-28	AT5G23170	-1.16519	1.69619e-05
AT4G16790	-0.694754	4.53432e-05	AT4G16770	0.621352	1.91306e-05
AT3G16400	-1.46013	0.00197838	AT3G16390	-3.57997	2.43644e-18
AT1G29025	-5.44124	2.33656e-51	AT1G29020	-4.00075	1.30636e-40
AT3G57170	0.408483	7.96893e-05	AT3G57150	-0.826766	0.0308869
AT2G45750	-3.64481	4.97807e-88	AT2G45740	3.26134	9.41591e-62
AT5G56500	-1.46544	2.0089e-28	AT5G56460	-1.28643	8.58577e-06
AT2G17430	-2.62464	6.29441e-39	AT2G17410	0.385988	0.0094748
AT3G16420	-1.48348	0.00673682	AT3G16410	-4.06211	3.80505e-40
AT4G29930	-4.17208	7.11764e-28	AT4G29920	-0.607528	0.00400104
AT2G16990	-1.8623	2.48068e-12	AT2G16980	-5.23475	1.82169e-40
AT3G22600	-4.58832	6.1147e-76	AT3G22590	0.237958	0.0121024
AT2G31400	1.60583	2.02774e-72	AT2G31390	-2.99078	2.86755e-110
AT5G46900	-6.34057	5.27347e-34	AT5G46890	-6.25103	3.60126e-26
AT2G28780	-4.45254	8.97821e-20	AT2G28755	-2.20857	0.000627199
AT5G20490	-0.387083	2.81562e-07	AT5G20480	1.13341	1.17723e-10
AT1G13420	-5.35066	6.75564e-31	AT1G13410	-0.684039	0.00135153
AT5G57320	1.07989	0.00194725	AT5G57300	-0.445677	4.40898e-05
AT3G17820	-0.911256	2.81844e-08	AT3G17810	-1.51751	5.08801e-35
AT2G14620	-0.859178	0.00127406	AT2G14610	6.01671	1.1982e-05
AT4G01930	-3.06875	7.60593e-13	AT4G01925	-5.48512	9.79778e-35
AT3G13750	2.18181	2.07689e-22	AT3G13740	1.94859	6.45428e-63
AT4G18650	4.11896	3.47221e-08	AT4G18640	-1.70826	3.67656e-23
AT4G36740	-2.85114	6.31886e-15	AT4G36730	0.792037	1.52652e-06
AT3G54790	0.415809	0.00388348	AT3G54780	-1.92538	1.24412e-20
AT2G19080	-0.238562	0.0092764	AT2G19060	-6.2099	7.35033e-15
AT4G16230	-4.1642	1.80874e-10	AT4G16220	-3.78151	9.18726e-08
AT4G18610	-4.51955	4.98605e-29	AT4G18600	0.335512	0.00949269
AT1G68400	1.75675	1.58384e-23	AT1G68390	-1.92348	3.66017e-08
AT5G37510	-0.684803	6.6727e-20	AT5G37500	-1.13772	7.92158e-07
AT4G14650	-2.20846	1.10042e-18	AT4G14640	-2.6017	3.3642e-12
AT4G01510	0.717056	0.000308879	AT4G01480	-3.69911	3.69337e-47
AT4G25170	0.769392	2.09301e-07	AT4G25160	-2.41861	8.41765e-12
AT2G01440	0.769447	8.63117e-14	AT2G01430	-3.56902	3.44313e-18
AT1G66960	-3.92277	8.31384e-06	AT1G66950	-5.02397	7.42143e-14
AT1G62400	2.96225	7.29808e-37	AT1G62370	-2.90958	7.91577e-23
AT1G14230	-0.814159	5.4317e-10	AT1G14220	-4.94101	9.2834e-16
AT5G40030	-1.71475	2.54081e-07	AT5G40020	-2.78868	8.63907e-14
AT1G29280	-4.77599	3.13439e-45	AT1G29250	-0.577003	3.94829e-06
AT1G65190	4.18171	1.8231e-78	AT1G65180	-2.29343	2.00621e-30
AT5G07400	-1.06105	1.6651e-07	AT5G07390	-6.31855	5.91208e-68
AT2G19110	-2.12686	3.32291e-66	AT2G19080	-0.238562	0.0092764
AT2G45270	1.99922	1.18367e-58	AT2G45240	-0.28665	0.000917631
AT5G42630	-4.01307	1.80087e-13	AT5G42620	0.280121	0.00173022
AT3G25560	-1.22344	1.36026e-10	AT3G25530	0.823394	1.10311e-07
AT2G43690	0.589157	0.0110368	AT2G43680	-0.365056	0.0123097
AT2G32620	-6.08963	3.04854e-17	AT2G32610	-5.04225	1.39632e-14
AT1G11080	1.62374	7.34496e-10	AT1G11070	-0.979147	0.00278702
AT4G01510	0.717056	0.000308879	AT4G01480	-3.69911	3.69337e-47
AT4G19190	0.320012	0.00766985	AT4G19185	-0.828138	6.56452e-17
AT2G32270	-5.63599	1.50995e-57	AT2G32250	-0.371537	0.0283681
AT4G16620	-1.58425	4.3834e-08	AT4G16600	-4.83539	2.29809e-27
AT5G01560	0.531435	0.00413742	AT5G01550	-2.15848	0.00630771
AT4G17040	2.1991	2.29955e-211	AT4G17030	-0.848071	2.95092e-05
AT5G06850	-1.46259	1.21257e-17	AT5G06839	-5.63719	2.12728e-65
AT1G17060	-1.25518	2.73587e-06	AT1G17050	1.3197	3.08952e-12
AT1G67820	-0.716592	0.0474726	AT1G67810	-2.88276	8.40357e-10
AT3G16940	-0.347357	0.0141642	AT3G16920	-1.78589	1.77242e-05
AT3G49140	2.60196	6.84299e-180	AT3G49120	-2.54874	3.33575e-07
AT1G61840	-4.67492	3.89968e-58	AT1G61810	-2.20305	6.01289e-34
AT2G32860	5.43133	3.50205e-69	AT2G32850	-0.367552	0.0164482
AT1G74040	1.64601	1.10106e-24	AT1G74030	-1.99889	1.34435e-25
AT4G11320	-4.71419	2.35464e-17	AT4G11310	-3.72019	1.78262e-07
AT5G04470	-2.46491	2.08296e-18	AT5G04460	-0.477459	3.76213e-07
AT3G16030	-0.977337	0.00155457	AT3G16010	0.610458	0.000157789
AT2G01440	0.769447	8.63117e-14	AT2G01430	-3.56902	3.44313e-18
AT2G28270	-6.92205	1.29172e-16	AT2G28250	-2.65565	2.84917e-43
AT1G29300	-2.69048	1.03067e-10	AT1G29290	-3.19394	7.57763e-13
AT2G38800	-2.11829	1.44634e-15	AT2G38780	2.10497	9.19044e-41
AT5G58910	-5.37802	1.71062e-17	AT5G58860	-5.5143	1.4288e-37
AT2G34670	-0.668626	0.000129653	AT2G34660	-0.762732	0.0297162
AT4G35390	-4.28803	1.81072e-50	AT4G35380	-4.7898	3.28502e-89
AT2G27030	-0.301582	0.0298853	AT2G27010	-5.39978	1.35433e-28
AT5G54090	0.818383	5.89265e-05	AT5G54080	0.295369	0.0377817
AT1G54220	0.429035	0.0431477	AT1G54217	-0.814653	2.08915e-06
AT5G02590	1.12572	2.48523e-07	AT5G02560	-0.729292	0.00596425
AT3G60160	2.29477	7.38615e-06	AT3G60140	-2.57645	0.00222271
AT5G17710	1.67093	1.5027e-34	AT5G17700	2.11507	1.43937e-19
AT3G24310	-5.32194	8.45104e-20	AT3G24300	-5.43633	7.97428e-45
AT1G25460	-1.50565	0.000287784	AT1G25450	2.31229	2.35946e-70
AT2G45220	-3.87217	3.92521e-60	AT2G45210	-2.83931	3.19174e-10
AT1G55020	-2.41885	4.40206e-63	AT1G54990	-1.11213	8.52602e-15
AT2G39130	-0.913692	9.43226e-17	AT2G39050	-2.22985	1.44696e-05
AT2G46750	-5.48863	2.85073e-43	AT2G46710	1.87498	4.31035e-38
AT1G51160	-0.227682	0.0132871	AT1G51110	6.91948	5.07989e-191
AT2G24600	2.85683	4.64675e-07	AT2G24580	-1.83862	2.78452e-09
AT3G16410	-4.06211	3.80505e-40	AT3G16400	-1.46013	0.00197838
AT2G33790	-6.01612	2.00087e-31	AT2G33750	3.73515	1.71276e-15
AT3G44860	2.4772	0.0224671	AT3G44820	0.583527	0.04329
AT1G73370	-0.80889	0.00232819	AT1G73360	1.68611	1.05163e-11
AT1G62305	-0.56032	0.000302635	AT1G62260	-0.578347	0.00600263
AT1G55390	-2.989	1.96115e-13	AT1G55350	0.410676	0.0376781
AT3G16470	-1.13607	0.0117718	AT3G16450	-3.26201	9.57923e-16
AT4G04920	-0.657397	2.98387e-12	AT4G04870	-0.367807	0.0295482
AT5G54790	-5.58622	7.29366e-19	AT5G54780	-1.35223	2.18667e-21
AT3G01300	-0.674956	0.000262129	AT3G01290	-2.29013	3.828e-10
AT4G30170	-5.06997	1.12934e-88	AT4G30160	-0.442387	4.16118e-08
AT2G46640	6.47675	8.97392e-45	AT2G46630	-0.427545	0.000441611
AT2G43240	-0.353788	0.0271326	AT2G43210	-0.352137	0.000300566
AT5G45080	-6.36155	3.52331e-34	AT5G45070	-6.333	4.34314e-33
AT3G21720	-2.79286	9.5667e-06	AT3G21700	-0.691795	0.00633114
AT5G54540	0.514939	7.00928e-05	AT5G54530	1.27905	0.000200606
AT1G65850	-3.47514	2.95834e-08	AT1G65840	-1.46295	4.7619e-15
AT2G34610	-4.4822	3.22497e-12	AT2G34590	0.703679	2.25881e-05
AT1G14180	0.701289	3.24252e-05	AT1G14170	-1.68784	2.20727e-08
AT2G29760	0.611069	0.000781117	AT2G29750	-5.71763	2.4899e-43
AT3G21720	-2.79286	9.5667e-06	AT3G21700	-0.691795	0.00633114
AT5G56080	-5.80147	1.91439e-05	AT5G56050	-1.48191	0.000564084
AT1G14185	-3.08516	1.45284e-36	AT1G14180	0.701289	3.24252e-05
AT2G22690	-0.461485	0.0140033	AT2G22680	-2.39969	4.89047e-21
AT1G79630	-0.694565	5.19559e-06	AT1G79620	-0.974573	1.25866e-08
AT3G16450	-3.26201	9.57923e-16	AT3G16440	-5.85006	5.97478e-31
AT3G14370	-2.24285	1.2208e-10	AT3G14362	-4.66583	5.91063e-13
AT5G06670	1.36366	1.37971e-28	AT5G06640	-5.57918	6.76065e-40
AT5G56620	-2.58574	1.70235e-12	AT5G56610	-1.79598	6.41771e-09
AT1G09890	-0.406699	0.0278083	AT1G09880	-1.21453	0.00565387
AT5G09980	-4.03406	5.13569e-31	AT5G09978	-5.75798	9.43534e-28
AT3G16440	-5.85006	5.97478e-31	AT3G16420	-1.48348	0.00673682
AT4G14465	-3.11314	3.22212e-56	AT4G14455	-0.684852	6.86127e-09
AT1G75550	0.589246	0.0262516	AT1G75540	-1.60543	1.67493e-14
AT2G41700	-0.20774	0.00727362	AT2G41690	-3.25349	9.77509e-10
AT2G18980	-5.30335	1.31564e-69	AT2G18960	-0.306745	0.0460319
AT4G15340	-5.13487	1.16504e-40	AT4G15330	-5.65948	3.46946e-28
AT5G19900	-0.297517	0.0211322	AT5G19890	-4.40488	0.00316765
AT5G19440	-1.30777	5.80435e-11	AT5G19430	1.12747	3.77455e-11
AT5G18560	-4.9509	1.457e-14	AT5G18525	-0.635799	2.15363e-06
AT5G13550	-0.661147	0.00150515	AT5G13530	-0.300733	0.00363646
AT1G51840	-4.47906	4.10693e-81	AT1G51830	-5.56695	4.51837e-59
AT1G61820	-3.01395	1.96512e-28	AT1G61810	-2.20305	6.01289e-34
AT3G47700	-0.48506	0.000406349	AT3G47690	-0.521668	0.00111165
AT5G61560	2.43365	4.35264e-33	AT5G61550	-5.00928	7.82033e-51
AT3G12730	0.441881	0.0356504	AT3G12710	1.14062	7.24754e-17
AT1G62440	-3.29872	4.93118e-12	AT1G62430	0.586409	0.00947312
AT4G25030	-0.954647	1.82727e-11	AT4G25020	2.10923	7.19004e-07
AT1G73350	0.569999	0.0168649	AT1G73340	-5.00698	1.19953e-51
AT5G05980	-0.490109	0.000154005	AT5G05970	0.420747	0.0154945
AT1G11600	3.72042	2.28177e-55	AT1G11580	-3.75507	2.59544e-34
AT4G15350	-5.64438	5.00072e-11	AT4G15340	-5.13487	1.16504e-40
AT2G19090	-0.664362	0.00051253	AT2G19080	-0.238562	0.0092764
AT1G31070	-1.03906	4.82905e-11	AT1G31050	-5.28585	1.38732e-128
AT3G12900	-6.2989	4.12207e-25	AT3G12860	-1.37819	0.00339439
AT2G25710	-0.517583	0.00167031	AT2G25690	-0.392537	0.0148298
AT4G25240	-1.54298	5.83212e-12	AT4G25230	-0.80239	4.66253e-14
AT4G01760	-5.72592	5.3691e-10	AT4G01740	-2.35603	2.32434e-44
AT5G58700	-1.62971	1.10946e-32	AT5G58670	-0.837151	0.00151837
AT3G07350	2.21583	9.83664e-61	AT3G07330	-0.460816	0.00158845
AT2G35340	0.977786	0.000221386	AT2G35270	-5.64719	7.83901e-34
AT5G54030	-5.4025	8.8408e-15	AT5G53970	2.62237	6.71501e-53
AT2G24600	2.85683	4.64675e-07	AT2G24580	-1.83862	2.78452e-09
AT5G54148	5.61344	1.5813e-13	AT5G54145	-1.49595	0.0025638
AT3G60870	-4.71624	2.69979e-09	AT3G60860	-0.668171	5.1989e-09
AT4G38690	4.40483	1.08249e-20	AT4G38650	0.977401	0.000289795
AT1G13960	-0.630401	4.46936e-09	AT1G13940	0.470995	8.04779e-05
AT5G58690	-2.2114	1.26809e-34	AT5G58670	-0.837151	0.00151837
AT2G46495	-5.16808	3.79116e-21	AT2G46450	1.31814	0.00281091
AT4G14070	2.81232	6.17859e-151	AT4G14060	-5.83609	1.7652e-65
AT3G49960	-5.19483	1.12157e-20	AT3G49950	4.56924	3.17613e-14
AT3G30350	-4.77679	2.5011e-14	AT3G30340	4.96825	5.31912e-19
AT3G60330	-3.33388	1.32272e-39	AT3G60310	0.436479	0.000396979
AT3G27473	-2.79408	1.03979e-07	AT3G27470	-0.888218	3.6858e-14
AT2G39880	1.19157	0.000128843	AT2G39850	6.7857	1.41655e-36
AT2G03505	-3.1745	1.48397e-15	AT2G03500	-1.19396	8.52245e-09
AT5G11110	-1.94962	1.25488e-32	AT5G11100	-1.42076	9.05481e-13
AT1G29025	-5.44124	2.33656e-51	AT1G29020	-4.00075	1.30636e-40
AT5G17330	-4.85033	3.84803e-61	AT5G17310	1.4932	9.96239e-46
AT5G44400	1.64076	4.08752e-05	AT5G44390	-0.991706	0.00450538
AT3G16460	-2.87891	2.02134e-10	AT3G16440	-5.85006	5.97478e-31
AT1G80810	0.472135	0.0385461	AT1G80790	0.550308	0.0251637
AT3G04580	-0.845094	5.01692e-25	AT3G04570	-5.44179	1.98756e-40
AT2G45460	0.440571	0.00046693	AT2G45450	1.37715	0.00454657
AT2G21390	-0.441965	2.19988e-05	AT2G21385	3.27116	7.83266e-155
AT2G22690	-0.461485	0.0140033	AT2G22680	-2.39969	4.89047e-21
AT1G70510	1.49626	8.67843e-05	AT1G70505	1.55998	1.20531e-08
AT1G52110	-4.99308	5.83265e-08	AT1G52100	4.28722	1.45846e-17
AT4G22110	-4.53091	2.45103e-10	AT4G22070	-4.95157	8.85151e-26
AT4G37400	-3.57871	2.01697e-11	AT4G37390	-3.39444	3.35408e-69
AT3G55000	0.299594	0.000797185	AT3G54990	-0.942599	0.00241578
AT2G37420	0.713575	0.00681375	AT2G37410	-0.594609	0.0452786
AT1G61600	-0.758176	0.000221726	AT1G61590	-4.78683	4.35692e-46
AT4G04890	3.71555	2.38231e-36	AT4G04885	0.353308	0.0013885
AT3G53940	-0.471826	0.0350989	AT3G53930	-0.248372	0.0162633
AT1G61370	-1.93289	4.39052e-13	AT1G61360	-1.8002	4.21621e-07
AT1G67900	2.33608	1.44917e-25	AT1G67890	0.521039	0.00208257
AT3G60450	-1.85236	5.96807e-16	AT3G60440	-0.45487	0.00128601
AT1G13110	1.40281	1.0758e-11	AT1G13100	0.961957	0.00474544
AT1G44170	-1.70913	1.26074e-24	AT1G44160	-3.66466	2.25191e-16
AT5G54030	-5.4025	8.8408e-15	AT5G54020	-4.88759	4.83663e-19
AT2G32510	-2.53209	4.89431e-07	AT2G32500	3.60481	1.401e-51
AT2G29750	-5.71763	2.4899e-43	AT2G29740	-2.33506	3.71357e-06
AT5G58940	-2.08577	2.68492e-10	AT5G58930	0.47653	1.65538e-06
AT1G73630	-1.35663	0.00255841	AT1G73620	-1.69815	1.06155e-05
AT3G59220	-4.28481	1.04772e-121	AT3G59210	-1.16602	1.5099e-12
AT2G16980	-5.23475	1.82169e-40	AT2G16970	-6.11387	1.26985e-31
AT4G29400	3.09194	2.40943e-68	AT4G29380	-0.47761	1.62084e-05
AT1G54000	-5.58652	2.25931e-43	AT1G53940	-4.98257	1.54283e-38
AT2G17430	-2.62464	6.29441e-39	AT2G17420	-2.31224	2.40053e-37
AT3G11280	-0.661127	1.19115e-08	AT3G11260	-1.38418	1.53901e-05
AT3G25790	-4.1026	6.36464e-31	AT3G25780	-3.16683	6.09556e-22
AT5G63940	-1.02045	1.19397e-16	AT5G63930	-1.84803	1.69845e-21
AT3G46720	-4.81111	2.8434e-46	AT3G46710	-5.86719	4.3776e-21
AT3G23630	-5.04038	1.4141e-23	AT3G23620	-0.376445	0.0111656
AT5G61060	-0.382363	0.00603977	AT5G61030	-0.605813	0.0452734
AT5G63520	1.42694	5.80262e-27	AT5G63510	-0.430422	5.88225e-07
AT1G64060	-2.72482	2.94618e-33	AT1G64050	0.373555	0.0288879
AT3G48185	-0.623061	0.0062547	AT3G48170	-0.450158	9.0247e-06
AT4G08290	-1.16487	0.0137113	AT4G08280	1.06561	4.56686e-12
AT3G03450	-2.09832	4.4763e-29	AT3G03440	-0.939248	0.00342685
AT2G38410	-0.783652	3.51479e-05	AT2G38400	-1.07428	1.04633e-12
AT4G16265	-0.487328	0.00786472	AT4G16260	-5.07417	7.98754e-48
AT1G33102	1.72058	8.13112e-06	AT1G33090	-5.72635	1.26787e-16
AT5G40770	-0.458121	6.84654e-05	AT5G40760	-1.80363	8.45703e-53
AT5G25160	-4.78179	1.47478e-42	AT5G25150	0.369877	0.0383591
AT2G18960	-0.306745	0.0460319	AT2G18950	1.28633	0.000560723
AT2G28780	-4.45254	8.97821e-20	AT2G28760	-1.40261	5.36056e-12
AT2G32870	8.4884	2.65907e-123	AT2G32850	-0.367552	0.0164482
AT1G10510	1.51311	1.14046e-39	AT1G10480	-4.7086	4.53585e-11
AT3G16410	-4.06211	3.80505e-40	AT3G16390	-3.57997	2.43644e-18
AT5G45540	2.27524	5.26999e-08	AT5G45530	5.01884	1.60326e-14
AT4G12090	-2.4483	2.45738e-07	AT4G12080	-3.35727	1.05408e-32
AT1G75520	-0.627201	0.0179064	AT1G75500	-0.44292	0.0342541
AT4G11320	-4.71419	2.35464e-17	AT4G11310	-3.72019	1.78262e-07
AT3G50640	-5.73966	1.79675e-35	AT3G50620	-1.09468	7.10163e-09
AT5G41220	0.338296	0.00832895	AT5G41180	-1.18444	2.05904e-12
AT5G51770	-1.02528	8.27567e-10	AT5G51750	3.00454	7.55169e-16
AT4G15340	-5.13487	1.16504e-40	AT4G15320	8.59654	3.04248e-09
AT1G73370	-0.80889	0.00232819	AT1G73340	-5.00698	1.19953e-51
AT3G21390	1.19819	1.14484e-20	AT3G21350	0.405059	0.00108545
AT4G16260	-5.07417	7.98754e-48	AT4G16220	-3.78151	9.18726e-08
AT5G10230	-5.04152	3.07811e-33	AT5G10200	-0.38599	0.000154729
AT2G46660	-1.30935	0.000722713	AT2G46630	-0.427545	0.000441611
AT5G12840	0.798551	0.0013596	AT5G12480	-0.561719	1.31685e-10
AT1G33110	1.05053	5.70674e-06	AT1G33102	1.72058	8.13112e-06
AT4G30460	-3.67416	6.63397e-61	AT4G30450	-3.83202	1.39471e-30
AT2G43850	-0.676514	1.65655e-06	AT2G43800	0.772929	0.00194616
AT2G25470	8.81979	8.25753e-10	AT2G25450	0.818272	4.29731e-08
AT5G17820	-5.59893	9.64278e-27	AT5G17800	-4.29811	2.21408e-23
AT5G38460	-0.401609	0.000130686	AT5G38450	-5.87519	5.04543e-18
AT5G54840	-2.1379	3.68464e-14	AT5G54830	-0.744323	3.82854e-05
AT5G51470	-1.51941	1.63448e-05	AT5G51460	1.05811	3.60814e-06
AT2G40370	-5.17287	3.02265e-23	AT2G40360	-0.726777	0.00628139
AT1G76520	0.435768	0.0176935	AT1G76510	0.259523	0.0279398
AT3G46500	-5.43276	7.37277e-54	AT3G46490	2.86735	8.21037e-35
AT1G65070	1.78693	1.81265e-23	AT1G65060	2.36547	4.90208e-14
AT5G02860	1.58149	4.70401e-42	AT5G02840	1.44938	1.828e-10
AT5G41210	0.432462	0.00617613	AT5G41180	-1.18444	2.05904e-12
AT2G41700	-0.20774	0.00727362	AT2G41680	3.23124	6.01338e-199
AT1G67870	0.708949	0.00969354	AT1G67865	4.09425	9.60507e-37
AT1G23340	-0.90299	9.79133e-07	AT1G23330	-1.06254	3.67103e-05
AT1G49240	-1.63266	3.30715e-06	AT1G49230	-1.82908	4.37633e-08
AT1G65950	0.507922	0.0230656	AT1G65930	-0.725618	1.46737e-06
AT1G49580	-0.592597	0.00106973	AT1G49570	-4.97736	5.21606e-05
AT5G44120	2.23721	0.0311639	AT5G44110	-1.55328	7.09402e-12
AT5G48410	-3.84878	1.06568e-18	AT5G48385	-0.251559	0.00839183
AT1G77520	-5.28121	3.09873e-17	AT1G77510	-0.78643	7.09903e-08
AT4G30160	-0.442387	4.16118e-08	AT4G30150	-0.649331	0.000147113
AT5G10320	1.12307	1.82111e-09	AT5G10290	-0.590561	0.000258816
AT5G60910	3.66955	9.02671e-05	AT5G60890	-1.5175	4.01058e-07
AT5G04230	5.37806	2.09518e-152	AT5G04220	1.24991	7.51144e-06
AT2G01980	-0.81049	9.24989e-06	AT2G01970	-0.490886	1.32641e-10
AT4G14640	-2.6017	3.3642e-12	AT4G14630	-5.66944	3.41771e-19
AT1G07590	-2.80206	2.38581e-30	AT1G07550	-5.89004	3.85914e-58
AT1G79180	-3.29163	4.21897e-15	AT1G79160	1.20734	3.17752e-14
AT3G10970	2.68756	5.52448e-144	AT3G10960	-0.92277	0.00134599
AT3G24255	0.406791	0.0199873	AT3G24240	-5.48013	4.81137e-27
AT5G17800	-4.29811	2.21408e-23	AT5G17790	0.742067	9.28505e-05
AT5G48410	-3.84878	1.06568e-18	AT5G48400	-3.12326	7.02204e-07
AT1G14250	7.67331	7.83181e-50	AT1G14240	-4.23284	2.31321e-22
AT1G11490	-2.32697	3.07387e-05	AT1G11480	-0.372909	0.000236799
AT5G08380	1.13136	3.27491e-11	AT5G08370	2.24303	1.22504e-41
AT5G42020	-1.4236	8.46723e-07	AT5G42010	-2.43264	5.60603e-13
AT1G08830	-1.66936	1.08969e-07	AT1G08820	-0.594241	0.00206456
AT4G22120	-0.858086	6.50656e-10	AT4G22110	-4.53091	2.45103e-10
AT2G28810	-0.663416	0.0254246	AT2G28800	2.74344	2.71226e-66
AT1G61370	-1.93289	4.39052e-13	AT1G61360	-1.8002	4.21621e-07
AT4G17785	-6.63761	1.34193e-21	AT4G17770	-0.626331	4.49856e-07
AT3G53840	-0.986038	0.047096	AT3G53830	2.65942	1.02801e-12
AT1G58420	1.08326	0.0433754	AT1G58410	-2.73487	1.21556e-19
AT3G56980	-0.542568	9.23484e-08	AT3G56970	1.2141	1.20534e-08
AT4G05180	6.88155	8.14013e-124	AT4G05170	-2.09945	3.23597e-07
AT5G04980	-0.849045	0.000440128	AT5G04970	-5.86886	2.23497e-22
AT1G35330	-5.47954	2.10885e-11	AT1G35320	-2.63216	4.17619e-30
AT5G64120	-2.56657	1.53594e-11	AT5G64100	-4.9992	4.65088e-45
AT2G38110	-1.24026	0.0010289	AT2G38100	-5.91568	7.64446e-10
AT4G30170	-5.06997	1.12934e-88	AT4G30160	-0.442387	4.16118e-08
AT3G54930	0.538189	0.0147138	AT3G54870	-2.97094	2.21803e-21
AT1G62570	-2.96363	1.79147e-19	AT1G62560	3.92646	7.28505e-37
AT1G62290	2.56295	6.28344e-11	AT1G62280	-5.53861	1.40627e-17
AT4G22570	1.33396	1.08269e-07	AT4G22560	3.48715	2.50117e-22
AT5G13550	-0.661147	0.00150515	AT5G13530	-0.300733	0.00363646
AT1G66450	-3.47082	2.41311e-24	AT1G66440	-6.15921	2.6948e-22
AT1G67490	-0.290304	0.0443539	AT1G67480	-1.12085	1.06929e-09
AT1G33810	2.25781	3.83854e-47	AT1G33800	-3.85595	7.22092e-92
AT4G13430	0.551434	9.66603e-07	AT4G13420	-5.00927	4.81426e-31
AT4G14070	2.81232	6.17859e-151	AT4G14060	-5.83609	1.7652e-65
AT5G49810	-0.875383	1.46525e-26	AT5G49800	0.505224	0.00416778
AT4G14950	-0.680211	2.10377e-08	AT4G14940	-1.71202	4.52313e-26
AT1G27180	-1.35096	1.11488e-22	AT1G27170	-2.12581	2.31837e-26
AT5G38550	-5.30707	3.62272e-55	AT5G38530	-0.940978	7.48233e-18
AT5G43680	0.39388	0.00349743	AT5G43670	-0.487805	0.0307804
AT5G16610	0.475747	3.08799e-05	AT5G16600	-1.53171	1.15377e-10
AT2G01210	-0.780532	4.03394e-06	AT2G01190	-0.881761	0.00655093
AT2G46430	-1.72003	1.57208e-09	AT2G46420	2.03138	1.34619e-07
AT3G19620	3.3327	5.21665e-09	AT3G19590	0.743751	3.23255e-05
AT3G11730	-0.219192	0.0499991	AT3G11720	-0.576368	2.01287e-06
AT2G41700	-0.20774	0.00727362	AT2G41690	-3.25349	9.77509e-10
AT1G80730	-2.46092	4.42075e-05	AT1G80720	-0.345834	0.0331247
AT3G21720	-2.79286	9.5667e-06	AT3G21700	-0.691795	0.00633114
AT3G01290	-2.29013	3.828e-10	AT3G01280	-0.835207	2.2492e-24
AT2G31082	-5.46259	1.54355e-17	AT2G31081	-4.83115	8.15063e-12
AT2G01530	-5.87797	4.19703e-27	AT2G01520	-6.0596	6.36686e-11
AT3G12720	-4.87726	1.31957e-18	AT3G12700	-0.834223	2.24302e-11
AT5G54110	0.364038	0.000388856	AT5G54100	-0.722826	6.13054e-05
AT2G18570	-1.10954	0.00101368	AT2G18560	0.854374	0.00313307
AT1G45145	-3.7675	7.54681e-16	AT1G45130	-1.32378	1.61441e-16
AT4G32800	2.65954	7.0723e-14	AT4G32790	0.309865	0.0354453
AT4G00940	-2.46144	1.24328e-21	AT4G00930	-0.283703	0.042442
AT5G50780	-0.300884	0.0145328	AT5G50760	-4.76146	8.08103e-39
AT5G38030	-4.64026	1.55206e-20	AT5G38020	-4.273	1.10556e-16
AT5G17310	1.4932	9.96239e-46	AT5G17300	2.43154	1.37737e-07
AT1G68810	-0.652097	0.0410063	AT1G68795	-3.6222	1.09464e-21
AT3G19020	0.779558	8.78916e-07	AT3G19000	1.38328	7.16829e-25
AT2G03360	-5.20976	2.73591e-10	AT2G03350	1.3252	2.77692e-47
AT5G04970	-5.86886	2.23497e-22	AT5G04950	-1.42536	6.57908e-21
AT5G45080	-6.36155	3.52331e-34	AT5G45070	-6.333	4.34314e-33
AT1G15140	2.14048	2.01761e-103	AT1G15110	-1.66812	8.6548e-58
AT5G60450	0.47559	1.65313e-07	AT5G60440	-2.30792	3.29005e-08
AT1G66480	-2.29214	2.5415e-25	AT1G66470	-5.16916	2.74267e-22
AT5G20840	0.720354	1.61519e-15	AT5G20820	-3.66765	7.65988e-07
AT3G26500	-1.97456	3.30151e-07	AT3G26490	1.04842	1.09032e-05
AT5G38350	-5.18455	5.8246e-31	AT5G38340	-3.27134	2.50843e-79
AT5G38360	1.69723	1.33023e-35	AT5G38350	-5.18455	5.8246e-31
AT4G20240	-3.87189	8.99156e-73	AT4G20235	-4.42468	1.7986e-16
AT4G25400	-5.74654	2.8521e-26	AT4G25360	-0.884992	2.21933e-11
AT3G58460	-0.297255	0.00713653	AT3G58430	1.70558	6.44157e-13
AT2G02070	3.40337	1.32456e-70	AT2G02050	-0.357907	0.0374974
AT5G40020	-2.78868	8.63907e-14	AT5G40000	-4.37493	3.21287e-05
AT5G23210	0.902356	0.00535087	AT5G23190	-5.24692	1.76042e-28
AT2G35310	1.5115	0.00614243	AT2G35270	-5.64719	7.83901e-34
AT1G32550	4.51889	9.12798e-279	AT1G32510	-2.06696	0.00523348
AT4G17800	-5.11432	4.80907e-32	AT4G17785	-6.63761	1.34193e-21
AT3G16220	1.16169	0.000108087	AT3G16210	-3.91124	1.83735e-05
AT5G43700	0.911398	7.44212e-21	AT5G43670	-0.487805	0.0307804
AT3G09250	2.34971	6.64504e-53	AT3G09240	-4.39272	5.87859e-27
AT5G35970	4.146	8.95581e-95	AT5G35960	-1.49251	0.00131063
AT4G00960	-1.47787	0.010655	AT4G00930	-0.283703	0.042442
AT3G02230	-2.05964	9.47748e-66	AT3G02220	0.270506	0.040531
AT1G44446	5.73394	0	AT1G44318	-4.66073	1.79636e-08
AT3G21340	-5.35091	9.88421e-17	AT3G21330	-1.63539	0.00720191
AT5G54100	-0.722826	6.13054e-05	AT5G54080	0.295369	0.0377817
AT5G40820	-1.00033	0.000186783	AT5G40780	-3.45985	9.65813e-68
AT3G58570	-0.418524	0.00282994	AT3G58560	0.383508	9.32609e-06
AT1G77760	3.0088	1.81448e-25	AT1G77740	0.438948	3.35061e-07
AT1G52870	3.92154	1.53659e-44	AT1G52780	-0.556046	0.00326661
AT1G12030	5.19074	1.98522e-26	AT1G12000	-1.03589	1.28771e-07
AT1G76570	2.82491	1.18987e-19	AT1G76510	0.259523	0.0279398
AT2G22250	-0.657335	4.407e-15	AT2G22140	0.965054	0.00563592
AT5G50170	0.640599	0.00352573	AT5G50130	1.42874	0.000420397
AT3G07490	-4.78264	3.34253e-09	AT3G07420	-0.818202	3.17661e-07
AT1G62290	2.56295	6.28344e-11	AT1G62262	-4.15771	2.83364e-19
AT1G09130	2.37604	1.51408e-151	AT1G09090	-5.33802	9.85298e-26
AT1G69320	6.2326	8.96363e-11	AT1G69310	-0.467089	0.0405557
AT1G30450	-0.416249	0.000106608	AT1G30440	0.290686	0.0260095
AT4G27820	2.6871	2.95652e-24	AT4G27800	2.814	2.60779e-62
AT2G35930	-1.04226	1.35186e-10	AT2G35920	-0.700806	9.00837e-08
AT5G12420	-3.45327	7.02594e-27	AT5G12400	-0.525431	3.52911e-08
AT1G07560	-5.55188	1.17987e-20	AT1G07550	-5.89004	3.85914e-58
AT4G01800	2.88695	2.24824e-285	AT4G01750	-2.48503	8.62473e-12
AT4G01970	-2.9199	0.000699595	AT4G01925	-5.48512	9.79778e-35
AT2G39880	1.19157	0.000128843	AT2G39850	6.7857	1.41655e-36
AT3G50190	-1.99317	5.78594e-07	AT3G50150	-5.8694	3.76601e-16
AT5G10620	2.08761	1.72049e-16	AT5G10580	-5.47922	1.60912e-34
AT3G57830	1.4437	1.53935e-12	AT3G57810	1.40968	3.15679e-32
AT1G71720	2.76644	1.92061e-109	AT1G71696	-0.547997	0.00389807
AT5G59800	1.08658	4.0562e-13	AT5G59770	1.03373	0.000250636
AT1G68910	0.425413	1.05419e-05	AT1G68890	3.79627	8.78283e-36
AT3G49390	-0.739972	4.25522e-19	AT3G49370	-1.56445	3.816e-24
AT2G21620	-1.21057	1.49435e-15	AT2G21610	-6.06269	1.41731e-10
AT3G22980	-0.365013	0.000861062	AT3G22960	0.91478	1.11075e-10
AT4G29750	1.82844	1.69953e-53	AT4G29740	-1.49226	0.00545651
AT4G14070	2.81232	6.17859e-151	AT4G14060	-5.83609	1.7652e-65
AT2G30380	-2.31675	3.66371e-06	AT2G30370	1.42731	3.75559e-06
AT5G19040	-4.15937	4.2455e-50	AT5G19030	0.62732	0.000518684
AT2G45160	0.631247	1.70416e-12	AT2G45150	1.49251	1.08585e-13
AT4G02930	-1.04397	3.08353e-10	AT4G02900	1.2414	5.29553e-11
AT5G49810	-0.875383	1.46525e-26	AT5G49770	-5.34104	1.27677e-56
AT2G23760	3.28405	8.64948e-44	AT2G23740	0.541463	0.00752333
AT4G16900	1.16585	7.73801e-22	AT4G16892	2.88438	6.73195e-12
AT3G18560	-1.44347	2.89486e-18	AT3G18524	0.510268	0.0192629
AT4G14465	-3.11314	3.22212e-56	AT4G14440	0.808882	0.000316986
AT1G50630	-1.8871	1.77457e-10	AT1G50620	0.305042	0.000519993
AT1G06640	-2.10361	1.79552e-22	AT1G06590	-0.507734	0.0066985
AT5G02400	-3.09167	1.98162e-29	AT5G02360	-5.38155	5.46995e-35
AT5G38860	0.492642	0.00494353	AT5G38830	-0.349425	0.00629975
AT2G03505	-3.1745	1.48397e-15	AT2G03500	-1.19396	8.52245e-09
AT2G01680	-0.504048	0.0255729	AT2G01660	-2.04035	5.80357e-15
AT1G52120	-5.16949	7.13394e-09	AT1G52110	-4.99308	5.83265e-08
AT5G09420	-0.788752	0.000836945	AT5G09410	0.769526	2.17027e-10
AT4G18170	1.99327	8.09192e-08	AT4G18160	0.434013	0.02813
AT5G01850	-1.03055	5.29796e-07	AT5G01840	-2.02451	2.87665e-14
AT4G01140	-3.81479	1.95107e-15	AT4G01130	7.13048	3.99402e-102
AT1G60750	-5.72993	1.58823e-15	AT1G60730	-1.90724	4.28321e-11
AT4G17790	-0.903567	1.57404e-22	AT4G17785	-6.63761	1.34193e-21
AT5G12900	0.428993	0.000121086	AT5G12870	-1.62184	8.90405e-07
AT5G14940	-1.53006	5.94288e-09	AT5G14930	0.567881	0.0166933
AT4G21585	0.611212	0.0108817	AT4G21580	-0.455973	0.000651047
AT1G63000	-1.83512	6.48629e-23	AT1G62990	-2.88685	7.26953e-29
AT5G08070	8.21204	2.73308e-14	AT5G08060	-0.396185	0.00793043
AT3G26100	-0.90258	1.49492e-20	AT3G26090	-0.981995	1.20555e-22
AT5G23010	2.90465	1.69087e-17	AT5G23000	-2.92897	1.01384e-17
AT2G15240	-0.427465	0.0215915	AT2G15230	-0.636324	0.0406048
AT1G67830	2.64713	1.98759e-64	AT1G67810	-2.88276	8.40357e-10
AT1G05700	-3.98389	3.82032e-30	AT1G05690	0.795441	0.00994381
AT5G57840	-2.2788	1.77672e-32	AT5G57830	-1.32885	7.25002e-17
AT4G26300	0.319366	0.00132709	AT4G26270	-0.697717	0.00188198
AT3G12720	-4.87726	1.31957e-18	AT3G12700	-0.834223	2.24302e-11
AT1G77330	-4.95925	6.30228e-25	AT1G77320	-0.534073	0.00882688
AT5G40020	-2.78868	8.63907e-14	AT5G40010	-5.36772	7.6271e-15
AT4G29130	-1.02584	4.93735e-13	AT4G29100	-1.09094	9.61199e-08
AT1G24470	2.16116	2.03187e-06	AT1G24460	-0.187352	0.00492496
AT5G38010	-3.20163	7.09005e-12	AT5G38005	-3.40536	1.48225e-07
AT3G11280	-0.661127	1.19115e-08	AT3G11270	-0.51438	0.000100504
AT3G50210	-0.990391	3.29942e-15	AT3G50190	-1.99317	5.78594e-07
AT1G21140	-2.31744	2.16163e-07	AT1G21120	-2.93972	7.5976e-12
AT4G15350	-5.64438	5.00072e-11	AT4G15340	-5.13487	1.16504e-40
AT5G17430	-4.71095	1.51235e-24	AT5G17420	-1.80922	3.33917e-08
AT5G43910	-1.80741	2.22621e-14	AT5G43900	-0.288484	0.0138091
AT1G10700	0.25216	0.0308305	AT1G10690	-0.593447	0.0340997
AT3G51370	-0.487338	0.0100103	AT3G51360	-5.38321	8.27717e-34
AT1G56230	-1.24321	5.23108e-49	AT1G56180	0.922379	1.93529e-13
AT3G62830	-1.71202	2.16898e-46	AT3G62820	6.86439	1.26951e-115
AT1G78120	-3.40686	9.75154e-40	AT1G78100	-1.0979	5.81076e-06
AT3G53490	-0.703131	0.00300971	AT3G53480	-5.0051	1.32012e-65
AT2G35010	-0.29815	0.0259715	AT2G35000	-4.6622	5.4579e-20
AT1G02520	-4.92664	2.57534e-65	AT1G02500	-0.901316	0.00223149
AT3G27300	-1.41767	5.33082e-25	AT3G27290	-1.7991	4.63548e-08
AT4G24020	0.792053	1.80389e-16	AT4G24015	-2.27059	2.71859e-25
AT4G15620	6.33069	2.52204e-56	AT4G15610	-3.61405	8.09205e-13
AT2G38090	-1.46731	1.8541e-08	AT2G38080	-1.52191	1.56404e-10
AT1G75540	-1.60543	1.67493e-14	AT1G75520	-0.627201	0.0179064
AT3G55160	-0.555484	0.0488099	AT3G55150	-4.85682	9.22902e-34
AT5G50300	-4.4956	4.03113e-11	AT5G50290	-1.16403	0.00090971
AT4G33810	-0.424439	0.00773319	AT4G33800	-3.82819	2.14955e-08
AT3G54050	6.66064	5.93008e-148	AT3G54040	-5.75071	2.10225e-48
AT3G62730	-2.93643	1.43809e-06	AT3G62720	0.95313	2.01757e-06
AT4G17260	-1.01953	0.0013227	AT4G17240	1.82104	2.52406e-07
AT5G63380	0.926203	3.69872e-05	AT5G63370	-0.419738	2.08741e-06
AT3G26500	-1.97456	3.30151e-07	AT3G26460	-2.97067	0.000110969
AT4G32860	-5.01345	1.29459e-20	AT4G32850	-0.589527	1.85427e-05
AT1G73280	-4.9589	4.16816e-80	AT1G73270	-5.28286	1.93572e-73
AT5G16760	-0.340615	0.0298957	AT5G16750	-0.566043	0.0203143
AT2G32280	-2.10432	1.82458e-20	AT2G32270	-5.63599	1.50995e-57
AT1G29025	-5.44124	2.33656e-51	AT1G29000	-4.30952	4.97049e-16
AT3G56990	-0.60557	0.0248546	AT3G56970	1.2141	1.20534e-08
AT3G04720	-1.73343	5.75708e-11	AT3G04710	-0.766163	2.11999e-07
AT5G50420	0.347411	0.0132219	AT5G50400	-0.766225	3.48309e-06
AT2G28960	-5.37377	2.41102e-45	AT2G28940	-0.540292	0.000754902
AT3G27510	-4.22658	7.52127e-19	AT3G27500	-1.77856	3.42695e-05
AT3G54540	0.221823	0.0418104	AT3G54510	2.16962	1.61422e-07
AT2G34180	-0.60671	0.0385927	AT2G34170	2.61779	1.48455e-12
AT5G35770	-2.95434	9.57571e-08	AT5G35753	-0.403597	0.0102235
AT3G22800	-5.53082	3.19026e-29	AT3G22790	-0.696747	2.43689e-05
AT5G63860	1.33661	5.73686e-21	AT5G63850	-1.25863	7.14744e-08
AT5G38010	-3.20163	7.09005e-12	AT5G38005	-3.40536	1.48225e-07
AT1G49520	0.387838	0.027787	AT1G49470	-1.72262	1.03562e-12
AT2G32870	8.4884	2.65907e-123	AT2G32860	5.43133	3.50205e-69
AT3G04570	-5.44179	1.98756e-40	AT3G04520	0.958505	0.0118971
AT5G51590	-1.44341	9.30919e-17	AT5G51560	0.91932	3.7635e-05
AT3G04670	-1.62947	3.30843e-14	AT3G04650	1.82869	4.39004e-32
AT2G23010	3.78145	2.09324e-15	AT2G22990	4.3584	9.62373e-23
AT3G55950	-0.9287	0.00397549	AT3G55940	-1.51914	0.00678312
AT1G49580	-0.592597	0.00106973	AT1G49520	0.387838	0.027787
AT2G32880	7.77776	1.69897e-110	AT2G32870	8.4884	2.65907e-123
AT1G25460	-1.50565	0.000287784	AT1G25425	3.35654	3.05527e-36
AT5G58670	-0.837151	0.00151837	AT5G58660	-1.99949	0.000450076
AT5G43600	-0.329716	0.0106723	AT5G43590	-4.6056	4.42267e-10
AT5G50850	-0.347133	2.78707e-05	AT5G50820	-0.93288	0.0024706
AT2G43945	2.72903	2.41486e-53	AT2G43880	-5.59007	3.69557e-38
AT5G15740	-0.335471	0.026995	AT5G15730	-0.648112	6.78253e-14
AT1G30720	-1.43255	0.012066	AT1G30700	-4.1307	6.80144e-18
AT4G18050	0.727519	0.00757612	AT4G18040	-0.190511	0.0376308
AT1G10940	0.311359	0.00126	AT1G10930	1.19256	0.00144317
AT5G07660	1.17414	0.000102933	AT5G07650	-4.40425	1.71903e-19
AT1G17750	-2.40975	5.26011e-09	AT1G17745	-3.40757	3.27074e-21
AT4G15620	6.33069	2.52204e-56	AT4G15610	-3.61405	8.09205e-13
AT5G54050	-5.60894	8.33764e-11	AT5G54040	-4.83936	7.57038e-16
AT5G65600	-1.68558	0.0197692	AT5G65590	4.82218	1.35737e-56
AT5G24910	-4.4636	6.26391e-54	AT5G24900	-4.01128	9.67486e-12
AT1G24420	-4.73168	9.47254e-13	AT1G24400	5.83633	1.09483e-61
AT1G11180	0.989791	0.00376922	AT1G11170	-0.592281	0.0153742
AT5G04370	-1.05539	0.0463664	AT5G04360	2.57312	4.02052e-85
AT3G24190	1.65189	6.48248e-16	AT3G24180	-0.606898	1.09305e-09
AT2G21045	-5.59159	2.56734e-27	AT2G20990	0.425321	0.000450832
AT5G44790	-2.49541	2.05717e-23	AT5G44785	1.56302	7.02158e-22
AT5G09978	-5.75798	9.43534e-28	AT5G09970	7.10401	1.01566e-13
AT5G49665	-0.762201	6.67594e-06	AT5G49660	-0.416618	0.0159297
AT1G75860	0.54782	0.0385624	AT1G75850	-0.368963	1.5387e-05
AT1G66450	-3.47082	2.41311e-24	AT1G66430	2.63307	3.57642e-152
AT2G39950	0.409436	0.00740347	AT2G39930	1.75992	6.13973e-113
AT5G03850	-0.311743	6.52048e-06	AT5G03840	-2.73638	9.49933e-16
AT3G25790	-4.1026	6.36464e-31	AT3G25780	-3.16683	6.09556e-22
AT4G15680	5.2713	1.95451e-52	AT4G15660	6.15565	4.58939e-30
AT2G18370	-5.14697	5.80853e-38	AT2G18360	-3.46414	6.6236e-65
AT5G24420	5.21649	2.34449e-19	AT5G24410	-6.42373	3.30873e-29
AT3G04090	-0.412879	0.0235058	AT3G04080	-0.840832	1.40902e-12
AT4G33730	-5.63729	3.25601e-32	AT4G33720	-5.3588	4.71292e-16
AT1G53635	-5.83156	2.04461e-17	AT1G53633	-2.9836	3.96604e-07
AT1G51890	-2.8958	4.27073e-14	AT1G51880	-5.75359	8.00642e-38
AT5G54790	-5.58622	7.29366e-19	AT5G54780	-1.35223	2.18667e-21
AT2G40120	-1.45825	3.96106e-18	AT2G40110	-2.30278	7.84189e-16
AT1G14040	-2.9639	4.82658e-17	AT1G14030	3.49445	3.78235e-137
AT1G29030	-0.579994	1.61037e-05	AT1G29020	-4.00075	1.30636e-40
AT1G24470	2.16116	2.03187e-06	AT1G24460	-0.187352	0.00492496
AT3G18400	-4.59315	1.53035e-43	AT3G18390	3.48032	1.20334e-83
AT2G40475	1.35422	1.54308e-25	AT2G40470	-2.94977	3.55782e-18
AT5G24310	-0.719194	9.83346e-08	AT5G24300	2.87353	9.82966e-76
AT1G29230	-2.08214	1.15103e-05	AT1G29200	-1.57029	1.1899e-05
AT5G48390	-0.995128	0.021048	AT5G48385	-0.251559	0.00839183
AT1G05640	-0.852887	8.72933e-06	AT1G05630	1.33603	1.16132e-17
AT4G27250	-2.00536	0.00501366	AT4G27240	3.00351	1.30753e-48
AT1G70500	-2.37498	5.43151e-16	AT1G70490	0.266385	0.035923
AT1G56450	-0.206501	0.0081991	AT1G56430	2.37347	3.67033e-21
AT5G19690	-0.57449	5.73949e-05	AT5G19680	-0.559645	1.38215e-10
AT1G54000	-5.58652	2.25931e-43	AT1G53950	-6.86269	5.1049e-17
AT2G43040	-2.12208	1.05406e-39	AT2G43000	-2.92811	7.27113e-05
AT3G22410	1.38738	3.48133e-07	AT3G22400	-1.5917	1.08638e-36
AT3G10690	1.02191	0.000340395	AT3G10660	-2.65623	7.24908e-36
AT4G04920	-0.657397	2.98387e-12	AT4G04910	-0.577601	4.97833e-09
AT2G28580	4.62579	6.30227e-08	AT2G28570	-3.3139	8.34281e-48
AT4G36910	1.163	2.13287e-08	AT4G36890	-0.823276	0.000216407
AT5G52420	1.42897	1.01157e-17	AT5G52410	0.733474	1.03818e-05
AT5G53130	1.03822	1.31782e-13	AT5G53110	-4.12225	1.50231e-16
AT4G15233	0.964055	0.0216342	AT4G15230	-3.8033	1.81464e-20
AT5G45970	-2.12701	2.23874e-10	AT5G45960	3.24867	2.6226e-11
AT1G73360	1.68611	1.05163e-11	AT1G73340	-5.00698	1.19953e-51
AT4G04940	-0.948043	0.000240596	AT4G04925	0.665333	0.00655201
AT1G10270	-0.43537	0.00899485	AT1G10240	0.546138	1.64094e-06
AT1G29030	-0.579994	1.61037e-05	AT1G29025	-5.44124	2.33656e-51
AT1G62360	6.37958	1.74971e-34	AT1G62350	-0.56954	0.0138868
AT2G34510	3.03113	4.52839e-13	AT2G34500	-4.34388	6.36343e-13
AT3G47730	-1.83988	9.76946e-12	AT3G47700	-0.48506	0.000406349
AT5G26680	-0.530886	0.00795471	AT5G26710	-0.340951	0.0309277
AT5G51930	-5.30196	5.98013e-14	AT5G51920	-1.7658	3.9118e-11
AT3G12720	-4.87726	1.31957e-18	AT3G12710	1.14062	7.24754e-17
AT1G29200	-1.57029	1.1899e-05	AT1G29195	-2.0248	2.68622e-12
AT1G77520	-5.28121	3.09873e-17	AT1G77500	-0.992637	9.73461e-11
AT2G32700	0.180024	0.0342135	AT2G32690	6.89095	8.86527e-101
AT4G20960	1.85199	3.94451e-58	AT4G20940	0.868011	6.32214e-05
AT2G40400	2.06999	3.38893e-93	AT2G40370	-5.17287	3.02265e-23
AT1G16530	-2.54721	1.48671e-10	AT1G16520	-0.315605	0.0144909
AT4G04740	-0.228766	0.00663839	AT4G04720	0.408264	0.0051689
AT5G45105	-5.47019	1.46016e-11	AT5G45090	-4.4407	3.07109e-07
AT4G03250	0.700727	0.000129817	AT4G03230	-0.771347	4.59371e-06
AT1G80490	-0.256172	0.00417206	AT1G80480	1.79674	8.34927e-51
AT5G17260	-1.08156	0.00363072	AT5G17250	-0.375738	0.0129555
AT1G66470	-5.16916	2.74267e-22	AT1G66440	-6.15921	2.6948e-22
AT2G20010	-1.29918	6.52698e-09	AT2G20000	0.325994	0.0363003
AT2G27510	-2.48274	4.08759e-40	AT2G27500	0.569601	0.0376749
AT3G46740	1.26191	1.10869e-71	AT3G46700	-4.78572	2.28174e-12
AT4G19690	-5.65376	5.04539e-09	AT4G19670	-0.629771	0.00125337
AT1G80810	0.472135	0.0385461	AT1G80790	0.550308	0.0251637
AT5G65690	-5.75113	4.39055e-60	AT5G65683	-1.2413	3.52816e-36
AT2G37150	-0.705565	2.59063e-07	AT2G37130	-2.55278	1.31304e-12
AT5G14230	-1.30143	5.30244e-06	AT5G14220	0.836973	2.6618e-11
AT1G73990	1.19485	1.57056e-10	AT1G73960	0.47446	0.00967165
AT2G38320	-0.849072	7.72476e-09	AT2G38300	1.05916	0.000493464
AT4G23700	-4.31437	2.38626e-47	AT4G23680	-1.55766	0.0199095
AT2G01540	-1.40978	4.23749e-06	AT2G01530	-5.87797	4.19703e-27
AT2G28650	-1.15012	3.12265e-07	AT2G28630	5.00638	2.66258e-22
AT3G12977	-4.37848	3.08874e-48	AT3G12970	-0.856928	0.00392419
AT4G01950	2.55836	4.61423e-18	AT4G01925	-5.48512	9.79778e-35
AT1G51570	1.36181	3.26377e-50	AT1G51560	1.27672	1.1777e-19
AT2G28270	-6.92205	1.29172e-16	AT2G28260	0.663982	0.0189849
AT4G01750	-2.48503	8.62473e-12	AT4G01740	-2.35603	2.32434e-44
AT1G76510	0.259523	0.0279398	AT1G76500	-3.67119	6.67182e-35
AT1G13000	-0.38925	0.00281315	AT1G12990	1.06327	8.30737e-08
AT1G17760	-0.280992	0.0224875	AT1G17750	-2.40975	5.26011e-09
AT4G04920	-0.657397	2.98387e-12	AT4G04910	-0.577601	4.97833e-09
AT4G01770	-4.8005	2.56623e-21	AT4G01760	-5.72592	5.3691e-10
AT5G35760	-1.08166	0.0172336	AT5G35753	-0.403597	0.0102235
AT1G33720	8.50794	6.02368e-16	AT1G33700	-1.81834	3.58927e-23
AT5G14030	-0.778224	6.33772e-09	AT5G14020	-5.6748	8.72429e-25
AT3G04720	-1.73343	5.75708e-11	AT3G04710	-0.766163	2.11999e-07
AT2G38110	-1.24026	0.0010289	AT2G38080	-1.52191	1.56404e-10
AT2G38700	-0.750916	2.40571e-07	AT2G38695	1.45521	6.36181e-19
AT2G01480	-0.503755	0.000101091	AT2G01470	-0.288888	0.000758186
AT1G74770	-4.17215	2.81364e-31	AT1G74750	-0.562426	0.00127365
AT1G61500	1.16092	1.60593e-10	AT1G61490	-0.578744	0.0422436
AT4G15290	-6.24561	2.76336e-30	AT4G15280	-2.99188	2.81384e-07
AT3G22800	-5.53082	3.19026e-29	AT3G22790	-0.696747	2.43689e-05
AT2G46430	-1.72003	1.57208e-09	AT2G46420	2.03138	1.34619e-07
AT2G41690	-3.25349	9.77509e-10	AT2G41680	3.23124	6.01338e-199
AT2G28260	0.663982	0.0189849	AT2G28250	-2.65565	2.84917e-43
AT1G13710	2.09062	1.61342e-12	AT1G13700	1.32669	5.51936e-07
AT3G26130	-3.79787	9.63658e-17	AT3G26120	-4.00192	3.72941e-07
AT1G62280	-5.53861	1.40627e-17	AT1G62260	-0.578347	0.00600263
AT3G16450	-3.26201	9.57923e-16	AT3G16410	-4.06211	3.80505e-40
AT5G51640	-0.863912	9.88195e-06	AT5G51630	-2.0867	1.86769e-58
AT1G55940	-3.2339	2.31118e-35	AT1G55930	1.1909	9.45977e-10
AT3G16350	-1.92151	7.96307e-15	AT3G16340	-2.47987	1.37364e-57
AT1G10060	4.84125	2.03348e-91	AT1G10050	-1.71792	6.27942e-31
AT5G03630	-1.4827	7.36113e-76	AT5G03620	3.15474	5.63927e-14
AT5G50420	0.347411	0.0132219	AT5G50410	0.385172	0.0436639
AT5G59140	-0.547211	0.000906922	AT5G59130	6.55007	3.24976e-25
AT3G45400	-0.415742	0.00947874	AT3G45390	-2.64176	3.34253e-09
AT4G05040	0.8092	1.49962e-05	AT4G05020	-2.31601	5.10495e-12
AT1G34190	-0.491972	8.97651e-05	AT1G34180	-3.15672	1.80761e-11
AT3G57020	-0.757334	2.79702e-06	AT3G57010	-4.30483	1.04216e-52
AT1G60470	-6.01946	8.00669e-34	AT1G60460	2.18536	1.10652e-07
AT3G57050	0.195571	0.00370957	AT3G57030	0.391132	0.0140976
AT5G50130	1.42874	0.000420397	AT5G50120	-3.01384	2.1416e-17
AT2G28580	4.62579	6.30227e-08	AT2G28570	-3.3139	8.34281e-48
AT5G40830	-0.440126	0.00741052	AT5G40820	-1.00033	0.000186783
AT1G66690	-2.07017	0.00154859	AT1G66680	-0.495037	0.000562191
AT3G54100	-1.10424	3.26267e-10	AT3G54090	3.492	1.16693e-138
AT5G49580	0.528708	0.00118936	AT5G49570	-0.44052	0.000346937
AT3G44326	-5.96548	6.32503e-17	AT3G44320	-3.34817	6.44148e-53
AT1G61770	-0.686114	0.000142985	AT1G61760	-1.06278	0.000675469
AT4G02530	4.55	2.90974e-188	AT4G02510	1.5241	1.11995e-66
AT2G31170	1.98731	2.79024e-25	AT2G31160	0.558765	0.0307742
AT2G37420	0.713575	0.00681375	AT2G37410	-0.594609	0.0452786
AT1G78090	-2.32204	1.94244e-25	AT1G78080	-0.664623	0.00376154
AT1G49580	-0.592597	0.00106973	AT1G49570	-4.97736	5.21606e-05
AT1G65070	1.78693	1.81265e-23	AT1G65060	2.36547	4.90208e-14
AT5G45410	-0.875663	0.00226788	AT5G45390	2.57642	2.00875e-141
AT3G18270	0.672562	4.93118e-11	AT3G18240	-0.672355	0.00486356
AT5G06790	3.26512	2.33738e-19	AT5G06780	0.325538	0.00155781
AT2G32970	0.61179	0.00234307	AT2G32960	-1.01007	5.77958e-11
AT1G08340	-2.70488	3.76571e-55	AT1G08320	-4.66741	6.36294e-52
AT3G07970	-4.46866	1.53013e-28	AT3G07960	-0.908032	0.00236808
AT4G15233	0.964055	0.0216342	AT4G15230	-3.8033	1.81464e-20
AT2G39040	-5.94043	1.70033e-37	AT2G39020	0.330029	0.0228451
AT1G72230	-2.00048	1.62912e-08	AT1G72220	-2.69179	6.87103e-16
AT4G40070	-2.96791	2.05847e-14	AT4G40065	-1.18802	0.00890489
AT1G59660	-0.790388	1.35296e-06	AT1G59650	-0.441255	0.00178483
AT2G46750	-5.48863	2.85073e-43	AT2G46720	6.0217	8.05325e-40
AT2G20630	-0.733865	1.77339e-09	AT2G20610	0.321252	0.00196452
AT2G37540	0.471142	0.00496031	AT2G37500	0.867881	6.83473e-13
AT1G72300	-0.899959	1.46566e-06	AT1G72280	-0.464237	0.0184774
AT3G50280	-4.13983	1.05636e-11	AT3G50230	-4.7061	1.32222e-18
AT3G29410	-2.06316	2.95329e-17	AT3G29390	0.52436	0.000912013
AT2G36390	0.883062	2.01585e-08	AT2G36380	-2.95573	2.64106e-45
AT1G05310	-0.632847	0.0154954	AT1G05280	-5.43087	5.66233e-09
AT1G26700	-5.30639	9.16576e-27	AT1G26690	-0.753996	0.00315472
AT5G66600	-1.28504	2.01148e-05	AT5G66570	6.38821	3.72154e-135
AT5G40020	-2.78868	8.63907e-14	AT5G39990	-1.05556	5.96403e-11
AT4G30170	-5.06997	1.12934e-88	AT4G30140	1.14038	0.0321303
AT5G07690	5.35957	7.01176e-32	AT5G07680	-3.57458	5.04075e-28
AT2G45210	-2.83931	3.19174e-10	AT2G45190	8.41253	6.73703e-165
AT1G14920	1.23342	1.68044e-12	AT1G14910	0.274393	0.00795946
AT5G09800	-1.49963	0.000125209	AT5G09790	0.608421	0.000136903
AT3G13772	-0.94097	8.11137e-06	AT3G13730	-1.21339	2.09599e-15
AT4G31590	0.215592	0.020495	AT4G31570	-0.458193	0.00163032
AT2G28780	-4.45254	8.97821e-20	AT2G28710	-2.40112	2.44057e-05
AT2G16990	-1.8623	2.48068e-12	AT2G16980	-5.23475	1.82169e-40
AT3G27890	-1.38507	3.05628e-19	AT3G27884	-5.65902	1.28356e-13
AT2G46760	-1.73175	1.06387e-08	AT2G46740	-4.53993	4.61185e-24
AT2G01970	-0.490886	1.32641e-10	AT2G01950	-2.05454	2.63683e-10
AT3G24140	8.49755	2.38394e-76	AT3G24120	0.381938	0.00363441
AT1G27110	-2.73866	1.91202e-34	AT1G27100	0.975705	7.10524e-05
AT5G40820	-1.00033	0.000186783	AT5G40780	-3.45985	9.65813e-68
AT1G55390	-2.989	1.96115e-13	AT1G55380	-2.66179	1.02868e-14
AT2G30980	0.596529	6.33348e-08	AT2G30970	-0.345886	2.54644e-07
AT3G03060	-0.909949	0.0017559	AT3G03050	-1.65662	3.57005e-61
AT5G01050	-5.2687	9.29581e-49	AT5G01040	-1.95327	7.7654e-10
AT3G01100	-0.817856	1.90806e-09	AT3G01060	5.6581	1.14542e-85
AT2G30220	-6.39933	3.69335e-08	AT2G30140	0.721588	0.0179608
AT5G51150	0.795094	1.15157e-13	AT5G51140	1.06213	2.6736e-29
AT1G75380	2.35838	1.8095e-48	AT1G75370	0.785634	2.46162e-06
AT5G43520	-5.80669	8.39968e-27	AT5G43500	0.530152	0.000211645
AT1G24430	-5.40194	3.51897e-19	AT1G24330	1.32731	0.00408642
AT2G27550	-5.14188	7.9065e-131	AT2G27535	-5.58628	5.07729e-08
AT4G40065	-1.18802	0.00890489	AT4G40020	-2.40761	0.000908637
AT4G14480	6.84256	4.24128e-84	AT4G14465	-3.11314	3.22212e-56
AT2G02620	-6.10067	3.57101e-12	AT2G02610	-6.02036	8.14254e-34
AT2G30080	-0.62533	0.000429531	AT2G30050	-0.659279	0.000429656
AT4G12050	-5.58783	6.00496e-39	AT4G12040	-0.783311	0.00137796
AT5G45370	-0.588268	2.19988e-05	AT5G45350	1.3302	3.09023e-20
AT3G18600	-0.783227	0.00254826	AT3G18560	-1.44347	2.89486e-18
AT2G38100	-5.91568	7.64446e-10	AT2G38070	0.917584	0.000960298
AT4G01590	0.316939	0.0199095	AT4G01580	3.03448	3.22155e-34
AT3G10090	-0.577288	2.01678e-06	AT3G06430	2.20456	2.94574e-26
AT3G61250	4.65613	1.58192e-31	AT3G61220	0.997294	0.000613977
AT1G11080	1.62374	7.34496e-10	AT1G11070	-0.979147	0.00278702
AT5G17820	-5.59893	9.64278e-27	AT5G17800	-4.29811	2.21408e-23
AT5G08250	-4.37771	2.51858e-15	AT5G08240	-3.87614	6.81626e-18
AT3G48350	0.808124	4.70055e-05	AT3G48320	4.53464	3.82022e-62
AT5G62560	-0.615718	0.0270261	AT5G62550	0.417571	0.00902278
AT4G25550	0.512711	9.69958e-11	AT4G25540	-0.757372	0.000324663
AT4G14465	-3.11314	3.22212e-56	AT4G14450	2.8059	1.40676e-09
AT2G37940	-0.307796	0.0054344	AT2G37890	-0.820768	0.000110345
AT4G33770	-0.867048	0.00478648	AT4G33700	-0.58236	3.15035e-07
AT2G45190	8.41253	6.73703e-165	AT2G45150	1.49251	1.08585e-13
AT1G33280	-4.86506	7.03008e-13	AT1G33270	0.607031	0.000824198
AT5G38340	-3.27134	2.50843e-79	AT5G38280	-4.27793	1.52685e-93
AT3G18280	-2.06153	1.98266e-44	AT3G18230	-0.687127	8.05127e-08
AT3G13070	1.17482	1.00824e-07	AT3G13050	-0.603909	0.000323375
AT3G15340	-2.60025	1.38491e-39	AT3G15240	-5.19059	5.58397e-12
AT5G26730	-3.65014	1.47562e-12	AT5G26740	-0.55537	0.027077
AT3G54670	-0.236402	0.031151	AT3G54660	2.28309	1.25182e-192
AT5G24090	-5.03774	4.224e-40	AT5G24070	-4.89795	1.26675e-14
AT2G27040	0.677654	0.0405226	AT2G27030	-0.301582	0.0298853
AT1G14430	3.63616	2.93323e-34	AT1G14380	0.351979	0.0072542
AT2G22740	1.07119	8.29817e-14	AT2G22680	-2.39969	4.89047e-21
AT4G33010	3.96759	1.71526e-38	AT4G33000	4.05383	6.52192e-101
AT5G67340	-1.66019	4.45859e-17	AT5G67330	0.447128	0.0138249
AT3G48350	0.808124	4.70055e-05	AT3G48340	-5.73085	1.14053e-32
AT1G15140	2.14048	2.01761e-103	AT1G15130	-0.341582	0.00155361
AT5G18840	-2.28688	5.80312e-07	AT5G18830	-0.710669	1.02794e-07
AT3G08490	-2.59916	1.86483e-12	AT3G08040	-3.60741	1.1808e-63
AT4G25070	-4.2125	1.31734e-34	AT4G25050	5.04082	5.27297e-54
AT1G54990	-1.11213	8.52602e-15	AT1G54970	-5.1016	3.1181e-23
AT5G19580	4.20108	8.79603e-31	AT5G19550	-1.07897	2.78593e-05
AT1G18140	-3.57713	1.79708e-09	AT1G18100	-5.33591	9.18752e-35
AT3G47790	-5.48692	5.99025e-40	AT3G47780	-3.18669	3.62192e-58
AT4G38340	-1.12468	0.000511153	AT4G38330	1.42468	7.5891e-07
AT3G24770	0.454285	0.000672793	AT3G24760	-0.539058	0.000175898
AT1G57590	-3.90101	1.87617e-07	AT1G57570	-4.89304	3.36848e-27
AT5G20890	-0.452164	3.93173e-05	AT5G20885	-1.1136	3.73665e-07
AT5G20470	-4.88473	2.02675e-13	AT5G20450	0.601377	0.00148235
AT3G53520	-0.462249	0.000523567	AT3G53510	-1.98166	3.31331e-11
AT1G03850	-2.24126	9.75818e-08	AT1G03840	-4.37555	2.39555e-50
AT1G67460	0.867474	0.0300367	AT1G67440	1.81783	3.36592e-40
AT5G63450	-1.3765	0.00979756	AT5G63420	2.21575	1.51626e-19
AT5G26280	-3.56768	1.62416e-11	AT5G26270	-1.27498	0.0446258
AT3G25530	0.823394	1.10311e-07	AT3G25510	-2.68279	6.19784e-26
AT2G38110	-1.24026	0.0010289	AT2G38100	-5.91568	7.64446e-10
AT2G02620	-6.10067	3.57101e-12	AT2G02610	-6.02036	8.14254e-34
AT5G48412	-2.49505	8.67833e-08	AT5G48410	-3.84878	1.06568e-18
AT4G20230	-2.6083	1.37776e-21	AT4G20210	-4.96853	1.81697e-29
AT2G45190	8.41253	6.73703e-165	AT2G45150	1.49251	1.08585e-13
AT2G43070	-0.312807	0.00454541	AT2G43040	-2.12208	1.05406e-39
AT2G25760	0.345556	0.000434362	AT2G25737	0.554989	0.000616636
AT3G24800	-0.273027	0.0459945	AT3G24750	-6.94344	6.35882e-21
AT4G02520	-1.01631	0.00815186	AT4G02510	1.5241	1.11995e-66
AT3G44860	2.4772	0.0224671	AT3G44850	-0.387047	0.0150632
AT5G38005	-3.40536	1.48225e-07	AT5G37990	-6.24191	3.03102e-22
AT3G11330	-1.03247	1.89852e-21	AT3G11290	0.809045	2.98758e-14
AT3G53490	-0.703131	0.00300971	AT3G53480	-5.0051	1.32012e-65
AT5G65170	-1.23561	3.93592e-06	AT5G65160	-3.00347	2.80515e-27
AT1G07175	-3.85582	2.627e-05	AT1G07160	1.5079	0.00404303
AT5G11240	-0.490031	0.00622304	AT5G11230	-3.47622	2.59521e-75
AT1G55970	0.933698	9.84496e-07	AT1G55960	1.63932	6.49697e-08
AT5G56210	0.896338	2.86333e-08	AT5G56200	-3.30314	8.17065e-13
AT1G66480	-2.29214	2.5415e-25	AT1G66470	-5.16916	2.74267e-22
AT2G33210	-0.553554	0.0466073	AT2G33150	-0.639601	0.00396822
AT4G14770	1.33264	1.10482e-08	AT4G14760	-0.480405	0.0127951
AT1G02530	-2.20357	0.0024864	AT1G02520	-4.92664	2.57534e-65
AT1G68910	0.425413	1.05419e-05	AT1G68890	3.79627	8.78283e-36
AT4G21680	-0.882171	0.0254223	AT4G21660	0.380735	0.0239532
AT1G51480	-6.29453	3.19735e-11	AT1G51470	-5.86402	1.98259e-20
AT2G24270	5.75371	3.52657e-46	AT2G24260	-3.36031	1.0716e-36
AT5G18680	-0.749105	5.81627e-05	AT5G18670	1.49738	2.94274e-33
AT5G38344	-5.57082	1.28035e-26	AT5G38340	-3.27134	2.50843e-79
AT1G30650	-4.31343	1.22381e-114	AT1G30640	-1.38342	5.19883e-17
AT1G60940	0.813694	1.81733e-09	AT1G60930	0.837399	0.000201197
AT5G25110	-3.76888	1.28642e-57	AT5G25100	-0.257566	0.0274887
AT3G21700	-0.691795	0.00633114	AT3G21690	1.06089	1.17121e-05
AT4G09510	1.12639	1.07118e-14	AT4G09500	1.63023	0.000137312
AT5G04980	-0.849045	0.000440128	AT5G04970	-5.86886	2.23497e-22
AT4G30580	1.40664	1.36082e-18	AT4G30560	-1.44128	5.45661e-22
AT3G53480	-5.0051	1.32012e-65	AT3G53470	5.30411	1.81951e-166
AT4G14500	0.86978	2.92942e-24	AT4G14490	0.507844	0.0086926
AT1G16120	-5.37175	7.40947e-23	AT1G16110	1.07539	0.000129305
AT4G11330	1.11326	0.000129656	AT4G11320	-4.71419	2.35464e-17
AT1G63530	-1.83486	1.98149e-06	AT1G63520	-1.64167	3.96461e-05
AT5G58550	-0.531674	0.00392659	AT5G58520	-0.372198	0.00196382
AT2G25470	8.81979	8.25753e-10	AT2G25450	0.818272	4.29731e-08
AT1G33610	2.29051	3.06385e-15	AT1G33600	4.97643	5.66839e-141
AT4G35250	4.92444	7.52037e-215	AT4G35240	0.773696	1.15461e-11
AT1G79340	-0.612432	0.00165991	AT1G79330	-2.61993	1.20361e-24
AT5G65500	-4.50948	6.45051e-13	AT5G65490	0.74235	8.07284e-10
AT1G62320	-5.42344	3.39868e-39	AT1G62310	0.531839	4.45391e-05
AT1G79340	-0.612432	0.00165991	AT1G79320	-4.85692	8.28902e-46
AT5G45300	0.690703	3.77067e-09	AT5G45290	-0.421688	0.0120291
AT1G52110	-4.99308	5.83265e-08	AT1G52100	4.28722	1.45846e-17
AT1G79330	-2.61993	1.20361e-24	AT1G79320	-4.85692	8.28902e-46
AT5G22410	-4.94953	1.39791e-69	AT5G22400	-0.350481	0.00662138
AT3G03650	-5.38688	4.44707e-21	AT3G03640	-1.43782	1.18101e-25
AT1G66480	-2.29214	2.5415e-25	AT1G66470	-5.16916	2.74267e-22
AT2G16720	-3.48769	1.23937e-76	AT2G16710	-0.373185	0.0139073
AT1G27690	0.714351	0.00175516	AT1G27680	0.914654	3.29408e-05
AT1G45230	2.58657	4.80362e-46	AT1G45249	0.435764	0.0228568
AT2G29960	-0.534025	0.00022292	AT2G29940	5.6035	1.67481e-69
AT5G49665	-0.762201	6.67594e-06	AT5G49660	-0.416618	0.0159297
AT5G57040	2.87141	9.80757e-34	AT5G57030	4.49959	2.53804e-127
AT1G27200	0.259168	0.0247949	AT1G27180	-1.35096	1.11488e-22
AT3G57330	-0.563694	0.00872339	AT3G57300	0.290504	0.0224796
AT1G54330	-1.92039	5.98346e-06	AT1G54320	-1.01693	1.43344e-06
AT3G12730	0.441881	0.0356504	AT3G12720	-4.87726	1.31957e-18
AT4G03000	0.542089	9.28973e-05	AT4G02990	2.38755	1.08629e-95
AT2G14620	-0.859178	0.00127406	AT2G14610	6.01671	1.1982e-05
AT2G28540	0.665908	2.178e-09	AT2G28520	-0.492179	9.75829e-13
AT1G61380	1.81415	1.03066e-08	AT1G61360	-1.8002	4.21621e-07
AT3G04090	-0.412879	0.0235058	AT3G04070	-1.92025	1.27688e-07
AT5G13550	-0.661147	0.00150515	AT5G13530	-0.300733	0.00363646
AT1G73360	1.68611	1.05163e-11	AT1G73340	-5.00698	1.19953e-51
AT2G28315	-2.20004	2.91474e-10	AT2G28310	-0.26364	0.0249585
AT4G00700	-4.9156	5.21504e-29	AT4G00695	-1.42175	0.0127842
AT5G21222	3.79446	6.57366e-225	AT5G21150	1.52989	0.0489086
AT1G51840	-4.47906	4.10693e-81	AT1G51830	-5.56695	4.51837e-59
AT1G12600	-1.20254	0.00208693	AT1G12570	4.33362	3.36978e-18
AT5G19530	-1.54652	0.000114523	AT5G19520	-5.14117	6.04969e-19
AT1G56230	-1.24321	5.23108e-49	AT1G56210	0.37364	0.00286461
AT1G55300	0.822932	5.08919e-08	AT1G55290	-4.60659	1.2714e-09
AT2G43900	1.48229	6.83087e-11	AT2G43880	-5.59007	3.69557e-38
AT1G14185	-3.08516	1.45284e-36	AT1G14170	-1.68784	2.20727e-08
AT5G42510	-5.96483	2.49728e-23	AT5G42500	-5.66765	3.05201e-20
AT1G29020	-4.00075	1.30636e-40	AT1G29000	-4.30952	4.97049e-16
AT3G47980	-3.50018	7.87571e-90	AT3G47965	-1.18362	0.00106387
AT4G36360	0.460691	1.79567e-05	AT4G36290	0.521347	0.00107143
AT1G74840	-1.47391	3.02667e-24	AT1G74810	3.63025	3.11237e-05
AT5G16610	0.475747	3.08799e-05	AT5G16600	-1.53171	1.15377e-10
AT3G46500	-5.43276	7.37277e-54	AT3G46490	2.86735	8.21037e-35
AT4G29360	0.766311	8.34148e-07	AT4G29330	-0.797796	1.64754e-07
AT5G48960	0.928093	1.2295e-15	AT5G48940	-4.86915	1.38229e-25
AT3G57810	1.40968	3.15679e-32	AT3G57800	3.34096	2.40216e-62
AT1G69310	-0.467089	0.0405557	AT1G69295	-0.292073	0.017694
AT5G16910	-1.59843	3.06877e-34	AT5G16890	-0.27367	0.0194181
AT5G40000	-4.37493	3.21287e-05	AT5G39990	-1.05556	5.96403e-11
AT5G60980	-0.854827	1.74126e-10	AT5G60940	0.776907	1.96657e-05
AT4G24330	-0.486701	3.12993e-08	AT4G24290	-0.46063	8.85537e-05
AT5G54040	-4.83936	7.57038e-16	AT5G54030	-5.4025	8.8408e-15
AT4G27070	-0.70011	6.39879e-07	AT4G27050	0.399128	4.38183e-05
AT3G12730	0.441881	0.0356504	AT3G12720	-4.87726	1.31957e-18
AT3G53260	-0.3424	0.0360838	AT3G53250	8.80242	7.72406e-10
AT2G01900	-3.92635	1.10627e-18	AT2G01890	-2.59313	7.37838e-11
AT3G14280	-4.19914	6.87323e-124	AT3G14270	-0.485713	1.21926e-08
AT5G49810	-0.875383	1.46525e-26	AT5G49770	-5.34104	1.27677e-56
AT2G17560	-0.566879	0.000275266	AT2G17550	1.1468	7.46635e-09
AT3G26490	1.04842	1.09032e-05	AT3G26440	-2.69014	4.53796e-76
AT5G43760	0.84385	2.15359e-06	AT5G43745	1.4153	4.33389e-07
AT5G16770	-4.74553	4.24712e-11	AT5G16760	-0.340615	0.0298957
AT5G40240	-0.989175	3.21734e-06	AT5G40210	-2.72593	1.19608e-05
AT4G33430	-0.874615	6.79272e-07	AT4G33420	-2.7973	2.72179e-15
AT4G02710	-1.90022	8.09205e-13	AT4G02700	1.25676	0.000204251
AT1G15310	-1.72742	7.9756e-36	AT1G15290	3.524	1.28436e-38
AT5G61380	-1.32574	2.50993e-24	AT5G61350	-4.22837	4.36595e-21
AT3G12730	0.441881	0.0356504	AT3G12700	-0.834223	2.24302e-11
AT1G54460	-0.269218	0.0262179	AT1G54450	-1.11861	5.19406e-05
AT2G44460	4.73021	9.40703e-08	AT2G44450	-2.51447	1.58371e-50
AT3G55160	-0.555484	0.0488099	AT3G55140	0.680702	9.58566e-12
AT1G05660	-5.88799	1.44146e-26	AT1G05650	-5.49726	1.01036e-09
AT3G48500	2.94827	2.97302e-40	AT3G48490	0.617376	0.0109979
AT2G47560	-1.39307	0.00179676	AT2G47540	-5.83808	1.63336e-43
AT5G05610	0.33297	0.003164	AT5G05600	-1.67962	2.31044e-05
AT3G62070	1.71226	2.57516e-17	AT3G62060	0.854474	6.46684e-06
AT3G11270	-0.51438	0.000100504	AT3G11260	-1.38418	1.53901e-05
AT3G22800	-5.53082	3.19026e-29	AT3G22790	-0.696747	2.43689e-05
AT2G40370	-5.17287	3.02265e-23	AT2G40360	-0.726777	0.00628139
AT1G31772	-5.05534	2.44938e-10	AT1G31770	-3.04001	1.3428e-38
AT2G17470	6.75138	4.15792e-12	AT2G17442	1.93596	2.08375e-07
AT1G23160	-4.25959	2.2225e-09	AT1G23130	8.16279	2.69431e-44
AT1G19800	0.997518	7.32786e-18	AT1G19790	-1.57659	1.47607e-06
AT5G49800	0.505224	0.00416778	AT5G49780	-3.87018	1.65165e-31
AT2G26480	-5.45832	4.22393e-33	AT2G26470	0.511916	0.000274812
AT1G33390	-0.363511	0.00646736	AT1G33360	-1.02379	2.82593e-06
AT1G28090	0.430167	0.00270282	AT1G28080	-2.77461	9.0745e-20
AT4G08300	-1.33001	0.00476308	AT4G08290	-1.16487	0.0137113
AT4G39900	1.35792	3.81112e-16	AT4G39890	-0.432984	0.0286656
AT3G11150	-2.65219	1.42561e-06	AT3G11130	-0.614051	5.378e-12
AT5G24230	-3.3866	1.37898e-16	AT5G24220	-5.49345	1.21854e-07
AT1G26390	-5.27638	1.20871e-31	AT1G26380	-2.36702	0.000635178
AT3G02110	2.31352	4.58224e-63	AT3G02090	-0.724574	3.03032e-09
AT1G18410	-2.23602	0.00330481	AT1G18390	-1.86191	3.94982e-10
AT2G20050	0.923022	5.10253e-13	AT2G20020	2.28554	1.29721e-40
AT1G51270	-3.19419	4.1509e-56	AT1G51260	-6.07622	3.0271e-09
AT5G63280	-0.470262	6.86641e-05	AT5G63260	-0.206892	0.0266722
AT2G37460	-0.710975	0.00428292	AT2G37450	2.84373	9.29637e-31
AT3G02250	1.49061	1.10073e-65	AT3G02230	-2.05964	9.47748e-66
AT5G47160	1.20323	0.00614279	AT5G47140	-1.32917	6.15216e-25
AT1G10760	1.75451	2.639e-21	AT1G10750	-1.01297	1.07734e-08
AT1G09910	0.411279	9.98878e-06	AT1G09900	1.84397	4.16672e-52
AT3G19290	0.289222	0.0110128	AT3G19280	-0.297257	0.0449588
AT5G51510	-0.596873	7.69547e-07	AT5G51490	-6.66429	1.76985e-23
AT2G27950	0.337087	0.0200915	AT2G27930	-0.869088	0.000295539
AT5G38830	-0.349425	0.00629975	AT5G38820	-4.30876	5.16417e-17
AT5G59270	-5.53064	9.03075e-20	AT5G59250	3.15704	3.81807e-134
AT3G27500	-1.77856	3.42695e-05	AT3G27490	-4.26866	2.91289e-12
AT1G80120	-2.09602	1.1138e-07	AT1G80110	-0.598727	0.021671
AT4G13040	0.712115	0.0172899	AT4G13030	-2.58997	5.47346e-82
AT4G20300	-0.558241	8.70633e-11	AT4G20270	-1.34245	3.38103e-05
AT1G15215	0.850384	0.00035097	AT1G15210	-5.23768	7.77927e-76
AT5G04710	1.0816	3.36464e-11	AT5G04690	2.14983	1.31352e-07
AT5G58760	-0.733799	0.0158209	AT5G58740	-0.284381	0.0401158
AT5G24530	-1.918	1.38027e-07	AT5G24520	0.816254	1.45796e-09
AT1G22230	-2.4081	8.31536e-13	AT1G22220	-3.55252	1.02471e-48
AT5G46270	1.61024	6.08951e-35	AT5G46260	-1.88013	3.04446e-08
AT5G24340	0.459265	0.000141988	AT5G24330	-0.985199	0.0117564
AT5G54690	-2.32864	5.53576e-13	AT5G54670	-1.03332	0.00158805
AT4G08170	0.381205	0.0331009	AT4G08160	-2.78935	3.40286e-33
AT1G53670	2.82278	4.40424e-52	AT1G53660	-4.06863	5.20676e-14
AT1G51880	-5.75359	8.00642e-38	AT1G51870	-4.99841	6.17323e-13
AT4G11600	-1.25583	6.52549e-13	AT4G11570	2.69174	1.20058e-29
AT4G33970	-0.867294	0.0353676	AT4G33950	0.927754	2.93098e-11
AT5G41360	-0.386503	0.024271	AT5G41340	0.33837	0.00122488
AT1G45332	-0.483711	0.0142096	AT1G45249	0.435764	0.0228568
AT2G43490	-0.716703	0.0014061	AT2G43480	-5.71806	4.67918e-18
AT4G37660	-0.4129	0.0121218	AT4G37650	-0.957016	1.59011e-05
AT5G40020	-2.78868	8.63907e-14	AT5G40010	-5.36772	7.6271e-15
AT1G11730	1.0489	0.00318306	AT1G11720	2.93228	4.4938e-42
AT5G14930	0.567881	0.0166933	AT5G14920	3.8262	1.77789e-12
AT2G40400	2.06999	3.38893e-93	AT2G40390	-2.5419	6.7537e-26
AT1G09570	0.53531	3.98595e-05	AT1G09540	-4.4761	3.18057e-58
AT5G65800	-3.74074	1.06857e-12	AT5G65790	-5.16567	1.76259e-73
AT5G03900	1.761	9.44012e-68	AT5G03890	-2.42709	3.15292e-15
AT1G52070	-5.26387	1.55272e-08	AT1G52050	-5.23971	1.08553e-22
AT5G18560	-4.9509	1.457e-14	AT5G18540	-0.59429	2.25025e-05
AT4G39410	1.06072	0.000599516	AT4G39400	0.774685	5.72868e-10
AT1G64670	2.82935	2.16835e-10	AT1G64660	-1.45773	0.00873002
AT5G48110	-4.69999	1.02006e-58	AT5G48060	-0.535903	0.0163808
AT1G74850	2.73172	2.88729e-116	AT1G74840	-1.47391	3.02667e-24
AT3G24760	-0.539058	0.000175898	AT3G24750	-6.94344	6.35882e-21
AT4G15396	-5.45144	1.50194e-14	AT4G15393	-5.97422	7.66557e-20
AT5G42440	-1.31183	0.00191658	AT5G42420	-0.712983	1.86102e-07
AT4G01480	-3.69911	3.69337e-47	AT4G01460	5.94658	1.49379e-76
AT2G39290	1.11986	8.04698e-28	AT2G39280	0.493718	0.0433228
AT5G23950	-4.04296	2.91426e-11	AT5G23940	3.5579	4.63523e-49
AT2G32960	-1.01007	5.77958e-11	AT2G32950	0.434338	0.0199948
AT2G19160	-0.761235	0.000130892	AT2G19130	-1.80103	1.25642e-07
AT5G57100	-0.589593	0.000894716	AT5G57090	-4.69481	8.38865e-23
AT3G51470	0.8766	7.1046e-07	AT3G51460	-0.733088	4.68008e-14
AT4G32010	-0.221957	0.00978771	AT4G32000	0.720092	1.7968e-07
AT5G25010	-1.95167	1.36463e-17	AT5G24990	-0.648656	0.0143183
AT4G11320	-4.71419	2.35464e-17	AT4G11290	-3.0148	2.08594e-25
AT2G28520	-0.492179	9.75829e-13	AT2G28510	-1.30587	1.01582e-10
AT5G20840	0.720354	1.61519e-15	AT5G20830	-3.27514	1.46446e-17
AT1G68945	1.14866	0.0140601	AT1G68920	-0.386402	0.00552534
AT3G63210	-1.4932	9.12101e-09	AT3G63190	3.52992	1.01719e-194
AT4G00760	1.31951	3.61886e-09	AT4G00755	0.809251	1.25164e-13
AT2G01900	-3.92635	1.10627e-18	AT2G01890	-2.59313	7.37838e-11
AT5G15120	-2.81949	0.000134818	AT5G15080	-0.277703	0.0283179
AT5G19400	-0.29501	9.82105e-05	AT5G19390	0.999707	5.54888e-23
AT5G10290	-0.590561	0.000258816	AT5G10278	-4.4762	1.18183e-18
AT5G17310	1.4932	9.96239e-46	AT5G17290	0.425161	0.00108694
AT3G12710	1.14062	7.24754e-17	AT3G12700	-0.834223	2.24302e-11
AT1G33770	4.22767	5.01841e-22	AT1G33750	-5.24696	1.27186e-11
AT5G14350	1.8868	4.91918e-11	AT5G14340	-5.52586	6.25709e-11
AT1G71810	1.98824	3.14577e-23	AT1G71800	-0.542079	2.15038e-06
AT1G55740	-3.42381	4.94285e-111	AT1G55730	-1.48068	7.13525e-25
AT1G59660	-0.790388	1.35296e-06	AT1G59650	-0.441255	0.00178483
AT4G13150	1.52365	5.6135e-35	AT4G13130	-4.17685	7.5889e-31
AT5G20820	-3.66765	7.65988e-07	AT5G20810	-2.10954	2.23689e-07
AT4G22900	-1.02619	0.000640491	AT4G22890	5.05222	8.63454e-168
AT3G59010	4.57719	8.77304e-18	AT3G58980	0.909411	1.85427e-05
AT3G19170	2.8486	2.65422e-83	AT3G19130	-0.831692	4.19001e-08
AT5G42680	4.68037	8.37629e-37	AT5G42670	0.695038	4.64675e-07
AT4G33630	1.05176	2.3385e-39	AT4G33620	-0.568889	7.76035e-05
AT5G05980	-0.490109	0.000154005	AT5G05970	0.420747	0.0154945
AT2G36720	0.416062	0.0126282	AT2G36710	-2.35252	1.90088e-05
AT2G41130	-1.31334	4.5168e-11	AT2G41070	-1.24965	2.23954e-05
AT1G23100	-1.41607	1.01522e-16	AT1G23090	4.26765	9.09014e-41
AT1G77610	-0.498944	0.00396328	AT1G77600	0.700969	0.00672644
AT1G11170	-0.592281	0.0153742	AT1G11160	-1.63775	5.25965e-05
AT5G54040	-4.83936	7.57038e-16	AT5G53970	2.62237	6.71501e-53
AT5G13690	1.15999	1.26979e-16	AT5G13680	-0.287357	0.0126928
AT1G23540	-2.28582	0.000183987	AT1G23480	0.817239	2.96555e-07
AT4G14990	-0.693728	5.44823e-07	AT4G14980	-4.77159	3.916e-11
AT3G03660	-3.93615	3.91747e-06	AT3G03650	-5.38688	4.44707e-21
AT3G63200	-1.95656	7.05159e-38	AT3G63190	3.52992	1.01719e-194
AT3G03950	0.351818	3.60331e-05	AT3G03940	0.386762	0.0186527
AT1G17050	1.3197	3.08952e-12	AT1G17040	0.479019	0.00860715
AT4G14290	-1.79906	1.27084e-22	AT4G14280	-6.10704	1.9505e-10
AT5G59540	1.3317	1.56975e-07	AT5G59530	-5.43815	1.02657e-32
AT3G60160	2.29477	7.38615e-06	AT3G60140	-2.57645	0.00222271
AT4G13345	1.87163	6.64443e-21	AT4G13310	-5.84363	7.15378e-18
AT2G47450	5.09777	0	AT2G47440	1.45012	5.13548e-09
AT5G51070	1.25446	2.5338e-17	AT5G51060	-5.6609	5.98153e-31
AT5G07700	5.3448	4.51175e-15	AT5G07680	-3.57458	5.04075e-28
AT2G26260	-0.351121	0.0125727	AT2G26250	3.47375	5.12111e-52
AT4G20240	-3.87189	8.99156e-73	AT4G20230	-2.6083	1.37776e-21
AT4G32650	-2.74201	4.48574e-33	AT4G32640	-0.30713	0.015696
AT4G26910	-0.878243	1.09608e-08	AT4G26890	-1.47534	0.00461232
AT5G22510	1.88703	1.1941e-66	AT5G22500	0.567612	3.94229e-06
AT1G29310	-0.772989	3.37343e-08	AT1G29300	-2.69048	1.03067e-10
AT2G47890	-1.55208	1.53623e-33	AT2G47860	-2.31206	1.9376e-39
AT5G03650	2.64109	1.9978e-100	AT5G03640	-2.8078	3.60336e-20
AT3G49970	7.56746	4.13483e-12	AT3G49950	4.56924	3.17613e-14
AT3G54680	-1.1504	9.69202e-13	AT3G54670	-0.236402	0.031151
AT1G14380	0.351979	0.0072542	AT1G14370	-0.855526	0.00451289
AT1G78850	-1.05605	0.017331	AT1G78820	7.243	6.03132e-262
AT5G57350	2.04097	1.68281e-48	AT5G57320	1.07989	0.00194725
AT1G79620	-0.974573	1.25866e-08	AT1G79610	-1.06253	5.75707e-07
AT5G49900	-2.30039	7.20819e-16	AT5G49890	-0.657928	0.000668375
AT4G15150	-4.57049	1.52046e-24	AT4G15120	-3.82143	5.06564e-23
AT2G22560	-2.2768	1.22022e-45	AT2G22540	1.74374	2.69189e-26
AT4G21410	-0.742888	0.0116727	AT4G21400	-0.667434	0.00545485
AT3G49690	-4.28882	7.85893e-21	AT3G49680	1.57399	1.02379e-19
AT3G27906	0.569325	1.05351e-07	AT3G27884	-5.65902	1.28356e-13
AT4G13660	-4.13912	3.26396e-33	AT4G13630	-0.278192	0.030324
AT5G18910	-4.19181	6.03444e-13	AT5G18860	-2.57509	3.08192e-70
AT1G22650	3.34537	1.6655e-84	AT1G22630	5.66349	2.25878e-225
AT5G36880	-0.710667	2.36054e-09	AT5G36870	-4.26854	3.0551e-69
AT1G58420	1.08326	0.0433754	AT1G58410	-2.73487	1.21556e-19
AT2G01590	4.92803	2.95671e-54	AT2G01580	-5.26382	5.23756e-17
AT5G45290	-0.421688	0.0120291	AT5G45280	-1.26396	1.2343e-07
AT5G04720	-0.394925	0.0260981	AT5G04710	1.0816	3.36464e-11
AT1G75460	7.14775	1.7456e-238	AT1G75450	-1.5732	5.50774e-08
AT1G35350	2.34229	7.01478e-17	AT1G35340	3.01565	1.30008e-84
AT5G20870	-0.853681	0.0294228	AT5G20850	0.539077	0.00619301
AT4G30150	-0.649331	0.000147113	AT4G30140	1.14038	0.0321303
AT3G45710	-4.33615	1.87894e-21	AT3G45700	-5.71541	9.24875e-35
AT1G09170	-2.92254	1.65511e-09	AT1G09160	0.779624	4.60017e-10
AT5G56460	-1.28643	8.58577e-06	AT5G56450	0.655662	0.00323779
AT5G36930	1.7107	2.26619e-36	AT5G36910	7.72143	3.06485e-44
AT5G38020	-4.273	1.10556e-16	AT5G38000	-2.57285	0.00620718
AT5G51670	-1.23255	4.00425e-05	AT5G51660	0.534489	0.0010155
AT2G40570	0.369477	0.0467379	AT2G40540	1.22262	3.75512e-15
AT1G33290	1.67976	2.09849e-32	AT1G33270	0.607031	0.000824198
AT5G65790	-5.16567	1.76259e-73	AT5G65750	-0.543527	1.16651e-07
AT4G32960	0.500036	0.000314483	AT4G32950	5.36034	1.08971e-12
AT2G16940	0.703394	1.05265e-05	AT2G16920	-0.470267	1.23601e-08
AT5G42480	1.69489	5.00729e-42	AT5G42440	-1.31183	0.00191658
AT1G55290	-4.60659	1.2714e-09	AT1G55260	3.83115	1.76985e-23
AT1G74690	0.445271	0.0498218	AT1G74660	-2.38897	6.19478e-15
AT4G24040	2.10816	1.32409e-31	AT4G24020	0.792053	1.80389e-16
AT1G21140	-2.31744	2.16163e-07	AT1G21130	2.36096	2.32607e-07
AT2G02955	-0.501752	0.00679495	AT2G02930	-3.49288	2.19996e-13
AT5G16900	-5.96416	2.92687e-32	AT5G16890	-0.27367	0.0194181
AT2G21390	-0.441965	2.19988e-05	AT2G21385	3.27116	7.83266e-155
AT3G09270	-4.29387	8.52294e-86	AT3G09260	-3.32344	4.0473e-12
AT3G55550	-4.80024	8.88246e-06	AT3G55500	4.4658	6.08973e-26
AT5G47140	-1.32917	6.15216e-25	AT5G47110	3.31299	2.13042e-228
AT1G66280	-5.95777	6.66448e-28	AT1G66270	-5.78626	5.8273e-25
AT3G47790	-5.48692	5.99025e-40	AT3G47770	-4.89837	6.97538e-07
AT1G63750	2.68573	2.21562e-34	AT1G63740	-0.361071	0.0109972
AT5G23210	0.902356	0.00535087	AT5G23170	-1.16519	1.69619e-05
AT5G12930	-0.891937	5.67098e-08	AT5G12900	0.428993	0.000121086
AT2G16990	-1.8623	2.48068e-12	AT2G16970	-6.11387	1.26985e-31
AT1G13130	-3.06123	5.1506e-32	AT1G13100	0.961957	0.00474544
AT4G01770	-4.8005	2.56623e-21	AT4G01750	-2.48503	8.62473e-12
AT1G08350	-0.887673	1.87305e-10	AT1G08320	-4.66741	6.36294e-52
AT2G40400	2.06999	3.38893e-93	AT2G40370	-5.17287	3.02265e-23
AT1G50410	-0.383668	0.0157065	AT1G50380	-0.335948	0.00098146
AT5G10625	-3.13486	6.18451e-09	AT5G10620	2.08761	1.72049e-16
AT1G45015	-6.69312	5.98914e-18	AT1G45010	4.69441	6.90763e-35
AT5G51070	1.25446	2.5338e-17	AT5G51060	-5.6609	5.98153e-31
AT1G02530	-2.20357	0.0024864	AT1G02520	-4.92664	2.57534e-65
AT4G35390	-4.28803	1.81072e-50	AT4G35380	-4.7898	3.28502e-89
AT1G10510	1.51311	1.14046e-39	AT1G10480	-4.7086	4.53585e-11
AT4G25340	-0.77413	0.0407093	AT4G25320	-0.972846	2.01542e-31
AT1G21660	-0.186523	0.0310326	AT1G21640	1.43177	1.17479e-64
AT5G19550	-1.07897	2.78593e-05	AT5G19520	-5.14117	6.04969e-19
AT1G75520	-0.627201	0.0179064	AT1G75510	-0.272323	0.0347174
AT5G12940	-1.55069	1.40546e-09	AT5G12930	-0.891937	5.67098e-08
AT1G61570	-0.718667	1.94653e-08	AT1G61560	-4.43037	2.98192e-47
AT5G17310	1.4932	9.96239e-46	AT5G17300	2.43154	1.37737e-07
AT5G61550	-5.00928	7.82033e-51	AT5G61540	0.704276	1.52365e-05
AT1G70510	1.49626	8.67843e-05	AT1G70505	1.55998	1.20531e-08
AT3G08490	-2.59916	1.86483e-12	AT3G08040	-3.60741	1.1808e-63
AT2G26370	-4.92685	3.4454e-12	AT2G26360	-2.38383	5.5019e-32
AT2G32960	-1.01007	5.77958e-11	AT2G32950	0.434338	0.0199948
AT4G39800	2.15843	4.48131e-28	AT4G39795	-2.49294	3.91452e-10
AT5G45960	3.24867	2.6226e-11	AT5G45950	6.58492	5.25387e-128
AT5G05980	-0.490109	0.000154005	AT5G05970	0.420747	0.0154945
AT1G71040	1.33717	3.99181e-16	AT1G71010	-1.24275	1.01259e-11
AT3G48090	-0.286353	0.0265421	AT3G48070	0.754383	4.5616e-06
AT5G19550	-1.07897	2.78593e-05	AT5G19540	2.11386	1.25675e-48
AT1G27680	0.914654	3.29408e-05	AT1G27660	-0.573323	2.63718e-05
AT1G17600	0.989697	0.00304197	AT1G17580	0.699362	2.07614e-05
AT5G49665	-0.762201	6.67594e-06	AT5G49660	-0.416618	0.0159297
AT2G01210	-0.780532	4.03394e-06	AT2G01190	-0.881761	0.00655093
AT3G21650	0.830714	5.93391e-12	AT3G21630	-0.8601	0.000901218
AT5G17230	4.69416	1.09979e-248	AT5G17210	-1.40992	4.3112e-16
AT1G14840	3.16594	1.73941e-29	AT1G14830	-0.481527	2.18297e-06
AT2G28830	0.821541	1.36249e-07	AT2G28810	-0.663416	0.0254246
AT4G25350	-1.30388	6.24404e-06	AT4G25340	-0.77413	0.0407093
AT1G66020	-4.28271	6.30799e-15	AT1G65985	-2.07679	3.4084e-16
AT3G44700	-2.52141	5.84738e-06	AT3G44690	-0.689279	0.00142869
AT5G48580	-0.922516	1.90732e-13	AT5G48560	-4.21538	2.33589e-59
AT2G42600	3.50497	1.44583e-57	AT2G42570	-2.47916	9.57893e-72
AT5G23030	-5.40231	3.04129e-22	AT5G23020	-1.93041	5.24465e-06
AT5G19560	-4.84814	3.02364e-11	AT5G19550	-1.07897	2.78593e-05
AT5G46570	0.482546	0.019857	AT5G46560	-0.245557	0.0201156
AT5G49810	-0.875383	1.46525e-26	AT5G49770	-5.34104	1.27677e-56
AT3G27380	-0.992208	1.01177e-19	AT3G27350	-0.264373	0.0451139
AT4G38340	-1.12468	0.000511153	AT4G38330	1.42468	7.5891e-07
AT3G08500	-0.766168	0.0384742	AT3G08040	-3.60741	1.1808e-63
AT4G19710	1.04694	6.06793e-08	AT4G19670	-0.629771	0.00125337
AT1G61250	-0.768234	0.0032043	AT1G61240	0.315752	0.00466574
AT2G35612	-5.17011	3.1427e-10	AT2G35610	-1.72839	3.28583e-61
AT3G10770	0.449022	0.00103502	AT3G10760	0.243413	0.0260981
AT3G11180	-2.73108	0.00293878	AT3G11150	-2.65219	1.42561e-06
AT2G34150	-1.20955	0.000173784	AT2G34140	-3.22708	1.18173e-19
AT1G73640	-1.73659	4.77503e-09	AT1G73630	-1.35663	0.00255841
AT3G57130	3.03883	2.19547e-10	AT3G57080	0.500243	1.62303e-05
AT1G61430	0.528589	0.00571754	AT1G61390	-1.49544	0.000163176
AT5G47050	-2.36004	4.37753e-11	AT5G47040	1.09677	5.45294e-16
AT4G28550	-1.14177	1.54423e-20	AT4G28530	-2.95543	1.24791e-14
AT1G14860	-3.49771	8.73916e-34	AT1G14850	-0.443447	2.73626e-05
AT1G16680	0.37935	0.011425	AT1G16670	-0.959408	0.000571219
AT2G02620	-6.10067	3.57101e-12	AT2G02610	-6.02036	8.14254e-34
AT2G01220	0.385293	0.000518514	AT2G01210	-0.780532	4.03394e-06
AT1G24430	-5.40194	3.51897e-19	AT1G24405	-1.89413	0.000175864
AT3G53180	-0.818792	1.46299e-18	AT3G53170	2.117	1.307e-19
AT4G38910	0.932884	2.00207e-08	AT4G38900	0.697734	5.08653e-05
AT1G22960	-0.576599	0.00107058	AT1G22910	0.303817	0.0254596
AT3G21770	-4.66707	1.78877e-63	AT3G21700	-0.691795	0.00633114
AT4G23430	-0.969221	0.00220349	AT4G23420	-3.36991	1.53149e-23
AT1G17180	-4.63869	8.04792e-12	AT1G17170	-2.68236	6.74966e-09
AT1G15100	-1.84635	1.90809e-16	AT1G15060	0.823155	8.86624e-12
AT2G24290	0.359171	0.000448441	AT2G24270	5.75371	3.52657e-46
AT2G37440	-4.73346	2.85975e-42	AT2G37420	0.713575	0.00681375
AT4G33350	2.12551	7.78672e-68	AT4G33330	-2.48724	5.2568e-12
AT5G15490	-1.42085	2.21171e-28	AT5G15470	-0.754321	1.30284e-08
AT1G62430	0.586409	0.00947312	AT1G62422	-0.836745	0.0270828
AT2G22680	-2.39969	4.89047e-21	AT2G22670	1.17303	1.93422e-23
AT1G24405	-1.89413	0.000175864	AT1G24400	5.83633	1.09483e-61
AT1G54030	-1.06839	3.98844e-09	AT1G54000	-5.58652	2.25931e-43
AT4G19390	1.43769	5.6715e-05	AT4G19350	0.720594	7.47093e-14
AT3G02260	-0.495919	0.0385927	AT3G02250	1.49061	1.10073e-65
AT4G04040	1.46061	3.9768e-29	AT4G04020	2.77446	2.40883e-67
AT1G53060	1.67642	2.74852e-12	AT1G53035	-1.24762	4.492e-05
AT1G17600	0.989697	0.00304197	AT1G17580	0.699362	2.07614e-05
AT4G14980	-4.77159	3.916e-11	AT4G14970	0.873577	0.0126145
AT1G16540	-0.610506	0.02198	AT1G16520	-0.315605	0.0144909
AT3G49390	-0.739972	4.25522e-19	AT3G49360	0.449307	0.0112477
AT1G55430	-5.05875	1.87421e-35	AT1G55420	-4.58703	4.29336e-41
AT2G39580	0.688292	0.000352431	AT2G39530	-5.60022	2.98983e-44
AT3G08770	2.96448	8.78477e-07	AT3G08710	-0.718471	0.0010161
AT3G22400	-1.5917	1.08638e-36	AT3G22380	0.268321	0.0194507
AT3G22600	-4.58832	6.1147e-76	AT3G22540	-2.86042	4.83274e-11
AT4G15670	7.10002	2.4552e-29	AT4G15660	6.15565	4.58939e-30
AT3G48450	-5.08402	7.30269e-27	AT3G48440	1.2867	2.05229e-06
AT5G35450	-1.22962	6.76294e-34	AT5G35430	-0.358746	0.000474964
AT2G17470	6.75138	4.15792e-12	AT2G17430	-2.62464	6.29441e-39
AT1G64940	-2.65618	1.84335e-06	AT1G64930	-5.42571	4.24899e-14
AT5G10540	-0.307001	0.000129896	AT5G10510	-2.4108	1.77891e-08
AT4G03510	1.22523	1.47744e-33	AT4G03480	-5.23465	5.18576e-10
AT1G73620	-1.69815	1.06155e-05	AT1G73570	1.46631	4.72425e-09
AT4G14640	-2.6017	3.3642e-12	AT4G14605	1.75593	1.50506e-21
AT5G59340	3.53951	1.54432e-16	AT5G59260	-3.61271	3.72076e-11
AT5G42750	1.13584	5.42891e-05	AT5G42720	1.10848	1.40509e-08
AT3G45160	-1.44388	0.000290327	AT3G45130	-1.97418	1.56025e-08
AT3G02120	0.6146	2.45203e-06	AT3G02110	2.31352	4.58224e-63
AT5G19350	0.457808	1.61841e-06	AT5G19310	0.857012	0.00353401
AT5G17330	-4.85033	3.84803e-61	AT5G17300	2.43154	1.37737e-07
AT1G51190	-4.76997	3.53277e-11	AT1G51170	-1.36364	7.58095e-07
AT2G27920	-0.785288	0.000865836	AT2G27860	0.433628	0.0425473
AT2G19170	0.589019	0.0207466	AT2G19130	-1.80103	1.25642e-07
AT5G52330	-4.08147	1.37807e-31	AT5G52290	1.58518	9.60613e-05
AT3G17700	0.959602	0.000320487	AT3G17630	-0.628707	0.00586125
AT5G41360	-0.386503	0.024271	AT5G41315	-3.55083	4.984e-16
AT1G55300	0.822932	5.08919e-08	AT1G55240	-5.92461	1.20281e-16
AT3G61740	0.727848	6.50071e-05	AT3G61710	0.230626	0.0288108
AT1G56690	-0.563988	0.0334421	AT1G56630	-5.61556	3.13815e-23
AT2G31880	1.23423	1.12582e-06	AT2G31810	0.873385	0.000608952
AT5G24060	1.64676	3.01079e-41	AT5G24040	-5.04076	2.30705e-10
AT5G63520	1.42694	5.80262e-27	AT5G63510	-0.430422	5.88225e-07
AT4G35160	-4.01068	3.32828e-19	AT4G35080	-0.985673	5.00065e-21
[truncated: 2 more rows]
