# Supplementary material for: Polycomb-dependent differential chromatin compartmentalization determines gene coregulation in Arabidopsis
Source: HighWire-hosted journal article supplement (doi:10.1101/gr.273771.120), 2021-06-03
Supplement: Supplemental_Table_S9.xlsx [file Supplemental_Table_S9.xlsx]

## Sheet: S9
Supplementary Table S9: HiChIP Root Top2K Interactions
start.1.	end.1.	geneIDs.1	Marked_H3K27me3	Gene_chr	Gene_start.1.	Gene_end.1.	Shoot_1_H3K27me3	Root_1_H3K27me3	start.2.	end.2.	geneIDs.2	Gene_chr	Gene_start.2.	Gene_end.2.	Shoot_2_H3K27me3	Root_2_H3K27me3	Marked_H3K27me3	Z.score	InteractionID	PeakID.1.	strand.1.	Total.Reads.1.	PeakID.2.	strand.2.	Total.Reads.2.	Distance	Interaction.Reads	.1pected.Reads	LogP	FDR.Benjamini..based.on.1.77e.09.total.tests.	Bg.Interaction.Reads	Bg..1pected.Reads	Bg.Z.score	Bg.LogP	Bg.Total.Reads.Peak1	Bg.Total.Reads.Peak2	LogP.vs..Bg	Z.score.Difference.vs..Bg	Z.score.Difference.vs..Bg	Circos.Thickness	RNAseq_log2FoldChange.1	padj.1	RNAseq_log2FoldChange.2	padj.2
18850000	18852000	AT5G46490	yes	Chr5	18850775	18853843	0.842107	1.14427	18846000	18848000	AT5G46470	Chr5	18842700	18849741	0.82341	0.673445	NA	3700	interaction384605	5-18850000	+	497	5-18846000	+	1215	4371	37	0.069862	-101.606512	0	10	0.069862	1000	-16.070952	600	1486	-23.0816	2700	2700	-38	4.23768	5.82437180675689e-44	0.726949	0.00168750164222977
8360000	8362000	AT4G14560	yes	Chr4	8361057	8361986	3.01341	2.18297	8350000	8352000	AT4G14550	Chr4	8347821	8350019	1.8855	1.25109	yes	1700	interaction285025	4-8360000	+	1055	4-8350000	+	290	10023	17	0.069862	-34.872464	0	2	0.069862	200	-1.330894	1713	595	-21.6134	1500	1500	-12	1.9175	1.41943416515898e-06	0.787842	0.000193862916595207
16282000	16284000	AT2G38995	yes	Chr2	16282119	16284868	1.76272	2.22157	16272000	16274000	AT2G38970	Chr2	16273900	16276872	0.686257	0.618438	yes	1700	interaction159744	2-16282000	+	944	2-16272000	+	768	9880	17	0.069862	-34.606185	0	2	0.069862	200	-1.330893	1450	1214	-21.5334	1500	1500	-12	6.80407	3.82457087055521e-33	0.545547	8.14713739951192e-05
16008000	16010000	AT3G44330	NA	Chr3	16006674	16010965	0.830944	0.757004	15988000	15990000	AT3G44310	Chr3	15986863	15989103	1.07014	1.27745	yes	1700	interaction228773	3-16008000	+	1238	3-15988000	+	855	19993	17	0.069862	-34.589981	0	2	0.069862	200	-1.330893	2003	1354	-21.5255	1500	1500	-12	-0.691477	4.07613801952777e-12	2.30503	1.52565802706459e-25
12182000	12184000	AT4G23300	NA	Chr4	12181931	12184704	0.685613	0.572396	12148000	12150000	AT4G23210	Chr4	12148713	12151479	0.534039	0.533519	NA	1200	interaction297984	4-12182000	+	1244	4-12148000	+	1757	33349	12	0.069862	-20.952361	7e-06	1	0.069862	100	-0.458488	1552	2243	-18.4452	1100	1100	-6	8.62841	8.92301190476683e-122	8.36994	1.67704854281403e-21
9510000	9512000	AT4G16900	NA	Chr4	9511858	9516541	0.627999	0.562104	9504000	9506000	AT4G16890	Chr4	9500505	9505455	0.596102	0.578236	NA	6600	interaction289124	4-9510000	+	2647	4-9504000	+	854	6165	66	0.069862	-217.020124	0	31	0.069862	3100	-79.557545	3010	887	-17.1901	3500	3500	-80	1.16585	7.73801154939317e-22	2.55938	2.02741479868906e-44
3868000	3870000	AT1G11490	NA	Chr1	3868883	3870065	0.763768	0.790354	3842000	3844000	AT1G11410	Chr1	3841285	3844432	0.521196	0.5498	NA	2483.41905	interaction13815	1-3868000	+	2093	1-3842000	+	1825	25526	28	0.078768	-69.048321	0	14	0.13138	744.457141	-26.147833	3372	3106	-16.3491	1738.961909	1738.96	-24	-2.32697	3.07386729699305e-05	2.69295	5.91415232123747e-51
12590000	12592000	AT2G29310	yes	Chr2	12590057	12591363	1.00334	1.51886	12508000	12510000	AT2G29110	Chr2	12506879	12510552	2.10031	2.2937	yes	1100	interaction146480	2-12590000	+	1097	2-12508000	+	2632	81659	11	0.069862	-18.457461	7.4e-05	1	0.069862	100	-0.458447	1274	3892	-16.0386	1000	1000	-6	4.53301	1.98735506102343e-59	-2.08381	0.0123179555707828
9506000	9508000	AT4G16892	NA	Chr4	9506321	9508337	0.577603	0.599978	9502000	9504000	AT4G16890	Chr4	9500505	9505455	0.596102	0.578236	NA	4700	interaction289097	4-9506000	+	1131	4-9502000	+	1125	4419	47	0.069862	-138.715605	0	20	0.069862	2000	-43.426801	1233	1260	-14.8822	2700	2700	-52	2.88438	6.73194512868525e-12	2.55938	2.02741479868906e-44
19996000	19998000	AT5G49320	yes	Chr5	19995024	19996314	3.2045	3.80754	19972000	19974000	AT5G49270	Chr5	19971908	19974444	2.20091	2.41651	yes	1600	interaction388342	5-19996000	+	969	5-19972000	+	1651	23787	16	0.069862	-31.720915	0	3	0.069862	300	-2.522789	1397	2840	-14.2638	1300	1300	-10	-1.13145	0.000407757544885185	-5.69228	1.26009629022159e-77
28192000	28194000	AT1G75100	NA	Chr1	28190815	28193800	0.690992	0.63156	28174000	28176000	AT1G75030	Chr1	28174377	28175383	0.70289	0.687648	NA	1800	interaction95228	1-28192000	+	867	1-28174000	+	1121	17431	18	0.069862	-37.500092	0	4	0.069862	400	-3.966117	1485	1732	-13.7447	1400	1400	-14	4.79109	1.63223266379802e-147	-2.558	6.44568988494705e-08
3228000	3230000	AT1G09930	yes	Chr1	3227489	3230043	2.08826	1.66754	3220000	3222000	AT1G09910	Chr1	3220034	3224541	0.723316	0.677128	NA	5910.324397	interaction11520	1-3228000	+	2657	1-3220000	+	1467	7852	68	0.080378	-224.473699	0	61	0.135385	3147.748378	-194.562249	5067	2130	-13.679	2762.576019	2762.58	-84	-3.24334	0.000662543924739576	0.411279	9.98878235587565e-06
6408000	6410000	AT4G10340	NA	Chr4	6408015	6409677	0.925841	0.770422	6406000	6408000	AT4G10330	Chr4	6406540	6407777	0.768854	0.705793	NA	15900	interaction278622	4-6408000	+	1529	4-6406000	+	1098	1779	159	0.069862	-663.293793	0	108	0.069862	10800	-405.599526	2301	1579	-13.3262	5100	5100	-248	7.13729	4.51128752337501e-195	0.393418	0.0175821838535251
17134000	17136000	AT3G46540	NA	Chr3	17134090	17135587	0.732685	1.18202	17132000	17134000	AT3G46530	Chr3	17130366	17133338	0.760265	1.17283	yes	9300	interaction233174	3-17134000	+	1042	3-17132000	+	1098	2009	93	0.069862	-336.852078	0	55	0.069862	5500	-170.572841	1152	1315	-13.2715	3800	3800	-126	2.06563	1.49190453383537e-55	3.04631	3.50967758041196e-23
9506000	9508000	AT4G16892	NA	Chr4	9506321	9508337	0.577603	0.599978	9504000	9506000	AT4G16890	Chr4	9500505	9505455	0.596102	0.578236	NA	4700	interaction289098	4-9506000	+	1131	4-9504000	+	854	2749	47	0.069862	-139.017772	0	22	0.069862	2200	-49.666196	1233	887	-12.4809	2500	2500	-52	2.88438	6.73194512868525e-12	2.55938	2.02741479868906e-44
17076000	17078000	AT3G46400	yes	Chr3	17073195	17077328	1.57079	2.20451	17024000	17026000	AT3G46330	Chr3	17020746	17025011	1.86259	2.64542	yes	1700	interaction232844	3-17076000	+	1562	3-17024000	+	1667	51912	17	0.069862	-34.525505	0	4	0.069862	400	-3.965595	1953	2606	-12.2625	1300	1300	-12	-5.59772	2.67519618637992e-12	-6.21046	3.45338698747857e-31
26710000	26712000	AT1G70830	yes	Chr1	26709946	26711462	3.19402	4.36885	26706000	26708000	AT1G70820	Chr1	26705517	26708264	0.894686	0.938852	yes	16875.111004	interaction89958	1-26710000	+	2603	1-26706000	+	2013	3694	261	0.108053	-1213.54214	0	306	0.166106	12869.947915	-1466.619243	4524	2927	-12.1696	4005.163089	4005.16	-454	2.86715	4.82949705951616e-06	7.33724	3.30083904715404e-150
26136000	26138000	AT5G65410	yes	Chr5	26136093	26137183	1.40302	6.54438	26132000	26134000	AT5G65400	Chr5	26131425	26133259	0.724734	1.92147	yes	7400	interaction408312	5-26136000	+	1038	5-26132000	+	1037	4367	74	0.069862	-251.157977	0	42	0.069862	4200	-119.434133	1211	1286	-12.018	3200	3200	-94	6.93044	1.83509737079729e-102	1.68375	3.64207860650037e-15
24578000	24580000	AT1G66020	yes	Chr1	24577552	24580185	2.60888	2.90935	24444000	24446000	AT1G65730	Chr1	24442503	24446291	2.31589	2.71992	yes	778.944843	interaction83031	1-24578000	+	1476	1-24444000	+	2652	133164	9	0.080719	-13.716821	0.007132	2	0.137142	101.882891	-1.330893	2825	3870	-11.9468	677.061952	677.062	-4	-4.28271	6.30799180986181e-15	-2.97413	9.28649100536923e-27
12712000	12714000	AT2G29760	NA	Chr2	12712883	12715852	0.755332	0.805679	12694000	12696000	AT2G29690	Chr2	12693870	12696975	0.705327	0.670495	NA	900	interaction147008	2-12712000	+	944	2-12694000	+	1346	17879	9	0.069862	-13.727723	0.007132	1	0.069862	100	-0.458495	1613	1942	-11.5016	800	800	-4	0.611069	0.000781117234182585	1.05712	1.310796696904e-07
14256000	14258000	AT5G36220	yes	Chr5	14253689	14256033	1.04694	2.19786	14196000	14198000	AT5G36110	Chr5	14195376	14197613	2.95034	3.42681	yes	900	interaction370150	5-14256000	+	1740	5-14196000	+	1409	60379	9	0.069862	-13.71774	0.007132	1	0.069862	100	-0.458511	2294	1768	-11.5004	800	800	-4	1.44412	1.89293765254528e-19	-5.88774	2.25079634357272e-10
1532000	1534000	AT5G05170	NA	Chr5	1530173	1535414	0.796877	0.846668	1528000	1530000	AT5G05160	Chr5	1527974	1530062	0.736879	0.762244	yes	15917.8035	interaction325276	5-1532000	+	1778	5-1528000	+	2023	3991	169	0.074173	-710.586277	0	202	0.123879	11391.896643	-882.521399	2685	3678	-11.4683	4525.906856	4525.91	-266	-0.24413	0.0274703039420324	-1.88851	2.47469178935531e-20
312000	314000	AT3G01900	yes	Chr3	312358	313849	3.43733	3.41898	294000	296000	AT3G01820	Chr3	293753	295458	0.705725	0.686776	NA	1200	interaction172141	3-312000	+	1565	3-294000	+	1171	18319	12	0.069862	-20.955158	7e-06	3	0.085749	244.417807	-2.522574	3613	1892	-11.3181	955.582193	955.582	-6	-5.31644	9.40212091314279e-16	-0.560473	3.09057894235261e-07
3570000	3572000	AT3G11390	yes	Chr3	3569827	3571960	1.96134	3.00245	3566000	3568000	AT3G11385	Chr3	3566577	3568878	1.32746	1.95587	yes	12470.63117	interaction183623	3-3570000	+	2221	3-3566000	+	2006	3509	164	0.091875	-683.612159	0	292	0.229568	8886.11229	-1380.630298	4347	4210	-11.3018	3584.51888	3584.52	-256	-2.11196	7.47385255465368e-05	-6.55376	6.75041685557771e-20
10722000	10724000	AT2G25170	NA	Chr2	10713806	10723986	0.814607	0.731178	10698000	10700000	AT2G25140	Chr2	10697702	10702152	0.686317	0.716852	yes	1500	interaction140145	2-10722000	+	1476	2-10698000	+	2026	23886	15	0.069862	-28.897166	0	5	0.090518	385.901109	-5.613029	2333	3093	-11.1182	1114.098891	1114.1	-10	0.509542	0.00905829422291053	-0.888456	5.7815581793991e-16
11554000	11556000	AT1G32120	NA	Chr1	11552925	11558777	0.659543	0.711244	11476000	11478000	AT1G31950	Chr1	11475806	11478194	0.683733	0.747121	yes	961.721469	interaction40385	1-11554000	+	1963	1-11476000	+	1974	77948	11	0.079907	-18.439094	7.4e-05	3	0.113262	185.046014	-2.522364	3121	2893	-10.9265	776.675455	776.675	-6	3.63966	3.46473626897491e-62	-3.34576	2.80166578521474e-19
23656000	23658000	AT1G63770	NA	Chr1	23657505	23664677	0.817731	0.776639	23604000	23606000	AT1G63660	Chr1	23603934	23607275	0.648213	0.629894	NA	900	interaction79468	1-23656000	+	1868	1-23604000	+	1739	52107	9	0.069862	-13.7139	0.007132	2	0.101106	138.19516	-1.330893	3003	2684	-10.8158	761.80484	761.805	-4	0.256064	0.0481110763202539	-0.397091	0.0469275165600994
9508000	9510000	AT4G16892	NA	Chr4	9506321	9508337	0.577603	0.599978	9504000	9506000	AT4G16890	Chr4	9500505	9505455	0.596102	0.578236	NA	7300	interaction289110	4-9508000	+	2355	4-9504000	+	854	4265	73	0.069862	-247.339718	0	44	0.069862	4400	-127.331233	2873	887	-10.0959	2900	2900	-92	2.88438	6.73194512868525e-12	2.55938	2.02741479868906e-44
4112000	4114000	AT5G13000	NA	Chr5	4110294	4121427	0.806456	0.697912	4102000	4104000	AT5G12970	Chr5	4102134	4105327	0.523779	0.586069	NA	3596.993483	interaction334126	5-4112000	+	1796	5-4102000	+	2255	9902	43	0.083516	-122.993775	0	33	0.125615	1835.329929	-86.210063	2689	3724	-10.0878	1761.663554	1761.66	-46	0.52573	0.0384692802884094	-3.54154	7.74384335671615e-56
444000	446000	AT2G01950	NA	Chr2	440635	444276	0.69822	0.713239	432000	434000	AT2G01940	Chr2	432274	435077	3.35519	3.80095	yes	1100	interaction103509	2-444000	+	696	2-432000	+	601	11971	11	0.069862	-18.491986	7.4e-05	2	0.069862	200	-1.330893	1158	1015	-10.0045	900	900	-6	-2.05454	2.63682591736927e-10	2.52499	5.52099639951322e-33
23662000	23664000	AT1G63770	NA	Chr1	23657505	23664677	0.817731	0.776639	23652000	23654000	AT1G63750	Chr1	23650847	23655363	0.989777	0.962033	yes	7099.653834	interaction79511	1-23662000	+	1759	1-23652000	+	2116	9630	78	0.076754	-267.598263	0	65	0.102462	4431.906059	-211.079811	2702	3023	-9.85162	2667.747775	2667.75	-100	0.256064	0.0481110763202539	2.68573	2.21561601326895e-34
382000	384000	AT3G02130	NA	Chr3	380725	384405	0.676096	0.722266	356000	358000	AT3G02060	Chr3	354359	358833	0.698893	0.596378	NA	900	interaction172429	3-382000	+	1652	3-356000	+	1785	25457	9	0.069862	-13.714763	0.007132	2	0.087455	159.766192	-1.330893	2454	2841	-9.75898	740.233808	740.234	-4	0.762453	0.000221726077496109	1.65849	1.8566745484596e-62
1948000	1950000	AT1G06390	NA	Chr1	1946787	1950860	0.825928	0.784266	1918000	1920000	AT1G06270	Chr1	1918087	1919760	0.792694	0.768168	yes	1100	interaction6758	1-1948000	+	1713	1-1918000	+	1703	29976	11	0.069862	-18.442641	7.4e-05	3	0.085214	245.953587	-2.522453	2362	2876	-9.66562	854.046413	854.046	-6	0.554807	6.88707206393669e-14	-0.465622	0.0068579173411875
4826000	4828000	AT5G14920	yes	Chr5	4826478	4827980	1.87843	1.83633	4824000	4826000	AT5G14910	Chr5	4823713	4825373	0.653009	0.775113	NA	1500	interaction336520	5-4826000	+	691	5-4824000	+	217	2513	15	0.069862	-29.267336	0	4	0.069862	400	-3.975758	1059	275	-9.65418	1100	1100	-10	3.8262	1.77788878400477e-12	4.67343	7.04734367275656e-244
10454000	10456000	AT3G28080	yes	Chr3	10451485	10455267	1.0846	1.8384	10448000	10450000	AT3G28070	Chr3	10447921	10451034	0.877284	1.63768	NA	1500	interaction207123	3-10454000	+	568	3-10448000	+	313	6240	15	0.069862	-29.132334	0	4	0.069862	400	-3.974024	694	322	-9.62825	1100	1100	-10	5.74391	4.65187508414797e-38	7.98238	3.07489047309714e-23
12168000	12170000	AT4G23260	yes	Chr4	12167353	12170086	0.818255	0.892813	12146000	12148000	AT4G23200	Chr4	12145379	12147934	1.10986	0.83389	NA	1700	interaction297882	4-12168000	+	1492	4-12146000	+	1574	22094	17	0.069862	-34.529152	0	5	0.069862	500	-5.613385	2061	2073	-9.60904	1200	1200	-12	4.91018	2.06858941208711e-52	8.45071	1.25059370286714e-15
19350000	19352000	AT1G52040	yes	Chr1	19350374	19352782	2.33923	2.673	19272000	19274000	AT1G51880	Chr1	19270192	19274068	2.15673	2.95586	yes	1200	interaction65159	1-19350000	+	1224	1-19272000	+	2182	77879	12	0.069862	-20.953094	7e-06	3	0.075382	278.031315	-2.522623	1752	3430	-9.56867	921.968685	921.969	-6	5.1451	3.48050066143603e-117	-5.75359	8.00641733934526e-38
19436000	19438000	AT1G52190	yes	Chr1	19434508	19438971	1.88682	2.03277	19410000	19412000	AT1G52150	Chr1	19409710	19414678	0.935935	1.07179	yes	1300	interaction65436	1-19436000	+	1713	1-19410000	+	1207	26198	13	0.069862	-23.533691	1e-06	3	0.069862	300	-2.522562	2586	1930	-9.5667	1000	1000	-8	4.55008	4.22707778975889e-61	-0.362029	0.026457534638292
24994000	24996000	AT1G66970	yes	Chr1	24992552	24996117	0.818376	1.54751	24962000	24964000	AT1G66910	Chr1	24961633	24963946	0.832049	1.58514	yes	1300	interaction84380	1-24994000	+	1927	1-24962000	+	1603	31725	13	0.069862	-23.520001	1e-06	3	0.069862	300	-2.522547	2352	1981	-9.5662	1000	1000	-8	6.69999	7.76316060686033e-215	5.73694	4.28099263781876e-86
23308000	23310000	AT5G57560	yes	Chr5	23307129	23308282	0.809298	1.04115	23300000	23302000	AT5G57530	Chr5	23300320	23301605	0.782821	0.731153	yes	2200	interaction399168	5-23308000	+	367	5-23300000	+	1523	7656	22	0.069862	-50.012844	0	8	0.069862	800	-11.541476	405	2361	-9.47914	1400	1400	-18	3.71818	1.67400337701406e-19	-6.10467	3.55155422881274e-22
21176000	21178000	AT1G56520	yes	Chr1	21174663	21178974	1.14379	2.14797	21172000	21174000	AT1G56510	Chr1	21167588	21173632	1.01342	1.77375	yes	8700	interaction71178	1-21176000	+	1795	1-21172000	+	1254	3873	87	0.069862	-308.661527	0	56	0.069862	5600	-174.693336	1926	1113	-9.47834	3100	3100	-114	6.81212	1.85283684800453e-72	7.00144	6.28193826751109e-75
9356000	9358000	AT3G25690	NA	Chr3	9353009	9357953	0.790258	0.679135	9350000	9352000	AT3G25680	Chr3	9349611	9352427	0.855694	0.743034	NA	9700	interaction203903	3-9356000	+	1534	3-9350000	+	1119	5656	97	0.069862	-355.144377	0	64	0.069862	6400	-207.309262	2102	1711	-9.40105	3300	3300	-132	4.50534	0	1.08114	5.73567555886036e-22
21168000	21170000	AT1G56510	yes	Chr1	21167588	21173632	1.01342	1.77375	21164000	21166000	AT1G56500	Chr1	21159743	21167321	0.857098	0.765229	NA	3100	interaction71123	1-21168000	+	377	1-21164000	+	1317	3565	31	0.069862	-80.250163	0	14	0.069862	1400	-26.346719	355	1474	-9.27818	1700	1700	-30	7.00144	6.28193826751109e-75	4.0111	3.33265162847515e-131
23214000	23216000	AT3G62750	NA	Chr3	23214370	23217045	0.730716	0.548782	23212000	23214000	AT3G62740	Chr3	23211415	23213888	0.582402	0.55329	NA	14900	interaction254163	3-23214000	+	991	3-23212000	+	2043	2168	149	0.069862	-612.581542	0	109	0.069862	10900	-411.278334	1276	2830	-9.09351	4000	4000	-228	6.87761	0	-1.56051	1.08731290154517e-05
12052000	12054000	AT1G33240	NA	Chr1	12051470	12054546	0.743059	0.750513	12048000	12050000	AT1G33230	Chr1	12046640	12050066	0.825382	0.75253	NA	4100	interaction41839	1-12052000	+	926	1-12048000	+	768	4012	41	0.069862	-116.045618	0	21	0.069862	2100	-46.521446	1137	1022	-9.02527	2000	2000	-42	1.81053	1.36455424278055e-23	-0.589757	1.31820642436593e-08
11214000	11216000	AT2G26340	NA	Chr2	11215251	11217033	0.762277	0.741957	11208000	11210000	AT2G26330	Chr2	11208182	11213971	0.750457	1.51557	yes	1800	interaction141781	2-11214000	+	366	2-11208000	+	1757	6725	18	0.069862	-37.721088	0	6	0.069862	600	-7.451274	452	2583	-8.78093	1200	1200	-14	2.86072	4.21935405097963e-74	6.50377	0
21170000	21172000	AT1G56510	yes	Chr1	21167588	21173632	1.01342	1.77375	21162000	21164000	AT1G56500	Chr1	21159743	21167321	0.857098	0.765229	NA	2300	interaction71133	1-21170000	+	1623	1-21162000	+	657	7573	23	0.069862	-52.92093	0	9	0.069862	900	-13.734963	1523	762	-8.7599	1400	1400	-18	7.00144	6.28193826751109e-75	4.0111	3.33265162847515e-131
12508000	12510000	AT2G29110	yes	Chr2	12506879	12510552	2.10031	2.2937	12440000	12442000	AT2G28960	Chr2	12437913	12442347	3.14401	3.61957	yes	1000	interaction146125	2-12508000	+	2632	2-12440000	+	1079	68157	10	0.069862	-16.043758	0.000763	3	0.090564	231.422292	-2.522586	3892	1855	-8.63991	768.577708	768.578	-6	-2.08381	0.0123179555707828	-5.37377	2.41102155837694e-45
21656000	21658000	AT3G58570	NA	Chr3	21656503	21660532	0.702496	0.670075	21654000	21656000	AT3G58560	Chr3	21650595	21654200	0.743075	0.720815	NA	1000	interaction249084	3-21656000	+	1078	3-21654000	+	74	2123	10	0.069862	-16.528765	0.000499	2	0.069862	200	-1.330898	1729	153	-8.49138	800	800	-6	-0.418524	0.00282994026398708	0.383508	9.32609277043929e-06
10586000	10588000	AT4G19420	NA	Chr4	10587165	10590588	0.799087	0.800127	10582000	10584000	AT4G19410	Chr4	10580892	10585861	0.809462	0.779006	NA	3300	interaction292654	4-10586000	+	454	4-10582000	+	851	4119	33	0.069862	-87.146897	0	16	0.069862	1600	-31.782841	621	1311	-8.40501	1700	1700	-32	1.93709	2.64024690677212e-08	0.470756	2.83772585178351e-05
17828000	17830000	AT5G44260	yes	Chr5	17829625	17831225	1.86675	2.25546	17814000	17816000	AT5G44230	Chr5	17814335	17816309	0.730538	0.71067	NA	1000	interaction381138	5-17828000	+	719	5-17814000	+	1110	13579	10	0.069862	-16.060795	0.000763	2	0.069862	200	-1.330893	879	1789	-8.37038	800	800	-6	4.3073	9.24610435901236e-61	-0.472638	0.0137192108517314
13670000	13672000	AT4G27300	yes	Chr4	13669307	13672348	0.924247	0.951683	13652000	13654000	AT4G27260	Chr4	13653608	13656204	0.762011	0.774361	NA	1000	interaction303784	4-13670000	+	1798	4-13652000	+	530	17619	10	0.069862	-16.079073	0.000762	2	0.069862	200	-1.330893	2431	890	-8.37007	800	800	-6	5.23805	1.80243843901158e-201	1.16408	2.09446056557826e-23
17572000	17574000	AT5G43745	NA	Chr5	17569146	17574971	0.679825	0.598743	17550000	17552000	AT5G43700	Chr5	17550232	17551581	0.764467	0.912726	NA	1000	interaction380409	5-17572000	+	1806	5-17550000	+	586	22064	10	0.069862	-16.07242	0.000763	2	0.069862	200	-1.330893	2732	1060	-8.36613	800	800	-6	1.4153	4.33389493077123e-07	0.911398	7.44211562530183e-21
22310000	22312000	AT3G60350	NA	Chr3	22306487	22311186	0.742066	0.627159	22292000	22294000	AT3G60320	Chr3	22291885	22295371	0.737782	0.713397	NA	1000	interaction251416	3-22310000	+	859	3-22292000	+	993	17156	10	0.069862	-16.052465	0.000763	2	0.069862	200	-1.330893	1442	1484	-8.36066	800	800	-6	0.4828	4.73010958812252e-05	1.7249	1.36760241993734e-39
222000	224000	AT1G01610	yes	Chr1	221690	224340	0.725895	0.785489	176000	178000	AT1G01480	Chr1	175781	178400	1.31658	1.36186	yes	1000	interaction616	1-222000	+	1686	1-176000	+	824	45797	10	0.069862	-16.054281	0.000763	2	0.069862	200	-1.330893	2536	1588	-8.35927	800	800	-6	0.99095	0.00213160861385343	-2.1863	4.56633781698046e-08
21500000	21502000	AT5G53020	NA	Chr5	21499898	21502401	0.670869	0.633537	21470000	21472000	AT5G52930	Chr5	21470298	21471861	0.702527	0.548687	NA	1000	interaction393453	5-21500000	+	1067	5-21470000	+	1545	30657	10	0.069862	-16.04414	0.000763	2	0.069862	200	-1.330893	1935	2229	-8.35681	800	800	-6	0.630795	0.00128651182693541	5.0374	5.66947904423758e-13
9496000	9498000	AT4G16880	NA	Chr4	9496184	9497313	0.636018	0.918189	9494000	9496000	AT4G16860	Chr4	9488465	9495816	0.753631	0.663132	NA	3000	interaction289051	4-9496000	+	580	4-9494000	+	492	1905	30	0.069862	-76.469793	0	14	0.069862	1400	-26.266482	612	550	-8.32522	1600	1600	-28	7.48101	6.81002425650426e-49	3.98441	5.62444500461666e-89
17166000	17168000	AT4G36280	yes	Chr4	17165330	17169375	1.67048	3.11254	17152000	17154000	AT4G36250	Chr4	17150868	17153578	1.22454	1.48178	yes	3800	interaction315749	4-17166000	+	1358	4-17152000	+	2143	13936	38	0.069862	-104.437838	0	23	0.079152	2030.046757	-52.678952	2025	3116	-8.2413	1769.953243	1769.95	-38	4.79	3.41448579317136e-24	2.24192	2.36375710880285e-06
7616000	7618000	AT5G22800	NA	Chr5	7616072	7619981	0.712432	0.593739	7594000	7596000	AT5G22780	Chr5	7589853	7598049	0.711456	0.626991	NA	1400	interaction346399	5-7616000	+	1865	5-7594000	+	945	21972	14	0.069862	-26.205986	0	4	0.069862	400	-3.966035	2447	1543	-8.22782	1000	1000	-8	3.89267	1.41453653040704e-145	-0.220304	0.0392847883573017
2074000	2076000	AT3G06640	NA	Chr3	2074188	2078317	0.53491	0.516312	2072000	2074000	AT3G06630	Chr3	2070387	2073800	0.48862	0.603189	NA	16687.124345	interaction178041	3-2074000	+	2770	3-2072000	+	2426	1879	331	0.138576	-1617.793137	0	476	0.239503	13884.709745	-2491.626723	4547	4199	-8.13364	2802.414601	2802.41	-606	2.2149	2.99425924385214e-09	-2.36349	1.083283460225e-13
26148000	26150000	AT1G69550	yes	Chr1	26148020	26153555	0.688331	0.730688	26142000	26144000	AT1G69530	Chr1	26141835	26143500	0.731312	0.745033	NA	4100	interaction88342	1-26148000	+	725	1-26142000	+	1423	5806	41	0.069862	-116.108277	0	22	0.069862	2200	-49.624952	1070	1721	-8.09243	1900	1900	-42	2.52133	7.79976490954534e-30	2.48854	1.39624199901048e-06
9634000	9636000	AT3G26290	yes	Chr3	9632681	9634470	1.53543	2.34103	9630000	9632000	AT3G26280	Chr3	9630199	9632009	1.57294	1.87761	yes	9100	interaction204719	3-9634000	+	838	3-9630000	+	1956	3323	91	0.069862	-328.6184	0	62	0.069862	6200	-199.679509	1022	2467	-8.03241	2900	2900	-122	1.01842	2.76338153119782e-07	5.27189	7.78824237130772e-31
22748000	22750000	AT3G61480	yes	Chr3	22749983	22756584	0.484119	0.470286	22744000	22746000	AT3G61470	Chr3	22745652	22747282	0.716804	1.80697	yes	1900	interaction252772	3-22748000	+	421	3-22744000	+	523	3151	19	0.069862	-40.659234	0	7	0.069862	700	-9.418834	615	745	-8.01987	1200	1200	-14	-0.232015	0.0288086946374242	6.89194	6.45497492291243e-104
9794000	9796000	AT2G23000	yes	Chr2	9792211	9795863	1.13174	1.89497	9788000	9790000	AT2G22990	Chr2	9786315	9790179	1.00135	1.80243	yes	3400	interaction137065	2-9794000	+	870	2-9788000	+	736	5884	34	0.069862	-90.281699	0	17	0.069862	1700	-34.569036	1262	1002	-8.01921	1700	1700	-32	3.85127	3.6437889814708e-25	4.3584	9.62373442943335e-23
12726000	12728000	AT4G24670	yes	Chr4	12727833	12731274	0.843144	1.47999	12710000	12712000	AT4G24620	Chr4	12708751	12712825	0.742232	0.75318	NA	1900	interaction300215	4-12726000	+	1285	4-12710000	+	1452	16050	19	0.069862	-40.408772	0	7	0.069862	700	-9.40465	1413	2271	-7.96559	1200	1200	-14	1.53356	8.07522450297386e-16	-0.536178	2.0679164874982e-09
24204000	24206000	AT1G65150	yes	Chr1	24203840	24205775	1.27606	1.32766	24194000	24196000	AT1G65120	Chr1	24191347	24196073	0.533304	0.576228	NA	5072.492099	interaction81465	1-24204000	+	1736	1-24194000	+	2116	10025	55	0.07575	-170.143105	0	42	0.094917	3091.330279	-119.093323	2393	3162	-7.91822	1981.16182	1981.16	-62	0.819333	0.00387345556361415	-1.17329	0.00141584743954527
14634000	14636000	AT4G29920	yes	Chr4	14632652	14635885	0.657139	0.761217	14612000	14614000	AT4G29900	Chr4	14610882	14619573	0.790939	0.734825	yes	2146.470933	interaction307133	4-14634000	+	1648	4-14612000	+	2107	22183	22	0.071604	-49.555127	0	14	0.105169	929.998425	-26.149708	2892	2899	-7.87396	1216.472508	1216.47	-18	-0.607528	0.00400103782793584	-0.581611	3.50627323486049e-18
182000	184000	AT4G00420	NA	Chr4	181322	184387	0.842203	0.751681	168000	170000	AT4G00380	Chr4	167958	170974	0.927342	1.67457	yes	2200	interaction255716	4-182000	+	644	4-168000	+	1868	14103	22	0.069862	-49.75764	0	9	0.069862	900	-13.730643	861	2429	-7.81234	1300	1300	-18	0.364304	0.00320470535861164	1.99677	1.69968031178904e-19
714000	716000	AT5G03050	yes	Chr5	715028	716321	1.18744	1.15933	710000	712000	AT5G03040	Chr5	710101	712994	0.720726	0.829457	NA	3900	interaction322390	5-714000	+	955	5-710000	+	704	4220	39	0.069862	-108.625403	0	21	0.069862	2100	-46.511459	1469	1079	-7.66921	1800	1800	-40	0.843813	1.31458982905817e-08	0.467374	1.6100732967928e-07
28340000	28342000	AT1G75500	yes	Chr1	28337725	28340275	1.77001	1.52154	28334000	28336000	AT1G75490	Chr1	28335501	28336706	2.30938	3.23713	yes	1700	interaction95708	1-28340000	+	372	1-28334000	+	715	5909	17	0.069862	-34.777327	0	6	0.069862	600	-7.443663	675	981	-7.65383	1100	1100	-12	-0.44292	0.0342540807853703	3.40687	1.17386192983072e-58
3842000	3844000	AT1G11410	NA	Chr1	3841285	3844432	0.521196	0.5498	3814000	3816000	AT1G11340	Chr1	3814115	3817420	0.541982	0.466643	NA	1000	interaction13694	1-3842000	+	1825	1-3814000	+	1831	28223	10	0.069862	-16.029893	0.000763	4	0.105899	263.882001	-3.965129	3106	2718	-7.63891	736.117999	736.118	-6	2.69295	5.91415232123747e-51	6.65198	1.99932333243952e-50
15614000	15616000	AT2G37170	NA	Chr2	15613401	15614857	0.667036	0.683207	15606000	15608000	AT2G37150	Chr2	15603580	15608454	0.754769	0.717187	NA	1700	interaction157389	2-15614000	+	577	2-15606000	+	929	7827	17	0.069862	-34.659083	0	6	0.069862	600	-7.438362	1030	1732	-7.62916	1100	1100	-12	-2.60099	1.15182065093182e-40	-0.705565	2.59063145604376e-07
2142000	2144000	AT3G06780	NA	Chr3	2143487	2144521	0.524582	0.673617	2136000	2138000	AT3G06770	Chr3	2134799	2137228	0.724152	0.65039	NA	1700	interaction178298	3-2142000	+	597	3-2136000	+	859	6591	17	0.069862	-34.651941	0	6	0.069862	600	-7.43819	1048	1188	-7.62836	1100	1100	-12	1.48767	2.06789017838481e-11	1.7527	3.03586626661738e-36
9744000	9746000	AT5G27600	NA	Chr5	9742575	9747005	0.762141	0.69917	9728000	9730000	AT5G27550	Chr5	9727453	9731341	0.543104	0.529258	NA	1700	interaction353532	5-9744000	+	1137	5-9728000	+	1081	17041	17	0.069862	-34.560147	0	6	0.069862	600	-7.434804	1670	1594	-7.61269	1100	1100	-12	-0.429751	0.00201812807847838	0.680255	0.00153262500349457
12508000	12510000	AT2G29110	yes	Chr2	12506879	12510552	2.10031	2.2937	12446000	12448000	AT2G28970	Chr2	12443918	12448163	2.60862	3.17103	yes	666.930962	interaction146128	2-12508000	+	2632	2-12446000	+	1737	61657	9	0.094276	-13.713919	0.007132	3	0.131038	159.943499	-2.522395	3892	2684	-7.57984	506.987463	506.987	-4	-2.08381	0.0123179555707828	-5.31659	4.18982468697422e-130
25464000	25466000	AT1G67900	NA	Chr1	25464725	25470017	0.783244	0.873348	25462000	25464000	AT1G67890	Chr1	25457178	25462792	0.807997	0.730936	NA	6800	interaction86154	1-25464000	+	687	1-25462000	+	750	1916	68	0.069862	-226.275092	0	44	0.069862	4400	-127.245103	966	1066	-7.49118	2400	2400	-84	2.33608	1.4491726928303e-25	0.521039	0.00208256711795187
26658000	26660000	AT1G70710	NA	Chr1	26659131	26663010	0.721057	0.775479	26656000	26658000	AT1G70700	Chr1	26654767	26657064	0.723519	0.975172	NA	2300	interaction89818	1-26658000	+	292	1-26656000	+	498	2020	23	0.069862	-53.379872	0	10	0.069862	1000	-16.10614	382	673	-7.45446	1300	1300	-20	-0.700258	0.0328315938064221	4.15477	2.22287635658496e-89
25000000	25002000	AT1G66980	yes	Chr1	24997308	25001983	0.80125	1.88024	24986000	24988000	AT1G66960	Chr1	24984940	24989797	2.11796	2.81176	yes	2900	interaction84443	1-25000000	+	1444	1-24986000	+	1883	14269	29	0.069862	-72.487132	0	14	0.069862	1400	-26.16999	1658	2535	-7.42052	1500	1500	-26	7.38135	0	-3.92277	8.31383842294798e-06
948000	950000	AT2G03140	NA	Chr2	941911	950328	0.732319	0.632458	938000	940000	AT2G03120	Chr2	937419	940339	0.793232	0.77323	NA	2000	interaction104848	2-948000	+	923	2-938000	+	628	10442	20	0.069862	-43.563103	0	8	0.069862	800	-11.510386	1543	971	-7.39845	1200	1200	-16	0.383459	0.0159296752495828	-0.741235	7.00665083483852e-16
12726000	12728000	AT4G24670	yes	Chr4	12727833	12731274	0.843144	1.47999	12712000	12714000	AT4G24620	Chr4	12708751	12712825	0.742232	0.75318	NA	2000	interaction300216	4-12726000	+	1285	4-12712000	+	950	14138	20	0.069862	-43.468783	0	8	0.069862	800	-11.503465	1413	1524	-7.37938	1200	1200	-16	1.53356	8.07522450297386e-16	-0.536178	2.0679164874982e-09
19830000	19832000	AT3G53480	NA	Chr3	19825306	19831797	0.601698	0.654463	19820000	19822000	AT3G53460	Chr3	19819184	19821519	0.778638	0.709829	NA	1500	interaction242395	3-19830000	+	1441	3-19820000	+	235	9646	15	0.069862	-29.233416	0	5	0.069862	500	-5.627003	2427	379	-7.36922	1000	1000	-10	-5.0051	1.32012107939761e-65	2.94146	4.53971802776303e-26
2206000	2208000	AT3G06990	yes	Chr3	2206386	2208058	1.8264	2.15595	2202000	2204000	AT3G06980	Chr3	2201466	2204833	0.811243	0.687435	yes	12700	interaction178543	3-2206000	+	2053	3-2202000	+	1586	3963	127	0.069862	-497.650956	0	157	0.11572	9478.356024	-645.982463	3521	2620	-7.3457	3221.643976	3221.64	-186	-2.03726	9.20980642449332e-12	2.60585	4.09989101966029e-89
356000	358000	AT3G02060	NA	Chr3	354359	358833	0.698893	0.596378	352000	354000	AT3G02050	Chr3	350615	354345	0.661544	0.579137	NA	18200	interaction172337	3-356000	+	1785	3-352000	+	1739	4255	182	0.069862	-779.360714	0	204	0.099145	14374.822461	-893.028461	2841	2782	-7.21283	3825.177539	3825.18	-292	1.65849	1.8566745484596e-62	1.51286	1.03837561855577e-34
12982000	12984000	AT1G35350	yes	Chr1	12981250	12984583	0.950129	0.97825	12978000	12980000	AT1G35340	Chr1	12977667	12979910	0.822914	0.754756	NA	6600	interaction44963	1-12982000	+	874	1-12978000	+	988	4156	66	0.069862	-216.961297	0	43	0.069862	4300	-123.413049	969	1448	-7.12338	2300	2300	-80	2.34229	7.0147764491327e-17	3.01565	1.30008137966013e-84
26662000	26664000	AT1G70710	NA	Chr1	26659131	26663010	0.721057	0.775479	26656000	26658000	AT1G70700	Chr1	26654767	26657064	0.723519	0.975172	NA	1300	interaction89826	1-26662000	+	751	1-26656000	+	498	5853	13	0.069862	-23.613117	1e-06	4	0.069862	400	-3.968751	1372	673	-7.04049	900	900	-8	-0.700258	0.0328315938064221	4.15477	2.22287635658496e-89
26452000	26454000	AT1G70250	yes	Chr1	26452964	26456088	2.08374	3.02691	26440000	26442000	AT1G70210	Chr1	26439863	26442829	0.748978	1.64516	yes	1300	interaction89174	1-26452000	+	875	1-26440000	+	606	12188	13	0.069862	-23.588923	1e-06	4	0.069862	400	-3.967539	1750	899	-7.02931	900	900	-8	0.758169	0.00649796438449118	0.93349	0.0374575467846942
11552000	11554000	AT1G32120	NA	Chr1	11552925	11558777	0.659543	0.711244	11538000	11540000	AT1G32080	Chr1	11537341	11539800	0.779967	0.607071	NA	1800	interaction40381	1-11552000	+	752	1-11538000	+	1685	14528	18	0.069862	-37.524552	0	7	0.069862	700	-9.406004	1257	2384	-6.98865	1100	1100	-14	3.63966	3.46473626897491e-62	7.23763	2.65338321561034e-110
9566000	9568000	AT4G17000	NA	Chr4	9566901	9569913	0.653617	0.705127	9562000	9564000	AT4G16990	Chr4	9560134	9565555	1.59986	2.69044	yes	5700	interaction289386	4-9566000	+	718	4-9562000	+	1739	4390	57	0.069862	-179.58464	0	36	0.069862	3600	-97.334377	940	1790	-6.94644	2100	2100	-66	0.773732	0.0358202322209048	7.82268	3.13637103124229e-138
19486000	19488000	AT5G48090	yes	Chr5	19484164	19488657	0.676323	0.745789	19482000	19484000	AT5G48070	Chr5	19482105	19483452	2.16843	1.86443	yes	3100	interaction386537	5-19486000	+	1323	5-19482000	+	351	4000	31	0.069862	-80.341164	0	16	0.069862	1600	-31.776147	2366	646	-6.93973	1500	1500	-30	-2.02344	6.82063982250474e-06	-5.20661	4.41913043047598e-26
27778000	27780000	AT1G73870	yes	Chr1	27779165	27780676	1.49307	3.62649	27774000	27776000	AT1G73860	Chr1	27770985	27776857	0.722518	0.814391	yes	13171.192221	interaction93567	1-27778000	+	1758	1-27774000	+	2063	4221	141	0.074789	-566.85279	0	139	0.096035	10111.743323	-555.079165	2530	3026	-6.87214	3059.448898	3059.45	212	7.63564	1.08258065846194e-95	-3.81201	1.94631516690857e-28
8054000	8056000	AT3G22790	yes	Chr3	8052317	8058764	0.619109	0.6469	8044000	8046000	AT3G22760	Chr3	8044454	8047530	0.808832	1.18657	yes	1100	interaction199774	3-8054000	+	1210	3-8044000	+	254	10075	11	0.069862	-18.597642	6.8e-05	3	0.069862	300	-2.524842	2089	400	-6.866	800	800	6	-0.696747	2.43688945020547e-05	2.82137	3.86607284495622e-43
16856000	16858000	AT2G40360	yes	Chr2	16852879	16856690	0.831758	0.751129	16840000	16842000	AT2G40320	Chr2	16840146	16842282	0.700383	0.758035	NA	900	interaction161605	2-16856000	+	229	2-16840000	+	1420	16256	9	0.069862	-13.823392	0.006811	2	0.069862	200	-1.330894	534	2454	-6.84498	700	700	4	-0.726777	0.0062813855098777	-2.1045	3.75970030134806e-17
19238000	19240000	AT1G51820	yes	Chr1	19237406	19241883	2.04328	2.14386	19220000	19222000	AT1G51805	Chr1	19220976	19225690	1.62494	2.48797	yes	1100	interaction64645	1-19238000	+	1098	1-19220000	+	633	17626	11	0.069862	-18.488115	7.4e-05	3	0.069862	300	-2.523721	1586	655	-6.8441	800	800	6	1.48462	3.50273617468003e-07	7.1917	1.37600524771529e-223
8636000	8638000	AT5G25060	NA	Chr5	8634073	8640217	0.819809	0.721054	8624000	8626000	AT5G25040	Chr5	8621953	8624337	0.703327	0.655164	NA	900	interaction349818	5-8636000	+	1412	5-8624000	+	482	11995	9	0.069862	-13.756856	0.00713	2	0.069862	200	-1.330894	2038	561	-6.84355	700	700	4	0.405162	0.00697072969015003	6.82173	2.68316904898865e-56
6162000	6164000	AT3G18010	yes	Chr3	6161136	6163272	3.73805	5.32606	6148000	6150000	AT3G17970	Chr3	6147961	6152018	0.878222	0.866188	NA	900	interaction192616	3-6162000	+	479	3-6148000	+	567	13417	9	0.069862	-13.75723	0.00713	2	0.069862	200	-1.330893	820	1062	-6.83463	700	700	4	7.29581	2.27089192242883e-20	0.841072	8.94531187525329e-24
2102000	2104000	AT3G06660	NA	Chr3	2102401	2104906	0.632653	0.706979	2072000	2074000	AT3G06630	Chr3	2070387	2073800	0.48862	0.603189	NA	900	interaction178189	3-2102000	+	535	3-2072000	+	2426	30715	9	0.069862	-13.750942	0.007132	2	0.069862	200	-1.330893	880	4199	-6.83331	700	700	4	1.37104	1.03523069031822e-21	-2.36349	1.083283460225e-13
7616000	7618000	AT5G22800	NA	Chr5	7616072	7619981	0.712432	0.593739	7592000	7594000	AT5G22780	Chr5	7589853	7598049	0.711456	0.626991	NA	1100	interaction346398	5-7616000	+	1865	5-7592000	+	843	24030	11	0.069862	-18.47004	7.4e-05	3	0.069862	300	-2.522841	2447	1314	-6.82703	800	800	6	3.89267	1.41453653040704e-145	-0.220304	0.0392847883573017
23654000	23656000	AT1G63750	yes	Chr1	23650847	23655363	0.989777	0.962033	23620000	23622000	AT1G63690	Chr1	23618377	23622396	0.79955	0.777172	NA	900	interaction79457	1-23654000	+	1660	1-23620000	+	890	33875	9	0.069862	-13.729561	0.007132	2	0.069862	200	-1.330893	2366	1399	-6.82666	700	700	4	2.68573	2.21561601326895e-34	0.474601	1.51161850848892e-06
23112000	23114000	AT1G62440	yes	Chr1	23111817	23115293	2.45246	1.88794	23060000	23062000	AT1G62360	Chr1	23058581	23061722	4.29625	5.97135	yes	900	interaction77624	1-23112000	+	976	1-23060000	+	1688	52024	9	0.069862	-13.72673	0.007132	2	0.069862	200	-1.330893	1710	2972	-6.82462	700	700	4	-3.29872	4.93118349464032e-12	6.37958	1.74971202303482e-34
23650000	23652000	AT1G63750	yes	Chr1	23650847	23655363	0.989777	0.962033	23624000	23626000	AT1G63700	Chr1	23624665	23629112	0.84574	0.707138	yes	900	interaction79435	1-23650000	+	1072	1-23624000	+	1452	25346	9	0.069862	-13.724108	0.007132	2	0.069862	200	-1.330893	1722	2222	-6.82455	700	700	4	2.68573	2.21561601326895e-34	0.430874	0.000901994317630334
8780000	8782000	AT3G24240	yes	Chr3	8780423	8784368	0.866185	0.687559	8744000	8746000	AT3G24190	Chr3	8743252	8747901	0.698408	0.630788	NA	1000	interaction201939	3-8780000	+	1564	3-8744000	+	1251	36080	10	0.069862	-16.03909	0.000763	3	0.071231	294.234856	-2.522558	2921	1944	-6.82156	705.765144	705.765	6	-5.48013	4.81136665203793e-27	1.65189	6.48247558644836e-16
24992000	24994000	AT1G66970	yes	Chr1	24992552	24996117	0.818376	1.54751	24962000	24964000	AT1G66910	Chr1	24961633	24963946	0.832049	1.58514	yes	1531.480478	interaction84359	1-24992000	+	2346	1-24962000	+	1603	29494	17	0.077549	-34.523518	0	6	0.069862	600	-7.433536	2608	1981	-6.59039	931.480478	931.48	12	6.69999	7.76316060686033e-215	5.73694	4.28099263781876e-86
12052000	12054000	AT1G33240	NA	Chr1	12051470	12054546	0.743059	0.750513	12046000	12048000	AT1G33230	Chr1	12046640	12050066	0.825382	0.75253	NA	4500	interaction41838	1-12052000	+	926	1-12046000	+	1248	5493	45	0.069862	-131.141603	0	27	0.069862	2700	-65.809881	1137	1891	-6.55696	1800	1800	48	1.81053	1.36455424278055e-23	-0.589757	1.31820642436593e-08
19736000	19738000	AT3G53240	NA	Chr3	19733765	19739181	0.75345	0.692269	19726000	19728000	AT3G53230	Chr3	19723350	19726672	0.608863	0.677188	NA	6745.419831	interaction242091	3-19736000	+	2214	3-19726000	+	1656	10169	73	0.075606	-245.822684	0	70	0.104834	4664.836418	-232.32907	3191	2619	-6.52816	2080.583413	2080.58	92	0.616031	5.54146930180461e-06	-2.48445	4.22292225386539e-54
19126000	19128000	AT1G51580	NA	Chr1	19125582	19128161	0.643704	0.619525	19122000	19124000	AT1G51570	Chr1	19122169	19124688	0.770519	0.614384	NA	13500	interaction64291	1-19126000	+	1480	1-19122000	+	1957	3706	135	0.069862	-537.792192	0	120	0.08049	10415.446877	-461.944079	2277	2818	-6.5177	3084.553123	3084.55	200	1.00216	2.39121686016999e-10	1.36181	3.26376641074326e-50
3704000	3706000	AT1G11100	NA	Chr1	3703671	3709302	0.543857	0.607933	3690000	3692000	AT1G11070	Chr1	3690211	3693648	0.776178	0.860855	yes	3153.937873	interaction13221	1-3704000	+	1927	1-3690000	+	1951	14295	35	0.077528	-93.401252	0	37	0.143205	1805.027897	-100.496406	3471	3289	-6.51704	1348.909976	1348.91	34	-3.1086	1.87450145300632e-75	-0.979147	0.00278702229066822
21170000	21172000	AT1G56510	yes	Chr1	21167588	21173632	1.01342	1.77375	21158000	21160000	AT1G56500	Chr1	21159743	21167321	0.857098	0.765229	NA	2200	interaction71131	1-21170000	+	1623	1-21158000	+	1068	11609	22	0.069862	-49.625325	0	10	0.069862	1000	-16.033865	1523	1555	-6.48402	1200	1200	18	7.00144	6.28193826751109e-75	4.0111	3.33265162847515e-131
19436000	19438000	AT1G52190	yes	Chr1	19434508	19438971	1.88682	2.03277	19396000	19398000	AT1G52120	Chr1	19396080	19398244	3.47303	4.19871	yes	900	interaction65435	1-19436000	+	1713	1-19396000	+	1310	39587	9	0.069862	-13.71927	0.007132	3	0.081552	256.997052	-2.522424	2586	2514	-6.47367	643.002948	643.003	4	4.55008	4.22707778975889e-61	-5.16949	7.13393712630422e-09
21234000	21236000	AT5G52290	yes	Chr5	21230352	21236554	0.528124	0.64175	21208000	21210000	AT5G52230	Chr5	21207887	21211986	0.757041	0.656621	NA	1200	interaction392547	5-21234000	+	2009	5-21208000	+	1625	26194	12	0.069862	-20.94185	7e-06	6	0.098015	427.660998	-7.43227	2988	2615	-6.37331	772.339002	772.339	6	1.58518	9.60612806051788e-05	0.456284	3.25155441070056e-05
15600000	15602000	AT4G32300	NA	Chr4	15599474	15602595	0.690725	0.627971	15570000	15572000	AT4G32250	Chr4	15570043	15573323	0.716494	0.627471	NA	900	interaction310306	4-15600000	+	1442	4-15570000	+	2008	29694	9	0.069862	-13.717276	0.007132	4	0.106807	261.637225	-3.965246	2473	3443	-6.35567	638.362775	638.363	4	0.828702	0.0121342890309324	0.802236	5.25469649905743e-06
9510000	9512000	AT4G16900	NA	Chr4	9511858	9516541	0.627999	0.562104	9500000	9502000	AT4G16890	Chr4	9500505	9505455	0.596102	0.578236	NA	4200	interaction289122	4-9510000	+	2647	4-9500000	+	1195	9842	42	0.069862	-119.443429	0	25	0.069862	2500	-59.180569	3010	1288	-6.29998	1700	1700	44	1.16585	7.73801154939317e-22	2.55938	2.02741479868906e-44
3706000	3708000	AT1G11100	NA	Chr1	3703671	3709302	0.543857	0.607933	3690000	3692000	AT1G11070	Chr1	3690211	3693648	0.776178	0.860855	yes	2900	interaction13231	1-3706000	+	1606	1-3690000	+	1951	15661	29	0.069862	-72.460336	0	27	0.118905	1586.377698	-65.634521	2882	3289	-6.27049	1313.622302	1313.62	26	-3.1086	1.87450145300632e-75	-0.979147	0.00278702229066822
19354000	19356000	AT3G52190	NA	Chr3	19353971	19357074	0.757791	0.752068	19350000	19352000	AT3G52180	Chr3	19349651	19353596	0.774521	0.681915	NA	3000	interaction240827	3-19354000	+	954	3-19350000	+	480	4971	30	0.069862	-76.491381	0	16	0.069862	1600	-31.777444	1681	641	-6.25976	1400	1400	28	-0.757031	5.00566724546967e-07	3.15425	2.95856298246463e-85
21174000	21176000	AT1G56520	yes	Chr1	21174663	21178974	1.14379	2.14797	21170000	21172000	AT1G56510	Chr1	21167588	21173632	1.01342	1.77375	yes	8800	interaction71161	1-21174000	+	1460	1-21170000	+	1623	4176	88	0.069862	-312.769545	0	63	0.069862	6300	-203.253415	1674	1523	-6.23984	2500	2500	116	6.81212	1.85283684800453e-72	7.00144	6.28193826751109e-75
4094000	4096000	AT1G12100	yes	Chr1	4095245	4095845	2.97429	5.4234	4070000	4072000	AT1G12040	Chr1	4070123	4072567	0.679292	0.705253	yes	1400	interaction14593	1-4094000	+	903	1-4070000	+	1286	24544	14	0.069862	-26.209889	0	5	0.069862	500	-5.614682	1447	2260	-6.2259	900	900	8	1.98068	0.0117094661603506	-5.94267	8.40601885922316e-54
7048000	7050000	AT4G11670	NA	Chr4	7044243	7053091	0.74522	0.715996	7014000	7016000	AT4G11610	Chr4	7013728	7018049	1.29949	1.58962	yes	1674.877073	interaction280838	4-7048000	+	1802	4-7014000	+	2245	34277	20	0.083423	-43.382462	0	14	0.12292	795.693981	-26.150886	2772	3535	-6.20978	879.183091	879.183	16	-0.462391	0.000578035696335415	-5.61028	1.96617018918136e-19
718000	720000	AT1G03060	NA	Chr1	712472	726891	0.71105	0.640518	688000	690000	AT1G03000	Chr1	687889	692560	0.807065	0.711639	NA	1300	interaction2290	1-718000	+	2428	1-688000	+	1299	29516	13	0.069862	-23.529763	1e-06	7	0.097145	503.407254	-9.401257	3774	2052	-6.09856	796.592746	796.593	8	-0.531658	0.00200253536972067	0.769634	1.4821673990774e-14
9508000	9510000	AT4G16892	NA	Chr4	9506321	9508337	0.577603	0.599978	9496000	9498000	AT4G16880	Chr4	9496184	9497313	0.636018	0.918189	NA	1700	interaction289106	4-9508000	+	2355	4-9496000	+	580	12214	17	0.069862	-34.65798	0	7	0.069862	700	-9.418958	2873	612	-6.09348	1000	1000	12	2.88438	6.73194512868525e-12	7.48101	6.81002425650426e-49
9574000	9576000	AT4G17010	NA	Chr4	9575811	9577967	0.75289	0.734756	9560000	9562000	AT4G16990	Chr4	9560134	9565555	1.59986	2.69044	yes	1700	interaction289410	4-9574000	+	640	4-9560000	+	1293	14156	17	0.069862	-34.638111	0	7	0.069862	700	-9.40975	963	1270	-6.06994	1000	1000	12	-0.336807	0.021187122889997	7.82268	3.13637103124229e-138
10302000	10304000	AT1G29430	NA	Chr1	10302649	10303335	0.553095	0.425599	10286000	10288000	AT1G29390	Chr1	10286292	10288103	0.790989	0.712154	NA	1700	interaction35997	1-10302000	+	1178	1-10286000	+	1032	16216	17	0.069862	-34.5655	0	7	0.069862	700	-9.403957	1509	1656	-6.05524	1000	1000	12	6.46144	4.69543037457803e-38	2.62238	2.52694910089631e-32
20444000	20446000	AT3G55160	NA	Chr3	20445411	20452400	0.659661	0.607055	20434000	20436000	AT3G55130	Chr3	20433877	20436390	3.19462	4.2781	yes	4632.608862	interaction244641	3-20444000	+	1632	3-20434000	+	2599	10031	58	0.087467	-182.429538	0	67	0.150129	3117.815559	-219.486977	2828	4232	-6.02178	1514.793302	1514.79	68	-0.555484	0.0488099497378342	5.86438	7.5614483398405e-129
23528000	23530000	AT1G63440	yes	Chr1	23527654	23531109	0.812802	0.740054	23500000	23502000	AT1G63360	Chr1	23499514	23502169	0.953986	1.9994	yes	1471.08896	interaction78954	1-23528000	+	2427	1-23500000	+	1708	28368	18	0.085482	-37.421719	0	12	0.123336	679.725848	-20.932826	4457	2206	-6.00173	791.363112	791.363	14	-3.08086	2.57931379491646e-63	6.1313	8.89591949188856e-119
11574000	11576000	AT1G32170	yes	Chr1	11575319	11577927	2.23136	1.24359	11566000	11568000	AT1G32150	Chr1	11565517	11568531	0.93265	0.811815	yes	1200	interaction40444	1-11574000	+	431	1-11566000	+	533	7627	12	0.069862	-21.037574	6e-06	4	0.069862	400	-3.967702	860	920	-5.89022	800	800	6	-1.95864	6.34810837840481e-06	0.489402	0.0209857670008802
18052000	18054000	AT5G44750	NA	Chr5	18052607	18060169	0.731353	0.673691	18034000	18036000	AT5G44700	Chr5	18032863	18036894	0.61373	0.681932	NA	1200	interaction381841	5-18052000	+	699	5-18034000	+	1754	18886	12	0.069862	-20.987441	7e-06	4	0.069862	400	-3.966968	1068	2896	-5.88509	800	800	6	0.20249	0.0474586859083171	-3.35799	5.24092082899956e-26
15418000	15420000	AT2G36780	yes	Chr2	15417489	15419154	1.77859	2.27624	15388000	15390000	AT2G36710	Chr2	15389465	15391251	0.710576	0.731517	yes	1200	interaction156615	2-15418000	+	2270	2-15388000	+	1091	29485	12	0.069862	-20.958656	7e-06	4	0.069862	400	-3.96576	2806	1776	-5.87667	800	800	6	4.16888	6.8181541951568e-15	-2.35252	1.90088116245963e-05
13946000	13948000	AT2G32870	yes	Chr2	13944610	13946790	2.9117	3.6308	13916000	13918000	AT2G32800	Chr2	13916451	13919179	0.654101	0.691604	NA	1200	interaction151357	2-13946000	+	1448	2-13916000	+	1203	29695	12	0.069862	-20.95389	7e-06	4	0.069862	400	-3.965559	2623	1996	-5.87527	800	800	6	8.4884	2.65906765134821e-123	1.71381	1.13900058497971e-12
2580000	2582000	AT3G08505	NA	Chr3	2580076	2582129	0.772233	0.715448	2552000	2554000	AT3G07990	Chr3	2552476	2554921	0.651831	0.617861	NA	1200	interaction179781	3-2580000	+	1431	3-2552000	+	1323	27986	12	0.069862	-20.949682	7e-06	4	0.069862	400	-3.965451	2309	2138	-5.87452	800	800	6	1.0038	3.41133001931951e-07	-0.872063	4.60767930101342e-12
668000	670000	AT5G02880	NA	Chr5	662063	669107	0.799099	0.768007	646000	648000	AT5G02830	Chr5	644278	648466	0.721565	0.655266	NA	1200	interaction322126	5-668000	+	1481	5-646000	+	1625	21442	12	0.069862	-20.945185	7e-06	4	0.069862	400	-3.96536	2275	2381	-5.87389	800	800	6	-0.535391	0.00192692593564208	3.14149	1.12002406293175e-31
356000	358000	AT3G02060	NA	Chr3	354359	358833	0.698893	0.596378	342000	344000	AT3G02020	Chr3	340545	343835	0.614418	0.595021	yes	2255.966884	interaction172332	3-356000	+	1785	3-342000	+	1935	14542	23	0.071226	-52.694454	0	19	0.113008	1174.591373	-40.342862	2841	3171	-5.81777	1081.375511	1081.38	18	1.65849	1.8566745484596e-62	1.94387	6.10311257123745e-05
21176000	21178000	AT1G56520	yes	Chr1	21174663	21178974	1.14379	2.14797	21170000	21172000	AT1G56510	Chr1	21167588	21173632	1.01342	1.77375	yes	6800	interaction71177	1-21176000	+	1795	1-21170000	+	1623	6194	68	0.069862	-224.324297	0	47	0.069862	4700	-138.468898	1926	1523	-5.80116	2100	2100	84	6.81212	1.85283684800453e-72	7.00144	6.28193826751109e-75
11254000	11256000	AT3G29320	NA	Chr3	11252806	11257814	0.788382	0.64508	11250000	11252000	AT3G29310	Chr3	11249651	11251820	0.744804	0.837618	yes	6200	interaction209784	3-11254000	+	1068	3-11250000	+	1226	3874	62	0.069862	-199.599095	0	42	0.069862	4200	-119.32639	1434	1720	-5.80037	2000	2000	74	2.9231	5.70352986235122e-52	-0.550188	1.02771149541525e-06
15876000	15878000	AT2G37940	NA	Chr2	15876749	15879655	0.81808	0.856655	15874000	15876000	AT2G37930	Chr2	15873116	15874972	0.614892	0.593935	NA	2100	interaction158375	2-15876000	+	574	2-15874000	+	521	2699	21	0.069862	-46.704622	0	10	0.069862	1000	-16.050114	951	909	-5.72237	1100	1100	16	-0.307796	0.00543440075065133	0.617058	4.17078777234754e-05
1132000	1134000	AT5G04140	NA	Chr5	1129851	1138442	0.747643	0.588822	1126000	1128000	AT5G04130	Chr5	1121827	1128091	0.822894	0.77177	NA	2100	interaction323765	5-1132000	+	1683	5-1126000	+	607	5858	21	0.069862	-46.651409	0	10	0.069862	1000	-16.049588	2063	921	-5.72165	1100	1100	16	7.40463	1.23797485802098e-227	0.712871	0.000167482205947915
15920000	15922000	AT4G32990	yes	Chr4	15920229	15922658	0.836425	1.2595	15916000	15918000	AT4G32980	Chr4	15914721	15918044	0.784996	2.03499	NA	7000	interaction311397	4-15920000	+	1108	4-15916000	+	824	4599	70	0.069862	-234.358549	0	49	0.069862	4900	-146.61211	1549	1075	-5.71587	2100	2100	86	6.48838	1.10985748838684e-18	6.9929	1.24621049970409e-113
2534000	2536000	AT4G04960	NA	Chr4	2533055	2535386	0.699354	0.731406	2522000	2524000	AT4G04955	Chr4	2522033	2525280	0.636576	0.65289	NA	2100	interaction264648	4-2534000	+	618	4-2522000	+	963	11626	21	0.069862	-46.645684	0	10	0.069862	1000	-16.043601	1084	1510	-5.7135	1100	1100	16	-1.74128	6.23368067899316e-05	-1.22855	6.60024470970854e-11
9548000	9550000	AT4G16960	NA	Chr4	9546342	9551007	0.400495	0.414563	9544000	9546000	AT4G16950	Chr4	9538797	9544467	0.398034	0.329196	NA	1800	interaction289321	4-9548000	+	526	4-9544000	+	390	3996	18	0.069862	-37.697331	0	8	0.069862	800	-11.536337	778	448	-5.68333	1000	1000	14	-1.53638	0.000183322470094043	2.61975	7.22284784353196e-50
18534000	18536000	AT4G39960	NA	Chr4	18533754	18536618	0.776497	0.661609	18524000	18526000	AT4G39950	Chr4	18525245	18527579	3.79967	3.50424	yes	1500	interaction319880	4-18534000	+	440	4-18524000	+	961	10031	15	0.069862	-29.045416	0	6	0.069862	600	-7.441178	805	1805	-5.6567	900	900	10	1.75784	3.69361336351557e-40	-2.21337	1.09048411276042e-15
16164000	16166000	AT5G40390	NA	Chr5	16161514	16165357	0.840017	0.902619	16152000	16154000	AT5G40380	Chr5	16151771	16155177	2.48611	3.09917	yes	1800	interaction375871	5-16164000	+	932	5-16152000	+	1130	11872	18	0.069862	-37.488955	0	8	0.069862	800	-11.503552	1405	1442	-5.62242	1000	1000	14	-1.1209	2.81076393547227e-13	6.954	5.24742967861004e-78
15586000	15588000	AT2G37090	NA	Chr2	15587393	15589257	0.901633	0.938524	15570000	15572000	AT2G37050	Chr2	15568985	15573726	0.755074	0.71689	NA	1000	interaction157294	2-15586000	+	418	2-15570000	+	1382	15564	10	0.069862	-16.097775	0.000755	3	0.069862	300	-2.523976	572	2255	-5.60013	700	700	6	-2.21963	3.80351312361147e-11	-0.723304	4.42731371934023e-06
12816000	12818000	AT2G30020	NA	Chr2	12814409	12816088	0.748971	0.875619	12806000	12808000	AT2G30010	Chr2	12805723	12809386	0.797055	1.28983	yes	1000	interaction147512	2-12816000	+	508	2-12806000	+	632	8861	10	0.069862	-16.082091	0.000761	3	0.069862	300	-2.52377	637	913	-5.59724	700	700	6	1.1557	0.023155252471405	3.93213	1.86880924722991e-162
19236000	19238000	AT1G51820	yes	Chr1	19237406	19241883	2.04328	2.14386	19222000	19224000	AT1G51805	Chr1	19220976	19225690	1.62494	2.48797	yes	1000	interaction64633	1-19236000	+	462	1-19222000	+	967	14032	10	0.069862	-16.089338	0.000759	3	0.069862	300	-2.523615	697	1191	-5.59504	700	700	6	1.48462	3.50273617468003e-07	7.1917	1.37600524771529e-223
3974000	3976000	AT5G12290	NA	Chr5	3974170	3978160	0.804557	0.786955	3972000	3974000	AT5G12280	Chr5	3971799	3973644	1.44835	1.11124	yes	22502.449123	interaction333579	5-3974000	+	1776	5-3972000	+	2043	2195	241	0.074822	-1102.43174	0	395	0.145035	19026.758773	-1998.591273	3000	3854	-5.59337	3475.69035	3475.69	412	-0.488363	4.53506404809942e-06	-2.69259	2.13050769814757e-09
8240000	8242000	AT5G24270	NA	Chr5	8238533	8243357	0.916167	0.999006	8218000	8220000	AT5G24210	Chr5	8217334	8219619	2.3401	4.24263	yes	1000	interaction348462	5-8240000	+	511	5-8218000	+	1486	21460	10	0.069862	-16.081664	0.000761	3	0.069862	300	-2.523328	844	2098	-5.591	700	700	6	-2.22122	7.40949575887603e-11	7.03964	1.30803500995815e-81
6868000	6870000	AT4G11290	yes	Chr4	6869952	6871661	2.79292	2.70159	6854000	6856000	AT4G11270	Chr4	6854363	6859664	0.703813	0.620717	NA	1000	interaction280099	4-6868000	+	392	4-6854000	+	1391	13708	10	0.069862	-16.103661	0.000752	3	0.069862	300	-2.523307	857	2349	-5.59071	700	700	6	-3.0148	2.08593932743323e-25	-0.246232	0.0239984798027918
16124000	16126000	AT4G33520	NA	Chr4	16118895	16126151	0.690473	0.650343	16106000	16108000	AT4G33480	Chr4	16105610	16108646	0.795983	0.653587	NA	1000	interaction312169	4-16124000	+	549	4-16106000	+	1572	17588	10	0.069862	-16.076662	0.000762	3	0.069862	300	-2.523302	860	2484	-5.59065	700	700	6	1.52646	6.96908326177227e-25	1.77732	1.55741115242606e-49
14580000	14582000	AT4G29780	NA	Chr4	14579703	14581700	0.627698	0.956299	14564000	14566000	AT4G29735	Chr4	14562638	14564378	0.798966	0.777148	NA	1000	interaction306955	4-14580000	+	1043	4-14564000	+	660	15787	10	0.069862	-16.065371	0.000763	3	0.069862	300	-2.523032	1630	1078	-5.58685	700	700	6	1.53551	8.63596924630094e-05	-0.572005	9.03291842239289e-05
5770000	5772000	AT5G17510	yes	Chr5	5769972	5772395	0.895597	0.804704	5754000	5756000	AT5G17450	Chr5	5755321	5756888	1.71989	1.48324	yes	1000	interaction339898	5-5770000	+	1084	5-5754000	+	711	16447	10	0.069862	-16.061371	0.000763	3	0.069862	300	-2.522868	1933	1275	-5.58454	700	700	6	0.474543	0.026347093244521	1.19437	0.0023106767736113
18284000	18286000	AT3G49310	yes	Chr3	18284856	18288059	0.870981	0.809232	18262000	18264000	AT3G49260	Chr3	18262398	18266021	1.17489	2.69372	yes	1000	interaction237370	3-18284000	+	696	3-18262000	+	1142	22134	10	0.069862	-16.062486	0.000763	3	0.069862	300	-2.522825	1338	1502	-5.58395	700	700	6	-0.506882	2.85862865182966e-08	8.03794	1.08164056107214e-69
6440000	6442000	AT1G18700	NA	Chr1	6437476	6444076	0.81829	0.797651	6422000	6424000	AT1G18660	Chr1	6421116	6425880	0.865061	0.737301	NA	1000	interaction22659	1-6440000	+	1241	1-6422000	+	1036	18402	10	0.069862	-16.045168	0.000763	3	0.069862	300	-2.522778	1696	1416	-5.58329	700	700	6	0.316851	0.00123401318397213	1.16778	2.31516184067938e-10
19272000	19274000	AT1G51880	yes	Chr1	19270192	19274068	2.15673	2.95586	19210000	19212000	AT1G51790	Chr1	19206710	19211417	0.642398	0.791469	yes	1000	interaction64857	1-19272000	+	2182	1-19210000	+	1021	62165	10	0.069862	-16.045688	0.000763	3	0.069862	300	-2.522764	3430	1441	-5.58309	700	700	6	-5.75359	8.00641733934526e-38	-1.88893	9.2340838968072e-06
17466000	17468000	AT3G47400	yes	Chr3	17465589	17468118	1.86172	2.63511	17438000	17440000	AT3G47340	Chr3	17437883	17441243	0.768005	0.716034	NA	1000	interaction234296	3-17466000	+	1883	3-17438000	+	1328	28163	10	0.069862	-16.037393	0.000763	3	0.069862	300	-2.522688	2964	1593	-5.58203	700	700	6	-2.30949	3.45044041557041e-31	5.50478	1.69868612510841e-09
762000	764000	AT1G03160	NA	Chr1	761281	766158	0.846651	0.6735	732000	734000	AT1G03080	Chr1	731610	738056	0.670108	0.688894	NA	1000	interaction2489	1-762000	+	1203	1-732000	+	1366	30007	10	0.069862	-16.040258	0.000763	3	0.069862	300	-2.522647	1690	2340	-5.58145	700	700	6	2.37637	2.52894816312805e-63	-1.12717	3.01299459744814e-09
12512000	12514000	AT2G29120	yes	Chr2	12511291	12515895	2.6238	2.30407	12448000	12450000	AT2G28970	Chr2	12443918	12448163	2.60862	3.17103	yes	900	interaction146176	2-12512000	+	1753	2-12448000	+	1694	64062	9	0.069862	-13.714335	0.007132	3	0.07132	293.866902	-2.522452	2367	2402	-5.57873	606.133098	606.133	4	3.11009	8.84571001744571e-10	-5.31659	4.18982468697422e-130
2084000	2086000	AT5G06740	yes	Chr5	2084093	2086052	0.989645	0.78647	2038000	2040000	AT5G06640	Chr5	2039858	2041928	1.06086	1.74093	yes	900	interaction327119	5-2084000	+	2045	5-2038000	+	851	45829	9	0.069862	-13.731034	0.007132	4	0.093996	297.298138	-3.96583	4382	1710	-5.54881	602.701862	602.702	4	-5.21082	1.40661301384844e-28	-5.57918	6.7606453549426e-40
6846000	6848000	AT5G20280	NA	Chr5	6844713	6850154	0.787978	0.661643	6834000	6836000	AT5G20250	Chr5	6833658	6836782	0.739494	0.870499	NA	3800	interaction343706	5-6846000	+	1949	5-6834000	+	1515	12043	38	0.069862	-104.386025	0	23	0.069862	2300	-52.68494	2710	1925	-5.48822	1500	1500	38	0.98447	1.30188594802346e-18	1.47007	0.000128440411041474
17710000	17712000	AT2G42540	yes	Chr2	17711031	17712330	2.00007	3.30288	17706000	17708000	AT2G42520	Chr2	17704831	17708947	0.737316	0.877569	NA	5500	interaction164671	2-17710000	+	1567	2-17706000	+	448	4731	55	0.069862	-172.64781	0	37	0.069862	3700	-101.117386	2150	788	-5.47335	1800	1800	64	6.96599	8.21759640528002e-35	0.23798	0.0189078102790526
12508000	12510000	AT2G29110	yes	Chr2	12506879	12510552	2.10031	2.2937	12496000	12498000	AT2G29090	Chr2	12494850	12499723	1.91476	3.36225	yes	4980.729485	interaction146149	2-12508000	+	2632	2-12496000	+	1318	12179	51	0.071535	-154.332568	0	40	0.083192	3359.063786	-111.734671	3892	1704	-5.44343	1621.665699	1621.67	56	-2.08381	0.0123179555707828	5.60489	3.66061741036352e-23
3228000	3230000	AT1G09930	yes	Chr1	3227489	3230043	2.08826	1.66754	3210000	3212000	AT1G09880	Chr1	3208827	3211653	0.648254	0.618039	yes	1632.796425	interaction11516	1-3228000	+	2657	1-3210000	+	1718	18095	22	0.094131	-49.549875	0	23	0.186107	863.389059	-52.643461	5067	2928	-5.43793	769.407366	769.407	18	-3.24334	0.000662543924739576	-1.21453	0.00565386755568405
25290000	25292000	AT1G67500	NA	Chr1	25287706	25296937	0.642623	0.628914	25270000	25272000	AT1G67460	Chr1	25269625	25271861	0.956297	0.828667	yes	1600	interaction85534	1-25290000	+	2059	1-25270000	+	1609	20121	16	0.069862	-31.677215	0	13	0.121889	745.108655	-23.50009	3162	3073	-5.41575	854.891345	854.891	10	-1.03578	5.81599355284701e-06	0.867474	0.0300367359667032
270000	272000	AT3G01750	NA	Chr3	270228	272976	0.58548	0.615166	248000	250000	AT3G01670	Chr3	247233	250470	0.621457	0.711616	NA	1101.727045	interaction171960	3-270000	+	2099	3-248000	+	2051	22444	14	0.088776	-26.160875	0	11	0.159756	481.036066	-18.429333	3759	3388	-5.40494	620.690979	620.691	8	0.938833	3.03999459643706e-11	0.592721	0.0082067946495729
7440000	7442000	AT1G21250	NA	Chr1	7439265	7442113	0.542914	1.42423	7426000	7428000	AT1G21210	Chr1	7424105	7427041	0.503348	0.580392	NA	3995.523275	interaction26098	1-7440000	+	2394	1-7426000	+	1948	13627	55	0.096168	-170.051483	0	51	0.129945	2741.89701	-153.779537	3165	3273	-5.37989	1253.626265	1253.63	62	4.1292	0.00267596517479947	-2.57465	1.88572950775891e-06
12690000	12692000	AT2G29680	NA	Chr2	12689548	12693024	0.68892	0.655016	12684000	12686000	AT2G29670	Chr2	12681957	12685087	0.818327	0.87505	NA	2600	interaction146906	2-12690000	+	1792	2-12684000	+	624	6178	26	0.069862	-62.712733	0	14	0.069862	1400	-26.217161	2327	834	-5.36785	1200	1200	22	0.75464	0.0150061184921884	5.03881	9.41713087699423e-104
9500000	9502000	AT4G16890	NA	Chr4	9500505	9505455	0.596102	0.578236	9488000	9490000	AT4G16860	Chr4	9488465	9495816	0.753631	0.663132	NA	2600	interaction289067	4-9500000	+	1195	4-9488000	+	1850	12053	26	0.069862	-62.477392	0	14	0.069862	1400	-26.183675	1288	1980	-5.3416	1200	1200	22	2.55938	2.02741479868906e-44	3.98441	5.62444500461666e-89
18290000	18292000	AT5G45200	yes	Chr5	18283966	18290332	2.56766	2.75378	18260000	18262000	AT5G45150	Chr5	18260440	18264346	0.536643	0.606073	NA	1100	interaction382665	5-18290000	+	2186	5-18260000	+	1284	29922	11	0.069862	-18.451391	7.4e-05	6	0.098278	426.515236	-7.433323	3794	2065	-5.33672	673.484764	673.485	6	-5.13828	2.58913987951404e-15	0.959186	0.00604857026063387
21928000	21930000	AT5G54040	yes	Chr5	21928846	21930637	2.61756	2.99639	21922000	21924000	AT5G54020	Chr5	21921863	21923534	2.05313	2.0504	yes	6681.836865	interaction394854	5-21928000	+	1729	5-21922000	+	2258	6222	77	0.080507	-263.226186	0	145	0.206404	4907.838639	-583.831566	3721	4422	-5.30798	1773.998226	1774	98	-4.83936	7.57037721911891e-16	-4.88759	4.8366299666038e-19
9976000	9978000	AT2G23430	NA	Chr2	9976745	9978021	0.738329	0.874003	9966000	9968000	AT2G23410	Chr2	9966129	9967772	1.53662	2.36871	yes	1300	interaction137612	2-9976000	+	308	2-9966000	+	1006	9677	13	0.069862	-23.697524	0	5	0.069862	500	-5.623106	494	1433	-5.25812	800	800	8	0.88676	2.56458593868605e-05	-6.36368	5.41646938111326e-19
8188000	8190000	AT1G23090	yes	Chr1	8184951	8189064	1.04639	1.4486	8182000	8184000	AT1G23080	Chr1	8180576	8183570	0.786898	0.912858	yes	4000	interaction28620	1-8188000	+	829	1-8182000	+	1207	5935	40	0.069862	-112.205665	0	25	0.069862	2500	-59.1804	1289	1621	-5.24745	1500	1500	42	4.26765	9.09013521915651e-41	2.01809	6.48920664249694e-69
20338000	20340000	AT5G49990	NA	Chr5	20337640	20341881	0.654422	0.644212	20328000	20330000	AT5G49970	Chr5	20329186	20333155	0.832983	0.689798	NA	1300	interaction389668	5-20338000	+	549	5-20328000	+	760	9473	13	0.069862	-23.600495	1e-06	5	0.069862	500	-5.617386	893	1276	-5.23716	800	800	8	-0.568401	0.0469486917093269	1.18166	1.52892495136793e-21
14008000	14010000	AT4G28270	NA	Chr4	14007538	14009019	0.739066	0.797448	13998000	14000000	AT4G28240	Chr4	13997291	13998347	0.656513	0.897546	yes	1300	interaction304989	4-14008000	+	614	4-13998000	+	594	9717	13	0.069862	-23.591173	1e-06	5	0.069862	500	-5.617246	1066	911	-5.23665	800	800	8	0.384114	0.00993814743157441	0.362723	0.0293219417815587
15636000	15638000	AT4G32390	yes	Chr4	15636414	15638040	0.81806	0.732897	15618000	15620000	AT4G32350	Chr4	15617465	15620910	0.708448	0.795396	NA	1300	interaction310428	4-15636000	+	1193	4-15618000	+	770	17662	13	0.069862	-23.565244	1e-06	5	0.069862	500	-5.616082	2172	1095	-5.23241	800	800	8	-0.610526	0.0331233556846323	0.418908	0.0101094156876388
25394000	25396000	AT1G67740	yes	Chr1	25394067	25395154	0.67296	1.21835	25378000	25380000	AT1G67710	Chr1	25376750	25379144	1.48509	1.14429	yes	1300	interaction85886	1-25394000	+	788	1-25378000	+	1085	16189	13	0.069862	-23.563249	1e-06	5	0.069862	500	-5.615713	1170	2108	-5.23107	800	800	8	7.11907	1.50821971762321e-195	-3.18011	4.33008713625758e-27
29186000	29188000	AT1G77660	NA	Chr1	29185898	29187825	0.762057	0.759046	29174000	29176000	AT1G77630	Chr1	29173456	29175530	0.673396	0.688152	NA	1300	interaction98254	1-29186000	+	832	1-29174000	+	677	12638	13	0.069862	-23.577253	1e-06	5	0.069862	500	-5.615397	1564	1243	-5.22991	800	800	8	-0.645079	0.000129321744416166	1.49864	4.55090853827142e-27
4106000	4108000	AT5G12980	NA	Chr5	4105382	4108184	0.722261	0.717929	4102000	4104000	AT5G12970	Chr5	4102134	4105327	0.523779	0.586069	NA	16600	interaction334100	5-4106000	+	1488	5-4102000	+	2255	3929	166	0.069862	-696.514001	0	230	0.117814	13638.724695	-1036.075721	2522	3724	-5.22226	2961.275305	2961.28	260	0.495514	0.00264275280123503	-3.54154	7.74384335671615e-56
23626000	23628000	AT1G63700	yes	Chr1	23624665	23629112	0.84574	0.707138	23604000	23606000	AT1G63660	Chr1	23603934	23607275	0.648213	0.629894	NA	1100	interaction79342	1-23626000	+	1685	1-23604000	+	1739	21518	11	0.069862	-18.442927	7.4e-05	5	0.081444	428.896306	-5.612933	2419	2684	-5.22097	671.103694	671.104	6	0.430874	0.000901994317630334	-0.397091	0.0469275165600994
16132000	16134000	AT4G33540	NA	Chr4	16130823	16133960	0.785377	0.727395	16106000	16108000	AT4G33480	Chr4	16105610	16108646	0.795983	0.653587	NA	1100	interaction312202	4-16132000	+	1579	4-16106000	+	1572	26097	11	0.069862	-18.444874	7.4e-05	5	0.080361	434.678092	-5.612865	2579	2484	-5.19989	665.321908	665.322	6	0.984381	6.68940803551531e-09	1.77732	1.55741115242606e-49
11550000	11552000	AT2G27060	NA	Chr2	11551040	11554775	0.739806	0.586508	11546000	11548000	AT2G27050	Chr2	11545752	11548293	0.704352	0.728842	NA	4100	interaction142842	2-11550000	+	464	2-11546000	+	1321	4001	41	0.069862	-116.745881	0	26	0.069862	2600	-62.660858	697	2078	-5.19761	1500	1500	42	1.19266	1.32072590591228e-07	1.20123	9.21855606369793e-26
13672000	13674000	AT4G27300	yes	Chr4	13669307	13672348	0.924247	0.951683	13654000	13656000	AT4G27260	Chr4	13653608	13656204	0.762011	0.774361	NA	1600	interaction303791	4-13672000	+	990	4-13654000	+	1670	18177	16	0.069862	-31.718579	0	7	0.069862	700	-9.404328	1456	2447	-5.18529	900	900	10	5.23805	1.80243843901158e-201	1.16408	2.09446056557826e-23
7336000	7338000	AT2G16920	NA	Chr2	7334225	7339167	0.696448	0.731058	7310000	7312000	AT2G16870	Chr2	7308076	7311686	0.674014	0.603318	NA	1600	interaction128453	2-7336000	+	1287	2-7310000	+	1176	26637	16	0.069862	-31.701551	0	7	0.069862	700	-9.40184	2244	1904	-5.18032	900	900	10	-0.470267	1.23600530955677e-08	-1.49655	2.33277698416074e-16
1800000	1802000	AT5G05980	NA	Chr5	1799489	1804492	0.7189	0.749311	1782000	1784000	AT5G05930	Chr5	1779973	1783412	0.811923	0.731532	NA	1600	interaction326274	5-1800000	+	1221	5-1782000	+	1194	17983	16	0.069862	-31.700186	0	7	0.069862	700	-9.401368	2199	2022	-5.17938	900	900	10	-0.490109	0.000154004756653374	1.08692	1.99985834648421e-15
13958000	13960000	AT4G28085	NA	Chr4	13959969	13960574	0.741237	0.837278	13956000	13958000	AT4G28080	Chr4	13948602	13957840	0.772338	0.629519	NA	4100	interaction304829	4-13958000	+	830	4-13956000	+	631	1649	41	0.069862	-116.275695	0	26	0.069862	2600	-62.54996	1172	931	-5.15853	1500	1500	42	-0.888771	0.000326878814859991	5.5523	2.59562893815667e-187
15978000	15980000	AT1G42550	NA	Chr1	15977013	15979952	0.727585	0.469049	15974000	15976000	AT1G42540	Chr1	15973053	15976703	0.665532	0.475561	NA	5300	interaction53072	1-15978000	+	558	1-15974000	+	992	3214	53	0.069862	-163.770878	0	36	0.069862	3600	-97.428896	821	1382	-5.11535	1700	1700	60	5.03116	7.25482905957067e-223	1.05705	3.11875364091459e-22
18454000	18456000	AT5G45530	yes	Chr5	18454315	18457277	1.3711	1.55411	18450000	18452000	AT5G45520	Chr5	18449508	18453012	0.488989	0.548379	NA	17171.627958	interaction383258	5-18454000	+	2265	5-18450000	+	1986	3893	228	0.092761	-1027.9647	0	308	0.14745	14593.074323	-1476.595825	3619	3248	-5.07759	2578.553635	2578.55	384	5.01884	1.60326483562649e-14	4.72077	1.58830379545489e-26
22084000	22086000	AT3G59770	NA	Chr3	22079032	22086149	0.741438	0.714969	22052000	22054000	AT3G59700	Chr3	22052132	22054275	0.600207	0.624232	NA	1100	interaction250742	3-22084000	+	1285	3-22052000	+	1647	31663	11	0.069862	-18.451363	7.4e-05	6	0.094553	443.321552	-7.432932	2240	3365	-5.06494	656.678448	656.678	6	-0.46592	1.14847805785887e-10	-2.04227	7.62346965342177e-07
10722000	10724000	AT2G25170	NA	Chr2	10713806	10723986	0.814607	0.731178	10694000	10696000	AT2G25130	Chr2	10695181	10697000	1.32317	1.43538	yes	1100	interaction140144	2-10722000	+	1476	2-10694000	+	2045	27795	11	0.069862	-18.446763	7.4e-05	6	0.094381	444.127305	-7.432748	2333	3225	-5.05033	655.872695	655.873	6	0.509542	0.00905829422291053	-1.5474	0.00022631806628964
19388000	19390000	AT1G52110	yes	Chr1	19386788	19389740	2.65858	3.49375	19272000	19274000	AT1G51880	Chr1	19270192	19274068	2.15673	2.95586	yes	1100	interaction65316	1-19388000	+	1230	1-19272000	+	2182	115931	11	0.069862	-18.452953	7.4e-05	6	0.093582	447.918036	-7.43307	2175	3430	-4.99396	652.081964	652.082	6	-4.99308	5.83265146010197e-08	-5.75359	8.00641733934526e-38
10054000	10056000	AT2G23630	yes	Chr2	10052565	10055317	1.80232	1.93842	10044000	10046000	AT2G23610	Chr2	10044178	10046532	1.11089	1.09557	yes	1700	interaction137847	2-10054000	+	1464	2-10044000	+	311	10309	17	0.069862	-34.843222	0	8	0.069862	800	-11.534271	2445	468	-4.86689	900	900	12	-5.60009	1.10651418436313e-14	-0.379006	0.000865226109155758
3212000	3214000	AT3G10360	NA	Chr3	3210883	3215556	0.712071	0.64677	3206000	3208000	AT3G10340	Chr3	3204012	3208022	2.67287	1.63401	yes	10472.10565	interaction182258	3-3212000	+	2437	3-3206000	+	2124	5756	160	0.10674	-662.548484	0	228	0.184489	8633.893392	-1021.361286	3843	3827	-4.84957	1838.212258	1838.21	248	0.539767	0.00129771611259166	-2.1773	1.08292585215227e-07
2136000	2138000	AT3G06770	NA	Chr3	2134799	2137228	0.724152	0.65039	2132000	2134000	AT3G06760	Chr3	2132757	2134556	0.685902	0.702738	NA	5600	interaction178281	3-2136000	+	859	3-2132000	+	815	3303	56	0.069862	-175.202154	0	39	0.069862	3900	-108.266108	1188	1080	-4.83891	1700	1700	64	1.7527	3.03586626661738e-36	0.869192	3.39603870624934e-08
622000	624000	AT4G01460	yes	Chr4	620758	622945	2.58878	4.46943	608000	610000	AT4G01450	Chr4	608453	610724	3.12659	1.67959	yes	1100	interaction257229	4-622000	+	434	4-608000	+	569	12954	11	0.069862	-18.521541	7.3e-05	4	0.069862	400	-3.968429	721	959	-4.83466	700	700	6	5.94658	1.49379343563303e-76	-2.33448	2.89072430883101e-30
20788000	20790000	AT3G56010	NA	Chr3	20788669	20789924	0.805984	0.750555	20776000	20778000	AT3G55980	Chr3	20776294	20778842	0.859224	0.965798	NA	1100	interaction245756	3-20788000	+	527	3-20776000	+	864	11949	11	0.069862	-18.502753	7.3e-05	4	0.069862	400	-3.967385	939	1262	-4.82935	700	700	6	3.42527	8.02659145009105e-56	1.67518	6.84694432294927e-08
7726000	7728000	AT2G17780	yes	Chr2	7724884	7727404	0.971359	1.3359	7704000	7706000	AT2G17730	Chr2	7703855	7705750	0.662989	0.689625	NA	1100	interaction129869	2-7726000	+	1400	2-7704000	+	593	22253	11	0.069862	-18.49302	7.4e-05	4	0.069862	400	-3.967363	2199	945	-4.82924	700	700	6	5.62493	2.78883475964231e-86	0.693233	0.00537183618556989
19254000	19256000	AT1G51850	yes	Chr1	19252846	19256783	1.8269	2.22887	19224000	19226000	AT1G51805	Chr1	19220976	19225690	1.62494	2.48797	yes	1100	interaction64718	1-19254000	+	1109	1-19224000	+	829	29685	11	0.069862	-18.470959	7.4e-05	4	0.069862	400	-3.967265	1860	973	-4.82874	700	700	6	-2.49075	7.10242737769867e-09	7.1917	1.37600524771529e-223
18538000	18540000	AT3G50010	NA	Chr3	18537182	18539601	0.68373	0.7324	18502000	18504000	AT3G49900	Chr3	18500574	18502725	0.775128	0.995469	NA	1100	interaction238101	3-18538000	+	1496	3-18502000	+	634	35597	11	0.069862	-18.488	7.4e-05	4	0.069862	400	-3.967038	2593	1044	-4.82759	700	700	6	-2.78098	2.51749028547261e-11	2.70998	9.43001966627497e-16
16470000	16472000	AT1G43670	NA	Chr1	16468043	16470500	0.775072	0.662656	16430000	16432000	AT1G43620	Chr1	16425411	16430200	0.644399	0.531782	NA	1100	interaction54853	1-16470000	+	747	1-16430000	+	1716	39360	11	0.069862	-18.477035	7.4e-05	4	0.069862	400	-3.967009	1054	2134	-4.82744	700	700	6	3.33586	2.9573872469204e-64	0.539885	5.45648126625006e-05
2710000	2712000	AT1G08560	NA	Chr1	2709631	2710912	0.618621	0.647108	2694000	2696000	AT1G08510	Chr1	2691079	2694377	0.702638	0.743654	NA	1100	interaction9695	1-2710000	+	1025	1-2694000	+	871	15244	11	0.069862	-18.468292	7.4e-05	4	0.069862	400	-3.966139	1580	1470	-4.82303	700	700	6	0.801212	3.71099950693455e-06	0.410402	1.85157064356082e-06
2064000	2066000	AT5G06700	NA	Chr5	2063486	2066039	0.808852	0.731966	2052000	2054000	AT5G06670	Chr5	2048242	2055019	0.71733	0.682193	NA	1100	interaction327071	5-2064000	+	1007	5-2052000	+	969	11302	11	0.069862	-18.462972	7.4e-05	4	0.069862	400	-3.966114	1649	1487	-4.8229	700	700	6	1.50031	5.72410273117405e-18	1.36366	1.3797081618539e-28
18156000	18158000	AT4G38950	yes	Chr4	18154394	18159936	0.633689	0.730205	18130000	18132000	AT4G38860	Chr4	18130267	18131060	1.39181	3.23496	yes	1100	interaction318801	4-18156000	+	2133	4-18130000	+	1568	26032	11	0.069862	-18.444948	7.4e-05	4	0.069862	400	-3.965839	3145	1702	-4.82151	700	700	6	1.40581	0.00148519016281298	5.49422	1.66160889311186e-20
19276000	19278000	AT1G51890	yes	Chr1	19274657	19278528	1.13278	1.54085	19216000	19218000	AT1G51800	Chr1	19214147	19217970	0.895504	1.10386	yes	1100	interaction64893	1-19276000	+	1145	1-19216000	+	1614	60194	11	0.069862	-18.455713	7.4e-05	4	0.069862	400	-3.965741	1795	1999	-4.82101	700	700	6	-2.8958	4.27073054283895e-14	-1.22176	0.000697390718735551
22692000	22694000	AT1G61500	NA	Chr1	22689728	22692881	0.565041	0.559181	22686000	22688000	AT1G61490	Chr1	22685153	22688267	0.481692	0.57372	NA	10900	interaction76185	1-22692000	+	1964	1-22686000	+	1680	5574	109	0.069862	-410.130681	0	119	0.096583	8607.694963	-456.572856	2809	2741	-4.81304	2292.305037	2292.31	152	1.16092	1.60592835920415e-10	-0.578744	0.0422435758898071
9508000	9510000	AT4G16892	NA	Chr4	9506321	9508337	0.577603	0.599978	9502000	9504000	AT4G16890	Chr4	9500505	9505455	0.596102	0.578236	NA	7000	interaction289109	4-9508000	+	2355	4-9502000	+	1125	5925	70	0.069862	-233.556223	0	51	0.069862	5100	-154.376566	2873	1260	-4.80952	1900	1900	86	2.88438	6.73194512868525e-12	2.55938	2.02741479868906e-44
18872000	18874000	AT2G45850	NA	Chr2	18871478	18873972	0.776714	0.699117	18866000	18868000	AT2G45830	Chr2	18866060	18868542	2.22013	0.976409	yes	2900	interaction168440	2-18872000	+	637	2-18866000	+	598	6191	29	0.069862	-72.867071	0	17	0.069862	1700	-34.564254	1043	1054	-4.78882	1200	1200	26	4.57788	4.19035484863228e-232	-2.12778	1.00451510162087e-27
17470000	17472000	AT5G43500	NA	Chr5	17469674	17473591	0.677094	0.591509	17462000	17464000	AT5G43470	Chr5	17462546	17467448	0.637713	1.07038	NA	2900	interaction380134	5-17470000	+	863	5-17462000	+	1309	7575	29	0.069862	-72.666968	0	17	0.069862	1700	-34.549659	1192	1671	-4.78124	1200	1200	26	0.530152	0.00021164476164748	4.36539	5.9774815490012e-254
21176000	21178000	AT1G56520	yes	Chr1	21174663	21178974	1.14379	2.14797	21164000	21166000	AT1G56500	Chr1	21159743	21167321	0.857098	0.765229	NA	2900	interaction71174	1-21176000	+	1795	1-21164000	+	1317	11940	29	0.069862	-72.512784	0	17	0.069862	1700	-34.530146	1926	1474	-4.77115	1200	1200	26	6.81212	1.85283684800453e-72	4.0111	3.33265162847515e-131
3182000	3184000	AT5G10150	NA	Chr5	3181982	3183865	0.887181	1.06702	3166000	3168000	AT5G10110	Chr5	3166438	3168297	0.881997	0.755168	yes	1400	interaction330927	5-3182000	+	1083	5-3166000	+	985	15898	14	0.069862	-26.202579	0	6	0.069862	600	-7.434201	1773	1757	-4.74302	800	800	8	5.63001	2.13226516506953e-147	0.365913	0.00885849755448707
21160000	21162000	AT3G57170	NA	Chr3	21159406	21163184	0.809232	0.77256	21148000	21150000	AT3G57130	Chr3	21147557	21150027	4.52818	5.63016	yes	1400	interaction247078	3-21160000	+	1107	3-21148000	+	1228	12179	14	0.069862	-26.193717	0	6	0.069862	600	-7.434165	1768	2358	-4.74294	800	800	8	0.408483	7.96892932762202e-05	3.03883	2.19546632024547e-10
16970000	16972000	AT3G46200	yes	Chr3	16969265	16971204	0.767623	0.808672	16944000	16946000	AT3G46130	Chr3	16945363	16946461	0.921496	1.09927	yes	1400	interaction232377	3-16970000	+	1172	3-16944000	+	1326	25859	14	0.069862	-26.189752	0	6	0.069862	600	-7.433878	1859	2069	-4.74229	800	800	8	-0.506494	0.0207436117194345	-2.539	7.31755056370195e-43
15330000	15332000	AT4G31650	NA	Chr4	15331139	15333321	0.57288	0.559719	15298000	15300000	AT4G31570	Chr4	15297013	15306410	0.750304	0.680832	NA	1200	interaction309469	4-15330000	+	1580	4-15298000	+	1692	31925	12	0.069862	-20.942827	7e-06	6	0.080896	518.164155	-7.432505	2468	2613	-4.73922	681.835845	681.836	6	1.21901	1.54273012440791e-08	-0.458193	0.00163032084316191
5934000	5936000	AT2G14100	yes	Chr2	5934555	5936371	0.819486	0.860895	5924000	5926000	AT2G14080	Chr2	5925185	5929600	0.966447	1.85291	yes	2100	interaction123056	2-5934000	+	977	2-5924000	+	889	9966	21	0.069862	-46.549771	0	11	0.069862	1100	-18.463366	1573	961	-4.72084	1000	1000	16	-5.36289	2.21524302186654e-31	4.35706	6.58755995903743e-183
17404000	17406000	AT2G41720	NA	Chr2	17403602	17407135	0.718988	0.605845	17384000	17386000	AT2G41700	Chr2	17382889	17396110	0.896531	0.810558	NA	1700	interaction163556	2-17404000	+	1687	2-17384000	+	1669	20732	17	0.069862	-34.520524	0	11	0.087005	883.257406	-18.433934	2524	2748	-4.65315	816.742594	816.743	12	2.32813	3.8554343361302e-78	-0.20774	0.00727362348910528
26918000	26920000	AT1G71420	NA	Chr1	26917821	26920099	0.662869	0.658892	26900000	26902000	AT1G71380	Chr1	26899783	26901789	1.88098	2.46488	yes	3070.22052	interaction90764	1-26918000	+	2071	1-26900000	+	1705	18088	32	0.072815	-82.802021	0	38	0.136074	1950.965254	-104.148718	3347	3241	-4.62286	1119.255267	1119.26	30	0.698191	0.0184410824506468	-4.09069	1.37245172077191e-26
20730000	20732000	AT5G50950	yes	Chr5	20729611	20733926	1.2049	1.56891	20726000	20728000	AT5G50940	Chr5	20724577	20726479	0.909763	0.96671	yes	5300	interaction390754	5-20730000	+	1461	5-20726000	+	715	3595	53	0.069862	-163.216593	0	37	0.069862	3700	-101.07557	1638	830	-4.61927	1600	1600	60	6.1271	1.40186331499601e-79	1.16245	0.000401902225450875
4894000	4896000	AT3G14570	yes	Chr3	4892642	4902628	0.809788	0.622274	4884000	4886000	AT3G14550	Chr3	4884565	4885982	0.377371	0.404572	NA	3000	interaction188286	3-4894000	+	1954	3-4884000	+	1624	9453	30	0.069862	-75.877399	0	23	0.085399	1881.551523	-52.658132	2754	2472	-4.5787	1118.448477	1118.45	28	-1.40591	1.01429426335341e-06	-0.972949	8.65833565821359e-05
12508000	12510000	AT2G29110	yes	Chr2	12506879	12510552	2.10031	2.2937	12454000	12456000	AT2G28990	Chr2	12455054	12459541	3.0457	3.7813	yes	861.811315	interaction146132	2-12508000	+	2632	2-12454000	+	2091	53998	14	0.11349	-26.16014	0	10	0.167654	416.703894	-16.020519	3892	3434	-4.56389	445.107421	445.107	8	-2.08381	0.0123179555707828	-5.99013	2.00176333203294e-41
24044000	24046000	AT1G64710	NA	Chr1	24044544	24046552	0.716109	0.768194	24040000	24042000	AT1G64700	Chr1	24039809	24040595	2.12446	1.65022	yes	9000	interaction80783	1-24044000	+	1507	1-24040000	+	1256	4435	90	0.069862	-322.338346	0	69	0.069862	6900	-228.281482	2086	2085	-4.55684	2100	2100	120	5.06858	7.67517054352852e-66	-0.814391	0.0279957786166069
21872000	21874000	AT5G53880	NA	Chr5	21872793	21873303	0.790067	1.20587	21866000	21868000	AT5G53860	Chr5	21865267	21868948	0.845683	0.705552	NA	6800	interaction394669	5-21872000	+	857	5-21866000	+	1810	5702	68	0.069862	-225.594969	0	50	0.069862	5000	-150.630104	1021	2783	-4.54419	1800	1800	84	3.00036	2.89935919133197e-34	1.8286	1.73075062593389e-53
16164000	16166000	AT5G40390	NA	Chr5	16161514	16165357	0.840017	0.902619	16150000	16152000	AT5G40380	Chr5	16151771	16155177	2.48611	3.09917	yes	1800	interaction375870	5-16164000	+	932	5-16150000	+	749	13753	18	0.069862	-37.525291	0	9	0.069862	900	-13.726055	1405	999	-4.53165	900	900	14	-1.1209	2.81076393547227e-13	6.954	5.24742967861004e-78
1020000	1022000	AT5G03830	yes	Chr5	1018337	1020460	1.02401	1.04517	1008000	1010000	AT5G03795	Chr5	1007389	1010473	2.81613	2.61613	yes	1800	interaction323371	5-1020000	+	825	5-1008000	+	1205	12692	18	0.069862	-37.508228	0	9	0.069862	900	-13.716336	1514	2215	-4.5209	900	900	14	0.921669	2.67593430806335e-07	-1.33921	0.00135300769634796
21172000	21174000	AT1G56510	yes	Chr1	21167588	21173632	1.01342	1.77375	21164000	21166000	AT1G56500	Chr1	21159743	21167321	0.857098	0.765229	NA	3100	interaction71146	1-21172000	+	1254	1-21164000	+	1317	7893	31	0.069862	-79.410803	0	19	0.069862	1900	-40.427439	1113	1474	-4.49189	1200	1200	28	7.00144	6.28193826751109e-75	4.0111	3.33265162847515e-131
7002000	7004000	AT1G20200	NA	Chr1	7001200	7004418	0.781842	0.772517	6998000	7000000	AT1G20190	Chr1	6998488	6999817	0.85854	0.752819	NA	15031.273215	interaction24532	1-7002000	+	2038	1-6998000	+	1681	3777	152	0.070646	-623.006902	0	165	0.09233	12484.819417	-687.568578	3024	2434	-4.48828	2546.453798	2546.45	232	-0.252284	0.00221682918570289	0.830434	3.90391637044957e-05
13808000	13810000	AT2G32530	yes	Chr2	13809215	13813570	1.8517	3.00769	13804000	13806000	AT2G32520	Chr2	13805518	13807536	0.823475	0.803225	NA	900	interaction150810	2-13808000	+	603	2-13804000	+	191	3975	9	0.069862	-13.848896	0.006652	3	0.069862	300	-2.525245	875	351	-4.46225	600	600	4	4.52586	1.33096331551956e-66	-0.666596	2.19247770986155e-06
9522000	9524000	AT4G16920	yes	Chr4	9519172	9525691	0.589329	0.647513	9510000	9512000	AT4G16900	Chr4	9511858	9516541	0.627999	0.562104	NA	900	interaction289185	4-9522000	+	276	4-9510000	+	2647	11472	9	0.069862	-13.801687	0.00694	3	0.069862	300	-2.524738	415	3010	-4.45735	600	600	4	-2.32573	3.066915643526e-14	1.16585	7.73801154939317e-22
21746000	21748000	AT1G58602	NA	Chr1	21746353	21765705	0.793677	0.883	21734000	21736000	AT1G58520	Chr1	21729912	21738652	0.726449	0.651718	NA	900	interaction73060	1-21746000	+	1314	1-21734000	+	300	12036	9	0.069862	-13.793258	0.006989	3	0.069862	300	-2.524598	1622	437	-4.456	600	600	4	6.48534	3.72491263006463e-200	0.9433	0.00984720967903111
17718000	17720000	AT2G42570	yes	Chr2	17717366	17720080	1.0922	0.921394	17706000	17708000	AT2G42520	Chr2	17704831	17708947	0.737316	0.877569	NA	900	interaction164701	2-17718000	+	765	2-17706000	+	448	12448	9	0.069862	-13.761392	0.007122	3	0.069862	300	-2.523424	1208	788	-4.44473	600	600	4	-2.47916	9.57893368774146e-72	0.23798	0.0189078102790526
17378000	17380000	AT4G36890	yes	Chr4	17379174	17381780	0.750242	0.776109	17368000	17370000	AT4G36870	Chr4	17368964	17373930	1.23957	4.01192	yes	900	interaction316366	4-17378000	+	569	4-17368000	+	552	9843	9	0.069862	-13.749287	0.007132	3	0.069862	300	-2.523301	1006	861	-4.44355	600	600	4	-0.823276	0.000216407279102023	3.88858	2.36134279072347e-17
25748000	25750000	AT1G68570	yes	Chr1	25746735	25750275	1.03035	1.42832	25714000	25716000	AT1G68530	Chr1	25712587	25714807	2.9966	4.59233	yes	900	interaction87071	1-25748000	+	731	1-25714000	+	1567	34457	9	0.069862	-13.736557	0.007132	3	0.069862	300	-2.523064	1047	1936	-4.44128	600	600	4	2.6459	6.93908804393263e-18	5.52404	1.20386303610506e-48
19990000	19992000	AT3G53990	NA	Chr3	19989336	19991134	0.634265	0.83058	19980000	19982000	AT3G53960	Chr3	19978121	19980959	0.903523	1.66235	yes	900	interaction242959	3-19990000	+	591	3-19980000	+	877	10422	9	0.069862	-13.745852	0.007132	3	0.069862	300	-2.523019	1091	1354	-4.44086	600	600	4	-0.703926	1.27365192494903e-11	2.01711	4.1846863147239e-09
26486000	26488000	AT1G70310	NA	Chr1	26485305	26487435	0.831398	0.776835	26472000	26474000	AT1G70290	Chr1	26471077	26474786	0.836034	0.827036	NA	900	interaction89289	1-26486000	+	698	1-26472000	+	1190	13362	9	0.069862	-13.73841	0.007132	3	0.069862	300	-2.522985	1128	1573	-4.44053	600	600	4	0.179413	0.0189073543453717	0.906768	2.16781578777228e-07
19262000	19264000	AT1G51870	yes	Chr1	19262878	19267001	2.15863	3.00905	19216000	19218000	AT1G51800	Chr1	19214147	19217970	0.895504	1.10386	yes	900	interaction64785	1-19262000	+	798	1-19216000	+	1614	46529	9	0.069862	-13.733267	0.007132	3	0.069862	300	-2.522947	1172	1999	-4.44016	600	600	4	-4.99841	6.17323042450743e-13	-1.22176	0.000697390718735551
17406000	17408000	AT2G41720	NA	Chr2	17403602	17407135	0.718988	0.605845	17394000	17396000	AT2G41700	Chr2	17382889	17396110	0.896531	0.810558	NA	900	interaction163569	2-17406000	+	1056	2-17394000	+	688	11569	9	0.069862	-13.739007	0.007132	3	0.069862	300	-2.522911	1704	1217	-4.43982	600	600	4	2.32813	3.8554343361302e-78	-0.20774	0.00727362348910528
23214000	23216000	AT3G62750	NA	Chr3	23214370	23217045	0.730716	0.548782	23194000	23196000	AT3G62700	Chr3	23190266	23195762	0.800413	0.716215	yes	900	interaction254154	3-23214000	+	991	3-23194000	+	1695	20654	9	0.069862	-13.726286	0.007132	3	0.069862	300	-2.522867	1276	2467	-4.4394	600	600	4	6.87761	0	0.666003	6.68589162291557e-09
19248000	19250000	AT1G51840	yes	Chr1	19249448	19250709	2.94154	2.86121	19216000	19218000	AT1G51800	Chr1	19214147	19217970	0.895504	1.10386	yes	900	interaction64688	1-19248000	+	815	1-19216000	+	1614	32227	9	0.069862	-13.732519	0.007132	3	0.069862	300	-2.522833	1326	1999	-4.43908	600	600	4	-4.47906	4.10692876154488e-81	-1.22176	0.000697390718735551
9744000	9746000	AT5G27600	NA	Chr5	9742575	9747005	0.762141	0.69917	9702000	9704000	AT5G27490	Chr5	9702834	9704719	0.791614	0.684561	NA	900	interaction353528	5-9744000	+	1137	5-9702000	+	799	41712	9	0.069862	-13.733223	0.007132	3	0.069862	300	-2.522794	1670	1388	-4.43871	600	600	4	-0.429751	0.00201812807847838	-0.449373	0.020398578749004
6442000	6444000	AT1G18700	NA	Chr1	6437476	6444076	0.81829	0.797651	6422000	6424000	AT1G18660	Chr1	6421116	6425880	0.865061	0.737301	NA	900	interaction22668	1-6442000	+	1039	1-6422000	+	1036	19291	9	0.069862	-13.725034	0.007132	3	0.069862	300	-2.52278	1413	1416	-4.43857	600	600	4	0.316851	0.00123401318397213	1.16778	2.31516184067938e-10
24782000	24784000	AT5G61670	NA	Chr5	24783503	24785945	0.814418	0.788611	24754000	24756000	AT5G61560	Chr5	24752849	24756718	0.734917	0.664903	NA	900	interaction404158	5-24782000	+	749	5-24754000	+	1063	27633	9	0.069862	-13.735615	0.007132	3	0.069862	300	-2.522714	1537	1582	-4.43794	600	600	4	1.46539	1.09437960050878e-17	2.43365	4.35263534025489e-33
8222000	8224000	AT1G23190	NA	Chr1	8219868	8224469	0.93655	0.780342	8182000	8184000	AT1G23080	Chr1	8180576	8183570	0.786898	0.912858	yes	900	interaction28755	1-8222000	+	1287	1-8182000	+	1207	39975	9	0.069862	-13.721129	0.007132	3	0.069862	300	-2.522675	2169	1621	-4.43757	600	600	4	-0.479034	1.70778475880187e-06	2.01809	6.48920664249694e-69
10862000	10864000	AT4G20070	NA	Chr4	10861454	10864696	0.720016	0.671441	10828000	10830000	AT4G19980	Chr4	10828152	10828536	3.1929	1.5977	yes	900	interaction293654	4-10862000	+	1317	4-10828000	+	906	34493	9	0.069862	-13.728993	0.007132	3	0.069862	300	-2.522666	2245	1642	-4.43749	600	600	4	1.4381	3.10905575874017e-21	-4.87941	3.69385192480362e-13
8926000	8928000	AT4G15660	yes	Chr4	8925805	8926310	3.27089	3.95354	8762000	8764000	AT4G15350	Chr4	8762952	8764594	2.43093	3.95792	yes	900	interaction287059	4-8926000	+	1352	4-8762000	+	1491	163242	9	0.069862	-13.718593	0.007132	3	0.069862	300	-2.522558	1942	2286	-4.43646	600	600	4	6.15565	4.58938872696435e-30	-5.64438	5.00071758949592e-11
16856000	16858000	AT3G45850	NA	Chr3	16855611	16861527	0.736861	0.682851	16794000	16796000	AT3G45750	Chr3	16793610	16797947	0.815121	0.762467	NA	900	interaction231961	3-16856000	+	1373	3-16794000	+	1492	62318	9	0.069862	-13.71827	0.007132	3	0.069862	300	-2.522538	2013	2195	-4.43626	600	600	4	1.06141	7.66630997304369e-07	0.623632	7.05845584704315e-07
9510000	9512000	AT4G16900	NA	Chr4	9511858	9516541	0.627999	0.562104	9496000	9498000	AT4G16880	Chr4	9496184	9497313	0.636018	0.918189	NA	1500	interaction289120	4-9510000	+	2647	4-9496000	+	580	13814	15	0.069862	-28.994136	0	7	0.069862	700	-9.418958	3010	612	-4.39597	800	800	10	1.16585	7.73801154939317e-22	7.48101	6.81002425650426e-49
2080000	2082000	AT3G06650	NA	Chr3	2079032	2083291	0.741789	0.667537	2076000	2078000	AT3G06640	Chr3	2074188	2078317	0.53491	0.516312	NA	11981.944593	interaction178079	3-2080000	+	1553	3-2076000	+	2822	3646	155	0.090374	-639.020239	0	209	0.145853	10010.870071	-920.310261	2704	4300	-4.38682	1971.074522	1971.07	238	0.896053	1.48485929628757e-13	2.2149	2.99425924385214e-09
18852000	18854000	AT5G46490	yes	Chr5	18850775	18853843	0.842107	1.14427	18844000	18846000	AT5G46470	Chr5	18842700	18849741	0.82341	0.673445	NA	4900	interaction384612	5-18852000	+	1138	5-18844000	+	1282	7252	49	0.069862	-146.552166	0	34	0.069862	3400	-89.976635	1256	1743	-4.38552	1500	1500	54	4.23768	5.82437180675689e-44	0.726949	0.00168750164222977
24516000	24518000	AT1G65900	yes	Chr1	24515836	24518487	0.806878	0.869918	24496000	24498000	AT1G65850	Chr1	24494677	24498542	2.76792	3.11791	yes	1500	interaction82832	1-24516000	+	1753	1-24496000	+	669	20112	15	0.069862	-28.972788	0	7	0.069862	700	-9.40908	2117	1005	-4.38077	800	800	10	1.19134	8.44702868720057e-08	-3.47514	2.95833870147107e-08
2932000	2934000	AT3G09550	yes	Chr3	2931864	2934354	0.625758	0.828641	2904000	2906000	AT3G09440	Chr3	2903197	2905729	0.604286	0.805233	NA	868.051216	interaction181147	3-2932000	+	2138	3-2904000	+	2008	27962	11	0.08853	-18.438573	7.4e-05	9	0.162766	386.296312	-13.705545	3552	3653	-4.37354	481.754904	481.755	6	1.58037	5.89732244957519e-08	-0.657317	2.25775032755383e-08
20290000	20292000	AT5G49890	NA	Chr5	20288118	20292350	0.734449	0.686703	20270000	20272000	AT5G49870	Chr5	20270191	20272548	1.25772	1.68917	yes	1500	interaction389488	5-20290000	+	992	5-20270000	+	1036	20113	15	0.069862	-28.92767	0	7	0.069862	700	-9.402607	1739	1745	-4.37086	800	800	10	-0.657928	0.000668375475861832	-4.1275	6.03217191231172e-10
26736000	26738000	AT1G70920	yes	Chr1	26735955	26738665	3.10578	1.99083	26710000	26712000	AT1G70830	Chr1	26709946	26711462	3.19402	4.36885	yes	1300	interaction90058	1-26736000	+	730	1-26710000	+	2603	26405	13	0.069862	-23.570031	1e-06	10	0.110662	631.311171	-16.028609	1950	4524	-4.33394	668.688829	668.689	8	-2.27898	9.03840818231783e-10	2.86715	4.82949705951616e-06
11214000	11216000	AT2G26340	NA	Chr2	11215251	11217033	0.762277	0.741957	11210000	11212000	AT2G26330	Chr2	11208182	11213971	0.750457	1.51557	yes	1200	interaction141782	2-11214000	+	366	2-11210000	+	1362	4593	12	0.069862	-21.060934	6e-06	5	0.069862	500	-5.624298	452	2081	-4.32786	700	700	6	2.86072	4.21935405097963e-74	6.50377	0
23848000	23850000	AT5G59080	NA	Chr5	23847404	23848557	0.766501	0.615691	23832000	23834000	AT5G59030	Chr5	23833727	23834511	1.06369	4.5235	yes	1200	interaction401050	5-23848000	+	858	5-23832000	+	351	15408	12	0.069862	-21.06757	6e-06	5	0.069862	500	-5.622952	1200	500	-4.32424	700	700	6	2.52157	1.27161978537156e-26	3.85757	1.29340007416279e-132
21748000	21750000	AT1G58602	NA	Chr1	21746353	21765705	0.793677	0.883	21732000	21734000	AT1G58520	Chr1	21729912	21738652	0.726449	0.651718	NA	1200	interaction73068	1-21748000	+	1906	1-21732000	+	336	15273	12	0.069862	-21.074806	6e-06	5	0.069862	500	-5.620912	2201	596	-4.31878	700	700	6	6.48534	3.72491263006463e-200	0.9433	0.00984720967903111
5934000	5936000	AT2G14100	yes	Chr2	5934555	5936371	0.819486	0.860895	5926000	5928000	AT2G14080	Chr2	5925185	5929600	0.966447	1.85291	yes	2300	interaction123057	2-5934000	+	977	2-5926000	+	805	8290	23	0.069862	-52.854666	0	13	0.069862	1300	-23.557873	1573	841	-4.31177	1000	1000	18	-5.36289	2.21524302186654e-31	4.35706	6.58755995903743e-183
24920000	24922000	AT5G62030	NA	Chr5	24918478	24920876	0.721227	0.702257	24912000	24914000	AT5G62000	Chr5	24910357	24915210	0.779303	0.763252	NA	1200	interaction404723	5-24920000	+	606	5-24912000	+	1008	7838	12	0.069862	-20.999776	6e-06	5	0.069862	500	-5.617105	930	1530	-4.30863	700	700	6	0.770847	1.6676991331339e-11	0.706843	1.44996545250223e-12
24996000	24998000	AT5G62230	NA	Chr5	24996128	25002340	0.650618	0.653096	24984000	24986000	AT5G62200	Chr5	24984235	24985711	0.828161	0.803639	NA	1200	interaction404932	5-24996000	+	672	5-24984000	+	1054	11649	12	0.069862	-20.990668	6e-06	5	0.069862	500	-5.617032	940	1691	-4.30844	700	700	6	6.04763	9.67841458169798e-40	-0.541641	0.0222357052880619
6388000	6390000	AT2G14860	NA	Chr2	6387623	6389628	0.745521	0.785789	6366000	6368000	AT2G14835	Chr2	6366887	6371034	0.798626	0.724384	NA	1200	interaction124880	2-6388000	+	605	2-6366000	+	711	21596	12	0.069862	-20.99993	6e-06	5	0.069862	500	-5.616791	975	1241	-4.30779	700	700	6	0.741599	0.000868454708208177	-0.344556	8.19937668263784e-05
12070000	12072000	AT1G33270	NA	Chr1	12068062	12070374	0.781637	0.664503	12052000	12054000	AT1G33240	Chr1	12051470	12054546	0.743059	0.750513	NA	1200	interaction41893	1-12070000	+	1087	1-12052000	+	926	17423	12	0.069862	-20.967787	7e-06	5	0.069862	500	-5.61587	1749	1137	-4.30534	700	700	6	0.607031	0.000824198135815379	1.81053	1.36455424278055e-23
24444000	24446000	AT1G65730	yes	Chr1	24442503	24446291	2.31589	2.71992	24400000	24402000	AT1G65620	Chr1	24398142	24400969	4.5951	5.51269	yes	1200	interaction82452	1-24444000	+	2652	1-24400000	+	772	44725	12	0.069862	-20.979852	7e-06	5	0.069862	500	-5.615273	3870	1274	-4.30376	700	700	6	-2.97413	9.28649100536923e-27	2.9509	3.05732143696332e-16
19098000	19100000	AT3G51470	NA	Chr3	19097786	19099275	0.666518	0.698198	19084000	19086000	AT3G51420	Chr3	19084034	19085858	1.67982	3.24661	yes	1200	interaction239917	3-19098000	+	1553	3-19084000	+	948	13225	12	0.069862	-20.966385	7e-06	5	0.069862	500	-5.615126	2500	1313	-4.30337	700	700	6	0.8766	7.10459757782366e-07	5.33377	3.96297448744078e-227
10662000	10664000	AT4G19560	NA	Chr4	10661427	10664716	0.675797	0.674614	10644000	10646000	AT4G19520	Chr4	10639268	10647079	1.45125	3.11146	yes	1200	interaction292900	4-10662000	+	1026	4-10644000	+	1164	17985	12	0.069862	-20.961901	7e-06	5	0.069862	500	-5.614887	1634	1382	-4.30274	700	700	6	1.45137	1.93900750115704e-06	3.09599	1.18530466429375e-17
12398000	12400000	AT4G23820	NA	Chr4	12397037	12400091	0.779557	0.979677	12380000	12382000	AT4G23760	Chr4	12381844	12383034	0.810461	0.784735	yes	1200	interaction298978	4-12398000	+	1076	4-12380000	+	1056	17690	12	0.069862	-20.960353	7e-06	5	0.069862	500	-5.614793	1616	1411	-4.30249	700	700	6	4.01275	1.03440822678515e-44	-0.293392	0.0156751033462411
8182000	8184000	AT1G23080	yes	Chr1	8180576	8183570	0.786898	0.912858	8150000	8152000	AT1G23020	Chr1	8150069	8153530	0.662795	0.77297	NA	1200	interaction28588	1-8182000	+	1207	1-8150000	+	1771	31889	12	0.069862	-20.953736	7e-06	5	0.069862	500	-5.614215	1621	2551	-4.30096	700	700	6	2.01809	6.48920664249694e-69	0.759629	7.73220675081031e-07
13842000	13844000	AT2G32620	yes	Chr2	13840743	13844324	2.21868	2.60634	13824000	13826000	AT2G32560	Chr2	13824793	13826986	0.836918	0.835485	yes	1200	interaction150939	2-13842000	+	992	2-13824000	+	1570	18288	12	0.069862	-20.963768	7e-06	5	0.069862	500	-5.614119	1662	2348	-4.3007	700	700	6	-6.08963	3.04853691333378e-17	1.0141	0.000133630966055066
21458000	21460000	AT1G58025	NA	Chr1	21457666	21462243	0.738466	0.72021	21416000	21418000	AT1G57820	Chr1	21414169	21417946	0.890914	1.0197	yes	1000	interaction71997	1-21458000	+	1153	1-21416000	+	2693	41913	10	0.069862	-16.041578	0.000763	5	0.083341	419.135011	-5.61408	1679	3957	-4.3006	580.864989	580.865	6	0.579282	0.00543311573925698	0.506588	0.0112752384479562
12268000	12270000	AT1G33811	yes	Chr1	12267865	12269913	2.37505	2.25246	12234000	12236000	AT1G33750	Chr1	12233768	12236476	4.06441	3.94207	yes	1200	interaction42675	1-12268000	+	1308	1-12234000	+	1061	34028	12	0.069862	-20.960104	7e-06	5	0.069862	500	-5.613687	1876	1959	-4.29956	700	700	6	8.12702	6.44326311291413e-42	-5.24696	1.27185664506085e-11
29194000	29196000	AT1G77680	yes	Chr1	29191833	29196287	0.780974	0.737512	29186000	29188000	AT1G77660	Chr1	29185898	29187825	0.762057	0.759046	NA	1900	interaction98283	1-29194000	+	1206	1-29186000	+	832	7752	19	0.069862	-40.474679	0	10	0.069862	1000	-16.033236	2019	1564	-4.26922	900	900	14	-0.480897	0.00504694621635381	-0.645079	0.000129321744416166
26918000	26920000	AT1G71420	NA	Chr1	26917821	26920099	0.662869	0.658892	26914000	26916000	AT1G71410	Chr1	26912725	26917712	0.770633	0.733276	NA	11368.854702	interaction90771	1-26918000	+	2071	1-26914000	+	1813	3989	126	0.077427	-492.080137	0	173	0.12965	9322.100499	-727.864512	3347	3088	-4.25277	2046.754203	2046.75	184	0.698191	0.0184410824506468	-0.340964	0.0466744063669529
17616000	17618000	AT3G47760	yes	Chr3	17611786	17616639	1.84784	2.68206	17602000	17604000	AT3G47740	Chr3	17600650	17604965	1.50279	2.07066	yes	2800	interaction234790	3-17616000	+	1802	3-17602000	+	1059	14129	28	0.069862	-69.189695	0	17	0.069862	1700	-34.52385	3018	1596	-4.22036	1100	1100	24	-5.23565	3.72936009656541e-08	-5.63629	6.10719748128447e-13
18508000	18510000	AT1G49980	NA	Chr1	18507970	18513172	0.714321	0.721904	18502000	18504000	AT1G49970	Chr1	18501569	18504609	0.869053	0.794181	NA	5000	interaction62032	1-18508000	+	1558	1-18502000	+	1651	6196	50	0.069862	-150.221546	0	41	0.079412	3606.940504	-115.327936	2470	2563	-4.18738	1393.059496	1393.06	56	0.364787	0.0229976188228496	2.62727	1.02330365089997e-136
6312000	6314000	AT5G18930	yes	Chr5	6311724	6313323	2.31952	1.86487	6308000	6310000	AT5G18910	Chr5	6306827	6309419	2.4296	2.87417	yes	8781.977192	interaction341862	5-6312000	+	1751	5-6308000	+	2093	4107	95	0.075574	-344.348293	0	152	0.152069	6983.011579	-619.57146	3272	3705	-4.18605	1798.965613	1798.97	128	0.863454	4.63732816670572e-05	-4.19181	6.03444005998745e-13
23656000	23658000	AT1G63770	NA	Chr1	23657505	23664677	0.817731	0.776639	23652000	23654000	AT1G63750	Chr1	23650847	23655363	0.989777	0.962033	yes	15084.961514	interaction79477	1-23656000	+	1868	1-23652000	+	2116	3835	176	0.08151	-746.925877	0	209	0.113876	12821.932559	-919.476159	3003	3023	-4.18524	2263.028955	2263.03	280	0.256064	0.0481110763202539	2.68573	2.21561601326895e-34
25464000	25466000	AT1G67900	NA	Chr1	25464725	25470017	0.783244	0.873348	25460000	25462000	AT1G67890	Chr1	25457178	25462792	0.807997	0.730936	NA	2400	interaction86153	1-25464000	+	687	1-25460000	+	357	4455	24	0.069862	-56.471394	0	14	0.069862	1400	-26.241756	966	663	-4.15444	1000	1000	20	2.33608	1.4491726928303e-25	0.521039	0.00208256711795187
23652000	23654000	AT1G63750	yes	Chr1	23650847	23655363	0.989777	0.962033	23628000	23630000	AT1G63700	Chr1	23624665	23629112	0.84574	0.707138	yes	1000	interaction79448	1-23652000	+	2116	1-23628000	+	1529	24423	10	0.069862	-16.033771	0.000763	6	0.095144	440.568176	-7.432437	3023	2509	-4.15388	559.431824	559.432	6	2.68573	2.21561601326895e-34	0.430874	0.000901994317630334
9044000	9046000	AT1G26160	NA	Chr1	9044440	9046979	0.813419	0.758916	9040000	9042000	AT1G26150	Chr1	9039627	9043288	0.627408	0.538566	NA	2400	interaction31583	1-9044000	+	716	1-9040000	+	625	4359	24	0.069862	-56.155117	0	14	0.069862	1400	-26.213222	1101	870	-4.13922	1000	1000	20	0.936291	1.83084516717991e-24	3.09914	4.22089006927258e-27
15570000	15572000	AT4G32250	NA	Chr4	15570043	15573323	0.716494	0.627471	15530000	15532000	AT4G32160	Chr4	15528804	15533100	0.789662	0.747848	NA	1400	interaction310212	4-15570000	+	2008	4-15530000	+	1685	40099	14	0.069862	-26.169227	0	12	0.116655	718.654784	-20.928206	3443	2701	-4.13282	681.345216	681.345	8	0.802236	5.25469649905743e-06	-0.354479	0.00264639100116278
3020000	3022000	AT3G09840	NA	Chr3	3019339	3023052	0.717047	0.701976	3004000	3006000	AT3G09790	Chr3	3003861	3006192	0.974499	1.78801	yes	2100	interaction181516	3-3020000	+	1920	3-3004000	+	1618	15816	21	0.069862	-46.451972	0	19	0.106986	1240.705754	-40.34854	3316	2572	-4.12901	859.294246	859.294	16	-0.325788	0.00149175439187386	-0.90488	0.00410966311781297
6788000	6790000	AT5G20090	NA	Chr5	6787001	6788654	0.778762	0.684525	6780000	6782000	AT5G20070	Chr5	6779853	6782482	0.740121	0.707745	NA	1600	interaction343536	5-6788000	+	369	5-6780000	+	993	8387	16	0.069862	-31.901778	0	8	0.069862	800	-11.521238	652	1616	-4.09618	800	800	10	-0.747845	4.80571543064809e-06	0.685646	0.00726402583592967
19002000	19004000	AT3G51150	NA	Chr3	19000855	19006769	0.633303	0.581911	18998000	19000000	AT3G51140	Chr3	18997599	18999904	0.676697	0.695978	NA	9500	interaction239530	3-19002000	+	1777	3-18998000	+	1100	3671	95	0.069862	-345.900135	0	75	0.069862	7500	-254.479155	2415	1712	-4.08426	2000	2000	128	2.13937	3.85562573110511e-06	2.15931	1.34785931213947e-74
19222000	19224000	AT1G51805	yes	Chr1	19220976	19225690	1.62494	2.48797	19208000	19210000	AT1G51790	Chr1	19206710	19211417	0.642398	0.791469	yes	1600	interaction64578	1-19222000	+	967	1-19208000	+	1571	13835	16	0.069862	-31.721143	0	8	0.069862	800	-11.506297	1191	2058	-4.07946	800	800	10	7.1917	1.37600524771529e-223	-1.88893	9.2340838968072e-06
26516000	26518000	AT5G66390	yes	Chr5	26515915	26517391	4.25293	5.08175	26480000	26482000	AT5G66300	Chr5	26479792	26481334	4.91865	5.90175	yes	900	interaction409450	5-26516000	+	1617	5-26480000	+	1596	36396	9	0.069862	-13.715369	0.007132	7	0.128491	380.596552	-9.398577	3194	3207	-4.07437	519.403448	519.403	4	-4.73155	5.72817489956848e-26	-0.908629	1.00064727319999e-05
29034000	29036000	AT1G77280	NA	Chr1	29031467	29035882	0.660616	0.727378	29020000	29022000	AT1G77250	Chr1	29020264	29023474	0.774611	0.685957	NA	2000	interaction97667	1-29034000	+	683	1-29020000	+	1905	13631	20	0.069862	-43.540627	0	11	0.069862	1100	-18.458593	1068	3024	-4.06487	900	900	16	-1.39161	2.17096171452812e-16	0.604265	0.0305952836192038
12512000	12514000	AT2G29120	yes	Chr2	12511291	12515895	2.6238	2.30407	12498000	12500000	AT2G29090	Chr2	12494850	12499723	1.91476	3.36225	yes	2000	interaction146189	2-12512000	+	1753	2-12498000	+	948	14578	20	0.069862	-43.469169	0	11	0.069862	1100	-18.454893	2367	1169	-4.06226	900	900	16	3.11009	8.84571001744571e-10	5.60489	3.66061741036352e-23
8866000	8868000	AT4G15530	NA	Chr4	8864827	8870967	0.773127	0.758507	8852000	8854000	AT4G15490	Chr4	8852697	8854545	1.86406	2.67128	yes	2000	interaction286841	4-8866000	+	1036	4-8852000	+	1678	13810	20	0.069862	-43.453582	0	11	0.069862	1100	-18.447059	1462	2241	-4.05674	900	900	16	2.46844	2.06049950208947e-24	6.76962	9.96642472256031e-49
12652000	12654000	AT4G24480	yes	Chr4	12649986	12654984	0.792312	0.699324	12640000	12642000	AT4G24450	Chr4	12635425	12642797	0.579102	0.622714	NA	2800	interaction299858	4-12652000	+	1136	4-12640000	+	2276	11785	28	0.069862	-69.166788	0	23	0.088971	1806.015945	-52.685319	1919	3696	-4.04781	993.984055	993.984	24	-1.64329	2.48363006174382e-12	2.42363	3.29259130209588e-26
4882000	4884000	AT3G14540	yes	Chr3	4881438	4883936	0.687818	0.742919	4858000	4860000	AT3G14470	Chr3	4857939	4861247	0.574444	0.680765	NA	1990.58556	interaction188211	3-4882000	+	2230	3-4858000	+	1908	23376	25	0.087741	-59.110012	0	27	0.151485	1245.190719	-65.620793	3684	3278	-4.0425	745.394841	745.395	22	-2.34606	5.62701935119448e-09	-1.45157	3.44124558141978e-12
3006000	3008000	AT1G09300	NA	Chr1	3003494	3008213	0.641443	0.661119	2994000	2996000	AT1G09270	Chr1	2994368	2998222	0.874513	0.787704	NA	3500	interaction10723	1-3006000	+	1787	1-2994000	+	1312	11939	35	0.069862	-93.539995	0	23	0.069862	2300	-52.676122	2532	2076	-4.00874	1200	1200	34	-0.577907	0.000103517726507338	-0.55336	2.78105827889054e-05
1194000	1196000	AT4G02710	NA	Chr4	1193515	1197630	0.615688	0.729121	1164000	1166000	AT4G02660	Chr4	1159666	1174321	0.729888	0.708662	yes	1251.824801	interaction259101	4-1194000	+	1556	4-1164000	+	2435	29804	14	0.078131	-26.17311	0	9	0.096218	653.473118	-13.710277	2233	3435	-4.00435	598.351683	598.352	8	-1.90022	8.09204782836348e-13	-1.45544	0.00144841635090342
10624000	10626000	AT3G28380	yes	Chr3	10623741	10628201	0.754285	0.907293	10596000	10598000	AT3G28345	Chr3	10593752	10598775	1.56495	1.57615	yes	900	interaction207567	3-10624000	+	2867	3-10596000	+	1147	28231	9	0.069862	-13.722366	0.007132	6	0.108644	385.822725	-7.433309	4182	2071	-4.00107	514.177275	514.177	4	-4.01959	2.33581871986706e-09	-4.4939	2.63490475567073e-141
17486000	17488000	AT1G47580	NA	Chr1	17485649	17486463	0.748891	0.761971	17482000	17484000	AT1G47570	Chr1	17478654	17483502	0.828937	0.815716	yes	5500	interaction58312	1-17486000	+	1633	1-17482000	+	843	3945	55	0.069862	-171.046714	0	40	0.069862	4000	-111.861925	2465	1324	-3.99407	1500	1500	64	2.89665	6.83263109347817e-71	-0.66885	3.88035586767445e-08
4884000	4886000	AT3G14550	NA	Chr3	4884565	4885982	0.377371	0.404572	4858000	4860000	AT3G14470	Chr3	4857939	4861247	0.574444	0.680765	NA	1800	interaction188227	3-4884000	+	1624	3-4858000	+	1908	26114	18	0.069862	-37.425884	0	15	0.101648	1030.942693	-28.872059	2472	3278	-3.97339	769.057307	769.057	14	-0.972949	8.65833565821359e-05	-1.45157	3.44124558141978e-12
7048000	7050000	AT4G11670	NA	Chr4	7044243	7053091	0.74522	0.715996	7016000	7018000	AT4G11610	Chr4	7013728	7018049	1.29949	1.58962	yes	1260.086806	interaction280839	4-7048000	+	1802	4-7016000	+	2238	32264	15	0.083163	-28.885883	0	13	0.133873	678.406622	-23.502445	2772	3850	-3.96182	581.680184	581.68	10	-0.462391	0.000578035696335415	-5.61028	1.96617018918136e-19
1636000	1638000	AT1G05530	yes	Chr1	1636495	1637863	0.770611	0.787894	1620000	1622000	AT1G05490	Chr1	1618601	1623452	0.53083	0.531056	NA	2100	interaction5465	1-1636000	+	1788	1-1620000	+	1666	16163	21	0.069862	-46.448549	0	18	0.099543	1263.289816	-37.390216	2825	2809	-3.95587	836.710184	836.71	16	-4.88072	1.21111799073048e-30	0.702647	0.0496119892926467
568000	570000	AT1G02650	yes	Chr1	568703	570418	0.75408	1.24206	560000	562000	AT1G02630	Chr1	560609	562424	0.8191	0.909611	yes	1300	interaction1823	1-568000	+	902	1-560000	+	430	8324	13	0.069862	-23.634657	1e-06	6	0.069862	600	-7.444405	1388	644	-3.93386	700	700	8	4.04193	1.57370721369325e-20	2.79735	2.71793478782821e-05
23658000	23660000	AT1G63770	NA	Chr1	23657505	23664677	0.817731	0.776639	23632000	23634000	AT1G63710	Chr1	23632177	23633942	2.22894	1.75318	yes	1100	interaction79482	1-23658000	+	2303	1-23632000	+	1178	25678	11	0.069862	-18.454594	7.4e-05	7	0.09304	525.61599	-9.401235	3604	2058	-3.93373	574.38401	574.384	6	0.256064	0.0481110763202539	3.85298	2.35225552035618e-06
12942000	12944000	AT4G25290	NA	Chr4	12941241	12944994	0.723522	0.665556	12932000	12934000	AT4G25240	Chr4	12930401	12933892	0.737082	0.660525	NA	1300	interaction300985	4-12942000	+	490	4-12932000	+	1553	9510	13	0.069862	-23.615338	1e-06	6	0.069862	600	-7.441852	765	2375	-3.92964	700	700	8	3.59277	1.12566730479729e-25	-1.54298	5.83212404763853e-12
19372000	19374000	AT1G52080	yes	Chr1	19369130	19372065	0.840843	0.886371	19364000	19366000	AT1G52070	Chr1	19364887	19366924	3.33117	4.31488	yes	1300	interaction65265	1-19372000	+	1187	1-19364000	+	505	7415	13	0.069862	-23.611233	1e-06	6	0.069862	600	-7.441373	1699	793	-3.92885	700	700	8	-1.00311	4.85257242766592e-17	-5.26387	1.55271875687272e-08
11514000	11516000	AT2G26980	NA	Chr2	11514702	11518734	0.862948	0.82394	11508000	11510000	AT2G26970	Chr2	11509720	11511914	0.821661	0.847349	yes	1300	interaction142741	2-11514000	+	716	2-11508000	+	473	5290	13	0.069862	-23.620309	1e-06	6	0.069862	600	-7.440283	1067	865	-3.92705	700	700	8	1.21271	0.000107700310386799	0.361682	0.00179867652083209
1440000	1442000	AT1G05030	NA	Chr1	1438151	1441417	0.781845	0.671465	1432000	1434000	AT1G05010	Chr1	1431189	1432858	0.74109	0.953852	NA	1300	interaction4856	1-1440000	+	1042	1-1432000	+	640	8479	13	0.069862	-23.583009	1e-06	6	0.069862	600	-7.439433	1549	931	-3.92565	700	700	8	1.24399	1.84378792935245e-22	2.45347	2.87914354149867e-22
6088000	6090000	AT5G18370	NA	Chr5	6085035	6088926	0.621422	0.620725	6080000	6082000	AT5G18360	Chr5	6080048	6083027	0.690442	0.586936	NA	7200	interaction341035	5-6088000	+	1704	5-6080000	+	1800	8094	72	0.069862	-241.444637	0	88	0.11005	5586.439191	-311.438177	2941	2983	-3.9249	1613.560809	1613.56	90	-1.51303	4.00344034697295e-23	-1.15391	6.20833154414671e-09
8870000	8872000	AT4G15530	NA	Chr4	8864827	8870967	0.773127	0.758507	8852000	8854000	AT4G15490	Chr4	8852697	8854545	1.86406	2.67128	yes	1300	interaction286861	4-8870000	+	681	4-8852000	+	1678	17468	13	0.069862	-23.576669	1e-06	6	0.069862	600	-7.438833	984	2241	-3.92466	700	700	8	2.46844	2.06049950208947e-24	6.76962	9.96642472256031e-49
5272000	5274000	AT5G16150	NA	Chr5	5272556	5275815	0.795227	0.761342	5260000	5262000	AT5G16110	Chr5	5260603	5262840	0.849226	0.933579	NA	1300	interaction338137	5-5272000	+	929	5-5260000	+	743	11785	13	0.069862	-23.568418	1e-06	6	0.069862	600	-7.43631	1556	1294	-3.92051	700	700	8	1.90836	3.34059837493866e-140	-0.984642	0.00612975390925045
7594000	7596000	AT5G22780	NA	Chr5	7589853	7598049	0.711456	0.626991	7584000	7586000	AT5G22770	Chr5	7579262	7588249	0.737824	0.625244	NA	1300	interaction346317	5-7594000	+	945	5-7584000	+	850	10039	13	0.069862	-23.557027	1e-06	6	0.069862	600	-7.435385	1543	1463	-3.91899	700	700	8	-0.220304	0.0392847883573017	-0.307172	0.000562850769522665
4114000	4116000	AT5G13000	NA	Chr5	4110294	4121427	0.806456	0.697912	4094000	4096000	AT5G12950	Chr5	4092952	4096975	0.523558	0.419519	NA	1300	interaction334131	5-4114000	+	1274	5-4094000	+	1075	20590	13	0.069862	-23.540505	1e-06	6	0.069862	600	-7.434707	1976	1618	-3.91788	700	700	8	0.52573	0.0384692802884094	1.7473	9.25641672912741e-42
25000000	25002000	AT1G66980	yes	Chr1	24997308	25001983	0.80125	1.88024	24978000	24980000	AT1G66950	Chr1	24978204	24984619	1.66084	2.15792	yes	1300	interaction84439	1-25000000	+	1444	1-24978000	+	1170	22441	13	0.069862	-23.535445	1e-06	6	0.069862	600	-7.434553	1658	1831	-3.91763	700	700	8	7.38135	0	-5.02397	7.42142954142439e-14
18134000	18136000	AT5G44900	NA	Chr5	18135445	18136438	0.616366	0.836017	18116000	18118000	AT5G44870	Chr5	18114665	18118608	1.0797	2.24754	yes	3600	interaction382054	5-18134000	+	1120	5-18116000	+	1521	17805	36	0.069862	-97.230012	0	24	0.069862	2400	-55.873985	1958	2105	-3.91658	1200	1200	36	-5.182	9.05455577370574e-28	2.20358	3.54236705501637e-34
20914000	20916000	AT5G51490	yes	Chr5	20913552	20915606	2.76235	3.43066	20902000	20904000	AT5G51460	Chr5	20900976	20904539	0.845333	0.810146	yes	5151.080267	interaction391427	5-20914000	+	2589	5-20902000	+	1448	11852	57	0.077307	-178.45694	0	69	0.124707	3865.45954	-228.224519	4525	2197	-3.90945	1285.620727	1285.62	66	-6.66429	1.76985233239162e-23	1.05811	3.60813573207475e-06
17744000	17746000	AT4G37760	NA	Chr4	17743886	17746678	0.749021	0.886578	17740000	17742000	AT4G37750	Chr4	17739513	17742401	1.80045	3.01297	yes	4900	interaction317252	4-17744000	+	1400	4-17740000	+	1043	3721	49	0.069862	-146.645377	0	35	0.069862	3500	-93.425097	2306	1783	-3.90533	1400	1400	54	2.99995	4.33931710625505e-40	1.36047	3.53936575454488e-10
9546000	9548000	AT4G16960	NA	Chr4	9546342	9551007	0.400495	0.414563	9542000	9544000	AT4G16950	Chr4	9538797	9544467	0.398034	0.329196	NA	5000	interaction289315	4-9546000	+	1089	4-9542000	+	797	3857	50	0.069862	-150.966916	0	36	0.069862	3600	-97.373296	1537	887	-3.89874	1400	1400	56	-1.53638	0.000183322470094043	2.61975	7.22284784353196e-50
29738000	29740000	AT1G79050	NA	Chr1	29736958	29740179	0.782503	0.66424	29732000	29734000	AT1G79030	Chr1	29730766	29733611	0.714374	0.680507	NA	2100	interaction99915	1-29738000	+	679	1-29732000	+	846	5727	21	0.069862	-46.617343	0	12	0.069862	1200	-20.961901	1026	1489	-3.88146	900	900	16	1.18083	6.64948018173985e-26	-0.844067	3.18466809882705e-14
572000	574000	AT1G02660	NA	Chr1	571954	574981	0.731296	0.803909	568000	570000	AT1G02650	Chr1	568703	570418	0.75408	1.24206	yes	3100	interaction1836	1-572000	+	716	1-568000	+	902	3636	31	0.069862	-79.678095	0	20	0.069862	2000	-43.469752	945	1388	-3.88093	1100	1100	28	4.22113	1.31564661121782e-67	4.04193	1.57370721369325e-20
12728000	12730000	AT4G24670	yes	Chr4	12727833	12731274	0.843144	1.47999	12724000	12726000	AT4G24660	Chr4	12724742	12725637	1.49936	5.93431	yes	6500	interaction300236	4-12728000	+	1095	4-12724000	+	1216	3962	65	0.069862	-212.20727	0	49	0.069862	4900	-146.328082	1534	1459	-3.8767	1600	1600	78	1.53356	8.07522450297386e-16	4.22583	9.38124723983767e-61
11154000	11156000	AT2G26200	NA	Chr2	11152725	11156466	0.77736	0.731597	11146000	11148000	AT2G26190	Chr2	11147638	11150510	0.667842	0.719343	NA	1000	interaction141609	2-11154000	+	843	2-11146000	+	234	8657	10	0.069862	-16.168015	0.000713	4	0.069862	400	-3.970836	1351	470	-3.87006	600	600	6	0.44214	1.8350859370646e-05	0.766566	0.00144838917280388
9286000	9288000	AT5G26742	NA	Chr5	9284978	9289003	0.832425	0.690506	9266000	9268000	AT5G26570	Chr5	9261579	9267729	0.79225	0.60661	NA	2100	interaction352026	5-9286000	+	991	5-9266000	+	1392	19872	21	0.069862	-46.527363	0	12	0.069862	1200	-20.942277	1605	1938	-3.87001	900	900	16	2.68599	3.09382363620792e-107	1.72342	3.30117806669103e-59
29466000	29468000	AT1G78320	yes	Chr1	29467436	29468374	1.48732	1.11849	29458000	29460000	AT1G78290	Chr1	29457204	29459400	0.811768	0.796722	NA	1000	interaction98939	1-29466000	+	501	1-29458000	+	344	8523	10	0.069862	-16.116889	0.000745	4	0.069862	400	-3.969495	919	583	-3.86537	600	600	6	-2.40606	2.19730919468348e-11	-3.34908	9.20557389807199e-25
144000	146000	AT3G01380	NA	Chr3	144287	149828	0.776906	0.700671	142000	144000	AT3G01370	Chr3	139010	143706	0.691942	0.611776	NA	5100	interaction171498	3-144000	+	513	3-142000	+	1024	1256	51	0.069862	-155.864759	0	37	0.069862	3700	-101.179524	733	1374	-3.86435	1400	1400	58	-0.312236	0.00517534281199406	2.78164	7.37391995572447e-44
6250000	6252000	AT3G18230	NA	Chr3	6251482	6254221	0.672688	0.693186	6232000	6234000	AT3G18190	Chr3	6232125	6234060	0.756757	0.714897	NA	1500	interaction192960	3-6250000	+	1037	3-6232000	+	2443	17666	15	0.069862	-28.923627	0	10	0.085242	819.574075	-16.030632	1760	3861	-3.86375	680.425925	680.426	10	-0.687127	8.05127322806275e-08	-0.524571	3.25900926035305e-06
620000	622000	AT4G01460	yes	Chr4	620758	622945	2.58878	4.46943	598000	600000	AT4G01440	Chr4	596398	598718	3.33724	2.25035	yes	1000	interaction257224	4-620000	+	450	4-598000	+	723	22193	10	0.069862	-16.091474	0.000758	4	0.069862	400	-3.968891	654	1465	-3.86326	600	600	6	5.94658	1.49379343563303e-76	-2.39501	1.07410619176218e-50
18860000	18862000	AT5G46510	NA	Chr5	18860450	18867013	0.427247	0.432812	18848000	18850000	AT5G46470	Chr5	18842700	18849741	0.82341	0.673445	NA	1000	interaction384634	5-18860000	+	472	5-18848000	+	1231	11727	10	0.069862	-16.087641	0.000759	4	0.069862	400	-3.968273	747	1484	-3.8611	600	600	6	0.703522	0.0235165605123907	0.726949	0.00168750164222977
21016000	21018000	AT1G56150	yes	Chr1	21017384	21017939	1.85162	2.77128	21004000	21006000	AT1G56140	Chr1	21001573	21007809	0.715964	0.725695	NA	1000	interaction70663	1-21016000	+	423	1-21004000	+	1055	11664	10	0.069862	-16.096727	0.000756	4	0.069862	400	-3.967707	859	1783	-3.85913	600	600	6	6.23509	8.64783769830871e-22	-1.6764	5.69278319660604e-38
4418000	4420000	AT5G13690	NA	Chr5	4415753	4420371	0.743209	0.59892	4402000	4404000	AT5G13650	Chr5	4397745	4402692	0.746442	0.606329	NA	1000	interaction335198	5-4418000	+	655	5-4402000	+	1020	16184	10	0.069862	-16.065796	0.000763	4	0.069862	400	-3.967527	902	1711	-3.85851	600	600	6	1.15999	1.26979391440218e-16	2.21386	1.34727144043564e-58
9510000	9512000	AT4G16900	NA	Chr4	9511858	9516541	0.627999	0.562104	9490000	9492000	AT4G16860	Chr4	9488465	9495816	0.753631	0.663132	NA	1000	interaction289118	4-9510000	+	2647	4-9490000	+	884	19950	10	0.069862	-16.051256	0.000763	4	0.069862	400	-3.967181	3010	998	-3.8573	600	600	6	1.16585	7.73801154939317e-22	3.98441	5.62444500461666e-89
5608000	5610000	AT5G17050	NA	Chr5	5607787	5609492	0.686249	0.70197	5574000	5576000	AT5G16960	Chr5	5574280	5575910	0.712476	1.00983	yes	900	interaction339312	5-5608000	+	1414	5-5574000	+	1968	33487	9	0.069862	-13.717668	0.007132	6	0.105889	395.858311	-7.431948	2847	2965	-3.85718	504.141689	504.142	4	0.691399	0.000785803033166186	3.41598	0.000890726503578222
15398000	15400000	AT5G38460	yes	Chr5	15397739	15401095	0.821267	0.773024	15378000	15380000	AT5G38410	Chr5	15377172	15378416	0.61952	1.48226	yes	1000	interaction373380	5-15398000	+	1218	5-15378000	+	1027	19778	10	0.069862	-16.045478	0.000763	4	0.069862	400	-3.967105	1871	1022	-3.85704	600	600	6	-0.401609	0.000130685779683701	7.83776	1.68463897626054e-161
17496000	17498000	AT1G47603	yes	Chr1	17496838	17498110	2.88918	3.40956	17482000	17484000	AT1G47570	Chr1	17478654	17483502	0.828937	0.815716	yes	1000	interaction58340	1-17496000	+	776	1-17482000	+	843	14001	10	0.069862	-16.057039	0.000763	4	0.069862	400	-3.966552	1238	1324	-3.85512	600	600	6	-3.92928	4.46669837208827e-07	-0.66885	3.88035586767445e-08
17104000	17106000	AT3G46480	yes	Chr3	17103172	17105594	0.90788	0.904558	17054000	17056000	AT3G46370	Chr3	17051954	17055514	2.93096	3.06132	yes	1000	interaction233028	3-17104000	+	855	3-17054000	+	2423	49825	10	0.069862	-16.052665	0.000763	4	0.069862	400	-3.966543	1242	2945	-3.85509	600	600	6	-3.34622	7.21143992850943e-14	5.91371	1.91642207923984e-21
16136000	16138000	AT4G33565	NA	Chr4	16136748	16138201	0.737118	0.823118	16120000	16122000	AT4G33520	Chr4	16118895	16126151	0.690473	0.650343	NA	1000	interaction312223	4-16136000	+	827	4-16120000	+	1012	16441	10	0.069862	-16.054119	0.000763	4	0.069862	400	-3.966169	1450	1656	-3.85379	600	600	6	-1.04037	1.56894075583845e-11	1.52646	6.96908326177227e-25
9644000	9646000	AT3G26320	yes	Chr3	9644382	9646064	1.57008	2.15602	9598000	9600000	AT3G26230	Chr3	9598004	9599959	0.675153	0.770436	NA	1000	interaction204784	3-9644000	+	1223	3-9598000	+	1751	45596	10	0.069862	-16.03976	0.000763	4	0.069862	400	-3.965835	1706	2557	-3.85263	600	600	6	4.75037	5.05167351236986e-24	1.46631	0.0424420437897004
8316000	8318000	AT2G19170	yes	Chr2	8314004	8318596	0.653089	0.643348	8284000	8286000	AT2G19110	Chr2	8278880	8286445	1.07566	0.768982	yes	900	interaction131809	2-8316000	+	1650	2-8284000	+	1533	31823	9	0.069862	-13.716103	0.007132	4	0.076658	364.536422	-3.965283	2405	2541	-3.85072	535.463578	535.464	4	0.589019	0.0207465782285797	-2.12686	3.3229148573494e-66
17314000	17316000	AT3G47000	NA	Chr3	17313645	17316566	0.695972	0.699637	17302000	17304000	AT3G46970	Chr3	17301393	17306446	0.744836	0.611372	NA	2600	interaction233856	3-17314000	+	1242	3-17302000	+	1804	11729	26	0.069862	-62.467732	0	16	0.069862	1600	-31.664721	1985	2741	-3.82342	1000	1000	22	0.423868	2.08464955472606e-07	2.87743	7.33551196859014e-43
2074000	2076000	AT3G06640	NA	Chr3	2074188	2078317	0.53491	0.516312	2066000	2068000	AT3G06620	Chr3	2062205	2067416	0.838036	0.677329	NA	4211.363885	interaction178038	3-2074000	+	2770	3-2066000	+	1394	8260	48	0.079627	-142.438462	0	72	0.162844	3088.887642	-240.842736	4547	2855	-3.82146	1122.476243	1122.48	52	2.2149	2.99425924385214e-09	-0.383701	0.00341491988438439
20478000	20480000	AT3G55250	NA	Chr3	20479288	20480634	0.694126	0.934903	20434000	20436000	AT3G55130	Chr3	20433877	20436390	3.19462	4.2781	yes	900	interaction244788	3-20478000	+	1150	3-20434000	+	2599	44384	9	0.069862	-13.722301	0.007132	5	0.087487	399.271048	-5.614151	1648	4232	-3.81196	500.728952	500.729	4	3.65713	4.02656535860442e-163	5.86438	7.5614483398405e-129
16898000	16900000	AT1G44760	yes	Chr1	16896685	16898612	0.883139	1.12321	16894000	16896000	AT1G44750	Chr1	16892638	16895465	0.801747	0.793843	yes	6000	interaction56457	1-16898000	+	865	1-16894000	+	975	3940	60	0.069862	-191.638804	0	45	0.069862	4500	-130.905142	1194	1587	-3.74998	1500	1500	70	1.98463	2.93425340226951e-32	-0.456218	0.00947658890033456
18002000	18004000	AT2G43330	NA	Chr2	18000853	18004083	0.821206	0.696526	17982000	17984000	AT2G43260	Chr2	17983690	17985104	0.781881	0.690369	NA	1100	interaction165661	2-18002000	+	1387	2-17982000	+	1429	20166	11	0.069862	-18.448748	7.4e-05	6	0.077399	541.575344	-7.432804	2304	2678	-3.74471	558.424656	558.425	6	1.5441	1.07948742077895e-26	0.285648	0.03472272243726
18364000	18366000	AT2G44490	NA	Chr2	18364755	18367725	0.838154	0.821756	18360000	18362000	AT2G44480	Chr2	18359733	18363088	1.3912	1.40437	yes	2200	interaction166916	2-18364000	+	619	2-18360000	+	366	4054	22	0.069862	-50.014481	0	13	0.069862	1300	-23.575096	1162	692	-3.73583	900	900	18	0.9889	7.0566891818856e-10	-3.27186	5.06428347264579e-35
5926000	5928000	AT2G14080	yes	Chr2	5925185	5929600	0.966447	1.85291	5912000	5914000	AT2G14050	Chr2	5909177	5913817	0.708904	0.593274	NA	2200	interaction123021	2-5926000	+	805	2-5912000	+	2167	13778	22	0.069862	-49.690821	0	13	0.069862	1300	-23.557873	841	2870	-3.72728	900	900	18	4.35706	6.58755995903743e-183	0.548551	0.000711712692207387
10296000	10298000	AT4G18710	yes	Chr4	10296272	10301228	1.38882	1.25682	10290000	10292000	AT4G18700	Chr4	10288797	10290850	0.767402	0.798638	NA	2200	interaction291717	4-10296000	+	1242	4-10290000	+	617	5991	22	0.069862	-49.772305	0	13	0.069862	1300	-23.550622	1822	925	-3.72369	900	900	18	0.565817	0.0125205137402594	0.478711	0.048164087467214
7576000	7578000	AT1G21610	NA	Chr1	7573921	7578956	0.762885	0.679581	7568000	7570000	AT1G21590	Chr1	7566231	7569902	0.790393	0.707191	NA	2200	interaction26579	1-7576000	+	812	1-7568000	+	1026	7666	22	0.069862	-49.688522	0	13	0.069862	1300	-23.529803	1298	1771	-3.71344	900	900	18	0.438538	0.0139386106415371	1.08199	9.44998224419705e-07
18066000	18068000	AT5G44770	yes	Chr5	18065054	18066680	1.84488	3.00707	18034000	18036000	AT5G44700	Chr5	18032863	18036894	0.61373	0.681932	NA	1100	interaction381898	5-18066000	+	1711	5-18034000	+	1754	31936	11	0.069862	-18.442516	7.4e-05	8	0.102699	544.20973	-11.495877	2827	2896	-3.71277	555.79027	555.79	6	-5.20374	2.01431994183917e-11	-3.35799	5.24092082899956e-26
14852000	14854000	AT5G37450	NA	Chr5	14852800	14857098	0.481762	0.587464	14834000	14836000	AT5G37400	Chr5	14834342	14836346	0.778439	0.674292	NA	1900	interaction371703	5-14852000	+	3104	5-14834000	+	1043	17790	19	0.069862	-40.43681	0	13	0.080692	1125.51987	-23.519462	3961	1624	-3.70837	774.48013	774.48	14	-1.38103	0.0014058362812364	1.15701	4.42074916190222e-05
16240000	16242000	AT4G33880	yes	Chr4	16239362	16241137	3.65254	4.55246	16214000	16216000	AT4G33810	Chr4	16213323	16215594	2.87461	2.56519	yes	2200	interaction312676	4-16240000	+	1472	4-16214000	+	2036	26263	22	0.069862	-49.570551	0	22	0.111137	1382.948048	-49.503927	2737	3237	-3.66552	817.051952	817.052	18	-6.09939	2.75733247639472e-47	-0.424439	0.0077331930417296
9510000	9512000	AT4G16900	NA	Chr4	9511858	9516541	0.627999	0.562104	9502000	9504000	AT4G16890	Chr4	9500505	9505455	0.596102	0.578236	NA	5400	interaction289123	4-9510000	+	2647	4-9502000	+	1125	8012	54	0.069862	-166.547722	0	40	0.069862	4000	-111.890994	3010	1260	-3.6485	1400	1400	62	1.16585	7.73801154939317e-22	2.55938	2.02741479868906e-44
27284000	27286000	AT1G72470	NA	Chr1	27283692	27285895	0.709851	0.765211	27276000	27278000	AT1G72450	Chr1	27274064	27276317	0.868566	1.04913	NA	1800	interaction91845	1-27284000	+	1373	1-27276000	+	554	7777	18	0.069862	-37.590744	0	10	0.069862	1000	-16.061154	2097	714	-3.64465	800	800	14	-1.29797	2.48635940695052e-16	1.02526	0.0031379922353848
21172000	21174000	AT1G56510	yes	Chr1	21167588	21173632	1.01342	1.77375	21162000	21164000	AT1G56500	Chr1	21159743	21167321	0.857098	0.765229	NA	1400	interaction71145	1-21172000	+	1254	1-21162000	+	657	9866	14	0.069862	-26.242854	0	7	0.069862	700	-9.413981	1113	762	-3.63459	700	700	8	7.00144	6.28193826751109e-75	4.0111	3.33265162847515e-131
20428000	20430000	AT5G50175	yes	Chr5	20428094	20428719	2.75097	1.73401	20414000	20416000	AT5G50160	Chr5	20415770	20418742	1.43971	1.22349	yes	1400	interaction390028	5-20428000	+	991	5-20414000	+	560	13280	14	0.069862	-26.263888	0	7	0.069862	700	-9.413412	1586	784	-3.63395	700	700	8	-4.4619	2.02793339122514e-15	6.59886	2.34793729988131e-65
9500000	9502000	AT4G16890	NA	Chr4	9500505	9505455	0.596102	0.578236	9496000	9498000	AT4G16880	Chr4	9496184	9497313	0.636018	0.918189	NA	3400	interaction289071	4-9500000	+	1195	4-9496000	+	580	4096	34	0.069862	-90.48215	0	23	0.069862	2300	-52.947518	1288	612	-3.6317	1100	1100	32	2.55938	2.02741479868906e-44	7.48101	6.81002425650426e-49
10642000	10644000	AT4G19520	yes	Chr4	10639268	10647079	1.45125	3.11146	10626000	10628000	AT4G19500	Chr4	10625658	10631570	0.814103	0.714032	NA	1800	interaction292822	4-10642000	+	1586	4-10626000	+	887	16131	18	0.069862	-37.49649	0	10	0.069862	1000	-16.038052	1689	1297	-3.62911	800	800	14	3.09599	1.18530466429375e-17	1.48346	1.57893516643006e-31
15570000	15572000	AT4G32250	NA	Chr4	15570043	15573323	0.716494	0.627471	15546000	15548000	AT4G32190	Chr4	15544877	15547855	0.780763	0.672849	NA	1400	interaction310218	4-15570000	+	2008	4-15546000	+	592	23924	14	0.069862	-26.25618	0	7	0.069862	700	-9.408621	3443	1036	-3.62855	700	700	8	0.802236	5.25469649905743e-06	2.3865	8.41550932536161e-36
4972000	4974000	AT3G14810	yes	Chr3	4970989	4974534	0.836386	1.0475	4958000	4960000	AT3G14770	Chr3	4957333	4959704	0.800893	0.835433	yes	1800	interaction188674	3-4972000	+	1472	3-4958000	+	883	14440	18	0.069862	-37.497197	0	10	0.069862	1000	-16.036904	2153	1352	-3.62834	800	800	14	1.69819	3.02762312348935e-08	1.22099	0.0115948914478219
29742000	29744000	AT1G79060	NA	Chr1	29741747	29743600	0.680511	0.916989	29732000	29734000	AT1G79030	Chr1	29730766	29733611	0.714374	0.680507	NA	1800	interaction99929	1-29742000	+	1025	1-29732000	+	846	9636	18	0.069862	-37.504058	0	10	0.069862	1000	-16.034414	1684	1489	-3.62667	800	800	14	0.379746	0.0102955519699477	-0.844067	3.18466809882705e-14
27466000	27468000	AT1G73010	yes	Chr1	27464571	27466256	3.53737	2.77688	27454000	27456000	AT1G72970	Chr1	27452765	27455964	0.770462	0.71621	NA	1400	interaction92506	1-27466000	+	686	1-27454000	+	1682	12238	14	0.069862	-26.237729	0	7	0.069862	700	-9.40647	1211	2509	-3.62613	700	700	8	-0.789413	0.0322451657701356	2.76905	5.36045533765984e-27
10850000	10852000	AT4G20050	yes	Chr4	10849781	10853346	1.40099	1.29155	10830000	10832000	AT4G19985	Chr4	10830236	10832094	0.851765	0.796362	yes	1400	interaction293622	4-10850000	+	1029	4-10830000	+	1188	19999	14	0.069862	-26.19914	0	7	0.069862	700	-9.401387	2017	2077	-3.62043	700	700	8	-0.93369	0.0201718439446555	3.23768	1.15541452802095e-38
11256000	11258000	AT1G31440	NA	Chr1	11255835	11258715	0.808898	0.760302	11250000	11252000	AT1G31420	Chr1	11249599	11253915	0.842567	0.776906	NA	8100	interaction39351	1-11256000	+	1250	1-11250000	+	995	5664	81	0.069862	-282.323185	0	64	0.069862	6400	-207.414614	1940	1570	-3.61335	1700	1700	104	0.506738	2.0269013462074e-07	1.0621	1.84717905328579e-17
15924000	15926000	AT4G33000	NA	Chr4	15924348	15926628	0.707703	0.673437	15916000	15918000	AT4G32980	Chr4	15914721	15918044	0.784996	2.03499	NA	2800	interaction311405	4-15924000	+	1170	4-15916000	+	824	8064	28	0.069862	-69.286398	0	18	0.069862	1800	-37.469225	1609	1075	-3.6068	1000	1000	24	4.05383	6.52191800702759e-101	6.9929	1.24621049970409e-113
6238000	6240000	AT5G18700	NA	Chr5	6235095	6240733	0.574996	0.544963	6226000	6228000	AT5G18670	Chr5	6225955	6228132	0.731432	0.671043	NA	4000	interaction341559	5-6238000	+	2503	5-6226000	+	1283	11862	40	0.069862	-111.88021	0	49	0.118587	2886.693893	-146.041123	4121	2294	-3.59985	1113.306107	1113.31	40	0.988833	0.000141041846594824	1.49738	2.94273732123254e-33
1792000	1794000	AT5G05965	yes	Chr5	1790787	1792634	2.61186	2.26397	1782000	1784000	AT5G05930	Chr5	1779973	1783412	0.811923	0.731532	NA	2800	interaction326235	5-1792000	+	993	5-1782000	+	1194	9726	28	0.069862	-69.212185	0	18	0.069862	1800	-37.425109	1639	2022	-3.59302	1000	1000	24	2.26214	5.10642655616991e-10	1.08692	1.99985834648421e-15
524000	526000	AT4G01250	NA	Chr4	522603	524216	0.596261	0.590602	518000	520000	AT4G01240	Chr4	517794	521972	0.655659	0.688995	NA	2900	interaction256911	4-524000	+	458	4-518000	+	1890	5769	29	0.069862	-73.068433	0	19	0.069862	1900	-40.528046	648	2773	-3.53213	1000	1000	26	3.15552	8.54316880986116e-33	-5.52331	1.15712649317767e-30
17054000	17056000	AT3G46370	yes	Chr3	17051954	17055514	2.93096	3.06132	17024000	17026000	AT3G46330	Chr3	17020746	17025011	1.86259	2.64542	yes	2180.762688	interaction232709	3-17054000	+	2423	3-17024000	+	1667	29781	26	0.083293	-62.405251	0	20	0.096272	1451.346021	-43.35291	2945	2606	-3.50503	729.416667	729.417	22	5.91371	1.91642207923984e-21	-6.21046	3.45338698747857e-31
13836000	13838000	AT4G27730	NA	Chr4	13833806	13836578	0.638068	0.641234	13828000	13830000	AT4G27710	Chr4	13828431	13830596	0.753139	0.719102	NA	3500	interaction304375	4-13836000	+	1036	4-13828000	+	1392	7551	35	0.069862	-93.656455	0	24	0.069862	2400	-55.929998	1371	1933	-3.50067	1100	1100	34	0.771815	1.26407834201209e-05	1.16722	2.67856372856845e-17
25000000	25002000	AT1G66980	yes	Chr1	24997308	25001983	0.80125	1.88024	24992000	24994000	AT1G66970	Chr1	24992552	24996117	0.818376	1.54751	yes	5700	interaction84446	1-25000000	+	1444	1-24992000	+	2346	8099	57	0.069862	-178.459969	0	43	0.069862	4300	-123.034398	1658	2608	-3.48958	1400	1400	66	7.38135	0	6.69999	7.76316060686033e-215
12550000	12552000	AT2G29200	NA	Chr2	12548930	12553433	0.550589	0.553432	12508000	12510000	AT2G29110	Chr2	12506879	12510552	2.10031	2.2937	yes	709.188296	interaction146355	2-12550000	+	1815	2-12508000	+	2632	42048	10	0.09851	-16.030003	0.000763	7	0.140118	349.01492	-9.399121	2870	3892	-3.48657	360.173376	360.173	6	-0.965202	1.09116156298038e-06	-2.08381	0.0123179555707828
10024000	10026000	AT3G27170	NA	Chr3	10024016	10027198	0.629077	0.59363	10016000	10018000	AT3G27160	Chr3	10017475	10019090	0.86467	0.807883	yes	2400	interaction205883	3-10024000	+	2235	3-10016000	+	254	7462	24	0.069862	-56.776814	0	15	0.069862	1500	-29.006367	3457	539	-3.4815	900	900	20	-0.628244	0.00026299694974631	4.74175	0
7050000	7052000	AT4G11670	NA	Chr4	7044243	7053091	0.74522	0.715996	7014000	7016000	AT4G11610	Chr4	7013728	7018049	1.29949	1.58962	yes	1232.224477	interaction280852	4-7050000	+	1837	4-7014000	+	2245	36252	15	0.085044	-28.884911	0	13	0.128374	707.466773	-23.501423	2895	3535	-3.47947	524.757704	524.758	10	-0.462391	0.000578035696335415	-5.61028	1.96617018918136e-19
5844000	5846000	AT3G17130	yes	Chr3	5844494	5845046	1.28545	2.56298	5832000	5834000	AT3G17100	Chr3	5831193	5832419	0.731879	0.731803	NA	1100	interaction191376	3-5844000	+	1135	3-5832000	+	336	11761	11	0.069862	-18.552734	7.1e-05	5	0.069862	500	-5.62519	1783	425	-3.47461	600	600	6	2.61235	3.49818373550096e-07	1.39685	1.58711796756054e-13
6876000	6878000	AT2G15790	NA	Chr2	6877773	6880898	0.702148	0.677977	6864000	6866000	AT2G15760	Chr2	6865609	6866877	0.737713	0.806944	NA	1100	interaction126709	2-6876000	+	591	2-6864000	+	653	10755	11	0.069862	-18.493282	7.4e-05	5	0.069862	500	-5.617877	835	1027	-3.46115	600	600	6	-0.661341	0.00269540473106858	-1.38441	0.00682445357234255
14790000	14792000	AT5G37340	NA	Chr5	14787263	14792772	0.711393	0.64846	14768000	14770000	AT5G37300	Chr5	14767498	14770249	3.77137	4.94445	yes	1100	interaction371490	5-14790000	+	748	5-14768000	+	710	21664	11	0.069862	-18.480239	7.4e-05	5	0.069862	500	-5.616222	1069	1328	-3.45813	600	600	6	0.789982	3.99448331471787e-06	2.54482	0.0099224325822217
5016000	5018000	AT1G14620	NA	Chr1	5014752	5016604	0.75829	0.791636	4998000	5000000	AT1G14590	Chr1	4998815	5000643	0.861994	0.89304	yes	1100	interaction17504	1-5016000	+	612	1-4998000	+	917	17339	11	0.069862	-18.490609	7.4e-05	5	0.069862	500	-5.615807	1150	1587	-3.45737	600	600	6	-0.837903	1.29408920582584e-11	0.853156	2.82970248824293e-08
1156000	1158000	AT5G04220	NA	Chr5	1155864	1158877	0.826017	0.828186	1130000	1132000	AT5G04140	Chr5	1129851	1138442	0.747643	0.588822	NA	1571.943439	interaction323869	5-1156000	+	2687	5-1130000	+	1925	25758	24	0.106663	-55.876224	0	20	0.135532	1030.932197	-43.348459	3867	2794	-3.45694	541.011242	541.011	20	1.24991	7.51143612184431e-06	7.40463	1.23797485802098e-227
20614000	20616000	AT1G55260	yes	Chr1	20614609	20616436	3.74976	3.77589	20590000	20592000	AT1G55200	Chr1	20589128	20592063	0.604853	0.626353	NA	1100	interaction69105	1-20614000	+	1457	1-20590000	+	991	23727	11	0.069862	-18.461923	7.4e-05	5	0.069862	500	-5.614605	2335	1473	-3.45518	600	600	6	3.83115	1.76985233239162e-23	1.99603	2.32201414589126e-05
25402000	25404000	AT1G67750	yes	Chr1	25401587	25403503	1.8317	1.81608	25370000	25372000	AT1G67690	Chr1	25369085	25373730	0.766901	0.707781	NA	1100	interaction85917	1-25402000	+	1504	1-25370000	+	912	31675	11	0.069862	-18.465927	7.4e-05	5	0.069862	500	-5.61439	2737	1551	-3.45478	600	600	6	-1.0531	6.64883961661695e-05	0.495067	0.00335934046323192
4188000	4190000	AT3G13065	NA	Chr3	4187370	4191298	0.567012	0.566254	4170000	4172000	AT3G13030	Chr3	4169540	4172051	0.708265	0.63881	NA	1100	interaction185817	3-4188000	+	1128	3-4170000	+	1272	17674	11	0.069862	-18.456315	7.4e-05	5	0.069862	500	-5.614377	1556	2187	-3.45476	600	600	6	2.20878	1.562521986471e-10	0.456187	0.00231015703499539
4204000	4206000	AT3G13090	NA	Chr3	4203012	4208171	0.464726	0.501133	4188000	4190000	AT3G13065	Chr3	4187370	4191298	0.567012	0.566254	NA	1100	interaction185887	3-4204000	+	993	3-4188000	+	1128	15777	11	0.069862	-18.46183	7.4e-05	5	0.069862	500	-5.614377	1920	1556	-3.45476	600	600	6	-1.57465	0.000114682682392851	2.20878	1.562521986471e-10
17300000	17302000	AT5G43100	NA	Chr5	17299122	17303058	0.811514	0.800273	17260000	17262000	AT5G43030	Chr5	17258990	17260685	3.1907	2.85145	yes	1100	interaction379493	5-17300000	+	1013	5-17260000	+	1500	40486	11	0.069862	-18.46092	7.4e-05	5	0.069862	500	-5.614058	1689	2732	-3.45418	600	600	6	-0.729697	8.94424403067994e-07	-4.7124	1.98550882829519e-34
448000	450000	AT1G02280	NA	Chr1	448462	450426	0.786579	0.67923	420000	422000	AT1G02205	Chr1	418747	422438	2.41232	2.30668	yes	1100	interaction1490	1-448000	+	1148	1-420000	+	1018	27884	11	0.069862	-18.460698	7.4e-05	5	0.069862	500	-5.613821	1804	1948	-3.45375	600	600	6	2.14279	1.64260645426336e-32	4.55936	5.78351815158699e-28
9668000	9670000	AT5G27380	yes	Chr5	9667970	9670962	1.16697	1.18169	9608000	9610000	AT5G27270	Chr5	9605649	9609787	0.741718	0.695569	NA	1100	interaction353270	5-9668000	+	1307	5-9608000	+	1566	60248	11	0.069862	-18.450764	7.4e-05	5	0.069862	500	-5.613502	1985	2236	-3.45316	600	600	6	0.681583	1.35404843010746e-09	0.732346	1.00205881905164e-09
8796000	8798000	AT2G20390	NA	Chr2	8796282	8798218	0.715834	0.690677	8768000	8770000	AT2G20320	Chr2	8766738	8772591	0.737171	0.663394	NA	1100	interaction133499	2-8796000	+	1419	2-8768000	+	1250	27855	11	0.069862	-18.452359	7.4e-05	5	0.069862	500	-5.613408	2088	2046	-3.45299	600	600	6	-0.424918	0.011303847937302	-1.32309	7.11101545248526e-38
18542000	18544000	AT1G50040	NA	Chr1	18542129	18543948	0.58574	0.751203	18502000	18504000	AT1G49970	Chr1	18501569	18504609	0.869053	0.794181	NA	1100	interaction62182	1-18542000	+	1357	1-18502000	+	1651	40158	11	0.069862	-18.449476	7.4e-05	5	0.069862	500	-5.613349	2086	2563	-3.45289	600	600	6	1.49325	0.0237521285391637	2.62727	1.02330365089997e-136
3282000	3284000	AT1G10050	NA	Chr1	3279269	3283482	0.633762	0.645018	3228000	3230000	AT1G09930	Chr1	3227489	3230043	2.08826	1.66754	yes	502.433894	interaction11669	1-3282000	+	2284	1-3228000	+	2657	53225	9	0.125142	-13.709992	0.007132	8	0.23632	236.499583	-11.494062	3718	5067	-3.45258	265.934312	265.934	4	-1.71792	6.279419636184e-31	-3.24334	0.000662543924739576
20446000	20448000	AT3G55160	NA	Chr3	20445411	20452400	0.659661	0.607055	20434000	20436000	AT3G55130	Chr3	20433877	20436390	3.19462	4.2781	yes	2586.660821	interaction244654	3-20446000	+	1663	3-20434000	+	2599	11771	33	0.089128	-86.325261	0	35	0.134363	1819.830426	-93.330937	2531	4232	-3.4514	766.830396	766.83	32	-0.555484	0.0488099497378342	5.86438	7.5614483398405e-129
25000000	25002000	AT1G66980	yes	Chr1	24997308	25001983	0.80125	1.88024	24988000	24990000	AT1G66960	Chr1	24984940	24989797	2.11796	2.81176	yes	1900	interaction84444	1-25000000	+	1444	1-24988000	+	1245	11851	19	0.069862	-40.41265	0	11	0.069862	1100	-18.443368	1658	1740	-3.45087	800	800	14	7.38135	0	-3.92277	8.31383842294798e-06
24444000	24446000	AT1G65730	yes	Chr1	24442503	24446291	2.31589	2.71992	24418000	24420000	AT1G65660	Chr1	24418106	24421292	0.862374	0.885667	yes	1742.994258	interaction82457	1-24444000	+	2652	1-24418000	+	1759	26325	24	0.096196	-55.888765	0	19	0.115976	1144.529966	-40.353135	3870	2389	-3.44899	598.464293	598.464	20	-2.97413	9.28649100536923e-27	0.661344	2.52718171461493e-08
27514000	27516000	AT1G73170	NA	Chr1	27511660	27514797	0.791248	0.70496	27500000	27502000	AT1G73130	Chr1	27499034	27502055	0.728275	0.703478	NA	1900	interaction92715	1-27514000	+	1146	1-27500000	+	1532	13670	19	0.069862	-40.423421	0	11	0.069862	1100	-18.437425	2115	2580	-3.44766	800	800	14	1.65866	5.34520355027596e-22	-1.18079	8.34415727925981e-09
15918000	15920000	AT4G32980	NA	Chr4	15914721	15918044	0.784996	2.03499	15912000	15914000	AT4G32970	Chr4	15910344	15914337	0.711706	0.690183	yes	3600	interaction311389	4-15918000	+	817	4-15912000	+	1094	5612	36	0.069862	-97.432559	0	25	0.069862	2500	-59.197318	1196	1597	-3.43134	1100	1100	36	6.9929	1.24621049970409e-113	0.643238	0.0325318971225514
7402000	7404000	AT5G22355	yes	Chr5	7401706	7403825	1.32679	1.69675	7380000	7382000	AT5G22300	Chr5	7379198	7381935	1.5675	2.67807	yes	1418.8943	interaction345611	5-7402000	+	2061	5-7380000	+	2317	22112	20	0.098474	-43.370416	0	25	0.195623	892.813543	-59.040662	4289	3636	-3.41703	526.080757	526.081	16	-4.84654	4.42054091220483e-26	2.25654	4.54898515693054e-06
9500000	9502000	AT4G16890	NA	Chr4	9500505	9505455	0.596102	0.578236	9494000	9496000	AT4G16860	Chr4	9488465	9495816	0.753631	0.663132	NA	1500	interaction289070	4-9500000	+	1195	4-9494000	+	492	5899	15	0.069862	-29.022924	0	8	0.069862	800	-11.527379	1288	550	-3.40814	700	700	10	2.55938	2.02741479868906e-44	3.98441	5.62444500461666e-89
3228000	3230000	AT1G09930	yes	Chr1	3227489	3230043	2.08826	1.66754	3222000	3224000	AT1G09910	Chr1	3220034	3224541	0.723316	0.677128	NA	6520.221675	interaction11521	1-3228000	+	2657	1-3222000	+	1408	6091	72	0.077146	-241.761374	0	104	0.139517	5207.731586	-385.681682	5067	2195	-3.40418	1312.490089	1312.49	90	-3.24334	0.000662543924739576	0.411279	9.98878235587565e-06
12398000	12400000	AT4G23820	NA	Chr4	12397037	12400091	0.779557	0.979677	12384000	12386000	AT4G23770	Chr4	12383310	12384496	0.787995	0.863599	NA	1500	interaction298980	4-12398000	+	1076	4-12384000	+	468	13637	15	0.069862	-29.032676	0	8	0.069862	800	-11.515991	1616	775	-3.39873	700	700	10	4.01275	1.03440822678515e-44	4.79235	4.00670195943098e-36
26222000	26224000	AT1G69710	NA	Chr1	26222071	26226652	0.606368	0.616128	26216000	26218000	AT1G69690	Chr1	26216223	26217851	1.63203	4.40759	yes	1500	interaction88546	1-26222000	+	515	1-26216000	+	1518	6464	15	0.069862	-29.01444	0	8	0.069862	800	-11.515498	789	1888	-3.39832	700	700	10	-1.3754	0.0166193757022763	2.4756	4.15266228723442e-11
3270000	3272000	AT1G10020	NA	Chr1	3269603	3271987	0.675892	0.700578	3228000	3230000	AT1G09930	Chr1	3227489	3230043	2.08826	1.66754	yes	782.782411	interaction11631	1-3270000	+	1466	1-3228000	+	2657	41367	9	0.080323	-13.716953	0.007132	9	0.167611	375.130311	-13.708324	2637	5067	-3.39071	407.6521	407.652	4	1.57331	3.27200667717351e-07	-3.24334	0.000662543924739576
5322000	5324000	AT1G15490	NA	Chr1	5320614	5323895	0.55817	0.567678	5312000	5314000	AT1G15460	Chr1	5310000	5314094	0.843919	0.862657	yes	1500	interaction18551	1-5322000	+	684	1-5312000	+	962	10585	15	0.069862	-28.969742	0	8	0.069862	800	-11.506029	1209	1796	-3.39054	700	700	10	-0.73782	1.11724592165418e-14	-5.22693	5.6601037163429e-22
2500000	2502000	AT4G04920	yes	Chr4	2497643	2505535	0.660395	0.702013	2490000	2492000	AT4G04910	Chr4	2489416	2495766	0.781356	0.783627	yes	1500	interaction264528	4-2500000	+	1282	4-2490000	+	748	9458	15	0.069862	-28.958127	0	8	0.069862	800	-11.505941	2016	1215	-3.39047	700	700	10	-0.657397	2.9838677288452e-12	-0.577601	4.97832866191823e-09
16178000	16180000	AT2G38695	NA	Chr2	16177940	16180403	0.665025	0.574686	16170000	16172000	AT2G38670	Chr2	16168836	16171918	0.822601	0.802284	NA	1500	interaction159369	2-16178000	+	717	2-16170000	+	984	7611	15	0.069862	-28.963492	0	8	0.069862	800	-11.504952	1287	1660	-3.38966	700	700	10	1.45521	6.36181432191959e-19	0.423322	0.00562999153145198
36000	38000	AT3G01100	NA	Chr3	34718	38529	0.713424	0.719143	20000	22000	AT3G01070	Chr3	19591	20719	0.702019	0.703481	yes	1500	interaction171145	3-36000	+	1045	3-20000	+	817	16242	15	0.069862	-28.947657	0	8	0.069862	800	-11.504462	1681	1326	-3.38925	700	700	10	-0.817856	1.90806413818805e-09	-3.44923	5.79780842022492e-16
6846000	6848000	AT5G20280	NA	Chr5	6844713	6850154	0.787978	0.661643	6822000	6824000	AT5G20220	Chr5	6821989	6825981	0.752102	0.979611	yes	1500	interaction343702	5-6846000	+	1949	5-6822000	+	875	24144	15	0.069862	-28.940141	0	8	0.069862	800	-11.503661	2710	1395	-3.3886	700	700	10	0.98447	1.30188594802346e-18	2.90305	2.08045361629059e-37
23208000	23210000	AT3G62730	yes	Chr3	23207853	23209471	2.80861	2.24924	23190000	23192000	AT3G62700	Chr3	23190266	23195762	0.800413	0.716215	yes	1300	interaction254127	3-23208000	+	1260	3-23190000	+	1402	18232	13	0.069862	-23.531358	1e-06	8	0.078069	715.899743	-11.497975	2811	2214	-3.38395	584.100257	584.1	8	-2.93643	1.43808732039627e-06	0.666003	6.68589162291557e-09
4018000	4020000	AT5G12400	NA	Chr5	4013812	4021543	0.764959	0.679487	4006000	4008000	AT5G12370	Chr5	4002774	4008804	1.09005	0.989963	NA	4067.992871	interaction333749	5-4018000	+	1289	5-4006000	+	2972	11688	46	0.078998	-134.709091	0	57	0.129969	3063.905248	-178.078227	2221	4665	-3.34254	1004.087623	1004.09	50	-0.525431	3.52911234887999e-08	0.480932	2.20074806251269e-06
25760000	25762000	AT1G68600	yes	Chr1	25759841	25762934	1.15969	1.74583	25754000	25756000	AT1G68580	Chr1	25752734	25756076	0.787118	0.79321	NA	3100	interaction87101	1-25760000	+	995	1-25754000	+	1031	5474	31	0.069862	-79.502996	0	21	0.069862	2100	-46.461066	1674	1503	-3.31431	1000	1000	28	5.5984	9.72967449435932e-51	0.371677	0.000372875290674022
19388000	19390000	AT2G47230	NA	Chr2	19387019	19390234	0.674387	0.657298	19380000	19382000	AT2G47210	Chr2	19378868	19382418	0.858463	0.734469	yes	2000	interaction169934	2-19388000	+	873	2-19380000	+	604	7144	20	0.069862	-43.574209	0	12	0.069862	1200	-20.957961	1584	1106	-3.30814	800	800	16	1.30184	0.000224933651120651	0.453048	3.84623870702808e-08
9354000	9356000	AT3G25690	NA	Chr3	9353009	9357953	0.790258	0.679135	9350000	9352000	AT3G25680	Chr3	9349611	9352427	0.855694	0.743034	NA	8200	interaction203896	3-9354000	+	1096	3-9350000	+	1119	3818	82	0.069862	-286.49682	0	66	0.069862	6600	-216.033224	1395	1711	-3.30118	1600	1600	106	4.50534	0	1.08114	5.73567555886036e-22
6546000	6548000	AT3G18980	yes	Chr3	6546462	6548062	0.827557	0.933957	6524000	6526000	AT3G18930	Chr3	6523378	6525543	0.660308	0.864071	NA	2000	interaction194100	3-6546000	+	1498	3-6524000	+	1183	22154	20	0.069862	-43.432749	0	12	0.069862	1200	-20.936345	2277	1936	-3.29843	800	800	16	1.44324	1.34731996546789e-11	0.688136	0.0145973044063898
22560000	22562000	AT1G61190	NA	Chr1	22557601	22560687	0.581999	0.427109	22534000	22536000	AT1G61140	Chr1	22534716	22540850	0.844031	0.820622	NA	1700	interaction75766	1-22560000	+	2060	1-22534000	+	1281	25717	17	0.069862	-34.542568	0	12	0.080656	1039.40613	-20.93334	2974	2162	-3.29708	660.59387	660.594	12	5.31248	0	-0.696563	1.64313013354489e-05
8862000	8864000	AT1G25280	yes	Chr1	8863776	8866805	0.731514	0.836521	8860000	8862000	AT1G25275	Chr1	8860670	8861364	0.79989	0.981756	yes	8500	interaction30988	1-8862000	+	551	1-8860000	+	1044	1282	85	0.069862	-303.441543	0	69	0.069862	6900	-229.551469	983	1460	-3.2685	1600	1600	112	-0.481043	0.000346964420273692	2.08691	2.92187229305034e-56
4412000	4414000	AT5G13680	NA	Chr5	4410360	4415471	0.669064	0.600998	4390000	4392000	AT5G13630	Chr5	4387333	4392227	0.665702	0.483544	NA	1574.350911	interaction335170	5-4412000	+	1744	5-4390000	+	2221	21820	18	0.079875	-37.420058	0	14	0.09959	982.094643	-26.151589	2705	2935	-3.26316	592.256268	592.256	14	-0.287357	0.0126928024427956	6.54019	5.54735578899884e-181
17888000	17890000	AT3G48310	yes	Chr3	17888100	17889814	2.61368	3.3304	17874000	17876000	AT3G48260	Chr3	17873011	17875220	2.39485	2.18912	yes	2991.448995	interaction235883	3-17888000	+	2255	3-17874000	+	1808	13968	36	0.084074	-97.023968	0	34	0.109264	2173.907698	-89.737804	3052	2854	-3.26131	817.541296	817.541	36	9.15888	2.91192112995899e-53	-1.57629	1.85857231501173e-07
2984000	2986000	AT1G09240	yes	Chr1	2984880	2986130	2.75664	3.13457	2960000	2962000	AT1G09170	Chr1	2956588	2962207	0.588041	0.652977	NA	900	interaction10646	1-2984000	+	1687	1-2960000	+	1546	24446	9	0.069862	-13.715946	0.007132	6	0.094427	443.911306	-7.43229	2893	2602	-3.24788	456.088694	456.089	4	6.94794	8.81099451423316e-24	-2.92254	1.65511213746981e-09
5532000	5534000	AT1G16150	NA	Chr1	5532414	5534877	0.550673	0.561593	5520000	5522000	AT1G16110	Chr1	5518372	5520891	0.694111	0.549606	NA	3300	interaction19351	1-5532000	+	2115	1-5520000	+	1483	12074	33	0.069862	-86.362036	0	33	0.097425	2366.385374	-86.231978	3228	2406	-3.24097	933.614626	933.615	32	-2.3512	2.91053217266538e-08	1.07539	0.000129305011370724
22926000	22928000	AT1G62030	yes	Chr1	22924249	22926598	1.59528	2.66756	22920000	22922000	AT1G62020	Chr1	22919533	22924024	0.742386	0.781781	NA	11528.041547	interaction76940	1-22926000	+	1930	1-22920000	+	1812	5522	119	0.072116	-457.913725	0	150	0.107011	9792.771976	-610.045011	2786	3062	-3.21941	1735.269571	1735.27	170	3.83014	6.60645003715877e-26	-0.518815	1.25755673613423e-10
9668000	9670000	AT5G27380	yes	Chr5	9667970	9670962	1.16697	1.18169	9658000	9660000	AT5G27360	Chr5	9657025	9662559	0.818138	1.15225	NA	1600	interaction353278	5-9668000	+	1307	5-9658000	+	317	9921	16	0.069862	-31.950304	0	9	0.069862	900	-13.752813	1985	517	-3.21754	700	700	10	0.681583	1.35404843010746e-09	4.12782	5.69278319660604e-38
20914000	20916000	AT5G51490	yes	Chr5	20913552	20915606	2.76235	3.43066	20900000	20902000	AT5G51460	Chr5	20900976	20904539	0.845333	0.810146	yes	1600	interaction391426	5-20914000	+	2589	5-20900000	+	383	14213	16	0.069862	-31.891	0	9	0.069862	900	-13.744807	4525	604	-3.21246	700	700	10	-6.66429	1.76985233239162e-23	1.05811	3.60813573207475e-06
10690000	10692000	AT1G30330	NA	Chr1	10685821	10690838	0.78487	0.723076	10682000	10684000	AT1G30320	Chr1	10680245	10682954	0.80321	0.714908	yes	1600	interaction37476	1-10690000	+	387	1-10682000	+	540	7403	16	0.069862	-31.888066	0	9	0.069862	900	-13.740384	666	833	-3.20967	700	700	10	0.640475	1.36608100803189e-05	0.748866	1.52455045245531e-07
12246000	12248000	AT4G23460	NA	Chr4	12243670	12248950	0.726717	0.707979	12230000	12232000	AT4G23430	Chr4	12229025	12231658	0.629163	0.768114	NA	1695.180384	interaction298444	4-12246000	+	2047	4-12230000	+	1855	16101	19	0.078303	-40.371747	0	20	0.129307	1080.559285	-43.341717	3137	3286	-3.2044	614.621099	614.621	14	-0.258138	0.0173832009782707	-0.969221	0.00220348796512555
452000	454000	AT2G01970	NA	Chr2	451870	454885	0.803832	0.769045	434000	436000	AT2G01940	Chr2	432274	435077	3.35519	3.80095	yes	1600	interaction103532	2-452000	+	1511	2-434000	+	653	17836	16	0.069862	-31.774366	0	9	0.069862	900	-13.723149	2298	1112	-3.19882	700	700	10	-0.490886	1.32641003126684e-10	2.52499	5.52099639951322e-33
23658000	23660000	AT1G63770	NA	Chr1	23657505	23664677	0.817731	0.776639	23640000	23642000	AT1G63730	Chr1	23641769	23645132	0.774751	0.665389	NA	1600	interaction79483	1-23658000	+	2303	1-23640000	+	675	17825	16	0.069862	-31.769009	0	9	0.069862	900	-13.720481	3604	1241	-3.19715	700	700	10	0.256064	0.0481110763202539	-1.29164	2.68921799870403e-22
16932000	16934000	AT3G46110	NA	Chr3	16932111	16933726	0.627438	0.806188	16918000	16920000	AT3G46060	Chr3	16917588	16920018	0.904799	0.915567	yes	1600	interaction232235	3-16932000	+	964	3-16918000	+	1152	13696	16	0.069862	-31.721486	0	9	0.069862	900	-13.718031	1389	2036	-3.19562	700	700	10	2.31946	1.07340498817696e-19	-0.623174	1.14387319756794e-07
16822000	16824000	AT3G45780	yes	Chr3	16816865	16824210	0.877523	0.924453	16794000	16796000	AT3G45750	Chr3	16793610	16797947	0.815121	0.762467	NA	1600	interaction231817	3-16822000	+	1568	3-16794000	+	1492	28327	16	0.069862	-31.682393	0	9	0.069862	900	-13.712001	1967	2195	-3.19185	700	700	10	3.65161	3.97778233422675e-123	0.623632	7.05845584704315e-07
21168000	21170000	AT1G56510	yes	Chr1	21167588	21173632	1.01342	1.77375	21160000	21162000	AT1G56500	Chr1	21159743	21167321	0.857098	0.765229	NA	1200	interaction71121	1-21168000	+	377	1-21160000	+	669	7704	12	0.069862	-21.056408	6e-06	6	0.069862	600	-7.45759	355	826	-3.18883	600	600	6	7.00144	6.28193826751109e-75	4.0111	3.33265162847515e-131
21176000	21178000	AT1G56520	yes	Chr1	21174663	21178974	1.14379	2.14797	21168000	21170000	AT1G56510	Chr1	21167588	21173632	1.01342	1.77375	yes	1200	interaction71176	1-21176000	+	1795	1-21168000	+	377	8465	12	0.069862	-21.056408	6e-06	6	0.069862	600	-7.45759	1926	355	-3.18883	600	600	6	6.81212	1.85283684800453e-72	7.00144	6.28193826751109e-75
14578000	14580000	AT4G29780	NA	Chr4	14579703	14581700	0.627698	0.956299	14572000	14574000	AT4G29750	Chr4	14569727	14573177	0.832072	0.763565	yes	1200	interaction306950	4-14578000	+	245	4-14572000	+	1199	5744	12	0.069862	-21.138056	6e-06	6	0.069862	600	-7.455871	377	1875	-3.18685	600	600	6	1.53551	8.63596924630094e-05	1.82844	1.69953233665432e-53
12508000	12510000	AT2G29110	yes	Chr2	12506879	12510552	2.10031	2.2937	12444000	12446000	AT2G28970	Chr2	12443918	12448163	2.60862	3.17103	yes	1224.985201	interaction146127	2-12508000	+	2632	2-12444000	+	1366	63674	13	0.07414	-23.527237	1e-06	11	0.109556	701.451555	-18.436186	3892	2244	-3.18595	523.533646	523.534	8	-2.08381	0.0123179555707828	-5.31659	4.18982468697422e-130
21822000	21824000	AT5G53760	yes	Chr5	21822485	21826451	0.737791	0.740586	21794000	21796000	AT5G53660	Chr5	21794535	21796046	0.648971	0.694388	NA	1500	interaction394469	5-21822000	+	1425	5-21794000	+	2138	28254	15	0.069862	-28.8994	0	13	0.101034	898.912274	-23.506885	2340	3442	-3.18188	601.087726	601.088	10	-1.10126	0.00247853433120843	6.02308	1.42447830296929e-09
3482000	3484000	AT5G11010	NA	Chr5	3483703	3486267	0.772771	0.708349	3472000	3474000	AT5G10980	Chr5	3472404	3473466	0.665542	0.94607	yes	1200	interaction331885	5-3482000	+	296	5-3472000	+	967	9838	12	0.069862	-21.097743	6e-06	6	0.069862	600	-7.447304	546	1586	-3.17699	600	600	6	0.238194	0.0288920183819075	-0.418099	0.00238731247886676
9510000	9512000	AT4G16900	NA	Chr4	9511858	9516541	0.627999	0.562104	9494000	9496000	AT4G16860	Chr4	9488465	9495816	0.753631	0.663132	NA	1200	interaction289119	4-9510000	+	2647	4-9494000	+	492	16056	12	0.069862	-21.021318	6e-06	6	0.069862	600	-7.447166	3010	550	-3.17683	600	600	6	1.16585	7.73801154939317e-22	3.98441	5.62444500461666e-89
16384000	16386000	AT4G34220	NA	Chr4	16381505	16384194	0.671098	0.706569	16376000	16378000	AT4G34200	Chr4	16373818	16376622	0.675754	0.669007	NA	1200	interaction313103	4-16384000	+	437	4-16376000	+	760	8895	12	0.069862	-21.035772	6e-06	6	0.069862	600	-7.443871	666	1357	-3.17306	600	600	6	4.19873	3.41110064688504e-100	-1.02603	5.02661804720429e-09
17378000	17380000	AT4G36890	yes	Chr4	17379174	17381780	0.750242	0.776109	17372000	17374000	AT4G36870	Chr4	17368964	17373930	1.23957	4.01192	yes	1200	interaction316367	4-17378000	+	569	4-17372000	+	502	5690	12	0.069862	-21.019033	6e-06	6	0.069862	600	-7.443113	1006	700	-3.17219	600	600	6	-0.823276	0.000216407279102023	3.88858	2.36134279072347e-17
14804000	14806000	AT5G37360	NA	Chr5	14805228	14808236	0.846577	0.674687	14788000	14790000	AT5G37340	Chr5	14787263	14792772	0.711393	0.64846	NA	1200	interaction371547	5-14804000	+	625	5-14788000	+	1623	16501	12	0.069862	-20.996955	6e-06	6	0.069862	600	-7.440611	842	2352	-3.16934	600	600	6	4.26999	1.42090056231215e-133	0.789982	3.99448331471787e-06
23174000	23176000	AT3G62660	NA	Chr3	23172805	23174762	0.633992	0.746495	23164000	23166000	AT3G62630	Chr3	23163746	23165195	0.65041	0.95793	yes	1200	interaction253995	3-23174000	+	542	3-23164000	+	860	9786	12	0.069862	-21.010745	6e-06	6	0.069862	600	-7.438041	1064	1288	-3.16641	600	600	6	0.791162	0.00223931436977202	1.47807	1.59575123112932e-11
16058000	16060000	AT4G33330	yes	Chr4	16059753	16063070	2.1475	2.20748	16044000	16046000	AT4G33270	Chr4	16044351	16046792	0.395653	0.388945	NA	1200	interaction311886	4-16058000	+	681	4-16044000	+	743	13996	12	0.069862	-20.989563	7e-06	6	0.069862	600	-7.437941	1075	1305	-3.1663	600	600	6	-2.48724	5.25679695764001e-12	0.995384	0.0017977692054308
9560000	9562000	AT4G16990	yes	Chr4	9560134	9565555	1.59986	2.69044	9538000	9540000	AT4G16950	Chr4	9538797	9544467	0.398034	0.329196	NA	1200	interaction289352	4-9560000	+	1293	4-9538000	+	1361	21709	12	0.069862	-20.950661	7e-06	6	0.069862	600	-7.436461	1270	1561	-3.16462	600	600	6	7.82268	3.13637103124229e-138	2.61975	7.22284784353196e-50
6684000	6686000	AT5G19770	NA	Chr5	6682492	6684579	0.494597	0.540409	6674000	6676000	AT5G19740	Chr5	6673932	6676859	0.599718	0.611774	yes	1200	interaction343191	5-6684000	+	856	5-6674000	+	872	9277	12	0.069862	-20.97273	7e-06	6	0.069862	600	-7.436347	1288	1514	-3.16449	600	600	6	0.58756	0.0164107870180413	-1.62873	1.07417375021701e-51
2282000	2284000	AT1G07430	yes	Chr1	2280834	2282828	3.25452	3.58823	2270000	2272000	AT1G07390	Chr1	2269892	2274820	0.701622	0.638696	NA	1200	interaction8050	1-2282000	+	831	1-2270000	+	1169	11947	12	0.069862	-20.974699	7e-06	6	0.069862	600	-7.436188	1314	1729	-3.16431	600	600	6	2.36952	0.00256879819680021	1.45698	4.45880399911328e-11
740000	742000	AT1G03090	NA	Chr1	739678	744184	0.808108	0.67933	716000	718000	AT1G03060	Chr1	712472	726891	0.71105	0.640518	NA	1200	interaction2398	1-740000	+	882	1-716000	+	2624	23928	12	0.069862	-20.970802	7e-06	6	0.069862	600	-7.436134	1323	3711	-3.16425	600	600	6	1.04789	0.000312712631433498	-0.531658	0.00200253536972067
16690000	16692000	AT5G41740	NA	Chr5	16688625	16693119	0.648727	0.656384	16664000	16666000	AT5G41670	Chr5	16665282	16667171	0.721356	0.736274	NA	1200	interaction377577	5-16690000	+	1963	5-16664000	+	769	25429	12	0.069862	-20.980135	7e-06	6	0.069862	600	-7.435361	2640	1468	-3.16337	600	600	6	2.91531	3.17850605870041e-48	-0.957394	1.26745289053322e-05
25354000	25356000	AT5G63220	yes	Chr5	25353033	25355500	0.820611	0.764918	25342000	25344000	AT5G63180	Chr5	25340953	25343119	2.8436	4.28565	yes	1200	interaction406022	5-25354000	+	802	5-25342000	+	1157	12766	12	0.069862	-20.977136	7e-06	6	0.069862	600	-7.435257	1490	1706	-3.16325	600	600	6	-0.246704	0.00995206148043741	6.96609	1.43334934643919e-239
13482000	13484000	AT4G26770	NA	Chr4	13482073	13484849	0.549746	0.597076	13462000	13464000	AT4G26700	Chr4	13463115	13467601	0.75024	0.569457	NA	1200	interaction303037	4-13482000	+	1681	4-13462000	+	1155	19666	12	0.069862	-20.955819	7e-06	6	0.069862	600	-7.43482	2588	1590	-3.16276	600	600	6	-4.61832	7.18341510176101e-16	3.57508	2.00613259488823e-31
8328000	8330000	AT5G24390	NA	Chr5	8326606	8329490	0.56595	0.630088	8304000	8306000	AT5G24350	Chr5	8301104	8310895	0.754534	0.698018	NA	1200	interaction348761	5-8328000	+	1296	5-8304000	+	993	23310	12	0.069862	-20.963712	7e-06	6	0.069862	600	-7.434692	1985	1622	-3.16261	600	600	6	-2.30688	1.25030128402338e-33	-0.412952	0.0143558237320144
25000000	25002000	AT1G66980	yes	Chr1	24997308	25001983	0.80125	1.88024	24964000	24966000	AT1G66920	Chr1	24965303	24967522	0.736714	1.02584	yes	1200	interaction84434	1-25000000	+	1444	1-24964000	+	1536	36386	12	0.069862	-20.94615	7e-06	6	0.069862	600	-7.434553	1658	2006	-3.16245	600	600	6	7.38135	0	4.75331	9.20572111395409e-46
24962000	24964000	AT1G66910	yes	Chr1	24961633	24963946	0.832049	1.58514	24934000	24936000	AT1G66840	Chr1	24933855	24936322	0.91436	1.4573	yes	1200	interaction84175	1-24962000	+	1603	1-24934000	+	1249	28241	12	0.069862	-20.952181	7e-06	6	0.069862	600	-7.434218	1981	1752	-3.16207	600	600	6	5.73694	4.28099263781876e-86	4.34791	5.95688477618579e-71
24204000	24206000	AT1G65150	yes	Chr1	24203840	24205775	1.27606	1.32766	24170000	24172000	AT1G65060	Chr1	24167201	24171502	1.43039	1.49103	yes	1200	interaction81458	1-24204000	+	1736	1-24170000	+	1087	33969	12	0.069862	-20.958844	7e-06	6	0.069862	600	-7.43357	2393	1968	-3.16134	600	600	6	0.819333	0.00387345556361415	2.36547	4.90207870025058e-14
24050000	24052000	AT1G64740	NA	Chr1	24050005	24052487	0.74296	0.729853	24024000	24026000	AT1G64650	Chr1	24023497	24026421	0.748617	0.671778	NA	1100	interaction80793	1-24050000	+	1382	1-24024000	+	1701	26140	11	0.069862	-18.448867	7.4e-05	6	0.075457	555.507988	-7.433287	2080	2892	-3.16102	544.492012	544.492	6	1.05015	0.000137205001050461	-0.484874	0.000764505935040988
566000	568000	AT1G02640	NA	Chr1	564204	567769	0.603433	0.961947	562000	564000	AT1G02630	Chr1	560609	562424	0.8191	0.909611	yes	4800	interaction1818	1-566000	+	1078	1-562000	+	1039	3999	48	0.069862	-142.711109	0	36	0.069862	3600	-97.100883	1523	1470	-3.15811	1200	1200	52	0.530188	0.00236201491683986	2.79735	2.71793478782821e-05
8636000	8638000	AT1G24340	NA	Chr1	8635208	8638986	0.740307	0.654857	8628000	8630000	AT1G24320	Chr1	8626314	8630971	0.562146	0.570829	NA	3300	interaction30351	1-8636000	+	1373	1-8628000	+	1319	8228	33	0.069862	-86.404358	0	23	0.069862	2300	-52.691097	2037	1832	-3.15627	1000	1000	32	0.359846	0.0110818852321153	-5.80042	1.71926741900009e-34
18590000	18592000	AT5G45830	yes	Chr5	18589481	18591400	3.21521	4.71936	18584000	18586000	AT5G45810	Chr5	18584941	18586393	1.20212	1.35297	yes	4800	interaction383653	5-18590000	+	1250	5-18584000	+	1106	5539	48	0.069862	-142.646045	0	36	0.069862	3600	-97.062756	1695	1620	-3.15373	1200	1200	52	6.29439	2.40906965770603e-59	-2.81464	2.65907637762364e-06
3240000	3242000	AT3G10420	NA	Chr3	3239179	3242537	0.730906	0.652518	3214000	3216000	AT3G10360	Chr3	3210883	3215556	0.712071	0.64677	NA	900	interaction182375	3-3240000	+	1905	3-3214000	+	1731	26161	9	0.069862	-13.713976	0.007132	8	0.123274	453.377066	-11.495471	3290	2987	-3.13979	446.622934	446.623	4	2.34309	6.79219784901263e-32	0.539767	0.00129771611259166
3580000	3582000	AT5G11230	yes	Chr5	3580561	3581617	1.4783	0.695903	3564000	3566000	AT5G11190	Chr5	3564975	3566051	3.96047	4.32923	yes	1800	interaction332197	5-3580000	+	1145	5-3564000	+	1171	15972	18	0.069862	-37.461374	0	13	0.079471	1142.819396	-23.504881	2517	2517	-3.13467	657.180604	657.181	14	-3.47622	2.59521283015197e-75	6.19349	1.13564301034683e-13
9306000	9308000	AT2G21840	yes	Chr2	9307059	9310058	1.52404	1.44172	9288000	9290000	AT2G21770	Chr2	9284836	9289536	0.609864	0.639821	yes	1400	interaction135482	2-9306000	+	2010	2-9288000	+	1521	18428	14	0.069862	-26.174278	0	11	0.092465	831.102488	-18.435606	3191	2310	-3.10397	568.897512	568.898	8	-4.9492	6.84443166327618e-73	2.53483	2.76957978424675e-07
10720000	10722000	AT2G25170	NA	Chr2	10713806	10723986	0.814607	0.731178	10694000	10696000	AT2G25130	Chr2	10695181	10697000	1.32317	1.43538	yes	1542.664241	interaction140131	2-10720000	+	1933	2-10694000	+	2045	25329	18	0.081516	-37.412354	0	16	0.113638	983.646851	-31.649062	2809	3225	-3.09098	559.01739	559.017	14	0.509542	0.00905829422291053	-1.5474	0.00022631806628964
20542000	20544000	AT3G55410	NA	Chr3	20541434	20546034	0.69901	0.716383	20528000	20530000	AT3G55370	Chr3	20527062	20529291	4.6412	3.61751	yes	1800	interaction245042	3-20542000	+	2092	3-20528000	+	1435	14266	18	0.069862	-37.437044	0	20	0.121497	1150.022995	-43.344091	3221	3007	-3.08233	649.977005	649.977	14	-0.557267	1.59409648174245e-07	-1.84806	1.65033971074049e-13
3914000	3916000	AT3G12280	NA	Chr3	3913411	3919170	0.731778	0.635369	3902000	3904000	AT3G12240	Chr3	3902435	3904918	0.663189	0.717131	NA	2102.309084	interaction184778	3-3914000	+	2044	3-3902000	+	1971	11576	25	0.083078	-59.105338	0	25	0.120547	1448.855054	-59.054256	3113	3087	-3.07928	653.45403	653.454	22	0.567311	1.84001532295447e-05	-5.52145	1.72861517687458e-21
12674000	12676000	AT2G29650	yes	Chr2	12673382	12676049	0.827699	0.662433	12668000	12670000	AT2G29630	Chr2	12666934	12670311	0.7643	0.749649	NA	6900	interaction146840	2-12674000	+	1171	2-12668000	+	2256	6268	69	0.069862	-229.162147	0	55	0.069862	5500	-170.237117	1562	3066	-3.06707	1400	1400	84	5.05488	4.10718409300393e-138	3.53512	3.93327578176328e-100
4006000	4008000	AT5G12370	NA	Chr5	4002774	4008804	1.09005	0.989963	3976000	3978000	AT5G12290	Chr5	3974170	3978160	0.804557	0.786955	NA	782.718218	interaction333701	5-4006000	+	2972	5-3976000	+	1602	30602	11	0.098181	-18.44433	7.4e-05	11	0.178247	431.133549	-18.430842	4665	3046	-3.06406	351.584669	351.585	6	0.480932	2.20074806251269e-06	-0.488363	4.53506404809942e-06
17618000	17620000	AT3G47770	yes	Chr3	17618054	17622678	2.14665	2.9787	17584000	17586000	AT3G47700	Chr3	17583600	17586624	0.713312	0.726384	NA	835.003205	interaction234797	3-17618000	+	2123	3-17584000	+	1720	33261	9	0.0753	-13.714081	0.007132	7	0.114543	426.941895	-9.399603	3468	2633	-3.06202	408.06131	408.061	4	-4.89837	6.97538308638675e-07	-0.48506	0.000406349121079177
7430000	7432000	AT2G17070	yes	Chr2	7430862	7431654	1.69628	2.27182	7410000	7412000	AT2G17050	Chr2	7410834	7415610	1.22574	1.35067	yes	2700	interaction128846	2-7430000	+	2302	2-7410000	+	1195	19832	27	0.069862	-65.795758	0	23	0.084732	1896.372048	-52.682592	3441	1963	-3.0616	803.627952	803.628	24	-4.88323	1.07405052041308e-12	-3.20113	7.70293225548829e-19
28216000	28218000	AT1G75180	NA	Chr1	28215835	28218801	0.639754	0.768441	28210000	28212000	AT1G75160	Chr1	28209436	28211804	2.36058	2.11175	yes	2200	interaction95341	1-28216000	+	1036	1-28210000	+	670	6109	22	0.069862	-49.744649	0	14	0.069862	1400	-26.189926	1546	1169	-3.06019	800	800	18	1.83352	1.74429948097138e-72	-3.40784	0.000344258193231192
8932000	8934000	AT1G25440	yes	Chr1	8933715	8935460	0.95422	2.81536	8922000	8924000	AT1G25425	Chr1	8922699	8923331	1.9258	2.24718	yes	2200	interaction31253	1-8932000	+	1252	1-8922000	+	812	9850	22	0.069862	-49.688522	0	14	0.069862	1400	-26.186674	1627	1228	-3.05913	800	800	18	5.35824	5.15291051260937e-100	3.35654	3.05526939718009e-36
18852000	18854000	AT5G46490	yes	Chr5	18850775	18853843	0.842107	1.14427	18848000	18850000	AT5G46470	Chr5	18842700	18849741	0.82341	0.673445	NA	7000	interaction384614	5-18852000	+	1138	5-18848000	+	1231	3333	70	0.069862	-233.531344	0	56	0.069862	5600	-174.536264	1256	1484	-3.05497	1400	1400	86	4.23768	5.82437180675689e-44	0.726949	0.00168750164222977
3078000	3080000	AT1G09530	yes	Chr1	3076581	3079539	0.998111	0.794292	3072000	3074000	AT1G09520	Chr1	3070945	3072050	0.760529	0.940814	NA	1700	interaction10991	1-3078000	+	830	1-3072000	+	366	6127	17	0.069862	-34.782817	0	10	0.069862	1000	-16.07728	1496	544	-3.05466	700	700	12	3.53192	1.98167959223334e-29	0.383578	0.00904692668265399
2462000	2464000	AT4G04870	NA	Chr4	2461673	2464143	0.643027	0.77319	2458000	2460000	AT4G04860	Chr4	2459879	2461739	0.633596	0.67563	NA	900	interaction264393	4-2462000	+	1402	4-2458000	+	73	4214	9	0.069862	-14.10596	0.005157	4	0.069862	400	-3.998956	2342	94	-3.05172	500	500	4	-0.367807	0.0295481583482395	-0.785829	1.80873621330016e-05
18852000	18854000	AT5G46490	yes	Chr5	18850775	18853843	0.842107	1.14427	18846000	18848000	AT5G46470	Chr5	18842700	18849741	0.82341	0.673445	NA	5100	interaction384613	5-18852000	+	1138	5-18846000	+	1215	5297	51	0.069862	-154.483985	0	39	0.069862	3900	-108.172659	1256	1486	-3.0387	1200	1200	56	4.23768	5.82437180675689e-44	0.726949	0.00168750164222977
14206000	14208000	AT4G28760	NA	Chr4	14207459	14212050	0.766131	0.702769	14198000	14200000	AT4G28730	Chr4	14199095	14200901	0.90508	0.846914	yes	1700	interaction305707	4-14206000	+	730	4-14198000	+	983	7476	17	0.069862	-34.614484	0	10	0.069862	1000	-16.045134	1037	1638	-3.03861	700	700	12	1.37331	2.15720315102243e-33	1.76609	4.08848384258024e-36
3472000	3474000	AT5G10980	yes	Chr5	3472404	3473466	0.665542	0.94607	3464000	3466000	AT5G10960	Chr5	3464217	3465687	0.855097	0.923853	NA	1700	interaction331867	5-3472000	+	967	5-3464000	+	656	7897	17	0.069862	-34.633433	0	10	0.069862	1000	-16.041441	1586	1158	-3.03677	700	700	12	-0.418099	0.00238731247886676	-0.613289	0.0395703499109788
17380000	17382000	AT5G43310	NA	Chr5	17379485	17385535	0.860915	0.826556	17360000	17362000	AT5G43270	Chr5	17360286	17363773	0.739552	0.706486	NA	1700	interaction379756	5-17380000	+	1096	5-17360000	+	1072	19628	17	0.069862	-34.561093	0	10	0.069862	1000	-16.033834	1525	1588	-3.03301	700	700	12	0.770696	0.000300566112449552	1.3807	6.03500575113573e-23
9524000	9526000	AT4G16920	yes	Chr4	9519172	9525691	0.589329	0.647513	9508000	9510000	AT4G16892	Chr4	9506321	9508337	0.577603	0.599978	NA	1700	interaction289192	4-9524000	+	1097	4-9508000	+	2355	16034	17	0.069862	-34.558504	0	10	0.069862	1000	-16.032152	1640	2873	-3.03218	700	700	12	-2.32573	3.066915643526e-14	2.88438	6.73194512868525e-12
10716000	10718000	AT2G25170	NA	Chr2	10713806	10723986	0.814607	0.731178	10698000	10700000	AT2G25140	Chr2	10697702	10702152	0.686317	0.716852	yes	1700	interaction140110	2-10716000	+	1200	2-10698000	+	2026	18089	17	0.069862	-34.548978	0	10	0.069862	1000	-16.030907	1737	3093	-3.03157	700	700	12	0.509542	0.00905829422291053	-0.888456	5.7815581793991e-16
4950000	4952000	AT1G14460	NA	Chr1	4948747	4952927	0.685513	0.638557	4934000	4936000	AT1G14430	Chr1	4934119	4936100	0.550087	0.999012	yes	1700	interaction17302	1-4950000	+	1250	1-4934000	+	1136	15834	17	0.069862	-34.554693	0	10	0.069862	1000	-16.030527	2169	1769	-3.03138	700	700	12	0.823663	0.00326889877888627	3.63616	2.93322926134621e-34
9828000	9830000	AT3G26740	NA	Chr3	9827800	9828680	0.89424	0.905275	9824000	9826000	AT3G26730	Chr3	9823684	9827438	0.802673	0.768079	NA	5200	interaction205340	3-9828000	+	608	3-9824000	+	1345	3672	52	0.069862	-159.503882	0	40	0.069862	4000	-112.212412	823	2165	-3.03049	1200	1200	58	4.79757	5.88055100244859e-29	0.464858	1.93779968904715e-05
1710000	1712000	AT1G05700	NA	Chr1	1709795	1713245	0.575813	0.644737	1688000	1690000	AT1G05640	Chr1	1687435	1689501	0.497483	0.63219	NA	1200	interaction5860	1-1710000	+	1735	1-1688000	+	1473	22126	12	0.069862	-20.945389	7e-06	10	0.101413	688.88838	-16.023637	3045	2655	-3.0089	511.11162	511.112	6	-3.98389	3.82032212564445e-30	-0.852887	8.72933397216592e-06
12764000	12766000	AT2G29940	yes	Chr2	12760138	12766623	1.10414	1.20105	12744000	12746000	AT2G29890	Chr2	12744149	12749596	0.653788	0.661485	NA	2200	interaction147347	2-12764000	+	2460	2-12744000	+	1291	19655	22	0.069862	-49.590826	0	19	0.089174	1488.533447	-40.368219	3670	1937	-3.00795	711.466553	711.467	18	5.6035	1.67481282677257e-69	0.527832	0.0289226347822074
19976000	19978000	AT5G49280	yes	Chr5	19976593	19977449	1.06473	0.90764	19972000	19974000	AT5G49270	Chr5	19971908	19974444	2.20091	2.41651	yes	2900	interaction388247	5-19976000	+	410	5-19972000	+	1651	4036	29	0.069862	-73.169955	0	20	0.069862	2000	-43.549565	660	2840	-3.00034	900	900	26	-2.01344	8.42688624929714e-19	-5.69228	1.26009629022159e-77
19272000	19274000	AT1G51880	yes	Chr1	19270192	19274068	2.15673	2.95586	19216000	19218000	AT1G51800	Chr1	19214147	19217970	0.895504	1.10386	yes	1346.771238	interaction64859	1-19272000	+	2182	1-19216000	+	1614	56054	14	0.072623	-26.171287	0	10	0.08601	812.25757	-16.02815	3430	1999	-2.9984	534.513669	534.514	8	-5.75359	8.00641733934526e-38	-1.22176	0.000697390718735551
15418000	15420000	AT2G36780	yes	Chr2	15417489	15419154	1.77859	2.27624	15408000	15410000	AT2G36740	Chr2	15406689	15409835	0.791585	0.819745	NA	900	interaction156624	2-15418000	+	2270	2-15408000	+	246	10299	9	0.069862	-13.81457	0.006864	4	0.069862	400	-3.97241	2806	383	-2.99179	500	500	4	4.16888	6.8181541951568e-15	0.552313	0.0327706815212257
13192000	13194000	AT4G25990	yes	Chr4	13191689	13193543	1.06292	1.22479	13180000	13182000	AT4G25960	Chr4	13177408	13183631	0.897734	1.03828	yes	900	interaction301861	4-13192000	+	306	4-13180000	+	1768	12311	9	0.069862	-13.79136	0.006998	4	0.069862	400	-3.972049	400	2622	-2.99099	500	500	4	7.41703	8.38840946427488e-93	4.96418	8.69686277185249e-89
11250000	11252000	AT3G29310	yes	Chr3	11249651	11251820	0.744804	0.837618	11238000	11240000	AT3G29290	Chr3	11238110	11240287	0.723094	0.60081	NA	900	interaction209765	3-11250000	+	1226	3-11238000	+	321	12873	9	0.069862	-13.786928	0.007022	4	0.069862	400	-3.969766	1720	556	-2.98599	500	500	4	-0.550188	1.02771149541525e-06	2.71411	1.40163767163686e-58
8872000	8874000	AT4G15540	NA	Chr4	8873354	8875344	0.76876	0.672715	8856000	8858000	AT4G15500	Chr4	8856987	8858572	1.25271	1.39548	yes	900	interaction286869	4-8872000	+	497	4-8856000	+	1318	15920	9	0.069862	-13.755053	0.007131	4	0.069862	400	-3.968338	736	2136	-2.98287	500	500	4	1.67266	2.6692074718923e-35	-1.96172	5.00222497010575e-24
10734000	10736000	AT1G30400	NA	Chr1	10727637	10738055	0.804175	0.732431	10716000	10718000	AT1G30360	Chr1	10715664	10718997	0.855337	0.899895	NA	900	interaction37605	1-10734000	+	1621	1-10716000	+	471	18501	9	0.069862	-13.758251	0.007129	4	0.069862	400	-3.968073	2615	783	-2.98229	500	500	4	-1.09065	2.30060163399772e-25	0.516831	3.2134727311483e-05
27188000	27190000	AT1G72230	yes	Chr1	27188065	27189244	2.65862	1.98043	27170000	27172000	AT1G72200	Chr1	27169794	27171321	1.7092	1.86159	yes	900	interaction91533	1-27188000	+	427	1-27170000	+	1224	17908	9	0.069862	-13.764557	0.007115	4	0.069862	400	-3.967872	823	2180	-2.98185	500	500	4	-2.00048	1.62911767939812e-08	-3.78158	4.71779580767948e-29
17848000	17850000	AT2G42890	NA	Chr2	17849818	17854553	0.706747	0.712346	17836000	17838000	AT2G42870	Chr2	17836415	17837250	1.02206	1.7936	yes	900	interaction165217	2-17848000	+	524	2-17836000	+	634	11203	9	0.069862	-13.75207	0.007132	4	0.069862	400	-3.967797	839	881	-2.98169	500	500	4	-0.9197	1.55972648369919e-08	3.22955	6.22794594983233e-46
9524000	9526000	AT4G16920	yes	Chr4	9519172	9525691	0.589329	0.647513	9504000	9506000	AT4G16890	Chr4	9500505	9505455	0.596102	0.578236	NA	900	interaction289190	4-9524000	+	1097	4-9504000	+	854	20497	9	0.069862	-13.730916	0.007132	4	0.069862	400	-3.967588	1640	887	-2.98123	500	500	4	-2.32573	3.066915643526e-14	2.55938	2.02741479868906e-44
9538000	9540000	AT4G16950	NA	Chr4	9538797	9544467	0.398034	0.329196	9504000	9506000	AT4G16890	Chr4	9500505	9505455	0.596102	0.578236	NA	900	interaction289267	4-9538000	+	1361	4-9504000	+	854	34115	9	0.069862	-13.730916	0.007132	4	0.069862	400	-3.967588	1561	887	-2.98123	500	500	4	2.61975	7.22284784353196e-50	2.55938	2.02741479868906e-44
2142000	2144000	AT3G06780	NA	Chr3	2143487	2144521	0.524582	0.673617	2128000	2130000	AT3G06750	Chr3	2129622	2130315	0.58916	0.69966	NA	900	interaction178294	3-2142000	+	597	3-2128000	+	557	14313	9	0.069862	-13.74882	0.007132	4	0.069862	400	-3.967487	1048	912	-2.98102	500	500	4	1.48767	2.06789017838481e-11	2.39604	2.45514712667275e-103
6570000	6572000	AT3G19040	NA	Chr3	6567156	6575282	0.670676	0.59283	6552000	6554000	AT3G19000	Chr3	6553528	6555147	1.11219	1.58006	NA	900	interaction194169	3-6570000	+	1464	3-6552000	+	548	17309	9	0.069862	-13.749667	0.007132	4	0.069862	400	-3.967371	2539	943	-2.98076	500	500	4	2.59765	6.52522389118756e-07	1.38328	7.16828559248118e-25
21926000	21928000	AT5G54030	yes	Chr5	21925983	21927243	1.49888	1.85952	21922000	21924000	AT5G54020	Chr5	21921863	21923534	2.05313	2.0504	yes	8500	interaction394845	5-21926000	+	1176	5-21922000	+	2258	3878	85	0.069862	-299.795017	0	133	0.131076	7088.753302	-525.504235	2363	4422	-2.98053	1411.246698	1411.25	112	-5.4025	8.84079868946656e-15	-4.88759	4.8366299666038e-19
8870000	8872000	AT4G15530	NA	Chr4	8864827	8870967	0.773127	0.758507	8858000	8860000	AT4G15500	Chr4	8856987	8858572	1.25271	1.39548	yes	900	interaction286863	4-8870000	+	681	4-8858000	+	881	11766	9	0.069862	-13.739436	0.007132	4	0.069862	400	-3.967227	984	1502	-2.98045	500	500	4	2.46844	2.06049950208947e-24	-1.96172	5.00222497010575e-24
7244000	7246000	AT5G21930	NA	Chr5	7243001	7249170	0.808737	0.74113	7212000	7214000	AT5G21222	Chr5	7208642	7213894	0.786167	0.630853	NA	900	interaction345165	5-7244000	+	613	5-7212000	+	1624	32179	9	0.069862	-13.744109	0.007132	4	0.069862	400	-3.966907	1090	2347	-2.97975	500	500	4	3.29193	1.39558739053898e-223	3.79446	6.5736554884482e-225
15618000	15620000	AT4G32350	NA	Chr4	15617465	15620910	0.708448	0.795396	15600000	15602000	AT4G32300	Chr4	15599474	15602595	0.690725	0.627971	NA	900	interaction310368	4-15618000	+	770	4-15600000	+	1442	18269	9	0.069862	-13.734572	0.007132	4	0.069862	400	-3.966894	1095	2473	-2.97972	500	500	4	0.418908	0.0101094156876388	0.828702	0.0121342890309324
9594000	9596000	AT3G26210	yes	Chr3	9593131	9595243	0.982207	1.1727	9574000	9576000	AT3G26170	Chr3	9573359	9575148	0.841362	1.11068	yes	900	interaction204488	3-9594000	+	936	3-9574000	+	919	20624	9	0.069862	-13.728547	0.007132	4	0.069862	400	-3.966861	1500	1107	-2.97965	500	500	4	-1.02567	0.0428136604927927	4.47378	9.48590030271745e-31
17134000	17136000	AT3G46540	NA	Chr3	17134090	17135587	0.732685	1.18202	17118000	17120000	AT3G46490	Chr3	17115628	17119451	1.13782	1.20209	yes	900	interaction233167	3-17134000	+	1042	3-17118000	+	1520	16110	9	0.069862	-13.724875	0.007132	4	0.069862	400	-3.966747	1152	2533	-2.9794	500	500	4	2.06563	1.49190453383537e-55	2.86735	8.21037109695304e-35
6154000	6156000	AT4G09770	yes	Chr4	6154258	6155912	0.968506	1.03147	6134000	6136000	AT4G09720	Chr4	6132836	6135200	0.828759	0.746882	NA	900	interaction277792	4-6154000	+	667	4-6134000	+	1532	19882	9	0.069862	-13.74032	0.007132	4	0.069862	400	-3.966706	1169	2287	-2.97932	500	500	4	-5.50785	1.11449315150129e-22	0.349855	5.86795214749919e-05
6406000	6408000	AT4G10330	NA	Chr4	6406540	6407777	0.768854	0.705793	6384000	6386000	AT4G10300	Chr4	6384461	6386189	0.833397	1.15615	NA	900	interaction278608	4-6406000	+	1098	4-6384000	+	779	22145	9	0.069862	-13.734143	0.007132	4	0.069862	400	-3.966529	1579	1249	-2.97893	500	500	4	0.393418	0.0175821838535251	3.22691	2.36928116808532e-80
7404000	7406000	AT1G21140	yes	Chr1	7404382	7405281	4.10112	3.64629	7376000	7378000	AT1G21070	Chr1	7375868	7378147	0.781642	0.739242	NA	900	interaction25927	1-7404000	+	1165	1-7376000	+	719	27748	9	0.069862	-13.737211	0.007132	4	0.069862	400	-3.966427	2254	1300	-2.97871	500	500	4	-2.31744	2.16162989380301e-07	0.642836	0.0031727895830048
7790000	7792000	AT1G22070	NA	Chr1	7789347	7792114	0.761009	0.752931	7768000	7770000	AT1G22040	Chr1	7767923	7770055	0.790515	0.748621	NA	900	interaction27331	1-7790000	+	806	1-7768000	+	1312	22069	9	0.069862	-13.732911	0.007132	4	0.069862	400	-3.966326	1355	2121	-2.97849	500	500	4	-0.876942	8.63487938891017e-12	-0.752781	0.00154767409661633
12468000	12470000	AT2G29020	yes	Chr2	12469723	12471700	0.84475	0.920633	12440000	12442000	AT2G28960	Chr2	12437913	12442347	3.14401	3.61957	yes	900	interaction145853	2-12468000	+	730	2-12440000	+	1079	28495	9	0.069862	-13.736611	0.007132	4	0.069862	400	-3.966319	1359	1855	-2.97847	500	500	4	-0.45754	0.0116922241058098	-5.37377	2.41102155837694e-45
22310000	22312000	AT3G60350	NA	Chr3	22306487	22311186	0.742066	0.627159	22294000	22296000	AT3G60320	Chr3	22291885	22295371	0.737782	0.713397	NA	900	interaction251417	3-22310000	+	859	3-22294000	+	1236	15495	9	0.069862	-13.730721	0.007132	4	0.069862	400	-3.966182	1442	1837	-2.97817	500	500	4	0.4828	4.73010958812252e-05	1.7249	1.36760241993734e-39
1196000	1198000	AT4G02710	NA	Chr4	1193515	1197630	0.615688	0.729121	1160000	1162000	AT4G02660	Chr4	1159666	1174321	0.729888	0.708662	yes	900	interaction259114	4-1196000	+	993	4-1160000	+	2591	35603	9	0.069862	-13.726228	0.007132	4	0.069862	400	-3.96615	1463	3500	-2.9781	500	500	4	-1.90022	8.09204782836348e-13	-1.45544	0.00144841635090342
466000	468000	AT4G01080	NA	Chr4	466390	468294	0.721391	0.776881	442000	444000	AT4G01020	Chr4	439085	445168	0.451374	0.413089	NA	900	interaction256741	4-466000	+	934	4-442000	+	1474	23988	9	0.069862	-13.728047	0.007132	4	0.069862	400	-3.966141	1469	2032	-2.97809	500	500	4	2.11891	1.19390457164954e-09	0.410132	0.000179935638804866
5206000	5208000	AT1G15130	NA	Chr1	5206001	5209915	0.778046	0.74028	5184000	5186000	AT1G15060	Chr1	5183606	5186974	0.694971	0.706189	NA	900	interaction18081	1-5206000	+	1276	1-5184000	+	820	21327	9	0.069862	-13.732305	0.007132	4	0.069862	400	-3.966012	2236	1560	-2.97781	500	500	4	-0.341582	0.00155360787686825	0.823155	8.86623902367572e-12
8032000	8034000	AT1G22710	yes	Chr1	8030640	8033117	1.40317	1.46319	8014000	8016000	AT1G22650	Chr1	8013381	8015991	0.993159	1.19888	yes	900	interaction28097	1-8032000	+	962	1-8014000	+	1700	17483	9	0.069862	-13.727156	0.007132	4	0.069862	400	-3.965996	1572	2299	-2.97777	500	500	4	1.23768	0.000442347826869566	3.34537	1.66549962186293e-84
25838000	25840000	AT1G68790	NA	Chr1	25834708	25839319	0.78929	0.745774	25832000	25834000	AT1G68780	Chr1	25831802	25833844	0.733651	0.838658	NA	5300	interaction87331	1-25838000	+	577	1-25832000	+	1371	5570	53	0.069862	-163.687212	0	41	0.069862	4100	-115.803493	998	1959	-2.97765	1200	1200	60	0.268	0.0151746434043371	7.49873	9.08371591726231e-73
19258000	19260000	AT1G51860	yes	Chr1	19257633	19261479	1.06514	1.24629	19214000	19216000	AT1G51800	Chr1	19214147	19217970	0.895504	1.10386	yes	900	interaction64746	1-19258000	+	1046	1-19214000	+	1115	44135	9	0.069862	-13.72477	0.007132	4	0.069862	400	-3.965925	1628	1654	-2.97762	500	500	4	-3.94709	1.17390857614013e-46	-1.22176	0.000697390718735551
8360000	8362000	AT3G23370	yes	Chr3	8357584	8360865	0.65343	0.659796	8334000	8336000	AT3G23300	Chr3	8333024	8336146	0.744807	0.743103	NA	900	interaction200540	3-8360000	+	1204	3-8334000	+	1002	25565	9	0.069862	-13.72597	0.007132	4	0.069862	400	-3.965897	1856	1652	-2.97756	500	500	4	-0.681151	0.03768475411554	-0.44348	0.000242491938358738
4806000	4808000	AT1G14030	yes	Chr1	4805305	4807517	0.711527	0.608517	4776000	4778000	AT1G13960	Chr1	4776462	4779400	0.703787	0.691654	NA	900	interaction16812	1-4806000	+	1255	1-4776000	+	859	29390	9	0.069862	-13.730721	0.007132	4	0.069862	400	-3.965889	2209	1658	-2.97754	500	500	4	3.49445	3.78234974311733e-137	-0.630401	4.46936159604711e-09
854000	856000	AT3G03560	NA	Chr3	852909	856486	0.898942	0.802372	832000	834000	AT3G03500	Chr3	832928	834350	0.587182	0.611082	NA	900	interaction174018	3-854000	+	927	3-832000	+	1562	21314	9	0.069862	-13.728278	0.007132	4	0.069862	400	-3.965859	1684	2532	-2.97747	500	500	4	-0.710446	3.22748036171354e-05	-5.74972	1.80220306325919e-35
12496000	12498000	AT2G29090	yes	Chr2	12494850	12499723	1.91476	3.36225	12444000	12446000	AT2G28970	Chr2	12443918	12448163	2.60862	3.17103	yes	900	interaction146022	2-12496000	+	1318	2-12444000	+	1366	52162	9	0.069862	-13.719137	0.007132	4	0.069862	400	-3.965837	1704	2244	-2.97743	500	500	4	5.60489	3.66061741036352e-23	-5.31659	4.18982468697422e-130
21588000	21590000	AT5G53210	yes	Chr5	21586605	21588941	3.42576	4.15927	21554000	21556000	AT5G53150	Chr5	21554790	21557491	0.714165	0.594957	NA	900	interaction393736	5-21588000	+	1236	5-21554000	+	983	34346	9	0.069862	-13.726521	0.007132	4	0.069862	400	-3.965754	1876	1782	-2.97724	500	500	4	6.40716	1.19038335590775e-53	0.492376	9.27599689683393e-05
23036000	23038000	AT1G62310	NA	Chr1	23036038	23039609	0.884021	0.70705	22998000	23000000	AT1G62260	Chr1	22997825	22999796	0.743904	0.732678	yes	900	interaction77365	1-23036000	+	1098	1-22998000	+	1478	38565	9	0.069862	-13.723477	0.007132	4	0.069862	400	-3.965721	1815	2878	-2.97717	500	500	4	0.531839	4.4539099644249e-05	-0.578347	0.00600262599986917
24980000	24982000	AT1G66950	yes	Chr1	24978204	24984619	1.66084	2.15792	24962000	24964000	AT1G66910	Chr1	24961633	24963946	0.832049	1.58514	yes	900	interaction84269	1-24980000	+	1461	1-24962000	+	1603	17700	9	0.069862	-13.717019	0.007132	4	0.069862	400	-3.965718	1818	1981	-2.97717	500	500	4	-5.02397	7.42142954142439e-14	5.73694	4.28099263781876e-86
8554000	8556000	AT4G14970	NA	Chr4	8553642	8561664	0.566072	0.587731	8522000	8524000	AT4G14900	Chr4	8521521	8523705	0.638048	0.587879	NA	900	interaction285640	4-8554000	+	1773	4-8522000	+	1133	32135	9	0.069862	-13.722673	0.007132	4	0.069862	400	-3.965583	2550	1967	-2.97687	500	500	4	0.873577	0.0126144663728256	-0.308519	0.0178454190074613
10476000	10478000	AT2G24640	NA	Chr2	10475209	10479454	0.813963	0.72104	10418000	10420000	AT2G24520	Chr2	10415431	10419783	0.761413	0.847934	yes	900	interaction139272	2-10476000	+	1442	2-10418000	+	1276	57680	9	0.069862	-13.71985	0.007132	4	0.069862	400	-3.965454	2393	2134	-2.9766	500	500	4	-0.456191	0.0187102957773522	1.33383	3.49370715869399e-20
19062000	19064000	AT2G46440	NA	Chr2	19061860	19064881	0.432464	0.53993	19056000	19058000	AT2G46420	Chr2	19053685	19057096	0.760918	0.748896	NA	3600	interaction169000	2-19062000	+	1104	2-19056000	+	857	6639	36	0.069862	-97.397491	0	26	0.069862	2600	-62.454107	1712	1315	-2.97443	1000	1000	36	6.00871	3.72912533608907e-39	2.03138	1.34619139768214e-07
25254000	25256000	AT1G67420	NA	Chr1	25255231	25260430	0.642532	0.665573	25248000	25250000	AT1G67400	Chr1	25247987	25250734	0.714981	0.853938	NA	2900	interaction85393	1-25254000	+	755	1-25248000	+	1093	6006	29	0.069862	-72.731326	0	20	0.069862	2000	-43.419861	1297	1595	-2.97386	900	900	26	-1.00395	1.69600718688732e-15	2.80221	7.00138421226531e-27
10642000	10644000	AT4G19520	yes	Chr4	10639268	10647079	1.45125	3.11146	10636000	10638000	AT4G19510	Chr4	10633684	10639001	0.809883	0.81802	yes	9600	interaction292827	4-10642000	+	1586	4-10636000	+	1904	6032	96	0.069862	-349.244105	0	80	0.069862	8000	-276.5152	1689	2407	-2.9721	1600	1600	130	3.09599	1.18530466429375e-17	1.17714	1.10960855781786e-18
12506000	12508000	AT2G29110	yes	Chr2	12506879	12510552	2.10031	2.2937	12492000	12494000	AT2G29080	Chr2	12489626	12493285	0.792998	0.770604	yes	2300	interaction146117	2-12506000	+	1601	2-12492000	+	644	14093	23	0.069862	-52.928224	0	15	0.069862	1500	-28.921122	2241	1067	-2.95953	800	800	18	-2.08381	0.0123179555707828	0.130048	0.0487208051651598
7766000	7768000	AT1G22040	NA	Chr1	7767923	7770055	0.790515	0.748621	7760000	7762000	AT1G22030	Chr1	7759163	7760556	0.665531	0.73026	yes	1300	interaction27251	1-7766000	+	242	1-7760000	+	644	5928	13	0.069862	-23.758499	0	7	0.069862	700	-9.429605	431	1019	-2.95891	600	600	8	-0.752781	0.00154767409661633	-1.89811	4.39694508573441e-08
6370000	6372000	AT3G18524	NA	Chr3	6368009	6372568	0.612146	0.548666	6356000	6358000	AT3G18510	Chr3	6355663	6356153	0.736885	1.20246	yes	2300	interaction193459	3-6370000	+	1685	3-6356000	+	758	13524	23	0.069862	-52.872874	0	15	0.069862	1500	-28.908398	2687	1251	-2.95595	800	800	18	0.510268	0.0192628674251409	-0.569573	0.0169688630062208
9514000	9516000	AT4G16900	NA	Chr4	9511858	9516541	0.627999	0.562104	9502000	9504000	AT4G16890	Chr4	9500505	9505455	0.596102	0.578236	NA	2300	interaction289151	4-9514000	+	1554	4-9502000	+	1125	12229	23	0.069862	-52.771435	0	15	0.069862	1500	-28.907871	1841	1260	-2.9558	800	800	18	1.16585	7.73801154939317e-22	2.55938	2.02741479868906e-44
4980000	4982000	AT5G15330	NA	Chr5	4980487	4982231	0.725383	0.677813	4974000	4976000	AT5G15310	Chr5	4974670	4976227	1.58987	1.96804	yes	2300	interaction337031	5-4980000	+	877	5-4974000	+	1327	5644	23	0.069862	-52.830593	0	15	0.069862	1500	-28.895121	1526	2049	-2.95222	800	800	18	0.391504	0.00302667941951365	6.57638	3.23093143112171e-205
25300000	25302000	AT1G67510	yes	Chr1	25297476	25300184	0.64575	0.723436	25294000	25296000	AT1G67500	Chr1	25287706	25296937	0.642623	0.628914	NA	1300	interaction85572	1-25300000	+	398	1-25294000	+	990	5774	13	0.069862	-23.647372	1e-06	7	0.069862	700	-9.420823	570	1527	-2.95198	600	600	8	-0.667581	0.00881669948340081	-1.03578	5.81599355284701e-06
4898000	4900000	AT3G14570	yes	Chr3	4892642	4902628	0.809788	0.622274	4858000	4860000	AT3G14470	Chr3	4857939	4861247	0.574444	0.680765	NA	984.258492	interaction188308	3-4898000	+	1804	3-4858000	+	1908	40017	10	0.070979	-16.030126	0.000763	9	0.117355	535.77232	-13.707504	2854	3278	-2.9516	448.486171	448.486	6	-1.40591	1.01429426335341e-06	-1.45157	3.44124558141978e-12
9548000	9550000	AT4G16960	NA	Chr4	9546342	9551007	0.400495	0.414563	9538000	9540000	AT4G16950	Chr4	9538797	9544467	0.398034	0.329196	NA	1300	interaction289318	4-9548000	+	526	4-9538000	+	1361	9726	13	0.069862	-23.605882	1e-06	7	0.069862	700	-9.413564	778	1561	-2.94628	600	600	8	-1.53638	0.000183322470094043	2.61975	7.22284784353196e-50
10600000	10602000	AT4G19440	NA	Chr4	10600787	10604520	0.827817	0.739368	10584000	10586000	AT4G19410	Chr4	10580892	10585861	0.809462	0.779006	NA	1300	interaction292687	4-10600000	+	1190	4-10584000	+	576	15950	13	0.069862	-23.594726	1e-06	7	0.069862	700	-9.413412	1800	784	-2.94616	600	600	8	-0.4895	0.0182963921659322	0.470756	2.83772585178351e-05
5936000	5938000	AT2G14100	yes	Chr2	5934555	5936371	0.819486	0.860895	5924000	5926000	AT2G14080	Chr2	5925185	5929600	0.966447	1.85291	yes	1300	interaction123067	2-5936000	+	1062	2-5924000	+	889	11798	13	0.069862	-23.553561	1e-06	7	0.069862	700	-9.409783	1743	961	-2.94333	600	600	8	-5.36289	2.21524302186654e-31	4.35706	6.58755995903743e-183
16746000	16748000	AT3G45620	NA	Chr3	16745881	16748156	0.824829	0.690212	16734000	16736000	AT3G45600	Chr3	16733754	16735951	0.996972	0.990071	yes	1300	interaction231467	3-16746000	+	1526	3-16734000	+	550	12259	13	0.069862	-23.600272	1e-06	7	0.069862	700	-9.409035	2496	1008	-2.94274	600	600	8	-1.03542	2.88225863824342e-13	-1.11352	0.000317429601598576
7888000	7890000	AT4G13572	yes	Chr4	7887439	7888638	2.87774	4.22991	7874000	7876000	AT4G13550	Chr4	7871056	7876963	0.778294	0.695654	NA	1300	interaction283269	4-7888000	+	1206	4-7874000	+	764	13421	13	0.069862	-23.56593	1e-06	7	0.069862	700	-9.408722	1550	1029	-2.9425	600	600	8	7.74895	3.2528133396824e-43	1.99135	8.05319993806548e-47
25000000	25002000	AT5G62230	NA	Chr5	24996128	25002340	0.650618	0.653096	24988000	24990000	AT5G62220	Chr5	24988455	24990009	0.541612	0.753915	NA	1300	interaction404949	5-25000000	+	1704	5-24988000	+	696	11516	13	0.069862	-23.574537	1e-06	7	0.069862	700	-9.406072	2222	1250	-2.94043	600	600	8	6.04763	9.67841458169798e-40	0.95387	6.03278426519507e-05
23164000	23166000	AT3G62630	yes	Chr3	23163746	23165195	0.65041	0.95793	23148000	23150000	AT3G62590	Chr3	23147917	23150352	0.647769	0.594146	NA	1300	interaction253973	3-23164000	+	860	3-23148000	+	1888	16029	13	0.069862	-23.556108	1e-06	7	0.069862	700	-9.405709	1288	3000	-2.94015	600	600	8	1.47807	1.59575123112932e-11	-1.15123	0.0187735361684051
16062000	16064000	AT4G33330	yes	Chr4	16059753	16063070	2.1475	2.20748	16044000	16046000	AT4G33270	Chr4	16044351	16046792	0.395653	0.388945	NA	1300	interaction311904	4-16062000	+	898	4-16044000	+	743	17765	13	0.069862	-23.568418	1e-06	7	0.069862	700	-9.405553	1787	1305	-2.94003	600	600	8	-2.48724	5.25679695764001e-12	0.995384	0.0017977692054308
15924000	15926000	AT4G33000	NA	Chr4	15924348	15926628	0.707703	0.673437	15908000	15910000	AT4G32960	Chr4	15908617	15910180	0.794611	0.868998	NA	1300	interaction311401	4-15924000	+	1170	4-15908000	+	980	16110	13	0.069862	-23.546551	1e-06	7	0.069862	700	-9.403322	1609	1687	-2.93829	600	600	8	4.05383	6.52191800702759e-101	0.500036	0.000314482909142837
12168000	12170000	AT1G33560	yes	Chr1	12168767	12172005	1.02221	0.856991	12154000	12156000	AT1G33500	Chr1	12152572	12154715	0.7245	0.767203	NA	1300	interaction42287	1-12168000	+	1044	1-12154000	+	1075	14837	13	0.069862	-23.542357	1e-06	7	0.069862	700	-9.402752	1875	1711	-2.93785	600	600	8	-0.96305	8.42610349465416e-05	-2.81317	4.43925864684576e-05
12860000	12862000	AT4G25020	yes	Chr4	12860633	12861975	2.35191	3.66948	12834000	12836000	AT4G24970	Chr4	12831008	12835449	0.754382	0.690088	NA	1300	interaction300687	4-12860000	+	1101	4-12834000	+	1295	26149	13	0.069862	-23.539033	1e-06	7	0.069862	700	-9.402185	1826	2223	-2.93741	600	600	8	2.10923	7.19004318946972e-07	0.630069	0.00317507275558084
21322000	21324000	AT1G57570	yes	Chr1	21320937	21324637	2.6393	3.45178	21264000	21266000	AT1G56720	Chr1	21263419	21266368	0.79972	0.726571	NA	1300	interaction71522	1-21322000	+	1472	1-21264000	+	1474	58453	13	0.069862	-23.523712	1e-06	7	0.069862	700	-9.401836	2177	1905	-2.93714	600	600	8	-4.89304	3.36847505939349e-27	1.30607	1.44983835802332e-49
7426000	7428000	AT5G22410	yes	Chr5	7426313	7427964	1.34515	1.74772	7402000	7404000	AT5G22355	Chr5	7401706	7403825	1.32679	1.69675	yes	1700	interaction345682	5-7426000	+	1510	5-7402000	+	2061	23996	17	0.069862	-34.528182	0	22	0.140584	1093.271197	-49.507598	2613	4289	-2.92385	606.728803	606.729	12	-4.94953	1.39791296251587e-69	-4.84654	4.42054091220483e-26
12368000	12370000	AT2G28830	yes	Chr2	12366747	12370684	1.32424	1.25226	12356000	12358000	AT2G28800	Chr2	12356363	12359252	0.971302	0.925118	yes	4600	interaction145483	2-12368000	+	1645	2-12356000	+	1289	11712	46	0.069862	-134.709091	0	39	0.076165	3577.279202	-107.961664	3045	1994	-2.91797	1022.720798	1022.72	50	0.821541	1.36248662448149e-07	2.74344	2.71225776889006e-66
11942000	11944000	AT1G32950	NA	Chr1	11941437	11944760	0.545383	0.573327	11920000	11922000	AT1G32900	Chr1	11920389	11923766	0.633711	0.693184	NA	2186.031929	interaction41443	1-11942000	+	2355	1-11920000	+	1711	21958	26	0.083092	-62.400566	0	22	0.099434	1545.710851	-49.521906	3569	2221	-2.91731	640.321078	640.321	22	-2.48354	1.3960087819152e-09	5.50165	5.50154724811729e-71
20152000	20154000	AT3G54440	yes	Chr3	20148291	20157138	0.809938	0.71031	20122000	20124000	AT3G54350	Chr3	20122082	20126872	0.854645	0.709595	NA	1400	interaction243520	3-20152000	+	1397	3-20122000	+	1828	29755	14	0.069862	-26.178887	0	10	0.081535	856.837008	-16.027034	2129	3053	-2.90561	543.162992	543.163	8	0.73759	8.19679802834876e-21	0.503687	2.73832295518053e-06
28338000	28340000	AT1G75500	yes	Chr1	28337725	28340275	1.77001	1.52154	28328000	28330000	AT1G75460	Chr1	28327885	28329764	0.9112	1.07444	yes	1800	interaction95703	1-28338000	+	581	1-28328000	+	1172	10203	18	0.069862	-37.579031	0	11	0.069862	1100	-18.462017	989	1864	-2.90222	700	700	14	-0.44292	0.0342540807853703	7.14775	1.74559557390169e-238
13676000	13678000	AT4G27310	NA	Chr4	13675637	13676910	0.603283	0.848634	13666000	13668000	AT4G27290	Chr4	13666280	13669202	0.641444	0.675834	NA	2400	interaction303800	4-13676000	+	910	4-13666000	+	1540	9963	24	0.069862	-56.025129	0	16	0.069862	1600	-31.690773	1335	2174	-2.86254	800	800	20	3.95534	3.91480909912275e-133	-4.145	2.41067158694016e-29
26844000	26846000	AT5G67280	yes	Chr5	26842269	26845190	0.640769	0.893244	26836000	26838000	AT5G67260	Chr5	26836147	26837811	0.61559	0.622327	NA	2400	interaction410444	5-26844000	+	1167	5-26836000	+	1117	7615	24	0.069862	-55.972625	0	16	0.069862	1600	-31.675342	1855	1656	-2.85875	800	800	20	1.93181	1.90909606378447e-27	1.48049	3.26428488647017e-26
24998000	25000000	AT1G66980	yes	Chr1	24997308	25001983	0.80125	1.88024	24992000	24994000	AT1G66970	Chr1	24992552	24996117	0.818376	1.54751	yes	4700	interaction84429	1-24998000	+	1054	1-24992000	+	2346	6029	47	0.069862	-138.77951	0	36	0.069862	3600	-97.252261	1076	2608	-2.85187	1100	1100	52	7.38135	0	6.69999	7.76316060686033e-215
1162000	1164000	AT5G04230	yes	Chr5	1160633	1163898	1.43469	1.47815	1136000	1138000	AT5G04140	Chr5	1129851	1138442	0.747643	0.588822	NA	1393.117943	interaction323905	5-1162000	+	2542	5-1136000	+	1722	25648	18	0.090266	-37.421065	0	15	0.114115	918.312911	-28.874088	3881	2344	-2.84014	474.805031	474.805	14	5.37806	2.09518392930628e-152	7.40463	1.23797485802098e-227
2558000	2560000	AT3G08020	NA	Chr3	2557436	2561802	0.742144	0.642044	2536000	2538000	AT3G07960	Chr3	2534886	2538372	0.626997	0.663109	yes	1900	interaction179686	3-2558000	+	1804	3-2536000	+	1610	22164	19	0.069862	-40.384435	0	18	0.098792	1272.897715	-37.391336	2868	2746	-2.81835	627.102285	627.102	14	0.976127	1.54263431422659e-12	-0.908032	0.00236808387653802
2080000	2082000	AT3G06650	NA	Chr3	2079032	2083291	0.741789	0.667537	2074000	2076000	AT3G06640	Chr3	2074188	2078317	0.53491	0.516312	NA	9607.993041	interaction178078	3-2080000	+	1553	3-2074000	+	2770	6032	122	0.088709	-473.208184	0	184	0.154231	8334.640327	-786.374271	2704	4547	-2.81729	1273.352714	1273.35	176	0.896053	1.48485929628757e-13	2.2149	2.99425924385214e-09
11558000	11560000	AT4G21750	yes	Chr4	11555185	11560733	2.72352	3.44668	11530000	11532000	AT4G21700	Chr4	11529955	11532844	0.689386	0.66873	NA	1700	interaction295938	4-11558000	+	2284	4-11530000	+	1453	28173	17	0.069862	-34.531337	0	20	0.125874	1110.029244	-43.350702	3722	2696	-2.81513	589.970756	589.971	12	4.09388	1.15165088157402e-33	-0.855366	4.93075149412535e-11
2056000	2058000	AT5G06680	NA	Chr5	2056586	2059787	0.708153	0.67327	2050000	2052000	AT5G06670	Chr5	2048242	2055019	0.71733	0.682193	NA	5700	interaction327049	5-2056000	+	1191	5-2050000	+	1529	6253	57	0.069862	-178.693586	0	45	0.069862	4500	-130.608522	1884	2410	-2.80889	1200	1200	66	-0.307161	0.00289568135139723	1.36366	1.3797081618539e-28
1208000	1210000	AT4G02730	NA	Chr4	1207724	1209287	0.844058	0.971679	1168000	1170000	AT4G02660	Chr4	1159666	1174321	0.729888	0.708662	yes	770.567651	interaction259177	4-1208000	+	2027	4-1168000	+	2169	40062	10	0.090663	-16.027898	0.000763	8	0.129661	431.044092	-11.49528	3368	3069	-2.80098	339.523559	339.524	6	-0.839179	0.000397277331710237	-1.45544	0.00144841635090342
3596000	3598000	AT3G11430	yes	Chr3	3595764	3597952	4.3963	3.9792	3566000	3568000	AT3G11385	Chr3	3566577	3568878	1.32746	1.95587	yes	1200	interaction183709	3-3596000	+	1452	3-3566000	+	2006	29778	12	0.069862	-20.945937	7e-06	18	0.175385	717.005051	-37.382696	3321	4210	-2.77518	482.994949	482.995	6	-5.20831	6.89970321147247e-35	-6.55376	6.75041685557771e-20
17918000	17920000	AT3G48380	NA	Chr3	17916415	17920237	0.832452	0.804253	17888000	17890000	AT3G48310	Chr3	17888100	17889814	2.61368	3.3304	yes	1700	interaction236017	3-17918000	+	1151	3-17888000	+	2255	30099	17	0.069862	-34.553296	0	12	0.075574	1109.30316	-20.935791	1974	3052	-2.77447	590.69684	590.697	12	-0.301183	0.000289213538494973	9.15888	2.91192112995899e-53
15690000	15692000	AT4G32520	NA	Chr4	15689463	15692857	0.778533	0.740552	15664000	15666000	AT4G32460	Chr4	15662265	15665013	1.15009	1.02494	yes	1400	interaction310625	4-15690000	+	2057	4-15664000	+	484	26004	14	0.069862	-26.286322	0	8	0.069862	800	-11.514056	3190	833	-2.76669	600	600	8	0.363447	6.45702174824659e-06	-0.990472	1.32142967223792e-09
13196000	13198000	AT4G26000	yes	Chr4	13197245	13199836	0.819427	0.755154	13182000	13184000	AT4G25960	Chr4	13177408	13183631	0.897734	1.03828	yes	1400	interaction301876	4-13196000	+	675	4-13182000	+	1581	14228	14	0.069862	-26.239621	0	8	0.069862	800	-11.510093	984	2329	-2.76442	600	600	8	0.282085	0.0430132982784237	4.96418	8.69686277185249e-89
21064000	21066000	AT3G56891	yes	Chr3	21064198	21064922	2.53472	3.44787	21050000	21052000	AT3G56860	Chr3	21048744	21052286	0.846948	0.779547	NA	1400	interaction246768	3-21064000	+	657	3-21050000	+	575	13307	14	0.069862	-26.260167	0	8	0.069862	800	-11.509138	1235	1029	-2.76388	600	600	8	-4.74252	8.19940921392541e-11	0.59865	8.49641262399108e-10
26634000	26636000	AT5G66700	yes	Chr5	26634319	26635885	2.51145	2.56194	26618000	26620000	AT5G66680	Chr5	26617543	26620667	0.751229	0.753788	NA	1400	interaction409814	5-26634000	+	596	5-26618000	+	967	15464	14	0.069862	-26.255275	0	8	0.069862	800	-11.506343	1188	1753	-2.76228	600	600	8	-2.15356	1.72155150212454e-06	-0.538876	2.60685424251577e-05
26580000	26582000	AT1G70510	yes	Chr1	26576485	26582431	2.84273	2.83268	26568000	26570000	AT1G70500	Chr1	26566578	26568729	1.58846	1.70966	yes	1400	interaction89568	1-26580000	+	1002	1-26568000	+	691	12054	14	0.069862	-26.236889	0	8	0.069862	800	-11.504548	1891	1319	-2.76126	600	600	8	1.49626	8.6784284394021e-05	-2.37498	5.4315105782246e-16
7172000	7174000	AT4G11950	yes	Chr4	7173275	7174259	1.10036	1.26501	7152000	7154000	AT4G11900	Chr4	7150240	7153571	0.866968	1.30149	yes	1400	interaction281280	4-7172000	+	925	4-7152000	+	2087	20548	14	0.069862	-26.2078	0	8	0.069862	800	-11.502778	1480	2841	-2.76025	600	600	8	-1.09042	0.0262722216371062	7.076	8.60879131104877e-83
13538000	13540000	AT2G31840	NA	Chr2	13537911	13539758	0.728462	0.595288	13522000	13524000	AT2G31800	Chr2	13520324	13523708	0.85287	0.832877	NA	1400	interaction149803	2-13538000	+	1894	2-13522000	+	962	15615	14	0.069862	-26.204503	0	8	0.069862	800	-11.50248	2726	1511	-2.76008	600	600	8	2.93376	3.67982393455971e-90	0.578147	7.76707728658111e-13
3958000	3960000	AT1G11730	NA	Chr1	3957472	3960113	0.755304	0.786215	3952000	3954000	AT1G11720	Chr1	3951552	3957044	0.699789	0.646045	NA	7000	interaction14110	1-3958000	+	1036	1-3952000	+	1078	5915	70	0.069862	-233.743726	0	57	0.069862	5700	-178.393679	1668	1537	-2.7568	1300	1300	86	1.0489	0.0031830585876881	2.93228	4.49379727985373e-42
5408000	5410000	AT1G15730	NA	Chr1	5407400	5409987	0.775681	0.655309	5376000	5378000	AT1G15630	Chr1	5376792	5378027	2.12358	2.52365	yes	1000	interaction18888	1-5408000	+	1592	1-5376000	+	1312	31965	10	0.069862	-16.037729	0.000763	9	0.111185	565.505923	-13.708076	2699	3284	-2.75594	434.494077	434.494	6	3.35755	3.97876819200447e-224	-4.46981	7.81254094191949e-16
16712000	16714000	AT4G35110	NA	Chr4	16712461	16714953	0.727985	0.797782	16710000	16712000	AT4G35100	Chr4	16708551	16710289	0.858984	1.12397	yes	4100	interaction314084	4-16712000	+	766	4-16710000	+	573	1925	41	0.069862	-116.407114	0	31	0.069862	3100	-79.613048	1175	799	-2.7502	1000	1000	42	-1.03333	0.00150341562538102	0.824068	0.00164515868026727
23532000	23534000	AT1G63450	yes	Chr1	23531408	23534569	1.89289	1.97092	23528000	23530000	AT1G63440	Chr1	23527654	23531109	0.812802	0.740054	yes	18600	interaction78986	1-23532000	+	1338	1-23528000	+	2427	4026	186	0.069862	-803.875791	0	334	0.139605	16714.214521	-1634.944353	2497	4457	-2.71509	1885.785479	1885.79	300	-5.30359	8.87959437446827e-32	-3.08086	2.57931379491646e-63
24998000	25000000	AT1G66980	yes	Chr1	24997308	25001983	0.80125	1.88024	24986000	24988000	AT1G66960	Chr1	24984940	24989797	2.11796	2.81176	yes	2600	interaction84426	1-24998000	+	1054	1-24986000	+	1883	12449	26	0.069862	-62.511587	0	18	0.069862	1800	-37.469106	1076	2535	-2.70901	800	800	22	7.38135	0	-3.92277	8.31383842294798e-06
6644000	6646000	AT5G19660	NA	Chr5	6642003	6646530	0.695813	0.668136	6604000	6606000	AT5G19560	Chr5	6603290	6606448	1.43543	1.11551	yes	978.1916	interaction343040	5-6644000	+	2343	5-6604000	+	1626	39811	11	0.078562	-18.44391	7.4e-05	9	0.109174	575.921086	-13.709058	3525	2469	-2.70408	402.270514	402.271	6	-0.29122	0.00828337450458761	-4.84814	3.02364322298786e-11
1140000	1142000	AT4G02590	NA	Chr4	1137497	1140499	0.707877	0.783534	1134000	1136000	AT4G02580	Chr4	1134466	1137156	0.828013	0.700807	NA	1000	interaction258889	4-1140000	+	255	4-1134000	+	677	5327	10	0.069862	-16.154796	0.000722	5	0.069862	500	-5.622512	518	1219	-2.70091	500	500	6	-0.730841	2.13818216552779e-07	-0.254253	0.00135458932686505
19568000	19570000	AT5G48290	yes	Chr5	19568895	19569799	1.32719	1.33666	19562000	19564000	AT5G48250	Chr5	19561318	19563722	0.79663	0.770365	NA	1000	interaction386799	5-19568000	+	306	5-19562000	+	898	6396	10	0.069862	-16.130342	0.000737	5	0.069862	500	-5.620436	624	1705	-2.6985	500	500	6	-4.5722	8.28178044994919e-79	-0.359373	0.0488379827870742
20808000	20810000	AT3G56070	NA	Chr3	20806748	20808152	0.699055	0.83409	20800000	20802000	AT3G56050	Chr3	20797954	20801165	0.741715	0.760569	NA	1000	interaction245818	3-20808000	+	537	3-20800000	+	554	7825	10	0.069862	-16.078165	0.000762	5	0.069862	500	-5.61745	1098	885	-2.69505	500	500	6	-0.593913	0.000941941952029913	1.2523	1.85282452452566e-25
8454000	8456000	AT3G23560	yes	Chr3	8454115	8456681	1.21299	1.02594	8438000	8440000	AT3G23530	Chr3	8436670	8442846	0.654791	0.662203	NA	1000	interaction200814	3-8454000	+	534	3-8438000	+	931	16443	10	0.069862	-16.078551	0.000762	5	0.069862	500	-5.616831	969	1405	-2.69434	500	500	6	-1.78465	1.71651182603744e-29	1.69133	5.59029699729605e-08
4448000	4450000	AT1G13040	NA	Chr1	4447646	4449200	0.744425	0.55535	4432000	4434000	AT1G12990	Chr1	4433639	4436075	0.815407	0.75832	NA	1000	interaction15743	1-4448000	+	2356	1-4432000	+	585	15836	10	0.069862	-16.072528	0.000763	5	0.069862	500	-5.616778	4006	977	-2.69428	500	500	6	-0.54745	0.0361487755970943	1.06327	8.307372301599e-08
6578000	6580000	AT1G19050	NA	Chr1	6577832	6579178	0.685608	0.793649	6564000	6566000	AT1G19010	Chr1	6565493	6567525	0.754428	0.779709	NA	1000	interaction23080	1-6578000	+	982	1-6564000	+	569	14028	10	0.069862	-16.0743	0.000762	5	0.069862	500	-5.616739	1722	983	-2.69423	500	500	6	1.18386	0.000173198299284691	0.844624	1.89615510518833e-08
15422000	15424000	AT2G36800	NA	Chr2	15423379	15425016	0.627547	0.824889	15396000	15398000	AT2G36720	Chr2	15393070	15399418	0.840358	0.7116	NA	1000	interaction156639	2-15422000	+	821	2-15396000	+	1324	26103	10	0.069862	-16.054444	0.000763	5	0.069862	500	-5.616536	1015	1763	-2.694	500	500	6	5.78445	1.40803302308492e-47	0.416062	0.0126281868924055
18350000	18352000	AT5G45290	NA	Chr5	18349781	18352498	0.814422	0.772815	18336000	18338000	AT5G45275	Chr5	18334404	18337380	0.668017	0.713901	NA	1000	interaction382969	5-18350000	+	1533	5-18336000	+	628	13769	10	0.069862	-16.068214	0.000763	5	0.069862	500	-5.616015	2687	1108	-2.6934	500	500	6	-0.421688	0.0120291484814903	-0.690012	0.0141607068534386
15612000	15614000	AT5G39000	yes	Chr5	15611859	15614481	2.47707	2.98693	15594000	15596000	AT5G38970	Chr5	15594673	15597885	1.30497	1.14987	yes	1000	interaction374072	5-15612000	+	1670	5-15594000	+	774	17454	10	0.069862	-16.057162	0.000763	5	0.069862	500	-5.61565	2375	1184	-2.69297	500	500	6	-4.9922	1.19902753421902e-08	-1.0848	0.00324003637038453
17138000	17140000	AT4G36220	yes	Chr4	17137343	17139635	1.8424	3.39251	17120000	17122000	AT4G36180	Chr4	17120084	17123841	0.576587	0.628861	NA	1000	interaction315629	4-17138000	+	861	4-17120000	+	1543	17759	10	0.069862	-16.052366	0.000763	5	0.069862	500	-5.615539	1209	2494	-2.69285	500	500	6	2.05892	0.000152345458179144	-0.834027	0.00348514347951598
10654000	10656000	AT4G19530	yes	Chr4	10651743	10657282	0.848773	1.33432	10628000	10630000	AT4G19500	Chr4	10625658	10631570	0.814103	0.714032	NA	1000	interaction292860	4-10654000	+	1666	4-10628000	+	968	25912	10	0.069862	-16.047654	0.000763	5	0.069862	500	-5.61489	2004	1381	-2.6921	500	500	6	6.51413	2.30996843186456e-147	1.48346	1.57893516643006e-31
9832000	9834000	AT3G26744	NA	Chr3	9832688	9835247	0.785683	0.800003	9816000	9818000	AT3G26720	Chr3	9816580	9823186	0.811297	0.755546	NA	1000	interaction205348	3-9832000	+	901	3-9816000	+	915	16041	10	0.069862	-16.050473	0.000763	5	0.069862	500	-5.614803	1408	1639	-2.692	500	500	6	2.38083	1.00083170649381e-60	-1.00694	1.04326948185909e-11
25290000	25292000	AT1G67500	NA	Chr1	25287706	25296937	0.642623	0.628914	25260000	25262000	AT1G67420	Chr1	25255231	25260430	0.642532	0.665573	NA	1000	interaction85530	1-25290000	+	2059	1-25260000	+	891	29807	10	0.069862	-16.05093	0.000763	5	0.069862	500	-5.614796	3162	1410	-2.69199	500	500	6	-1.03578	5.81599355284701e-06	-1.00395	1.69600718688732e-15
10452000	10454000	AT2G24600	yes	Chr2	10452115	10454524	1.12093	0.988311	10418000	10420000	AT2G24520	Chr2	10415431	10419783	0.761413	0.847934	yes	1000	interaction139185	2-10452000	+	1074	2-10418000	+	1276	34071	10	0.069862	-16.043916	0.000763	5	0.069862	500	-5.614411	1543	2134	-2.69155	500	500	6	2.85683	4.64675031791423e-07	1.33383	3.49370715869399e-20
8734000	8736000	AT2G20250	NA	Chr2	8733749	8736577	0.695877	0.571105	8714000	8716000	AT2G20190	Chr2	8711595	8719018	0.855979	0.728942	NA	1000	interaction133311	2-8734000	+	1237	2-8714000	+	1577	20202	10	0.069862	-16.039421	0.000763	5	0.069862	500	-5.614341	1570	2497	-2.69147	500	500	6	5.05851	2.15590023844444e-96	0.322571	0.00174849454977593
17454000	17456000	AT3G47370	NA	Chr3	17453477	17454721	0.734081	0.669042	17438000	17440000	AT3G47340	Chr3	17437883	17441243	0.768005	0.716034	NA	1000	interaction234263	3-17454000	+	1045	3-17438000	+	1328	16154	10	0.069862	-16.044863	0.000763	5	0.069862	500	-5.614283	1683	1593	-2.6914	500	500	6	-0.515311	1.23415088245857e-06	5.50478	1.69868612510841e-09
18108000	18110000	AT2G43680	NA	Chr2	18108348	18111831	0.671615	0.689652	18092000	18094000	AT2G43620	Chr2	18093769	18095025	2.35518	2.84519	yes	1000	interaction166047	2-18108000	+	1050	2-18092000	+	982	16050	10	0.069862	-16.047114	0.000763	5	0.069862	500	-5.614041	2006	1697	-2.69112	500	500	6	-0.365056	0.0123096961480184	5.48761	7.0147764491327e-17
1800000	1802000	AT5G05980	NA	Chr5	1799489	1804492	0.7189	0.749311	1770000	1772000	AT5G05880	Chr5	1769647	1771515	0.689758	0.70431	NA	1000	interaction326270	5-1800000	+	1221	5-1770000	+	920	29574	10	0.069862	-16.049632	0.000763	5	0.069862	500	-5.61392	2199	1754	-2.69098	500	500	6	-0.490109	0.000154004756653374	-3.0422	1.61911100061921e-41
19270000	19272000	AT1G51880	yes	Chr1	19270192	19274068	2.15673	2.95586	19216000	19218000	AT1G51800	Chr1	19214147	19217970	0.895504	1.10386	yes	1000	interaction64837	1-19270000	+	1201	1-19216000	+	1614	54085	10	0.069862	-16.040308	0.000763	5	0.069862	500	-5.613882	1773	1999	-2.69094	500	500	6	-5.75359	8.00641733934526e-38	-1.22176	0.000697390718735551
1406000	1408000	AT3G05040	NA	Chr3	1401270	1408197	0.684218	0.644251	1374000	1376000	AT3G04960	Chr3	1373687	1375892	0.723919	0.776622	NA	1000	interaction175846	3-1406000	+	1150	3-1374000	+	1705	32062	10	0.069862	-16.041661	0.000763	5	0.069862	500	-5.613688	1875	2834	-2.69072	500	500	6	-0.380385	0.0072670085460063	1.33581	0.000374609841023187
23496000	23498000	AT1G63350	yes	Chr1	23494934	23497631	1.20821	1.85242	23456000	23458000	AT1G63240	Chr1	23456020	23458661	0.819756	1.25776	yes	900	interaction78832	1-23496000	+	2232	1-23456000	+	1210	40042	9	0.069862	-13.72107	0.007132	5	0.07602	459.497958	-5.613611	3158	1919	-2.69063	440.502042	440.502	4	1.12647	2.50942866144952e-05	2.39573	8.5803836374301e-38
2112000	2114000	AT1G06890	NA	Chr1	2111362	2114601	0.800572	0.783658	2094000	2096000	AT1G06820	Chr1	2092945	2096232	0.940912	0.957184	yes	1000	interaction7408	1-2112000	+	1250	1-2094000	+	1308	18182	10	0.069862	-16.039113	0.000763	5	0.069862	500	-5.613292	2126	2287	-2.69026	500	500	6	-0.673313	2.21345502032887e-07	1.46314	1.74519689554714e-60
7046000	7048000	AT4G11670	NA	Chr4	7044243	7053091	0.74522	0.715996	7016000	7018000	AT4G11610	Chr4	7013728	7018049	1.29949	1.58962	yes	1000	interaction280826	4-7046000	+	1345	4-7016000	+	2238	30412	10	0.069862	-16.037045	0.000763	8	0.097556	572.899667	-11.498904	2020	3850	-2.68971	427.100333	427.1	6	-0.462391	0.000578035696335415	-5.61028	1.96617018918136e-19
22390000	22392000	AT1G60810	NA	Chr1	22388526	22391165	0.694277	0.69863	22386000	22388000	AT1G60800	Chr1	22383452	22387457	0.777678	0.768583	NA	2000	interaction75096	1-22390000	+	651	1-22386000	+	486	4135	20	0.069862	-43.64501	0	13	0.069862	1300	-23.563466	1196	786	-2.68557	700	700	16	-0.896524	1.35592157818194e-28	1.63703	3.56307710118211e-42
586000	588000	AT4G01430	yes	Chr4	585597	588029	4.30093	2.93086	578000	580000	AT4G01410	Chr4	578164	579169	1.7791	2.55492	yes	3400	interaction257135	4-586000	+	542	4-578000	+	851	8504	34	0.069862	-90.548855	0	25	0.069862	2500	-59.273285	904	1476	-2.67855	900	900	32	-1.32707	1.87562148204295e-10	0.960803	1.63190418708367e-05
26742000	26744000	AT1G70940	NA	Chr1	26743053	26746395	0.731578	0.825416	26732000	26734000	AT1G70900	Chr1	26731812	26733875	0.87831	0.897114	yes	2000	interaction90076	1-26742000	+	776	1-26732000	+	998	9684	20	0.069862	-43.509939	0	13	0.069862	1300	-23.526426	1389	1956	-2.67508	700	700	16	1.6322	1.08081107907901e-16	0.601008	0.000305011351230392
17734000	17736000	AT3G48050	NA	Chr3	17733532	17739412	0.460551	0.425977	17726000	17728000	AT3G48030	Chr3	17725409	17727954	0.738689	0.747115	NA	2000	interaction235302	3-17734000	+	1185	3-17726000	+	654	8435	20	0.069862	-43.552001	0	13	0.069862	1300	-23.525475	1773	1417	-2.67481	700	700	16	-0.21971	0.00956971279932326	-0.321751	0.00305845065150885
2492000	2494000	AT4G04910	yes	Chr4	2489416	2495766	0.781356	0.783627	2478000	2480000	AT4G04890	Chr4	2476488	2482345	2.47839	3.36641	yes	4200	interaction264483	4-2492000	+	1354	4-2478000	+	1562	13881	42	0.069862	-119.360915	0	32	0.069862	3200	-82.752863	2074	2397	-2.67199	1000	1000	44	-0.577601	4.97832866191823e-09	3.71555	2.38230583741627e-36
2094000	2096000	AT3G66658	NA	Chr3	2095104	2099151	0.768999	0.721608	2074000	2076000	AT3G06640	Chr3	2074188	2078317	0.53491	0.516312	NA	1400	interaction178144	3-2094000	+	1113	3-2074000	+	2770	20108	14	0.069862	-26.193332	0	14	0.109855	890.322769	-26.16337	1926	4547	-2.66622	509.677231	509.677	8	-0.586835	4.12297179493997e-10	2.2149	2.99425924385214e-09
8238000	8240000	AT2G18990	yes	Chr2	8238690	8240002	0.84181	0.770683	8224000	8226000	AT2G18960	Chr2	8221630	8227622	0.72423	0.696021	NA	3300	interaction131534	2-8238000	+	1677	2-8224000	+	1613	13964	33	0.069862	-86.334647	0	33	0.09226	2498.856592	-86.217407	2843	2587	-2.6585	801.143408	801.143	32	0.260693	0.0298322929636785	-0.306745	0.0460319214164212
12436000	12438000	AT2G28960	yes	Chr2	12437913	12442347	3.14401	3.61957	12432000	12434000	AT2G28950	Chr2	12431340	12433595	0.565797	0.851628	NA	2700	interaction145688	2-12436000	+	1043	2-12432000	+	572	3964	27	0.069862	-66.09987	0	19	0.069862	1900	-40.459374	1347	906	-2.64514	800	800	24	-5.37377	2.41102155837694e-45	3.42492	2.77060406899097e-61
8610000	8612000	AT3G23840	yes	Chr3	8611125	8612690	1.64369	2.31604	8604000	8606000	AT3G23820	Chr3	8603443	8605462	0.558869	0.938768	NA	2700	interaction201341	3-8610000	+	939	3-8604000	+	724	6377	27	0.069862	-65.976752	0	19	0.069862	1900	-40.433458	1720	1067	-2.6406	800	800	24	4.10373	3.2240272768074e-30	0.58401	3.96166893682969e-05
10752000	10754000	AT1G30420	NA	Chr1	10748815	10756316	0.555092	0.574199	10734000	10736000	AT1G30400	Chr1	10727637	10738055	0.804175	0.732431	NA	2996.379707	interaction37688	1-10752000	+	2232	1-10734000	+	1621	18243	32	0.07461	-82.816361	0	35	0.108053	2262.942077	-93.323743	3294	2615	-2.63663	733.43763	733.438	30	-2.00563	2.07427282472961e-14	-1.09065	2.30060163399772e-25
23412000	23414000	AT5G57790	yes	Chr5	23412024	23413627	0.98324	1.24505	23406000	23408000	AT5G57780	Chr5	23405323	23406351	4.49589	4.32556	yes	6400	interaction399439	5-23412000	+	1520	5-23406000	+	1045	6247	64	0.069862	-208.062342	0	52	0.069862	5200	-158.225046	2063	1462	-2.62809	1200	1200	78	2.52723	1.6591568521633e-31	3.69474	5.38645629006225e-76
20054000	20056000	AT1G53710	NA	Chr1	20053160	20056396	0.693941	0.755042	20048000	20050000	AT1G53700	Chr1	20048585	20050115	3.24761	3.42607	yes	12400	interaction67313	1-20054000	+	1937	1-20048000	+	1656	5478	124	0.069862	-482.686653	0	171	0.109944	10865.924259	-717.910167	3108	2820	-2.62245	1534.075741	1534.08	180	-0.712622	3.77270823268272e-13	-1.17916	2.0262765549345e-05
24686000	24688000	AT1G66240	yes	Chr1	24686255	24687332	0.879474	0.979591	24676000	24678000	AT1G66230	Chr1	24677153	24678415	0.958492	1.33176	yes	1500	interaction83336	1-24686000	+	581	1-24676000	+	744	9043	15	0.069862	-28.993859	0	9	0.069862	900	-13.723935	1079	1204	-2.61719	600	600	10	-0.839397	7.68097045966993e-05	1.77547	2.70133567066035e-10
24994000	24996000	AT1G66970	yes	Chr1	24992552	24996117	0.818376	1.54751	24974000	24976000	AT1G66940	Chr1	24973027	24974791	0.682063	0.741613	NA	1500	interaction84386	1-24994000	+	1927	1-24974000	+	1138	20361	15	0.069862	-28.915722	0	9	0.069862	900	-13.720098	2352	1262	-2.61551	600	600	10	6.69999	7.76316060686033e-215	8.30084	2.67811604995356e-136
8396000	8398000	AT4G14640	yes	Chr4	8397711	8400076	1.63119	1.5229	8380000	8382000	AT4G14605	Chr4	8378428	8380714	0.758401	0.723243	NA	1500	interaction285126	4-8396000	+	873	4-8380000	+	707	16098	15	0.069862	-28.965324	0	9	0.069862	900	-13.719607	1669	1290	-2.6153	600	600	10	-2.6017	3.36420487304634e-12	1.75593	1.50506018269199e-21
19244000	19246000	AT1G51830	yes	Chr1	19243024	19246010	2.23464	2.32675	19216000	19218000	AT1G51800	Chr1	19214147	19217970	0.895504	1.10386	yes	1500	interaction64668	1-19244000	+	750	1-19216000	+	1614	28363	15	0.069862	-28.957796	0	9	0.069862	900	-13.718609	1351	1999	-2.61486	600	600	10	-5.56695	4.51836677937221e-59	-1.22176	0.000697390718735551
1150000	1152000	AT5G04190	NA	Chr5	1150891	1152481	0.707659	0.729125	1130000	1132000	AT5G04140	Chr5	1129851	1138442	0.747643	0.588822	NA	1500	interaction323835	5-1150000	+	958	5-1130000	+	1925	20170	15	0.069862	-28.930978	0	9	0.069862	900	-13.716386	1510	2794	-2.61389	600	600	10	7.13978	3.65984908421071e-84	7.40463	1.23797485802098e-227
21174000	21176000	AT1G56520	yes	Chr1	21174663	21178974	1.14379	2.14797	21158000	21160000	AT1G56500	Chr1	21159743	21167321	0.857098	0.765229	NA	1500	interaction71155	1-21174000	+	1460	1-21158000	+	1068	15750	15	0.069862	-28.921041	0	9	0.069862	900	-13.715839	1674	1555	-2.61366	600	600	10	6.81212	1.85283684800453e-72	4.0111	3.33265162847515e-131
18688000	18690000	AT1G50450	NA	Chr1	18687784	18690371	0.86369	0.71105	18662000	18664000	AT1G50380	Chr1	18662308	18666478	0.7796	0.674781	NA	1500	interaction62784	1-18688000	+	1251	1-18662000	+	1508	25545	15	0.069862	-28.908398	0	9	0.069862	900	-13.713197	1817	2715	-2.6125	600	600	10	4.17946	6.854344656849e-76	-0.335948	0.000981459657236001
10906000	10908000	AT1G30755	NA	Chr1	10905816	10908892	0.63425	0.742366	10884000	10886000	AT1G30680	Chr1	10881596	10886425	0.728454	0.645034	NA	1500	interaction38228	1-10906000	+	1164	1-10884000	+	1128	21850	15	0.069862	-28.916441	0	9	0.069862	900	-13.711699	2009	2064	-2.61185	600	600	10	-0.846839	8.31185749040791e-08	1.46757	7.14584221449414e-29
12592000	12594000	AT2G29320	yes	Chr2	12592147	12593686	1.11773	1.85477	12586000	12588000	AT2G29290	Chr2	12585855	12587742	0.918742	1.23115	NA	2100	interaction146502	2-12592000	+	965	2-12586000	+	492	5522	21	0.069862	-46.726826	0	14	0.069862	1400	-26.261879	1227	568	-2.60418	700	700	16	0.990224	0.000675468637501596	8.77262	3.25688570577712e-117
20728000	20730000	AT5G50950	yes	Chr5	20729611	20733926	1.2049	1.56891	20726000	20728000	AT5G50940	Chr5	20724577	20726479	0.909763	0.96671	yes	2800	interaction390747	5-20728000	+	552	5-20726000	+	715	2085	28	0.069862	-69.503023	0	20	0.069862	2000	-43.585204	582	830	-2.59955	800	800	26	6.1271	1.40186331499601e-79	1.16245	0.000401902225450875
29960000	29962000	AT1G79620	NA	Chr1	29957561	29962305	0.554147	0.596723	29928000	29930000	AT1G79560	Chr1	29926793	29932585	0.700366	0.619533	NA	901.426495	interaction100632	1-29960000	+	2155	1-29928000	+	1744	32170	10	0.077502	-16.030823	0.000763	9	0.119645	525.520763	-13.707441	3321	2872	-2.59795	375.905732	375.906	6	-0.974573	1.25866340577251e-08	1.85967	1.12908474345669e-14
28244000	28246000	AT1G75250	yes	Chr1	28244316	28245501	2.66309	2.68859	28240000	28242000	AT1G75240	Chr1	28241071	28242756	1.24679	5.62848	yes	2100	interaction95425	1-28244000	+	462	1-28240000	+	1033	3712	21	0.069862	-46.752778	0	14	0.069862	1400	-26.228115	748	1188	-2.59588	700	700	16	2.95927	8.55148810425194e-06	6.95089	2.13673226032525e-164
12142000	12144000	AT4G23190	NA	Chr4	12141031	12143833	0.681408	0.637398	12136000	12138000	AT4G23170	Chr4	12135092	12136157	1.19817	2.62057	yes	2100	interaction297735	4-12142000	+	1593	4-12136000	+	473	5797	21	0.069862	-46.742874	0	14	0.069862	1400	-26.224944	2219	771	-2.59511	700	700	16	0.949552	0.0112233727227386	4.27946	6.59824413301982e-35
7902000	7904000	AT5G23440	NA	Chr5	7903044	7903845	0.712563	0.842904	7900000	7902000	AT5G23430	Chr5	7893670	7900387	0.668626	0.701943	NA	2800	interaction347327	5-7902000	+	947	5-7900000	+	348	1747	28	0.069862	-69.894335	0	20	0.069862	2000	-43.556587	1623	643	-2.59494	800	800	26	2.0871	2.5670038207467e-42	-0.853152	1.21849297777916e-19
6826000	6828000	AT5G20230	yes	Chr5	6826505	6827629	3.24843	3.9322	6822000	6824000	AT5G20220	Chr5	6821989	6825981	0.752102	0.979611	yes	3600	interaction343634	5-6826000	+	623	5-6822000	+	875	3869	36	0.069862	-97.667859	0	27	0.069862	2700	-65.93452	797	1395	-2.58867	900	900	36	4.72113	5.08612734632368e-58	2.90305	2.08045361629059e-37
23652000	23654000	AT1G63750	yes	Chr1	23650847	23655363	0.989777	0.962033	23624000	23626000	AT1G63700	Chr1	23624665	23629112	0.84574	0.707138	yes	1100	interaction79446	1-23652000	+	2116	1-23624000	+	1452	27839	11	0.069862	-18.447274	7.4e-05	8	0.08426	663.297662	-11.49794	3023	2222	-2.58062	436.702338	436.702	6	2.68573	2.21561601326895e-34	0.430874	0.000901994317630334
27990000	27992000	AT1G74470	NA	Chr1	27991164	27993006	0.789626	0.74544	27988000	27990000	AT1G74460	Chr1	27987960	27989801	1.0189	1.10304	yes	6600	interaction94476	1-27990000	+	907	1-27988000	+	1200	2430	66	0.069862	-216.870055	0	54	0.069862	5400	-166.231039	1502	1905	-2.57985	1200	1200	80	5.26401	1.15176495966908e-252	-5.09284	2.76723772571581e-44
23560000	23562000	AT1G63520	NA	Chr1	23559886	23562143	0.530479	0.653546	23556000	23558000	AT1G63500	Chr1	23555685	23558899	0.794887	0.753356	NA	4500	interaction79088	1-23560000	+	1178	1-23556000	+	789	3442	45	0.069862	-131.3258	0	35	0.069862	3500	-93.535392	1915	1326	-2.5723	1000	1000	48	-1.64167	3.96460628505672e-05	-0.406534	0.00192644943403168
17494000	17496000	AT3G47470	NA	Chr3	17493371	17495033	0.77183	0.812234	17484000	17486000	AT3G47450	Chr3	17483067	17486347	0.722242	0.668821	NA	2800	interaction234408	3-17494000	+	1022	3-17484000	+	1770	9832	28	0.069862	-69.201942	0	20	0.069862	2000	-43.390983	1655	2383	-2.56866	800	800	24	6.24911	6.58712260229039e-170	3.60313	5.72727735857587e-107
23658000	23660000	AT1G63770	NA	Chr1	23657505	23664677	0.817731	0.776639	23626000	23628000	AT1G63700	Chr1	23624665	23629112	0.84574	0.707138	yes	785.728923	interaction79480	1-23658000	+	2303	1-23626000	+	1685	32194	9	0.080022	-13.714425	0.007132	7	0.109361	447.175572	-9.40012	3604	2419	-2.54485	338.553352	338.553	4	0.256064	0.0481110763202539	0.430874	0.000901994317630334
19904000	19906000	AT1G53350	yes	Chr1	19903898	19907515	0.939541	1.21103	19886000	19888000	AT1G53310	Chr1	19884026	19888369	0.718735	0.665584	NA	1900	interaction66823	1-19904000	+	1458	1-19886000	+	1647	17895	19	0.069862	-40.39446	0	14	0.074037	1321.046506	-26.156941	2285	2583	-2.54456	578.953494	578.953	14	1.14402	2.87398606317224e-11	-1.34852	3.32241668751293e-40
23618000	23620000	AT1G63690	NA	Chr1	23618377	23622396	0.79955	0.777172	23616000	23618000	AT1G63680	Chr1	23614436	23617767	0.7082	0.655675	NA	2900	interaction79321	1-23618000	+	335	1-23616000	+	965	2116	29	0.069862	-73.388707	0	21	0.069862	2100	-46.676575	563	1499	-2.54364	800	800	26	0.474601	1.51161850848892e-06	2.1367	7.09746725081221e-43
28124000	28126000	AT1G74860	NA	Chr1	28123318	28125882	0.743711	0.68038	28118000	28120000	AT1G74850	Chr1	28118848	28122314	0.731402	0.595545	NA	2900	interaction94954	1-28124000	+	489	1-28118000	+	1553	5663	29	0.069862	-73.013691	0	21	0.069862	2100	-46.609938	697	2499	-2.53388	800	800	26	0.584255	0.000176995215600604	2.73172	2.8872938630205e-116
12668000	12670000	AT2G29630	NA	Chr2	12666934	12670311	0.7643	0.749649	12664000	12666000	AT2G29620	Chr2	12662740	12665803	0.682439	0.699361	NA	6700.144129	interaction146808	2-12668000	+	2256	2-12664000	+	2062	3786	92	0.095928	-330.191353	0	99	0.120073	5760.110659	-361.69176	3066	3122	-2.52519	940.03347	940.033	122	3.53512	3.93327578176328e-100	-4.71542	4.51363546488392e-64
15852000	15854000	AT2G37840	NA	Chr2	15851802	15856301	0.770695	0.811648	15834000	15836000	AT2G37770	Chr2	15834866	15837001	0.674575	0.769167	NA	2100	interaction158245	2-15852000	+	1980	2-15834000	+	1477	17524	21	0.069862	-46.463319	0	22	0.102909	1493.525126	-49.512255	3320	2471	-2.52492	606.474874	606.475	16	-0.376545	0.00666051823627552	6.06557	2.21492989010461e-11
310000	312000	AT1G01900	yes	Chr1	310315	313130	1.02958	1.06939	286000	288000	AT1G01790	Chr1	284609	291094	0.78608	0.599279	NA	900	interaction890	1-310000	+	2345	1-286000	+	1159	24178	9	0.069862	-13.722108	0.007132	7	0.094842	515.627855	-9.400959	3538	2137	-2.51993	384.372145	384.372	4	1.19483	2.20031643113577e-07	2.94604	3.3827967192309e-38
21540000	21542000	AT1G58190	yes	Chr1	21540631	21548112	1.04783	1.07055	21538000	21540000	AT1G58180	Chr1	21537769	21539914	0.726593	0.726178	NA	1600	interaction72347	1-21540000	+	796	1-21538000	+	181	1619	16	0.069862	-32.213518	0	10	0.069862	1000	-16.103903	1308	391	-2.51622	600	600	12	-2.12865	7.7634987500645e-11	1.24045	4.91921306905333e-19
1528000	1530000	AT3G05350	NA	Chr3	1526962	1533867	0.76206	0.65123	1520000	1522000	AT3G05330	Chr3	1518881	1521494	0.582754	0.590244	NA	2200	interaction176199	3-1528000	+	621	3-1520000	+	1344	7992	22	0.069862	-49.770051	0	15	0.069862	1500	-28.9261	1009	2030	-2.50829	700	700	18	2.13184	2.37939104446102e-61	1.00152	1.05512620305517e-05
4772000	4774000	AT1G13950	NA	Chr1	4773575	4774867	0.789938	0.836441	4766000	4768000	AT1G13940	Chr1	4762702	4766749	0.781313	0.713286	NA	1600	interaction16721	1-4772000	+	570	1-4766000	+	363	6364	16	0.069862	-31.906656	0	10	0.069862	1000	-16.073624	989	575	-2.50552	600	600	10	-2.72983	2.5593432825737e-63	0.470995	8.04779319224279e-05
2632000	2634000	AT4G05120	NA	Chr4	2632692	2635000	0.566004	0.656664	2628000	2630000	AT4G05110	Chr4	2626404	2628830	1.78884	1.56541	yes	1600	interaction264952	4-2632000	+	464	4-2628000	+	367	4570	16	0.069862	-31.903386	0	10	0.069862	1000	-16.06389	678	761	-2.50211	600	600	10	0.996069	5.02479773763471e-07	4.26872	6.45769134230748e-09
9424000	9426000	AT3G25800	NA	Chr3	9422587	9426044	0.891713	0.776425	9410000	9412000	AT3G25780	Chr3	9409289	9410567	2.00213	1.07526	yes	1600	interaction204026	3-9424000	+	1492	3-9410000	+	418	13624	16	0.069862	-31.867259	0	10	0.069862	1000	-16.054444	2724	821	-2.49881	600	600	10	-0.366881	0.00540516122317617	-3.16683	6.09556392111134e-22
28240000	28242000	AT1G75240	yes	Chr1	28241071	28242756	1.24679	5.62848	28226000	28228000	AT1G75210	Chr1	28223868	28228975	0.830241	0.744757	NA	1600	interaction95410	1-28240000	+	1033	1-28226000	+	1334	14375	16	0.069862	-31.714094	0	10	0.069862	1000	-16.040642	1188	1839	-2.49401	600	600	10	6.95089	2.13673226032525e-164	1.36632	2.26396198499253e-16
19474000	19476000	AT3G52525	yes	Chr3	19475158	19475961	2.77184	3.65911	19466000	19468000	AT3G52500	Chr3	19465498	19467386	0.592106	0.766751	NA	1600	interaction241243	3-19474000	+	1062	3-19466000	+	736	8248	16	0.069862	-31.755846	0	10	0.069862	1000	-16.040513	1481	1193	-2.49396	600	600	10	3.90659	1.35583195347222e-23	1.55146	1.88135308339438e-07
208000	210000	AT2G01460	NA	Chr2	206135	211919	0.69023	0.64167	192000	194000	AT2G01440	Chr2	193700	199248	0.779379	0.662946	NA	1600	interaction102852	2-208000	+	776	2-192000	+	1058	15223	16	0.069862	-31.748347	0	10	0.069862	1000	-16.03916	1248	1754	-2.49349	600	600	10	-0.438554	0.0061468004602199	0.769447	8.63117336134541e-14
9590000	9592000	AT3G26200	yes	Chr3	9589281	9591179	4.05605	5.36528	9578000	9580000	AT3G26180	Chr3	9578216	9580086	0.557025	0.725699	yes	1600	interaction204468	3-9590000	+	859	3-9578000	+	946	11553	16	0.069862	-31.735029	0	10	0.069862	1000	-16.037922	1331	1303	-2.49306	600	600	10	7.13023	2.83370302680337e-47	5.47104	2.99532126186073e-28
646000	648000	AT5G02830	NA	Chr5	644278	648466	0.721565	0.655266	630000	632000	AT5G02780	Chr5	630875	632683	1.47325	1.11006	yes	1600	interaction322032	5-646000	+	1625	5-630000	+	783	15879	16	0.069862	-31.747114	0	10	0.069862	1000	-16.032152	2381	1640	-2.49106	600	600	10	3.14149	1.12002406293175e-31	-5.45508	4.45003177841748e-68
20728000	20730000	AT5G50950	yes	Chr5	20729611	20733926	1.2049	1.56891	20716000	20718000	AT5G50920	Chr5	20715468	20720374	0.879309	0.898954	yes	1100	interaction390743	5-20728000	+	552	5-20716000	+	1157	11678	11	0.069862	-18.49879	7.3e-05	6	0.069862	600	-7.446125	582	1875	-2.49067	500	500	6	6.1271	1.40186331499601e-79	2.37385	2.22565892649025e-71
2354000	2356000	AT3G07360	NA	Chr3	2354718	2356854	0.649286	0.766941	2346000	2348000	AT3G07350	Chr3	2347467	2348791	1.46595	1.00748	NA	1100	interaction179030	3-2354000	+	700	3-2346000	+	372	7838	11	0.069862	-18.539344	7.2e-05	6	0.069862	600	-7.444037	1244	659	-2.48916	500	500	6	0.838156	6.21709237879104e-17	2.21583	9.83663853029963e-61
18626000	18628000	AT2G45180	yes	Chr2	18626319	18626997	1.05825	1.40964	18614000	18616000	AT2G45150	Chr2	18613304	18615717	0.705132	0.719403	NA	1100	interaction167723	2-18626000	+	542	2-18614000	+	705	12415	11	0.069862	-18.500331	7.3e-05	6	0.069862	600	-7.441242	801	1387	-2.48714	500	500	6	5.40614	2.16145275382259e-32	1.49251	1.0858451051828e-13
21174000	21176000	AT1G56520	yes	Chr1	21174663	21178974	1.14379	2.14797	21160000	21162000	AT1G56500	Chr1	21159743	21167321	0.857098	0.765229	NA	1100	interaction71156	1-21174000	+	1460	1-21160000	+	669	14025	11	0.069862	-18.484206	7.4e-05	6	0.069862	600	-7.44085	1674	826	-2.48685	500	500	6	6.81212	1.85283684800453e-72	4.0111	3.33265162847515e-131
18006000	18008000	AT2G43340	yes	Chr2	18007696	18008665	0.779312	0.81896	17998000	18000000	AT2G43320	Chr2	17996649	17999927	0.735892	0.756945	NA	1100	interaction165673	2-18006000	+	565	2-17998000	+	1016	7734	11	0.069862	-18.496869	7.4e-05	6	0.069862	600	-7.440283	865	1788	-2.48644	500	500	6	-0.518965	3.9260368932949e-05	-0.778584	5.22509928491435e-07
20352000	20354000	AT5G50020	yes	Chr5	20351159	20354436	0.856202	0.826671	20338000	20340000	AT5G49990	Chr5	20337640	20341881	0.654422	0.644212	NA	1100	interaction389717	5-20352000	+	1625	5-20338000	+	549	13664	11	0.069862	-18.499246	7.3e-05	6	0.069862	600	-7.439907	2560	893	-2.48617	500	500	6	0.510759	2.60830508523571e-05	-0.568401	0.0469486917093269
27728000	27730000	AT1G73720	NA	Chr1	27725001	27729931	0.804099	0.698568	27720000	27722000	AT1G73710	Chr1	27721189	27724165	0.697287	0.652357	NA	1100	interaction93417	1-27728000	+	686	1-27720000	+	523	7355	11	0.069862	-18.503422	7.3e-05	6	0.069862	600	-7.439554	1163	921	-2.48592	500	500	6	0.217793	0.0234912772134125	1.28816	5.84564543999485e-24
18828000	18830000	AT3G50670	yes	Chr3	18826299	18829618	0.804662	0.782573	18802000	18804000	AT3G50640	Chr3	18803802	18804663	1.79747	1.8125	yes	1100	interaction239048	3-18828000	+	855	3-18802000	+	562	26072	11	0.069862	-18.497304	7.3e-05	6	0.069862	600	-7.43893	1361	975	-2.48547	500	500	6	0.494	0.0105678326842771	-5.73966	1.79675292049367e-35
9500000	9502000	AT4G16890	NA	Chr4	9500505	9505455	0.596102	0.578236	9490000	9492000	AT4G16860	Chr4	9488465	9495816	0.753631	0.663132	NA	1100	interaction289068	4-9500000	+	1195	4-9490000	+	884	9518	11	0.069862	-18.467518	7.4e-05	6	0.069862	600	-7.438685	1288	998	-2.48529	500	500	6	2.55938	2.02741479868906e-44	3.98441	5.62444500461666e-89
22214000	22216000	AT5G54670	NA	Chr5	22209471	22214134	0.682243	0.71258	22192000	22194000	AT5G54630	Chr5	22192498	22194308	0.766326	0.73471	yes	1100	interaction395731	5-22214000	+	546	5-22192000	+	918	21609	11	0.069862	-18.499708	7.3e-05	6	0.069862	600	-7.438115	1056	1359	-2.48488	500	500	6	-1.03332	0.00158804730080323	6.79613	1.49912419554343e-201
28480000	28482000	AT1G75850	NA	Chr1	28477767	28483928	0.807817	0.749454	28466000	28468000	AT1G75820	Chr1	28463461	28466971	0.723926	0.796043	NA	1100	interaction96078	1-28480000	+	1388	1-28466000	+	717	13876	11	0.069862	-18.479607	7.4e-05	6	0.069862	600	-7.437662	1968	1107	-2.48455	500	500	6	-0.368963	1.53869952140117e-05	0.4959	3.75319746133699e-06
24058000	24060000	AT5G59710	NA	Chr5	24057406	24061918	0.870061	0.75097	24046000	24048000	AT5G59680	Chr5	24046791	24050801	0.5242	0.61708	NA	1100	interaction401770	5-24058000	+	824	5-24046000	+	807	11798	11	0.069862	-18.472467	7.4e-05	6	0.069862	600	-7.43617	1497	1317	-2.48348	500	500	6	0.353864	0.000306372031080478	-5.00359	5.7167764084034e-13
522000	524000	AT3G02510	NA	Chr3	521745	524631	0.726009	0.692784	496000	498000	AT3G02420	Chr3	495884	498841	0.829584	0.878952	NA	1100	interaction172910	3-522000	+	1658	3-496000	+	922	25542	11	0.069862	-18.465382	7.4e-05	6	0.069862	600	-7.435005	2593	1546	-2.48264	500	500	6	1.17897	1.62473649707217e-28	-0.711568	2.90871880729132e-14
2162000	2164000	AT3G06860	NA	Chr3	2161868	2166349	0.758608	0.682024	2148000	2150000	AT3G06810	Chr3	2146334	2150831	0.781683	0.693567	NA	1100	interaction178361	3-2162000	+	1744	3-2148000	+	1032	14371	11	0.069862	-18.460088	7.4e-05	6	0.069862	600	-7.43468	2506	1625	-2.4824	500	500	6	-0.883159	3.10610602181407e-21	-0.207986	0.00875186115034568
16182000	16184000	AT2G38700	NA	Chr2	16180695	16183946	0.719495	0.69106	16166000	16168000	AT2G38660	Chr2	16165951	16168386	0.735232	0.776694	NA	1100	interaction159385	2-16182000	+	1156	2-16166000	+	953	15789	11	0.069862	-18.463766	7.4e-05	6	0.069862	600	-7.434413	2217	1696	-2.48221	500	500	6	-0.750916	2.40570596244478e-07	-0.372117	0.0242482038634731
1092000	1094000	AT3G04160	yes	Chr3	1091146	1094346	0.983316	0.915232	1070000	1072000	AT3G04080	Chr3	1067789	1071295	0.816141	0.835909	NA	1100	interaction174784	3-1092000	+	1668	3-1070000	+	864	22559	11	0.069862	-18.468719	7.4e-05	6	0.069862	600	-7.434181	2692	1763	-2.48205	500	500	6	0.483896	0.00243206365287192	-0.840832	1.40902396632268e-12
10208000	10210000	AT1G29200	yes	Chr1	10207821	10210622	0.703315	0.758644	10174000	10176000	AT1G29120	Chr1	10174186	10178521	0.863992	0.822882	yes	1000	interaction35748	1-10208000	+	1572	1-10174000	+	1116	34088	10	0.069862	-16.042632	0.000763	6	0.07284	575.469114	-7.433261	2777	2091	-2.48138	424.530886	424.531	6	-1.57029	1.18990163558384e-05	0.661774	1.42061038381153e-11
3272000	3274000	AT3G10500	NA	Chr3	3271489	3274030	0.748565	0.782836	3240000	3242000	AT3G10420	Chr3	3239179	3242537	0.730906	0.652518	NA	1100	interaction182491	3-3272000	+	1428	3-3240000	+	1905	32242	11	0.069862	-18.447803	7.4e-05	10	0.10301	678.203775	-16.024513	2496	3290	-2.46497	421.796225	421.796	6	-3.05035	1.67206982609385e-51	2.34309	6.79219784901263e-32
25282000	25284000	AT1G67490	NA	Chr1	25280450	25286611	0.83187	0.719043	25270000	25272000	AT1G67460	Chr1	25269625	25271861	0.956297	0.828667	yes	2700	interaction85493	1-25282000	+	1349	1-25270000	+	1609	12034	27	0.069862	-65.764193	0	27	0.093209	2023.697471	-65.656349	2418	3073	-2.46103	676.302529	676.303	24	-0.290304	0.044353926516349	0.867474	0.0300367359667032
24060000	24062000	AT5G59710	NA	Chr5	24057406	24061918	0.870061	0.75097	24048000	24050000	AT5G59680	Chr5	24046791	24050801	0.5242	0.61708	NA	2500	interaction401781	5-24060000	+	1582	5-24048000	+	2120	11871	25	0.069862	-59.140178	0	27	0.101966	1849.901876	-65.655957	2425	3352	-2.45932	650.098124	650.098	22	0.353864	0.000306372031080478	-5.00359	5.7167764084034e-13
5608000	5610000	AT1G16410	yes	Chr1	5608806	5611426	3.00237	3.53296	5578000	5580000	AT1G16310	Chr1	5578430	5580693	0.897845	0.938485	yes	900	interaction19690	1-5608000	+	1702	1-5578000	+	991	29288	9	0.069862	-13.726286	0.007132	6	0.080088	523.389214	-7.433848	3416	1869	-2.45248	376.610786	376.611	4	5.31924	8.47256719614396e-108	-1.93327	2.01648822361325e-21
7430000	7432000	AT2G17070	yes	Chr2	7430862	7431654	1.69628	2.27182	7412000	7414000	AT2G17050	Chr2	7410834	7415610	1.22574	1.35067	yes	2453.852749	interaction128847	2-7430000	+	2302	2-7412000	+	2399	18116	40	0.113881	-111.620013	0	42	0.150687	1947.221923	-118.987815	3441	3491	-2.4421	506.630826	506.631	40	-4.88323	1.07405052041308e-12	-3.20113	7.70293225548829e-19
522000	524000	AT2G02090	yes	Chr2	523283	527012	0.810784	0.837714	518000	520000	AT2G02080	Chr2	518158	521707	3.17348	4.95858	yes	3100	interaction103724	2-522000	+	619	2-518000	+	616	3935	31	0.069862	-79.780171	0	23	0.069862	2300	-52.86682	965	773	-2.42725	800	800	28	-0.351952	0.00502047606133363	3.21409	5.24490371773112e-175
10720000	10722000	AT2G25170	NA	Chr2	10713806	10723986	0.814607	0.731178	10698000	10700000	AT2G25140	Chr2	10697702	10702152	0.686317	0.716852	yes	1557.131477	interaction140133	2-10720000	+	1933	2-10698000	+	2026	21948	18	0.080759	-37.412354	0	17	0.108986	1089.727583	-34.491065	2809	3093	-2.41655	467.403895	467.404	14	0.509542	0.00905829422291053	-0.888456	5.7815581793991e-16
7052000	7054000	AT2G16280	NA	Chr2	7050943	7052897	0.709913	0.742841	7044000	7046000	AT2G16270	Chr2	7045537	7048326	0.641062	0.5399	NA	3100	interaction127502	2-7052000	+	804	2-7044000	+	975	7356	31	0.069862	-79.609564	0	23	0.069862	2300	-52.765137	1160	1484	-2.41497	800	800	28	1.79867	3.51715682210387e-14	1.0488	2.65164259627428e-06
20448000	20450000	AT3G55160	NA	Chr3	20445411	20452400	0.659661	0.607055	20434000	20436000	AT3G55130	Chr3	20433877	20436390	3.19462	4.2781	yes	2229.600979	interaction244663	3-20448000	+	1637	3-20434000	+	2599	13745	28	0.087735	-69.070693	0	34	0.140468	1691.001916	-89.752486	2646	4232	-2.403	538.599063	538.599	24	-0.555484	0.0488099497378342	5.86438	7.5614483398405e-129
4406000	4408000	AT3G13510	NA	Chr3	4403499	4406091	0.65209	0.581222	4396000	4398000	AT3G13490	Chr3	4395724	4399325	0.918865	0.765179	NA	1700	interaction186620	3-4406000	+	542	3-4396000	+	1584	9511	17	0.069862	-34.672865	0	11	0.069862	1100	-18.468172	873	2573	-2.39414	600	600	12	0.578993	0.0171519168884789	1.64974	3.19682035578309e-26
23834000	23836000	AT5G59030	yes	Chr5	23833727	23834511	1.06369	4.5235	23830000	23832000	AT5G59020	Chr5	23826974	23830437	0.647927	0.650413	NA	1700	interaction401020	5-23834000	+	624	5-23830000	+	578	3662	17	0.069862	-34.658714	0	11	0.069862	1100	-18.466427	903	987	-2.39364	600	600	12	3.85757	1.29340007416279e-132	-0.599066	0.000947026649769804
4878000	4880000	AT1G14280	NA	Chr1	4877626	4879149	0.746647	0.673055	4870000	4872000	AT1G14250	Chr1	4868451	4871488	1.32091	2.09904	yes	1700	interaction17099	1-4878000	+	1089	1-4870000	+	951	7933	17	0.069862	-34.575565	0	11	0.069862	1100	-18.448097	1415	1583	-2.38845	600	600	12	5.45426	1.5121104253871e-153	7.67331	7.83181283063189e-50
18844000	18846000	AT5G46470	NA	Chr5	18842700	18849741	0.82341	0.673445	18830000	18832000	AT5G46420	Chr5	18829954	18832953	0.788008	0.78436	NA	1700	interaction384576	5-18844000	+	1282	5-18830000	+	1485	13974	17	0.069862	-34.542494	0	11	0.069862	1100	-18.442026	1743	2182	-2.38674	600	600	12	0.726949	0.00168750164222977	2.58735	8.29590489917502e-145
18048000	18050000	AT5G44740	NA	Chr5	18047783	18051879	0.656776	0.627514	18036000	18038000	AT5G44700	Chr5	18032863	18036894	0.61373	0.681932	NA	1700	interaction381827	5-18048000	+	1292	5-18036000	+	938	11786	17	0.069862	-34.577343	0	11	0.069862	1100	-18.441715	1980	1764	-2.38666	600	600	12	1.22268	5.96530099269967e-08	-3.35799	5.24092082899956e-26
6100000	6102000	AT5G18410	NA	Chr5	6097270	6105031	0.768629	0.68043	6080000	6082000	AT5G18360	Chr5	6080048	6083027	0.690442	0.586936	NA	1500	interaction341078	5-6100000	+	1818	5-6080000	+	1800	20359	15	0.069862	-28.88594	0	15	0.103277	1014.68118	-28.868183	2760	2983	-2.38621	485.31882	485.319	10	0.324768	0.00386043419092279	-1.15391	6.20833154414671e-09
15332000	15334000	AT4G31650	NA	Chr4	15331139	15333321	0.57288	0.559719	15304000	15306000	AT4G31570	Chr4	15297013	15306410	0.750304	0.680832	NA	1300	interaction309482	4-15332000	+	1577	4-15304000	+	1853	28156	13	0.069862	-23.520689	1e-06	11	0.09102	844.298878	-18.434381	2463	2946	-2.38459	455.701122	455.701	8	1.21901	1.54273012440791e-08	-0.458193	0.00163032084316191
134000	136000	AT5G01330	yes	Chr5	132318	134862	1.03489	1.51716	130000	132000	AT5G01320	Chr5	129301	131625	0.840539	1.13073	yes	12600	interaction320385	5-134000	+	1775	5-130000	+	1784	3968	126	0.069862	-492.176235	0	206	0.12872	11180.511319	-902.934227	3269	3139	-2.38304	1419.488681	1419.49	184	-5.24585	4.98964324439834e-41	1.34542	0.000315282590167463
4450000	4452000	AT1G13050	NA	Chr1	4450237	4451742	0.607157	0.595429	4448000	4450000	AT1G13040	Chr1	4447646	4449200	0.744425	0.55535	NA	31900	interaction15758	1-4450000	+	1409	1-4448000	+	2356	1931	319	0.069862	-1563.735109	0	519	0.121609	29815.474712	-2790.569076	2420	4006	-2.37454	2084.525288	2084.53	586	-0.677153	0.00382241411866452	-0.54745	0.0361487755970943
1440000	1442000	AT1G05030	NA	Chr1	1438151	1441417	0.781845	0.671465	1434000	1436000	AT1G05020	Chr1	1435253	1437667	0.642188	0.940075	NA	4100	interaction4857	1-1440000	+	1042	1-1434000	+	1076	5233	41	0.069862	-115.769525	0	32	0.069862	3200	-82.829899	1549	1601	-2.37162	900	900	42	1.24399	1.84378792935245e-22	3.41185	8.40879852513362e-17
1622000	1624000	AT1G05490	NA	Chr1	1618601	1623452	0.53083	0.531056	1602000	1604000	AT1G05460	Chr1	1601147	1605027	0.771679	0.668001	yes	2300	interaction5401	1-1622000	+	1135	1-1602000	+	2542	19807	23	0.069862	-52.769595	0	23	0.094627	1698.071932	-52.681453	1982	3806	-2.36874	601.928068	601.928	18	0.702647	0.0496119892926467	0.840479	2.2223853842024e-05
16044000	16046000	AT5G40100	NA	Chr5	16043928	16047355	0.568966	0.622943	16034000	16036000	AT5G40060	Chr5	16034575	16039096	0.801428	0.89064	NA	4100	interaction375438	5-16044000	+	1776	5-16034000	+	1393	9523	41	0.069862	-115.576191	0	32	0.069862	3200	-82.778982	2505	1860	-2.36753	900	900	42	-2.58999	1.18678703549108e-28	2.2706	2.80021801743581e-41
2238000	2240000	AT3G07070	NA	Chr3	2237957	2240074	0.68508	0.683197	2202000	2204000	AT3G06980	Chr3	2201466	2204833	0.811243	0.687435	yes	900	interaction178645	3-2238000	+	1276	3-2202000	+	1586	36599	9	0.069862	-13.71985	0.007132	6	0.078615	533.199171	-7.432638	2392	2620	-2.36727	366.800829	366.801	4	-5.44094	3.5404283874614e-24	2.60585	4.09989101966029e-89
11942000	11944000	AT1G32950	NA	Chr1	11941437	11944760	0.545383	0.573327	11922000	11924000	AT1G32900	Chr1	11920389	11923766	0.633711	0.693184	NA	2300	interaction41444	1-11942000	+	2355	1-11922000	+	1182	20272	23	0.069862	-52.761371	0	17	0.072572	1636.515188	-34.522677	3569	1621	-2.36305	663.484812	663.485	18	-2.48354	1.3960087819152e-09	5.50165	5.50154724811729e-71
8604000	8606000	AT2G19920	NA	Chr2	8602221	8606887	0.611345	0.790077	8592000	8594000	AT2G19900	Chr2	8591898	8595478	0.571321	0.793736	NA	2400	interaction132834	2-8604000	+	1486	2-8592000	+	1592	12234	24	0.069862	-55.915519	0	17	0.069862	1700	-34.507283	2041	2153	-2.36056	700	700	20	4.37394	9.60249418790977e-31	-2.69316	0.000225244284634678
3570000	3572000	AT3G11390	yes	Chr3	3569827	3571960	1.96134	3.00245	3546000	3548000	AT3G11320	Chr3	3546645	3548856	0.81195	0.757729	NA	900	interaction183614	3-3570000	+	2221	3-3546000	+	961	23658	9	0.069862	-13.727187	0.007132	8	0.104424	535.219897	-11.499486	4347	1915	-2.35189	364.780103	364.78	4	-2.11196	7.47385255465368e-05	-1.85341	8.23794087081761e-49
10206000	10208000	AT4G18490	NA	Chr4	10203597	10208197	0.598755	0.601918	10198000	10200000	AT4G18465	Chr4	10197055	10201611	0.731429	0.682023	NA	6000	interaction291451	4-10206000	+	2171	4-10198000	+	1527	8052	60	0.069862	-190.747806	0	70	0.097284	5026.889458	-232.40458	3206	2419	-2.34854	973.110542	973.111	70	0.857868	0.00413577693739698	-0.271551	0.0339138032585768
23852000	23854000	AT5G59090	yes	Chr5	23851904	23855275	1.60774	1.25195	23848000	23850000	AT5G59080	Chr5	23847404	23848557	0.766501	0.615691	NA	4200	interaction401068	5-23852000	+	991	5-23848000	+	858	4517	42	0.069862	-119.721184	0	33	0.069862	3300	-86.44238	1896	1200	-2.34606	900	900	44	-5.31788	1.87316330636941e-68	2.52157	1.27161978537156e-26
11992000	11994000	AT4G22840	NA	Chr4	11991496	11993770	0.657104	0.720655	11984000	11986000	AT4G22810	Chr4	11984139	11985702	4.54574	3.8403	yes	3700	interaction297235	4-11992000	+	1044	4-11984000	+	1409	8153	37	0.069862	-100.915414	0	33	0.078922	2921.167208	-86.303167	1794	3507	-2.33545	778.832792	778.833	36	-1.51296	3.17758006354667e-07	-5.41664	1.12726789762446e-28
24966000	24968000	AT1G66920	yes	Chr1	24965303	24967522	0.736714	1.02584	24956000	24958000	AT1G66890	Chr1	24957557	24958114	0.682975	0.777735	NA	1200	interaction84198	1-24966000	+	523	1-24956000	+	849	9894	12	0.069862	-21.014522	6e-06	7	0.069862	700	-9.414306	750	1359	-2.32768	500	500	6	4.75331	9.20572111395409e-46	1.63768	1.48568452820475e-08
3448000	3450000	AT5G10940	NA	Chr5	3448635	3454252	0.914131	0.86481	3436000	3438000	AT5G10900	Chr5	3435948	3439297	0.645844	0.634007	NA	1200	interaction331807	5-3448000	+	461	5-3436000	+	923	12072	12	0.069862	-21.029036	6e-06	7	0.069862	700	-9.411183	884	1571	-2.32612	500	500	6	0.353342	1.50466118117699e-06	0.391536	0.0081413291975232
28246000	28248000	AT1G75260	NA	Chr1	28247808	28249441	0.601627	0.752031	28240000	28242000	AT1G75240	Chr1	28241071	28242756	1.24679	5.62848	yes	3300	interaction95432	1-28246000	+	837	1-28240000	+	1033	5461	33	0.069862	-86.626098	0	25	0.069862	2500	-59.198898	1435	1188	-2.32551	800	800	32	-0.93303	0.01057399746198	6.95089	2.13673226032525e-164
18116000	18118000	AT5G44870	yes	Chr5	18114665	18118608	1.0797	2.24754	18096000	18098000	AT5G44820	Chr5	18095712	18097585	1.02706	1.04071	NA	1200	interaction382037	5-18116000	+	1521	5-18096000	+	496	20004	12	0.069862	-21.020393	6e-06	7	0.069862	700	-9.409767	2105	962	-2.32541	500	500	6	2.20358	3.54236705501637e-34	-2.45261	2.82743853108289e-08
18312000	18314000	AT1G49475	yes	Chr1	18312919	18314016	1.41619	0.916334	18290000	18292000	AT1G49430	Chr1	18291042	18295825	1.67355	1.89254	yes	1200	interaction61427	1-18312000	+	640	1-18290000	+	555	21699	12	0.069862	-21.00831	6e-06	7	0.069862	700	-9.409602	1235	972	-2.32533	500	500	6	-2.49528	5.3093142635555e-06	0.781004	0.000535511767299244
3596000	3598000	AT1G10790	NA	Chr1	3596359	3597847	0.67013	0.702572	3582000	3584000	AT1G10760	Chr1	3581033	3590928	0.822125	0.619193	NA	1200	interaction12803	1-3596000	+	1622	1-3582000	+	714	13563	12	0.069862	-20.985754	7e-06	7	0.069862	700	-9.408795	2644	1024	-2.32493	500	500	6	-1.97251	0.00140698634808183	1.75451	2.63900408842521e-21
8438000	8440000	AT3G23530	NA	Chr3	8436670	8442846	0.654791	0.662203	8420000	8422000	AT3G23480	Chr3	8418800	8422916	0.888	0.876028	NA	1200	interaction200763	3-8438000	+	931	3-8420000	+	751	17838	12	0.069862	-20.981883	7e-06	7	0.069862	700	-9.407603	1405	1112	-2.32434	500	500	6	1.69133	5.59029699729605e-08	7.36785	1.79091746014861e-66
19334000	19336000	AT1G52000	yes	Chr1	19333158	19336115	0.947731	1.79682	19322000	19324000	AT1G51980	Chr1	19323381	19326916	0.931572	0.845805	yes	1200	interaction65116	1-19334000	+	917	1-19322000	+	758	12078	12	0.069862	-20.981194	7e-06	7	0.069862	700	-9.407203	1145	1315	-2.32414	500	500	6	7.69951	1.24385322926244e-111	-0.690169	9.84925615766409e-20
23872000	23874000	AT5G59130	yes	Chr5	23870097	23873720	1.00144	1.25042	23848000	23850000	AT5G59080	Chr5	23847404	23848557	0.766501	0.615691	NA	1200	interaction401152	5-23872000	+	1798	5-23848000	+	858	24296	12	0.069862	-20.972578	7e-06	7	0.069862	700	-9.406586	2957	1200	-2.32383	500	500	6	6.55007	3.24975647582761e-25	2.52157	1.27161978537156e-26
21182000	21184000	AT1G56540	yes	Chr1	21181663	21185306	1.80802	2.36257	21164000	21166000	AT1G56500	Chr1	21159743	21167321	0.857098	0.765229	NA	1200	interaction71199	1-21182000	+	1020	1-21164000	+	1317	17874	12	0.069862	-20.962221	7e-06	7	0.069862	700	-9.404551	1426	1474	-2.32282	500	500	6	0.944678	1.14056757780877e-05	4.0111	3.33265162847515e-131
2314000	2316000	AT1G07530	NA	Chr1	2313581	2316469	0.754846	0.720769	2288000	2290000	AT1G07450	Chr1	2287925	2289336	0.693056	0.846537	yes	1200	interaction8180	1-2314000	+	1910	1-2288000	+	1113	25599	12	0.069862	-20.957643	7e-06	7	0.069862	700	-9.404357	3120	1452	-2.32273	500	500	6	-0.427403	0.0363443999366789	4.50015	2.00119776342325e-09
17940000	17942000	AT1G48520	NA	Chr1	17940087	17942822	0.793231	0.700451	17926000	17928000	AT1G48490	Chr1	17921934	17928930	0.780198	0.729715	NA	1200	interaction60123	1-17940000	+	1053	1-17926000	+	1515	14137	12	0.069862	-20.960504	7e-06	7	0.069862	700	-9.403311	1611	2324	-2.32221	500	500	6	2.84301	1.62160052464376e-148	-0.806554	1.96060413154423e-10
13252000	13254000	AT2G31083	yes	Chr2	13252218	13252765	4.37279	5.72232	13222000	13224000	AT2G31070	Chr2	13220477	13222609	1.37473	4.19213	yes	1200	interaction148900	2-13252000	+	878	2-13222000	+	1291	29768	12	0.069862	-20.971091	7e-06	7	0.069862	700	-9.403006	1730	1664	-2.32206	500	500	6	-6.24796	1.0301155136567e-31	3.71341	2.38652782812119e-60
6070000	6072000	AT1G17650	NA	Chr1	6069476	6072012	0.73101	0.607213	6044000	6046000	AT1G17580	Chr1	6039302	6049556	0.781924	0.676528	NA	1200	interaction21459	1-6070000	+	1133	1-6044000	+	1510	26038	12	0.069862	-20.956758	7e-06	7	0.069862	700	-9.402902	1683	2107	-2.322	500	500	6	3.34228	5.0967583599559e-113	0.699362	2.07613777888484e-05
21334000	21336000	AT3G57610	NA	Chr3	21334283	21336674	0.774245	0.812399	21330000	21332000	AT3G57590	Chr3	21330181	21331396	0.790267	0.799525	NA	7947.429717	interaction247669	3-21334000	+	2767	3-21330000	+	1556	4092	101	0.088784	-372.598395	0	143	0.143327	6970.265823	-574.974159	4361	2620	-2.3219	977.163894	977.164	138	0.584613	1.96657031447432e-05	0.407374	0.0227000621625844
23186000	23188000	AT1G62630	yes	Chr1	23185911	23188593	1.04189	1.79802	23160000	23162000	AT1G62560	Chr1	23159822	23162649	1.92657	1.50322	yes	1200	interaction77849	1-23186000	+	1395	1-23160000	+	1281	26278	12	0.069862	-20.951065	7e-06	7	0.069862	700	-9.40169	1940	2233	-2.3214	500	500	6	6.50703	8.79148009558379e-52	3.92646	7.2850452207202e-37
14410000	14412000	AT4G29230	yes	Chr4	14410337	14414956	4.23772	3.64535	14388000	14390000	AT4G29180	Chr4	14385592	14389689	0.719845	0.715753	NA	1200	interaction306255	4-14410000	+	868	4-14388000	+	1805	22388	12	0.069862	-20.971826	7e-06	7	0.069903	699.585332	-9.401553	1974	2823	-2.32133	500.414668	500.415	6	-1.66421	8.18770542506471e-12	-5.28886	4.23102470469114e-41
30098000	30100000	AT1G80010	NA	Chr1	30097400	30099846	0.626177	0.606035	30066000	30068000	AT1G79930	Chr1	30063475	30067547	0.712537	0.599945	NA	900	interaction101157	1-30098000	+	2095	1-30066000	+	1337	32232	9	0.069862	-13.71883	0.007132	7	0.091333	535.44277	-9.400737	3302	2205	-2.32093	364.55723	364.557	4	-0.390018	0.0133412489164081	-0.65584	2.98004475553115e-05
21982000	21984000	AT3G59480	yes	Chr3	21983020	21984598	0.760092	0.802855	21956000	21958000	AT3G59410	Chr3	21950187	21959266	0.659878	0.594615	NA	900	interaction250360	3-21982000	+	1279	3-21956000	+	2125	26556	9	0.069862	-13.719797	0.007132	7	0.091715	533.21169	-9.400104	2425	3015	-2.32062	366.78831	366.788	4	-4.15429	3.4929230752573e-38	0.623349	7.84369318214983e-11
23286000	23288000	AT5G57500	yes	Chr5	23286236	23287571	1.23225	1.50785	23282000	23284000	AT5G57490	Chr5	23283679	23285934	0.834293	0.817523	NA	2500	interaction399097	5-23286000	+	673	5-23282000	+	540	3884	25	0.069862	-59.484962	0	18	0.069862	1800	-37.506615	1252	833	-2.31547	700	700	22	-1.7604	1.34630880618025e-06	-0.326829	0.0119950681115848
3976000	3978000	AT5G12290	NA	Chr5	3974170	3978160	0.804557	0.786955	3972000	3974000	AT5G12280	Chr5	3971799	3973644	1.44835	1.11124	yes	16600	interaction333590	5-3976000	+	1602	5-3972000	+	2043	4034	166	0.069862	-695.815973	0	317	0.147259	15038.97836	-1530.308064	3046	3854	-2.3114	1561.02164	1561.02	260	-0.488363	4.53506404809942e-06	-2.69259	2.13050769814757e-09
11306000	11308000	AT2G26580	yes	Chr2	11303589	11306953	4.03321	5.56452	11298000	11300000	AT2G26570	Chr2	11299143	11302191	0.934557	0.866033	NA	1800	interaction142075	2-11306000	+	619	2-11298000	+	459	7446	18	0.069862	-37.64307	0	12	0.069862	1200	-20.985754	920	714	-2.30809	600	600	14	8.68214	6.90640164683259e-59	0.395293	0.00243059542518882
8218000	8220000	AT5G24210	yes	Chr5	8217334	8219619	2.3401	4.24263	8210000	8212000	AT5G24205	Chr5	8210821	8213086	1.83307	2.89575	yes	1800	interaction348368	5-8218000	+	1486	5-8210000	+	534	7568	18	0.069862	-37.600193	0	12	0.069862	1200	-20.985207	2098	719	-2.30796	600	600	14	7.03964	1.30803500995815e-81	5.32064	1.66503702821531e-13
5532000	5534000	AT1G16150	NA	Chr1	5532414	5534877	0.550673	0.561593	5522000	5524000	AT1G16120	Chr1	5522638	5524983	0.51348	0.532461	NA	2941.730977	interaction19352	1-5532000	+	2115	1-5522000	+	1688	10112	31	0.073621	-79.320153	0	40	0.122044	2289.72802	-111.543108	3228	3014	-2.30621	652.002957	652.003	28	-2.3512	2.91053217266538e-08	-5.37175	7.40946896312802e-23
6920000	6922000	AT4G11380	NA	Chr4	6920488	6925969	0.743678	0.688482	6892000	6894000	AT4G11330	Chr4	6892054	6894149	0.879456	0.78899	yes	2500	interaction280239	4-6920000	+	1210	4-6892000	+	1565	27984	25	0.069862	-59.194604	0	18	0.069862	1800	-37.413703	1897	2446	-2.30192	700	700	22	-0.378213	6.51874466855405e-07	1.11326	0.000129656043165397
4346000	4348000	AT5G13530	NA	Chr5	4345525	4354551	0.738737	0.697709	4338000	4340000	AT5G13500	Chr5	4338154	4341003	0.757575	0.661412	NA	4300	interaction334881	5-4346000	+	1694	5-4338000	+	1476	7701	43	0.069862	-123.099708	0	34	0.069862	3400	-89.805918	2473	2092	-2.30123	900	900	46	-0.300733	0.00363645703745587	-0.890222	8.66756747618576e-30
2076000	2078000	AT3G06640	NA	Chr3	2074188	2078317	0.53491	0.516312	2064000	2066000	AT3G06620	Chr3	2062205	2067416	0.838036	0.677329	NA	3508.271943	interaction178051	3-2076000	+	2822	3-2064000	+	1403	12502	41	0.081645	-115.572115	0	56	0.138032	2834.327086	-173.91999	4300	2559	-2.29655	673.944857	673.945	42	2.2149	2.99425924385214e-09	-0.383701	0.00341491988438439
17736000	17738000	AT2G42600	yes	Chr2	17734323	17739085	0.738617	0.662202	17728000	17730000	AT2G42580	Chr2	17728714	17731718	0.830638	0.696423	NA	3400	interaction164767	2-17736000	+	1465	2-17728000	+	1129	7352	34	0.069862	-90.024927	0	26	0.069862	2600	-62.39974	2204	1719	-2.27794	800	800	32	3.50497	1.44582966782773e-57	1.46886	3.67538541984551e-10
4006000	4008000	AT5G12370	NA	Chr5	4002774	4008804	1.09005	0.989963	3974000	3976000	AT5G12290	Chr5	3974170	3978160	0.804557	0.786955	NA	1026.957072	interaction333700	5-4006000	+	2972	5-3974000	+	1776	32295	16	0.108845	-31.671011	0	18	0.175555	716.308795	-37.38711	4665	3000	-2.27715	310.648277	310.648	10	0.480932	2.20074806251269e-06	-0.488363	4.53506404809942e-06
12506000	12508000	AT2G29110	yes	Chr2	12506879	12510552	2.10031	2.2937	12496000	12498000	AT2G29090	Chr2	12494850	12499723	1.91476	3.36225	yes	2600	interaction146119	2-12506000	+	1601	2-12496000	+	1318	10646	26	0.069862	-62.45358	0	19	0.069862	1900	-40.379134	2241	1704	-2.24899	700	700	22	-2.08381	0.0123179555707828	5.60489	3.66061741036352e-23
2450000	2452000	AT5G07700	yes	Chr5	2450324	2451578	2.08083	2.67117	2426000	2428000	AT5G07660	Chr5	2422838	2429912	0.646146	0.607616	NA	2500	interaction328449	5-2450000	+	2076	5-2426000	+	1073	24281	25	0.069862	-59.224236	0	19	0.072311	1835.661667	-40.372885	3150	1830	-2.24818	664.338333	664.338	22	5.3448	4.51174554115452e-15	1.17414	0.000102932782758489
5260000	5262000	AT1G15290	NA	Chr1	5257045	5264942	0.790361	0.644168	5246000	5248000	AT1G15240	Chr1	5243449	5248604	0.769633	0.676203	NA	2300	interaction18333	1-5260000	+	1733	1-5246000	+	1527	13599	23	0.069862	-52.716581	0	19	0.077306	1717.052355	-40.350967	2493	2472	-2.24533	582.947645	582.948	18	3.524	1.28436183775593e-38	0.392317	0.0165111911145267
18764000	18766000	AT3G50560	yes	Chr3	18761087	18764016	1.26385	1.37482	18754000	18756000	AT3G50530	Chr3	18753540	18756773	0.724884	0.694487	NA	1900	interaction238849	3-18764000	+	502	3-18754000	+	1646	10442	19	0.069862	-40.598618	0	13	0.069862	1300	-23.5774	676	2749	-2.2312	600	600	14	3.44423	1.08129524298478e-13	0.396044	1.93582009351432e-05
2862000	2864000	AT3G09320	yes	Chr3	2861742	2864245	0.79849	0.728019	2858000	2860000	AT3G09300	Chr3	2857846	2860668	0.764583	0.751524	NA	8600	interaction180899	3-2862000	+	947	3-2858000	+	1249	3966	86	0.069862	-305.101356	0	74	0.069862	7400	-250.183363	1644	2069	-2.23051	1200	1200	114	-0.71132	9.9965704103418e-07	-0.548387	4.03378208287599e-07
21418000	21420000	AT3G57830	NA	Chr3	21419516	21422546	0.666999	0.635511	21414000	21416000	AT3G57810	Chr3	21415783	21417948	0.783564	0.721079	yes	1900	interaction248037	3-21418000	+	652	3-21414000	+	664	3843	19	0.069862	-40.526563	0	13	0.069862	1300	-23.556018	1041	861	-2.2269	600	600	14	1.4437	1.53934966924452e-12	1.40968	3.15679423440062e-32
13822000	13824000	AT2G32550	yes	Chr2	13819378	13822839	1.7415	2.14763	13808000	13810000	AT2G32530	Chr2	13809215	13813570	1.8517	3.00769	yes	1900	interaction150851	2-13822000	+	871	2-13808000	+	603	13594	19	0.069862	-40.546112	0	13	0.069862	1300	-23.55477	1371	875	-2.22665	600	600	14	1.07431	0.0199094978608395	4.52586	1.33096331551956e-66
23834000	23836000	AT5G59030	yes	Chr5	23833727	23834511	1.06369	4.5235	23826000	23828000	AT5G59020	Chr5	23826974	23830437	0.647927	0.650413	NA	1900	interaction401018	5-23834000	+	624	5-23826000	+	1073	7353	19	0.069862	-40.537354	0	13	0.069862	1300	-23.55239	903	1690	-2.22618	600	600	14	3.85757	1.29340007416279e-132	-0.599066	0.000947026649769804
21382000	21384000	AT3G57680	NA	Chr3	21381053	21383629	0.729866	0.782732	21372000	21374000	AT3G57670	Chr3	21370902	21373446	4.58597	5.16028	yes	4500	interaction247877	3-21382000	+	2300	3-21372000	+	1443	9925	45	0.069862	-130.765028	0	57	0.10765	3699.160892	-177.973142	3288	2610	-2.22352	800.839108	800.839	48	5.66192	2.83336553352961e-14	0.530582	0.0182271948780159
20434000	20436000	AT3G55130	yes	Chr3	20433877	20436390	3.19462	4.2781	20416000	20418000	AT3G55090	Chr3	20416341	20418552	1.00535	1.34854	yes	1817.512948	interaction244587	3-20434000	+	2599	3-20416000	+	1793	17817	25	0.096096	-59.119395	0	31	0.156447	1384.320277	-79.208818	4232	2947	-2.22167	433.192671	433.193	22	5.86438	7.5614483398405e-129	-1.68221	1.18814474791484e-06
9826000	9828000	AT5G27740	NA	Chr5	9823678	9827064	0.787796	0.624223	9820000	9822000	AT5G27730	Chr5	9820248	9823086	0.718192	0.663798	NA	1300	interaction353807	5-9826000	+	194	5-9820000	+	772	5764	13	0.069862	-23.829579	0	8	0.069862	800	-11.573478	254	1311	-2.22146	500	500	8	0.462141	8.06413838527102e-07	0.91984	0.000581137025307056
11260000	11262000	AT2G26470	NA	Chr2	11259152	11262494	0.706371	0.6826	11248000	11250000	AT2G26440	Chr2	11247382	11249493	1.01354	1.52317	yes	1900	interaction141954	2-11260000	+	1200	2-11248000	+	946	12173	19	0.069862	-40.452106	0	13	0.069862	1300	-23.522864	1883	1500	-2.22029	600	600	14	0.511916	0.000274811861276597	3.63399	2.2834387943874e-38
4348000	4350000	AT5G13530	NA	Chr5	4345525	4354551	0.738737	0.697709	4336000	4338000	AT5G13490	Chr5	4335466	4337680	0.546778	0.598962	NA	1700	interaction334892	5-4348000	+	2212	5-4336000	+	1051	11649	17	0.069862	-34.563365	0	13	0.075516	1202.668753	-23.519286	3691	1631	-2.21958	497.331247	497.331	12	-0.300733	0.00363645703745587	-0.897806	2.62741992863995e-07
7098000	7100000	AT1G20490	NA	Chr1	7097292	7099695	0.79332	0.774576	7064000	7066000	AT1G20380	Chr1	7061664	7065178	0.849566	0.99411	yes	1700	interaction24913	1-7098000	+	1417	1-7064000	+	1427	34058	17	0.069862	-34.533461	0	13	0.076605	1185.56497	-23.507816	2695	2266	-2.2173	514.43503	514.435	12	-1.05065	7.64734540250074e-08	-0.757441	0.0201247178712915
17518000	17520000	AT1G47640	NA	Chr1	17518188	17520128	0.787182	0.685915	17486000	17488000	AT1G47580	Chr1	17485649	17486463	0.748891	0.761971	NA	1700	interaction58437	1-17518000	+	1605	1-17486000	+	1633	32049	17	0.069862	-34.523423	0	13	0.077365	1173.923522	-23.50544	2502	2465	-2.21683	526.076478	526.076	12	-0.779128	1.45021629453043e-09	2.89665	6.83263109347817e-71
9638000	9640000	AT4G17150	NA	Chr4	9638173	9641756	0.746796	0.713437	9636000	9638000	AT4G17140	Chr4	9613329	9636873	0.762723	0.644741	NA	5900	interaction289647	4-9638000	+	1597	4-9636000	+	628	2117	59	0.069862	-188.238662	0	49	0.069862	4900	-146.568594	2304	1120	-2.21559	1000	1000	70	0.472996	0.0148080805078743	-0.660887	5.65472822055131e-08
18276000	18278000	AT4G39270	NA	Chr4	18276504	18279848	0.642671	0.686643	18274000	18276000	AT4G39260	Chr4	18273898	18275079	0.570583	0.683041	NA	2700	interaction319115	4-18276000	+	909	4-18274000	+	491	2573	27	0.069862	-66.19724	0	20	0.069862	2000	-43.472122	1608	933	-2.20937	700	700	24	-1.67059	2.08810264517765e-26	-1.33886	6.27567466173302e-13
9546000	9548000	AT4G16960	NA	Chr4	9546342	9551007	0.400495	0.414563	9538000	9540000	AT4G16950	Chr4	9538797	9544467	0.398034	0.329196	NA	3600	interaction289313	4-9546000	+	1089	4-9538000	+	1361	8278	36	0.069862	-97.245498	0	28	0.069862	2800	-69.084837	1537	1561	-2.20692	800	800	36	-1.53638	0.000183322470094043	2.61975	7.22284784353196e-50
9960000	9962000	AT3G27020	NA	Chr3	9961318	9964597	0.771999	0.710916	9954000	9956000	AT3G27000	Chr3	9952562	9955941	0.780922	0.79934	NA	2700	interaction205748	3-9960000	+	1016	3-9954000	+	1250	6113	27	0.069862	-65.844586	0	20	0.069862	2000	-43.394576	1600	1983	-2.20018	700	700	24	0.781505	1.13190119143735e-05	-0.737956	1.98825721211129e-08
17376000	17378000	AT4G36880	yes	Chr4	17374457	17376225	0.782614	0.787099	17368000	17370000	AT4G36870	Chr4	17368964	17373930	1.23957	4.01192	yes	1300	interaction316362	4-17376000	+	650	4-17368000	+	552	8287	13	0.069862	-23.599826	1e-06	8	0.069862	800	-11.513216	1172	861	-2.19901	500	500	8	-1.98186	1.79434492032059e-05	3.88858	2.36134279072347e-17
10738000	10740000	AT2G25210	NA	Chr2	10739854	10740552	0.785238	0.789869	10720000	10722000	AT2G25170	Chr2	10713806	10723986	0.814607	0.731178	NA	1300	interaction140206	2-10738000	+	472	2-10720000	+	1933	17882	13	0.069862	-23.620613	1e-06	8	0.069862	800	-11.511288	933	2809	-2.19831	500	500	8	-0.432599	3.03125161766436e-06	0.509542	0.00905829422291053
21538000	21540000	AT3G58160	NA	Chr3	21534796	21541877	0.624178	0.569416	21530000	21532000	AT3G58140	Chr3	21529730	21532572	0.860523	0.753592	NA	1300	interaction248439	3-21538000	+	636	3-21530000	+	966	7882	13	0.069862	-23.583672	1e-06	8	0.069862	800	-11.511165	938	1607	-2.19826	500	500	8	1.97802	5.21665031848044e-09	2.43782	7.79075161812968e-101
5746000	5748000	AT4G08960	NA	Chr4	5746288	5748285	0.775746	0.783521	5726000	5728000	AT4G08920	Chr4	5724102	5727253	0.750044	0.676998	NA	1300	interaction276659	4-5746000	+	922	4-5726000	+	759	20365	13	0.069862	-23.56651	1e-06	8	0.069862	800	-11.508996	1526	1036	-2.19747	500	500	8	-0.357057	0.042405204635784	2.32531	3.88180016477283e-69
464000	466000	AT5G02260	yes	Chr5	463157	465246	1.61757	1.98161	452000	454000	AT5G02240	Chr5	451422	453157	0.775555	0.63649	NA	1300	interaction321469	5-464000	+	655	5-452000	+	1130	11955	13	0.069862	-23.580597	1e-06	8	0.069862	800	-11.506843	1156	1714	-2.19668	500	500	8	-1.51185	2.24663453380276e-38	2.58919	7.09374321605491e-250
454000	456000	AT2G01970	NA	Chr2	451870	454885	0.803832	0.769045	444000	446000	AT2G01950	Chr2	440635	444276	0.69822	0.713239	NA	1300	interaction103542	2-454000	+	700	2-444000	+	696	9655	13	0.069862	-23.574537	1e-06	8	0.069862	800	-11.506811	1261	1158	-2.19667	500	500	8	-0.490886	1.32641003126684e-10	-2.05454	2.63682591736927e-10
17684000	17686000	AT5G43940	NA	Chr5	17684155	17686534	0.805054	0.759345	17664000	17666000	AT5G43900	Chr5	17656893	17667451	0.848248	0.806416	NA	1300	interaction380708	5-17684000	+	1645	5-17664000	+	761	20373	13	0.069862	-23.566277	1e-06	8	0.069862	800	-11.504585	2793	1316	-2.19585	500	500	8	0.431911	0.00051032686697786	-0.288484	0.0138091185379544
8668000	8670000	AT5G25130	yes	Chr5	8668298	8670194	1.1545	2.18246	8648000	8650000	AT5G25100	Chr5	8648005	8651176	0.709998	0.827038	yes	1300	interaction349936	5-8668000	+	944	5-8648000	+	1775	19736	13	0.069862	-23.549162	1e-06	8	0.069862	800	-11.503465	1413	3110	-2.19545	500	500	8	2.71872	4.87217995959606e-14	-0.257566	0.0274886728377645
23648000	23650000	AT1G63740	NA	Chr1	23645428	23648973	0.705754	0.666251	23628000	23630000	AT1G63700	Chr1	23624665	23629112	0.84574	0.707138	yes	1300	interaction79428	1-23648000	+	908	1-23628000	+	1529	20556	13	0.069862	-23.551981	1e-06	8	0.069862	800	-11.502797	1478	2509	-2.1952	500	500	8	-0.361071	0.0109972440689442	0.430874	0.000901994317630334
12982000	12984000	AT2G30470	NA	Chr2	12980506	12985043	0.806573	0.709406	12962000	12964000	AT2G30420	Chr2	12960826	12962162	1.12024	2.00534	yes	1300	interaction148020	2-12982000	+	1055	2-12962000	+	1048	19536	13	0.069862	-23.542112	1e-06	8	0.069862	800	-11.501999	1596	1564	-2.19491	500	500	8	0.543339	1.63316938731647e-07	8.55442	4.63158490837982e-15
2498000	2500000	AT4G04920	yes	Chr4	2497643	2505535	0.660395	0.702013	2478000	2480000	AT4G04890	Chr4	2476488	2482345	2.47839	3.36641	yes	1300	interaction264513	4-2498000	+	1021	4-2478000	+	1562	19810	13	0.069862	-23.543803	1e-06	8	0.069862	800	-11.501098	1674	2397	-2.19458	500	500	8	-0.657397	2.9838677288452e-12	3.71555	2.38230583741627e-36
2502000	2504000	AT4G04920	yes	Chr4	2497643	2505535	0.660395	0.702013	2478000	2480000	AT4G04890	Chr4	2476488	2482345	2.47839	3.36641	yes	1300	interaction264536	4-2502000	+	1204	4-2478000	+	1562	23886	13	0.069862	-23.533829	1e-06	8	0.069862	800	-11.501075	1677	2397	-2.19457	500	500	8	-0.657397	2.9838677288452e-12	3.71555	2.38230583741627e-36
8428000	8430000	AT2G19450	NA	Chr2	8426205	8429736	0.81409	0.754207	8400000	8402000	AT2G19400	Chr2	8399156	8402601	0.689296	0.642257	NA	1300	interaction132289	2-8428000	+	1162	2-8400000	+	1622	27831	13	0.069862	-23.535839	1e-06	8	0.069862	800	-11.499993	1832	2540	-2.19418	500	500	8	-1.5088	3.006984251951e-15	3.19378	3.78875682077421e-27
8002000	8004000	AT4G13800	NA	Chr4	8001861	8004139	0.695881	0.738292	7970000	7972000	AT4G13730	Chr4	7970199	7974248	0.82626	0.817503	NA	1300	interaction283758	4-8002000	+	1960	4-7970000	+	1072	31572	13	0.069862	-23.54068	1e-06	8	0.069862	800	-11.499201	2489	1965	-2.19389	500	500	8	6.71554	1.10161102834725e-17	0.358693	0.00338387058094098
21414000	21416000	AT1G57820	yes	Chr1	21414169	21417946	0.890914	1.0197	21372000	21374000	AT1G57700	Chr1	21370682	21374080	0.794522	0.701191	NA	1100	interaction71807	1-21414000	+	2012	1-21372000	+	1382	41728	11	0.069862	-18.448867	7.4e-05	8	0.081396	686.639775	-11.497411	2760	2351	-2.19324	413.360225	413.36	6	0.506588	0.0112752384479562	-0.444505	0.0235058271299099
20244000	20246000	AT5G49810	yes	Chr5	20239342	20246380	0.876764	0.724143	20222000	20224000	AT5G49770	Chr5	20222668	20227267	2.25492	3.04487	yes	1100	interaction389292	5-20244000	+	1805	5-20222000	+	1371	22042	11	0.069862	-18.449133	7.4e-05	8	0.078109	715.532064	-11.497327	2624	2373	-2.19321	384.467936	384.468	6	-0.875383	1.46524939215444e-26	-5.34104	1.2767702966006e-56
21472000	21474000	AT1G58037	yes	Chr1	21472964	21474602	1.68892	2.58562	21416000	21418000	AT1G57820	Chr1	21414169	21417946	0.890914	1.0197	yes	719.325576	interaction72073	1-21472000	+	1574	1-21416000	+	2693	56048	9	0.087409	-13.715618	0.007132	8	0.126326	442.422119	-11.496717	2545	3957	-2.19299	276.903457	276.903	4	-5.0852	2.09477642777649e-18	0.506588	0.0112752384479562
8782000	8784000	AT3G24240	yes	Chr3	8780423	8784368	0.866185	0.687559	8754000	8756000	AT3G24210	Chr3	8753473	8756065	0.615913	0.631324	yes	1800	interaction201953	3-8782000	+	2313	3-8754000	+	1256	27790	18	0.069862	-37.450727	0	23	0.122921	1307.207272	-52.669501	4442	2206	-2.1763	492.792728	492.793	14	-5.48013	4.81136665203793e-27	-5.9471	4.26246118247856e-25
11702000	11704000	AT4G22080	yes	Chr4	11700554	11702666	3.44144	3.9429	11690000	11692000	AT4G22070	Chr4	11691377	11694392	4.23164	4.71163	yes	5800	interaction296395	4-11702000	+	1720	4-11690000	+	1765	12043	58	0.069862	-182.378272	0	88	0.125256	4908.225392	-311.392607	3276	3048	-2.17577	891.774608	891.775	68	-5.80722	5.47366843625422e-28	-4.95157	8.85151269780998e-26
8606000	8608000	AT3G23830	NA	Chr3	8606476	8608083	0.772149	0.703757	8604000	8606000	AT3G23820	Chr3	8603443	8605462	0.558869	0.938768	NA	2000	interaction201335	3-8606000	+	322	3-8604000	+	724	2444	20	0.069862	-43.831582	0	14	0.069862	1400	-26.286665	483	1067	-2.17075	600	600	16	-1.39272	3.347225071211e-09	0.58401	3.96166893682969e-05
5270000	5272000	AT1G15310	NA	Chr1	5269018	5272058	0.782913	0.832717	5244000	5246000	AT1G15240	Chr1	5243449	5248604	0.769633	0.676203	NA	1000	interaction18382	1-5270000	+	1683	1-5244000	+	1763	26240	10	0.069862	-16.031583	0.000763	9	0.098522	638.193866	-13.7077	2799	2806	-2.16816	361.806134	361.806	6	-1.72742	7.97560343422516e-36	0.392317	0.0165111911145267
16288000	16290000	AT4G33985	NA	Chr4	16288111	16288913	0.753855	0.734271	16280000	16282000	AT4G33970	Chr4	16279794	16281894	0.482567	0.484764	NA	2000	interaction312833	4-16288000	+	352	4-16280000	+	995	7443	20	0.069862	-43.784185	0	14	0.069862	1400	-26.256867	589	1653	-2.16555	600	600	16	-1.29407	6.40103982802119e-08	-0.867294	0.0353675691443471
9506000	9508000	AT4G16892	NA	Chr4	9506321	9508337	0.577603	0.599978	9500000	9502000	AT4G16890	Chr4	9500505	9505455	0.596102	0.578236	NA	2800	interaction289096	4-9506000	+	1131	4-9500000	+	1195	6000	28	0.069862	-69.16818	0	21	0.069862	2100	-46.489123	1233	1288	-2.15842	700	700	24	2.88438	6.73194512868525e-12	2.55938	2.02741479868906e-44
10072000	10074000	AT1G28660	yes	Chr1	10071711	10073411	1.40387	1.78697	10054000	10056000	AT1G28610	Chr1	10053616	10055731	1.32595	1.71227	yes	2000	interaction35230	1-10072000	+	801	1-10054000	+	1612	17916	20	0.069862	-43.502916	0	14	0.069862	1400	-26.191465	1143	2324	-2.15425	600	600	16	2.2135	9.36934055770435e-07	4.4693	1.59930017521261e-30
24470000	24472000	AT1G65790	yes	Chr1	24468931	24472329	1.30193	1.54261	24444000	24446000	AT1G65730	Chr1	24442503	24446291	2.31589	2.71992	yes	2000	interaction82577	1-24470000	+	929	1-24444000	+	2652	25499	20	0.069862	-43.472925	0	14	0.069862	1400	-26.191405	1144	3870	-2.15424	600	600	16	4.74639	6.44078888187441e-14	-2.97413	9.28649100536923e-27
928000	930000	AT5G03640	NA	Chr5	927914	930781	0.670986	0.679267	920000	922000	AT5G03620	Chr5	918737	921874	0.648652	0.663564	NA	3800	interaction323092	5-928000	+	2027	5-920000	+	1326	8018	38	0.069862	-104.449919	0	42	0.095057	3086.796359	-119.093033	3164	2395	-2.15308	713.203641	713.204	38	-2.8078	3.6033631494142e-20	3.15474	5.63927144827522e-14
15538000	15540000	AT2G36990	yes	Chr2	15537257	15540139	0.781476	0.679909	15528000	15530000	AT2G36970	Chr2	15529005	15530749	1.4929	2.49351	yes	2000	interaction157122	2-15538000	+	1348	2-15528000	+	946	9758	20	0.069862	-43.469558	0	14	0.069862	1400	-26.181337	1875	1339	-2.15252	600	600	16	3.9445	2.56105947312085e-288	4.44111	2.11378405237162e-28
19258000	19260000	AT1G51860	yes	Chr1	19257633	19261479	1.06514	1.24629	19246000	19248000	AT1G51830	Chr1	19243024	19246010	2.23464	2.32675	yes	2000	interaction64752	1-19258000	+	1046	1-19246000	+	901	11339	20	0.069862	-43.478752	0	14	0.069862	1400	-26.180383	1628	1361	-2.15236	600	600	16	-3.94709	1.17390857614013e-46	-5.56695	4.51836677937221e-59
17616000	17618000	AT3G47760	yes	Chr3	17611786	17616639	1.84784	2.68206	17584000	17586000	AT3G47700	Chr3	17583600	17586624	0.713312	0.726384	NA	900	interaction234786	3-17616000	+	1802	3-17584000	+	1720	32119	9	0.069862	-13.714081	0.007132	8	0.099681	560.687113	-11.496435	3018	2633	-2.1461	339.312887	339.313	4	-5.23565	3.72936009656541e-08	-0.48506	0.000406349121079177
18766000	18768000	AT3G50570	yes	Chr3	18766748	18767529	3.00915	2.70651	18764000	18766000	AT3G50560	Chr3	18761087	18764016	1.26385	1.37482	yes	3900	interaction238861	3-18766000	+	810	3-18764000	+	502	2082	39	0.069862	-109.046979	0	31	0.069862	3100	-79.715241	1136	676	-2.13782	800	800	40	5.17816	2.34366150850149e-14	3.44423	1.08129524298478e-13
24748000	24750000	AT5G61550	NA	Chr5	24748101	24751871	0.575546	0.594316	24742000	24744000	AT5G61530	Chr5	24742047	24744784	0.795127	0.699654	NA	3900	interaction404041	5-24748000	+	1439	5-24742000	+	717	5849	39	0.069862	-108.606568	0	31	0.069862	3100	-79.408563	2364	1262	-2.11676	800	800	40	-5.00928	7.8203289183316e-51	-0.572342	1.23218756403829e-05
15384000	15386000	AT5G38430	NA	Chr5	15384116	15385247	0.585583	0.752107	15380000	15382000	AT5G38420	Chr5	15380944	15382035	1.63905	1.77737	yes	2100	interaction373327	5-15384000	+	451	5-15380000	+	865	4074	21	0.069862	-46.763174	0	15	0.069862	1500	-29.01586	511	878	-2.10822	600	600	16	7.74318	3.87646159150926e-219	7.95378	4.21861123925607e-170
12640000	12642000	AT4G24450	NA	Chr4	12635425	12642797	0.579102	0.622714	12618000	12620000	AT4G24400	Chr4	12617255	12620684	0.86653	0.788135	NA	1100	interaction299799	4-12640000	+	2276	4-12618000	+	860	22470	11	0.069862	-18.468965	7.4e-05	8	0.076592	729.707253	-11.501269	3696	1652	-2.10452	370.292747	370.293	6	2.42363	3.29259130209588e-26	-0.721998	7.26665445266791e-23
10768000	10770000	AT4G19820	yes	Chr4	10767435	10768614	2.51008	3.60657	10728000	10730000	AT4G19710	Chr4	10724854	10729768	0.905931	0.789882	yes	900	interaction293289	4-10768000	+	1650	4-10728000	+	1708	40183	9	0.069862	-13.714784	0.007132	7	0.086194	567.367214	-9.400463	2295	2994	-2.09584	332.632786	332.633	4	7.39876	1.76664378476993e-16	1.04694	6.06793012313739e-08
14618000	14620000	AT2G34680	NA	Chr2	14616621	14629129	0.693049	0.766946	14610000	14612000	AT2G34660	Chr2	14602469	14612565	0.706251	0.649278	NA	8100	interaction153985	2-14618000	+	1669	2-14610000	+	1969	7842	81	0.069862	-280.980918	0	112	0.110384	7088.484665	-423.159072	2564	3432	-2.09577	1011.515335	1011.52	104	-0.393594	0.000905626097604191	-0.762732	0.0297161577082012
16656000	16658000	AT2G39890	NA	Chr2	16655627	16658331	0.691927	0.69683	16648000	16650000	AT2G39880	Chr2	16647944	16649479	0.765234	0.839068	yes	2100	interaction160950	2-16656000	+	1272	2-16648000	+	535	8694	21	0.069862	-46.694777	0	15	0.069862	1500	-28.931383	2106	954	-2.09547	600	600	16	-0.611211	0.0285960398491108	1.19157	0.000128843435463368
7592000	7594000	AT5G22780	NA	Chr5	7589853	7598049	0.711456	0.626991	7586000	7588000	AT5G22770	Chr5	7579262	7588249	0.737824	0.625244	NA	1400	interaction346311	5-7592000	+	843	5-7586000	+	657	6293	14	0.069862	-26.242854	0	9	0.069862	900	-13.729742	1314	885	-2.09468	500	500	8	-0.220304	0.0392847883573017	-0.307172	0.000562850769522665
1224000	1226000	AT4G02760	NA	Chr4	1223958	1228941	0.614403	0.695046	1208000	1210000	AT4G02730	Chr4	1207724	1209287	0.844058	0.971679	NA	1400	interaction259263	4-1224000	+	534	4-1208000	+	2027	16190	14	0.069862	-26.270837	0	9	0.069862	900	-13.729098	903	3368	-2.0945	500	500	8	-1.75738	7.82577786287996e-53	-0.839179	0.000397277331710237
19272000	19274000	AT1G51880	yes	Chr1	19270192	19274068	2.15673	2.95586	19224000	19226000	AT1G51805	Chr1	19220976	19225690	1.62494	2.48797	yes	1400	interaction64862	1-19272000	+	2182	1-19224000	+	829	47748	14	0.069862	-26.217735	0	9	0.069862	900	-13.72682	3430	973	-2.09385	500	500	8	-5.75359	8.00641733934526e-38	7.1917	1.37600524771529e-223
16708000	16710000	AT4G35100	yes	Chr4	16708551	16710289	0.858984	1.12397	16702000	16704000	AT4G35090	Chr4	16700341	16703325	0.880299	0.740701	yes	1400	interaction314071	4-16708000	+	803	4-16702000	+	780	6611	14	0.069862	-26.223755	0	9	0.069862	900	-13.724486	1057	1343	-2.0932	500	500	8	0.824068	0.00164515868026727	1.26252	2.36053537547207e-09
21172000	21174000	AT1G56510	yes	Chr1	21167588	21173632	1.01342	1.77375	21158000	21160000	AT1G56500	Chr1	21159743	21167321	0.857098	0.765229	NA	1400	interaction71143	1-21172000	+	1254	1-21158000	+	1068	13367	14	0.069862	-26.196329	0	9	0.069862	900	-13.723126	1113	1555	-2.09281	500	500	8	7.00144	6.28193826751109e-75	4.0111	3.33265162847515e-131
14632000	14634000	AT2G34690	NA	Chr2	14630306	14632061	0.862976	0.845848	14618000	14620000	AT2G34680	Chr2	14616621	14629129	0.693049	0.766946	NA	1400	interaction154041	2-14632000	+	705	2-14618000	+	1669	14532	14	0.069862	-26.234602	0	9	0.069862	900	-13.722785	1128	2564	-2.09272	500	500	8	-0.930724	0.000104834901054455	-0.393594	0.000905626097604191
6244000	6246000	AT2G14620	yes	Chr2	6244780	6246233	1.73518	2.19636	6214000	6216000	AT2G14560	Chr2	6213971	6215901	2.09783	2.6531	yes	1400	interaction124458	2-6244000	+	1604	2-6214000	+	751	30558	14	0.069862	-26.22769	0	9	0.069862	900	-13.720877	2104	1220	-2.09218	500	500	8	-0.859178	0.00127405658508643	3.23034	0.000493283088819906
10644000	10646000	AT4G19520	yes	Chr4	10639268	10647079	1.45125	3.11146	10628000	10630000	AT4G19500	Chr4	10625658	10631570	0.814103	0.714032	NA	1400	interaction292834	4-10644000	+	1164	4-10628000	+	968	15628	14	0.069862	-26.203992	0	9	0.069862	900	-13.71815	1382	1381	-2.09141	500	500	8	3.09599	1.18530466429375e-17	1.48346	1.57893516643006e-31
20828000	20830000	AT5G51230	NA	Chr5	20823735	20829564	0.815109	0.753601	20812000	20814000	AT5G51200	Chr5	20804925	20819592	0.83847	0.781681	NA	1400	interaction391095	5-20828000	+	718	5-20812000	+	1068	16198	14	0.069862	-26.232558	0	9	0.069862	900	-13.717456	1429	1620	-2.09122	500	500	8	0.518097	0.000666291908315234	0.632463	0.0121483054205893
7080000	7082000	AT3G20300	yes	Chr3	7079616	7081921	0.798042	0.775245	7068000	7070000	AT3G20270	Chr3	7067056	7070946	0.728918	0.686188	NA	1400	interaction196198	3-7080000	+	1312	3-7068000	+	824	11998	14	0.069862	-26.218316	0	9	0.069862	900	-13.716992	1947	1463	-2.09109	500	500	8	2.5611	6.9368548099174e-35	1.94972	7.00265063176056e-30
24494000	24496000	AT1G65850	yes	Chr1	24494677	24498542	2.76792	3.11791	24444000	24446000	AT1G65730	Chr1	24442503	24446291	2.31589	2.71992	yes	1100	interaction82686	1-24494000	+	973	1-24444000	+	2652	50031	11	0.069862	-18.462778	7.4e-05	9	0.085975	731.330464	-13.713604	1771	3870	-2.09014	368.669536	368.67	6	-3.47514	2.95833870147107e-08	-2.97413	9.28649100536923e-27
17994000	17996000	AT3G48550	yes	Chr3	17993998	17994734	4.55507	5.06387	17960000	17962000	AT3G48490	Chr3	17961288	17961910	1.45461	1.78101	yes	1400	interaction236332	3-17994000	+	1326	3-17960000	+	1054	33474	14	0.069862	-26.197314	0	9	0.069862	900	-13.713009	2190	1839	-2.08997	500	500	8	1.42332	1.91288163212515e-10	0.617376	0.0109978804946902
960000	962000	AT4G02180	yes	Chr4	959963	963517	1.24086	1.8412	930000	932000	AT4G02100	Chr4	930064	932330	0.654829	0.873674	NA	1200	interaction258302	4-960000	+	1783	4-930000	+	1113	30135	12	0.069862	-20.957643	7e-06	9	0.077991	806.191517	-13.711288	3005	2069	-2.08949	393.808483	393.808	6	-3.82187	5.24549468853908e-40	-0.730566	3.2536847862339e-07
18450000	18452000	AT5G45520	NA	Chr5	18449508	18453012	0.488989	0.548379	18416000	18418000	AT5G45460	Chr5	18416613	18419481	0.608412	0.595869	NA	1000	interaction383218	5-18450000	+	1986	5-18416000	+	1514	33759	10	0.069862	-16.034008	0.000763	9	0.098151	640.605068	-13.709346	3248	2409	-2.08894	359.394932	359.395	6	4.72077	1.58830379545489e-26	0.386666	0.0282895825963084
25562000	25564000	AT1G68200	NA	Chr1	25562117	25563948	0.688762	0.809022	25556000	25558000	AT1G68185	Chr1	25556425	25558522	0.832082	0.714186	yes	3000	interaction86495	1-25562000	+	1523	1-25556000	+	760	5920	30	0.069862	-76.167833	0	23	0.069862	2300	-52.766366	2432	1153	-2.07851	700	700	28	-1.46495	0.00303999109648037	0.351411	0.00780035942105662
7980000	7982000	AT1G22590	yes	Chr1	7981739	7984334	1.09729	1.22013	7976000	7978000	AT1G22570	Chr1	7976619	7978573	1.94877	2.75902	yes	3000	interaction27920	1-7980000	+	697	1-7976000	+	1168	3641	30	0.069862	-76.217612	0	23	0.069862	2300	-52.757259	1207	1589	-2.07769	700	700	28	6.21873	9.36734637723064e-84	3.27631	1.7730425682099e-42
7014000	7016000	AT4G11610	yes	Chr4	7013728	7018049	1.29949	1.58962	7004000	7006000	AT4G11570	Chr4	7004332	7006081	0.889994	0.899395	NA	3700	interaction280718	4-7014000	+	2245	4-7004000	+	1073	9412	37	0.069862	-100.898687	0	39	0.090106	3023.793762	-107.954977	3535	2032	-2.07093	676.206238	676.206	36	-5.61028	1.96617018918136e-19	2.69174	1.20057807691762e-29
16034000	16036000	AT5G40060	NA	Chr5	16034575	16039096	0.801428	0.89064	16026000	16028000	AT5G40030	Chr5	16026226	16028283	0.699219	0.853543	yes	4900	interaction375386	5-16034000	+	1393	5-16026000	+	2013	7957	49	0.069862	-146.365616	0	44	0.074826	4108.10423	-126.784556	1860	3207	-2.05956	791.89577	791.896	54	2.2706	2.80021801743581e-41	-1.71475	2.54080510122274e-07
264000	266000	AT3G01720	NA	Chr3	262250	265905	0.646964	0.624689	248000	250000	AT3G01670	Chr3	247233	250470	0.621457	0.711616	NA	1882.884956	interaction171935	3-264000	+	1930	3-248000	+	2051	16005	22	0.081628	-49.536302	0	30	0.145178	1443.645869	-75.745826	3416	3388	-2.03027	439.239086	439.239	18	-2.14666	8.70039837653817e-43	0.592721	0.0082067946495729
2072000	2074000	AT3G06630	NA	Chr3	2070387	2073800	0.48862	0.603189	2066000	2068000	AT3G06620	Chr3	2062205	2067416	0.838036	0.677329	NA	5300	interaction178025	3-2072000	+	2426	3-2066000	+	1394	6452	53	0.069862	-162.276643	0	97	0.150381	4506.303401	-352.559917	4199	2855	-2.02912	793.696599	793.697	60	-2.36349	1.083283460225e-13	-0.383701	0.00341491988438439
6596000	6598000	AT1G19100	NA	Chr1	6594929	6601355	0.786544	0.671377	6586000	6588000	AT1G19080	Chr1	6584240	6586517	0.691242	0.557666	NA	900	interaction23148	1-6596000	+	887	1-6586000	+	278	9938	9	0.069862	-13.800929	0.006945	5	0.069862	500	-5.624747	1494	438	-2.02367	400	400	4	0.472877	0.00264739045539886	0.559541	0.0197578967730291
16292000	16294000	AT2G39010	yes	Chr2	16291476	16294034	1.45941	3.74481	16276000	16278000	AT2G38970	Chr2	16273900	16276872	0.686257	0.618438	yes	900	interaction159768	2-16292000	+	438	2-16276000	+	1539	16091	9	0.069862	-13.762861	0.007119	5	0.069862	500	-5.623158	492	2502	-2.02266	400	400	4	6.04218	7.2343054992986e-77	0.545547	8.14713739951192e-05
20944000	20946000	AT5G51560	NA	Chr5	20945684	20948854	0.712531	0.645944	20940000	20942000	AT5G51550	Chr5	20939493	20940895	0.618896	0.795925	NA	900	interaction391563	5-20944000	+	469	5-20940000	+	367	4731	9	0.069862	-13.775618	0.007076	5	0.069862	500	-5.621186	786	581	-2.02142	400	400	4	0.91932	3.76350456114989e-05	2.03684	3.05688167674194e-22
9794000	9796000	AT2G23000	yes	Chr2	9792211	9795863	1.13174	1.89497	9780000	9782000	AT2G22980	Chr2	9778876	9783251	1.58708	2.41884	yes	900	interaction137061	2-9794000	+	870	2-9780000	+	506	14105	9	0.069862	-13.754023	0.007131	5	0.069862	500	-5.620568	1262	616	-2.02103	400	400	4	3.85127	3.6437889814708e-25	3.78752	3.67984039566558e-16
12926000	12928000	AT1G35240	NA	Chr1	12927456	12930523	0.600429	0.545078	12912000	12914000	AT1G35220	Chr1	12908913	12914802	0.734574	0.647365	NA	900	interaction44760	1-12926000	+	475	1-12912000	+	1003	13868	9	0.069862	-13.757736	0.007129	5	0.069862	500	-5.620356	629	1342	-2.02089	400	400	4	-4.05416	5.77631887495532e-13	-0.805535	3.57625456271584e-11
10354000	10356000	AT1G29640	NA	Chr1	10355702	10356482	0.812333	0.977274	10344000	10346000	AT1G29600	Chr1	10344045	10346243	0.610225	0.635998	yes	900	interaction36192	1-10354000	+	357	1-10344000	+	1013	9824	9	0.069862	-13.777826	0.007066	5	0.069862	500	-5.620061	648	1622	-2.02071	400	400	4	-4.13282	6.50572107238844e-15	-1.53508	9.93220974302133e-09
7398000	7400000	AT1G21130	yes	Chr1	7399061	7400605	0.917371	1.21184	7384000	7386000	AT1G21090	Chr1	7384628	7386558	0.727229	0.768203	NA	900	interaction25909	1-7398000	+	364	1-7384000	+	474	14022	9	0.069862	-13.776267	0.007073	5	0.069862	500	-5.619769	668	956	-2.02053	400	400	4	2.36096	2.32607385644424e-07	-0.924189	1.2869918795406e-07
28124000	28126000	AT1G74860	NA	Chr1	28123318	28125882	0.743711	0.68038	28108000	28110000	AT1G74810	Chr1	28108473	28111534	0.648258	0.784776	yes	900	interaction94949	1-28124000	+	489	1-28108000	+	1705	15818	9	0.069862	-13.756	0.007131	5	0.069862	500	-5.619375	697	2830	-2.02028	400	400	4	0.584255	0.000176995215600604	3.63025	3.11236906844807e-05
3484000	3486000	AT3G11130	yes	Chr3	3482148	3491908	0.882846	0.845216	3478000	3480000	AT3G11110	Chr3	3479978	3480455	2.81225	5.20912	yes	900	interaction183273	3-3484000	+	906	3-3478000	+	446	6106	9	0.069862	-13.76168	0.007122	5	0.069862	500	-5.619085	1345	720	-2.02009	400	400	4	-0.614051	5.3780001684663e-12	7.31964	1.27597982392606e-33
7746000	7748000	AT2G17820	NA	Chr2	7742923	7748220	0.72184	0.637725	7730000	7732000	AT2G17787	Chr2	7731074	7733019	0.720413	0.784198	NA	900	interaction129943	2-7746000	+	1833	2-7730000	+	484	16318	9	0.069862	-13.756609	0.00713	5	0.069862	500	-5.618218	2572	799	-2.01955	400	400	4	-0.580343	0.00305343140010116	0.777503	2.15727929029203e-09
5514000	5516000	AT1G16080	NA	Chr1	5514316	5516027	0.650826	0.638095	5506000	5508000	AT1G16040	Chr1	5504734	5506611	0.841268	0.797376	NA	900	interaction19268	1-5514000	+	770	1-5506000	+	474	8377	9	0.069862	-13.757864	0.007129	5	0.069862	500	-5.618168	1309	804	-2.01952	400	400	4	2.8981	2.21162765146811e-49	-0.571868	2.05798176967725e-05
12684000	12686000	AT2G29670	NA	Chr2	12681957	12685087	0.818327	0.87505	12668000	12670000	AT2G29630	Chr2	12666934	12670311	0.7643	0.749649	NA	900	interaction146872	2-12684000	+	624	2-12668000	+	2256	15807	9	0.069862	-13.743284	0.007132	5	0.069862	500	-5.617886	834	3066	-2.01934	400	400	4	5.03881	9.41713087699423e-104	3.53512	3.93327578176328e-100
30042000	30044000	AT1G79860	yes	Chr1	30042091	30044175	2.67865	3.05128	30038000	30040000	AT1G79840	Chr1	30036955	30041440	2.38584	3.19419	yes	10900	interaction100940	1-30042000	+	1042	1-30038000	+	2291	3971	109	0.069862	-412.365646	0	143	0.101969	9797.329541	-575.7693	2184	3722	-2.0193	1102.670459	1102.67	154	-4.80709	6.19306061980694e-11	0.684838	0.0337105791967095
14584000	14586000	AT2G34640	yes	Chr2	14581885	14584699	0.700355	0.608909	14570000	14572000	AT2G34590	Chr2	14568810	14570969	0.821829	0.718119	NA	900	interaction153881	2-14584000	+	497	2-14570000	+	782	13706	9	0.069862	-13.755053	0.007131	5	0.069862	500	-5.617796	844	1417	-2.01928	400	400	4	2.77162	9.68297091642039e-52	0.703679	2.25881106381046e-05
10178000	10180000	AT2G23910	NA	Chr2	10177833	10180064	0.90928	1.01421	10154000	10156000	AT2G23840	Chr2	10153796	10155647	0.966752	2.35752	yes	900	interaction138182	2-10178000	+	490	2-10154000	+	1401	24234	9	0.069862	-13.75588	0.007131	5	0.069862	500	-5.61749	880	1854	-2.01909	400	400	4	-1.56538	1.52739388492964e-05	4.59354	2.81097616474796e-62
17896000	17898000	AT2G43040	NA	Chr2	17895882	17899374	0.642381	0.59641	17868000	17870000	AT2G42960	Chr2	17868596	17870630	0.633502	0.575837	NA	900	interaction165393	2-17896000	+	1724	2-17868000	+	639	28508	9	0.069862	-13.742204	0.007132	5	0.069862	500	-5.617458	2774	884	-2.01907	400	400	4	-2.12208	1.05406008816757e-39	0.611718	0.000703506801967399
6388000	6390000	AT2G14860	NA	Chr2	6387623	6389628	0.745521	0.785789	6370000	6372000	AT2G14835	Chr2	6366887	6371034	0.798626	0.724384	NA	900	interaction124882	2-6388000	+	605	2-6370000	+	488	17426	9	0.069862	-13.756121	0.00713	5	0.069862	500	-5.617284	975	906	-2.01896	400	400	4	0.741599	0.000868454708208177	-0.344556	8.19937668263784e-05
8218000	8220000	AT5G24210	yes	Chr5	8217334	8219619	2.3401	4.24263	8182000	8184000	AT5G24160	Chr5	8183074	8186640	2.37482	3.26137	yes	900	interaction348357	5-8218000	+	1486	5-8182000	+	603	35581	9	0.069862	-13.744886	0.007132	5	0.069862	500	-5.617083	2098	933	-2.01884	400	400	4	7.03964	1.30803500995815e-81	3.36316	1.02841768466305e-11
8334000	8336000	AT4G14500	NA	Chr4	8334175	8337273	0.809247	0.784666	8308000	8310000	AT4G14450	Chr4	8309473	8310058	3.56232	3.85542	yes	900	interaction284929	4-8334000	+	498	4-8308000	+	829	26335	9	0.069862	-13.754937	0.007131	5	0.069862	500	-5.616428	1033	1820	-2.01843	400	400	4	0.86978	2.92941803205681e-24	2.8059	1.40675701612119e-09
880000	882000	AT4G02010	NA	Chr4	881089	885399	0.705692	0.612677	854000	856000	AT4G01970	Chr4	853921	857008	0.627638	0.738742	yes	900	interaction258062	4-880000	+	669	4-854000	+	2073	26245	9	0.069862	-13.740191	0.007132	5	0.069862	500	-5.616416	1035	3234	-2.01842	400	400	4	-0.418542	0.000335802618548549	-2.9199	0.00069959473171885
16020000	16022000	AT4G33210	NA	Chr4	16015729	16020829	0.848701	0.751203	16000000	16002000	AT4G33180	Chr4	16000176	16002269	1.04068	1.26205	yes	900	interaction311707	4-16020000	+	634	4-16000000	+	756	20152	9	0.069862	-13.742558	0.007132	5	0.069862	500	-5.616082	1095	1330	-2.01821	400	400	4	0.317537	0.015812138104005	0.827371	7.93526840123096e-05
6698000	6700000	AT1G19380	NA	Chr1	6698057	6698824	0.686245	0.90759	6688000	6690000	AT1G19350	Chr1	6688521	6690414	0.655232	0.719776	NA	900	interaction23459	1-6698000	+	718	1-6688000	+	725	9720	9	0.069862	-13.737267	0.007132	5	0.069862	500	-5.616005	1181	1110	-2.01816	400	400	4	2.42321	8.62846497333002e-09	2.36749	3.36568889063581e-145
16874000	16876000	AT1G44608	yes	Chr1	16875118	16876258	1.28146	0.961236	16834000	16836000	AT1G44350	Chr1	16834209	16838286	2.19378	2.52269	yes	900	interaction56376	1-16874000	+	724	1-16834000	+	795	39930	9	0.069862	-13.736936	0.007132	5	0.069862	500	-5.615949	1121	1218	-2.01813	400	400	4	-4.37783	1.05980248698841e-12	1.98976	1.40391937245328e-13
688000	690000	AT4G01590	NA	Chr4	688812	690434	0.734507	0.843218	684000	686000	AT4G01580	Chr4	685745	686827	0.579831	0.747114	NA	1500	interaction257497	4-688000	+	405	4-684000	+	289	3281	15	0.069862	-29.15751	0	10	0.069862	1000	-16.096935	770	422	-2.01812	500	500	10	0.316939	0.0199094978608395	3.03448	3.22155058899385e-34
16612000	16614000	AT4G34860	NA	Chr4	16609745	16612907	0.611086	0.65046	16590000	16592000	AT4G34770	Chr4	16591228	16591892	2.41093	2.80906	yes	900	interaction313790	4-16612000	+	1133	4-16590000	+	723	21857	9	0.069862	-13.736991	0.007132	5	0.069862	500	-5.615904	2213	1130	-2.0181	400	400	4	-0.903666	1.2356801844011e-14	6.7173	3.86149300874787e-26
26330000	26332000	AT1G69910	NA	Chr1	26330113	26332266	0.59604	0.668763	26294000	26296000	AT1G69840	Chr1	26293600	26295849	0.73712	0.936325	yes	900	interaction88844	1-26330000	+	1331	1-26294000	+	777	35998	9	0.069862	-13.734237	0.007132	5	0.069862	500	-5.61585	2036	1141	-2.01806	400	400	4	1.63813	5.44841763535238e-39	1.62565	8.45908791780558e-12
14008000	14010000	AT5G35840	NA	Chr5	14007825	14011764	0.69032	0.618437	13958000	13960000	AT5G35790	Chr5	13956689	13959753	0.833586	0.760194	NA	900	interaction369461	5-14008000	+	1525	5-13958000	+	861	50220	9	0.069862	-13.730643	0.007132	5	0.069862	500	-5.615627	2304	1189	-2.01792	400	400	4	0.412566	0.000350414950304368	4.60347	2.00305455841723e-233
18366000	18368000	AT2G44490	NA	Chr2	18364755	18367725	0.838154	0.821756	18342000	18344000	AT2G44450	Chr2	18340920	18343849	0.906797	0.71697	yes	900	interaction166918	2-18366000	+	690	2-18342000	+	777	23896	9	0.069862	-13.738887	0.007132	5	0.069862	500	-5.615531	1211	1687	-2.01786	400	400	4	0.9889	7.0566891818856e-10	-2.51447	1.58371302627513e-50
26154000	26156000	AT5G65440	NA	Chr5	26151420	26157099	0.741028	0.687497	26136000	26138000	AT5G65410	Chr5	26136093	26137183	1.40302	6.54438	yes	900	interaction408362	5-26154000	+	1071	5-26136000	+	1038	17595	9	0.069862	-13.724981	0.007132	5	0.069862	500	-5.615531	1633	1211	-2.01786	400	400	4	0.632459	0.0175967104557511	6.93044	1.83509737079729e-102
13932000	13934000	AT2G32840	yes	Chr2	13932903	13934949	0.819048	0.76889	13910000	13912000	AT2G32795	Chr2	13909422	13910910	0.888385	1.43502	yes	900	interaction151274	2-13932000	+	933	2-13910000	+	799	22060	9	0.069862	-13.733223	0.007132	5	0.069862	500	-5.615442	1634	1232	-2.01781	400	400	4	0.487423	0.000183509902566257	2.7413	5.11876976599926e-18
24400000	24402000	AT1G65620	yes	Chr1	24398142	24400969	4.5951	5.51269	24332000	24334000	AT1G65480	Chr1	24331427	24333934	3.17636	3.54227	yes	900	interaction82278	1-24400000	+	772	1-24332000	+	1288	67891	9	0.069862	-13.734476	0.007132	5	0.069862	500	-5.615273	1274	1756	-2.0177	400	400	4	2.9509	3.05732143696332e-16	3.10776	1.0725854743716e-08
4296000	4298000	AT1G12620	yes	Chr1	4294593	4297084	0.707824	0.678788	4280000	4282000	AT1G12570	Chr1	4277992	4280862	3.02393	3.26619	yes	900	interaction15240	1-4296000	+	975	1-4280000	+	801	16154	9	0.069862	-13.733133	0.007132	5	0.069862	500	-5.615019	1548	1343	-2.01754	400	400	4	0.440002	0.00245127255591869	4.33362	3.36978202202541e-18
6388000	6390000	AT5G19090	NA	Chr5	6387488	6390024	0.562241	0.563111	6370000	6372000	AT5G19050	Chr5	6369266	6371904	0.820379	0.765254	yes	900	interaction342103	5-6388000	+	909	5-6370000	+	1146	17969	9	0.069862	-13.728889	0.007132	5	0.069862	500	-5.615016	1344	1861	-2.01754	400	400	4	0.84517	3.2232227181392e-12	-0.858445	1.48684963229048e-05
12930000	12932000	AT2G30340	yes	Chr2	12931218	12932582	2.67545	3.27105	12910000	12912000	AT2G30280	Chr2	12909592	12912340	0.829635	0.757606	NA	900	interaction147849	2-12930000	+	752	2-12910000	+	896	20492	9	0.069862	-13.735463	0.007132	5	0.069862	500	-5.614917	1482	1373	-2.01748	400	400	4	-5.10924	8.50865581261768e-23	0.432897	0.00210358611492398
10044000	10046000	AT5G28050	NA	Chr5	10043913	10045975	0.809602	0.810344	10024000	10026000	AT5G28010	Chr5	10024812	10025382	1.42737	1.60075	yes	900	interaction354752	5-10044000	+	717	5-10024000	+	865	20017	9	0.069862	-13.737322	0.007132	5	0.069862	500	-5.61488	1384	1555	-2.01746	400	400	4	-0.439426	0.016165413940992	2.02833	1.32398832425447e-08
23646000	23648000	AT1G63740	NA	Chr1	23645428	23648973	0.705754	0.666251	23620000	23622000	AT1G63690	Chr1	23618377	23622396	0.79955	0.777172	NA	900	interaction79412	1-23646000	+	1274	1-23620000	+	890	25929	9	0.069862	-13.729561	0.007132	5	0.069862	500	-5.614831	1976	1399	-2.01742	400	400	4	-0.361071	0.0109972440689442	0.474601	1.51161850848892e-06
7430000	7432000	AT2G17070	yes	Chr2	7430862	7431654	1.69628	2.27182	7404000	7406000	AT2G17036	Chr2	7403855	7405219	0.763265	0.640614	NA	900	interaction128843	2-7430000	+	2302	2-7404000	+	905	27027	9	0.069862	-13.729028	0.007132	5	0.069862	500	-5.614809	3441	1406	-2.01741	400	400	4	-4.88323	1.07405052041308e-12	1.27253	4.81111749081277e-06
9452000	9454000	AT2G22240	NA	Chr2	9451604	9454094	0.657657	0.635212	9416000	9418000	AT2G22140	Chr2	9414838	9418668	0.767092	0.84975	yes	900	interaction136131	2-9452000	+	1926	2-9416000	+	929	35808	9	0.069862	-13.728212	0.007132	5	0.069862	500	-5.614793	2609	1411	-2.0174	400	400	4	1.25192	6.46531664545871e-05	0.965054	0.00563591921930411
2618000	2620000	AT3G08620	NA	Chr3	2617767	2620573	0.755362	0.70099	2606000	2608000	AT3G08580	Chr3	2605441	2607787	0.803164	0.74585	NA	900	interaction179929	3-2618000	+	1169	3-2606000	+	948	11818	9	0.069862	-13.727595	0.007132	5	0.069862	500	-5.614655	2013	1456	-2.01731	400	400	4	0.320468	0.0291067496429016	-0.832284	6.69372984396194e-28
458000	460000	AT5G02250	NA	Chr5	454782	459527	0.791385	0.707558	428000	430000	AT5G02170	Chr5	427832	430695	0.724805	0.786864	NA	900	interaction321444	5-458000	+	1562	5-428000	+	983	29500	9	0.069862	-13.726521	0.007132	5	0.069862	500	-5.614637	2488	1462	-2.0173	400	400	4	1.65912	1.0491654758894e-60	-1.36912	0.0403793107169038
9062000	9064000	AT1G26200	yes	Chr1	9063470	9064914	1.60596	1.32922	9034000	9036000	AT1G26130	Chr1	9033217	9038577	0.575743	0.598598	NA	900	interaction31664	1-9062000	+	952	1-9034000	+	1794	28633	9	0.069862	-13.727468	0.007132	5	0.069862	500	-5.614387	1552	2723	-2.01715	400	400	4	-1.71172	0.000532292389148162	0.995857	4.4803057925114e-09
17632000	17634000	AT3G47790	NA	Chr3	17629529	17633911	0.576893	0.620423	17602000	17604000	AT3G47740	Chr3	17600650	17604965	1.50279	2.07066	yes	900	interaction234886	3-17632000	+	1222	3-17602000	+	1059	30706	9	0.069862	-13.724435	0.007132	5	0.069862	500	-5.614276	1925	1596	-2.01708	400	400	4	-5.48692	5.99024878662541e-40	-5.63629	6.10719748128447e-13
8268000	8270000	AT1G23310	NA	Chr1	8268403	8271933	0.794535	0.727797	8240000	8242000	AT1G23210	Chr1	8240173	8242129	1.15506	1.31101	yes	900	interaction28928	1-8268000	+	1609	1-8240000	+	921	27495	9	0.069862	-13.728479	0.007132	5	0.069862	500	-5.614229	2510	1615	-2.01705	400	400	4	4.89841	1.19562016154265e-172	-4.2004	4.50682096753618e-15
7478000	7480000	AT3G21280	NA	Chr3	7477986	7482070	0.754257	0.678285	7450000	7452000	AT3G21230	Chr3	7448039	7452000	1.07866	0.87314	yes	900	interaction197690	3-7478000	+	1071	3-7450000	+	1169	27863	9	0.069862	-13.724133	0.007132	5	0.069862	500	-5.613995	1718	2263	-2.0169	400	400	4	0.565193	5.89397766754738e-09	-1.88253	3.76207980676136e-21
20834000	20836000	AT5G51270	NA	Chr5	20835136	20838262	0.535279	0.610547	20798000	20800000	AT5G51180	Chr5	20797016	20800214	0.896837	0.772904	NA	900	interaction391132	5-20834000	+	1103	5-20798000	+	1073	35981	9	0.069862	-13.724083	0.007132	5	0.069862	500	-5.613964	1865	1733	-2.01688	400	400	4	-3.9176	1.16742306691665e-15	0.64846	6.14257117091158e-07
10052000	10054000	AT2G23630	yes	Chr2	10052565	10055317	1.80232	1.93842	10016000	10018000	AT2G23520	Chr2	10013990	10016943	0.877508	0.762567	NA	900	interaction137822	2-10052000	+	1418	2-10016000	+	1023	37023	9	0.069862	-13.725384	0.007132	5	0.069862	500	-5.613928	2083	1750	-2.01686	400	400	4	-5.60009	1.10651418436313e-14	0.222139	0.030530085553899
22538000	22540000	AT1G61140	NA	Chr1	22534716	22540850	0.844031	0.820622	22508000	22510000	AT1G61100	Chr1	22508537	22512333	0.860554	0.913923	NA	900	interaction75677	1-22538000	+	1198	1-22508000	+	1182	29563	9	0.069862	-13.721629	0.007132	5	0.069862	500	-5.613918	2037	1755	-2.01685	400	400	4	-0.696563	1.64313013354489e-05	0.77138	0.00786332354119652
5506000	5508000	AT5G16750	NA	Chr5	5504345	5509343	0.762802	0.718314	5470000	5472000	AT5G16680	Chr5	5467372	5473506	0.707306	0.710524	NA	900	interaction338906	5-5506000	+	1710	5-5470000	+	1215	36492	9	0.069862	-13.720973	0.007132	5	0.069862	500	-5.61386	2814	1784	-2.01682	400	400	4	-0.566043	0.0203142938751649	-0.351551	0.000234395620125717
10962000	10964000	AT2G25730	NA	Chr2	10956300	10972927	0.811425	0.720457	10922000	10924000	AT2G25660	Chr2	10916202	10927390	0.729669	0.637246	NA	900	interaction140928	2-10962000	+	1538	2-10922000	+	1100	40126	9	0.069862	-13.72343	0.007132	5	0.069862	500	-5.613717	2429	1859	-2.01673	400	400	4	-0.499285	3.9767340778697e-05	0.951462	2.51238288625386e-11
2094000	2096000	AT5G06780	NA	Chr5	2093882	2097129	0.857751	0.763421	2056000	2058000	AT5G06680	Chr5	2056586	2059787	0.708153	0.67327	NA	900	interaction327160	5-2094000	+	1390	5-2056000	+	1191	38051	9	0.069862	-13.721446	0.007132	5	0.069862	500	-5.613672	2299	1884	-2.0167	400	400	4	0.325538	0.00155781019935171	-0.307161	0.00289568135139723
20446000	20448000	AT3G55160	NA	Chr3	20445411	20452400	0.659661	0.607055	20426000	20428000	AT3G55110	Chr3	20424549	20427377	3.18409	4.27327	yes	900	interaction244651	3-20446000	+	1663	3-20426000	+	1251	20597	9	0.069862	-13.720297	0.007132	5	0.069862	500	-5.613574	2531	1941	-2.01664	400	400	4	-0.555484	0.0488099497378342	5.61368	5.11312067636934e-37
18678000	18680000	AT1G50420	NA	Chr1	18677925	18680117	0.68188	0.679857	18650000	18652000	AT1G50360	Chr1	18649746	18657376	0.620139	0.651378	NA	900	interaction62748	1-18678000	+	1644	1-18650000	+	1165	27911	9	0.069862	-13.721981	0.007132	5	0.069862	500	-5.613461	2680	2011	-2.01657	400	400	4	-1.13128	9.88396023194296e-17	-0.612003	8.36906877577787e-08
15654000	15656000	AT2G37280	NA	Chr2	15650399	15656417	0.510865	0.6071	15642000	15644000	AT2G37250	Chr2	15641905	15643786	0.852539	0.892766	NA	2200	interaction157496	2-15654000	+	2188	2-15642000	+	1359	11902	22	0.069862	-49.582572	0	24	0.099112	1691.710807	-55.865274	3766	2098	-2.01425	508.289193	508.289	18	-2.74377	5.57433906386387e-20	-1.03929	4.73084919056197e-24
9512000	9514000	AT4G16900	NA	Chr4	9511858	9516541	0.627999	0.562104	9496000	9498000	AT4G16880	Chr4	9496184	9497313	0.636018	0.918189	NA	1500	interaction289136	4-9512000	+	2110	4-9496000	+	580	15626	15	0.069862	-28.994136	0	10	0.069862	1000	-16.069748	2584	612	-2.01193	500	500	10	1.16585	7.73801154939317e-22	7.48101	6.81002425650426e-49
17720000	17722000	AT5G44040	NA	Chr5	17719658	17721580	0.711099	0.649574	17712000	17714000	AT5G44020	Chr5	17712408	17714336	2.47468	2.01185	yes	1500	interaction380827	5-17720000	+	367	5-17712000	+	749	7808	15	0.069862	-29.087912	0	10	0.069862	1000	-16.067295	638	1184	-2.01138	500	500	10	0.958257	1.28677777840816e-20	1.36463	0.000377968761221796
7940000	7942000	AT1G22490	yes	Chr1	7938250	7940592	2.01772	2.42601	7932000	7934000	AT1G22470	Chr1	7932853	7933390	2.16616	1.15536	yes	1500	interaction27781	1-7940000	+	988	1-7932000	+	533	7549	15	0.069862	-29.008316	0	10	0.069862	1000	-16.066935	1547	642	-2.01129	500	500	10	2.69982	7.61123839546691e-16	-2.35379	8.52015135068848e-09
9548000	9550000	AT4G16960	NA	Chr4	9546342	9551007	0.400495	0.414563	9542000	9544000	AT4G16950	Chr4	9538797	9544467	0.398034	0.329196	NA	1500	interaction289320	4-9548000	+	526	4-9542000	+	797	5755	15	0.069862	-29.010647	0	10	0.069862	1000	-16.056917	778	887	-2.00903	500	500	10	-1.53638	0.000183322470094043	2.61975	7.22284784353196e-50
25816000	25818000	AT1G68740	yes	Chr1	25812448	25816657	0.66188	0.752762	25806000	25808000	AT1G68720	Chr1	25804417	25808982	0.675889	0.679921	NA	1500	interaction87261	1-25816000	+	505	1-25806000	+	1077	10208	15	0.069862	-29.018032	0	10	0.069862	1000	-16.054227	825	1772	-2.00842	500	500	10	1.84459	1.09825278460661e-12	0.457069	0.00931986141227023
19900000	19902000	AT1G53340	yes	Chr1	19898927	19900931	2.22184	1.77044	19888000	19890000	AT1G53310	Chr1	19884026	19888369	0.718735	0.665584	NA	1500	interaction66807	1-19900000	+	850	1-19888000	+	610	11835	15	0.069862	-28.986238	0	10	0.069862	1000	-16.047229	1512	979	-2.00685	500	500	10	-2.84944	1.1317532515003e-13	-1.34852	3.32241668751293e-40
17420000	17422000	AT3G47290	yes	Chr3	17420509	17423588	0.704545	1.56473	17400000	17402000	AT3G47250	Chr3	17399876	17401731	0.874165	1.5588	yes	1500	interaction234184	3-17420000	+	727	3-17400000	+	1045	20285	15	0.069862	-28.961711	0	10	0.069862	1000	-16.046187	1007	1288	-2.00662	500	500	10	6.01018	5.45886230690412e-193	5.84948	5.80859690495683e-39
17460000	17462000	AT3G47390	yes	Chr3	17459338	17464716	0.855977	0.765785	17450000	17452000	AT3G47360	Chr3	17451111	17452843	0.833662	0.735235	NA	1500	interaction234281	3-17460000	+	716	3-17450000	+	1213	9757	15	0.069862	-28.963673	0	10	0.069862	1000	-16.043109	1100	1851	-2.00593	500	500	10	0.635396	6.46773803415793e-05	-1.069	7.57487777227808e-07
12182000	12184000	AT1G33600	yes	Chr1	12180775	12182363	1.0279	2.02778	12168000	12170000	AT1G33560	Chr1	12168767	12172005	1.02221	0.856991	yes	1500	interaction42336	1-12182000	+	703	1-12168000	+	1044	13607	15	0.069862	-28.966071	0	10	0.069862	1000	-16.04275	1112	1875	-2.00584	500	500	10	4.97643	5.66838617292915e-141	-0.96305	8.42610349465416e-05
12986000	12988000	AT4G25410	yes	Chr4	12985754	12987217	4.53417	4.11508	12978000	12980000	AT4G25390	Chr4	12977340	12979568	0.698815	0.762454	NA	1500	interaction301116	4-12986000	+	687	4-12978000	+	659	8069	15	0.069862	-28.974897	0	10	0.069862	1000	-16.039687	1936	1226	-2.00516	500	500	10	-2.6638	5.58492089495126e-10	-1.31596	3.20171642581226e-07
11552000	11554000	AT1G32120	NA	Chr1	11552925	11558777	0.659543	0.711244	11532000	11534000	AT1G32060	Chr1	11532532	11534639	0.825112	0.550896	NA	1500	interaction40378	1-11552000	+	752	1-11532000	+	1216	19978	15	0.069862	-28.957467	0	10	0.069862	1000	-16.03895	1257	1722	-2.00499	500	500	10	3.63966	3.46473626897491e-62	7.50235	2.25705537972321e-199
9266000	9268000	AT5G26570	NA	Chr5	9261579	9267729	0.79225	0.60661	9244000	9246000	AT5G26340	Chr5	9243510	9247066	1.7315	1.29396	yes	1500	interaction351949	5-9266000	+	1392	5-9244000	+	1022	22547	15	0.069862	-28.924935	0	10	0.069862	1000	-16.032897	1938	1587	-2.00364	500	500	10	1.72342	3.30117806669103e-59	1.42354	1.36975615035852e-08
5740000	5742000	AT1G16780	NA	Chr1	5739298	5744214	0.609364	0.598183	5724000	5726000	AT1G16720	Chr1	5723087	5726478	0.707102	0.560408	NA	1500	interaction20165	1-5740000	+	1443	1-5724000	+	1212	15660	15	0.069862	-28.910771	0	10	0.069862	1000	-16.028764	2290	1934	-2.00271	500	500	10	2.35469	3.89468240836797e-69	3.92088	2.78018664431929e-103
2112000	2114000	AT1G06890	NA	Chr1	2111362	2114601	0.800572	0.783658	2098000	2100000	AT1G06840	Chr1	2097746	2103479	0.685927	0.690331	NA	1500	interaction7410	1-2112000	+	1250	1-2098000	+	1508	14566	15	0.069862	-28.908457	0	10	0.069862	1000	-16.027059	2126	2373	-2.00233	500	500	10	-0.673313	2.21345502032887e-07	-1.23833	1.37824102928753e-10
9786000	9788000	AT5G27650	NA	Chr5	9785406	9789232	0.705057	0.686441	9778000	9780000	AT5G27630	Chr5	9776022	9781002	0.61929	0.632448	yes	3200	interaction353699	5-9786000	+	1333	5-9778000	+	1168	8159	32	0.069862	-82.929592	0	25	0.069862	2500	-59.125723	2041	1723	-2.00225	700	700	30	0.31026	0.00105547935869092	1.69586	8.05847939308634e-10
6412000	6414000	AT1G18620	NA	Chr1	6409977	6414451	0.72916	0.563923	6406000	6408000	AT1G18610	Chr1	6405644	6409297	0.694812	0.687746	NA	5700	interaction22543	1-6412000	+	1714	1-6406000	+	870	5697	57	0.069862	-179.190148	0	48	0.069862	4800	-142.541659	2488	1234	-1.99816	900	900	66	3.08494	2.08421005418589e-40	0.744233	5.68135848973648e-08
264000	266000	AT3G01720	NA	Chr3	262250	265905	0.646964	0.624689	252000	254000	AT3G01680	Chr3	251980	255513	0.96426	1.12837	yes	2050.161357	interaction171937	3-264000	+	1930	3-252000	+	2483	12173	29	0.098821	-72.420311	0	43	0.18323	1639.508145	-122.763394	3416	4276	-1.99666	410.653212	410.653	26	-2.14666	8.70039837653817e-43	0.752765	1.65917030050376e-06
5536000	5538000	AT1G16160	NA	Chr1	5535972	5538269	0.560101	0.628723	5520000	5522000	AT1G16110	Chr1	5518372	5520891	0.694111	0.549606	NA	1900	interaction19373	1-5536000	+	2122	1-5520000	+	1483	16646	19	0.069862	-40.392669	0	23	0.11161	1439.680054	-52.660718	3698	2406	-1.96215	460.319946	460.32	14	-4.77542	4.36839964047331e-18	1.07539	0.000129305011370724
5742000	5744000	AT1G16780	NA	Chr1	5739298	5744214	0.609364	0.598183	5730000	5732000	AT1G16750	Chr1	5729096	5731870	0.668285	0.541607	NA	3200	interaction20181	1-5742000	+	1667	1-5730000	+	1723	11954	32	0.069862	-82.808328	0	33	0.088621	2601.479483	-86.213377	2642	2674	-1.96193	598.520517	598.521	30	2.35469	3.89468240836797e-69	4.39199	2.35278432357853e-124
6262000	6264000	AT5G18770	NA	Chr5	6261351	6263436	0.679125	0.622023	6238000	6240000	AT5G18700	Chr5	6235095	6240733	0.574996	0.544963	NA	1100	interaction341660	5-6262000	+	1096	5-6238000	+	2503	23684	11	0.069862	-18.457499	7.4e-05	11	0.102148	752.322086	-18.438941	1976	4121	-1.95942	347.677914	347.678	6	0.517433	0.000788489880900868	0.988833	0.000141041846594824
20698000	20700000	AT1G55430	yes	Chr1	20697648	20699622	2.70121	3.5927	20690000	20692000	AT1G55420	Chr1	20691774	20693952	2.79663	2.90294	yes	5400	interaction69475	1-20698000	+	2259	1-20690000	+	1349	7923	54	0.069862	-166.337917	0	102	0.153909	4629.96459	-375.820187	4439	2764	-1.95397	770.03541	770.035	62	-5.05875	1.87420674631167e-35	-4.58703	4.29335823796162e-41
3902000	3904000	AT1G11600	yes	Chr1	3902011	3903782	3.22801	3.51771	3868000	3870000	AT1G11490	Chr1	3868883	3870065	0.763768	0.790354	NA	1300	interaction13943	1-3902000	+	1569	1-3868000	+	2093	33833	13	0.069862	-23.520905	1e-06	18	0.136371	922.12668	-37.383937	3224	3372	-1.95288	377.87332	377.873	8	3.72042	2.28176754669768e-55	-2.32697	3.07386729699305e-05
27440000	27442000	AT1G72930	NA	Chr1	27439451	27440464	0.786559	1.06855	27434000	27436000	AT1G72910	Chr1	27435613	27437144	0.645313	0.712045	NA	1600	interaction92403	1-27440000	+	402	1-27434000	+	630	6425	16	0.069862	-31.877592	0	11	0.069862	1100	-18.509174	491	922	-1.94159	500	500	10	4.82094	6.96535465984702e-58	6.47131	3.84616007531924e-64
15384000	15386000	AT5G38430	NA	Chr5	15384116	15385247	0.585583	0.752107	15378000	15380000	AT5G38410	Chr5	15377172	15378416	0.61952	1.48226	yes	1600	interaction373326	5-15384000	+	451	5-15378000	+	1027	5656	16	0.069862	-31.848295	0	11	0.069862	1100	-18.505494	511	1022	-1.9409	500	500	10	7.74318	3.87646159150926e-219	7.83776	1.68463897626054e-161
24912000	24914000	AT5G62000	NA	Chr5	24910357	24915210	0.779303	0.763252	24896000	24898000	AT5G61980	Chr5	24894471	24899973	0.557515	0.594065	NA	2400	interaction404686	5-24912000	+	1008	5-24896000	+	1725	16213	24	0.069862	-55.997561	0	18	0.069862	1800	-37.431088	1530	2683	-1.94084	600	600	20	0.706843	1.44996545250223e-12	-1.47523	1.14136370702174e-19
3356000	3358000	AT3G10720	yes	Chr3	3354446	3357614	0.910421	1.38024	3342000	3344000	AT3G10690	Chr3	3339391	3346340	0.645168	0.633112	NA	2400	interaction182832	3-3356000	+	1304	3-3342000	+	1498	13201	24	0.069862	-55.939619	0	18	0.069862	1800	-37.42662	1610	2332	-1.94037	600	600	20	2.31323	8.01131750505621e-14	1.02191	0.000340394960032226
20260000	20262000	AT5G49850	yes	Chr5	20259907	20262585	1.34736	1.58012	20248000	20250000	AT5G49820	Chr5	20246499	20249545	0.831925	0.745361	NA	2400	interaction389392	5-20260000	+	1064	5-20248000	+	1401	12093	24	0.069862	-55.984106	0	18	0.069862	1800	-37.414591	1874	2341	-1.93913	600	600	20	-2.38799	3.23269488306557e-07	1.31276	1.6560569218538e-52
6272000	6274000	AT3G18290	NA	Chr3	6273994	6280510	0.799708	0.711693	6266000	6268000	AT3G18280	Chr3	6267048	6267643	3.68418	2.69384	yes	1600	interaction193031	3-6272000	+	414	3-6266000	+	746	5165	16	0.069862	-31.869767	0	11	0.069862	1100	-18.494352	583	1488	-1.93883	500	500	10	1.95919	5.02070718758744e-101	-2.06153	1.9826640067401e-44
18408000	18410000	AT1G49740	NA	Chr1	18407517	18410022	0.763211	0.636916	18404000	18406000	AT1G49730	Chr1	18402505	18405681	0.746982	0.607626	NA	1600	interaction61706	1-18408000	+	475	1-18404000	+	825	3152	16	0.069862	-31.836178	0	11	0.069862	1100	-18.474511	779	1078	-1.93516	500	500	10	0.404323	0.02006760076966	3.06561	1.21407088421478e-207
10582000	10584000	AT4G19410	NA	Chr4	10580892	10585861	0.809462	0.779006	10576000	10578000	AT4G19390	Chr4	10574767	10576428	0.844492	1.00751	yes	1600	interaction292644	4-10582000	+	851	4-10576000	+	552	6260	16	0.069862	-31.804494	0	11	0.069862	1100	-18.473109	1311	798	-1.9349	500	500	10	0.470756	2.83772585178351e-05	1.43769	5.67149825443992e-05
2132000	2134000	AT3G06760	NA	Chr3	2132757	2134556	0.685902	0.702738	2130000	2132000	AT3G06750	Chr3	2129622	2130315	0.58916	0.69966	NA	4700	interaction178270	3-2132000	+	815	3-2130000	+	679	1872	47	0.069862	-139.344275	0	39	0.069862	3900	-108.345847	1080	965	-1.93471	800	800	52	0.869192	3.39603870624934e-08	2.39604	2.45514712667275e-103
5760000	5762000	AT4G08980	NA	Chr4	5758104	5760558	0.776319	0.802914	5746000	5748000	AT4G08960	Chr4	5746288	5748285	0.775746	0.783521	NA	1600	interaction276694	4-5760000	+	756	4-5746000	+	922	13984	16	0.069862	-31.751996	0	11	0.069862	1100	-18.461507	1000	1526	-1.93277	500	500	10	0.226415	0.0349068898670498	-0.357057	0.042405204635784
13660000	13662000	AT5G35430	NA	Chr5	13661922	13666015	0.81286	0.782745	13638000	13640000	AT5G35410	Chr5	13634453	13638297	0.749872	0.698013	yes	1600	interaction368236	5-13660000	+	679	5-13638000	+	1249	21510	16	0.069862	-31.768073	0	11	0.069862	1100	-18.457347	1100	1770	-1.932	500	500	10	-0.358746	0.000474964484701441	-0.398129	0.00486759550554237
6514000	6516000	AT5G19340	yes	Chr5	6515091	6516205	0.737968	1.09266	6502000	6504000	AT5G19310	Chr5	6498778	6503432	0.667364	0.600005	NA	1600	interaction342489	5-6514000	+	1578	5-6502000	+	757	12561	16	0.069862	-31.751809	0	11	0.069862	1100	-18.45401	2565	1196	-1.93139	500	500	10	-0.717723	0.00655900134947074	0.857012	0.00353401242090045
11408000	11410000	AT4G21430	NA	Chr4	11407803	11412159	0.789388	0.722282	11398000	11400000	AT4G21400	Chr4	11399130	11401709	0.630141	0.618432	NA	1600	interaction295411	4-11408000	+	1570	4-11398000	+	725	9980	16	0.069862	-31.758055	0	11	0.069862	1100	-18.452654	2298	1240	-1.93114	500	500	10	0.83206	0.000192304268750874	-0.667434	0.00545484596958505
21556000	21558000	AT5G53150	NA	Chr5	21554790	21557491	0.714165	0.594957	21538000	21540000	AT5G53130	Chr5	21537720	21541029	0.780538	0.722383	NA	1600	interaction393652	5-21556000	+	1309	5-21538000	+	798	18379	16	0.069862	-31.744545	0	11	0.069862	1100	-18.452417	2101	1248	-1.9311	500	500	10	0.492376	9.27599689683393e-05	1.03822	1.3178191191047e-13
17024000	17026000	AT4G35950	NA	Chr4	17023836	17025863	0.743037	0.546958	17012000	17014000	AT4G35920	Chr4	17011787	17015256	0.747961	0.73534	NA	1600	interaction315200	4-17024000	+	1191	4-17012000	+	1380	11747	16	0.069862	-31.70041	0	11	0.069862	1100	-18.443236	1666	2472	-1.92942	500	500	10	1.03098	3.0063331095046e-12	0.438461	0.000519143655279786
20448000	20450000	AT3G55160	NA	Chr3	20445411	20452400	0.659661	0.607055	20424000	20426000	AT3G55110	Chr3	20424549	20427377	3.18409	4.27327	yes	867.532712	interaction244661	3-20448000	+	1637	3-20424000	+	2147	23484	9	0.072477	-13.714921	0.007132	9	0.110429	569.377826	-13.708287	2646	3327	-1.92813	298.154885	298.155	4	-0.555484	0.0488099497378342	5.61368	5.11312067636934e-37
18284000	18286000	AT5G45200	yes	Chr5	18283966	18290332	2.56766	2.75378	18262000	18264000	AT5G45150	Chr5	18260440	18264346	0.536643	0.606073	NA	1381.503192	interaction382637	5-18284000	+	2337	5-18262000	+	1574	21540	15	0.075854	-28.893281	0	14	0.096635	1012.127878	-26.160394	3709	2077	-1.92486	369.375313	369.375	10	-5.13828	2.58913987951404e-15	0.959186	0.00604857026063387
5258000	5260000	AT1G15290	NA	Chr1	5257045	5264942	0.790361	0.644168	5232000	5234000	AT1G15210	Chr1	5231347	5236573	0.556706	0.719967	yes	900	interaction18322	1-5258000	+	1972	1-5232000	+	1494	26291	9	0.069862	-13.716588	0.007132	9	0.106291	591.5457	-13.70739	2887	2935	-1.9231	308.4543	308.454	4	3.524	1.28436183775593e-38	-5.23768	7.77927335712567e-76
18062000	18064000	AT2G43500	NA	Chr2	18061924	18066639	0.762655	0.756783	18056000	18058000	AT2G43490	Chr2	18054391	18058836	0.735686	0.714898	yes	3500	interaction165873	2-18062000	+	834	2-18056000	+	1559	5899	35	0.069862	-93.791275	0	28	0.069862	2800	-69.096224	1465	2755	-1.91519	700	700	34	1.15731	0.000711334696062141	-0.716703	0.00140610453235605
26848000	26850000	AT5G67290	NA	Chr5	26848147	26849846	0.631069	0.674154	26844000	26846000	AT5G67280	Chr5	26842269	26845190	0.640769	0.893244	yes	7900	interaction410453	5-26848000	+	1198	5-26844000	+	1167	3924	79	0.069862	-272.913447	0	69	0.069862	6900	-228.420308	1887	1855	-1.90552	1000	1000	102	0.966758	4.52016736473634e-10	1.93181	1.90909606378447e-27
2858000	2860000	AT3G09300	NA	Chr3	2857846	2860668	0.764583	0.751524	2836000	2838000	AT3G09240	Chr3	2835667	2837956	0.528513	0.639672	NA	1600	interaction180875	3-2858000	+	1249	3-2836000	+	1760	22011	16	0.069862	-31.69626	0	17	0.099766	1190.435126	-34.50648	2069	3844	-1.90407	409.564874	409.565	10	-0.548387	4.03378208287599e-07	-4.39272	5.87859471068773e-27
21748000	21750000	AT1G58602	NA	Chr1	21746353	21765705	0.793677	0.883	21736000	21738000	AT1G58520	Chr1	21729912	21738652	0.726449	0.651718	NA	2500	interaction73070	1-21748000	+	1906	1-21736000	+	900	11706	25	0.069862	-59.274672	0	19	0.069862	1900	-40.419183	2201	1183	-1.90267	600	600	22	6.48534	3.72491263006463e-200	0.9433	0.00984720967903111
850000	852000	AT5G03430	NA	Chr5	848863	853142	0.835174	0.737462	840000	842000	AT5G03406	Chr5	839884	841875	0.684653	0.706232	NA	2500	interaction322822	5-850000	+	1119	5-840000	+	829	10086	25	0.069862	-59.301529	0	19	0.069862	1900	-40.385278	1794	1596	-1.89951	600	600	22	0.695646	4.9633007860214e-07	0.629152	0.000251650329048443
16046000	16048000	AT5G40100	NA	Chr5	16043928	16047355	0.568966	0.622943	16020000	16022000	AT5G40010	Chr5	16020217	16021762	0.917872	1.07618	yes	1500	interaction375447	5-16046000	+	2095	5-16020000	+	1083	25755	15	0.069862	-28.919843	0	15	0.094843	1104.908211	-28.878456	3585	2109	-1.8985	395.091789	395.092	10	-2.58999	1.18678703549108e-28	-5.36772	7.62710010642263e-15
2206000	2208000	AT1G07180	yes	Chr1	2204319	2206934	0.714685	0.714801	2202000	2204000	AT1G07175	Chr1	2202329	2202774	4.09615	3.55799	yes	3600	interaction7754	1-2206000	+	1332	1-2202000	+	456	3500	36	0.069862	-98.035408	0	29	0.069862	2900	-72.612221	2228	983	-1.89643	700	700	36	7.05513	6.94723710227099e-94	-3.85582	2.62699921365285e-05
6816000	6818000	AT3G19620	NA	Chr3	6815612	6818308	0.554619	0.549818	6798000	6800000	AT3G19570	Chr3	6797484	6801740	0.675094	0.649543	NA	1500	interaction195118	3-6816000	+	2209	3-6798000	+	1378	17769	15	0.069862	-28.901605	0	17	0.107466	1105.139198	-34.502695	3873	2212	-1.89576	394.860802	394.861	10	3.3327	5.21665031848044e-09	1.12971	3.86704846049311e-11
24418000	24420000	AT1G65660	yes	Chr1	24418106	24421292	0.862374	0.885667	24374000	24376000	AT1G65570	Chr1	24374097	24375846	3.56632	3.84487	yes	1300	interaction82347	1-24418000	+	1759	1-24374000	+	1566	43833	13	0.069862	-23.520986	1e-06	11	0.082352	933.169399	-18.434954	2389	2748	-1.89295	366.830601	366.831	8	0.661344	2.52718171461493e-08	-5.7582	5.63977158133075e-18
4288000	4290000	AT3G13275	NA	Chr3	4289193	4289842	0.707133	0.942242	4276000	4278000	AT3G13240	Chr3	4275759	4276240	0.869841	0.719986	NA	3600	interaction186213	3-4288000	+	839	3-4276000	+	993	11237	36	0.069862	-97.412852	0	29	0.069862	2900	-72.532933	1232	1517	-1.89179	700	700	36	-0.5099	0.0213703697866885	0.829511	0.00109012679558408
9122000	9124000	AT3G25030	NA	Chr3	9122196	9123502	0.687088	0.74192	9118000	9120000	AT3G25020	Chr3	9116867	9119540	0.36758	0.37463	NA	1000	interaction203065	3-9122000	+	820	3-9118000	+	224	4467	10	0.069862	-16.175197	0.000708	6	0.069862	600	-7.458183	1384	348	-1.89074	400	400	6	0.566821	0.0117582041441964	0.774277	0.00285494211672073
8786000	8788000	AT2G20360	yes	Chr2	8785987	8789473	0.826622	0.766304	8778000	8780000	AT2G20340	Chr2	8779734	8782772	0.876104	0.987124	yes	1000	interaction133468	2-8786000	+	940	2-8778000	+	336	8438	10	0.069862	-16.119466	0.000744	6	0.069862	600	-7.447624	1691	537	-1.88651	400	400	6	-0.341632	0.00019025643004537	1.62803	7.73030852265257e-06
14864000	14866000	AT2G35310	NA	Chr2	14864854	14866598	0.720572	0.741282	14850000	14852000	AT2G35260	Chr2	14849535	14851969	0.826208	0.792914	NA	1000	interaction154862	2-14864000	+	262	2-14850000	+	994	13825	10	0.069862	-16.150868	0.000724	6	0.069862	600	-7.446828	560	1786	-1.8862	400	400	6	1.5115	0.00614243114258383	5.77801	9.99351019790634e-223
12896000	12898000	AT2G30230	yes	Chr2	12897070	12897885	1.40127	2.71572	12886000	12888000	AT2G30210	Chr2	12887445	12889874	1.81469	1.82266	yes	1000	interaction147710	2-12896000	+	553	2-12886000	+	893	9773	10	0.069862	-16.076176	0.000762	6	0.069862	600	-7.441423	790	1566	-1.88405	400	400	6	0.556569	0.0464688742855416	-4.80122	2.3844137792559e-22
12694000	12696000	AT2G29690	NA	Chr2	12693870	12696975	0.705327	0.670495	12684000	12686000	AT2G29670	Chr2	12681957	12685087	0.818327	0.87505	NA	1000	interaction146931	2-12694000	+	1346	2-12684000	+	624	10258	10	0.069862	-16.06859	0.000763	6	0.069862	600	-7.440729	1942	834	-1.88377	400	400	6	1.05712	1.310796696904e-07	5.03881	9.41713087699423e-104
11866000	11868000	AT2G27860	NA	Chr2	11864392	11866907	0.787061	0.816781	11852000	11854000	AT2G27810	Chr2	11852079	11856291	0.748767	0.702142	NA	1000	interaction143939	2-11866000	+	946	2-11852000	+	562	13712	10	0.069862	-16.075108	0.000762	6	0.069862	600	-7.440424	1534	855	-1.88365	400	400	6	0.433628	0.0425473461019134	1.37461	8.88550918157947e-18
18222000	18224000	AT5G45105	yes	Chr5	18223452	18224946	3.09371	3.54836	18182000	18184000	AT5G45060	Chr5	18182037	18186495	0.741297	0.64135	NA	1000	interaction382394	5-18222000	+	582	5-18182000	+	2044	39848	10	0.069862	-16.072853	0.000763	6	0.069862	600	-7.438304	1036	2936	-1.88281	400	400	6	-5.47019	1.46016089986977e-11	1.15985	1.05861556193097e-11
24400000	24402000	AT1G65620	yes	Chr1	24398142	24400969	4.5951	5.51269	24388000	24390000	AT1G65590	Chr1	24385899	24391207	0.79104	0.944002	NA	1000	interaction82281	1-24400000	+	772	1-24388000	+	681	11687	10	0.069862	-16.063651	0.000763	6	0.069862	600	-7.437765	1274	1095	-1.8826	400	400	6	2.9509	3.05732143696332e-16	0.489839	0.020241581747878
2414000	2416000	AT3G07565	NA	Chr3	2413639	2416284	0.845375	0.741445	2406000	2408000	AT3G07540	Chr3	2404508	2407541	0.655114	0.645213	yes	1000	interaction179180	3-2414000	+	818	3-2406000	+	688	8040	10	0.069862	-16.063101	0.000763	6	0.069862	600	-7.436966	1533	1196	-1.88228	400	400	6	0.497757	2.19709852704713e-07	1.87828	5.06055040204415e-23
17090000	17092000	AT2G40950	NA	Chr2	17087619	17090424	0.687287	0.652488	17080000	17082000	AT2G40930	Chr2	17076311	17082433	0.832941	0.728664	NA	1000	interaction162485	2-17090000	+	758	2-17080000	+	747	10065	10	0.069862	-16.058878	0.000763	6	0.069862	600	-7.436519	1404	1261	-1.8821	400	400	6	-0.586684	0.000101915021353515	0.248596	0.0131024394867963
734000	736000	AT1G03080	NA	Chr1	731610	738056	0.670108	0.688894	720000	722000	AT1G03060	Chr1	712472	726891	0.71105	0.640518	NA	1000	interaction2371	1-734000	+	754	1-720000	+	1489	13702	10	0.069862	-16.058421	0.000763	6	0.069862	600	-7.43648	1267	2384	-1.88209	400	400	6	-1.12717	3.01299459744814e-09	-0.531658	0.00200253536972067
17830000	17832000	AT1G48270	yes	Chr1	17827952	17830420	0.696496	0.71355	17814000	17816000	AT1G48260	Chr1	17813975	17817283	0.78999	0.790007	yes	1000	interaction59761	1-17830000	+	765	1-17814000	+	1367	15981	10	0.069862	-16.05772	0.000763	6	0.069862	600	-7.43614	1322	2168	-1.88195	400	400	6	-0.27467	0.0371425626593999	1.69354	1.75860235568086e-13
1154000	1156000	AT3G04350	NA	Chr3	1153726	1156776	0.745044	0.860773	1134000	1136000	AT3G04290	Chr3	1133319	1136316	2.81575	3.79361	yes	1000	interaction175058	3-1154000	+	1353	3-1134000	+	789	20199	10	0.069862	-16.056259	0.000763	6	0.069862	600	-7.436076	2648	1333	-1.88193	400	400	6	-1.08303	0.000113703192826579	8.02325	1.2463442328205e-237
12588000	12590000	AT2G29300	NA	Chr2	12588190	12589759	0.873438	1.23923	12550000	12552000	AT2G29200	Chr2	12548930	12553433	0.550589	0.553432	NA	1000	interaction146466	2-12588000	+	1229	2-12550000	+	1815	37890	10	0.069862	-16.039614	0.000763	6	0.069862	600	-7.435677	1405	2870	-1.88177	400	400	6	6.08807	9.13986896339878e-54	-0.965202	1.09116156298038e-06
8208000	8210000	AT3G23080	NA	Chr3	8207286	8209329	0.779449	0.70506	8194000	8196000	AT3G23050	Chr3	8194678	8197153	3.51802	3.26539	yes	1000	interaction200167	3-8208000	+	855	3-8194000	+	909	13913	10	0.069862	-16.052665	0.000763	6	0.069862	600	-7.43539	1486	1462	-1.88166	400	400	6	1.37186	1.10050421531153e-15	2.07193	4.69578170846944e-23
8316000	8318000	AT5G24360	NA	Chr5	8316439	8319981	0.791918	0.681086	8298000	8300000	AT5G24340	Chr5	8297304	8300374	0.816155	0.735658	NA	1000	interaction348714	5-8316000	+	872	5-8298000	+	1151	17935	10	0.069862	-16.051828	0.000763	6	0.069862	600	-7.435206	1501	1958	-1.88158	400	400	6	-0.422663	0.00102228610660156	0.459265	0.000141987717613109
26380000	26382000	AT5G65950	yes	Chr5	26380122	26385221	0.757906	0.690265	26362000	26364000	AT5G65910	Chr5	26361439	26363460	0.801287	0.865211	NA	1000	interaction408958	5-26380000	+	1289	5-26362000	+	789	18077	10	0.069862	-16.056259	0.000763	6	0.069862	600	-7.435142	2146	1515	-1.88156	400	400	6	-0.268856	0.0162691464614521	-0.20877	0.0310008904801185
20152000	20154000	AT3G54440	yes	Chr3	20148291	20157138	0.809938	0.71031	20130000	20132000	AT3G54360	Chr3	20128304	20131854	0.884723	0.81878	NA	1000	interaction243522	3-20152000	+	1397	3-20130000	+	835	21951	10	0.069862	-16.053694	0.000763	6	0.069862	600	-7.435098	2129	1525	-1.88154	400	400	6	0.73759	8.19679802834876e-21	1.79588	9.29636533597355e-31
17948000	17950000	AT1G48540	NA	Chr1	17945375	17950521	0.769803	0.661582	17932000	17934000	AT1G48500	Chr1	17931475	17934662	1.63291	1.92921	yes	1000	interaction60159	1-17948000	+	975	1-17932000	+	1280	16046	10	0.069862	-16.047382	0.000763	6	0.069862	600	-7.434988	1550	2836	-1.8815	400	400	6	1.07466	3.26691132373036e-12	-3.74518	1.25061329402822e-34
10062000	10064000	AT4G18170	yes	Chr4	10061372	10062841	4.33983	5.07112	10040000	10042000	AT4G18120	Chr4	10038125	10042248	0.692516	0.655401	NA	1000	interaction290968	4-10062000	+	874	4-10040000	+	1711	21305	10	0.069862	-16.051732	0.000763	6	0.069862	600	-7.434783	1599	2647	-1.88142	400	400	6	1.99327	8.091922044438e-08	-0.405315	0.00390350535517132
7016000	7018000	AT3G20090	NA	Chr3	7015796	7018360	0.563059	0.608804	6994000	6996000	AT3G20040	Chr3	6994893	6998171	0.736193	0.666814	NA	1000	interaction195834	3-7016000	+	2058	3-6994000	+	777	21626	10	0.069862	-16.056978	0.000763	6	0.069862	600	-7.434771	3305	1602	-1.88141	400	400	6	-2.50118	2.91574966655281e-36	-0.921186	1.92463334278304e-08
20112000	20114000	AT5G49570	yes	Chr5	20111858	20116185	0.815619	0.751116	20082000	20084000	AT5G49510	Chr5	20080613	20082921	0.936334	0.831464	yes	1000	interaction388766	5-20112000	+	1052	5-20082000	+	944	30213	10	0.069862	-16.048618	0.000763	6	0.069862	600	-7.434328	1820	1720	-1.88124	400	400	6	-0.44052	0.000346936860853747	-0.331453	0.000421282568962854
750000	752000	AT3G03250	yes	Chr3	749389	754159	1.00473	0.831149	736000	738000	AT3G03200	Chr3	736140	738527	4.00063	4.25313	yes	1000	interaction173620	3-750000	+	1023	3-736000	+	962	14297	10	0.069862	-16.047891	0.000763	6	0.069862	600	-7.434318	1723	2005	-1.88123	400	400	6	-0.6261	1.4699268489359e-09	-0.772042	0.00715065511023148
18524000	18526000	AT4G39950	yes	Chr4	18525245	18527579	3.79967	3.50424	18508000	18510000	AT4G39900	Chr4	18508369	18510553	0.72702	0.632473	NA	1000	interaction319845	4-18524000	+	961	4-18508000	+	1076	16229	10	0.069862	-16.04793	0.000763	6	0.069862	600	-7.434318	1805	1723	-1.88123	400	400	6	-2.21337	1.09048411276042e-15	1.35792	3.81112437315686e-16
23746000	23748000	AT1G64000	yes	Chr1	23747303	23749053	3.57881	4.50172	23726000	23728000	AT1G63930	Chr1	23727890	23729333	1.6398	2.27813	yes	1000	interaction79766	1-23746000	+	1371	1-23726000	+	947	20064	10	0.069862	-16.048495	0.000763	6	0.069862	600	-7.434185	2423	1762	-1.88118	400	400	6	-4.73954	2.2405244397939e-21	-2.38904	2.38808491964113e-11
25516000	25518000	AT5G63760	yes	Chr5	25515877	25517833	0.914476	0.770281	25494000	25496000	AT5G63700	Chr5	25493716	25497632	0.733124	0.618713	NA	1000	interaction406532	5-25516000	+	913	5-25494000	+	1321	22186	10	0.069862	-16.049938	0.000763	6	0.069862	600	-7.434119	1782	1923	-1.88115	400	400	6	-1.21544	0.000889980939831011	1.93543	6.56487099522947e-11
17162000	17164000	AT4G36270	yes	Chr4	17161023	17165241	1.06083	1.56075	17128000	17130000	AT4G36195	Chr4	17126931	17129946	0.695875	0.682356	NA	1000	interaction315723	4-17162000	+	1293	4-17128000	+	1524	34131	10	0.069862	-16.038139	0.000763	6	0.069862	600	-7.433863	1864	2070	-1.88105	400	400	6	1.65065	0.000107499271056526	-0.346941	0.0206838321197364
21458000	21460000	AT5G52910	NA	Chr5	21457626	21463159	0.64362	0.608532	21420000	21422000	AT5G52860	Chr5	21419775	21421567	0.71155	0.880485	yes	1000	interaction393279	5-21458000	+	1355	5-21420000	+	1283	38266	10	0.069862	-16.03836	0.000763	6	0.069862	600	-7.433554	1974	2030	-1.88093	400	400	6	1.27553	0.00042239266383781	5.9719	5.97731739844513e-67
12082000	12084000	AT4G23050	NA	Chr4	12080059	12084256	0.749882	0.730292	12056000	12058000	AT4G23000	Chr4	12054454	12060028	0.607593	0.60245	NA	1000	interaction297529	4-12082000	+	1324	4-12056000	+	1711	25828	10	0.069862	-16.037476	0.000763	6	0.069862	600	-7.433394	2036	2386	-1.88087	400	400	6	-1.37574	2.89096733369068e-51	1.41827	1.06641261517223e-05
6642000	6644000	AT5G19660	NA	Chr5	6642003	6646530	0.695813	0.668136	6598000	6600000	AT5G19550	Chr5	6598016	6601819	0.787098	0.786772	NA	1000	interaction343025	5-6642000	+	1422	5-6598000	+	1183	43711	10	0.069862	-16.040772	0.000763	6	0.069862	600	-7.433242	2325	2099	-1.88081	400	400	6	-0.29122	0.00828337450458761	-1.07897	2.78593145917428e-05
23654000	23656000	AT1G63750	yes	Chr1	23650847	23655363	0.989777	0.962033	23628000	23630000	AT1G63700	Chr1	23624665	23629112	0.84574	0.707138	yes	900	interaction79460	1-23654000	+	1660	1-23628000	+	1529	25303	9	0.069862	-13.716151	0.007132	6	0.074466	562.906846	-7.432686	2366	2509	-1.88059	337.093154	337.093	4	2.68573	2.21561601326895e-34	0.430874	0.000901994317630334
16288000	16290000	AT4G33985	NA	Chr4	16288111	16288913	0.753855	0.734271	16284000	16286000	AT4G33980	Chr4	16282695	16285059	0.745403	0.713242	NA	1700	interaction312835	4-16288000	+	352	4-16284000	+	541	3775	17	0.069862	-34.79637	0	12	0.069862	1200	-21.002455	589	962	-1.87508	500	500	12	-1.29407	6.40103982802119e-08	-1.77005	6.81868314319576e-06
21532000	21534000	AT5G53110	yes	Chr5	21529021	21533159	0.978044	0.891781	21524000	21526000	AT5G53090	Chr5	21523378	21525697	0.706302	0.752112	NA	2600	interaction393565	5-21532000	+	424	5-21524000	+	1380	8055	26	0.069862	-62.948424	0	20	0.069862	2000	-43.496066	827	2572	-1.87057	600	600	22	-4.12225	1.5023053142097e-16	-1.26954	3.92242126472599e-06
5840000	5842000	AT4G09160	NA	Chr4	5839682	5842394	0.662691	0.679989	5828000	5830000	AT4G09150	Chr4	5828518	5833676	0.802341	0.700566	NA	1700	interaction276934	4-5840000	+	828	4-5828000	+	514	11693	17	0.069862	-34.685259	0	12	0.069862	1200	-20.9722	1334	863	-1.87041	500	500	12	1.12265	6.29026682654818e-11	0.72946	1.25809466794398e-10
9514000	9516000	AT4G16900	NA	Chr4	9511858	9516541	0.627999	0.562104	9504000	9506000	AT4G16890	Chr4	9500505	9505455	0.596102	0.578236	NA	1700	interaction289152	4-9514000	+	1554	4-9504000	+	854	9926	17	0.069862	-34.590149	0	12	0.069862	1200	-20.970444	1841	887	-1.87014	500	500	12	1.16585	7.73801154939317e-22	2.55938	2.02741479868906e-44
2136000	2138000	AT3G06770	NA	Chr3	2134799	2137228	0.724152	0.65039	2128000	2130000	AT3G06750	Chr3	2129622	2130315	0.58916	0.69966	NA	1700	interaction178279	3-2136000	+	859	3-2128000	+	557	7483	17	0.069862	-34.666744	0	12	0.069862	1200	-20.968715	1188	912	-1.86987	500	500	12	1.7527	3.03586626661738e-36	2.39604	2.45514712667275e-103
8076000	8078000	AT5G23940	yes	Chr5	8076328	8079793	2.50969	2.12473	8070000	8072000	AT5G23910	Chr5	8068451	8072991	0.68396	0.66247	NA	1700	interaction347887	5-8076000	+	590	5-8070000	+	585	6009	17	0.069862	-34.656167	0	12	0.069862	1200	-20.963598	1100	995	-1.86909	500	500	12	3.5579	4.63522810189601e-49	1.14635	1.17981893571805e-06
5966000	5968000	AT3G17430	NA	Chr3	5965922	5969233	0.786329	0.752815	5960000	5962000	AT3G17420	Chr3	5959211	5962179	0.656212	0.754001	NA	1700	interaction191854	3-5966000	+	592	3-5960000	+	671	5578	17	0.069862	-34.653681	0	12	0.069862	1200	-20.960203	1059	1312	-1.86857	500	500	12	-0.30763	0.00673038558267232	-2.56283	2.17855993834834e-101
4680000	4682000	AT1G13650	yes	Chr1	4680431	4682196	1.11816	1.7164	4674000	4676000	AT1G13635	Chr1	4674151	4676170	1.1555	1.73252	yes	1700	interaction16447	1-4680000	+	740	1-4674000	+	716	5797	17	0.069862	-34.617766	0	12	0.069862	1200	-20.954555	1186	1282	-1.8677	500	500	12	7.05977	2.83068299585813e-20	-3.61353	1.52675174917209e-17
8170000	8172000	AT1G23060	NA	Chr1	8170754	8172992	0.796724	0.77857	8156000	8158000	AT1G23030	Chr1	8156645	8159077	0.767598	0.869238	NA	1700	interaction28555	1-8170000	+	767	1-8156000	+	1026	14125	17	0.069862	-34.606392	0	12	0.069862	1200	-20.954357	1191	1541	-1.86767	500	500	12	-1.11301	0.00353190638567175	0.603634	0.0138159711194554
2490000	2492000	AT4G04910	yes	Chr4	2489416	2495766	0.781356	0.783627	2480000	2482000	AT4G04890	Chr4	2476488	2482345	2.47839	3.36641	yes	1700	interaction264472	4-2490000	+	748	4-2480000	+	936	9950	17	0.069862	-34.610447	0	12	0.069862	1200	-20.953431	1215	1450	-1.86753	500	500	12	-0.577601	4.97832866191823e-09	3.71555	2.38230583741627e-36
14610000	14612000	AT2G34660	NA	Chr2	14602469	14612565	0.706251	0.649278	14582000	14584000	AT2G34640	Chr2	14581885	14584699	0.700355	0.608909	yes	3200	interaction153940	2-14610000	+	1969	2-14582000	+	1547	28284	32	0.069862	-82.830293	0	38	0.10087	2631.871677	-104.228304	3432	2343	-1.86632	568.128323	568.128	30	-0.762732	0.0297161577082012	2.77162	9.68297091642039e-52
4118000	4120000	AT5G13000	NA	Chr5	4110294	4121427	0.806456	0.697912	4102000	4104000	AT5G12970	Chr5	4102134	4105327	0.523779	0.586069	NA	1600	interaction334153	5-4118000	+	1075	5-4102000	+	2255	15921	16	0.069862	-31.710062	0	12	0.074276	1128.691179	-20.942605	1590	3724	-1.86587	471.308821	471.309	10	0.52573	0.0384692802884094	-3.54154	7.74384335671615e-56
22526000	22528000	AT1G61120	yes	Chr1	22523636	22528811	3.94843	4.58857	22496000	22498000	AT1G61080	Chr1	22493193	22497019	1.04269	1.57518	yes	1700	interaction75592	1-22526000	+	1274	1-22496000	+	1153	30444	17	0.069862	-34.553112	0	12	0.069862	1200	-20.936721	2148	1911	-1.86498	500	500	12	6.32682	2.48202157742411e-06	-5.05803	4.20739106982486e-14
1356000	1358000	AT3G04910	NA	Chr3	1354634	1358219	0.770849	0.708009	1334000	1336000	AT3G04850	Chr3	1331945	1335993	0.58322	0.595057	NA	1500	interaction175668	3-1356000	+	1570	3-1334000	+	1515	22152	15	0.069862	-28.895559	0	12	0.077449	1082.446497	-20.930846	2579	2394	-1.86408	417.553503	417.554	10	1.62926	4.15503710914667e-60	-0.681978	0.000819388896397152
8008000	8010000	AT4G13820	yes	Chr4	8007988	8010745	0.848008	0.956719	7990000	7992000	AT4G13770	Chr4	7990484	7992311	2.0369	2.53059	yes	1500	interaction283792	4-8008000	+	1729	4-7990000	+	1533	17366	15	0.069862	-28.894846	0	12	0.078231	1071.629062	-20.930177	2530	2465	-1.86398	428.370938	428.371	10	1.38368	0.0249424961039855	2.18126	3.31822667779865e-09
15814000	15816000	AT4G32790	NA	Chr4	15812094	15814987	0.856838	0.749436	15806000	15808000	AT4G32770	Chr4	15804913	15807982	0.740723	0.707769	yes	3700	interaction311106	4-15814000	+	1124	4-15806000	+	1056	7357	37	0.069862	-100.90838	0	30	0.069862	3000	-75.902274	1479	1541	-1.86396	700	700	36	0.309865	0.0354452571127243	2.99263	7.14670261195954e-19
17076000	17078000	AT3G46400	yes	Chr3	17073195	17077328	1.57079	2.20451	17054000	17056000	AT3G46370	Chr3	17051954	17055514	2.93096	3.06132	yes	2506.384301	interaction232855	3-17076000	+	1562	3-17054000	+	2423	21872	28	0.078046	-69.08113	0	20	0.072149	1936.614302	-43.375049	1953	2945	-1.86031	569.769999	569.77	24	-5.59772	2.67519618637992e-12	5.91371	1.91642207923984e-21
1758000	1760000	AT1G05830	NA	Chr1	1754243	1761817	0.791714	0.70868	1736000	1738000	AT1G05790	Chr1	1732870	1737489	0.794049	0.670108	NA	2000	interaction6040	1-1758000	+	2466	1-1736000	+	1240	22082	20	0.069862	-43.426007	0	22	0.09886	1554.690764	-49.529266	3822	2062	-1.85108	445.309236	445.309	16	0.431578	0.0033282377500411	0.707361	8.74545952211293e-10
3566000	3568000	AT3G11385	yes	Chr3	3566577	3568878	1.32746	1.95587	3562000	3564000	AT3G11370	Chr3	3561098	3562880	1.26104	2.3632	yes	8367.587308	interaction183598	3-3566000	+	2006	3-3562000	+	2422	4319	120	0.100189	-462.377181	0	278	0.254759	7623.529452	-1300.495887	4210	4824	-1.84065	744.057856	744.058	172	-6.55376	6.75041685557771e-20	-5.60678	1.40498815679965e-18
20692000	20694000	AT1G55420	yes	Chr1	20691774	20693952	2.79663	2.90294	20680000	20682000	AT1G55390	Chr1	20680875	20683043	2.49412	2.42857	yes	4028.006941	interaction69447	1-20692000	+	2412	1-20680000	+	1883	11870	54	0.093658	-166.04113	0	102	0.204223	3489.282045	-375.403557	4577	3557	-1.83252	538.724896	538.725	62	-4.58703	4.29335823796162e-41	-2.989	1.96115367517886e-13
3818000	3820000	AT1G11350	NA	Chr1	3817590	3820805	0.572867	0.57004	3808000	3810000	AT1G11320	Chr1	3807127	3808875	0.683393	0.607345	NA	1800	interaction13594	1-3818000	+	2026	1-3808000	+	485	9889	18	0.069862	-37.626683	0	13	0.069862	1300	-23.564792	2770	774	-1.816	500	500	14	3.0341	7.00852054935795e-71	0.548953	0.0213769156975509
732000	734000	AT1G03080	NA	Chr1	731610	738056	0.670108	0.688894	716000	718000	AT1G03060	Chr1	712472	726891	0.71105	0.640518	NA	2740.990572	interaction2358	1-732000	+	1366	1-716000	+	2624	15785	29	0.073915	-72.502318	0	35	0.10893	2244.718646	-93.349227	2340	3711	-1.81542	496.271926	496.272	26	-1.12717	3.01299459744814e-09	-0.531658	0.00200253536972067
17132000	17134000	AT1G45207	NA	Chr1	17130350	17133548	0.757656	0.710848	17118000	17120000	AT1G45191	Chr1	17116043	17119174	0.839963	1.4191	yes	1800	interaction57105	1-17132000	+	1020	1-17118000	+	788	14120	18	0.069862	-37.516121	0	13	0.069862	1300	-23.534673	1501	1186	-1.81207	500	500	14	1.04928	9.47391776707462e-05	5.47788	1.85429646054449e-39
19486000	19488000	AT3G52535	NA	Chr3	19487128	19488556	0.968035	1.04999	19474000	19476000	AT3G52525	Chr3	19475158	19475961	2.77184	3.65911	yes	1800	interaction241289	3-19486000	+	733	3-19474000	+	1062	11819	18	0.069862	-37.529338	0	13	0.069862	1300	-23.533737	1206	1481	-1.81194	500	500	14	0.707137	0.0446676800346006	3.90659	1.35583195347222e-23
18864000	18866000	AT5G46510	NA	Chr5	18860450	18867013	0.427247	0.432812	18848000	18850000	AT5G46470	Chr5	18842700	18849741	0.82341	0.673445	NA	1800	interaction384645	5-18864000	+	1318	5-18848000	+	1231	15472	18	0.069862	-37.452957	0	13	0.069862	1300	-23.523345	1877	1484	-1.81059	500	500	14	0.703522	0.0235165605123907	0.726949	0.00168750164222977
24810000	24812000	AT5G61740	yes	Chr5	24808483	24812597	0.879948	1.34304	24784000	24786000	AT5G61670	Chr5	24783503	24785945	0.814418	0.788611	NA	1800	interaction404307	5-24810000	+	1540	5-24784000	+	1172	25813	18	0.069862	-37.458597	0	13	0.069862	1300	-23.512764	2619	1940	-1.80923	500	500	14	4.50055	9.85425875934586e-14	1.46539	1.09437960050878e-17
9158000	9160000	AT2G21400	yes	Chr2	9158389	9159701	1.02961	1.46566	9142000	9144000	AT2G21380	Chr2	9141630	9149309	0.853107	0.707025	NA	1800	interaction134855	2-9158000	+	1191	2-9142000	+	1402	16228	18	0.069862	-37.45672	0	13	0.069862	1300	-23.509903	2116	2191	-1.80886	500	500	14	-3.25923	1.73581170613081e-05	1.47615	3.39453773664615e-10
13180000	13182000	AT4G25960	yes	Chr4	13177408	13183631	0.897734	1.03828	13156000	13158000	AT4G25880	Chr4	13154707	13159382	0.708114	0.739393	NA	1441.477668	interaction301796	4-13180000	+	1768	4-13156000	+	1994	23743	15	0.072698	-28.886865	0	16	0.103507	1079.919129	-31.65175	2622	3147	-1.80467	361.558539	361.559	10	4.96418	8.69686277185249e-89	-0.217684	0.0358622865777669
9512000	9514000	AT4G16900	NA	Chr4	9511858	9516541	0.627999	0.562104	9504000	9506000	AT4G16890	Chr4	9500505	9505455	0.596102	0.578236	NA	2800	interaction289140	4-9512000	+	2110	4-9504000	+	854	8077	28	0.069862	-69.271054	0	22	0.069862	2200	-49.666196	2584	887	-1.80307	600	600	24	1.16585	7.73801154939317e-22	2.55938	2.02741479868906e-44
18508000	18510000	AT4G39900	NA	Chr4	18508369	18510553	0.72702	0.632473	18502000	18504000	AT4G39870	Chr4	18501876	18504466	0.686965	0.726142	NA	4000	interaction319796	4-18508000	+	1076	4-18502000	+	1212	6392	40	0.069862	-111.994085	0	33	0.069862	3300	-86.314722	1723	1966	-1.795	700	700	40	1.35792	3.81112437315686e-16	-0.342294	0.00739282016229418
22324000	22326000	AT1G60600	NA	Chr1	22324644	22327359	0.759351	0.724998	22314000	22316000	AT1G60590	Chr1	22314169	22316970	0.813352	0.781668	yes	1100	interaction74867	1-22324000	+	294	1-22314000	+	1066	9649	11	0.069862	-18.572561	7e-05	7	0.069862	700	-9.432894	395	1581	-1.78568	400	400	6	4.68511	2.08896480929712e-126	7.08513	3.1823756235235e-48
20550000	20552000	AT3G55430	NA	Chr3	20549598	20552215	0.668224	0.872988	20542000	20544000	AT3G55410	Chr3	20541434	20546034	0.69901	0.716383	NA	4100	interaction245078	3-20550000	+	693	3-20542000	+	2092	8285	41	0.069862	-116.160062	0	34	0.069862	3400	-90.059949	1052	3221	-1.78358	700	700	42	0.819198	3.96530732828091e-11	-0.557267	1.59409648174245e-07
19120000	19122000	AT5G47070	NA	Chr5	19118542	19120909	0.757994	0.797435	19116000	19118000	AT5G47060	Chr5	19116787	19118046	0.727775	0.814025	yes	1100	interaction385313	5-19120000	+	283	5-19116000	+	389	3564	11	0.069862	-18.578741	6.9e-05	7	0.069862	700	-9.424632	500	693	-1.78338	400	400	6	1.7947	3.41414169000203e-17	-1.04247	2.50550728407149e-06
456000	458000	AT4G01050	NA	Chr4	455767	458510	0.712265	0.53066	442000	444000	AT4G01020	Chr4	439085	445168	0.451374	0.413089	NA	1100	interaction256710	4-456000	+	466	4-442000	+	1474	13481	11	0.069862	-18.514222	7.3e-05	7	0.069862	700	-9.419725	594	2032	-1.78202	400	400	6	5.24059	0	0.410132	0.000179935638804866
7638000	7640000	AT5G22860	yes	Chr5	7639317	7642984	1.42054	1.16551	7628000	7630000	AT5G22830	Chr5	7627596	7630993	0.841542	0.707364	NA	1100	interaction346498	5-7638000	+	362	5-7628000	+	1261	10850	11	0.069862	-18.542793	7.1e-05	7	0.069862	700	-9.417333	654	2163	-1.78135	400	400	6	1.26007	1.67869597362474e-06	2.50735	8.39881832528843e-157
10582000	10584000	AT4G19410	NA	Chr4	10580892	10585861	0.809462	0.779006	10574000	10576000	AT4G19390	Chr4	10574767	10576428	0.844492	1.00751	yes	1100	interaction292643	4-10582000	+	851	4-10574000	+	421	8132	11	0.069862	-18.524835	7.2e-05	7	0.069862	700	-9.416131	1311	689	-1.78102	400	400	6	0.470756	2.83772585178351e-05	1.43769	5.67149825443992e-05
29230000	29232000	AT1G77750	yes	Chr1	29230153	29231524	0.775837	0.726919	29224000	29226000	AT1G77740	Chr1	29220537	29224220	0.746307	0.715288	NA	1100	interaction98381	1-29230000	+	678	1-29224000	+	454	6011	11	0.069862	-18.516844	7.3e-05	7	0.069862	700	-9.415778	1221	700	-1.78092	400	400	6	-0.303668	0.00656880265776693	0.438948	3.35061387768985e-07
12512000	12514000	AT2G29120	yes	Chr2	12511291	12515895	2.6238	2.30407	12494000	12496000	AT2G29090	Chr2	12494850	12499723	1.91476	3.36225	yes	1100	interaction146187	2-12512000	+	1753	2-12494000	+	604	18368	11	0.069862	-18.491606	7.4e-05	7	0.069862	700	-9.414444	2367	745	-1.78056	400	400	6	3.11009	8.84571001744571e-10	5.60489	3.66061741036352e-23
862000	864000	AT1G03457	NA	Chr1	860787	864125	0.732555	0.820466	852000	854000	AT1G03440	Chr1	852365	854032	0.659304	0.761245	NA	1100	interaction2813	1-862000	+	761	1-852000	+	444	9368	11	0.069862	-18.519139	7.3e-05	7	0.069862	700	-9.414251	1354	752	-1.7805	400	400	6	-0.808745	1.41526474090621e-06	1.93441	3.13709174299411e-27
24142000	24144000	AT1G64990	NA	Chr1	24139906	24146189	0.856929	0.839314	24132000	24134000	AT1G64960	Chr1	24129917	24134204	0.680221	0.599149	NA	1100	interaction81209	1-24142000	+	486	1-24132000	+	1248	9924	11	0.069862	-18.510142	7.3e-05	7	0.069862	700	-9.413312	788	2040	-1.78024	400	400	6	-0.386508	0.000440063162146396	0.488482	0.00482481975565305
13958000	13960000	AT4G28085	NA	Chr4	13959969	13960574	0.741237	0.837278	13950000	13952000	AT4G28080	Chr4	13948602	13957840	0.772338	0.629519	NA	1100	interaction304826	4-13958000	+	830	4-13950000	+	557	8231	11	0.069862	-18.49804	7.3e-05	7	0.069862	700	-9.412826	1172	808	-1.78011	400	400	6	-0.888771	0.000326878814859991	5.5523	2.59562893815667e-187
11516000	11518000	AT2G26980	NA	Chr2	11514702	11518734	0.862948	0.82394	11508000	11510000	AT2G26970	Chr2	11509720	11511914	0.821661	0.847349	yes	1100	interaction142746	2-11516000	+	677	2-11508000	+	473	7125	11	0.069862	-18.512754	7.3e-05	7	0.069862	700	-9.411566	1149	865	-1.77976	400	400	6	1.21271	0.000107700310386799	0.361682	0.00179867652083209
2772000	2774000	AT5G08560	NA	Chr5	2770873	2774672	0.808131	0.799318	2756000	2758000	AT5G08520	Chr5	2755174	2758362	0.738727	0.708581	NA	1100	interaction329515	5-2772000	+	1354	5-2756000	+	531	15794	11	0.069862	-18.502093	7.3e-05	7	0.069862	700	-9.410646	2213	912	-1.77951	400	400	6	-0.408205	4.61247103977029e-07	1.32605	5.20903848709784e-14
5670000	5672000	AT5G17250	NA	Chr5	5668899	5673516	0.763526	0.66551	5662000	5664000	AT5G17230	Chr5	5659573	5662865	0.780481	0.753069	NA	1100	interaction339540	5-5670000	+	1025	5-5662000	+	509	8462	11	0.069862	-18.505849	7.3e-05	7	0.069862	700	-9.410408	1736	925	-1.77944	400	400	6	-0.375738	0.0129554737762298	4.69416	1.09978644879735e-248
25334000	25336000	AT5G63160	NA	Chr5	25333262	25335485	0.902588	1.07724	25328000	25330000	AT5G63140	Chr5	25328118	25329799	1.01551	1.39269	yes	1100	interaction405947	5-25334000	+	568	5-25328000	+	616	5681	11	0.069862	-18.496438	7.4e-05	7	0.069862	700	-9.410283	932	1079	-1.77941	400	400	6	2.04708	3.66137493503614e-05	2.44667	8.83991226974682e-14
19238000	19240000	AT1G51820	yes	Chr1	19237406	19241883	2.04328	2.14386	19224000	19226000	AT1G51805	Chr1	19220976	19225690	1.62494	2.48797	yes	1100	interaction64647	1-19238000	+	1098	1-19224000	+	829	13337	11	0.069862	-18.470959	7.4e-05	7	0.069862	700	-9.409585	1586	973	-1.77921	400	400	6	1.48462	3.50273617468003e-07	7.1917	1.37600524771529e-223
25572000	25574000	AT1G68230	yes	Chr1	25572184	25572921	1.12791	0.971441	25556000	25558000	AT1G68185	Chr1	25556425	25558522	0.832082	0.714186	yes	1100	interaction86525	1-25572000	+	755	1-25556000	+	760	15817	11	0.069862	-18.476384	7.4e-05	7	0.069862	700	-9.40711	1303	1153	-1.77853	400	400	6	-1.11739	1.36052658943961e-07	0.351411	0.00780035942105662
16470000	16472000	AT5G41140	NA	Chr5	16468433	16472810	0.681865	0.679295	16448000	16450000	AT5G41100	Chr5	16447221	16450881	0.766729	0.833627	NA	1100	interaction376883	5-16470000	+	1874	5-16448000	+	765	21537	11	0.069862	-18.475589	7.4e-05	7	0.069862	700	-9.405727	2900	1286	-1.77815	400	400	6	0.6569	1.72562469695061e-14	0.496978	0.000383813208608797
16930000	16932000	AT2G40540	NA	Chr2	16930863	16934588	0.688538	0.702473	16914000	16916000	AT2G40490	Chr2	16912844	16915177	1.03189	0.824127	yes	1100	interaction161880	2-16930000	+	784	2-16914000	+	1349	16893	11	0.069862	-18.474135	7.4e-05	7	0.069862	700	-9.405598	1300	2107	-1.77812	400	400	6	1.22262	3.75511516796204e-15	3.58532	2.45041769074309e-117
17132000	17134000	AT3G46530	yes	Chr3	17130366	17133338	0.760265	1.17283	17120000	17122000	AT3G46500	Chr3	17120479	17122745	1.43668	1.72965	yes	1100	interaction233161	3-17132000	+	1098	3-17120000	+	1008	11663	11	0.069862	-18.461144	7.4e-05	7	0.069862	700	-9.405463	1315	1737	-1.77808	400	400	6	3.04631	3.50967758041196e-23	-5.43276	7.3727664651329e-54
10474000	10476000	AT1G29920	NA	Chr1	10474783	10475959	0.560829	0.75603	10460000	10462000	AT1G29880	Chr1	10459477	10462801	0.896039	1.0073	NA	1100	interaction36777	1-10474000	+	1132	1-10460000	+	1065	14195	11	0.069862	-18.458714	7.4e-05	7	0.069862	700	-9.405313	1332	1800	-1.77804	400	400	6	8.1071	1.22636583542435e-77	0.76228	3.41864923017016e-05
116000	118000	AT2G01190	yes	Chr2	114974	117640	0.593173	0.639816	96000	98000	AT2G01140	Chr2	94810	96655	0.543175	0.648946	NA	1100	interaction102543	2-116000	+	1758	2-96000	+	773	20461	11	0.069862	-18.474968	7.4e-05	7	0.069862	700	-9.405176	2919	1348	-1.778	400	400	6	-0.881761	0.00655092780172319	-1.33676	4.24058277364321e-33
15168000	15170000	AT4G31210	NA	Chr4	15165155	15172738	0.701061	0.585292	15156000	15158000	AT4G31180	Chr4	15155878	15159589	0.734071	0.738822	NA	1100	interaction308873	4-15168000	+	865	4-15156000	+	863	12095	11	0.069862	-18.46878	7.4e-05	7	0.069862	700	-9.405117	1355	1639	-1.77799	400	400	6	0.94041	0.000130490994215669	-0.378952	9.56297051863952e-06
14770000	14772000	AT2G35050	NA	Chr2	14768723	14775035	0.781053	0.703658	14754000	14756000	AT2G35010	Chr2	14754270	14756323	0.80782	0.721523	NA	1100	interaction154496	2-14770000	+	1665	2-14754000	+	646	16177	11	0.069862	-18.486653	7.4e-05	7	0.069862	700	-9.405092	2605	1358	-1.77798	400	400	6	0.548118	0.000163176453645766	-0.29815	0.0259714642513146
4164000	4166000	AT1G12260	yes	Chr1	4162831	4165852	3.80067	4.54031	4150000	4152000	AT1G12230	Chr1	4147961	4151056	0.820496	0.760077	NA	1100	interaction14829	1-4164000	+	1237	1-4150000	+	844	14015	11	0.069862	-18.469976	7.4e-05	7	0.069862	700	-9.404689	2371	1408	-1.77787	400	400	6	-1.26319	3.14444797827291e-09	0.632438	9.8287399534806e-07
3158000	3160000	AT3G10200	NA	Chr3	3157607	3160188	0.569016	0.566712	3140000	3142000	AT3G10160	Chr3	3139382	3144523	0.804338	0.633392	NA	1100	interaction182037	3-3158000	+	760	3-3140000	+	1531	18623	11	0.069862	-18.475984	7.4e-05	7	0.069862	700	-9.40435	1453	2327	-1.77778	400	400	6	1.3638	1.67763609526925e-06	1.39199	5.51602054523955e-28
17536000	17538000	AT1G47670	yes	Chr1	17536666	17539538	0.916132	0.705209	17508000	17510000	AT1G47620	Chr1	17507941	17509702	0.960547	1.3352	yes	1100	interaction58531	1-17536000	+	1154	1-17508000	+	1957	27747	11	0.069862	-18.455401	7.4e-05	7	0.069862	700	-9.403706	1547	2699	-1.7776	400	400	6	-1.61008	7.00796990346417e-08	-5.87871	7.74665672094261e-12
25392000	25394000	AT1G67730	NA	Chr1	25391459	25393610	0.850105	0.880148	25370000	25372000	AT1G67690	Chr1	25369085	25373730	0.766901	0.707781	NA	1100	interaction85874	1-25392000	+	1437	1-25370000	+	912	21718	11	0.069862	-18.465927	7.4e-05	7	0.069862	700	-9.40368	2140	1551	-1.77759	400	400	6	-0.5294	0.000236508699364736	0.495067	0.00335934046323192
9562000	9564000	AT4G16990	yes	Chr4	9560134	9565555	1.59986	2.69044	9538000	9540000	AT4G16950	Chr4	9538797	9544467	0.398034	0.329196	NA	1100	interaction289368	4-9562000	+	1739	4-9538000	+	1361	23759	11	0.069862	-18.449377	7.4e-05	7	0.069862	700	-9.403617	1790	1561	-1.77757	400	400	6	7.82268	3.13637103124229e-138	2.61975	7.22284784353196e-50
2494000	2496000	AT4G04910	yes	Chr4	2489416	2495766	0.781356	0.783627	2462000	2464000	AT4G04870	Chr4	2461673	2464143	0.643027	0.77319	NA	1100	interaction264490	4-2494000	+	1132	4-2462000	+	1402	32055	11	0.069862	-18.456171	7.4e-05	7	0.069862	700	-9.40299	1667	2342	-1.7774	400	400	6	-0.577601	4.97832866191823e-09	-0.367807	0.0295481583482395
26690000	26692000	AT1G70770	NA	Chr1	26687797	26691277	0.859573	0.775305	26670000	26672000	AT1G70730	Chr1	26668864	26673166	0.848547	0.763787	NA	1100	interaction89890	1-26690000	+	926	1-26670000	+	1048	19926	11	0.069862	-18.465167	7.4e-05	7	0.069862	700	-9.402546	1751	1901	-1.77728	400	400	6	-0.916916	1.1203080106352e-18	0.507732	5.93208391851216e-06
7096000	7098000	AT3G20350	NA	Chr3	7096347	7099767	0.778559	0.736787	7080000	7082000	AT3G20300	Chr3	7079616	7081921	0.798042	0.775245	yes	1100	interaction196249	3-7096000	+	1081	3-7080000	+	1312	15881	11	0.069862	-18.458078	7.4e-05	7	0.069862	700	-9.401662	2045	1947	-1.77704	400	400	6	1.29316	1.18405457049026e-07	2.5611	6.9368548099174e-35
7490000	7492000	AT3G21295	NA	Chr3	7489235	7492602	0.706569	0.733644	7448000	7450000	AT3G21230	Chr3	7448039	7452000	1.07866	0.87314	yes	900	interaction197752	3-7490000	+	2058	3-7448000	+	1082	41558	9	0.069862	-13.723862	0.007132	7	0.080857	604.81033	-9.401569	3272	1970	-1.77701	295.18967	295.19	4	-0.493679	0.000331763465854009	-1.88253	3.76207980676136e-21
12030000	12032000	AT1G33170	yes	Chr1	12027083	12030539	1.02934	0.760788	12006000	12008000	AT1G33110	Chr1	12004926	12008833	1.03993	0.88681	yes	1100	interaction41755	1-12030000	+	1496	1-12006000	+	1252	24154	11	0.069862	-18.4523	7.4e-05	7	0.069862	700	-9.401283	2168	2045	-1.77693	400	400	6	1.06979	4.46687560131066e-05	1.05053	5.70673947032551e-06
2576000	2578000	AT3G08500	yes	Chr3	2576793	2578246	3.81669	4.21808	2552000	2554000	AT3G07990	Chr3	2552476	2554921	0.651831	0.617861	NA	1000	interaction179759	3-2576000	+	1596	3-2552000	+	1323	23994	10	0.069862	-16.037497	0.000763	7	0.074531	656.149004	-9.400956	2779	2138	-1.77684	343.850996	343.851	6	-0.766168	0.0384741908687929	-0.872063	4.60767930101342e-12
22388000	22390000	AT1G60810	NA	Chr1	22388526	22391165	0.694277	0.69863	22386000	22388000	AT1G60800	Chr1	22383452	22387457	0.777678	0.768583	NA	2900	interaction75091	1-22388000	+	748	1-22386000	+	486	2251	29	0.069862	-73.018677	0	23	0.069862	2300	-52.861762	1234	786	-1.77581	600	600	26	-0.896524	1.35592157818194e-28	1.63703	3.56307710118211e-42
21960000	21962000	AT3G59420	NA	Chr3	21959646	21963041	0.54142	0.561177	21954000	21956000	AT3G59410	Chr3	21950187	21959266	0.659878	0.594615	NA	9151.64249	interaction250283	3-21960000	+	2301	3-21954000	+	1641	5698	102	0.077865	-377.114181	0	130	0.109353	8305.298886	-510.547137	3548	2457	-1.77574	846.343604	846.344	140	1.72512	7.53119309471384e-15	0.623349	7.84369318214983e-11
7384000	7386000	AT5G22310	NA	Chr5	7383628	7385734	0.722608	0.797321	7380000	7382000	AT5G22300	Chr5	7379198	7381935	1.5675	2.67807	yes	12400	interaction345552	5-7384000	+	1098	5-7380000	+	2317	4038	124	0.069862	-485.146476	0	129	0.079134	11388.513426	-507.064589	1735	3636	-1.76953	1011.486574	1011.49	180	1.01151	3.17435484028042e-05	2.25654	4.54898515693054e-06
29364000	29366000	AT1G78080	NA	Chr1	29364248	29366073	0.641829	0.936218	29358000	29360000	AT1G78070	Chr1	29355021	29358993	0.747833	0.816819	NA	1900	interaction98721	1-29364000	+	574	1-29358000	+	377	6814	19	0.069862	-40.703283	0	14	0.069862	1400	-26.232097	944	721	-1.76787	500	500	14	-0.664623	0.003761541159186	1.55925	0.00319549164743607
2376000	2378000	AT3G07420	NA	Chr3	2373976	2376744	0.681219	0.598522	2368000	2370000	AT3G07400	Chr3	2367301	2372445	0.755419	0.690101	NA	1900	interaction179080	3-2376000	+	1065	3-2368000	+	449	7531	19	0.069862	-40.635768	0	14	0.069862	1400	-26.22755	1698	752	-1.76736	500	500	14	-0.818202	3.17661294942257e-07	0.818134	5.11456956587091e-09
20692000	20694000	AT1G55420	yes	Chr1	20691774	20693952	2.79663	2.90294	20682000	20684000	AT1G55390	Chr1	20680875	20683043	2.49412	2.42857	yes	4630.486612	interaction69448	1-20692000	+	2412	1-20682000	+	1456	10481	48	0.07242	-142.404641	0	92	0.160646	4000.920172	-329.654773	4577	2798	-1.76714	629.56644	629.566	52	-4.58703	4.29335823796162e-41	-2.989	1.96115367517886e-13
23106000	23108000	AT1G62430	NA	Chr1	23105940	23109476	0.874577	0.785334	23090000	23092000	AT1G62400	Chr1	23090242	23091589	0.782729	0.745878	yes	1900	interaction77610	1-23106000	+	654	1-23090000	+	1996	16499	19	0.069862	-40.525828	0	14	0.069862	1400	-26.195983	1073	3052	-1.7638	500	500	14	0.586409	0.00947311554637318	2.96225	7.2980831647997e-37
16398000	16400000	AT4G34260	NA	Chr4	16398027	16401810	0.690785	0.685407	16392000	16394000	AT4G34240	Chr4	16389619	16392824	0.730427	0.797134	NA	4200	interaction313146	4-16398000	+	1395	4-16392000	+	881	5870	42	0.069862	-119.695355	0	35	0.069862	3500	-93.541329	1753	1308	-1.76016	700	700	44	1.00724	3.02256765904123e-16	1.58819	1.53148552473681e-23
25000000	25002000	AT1G66980	yes	Chr1	24997308	25001983	0.80125	1.88024	24994000	24996000	AT1G66970	Chr1	24992552	24996117	0.818376	1.54751	yes	5700	interaction84447	1-25000000	+	1444	1-24994000	+	1927	6034	57	0.069862	-178.459969	0	49	0.069862	4900	-146.233187	1658	2352	-1.75943	800	800	66	7.38135	0	6.69999	7.76316060686033e-215
24982000	24984000	AT1G66950	yes	Chr1	24978204	24984619	1.66084	2.15792	24974000	24976000	AT1G66940	Chr1	24973027	24974791	0.682063	0.741613	NA	3000	interaction84291	1-24982000	+	1818	1-24974000	+	1138	8039	30	0.069862	-75.985992	0	24	0.069862	2400	-55.946174	2412	1262	-1.74093	600	600	28	-5.02397	7.42142954142439e-14	8.30084	2.67811604995356e-136
5260000	5262000	AT1G15290	NA	Chr1	5257045	5264942	0.790361	0.644168	5244000	5246000	AT1G15240	Chr1	5243449	5248604	0.769633	0.676203	NA	2100	interaction18332	1-5260000	+	1733	1-5244000	+	1763	16109	21	0.069862	-46.444091	0	21	0.087751	1671.898973	-46.410341	2493	2806	-1.7403	428.101027	428.101	16	3.524	1.28436183775593e-38	0.392317	0.0165111911145267
3704000	3706000	AT1G11100	NA	Chr1	3703671	3709302	0.543857	0.607933	3694000	3696000	AT1G11080	Chr1	3694671	3698013	2.96174	2.24063	yes	3000	interaction13223	1-3704000	+	1927	1-3694000	+	1041	9360	30	0.069862	-76.019929	0	30	0.084121	2491.496036	-75.837018	3471	1932	-1.74028	508.503964	508.504	28	-3.1086	1.87450145300632e-75	1.62374	7.344961267774e-10
18850000	18852000	AT5G46490	yes	Chr5	18850775	18853843	0.842107	1.14427	18848000	18850000	AT5G46470	Chr5	18842700	18849741	0.82341	0.673445	NA	4500	interaction384606	5-18850000	+	497	5-18848000	+	1231	2473	45	0.069862	-132.068523	0	38	0.069862	3800	-105.078181	600	1484	-1.73058	700	700	48	4.23768	5.82437180675689e-44	0.726949	0.00168750164222977
26918000	26920000	AT1G71420	NA	Chr1	26917821	26920099	0.662869	0.658892	26910000	26912000	AT1G71400	Chr1	26909834	26912597	1.00449	0.882331	yes	4500	interaction90769	1-26918000	+	2071	1-26910000	+	1270	7639	45	0.069862	-130.856477	0	57	0.102444	3887.138353	-178.01491	3347	2440	-1.72165	612.861647	612.862	48	0.698191	0.0184410824506468	-3.09908	1.22811713671761e-39
14194000	14196000	AT4G28720	yes	Chr4	14192582	14194256	2.20989	1.66349	14178000	14180000	AT4G28710	Chr4	14171997	14181771	0.789213	0.723699	NA	2000	interaction305658	4-14194000	+	709	4-14178000	+	1182	15963	20	0.069862	-43.531228	0	15	0.069862	1500	-28.914047	1162	2178	-1.71954	500	500	16	-1.93821	1.90387967588197e-13	-0.777249	1.52827762428202e-09
22052000	22054000	AT3G59700	NA	Chr3	22052132	22054275	0.600207	0.624232	22036000	22038000	AT3G59660	Chr3	22034170	22038658	0.819907	0.802894	NA	2000	interaction250641	3-22052000	+	1647	3-22036000	+	766	16094	20	0.069862	-43.512878	0	15	0.069862	1500	-28.909474	3365	1233	-1.71909	500	500	16	-2.04227	7.62346965342177e-07	-0.728301	1.57606043261776e-13
20434000	20436000	AT3G55130	yes	Chr3	20433877	20436390	3.19462	4.2781	20424000	20426000	AT3G55110	Chr3	20424549	20427377	3.18409	4.27327	yes	3460.673327	interaction244591	3-20434000	+	2599	3-20424000	+	2147	9566	57	0.115068	-178.102568	0	77	0.17662	3045.74084	-262.41563	4232	3327	-1.70342	414.932487	414.932	66	5.86438	7.5614483398405e-129	5.61368	5.11312067636934e-37
30248000	30250000	AT1G80460	NA	Chr1	30246744	30249305	0.697786	0.635756	30238000	30240000	AT1G80420	Chr1	30235163	30238535	0.696276	0.809423	NA	1200	interaction101731	1-30248000	+	1221	1-30238000	+	375	9570	12	0.069862	-21.057211	6e-06	8	0.069862	800	-11.533782	2226	473	-1.70148	400	400	6	-0.923269	8.45339903870325e-10	1.16203	1.70225882084471e-16
518000	520000	AT2G02080	yes	Chr2	518158	521707	3.17348	4.95858	506000	508000	AT2G02070	Chr2	505486	509425	2.79963	4.29687	yes	1200	interaction103706	2-518000	+	616	2-506000	+	436	11591	12	0.069862	-21.036069	6e-06	8	0.069862	800	-11.52933	773	524	-1.70056	400	400	6	3.21409	5.24490371773112e-175	3.40337	1.32456077584131e-70
18206000	18208000	AT5G45095	NA	Chr5	18207362	18209045	0.640937	0.717446	18202000	18204000	AT5G45090	Chr5	18202752	18205000	2.32335	2.19932	yes	1200	interaction382376	5-18206000	+	403	5-18202000	+	665	4341	12	0.069862	-21.046703	6e-06	8	0.069862	800	-11.518032	722	1194	-1.69824	400	400	6	-2.10859	0.000162032804883707	-4.4407	3.07108583174609e-07
14008000	14010000	AT4G28270	NA	Chr4	14007538	14009019	0.739066	0.797448	14000000	14002000	AT4G28250	Chr4	14000037	14002069	0.785457	0.966868	yes	1200	interaction304990	4-14008000	+	614	4-14000000	+	465	7891	12	0.069862	-21.027982	6e-06	8	0.069862	800	-11.513187	1066	862	-1.69725	400	400	6	0.384114	0.00993814743157441	-1.25381	0.00103621626882276
7758000	7760000	AT4G13340	NA	Chr4	7758609	7761057	0.418386	0.525643	7750000	7752000	AT4G13310	Chr4	7750304	7753133	2.30196	2.10437	yes	1200	interaction282898	4-7758000	+	753	4-7750000	+	976	8438	12	0.069862	-20.981685	7e-06	8	0.069862	800	-11.512133	900	2086	-1.69704	400	400	6	1.17358	0.010675626990055	-5.84363	7.15377954823527e-18
17812000	17814000	AT1G48260	yes	Chr1	17813975	17817283	0.78999	0.790007	17800000	17802000	AT1G48210	Chr1	17798430	17801987	0.739473	0.813427	NA	1200	interaction59691	1-17812000	+	567	1-17800000	+	1575	12474	12	0.069862	-21.006163	6e-06	8	0.069862	800	-11.511165	938	2570	-1.69684	400	400	6	1.69354	1.75860235568086e-13	-0.755455	0.000533152157526636
19184000	19186000	AT1G51720	NA	Chr1	19180771	19186532	0.866672	0.811095	19168000	19170000	AT1G51690	Chr1	19164062	19170449	0.88464	0.821736	NA	1200	interaction64462	1-19184000	+	1096	1-19168000	+	657	15968	12	0.069862	-20.992576	6e-06	8	0.069862	800	-11.509895	1736	993	-1.69658	400	400	6	0.446318	0.000783733428245492	0.453366	1.36147890750461e-06
17408000	17410000	AT2G41730	NA	Chr2	17409462	17409937	0.579536	0.638141	17398000	17400000	AT2G41705	Chr2	17397273	17400081	0.670417	0.624661	NA	1200	interaction163575	2-17408000	+	576	2-17398000	+	1078	9245	12	0.069862	-21.004612	6e-06	8	0.069862	800	-11.509615	1006	1738	-1.69652	400	400	6	1.67254	0.0219382130623154	0.287177	0.0375635725147218
3582000	3584000	AT1G10760	NA	Chr1	3581033	3590928	0.822125	0.619193	3568000	3570000	AT1G10740	Chr1	3567904	3570838	0.708402	0.697763	NA	1200	interaction12743	1-3582000	+	714	1-3568000	+	1488	14303	12	0.069862	-20.985754	7e-06	8	0.069862	800	-11.50924	1024	2502	-1.69644	400	400	6	1.75451	2.63900408842521e-21	1.35579	6.71663898253003e-19
18296000	18298000	AT4G39350	NA	Chr4	18296796	18302192	0.75007	0.653906	18290000	18292000	AT4G39330	Chr4	18291217	18293383	0.715341	0.680684	NA	1200	interaction319164	4-18296000	+	992	4-18290000	+	641	6045	12	0.069862	-20.994711	6e-06	8	0.069862	800	-11.508976	1519	1037	-1.69639	400	400	6	0.394185	0.00198561549001158	4.99329	5.7867387822265e-216
8840000	8842000	AT3G24360	NA	Chr3	8839727	8842831	0.545395	0.64848	8828000	8830000	AT3G24320	Chr3	8822978	8829694	0.703454	0.673888	NA	1200	interaction202213	3-8840000	+	971	3-8828000	+	649	12380	12	0.069862	-20.99363	6e-06	8	0.069862	800	-11.508281	1417	1073	-1.69625	400	400	6	-1.3546	0.00430822178253058	1.03299	9.26596668973657e-05
20824000	20826000	AT5G51230	NA	Chr5	20823735	20829564	0.815109	0.753601	20814000	20816000	AT5G51200	Chr5	20804925	20819592	0.83847	0.781681	NA	1200	interaction391077	5-20824000	+	765	5-20814000	+	933	10171	12	0.069862	-20.980517	7e-06	8	0.069862	800	-11.506716	1164	1281	-1.69593	400	400	6	0.518097	0.000666291908315234	0.632463	0.0121483054205893
23650000	23652000	AT1G63750	yes	Chr1	23650847	23655363	0.989777	0.962033	23636000	23638000	AT1G63720	Chr1	23635855	23637529	0.775339	0.766332	NA	1200	interaction79438	1-23650000	+	1072	1-23636000	+	628	13488	12	0.069862	-20.996526	6e-06	8	0.069862	800	-11.50645	1722	1181	-1.69588	400	400	6	2.68573	2.21561601326895e-34	-1.66488	7.15477314628196e-08
17378000	17380000	AT2G41680	NA	Chr2	17376154	17379055	0.757481	0.700878	17364000	17366000	AT2G41650	Chr2	17363906	17364434	0.835834	0.867034	yes	1200	interaction163458	2-17378000	+	620	2-17364000	+	1092	13827	12	0.069862	-20.997681	6e-06	8	0.069862	800	-11.505669	1234	1897	-1.69572	400	400	6	3.23124	6.01338220619478e-199	-0.508324	0.0399642235741267
18846000	18848000	AT5G46470	NA	Chr5	18842700	18849741	0.82341	0.673445	18826000	18828000	AT5G46410	Chr5	18825102	18829221	0.875906	0.845558	NA	1200	interaction384583	5-18846000	+	1215	5-18826000	+	893	19449	12	0.069862	-20.97002	7e-06	8	0.069862	800	-11.505018	1486	1282	-1.69558	400	400	6	0.726949	0.00168750164222977	-0.937983	3.02444636576268e-05
2446000	2448000	AT5G07690	yes	Chr5	2446763	2448543	2.93738	3.16967	2430000	2432000	AT5G07670	Chr5	2430145	2432196	0.753207	0.690502	NA	1200	interaction328422	5-2446000	+	822	5-2430000	+	769	16086	12	0.069862	-20.980135	7e-06	8	0.069862	800	-11.504329	1337	1354	-1.69545	400	400	6	5.35957	7.01176091805782e-32	0.889043	9.35450619884214e-09
13122000	13124000	AT4G25790	yes	Chr4	13122151	13123347	3.72063	3.80029	13108000	13110000	AT4G25740	Chr4	13107249	13108827	0.82956	0.849691	NA	1200	interaction301584	4-13122000	+	775	4-13108000	+	871	14437	12	0.069862	-20.979571	7e-06	8	0.069862	800	-11.504305	1489	1339	-1.69544	400	400	6	-5.30483	1.66907240516013e-26	0.378659	0.0014512751283507
27844000	27846000	AT1G74040	NA	Chr1	27842170	27845776	0.721075	0.598771	27822000	27824000	AT1G73980	Chr1	27820148	27824036	0.77062	0.678523	NA	1200	interaction93829	1-27844000	+	714	1-27822000	+	1668	21869	12	0.069862	-20.985754	7e-06	8	0.069862	800	-11.503772	1385	2625	-1.69533	400	400	6	1.64601	1.10106238382655e-24	0.249538	0.0276910164499342
2072000	2074000	AT3G06630	NA	Chr3	2070387	2073800	0.48862	0.603189	2042000	2044000	AT3G06550	Chr3	2039063	2042959	0.742473	0.657201	NA	1000	interaction178017	3-2072000	+	2426	3-2042000	+	937	29814	10	0.069862	-16.048908	0.000763	8	0.081959	681.922784	-11.50207	4199	1556	-1.69499	318.077216	318.077	6	-2.36349	1.083283460225e-13	0.209438	0.00839523179112323
19412000	19414000	AT1G52150	yes	Chr1	19409710	19414678	0.935935	1.07179	19372000	19374000	AT1G52080	Chr1	19369130	19372065	0.840843	0.886371	yes	1200	interaction65380	1-19412000	+	1317	1-19372000	+	1187	39727	12	0.069862	-20.954515	7e-06	8	0.069862	800	-11.50091	1944	1699	-1.69475	400	400	6	-0.362029	0.026457534638292	-1.00311	4.85257242766592e-17
17052000	17054000	AT3G46370	yes	Chr3	17051954	17055514	2.93096	3.06132	17022000	17024000	AT3G46330	Chr3	17020746	17025011	1.86259	2.64542	yes	1200	interaction232691	3-17052000	+	1322	3-17022000	+	1512	30003	12	0.069862	-20.949714	7e-06	8	0.069862	800	-11.500669	1732	2181	-1.6947	400	400	6	5.91371	1.91642207923984e-21	-6.21046	3.45338698747857e-31
16914000	16916000	AT2G40490	yes	Chr2	16912844	16915177	1.03189	0.824127	16886000	16888000	AT2G40435	Chr2	16886823	16888638	3.36223	5.04602	yes	1200	interaction161810	2-16914000	+	1349	2-16886000	+	1255	27575	12	0.069862	-20.951967	7e-06	8	0.069862	800	-11.500424	2107	1767	-1.69465	400	400	6	3.58532	2.45041769074309e-117	6.7282	4.50723079565889e-20
10110000	10112000	AT1G28960	yes	Chr1	10109499	10111660	0.857594	0.85135	10086000	10088000	AT1G28710	Chr1	10086599	10089772	0.707127	0.811817	yes	1000	interaction35393	1-10110000	+	952	1-10086000	+	2278	23654	10	0.069862	-16.048291	0.000763	8	0.079804	700.334525	-11.499725	1875	3393	-1.69451	299.665475	299.665	6	-0.401687	0.0435338517766776	1.55002	3.01336743681234e-07
28136000	28138000	AT1G74910	NA	Chr1	28135360	28138826	0.791459	0.672797	28108000	28110000	AT1G74810	Chr1	28108473	28111534	0.648258	0.784776	yes	1100	interaction95013	1-28136000	+	1406	1-28108000	+	1705	27750	11	0.069862	-18.448303	7.4e-05	8	0.070432	793.528566	-11.499097	1984	2830	-1.69438	306.471434	306.471	6	1.46467	1.3736216721811e-31	3.63025	3.11236906844807e-05
6112000	6114000	AT3G17850	yes	Chr3	6109704	6116458	0.768968	0.729792	6094000	6096000	AT3G17810	Chr3	6094097	6096566	0.792369	0.682102	NA	1200	interaction192425	3-6112000	+	1730	3-6094000	+	1109	17450	12	0.069862	-20.957824	7e-06	8	0.069862	800	-11.498873	2571	2026	-1.69434	400	400	6	0.538328	6.06071943954033e-06	-1.51751	5.08801440911128e-35
21330000	21332000	AT1G57600	NA	Chr1	21330511	21334727	0.778056	0.715122	21322000	21324000	AT1G57570	Chr1	21320937	21324637	2.6393	3.45178	yes	2100	interaction71555	1-21330000	+	461	1-21322000	+	1472	8126	21	0.069862	-46.753702	0	16	0.069862	1600	-31.776923	643	2177	-1.68688	500	500	16	-0.523021	2.34009095895288e-05	-4.89304	3.36847505939349e-27
20312000	20314000	AT3G54830	NA	Chr3	20311900	20315030	0.811981	0.712357	20302000	20304000	AT3G54820	Chr3	20302020	20304010	1.17241	1.62271	yes	2100	interaction244150	3-20312000	+	669	3-20302000	+	1420	10203	21	0.069862	-46.621631	0	16	0.069862	1600	-31.719568	981	1996	-1.68189	500	500	16	4.78715	3.78136419416825e-183	1.43294	9.78770576196373e-06
21538000	21540000	AT5G53130	NA	Chr5	21537720	21541029	0.780538	0.722383	21524000	21526000	AT5G53090	Chr5	21523378	21525697	0.706302	0.752112	NA	2100	interaction393586	5-21538000	+	798	5-21524000	+	1380	13504	21	0.069862	-46.574644	0	16	0.069862	1600	-31.696328	1248	2572	-1.67989	500	500	16	1.03822	1.3178191191047e-13	-1.26954	3.92242126472599e-06
12682000	12684000	AT2G29670	NA	Chr2	12681957	12685087	0.818327	0.87505	12674000	12676000	AT2G29650	Chr2	12673382	12676049	0.827699	0.662433	yes	2100	interaction146867	2-12682000	+	1090	2-12674000	+	1171	7293	21	0.069862	-46.509653	0	16	0.069862	1600	-31.681825	1504	1562	-1.67864	500	500	16	5.03881	9.41713087699423e-104	5.05488	4.10718409300393e-138
4448000	4450000	AT1G13040	NA	Chr1	4447646	4449200	0.744425	0.55535	4434000	4436000	AT1G12990	Chr1	4433639	4436075	0.815407	0.75832	NA	1800	interaction15744	1-4448000	+	2356	1-4434000	+	867	13610	18	0.069862	-37.500092	0	16	0.079046	1414.102847	-31.678726	4006	1573	-1.67837	385.897153	385.897	14	-0.54745	0.0361487755970943	1.06327	8.307372301599e-08
17328000	17330000	AT3G47050	yes	Chr3	17328032	17330889	1.26533	1.56955	17314000	17316000	AT3G47000	Chr3	17313645	17316566	0.695972	0.699637	NA	1900	interaction233925	3-17328000	+	1597	3-17314000	+	1242	14261	19	0.069862	-40.412951	0	16	0.076642	1458.449976	-31.664721	3078	1985	-1.67717	441.550024	441.55	14	-6.42586	8.52904847159831e-17	0.423868	2.08464955472606e-07
15816000	15818000	AT5G39500	NA	Chr5	15815273	15820045	0.699163	0.618361	15786000	15788000	AT5G39450	Chr5	15785716	15787946	0.750107	0.881984	yes	1900	interaction374642	5-15816000	+	1953	5-15786000	+	1417	29612	19	0.069862	-40.397534	0	16	0.075772	1475.214285	-31.661965	2886	2093	-1.67694	424.785715	424.786	14	-0.333042	0.00279255120115366	-0.678192	0.000294754872262925
12232000	12234000	AT1G33750	yes	Chr1	12233768	12236476	4.06441	3.94207	12222000	12224000	AT1G33720	Chr1	12220896	12224000	1.74854	2.33957	yes	4700	interaction42535	1-12232000	+	1769	1-12222000	+	1684	10168	47	0.069862	-138.402554	0	50	0.085381	4091.178536	-149.967318	2925	2327	-1.67667	608.821464	608.821	50	-5.24696	1.27185664506085e-11	8.50794	6.02368415030951e-16
23206000	23208000	AT3G62730	yes	Chr3	23207853	23209471	2.80861	2.24924	23192000	23194000	AT3G62700	Chr3	23190266	23195762	0.800413	0.716215	yes	1700	interaction254117	3-23206000	+	1303	3-23192000	+	1770	13438	17	0.069862	-34.540965	0	16	0.085514	1307.150287	-31.656677	2337	2917	-1.67649	392.849713	392.85	12	-2.93643	1.43808732039627e-06	0.666003	6.68589162291557e-09
15710000	15712000	AT4G32551	NA	Chr4	15707480	15713662	0.747858	0.718713	15690000	15692000	AT4G32520	Chr4	15689463	15692857	0.778533	0.740552	NA	1500	interaction310695	4-15710000	+	1440	4-15690000	+	2057	19963	15	0.069862	-28.898726	0	16	0.097598	1145.297152	-31.654781	2439	3190	-1.67632	354.702848	354.703	10	0.346599	0.0291606513104471	0.363447	6.45702174824659e-06
7906000	7908000	AT1G22400	yes	Chr1	7903659	7906673	1.57247	3.18058	7898000	7900000	AT1G22370	Chr1	7898012	7899879	1.42126	1.78586	yes	3300	interaction27683	1-7906000	+	803	1-7898000	+	946	7632	33	0.069862	-86.651938	0	27	0.069862	2700	-65.818042	1106	1396	-1.6705	600	600	32	1.07901	2.05875454788727e-09	2.03553	1.55621272978971e-08
4922000	4924000	AT3G14650	NA	Chr3	4922130	4924694	0.638936	0.57183	4898000	4900000	AT3G14570	Chr3	4892642	4902628	0.809788	0.622274	yes	856.215138	interaction188427	3-4922000	+	1974	3-4898000	+	1804	24111	9	0.073435	-13.71331	0.007132	10	0.116353	600.431339	-16.022678	3250	2854	-1.66771	255.783799	255.784	4	2.04903	7.56109087503768e-66	-1.40591	1.01429426335341e-06
23648000	23650000	AT1G63740	NA	Chr1	23645428	23648973	0.705754	0.666251	23642000	23644000	AT1G63730	Chr1	23641769	23645132	0.774751	0.665389	NA	4800	interaction79432	1-23648000	+	908	1-23642000	+	1215	5761	48	0.069862	-142.866588	0	41	0.069862	4100	-115.543319	1478	1973	-1.66035	700	700	52	-0.361071	0.0109972440689442	-1.29164	2.68921799870403e-22
3280000	3282000	AT3G10525	yes	Chr3	3281361	3282032	1.51332	2.88041	3276000	3278000	AT3G10520	Chr3	3276225	3277860	1.54662	1.70723	yes	2200	interaction182523	3-3280000	+	775	3-3276000	+	509	4885	22	0.069862	-49.846767	0	17	0.069862	1700	-34.604339	1061	777	-1.64914	500	500	18	1.31548	8.6629800784315e-06	3.41852	6.72732033862059e-38
896000	898000	AT1G03590	NA	Chr1	894253	897518	0.696953	0.650642	890000	892000	AT1G03560	Chr1	890155	892410	0.725844	0.686384	NA	4900	interaction2910	1-896000	+	854	1-890000	+	1331	5642	49	0.069862	-146.893756	0	42	0.069862	4200	-119.32639	1434	2147	-1.64688	700	700	54	0.91821	1.0432908563445e-05	0.419062	0.0394030208987599
1948000	1950000	AT1G06390	NA	Chr1	1946787	1950860	0.825928	0.784266	1940000	1942000	AT1G06360	Chr1	1938962	1940459	3.6177	4.8798	yes	2200	interaction6768	1-1948000	+	1713	1-1940000	+	684	8278	22	0.069862	-49.738068	0	17	0.069862	1700	-34.566422	2362	1024	-1.64622	500	500	18	0.554807	6.88707206393669e-14	8.23013	3.91581144654343e-34
8842000	8844000	AT3G24360	NA	Chr3	8839727	8842831	0.545395	0.64848	8834000	8836000	AT3G24340	Chr3	8832084	8835722	0.501095	0.491492	NA	2200	interaction202222	3-8842000	+	727	3-8834000	+	948	7547	22	0.069862	-49.719456	0	17	0.069862	1700	-34.550522	1182	1656	-1.645	500	500	18	-1.3546	0.00430822178253058	1.08604	0.00134582675330011
13696000	13698000	AT4G27370	NA	Chr4	13694880	13700780	0.580986	0.594579	13686000	13688000	AT4G27340	Chr4	13687195	13690469	0.742278	0.747805	NA	2200	interaction303877	4-13696000	+	1493	4-13686000	+	1003	9767	22	0.069862	-49.638292	0	17	0.069862	1700	-34.531858	2283	1444	-1.64357	500	500	18	1.78814	1.21120593084388e-06	2.26192	5.09440029827104e-40
6534000	6536000	AT2G15080	yes	Chr2	6533686	6536995	1.3066	1.63762	6510000	6512000	AT2G15042	Chr2	6510164	6512637	0.99808	1.08176	yes	2200	interaction125507	2-6534000	+	1581	2-6510000	+	1619	24539	22	0.069862	-49.560592	0	17	0.069862	1700	-34.519663	1689	1948	-1.64264	500	500	18	5.5221	1.07322257118287e-113	5.95142	1.05205596153275e-11
21208000	21210000	AT5G52230	NA	Chr5	21207887	21211986	0.757041	0.656621	21198000	21200000	AT5G52170	Chr5	21196973	21199959	0.716323	0.806768	yes	2000	interaction392460	5-21208000	+	1625	5-21198000	+	1431	9811	20	0.069862	-43.407352	0	17	0.07689	1544.615193	-34.499612	2615	2344	-1.64112	455.384807	455.385	16	0.456284	3.25155441070056e-05	-3.44593	1.66354752719832e-09
22858000	22860000	AT5G56450	yes	Chr5	22858508	22860062	0.758865	0.847263	22820000	22822000	AT5G56350	Chr5	22820005	22822766	0.716715	0.758876	NA	1000	interaction397839	5-22858000	+	1349	5-22820000	+	2046	38068	10	0.069862	-16.036964	0.000763	11	0.106433	722.035097	-18.434269	2478	3424	-1.63931	277.964903	277.965	6	0.655662	0.00323779481615589	-1.23117	3.13033986397981e-15
2416000	2418000	AT4G04750	NA	Chr4	2417887	2422624	0.76799	0.829308	2406000	2408000	AT4G04740	Chr4	2403608	2408737	0.718904	0.655473	NA	1300	interaction264261	4-2416000	+	258	4-2406000	+	1417	9396	13	0.069862	-23.740798	0	9	0.069862	900	-13.763315	435	2222	-1.635	400	400	8	1.41137	3.97071198417727e-05	-0.228766	0.00663839019299767
24194000	24196000	AT1G65120	NA	Chr1	24191347	24196073	0.533304	0.576228	24178000	24180000	AT1G65080	Chr1	24176581	24180871	0.64832	0.611159	NA	3600	interaction81402	1-24194000	+	2116	1-24178000	+	1447	15970	36	0.069862	-97.107434	0	38	0.086151	3081.502977	-104.250963	3162	2172	-1.63494	518.497023	518.497	36	-1.17329	0.00141584743954527	-0.36606	0.0432899566510181
22252000	22254000	AT3G60210	NA	Chr3	22251222	22252898	0.679679	0.604629	22248000	22250000	AT3G60200	Chr3	22249256	22250520	0.675975	0.751356	NA	3500	interaction251241	3-22252000	+	859	3-22248000	+	513	3647	35	0.069862	-94.229359	0	29	0.069862	2900	-72.685398	1386	829	-1.63438	600	600	34	1.12489	1.08073511239085e-19	-0.266166	0.0313550948493939
11146000	11148000	AT2G26190	NA	Chr2	11147638	11150510	0.667842	0.719343	11140000	11142000	AT2G26170	Chr2	11140808	11143360	0.68557	0.626434	NA	1300	interaction141595	2-11146000	+	234	2-11140000	+	839	5184	13	0.069862	-23.768278	0	9	0.069862	900	-13.758381	470	1444	-1.63421	400	400	8	0.766566	0.00144838917280388	-1.17604	5.2938284024127e-14
1432000	1434000	AT1G05010	NA	Chr1	1431189	1432858	0.74109	0.953852	1428000	1430000	AT1G05000	Chr1	1425592	1428782	0.808651	0.769084	NA	3500	interaction4826	1-1432000	+	640	1-1428000	+	732	3092	35	0.069862	-94.002455	0	29	0.069862	2900	-72.634193	931	1399	-1.63219	600	600	34	2.45347	2.87914354149867e-22	-1.93148	4.58073704764297e-07
6542000	6544000	AT2G15090	yes	Chr2	6542255	6543947	1.52189	2.10727	6532000	6534000	AT2G15080	Chr2	6533686	6536995	1.3066	1.63762	yes	1300	interaction125543	2-6542000	+	772	2-6532000	+	1287	9432	13	0.069862	-23.565017	1e-06	9	0.069862	900	-13.727755	943	1436	-1.62934	400	400	8	5.50304	2.31383514899471e-117	5.5221	1.07322257118287e-113
12550000	12552000	AT2G29200	NA	Chr2	12548930	12553433	0.550589	0.553432	12540000	12542000	AT2G29170	Chr2	12541863	12542282	1.68722	1.84497	yes	1300	interaction146361	2-12550000	+	1815	2-12540000	+	719	9883	13	0.069862	-23.571442	1e-06	9	0.069862	900	-13.726462	2870	985	-1.62914	400	400	8	-0.965202	1.09116156298038e-06	6.5748	1.02011343265358e-29
3280000	3282000	AT3G10525	yes	Chr3	3281361	3282032	1.51332	2.88041	3260000	3262000	AT3G10470	Chr3	3260350	3261854	1.81442	2.71157	yes	1300	interaction182519	3-3280000	+	775	3-3260000	+	1991	20368	13	0.069862	-23.56468	1e-06	9	0.069862	900	-13.724384	1061	3699	-1.62881	400	400	8	1.31548	8.6629800784315e-06	-3.08412	3.7630381179685e-13
25462000	25464000	AT1G67890	NA	Chr1	25457178	25462792	0.807997	0.730936	25450000	25452000	AT1G67870	Chr1	25449366	25451012	2.04769	2.92002	yes	1300	interaction86142	1-25462000	+	750	1-25450000	+	1055	11638	13	0.069862	-23.567573	1e-06	9	0.069862	900	-13.724258	1066	1970	-1.62879	400	400	8	0.521039	0.00208256711795187	0.708949	0.00969354006026213
24998000	25000000	AT1G66980	yes	Chr1	24997308	25001983	0.80125	1.88024	24982000	24984000	AT1G66950	Chr1	24978204	24984619	1.66084	2.15792	yes	1300	interaction84424	1-24998000	+	1054	1-24982000	+	1818	16053	13	0.069862	-23.541748	1e-06	9	0.069862	900	-13.724009	1076	2412	-1.62875	400	400	8	7.38135	0	-5.02397	7.42142954142439e-14
21470000	21472000	AT5G52930	NA	Chr5	21470298	21471861	0.702527	0.548687	21456000	21458000	AT5G52910	Chr5	21457626	21463159	0.64362	0.608532	NA	1300	interaction393323	5-21470000	+	1545	5-21456000	+	816	13473	13	0.069862	-23.560321	1e-06	9	0.069862	900	-13.72063	2229	1233	-1.62822	400	400	8	5.0374	5.66947904423758e-13	1.27553	0.00042239266383781
3084000	3086000	AT3G10010	NA	Chr3	3081813	3088195	0.737746	0.780171	3068000	3070000	AT3G09980	Chr3	3069230	3071429	0.844132	0.858615	NA	1300	interaction181746	3-3084000	+	1654	3-3068000	+	721	16147	13	0.069862	-23.571182	1e-06	9	0.069862	900	-13.720297	2529	1251	-1.62816	400	400	8	2.37566	7.90959887749525e-66	0.581524	1.42561274107975e-06
5132000	5134000	AT1G14880	yes	Chr1	5132534	5133716	3.05456	3.39932	5116000	5118000	AT1G14850	Chr1	5116695	5123259	0.667254	0.616416	NA	1300	interaction17876	1-5132000	+	618	1-5116000	+	1153	15634	13	0.069862	-23.586761	1e-06	9	0.069862	900	-13.719624	1289	1928	-1.62806	400	400	8	5.94856	3.31213888045262e-06	-0.443447	2.73625812418124e-05
18208000	18210000	AT5G45095	NA	Chr5	18207362	18209045	0.640937	0.717446	18178000	18180000	AT5G45050	Chr5	18176913	18181805	0.635706	0.583898	NA	1300	interaction382378	5-18208000	+	806	5-18178000	+	2168	29618	13	0.069862	-23.561343	1e-06	9	0.069862	900	-13.71673	1483	3248	-1.6276	400	400	8	-2.10859	0.000162032804883707	0.404649	0.0218090200435848
8592000	8594000	AT5G24940	yes	Chr5	8591406	8593601	0.821468	3.93701	8564000	8566000	AT5G24900	Chr5	8563808	8566812	1.5296	1.62594	yes	1300	interaction349647	5-8592000	+	1577	5-8564000	+	890	27643	13	0.069862	-23.553476	1e-06	9	0.069862	900	-13.716237	2195	1522	-1.62752	400	400	8	3.80629	3.60153229417742e-25	-4.01128	9.67485640577028e-12
10680000	10682000	AT4G19610	yes	Chr4	10677228	10681771	0.871343	0.87207	10662000	10664000	AT4G19560	Chr4	10661427	10664716	0.675797	0.674614	NA	1300	interaction292976	4-10680000	+	1568	4-10662000	+	1026	18126	13	0.069862	-23.543483	1e-06	9	0.069862	900	-13.714953	2327	1634	-1.62732	400	400	8	0.396573	0.0474454210290354	1.45137	1.93900750115704e-06
3182000	3184000	AT3G10290	yes	Chr3	3183402	3185348	0.923754	1.00124	3174000	3176000	AT3G10270	Chr3	3173579	3179786	0.769908	0.748069	yes	1300	interaction182146	3-3182000	+	1056	3-3174000	+	1038	8202	13	0.069862	-23.542728	1e-06	9	0.069862	900	-13.714932	1743	1636	-1.62732	400	400	8	2.25476	2.8034985975261e-11	1.65913	5.77512349100378e-14
6468000	6470000	AT1G18750	yes	Chr1	6466760	6469984	0.759232	0.809536	6440000	6442000	AT1G18700	Chr1	6437476	6444076	0.81829	0.797651	NA	1300	interaction22729	1-6468000	+	1162	1-6440000	+	1241	27688	13	0.069862	-23.535839	1e-06	9	0.069862	900	-13.714316	1799	1696	-1.62722	400	400	8	1.77687	1.58049005325987e-21	0.316851	0.00123401318397213
18864000	18866000	AT5G46510	NA	Chr5	18860450	18867013	0.427247	0.432812	18844000	18846000	AT5G46470	Chr5	18842700	18849741	0.82341	0.673445	NA	1300	interaction384643	5-18864000	+	1318	5-18844000	+	1282	19344	13	0.069862	-23.530446	1e-06	9	0.069862	900	-13.713863	1877	1743	-1.62715	400	400	8	0.703522	0.0235165605123907	0.726949	0.00168750164222977
5262000	5264000	AT1G15290	NA	Chr1	5257045	5264942	0.790361	0.644168	5254000	5256000	AT1G15280	Chr1	5252314	5256753	0.798699	0.745188	NA	3500	interaction18343	1-5262000	+	847	1-5254000	+	940	7828	35	0.069862	-93.780634	0	29	0.069862	2900	-72.513897	1312	1616	-1.6271	600	600	34	3.524	1.28436183775593e-38	0.240706	0.00666051823627552
21824000	21826000	AT5G53760	yes	Chr5	21822485	21826451	0.737791	0.740586	21794000	21796000	AT5G53660	Chr5	21794535	21796046	0.648971	0.694388	NA	1100	interaction394480	5-21824000	+	1259	5-21794000	+	2138	29267	11	0.069862	-18.452097	7.4e-05	9	0.082511	762.029243	-13.712426	1911	3442	-1.62692	337.970757	337.971	6	-1.10126	0.00247853433120843	6.02308	1.42447830296929e-09
6752000	6754000	AT3G19480	NA	Chr3	6752530	6754785	0.587326	0.605957	6736000	6738000	AT3G19430	Chr3	6736183	6738330	1.68834	2.17295	yes	1300	interaction194884	3-6752000	+	1319	3-6736000	+	1098	15935	13	0.069862	-23.5392	1e-06	9	0.069862	900	-13.712226	1937	2222	-1.62689	400	400	8	5.61987	2.61618269703431e-173	-5.38586	6.92980493069638e-62
21748000	21750000	AT1G58602	NA	Chr1	21746353	21765705	0.793677	0.883	21742000	21744000	AT1G58590	Chr1	21742943	21743891	0.794187	1.15669	NA	5100	interaction73073	1-21748000	+	1906	1-21742000	+	799	5605	51	0.069862	-154.958634	0	44	0.069862	4400	-127.162083	2201	1057	-1.62683	700	700	58	6.48534	3.72491263006463e-200	1.63245	0.000865226109155758
7610000	7612000	AT5G22794	NA	Chr5	7608241	7611591	0.572109	0.592767	7590000	7592000	AT5G22780	Chr5	7589853	7598049	0.711456	0.626991	NA	1300	interaction346368	5-7610000	+	1384	5-7590000	+	1508	20101	13	0.069862	-23.5266	1e-06	9	0.069862	900	-13.711497	2038	2141	-1.62678	400	400	8	0.457429	0.0238967923198563	-0.220304	0.0392847883573017
22958000	22960000	AT1G62110	NA	Chr1	22957875	22959711	0.637874	0.633166	22920000	22922000	AT1G62020	Chr1	22919533	22924024	0.742386	0.781781	NA	1100	interaction77059	1-22958000	+	1328	1-22920000	+	1812	37712	11	0.069862	-18.450211	7.4e-05	9	0.080623	779.876019	-13.711091	2099	3062	-1.62671	320.123981	320.124	6	-0.558932	0.000403867302004935	-0.518815	1.25755673613423e-10
2772000	2774000	AT5G08560	NA	Chr5	2770873	2774672	0.808131	0.799318	2724000	2726000	AT5G08440	Chr5	2720668	2727167	0.838606	0.72026	NA	1200	interaction329510	5-2772000	+	1354	5-2724000	+	1659	47884	12	0.069862	-20.948717	7e-06	9	0.073537	855.02698	-13.710392	2213	2649	-1.62661	344.97302	344.973	6	-0.408205	4.61247103977029e-07	0.404692	0.0103246946606493
16212000	16214000	AT4G33810	yes	Chr4	16213323	16215594	2.87461	2.56519	16190000	16192000	AT4G33760	Chr4	16189143	16193269	0.788286	0.694475	NA	1300	interaction312504	4-16212000	+	1413	4-16190000	+	1290	21737	13	0.069862	-23.530123	1e-06	9	0.069862	900	-13.710248	2373	2238	-1.62658	400	400	8	-0.424439	0.0077331930417296	1.74587	2.8708199443932e-19
23652000	23654000	AT1G63750	yes	Chr1	23650847	23655363	0.989777	0.962033	23626000	23628000	AT1G63700	Chr1	23624665	23629112	0.84574	0.707138	yes	950.185733	interaction79447	1-23652000	+	2116	1-23626000	+	1685	26057	10	0.073525	-16.031557	0.000763	9	0.091731	685.439575	-13.709297	3023	2419	-1.62643	264.746159	264.746	6	2.68573	2.21561601326895e-34	0.430874	0.000901994317630334
1142000	1144000	AT5G04160	NA	Chr5	1142781	1144912	0.746915	0.651795	1134000	1136000	AT5G04140	Chr5	1129851	1138442	0.747643	0.588822	NA	3500	interaction323807	5-1142000	+	973	5-1134000	+	2067	8444	35	0.069862	-93.692419	0	29	0.069862	2900	-72.480842	1479	2591	-1.62571	600	600	34	0.373312	0.0113282440576609	7.40463	1.23797485802098e-227
12640000	12642000	AT4G24450	NA	Chr4	12635425	12642797	0.579102	0.622714	12614000	12616000	AT4G24390	Chr4	12613075	12616117	0.684037	0.764364	NA	1051.950674	interaction299798	4-12640000	+	2276	4-12614000	+	1698	26373	12	0.079694	-20.940376	7e-06	13	0.115305	787.655457	-23.505201	3696	2487	-1.6247	264.295218	264.295	6	2.42363	3.29259130209588e-26	0.58108	1.97883992617524e-06
16648000	16650000	AT2G39880	yes	Chr2	16647944	16649479	0.765234	0.839068	16644000	16646000	AT2G39870	Chr2	16643380	16645377	0.712914	0.900185	NA	2300	interaction160923	2-16648000	+	535	2-16644000	+	555	3166	23	0.069862	-53.003552	0	18	0.069862	1800	-37.49827	954	877	-1.61576	500	500	18	1.19157	0.000128843435463368	0.894583	4.5515546238722e-07
12598000	12600000	AT2G29340	NA	Chr2	12597114	12599203	0.741812	0.856324	12592000	12594000	AT2G29320	Chr2	12592147	12593686	1.11773	1.85477	yes	2300	interaction146525	2-12598000	+	661	2-12592000	+	965	6615	23	0.069862	-52.918744	0	18	0.069862	1800	-37.496314	888	1227	-1.61563	500	500	18	1.29904	5.04883795481463e-25	0.990224	0.000675468637501596
12526000	12528000	AT2G29130	yes	Chr2	12524888	12527747	2.15986	1.68836	12512000	12514000	AT2G29120	Chr2	12511291	12515895	2.6238	2.30407	yes	2300	interaction146241	2-12526000	+	527	2-12512000	+	1753	13588	23	0.069862	-53.010328	0	18	0.069862	1800	-37.485229	956	2367	-1.61486	500	500	18	-3.53502	1.71514593703684e-11	3.11009	8.84571001744571e-10
16202000	16204000	AT4G33780	yes	Chr4	16201830	16203641	1.05189	0.798313	16196000	16198000	AT4G33770	Chr4	16193421	16196428	0.706284	0.694021	yes	2300	interaction312476	4-16202000	+	1016	4-16196000	+	592	5540	23	0.069862	-52.960651	0	18	0.069862	1800	-37.46033	1734	1155	-1.61315	500	500	18	-0.957685	2.59012499920394e-20	-0.867048	0.00478647509271968
23714000	23716000	AT1G63880	yes	Chr1	23712275	23716124	1.00299	2.41442	23704000	23706000	AT1G63860	Chr1	23701483	23706005	0.75677	0.684664	NA	2300	interaction79638	1-23714000	+	1156	1-23704000	+	1200	9701	23	0.069862	-52.765837	0	18	0.069862	1800	-37.428298	1579	1597	-1.61095	500	500	18	4.06168	6.1094318667036e-97	4.28153	3.1403002378907e-41
24518000	24520000	AT1G65900	yes	Chr1	24515836	24518487	0.806878	0.869918	24504000	24506000	AT1G65870	Chr1	24503623	24504193	2.16757	3.94758	yes	2300	interaction82850	1-24518000	+	1186	1-24504000	+	1433	14380	23	0.069862	-52.760701	0	18	0.069862	1800	-37.425728	1627	2351	-1.61078	500	500	18	1.19134	8.44702868720057e-08	6.26526	3.32049806423222e-14
21698000	21700000	AT3G58650	NA	Chr3	21696245	21699998	0.619075	0.657803	21680000	21682000	AT3G58620	Chr3	21680325	21683135	0.830585	0.676196	NA	2300	interaction249243	3-21698000	+	1616	3-21680000	+	1381	17854	23	0.069862	-52.732788	0	18	0.069862	1800	-37.412317	2429	1934	-1.60986	500	500	18	0.910126	0.000817235290033942	0.533627	6.54394140968765e-05
12730000	12732000	AT4G24670	yes	Chr4	12727833	12731274	0.843144	1.47999	12724000	12726000	AT4G24660	Chr4	12724742	12725637	1.49936	5.93431	yes	3600	interaction300248	4-12730000	+	989	4-12724000	+	1216	6118	36	0.069862	-97.302154	0	30	0.069862	3000	-75.917802	1401	1459	-1.60747	600	600	36	1.53356	8.07522450297386e-16	4.22583	9.38124723983767e-61
25908000	25910000	AT1G68910	NA	Chr1	25908130	25911108	0.803415	0.760564	25902000	25904000	AT1G68890	Chr1	25896944	25906714	0.804871	0.604389	NA	3700	interaction87531	1-25908000	+	1351	1-25902000	+	421	5374	37	0.069862	-101.84923	0	31	0.069862	3100	-79.79972	2237	600	-1.60576	600	600	38	0.425413	1.05418825888771e-05	3.79627	8.78283016139402e-36
24374000	24376000	AT1G65570	yes	Chr1	24374097	24375846	3.56632	3.84487	24320000	24322000	AT1G65470	Chr1	24319669	24324064	0.775682	0.815108	yes	900	interaction82186	1-24374000	+	1566	1-24320000	+	1642	53461	9	0.069862	-13.715711	0.007132	8	0.087074	641.860417	-11.49678	2748	2526	-1.60539	258.139583	258.14	4	-5.7582	5.63977158133075e-18	0.404219	0.0491181612603162
1524000	1526000	AT3G05340	NA	Chr3	1523462	1526166	0.631456	0.61101	1520000	1522000	AT3G05330	Chr3	1518881	1521494	0.582754	0.590244	NA	7200	interaction176190	3-1524000	+	887	3-1520000	+	1344	3982	72	0.069862	-242.847388	0	64	0.069862	6400	-207.58486	1386	2030	-1.60455	800	800	90	1.07699	1.97133437579868e-07	1.00152	1.05512620305517e-05
12182000	12184000	AT4G23300	NA	Chr4	12181931	12184704	0.685613	0.572396	12178000	12180000	AT4G23290	Chr4	12177737	12180826	0.799114	0.915533	yes	9500	interaction297995	4-12182000	+	1244	4-12178000	+	2061	3462	95	0.069862	-345.41312	0	86	0.069862	8600	-303.554423	1552	2603	-1.60346	900	900	128	8.62841	8.92301190476683e-122	8.61027	8.83990746647732e-156
27924000	27926000	AT1G74260	NA	Chr1	27922832	27927904	0.696751	0.606576	27894000	27896000	AT1G74170	Chr1	27891493	27896355	0.755146	0.667158	NA	901.819218	interaction94182	1-27924000	+	2644	1-27894000	+	1705	30673	12	0.092961	-20.940242	7e-06	14	0.143905	679.66472	-26.151281	4196	2734	-1.59448	222.154497	222.154	6	0.306897	0.000399808642394865	0.825682	0.000218813149538922
20830000	20832000	AT3G56140	NA	Chr3	20829281	20832871	0.757837	0.723823	20820000	20822000	AT3G56110	Chr3	20820252	20823030	0.783229	0.794678	NA	3500	interaction245899	3-20830000	+	2195	3-20820000	+	1167	9865	35	0.069862	-93.594237	0	31	0.073859	2932.25346	-79.307489	3319	1774	-1.58717	567.74654	567.747	34	2.01248	9.89384426765794e-131	-0.451434	0.000275726664026093
6424000	6426000	AT3G18670	yes	Chr3	6424134	6426471	1.23261	1.63243	6420000	6422000	AT3G18660	Chr3	6419030	6422002	1.0079	1.09214	yes	15052.245552	interaction193641	3-6424000	+	2157	3-6420000	+	1753	3887	168	0.077974	-705.476498	0	275	0.136006	14125.855504	-1287.944996	3815	2842	-1.58603	926.390048	926.39	264	-0.682006	0.0481378868812429	-1.19	0.0295611232925971
8190000	8192000	AT2G18900	NA	Chr2	8188256	8192489	0.779969	0.673339	8184000	8186000	AT2G18890	Chr2	8183889	8186796	0.834	0.885694	yes	1400	interaction131411	2-8190000	+	873	2-8184000	+	281	5488	14	0.069862	-26.406869	0	10	0.069862	1000	-16.092585	1333	444	-1.57856	400	400	8	-0.427154	0.00900267231076403	1.30697	5.37311075244516e-06
10760000	10762000	AT1G30440	NA	Chr1	10759474	10762394	0.708224	0.716385	10754000	10756000	AT1G30420	Chr1	10748815	10756316	0.555092	0.574199	NA	6500	interaction37738	1-10760000	+	1072	1-10754000	+	2761	6032	65	0.069862	-212.248473	0	80	0.095601	5846.125908	-276.384473	1815	4199	-1.577	653.874092	653.874	78	0.290686	0.0260095289039154	-2.00563	2.07427282472961e-14
12072000	12074000	AT4G23030	NA	Chr4	12072856	12074365	0.673028	0.674638	12068000	12070000	AT4G23020	Chr4	12066172	12068538	1.72776	3.34683	yes	3800	interaction297504	4-12072000	+	1052	4-12068000	+	685	4671	38	0.069862	-104.934413	0	32	0.069862	3200	-82.954723	1567	1100	-1.57599	600	600	38	2.60819	1.20671150715044e-11	3.10624	1.88848320726969e-34
9794000	9796000	AT2G23000	yes	Chr2	9792211	9795863	1.13174	1.89497	9786000	9788000	AT2G22990	Chr2	9786315	9790179	1.00135	1.80243	yes	1400	interaction137064	2-9794000	+	870	2-9786000	+	466	8326	14	0.069862	-26.29272	0	10	0.069862	1000	-16.068214	1262	628	-1.57544	400	400	8	3.85127	3.6437889814708e-25	4.3584	9.62373442943335e-23
28756000	28758000	AT1G76620	NA	Chr1	28756520	28759297	0.749332	0.787136	28750000	28752000	AT1G76610	Chr1	28750987	28751851	3.38376	4.70186	yes	1400	interaction96908	1-28756000	+	584	1-28750000	+	369	6292	14	0.069862	-26.338093	0	10	0.069862	1000	-16.062639	799	694	-1.57473	400	400	8	3.33882	1.06044789403333e-17	4.21927	1.40202965713421e-17
2356000	2358000	AT3G07360	NA	Chr3	2354718	2356854	0.649286	0.766941	2348000	2350000	AT3G07350	Chr3	2347467	2348791	1.46595	1.00748	NA	1400	interaction179036	3-2356000	+	418	3-2348000	+	628	7578	14	0.069862	-26.312507	0	10	0.069862	1000	-16.059682	735	1131	-1.57436	400	400	8	0.838156	6.21709237879104e-17	2.21583	9.83663853029963e-61
5118000	5120000	AT1G14850	NA	Chr1	5116695	5123259	0.667254	0.616416	5096000	5098000	AT1G14790	Chr1	5093960	5098032	0.770032	0.753707	yes	1100	interaction17833	1-5118000	+	1531	1-5096000	+	1898	21811	11	0.069862	-18.445652	7.4e-05	12	0.102071	821.332079	-20.928981	2603	3126	-1.57413	278.667921	278.668	6	-0.443447	2.73625812418124e-05	-0.658531	0.0238154728206834
7338000	7340000	AT5G22130	NA	Chr5	7337157	7340052	0.686035	0.671954	7328000	7330000	AT5G22100	Chr5	7328960	7330930	0.78774	0.71277	yes	1400	interaction345396	5-7338000	+	1080	5-7328000	+	512	9138	14	0.069862	-26.277274	0	10	0.069862	1000	-16.054773	1821	815	-1.57374	400	400	8	-0.658388	2.16416046807839e-07	-0.391521	0.00379039016930247
4882000	4884000	AT1G14300	NA	Chr1	4882375	4884791	0.735952	0.7602	4878000	4880000	AT1G14280	Chr1	4877626	4879149	0.746647	0.673055	NA	5500	interaction17117	1-4882000	+	810	1-4878000	+	1089	3805	55	0.069862	-171.119213	0	48	0.069862	4800	-142.42667	1435	1415	-1.57367	700	700	64	-0.389645	0.0251401269824865	5.45426	1.5121104253871e-153
12454000	12456000	AT2G28990	yes	Chr2	12455054	12459541	3.0457	3.7813	12432000	12434000	AT2G28950	Chr2	12431340	12433595	0.565797	0.851628	NA	1400	interaction145759	2-12454000	+	2091	2-12432000	+	572	21980	14	0.069862	-26.260895	0	10	0.069862	1000	-16.050248	3434	906	-1.57316	400	400	8	-5.99013	2.00176333203294e-41	3.42492	2.77060406899097e-61
7902000	7904000	AT4G13590	yes	Chr4	7901215	7904025	0.918413	1.00384	7874000	7876000	AT4G13550	Chr4	7871056	7876963	0.778294	0.695654	NA	1400	interaction283340	4-7902000	+	1663	4-7874000	+	764	27719	14	0.069862	-26.225889	0	10	0.069862	1000	-16.045408	2506	1029	-1.57255	400	400	8	1.48219	3.37459181401426e-19	1.99135	8.05319993806548e-47
310000	312000	AT4G00740	yes	Chr4	307430	310482	0.677312	0.805734	298000	300000	AT4G00730	Chr4	299358	304508	2.41348	4.25366	yes	1400	interaction256220	4-310000	+	778	4-298000	+	908	11410	14	0.069862	-26.224017	0	10	0.069862	1000	-16.039735	1224	1257	-1.57183	400	400	8	-0.564155	5.22304468889301e-05	2.00677	1.17676749556107e-07
13772000	13774000	AT2G32430	NA	Chr2	13771295	13774502	0.711258	0.746276	13764000	13766000	AT2G32415	Chr2	13761136	13765456	0.773394	0.711033	yes	1400	interaction150680	2-13772000	+	774	2-13764000	+	812	7714	14	0.069862	-26.224545	0	10	0.069862	1000	-16.038227	1347	1289	-1.57164	400	400	8	-1.78818	8.32511901481043e-18	0.50925	0.00502087119836854
24516000	24518000	AT1G65900	yes	Chr1	24515836	24518487	0.806878	0.869918	24500000	24502000	AT1G65860	Chr1	24499065	24502745	3.02125	3.30173	yes	1400	interaction82834	1-24516000	+	1753	1-24500000	+	899	16593	14	0.069862	-26.21028	0	10	0.069862	1000	-16.035717	2117	1414	-1.57133	400	400	8	1.19134	8.44702868720057e-08	4.40194	6.14080108865976e-123
392000	394000	AT3G02150	yes	Chr3	391056	392758	3.27703	5.41656	380000	382000	AT3G02130	Chr3	380725	384405	0.676096	0.722266	NA	1400	interaction172462	3-392000	+	1080	3-380000	+	863	11748	14	0.069862	-26.213962	0	10	0.069862	1000	-16.035571	1686	1422	-1.57131	400	400	8	5.14972	2.05157097936967e-73	0.762453	0.000221726077496109
17382000	17384000	AT5G43310	NA	Chr5	17379485	17385535	0.860915	0.826556	17360000	17362000	AT5G43270	Chr5	17360286	17363773	0.739552	0.706486	NA	1400	interaction379765	5-17382000	+	845	5-17360000	+	1072	21358	14	0.069862	-26.215921	0	10	0.069862	1000	-16.03458	1479	1588	-1.57118	400	400	8	0.770696	0.000300566112449552	1.3807	6.03500575113573e-23
21196000	21198000	AT1G56570	NA	Chr1	21195803	21197721	0.774492	0.701377	21170000	21172000	AT1G56510	Chr1	21167588	21173632	1.01342	1.77375	yes	1400	interaction71278	1-21196000	+	2015	1-21170000	+	1623	26132	14	0.069862	-26.171016	0	10	0.069862	1000	-16.033865	3027	1523	-1.57109	400	400	8	0.679804	0.00137890463678545	7.00144	6.28193826751109e-75
4972000	4974000	AT3G14810	yes	Chr3	4970989	4974534	0.836386	1.0475	4954000	4956000	AT3G14750	Chr3	4953575	4955656	0.797938	0.687457	NA	1400	interaction188673	3-4972000	+	1472	3-4954000	+	1022	17673	14	0.069862	-26.199667	0	10	0.069862	1000	-16.032112	2153	1643	-1.57087	400	400	8	1.69819	3.02762312348935e-08	0.644938	0.000346327255141733
12798000	12800000	AT4G24840	NA	Chr4	12796246	12800949	0.879729	0.732896	12782000	12784000	AT4G24800	Chr4	12781761	12785197	0.742248	0.752714	NA	1400	interaction300482	4-12798000	+	1209	4-12782000	+	1044	16015	14	0.069862	-26.198034	0	10	0.069862	1000	-16.031897	2038	1659	-1.57084	400	400	8	-0.43712	0.00109213379115273	1.0489	2.59970936206385e-11
18736000	18738000	AT2G45460	NA	Chr2	18736827	18741841	0.681778	0.651998	18720000	18722000	AT2G45420	Chr2	18718347	18720729	4.46378	4.61343	yes	1400	interaction168035	2-18736000	+	947	2-18720000	+	718	16857	14	0.069862	-26.232558	0	10	0.069862	1000	-16.031544	1707	1686	-1.5708	400	400	8	0.440571	0.000466929547027478	-2.78096	7.20867446078499e-08
8642000	8644000	AT1G24360	NA	Chr1	8640581	8643478	0.801229	0.720594	8628000	8630000	AT1G24320	Chr1	8626314	8630971	0.562146	0.570829	NA	1400	interaction30386	1-8642000	+	1191	1-8628000	+	1319	14325	14	0.069862	-26.188675	0	10	0.069862	1000	-16.031177	1715	1832	-1.57075	400	400	8	0.375082	8.78317528420911e-05	-5.80042	1.71926741900009e-34
12760000	12762000	AT2G29940	yes	Chr2	12760138	12766623	1.10414	1.20105	12744000	12746000	AT2G29890	Chr2	12744149	12749596	0.653788	0.661485	NA	1400	interaction147313	2-12760000	+	1336	2-12744000	+	1291	15777	14	0.069862	-26.183532	0	10	0.069862	1000	-16.028735	2333	1937	-1.57045	400	400	8	5.6035	1.67481282677257e-69	0.527832	0.0289226347822074
20376000	20378000	AT5G50110	NA	Chr5	20373514	20376207	0.861364	0.835847	20352000	20354000	AT5G50020	Chr5	20351159	20354436	0.856202	0.826671	yes	1400	interaction389810	5-20376000	+	1192	5-20352000	+	1625	23550	14	0.069862	-26.18862	0	10	0.069862	1000	-16.027748	2044	2560	-1.57032	400	400	8	1.58874	1.16603888469373e-26	0.510759	2.60830508523571e-05
2076000	2078000	AT3G06640	NA	Chr3	2074188	2078317	0.53491	0.516312	2072000	2074000	AT3G06630	Chr3	2070387	2073800	0.48862	0.603189	NA	11035.223438	interaction178055	3-2076000	+	2822	3-2072000	+	2426	4170	223	0.141177	-997.856692	0	339	0.226493	10456.492963	-1654.789019	4300	4199	-1.56422	578.730475	578.73	374	2.2149	2.99425924385214e-09	-2.36349	1.083283460225e-13
9006000	9008000	AT2G20960	NA	Chr2	9006647	9009763	0.628797	0.558398	9004000	9006000	AT2G20950	Chr2	9003134	9005938	0.602766	0.74245	NA	5600	interaction134252	2-9006000	+	1740	2-9004000	+	757	2663	56	0.069862	-175.349006	0	49	0.069862	4900	-146.38141	2726	1367	-1.56356	700	700	64	1.04561	5.71984865613348e-11	0.477487	0.00239962224020593
16930000	16932000	AT3G46100	NA	Chr3	16928293	16931033	0.796651	0.796386	16926000	16928000	AT3G46090	Chr3	16926215	16926850	4.68397	4.71932	yes	3900	interaction232232	3-16930000	+	558	3-16926000	+	1093	3797	39	0.069862	-108.898745	0	33	0.069862	3300	-86.561102	937	1510	-1.56267	600	600	40	2.06369	2.79908820529886e-26	4.10216	5.93001934883926e-13
19358000	19360000	AT5G47810	NA	Chr5	19356355	19358125	0.510324	0.759659	19348000	19350000	AT5G47780	Chr5	19347918	19350669	0.824542	0.724876	NA	2291.517507	interaction386095	5-19358000	+	2170	5-19348000	+	1567	10011	23	0.070121	-52.712671	0	26	0.095637	1899.271452	-62.349896	3182	2396	-1.55715	392.246055	392.246	18	-0.425624	0.00191779679310066	0.732234	1.88081927343069e-05
6160000	6162000	AT3G18010	yes	Chr3	6161136	6163272	3.73805	5.32606	6150000	6152000	AT3G17970	Chr3	6147961	6152018	0.878222	0.866188	NA	2500	interaction192611	3-6160000	+	1026	3-6150000	+	1260	9840	25	0.069862	-59.236241	0	20	0.069862	2000	-43.404705	1463	1951	-1.55532	500	500	22	7.29581	2.27089192242883e-20	0.841072	8.94531187525329e-24
396000	398000	AT3G02170	NA	Chr3	396011	399779	0.667896	0.564211	382000	384000	AT3G02130	Chr3	380725	384405	0.676096	0.722266	NA	2500	interaction172476	3-396000	+	1279	3-382000	+	1652	14164	25	0.069862	-59.182101	0	20	0.069862	2000	-43.388698	1692	2454	-1.55442	500	500	22	1.94949	9.45743249890586e-12	0.762453	0.000221726077496109
5040000	5042000	AT3G14980	NA	Chr3	5039930	5045403	0.739128	0.647169	5028000	5030000	AT3G14940	Chr3	5025237	5029710	0.522426	0.589573	NA	3531.21662	interaction188902	3-5040000	+	2132	3-5028000	+	1755	12199	39	0.077158	-108.010414	0	46	0.10461	3072.02208	-134.280068	2922	2854	-1.55386	459.19454	459.195	40	0.920684	4.57469256770054e-06	-4.67094	8.5543656372517e-54
1156000	1158000	AT5G04220	NA	Chr5	1155864	1158877	0.826017	0.828186	1136000	1138000	AT5G04140	Chr5	1129851	1138442	0.747643	0.588822	NA	1537.597114	interaction323872	5-1156000	+	2687	5-1136000	+	1722	19859	21	0.095415	-46.444799	0	20	0.113703	1228.850068	-43.360306	3867	2344	-1.55284	308.747046	308.747	16	1.24991	7.51143612184431e-06	7.40463	1.23797485802098e-227
2096000	2098000	AT3G66658	NA	Chr3	2095104	2099151	0.768999	0.721608	2076000	2078000	AT3G06640	Chr3	2074188	2078317	0.53491	0.516312	NA	1500	interaction178154	3-2096000	+	1082	3-2076000	+	2822	19449	15	0.069862	-28.919922	0	17	0.10049	1181.866145	-34.512957	1863	4300	-1.55083	318.133855	318.134	10	-0.586835	4.12297179493997e-10	2.2149	2.99425924385214e-09
21624000	21626000	AT3G58460	NA	Chr3	21623178	21626701	0.770272	0.742001	21614000	21616000	AT3G58430	Chr3	21613162	21616183	0.801473	0.912698	NA	3500	interaction248927	3-21624000	+	1957	3-21614000	+	1410	10122	35	0.069862	-93.509709	0	34	0.079748	2978.531372	-89.804581	3023	2103	-1.53742	521.468628	521.469	34	-0.297255	0.00713652834295479	1.70558	6.44156960515832e-13
2094000	2096000	AT5G06780	NA	Chr5	2093882	2097129	0.857751	0.763421	2084000	2086000	AT5G06740	Chr5	2084093	2086052	0.989645	0.78647	yes	3100	interaction327164	5-2094000	+	1390	5-2084000	+	2045	9718	31	0.069862	-79.376258	0	48	0.126372	2653.570158	-142.127136	2299	4382	-1.53537	446.429842	446.43	28	0.325538	0.00155781019935171	-5.21082	1.40661301384844e-28
920000	922000	AT5G03620	NA	Chr5	918737	921874	0.648652	0.663564	898000	900000	AT5G03555	Chr5	898240	900159	0.615096	0.601236	NA	1400	interaction323054	5-920000	+	1326	5-898000	+	1743	21582	14	0.069862	-26.181916	0	16	0.101997	1095.911206	-31.655579	2395	3395	-1.53453	304.088794	304.089	8	3.15474	5.63927144827522e-14	0.360242	0.0307555639470539
15782000	15784000	AT2G37630	NA	Chr2	15781614	15783433	0.665461	0.733215	15774000	15776000	AT2G37600	Chr2	15774244	15775374	0.860413	0.854988	yes	1500	interaction157938	2-15782000	+	1205	2-15774000	+	375	7147	15	0.069862	-29.082436	0	11	0.069862	1100	-18.500646	1865	540	-1.52882	400	400	10	1.87381	1.46213665978394e-80	0.240594	0.0194517458899907
13022000	13024000	AT4G25490	yes	Chr4	13021779	13022725	0.804672	0.84876	13016000	13018000	AT4G25470	Chr4	13015276	13016220	0.67407	0.882443	yes	1500	interaction301225	4-13022000	+	328	4-13016000	+	507	6514	15	0.069862	-29.118502	0	11	0.069862	1100	-18.494487	582	724	-1.52817	400	400	10	4.38601	3.69754105474462e-09	4.27794	4.85560645253009e-11
13222000	13224000	AT2G31070	yes	Chr2	13220477	13222609	1.37473	4.19213	13218000	13220000	AT2G31060	Chr2	13213099	13218724	0.873146	0.818928	NA	4100	interaction148815	2-13222000	+	1291	2-13218000	+	905	4655	41	0.069862	-115.886334	0	35	0.069862	3500	-93.542671	1664	1304	-1.5278	600	600	42	3.71341	2.38652782812119e-60	-0.518765	0.0323772801498846
13676000	13678000	AT4G27310	NA	Chr4	13675637	13676910	0.603283	0.848634	13670000	13672000	AT4G27300	Chr4	13669307	13672348	0.924247	0.951683	yes	4100	interaction303802	4-13676000	+	910	4-13670000	+	1798	5844	41	0.069862	-115.881443	0	35	0.069862	3500	-93.532484	1335	2431	-1.5275	600	600	42	3.95534	3.91480909912275e-133	5.23805	1.80243843901158e-201
19140000	19142000	AT2G46620	NA	Chr2	19138800	19140747	0.625087	0.858515	19134000	19136000	AT2G46590	Chr2	19133039	19135289	3.00149	1.44049	yes	1500	interaction169244	2-19140000	+	305	2-19134000	+	859	5492	15	0.069862	-29.140277	0	11	0.069862	1100	-18.486543	647	1493	-1.52733	400	400	10	-1.57184	5.72886505783676e-05	-0.554354	0.000323971824606547
5116000	5118000	AT1G14850	NA	Chr1	5116695	5123259	0.667254	0.616416	5114000	5116000	AT1G14840	Chr1	5111954	5115497	0.742387	0.623442	NA	6000	interaction17831	1-5116000	+	1153	1-5114000	+	765	2575	60	0.069862	-191.911264	0	53	0.069862	5300	-162.446465	1928	1188	-1.52695	700	700	70	-0.443447	2.73625812418124e-05	3.16594	1.73940874458536e-29
6888000	6890000	AT3G19830	NA	Chr3	6885605	6890064	0.811467	0.712975	6882000	6884000	AT3G19820	Chr3	6879616	6882315	0.75876	0.72121	NA	1500	interaction195381	3-6888000	+	801	3-6882000	+	448	6077	15	0.069862	-29.041612	0	11	0.069862	1100	-18.480148	1204	711	-1.52666	400	400	10	1.06121	6.24530461089223e-12	0.374445	0.000346964420273692
17160000	17162000	AT3G46610	NA	Chr3	17160004	17162475	0.694342	0.641929	17152000	17154000	AT3G46590	Chr3	17152774	17156227	0.756746	0.674169	NA	1500	interaction233222	3-17160000	+	968	3-17152000	+	482	7264	15	0.069862	-29.026868	0	11	0.069862	1100	-18.470105	1429	842	-1.52562	400	400	10	2.08264	9.32452527009676e-41	0.942069	2.34879034267088e-07
18502000	18504000	AT5G45620	NA	Chr5	18501485	18504117	0.808904	0.808916	18458000	18460000	AT5G45540	Chr5	18458153	18460821	0.742726	0.880661	yes	900	interaction383398	5-18502000	+	1507	5-18458000	+	1913	43242	9	0.069862	-13.716423	0.007132	9	0.095848	655.993916	-13.709153	2449	3120	-1.52553	244.006084	244.006	4	-0.239955	0.00925195014343829	2.27524	5.26999271272829e-08
7210000	7212000	AT5G21222	NA	Chr5	7208642	7213894	0.786167	0.630853	7206000	7208000	AT5G21170	Chr5	7205561	7208496	0.800851	0.871136	NA	6000	interaction345080	5-7210000	+	1182	5-7206000	+	801	3911	60	0.069862	-191.805128	0	53	0.069862	5300	-162.353862	1828	1292	-1.52512	700	700	70	3.79446	6.5736554884482e-225	0.973285	6.63600266263914e-05
15890000	15892000	AT3G44160	NA	Chr3	15888901	15891988	0.746422	0.680864	15878000	15880000	AT3G44120	Chr3	15878398	15879817	0.822216	1.20785	yes	1500	interaction228404	3-15890000	+	963	3-15878000	+	607	12024	15	0.069862	-28.986992	0	11	0.069862	1100	-18.465007	1518	929	-1.52509	400	400	10	1.00575	6.00992433854231e-23	-3.13195	5.25814986110201e-07
25538000	25540000	AT5G63810	NA	Chr5	25537073	25541529	0.696572	0.62811	25532000	25534000	AT5G63800	Chr5	25530054	25535849	0.780542	0.968918	NA	1500	interaction406604	5-25538000	+	501	5-25532000	+	1197	5804	15	0.069862	-29.01951	0	11	0.069862	1100	-18.463867	951	1716	-1.52497	400	400	10	1.19253	1.73869103715638e-07	1.53535	9.80135846503842e-28
12552000	12554000	AT2G29200	NA	Chr2	12548930	12553433	0.550589	0.553432	12540000	12542000	AT2G29170	Chr2	12541863	12542282	1.68722	1.84497	yes	1500	interaction146371	2-12552000	+	1156	2-12540000	+	719	11415	15	0.069862	-28.963132	0	11	0.069862	1100	-18.462205	1925	985	-1.52479	400	400	10	-0.965202	1.09116156298038e-06	6.5748	1.02011343265358e-29
3586000	3588000	AT1G10760	NA	Chr1	3581033	3590928	0.822125	0.619193	3578000	3580000	AT1G10750	Chr1	3574806	3578474	0.89318	0.813529	yes	1500	interaction12763	1-3586000	+	652	1-3578000	+	719	8593	15	0.069862	-28.976412	0	11	0.069862	1100	-18.46128	1005	1209	-1.5247	400	400	10	1.75451	2.63900408842521e-21	-1.01297	1.07733954297208e-08
24936000	24938000	AT5G62090	NA	Chr5	24934962	24939109	0.75217	0.711982	24924000	24926000	AT5G62050	Chr5	24923773	24927314	0.843798	0.759724	yes	1500	interaction404797	5-24936000	+	719	5-24924000	+	1497	12136	15	0.069862	-28.963132	0	11	0.069862	1100	-18.457047	1108	2264	-1.52426	400	400	10	0.884246	4.22197164148177e-12	-0.582028	1.49482316808008e-06
10976000	10978000	AT2G25737	NA	Chr2	10976935	10979900	0.735249	0.754132	10968000	10970000	AT2G25730	Chr2	10956300	10972927	0.811425	0.720457	NA	1500	interaction140986	2-10976000	+	732	2-10968000	+	960	8711	15	0.069862	-28.960839	0	11	0.069862	1100	-18.449853	1342	1435	-1.52351	400	400	10	0.554989	0.000616636498988423	-0.499285	3.9767340778697e-05
6408000	6410000	AT5G19100	yes	Chr5	6408241	6409417	1.58343	1.32423	6388000	6390000	AT5G19090	Chr5	6387488	6390024	0.562241	0.563111	NA	1500	interaction342154	5-6408000	+	1270	5-6388000	+	909	19913	15	0.069862	-28.936184	0	11	0.069862	1100	-18.449802	2559	1344	-1.52351	400	400	10	-3.16721	4.1530780272216e-26	0.84517	3.2232227181392e-12
[truncated: 868 more rows]
