# Supplementary material for: Polycomb-dependent differential chromatin compartmentalization determines gene coregulation in Arabidopsis
Source: HighWire-hosted journal article supplement (doi:10.1101/gr.273771.120), 2021-06-03
Supplement: Supplemental_Table_S10.xlsx [file Supplemental_Table_S10.xlsx]

## Sheet: S10
Supplementary Table S10: HiChIP_Root_Fig2D
hyper root", "root specific loop" and "K27me3 marked"							hypo root, "root specific loop" and "K27me3 marked"
Gene	#'chr'	'start'	'end'	Shoot	Root		Gene	#'chr'	'start'	'end'	Shoot	Root
AT1G01250	Chr1	104490	105330	3.95458	5.53075		AT1G01670	Chr1	242842	245988	1.61456	1.11835
AT1G02580	Chr1	544782	549202	3.60345	3.86195		AT1G06270	Chr1	1918087	1919760	0.792694	0.768168
AT1G02670	Chr1	576045	580299	0.684223	0.743673		AT1G07175	Chr1	2202329	2202774	4.09615	3.55799
AT1G05805	Chr1	1744772	1747693	0.717017	0.944553		AT1G08300	Chr1	2614773	2618823	0.86561	0.75375
AT1G06360	Chr1	1938962	1940459	3.6177	4.8798		AT1G08430	Chr1	2658715	2661029	3.03297	2.34279
AT1G06820	Chr1	2092945	2096232	0.940912	0.957184		AT1G09530	Chr1	3076581	3079539	0.998111	0.794292
AT1G07430	Chr1	2280834	2282828	3.25452	3.58823		AT1G09930	Chr1	3227489	3230043	2.08826	1.66754
AT1G07720	Chr1	2390654	2392453	1.99334	3.09367		AT1G10750	Chr1	3574806	3578474	0.89318	0.813529
AT1G08465	Chr1	2675812	2679781	3.52557	4.74359		AT1G11080	Chr1	3694671	3698013	2.96174	2.24063
AT1G09240	Chr1	2984880	2986130	2.75664	3.13457		AT1G12600	Chr1	4286203	4288878	1.9941	1.84483
AT1G11600	Chr1	3902011	3903782	3.22801	3.51771		AT1G14030	Chr1	4805305	4807517	0.711527	0.608517
AT1G12040	Chr1	4070123	4072567	0.679292	0.705253		AT1G14040	Chr1	4810487	4814543	1.26223	0.843957
AT1G12090	Chr1	4089846	4090725	2.57551	3.71658		AT1G14790	Chr1	5093960	5098032	0.770032	0.753707
AT1G12100	Chr1	4095245	4095845	2.97429	5.4234		AT1G21140	Chr1	7404382	7405281	4.10112	3.64629
AT1G12110	Chr1	4105232	4109545	2.09304	3.24679		AT1G22065	Chr1	7785775	7786391	1.41785	1.05936
AT1G12260	Chr1	4162831	4165852	3.80067	4.54031		AT1G22360	Chr1	7894857	7897591	1.80588	1.24629
AT1G12570	Chr1	4277992	4280862	3.02393	3.26619		AT1G22470	Chr1	7932853	7933390	2.16616	1.15536
AT1G13635	Chr1	4674151	4676170	1.1555	1.73252		AT1G26200	Chr1	9063470	9064914	1.60596	1.32922
AT1G13650	Chr1	4680431	4682196	1.11816	1.7164		AT1G26970	Chr1	9359681	9361833	1.4538	1.26541
AT1G14250	Chr1	4868451	4871488	1.32091	2.09904		AT1G28960	Chr1	10109499	10111660	0.857594	0.85135
AT1G14430	Chr1	4934119	4936100	0.550087	0.999012		AT1G30320	Chr1	10680245	10682954	0.80321	0.714908
AT1G14590	Chr1	4998815	5000643	0.861994	0.89304		AT1G32170	Chr1	11575319	11577927	2.23136	1.24359
AT1G14880	Chr1	5132534	5133716	3.05456	3.39932		AT1G33750	Chr1	12233768	12236476	4.06441	3.94207
AT1G15630	Chr1	5376792	5378027	2.12358	2.52365		AT1G33811	Chr1	12267865	12269913	2.37505	2.25246
AT1G16410	Chr1	5608806	5611426	3.00237	3.53296		AT1G42560	Chr1	15980134	15983328	1.46776	1.04693
AT1G20380	Chr1	7061664	7065178	0.849566	0.99411		AT1G44750	Chr1	16892638	16895465	0.801747	0.793843
AT1G21130	Chr1	7399061	7400605	0.917371	1.21184		AT1G49475	Chr1	18312919	18314016	1.41619	0.916334
AT1G22330	Chr1	7886541	7889534	0.963742	1.79257		AT1G51840	Chr1	19249448	19250709	2.94154	2.86121
AT1G22370	Chr1	7898012	7899879	1.42126	1.78586		AT1G51980	Chr1	19323381	19326916	0.931572	0.845805
AT1G22400	Chr1	7903659	7906673	1.57247	3.18058		AT1G53340	Chr1	19898927	19900931	2.22184	1.77044
AT1G22490	Chr1	7938250	7940592	2.01772	2.42601		AT1G55390	Chr1	20680875	20683043	2.49412	2.42857
AT1G22570	Chr1	7976619	7978573	1.94877	2.75902		AT1G59660	Chr1	21924692	21929424	0.683558	0.618232
AT1G23090	Chr1	8184951	8189064	1.04639	1.4486		AT1G62300	Chr1	23016682	23019279	3.96692	3.39563
AT1G24147	Chr1	8542445	8543474	2.04281	2.88513		AT1G62440	Chr1	23111817	23115293	2.45246	1.88794
AT1G24260	Chr1	8593636	8596105	5.16118	6.03938		AT1G62560	Chr1	23159822	23162649	1.92657	1.50322
AT1G24400	Chr1	8651406	8653828	1.51927	2.47478		AT1G63440	Chr1	23527654	23531109	0.812802	0.740054
AT1G25425	Chr1	8922699	8923331	1.9258	2.24718		AT1G63700	Chr1	23624665	23629112	0.84574	0.707138
AT1G25440	Chr1	8933715	8935460	0.95422	2.81536		AT1G63710	Chr1	23632177	23633942	2.22894	1.75318
AT1G26380	Chr1	9126736	9128528	1.93471	2.45284		AT1G64700	Chr1	24039809	24040595	2.12446	1.65022
AT1G26560	Chr1	9178377	9181835	0.853177	1.57983		AT1G65180	Chr1	24211740	24213870	2.01947	2.00283
AT1G28610	Chr1	10053616	10055731	1.32595	1.71227		AT1G67710	Chr1	25376750	25379144	1.48509	1.14429
AT1G28660	Chr1	10071711	10073411	1.40387	1.78697		AT1G68470	Chr1	25676394	25678288	1.97504	1.82291
AT1G29660	Chr1	10371838	10373766	1.2067	1.23618		AT1G68825	Chr1	25869699	25870420	2.82061	1.92861
AT1G29720	Chr1	10393796	10399873	0.83842	1.14226		AT1G68850	Chr1	25883615	25885247	2.75566	2.25446
AT1G33540	Chr1	12162348	12164700	2.4353	2.79582		AT1G70170	Chr1	26423873	26425356	3.86761	3.68961
AT1G33600	Chr1	12180775	12182363	1.0279	2.02778		AT1G70560	Chr1	26604854	26607503	2.7129	1.83399
AT1G33720	Chr1	12220896	12224000	1.74854	2.33957		AT1G70920	Chr1	26735955	26738665	3.10578	1.99083
AT1G35330	Chr1	12965045	12966113	2.71433	3.07658		AT1G71050	Chr1	26803152	26804292	3.95057	2.55929
AT1G35350	Chr1	12981250	12984583	0.950129	0.97825		AT1G71400	Chr1	26909834	26912597	1.00449	0.882331
AT1G44350	Chr1	16834209	16838286	2.19378	2.52269		AT1G71940	Chr1	27078523	27080248	0.793834	0.769276
AT1G45191	Chr1	17116043	17119174	0.839963	1.4191		AT1G72230	Chr1	27188065	27189244	2.65862	1.98043
AT1G47600	Chr1	17491731	17494759	3.19352	3.81454		AT1G72490	Chr1	27288899	27291042	1.9032	1.37673
AT1G47603	Chr1	17496838	17498110	2.88918	3.40956		AT1G73010	Chr1	27464571	27466256	3.53737	2.77688
AT1G47620	Chr1	17507941	17509702	0.960547	1.3352		AT1G75160	Chr1	28209436	28211804	2.36058	2.11175
AT1G48270	Chr1	17827952	17830420	0.696496	0.71355		AT1G75500	Chr1	28337725	28340275	1.77001	1.52154
AT1G48500	Chr1	17931475	17934662	1.63291	1.92921		AT1G75520	Chr1	28351561	28353495	5.1419	5.04138
AT1G49430	Chr1	18291042	18295825	1.67355	1.89254		AT1G77600	Chr1	29152747	29162448	0.76618	0.665761
AT1G51270	Chr1	19007509	19011272	2.96555	3.56284		AT1G77750	Chr1	29230153	29231524	0.775837	0.726919
AT1G51460	Chr1	19076981	19081433	1.38703	1.392		AT1G78320	Chr1	29467436	29468374	1.48732	1.11849
AT1G51800	Chr1	19214147	19217970	0.895504	1.10386		AT1G79450	Chr1	29887688	29890179	2.22376	1.33016
AT1G51805	Chr1	19220976	19225690	1.62494	2.48797		AT2G02480	Chr2	660742	665635	0.674059	0.66704
AT1G51820	Chr1	19237406	19241883	2.04328	2.14386		AT2G03480	Chr2	1050841	1054613	0.819169	0.694503
AT1G51850	Chr1	19252846	19256783	1.8269	2.22887		AT2G03505	Chr2	1064235	1065372	1.11646	0.845019
AT1G51860	Chr1	19257633	19261479	1.06514	1.24629		AT2G04100	Chr2	1376889	1379130	2.09336	1.77307
AT1G51870	Chr1	19262878	19267001	2.15863	3.00905		AT2G14580	Chr2	6225534	6226224	2.32166	2.29707
AT1G51880	Chr1	19270192	19274068	2.15673	2.95586		AT2G16980	Chr2	7376348	7381103	2.6897	1.3135
AT1G51890	Chr1	19274657	19278528	1.13278	1.54085		AT2G17760	Chr2	7713313	7716464	0.944721	0.858461
AT1G52000	Chr1	19333158	19336115	0.947731	1.79682		AT2G18980	Chr2	8233334	8235316	1.41209	1.33338
AT1G52040	Chr1	19350374	19352782	2.33923	2.673		AT2G18990	Chr2	8238690	8240002	0.84181	0.770683
AT1G52050	Chr1	19354918	19356764	3.08597	3.54472		AT2G19110	Chr2	8278880	8286445	1.07566	0.768982
AT1G52070	Chr1	19364887	19366924	3.33117	4.31488		AT2G19170	Chr2	8314004	8318596	0.653089	0.643348
AT1G52110	Chr1	19386788	19389740	2.65858	3.49375		AT2G21840	Chr2	9307059	9310058	1.52404	1.44172
AT1G52120	Chr1	19396080	19398244	3.47303	4.19871		AT2G23100	Chr2	9837119	9839736	2.13678	2.02128
AT1G52190	Chr1	19434508	19438971	1.88682	2.03277		AT2G24260	Chr2	10319333	10322222	4.48228	1.92781
AT1G53160	Chr1	19806418	19807608	1.57854	1.7905		AT2G26695	Chr2	11365097	11365965	2.46459	1.79016
AT1G53350	Chr1	19903898	19907515	0.939541	1.21103		AT2G28800	Chr2	12356363	12359252	0.971302	0.925118
AT1G53700	Chr1	20048585	20050115	3.24761	3.42607		AT2G28830	Chr2	12366747	12370684	1.32424	1.25226
AT1G55420	Chr1	20691774	20693952	2.79663	2.90294		AT2G29130	Chr2	12524888	12527747	2.15986	1.68836
AT1G55430	Chr1	20697648	20699622	2.70121	3.5927		AT2G29650	Chr2	12673382	12676049	0.827699	0.662433
AT1G56150	Chr1	21017384	21017939	1.85162	2.77128		AT2G37440	Chr2	15718052	15722108	2.29153	1.70575
AT1G56510	Chr1	21167588	21173632	1.01342	1.77375		AT2G37600	Chr2	15774244	15775374	0.860413	0.854988
AT1G56520	Chr1	21174663	21178974	1.14379	2.14797		AT2G38970	Chr2	16273900	16276872	0.686257	0.618438
AT1G56540	Chr1	21181663	21185306	1.80802	2.36257		AT2G40360	Chr2	16852879	16856690	0.831758	0.751129
AT1G56550	Chr1	21185661	21188369	1.58869	2.15783		AT2G42570	Chr2	17717366	17720080	1.0922	0.921394
AT1G57570	Chr1	21320937	21324637	2.6393	3.45178		AT2G45830	Chr2	18866060	18868542	2.22013	0.976409
AT1G57820	Chr1	21414169	21417946	0.890914	1.0197		AT2G46590	Chr2	19133039	19135289	3.00149	1.44049
AT1G58037	Chr1	21472964	21474602	1.68892	2.58562		AT2G47460	Chr2	19476336	19479478	2.67236	1.24375
AT1G59620	Chr1	21902283	21905685	0.810885	1.30102		AT3G01900	Chr3	312358	313849	3.43733	3.41898
AT1G61080	Chr1	22493193	22497019	1.04269	1.57518		AT3G02220	Chr3	412068	413634	0.78391	0.71197
AT1G61120	Chr1	22523636	22528811	3.94843	4.58857		AT3G03250	Chr3	749389	754159	1.00473	0.831149
AT1G62030	Chr1	22924249	22926598	1.59528	2.66756		AT3G03530	Chr3	842498	845043	1.92761	1.36098
AT1G62290	Chr1	23009910	23013529	1.65089	2.11689		AT3G04160	Chr3	1091146	1094346	0.983316	0.915232
AT1G62360	Chr1	23058581	23061722	4.29625	5.97135		AT3G06980	Chr3	2201466	2204833	0.811243	0.687435
AT1G62500	Chr1	23132044	23133502	4.94563	6.32758		AT3G07490	Chr3	2391188	2391650	3.39282	2.78347
AT1G62630	Chr1	23185911	23188593	1.04189	1.79802		AT3G08650	Chr3	2624460	2627450	0.801517	0.730562
AT1G63240	Chr1	23456020	23458661	0.819756	1.25776		AT3G10340	Chr3	3204012	3208022	2.67287	1.63401
AT1G63350	Chr1	23494934	23497631	1.20821	1.85242		AT3G11130	Chr3	3482148	3491908	0.882846	0.845216
AT1G63360	Chr1	23499514	23502169	0.953986	1.9994		AT3G11150	Chr3	3492866	3494653	4.05379	3.40708
AT1G63450	Chr1	23531408	23534569	1.89289	1.97092		AT3G11430	Chr3	3595764	3597952	4.3963	3.9792
AT1G63880	Chr1	23712275	23716124	1.00299	2.41442		AT3G14560	Chr3	4889071	4890159	2.03667	1.21075
AT1G63930	Chr1	23727890	23729333	1.6398	2.27813		AT3G16360	Chr3	5554257	5555603	2.12844	2.08683
AT1G64000	Chr1	23747303	23749053	3.57881	4.50172		AT3G18280	Chr3	6267048	6267643	3.68418	2.69384
AT1G64780	Chr1	24060769	24062630	1.71369	3.45012		AT3G18610	Chr3	6404082	6407822	1.89893	1.18359
AT1G65470	Chr1	24319669	24324064	0.775682	0.815108		AT3G20590	Chr3	7191685	7192453	3.6201	3.27257
AT1G65480	Chr1	24331427	24333934	3.17636	3.54227		AT3G21230	Chr3	7448039	7452000	1.07866	0.87314
AT1G65620	Chr1	24398142	24400969	4.5951	5.51269		AT3G21600	Chr3	7606506	7608407	1.44501	1.21572
AT1G65730	Chr1	24442503	24446291	2.31589	2.71992		AT3G22415	Chr3	7941013	7941564	2.12434	1.88079
AT1G65790	Chr1	24468931	24472329	1.30193	1.54261		AT3G23050	Chr3	8194678	8197153	3.51802	3.26539
AT1G65850	Chr1	24494677	24498542	2.76792	3.11791		AT3G23430	Chr3	8387507	8393296	1.75679	1.21611
AT1G65860	Chr1	24499065	24502745	3.02125	3.30173		AT3G23550	Chr3	8448272	8450697	1.90403	1.74942
AT1G65870	Chr1	24503623	24504193	2.16757	3.94758		AT3G23560	Chr3	8454115	8456681	1.21299	1.02594
AT1G65900	Chr1	24515836	24518487	0.806878	0.869918		AT3G24240	Chr3	8780423	8784368	0.866185	0.687559
AT1G66020	Chr1	24577552	24580185	2.60888	2.90935		AT3G24430	Chr3	8868582	8872201	0.939795	0.748603
AT1G66130	Chr1	24614961	24616930	0.96783	1.75859		AT3G25780	Chr3	9409289	9410567	2.00213	1.07526
AT1G66230	Chr1	24677153	24678415	0.958492	1.33176		AT3G44990	Chr3	16446974	16448764	2.44334	1.61283
AT1G66690	Chr1	24869553	24870850	1.87803	2.00087		AT3G45600	Chr3	16733754	16735951	0.996972	0.990071
AT1G66840	Chr1	24933855	24936322	0.91436	1.4573		AT3G48260	Chr3	17873011	17875220	2.39485	2.18912
AT1G66910	Chr1	24961633	24963946	0.832049	1.58514		AT3G49290	Chr3	18272424	18275341	1.02045	1.01847
AT1G66950	Chr1	24978204	24984619	1.66084	2.15792		AT3G50570	Chr3	18766748	18767529	3.00915	2.70651
AT1G66960	Chr1	24984940	24989797	2.11796	2.81176		AT3G50670	Chr3	18826299	18829618	0.804662	0.782573
AT1G66970	Chr1	24992552	24996117	0.818376	1.54751		AT3G55120	Chr3	20430113	20431470	1.66278	1.53692
AT1G66980	Chr1	24997308	25001983	0.80125	1.88024		AT3G60720	Chr3	22441770	22443771	2.53692	1.78235
AT1G67870	Chr1	25449366	25451012	2.04769	2.92002		AT3G62700	Chr3	23190266	23195762	0.800413	0.716215
AT1G68260	Chr1	25585775	25587658	0.984787	1.06663		AT3G62730	Chr3	23207853	23209471	2.80861	2.24924
AT1G68530	Chr1	25712587	25714807	2.9966	4.59233		AT4G01140	Chr4	490748	492199	1.84956	1.33625
AT1G68570	Chr1	25746735	25750275	1.03035	1.42832		AT4G01430	Chr4	585597	588029	4.30093	2.93086
AT1G68600	Chr1	25759841	25762934	1.15969	1.74583		AT4G01440	Chr4	596398	598718	3.33724	2.25035
AT1G68810	Chr1	25861122	25863120	4.45076	5.90564		AT4G01450	Chr4	608453	610724	3.12659	1.67959
AT1G69160	Chr1	26000213	26001588	1.28432	2.93074		AT4G02660	Chr4	1159666	1174321	0.729888	0.708662
AT1G69690	Chr1	26216223	26217851	1.63203	4.40759		AT4G05110	Chr4	2626404	2628830	1.78884	1.56541
AT1G70210	Chr1	26439863	26442829	0.748978	1.64516		AT4G11290	Chr4	6869952	6871661	2.79292	2.70159
AT1G70250	Chr1	26452964	26456088	2.08374	3.02691		AT4G12060	Chr4	7228006	7229941	1.0721	0.743913
AT1G70830	Chr1	26709946	26711462	3.19402	4.36885		AT4G13130	Chr4	7647388	7649831	1.29183	1.14172
AT1G71380	Chr1	26899783	26901789	1.88098	2.46488		AT4G13310	Chr4	7750304	7753133	2.30196	2.10437
AT1G71960	Chr1	27082393	27088248	0.941706	1.16935		AT4G14640	Chr4	8397711	8400076	1.63119	1.5229
AT1G72200	Chr1	27169794	27171321	1.7092	1.86159		AT4G17030	Chr4	9581585	9583290	3.0992	2.47088
AT1G72520	Chr1	27308514	27312754	1.33139	1.91057		AT4G18710	Chr4	10296272	10301228	1.38882	1.25682
AT1G73830	Chr1	27759972	27761588	1.6244	2.8454		AT4G19710	Chr4	10724854	10729768	0.905931	0.789882
AT1G73870	Chr1	27779165	27780676	1.49307	3.62649		AT4G19980	Chr4	10828152	10828536	3.1929	1.5977
AT1G74810	Chr1	28108473	28111534	0.648258	0.784776		AT4G20050	Chr4	10849781	10853346	1.40099	1.29155
AT1G75040	Chr1	28177702	28178940	1.65994	2.00546		AT4G20210	Chr4	10913612	10918282	2.22897	1.82729
AT1G75240	Chr1	28241071	28242756	1.24679	5.62848		AT4G22810	Chr4	11984139	11985702	4.54574	3.8403
AT1G75250	Chr1	28244316	28245501	2.66309	2.68859		AT4G23550	Chr4	12291819	12293096	3.499	3.36208
AT1G75490	Chr1	28335501	28336706	2.30938	3.23713		AT4G24480	Chr4	12649986	12654984	0.792312	0.699324
AT1G76610	Chr1	28750987	28751851	3.38376	4.70186		AT4G25410	Chr4	12985754	12987217	4.53417	4.11508
AT1G78450	Chr1	29516988	29517933	3.08319	3.59461		AT4G28730	Chr4	14199095	14200901	0.90508	0.846914
AT1G78460	Chr1	29518315	29519323	3.33101	4.18638		AT4G29230	Chr4	14410337	14414956	4.23772	3.64535
AT1G79840	Chr1	30036955	30041440	2.38584	3.19419		AT4G29900	Chr4	14610882	14619573	0.790939	0.734825
AT1G79860	Chr1	30042091	30044175	2.67865	3.05128		AT4G32460	Chr4	15662265	15665013	1.15009	1.02494
AT1G80080	Chr1	30128004	30129591	0.746997	0.946902		AT4G33770	Chr4	16193421	16196428	0.706284	0.694021
AT1G80770	Chr1	30355114	30357964	0.697026	0.757262		AT4G33780	Chr4	16201830	16203641	1.05189	0.798313
AT2G01940	Chr2	432274	435077	3.35519	3.80095		AT4G33800	Chr4	16210008	16211409	3.54844	2.76066
AT2G02070	Chr2	505486	509425	2.79963	4.29687		AT4G33810	Chr4	16213323	16215594	2.87461	2.56519
AT2G02080	Chr2	518158	521707	3.17348	4.95858		AT4G35160	Chr4	16730759	16732811	3.29669	1.85383
AT2G02450	Chr2	648043	650814	4.32112	5.18314		AT4G36530	Chr4	17239957	17241937	0.815193	0.615661
AT2G02540	Chr2	683646	685309	2.27042	4.64031		AT4G37580	Chr4	17658611	17660878	1.47422	1.161
AT2G03980	Chr2	1259198	1262552	0.983912	1.03505		AT4G37650	Chr4	17691785	17693760	4.2242	2.81085
AT2G04080	Chr2	1357188	1359253	1.04337	1.47871		AT4G39950	Chr4	18525245	18527579	3.79967	3.50424
AT2G14080	Chr2	5925185	5929600	0.966447	1.85291		AT5G02780	Chr5	630875	632683	1.47325	1.11006
AT2G14560	Chr2	6213971	6215901	2.09783	2.6531		AT5G03570	Chr5	903755	906664	1.7068	1.4166
AT2G14610	Chr2	6241703	6242463	4.36242	4.65029		AT5G03610	Chr5	915464	918485	1.2893	0.987164
AT2G14620	Chr2	6244780	6246233	1.73518	2.19636		AT5G03900	Chr5	1048294	1052387	0.907204	0.817578
AT2G15042	Chr2	6510164	6512637	0.99808	1.08176		AT5G06740	Chr5	2084093	2086052	0.989645	0.78647
AT2G15080	Chr2	6533686	6536995	1.3066	1.63762		AT5G10110	Chr5	3166438	3168297	0.881997	0.755168
AT2G15090	Chr2	6542255	6543947	1.52189	2.10727		AT5G11180	Chr5	3557260	3561575	1.62617	1.51284
AT2G17060	Chr2	7422410	7426877	1.84351	2.31248		AT5G11580	Chr5	3718809	3721334	0.839436	0.745049
AT2G17070	Chr2	7430862	7431654	1.69628	2.27182		AT5G12280	Chr5	3971799	3973644	1.44835	1.11124
AT2G17080	Chr2	7433325	7434117	1.52166	2.03808		AT5G12330	Chr5	3987374	3989833	4.25385	2.35863
AT2G17780	Chr2	7724884	7727404	0.971359	1.3359		AT5G12340	Chr5	3992947	3993610	4.68717	4.25809
AT2G20340	Chr2	8779734	8782772	0.876104	0.987124		AT5G14920	Chr5	4826478	4827980	1.87843	1.83633
AT2G20570	Chr2	8855357	8857756	1.98596	4.31175		AT5G17450	Chr5	5755321	5756888	1.71989	1.48324
AT2G22980	Chr2	9778876	9783251	1.58708	2.41884		AT5G18460	Chr5	6122866	6126721	2.29278	2.01828
AT2G22990	Chr2	9786315	9790179	1.00135	1.80243		AT5G18690	Chr5	6233518	6234206	2.60355	1.32375
AT2G23000	Chr2	9792211	9795863	1.13174	1.89497		AT5G18930	Chr5	6311724	6313323	2.31952	1.86487
AT2G23410	Chr2	9966129	9967772	1.53662	2.36871		AT5G19100	Chr5	6408241	6409417	1.58343	1.32423
AT2G23600	Chr2	10042198	10043673	1.03837	1.21589		AT5G19560	Chr5	6603290	6606448	1.43543	1.11551
AT2G23840	Chr2	10153796	10155647	0.966752	2.35752		AT5G23940	Chr5	8076328	8079793	2.50969	2.12473
AT2G24520	Chr2	10415431	10419783	0.761413	0.847934		AT5G24090	Chr5	8143698	8145252	3.57638	2.71975
AT2G24850	Chr2	10582829	10585216	2.45691	3.01818		AT5G26340	Chr5	9243510	9247066	1.7315	1.29396
AT2G25130	Chr2	10695181	10697000	1.32317	1.43538		AT5G27920	Chr5	9941904	9944778	1.01261	0.761815
AT2G25980	Chr2	11077487	11079918	1.56442	1.81405		AT5G38970	Chr5	15594673	15597885	1.30497	1.14987
AT2G26250	Chr2	11170417	11173142	2.32528	3.20288		AT5G42690	Chr5	17116427	17119838	1.49267	0.974254
AT2G26330	Chr2	11208182	11213971	0.750457	1.51557		AT5G43030	Chr5	17258990	17260685	3.1907	2.85145
AT2G26440	Chr2	11247382	11249493	1.01354	1.52317		AT5G44020	Chr5	17712408	17714336	2.47468	2.01185
AT2G26580	Chr2	11303589	11306953	4.03321	5.56452		AT5G44160	Chr5	17772940	17775686	3.82396	3.34915
AT2G26690	Chr2	11347146	11350993	1.13518	1.87649		AT5G45090	Chr5	18202752	18205000	2.32335	2.19932
AT2G26870	Chr2	11457007	11459365	2.74027	3.56119		AT5G48070	Chr5	19482105	19483452	2.16843	1.86443
AT2G27990	Chr2	11921432	11924698	2.71639	3.37822		AT5G48790	Chr5	19779859	19782050	0.81987	0.701696
AT2G28960	Chr2	12437913	12442347	3.14401	3.61957		AT5G49660	Chr5	20161205	20164729	1.35025	1.18229
AT2G28970	Chr2	12443918	12448163	2.60862	3.17103		AT5G49810	Chr5	20239342	20246380	0.876764	0.724143
AT2G28990	Chr2	12455054	12459541	3.0457	3.7813		AT5G50000	Chr5	20342586	20345133	0.802193	0.783587
AT2G29020	Chr2	12469723	12471700	0.84475	0.920633		AT5G50175	Chr5	20428094	20428719	2.75097	1.73401
AT2G29090	Chr2	12494850	12499723	1.91476	3.36225		AT5G53110	Chr5	21529021	21533159	0.978044	0.891781
AT2G29110	Chr2	12506879	12510552	2.10031	2.2937		AT5G54790	Chr5	22253985	22255663	4.24073	3.6353
AT2G29310	Chr2	12590057	12591363	1.00334	1.51886		AT5G54800	Chr5	22261270	22263921	1.82813	0.736815
AT2G29320	Chr2	12592147	12593686	1.11773	1.85477		AT5G56240	Chr5	22759802	22764587	1.83007	1.3598
AT2G30230	Chr2	12897070	12897885	1.40127	2.71572		AT5G56970	Chr5	23044943	23048268	2.86491	2.79507
AT2G30340	Chr2	12931218	12932582	2.67545	3.27105		AT5G57670	Chr5	23360399	23363757	1.78155	1.54445
AT2G30420	Chr2	12960826	12962162	1.12024	2.00534		AT5G57780	Chr5	23405323	23406351	4.49589	4.32556
AT2G31070	Chr2	13220477	13222609	1.37473	4.19213		AT5G59090	Chr5	23851904	23855275	1.60774	1.25195
AT2G31083	Chr2	13252218	13252765	4.37279	5.72232		AT5G59780	Chr5	24082196	24083431	0.975082	0.895323
AT2G32530	Chr2	13809215	13813570	1.8517	3.00769
AT2G32540	Chr2	13814685	13818289	2.43695	3.03064
AT2G32550	Chr2	13819378	13822839	1.7415	2.14763
AT2G32620	Chr2	13840743	13844324	2.21868	2.60634
AT2G32870	Chr2	13944610	13946790	2.9117	3.6308
AT2G36780	Chr2	15417489	15419154	1.77859	2.27624
AT2G36970	Chr2	15529005	15530749	1.4929	2.49351
AT2G38995	Chr2	16282119	16284868	1.76272	2.22157
AT2G39010	Chr2	16291476	16294034	1.45941	3.74481
AT2G39850	Chr2	16630472	16634253	2.20294	2.52253
AT2G39855	Chr2	16637676	16639308	2.17481	2.33859
AT2G40435	Chr2	16886823	16888638	3.36223	5.04602
AT2G40475	Chr2	16906910	16908128	3.71038	4.45405
AT2G40520	Chr2	16922586	16925914	1.39322	2.12127
AT2G40610	Chr2	16948862	16950557	1.16844	2.66282
AT2G41850	Chr2	17461654	17464161	4.08035	4.49552
AT2G42200	Chr2	17587406	17589630	0.657418	1.09507
AT2G42540	Chr2	17711031	17712330	2.00007	3.30288
AT2G42840	Chr2	17826115	17827536	1.59411	1.81848
AT2G42870	Chr2	17836415	17837250	1.02206	1.7936
AT2G43000	Chr2	17880614	17882636	2.54299	3.34242
AT2G43520	Chr2	18068424	18069168	1.55158	3.84956
AT2G43620	Chr2	18093769	18095025	2.35518	2.84519
AT2G45180	Chr2	18626319	18626997	1.05825	1.40964
AT2G46720	Chr2	19197382	19200221	1.37791	1.62457
AT3G01070	Chr3	19591	20719	0.702019	0.703481
AT3G01680	Chr3	251980	255513	0.96426	1.12837
AT3G02150	Chr3	391056	392758	3.27703	5.41656
AT3G04210	Chr3	1105962	1108069	1.00874	1.46116
AT3G04290	Chr3	1133319	1136316	2.81575	3.79361
AT3G05400	Chr3	1549585	1554176	2.99961	3.5522
AT3G06990	Chr3	2206386	2208058	1.8264	2.15595
AT3G07960	Chr3	2534886	2538372	0.626997	0.663109
AT3G08500	Chr3	2576793	2578246	3.81669	4.21808
AT3G09790	Chr3	3003861	3006192	0.974499	1.78801
AT3G10470	Chr3	3260350	3261854	1.81442	2.71157
AT3G10520	Chr3	3276225	3277860	1.54662	1.70723
AT3G10525	Chr3	3281361	3282032	1.51332	2.88041
AT3G10720	Chr3	3354446	3357614	0.910421	1.38024
AT3G11110	Chr3	3479978	3480455	2.81225	5.20912
AT3G11370	Chr3	3561098	3562880	1.26104	2.3632
AT3G11385	Chr3	3566577	3568878	1.32746	1.95587
AT3G11390	Chr3	3569827	3571960	1.96134	3.00245
AT3G12900	Chr3	4104575	4106112	3.79681	4.96933
AT3G13790	Chr3	4532910	4535867	1.78584	1.8807
AT3G14770	Chr3	4957333	4959704	0.800893	0.835433
AT3G17130	Chr3	5844494	5845046	1.28545	2.56298
AT3G18010	Chr3	6161136	6163272	3.73805	5.32606
AT3G18670	Chr3	6424134	6426471	1.23261	1.63243
AT3G19270	Chr3	6673726	6676520	2.80063	3.19171
AT3G19430	Chr3	6736183	6738330	1.68834	2.17295
AT3G19710	Chr3	6846968	6849497	2.79583	3.17727
AT3G19850	Chr3	6898180	6901255	1.13317	1.80399
AT3G21550	Chr3	7591482	7592322	2.2317	2.57608
AT3G22760	Chr3	8044454	8047530	0.808832	1.18657
AT3G23840	Chr3	8611125	8612690	1.64369	2.31604
AT3G24255	Chr3	8788852	8793371	0.297078	0.332283
AT3G26200	Chr3	9589281	9591179	4.05605	5.36528
AT3G26210	Chr3	9593131	9595243	0.982207	1.1727
AT3G26280	Chr3	9630199	9632009	1.57294	1.87761
AT3G26290	Chr3	9632681	9634470	1.53543	2.34103
AT3G26320	Chr3	9644382	9646064	1.57008	2.15602
AT3G27490	Chr3	10178099	10180148	2.00421	2.44715
AT3G28080	Chr3	10451485	10455267	1.0846	1.8384
AT3G29030	Chr3	11011307	11013358	1.57479	2.22719
AT3G44970	Chr3	16432442	16434848	2.32942	3.45867
AT3G45260	Chr3	16596380	16598698	2.51667	4.2898
AT3G45280	Chr3	16611412	16613340	4.16575	4.71991
AT3G46090	Chr3	16926215	16926850	4.68397	4.71932
AT3G46200	Chr3	16969265	16971204	0.767623	0.808672
AT3G46330	Chr3	17020746	17025011	1.86259	2.64542
AT3G46370	Chr3	17051954	17055514	2.93096	3.06132
AT3G46400	Chr3	17073195	17077328	1.57079	2.20451
AT3G46490	Chr3	17115628	17119451	1.13782	1.20209
AT3G46500	Chr3	17120479	17122745	1.43668	1.72965
AT3G46530	Chr3	17130366	17133338	0.760265	1.17283
AT3G46800	Chr3	17234493	17236542	2.6107	3.60236
AT3G47040	Chr3	17324161	17327152	1.20212	1.44806
AT3G47050	Chr3	17328032	17330889	1.26533	1.56955
AT3G47250	Chr3	17399876	17401731	0.874165	1.5588
AT3G47290	Chr3	17420509	17423588	0.704545	1.56473
AT3G47400	Chr3	17465589	17468118	1.86172	2.63511
AT3G47740	Chr3	17600650	17604965	1.50279	2.07066
AT3G47760	Chr3	17611786	17616639	1.84784	2.68206
AT3G47770	Chr3	17618054	17622678	2.14665	2.9787
AT3G48280	Chr3	17879565	17881312	2.42826	3.6216
AT3G48290	Chr3	17882555	17884270	3.51595	4.10423
AT3G48310	Chr3	17888100	17889814	2.61368	3.3304
AT3G48550	Chr3	17993998	17994734	4.55507	5.06387
AT3G49220	Chr3	18249775	18253839	0.731004	0.993271
AT3G49260	Chr3	18262398	18266021	1.17489	2.69372
AT3G51420	Chr3	19084034	19085858	1.67982	3.24661
AT3G52525	Chr3	19475158	19475961	2.77184	3.65911
AT3G53960	Chr3	19978121	19980959	0.903523	1.66235
AT3G54400	Chr3	20140057	20142642	1.04002	1.25935
AT3G54820	Chr3	20302020	20304010	1.17241	1.62271
AT3G55110	Chr3	20424549	20427377	3.18409	4.27327
AT3G55130	Chr3	20433877	20436390	3.19462	4.2781
AT3G55580	Chr3	20612699	20615920	1.69281	2.22904
AT3G56710	Chr3	21006749	21007565	1.42839	2.30203
AT3G56891	Chr3	21064198	21064922	2.53472	3.44787
AT3G57130	Chr3	21147557	21150027	4.52818	5.63016
AT3G57670	Chr3	21370902	21373446	4.58597	5.16028
AT3G60670	Chr3	22424511	22426288	3.53059	4.62112
AT3G61470	Chr3	22745652	22747282	0.716804	1.80697
AT3G61970	Chr3	22951462	22952851	2.582	4.6791
AT4G00220	Chr4	90035	92237	4.13188	5.48807
AT4G00380	Chr4	167958	170974	0.927342	1.67457
AT4G00730	Chr4	299358	304508	2.41348	4.25366
AT4G01410	Chr4	578164	579169	1.7791	2.55492
AT4G01460	Chr4	620758	622945	2.58878	4.46943
AT4G01970	Chr4	853921	857008	0.627638	0.738742
AT4G02180	Chr4	959963	963517	1.24086	1.8412
AT4G04890	Chr4	2476488	2482345	2.47839	3.36641
AT4G08450	Chr4	5365609	5371101	1.63774	2.02367
AT4G11610	Chr4	7013728	7018049	1.29949	1.58962
AT4G11900	Chr4	7150240	7153571	0.866968	1.30149
AT4G12980	Chr4	7589394	7591102	0.887154	1.68068
AT4G13250	Chr4	7684155	7686876	0.896101	1.70316
AT4G13300	Chr4	7742870	7746363	2.77603	3.11178
AT4G13572	Chr4	7887439	7888638	2.87774	4.22991
AT4G13770	Chr4	7990484	7992311	2.0369	2.53059
AT4G14540	Chr4	8344615	8345218	0.672227	2.96291
AT4G15350	Chr4	8762952	8764594	2.43093	3.95792
AT4G15400	Chr4	8811927	8813478	3.24368	4.65561
AT4G15440	Chr4	8835494	8838676	1.5861	2.10995
AT4G15490	Chr4	8852697	8854545	1.86406	2.67128
AT4G15660	Chr4	8925805	8926310	3.27089	3.95354
AT4G16920	Chr4	9519172	9525691	0.589329	0.647513
AT4G16990	Chr4	9560134	9565555	1.59986	2.69044
AT4G18170	Chr4	10061372	10062841	4.33983	5.07112
AT4G18550	Chr4	10224920	10226862	2.5524	3.10559
AT4G19030	Chr4	10421524	10423487	2.74651	2.99594
AT4G19380	Chr4	10568364	10572412	2.28881	2.53666
AT4G19510	Chr4	10633684	10639001	0.809883	0.81802
AT4G19520	Chr4	10639268	10647079	1.45125	3.11146
AT4G19530	Chr4	10651743	10657282	0.848773	1.33432
AT4G19820	Chr4	10767435	10768614	2.51008	3.60657
AT4G21750	Chr4	11555185	11560733	2.72352	3.44668
AT4G22070	Chr4	11691377	11694392	4.23164	4.71163
AT4G22080	Chr4	11700554	11702666	3.44144	3.9429
AT4G23020	Chr4	12066172	12068538	1.72776	3.34683
AT4G23170	Chr4	12135092	12136157	1.19817	2.62057
AT4G23570	Chr4	12299822	12302719	1.06567	1.93044
AT4G23590	Chr4	12307125	12309647	3.53208	4.32828
AT4G23700	Chr4	12342427	12346043	1.52697	1.82672
AT4G23990	Chr4	12456488	12460753	1.69348	2.98731
AT4G24660	Chr4	12724742	12725637	1.49936	5.93431
AT4G24670	Chr4	12727833	12731274	0.843144	1.47999
AT4G25020	Chr4	12860633	12861975	2.35191	3.66948
AT4G25830	Chr4	13133528	13135024	1.34092	1.48982
AT4G29920	Chr4	14632652	14635885	0.657139	0.761217
AT4G32990	Chr4	15920229	15922658	0.836425	1.2595
AT4G33720	Chr4	16182751	16183533	3.21025	4.34794
AT4G33880	Chr4	16239362	16241137	3.65254	4.55246
AT4G34250	Chr4	16394707	16396495	2.9559	3.88834
AT4G34900	Chr4	16625554	16631327	0.578943	0.842031
AT4G36220	Chr4	17137343	17139635	1.8424	3.39251
AT4G36250	Chr4	17150868	17153578	1.22454	1.48178
AT4G36270	Chr4	17161023	17165241	1.06083	1.56075
AT4G36280	Chr4	17165330	17169375	1.67048	3.11254
AT4G36870	Chr4	17368964	17373930	1.23957	4.01192
AT4G36880	Chr4	17374457	17376225	0.782614	0.787099
AT4G37750	Chr4	17739513	17742401	1.80045	3.01297
AT4G38860	Chr4	18130267	18131060	1.39181	3.23496
AT4G38950	Chr4	18154394	18159936	0.633689	0.730205
AT5G01075	Chr5	26847	27449	1.32813	2.06889
AT5G01240	Chr5	97893	101835	0.92976	1.3273
AT5G01330	Chr5	132318	134862	1.03489	1.51716
AT5G02260	Chr5	463157	465246	1.61757	1.98161
AT5G03830	Chr5	1018337	1020460	1.02401	1.04517
AT5G04230	Chr5	1160633	1163898	1.43469	1.47815
AT5G04690	Chr5	1349642	1352525	3.48409	4.76495
AT5G06640	Chr5	2039858	2041928	1.06086	1.74093
AT5G07700	Chr5	2450324	2451578	2.08083	2.67117
AT5G11060	Chr5	3510117	3513305	1.07791	4.11092
AT5G11190	Chr5	3564975	3566051	3.96047	4.32923
AT5G11420	Chr5	3644546	3647295	0.905824	1.63851
AT5G11530	Chr5	3695861	3701548	2.50162	2.59836
AT5G11540	Chr5	3703001	3704981	4.43865	4.9693
AT5G12420	Chr5	4024313	4026741	1.67866	2.07517
AT5G15310	Chr5	4974670	4976227	1.58987	1.96804
AT5G18910	Chr5	6306827	6309419	2.4296	2.87417
AT5G20220	Chr5	6821989	6825981	0.752102	0.979611
AT5G20230	Chr5	6826505	6827629	3.24843	3.9322
AT5G20710	Chr5	7010521	7014249	1.58956	1.89444
AT5G20790	Chr5	7039910	7040654	1.77464	2.07868
AT5G22300	Chr5	7379198	7381935	1.5675	2.67807
AT5G22355	Chr5	7401706	7403825	1.32679	1.69675
AT5G22410	Chr5	7426313	7427964	1.34515	1.74772
AT5G24160	Chr5	8183074	8186640	2.37482	3.26137
AT5G24205	Chr5	8210821	8213086	1.83307	2.89575
AT5G24210	Chr5	8217334	8219619	2.3401	4.24263
AT5G24410	Chr5	8332472	8334066	2.3514	2.95454
AT5G24900	Chr5	8563808	8566812	1.5296	1.62594
AT5G24940	Chr5	8591406	8593601	0.821468	3.93701
AT5G25130	Chr5	8668298	8670194	1.1545	2.18246
AT5G25970	Chr5	9066376	9067974	1.78847	2.15372
AT5G26000	Chr5	9079504	9082384	3.51935	4.6746
AT5G36110	Chr5	14195376	14197613	2.95034	3.42681
AT5G36220	Chr5	14253689	14256033	1.04694	2.19786
AT5G37300	Chr5	14767498	14770249	3.77137	4.94445
AT5G38410	Chr5	15377172	15378416	0.61952	1.48226
AT5G38420	Chr5	15380944	15382035	1.63905	1.77737
AT5G39000	Chr5	15611859	15614481	2.47707	2.98693
AT5G39090	Chr5	15643602	15645116	1.35804	1.96191
AT5G39420	Chr5	15772079	15775171	1.18601	1.47072
AT5G40380	Chr5	16151771	16155177	2.48611	3.09917
AT5G44120	Chr5	17756263	17758288	4.39582	4.99521
AT5G44130	Chr5	17761089	17762003	1.92564	2.57679
AT5G44260	Chr5	17829625	17831225	1.86675	2.25546
AT5G44770	Chr5	18065054	18066680	1.84488	3.00707
AT5G44870	Chr5	18114665	18118608	1.0797	2.24754
AT5G45200	Chr5	18283966	18290332	2.56766	2.75378
AT5G45220	Chr5	18298925	18301069	2.61789	3.8232
AT5G45530	Chr5	18454315	18457277	1.3711	1.55411
AT5G45810	Chr5	18584941	18586393	1.20212	1.35297
AT5G45830	Chr5	18589481	18591400	3.21521	4.71936
AT5G46260	Chr5	18759101	18763358	2.10307	3.17547
AT5G46270	Chr5	18764348	18769090	0.968244	1.91762
AT5G46490	Chr5	18850775	18853843	0.842107	1.14427
AT5G46880	Chr5	19031349	19035731	3.49703	4.30199
AT5G48060	Chr5	19475295	19479002	2.28216	2.71934
AT5G49270	Chr5	19971908	19974444	2.20091	2.41651
AT5G49320	Chr5	19995024	19996314	3.2045	3.80754
AT5G49330	Chr5	19998951	20001378	1.72481	3.18359
AT5G49360	Chr5	20011878	20016742	0.801002	1.18628
AT5G49770	Chr5	20222668	20227267	2.25492	3.04487
AT5G49850	Chr5	20259907	20262585	1.34736	1.58012
AT5G49870	Chr5	20270191	20272548	1.25772	1.68917
AT5G50940	Chr5	20724577	20726479	0.909763	0.96671
AT5G50950	Chr5	20729611	20733926	1.2049	1.56891
AT5G51490	Chr5	20913552	20915606	2.76235	3.43066
AT5G52290	Chr5	21230352	21236554	0.528124	0.64175
AT5G52410	Chr5	21275955	21279444	0.843613	0.906914
AT5G53210	Chr5	21586605	21588941	3.42576	4.15927
AT5G53760	Chr5	21822485	21826451	0.737791	0.740586
AT5G54030	Chr5	21925983	21927243	1.49888	1.85952
AT5G54040	Chr5	21928846	21930637	2.61756	2.99639
AT5G54050	Chr5	21933622	21935995	1.52433	1.73521
AT5G54710	Chr5	22227573	22230500	2.02738	2.70965
AT5G54770	Chr5	22246591	22248332	0.883182	1.81284
AT5G55930	Chr5	22652714	22656106	0.776859	0.946833
AT5G56450	Chr5	22858508	22860062	0.758865	0.847263
AT5G56850	Chr5	22985192	22988013	0.876274	1.9485
AT5G56860	Chr5	22989264	22991467	3.39875	6.12351
AT5G56990	Chr5	23060871	23062311	2.35903	3.8393
AT5G57500	Chr5	23286236	23287571	1.23225	1.50785
AT5G57660	Chr5	23355463	23356989	0.680788	0.887203
AT5G57790	Chr5	23412024	23413627	0.98324	1.24505
AT5G58390	Chr5	23599566	23601325	3.4104	4.54273
AT5G59030	Chr5	23833727	23834511	1.06369	4.5235
AT5G59130	Chr5	23870097	23873720	1.00144	1.25042
AT5G60910	Chr5	24502481	24506143	4.69063	5.18534
AT5G61070	Chr5	24571170	24574372	1.62221	2.85508
AT5G61280	Chr5	24643624	24644910	1.47695	1.81289
AT5G61740	Chr5	24808483	24812597	0.879948	1.34304
AT5G63140	Chr5	25328118	25329799	1.01551	1.39269
AT5G63180	Chr5	25340953	25343119	2.8436	4.28565
AT5G63660	Chr5	25485691	25486062	2.54409	3.07312
AT5G64110	Chr5	25654073	25656030	4.7651	5.19508
AT5G65400	Chr5	26131425	26133259	0.724734	1.92147
AT5G65410	Chr5	26136093	26137183	1.40302	6.54438
AT5G66300	Chr5	26479792	26481334	4.91865	5.90175
AT5G66390	Chr5	26515915	26517391	4.25293	5.08175
AT5G66580	Chr5	26572630	26573408	0.911468	1.60653
AT5G66700	Chr5	26634319	26635885	2.51145	2.56194
