# Supplementary material for: Polycomb-dependent differential chromatin compartmentalization determines gene coregulation in Arabidopsis
Source: HighWire-hosted journal article supplement (doi:10.1101/gr.273771.120), 2021-06-03
Supplement: Supplemental_Table_S11.xlsx [file Supplemental_Table_S11.xlsx]

## Sheet: S11
Supplementary Table S11: Differentially expressed genes spanning Top 2k HiChIP Root loops
geneIDs.1	log2FoldChange.1	padj.1	geneIDs.2	log2FoldChange.2	padj.2
AT5G46490	4.23768	5.82437180675689e-44	AT5G46470	0.726949	0.00168750164222977				Gene1_LFC>0	Gene1_LFC<0
AT4G14560	1.9175	1.41943416515898e-06	AT4G14550	0.787842	0.000193862916595207			Gene2_LFC>0	801	443
AT2G38995	6.80407	3.82457087055521e-33	AT2G38970	0.545547	8.14713739951192e-05			Gene2_LFC<0	425	331
AT3G44330	-0.691477	4.07613801952777e-12	AT3G44310	2.30503	1.52565802706459e-25
AT4G23300	8.62841	8.92301190476683e-122	AT4G23210	8.36994	1.67704854281403e-21			X2 (3, N = 2000) = 256.072, p=3.2e-55
AT4G16900	1.16585	7.73801154939317e-22	AT4G16890	2.55938	2.02741479868906e-44
AT1G11490	-2.32697	3.07386729699305e-05	AT1G11410	2.69295	5.91415232123747e-51
AT2G29310	4.53301	1.98735506102343e-59	AT2G29110	-2.08381	0.0123179555707828
AT4G16892	2.88438	6.73194512868525e-12	AT4G16890	2.55938	2.02741479868906e-44
AT5G49320	-1.13145	0.000407757544885185	AT5G49270	-5.69228	1.26009629022159e-77
AT1G75100	4.79109	1.63223266379802e-147	AT1G75030	-2.558	6.44568988494705e-08
AT1G09930	-3.24334	0.000662543924739576	AT1G09910	0.411279	9.98878235587565e-06
AT4G10340	7.13729	4.51128752337501e-195	AT4G10330	0.393418	0.0175821838535251
AT3G46540	2.06563	1.49190453383537e-55	AT3G46530	3.04631	3.50967758041196e-23
AT4G16892	2.88438	6.73194512868525e-12	AT4G16890	2.55938	2.02741479868906e-44
AT3G46400	-5.59772	2.67519618637992e-12	AT3G46330	-6.21046	3.45338698747857e-31
AT1G70830	2.86715	4.82949705951616e-06	AT1G70820	7.33724	3.30083904715404e-150
AT5G65410	6.93044	1.83509737079729e-102	AT5G65400	1.68375	3.64207860650037e-15
AT1G66020	-4.28271	6.30799180986181e-15	AT1G65730	-2.97413	9.28649100536923e-27
AT2G29760	0.611069	0.000781117234182585	AT2G29690	1.05712	1.310796696904e-07
AT5G36220	1.44412	1.89293765254528e-19	AT5G36110	-5.88774	2.25079634357272e-10
AT5G05170	-0.24413	0.0274703039420324	AT5G05160	-1.88851	2.47469178935531e-20
AT3G01900	-5.31644	9.40212091314279e-16	AT3G01820	-0.560473	3.09057894235261e-07
AT3G11390	-2.11196	7.47385255465368e-05	AT3G11385	-6.55376	6.75041685557771e-20
AT2G25170	0.509542	0.00905829422291053	AT2G25140	-0.888456	5.7815581793991e-16
AT1G32120	3.63966	3.46473626897491e-62	AT1G31950	-3.34576	2.80166578521474e-19
AT1G63770	0.256064	0.0481110763202539	AT1G63660	-0.397091	0.0469275165600994
AT4G16892	2.88438	6.73194512868525e-12	AT4G16890	2.55938	2.02741479868906e-44
AT5G13000	0.52573	0.0384692802884094	AT5G12970	-3.54154	7.74384335671615e-56
AT2G01950	-2.05454	2.63682591736927e-10	AT2G01940	2.52499	5.52099639951322e-33
AT1G63770	0.256064	0.0481110763202539	AT1G63750	2.68573	2.21561601326895e-34
AT3G02130	0.762453	0.000221726077496109	AT3G02060	1.65849	1.8566745484596e-62
AT1G06390	0.554807	6.88707206393669e-14	AT1G06270	-0.465622	0.0068579173411875
AT5G14920	3.8262	1.77788878400477e-12	AT5G14910	4.67343	7.04734367275656e-244
AT3G28080	5.74391	4.65187508414797e-38	AT3G28070	7.98238	3.07489047309714e-23
AT4G23260	4.91018	2.06858941208711e-52	AT4G23200	8.45071	1.25059370286714e-15
AT1G52040	5.1451	3.48050066143603e-117	AT1G51880	-5.75359	8.00641733934526e-38
AT1G52190	4.55008	4.22707778975889e-61	AT1G52150	-0.362029	0.026457534638292
AT1G66970	6.69999	7.76316060686033e-215	AT1G66910	5.73694	4.28099263781876e-86
AT5G57560	3.71818	1.67400337701406e-19	AT5G57530	-6.10467	3.55155422881274e-22
AT1G56520	6.81212	1.85283684800453e-72	AT1G56510	7.00144	6.28193826751109e-75
AT3G25690	4.50534	0	AT3G25680	1.08114	5.73567555886036e-22
AT1G56510	7.00144	6.28193826751109e-75	AT1G56500	4.0111	3.33265162847515e-131
AT3G62750	6.87761	0	AT3G62740	-1.56051	1.08731290154517e-05
AT1G33240	1.81053	1.36455424278055e-23	AT1G33230	-0.589757	1.31820642436593e-08
AT2G26340	2.86072	4.21935405097963e-74	AT2G26330	6.50377	0
AT1G56510	7.00144	6.28193826751109e-75	AT1G56500	4.0111	3.33265162847515e-131
AT2G29110	-2.08381	0.0123179555707828	AT2G28960	-5.37377	2.41102155837694e-45
AT3G58570	-0.418524	0.00282994026398708	AT3G58560	0.383508	9.32609277043929e-06
AT4G19420	1.93709	2.64024690677212e-08	AT4G19410	0.470756	2.83772585178351e-05
AT5G44260	4.3073	9.24610435901236e-61	AT5G44230	-0.472638	0.0137192108517314
AT4G27300	5.23805	1.80243843901158e-201	AT4G27260	1.16408	2.09446056557826e-23
AT5G43745	1.4153	4.33389493077123e-07	AT5G43700	0.911398	7.44211562530183e-21
AT3G60350	0.4828	4.73010958812252e-05	AT3G60320	1.7249	1.36760241993734e-39
AT1G01610	0.99095	0.00213160861385343	AT1G01480	-2.1863	4.56633781698046e-08
AT5G53020	0.630795	0.00128651182693541	AT5G52930	5.0374	5.66947904423758e-13
AT4G16880	7.48101	6.81002425650426e-49	AT4G16860	3.98441	5.62444500461666e-89
AT4G36280	4.79	3.41448579317136e-24	AT4G36250	2.24192	2.36375710880285e-06
AT5G22800	3.89267	1.41453653040704e-145	AT5G22780	-0.220304	0.0392847883573017
AT3G06640	2.2149	2.99425924385214e-09	AT3G06630	-2.36349	1.083283460225e-13
AT1G69550	2.52133	7.79976490954534e-30	AT1G69530	2.48854	1.39624199901048e-06
AT3G26290	1.01842	2.76338153119782e-07	AT3G26280	5.27189	7.78824237130772e-31
AT3G61480	-0.232015	0.0288086946374242	AT3G61470	6.89194	6.45497492291243e-104
AT2G23000	3.85127	3.6437889814708e-25	AT2G22990	4.3584	9.62373442943335e-23
AT4G24670	1.53356	8.07522450297386e-16	AT4G24620	-0.536178	2.0679164874982e-09
AT1G65150	0.819333	0.00387345556361415	AT1G65120	-1.17329	0.00141584743954527
AT4G29920	-0.607528	0.00400103782793584	AT4G29900	-0.581611	3.50627323486049e-18
AT4G00420	0.364304	0.00320470535861164	AT4G00380	1.99677	1.69968031178904e-19
AT5G03050	0.843813	1.31458982905817e-08	AT5G03040	0.467374	1.6100732967928e-07
AT1G75500	-0.44292	0.0342540807853703	AT1G75490	3.40687	1.17386192983072e-58
AT1G11410	2.69295	5.91415232123747e-51	AT1G11340	6.65198	1.99932333243952e-50
AT2G37170	-2.60099	1.15182065093182e-40	AT2G37150	-0.705565	2.59063145604376e-07
AT3G06780	1.48767	2.06789017838481e-11	AT3G06770	1.7527	3.03586626661738e-36
AT5G27600	-0.429751	0.00201812807847838	AT5G27550	0.680255	0.00153262500349457
AT2G29110	-2.08381	0.0123179555707828	AT2G28970	-5.31659	4.18982468697422e-130
AT1G67900	2.33608	1.4491726928303e-25	AT1G67890	0.521039	0.00208256711795187
AT1G70710	-0.700258	0.0328315938064221	AT1G70700	4.15477	2.22287635658496e-89
AT1G66980	7.38135	0	AT1G66960	-3.92277	8.31383842294798e-06
AT2G03140	0.383459	0.0159296752495828	AT2G03120	-0.741235	7.00665083483852e-16
AT4G24670	1.53356	8.07522450297386e-16	AT4G24620	-0.536178	2.0679164874982e-09
AT3G53480	-5.0051	1.32012107939761e-65	AT3G53460	2.94146	4.53971802776303e-26
AT3G06990	-2.03726	9.20980642449332e-12	AT3G06980	2.60585	4.09989101966029e-89
AT3G02060	1.65849	1.8566745484596e-62	AT3G02050	1.51286	1.03837561855577e-34
AT1G35350	2.34229	7.0147764491327e-17	AT1G35340	3.01565	1.30008137966013e-84
AT1G70710	-0.700258	0.0328315938064221	AT1G70700	4.15477	2.22287635658496e-89
AT1G70250	0.758169	0.00649796438449118	AT1G70210	0.93349	0.0374575467846942
AT1G32120	3.63966	3.46473626897491e-62	AT1G32080	7.23763	2.65338321561034e-110
AT4G17000	0.773732	0.0358202322209048	AT4G16990	7.82268	3.13637103124229e-138
AT5G48090	-2.02344	6.82063982250474e-06	AT5G48070	-5.20661	4.41913043047598e-26
AT1G73870	7.63564	1.08258065846194e-95	AT1G73860	-3.81201	1.94631516690857e-28
AT3G22790	-0.696747	2.43688945020547e-05	AT3G22760	2.82137	3.86607284495622e-43
AT2G40360	-0.726777	0.0062813855098777	AT2G40320	-2.1045	3.75970030134806e-17
AT1G51820	1.48462	3.50273617468003e-07	AT1G51805	7.1917	1.37600524771529e-223
AT5G25060	0.405162	0.00697072969015003	AT5G25040	6.82173	2.68316904898865e-56
AT3G18010	7.29581	2.27089192242883e-20	AT3G17970	0.841072	8.94531187525329e-24
AT3G06660	1.37104	1.03523069031822e-21	AT3G06630	-2.36349	1.083283460225e-13
AT5G22800	3.89267	1.41453653040704e-145	AT5G22780	-0.220304	0.0392847883573017
AT1G63750	2.68573	2.21561601326895e-34	AT1G63690	0.474601	1.51161850848892e-06
AT1G62440	-3.29872	4.93118349464032e-12	AT1G62360	6.37958	1.74971202303482e-34
AT1G63750	2.68573	2.21561601326895e-34	AT1G63700	0.430874	0.000901994317630334
AT3G24240	-5.48013	4.81136665203793e-27	AT3G24190	1.65189	6.48247558644836e-16
AT1G66970	6.69999	7.76316060686033e-215	AT1G66910	5.73694	4.28099263781876e-86
AT1G33240	1.81053	1.36455424278055e-23	AT1G33230	-0.589757	1.31820642436593e-08
AT3G53240	0.616031	5.54146930180461e-06	AT3G53230	-2.48445	4.22292225386539e-54
AT1G51580	1.00216	2.39121686016999e-10	AT1G51570	1.36181	3.26376641074326e-50
AT1G11100	-3.1086	1.87450145300632e-75	AT1G11070	-0.979147	0.00278702229066822
AT1G56510	7.00144	6.28193826751109e-75	AT1G56500	4.0111	3.33265162847515e-131
AT1G52190	4.55008	4.22707778975889e-61	AT1G52120	-5.16949	7.13393712630422e-09
AT5G52290	1.58518	9.60612806051788e-05	AT5G52230	0.456284	3.25155441070056e-05
AT4G32300	0.828702	0.0121342890309324	AT4G32250	0.802236	5.25469649905743e-06
AT4G16900	1.16585	7.73801154939317e-22	AT4G16890	2.55938	2.02741479868906e-44
AT1G11100	-3.1086	1.87450145300632e-75	AT1G11070	-0.979147	0.00278702229066822
AT3G52190	-0.757031	5.00566724546967e-07	AT3G52180	3.15425	2.95856298246463e-85
AT1G56520	6.81212	1.85283684800453e-72	AT1G56510	7.00144	6.28193826751109e-75
AT1G12100	1.98068	0.0117094661603506	AT1G12040	-5.94267	8.40601885922316e-54
AT4G11670	-0.462391	0.000578035696335415	AT4G11610	-5.61028	1.96617018918136e-19
AT1G03060	-0.531658	0.00200253536972067	AT1G03000	0.769634	1.4821673990774e-14
AT4G16892	2.88438	6.73194512868525e-12	AT4G16880	7.48101	6.81002425650426e-49
AT4G17010	-0.336807	0.021187122889997	AT4G16990	7.82268	3.13637103124229e-138
AT1G29430	6.46144	4.69543037457803e-38	AT1G29390	2.62238	2.52694910089631e-32
AT3G55160	-0.555484	0.0488099497378342	AT3G55130	5.86438	7.5614483398405e-129
AT1G63440	-3.08086	2.57931379491646e-63	AT1G63360	6.1313	8.89591949188856e-119
AT1G32170	-1.95864	6.34810837840481e-06	AT1G32150	0.489402	0.0209857670008802
AT5G44750	0.20249	0.0474586859083171	AT5G44700	-3.35799	5.24092082899956e-26
AT2G36780	4.16888	6.8181541951568e-15	AT2G36710	-2.35252	1.90088116245963e-05
AT2G32870	8.4884	2.65906765134821e-123	AT2G32800	1.71381	1.13900058497971e-12
AT3G08505	1.0038	3.41133001931951e-07	AT3G07990	-0.872063	4.60767930101342e-12
AT5G02880	-0.535391	0.00192692593564208	AT5G02830	3.14149	1.12002406293175e-31
AT3G02060	1.65849	1.8566745484596e-62	AT3G02020	1.94387	6.10311257123745e-05
AT1G56520	6.81212	1.85283684800453e-72	AT1G56510	7.00144	6.28193826751109e-75
AT3G29320	2.9231	5.70352986235122e-52	AT3G29310	-0.550188	1.02771149541525e-06
AT2G37940	-0.307796	0.00543440075065133	AT2G37930	0.617058	4.17078777234754e-05
AT5G04140	7.40463	1.23797485802098e-227	AT5G04130	0.712871	0.000167482205947915
AT4G32990	6.48838	1.10985748838684e-18	AT4G32980	6.9929	1.24621049970409e-113
AT4G04960	-1.74128	6.23368067899316e-05	AT4G04955	-1.22855	6.60024470970854e-11
AT4G16960	-1.53638	0.000183322470094043	AT4G16950	2.61975	7.22284784353196e-50
AT4G39960	1.75784	3.69361336351557e-40	AT4G39950	-2.21337	1.09048411276042e-15
AT5G40390	-1.1209	2.81076393547227e-13	AT5G40380	6.954	5.24742967861004e-78
AT2G37090	-2.21963	3.80351312361147e-11	AT2G37050	-0.723304	4.42731371934023e-06
AT2G30020	1.1557	0.023155252471405	AT2G30010	3.93213	1.86880924722991e-162
AT1G51820	1.48462	3.50273617468003e-07	AT1G51805	7.1917	1.37600524771529e-223
AT5G12290	-0.488363	4.53506404809942e-06	AT5G12280	-2.69259	2.13050769814757e-09
AT5G24270	-2.22122	7.40949575887603e-11	AT5G24210	7.03964	1.30803500995815e-81
AT4G11290	-3.0148	2.08593932743323e-25	AT4G11270	-0.246232	0.0239984798027918
AT4G33520	1.52646	6.96908326177227e-25	AT4G33480	1.77732	1.55741115242606e-49
AT4G29780	1.53551	8.63596924630094e-05	AT4G29735	-0.572005	9.03291842239289e-05
AT5G17510	0.474543	0.026347093244521	AT5G17450	1.19437	0.0023106767736113
AT3G49310	-0.506882	2.85862865182966e-08	AT3G49260	8.03794	1.08164056107214e-69
AT1G18700	0.316851	0.00123401318397213	AT1G18660	1.16778	2.31516184067938e-10
AT1G51880	-5.75359	8.00641733934526e-38	AT1G51790	-1.88893	9.2340838968072e-06
AT3G47400	-2.30949	3.45044041557041e-31	AT3G47340	5.50478	1.69868612510841e-09
AT1G03160	2.37637	2.52894816312805e-63	AT1G03080	-1.12717	3.01299459744814e-09
AT2G29120	3.11009	8.84571001744571e-10	AT2G28970	-5.31659	4.18982468697422e-130
AT5G06740	-5.21082	1.40661301384844e-28	AT5G06640	-5.57918	6.7606453549426e-40
AT5G20280	0.98447	1.30188594802346e-18	AT5G20250	1.47007	0.000128440411041474
AT2G42540	6.96599	8.21759640528002e-35	AT2G42520	0.23798	0.0189078102790526
AT2G29110	-2.08381	0.0123179555707828	AT2G29090	5.60489	3.66061741036352e-23
AT1G09930	-3.24334	0.000662543924739576	AT1G09880	-1.21453	0.00565386755568405
AT1G67500	-1.03578	5.81599355284701e-06	AT1G67460	0.867474	0.0300367359667032
AT3G01750	0.938833	3.03999459643706e-11	AT3G01670	0.592721	0.0082067946495729
AT1G21250	4.1292	0.00267596517479947	AT1G21210	-2.57465	1.88572950775891e-06
AT2G29680	0.75464	0.0150061184921884	AT2G29670	5.03881	9.41713087699423e-104
AT4G16890	2.55938	2.02741479868906e-44	AT4G16860	3.98441	5.62444500461666e-89
AT5G45200	-5.13828	2.58913987951404e-15	AT5G45150	0.959186	0.00604857026063387
AT5G54040	-4.83936	7.57037721911891e-16	AT5G54020	-4.88759	4.8366299666038e-19
AT2G23430	0.88676	2.56458593868605e-05	AT2G23410	-6.36368	5.41646938111326e-19
AT1G23090	4.26765	9.09013521915651e-41	AT1G23080	2.01809	6.48920664249694e-69
AT5G49990	-0.568401	0.0469486917093269	AT5G49970	1.18166	1.52892495136793e-21
AT4G28270	0.384114	0.00993814743157441	AT4G28240	0.362723	0.0293219417815587
AT4G32390	-0.610526	0.0331233556846323	AT4G32350	0.418908	0.0101094156876388
AT1G67740	7.11907	1.50821971762321e-195	AT1G67710	-3.18011	4.33008713625758e-27
AT1G77660	-0.645079	0.000129321744416166	AT1G77630	1.49864	4.55090853827142e-27
AT5G12980	0.495514	0.00264275280123503	AT5G12970	-3.54154	7.74384335671615e-56
AT1G63700	0.430874	0.000901994317630334	AT1G63660	-0.397091	0.0469275165600994
AT4G33540	0.984381	6.68940803551531e-09	AT4G33480	1.77732	1.55741115242606e-49
AT2G27060	1.19266	1.32072590591228e-07	AT2G27050	1.20123	9.21855606369793e-26
AT4G27300	5.23805	1.80243843901158e-201	AT4G27260	1.16408	2.09446056557826e-23
AT2G16920	-0.470267	1.23600530955677e-08	AT2G16870	-1.49655	2.33277698416074e-16
AT5G05980	-0.490109	0.000154004756653374	AT5G05930	1.08692	1.99985834648421e-15
AT4G28085	-0.888771	0.000326878814859991	AT4G28080	5.5523	2.59562893815667e-187
AT1G42550	5.03116	7.25482905957067e-223	AT1G42540	1.05705	3.11875364091459e-22
AT5G45530	5.01884	1.60326483562649e-14	AT5G45520	4.72077	1.58830379545489e-26
AT3G59770	-0.46592	1.14847805785887e-10	AT3G59700	-2.04227	7.62346965342177e-07
AT2G25170	0.509542	0.00905829422291053	AT2G25130	-1.5474	0.00022631806628964
AT1G52110	-4.99308	5.83265146010197e-08	AT1G51880	-5.75359	8.00641733934526e-38
AT2G23630	-5.60009	1.10651418436313e-14	AT2G23610	-0.379006	0.000865226109155758
AT3G10360	0.539767	0.00129771611259166	AT3G10340	-2.1773	1.08292585215227e-07
AT3G06770	1.7527	3.03586626661738e-36	AT3G06760	0.869192	3.39603870624934e-08
AT4G01460	5.94658	1.49379343563303e-76	AT4G01450	-2.33448	2.89072430883101e-30
AT3G56010	3.42527	8.02659145009105e-56	AT3G55980	1.67518	6.84694432294927e-08
AT2G17780	5.62493	2.78883475964231e-86	AT2G17730	0.693233	0.00537183618556989
AT1G51850	-2.49075	7.10242737769867e-09	AT1G51805	7.1917	1.37600524771529e-223
AT3G50010	-2.78098	2.51749028547261e-11	AT3G49900	2.70998	9.43001966627497e-16
AT1G43670	3.33586	2.9573872469204e-64	AT1G43620	0.539885	5.45648126625006e-05
AT1G08560	0.801212	3.71099950693455e-06	AT1G08510	0.410402	1.85157064356082e-06
AT5G06700	1.50031	5.72410273117405e-18	AT5G06670	1.36366	1.3797081618539e-28
AT4G38950	1.40581	0.00148519016281298	AT4G38860	5.49422	1.66160889311186e-20
AT1G51890	-2.8958	4.27073054283895e-14	AT1G51800	-1.22176	0.000697390718735551
AT1G61500	1.16092	1.60592835920415e-10	AT1G61490	-0.578744	0.0422435758898071
AT4G16892	2.88438	6.73194512868525e-12	AT4G16890	2.55938	2.02741479868906e-44
AT2G45850	4.57788	4.19035484863228e-232	AT2G45830	-2.12778	1.00451510162087e-27
AT5G43500	0.530152	0.00021164476164748	AT5G43470	4.36539	5.9774815490012e-254
AT1G56520	6.81212	1.85283684800453e-72	AT1G56500	4.0111	3.33265162847515e-131
AT5G10150	5.63001	2.13226516506953e-147	AT5G10110	0.365913	0.00885849755448707
AT3G57170	0.408483	7.96892932762202e-05	AT3G57130	3.03883	2.19546632024547e-10
AT3G46200	-0.506494	0.0207436117194345	AT3G46130	-2.539	7.31755056370195e-43
AT4G31650	1.21901	1.54273012440791e-08	AT4G31570	-0.458193	0.00163032084316191
AT2G14100	-5.36289	2.21524302186654e-31	AT2G14080	4.35706	6.58755995903743e-183
AT2G41720	2.32813	3.8554343361302e-78	AT2G41700	-0.20774	0.00727362348910528
AT1G71420	0.698191	0.0184410824506468	AT1G71380	-4.09069	1.37245172077191e-26
AT5G50950	6.1271	1.40186331499601e-79	AT5G50940	1.16245	0.000401902225450875
AT3G14570	-1.40591	1.01429426335341e-06	AT3G14550	-0.972949	8.65833565821359e-05
AT2G29110	-2.08381	0.0123179555707828	AT2G28990	-5.99013	2.00176333203294e-41
AT1G64710	5.06858	7.67517054352852e-66	AT1G64700	-0.814391	0.0279957786166069
AT5G53880	3.00036	2.89935919133197e-34	AT5G53860	1.8286	1.73075062593389e-53
AT5G40390	-1.1209	2.81076393547227e-13	AT5G40380	6.954	5.24742967861004e-78
AT5G03830	0.921669	2.67593430806335e-07	AT5G03795	-1.33921	0.00135300769634796
AT1G56510	7.00144	6.28193826751109e-75	AT1G56500	4.0111	3.33265162847515e-131
AT1G20200	-0.252284	0.00221682918570289	AT1G20190	0.830434	3.90391637044957e-05
AT2G32530	4.52586	1.33096331551956e-66	AT2G32520	-0.666596	2.19247770986155e-06
AT4G16920	-2.32573	3.066915643526e-14	AT4G16900	1.16585	7.73801154939317e-22
AT1G58602	6.48534	3.72491263006463e-200	AT1G58520	0.9433	0.00984720967903111
AT2G42570	-2.47916	9.57893368774146e-72	AT2G42520	0.23798	0.0189078102790526
AT4G36890	-0.823276	0.000216407279102023	AT4G36870	3.88858	2.36134279072347e-17
AT1G68570	2.6459	6.93908804393263e-18	AT1G68530	5.52404	1.20386303610506e-48
AT3G53990	-0.703926	1.27365192494903e-11	AT3G53960	2.01711	4.1846863147239e-09
AT1G70310	0.179413	0.0189073543453717	AT1G70290	0.906768	2.16781578777228e-07
AT1G51870	-4.99841	6.17323042450743e-13	AT1G51800	-1.22176	0.000697390718735551
AT2G41720	2.32813	3.8554343361302e-78	AT2G41700	-0.20774	0.00727362348910528
AT3G62750	6.87761	0	AT3G62700	0.666003	6.68589162291557e-09
AT1G51840	-4.47906	4.10692876154488e-81	AT1G51800	-1.22176	0.000697390718735551
AT5G27600	-0.429751	0.00201812807847838	AT5G27490	-0.449373	0.020398578749004
AT1G18700	0.316851	0.00123401318397213	AT1G18660	1.16778	2.31516184067938e-10
AT5G61670	1.46539	1.09437960050878e-17	AT5G61560	2.43365	4.35263534025489e-33
AT1G23190	-0.479034	1.70778475880187e-06	AT1G23080	2.01809	6.48920664249694e-69
AT4G20070	1.4381	3.10905575874017e-21	AT4G19980	-4.87941	3.69385192480362e-13
AT4G15660	6.15565	4.58938872696435e-30	AT4G15350	-5.64438	5.00071758949592e-11
AT3G45850	1.06141	7.66630997304369e-07	AT3G45750	0.623632	7.05845584704315e-07
AT4G16900	1.16585	7.73801154939317e-22	AT4G16880	7.48101	6.81002425650426e-49
AT3G06650	0.896053	1.48485929628757e-13	AT3G06640	2.2149	2.99425924385214e-09
AT5G46490	4.23768	5.82437180675689e-44	AT5G46470	0.726949	0.00168750164222977
AT1G65900	1.19134	8.44702868720057e-08	AT1G65850	-3.47514	2.95833870147107e-08
AT3G09550	1.58037	5.89732244957519e-08	AT3G09440	-0.657317	2.25775032755383e-08
AT5G49890	-0.657928	0.000668375475861832	AT5G49870	-4.1275	6.03217191231172e-10
AT1G70920	-2.27898	9.03840818231783e-10	AT1G70830	2.86715	4.82949705951616e-06
AT2G26340	2.86072	4.21935405097963e-74	AT2G26330	6.50377	0
AT5G59080	2.52157	1.27161978537156e-26	AT5G59030	3.85757	1.29340007416279e-132
AT1G58602	6.48534	3.72491263006463e-200	AT1G58520	0.9433	0.00984720967903111
AT2G14100	-5.36289	2.21524302186654e-31	AT2G14080	4.35706	6.58755995903743e-183
AT5G62030	0.770847	1.6676991331339e-11	AT5G62000	0.706843	1.44996545250223e-12
AT5G62230	6.04763	9.67841458169798e-40	AT5G62200	-0.541641	0.0222357052880619
AT2G14860	0.741599	0.000868454708208177	AT2G14835	-0.344556	8.19937668263784e-05
AT1G33270	0.607031	0.000824198135815379	AT1G33240	1.81053	1.36455424278055e-23
AT1G65730	-2.97413	9.28649100536923e-27	AT1G65620	2.9509	3.05732143696332e-16
AT3G51470	0.8766	7.10459757782366e-07	AT3G51420	5.33377	3.96297448744078e-227
AT4G19560	1.45137	1.93900750115704e-06	AT4G19520	3.09599	1.18530466429375e-17
AT4G23820	4.01275	1.03440822678515e-44	AT4G23760	-0.293392	0.0156751033462411
AT1G23080	2.01809	6.48920664249694e-69	AT1G23020	0.759629	7.73220675081031e-07
AT2G32620	-6.08963	3.04853691333378e-17	AT2G32560	1.0141	0.000133630966055066
AT1G58025	0.579282	0.00543311573925698	AT1G57820	0.506588	0.0112752384479562
AT1G33811	8.12702	6.44326311291413e-42	AT1G33750	-5.24696	1.27185664506085e-11
AT1G77680	-0.480897	0.00504694621635381	AT1G77660	-0.645079	0.000129321744416166
AT1G71420	0.698191	0.0184410824506468	AT1G71410	-0.340964	0.0466744063669529
AT3G47760	-5.23565	3.72936009656541e-08	AT3G47740	-5.63629	6.10719748128447e-13
AT1G49980	0.364787	0.0229976188228496	AT1G49970	2.62727	1.02330365089997e-136
AT5G18930	0.863454	4.63732816670572e-05	AT5G18910	-4.19181	6.03444005998745e-13
AT1G63770	0.256064	0.0481110763202539	AT1G63750	2.68573	2.21561601326895e-34
AT1G67900	2.33608	1.4491726928303e-25	AT1G67890	0.521039	0.00208256711795187
AT1G63750	2.68573	2.21561601326895e-34	AT1G63700	0.430874	0.000901994317630334
AT1G26160	0.936291	1.83084516717991e-24	AT1G26150	3.09914	4.22089006927258e-27
AT4G32250	0.802236	5.25469649905743e-06	AT4G32160	-0.354479	0.00264639100116278
AT3G09840	-0.325788	0.00149175439187386	AT3G09790	-0.90488	0.00410966311781297
AT5G20090	-0.747845	4.80571543064809e-06	AT5G20070	0.685646	0.00726402583592967
AT3G51150	2.13937	3.85562573110511e-06	AT3G51140	2.15931	1.34785931213947e-74
AT1G51805	7.1917	1.37600524771529e-223	AT1G51790	-1.88893	9.2340838968072e-06
AT5G66390	-4.73155	5.72817489956848e-26	AT5G66300	-0.908629	1.00064727319999e-05
AT1G77280	-1.39161	2.17096171452812e-16	AT1G77250	0.604265	0.0305952836192038
AT2G29120	3.11009	8.84571001744571e-10	AT2G29090	5.60489	3.66061741036352e-23
AT4G15530	2.46844	2.06049950208947e-24	AT4G15490	6.76962	9.96642472256031e-49
AT4G24480	-1.64329	2.48363006174382e-12	AT4G24450	2.42363	3.29259130209588e-26
AT3G14540	-2.34606	5.62701935119448e-09	AT3G14470	-1.45157	3.44124558141978e-12
AT1G09300	-0.577907	0.000103517726507338	AT1G09270	-0.55336	2.78105827889054e-05
AT4G02710	-1.90022	8.09204782836348e-13	AT4G02660	-1.45544	0.00144841635090342
AT3G28380	-4.01959	2.33581871986706e-09	AT3G28345	-4.4939	2.63490475567073e-141
AT1G47580	2.89665	6.83263109347817e-71	AT1G47570	-0.66885	3.88035586767445e-08
AT3G14550	-0.972949	8.65833565821359e-05	AT3G14470	-1.45157	3.44124558141978e-12
AT4G11670	-0.462391	0.000578035696335415	AT4G11610	-5.61028	1.96617018918136e-19
AT1G05530	-4.88072	1.21111799073048e-30	AT1G05490	0.702647	0.0496119892926467
AT1G02650	4.04193	1.57370721369325e-20	AT1G02630	2.79735	2.71793478782821e-05
AT1G63770	0.256064	0.0481110763202539	AT1G63710	3.85298	2.35225552035618e-06
AT4G25290	3.59277	1.12566730479729e-25	AT4G25240	-1.54298	5.83212404763853e-12
AT1G52080	-1.00311	4.85257242766592e-17	AT1G52070	-5.26387	1.55271875687272e-08
AT2G26980	1.21271	0.000107700310386799	AT2G26970	0.361682	0.00179867652083209
AT1G05030	1.24399	1.84378792935245e-22	AT1G05010	2.45347	2.87914354149867e-22
AT5G18370	-1.51303	4.00344034697295e-23	AT5G18360	-1.15391	6.20833154414671e-09
AT4G15530	2.46844	2.06049950208947e-24	AT4G15490	6.76962	9.96642472256031e-49
AT5G16150	1.90836	3.34059837493866e-140	AT5G16110	-0.984642	0.00612975390925045
AT5G22780	-0.220304	0.0392847883573017	AT5G22770	-0.307172	0.000562850769522665
AT5G13000	0.52573	0.0384692802884094	AT5G12950	1.7473	9.25641672912741e-42
AT1G66980	7.38135	0	AT1G66950	-5.02397	7.42142954142439e-14
AT5G44900	-5.182	9.05455577370574e-28	AT5G44870	2.20358	3.54236705501637e-34
AT5G51490	-6.66429	1.76985233239162e-23	AT5G51460	1.05811	3.60813573207475e-06
AT4G37760	2.99995	4.33931710625505e-40	AT4G37750	1.36047	3.53936575454488e-10
AT4G16960	-1.53638	0.000183322470094043	AT4G16950	2.61975	7.22284784353196e-50
AT1G79050	1.18083	6.64948018173985e-26	AT1G79030	-0.844067	3.18466809882705e-14
AT1G02660	4.22113	1.31564661121782e-67	AT1G02650	4.04193	1.57370721369325e-20
AT4G24670	1.53356	8.07522450297386e-16	AT4G24660	4.22583	9.38124723983767e-61
AT2G26200	0.44214	1.8350859370646e-05	AT2G26190	0.766566	0.00144838917280388
AT5G26742	2.68599	3.09382363620792e-107	AT5G26570	1.72342	3.30117806669103e-59
AT1G78320	-2.40606	2.19730919468348e-11	AT1G78290	-3.34908	9.20557389807199e-25
AT3G01380	-0.312236	0.00517534281199406	AT3G01370	2.78164	7.37391995572447e-44
AT3G18230	-0.687127	8.05127322806275e-08	AT3G18190	-0.524571	3.25900926035305e-06
AT4G01460	5.94658	1.49379343563303e-76	AT4G01440	-2.39501	1.07410619176218e-50
AT5G46510	0.703522	0.0235165605123907	AT5G46470	0.726949	0.00168750164222977
AT1G56150	6.23509	8.64783769830871e-22	AT1G56140	-1.6764	5.69278319660604e-38
AT5G13690	1.15999	1.26979391440218e-16	AT5G13650	2.21386	1.34727144043564e-58
AT4G16900	1.16585	7.73801154939317e-22	AT4G16860	3.98441	5.62444500461666e-89
AT5G17050	0.691399	0.000785803033166186	AT5G16960	3.41598	0.000890726503578222
AT5G38460	-0.401609	0.000130685779683701	AT5G38410	7.83776	1.68463897626054e-161
AT1G47603	-3.92928	4.46669837208827e-07	AT1G47570	-0.66885	3.88035586767445e-08
AT3G46480	-3.34622	7.21143992850943e-14	AT3G46370	5.91371	1.91642207923984e-21
AT4G33565	-1.04037	1.56894075583845e-11	AT4G33520	1.52646	6.96908326177227e-25
AT3G26320	4.75037	5.05167351236986e-24	AT3G26230	1.46631	0.0424420437897004
AT2G19170	0.589019	0.0207465782285797	AT2G19110	-2.12686	3.3229148573494e-66
AT3G47000	0.423868	2.08464955472606e-07	AT3G46970	2.87743	7.33551196859014e-43
AT3G06640	2.2149	2.99425924385214e-09	AT3G06620	-0.383701	0.00341491988438439
AT3G55250	3.65713	4.02656535860442e-163	AT3G55130	5.86438	7.5614483398405e-129
AT1G44760	1.98463	2.93425340226951e-32	AT1G44750	-0.456218	0.00947658890033456
AT2G43330	1.5441	1.07948742077895e-26	AT2G43260	0.285648	0.03472272243726
AT2G44490	0.9889	7.0566891818856e-10	AT2G44480	-3.27186	5.06428347264579e-35
AT2G14080	4.35706	6.58755995903743e-183	AT2G14050	0.548551	0.000711712692207387
AT4G18710	0.565817	0.0125205137402594	AT4G18700	0.478711	0.048164087467214
AT1G21610	0.438538	0.0139386106415371	AT1G21590	1.08199	9.44998224419705e-07
AT5G44770	-5.20374	2.01431994183917e-11	AT5G44700	-3.35799	5.24092082899956e-26
AT5G37450	-1.38103	0.0014058362812364	AT5G37400	1.15701	4.42074916190222e-05
AT4G33880	-6.09939	2.75733247639472e-47	AT4G33810	-0.424439	0.0077331930417296
AT4G16900	1.16585	7.73801154939317e-22	AT4G16890	2.55938	2.02741479868906e-44
AT1G72470	-1.29797	2.48635940695052e-16	AT1G72450	1.02526	0.0031379922353848
AT1G56510	7.00144	6.28193826751109e-75	AT1G56500	4.0111	3.33265162847515e-131
AT5G50175	-4.4619	2.02793339122514e-15	AT5G50160	6.59886	2.34793729988131e-65
AT4G16890	2.55938	2.02741479868906e-44	AT4G16880	7.48101	6.81002425650426e-49
AT4G19520	3.09599	1.18530466429375e-17	AT4G19500	1.48346	1.57893516643006e-31
AT4G32250	0.802236	5.25469649905743e-06	AT4G32190	2.3865	8.41550932536161e-36
AT3G14810	1.69819	3.02762312348935e-08	AT3G14770	1.22099	0.0115948914478219
AT1G79060	0.379746	0.0102955519699477	AT1G79030	-0.844067	3.18466809882705e-14
AT1G73010	-0.789413	0.0322451657701356	AT1G72970	2.76905	5.36045533765984e-27
AT4G20050	-0.93369	0.0201718439446555	AT4G19985	3.23768	1.15541452802095e-38
AT1G31440	0.506738	2.0269013462074e-07	AT1G31420	1.0621	1.84717905328579e-17
AT4G33000	4.05383	6.52191800702759e-101	AT4G32980	6.9929	1.24621049970409e-113
AT5G18700	0.988833	0.000141041846594824	AT5G18670	1.49738	2.94273732123254e-33
AT5G05965	2.26214	5.10642655616991e-10	AT5G05930	1.08692	1.99985834648421e-15
AT4G01250	3.15552	8.54316880986116e-33	AT4G01240	-5.52331	1.15712649317767e-30
AT3G46370	5.91371	1.91642207923984e-21	AT3G46330	-6.21046	3.45338698747857e-31
AT4G27730	0.771815	1.26407834201209e-05	AT4G27710	1.16722	2.67856372856845e-17
AT1G66980	7.38135	0	AT1G66970	6.69999	7.76316060686033e-215
AT2G29200	-0.965202	1.09116156298038e-06	AT2G29110	-2.08381	0.0123179555707828
AT3G27170	-0.628244	0.00026299694974631	AT3G27160	4.74175	0
AT4G11670	-0.462391	0.000578035696335415	AT4G11610	-5.61028	1.96617018918136e-19
AT3G17130	2.61235	3.49818373550096e-07	AT3G17100	1.39685	1.58711796756054e-13
AT2G15790	-0.661341	0.00269540473106858	AT2G15760	-1.38441	0.00682445357234255
AT5G37340	0.789982	3.99448331471787e-06	AT5G37300	2.54482	0.0099224325822217
AT1G14620	-0.837903	1.29408920582584e-11	AT1G14590	0.853156	2.82970248824293e-08
AT5G04220	1.24991	7.51143612184431e-06	AT5G04140	7.40463	1.23797485802098e-227
AT1G55260	3.83115	1.76985233239162e-23	AT1G55200	1.99603	2.32201414589126e-05
AT1G67750	-1.0531	6.64883961661695e-05	AT1G67690	0.495067	0.00335934046323192
AT3G13065	2.20878	1.562521986471e-10	AT3G13030	0.456187	0.00231015703499539
AT3G13090	-1.57465	0.000114682682392851	AT3G13065	2.20878	1.562521986471e-10
AT5G43100	-0.729697	8.94424403067994e-07	AT5G43030	-4.7124	1.98550882829519e-34
AT1G02280	2.14279	1.64260645426336e-32	AT1G02205	4.55936	5.78351815158699e-28
AT5G27380	0.681583	1.35404843010746e-09	AT5G27270	0.732346	1.00205881905164e-09
AT2G20390	-0.424918	0.011303847937302	AT2G20320	-1.32309	7.11101545248526e-38
AT1G50040	1.49325	0.0237521285391637	AT1G49970	2.62727	1.02330365089997e-136
AT1G10050	-1.71792	6.279419636184e-31	AT1G09930	-3.24334	0.000662543924739576
AT3G55160	-0.555484	0.0488099497378342	AT3G55130	5.86438	7.5614483398405e-129
AT1G66980	7.38135	0	AT1G66960	-3.92277	8.31383842294798e-06
AT1G65730	-2.97413	9.28649100536923e-27	AT1G65660	0.661344	2.52718171461493e-08
AT1G73170	1.65866	5.34520355027596e-22	AT1G73130	-1.18079	8.34415727925981e-09
AT4G32980	6.9929	1.24621049970409e-113	AT4G32970	0.643238	0.0325318971225514
AT5G22355	-4.84654	4.42054091220483e-26	AT5G22300	2.25654	4.54898515693054e-06
AT4G16890	2.55938	2.02741479868906e-44	AT4G16860	3.98441	5.62444500461666e-89
AT1G09930	-3.24334	0.000662543924739576	AT1G09910	0.411279	9.98878235587565e-06
AT4G23820	4.01275	1.03440822678515e-44	AT4G23770	4.79235	4.00670195943098e-36
AT1G69710	-1.3754	0.0166193757022763	AT1G69690	2.4756	4.15266228723442e-11
AT1G10020	1.57331	3.27200667717351e-07	AT1G09930	-3.24334	0.000662543924739576
AT1G15490	-0.73782	1.11724592165418e-14	AT1G15460	-5.22693	5.6601037163429e-22
AT4G04920	-0.657397	2.9838677288452e-12	AT4G04910	-0.577601	4.97832866191823e-09
AT2G38695	1.45521	6.36181432191959e-19	AT2G38670	0.423322	0.00562999153145198
AT3G01100	-0.817856	1.90806413818805e-09	AT3G01070	-3.44923	5.79780842022492e-16
AT5G20280	0.98447	1.30188594802346e-18	AT5G20220	2.90305	2.08045361629059e-37
AT3G62730	-2.93643	1.43808732039627e-06	AT3G62700	0.666003	6.68589162291557e-09
AT5G12400	-0.525431	3.52911234887999e-08	AT5G12370	0.480932	2.20074806251269e-06
AT1G68600	5.5984	9.72967449435932e-51	AT1G68580	0.371677	0.000372875290674022
AT2G47230	1.30184	0.000224933651120651	AT2G47210	0.453048	3.84623870702808e-08
AT3G25690	4.50534	0	AT3G25680	1.08114	5.73567555886036e-22
AT3G18980	1.44324	1.34731996546789e-11	AT3G18930	0.688136	0.0145973044063898
AT1G61190	5.31248	0	AT1G61140	-0.696563	1.64313013354489e-05
AT1G25280	-0.481043	0.000346964420273692	AT1G25275	2.08691	2.92187229305034e-56
AT5G13680	-0.287357	0.0126928024427956	AT5G13630	6.54019	5.54735578899884e-181
AT3G48310	9.15888	2.91192112995899e-53	AT3G48260	-1.57629	1.85857231501173e-07
AT1G09240	6.94794	8.81099451423316e-24	AT1G09170	-2.92254	1.65511213746981e-09
AT1G16150	-2.3512	2.91053217266538e-08	AT1G16110	1.07539	0.000129305011370724
AT1G62030	3.83014	6.60645003715877e-26	AT1G62020	-0.518815	1.25755673613423e-10
AT5G27380	0.681583	1.35404843010746e-09	AT5G27360	4.12782	5.69278319660604e-38
AT5G51490	-6.66429	1.76985233239162e-23	AT5G51460	1.05811	3.60813573207475e-06
AT1G30330	0.640475	1.36608100803189e-05	AT1G30320	0.748866	1.52455045245531e-07
AT4G23460	-0.258138	0.0173832009782707	AT4G23430	-0.969221	0.00220348796512555
AT2G01970	-0.490886	1.32641003126684e-10	AT2G01940	2.52499	5.52099639951322e-33
AT1G63770	0.256064	0.0481110763202539	AT1G63730	-1.29164	2.68921799870403e-22
AT3G46110	2.31946	1.07340498817696e-19	AT3G46060	-0.623174	1.14387319756794e-07
AT3G45780	3.65161	3.97778233422675e-123	AT3G45750	0.623632	7.05845584704315e-07
AT1G56510	7.00144	6.28193826751109e-75	AT1G56500	4.0111	3.33265162847515e-131
AT1G56520	6.81212	1.85283684800453e-72	AT1G56510	7.00144	6.28193826751109e-75
AT4G29780	1.53551	8.63596924630094e-05	AT4G29750	1.82844	1.69953233665432e-53
AT2G29110	-2.08381	0.0123179555707828	AT2G28970	-5.31659	4.18982468697422e-130
AT5G53760	-1.10126	0.00247853433120843	AT5G53660	6.02308	1.42447830296929e-09
AT5G11010	0.238194	0.0288920183819075	AT5G10980	-0.418099	0.00238731247886676
AT4G16900	1.16585	7.73801154939317e-22	AT4G16860	3.98441	5.62444500461666e-89
AT4G34220	4.19873	3.41110064688504e-100	AT4G34200	-1.02603	5.02661804720429e-09
AT4G36890	-0.823276	0.000216407279102023	AT4G36870	3.88858	2.36134279072347e-17
AT5G37360	4.26999	1.42090056231215e-133	AT5G37340	0.789982	3.99448331471787e-06
AT3G62660	0.791162	0.00223931436977202	AT3G62630	1.47807	1.59575123112932e-11
AT4G33330	-2.48724	5.25679695764001e-12	AT4G33270	0.995384	0.0017977692054308
AT4G16990	7.82268	3.13637103124229e-138	AT4G16950	2.61975	7.22284784353196e-50
AT5G19770	0.58756	0.0164107870180413	AT5G19740	-1.62873	1.07417375021701e-51
AT1G07430	2.36952	0.00256879819680021	AT1G07390	1.45698	4.45880399911328e-11
AT1G03090	1.04789	0.000312712631433498	AT1G03060	-0.531658	0.00200253536972067
AT5G41740	2.91531	3.17850605870041e-48	AT5G41670	-0.957394	1.26745289053322e-05
AT5G63220	-0.246704	0.00995206148043741	AT5G63180	6.96609	1.43334934643919e-239
AT4G26770	-4.61832	7.18341510176101e-16	AT4G26700	3.57508	2.00613259488823e-31
AT5G24390	-2.30688	1.25030128402338e-33	AT5G24350	-0.412952	0.0143558237320144
AT1G66980	7.38135	0	AT1G66920	4.75331	9.20572111395409e-46
AT1G66910	5.73694	4.28099263781876e-86	AT1G66840	4.34791	5.95688477618579e-71
AT1G65150	0.819333	0.00387345556361415	AT1G65060	2.36547	4.90207870025058e-14
AT1G64740	1.05015	0.000137205001050461	AT1G64650	-0.484874	0.000764505935040988
AT1G02640	0.530188	0.00236201491683986	AT1G02630	2.79735	2.71793478782821e-05
AT1G24340	0.359846	0.0110818852321153	AT1G24320	-5.80042	1.71926741900009e-34
AT5G45830	6.29439	2.40906965770603e-59	AT5G45810	-2.81464	2.65907637762364e-06
AT3G10420	2.34309	6.79219784901263e-32	AT3G10360	0.539767	0.00129771611259166
AT5G11230	-3.47622	2.59521283015197e-75	AT5G11190	6.19349	1.13564301034683e-13
AT2G21840	-4.9492	6.84443166327618e-73	AT2G21770	2.53483	2.76957978424675e-07
AT2G25170	0.509542	0.00905829422291053	AT2G25130	-1.5474	0.00022631806628964
AT3G55410	-0.557267	1.59409648174245e-07	AT3G55370	-1.84806	1.65033971074049e-13
AT3G12280	0.567311	1.84001532295447e-05	AT3G12240	-5.52145	1.72861517687458e-21
AT2G29650	5.05488	4.10718409300393e-138	AT2G29630	3.53512	3.93327578176328e-100
AT5G12370	0.480932	2.20074806251269e-06	AT5G12290	-0.488363	4.53506404809942e-06
AT3G47770	-4.89837	6.97538308638675e-07	AT3G47700	-0.48506	0.000406349121079177
AT2G17070	-4.88323	1.07405052041308e-12	AT2G17050	-3.20113	7.70293225548829e-19
AT1G75180	1.83352	1.74429948097138e-72	AT1G75160	-3.40784	0.000344258193231192
AT1G25440	5.35824	5.15291051260937e-100	AT1G25425	3.35654	3.05526939718009e-36
AT5G46490	4.23768	5.82437180675689e-44	AT5G46470	0.726949	0.00168750164222977
AT1G09530	3.53192	1.98167959223334e-29	AT1G09520	0.383578	0.00904692668265399
AT4G04870	-0.367807	0.0295481583482395	AT4G04860	-0.785829	1.80873621330016e-05
AT5G46490	4.23768	5.82437180675689e-44	AT5G46470	0.726949	0.00168750164222977
AT4G28760	1.37331	2.15720315102243e-33	AT4G28730	1.76609	4.08848384258024e-36
AT5G10980	-0.418099	0.00238731247886676	AT5G10960	-0.613289	0.0395703499109788
AT5G43310	0.770696	0.000300566112449552	AT5G43270	1.3807	6.03500575113573e-23
AT4G16920	-2.32573	3.066915643526e-14	AT4G16892	2.88438	6.73194512868525e-12
AT2G25170	0.509542	0.00905829422291053	AT2G25140	-0.888456	5.7815581793991e-16
AT1G14460	0.823663	0.00326889877888627	AT1G14430	3.63616	2.93322926134621e-34
AT3G26740	4.79757	5.88055100244859e-29	AT3G26730	0.464858	1.93779968904715e-05
AT1G05700	-3.98389	3.82032212564445e-30	AT1G05640	-0.852887	8.72933397216592e-06
AT2G29940	5.6035	1.67481282677257e-69	AT2G29890	0.527832	0.0289226347822074
AT5G49280	-2.01344	8.42688624929714e-19	AT5G49270	-5.69228	1.26009629022159e-77
AT1G51880	-5.75359	8.00641733934526e-38	AT1G51800	-1.22176	0.000697390718735551
AT2G36780	4.16888	6.8181541951568e-15	AT2G36740	0.552313	0.0327706815212257
AT4G25990	7.41703	8.38840946427488e-93	AT4G25960	4.96418	8.69686277185249e-89
AT3G29310	-0.550188	1.02771149541525e-06	AT3G29290	2.71411	1.40163767163686e-58
AT4G15540	1.67266	2.6692074718923e-35	AT4G15500	-1.96172	5.00222497010575e-24
AT1G30400	-1.09065	2.30060163399772e-25	AT1G30360	0.516831	3.2134727311483e-05
AT1G72230	-2.00048	1.62911767939812e-08	AT1G72200	-3.78158	4.71779580767948e-29
AT2G42890	-0.9197	1.55972648369919e-08	AT2G42870	3.22955	6.22794594983233e-46
AT4G16920	-2.32573	3.066915643526e-14	AT4G16890	2.55938	2.02741479868906e-44
AT4G16950	2.61975	7.22284784353196e-50	AT4G16890	2.55938	2.02741479868906e-44
AT3G06780	1.48767	2.06789017838481e-11	AT3G06750	2.39604	2.45514712667275e-103
AT3G19040	2.59765	6.52522389118756e-07	AT3G19000	1.38328	7.16828559248118e-25
AT5G54030	-5.4025	8.84079868946656e-15	AT5G54020	-4.88759	4.8366299666038e-19
AT4G15530	2.46844	2.06049950208947e-24	AT4G15500	-1.96172	5.00222497010575e-24
AT5G21930	3.29193	1.39558739053898e-223	AT5G21222	3.79446	6.5736554884482e-225
AT4G32350	0.418908	0.0101094156876388	AT4G32300	0.828702	0.0121342890309324
AT3G26210	-1.02567	0.0428136604927927	AT3G26170	4.47378	9.48590030271745e-31
AT3G46540	2.06563	1.49190453383537e-55	AT3G46490	2.86735	8.21037109695304e-35
AT4G09770	-5.50785	1.11449315150129e-22	AT4G09720	0.349855	5.86795214749919e-05
AT4G10330	0.393418	0.0175821838535251	AT4G10300	3.22691	2.36928116808532e-80
AT1G21140	-2.31744	2.16162989380301e-07	AT1G21070	0.642836	0.0031727895830048
AT1G22070	-0.876942	8.63487938891017e-12	AT1G22040	-0.752781	0.00154767409661633
AT2G29020	-0.45754	0.0116922241058098	AT2G28960	-5.37377	2.41102155837694e-45
AT3G60350	0.4828	4.73010958812252e-05	AT3G60320	1.7249	1.36760241993734e-39
AT4G02710	-1.90022	8.09204782836348e-13	AT4G02660	-1.45544	0.00144841635090342
AT4G01080	2.11891	1.19390457164954e-09	AT4G01020	0.410132	0.000179935638804866
AT1G15130	-0.341582	0.00155360787686825	AT1G15060	0.823155	8.86623902367572e-12
AT1G22710	1.23768	0.000442347826869566	AT1G22650	3.34537	1.66549962186293e-84
AT1G68790	0.268	0.0151746434043371	AT1G68780	7.49873	9.08371591726231e-73
AT1G51860	-3.94709	1.17390857614013e-46	AT1G51800	-1.22176	0.000697390718735551
AT3G23370	-0.681151	0.03768475411554	AT3G23300	-0.44348	0.000242491938358738
AT1G14030	3.49445	3.78234974311733e-137	AT1G13960	-0.630401	4.46936159604711e-09
AT3G03560	-0.710446	3.22748036171354e-05	AT3G03500	-5.74972	1.80220306325919e-35
AT2G29090	5.60489	3.66061741036352e-23	AT2G28970	-5.31659	4.18982468697422e-130
AT5G53210	6.40716	1.19038335590775e-53	AT5G53150	0.492376	9.27599689683393e-05
AT1G62310	0.531839	4.4539099644249e-05	AT1G62260	-0.578347	0.00600262599986917
AT1G66950	-5.02397	7.42142954142439e-14	AT1G66910	5.73694	4.28099263781876e-86
AT4G14970	0.873577	0.0126144663728256	AT4G14900	-0.308519	0.0178454190074613
AT2G24640	-0.456191	0.0187102957773522	AT2G24520	1.33383	3.49370715869399e-20
AT2G46440	6.00871	3.72912533608907e-39	AT2G46420	2.03138	1.34619139768214e-07
AT1G67420	-1.00395	1.69600718688732e-15	AT1G67400	2.80221	7.00138421226531e-27
AT4G19520	3.09599	1.18530466429375e-17	AT4G19510	1.17714	1.10960855781786e-18
AT2G29110	-2.08381	0.0123179555707828	AT2G29080	0.130048	0.0487208051651598
AT1G22040	-0.752781	0.00154767409661633	AT1G22030	-1.89811	4.39694508573441e-08
AT3G18524	0.510268	0.0192628674251409	AT3G18510	-0.569573	0.0169688630062208
AT4G16900	1.16585	7.73801154939317e-22	AT4G16890	2.55938	2.02741479868906e-44
AT5G15330	0.391504	0.00302667941951365	AT5G15310	6.57638	3.23093143112171e-205
AT1G67510	-0.667581	0.00881669948340081	AT1G67500	-1.03578	5.81599355284701e-06
AT3G14570	-1.40591	1.01429426335341e-06	AT3G14470	-1.45157	3.44124558141978e-12
AT4G16960	-1.53638	0.000183322470094043	AT4G16950	2.61975	7.22284784353196e-50
AT4G19440	-0.4895	0.0182963921659322	AT4G19410	0.470756	2.83772585178351e-05
AT2G14100	-5.36289	2.21524302186654e-31	AT2G14080	4.35706	6.58755995903743e-183
AT3G45620	-1.03542	2.88225863824342e-13	AT3G45600	-1.11352	0.000317429601598576
AT4G13572	7.74895	3.2528133396824e-43	AT4G13550	1.99135	8.05319993806548e-47
AT5G62230	6.04763	9.67841458169798e-40	AT5G62220	0.95387	6.03278426519507e-05
AT3G62630	1.47807	1.59575123112932e-11	AT3G62590	-1.15123	0.0187735361684051
AT4G33330	-2.48724	5.25679695764001e-12	AT4G33270	0.995384	0.0017977692054308
AT4G33000	4.05383	6.52191800702759e-101	AT4G32960	0.500036	0.000314482909142837
AT1G33560	-0.96305	8.42610349465416e-05	AT1G33500	-2.81317	4.43925864684576e-05
AT4G25020	2.10923	7.19004318946972e-07	AT4G24970	0.630069	0.00317507275558084
AT1G57570	-4.89304	3.36847505939349e-27	AT1G56720	1.30607	1.44983835802332e-49
AT5G22410	-4.94953	1.39791296251587e-69	AT5G22355	-4.84654	4.42054091220483e-26
AT2G28830	0.821541	1.36248662448149e-07	AT2G28800	2.74344	2.71225776889006e-66
AT1G32950	-2.48354	1.3960087819152e-09	AT1G32900	5.50165	5.50154724811729e-71
AT3G54440	0.73759	8.19679802834876e-21	AT3G54350	0.503687	2.73832295518053e-06
AT1G75500	-0.44292	0.0342540807853703	AT1G75460	7.14775	1.74559557390169e-238
AT4G27310	3.95534	3.91480909912275e-133	AT4G27290	-4.145	2.41067158694016e-29
AT5G67280	1.93181	1.90909606378447e-27	AT5G67260	1.48049	3.26428488647017e-26
AT1G66980	7.38135	0	AT1G66970	6.69999	7.76316060686033e-215
AT5G04230	5.37806	2.09518392930628e-152	AT5G04140	7.40463	1.23797485802098e-227
AT3G08020	0.976127	1.54263431422659e-12	AT3G07960	-0.908032	0.00236808387653802
AT3G06650	0.896053	1.48485929628757e-13	AT3G06640	2.2149	2.99425924385214e-09
AT4G21750	4.09388	1.15165088157402e-33	AT4G21700	-0.855366	4.93075149412535e-11
AT5G06680	-0.307161	0.00289568135139723	AT5G06670	1.36366	1.3797081618539e-28
AT4G02730	-0.839179	0.000397277331710237	AT4G02660	-1.45544	0.00144841635090342
AT3G11430	-5.20831	6.89970321147247e-35	AT3G11385	-6.55376	6.75041685557771e-20
AT3G48380	-0.301183	0.000289213538494973	AT3G48310	9.15888	2.91192112995899e-53
AT4G32520	0.363447	6.45702174824659e-06	AT4G32460	-0.990472	1.32142967223792e-09
AT4G26000	0.282085	0.0430132982784237	AT4G25960	4.96418	8.69686277185249e-89
AT3G56891	-4.74252	8.19940921392541e-11	AT3G56860	0.59865	8.49641262399108e-10
AT5G66700	-2.15356	1.72155150212454e-06	AT5G66680	-0.538876	2.60685424251577e-05
AT1G70510	1.49626	8.6784284394021e-05	AT1G70500	-2.37498	5.4315105782246e-16
AT4G11950	-1.09042	0.0262722216371062	AT4G11900	7.076	8.60879131104877e-83
AT2G31840	2.93376	3.67982393455971e-90	AT2G31800	0.578147	7.76707728658111e-13
AT1G11730	1.0489	0.0031830585876881	AT1G11720	2.93228	4.49379727985373e-42
AT1G15730	3.35755	3.97876819200447e-224	AT1G15630	-4.46981	7.81254094191949e-16
AT4G35110	-1.03333	0.00150341562538102	AT4G35100	0.824068	0.00164515868026727
AT1G63450	-5.30359	8.87959437446827e-32	AT1G63440	-3.08086	2.57931379491646e-63
AT1G66980	7.38135	0	AT1G66960	-3.92277	8.31383842294798e-06
AT5G19660	-0.29122	0.00828337450458761	AT5G19560	-4.84814	3.02364322298786e-11
AT4G02590	-0.730841	2.13818216552779e-07	AT4G02580	-0.254253	0.00135458932686505
AT5G48290	-4.5722	8.28178044994919e-79	AT5G48250	-0.359373	0.0488379827870742
AT3G56070	-0.593913	0.000941941952029913	AT3G56050	1.2523	1.85282452452566e-25
AT3G23560	-1.78465	1.71651182603744e-29	AT3G23530	1.69133	5.59029699729605e-08
AT1G13040	-0.54745	0.0361487755970943	AT1G12990	1.06327	8.307372301599e-08
AT1G19050	1.18386	0.000173198299284691	AT1G19010	0.844624	1.89615510518833e-08
AT2G36800	5.78445	1.40803302308492e-47	AT2G36720	0.416062	0.0126281868924055
AT5G45290	-0.421688	0.0120291484814903	AT5G45275	-0.690012	0.0141607068534386
AT5G39000	-4.9922	1.19902753421902e-08	AT5G38970	-1.0848	0.00324003637038453
AT4G36220	2.05892	0.000152345458179144	AT4G36180	-0.834027	0.00348514347951598
AT4G19530	6.51413	2.30996843186456e-147	AT4G19500	1.48346	1.57893516643006e-31
AT3G26744	2.38083	1.00083170649381e-60	AT3G26720	-1.00694	1.04326948185909e-11
AT1G67500	-1.03578	5.81599355284701e-06	AT1G67420	-1.00395	1.69600718688732e-15
AT2G24600	2.85683	4.64675031791423e-07	AT2G24520	1.33383	3.49370715869399e-20
AT2G20250	5.05851	2.15590023844444e-96	AT2G20190	0.322571	0.00174849454977593
AT3G47370	-0.515311	1.23415088245857e-06	AT3G47340	5.50478	1.69868612510841e-09
AT2G43680	-0.365056	0.0123096961480184	AT2G43620	5.48761	7.0147764491327e-17
AT5G05980	-0.490109	0.000154004756653374	AT5G05880	-3.0422	1.61911100061921e-41
AT1G51880	-5.75359	8.00641733934526e-38	AT1G51800	-1.22176	0.000697390718735551
AT3G05040	-0.380385	0.0072670085460063	AT3G04960	1.33581	0.000374609841023187
AT1G63350	1.12647	2.50942866144952e-05	AT1G63240	2.39573	8.5803836374301e-38
AT1G06890	-0.673313	2.21345502032887e-07	AT1G06820	1.46314	1.74519689554714e-60
AT4G11670	-0.462391	0.000578035696335415	AT4G11610	-5.61028	1.96617018918136e-19
AT1G60810	-0.896524	1.35592157818194e-28	AT1G60800	1.63703	3.56307710118211e-42
AT4G01430	-1.32707	1.87562148204295e-10	AT4G01410	0.960803	1.63190418708367e-05
AT1G70940	1.6322	1.08081107907901e-16	AT1G70900	0.601008	0.000305011351230392
AT3G48050	-0.21971	0.00956971279932326	AT3G48030	-0.321751	0.00305845065150885
AT4G04910	-0.577601	4.97832866191823e-09	AT4G04890	3.71555	2.38230583741627e-36
AT3G66658	-0.586835	4.12297179493997e-10	AT3G06640	2.2149	2.99425924385214e-09
AT2G18990	0.260693	0.0298322929636785	AT2G18960	-0.306745	0.0460319214164212
AT2G28960	-5.37377	2.41102155837694e-45	AT2G28950	3.42492	2.77060406899097e-61
AT3G23840	4.10373	3.2240272768074e-30	AT3G23820	0.58401	3.96166893682969e-05
AT1G30420	-2.00563	2.07427282472961e-14	AT1G30400	-1.09065	2.30060163399772e-25
AT5G57790	2.52723	1.6591568521633e-31	AT5G57780	3.69474	5.38645629006225e-76
AT1G53710	-0.712622	3.77270823268272e-13	AT1G53700	-1.17916	2.0262765549345e-05
AT1G66240	-0.839397	7.68097045966993e-05	AT1G66230	1.77547	2.70133567066035e-10
AT1G66970	6.69999	7.76316060686033e-215	AT1G66940	8.30084	2.67811604995356e-136
AT4G14640	-2.6017	3.36420487304634e-12	AT4G14605	1.75593	1.50506018269199e-21
AT1G51830	-5.56695	4.51836677937221e-59	AT1G51800	-1.22176	0.000697390718735551
AT5G04190	7.13978	3.65984908421071e-84	AT5G04140	7.40463	1.23797485802098e-227
AT1G56520	6.81212	1.85283684800453e-72	AT1G56500	4.0111	3.33265162847515e-131
AT1G50450	4.17946	6.854344656849e-76	AT1G50380	-0.335948	0.000981459657236001
AT1G30755	-0.846839	8.31185749040791e-08	AT1G30680	1.46757	7.14584221449414e-29
AT2G29320	0.990224	0.000675468637501596	AT2G29290	8.77262	3.25688570577712e-117
AT5G50950	6.1271	1.40186331499601e-79	AT5G50940	1.16245	0.000401902225450875
AT1G79620	-0.974573	1.25866340577251e-08	AT1G79560	1.85967	1.12908474345669e-14
AT1G75250	2.95927	8.55148810425194e-06	AT1G75240	6.95089	2.13673226032525e-164
AT4G23190	0.949552	0.0112233727227386	AT4G23170	4.27946	6.59824413301982e-35
AT5G23440	2.0871	2.5670038207467e-42	AT5G23430	-0.853152	1.21849297777916e-19
AT5G20230	4.72113	5.08612734632368e-58	AT5G20220	2.90305	2.08045361629059e-37
AT1G63750	2.68573	2.21561601326895e-34	AT1G63700	0.430874	0.000901994317630334
AT1G74470	5.26401	1.15176495966908e-252	AT1G74460	-5.09284	2.76723772571581e-44
AT1G63520	-1.64167	3.96460628505672e-05	AT1G63500	-0.406534	0.00192644943403168
AT3G47470	6.24911	6.58712260229039e-170	AT3G47450	3.60313	5.72727735857587e-107
AT1G63770	0.256064	0.0481110763202539	AT1G63700	0.430874	0.000901994317630334
AT1G53350	1.14402	2.87398606317224e-11	AT1G53310	-1.34852	3.32241668751293e-40
AT1G63690	0.474601	1.51161850848892e-06	AT1G63680	2.1367	7.09746725081221e-43
AT1G74860	0.584255	0.000176995215600604	AT1G74850	2.73172	2.8872938630205e-116
AT2G29630	3.53512	3.93327578176328e-100	AT2G29620	-4.71542	4.51363546488392e-64
AT2G37840	-0.376545	0.00666051823627552	AT2G37770	6.06557	2.21492989010461e-11
AT1G01900	1.19483	2.20031643113577e-07	AT1G01790	2.94604	3.3827967192309e-38
AT1G58190	-2.12865	7.7634987500645e-11	AT1G58180	1.24045	4.91921306905333e-19
AT3G05350	2.13184	2.37939104446102e-61	AT3G05330	1.00152	1.05512620305517e-05
AT1G13950	-2.72983	2.5593432825737e-63	AT1G13940	0.470995	8.04779319224279e-05
AT4G05120	0.996069	5.02479773763471e-07	AT4G05110	4.26872	6.45769134230748e-09
AT3G25800	-0.366881	0.00540516122317617	AT3G25780	-3.16683	6.09556392111134e-22
AT1G75240	6.95089	2.13673226032525e-164	AT1G75210	1.36632	2.26396198499253e-16
AT3G52525	3.90659	1.35583195347222e-23	AT3G52500	1.55146	1.88135308339438e-07
AT2G01460	-0.438554	0.0061468004602199	AT2G01440	0.769447	8.63117336134541e-14
AT3G26200	7.13023	2.83370302680337e-47	AT3G26180	5.47104	2.99532126186073e-28
AT5G02830	3.14149	1.12002406293175e-31	AT5G02780	-5.45508	4.45003177841748e-68
AT5G50950	6.1271	1.40186331499601e-79	AT5G50920	2.37385	2.22565892649025e-71
AT3G07360	0.838156	6.21709237879104e-17	AT3G07350	2.21583	9.83663853029963e-61
AT2G45180	5.40614	2.16145275382259e-32	AT2G45150	1.49251	1.0858451051828e-13
AT1G56520	6.81212	1.85283684800453e-72	AT1G56500	4.0111	3.33265162847515e-131
AT2G43340	-0.518965	3.9260368932949e-05	AT2G43320	-0.778584	5.22509928491435e-07
AT5G50020	0.510759	2.60830508523571e-05	AT5G49990	-0.568401	0.0469486917093269
AT1G73720	0.217793	0.0234912772134125	AT1G73710	1.28816	5.84564543999485e-24
AT3G50670	0.494	0.0105678326842771	AT3G50640	-5.73966	1.79675292049367e-35
AT4G16890	2.55938	2.02741479868906e-44	AT4G16860	3.98441	5.62444500461666e-89
AT5G54670	-1.03332	0.00158804730080323	AT5G54630	6.79613	1.49912419554343e-201
AT1G75850	-0.368963	1.53869952140117e-05	AT1G75820	0.4959	3.75319746133699e-06
AT5G59710	0.353864	0.000306372031080478	AT5G59680	-5.00359	5.7167764084034e-13
AT3G02510	1.17897	1.62473649707217e-28	AT3G02420	-0.711568	2.90871880729132e-14
AT3G06860	-0.883159	3.10610602181407e-21	AT3G06810	-0.207986	0.00875186115034568
AT2G38700	-0.750916	2.40570596244478e-07	AT2G38660	-0.372117	0.0242482038634731
AT3G04160	0.483896	0.00243206365287192	AT3G04080	-0.840832	1.40902396632268e-12
AT1G29200	-1.57029	1.18990163558384e-05	AT1G29120	0.661774	1.42061038381153e-11
AT3G10500	-3.05035	1.67206982609385e-51	AT3G10420	2.34309	6.79219784901263e-32
AT1G67490	-0.290304	0.044353926516349	AT1G67460	0.867474	0.0300367359667032
AT5G59710	0.353864	0.000306372031080478	AT5G59680	-5.00359	5.7167764084034e-13
AT1G16410	5.31924	8.47256719614396e-108	AT1G16310	-1.93327	2.01648822361325e-21
AT2G17070	-4.88323	1.07405052041308e-12	AT2G17050	-3.20113	7.70293225548829e-19
AT2G02090	-0.351952	0.00502047606133363	AT2G02080	3.21409	5.24490371773112e-175
AT2G25170	0.509542	0.00905829422291053	AT2G25140	-0.888456	5.7815581793991e-16
AT2G16280	1.79867	3.51715682210387e-14	AT2G16270	1.0488	2.65164259627428e-06
AT3G55160	-0.555484	0.0488099497378342	AT3G55130	5.86438	7.5614483398405e-129
AT3G13510	0.578993	0.0171519168884789	AT3G13490	1.64974	3.19682035578309e-26
AT5G59030	3.85757	1.29340007416279e-132	AT5G59020	-0.599066	0.000947026649769804
AT1G14280	5.45426	1.5121104253871e-153	AT1G14250	7.67331	7.83181283063189e-50
AT5G46470	0.726949	0.00168750164222977	AT5G46420	2.58735	8.29590489917502e-145
AT5G44740	1.22268	5.96530099269967e-08	AT5G44700	-3.35799	5.24092082899956e-26
AT5G18410	0.324768	0.00386043419092279	AT5G18360	-1.15391	6.20833154414671e-09
AT4G31650	1.21901	1.54273012440791e-08	AT4G31570	-0.458193	0.00163032084316191
AT5G01330	-5.24585	4.98964324439834e-41	AT5G01320	1.34542	0.000315282590167463
AT1G13050	-0.677153	0.00382241411866452	AT1G13040	-0.54745	0.0361487755970943
AT1G05030	1.24399	1.84378792935245e-22	AT1G05020	3.41185	8.40879852513362e-17
AT1G05490	0.702647	0.0496119892926467	AT1G05460	0.840479	2.2223853842024e-05
AT5G40100	-2.58999	1.18678703549108e-28	AT5G40060	2.2706	2.80021801743581e-41
AT3G07070	-5.44094	3.5404283874614e-24	AT3G06980	2.60585	4.09989101966029e-89
AT1G32950	-2.48354	1.3960087819152e-09	AT1G32900	5.50165	5.50154724811729e-71
AT2G19920	4.37394	9.60249418790977e-31	AT2G19900	-2.69316	0.000225244284634678
AT3G11390	-2.11196	7.47385255465368e-05	AT3G11320	-1.85341	8.23794087081761e-49
AT4G18490	0.857868	0.00413577693739698	AT4G18465	-0.271551	0.0339138032585768
AT5G59090	-5.31788	1.87316330636941e-68	AT5G59080	2.52157	1.27161978537156e-26
AT4G22840	-1.51296	3.17758006354667e-07	AT4G22810	-5.41664	1.12726789762446e-28
AT1G66920	4.75331	9.20572111395409e-46	AT1G66890	1.63768	1.48568452820475e-08
AT5G10940	0.353342	1.50466118117699e-06	AT5G10900	0.391536	0.0081413291975232
AT1G75260	-0.93303	0.01057399746198	AT1G75240	6.95089	2.13673226032525e-164
AT5G44870	2.20358	3.54236705501637e-34	AT5G44820	-2.45261	2.82743853108289e-08
AT1G49475	-2.49528	5.3093142635555e-06	AT1G49430	0.781004	0.000535511767299244
AT1G10790	-1.97251	0.00140698634808183	AT1G10760	1.75451	2.63900408842521e-21
AT3G23530	1.69133	5.59029699729605e-08	AT3G23480	7.36785	1.79091746014861e-66
AT1G52000	7.69951	1.24385322926244e-111	AT1G51980	-0.690169	9.84925615766409e-20
AT5G59130	6.55007	3.24975647582761e-25	AT5G59080	2.52157	1.27161978537156e-26
AT1G56540	0.944678	1.14056757780877e-05	AT1G56500	4.0111	3.33265162847515e-131
AT1G07530	-0.427403	0.0363443999366789	AT1G07450	4.50015	2.00119776342325e-09
AT1G48520	2.84301	1.62160052464376e-148	AT1G48490	-0.806554	1.96060413154423e-10
AT2G31083	-6.24796	1.0301155136567e-31	AT2G31070	3.71341	2.38652782812119e-60
AT1G17650	3.34228	5.0967583599559e-113	AT1G17580	0.699362	2.07613777888484e-05
AT3G57610	0.584613	1.96657031447432e-05	AT3G57590	0.407374	0.0227000621625844
AT1G62630	6.50703	8.79148009558379e-52	AT1G62560	3.92646	7.2850452207202e-37
AT4G29230	-1.66421	8.18770542506471e-12	AT4G29180	-5.28886	4.23102470469114e-41
AT1G80010	-0.390018	0.0133412489164081	AT1G79930	-0.65584	2.98004475553115e-05
AT3G59480	-4.15429	3.4929230752573e-38	AT3G59410	0.623349	7.84369318214983e-11
AT5G57500	-1.7604	1.34630880618025e-06	AT5G57490	-0.326829	0.0119950681115848
AT5G12290	-0.488363	4.53506404809942e-06	AT5G12280	-2.69259	2.13050769814757e-09
AT2G26580	8.68214	6.90640164683259e-59	AT2G26570	0.395293	0.00243059542518882
AT5G24210	7.03964	1.30803500995815e-81	AT5G24205	5.32064	1.66503702821531e-13
AT1G16150	-2.3512	2.91053217266538e-08	AT1G16120	-5.37175	7.40946896312802e-23
AT4G11380	-0.378213	6.51874466855405e-07	AT4G11330	1.11326	0.000129656043165397
AT5G13530	-0.300733	0.00363645703745587	AT5G13500	-0.890222	8.66756747618576e-30
AT3G06640	2.2149	2.99425924385214e-09	AT3G06620	-0.383701	0.00341491988438439
AT2G42600	3.50497	1.44582966782773e-57	AT2G42580	1.46886	3.67538541984551e-10
AT5G12370	0.480932	2.20074806251269e-06	AT5G12290	-0.488363	4.53506404809942e-06
AT2G29110	-2.08381	0.0123179555707828	AT2G29090	5.60489	3.66061741036352e-23
AT5G07700	5.3448	4.51174554115452e-15	AT5G07660	1.17414	0.000102932782758489
AT1G15290	3.524	1.28436183775593e-38	AT1G15240	0.392317	0.0165111911145267
AT3G50560	3.44423	1.08129524298478e-13	AT3G50530	0.396044	1.93582009351432e-05
AT3G09320	-0.71132	9.9965704103418e-07	AT3G09300	-0.548387	4.03378208287599e-07
AT3G57830	1.4437	1.53934966924452e-12	AT3G57810	1.40968	3.15679423440062e-32
AT2G32550	1.07431	0.0199094978608395	AT2G32530	4.52586	1.33096331551956e-66
AT5G59030	3.85757	1.29340007416279e-132	AT5G59020	-0.599066	0.000947026649769804
AT3G57680	5.66192	2.83336553352961e-14	AT3G57670	0.530582	0.0182271948780159
AT3G55130	5.86438	7.5614483398405e-129	AT3G55090	-1.68221	1.18814474791484e-06
AT5G27740	0.462141	8.06413838527102e-07	AT5G27730	0.91984	0.000581137025307056
AT2G26470	0.511916	0.000274811861276597	AT2G26440	3.63399	2.2834387943874e-38
AT5G13530	-0.300733	0.00363645703745587	AT5G13490	-0.897806	2.62741992863995e-07
AT1G20490	-1.05065	7.64734540250074e-08	AT1G20380	-0.757441	0.0201247178712915
AT1G47640	-0.779128	1.45021629453043e-09	AT1G47580	2.89665	6.83263109347817e-71
AT4G17150	0.472996	0.0148080805078743	AT4G17140	-0.660887	5.65472822055131e-08
AT4G39270	-1.67059	2.08810264517765e-26	AT4G39260	-1.33886	6.27567466173302e-13
AT4G16960	-1.53638	0.000183322470094043	AT4G16950	2.61975	7.22284784353196e-50
AT3G27020	0.781505	1.13190119143735e-05	AT3G27000	-0.737956	1.98825721211129e-08
AT4G36880	-1.98186	1.79434492032059e-05	AT4G36870	3.88858	2.36134279072347e-17
AT2G25210	-0.432599	3.03125161766436e-06	AT2G25170	0.509542	0.00905829422291053
AT3G58160	1.97802	5.21665031848044e-09	AT3G58140	2.43782	7.79075161812968e-101
AT4G08960	-0.357057	0.042405204635784	AT4G08920	2.32531	3.88180016477283e-69
AT5G02260	-1.51185	2.24663453380276e-38	AT5G02240	2.58919	7.09374321605491e-250
AT2G01970	-0.490886	1.32641003126684e-10	AT2G01950	-2.05454	2.63682591736927e-10
AT5G43940	0.431911	0.00051032686697786	AT5G43900	-0.288484	0.0138091185379544
AT5G25130	2.71872	4.87217995959606e-14	AT5G25100	-0.257566	0.0274886728377645
AT1G63740	-0.361071	0.0109972440689442	AT1G63700	0.430874	0.000901994317630334
AT2G30470	0.543339	1.63316938731647e-07	AT2G30420	8.55442	4.63158490837982e-15
AT4G04920	-0.657397	2.9838677288452e-12	AT4G04890	3.71555	2.38230583741627e-36
AT4G04920	-0.657397	2.9838677288452e-12	AT4G04890	3.71555	2.38230583741627e-36
AT2G19450	-1.5088	3.006984251951e-15	AT2G19400	3.19378	3.78875682077421e-27
AT4G13800	6.71554	1.10161102834725e-17	AT4G13730	0.358693	0.00338387058094098
AT1G57820	0.506588	0.0112752384479562	AT1G57700	-0.444505	0.0235058271299099
AT5G49810	-0.875383	1.46524939215444e-26	AT5G49770	-5.34104	1.2767702966006e-56
AT1G58037	-5.0852	2.09477642777649e-18	AT1G57820	0.506588	0.0112752384479562
AT3G24240	-5.48013	4.81136665203793e-27	AT3G24210	-5.9471	4.26246118247856e-25
AT4G22080	-5.80722	5.47366843625422e-28	AT4G22070	-4.95157	8.85151269780998e-26
AT3G23830	-1.39272	3.347225071211e-09	AT3G23820	0.58401	3.96166893682969e-05
AT1G15310	-1.72742	7.97560343422516e-36	AT1G15240	0.392317	0.0165111911145267
AT4G33985	-1.29407	6.40103982802119e-08	AT4G33970	-0.867294	0.0353675691443471
AT4G16892	2.88438	6.73194512868525e-12	AT4G16890	2.55938	2.02741479868906e-44
AT1G28660	2.2135	9.36934055770435e-07	AT1G28610	4.4693	1.59930017521261e-30
AT1G65790	4.74639	6.44078888187441e-14	AT1G65730	-2.97413	9.28649100536923e-27
AT5G03640	-2.8078	3.6033631494142e-20	AT5G03620	3.15474	5.63927144827522e-14
AT2G36990	3.9445	2.56105947312085e-288	AT2G36970	4.44111	2.11378405237162e-28
AT1G51860	-3.94709	1.17390857614013e-46	AT1G51830	-5.56695	4.51836677937221e-59
AT3G47760	-5.23565	3.72936009656541e-08	AT3G47700	-0.48506	0.000406349121079177
AT3G50570	5.17816	2.34366150850149e-14	AT3G50560	3.44423	1.08129524298478e-13
AT5G61550	-5.00928	7.8203289183316e-51	AT5G61530	-0.572342	1.23218756403829e-05
AT5G38430	7.74318	3.87646159150926e-219	AT5G38420	7.95378	4.21861123925607e-170
AT4G24450	2.42363	3.29259130209588e-26	AT4G24400	-0.721998	7.26665445266791e-23
AT4G19820	7.39876	1.76664378476993e-16	AT4G19710	1.04694	6.06793012313739e-08
AT2G34680	-0.393594	0.000905626097604191	AT2G34660	-0.762732	0.0297161577082012
AT2G39890	-0.611211	0.0285960398491108	AT2G39880	1.19157	0.000128843435463368
AT5G22780	-0.220304	0.0392847883573017	AT5G22770	-0.307172	0.000562850769522665
AT4G02760	-1.75738	7.82577786287996e-53	AT4G02730	-0.839179	0.000397277331710237
AT1G51880	-5.75359	8.00641733934526e-38	AT1G51805	7.1917	1.37600524771529e-223
AT4G35100	0.824068	0.00164515868026727	AT4G35090	1.26252	2.36053537547207e-09
AT1G56510	7.00144	6.28193826751109e-75	AT1G56500	4.0111	3.33265162847515e-131
AT2G34690	-0.930724	0.000104834901054455	AT2G34680	-0.393594	0.000905626097604191
AT2G14620	-0.859178	0.00127405658508643	AT2G14560	3.23034	0.000493283088819906
AT4G19520	3.09599	1.18530466429375e-17	AT4G19500	1.48346	1.57893516643006e-31
AT5G51230	0.518097	0.000666291908315234	AT5G51200	0.632463	0.0121483054205893
AT3G20300	2.5611	6.9368548099174e-35	AT3G20270	1.94972	7.00265063176056e-30
AT1G65850	-3.47514	2.95833870147107e-08	AT1G65730	-2.97413	9.28649100536923e-27
AT3G48550	1.42332	1.91288163212515e-10	AT3G48490	0.617376	0.0109978804946902
AT4G02180	-3.82187	5.24549468853908e-40	AT4G02100	-0.730566	3.2536847862339e-07
AT5G45520	4.72077	1.58830379545489e-26	AT5G45460	0.386666	0.0282895825963084
AT1G68200	-1.46495	0.00303999109648037	AT1G68185	0.351411	0.00780035942105662
AT1G22590	6.21873	9.36734637723064e-84	AT1G22570	3.27631	1.7730425682099e-42
AT4G11610	-5.61028	1.96617018918136e-19	AT4G11570	2.69174	1.20057807691762e-29
AT5G40060	2.2706	2.80021801743581e-41	AT5G40030	-1.71475	2.54080510122274e-07
AT3G01720	-2.14666	8.70039837653817e-43	AT3G01670	0.592721	0.0082067946495729
AT3G06630	-2.36349	1.083283460225e-13	AT3G06620	-0.383701	0.00341491988438439
AT1G19100	0.472877	0.00264739045539886	AT1G19080	0.559541	0.0197578967730291
AT2G39010	6.04218	7.2343054992986e-77	AT2G38970	0.545547	8.14713739951192e-05
AT5G51560	0.91932	3.76350456114989e-05	AT5G51550	2.03684	3.05688167674194e-22
AT2G23000	3.85127	3.6437889814708e-25	AT2G22980	3.78752	3.67984039566558e-16
AT1G35240	-4.05416	5.77631887495532e-13	AT1G35220	-0.805535	3.57625456271584e-11
AT1G29640	-4.13282	6.50572107238844e-15	AT1G29600	-1.53508	9.93220974302133e-09
AT1G21130	2.36096	2.32607385644424e-07	AT1G21090	-0.924189	1.2869918795406e-07
AT1G74860	0.584255	0.000176995215600604	AT1G74810	3.63025	3.11236906844807e-05
AT3G11130	-0.614051	5.3780001684663e-12	AT3G11110	7.31964	1.27597982392606e-33
AT2G17820	-0.580343	0.00305343140010116	AT2G17787	0.777503	2.15727929029203e-09
AT1G16080	2.8981	2.21162765146811e-49	AT1G16040	-0.571868	2.05798176967725e-05
AT2G29670	5.03881	9.41713087699423e-104	AT2G29630	3.53512	3.93327578176328e-100
AT1G79860	-4.80709	6.19306061980694e-11	AT1G79840	0.684838	0.0337105791967095
AT2G34640	2.77162	9.68297091642039e-52	AT2G34590	0.703679	2.25881106381046e-05
AT2G23910	-1.56538	1.52739388492964e-05	AT2G23840	4.59354	2.81097616474796e-62
AT2G43040	-2.12208	1.05406008816757e-39	AT2G42960	0.611718	0.000703506801967399
AT2G14860	0.741599	0.000868454708208177	AT2G14835	-0.344556	8.19937668263784e-05
AT5G24210	7.03964	1.30803500995815e-81	AT5G24160	3.36316	1.02841768466305e-11
AT4G14500	0.86978	2.92941803205681e-24	AT4G14450	2.8059	1.40675701612119e-09
AT4G02010	-0.418542	0.000335802618548549	AT4G01970	-2.9199	0.00069959473171885
AT4G33210	0.317537	0.015812138104005	AT4G33180	0.827371	7.93526840123096e-05
AT1G19380	2.42321	8.62846497333002e-09	AT1G19350	2.36749	3.36568889063581e-145
AT1G44608	-4.37783	1.05980248698841e-12	AT1G44350	1.98976	1.40391937245328e-13
AT4G01590	0.316939	0.0199094978608395	AT4G01580	3.03448	3.22155058899385e-34
AT4G34860	-0.903666	1.2356801844011e-14	AT4G34770	6.7173	3.86149300874787e-26
AT1G69910	1.63813	5.44841763535238e-39	AT1G69840	1.62565	8.45908791780558e-12
AT5G35840	0.412566	0.000350414950304368	AT5G35790	4.60347	2.00305455841723e-233
AT2G44490	0.9889	7.0566891818856e-10	AT2G44450	-2.51447	1.58371302627513e-50
AT5G65440	0.632459	0.0175967104557511	AT5G65410	6.93044	1.83509737079729e-102
AT2G32840	0.487423	0.000183509902566257	AT2G32795	2.7413	5.11876976599926e-18
AT1G65620	2.9509	3.05732143696332e-16	AT1G65480	3.10776	1.0725854743716e-08
AT1G12620	0.440002	0.00245127255591869	AT1G12570	4.33362	3.36978202202541e-18
AT5G19090	0.84517	3.2232227181392e-12	AT5G19050	-0.858445	1.48684963229048e-05
AT2G30340	-5.10924	8.50865581261768e-23	AT2G30280	0.432897	0.00210358611492398
AT5G28050	-0.439426	0.016165413940992	AT5G28010	2.02833	1.32398832425447e-08
AT1G63740	-0.361071	0.0109972440689442	AT1G63690	0.474601	1.51161850848892e-06
AT2G17070	-4.88323	1.07405052041308e-12	AT2G17036	1.27253	4.81111749081277e-06
AT2G22240	1.25192	6.46531664545871e-05	AT2G22140	0.965054	0.00563591921930411
AT3G08620	0.320468	0.0291067496429016	AT3G08580	-0.832284	6.69372984396194e-28
AT5G02250	1.65912	1.0491654758894e-60	AT5G02170	-1.36912	0.0403793107169038
AT1G26200	-1.71172	0.000532292389148162	AT1G26130	0.995857	4.4803057925114e-09
AT3G47790	-5.48692	5.99024878662541e-40	AT3G47740	-5.63629	6.10719748128447e-13
AT1G23310	4.89841	1.19562016154265e-172	AT1G23210	-4.2004	4.50682096753618e-15
AT3G21280	0.565193	5.89397766754738e-09	AT3G21230	-1.88253	3.76207980676136e-21
AT5G51270	-3.9176	1.16742306691665e-15	AT5G51180	0.64846	6.14257117091158e-07
AT2G23630	-5.60009	1.10651418436313e-14	AT2G23520	0.222139	0.030530085553899
AT1G61140	-0.696563	1.64313013354489e-05	AT1G61100	0.77138	0.00786332354119652
AT5G16750	-0.566043	0.0203142938751649	AT5G16680	-0.351551	0.000234395620125717
AT2G25730	-0.499285	3.9767340778697e-05	AT2G25660	0.951462	2.51238288625386e-11
AT5G06780	0.325538	0.00155781019935171	AT5G06680	-0.307161	0.00289568135139723
AT3G55160	-0.555484	0.0488099497378342	AT3G55110	5.61368	5.11312067636934e-37
AT1G50420	-1.13128	9.88396023194296e-17	AT1G50360	-0.612003	8.36906877577787e-08
AT2G37280	-2.74377	5.57433906386387e-20	AT2G37250	-1.03929	4.73084919056197e-24
AT4G16900	1.16585	7.73801154939317e-22	AT4G16880	7.48101	6.81002425650426e-49
AT5G44040	0.958257	1.28677777840816e-20	AT5G44020	1.36463	0.000377968761221796
AT1G22490	2.69982	7.61123839546691e-16	AT1G22470	-2.35379	8.52015135068848e-09
AT4G16960	-1.53638	0.000183322470094043	AT4G16950	2.61975	7.22284784353196e-50
AT1G68740	1.84459	1.09825278460661e-12	AT1G68720	0.457069	0.00931986141227023
AT1G53340	-2.84944	1.1317532515003e-13	AT1G53310	-1.34852	3.32241668751293e-40
AT3G47290	6.01018	5.45886230690412e-193	AT3G47250	5.84948	5.80859690495683e-39
AT3G47390	0.635396	6.46773803415793e-05	AT3G47360	-1.069	7.57487777227808e-07
AT1G33600	4.97643	5.66838617292915e-141	AT1G33560	-0.96305	8.42610349465416e-05
AT4G25410	-2.6638	5.58492089495126e-10	AT4G25390	-1.31596	3.20171642581226e-07
AT1G32120	3.63966	3.46473626897491e-62	AT1G32060	7.50235	2.25705537972321e-199
AT5G26570	1.72342	3.30117806669103e-59	AT5G26340	1.42354	1.36975615035852e-08
AT1G16780	2.35469	3.89468240836797e-69	AT1G16720	3.92088	2.78018664431929e-103
AT1G06890	-0.673313	2.21345502032887e-07	AT1G06840	-1.23833	1.37824102928753e-10
AT5G27650	0.31026	0.00105547935869092	AT5G27630	1.69586	8.05847939308634e-10
AT1G18620	3.08494	2.08421005418589e-40	AT1G18610	0.744233	5.68135848973648e-08
AT3G01720	-2.14666	8.70039837653817e-43	AT3G01680	0.752765	1.65917030050376e-06
AT1G16160	-4.77542	4.36839964047331e-18	AT1G16110	1.07539	0.000129305011370724
AT1G16780	2.35469	3.89468240836797e-69	AT1G16750	4.39199	2.35278432357853e-124
AT5G18770	0.517433	0.000788489880900868	AT5G18700	0.988833	0.000141041846594824
AT1G55430	-5.05875	1.87420674631167e-35	AT1G55420	-4.58703	4.29335823796162e-41
AT1G11600	3.72042	2.28176754669768e-55	AT1G11490	-2.32697	3.07386729699305e-05
AT1G72930	4.82094	6.96535465984702e-58	AT1G72910	6.47131	3.84616007531924e-64
AT5G38430	7.74318	3.87646159150926e-219	AT5G38410	7.83776	1.68463897626054e-161
AT5G62000	0.706843	1.44996545250223e-12	AT5G61980	-1.47523	1.14136370702174e-19
AT3G10720	2.31323	8.01131750505621e-14	AT3G10690	1.02191	0.000340394960032226
AT5G49850	-2.38799	3.23269488306557e-07	AT5G49820	1.31276	1.6560569218538e-52
AT3G18290	1.95919	5.02070718758744e-101	AT3G18280	-2.06153	1.9826640067401e-44
AT1G49740	0.404323	0.02006760076966	AT1G49730	3.06561	1.21407088421478e-207
AT4G19410	0.470756	2.83772585178351e-05	AT4G19390	1.43769	5.67149825443992e-05
AT3G06760	0.869192	3.39603870624934e-08	AT3G06750	2.39604	2.45514712667275e-103
AT4G08980	0.226415	0.0349068898670498	AT4G08960	-0.357057	0.042405204635784
AT5G35430	-0.358746	0.000474964484701441	AT5G35410	-0.398129	0.00486759550554237
AT5G19340	-0.717723	0.00655900134947074	AT5G19310	0.857012	0.00353401242090045
AT4G21430	0.83206	0.000192304268750874	AT4G21400	-0.667434	0.00545484596958505
AT5G53150	0.492376	9.27599689683393e-05	AT5G53130	1.03822	1.3178191191047e-13
AT4G35950	1.03098	3.0063331095046e-12	AT4G35920	0.438461	0.000519143655279786
AT3G55160	-0.555484	0.0488099497378342	AT3G55110	5.61368	5.11312067636934e-37
AT5G45200	-5.13828	2.58913987951404e-15	AT5G45150	0.959186	0.00604857026063387
AT1G15290	3.524	1.28436183775593e-38	AT1G15210	-5.23768	7.77927335712567e-76
AT2G43500	1.15731	0.000711334696062141	AT2G43490	-0.716703	0.00140610453235605
AT5G67290	0.966758	4.52016736473634e-10	AT5G67280	1.93181	1.90909606378447e-27
AT3G09300	-0.548387	4.03378208287599e-07	AT3G09240	-4.39272	5.87859471068773e-27
AT1G58602	6.48534	3.72491263006463e-200	AT1G58520	0.9433	0.00984720967903111
AT5G03430	0.695646	4.9633007860214e-07	AT5G03406	0.629152	0.000251650329048443
AT5G40100	-2.58999	1.18678703549108e-28	AT5G40010	-5.36772	7.62710010642263e-15
AT1G07180	7.05513	6.94723710227099e-94	AT1G07175	-3.85582	2.62699921365285e-05
AT3G19620	3.3327	5.21665031848044e-09	AT3G19570	1.12971	3.86704846049311e-11
AT1G65660	0.661344	2.52718171461493e-08	AT1G65570	-5.7582	5.63977158133075e-18
AT3G13275	-0.5099	0.0213703697866885	AT3G13240	0.829511	0.00109012679558408
AT3G25030	0.566821	0.0117582041441964	AT3G25020	0.774277	0.00285494211672073
AT2G20360	-0.341632	0.00019025643004537	AT2G20340	1.62803	7.73030852265257e-06
AT2G35310	1.5115	0.00614243114258383	AT2G35260	5.77801	9.99351019790634e-223
AT2G30230	0.556569	0.0464688742855416	AT2G30210	-4.80122	2.3844137792559e-22
AT2G29690	1.05712	1.310796696904e-07	AT2G29670	5.03881	9.41713087699423e-104
AT2G27860	0.433628	0.0425473461019134	AT2G27810	1.37461	8.88550918157947e-18
AT5G45105	-5.47019	1.46016089986977e-11	AT5G45060	1.15985	1.05861556193097e-11
AT1G65620	2.9509	3.05732143696332e-16	AT1G65590	0.489839	0.020241581747878
AT3G07565	0.497757	2.19709852704713e-07	AT3G07540	1.87828	5.06055040204415e-23
AT2G40950	-0.586684	0.000101915021353515	AT2G40930	0.248596	0.0131024394867963
AT1G03080	-1.12717	3.01299459744814e-09	AT1G03060	-0.531658	0.00200253536972067
AT1G48270	-0.27467	0.0371425626593999	AT1G48260	1.69354	1.75860235568086e-13
AT3G04350	-1.08303	0.000113703192826579	AT3G04290	8.02325	1.2463442328205e-237
AT2G29300	6.08807	9.13986896339878e-54	AT2G29200	-0.965202	1.09116156298038e-06
AT3G23080	1.37186	1.10050421531153e-15	AT3G23050	2.07193	4.69578170846944e-23
AT5G24360	-0.422663	0.00102228610660156	AT5G24340	0.459265	0.000141987717613109
AT5G65950	-0.268856	0.0162691464614521	AT5G65910	-0.20877	0.0310008904801185
AT3G54440	0.73759	8.19679802834876e-21	AT3G54360	1.79588	9.29636533597355e-31
AT1G48540	1.07466	3.26691132373036e-12	AT1G48500	-3.74518	1.25061329402822e-34
AT4G18170	1.99327	8.091922044438e-08	AT4G18120	-0.405315	0.00390350535517132
AT3G20090	-2.50118	2.91574966655281e-36	AT3G20040	-0.921186	1.92463334278304e-08
AT5G49570	-0.44052	0.000346936860853747	AT5G49510	-0.331453	0.000421282568962854
AT3G03250	-0.6261	1.4699268489359e-09	AT3G03200	-0.772042	0.00715065511023148
AT4G39950	-2.21337	1.09048411276042e-15	AT4G39900	1.35792	3.81112437315686e-16
AT1G64000	-4.73954	2.2405244397939e-21	AT1G63930	-2.38904	2.38808491964113e-11
AT5G63760	-1.21544	0.000889980939831011	AT5G63700	1.93543	6.56487099522947e-11
AT4G36270	1.65065	0.000107499271056526	AT4G36195	-0.346941	0.0206838321197364
AT5G52910	1.27553	0.00042239266383781	AT5G52860	5.9719	5.97731739844513e-67
AT4G23050	-1.37574	2.89096733369068e-51	AT4G23000	1.41827	1.06641261517223e-05
AT5G19660	-0.29122	0.00828337450458761	AT5G19550	-1.07897	2.78593145917428e-05
AT1G63750	2.68573	2.21561601326895e-34	AT1G63700	0.430874	0.000901994317630334
AT4G33985	-1.29407	6.40103982802119e-08	AT4G33980	-1.77005	6.81868314319576e-06
AT5G53110	-4.12225	1.5023053142097e-16	AT5G53090	-1.26954	3.92242126472599e-06
AT4G09160	1.12265	6.29026682654818e-11	AT4G09150	0.72946	1.25809466794398e-10
AT4G16900	1.16585	7.73801154939317e-22	AT4G16890	2.55938	2.02741479868906e-44
AT3G06770	1.7527	3.03586626661738e-36	AT3G06750	2.39604	2.45514712667275e-103
AT5G23940	3.5579	4.63522810189601e-49	AT5G23910	1.14635	1.17981893571805e-06
AT3G17430	-0.30763	0.00673038558267232	AT3G17420	-2.56283	2.17855993834834e-101
AT1G13650	7.05977	2.83068299585813e-20	AT1G13635	-3.61353	1.52675174917209e-17
AT1G23060	-1.11301	0.00353190638567175	AT1G23030	0.603634	0.0138159711194554
AT4G04910	-0.577601	4.97832866191823e-09	AT4G04890	3.71555	2.38230583741627e-36
AT2G34660	-0.762732	0.0297161577082012	AT2G34640	2.77162	9.68297091642039e-52
AT5G13000	0.52573	0.0384692802884094	AT5G12970	-3.54154	7.74384335671615e-56
AT1G61120	6.32682	2.48202157742411e-06	AT1G61080	-5.05803	4.20739106982486e-14
AT3G04910	1.62926	4.15503710914667e-60	AT3G04850	-0.681978	0.000819388896397152
AT4G13820	1.38368	0.0249424961039855	AT4G13770	2.18126	3.31822667779865e-09
AT4G32790	0.309865	0.0354452571127243	AT4G32770	2.99263	7.14670261195954e-19
AT3G46400	-5.59772	2.67519618637992e-12	AT3G46370	5.91371	1.91642207923984e-21
AT1G05830	0.431578	0.0033282377500411	AT1G05790	0.707361	8.74545952211293e-10
AT3G11385	-6.55376	6.75041685557771e-20	AT3G11370	-5.60678	1.40498815679965e-18
AT1G55420	-4.58703	4.29335823796162e-41	AT1G55390	-2.989	1.96115367517886e-13
AT1G11350	3.0341	7.00852054935795e-71	AT1G11320	0.548953	0.0213769156975509
AT1G03080	-1.12717	3.01299459744814e-09	AT1G03060	-0.531658	0.00200253536972067
AT1G45207	1.04928	9.47391776707462e-05	AT1G45191	5.47788	1.85429646054449e-39
AT3G52535	0.707137	0.0446676800346006	AT3G52525	3.90659	1.35583195347222e-23
AT5G46510	0.703522	0.0235165605123907	AT5G46470	0.726949	0.00168750164222977
AT5G61740	4.50055	9.85425875934586e-14	AT5G61670	1.46539	1.09437960050878e-17
AT2G21400	-3.25923	1.73581170613081e-05	AT2G21380	1.47615	3.39453773664615e-10
AT4G25960	4.96418	8.69686277185249e-89	AT4G25880	-0.217684	0.0358622865777669
AT4G16900	1.16585	7.73801154939317e-22	AT4G16890	2.55938	2.02741479868906e-44
AT4G39900	1.35792	3.81112437315686e-16	AT4G39870	-0.342294	0.00739282016229418
AT1G60600	4.68511	2.08896480929712e-126	AT1G60590	7.08513	3.1823756235235e-48
AT3G55430	0.819198	3.96530732828091e-11	AT3G55410	-0.557267	1.59409648174245e-07
AT5G47070	1.7947	3.41414169000203e-17	AT5G47060	-1.04247	2.50550728407149e-06
AT4G01050	5.24059	0	AT4G01020	0.410132	0.000179935638804866
AT5G22860	1.26007	1.67869597362474e-06	AT5G22830	2.50735	8.39881832528843e-157
AT4G19410	0.470756	2.83772585178351e-05	AT4G19390	1.43769	5.67149825443992e-05
AT1G77750	-0.303668	0.00656880265776693	AT1G77740	0.438948	3.35061387768985e-07
AT2G29120	3.11009	8.84571001744571e-10	AT2G29090	5.60489	3.66061741036352e-23
AT1G03457	-0.808745	1.41526474090621e-06	AT1G03440	1.93441	3.13709174299411e-27
AT1G64990	-0.386508	0.000440063162146396	AT1G64960	0.488482	0.00482481975565305
AT4G28085	-0.888771	0.000326878814859991	AT4G28080	5.5523	2.59562893815667e-187
AT2G26980	1.21271	0.000107700310386799	AT2G26970	0.361682	0.00179867652083209
AT5G08560	-0.408205	4.61247103977029e-07	AT5G08520	1.32605	5.20903848709784e-14
AT5G17250	-0.375738	0.0129554737762298	AT5G17230	4.69416	1.09978644879735e-248
AT5G63160	2.04708	3.66137493503614e-05	AT5G63140	2.44667	8.83991226974682e-14
AT1G51820	1.48462	3.50273617468003e-07	AT1G51805	7.1917	1.37600524771529e-223
AT1G68230	-1.11739	1.36052658943961e-07	AT1G68185	0.351411	0.00780035942105662
AT5G41140	0.6569	1.72562469695061e-14	AT5G41100	0.496978	0.000383813208608797
AT2G40540	1.22262	3.75511516796204e-15	AT2G40490	3.58532	2.45041769074309e-117
AT3G46530	3.04631	3.50967758041196e-23	AT3G46500	-5.43276	7.3727664651329e-54
AT1G29920	8.1071	1.22636583542435e-77	AT1G29880	0.76228	3.41864923017016e-05
AT2G01190	-0.881761	0.00655092780172319	AT2G01140	-1.33676	4.24058277364321e-33
AT4G31210	0.94041	0.000130490994215669	AT4G31180	-0.378952	9.56297051863952e-06
AT2G35050	0.548118	0.000163176453645766	AT2G35010	-0.29815	0.0259714642513146
AT1G12260	-1.26319	3.14444797827291e-09	AT1G12230	0.632438	9.8287399534806e-07
AT3G10200	1.3638	1.67763609526925e-06	AT3G10160	1.39199	5.51602054523955e-28
AT1G47670	-1.61008	7.00796990346417e-08	AT1G47620	-5.87871	7.74665672094261e-12
AT1G67730	-0.5294	0.000236508699364736	AT1G67690	0.495067	0.00335934046323192
AT4G16990	7.82268	3.13637103124229e-138	AT4G16950	2.61975	7.22284784353196e-50
AT4G04910	-0.577601	4.97832866191823e-09	AT4G04870	-0.367807	0.0295481583482395
AT1G70770	-0.916916	1.1203080106352e-18	AT1G70730	0.507732	5.93208391851216e-06
AT3G20350	1.29316	1.18405457049026e-07	AT3G20300	2.5611	6.9368548099174e-35
AT3G21295	-0.493679	0.000331763465854009	AT3G21230	-1.88253	3.76207980676136e-21
AT1G33170	1.06979	4.46687560131066e-05	AT1G33110	1.05053	5.70673947032551e-06
AT3G08500	-0.766168	0.0384741908687929	AT3G07990	-0.872063	4.60767930101342e-12
AT1G60810	-0.896524	1.35592157818194e-28	AT1G60800	1.63703	3.56307710118211e-42
AT3G59420	1.72512	7.53119309471384e-15	AT3G59410	0.623349	7.84369318214983e-11
AT5G22310	1.01151	3.17435484028042e-05	AT5G22300	2.25654	4.54898515693054e-06
AT1G78080	-0.664623	0.003761541159186	AT1G78070	1.55925	0.00319549164743607
AT3G07420	-0.818202	3.17661294942257e-07	AT3G07400	0.818134	5.11456956587091e-09
AT1G55420	-4.58703	4.29335823796162e-41	AT1G55390	-2.989	1.96115367517886e-13
AT1G62430	0.586409	0.00947311554637318	AT1G62400	2.96225	7.2980831647997e-37
AT4G34260	1.00724	3.02256765904123e-16	AT4G34240	1.58819	1.53148552473681e-23
AT1G66980	7.38135	0	AT1G66970	6.69999	7.76316060686033e-215
AT1G66950	-5.02397	7.42142954142439e-14	AT1G66940	8.30084	2.67811604995356e-136
AT1G15290	3.524	1.28436183775593e-38	AT1G15240	0.392317	0.0165111911145267
AT1G11100	-3.1086	1.87450145300632e-75	AT1G11080	1.62374	7.344961267774e-10
AT5G46490	4.23768	5.82437180675689e-44	AT5G46470	0.726949	0.00168750164222977
AT1G71420	0.698191	0.0184410824506468	AT1G71400	-3.09908	1.22811713671761e-39
AT4G28720	-1.93821	1.90387967588197e-13	AT4G28710	-0.777249	1.52827762428202e-09
AT3G59700	-2.04227	7.62346965342177e-07	AT3G59660	-0.728301	1.57606043261776e-13
AT3G55130	5.86438	7.5614483398405e-129	AT3G55110	5.61368	5.11312067636934e-37
AT1G80460	-0.923269	8.45339903870325e-10	AT1G80420	1.16203	1.70225882084471e-16
AT2G02080	3.21409	5.24490371773112e-175	AT2G02070	3.40337	1.32456077584131e-70
AT5G45095	-2.10859	0.000162032804883707	AT5G45090	-4.4407	3.07108583174609e-07
AT4G28270	0.384114	0.00993814743157441	AT4G28250	-1.25381	0.00103621626882276
AT4G13340	1.17358	0.010675626990055	AT4G13310	-5.84363	7.15377954823527e-18
AT1G48260	1.69354	1.75860235568086e-13	AT1G48210	-0.755455	0.000533152157526636
AT1G51720	0.446318	0.000783733428245492	AT1G51690	0.453366	1.36147890750461e-06
AT2G41730	1.67254	0.0219382130623154	AT2G41705	0.287177	0.0375635725147218
AT1G10760	1.75451	2.63900408842521e-21	AT1G10740	1.35579	6.71663898253003e-19
AT4G39350	0.394185	0.00198561549001158	AT4G39330	4.99329	5.7867387822265e-216
AT3G24360	-1.3546	0.00430822178253058	AT3G24320	1.03299	9.26596668973657e-05
AT5G51230	0.518097	0.000666291908315234	AT5G51200	0.632463	0.0121483054205893
AT1G63750	2.68573	2.21561601326895e-34	AT1G63720	-1.66488	7.15477314628196e-08
AT2G41680	3.23124	6.01338220619478e-199	AT2G41650	-0.508324	0.0399642235741267
AT5G46470	0.726949	0.00168750164222977	AT5G46410	-0.937983	3.02444636576268e-05
AT5G07690	5.35957	7.01176091805782e-32	AT5G07670	0.889043	9.35450619884214e-09
AT4G25790	-5.30483	1.66907240516013e-26	AT4G25740	0.378659	0.0014512751283507
AT1G74040	1.64601	1.10106238382655e-24	AT1G73980	0.249538	0.0276910164499342
AT3G06630	-2.36349	1.083283460225e-13	AT3G06550	0.209438	0.00839523179112323
AT1G52150	-0.362029	0.026457534638292	AT1G52080	-1.00311	4.85257242766592e-17
AT3G46370	5.91371	1.91642207923984e-21	AT3G46330	-6.21046	3.45338698747857e-31
AT2G40490	3.58532	2.45041769074309e-117	AT2G40435	6.7282	4.50723079565889e-20
AT1G28960	-0.401687	0.0435338517766776	AT1G28710	1.55002	3.01336743681234e-07
AT1G74910	1.46467	1.3736216721811e-31	AT1G74810	3.63025	3.11236906844807e-05
AT3G17850	0.538328	6.06071943954033e-06	AT3G17810	-1.51751	5.08801440911128e-35
AT1G57600	-0.523021	2.34009095895288e-05	AT1G57570	-4.89304	3.36847505939349e-27
AT3G54830	4.78715	3.78136419416825e-183	AT3G54820	1.43294	9.78770576196373e-06
AT5G53130	1.03822	1.3178191191047e-13	AT5G53090	-1.26954	3.92242126472599e-06
AT2G29670	5.03881	9.41713087699423e-104	AT2G29650	5.05488	4.10718409300393e-138
AT1G13040	-0.54745	0.0361487755970943	AT1G12990	1.06327	8.307372301599e-08
AT3G47050	-6.42586	8.52904847159831e-17	AT3G47000	0.423868	2.08464955472606e-07
AT5G39500	-0.333042	0.00279255120115366	AT5G39450	-0.678192	0.000294754872262925
AT1G33750	-5.24696	1.27185664506085e-11	AT1G33720	8.50794	6.02368415030951e-16
AT3G62730	-2.93643	1.43808732039627e-06	AT3G62700	0.666003	6.68589162291557e-09
AT4G32551	0.346599	0.0291606513104471	AT4G32520	0.363447	6.45702174824659e-06
AT1G22400	1.07901	2.05875454788727e-09	AT1G22370	2.03553	1.55621272978971e-08
AT3G14650	2.04903	7.56109087503768e-66	AT3G14570	-1.40591	1.01429426335341e-06
AT1G63740	-0.361071	0.0109972440689442	AT1G63730	-1.29164	2.68921799870403e-22
AT3G10525	1.31548	8.6629800784315e-06	AT3G10520	3.41852	6.72732033862059e-38
AT1G03590	0.91821	1.0432908563445e-05	AT1G03560	0.419062	0.0394030208987599
AT1G06390	0.554807	6.88707206393669e-14	AT1G06360	8.23013	3.91581144654343e-34
AT3G24360	-1.3546	0.00430822178253058	AT3G24340	1.08604	0.00134582675330011
AT4G27370	1.78814	1.21120593084388e-06	AT4G27340	2.26192	5.09440029827104e-40
AT2G15080	5.5221	1.07322257118287e-113	AT2G15042	5.95142	1.05205596153275e-11
AT5G52230	0.456284	3.25155441070056e-05	AT5G52170	-3.44593	1.66354752719832e-09
AT5G56450	0.655662	0.00323779481615589	AT5G56350	-1.23117	3.13033986397981e-15
AT4G04750	1.41137	3.97071198417727e-05	AT4G04740	-0.228766	0.00663839019299767
AT1G65120	-1.17329	0.00141584743954527	AT1G65080	-0.36606	0.0432899566510181
AT3G60210	1.12489	1.08073511239085e-19	AT3G60200	-0.266166	0.0313550948493939
AT2G26190	0.766566	0.00144838917280388	AT2G26170	-1.17604	5.2938284024127e-14
AT1G05010	2.45347	2.87914354149867e-22	AT1G05000	-1.93148	4.58073704764297e-07
AT2G15090	5.50304	2.31383514899471e-117	AT2G15080	5.5221	1.07322257118287e-113
AT2G29200	-0.965202	1.09116156298038e-06	AT2G29170	6.5748	1.02011343265358e-29
AT3G10525	1.31548	8.6629800784315e-06	AT3G10470	-3.08412	3.7630381179685e-13
AT1G67890	0.521039	0.00208256711795187	AT1G67870	0.708949	0.00969354006026213
AT1G66980	7.38135	0	AT1G66950	-5.02397	7.42142954142439e-14
AT5G52930	5.0374	5.66947904423758e-13	AT5G52910	1.27553	0.00042239266383781
AT3G10010	2.37566	7.90959887749525e-66	AT3G09980	0.581524	1.42561274107975e-06
AT1G14880	5.94856	3.31213888045262e-06	AT1G14850	-0.443447	2.73625812418124e-05
AT5G45095	-2.10859	0.000162032804883707	AT5G45050	0.404649	0.0218090200435848
AT5G24940	3.80629	3.60153229417742e-25	AT5G24900	-4.01128	9.67485640577028e-12
AT4G19610	0.396573	0.0474454210290354	AT4G19560	1.45137	1.93900750115704e-06
AT3G10290	2.25476	2.8034985975261e-11	AT3G10270	1.65913	5.77512349100378e-14
AT1G18750	1.77687	1.58049005325987e-21	AT1G18700	0.316851	0.00123401318397213
AT5G46510	0.703522	0.0235165605123907	AT5G46470	0.726949	0.00168750164222977
AT1G15290	3.524	1.28436183775593e-38	AT1G15280	0.240706	0.00666051823627552
AT5G53760	-1.10126	0.00247853433120843	AT5G53660	6.02308	1.42447830296929e-09
AT3G19480	5.61987	2.61618269703431e-173	AT3G19430	-5.38586	6.92980493069638e-62
AT1G58602	6.48534	3.72491263006463e-200	AT1G58590	1.63245	0.000865226109155758
AT5G22794	0.457429	0.0238967923198563	AT5G22780	-0.220304	0.0392847883573017
AT1G62110	-0.558932	0.000403867302004935	AT1G62020	-0.518815	1.25755673613423e-10
AT5G08560	-0.408205	4.61247103977029e-07	AT5G08440	0.404692	0.0103246946606493
AT4G33810	-0.424439	0.0077331930417296	AT4G33760	1.74587	2.8708199443932e-19
AT1G63750	2.68573	2.21561601326895e-34	AT1G63700	0.430874	0.000901994317630334
AT5G04160	0.373312	0.0113282440576609	AT5G04140	7.40463	1.23797485802098e-227
AT4G24450	2.42363	3.29259130209588e-26	AT4G24390	0.58108	1.97883992617524e-06
AT2G39880	1.19157	0.000128843435463368	AT2G39870	0.894583	4.5515546238722e-07
AT2G29340	1.29904	5.04883795481463e-25	AT2G29320	0.990224	0.000675468637501596
AT2G29130	-3.53502	1.71514593703684e-11	AT2G29120	3.11009	8.84571001744571e-10
AT4G33780	-0.957685	2.59012499920394e-20	AT4G33770	-0.867048	0.00478647509271968
AT1G63880	4.06168	6.1094318667036e-97	AT1G63860	4.28153	3.1403002378907e-41
AT1G65900	1.19134	8.44702868720057e-08	AT1G65870	6.26526	3.32049806423222e-14
AT3G58650	0.910126	0.000817235290033942	AT3G58620	0.533627	6.54394140968765e-05
AT4G24670	1.53356	8.07522450297386e-16	AT4G24660	4.22583	9.38124723983767e-61
AT1G68910	0.425413	1.05418825888771e-05	AT1G68890	3.79627	8.78283016139402e-36
AT1G65570	-5.7582	5.63977158133075e-18	AT1G65470	0.404219	0.0491181612603162
AT3G05340	1.07699	1.97133437579868e-07	AT3G05330	1.00152	1.05512620305517e-05
AT4G23300	8.62841	8.92301190476683e-122	AT4G23290	8.61027	8.83990746647732e-156
AT1G74260	0.306897	0.000399808642394865	AT1G74170	0.825682	0.000218813149538922
AT3G56140	2.01248	9.89384426765794e-131	AT3G56110	-0.451434	0.000275726664026093
AT3G18670	-0.682006	0.0481378868812429	AT3G18660	-1.19	0.0295611232925971
AT2G18900	-0.427154	0.00900267231076403	AT2G18890	1.30697	5.37311075244516e-06
AT1G30440	0.290686	0.0260095289039154	AT1G30420	-2.00563	2.07427282472961e-14
AT4G23030	2.60819	1.20671150715044e-11	AT4G23020	3.10624	1.88848320726969e-34
AT2G23000	3.85127	3.6437889814708e-25	AT2G22990	4.3584	9.62373442943335e-23
AT1G76620	3.33882	1.06044789403333e-17	AT1G76610	4.21927	1.40202965713421e-17
AT3G07360	0.838156	6.21709237879104e-17	AT3G07350	2.21583	9.83663853029963e-61
AT1G14850	-0.443447	2.73625812418124e-05	AT1G14790	-0.658531	0.0238154728206834
AT5G22130	-0.658388	2.16416046807839e-07	AT5G22100	-0.391521	0.00379039016930247
AT1G14300	-0.389645	0.0251401269824865	AT1G14280	5.45426	1.5121104253871e-153
AT2G28990	-5.99013	2.00176333203294e-41	AT2G28950	3.42492	2.77060406899097e-61
AT4G13590	1.48219	3.37459181401426e-19	AT4G13550	1.99135	8.05319993806548e-47
AT4G00740	-0.564155	5.22304468889301e-05	AT4G00730	2.00677	1.17676749556107e-07
AT2G32430	-1.78818	8.32511901481043e-18	AT2G32415	0.50925	0.00502087119836854
AT1G65900	1.19134	8.44702868720057e-08	AT1G65860	4.40194	6.14080108865976e-123
AT3G02150	5.14972	2.05157097936967e-73	AT3G02130	0.762453	0.000221726077496109
AT5G43310	0.770696	0.000300566112449552	AT5G43270	1.3807	6.03500575113573e-23
AT1G56570	0.679804	0.00137890463678545	AT1G56510	7.00144	6.28193826751109e-75
AT3G14810	1.69819	3.02762312348935e-08	AT3G14750	0.644938	0.000346327255141733
AT4G24840	-0.43712	0.00109213379115273	AT4G24800	1.0489	2.59970936206385e-11
AT2G45460	0.440571	0.000466929547027478	AT2G45420	-2.78096	7.20867446078499e-08
AT1G24360	0.375082	8.78317528420911e-05	AT1G24320	-5.80042	1.71926741900009e-34
AT2G29940	5.6035	1.67481282677257e-69	AT2G29890	0.527832	0.0289226347822074
AT5G50110	1.58874	1.16603888469373e-26	AT5G50020	0.510759	2.60830508523571e-05
AT3G06640	2.2149	2.99425924385214e-09	AT3G06630	-2.36349	1.083283460225e-13
AT2G20960	1.04561	5.71984865613348e-11	AT2G20950	0.477487	0.00239962224020593
AT3G46100	2.06369	2.79908820529886e-26	AT3G46090	4.10216	5.93001934883926e-13
AT5G47810	-0.425624	0.00191779679310066	AT5G47780	0.732234	1.88081927343069e-05
AT3G18010	7.29581	2.27089192242883e-20	AT3G17970	0.841072	8.94531187525329e-24
AT3G02170	1.94949	9.45743249890586e-12	AT3G02130	0.762453	0.000221726077496109
AT3G14980	0.920684	4.57469256770054e-06	AT3G14940	-4.67094	8.5543656372517e-54
AT5G04220	1.24991	7.51143612184431e-06	AT5G04140	7.40463	1.23797485802098e-227
AT3G66658	-0.586835	4.12297179493997e-10	AT3G06640	2.2149	2.99425924385214e-09
AT3G58460	-0.297255	0.00713652834295479	AT3G58430	1.70558	6.44156960515832e-13
AT5G06780	0.325538	0.00155781019935171	AT5G06740	-5.21082	1.40661301384844e-28
AT5G03620	3.15474	5.63927144827522e-14	AT5G03555	0.360242	0.0307555639470539
AT2G37630	1.87381	1.46213665978394e-80	AT2G37600	0.240594	0.0194517458899907
AT4G25490	4.38601	3.69754105474462e-09	AT4G25470	4.27794	4.85560645253009e-11
AT2G31070	3.71341	2.38652782812119e-60	AT2G31060	-0.518765	0.0323772801498846
AT4G27310	3.95534	3.91480909912275e-133	AT4G27300	5.23805	1.80243843901158e-201
AT2G46620	-1.57184	5.72886505783676e-05	AT2G46590	-0.554354	0.000323971824606547
AT1G14850	-0.443447	2.73625812418124e-05	AT1G14840	3.16594	1.73940874458536e-29
AT3G19830	1.06121	6.24530461089223e-12	AT3G19820	0.374445	0.000346964420273692
AT3G46610	2.08264	9.32452527009676e-41	AT3G46590	0.942069	2.34879034267088e-07
AT5G45620	-0.239955	0.00925195014343829	AT5G45540	2.27524	5.26999271272829e-08
AT5G21222	3.79446	6.5736554884482e-225	AT5G21170	0.973285	6.63600266263914e-05
AT3G44160	1.00575	6.00992433854231e-23	AT3G44120	-3.13195	5.25814986110201e-07
AT5G63810	1.19253	1.73869103715638e-07	AT5G63800	1.53535	9.80135846503842e-28
AT2G29200	-0.965202	1.09116156298038e-06	AT2G29170	6.5748	1.02011343265358e-29
AT1G10760	1.75451	2.63900408842521e-21	AT1G10750	-1.01297	1.07733954297208e-08
AT5G62090	0.884246	4.22197164148177e-12	AT5G62050	-0.582028	1.49482316808008e-06
AT2G25737	0.554989	0.000616636498988423	AT2G25730	-0.499285	3.9767340778697e-05
AT5G19100	-3.16721	4.1530780272216e-26	AT5G19090	0.84517	3.2232227181392e-12
AT3G47760	-5.23565	3.72936009656541e-08	AT3G47730	-1.83988	9.76945567880061e-12
AT5G61070	4.71525	6.86628408876332e-13	AT5G61030	-0.605813	0.0452733711837778
AT2G42840	3.0506	3.16901581983888e-18	AT2G42800	5.2475	2.00018555552014e-45
AT2G22780	-0.798951	2.10140003868917e-06	AT2G22720	0.177215	0.041801920185422
AT2G35340	0.977786	0.000221385974452143	AT2G35260	5.77801	9.99351019790634e-223
AT1G21660	-0.186523	0.0310326304165781	AT1G21640	1.43177	1.17478973403255e-64
AT5G02940	5.16694	2.17110735628937e-98	AT5G02880	-0.535391	0.00192692593564208
AT5G11570	-3.97153	2.39788193043395e-26	AT5G11530	0.341802	0.00647053452485866
AT3G47040	-6.1658	1.73040010608948e-20	AT3G46970	2.87743	7.33551196859014e-43
AT1G26570	2.64413	1.35847234950145e-38	AT1G26460	-0.389982	0.0027132005567949
AT4G19390	1.43769	5.67149825443992e-05	AT4G19380	4.32743	1.1802829061344e-28
AT5G13650	2.21386	1.34727144043564e-58	AT5G13640	0.48059	0.00109485695334321
AT3G06640	2.2149	2.99425924385214e-09	AT3G06620	-0.383701	0.00341491988438439
AT3G06770	1.7527	3.03586626661738e-36	AT3G06750	2.39604	2.45514712667275e-103
AT3G04220	-3.36061	1.10243113269773e-07	AT3G04160	0.483896	0.00243206365287192
AT2G32540	4.39237	9.39773524529834e-44	AT2G32530	4.52586	1.33096331551956e-66
AT5G13640	0.48059	0.00109485695334321	AT5G13630	6.54019	5.54735578899884e-181
AT3G02890	0.913694	0.0014785211337768	AT3G02885	-3.6849	6.03754608198881e-08
AT1G66970	6.69999	7.76316060686033e-215	AT1G66940	8.30084	2.67811604995356e-136
AT4G32320	2.11495	1.59642291274109e-17	AT4G32295	1.00798	5.45436189978871e-05
AT4G25470	4.27794	4.85560645253009e-11	AT4G25450	1.94224	6.05140767097441e-33
AT1G26580	0.243942	0.0245158020147256	AT1G26560	3.70255	1.95086665782083e-26
AT3G19553	0.593237	0.036007248368409	AT3G19540	0.608867	6.85300280518074e-11
AT3G06630	-2.36349	1.083283460225e-13	AT3G06620	-0.383701	0.00341491988438439
AT1G28340	0.396785	0.000323162001769014	AT1G28330	-1.17694	0.000427854641898448
AT2G43520	7.79011	7.9545845751698e-35	AT2G43490	-0.716703	0.00140610453235605
AT1G11350	3.0341	7.00852054935795e-71	AT1G11310	0.536157	0.000281950134484057
AT1G30440	0.290686	0.0260095289039154	AT1G30410	0.855141	0.00415610894190424
AT1G24400	5.83633	1.09483000486597e-61	AT1G24340	0.359846	0.0110818852321153
AT3G48290	2.81759	0.000206210726979497	AT3G48260	-1.57629	1.85857231501173e-07
AT4G00420	0.364304	0.00320470535861164	AT4G00380	1.99677	1.69968031178904e-19
AT1G14850	-0.443447	2.73625812418124e-05	AT1G14840	3.16594	1.73940874458536e-29
AT1G70580	1.01613	9.74785097607289e-05	AT1G70560	0.767303	0.00696800558238326
AT3G11390	-2.11196	7.47385255465368e-05	AT3G11370	-5.60678	1.40498815679965e-18
AT1G09070	1.80462	1.27102885899863e-08	AT1G09060	1.12823	1.05071538084666e-13
AT2G26650	-2.94639	2.21548472031532e-69	AT2G26640	0.654761	0.0130898577248931
AT2G23610	-0.379006	0.000865226109155758	AT2G23600	1.66039	3.58937328742349e-21
AT1G24460	-0.187352	0.0049249571388458	AT1G24400	5.83633	1.09483000486597e-61
AT3G47800	1.63106	1.71939097050831e-17	AT3G47790	-5.48692	5.99024878662541e-40
AT1G49740	0.404323	0.02006760076966	AT1G49720	-1.74415	2.36387562722028e-16
AT1G58602	6.48534	3.72491263006463e-200	AT1G58520	0.9433	0.00984720967903111
AT5G50020	0.510759	2.60830508523571e-05	AT5G50000	0.571754	7.77847217310232e-07
AT3G04290	8.02325	1.2463442328205e-237	AT3G04260	3.37203	6.2980048405261e-77
AT2G03780	0.928888	7.50425515666294e-14	AT2G03710	3.44769	5.29672529679949e-32
AT1G63770	0.256064	0.0481110763202539	AT1G63700	0.430874	0.000901994317630334
AT4G01240	-5.52331	1.15712649317767e-30	AT4G01210	0.704944	2.29206717705595e-05
AT1G30450	-0.416249	0.000106608465076106	AT1G30410	0.855141	0.00415610894190424
AT4G19510	1.17714	1.10960855781786e-18	AT4G19490	-0.243274	0.0277870366047397
AT5G19660	-0.29122	0.00828337450458761	AT5G19580	4.20108	8.79603068317336e-31
AT5G04230	5.37806	2.09518392930628e-152	AT5G04140	7.40463	1.23797485802098e-227
AT4G02680	-0.2936	0.00629145216543143	AT4G02640	-0.513789	3.71597645655688e-06
AT1G15240	0.392317	0.0165111911145267	AT1G15210	-5.23768	7.77927335712567e-76
AT5G12370	0.480932	2.20074806251269e-06	AT5G12330	-3.10759	5.92725721509833e-08
AT1G67600	1.46783	3.59380535755792e-12	AT1G67590	1.11672	0.00107920461708454
AT4G13720	0.544285	0.000419718396494072	AT4G13710	-0.696008	0.0238159011530994
AT1G56700	-1.24151	1.46700053578855e-23	AT1G56680	-5.08277	7.52586499890287e-05
AT1G20200	-0.252284	0.00221682918570289	AT1G20160	-2.79594	3.25441389252238e-22
AT4G10160	6.47848	2.64659111910295e-11	AT4G10140	-0.446035	0.000360075977279708
AT1G72200	-3.78158	4.71779580767948e-29	AT1G72180	1.14363	3.6296947536974e-06
AT2G30590	0.933023	2.15934554609426e-08	AT2G30580	0.325812	0.0338882014520257
AT2G36390	0.883062	2.01584610896605e-08	AT2G36370	-0.342479	0.00904399370178353
AT4G04885	0.353308	0.00138849616853767	AT4G04870	-0.367807	0.0295481583482395
AT3G14220	1.14983	1.69736067097715e-26	AT3G14205	0.630687	3.08883129352467e-06
AT2G40475	1.35422	1.5430765525009e-25	AT2G40435	6.7282	4.50723079565889e-20
AT4G14510	1.51736	5.98786072499398e-26	AT4G14455	-0.684852	6.8612714546234e-09
AT1G70900	0.601008	0.000305011351230392	AT1G70820	7.33724	3.30083904715404e-150
AT5G12980	0.495514	0.00264275280123503	AT5G12940	-1.55069	1.40545892485667e-09
AT3G28580	-3.46285	3.0544368572738e-14	AT3G28540	3.54184	7.11101545248526e-38
AT4G02710	-1.90022	8.09204782836348e-13	AT4G02660	-1.45544	0.00144841635090342
AT3G04210	8.79886	1.51657857418374e-68	AT3G04160	0.483896	0.00243206365287192
AT3G48310	9.15888	2.91192112995899e-53	AT3G48260	-1.57629	1.85857231501173e-07
AT4G14480	6.84256	4.24128379499826e-84	AT4G14455	-0.684852	6.8612714546234e-09
AT3G10500	-3.05035	1.67206982609385e-51	AT3G10470	-3.08412	3.7630381179685e-13
AT5G46490	4.23768	5.82437180675689e-44	AT5G46470	0.726949	0.00168750164222977
AT4G19390	1.43769	5.67149825443992e-05	AT4G19380	4.32743	1.1802829061344e-28
AT1G17220	3.97064	8.46446615239655e-180	AT1G17200	4.54247	4.68045624108101e-145
AT2G37585	0.600355	9.93739816108832e-08	AT2G37500	0.867881	6.83472968790483e-13
AT4G04940	-0.948043	0.000240595752171132	AT4G04920	-0.657397	2.9838677288452e-12
AT1G10600	1.11218	4.2040762638563e-12	AT1G10570	0.561792	0.00042896983569907
AT2G21650	3.86959	4.42652366235475e-10	AT2G21640	1.58261	7.44162903717419e-08
AT5G49680	-3.66699	1.46694606284317e-62	AT5G49650	0.339205	0.000291923283847592
AT1G12440	0.881687	0.0275470096552239	AT1G12430	0.563099	0.00229138797202372
AT1G30450	-0.416249	0.000106608465076106	AT1G30420	-2.00563	2.07427282472961e-14
AT5G40060	2.2706	2.80021801743581e-41	AT5G40030	-1.71475	2.54080510122274e-07
AT1G18620	3.08494	2.08421005418589e-40	AT1G18610	0.744233	5.68135848973648e-08
AT3G10290	2.25476	2.8034985975261e-11	AT3G10270	1.65913	5.77512349100378e-14
AT4G23230	6.17612	7.96154170000915e-13	AT4G23220	7.5655	2.52284247056329e-49
AT4G09160	1.12265	6.29026682654818e-11	AT4G09150	0.72946	1.25809466794398e-10
AT4G15440	3.73177	8.00632105153862e-12	AT4G15430	1.08144	5.3853644114337e-06
AT5G42690	-2.35192	1.11057037032742e-56	AT5G42670	0.695038	4.64675031791423e-07
AT1G71050	3.42771	1.28165277695777e-09	AT1G71040	1.33717	3.99180606941218e-16
AT3G55160	-0.555484	0.0488099497378342	AT3G55130	5.86438	7.5614483398405e-129
AT3G08670	0.481867	0.032308902403499	AT3G08650	-0.368473	0.0107411058194537
AT1G73860	-3.81201	1.94631516690857e-28	AT1G73830	5.37136	1.08370993379292e-44
AT1G22360	-1.00454	1.50937985766158e-05	AT1G22330	2.06536	1.67583498360995e-17
AT3G54830	4.78715	3.78136419416825e-183	AT3G54820	1.43294	9.78770576196373e-06
AT5G22860	1.26007	1.67869597362474e-06	AT5G22850	-0.466751	0.0385623730276009
AT4G36550	0.772752	0.000642847522190185	AT4G36530	3.54448	2.61886805091583e-80
AT1G47330	-0.267311	0.0180404720268932	AT1G47290	-0.976157	1.49663509234737e-26
AT2G14610	6.01671	1.19819960226364e-05	AT2G14580	8.63592	6.70427045562968e-16
AT1G10690	-0.593447	0.0340997480125481	AT1G10682	-1.9501	3.3425524012238e-05
AT2G18990	0.260693	0.0298322929636785	AT2G18950	1.28633	0.000560722896522331
AT4G23040	0.578168	1.72149288043065e-05	AT4G23020	3.10624	1.88848320726969e-34
AT3G45280	-1.63918	0.000620010965404898	AT3G45260	3.69504	1.6766544015374e-162
AT1G56550	-4.21576	6.53366138755914e-15	AT1G56500	4.0111	3.33265162847515e-131
AT2G30040	1.48474	0.000592949444639534	AT2G30020	1.1557	0.023155252471405
AT2G02480	-1.07941	3.0990430632901e-05	AT2G02450	5.16484	3.78180095168914e-101
AT4G25830	1.84222	1.40481035853222e-08	AT4G25790	-5.30483	1.66907240516013e-26
AT2G38710	-0.636233	1.03893107809079e-08	AT2G38680	0.426852	0.00836591630044432
AT4G30080	-1.1114	7.56173584933721e-17	AT4G30060	-1.54079	4.23521288997147e-37
AT1G49500	1.66427	0.000238365308731383	AT1G49475	-2.49528	5.3093142635555e-06
AT1G51690	0.453366	1.36147890750461e-06	AT1G51650	-1.01411	3.8585338081539e-26
AT1G64440	-0.853436	7.62079906473841e-09	AT1G64390	-0.958468	0.000267835783134138
AT5G23440	2.0871	2.5670038207467e-42	AT5G23420	0.64351	0.00335503411566566
AT1G35350	2.34229	7.0147764491327e-17	AT1G35330	-5.47954	2.10885059445658e-11
AT5G02940	5.16694	2.17110735628937e-98	AT5G02880	-0.535391	0.00192692593564208
AT1G12500	0.501132	0.000323971824606547	AT1G12460	1.75552	4.35390300066116e-35
AT2G26250	3.47375	5.1211112910406e-52	AT2G26190	0.766566	0.00144838917280388
AT4G14500	0.86978	2.92941803205681e-24	AT4G14455	-0.684852	6.8612714546234e-09
AT1G30530	4.35822	4.30512545078182e-83	AT1G30490	0.566815	0.000978003158355213
AT5G11100	-1.42076	9.05481111206082e-13	AT5G11060	4.13071	3.66099704448496e-90
AT4G28760	1.37331	2.15720315102243e-33	AT4G28720	-1.93821	1.90387967588197e-13
AT5G58930	0.47653	1.65537801696963e-06	AT5G58870	1.22119	3.92503639421078e-12
AT3G44630	2.96012	1.43413247995513e-10	AT3G44610	2.21838	6.97740266405013e-50
AT2G47460	-4.13586	4.33256928992693e-26	AT2G47440	1.45012	5.13548224760159e-09
AT5G63660	-5.18116	6.30880116009573e-09	AT5G63630	0.842088	2.30794123204508e-08
AT1G62320	-5.42344	3.398678914719e-39	AT1G62300	-1.02267	0.00049359713473465
AT5G24090	-5.03774	4.2240022199502e-40	AT5G24060	1.64676	3.01079145013583e-41
AT5G49360	3.23665	7.09395057975688e-28	AT5G49330	4.79075	6.98338253609032e-16
AT3G27240	-1.15886	3.71597464999668e-72	AT3G27190	-2.68012	2.44276558540028e-49
AT3G02890	0.913694	0.0014785211337768	AT3G02875	-1.11637	2.69118780518777e-07
AT5G54710	3.9504	8.51028127379023e-33	AT5G54670	-1.03332	0.00158804730080323
AT2G39300	-2.87947	1.60242295138437e-38	AT2G39280	0.493718	0.0433228398483379
AT1G26970	-5.42308	3.59385611602117e-19	AT1G26940	-0.813956	5.60026010080776e-07
AT1G03080	-1.12717	3.01299459744814e-09	AT1G03060	-0.531658	0.00200253536972067
AT1G61490	-0.578744	0.0422435758898071	AT1G61430	0.528589	0.00571753749090789
AT3G55450	-0.783072	0.000777181538916415	AT3G55400	1.81305	1.47917515406621e-24
AT1G68825	-4.348	1.30294566908087e-22	AT1G68810	-0.652097	0.0410063428460085
AT3G23470	-5.87001	8.46119185514782e-20	AT3G23430	-3.75841	5.00861466442379e-78
AT1G05805	0.921817	8.02116810180438e-17	AT1G05790	0.707361	8.74545952211293e-10
AT4G32470	-0.465436	0.000413198275474368	AT4G32440	-0.42127	0.00821848306863819
AT3G50060	2.8905	8.91083303508546e-33	AT3G50010	-2.78098	2.51749028547261e-11
AT1G55360	0.757259	3.07015127594359e-08	AT1G55320	-1.72746	1.21859811986794e-07
AT3G18160	0.502486	0.0129573937238878	AT3G18090	1.5504	4.7943631975041e-14
AT4G20050	-0.93369	0.0201718439446555	AT4G19980	-4.87941	3.69385192480362e-13
AT3G62010	0.675895	6.2408909506448e-08	AT3G61970	1.84946	0.0185541168873244
AT4G19520	3.09599	1.18530466429375e-17	AT4G19490	-0.243274	0.0277870366047397
AT4G19600	0.264024	0.0232894628732609	AT4G19530	6.51413	2.30996843186456e-147
AT5G62680	-1.49446	7.91166944209882e-18	AT5G62630	-0.68997	0.00211751773309439
AT4G00730	2.00677	1.17676749556107e-07	AT4G00700	-4.9156	5.21504240089638e-29
AT1G05830	0.431578	0.0033282377500411	AT1G05790	0.707361	8.74545952211293e-10
AT2G47800	-2.44125	2.93152342044696e-25	AT2G47750	5.54838	2.11318934693297e-37
AT1G24330	1.32731	0.0040864223661873	AT1G24260	2.72448	0.00180937096708643
AT2G20670	3.60519	2.72363845349396e-27	AT2G20650	-0.825167	3.49892414376821e-12
AT5G40840	-1.60344	1.78100756426502e-17	AT5G40820	-1.00033	0.000186783473135832
AT1G56550	-4.21576	6.53366138755914e-15	AT1G56510	7.00144	6.28193826751109e-75
AT5G18460	1.78591	3.16630144374071e-56	AT5G18440	0.736758	0.000141769259402921
AT3G57800	3.34096	2.40216268793138e-62	AT3G57780	1.57301	9.42252811078709e-12
AT3G08505	1.0038	3.41133001931951e-07	AT3G08030	0.683379	0.00900147838413007
AT3G49290	1.60711	3.29316421667203e-21	AT3G49260	8.03794	1.08164056107214e-69
AT3G63460	-0.369749	0.0111454643730967	AT3G63420	0.748802	1.19295161697057e-12
AT2G29630	3.53512	3.93327578176328e-100	AT2G29620	-4.71542	4.51363546488392e-64
AT2G35060	1.73327	5.64965451699007e-42	AT2G35020	0.50351	0.000680034570699849
AT5G11420	4.54084	2.29914519788195e-41	AT5G11390	-0.603867	5.0513806519966e-05
AT1G56230	-1.24321	5.23107704767873e-49	AT1G56220	1.26833	5.17013207963731e-09
AT3G04980	0.651703	0.00244336124800012	AT3G04970	-0.374004	0.00215866430707331
AT3G06890	-1.35938	5.13226425162304e-05	AT3G06880	8.11822	7.78869697762081e-176
AT5G11180	-5.15136	2.09777052581074e-07	AT5G11110	-1.94962	1.25488448542182e-32
AT4G23230	6.17612	7.96154170000915e-13	AT4G23220	7.5655	2.52284247056329e-49
AT5G56860	6.97221	1.13116378721401e-142	AT5G56850	7.39126	1.11110431474004e-92
AT3G07660	-0.529154	5.40823403205944e-05	AT3G07650	-1.31368	0.000219101904260713
AT5G40840	-1.60344	1.78100756426502e-17	AT5G40820	-1.00033	0.000186783473135832
AT5G45060	1.15985	1.05861556193097e-11	AT5G45020	0.726241	3.18632436238031e-06
AT3G21630	-0.8601	0.0009012183326925	AT3G21600	-1.10812	6.77236714692048e-08
AT3G53240	0.616031	5.54146930180461e-06	AT3G53230	-2.48445	4.22292225386539e-54
AT4G24620	-0.536178	2.0679164874982e-09	AT4G24580	-2.56352	2.25871611550645e-07
AT3G13800	0.533488	2.93784241003191e-07	AT3G13790	-3.06822	2.53613425618506e-11
AT1G26440	-1.71436	1.70715889658813e-26	AT1G26380	-2.36702	0.000635177729459976
AT1G49750	5.70623	7.766924372366e-158	AT1G49740	0.404323	0.02006760076966
AT5G18700	0.988833	0.000141041846594824	AT5G18690	-1.35906	4.58137762979087e-20
AT2G26010	6.63489	1.00174031299929e-08	AT2G25980	-5.3639	3.03703968290071e-17
AT3G01310	0.781373	1.04686804885492e-19	AT3G01280	-0.835207	2.24919883535466e-24
AT2G17060	-3.88985	1.13505961495567e-14	AT2G17050	-3.20113	7.70293225548829e-19
AT5G18820	0.994294	2.51169459482556e-05	AT5G18770	0.517433	0.000788489880900868
AT1G52160	-0.674356	0.000108220828337128	AT1G52150	-0.362029	0.026457534638292
AT3G14940	-4.67094	8.5543656372517e-54	AT3G14930	3.85715	2.75438893526258e-144
AT5G59570	-1.93154	3.92236067502942e-05	AT5G59560	-0.479326	0.000125186822442885
AT4G04750	1.41137	3.97071198417727e-05	AT4G04740	-0.228766	0.00663839019299767
AT1G56010	-2.12373	1.9755479851187e-14	AT1G55980	-1.54586	0.000927593281867691
AT4G16890	2.55938	2.02741479868906e-44	AT4G16860	3.98441	5.62444500461666e-89
AT3G60720	-1.06603	0.00327738899654147	AT3G60670	1.98616	1.65953747741908e-05
AT2G46720	6.0217	8.05324776222441e-40	AT2G46710	1.87498	4.31034578575615e-38
AT3G05410	2.47571	1.61718570855907e-75	AT3G05400	1.40435	0.000382966993800568
AT3G54820	1.43294	9.78770576196373e-06	AT3G54790	0.415809	0.00388347860290056
AT5G19090	0.84517	3.2232227181392e-12	AT5G19080	-0.550127	0.0309482534941989
AT5G46880	7.92495	2.53171927443725e-62	AT5G46870	-0.88009	0.00527238697175738
AT4G35250	4.92444	7.52037188927852e-215	AT4G35240	0.773696	1.15460813013814e-11
AT1G78460	3.5256	5.33730380572816e-44	AT1G78420	-0.511014	0.000103576082782835
AT4G14660	0.458225	0.0136637398898756	AT4G14615	-0.459874	0.0473129810286214
AT1G02660	4.22113	1.31564661121782e-67	AT1G02640	0.530188	0.00236201491683986
AT3G55160	-0.555484	0.0488099497378342	AT3G55130	5.86438	7.5614483398405e-129
AT2G14285	0.984329	4.65574110242723e-11	AT2G14247	4.24985	1.87489077139802e-78
AT5G52410	0.733474	1.03818204980549e-05	AT5G52390	-2.25911	0.00296866839758179
AT3G24430	4.49103	3.62082097639646e-104	AT3G24360	-1.3546	0.00430822178253058
AT5G26000	8.23336	1.53141445184515e-213	AT5G25970	4.76166	3.31577791657992e-11
AT1G72520	4.20667	9.17414566939652e-23	AT1G72490	-3.30274	3.87102437517304e-05
AT5G20790	1.5516	3.08343555382337e-08	AT5G20730	-0.29741	0.0352242481655649
AT4G23020	3.10624	1.88848320726969e-34	AT4G23000	1.41827	1.06641261517223e-05
AT3G03530	-2.80443	4.83159559118784e-23	AT3G03500	-5.74972	1.80220306325919e-35
AT4G12060	2.23505	1.73079646729978e-63	AT4G12020	-0.628552	1.6678744946781e-08
AT3G21260	-1.01011	1.18423838171617e-08	AT3G21230	-1.88253	3.76207980676136e-21
AT5G13150	-4.99156	2.05420222855625e-19	AT5G13100	0.661857	8.40342956829138e-19
AT3G46130	-2.539	7.31755056370195e-43	AT3G46090	4.10216	5.93001934883926e-13
AT4G12980	2.93443	2.26166175132752e-15	AT4G12917	6.60823	2.33567017690233e-33
AT1G21640	1.43177	1.17478973403255e-64	AT1G21610	0.438538	0.0139386106415371
AT1G07430	2.36952	0.00256879819680021	AT1G07390	1.45698	4.45880399911328e-11
AT1G01670	-1.28514	0.00010954880228924	AT1G01630	0.651207	3.46842067414596e-05
AT2G20990	0.425321	0.000450831722407733	AT2G20950	0.477487	0.00239962224020593
AT5G40100	-2.58999	1.18678703549108e-28	AT5G40020	-2.78868	8.63906566305248e-14
AT1G18700	0.316851	0.00123401318397213	AT1G18620	3.08494	2.08421005418589e-40
AT5G16150	1.90836	3.34059837493866e-140	AT5G16070	-0.420288	0.0214115428674883
AT1G53140	0.495891	0.0490727932166012	AT1G53070	-0.773085	7.57279931752846e-05
AT3G55580	2.45332	1.03029600685701e-10	AT3G55500	4.4658	6.08972923837654e-26
AT4G24400	-0.721998	7.26665445266791e-23	AT4G24330	-0.486701	3.12992918779518e-08
AT5G49680	-3.66699	1.46694606284317e-62	AT5G49650	0.339205	0.000291923283847592
AT2G45460	0.440571	0.000466929547027478	AT2G45420	-2.78096	7.20867446078499e-08
AT1G17240	-2.2545	3.19431138214058e-07	AT1G17200	4.54247	4.68045624108101e-145
AT5G27100	-1.51757	6.5233746728079e-21	AT5G27000	-2.32881	5.94653486118602e-15
AT5G20840	0.720354	1.61519249934459e-15	AT5G20710	-3.02169	0.000818769388119953
AT1G18690	0.387824	0.0051468075228066	AT1G18620	3.08494	2.08421005418589e-40
AT1G14230	-0.814159	5.43170103447338e-10	AT1G14170	-1.68784	2.20727368999618e-08
AT2G16950	-0.379558	1.7384476623755e-07	AT2G16920	-0.470267	1.23600530955677e-08
AT4G27370	1.78814	1.21120593084388e-06	AT4G27300	5.23805	1.80243843901158e-201
AT3G02050	1.51286	1.03837561855577e-34	AT3G02020	1.94387	6.10311257123745e-05
AT3G57630	-1.43327	1.12415123808704e-14	AT3G57600	7.96249	2.23604682454524e-19
AT3G07330	-0.460816	0.0015884492017912	AT3G07320	-0.477375	8.86735633372482e-05
AT1G55430	-5.05875	1.87420674631167e-35	AT1G55390	-2.989	1.96115367517886e-13
AT5G46470	0.726949	0.00168750164222977	AT5G46450	3.11682	4.58910981028654e-48
AT5G12330	-3.10759	5.92725721509833e-08	AT5G12280	-2.69259	2.13050769814757e-09
AT3G45440	-2.97824	1.23088233272639e-11	AT3G45390	-2.64176	3.34253218148038e-09
AT3G47050	-6.42586	8.52904847159831e-17	AT3G46970	2.87743	7.33551196859014e-43
AT5G60580	-1.28794	3.41217535823448e-10	AT5G60570	-0.931187	0.000206073840333547
AT1G02670	1.90406	2.24639455608982e-08	AT1G02660	4.22113	1.31564661121782e-67
AT4G16140	0.821525	0.00540374944069427	AT4G16110	-1.17421	3.02725849923445e-13
AT1G70290	0.906768	2.16781578777228e-07	AT1G70250	0.758169	0.00649796438449118
AT2G39850	6.7857	1.41654836591021e-36	AT2G39810	0.270906	0.0129743913710312
AT1G68890	3.79627	8.78283016139402e-36	AT1G68880	-3.01644	1.49878174734815e-21
AT5G45260	-0.237666	0.0107898142601328	AT5G45200	-5.13828	2.58913987951404e-15
AT1G63360	6.1313	8.89591949188856e-119	AT1G63350	1.12647	2.50942866144952e-05
AT5G46510	0.703522	0.0235165605123907	AT5G46500	4.77309	7.65301541064462e-08
AT1G13770	0.63091	0.00055124729100413	AT1G13750	-1.02691	8.34503410976629e-14
AT5G61280	-1.97382	0.000967303173772152	AT5G61270	5.83562	7.17899327454003e-93
AT1G62500	3.0407	8.55842832434507e-09	AT1G62440	-3.29872	4.93118349464032e-12
AT4G16890	2.55938	2.02741479868906e-44	AT4G16880	7.48101	6.81002425650426e-49
AT3G22415	-1.93088	0.000407608342824927	AT3G22410	1.38738	3.48133049860347e-07
AT4G36220	2.05892	0.000152345458179144	AT4G36195	-0.346941	0.0206838321197364
AT3G29034	-3.09779	3.62538567579684e-18	AT3G29030	6.39756	1.35095751089316e-88
AT3G22420	4.81453	5.32384205710873e-173	AT3G22400	-1.5917	1.08638075951392e-36
AT4G15236	3.92956	6.19505707255257e-13	AT4G15233	0.964055	0.021634226872707
AT5G66610	1.01912	0.00826209110794951	AT5G66580	1.07384	2.27659854233822e-07
AT3G46480	-3.34622	7.21143992850943e-14	AT3G46450	0.294795	0.0171865218455051
AT4G10550	-0.907323	9.91292072934856e-09	AT4G10510	-6.78454	5.63988443921346e-27
AT4G34950	2.03155	2.09405874533241e-13	AT4G34900	5.1846	9.52480466179518e-42
AT5G53210	6.40716	1.19038335590775e-53	AT5G53170	1.46812	2.76700521011232e-15
AT1G67890	0.521039	0.00208256711795187	AT1G67840	2.89997	4.10726043862537e-46
AT2G26900	2.28103	6.93226398615903e-47	AT2G26870	1.8848	2.6804205041733e-06
AT1G61190	5.31248	0	AT1G61140	-0.696563	1.64313013354489e-05
AT1G68890	3.79627	8.78283016139402e-36	AT1G68850	-5.38412	9.02815982509422e-35
AT2G31060	-0.518765	0.0323772801498846	AT2G31020	-3.78441	1.01963867923519e-33
AT1G03090	1.04789	0.000312712631433498	AT1G03060	-0.531658	0.00200253536972067
AT1G72210	-1.61416	0.00049385550714365	AT1G72180	1.14363	3.6296947536974e-06
AT1G03520	0.71675	1.42202432618776e-11	AT1G03457	-0.808745	1.41526474090621e-06
AT5G01075	3.74073	1.22985350550381e-56	AT5G01030	1.17487	2.00714059348418e-10
AT1G69200	3.78275	1.42337097986674e-121	AT1G69160	3.19588	5.06397545149834e-77
AT5G61820	-0.942911	0.00259150458240094	AT5G61780	-0.670456	5.33683457509197e-05
AT5G20250	1.47007	0.000128440411041474	AT5G20220	2.90305	2.08045361629059e-37
AT2G18980	-5.30335	1.31564213116291e-69	AT2G18940	1.60281	1.36615003259383e-48
AT3G06640	2.2149	2.99425924385214e-09	AT3G06550	0.209438	0.00839523179112323
AT3G27300	-1.41767	5.33081570573359e-25	AT3G27260	0.543973	7.06919113072183e-09
AT3G18160	0.502486	0.0129573937238878	AT3G18110	2.0578	9.51320586732008e-13
AT1G68260	1.92273	1.68499505556489e-22	AT1G68190	8.1358	2.25184448634059e-241
AT1G61300	7.17968	9.78245711622623e-68	AT1G61240	0.315752	0.00466573933205462
AT5G56350	-1.23117	3.13033986397981e-15	AT5G56290	0.655411	1.25163088880115e-09
AT4G02010	-0.418542	0.000335802618548549	AT4G01970	-2.9199	0.00069959473171885
AT3G62720	0.95313	2.01757491411919e-06	AT3G62700	0.666003	6.68589162291557e-09
AT5G04740	-0.978949	3.63779210856145e-18	AT5G04690	2.14983	1.31352495299811e-07
AT3G02260	-0.495919	0.0385927388656337	AT3G02220	0.270506	0.0405310068170224
AT2G39890	-0.611211	0.0285960398491108	AT2G39855	6.30833	6.90851595354897e-10
AT2G32850	-0.367552	0.0164482436155118	AT2G32800	1.71381	1.13900058497971e-12
AT5G46390	2.3193	1.25900802609112e-81	AT5G46330	4.83513	2.85486655878744e-162
AT5G13000	0.52573	0.0384692802884094	AT5G12940	-1.55069	1.40545892485667e-09
AT3G24240	-5.48013	4.81136665203793e-27	AT3G24210	-5.9471	4.26246118247856e-25
AT5G57360	0.698344	0.00900970292405052	AT5G57320	1.07989	0.00194725195136608
AT1G68945	1.14866	0.0140600789872252	AT1G68890	3.79627	8.78283016139402e-36
AT1G23090	4.26765	9.09013521915651e-41	AT1G23080	2.01809	6.48920664249694e-69
AT5G49660	-0.416618	0.0159296752495828	AT5G49650	0.339205	0.000291923283847592
AT2G24640	-0.456191	0.0187102957773522	AT2G24610	-3.71009	4.99417103367621e-23
AT3G46110	2.31946	1.07340498817696e-19	AT3G46090	4.10216	5.93001934883926e-13
AT5G09880	0.373887	0.036626398712492	AT5G09870	0.960621	2.7544648480835e-10
AT1G69420	1.19245	3.20822546549296e-16	AT1G69410	-1.03938	1.67253940561514e-05
AT5G45220	-3.89996	3.52416060561697e-21	AT5G45200	-5.13828	2.58913987951404e-15
AT1G70300	-1.13446	6.71875579523552e-06	AT1G70290	0.906768	2.16781578777228e-07
AT2G32550	1.07431	0.0199094978608395	AT2G32540	4.39237	9.39773524529834e-44
AT2G21540	1.86184	4.13050114875317e-06	AT2G21520	-0.305567	0.0263176948445464
AT5G48810	-0.24223	0.0123359256253342	AT5G48790	3.78989	3.3399918770076e-118
AT3G16570	2.50534	3.23774277797662e-18	AT3G16565	-1.0787	1.68583080160647e-07
AT3G44690	-0.689279	0.00142868568856663	AT3G44670	1.40838	4.22078020228016e-07
AT5G61670	1.46539	1.09437960050878e-17	AT5G61640	-0.892537	0.00395298896768623
AT5G02250	1.65912	1.0491654758894e-60	AT5G02230	-1.13825	0.0158424261904643
AT5G23430	-0.853152	1.21849297777916e-19	AT5G23420	0.64351	0.00335503411566566
AT3G60380	0.480624	0.000318497853145093	AT3G60350	0.4828	4.73010958812252e-05
AT4G32800	2.65954	7.07230075827815e-14	AT4G32770	2.99263	7.14670261195954e-19
AT4G35250	4.92444	7.52037188927852e-215	AT4G35230	0.554258	0.00237348789583666
AT1G18610	0.744233	5.68135848973648e-08	AT1G18550	0.814309	0.00383364489413262
AT3G06510	1.49746	3.08565256997254e-16	AT3G06480	0.319209	0.00234593377943485
AT1G75310	0.481133	3.6296947536974e-06	AT1G75260	-0.93303	0.01057399746198
AT3G19850	7.41918	8.48296245762792e-117	AT3G19830	1.06121	6.24530461089223e-12
AT1G47600	-5.95029	9.38975337248742e-17	AT1G47570	-0.66885	3.88035586767445e-08
AT1G18700	0.316851	0.00123401318397213	AT1G18660	1.16778	2.31516184067938e-10
AT3G28880	-1.65354	3.75691114301224e-15	AT3G28860	0.773728	0.000250965245792971
AT4G08590	-1.70034	7.12958299672647e-23	AT4G08540	0.362668	0.00271331663166879
AT5G04230	5.37806	2.09518392930628e-152	AT5G04140	7.40463	1.23797485802098e-227
AT2G31083	-6.24796	1.0301155136567e-31	AT2G31070	3.71341	2.38652782812119e-60
AT3G21620	-4.29342	2.32020966049318e-24	AT3G21550	-1.34361	1.45833306785367e-05
AT2G29670	5.03881	9.41713087699423e-104	AT2G29620	-4.71542	4.51363546488392e-64
AT5G46270	1.61024	6.08951270116303e-35	AT5G46220	2.44961	3.38103084781796e-05
AT5G45105	-5.47019	1.46016089986977e-11	AT5G45060	1.15985	1.05861556193097e-11
AT2G28050	0.658086	0.000619694628599916	AT2G27990	4.76468	1.53788839559516e-26
AT1G30450	-0.416249	0.000106608465076106	AT1G30420	-2.00563	2.07427282472961e-14
AT2G17760	-1.01856	2.11935860658073e-11	AT2G17710	-2.40371	1.20916237767045e-41
AT1G30755	-0.846839	8.31185749040791e-08	AT1G30690	0.341853	0.00164070593571928
AT3G63060	1.77046	0.0207727503107714	AT3G62970	0.537695	0.000152408631914435
AT3G05030	0.625262	0.0436796827328709	AT3G04960	1.33581	0.000374609841023187
AT3G05810	-0.314716	0.0139917835218675	AT3G05740	0.442011	0.0455562224026778
AT4G15430	1.08144	5.3853644114337e-06	AT4G15400	-5.75454	3.78425722407549e-30
AT2G25170	0.509542	0.00905829422291053	AT2G25140	-0.888456	5.7815581793991e-16
AT4G11670	-0.462391	0.000578035696335415	AT4G11610	-5.61028	1.96617018918136e-19
AT4G02710	-1.90022	8.09204782836348e-13	AT4G02660	-1.45544	0.00144841635090342
AT3G06520	1.43567	0.00101461250413406	AT3G06480	0.319209	0.00234593377943485
AT1G28710	1.55002	3.01336743681234e-07	AT1G28610	4.4693	1.59930017521261e-30
AT1G07550	-5.89004	3.85914472306686e-58	AT1G07530	-0.427403	0.0363443999366789
AT1G32940	-0.892087	0.0207453857571016	AT1G32900	5.50165	5.50154724811729e-71
AT3G60350	0.4828	4.73010958812252e-05	AT3G60330	-3.33388	1.32271978845482e-39
AT2G35060	1.73327	5.64965451699007e-42	AT2G35040	0.419429	0.000228433222623439
AT5G58410	-0.518548	4.98583242578518e-07	AT5G58390	9.44175	8.82708907042899e-28
AT3G19180	0.974193	0.00230436922391207	AT3G19170	2.8486	2.65421854481802e-83
AT3G55110	5.61368	5.11312067636934e-37	AT3G55090	-1.68221	1.18814474791484e-06
AT4G35110	-1.03333	0.00150341562538102	AT4G35100	0.824068	0.00164515868026727
AT3G24255	0.406791	0.0199872953426257	AT3G24240	-5.48013	4.81136665203793e-27
AT4G14930	1.86175	6.11777292743452e-51	AT4G14920	0.460236	0.00692875082942754
AT1G70710	-0.700258	0.0328315938064221	AT1G70700	4.15477	2.22287635658496e-89
AT4G25470	4.27794	4.85560645253009e-11	AT4G25450	1.94224	6.05140767097441e-33
AT5G46520	-1.59951	9.76483606844253e-08	AT5G46500	4.77309	7.65301541064462e-08
AT2G32560	1.0141	0.000133630966055066	AT2G32530	4.52586	1.33096331551956e-66
AT1G51590	-0.481048	0.00175067269225497	AT1G51560	1.27672	1.17769853949362e-19
AT5G08180	-0.662786	8.30918475652211e-05	AT5G08160	-0.944299	5.17973728147496e-16
AT4G23250	4.92204	4.72102555843165e-57	AT4G23220	7.5655	2.52284247056329e-49
AT4G39370	-0.567638	0.000323134628012143	AT4G39350	0.394185	0.00198561549001158
AT4G33010	3.96759	1.7152606498944e-38	AT4G32980	6.9929	1.24621049970409e-113
AT1G60810	-0.896524	1.35592157818194e-28	AT1G60790	1.05344	8.46534245820198e-12
AT2G16940	0.703394	1.05264821255899e-05	AT2G16920	-0.470267	1.23600530955677e-08
AT4G10550	-0.907323	9.91292072934856e-09	AT4G10510	-6.78454	5.63988443921346e-27
AT3G54820	1.43294	9.78770576196373e-06	AT3G54790	0.415809	0.00388347860290056
AT1G56540	0.944678	1.14056757780877e-05	AT1G56510	7.00144	6.28193826751109e-75
AT5G07700	5.3448	4.51174554115452e-15	AT5G07660	1.17414	0.000102932782758489
AT4G16900	1.16585	7.73801154939317e-22	AT4G16850	-1.26976	3.13266143453053e-07
AT1G05460	0.840479	2.2223853842024e-05	AT1G05420	1.04274	0.0029955123024403
AT3G27870	1.04108	0.000666594196629787	AT3G27820	0.871854	7.31431415799707e-08
AT5G27100	-1.51757	6.5233746728079e-21	AT5G27000	-2.32881	5.94653486118602e-15
AT4G34890	-0.415693	0.000435928824812462	AT4G34860	-0.903666	1.2356801844011e-14
AT3G16370	4.4498	7.78717924610167e-40	AT3G16320	-0.859408	0.000125186822442885
AT5G60600	3.68932	0	AT5G60530	-5.23777	1.13683136501985e-07
AT1G03080	-1.12717	3.01299459744814e-09	AT1G03060	-0.531658	0.00200253536972067
AT5G45520	4.72077	1.58830379545489e-26	AT5G45460	0.386666	0.0282895825963084
AT4G24730	0.998618	1.0930452962848e-09	AT4G24690	-1.21528	8.55274319983652e-10
AT1G32080	7.23763	2.65338321561034e-110	AT1G31950	-3.34576	2.80166578521474e-19
AT1G78450	1.74589	2.77616617501145e-06	AT1G78430	0.773007	0.00608450181316266
AT2G17820	-0.580343	0.00305343140010116	AT2G17790	-0.81258	4.54096291584642e-15
AT5G44010	1.71751	1.52358485223132e-13	AT5G44005	1.17627	0.00102314323778472
AT3G57610	0.584613	1.96657031447432e-05	AT3G57560	1.55785	4.67899674800356e-17
AT1G05010	2.45347	2.87914354149867e-22	AT1G05000	-1.93148	4.58073704764297e-07
AT1G52310	0.283029	0.00964178318987452	AT1G52290	4.73191	1.83677401024838e-98
AT5G63180	6.96609	1.43334934643919e-239	AT5G63160	2.04708	3.66137493503614e-05
AT4G18160	0.434013	0.0281299724133046	AT4G18130	0.847871	5.19071558689485e-06
AT5G46560	-0.245557	0.0201156085644583	AT5G46550	0.628191	5.88258079731129e-06
AT1G64170	-1.33848	0.00340944535872294	AT1G64150	4.64021	2.28661725479982e-58
AT5G26667	-0.659592	3.74479679293935e-08	AT5G26570	1.72342	3.30117806669103e-59
AT1G77620	-0.362239	0.0353320985324275	AT1G77600	0.700969	0.00672644014237254
AT4G12030	0.925148	0.00827971104441632	AT4G12010	-0.599879	7.17901103369001e-09
AT4G27340	2.26192	5.09440029827104e-40	AT4G27320	-0.605274	7.77278913140671e-09
AT3G26240	2.15116	5.88683666544185e-59	AT3G26210	-1.02567	0.0428136604927927
AT4G01250	3.15552	8.54316880986116e-33	AT4G01210	0.704944	2.29206717705595e-05
AT1G61390	-1.49544	0.000163176453645766	AT1G61360	-1.8002	4.21621427708871e-07
AT3G11150	-2.65219	1.42561274107975e-06	AT3G11130	-0.614051	5.3780001684663e-12
AT5G39420	-1.78828	8.59445634684984e-07	AT5G39380	-1.00825	4.38582721156075e-06
AT1G62380	1.70524	1.15323030335887e-48	AT1G62360	6.37958	1.74971202303482e-34
AT1G58210	0.639868	0.00798579439168788	AT1G58190	-2.12865	7.7634987500645e-11
AT1G52050	-5.23971	1.08553216977369e-22	AT1G51860	-3.94709	1.17390857614013e-46
AT1G65730	-2.97413	9.28649100536923e-27	AT1G65620	2.9509	3.05732143696332e-16
AT5G57490	-0.326829	0.0119950681115848	AT5G57360	0.698344	0.00900970292405052
AT1G29410	1.21753	1.12973644163227e-11	AT1G29390	2.62238	2.52694910089631e-32
AT1G15630	-4.46981	7.81254094191949e-16	AT1G15570	1.01196	0.000234722410751348
AT3G07420	-0.818202	3.17661294942257e-07	AT3G07400	0.818134	5.11456956587091e-09
AT3G46490	2.86735	8.21037109695304e-35	AT3G46370	5.91371	1.91642207923984e-21
AT3G47780	-3.18669	3.62191577506396e-58	AT3G47730	-1.83988	9.76945567880061e-12
AT5G21222	3.79446	6.5736554884482e-225	AT5G21170	0.973285	6.63600266263914e-05
AT1G05030	1.24399	1.84378792935245e-22	AT1G05020	3.41185	8.40879852513362e-17
AT5G38420	7.95378	4.21861123925607e-170	AT5G38410	7.83776	1.68463897626054e-161
AT1G30420	-2.00563	2.07427282472961e-14	AT1G30410	0.855141	0.00415610894190424
AT1G66140	-1.2462	4.97028692215814e-05	AT1G66130	5.55639	3.00715501823289e-150
AT5G03610	-1.39306	2.39713305163538e-06	AT5G03570	-5.67257	4.29047145419964e-22
AT4G04350	3.02011	2.29626997107798e-46	AT4G04340	2.00593	3.18509580621205e-76
AT3G05660	5.20369	5.22214546676077e-30	AT3G05650	4.7539	1.87766548337497e-14
AT1G51460	3.63108	1.10315433618177e-17	AT1G51430	1.06046	1.0825752221202e-08
AT5G26667	-0.659592	3.74479679293935e-08	AT5G26570	1.72342	3.30117806669103e-59
AT5G09420	-0.788752	0.000836945021653706	AT5G09400	-0.569711	0.000572405365161725
AT2G30990	1.58539	3.52559719184507e-13	AT2G30970	-0.345886	2.54644091309801e-07
AT5G51490	-6.66429	1.76985233239162e-23	AT5G51430	-0.253973	0.020737415369774
AT5G27930	-0.264187	0.0367018786718301	AT5G27920	-1.36471	3.35114214329077e-05
AT2G03505	-3.1745	1.48396649589167e-15	AT2G03480	-0.617374	0.00437599874788544
AT1G03620	-0.686245	0.00545196728532722	AT1G03560	0.419062	0.0394030208987599
AT3G46400	-5.59772	2.67519618637992e-12	AT3G46370	5.91371	1.91642207923984e-21
AT1G75110	1.27083	2.05971827125538e-06	AT1G75040	9.69454	5.30373311095661e-21
AT1G51820	1.48462	3.50273617468003e-07	AT1G51800	-1.22176	0.000697390718735551
AT1G73960	0.47446	0.00967164577700594	AT1G73920	1.03427	8.12346493045328e-15
AT1G33600	4.97643	5.66838617292915e-141	AT1G33540	-5.79014	2.64098070809305e-12
AT1G51630	-0.773082	1.85982448330357e-23	AT1G51570	1.36181	3.26376641074326e-50
AT1G02730	1.02795	2.26552381314624e-08	AT1G02670	1.90406	2.24639455608982e-08
AT5G14610	1.44336	1.16955299405637e-20	AT5G14580	-0.668459	0.038535696745212
AT2G32910	0.261812	0.0425139360128925	AT2G32870	8.4884	2.65906765134821e-123
AT3G47050	-6.42586	8.52904847159831e-17	AT3G46980	1.00481	1.70519544890844e-21
AT3G46980	1.00481	1.70519544890844e-21	AT3G46970	2.87743	7.33551196859014e-43
AT5G45530	5.01884	1.60326483562649e-14	AT5G45460	0.386666	0.0282895825963084
AT5G04230	5.37806	2.09518392930628e-152	AT5G04140	7.40463	1.23797485802098e-227
AT4G23700	-4.31437	2.38626455297008e-47	AT4G23590	-5.61502	8.34142040979557e-22
AT3G18090	1.5504	4.7943631975041e-14	AT3G18070	2.08242	1.15141773907077e-09
AT5G19660	-0.29122	0.00828337450458761	AT5G19550	-1.07897	2.78593145917428e-05
AT1G61520	6.69819	7.59262459448611e-128	AT1G61490	-0.578744	0.0422435758898071
AT1G66430	2.63307	3.57641531019027e-152	AT1G66410	-0.991007	4.49516143702459e-27
AT2G26980	1.21271	0.000107700310386799	AT2G26970	0.361682	0.00179867652083209
AT3G28420	1.80683	4.06727378810446e-05	AT3G28380	-4.01959	2.33581871986706e-09
AT1G70310	0.179413	0.0189073543453717	AT1G70280	1.48622	1.21389694005257e-17
AT5G51230	0.518097	0.000666291908315234	AT5G51200	0.632463	0.0121483054205893
AT4G22360	0.611416	1.01450709233507e-10	AT4G22340	-0.458024	0.0271615106942557
AT3G13800	0.533488	2.93784241003191e-07	AT3G13772	-0.94097	8.111369523417e-06
AT1G15060	0.823155	8.86623902367572e-12	AT1G15020	-0.683856	1.45465165294349e-07
AT4G18550	-3.36545	5.71379377225386e-24	AT4G18490	0.857868	0.00413577693739698
AT1G68260	1.92273	1.68499505556489e-22	AT1G68190	8.1358	2.25184448634059e-241
AT4G36270	1.65065	0.000107499271056526	AT4G36250	2.24192	2.36375710880285e-06
AT1G30720	-1.43255	0.0120660436591611	AT1G30680	1.46757	7.14584221449414e-29
AT2G41850	-2.06389	0.0215456688790307	AT2G41830	-0.520829	7.27927755986057e-05
AT3G08860	-1.56425	7.61716961555864e-11	AT3G08840	0.537843	1.36698223441733e-05
AT3G55160	-0.555484	0.0488099497378342	AT3G55110	5.61368	5.11312067636934e-37
AT1G51610	1.4851	1.87706611732498e-51	AT1G51570	1.36181	3.26376641074326e-50
AT3G02020	1.94387	6.10311257123745e-05	AT3G01930	-1.56231	2.60941188192665e-25
AT2G40620	-0.566462	1.26910698677558e-05	AT2G40610	3.13067	1.05366247529263e-23
AT3G03630	3.10189	4.23950913630441e-104	AT3G03610	-0.920955	1.03880604258576e-08
AT4G00740	-0.564155	5.22304468889301e-05	AT4G00730	2.00677	1.17676749556107e-07
AT5G11250	1.13865	4.91847166976796e-27	AT5G11240	-0.490031	0.0062230446483626
AT4G19380	4.32743	1.1802829061344e-28	AT4G19350	0.720594	7.47093256044007e-14
AT2G16940	0.703394	1.05264821255899e-05	AT2G16920	-0.470267	1.23600530955677e-08
AT4G23990	7.17927	9.46734724158005e-64	AT4G23940	2.05683	3.24290903896494e-15
AT1G04790	0.500129	2.1249451894243e-08	AT1G04778	-2.04987	6.72025027523914e-05
AT4G38910	0.932884	2.00206774590118e-08	AT4G38860	5.49422	1.66160889311186e-20
AT1G62310	0.531839	4.4539099644249e-05	AT1G62290	2.56295	6.28343956390916e-11
AT1G61140	-0.696563	1.64313013354489e-05	AT1G61120	6.32682	2.48202157742411e-06
AT2G37500	0.867881	6.83472968790483e-13	AT2G37440	-4.73346	2.85974916497655e-42
AT2G30210	-4.80122	2.3844137792559e-22	AT2G30140	0.721588	0.0179607978241869
AT5G48090	-2.02344	6.82063982250474e-06	AT5G48060	-0.535903	0.0163807975024146
AT4G19030	-5.36956	8.89784268583203e-40	AT4G19020	0.997046	3.09505328580923e-05
AT3G10720	2.31323	8.01131750505621e-14	AT3G10710	-5.83048	1.00336511795181e-35
AT3G10740	-0.747445	0.00656291084951109	AT3G10710	-5.83048	1.00336511795181e-35
AT4G34260	1.00724	3.02256765904123e-16	AT4G34250	2.68619	4.83541535506575e-24
AT5G64130	-0.961725	4.88924570901125e-15	AT5G64110	3.33692	4.46464744634949e-83
AT5G63800	1.53535	9.80135846503842e-28	AT5G63780	1.69733	6.57756087380124e-17
AT3G24360	-1.3546	0.00430822178253058	AT3G24340	1.08604	0.00134582675330011
AT1G24147	5.65929	2.31542079421119e-10	AT1G24120	0.33172	0.0015899887281652
AT2G40520	5.15635	7.36468500208557e-78	AT2G40490	3.58532	2.45041769074309e-117
AT1G10820	0.32568	0.00274009715188519	AT1G10760	1.75451	2.63900408842521e-21
AT5G14060	2.05871	4.65614318250147e-44	AT5G14020	-5.6748	8.72428672757108e-25
AT3G03250	-0.6261	1.4699268489359e-09	AT3G03200	-0.772042	0.00715065511023148
AT1G79500	0.440911	0.0013049618084129	AT1G79450	-4.18145	1.72013196416402e-65
AT2G34220	-1.5195	0.000722896566798957	AT2G34170	2.61779	1.48454895511122e-12
AT1G11490	-2.32697	3.07386729699305e-05	AT1G11450	-2.66037	7.26952516052139e-29
AT3G46800	-4.90369	8.67925568820135e-12	AT3G46740	1.26191	1.10868881225035e-71
AT4G31060	1.45539	1.43556909787555e-20	AT4G31040	1.24584	1.36307792318021e-12
AT4G17000	0.773732	0.0358202322209048	AT4G16990	7.82268	3.13637103124229e-138
AT1G55430	-5.05875	1.87420674631167e-35	AT1G55390	-2.989	1.96115367517886e-13
AT2G14530	0.364421	0.01540470763609	AT2G14520	-0.566099	0.0234755334007118
AT5G54790	-5.58622	7.2936644026329e-19	AT5G54770	4.86962	2.39506355712751e-122
AT4G18600	0.335512	0.00949269167446632	AT4G18570	2.50505	2.90640538258764e-119
AT3G27500	-1.77856	3.42695470157386e-05	AT3G27490	-4.26866	2.91288713137479e-12
AT3G63520	1.91214	1.51853821179115e-55	AT3G63480	0.915507	0.00119601218333418
AT3G17850	0.538328	6.06071943954033e-06	AT3G17830	1.03879	0.00246823211293101
AT4G04910	-0.577601	4.97832866191823e-09	AT4G04885	0.353308	0.00138849616853767
AT1G56570	0.679804	0.00137890463678545	AT1G56520	6.81212	1.85283684800453e-72
AT1G02580	-3.04612	8.39275505576786e-09	AT1G02530	-2.20357	0.00248639750587482
AT4G16140	0.821525	0.00540374944069427	AT4G16130	0.684636	1.58234002885509e-08
AT1G51860	-3.94709	1.17390857614013e-46	AT1G51800	-1.22176	0.000697390718735551
AT4G16141	0.557156	0.000543054212759721	AT4G16140	0.821525	0.00540374944069427
AT1G66950	-5.02397	7.42142954142439e-14	AT1G66940	8.30084	2.67811604995356e-136
AT2G21340	2.53249	1.40263193673293e-78	AT2G21320	3.40104	4.43010969860661e-27
AT4G35950	1.03098	3.0063331095046e-12	AT4G35930	-0.760586	1.79099040295209e-08
AT3G59060	6.28018	1.56045395983119e-100	AT3G59040	2.54515	4.48407267371241e-114
AT4G04370	1.07552	6.53394525096528e-06	AT4G04340	2.00593	3.18509580621205e-76
AT1G27120	2.49607	2.81332504943455e-34	AT1G27090	0.672634	3.52911234887999e-08
AT5G48460	1.61116	1.20467401975364e-22	AT5G48440	-0.637914	1.10503533246726e-09
AT3G45890	0.703274	2.59886225719923e-06	AT3G45850	1.06141	7.66630997304369e-07
AT3G17850	0.538328	6.06071943954033e-06	AT3G17820	-0.911256	2.81844143873978e-08
AT3G47790	-5.48692	5.99024878662541e-40	AT3G47760	-5.23565	3.72936009656541e-08
AT4G27730	0.771815	1.26407834201209e-05	AT4G27710	1.16722	2.67856372856845e-17
AT4G18830	4.41331	4.8105032027477e-15	AT4G18820	0.706285	0.00728924199995822
AT2G34430	7.46153	3.53821651202482e-16	AT2G34410	-0.753874	1.35606406345527e-06
AT1G56510	7.00144	6.28193826751109e-75	AT1G56500	4.0111	3.33265162847515e-131
AT1G29660	3.81595	1.3157560965993e-13	AT1G29590	1.79043	4.01617684044375e-08
AT1G80110	-0.598727	0.0216710295645898	AT1G80080	6.52173	2.60334932648092e-140
AT5G02940	5.16694	2.17110735628937e-98	AT5G02880	-0.535391	0.00192692593564208
AT3G48280	1.53376	0.0137741491081283	AT3G48260	-1.57629	1.85857231501173e-07
AT3G55110	5.61368	5.11312067636934e-37	AT3G55080	1.51022	2.81781659218697e-34
AT4G14330	0.784198	0.00388883395057377	AT4G14280	-6.10704	1.95050385976029e-10
AT5G53850	0.497911	3.15775280237319e-07	AT5G53830	1.23888	6.37827139898862e-09
AT4G04920	-0.657397	2.9838677288452e-12	AT4G04910	-0.577601	4.97832866191823e-09
AT2G36390	0.883062	2.01584610896605e-08	AT2G36370	-0.342479	0.00904399370178353
AT5G04220	1.24991	7.51143612184431e-06	AT5G04140	7.40463	1.23797485802098e-227
AT2G32550	1.07431	0.0199094978608395	AT2G32540	4.39237	9.39773524529834e-44
AT1G47620	-5.87871	7.74665672094261e-12	AT1G47603	-3.92928	4.46669837208827e-07
AT5G49820	1.31276	1.6560569218538e-52	AT5G49770	-5.34104	1.2767702966006e-56
AT1G63440	-3.08086	2.57931379491646e-63	AT1G63350	1.12647	2.50942866144952e-05
AT1G02660	4.22113	1.31564661121782e-67	AT1G02640	0.530188	0.00236201491683986
AT3G54960	-2.58269	6.64960500827512e-38	AT3G54930	0.538189	0.0147138002472381
AT4G13820	1.38368	0.0249424961039855	AT4G13800	6.71554	1.10161102834725e-17
AT4G13150	1.52365	5.6134997462379e-35	AT4G13130	-4.17685	7.58889508336899e-31
AT5G18410	0.324768	0.00386043419092279	AT5G18370	-1.51303	4.00344034697295e-23
AT5G44130	3.52094	4.34002290483807e-11	AT5G44120	2.23721	0.0311638809943859
AT2G26030	0.504512	0.0106829878056011	AT2G26000	0.466486	0.0311240728655873
AT5G48470	2.50445	2.71885988708405e-62	AT5G48460	1.61116	1.20467401975364e-22
AT4G26540	0.509674	0.000664834610505627	AT4G26530	8.55796	5.5842879796997e-91
AT1G68910	0.425413	1.05418825888771e-05	AT1G68890	3.79627	8.78283016139402e-36
AT5G12400	-0.525431	3.52911234887999e-08	AT5G12370	0.480932	2.20074806251269e-06
AT3G15480	0.765078	7.36573774088754e-09	AT3G15470	0.628541	1.51458893385768e-10
AT5G55480	-0.37697	0.018089828661735	AT5G55470	0.635542	0.00308567050231687
AT1G51590	-0.481048	0.00175067269225497	AT1G51570	1.36181	3.26376641074326e-50
AT4G32990	6.48838	1.10985748838684e-18	AT4G32970	0.643238	0.0325318971225514
AT5G49840	0.877501	8.8230936220859e-21	AT5G49820	1.31276	1.6560569218538e-52
AT5G39090	-1.44149	5.55682143213219e-05	AT5G39080	4.21825	1.580426447753e-77
AT5G13680	-0.287357	0.0126928024427956	AT5G13630	6.54019	5.54735578899884e-181
AT5G22050	0.914889	5.49671058554221e-10	AT5G22040	0.496756	0.00674554326370694
AT5G65410	6.93044	1.83509737079729e-102	AT5G65400	1.68375	3.64207860650037e-15
AT1G02640	0.530188	0.00236201491683986	AT1G02630	2.79735	2.71793478782821e-05
AT3G53510	-1.98166	3.31331106616357e-11	AT3G53480	-5.0051	1.32012107939761e-65
AT5G49660	-0.416618	0.0159296752495828	AT5G49650	0.339205	0.000291923283847592
AT4G18830	4.41331	4.8105032027477e-15	AT4G18820	0.706285	0.00728924199995822
AT1G05520	-0.624555	3.55293358873879e-09	AT1G05460	0.840479	2.2223853842024e-05
AT3G13120	4.0993	1.12760490192155e-153	AT3G13100	-2.33208	2.97223072109275e-13
AT1G73870	7.63564	1.08258065846194e-95	AT1G73860	-3.81201	1.94631516690857e-28
AT1G75350	4.69413	1.40377346374218e-115	AT1G75310	0.481133	3.6296947536974e-06
AT3G08030	0.683379	0.00900147838413007	AT3G08020	0.976127	1.54263431422659e-12
AT4G19420	1.93709	2.64024690677212e-08	AT4G19410	0.470756	2.83772585178351e-05
AT1G55360	0.757259	3.07015127594359e-08	AT1G55350	0.410676	0.0376780767945445
AT5G12370	0.480932	2.20074806251269e-06	AT5G12330	-3.10759	5.92725721509833e-08
AT3G47770	-4.89837	6.97538308638675e-07	AT3G47730	-1.83988	9.76945567880061e-12
AT5G22780	-0.220304	0.0392847883573017	AT5G22770	-0.307172	0.000562850769522665
AT1G12600	-1.20254	0.00208693179939693	AT1G12570	4.33362	3.36978202202541e-18
AT3G55140	0.680702	9.58566074797217e-12	AT3G55130	5.86438	7.5614483398405e-129
AT1G42560	2.93477	1.00786843777541e-08	AT1G42550	5.03116	7.25482905957067e-223
AT5G57670	-0.857875	0.0243156131278318	AT5G57660	3.39347	7.50974534458002e-188
AT1G17110	0.65264	0.000367600000040785	AT1G17090	-2.38552	3.15200662184501e-06
AT3G46400	-5.59772	2.67519618637992e-12	AT3G46370	5.91371	1.91642207923984e-21
AT2G26030	0.504512	0.0106829878056011	AT2G26000	0.466486	0.0311240728655873
AT4G18280	1.82182	0.00828651136197554	AT4G18270	0.90133	0.000386233843784316
AT1G03310	2.63071	4.74748528714427e-103	AT1G03290	-0.463525	2.49724844341123e-05
AT1G49980	0.364787	0.0229976188228496	AT1G49970	2.62727	1.02330365089997e-136
AT3G47800	1.63106	1.71939097050831e-17	AT3G47790	-5.48692	5.99024878662541e-40
AT3G01750	0.938833	3.03999459643706e-11	AT3G01720	-2.14666	8.70039837653817e-43
AT1G15310	-1.72742	7.97560343422516e-36	AT1G15290	3.524	1.28436183775593e-38
AT1G05020	3.41185	8.40879852513362e-17	AT1G05010	2.45347	2.87914354149867e-22
AT4G04370	1.07552	6.53394525096528e-06	AT4G04340	2.00593	3.18509580621205e-76
AT1G07720	4.56139	1.56789926996279e-187	AT1G07705	0.436735	8.09278169222966e-06
AT2G42590	1.32547	5.75686659879284e-11	AT2G42580	1.46886	3.67538541984551e-10
AT2G17080	-4.91575	1.12365758774987e-22	AT2G17060	-3.88985	1.13505961495567e-14
AT2G17040	3.69859	5.27120152829853e-28	AT2G17036	1.27253	4.81111749081277e-06
AT3G15095	1.52773	1.84326125158416e-10	AT3G15090	-0.441094	0.0374883739000173
AT4G23460	-0.258138	0.0173832009782707	AT4G23430	-0.969221	0.00220348796512555
AT5G41761	5.52781	4.55244805887416e-31	AT5G41760	0.409579	0.000254152958369729
AT1G33390	-0.363511	0.00646736201722624	AT1G33360	-1.02379	2.82593019086104e-06
AT4G37610	1.35302	4.14161315428141e-15	AT4G37608	-0.560251	0.0244039420566094
AT3G19270	4.02658	1.05032759316613e-21	AT3G19260	-1.26819	1.02031677303961e-12
AT2G28830	0.821541	1.36248662448149e-07	AT2G28800	2.74344	2.71225776889006e-66
AT2G15080	5.5221	1.07322257118287e-113	AT2G15050	5.93821	3.03064949568601e-126
AT3G23700	4.5068	0	AT3G23670	0.887315	0.00631130483413279
AT4G19440	-0.4895	0.0182963921659322	AT4G19420	1.93709	2.64024690677212e-08
AT1G50460	0.531324	0.009940142046396	AT1G50410	-0.383668	0.0157064939495871
AT1G76610	4.21927	1.40202965713421e-17	AT1G76590	-1.73328	1.07693437259799e-24
AT1G08320	-4.66741	6.36294007121691e-52	AT1G08300	1.13876	1.47556744232947e-08
AT1G25425	3.35654	3.05526939718009e-36	AT1G25400	1.27798	0.000513216866121543
AT1G30330	0.640475	1.36608100803189e-05	AT1G30300	-0.45451	0.000458218813394827
AT2G02540	2.55443	2.64545862577447e-18	AT2G02480	-1.07941	3.0990430632901e-05
AT5G44230	-0.472638	0.0137192108517314	AT5G44200	0.404562	1.57714534948967e-05
AT1G51860	-3.94709	1.17390857614013e-46	AT1G51805	7.1917	1.37600524771529e-223
AT1G51840	-4.47906	4.10692876154488e-81	AT1G51805	7.1917	1.37600524771529e-223
AT1G51880	-5.75359	8.00641733934526e-38	AT1G51805	7.1917	1.37600524771529e-223
AT1G57570	-4.89304	3.36847505939349e-27	AT1G56720	1.30607	1.44983835802332e-49
AT1G67890	0.521039	0.00208256711795187	AT1G67850	1.13068	1.53754014646785e-06
AT1G70170	-6.18539	4.27066734885613e-28	AT1G70140	-1.75385	9.78898975889736e-08
AT1G71230	-1.22466	2.1449066670114e-14	AT1G71200	-1.58905	0.0170539860542981
AT2G43010	5.92559	1.70745634960951e-72	AT2G43000	-2.92811	7.27113189124034e-05
AT3G05430	1.11505	1.20890455173542e-10	AT3G05380	-0.435822	0.00423571152972863
AT3G10290	2.25476	2.8034985975261e-11	AT3G10270	1.65913	5.77512349100378e-14
AT3G48350	0.808124	4.70055232058747e-05	AT3G48280	1.53376	0.0137741491081283
AT4G02130	2.22585	5.87420026903956e-16	AT4G02100	-0.730566	3.2536847862339e-07
AT4G08460	-0.343721	0.0307417352654236	AT4G08450	-5.27529	3.63322356363994e-23
AT4G13460	0.729127	5.67831308520248e-05	AT4G13430	0.551434	9.66603186716513e-07
AT4G14650	-2.20846	1.10042370890773e-18	AT4G14615	-0.459874	0.0473129810286214
AT4G16892	2.88438	6.73194512868525e-12	AT4G16860	3.98441	5.62444500461666e-89
AT4G17030	-0.848071	2.95092032167514e-05	AT4G16990	7.82268	3.13637103124229e-138
AT4G30080	-1.1114	7.56173584933721e-17	AT4G30060	-1.54079	4.23521288997147e-37
AT5G04060	0.337302	0.011433248162671	AT5G03960	-1.89913	1.28491638523031e-06
AT5G08380	1.13136	3.27490555623234e-11	AT5G08320	0.853594	5.33529069006454e-07
AT5G45190	0.353457	0.0267630193954372	AT5G45150	0.959186	0.00604857026063387
AT5G56260	0.446717	0.0133649949988796	AT5G56240	-0.219335	0.0202095968869195
AT5G63140	2.44667	8.83991226974682e-14	AT5G63110	-0.32709	0.0290595402851938
AT1G03380	-0.349712	0.000653678897303463	AT1G03310	2.63071	4.74748528714427e-103
AT1G21650	1.17075	0.000131928092981755	AT1G21610	0.438538	0.0139386106415371
AT1G65180	-2.29343	2.00621168057258e-30	AT1G65070	1.78693	1.81265489822417e-23
AT2G23150	-0.769188	0.000317418170918815	AT2G23100	0.93455	0.0393760904754668
AT2G24600	2.85683	4.64675031791423e-07	AT2G24520	1.33383	3.49370715869399e-20
AT2G25760	0.345556	0.000434361552622966	AT2G25730	-0.499285	3.9767340778697e-05
AT2G26080	1.15567	2.45102849241835e-10	AT2G26000	0.466486	0.0311240728655873
AT2G26695	3.81914	3.30049569389813e-19	AT2G26690	2.36935	9.0358059732484e-12
AT2G29090	5.60489	3.66061741036352e-23	AT2G29060	-4.19752	1.67043444180946e-50
AT2G32870	8.4884	2.65906765134821e-123	AT2G32810	0.545959	4.60701563605219e-13
AT2G35010	-0.29815	0.0259714642513146	AT2G34940	-5.50605	2.169686913175e-46
AT2G37630	1.87381	1.46213665978394e-80	AT2G37585	0.600355	9.93739816108832e-08
AT3G05430	1.11505	1.20890455173542e-10	AT3G05410	2.47571	1.61718570855907e-75
AT3G20200	1.19918	0.00483392753919368	AT3G20130	-1.40836	1.98809583968104e-08
AT3G23430	-3.75841	5.00861466442379e-78	AT3G23370	-0.681151	0.03768475411554
AT3G26240	2.15116	5.88683666544185e-59	AT3G26200	7.13023	2.83370302680337e-47
AT3G44990	-1.85777	1.02674831151689e-05	AT3G44970	4.74244	6.74893611447162e-17
AT3G45650	-2.67406	2.86592891939814e-17	AT3G45620	-1.03542	2.88225863824342e-13
AT3G46130	-2.539	7.31755056370195e-43	AT3G46090	4.10216	5.93001934883926e-13
AT3G47350	-0.297452	3.34978124537486e-06	AT3G47340	5.50478	1.69868612510841e-09
AT3G54460	1.30636	1.15728403073668e-21	AT3G54440	0.73759	8.19679802834876e-21
AT3G55250	3.65713	4.02656535860442e-163	AT3G55160	-0.555484	0.0488099497378342
AT4G13300	-6.1067	4.59128580795761e-18	AT4G13250	3.5128	1.72136943882696e-49
AT4G18210	1.282	2.27560403434043e-09	AT4G18170	1.99327	8.091922044438e-08
AT4G37650	-0.957016	1.59010615675548e-05	AT4G37580	1.25945	0.00992714871780033
AT5G02250	1.65912	1.0491654758894e-60	AT5G02180	4.23255	3.69401242541431e-49
AT5G06780	0.325538	0.00155781019935171	AT5G06700	1.50031	5.72410273117405e-18
AT5G07350	-0.756716	2.58238435606017e-05	AT5G07290	0.294742	0.0300761794139888
AT5G18440	0.736758	0.000141769259402921	AT5G18410	0.324768	0.00386043419092279
AT5G43330	0.878467	0.00015801797551759	AT5G43310	0.770696	0.000300566112449552
AT5G44260	4.3073	9.24610435901236e-61	AT5G44230	-0.472638	0.0137192108517314
AT5G46340	-0.83886	1.22665419452589e-15	AT5G46270	1.61024	6.08951270116303e-35
AT5G51230	0.518097	0.000666291908315234	AT5G51200	0.632463	0.0121483054205893
AT5G09870	0.960621	2.7544648480835e-10	AT5G09860	0.568157	5.14019436334075e-12
AT5G12420	-3.45327	7.02594076577963e-27	AT5G12400	-0.525431	3.52911234887999e-08
AT1G74850	2.73172	2.8872938630205e-116	AT1G74810	3.63025	3.11236906844807e-05
AT3G43930	-3.64655	8.40101594175275e-12	AT3G43920	0.803466	0.0055558299720929
AT5G22800	3.89267	1.41453653040704e-145	AT5G22794	0.457429	0.0238967923198563
AT1G58602	6.48534	3.72491263006463e-200	AT1G58520	0.9433	0.00984720967903111
AT5G05180	1.55315	1.71425758756693e-07	AT5G05160	-1.88851	2.47469178935531e-20
AT1G11710	-0.523145	0.0411618425071107	AT1G11700	0.998122	1.04290901774783e-05
AT3G52200	-0.88224	3.38587335833453e-13	AT3G52180	3.15425	2.95856298246463e-85
AT3G54590	-6.0337	4.92063824606526e-33	AT3G54580	-6.17958	4.65568016268486e-33
AT1G18485	3.28338	2.12240336448742e-95	AT1G18460	1.11457	4.16036237953268e-12
AT3G17850	0.538328	6.06071943954033e-06	AT3G17830	1.03879	0.00246823211293101
AT3G23580	0.981228	2.18752566171227e-09	AT3G23550	2.01496	4.53484828238072e-14
AT3G24440	-0.411887	0.00586189325945701	AT3G24430	4.49103	3.62082097639646e-104
AT4G20140	-2.42092	4.0042554129153e-33	AT4G20110	-3.67116	1.96822108123721e-52
AT1G12110	-2.1248	1.3078188887285e-15	AT1G12090	2.39202	6.21299271697486e-18
AT1G51610	1.4851	1.87706611732498e-51	AT1G51560	1.27672	1.17769853949362e-19
AT2G15090	5.50304	2.31383514899471e-117	AT2G15042	5.95142	1.05205596153275e-11
AT4G10790	0.501496	6.7553420282682e-13	AT4G10770	1.22584	0.000101871078364452
AT4G13572	7.74895	3.2528133396824e-43	AT4G13550	1.99135	8.05319993806548e-47
AT4G15233	0.964055	0.021634226872707	AT4G15230	-3.8033	1.81464285194497e-20
AT4G32250	0.802236	5.25469649905743e-06	AT4G32190	2.3865	8.41550932536161e-36
AT4G34500	0.292509	0.00365797663915195	AT4G34480	2.0898	3.33242124108032e-121
AT5G50940	1.16245	0.000401902225450875	AT5G50920	2.37385	2.22565892649025e-71
AT1G05160	0.665864	1.10626558888829e-09	AT1G05120	-0.4986	4.31504153239522e-10
AT1G53110	0.340689	0.0179448719500355	AT1G53070	-0.773085	7.57279931752846e-05
AT1G75520	-0.627201	0.017906369856393	AT1G75490	3.40687	1.17386192983072e-58
AT1G75850	-0.368963	1.53869952140117e-05	AT1G75820	0.4959	3.75319746133699e-06
AT1G80810	0.472135	0.0385460613198727	AT1G80770	1.43158	7.61762512354531e-26
AT2G04100	-2.25196	6.77707980776459e-17	AT2G04080	3.60952	1.03422622944731e-15
AT2G16980	-5.23475	1.82168547859213e-40	AT2G16950	-0.379558	1.7384476623755e-07
AT2G32850	-0.367552	0.0164482436155118	AT2G32795	2.7413	5.11876976599926e-18
AT2G36895	1.82667	5.27941088578092e-11	AT2G36880	-1.2689	6.07382844524836e-42
AT2G47460	-4.13586	4.33256928992693e-26	AT2G47440	1.45012	5.13548224760159e-09
AT3G13530	0.418347	1.49038578900499e-07	AT3G13510	0.578993	0.0171519168884789
AT3G56740	-0.692981	1.52347546816543e-08	AT3G56710	1.52825	0.000116219386948106
AT4G09640	1.00208	1.87185025784302e-07	AT4G09620	1.17884	2.41766755382168e-21
AT4G30560	-1.44128	5.45660846533061e-22	AT4G30520	-0.407635	0.0428672364640134
AT4G33880	-6.09939	2.75733247639472e-47	AT4G33800	-3.82819	2.14955403385552e-08
AT4G36360	0.460691	1.79566565860417e-05	AT4G36280	4.79	3.41448579317136e-24
AT5G08610	1.96132	3.88767447882284e-18	AT5G08560	-0.408205	4.61247103977029e-07
AT5G11110	-1.94962	1.25488448542182e-32	AT5G11060	4.13071	3.66099704448496e-90
AT5G14610	1.44336	1.16955299405637e-20	AT5G14580	-0.668459	0.038535696745212
AT5G44160	-3.24117	1.53520345285231e-92	AT5G44130	3.52094	4.34002290483807e-11
AT5G45520	4.72077	1.58830379545489e-26	AT5G45490	0.719107	0.0221499035459041
AT5G56000	-0.540696	0.00104847801490499	AT5G55930	4.97259	4.30176465123749e-81
AT5G56990	2.83435	8.76283343796589e-27	AT5G56970	-3.48809	9.61961292566477e-13
AT5G59790	0.546783	2.47051211794156e-06	AT5G59780	-2.53853	5.97495178473937e-40
AT5G64170	2.17763	6.23284152866364e-06	AT5G64080	0.674289	0.0346486131544468
AT5G43745	1.4153	4.33389493077123e-07	AT5G43660	-0.880883	0.0208188827624125
AT1G48210	-0.755455	0.000533152157526636	AT1G48110	-0.318986	0.0055281292149638
AT2G17820	-0.580343	0.00305343140010116	AT2G17760	-1.01856	2.11935860658073e-11
AT5G54100	-0.722826	6.13053932182283e-05	AT5G54050	-5.60894	8.33763914908416e-11
AT1G07705	0.436735	8.09278169222966e-06	AT1G07650	1.45981	8.55221078151769e-14
AT4G35250	4.92444	7.52037188927852e-215	AT4G35160	-4.01068	3.32827560215903e-19
AT3G05040	-0.380385	0.0072670085460063	AT3G04980	0.651703	0.00244336124800012
AT1G05620	-1.09016	3.11133841514869e-17	AT1G05570	-2.51135	3.66979801142432e-35
AT1G05805	0.921817	8.02116810180438e-17	AT1G05780	0.600188	0.000423250827514059
AT1G08465	7.95437	7.19363478852092e-85	AT1G08430	-4.5922	1.15467729289766e-60
AT1G17650	3.34228	5.0967583599559e-113	AT1G17590	-1.66098	2.45341306981345e-15
AT1G21650	1.17075	0.000131928092981755	AT1G21610	0.438538	0.0139386106415371
AT1G30410	0.855141	0.00415610894190424	AT1G30380	6.99478	5.9774815490012e-254
AT1G51340	1.03823	9.57662656655799e-05	AT1G51270	-3.19419	4.15089744788325e-56
AT1G53170	2.34578	1.03050445956043e-15	AT1G53160	5.64031	5.10122079903222e-31
AT1G56520	6.81212	1.85283684800453e-72	AT1G56500	4.0111	3.33265162847515e-131
AT1G63690	0.474601	1.51161850848892e-06	AT1G63670	0.557861	0.00208393350192373
AT1G66730	1.1752	2.48695124163037e-18	AT1G66690	-2.07017	0.00154858655887601
AT1G70620	0.51772	0.021967053336565	AT1G70580	1.01613	9.74785097607289e-05
AT1G76520	0.435768	0.0176935382322764	AT1G76470	-4.10994	3.55463168031071e-07
AT2G45460	0.440571	0.000466929547027478	AT2G45420	-2.78096	7.20867446078499e-08
AT2G46440	6.00871	3.72912533608907e-39	AT2G46380	2.24083	2.74050129469884e-11
AT3G08620	0.320468	0.0291067496429016	AT3G08550	-0.210906	0.013440846389898
AT3G46400	-5.59772	2.67519618637992e-12	AT3G46330	-6.21046	3.45338698747857e-31
AT4G00240	-1.58064	1.38929237104514e-22	AT4G00220	-1.67065	1.73356579301056e-07
AT5G07340	0.260857	0.0107007252236122	AT5G07290	0.294742	0.0300761794139888
AT5G43470	4.36539	5.9774815490012e-254	AT5G43400	-2.52347	2.09932033917566e-53
AT5G46450	3.11682	4.58910981028654e-48	AT5G46390	2.3193	1.25900802609112e-81
AT5G49650	0.339205	0.000291923283847592	AT5G49580	0.528708	0.00118936382009546
AT4G21400	-0.667434	0.00545484596958505	AT4G21390	-2.40617	3.84222881805143e-19
AT3G53540	1.47729	6.52537489558702e-18	AT3G53520	-0.462249	0.000523567325967248
AT2G47830	-0.423019	0.00791737248736844	AT2G47800	-2.44125	2.93152342044696e-25
AT5G38420	7.95378	4.21861123925607e-170	AT5G38410	7.83776	1.68463897626054e-161
AT5G11540	-2.96172	2.25871611550645e-07	AT5G11530	0.341802	0.00647053452485866
AT5G23570	0.931494	3.5492749332841e-15	AT5G23520	-0.708183	1.25074415872706e-05
AT5G49680	-3.66699	1.46694606284317e-62	AT5G49665	-0.762201	6.67594269827324e-06
AT4G30280	-1.11203	3.64448004777676e-15	AT4G30270	1.42774	0.0103109431096628
AT1G22403	0.630505	0.000465152177036761	AT1G22400	1.07901	2.05875454788727e-09
AT5G03910	1.75435	4.56138799558658e-36	AT5G03900	1.761	9.44011809906233e-68
AT5G01260	1.11359	0.000197644487214671	AT5G01240	1.29767	0.00176078052850455
AT1G22403	0.630505	0.000465152177036761	AT1G22370	2.03553	1.55621272978971e-08
AT1G71960	-1.62407	1.10967791932226e-09	AT1G71940	-0.959843	5.07852202570808e-11
AT1G14040	-2.9639	4.82657584458903e-17	AT1G14020	-0.316098	0.00373932955057217
AT4G39400	0.774685	5.72867876007619e-10	AT4G39390	-1.1651	1.27702699492659e-13
AT1G76600	1.5018	8.3622188309737e-06	AT1G76590	-1.73328	1.07693437259799e-24
AT2G04030	2.02402	2.21333132044736e-12	AT2G03980	3.1564	1.64158317416389e-57
AT2G29360	7.03195	1.43915445795752e-115	AT2G29300	6.08807	9.13986896339878e-54
AT3G18010	7.29581	2.27089192242883e-20	AT3G17970	0.841072	8.94531187525329e-24
AT5G43870	3.50168	1.19243174015189e-61	AT5G43850	1.24922	1.88079827188674e-07
AT1G22065	-5.35196	2.02365426323559e-25	AT1G22060	0.63585	6.75254127288528e-12
AT1G65080	-0.36606	0.0432899566510181	AT1G65060	2.36547	4.90207870025058e-14
AT3G16360	4.31246	2.59967473900237e-17	AT3G16340	-2.47987	1.37364253743833e-57
AT1G47640	-0.779128	1.45021629453043e-09	AT1G47603	-3.92928	4.46669837208827e-07
AT1G51870	-4.99841	6.17323042450743e-13	AT1G51805	7.1917	1.37600524771529e-223
AT1G52070	-5.26387	1.55271875687272e-08	AT1G52030	3.1137	1.73966944702751e-06
AT1G56550	-4.21576	6.53366138755914e-15	AT1G56500	4.0111	3.33265162847515e-131
AT1G64780	-2.73606	2.109725229623e-10	AT1G64710	5.06858	7.67517054352852e-66
AT2G20570	7.42715	1.12602363736407e-187	AT2G20550	-1.62481	1.80055781203086e-06
AT2G24850	3.25011	0.000661165291568242	AT2G24790	2.26915	1.49495419345918e-62
AT2G29940	5.6035	1.67481282677257e-69	AT2G29890	0.527832	0.0289226347822074
AT2G36630	6.65115	9.36778399894412e-105	AT2G36590	3.28254	2.55496130825313e-15
AT3G14560	-1.23737	2.72656559045528e-09	AT3G14510	-5.00381	8.41779478353096e-09
AT3G19930	-1.30653	3.97771968175698e-07	AT3G19900	1.56441	2.89323868314059e-13
AT3G21295	-0.493679	0.000331763465854009	AT3G21260	-1.01011	1.18423838171617e-08
AT3G23470	-5.87001	8.46119185514782e-20	AT3G23410	2.82235	4.2508862878758e-102
AT3G47810	-0.535564	7.03345753038847e-06	AT3G47760	-5.23565	3.72936009656541e-08
AT3G55120	2.32675	6.92022087084781e-08	AT3G55080	1.51022	2.81781659218697e-34
AT3G59420	1.72512	7.53119309471384e-15	AT3G59410	0.623349	7.84369318214983e-11
AT4G01210	0.704944	2.29206717705595e-05	AT4G01140	-3.81479	1.95107148294798e-15
AT4G01610	-1.72075	3.04339341899794e-17	AT4G01580	3.03448	3.22155058899385e-34
AT4G14560	1.9175	1.41943416515898e-06	AT4G14540	4.56001	2.22085001041563e-63
AT4G16130	0.684636	1.58234002885509e-08	AT4G16110	-1.17421	3.02725849923445e-13
AT4G18550	-3.36545	5.71379377225386e-24	AT4G18520	1.57943	2.29728394783968e-11
AT4G27340	2.26192	5.09440029827104e-40	AT4G27290	-4.145	2.41067158694016e-29
AT5G03960	-1.89913	1.28491638523031e-06	AT5G03900	1.761	9.44011809906233e-68
AT5G43310	0.770696	0.000300566112449552	AT5G43270	1.3807	6.03500575113573e-23
AT5G61980	-1.47523	1.14136370702174e-19	AT5G61950	0.812791	0.016456391395038
AT4G33810	-0.424439	0.0077331930417296	AT4G33720	-5.3588	4.71292396416892e-16
AT5G60940	0.776907	1.96657031447432e-05	AT5G60910	3.66955	9.02670696473915e-05
AT3G14205	0.630687	3.08883129352467e-06	AT3G14172	-0.878755	4.21444985838944e-08
AT5G45220	-3.89996	3.52416060561697e-21	AT5G45150	0.959186	0.00604857026063387
AT3G19820	0.374445	0.000346964420273692	AT3G19710	1.63065	0.000573455521240331
AT1G16750	4.39199	2.35278432357853e-124	AT1G16700	-0.789389	2.15353536260751e-05
AT1G08820	-0.594241	0.00206456068027687	AT1G08760	-0.294392	0.0295137984725827
AT1G67020	-2.30215	0.00105409508265609	AT1G66950	-5.02397	7.42142954142439e-14
AT2G20050	0.923022	5.10253336925847e-13	AT2G20000	0.325994	0.0363002968467383
AT4G02410	0.983804	0.000715387719499797	AT4G02350	0.344947	0.000214730793563632
AT5G12340	-5.05852	8.42220445781956e-15	AT5G12290	-0.488363	4.53506404809942e-06
AT5G13530	-0.300733	0.00363645703745587	AT5G13490	-0.897806	2.62741992863995e-07
AT3G48310	9.15888	2.91192112995899e-53	AT3G48280	1.53376	0.0137741491081283
AT2G42200	4.74874	3.40463135869241e-40	AT2G42190	1.6847	2.78788351236266e-27
AT3G10470	-3.08412	3.7630381179685e-13	AT3G10420	2.34309	6.79219784901263e-32
AT4G39190	-0.748459	0.0163667252271502	AT4G39180	0.388232	0.00927640016418426
AT4G18570	2.50505	2.90640538258764e-119	AT4G18550	-3.36545	5.71379377225386e-24
AT5G19070	0.831341	2.47106059134713e-05	AT5G19050	-0.858445	1.48684963229048e-05
AT2G46410	-1.18102	1.16893957372546e-05	AT2G46380	2.24083	2.74050129469884e-11
AT1G49750	5.70623	7.766924372366e-158	AT1G49730	3.06561	1.21407088421478e-207
AT4G33780	-0.957685	2.59012499920394e-20	AT4G33770	-0.867048	0.00478647509271968
AT5G35732	-2.31035	4.98388881925219e-09	AT5G35730	-0.739965	5.75579100381295e-14
AT5G56050	-1.48191	0.000564083699372897	AT5G56040	-1.8675	4.38385861482166e-61
AT1G70300	-1.13446	6.71875579523552e-06	AT1G70290	0.906768	2.16781578777228e-07
AT4G20010	1.56951	2.59080710550597e-55	AT4G19985	3.23768	1.15541452802095e-38
AT5G43500	0.530152	0.00021164476164748	AT5G43470	4.36539	5.9774815490012e-254
AT1G01250	4.20671	9.66987800908697e-13	AT1G01220	0.426658	0.0215666934633682
AT2G24280	2.68375	1.63039227559844e-177	AT2G24260	-3.36031	1.07159966559149e-36
AT2G42580	1.46886	3.67538541984551e-10	AT2G42570	-2.47916	9.57893368774146e-72
AT4G10150	6.40837	1.45928372576551e-35	AT4G10120	4.04222	8.3128150084247e-57
AT4G13940	-0.942985	6.88691452427064e-08	AT4G13930	-1.13228	1.83767400925392e-40
AT4G25300	0.485041	0.016672662235265	AT4G25240	-1.54298	5.83212404763853e-12
AT5G11580	1.12557	1.43898773460412e-32	AT5G11560	-0.789255	6.61600917784535e-15
AT1G59660	-0.790388	1.35296364808374e-06	AT1G59620	3.17175	1.46968364765888e-30
AT3G06250	0.242781	0.0193342723415215	AT3G06200	0.516738	0.00575887382027413
AT3G11670	2.41477	1.59875056437199e-94	AT3G11620	0.835684	1.03558484267212e-13
AT3G13740	1.94859	6.45428072272656e-63	AT3G13690	1.40344	2.00951294098924e-11
AT3G18660	-1.19	0.0295611232925971	AT3G18610	-1.98399	3.10471353878076e-07
AT3G45400	-0.415742	0.00947874359428079	AT3G45310	-2.01332	9.56512920199079e-47
AT4G09640	1.00208	1.87185025784302e-07	AT4G09620	1.17884	2.41766755382168e-21
AT4G20210	-4.96853	1.81697467274732e-29	AT4G20160	-4.08926	3.95053035748034e-05
AT5G22690	0.69354	0.000265983017807722	AT5G22640	2.77033	1.93275222118551e-33
AT5G24430	-0.689959	2.24421211430638e-08	AT5G24410	-6.42373	3.30872713007588e-29
AT5G36220	1.44412	1.89293765254528e-19	AT5G36170	2.57527	1.68154344096476e-84
AT5G36220	1.44412	1.89293765254528e-19	AT5G36180	-5.762	1.79759422312145e-38
AT5G54800	-1.59998	1.62014259485992e-53	AT5G54770	4.86962	2.39506355712751e-122
AT5G63870	0.559608	9.43771414469099e-07	AT5G63850	-1.25863	7.14743777972863e-08
AT1G15310	-1.72742	7.97560343422516e-36	AT1G15240	0.392317	0.0165111911145267
AT5G35840	0.412566	0.000350414950304368	AT5G35790	4.60347	2.00305455841723e-233
AT3G46970	2.87743	7.33551196859014e-43	AT3G46930	-1.12086	5.24830956053869e-07
AT1G24460	-0.187352	0.0049249571388458	AT1G24360	0.375082	8.78317528420911e-05
AT1G67500	-1.03578	5.81599355284701e-06	AT1G67460	0.867474	0.0300367359667032
AT1G68530	5.52404	1.20386303610506e-48	AT1G68470	-0.781448	0.00874157821781382
AT3G07210	0.810793	0.00106270066928218	AT3G07170	0.183943	0.0449514347410246
AT3G54500	4.01449	2.29201793194006e-73	AT3G54460	1.30636	1.15728403073668e-21
AT3G57520	1.64633	2.79053380616286e-05	AT3G57470	1.56174	7.76338793342499e-27
AT5G46290	0.896844	1.08146667730689e-11	AT5G46260	-1.88013	3.0444618742031e-08
AT4G36550	0.772752	0.000642847522190185	AT4G36540	4.18347	3.77588540173566e-87
AT5G42710	-1.57104	1.54929961258641e-07	AT5G42690	-2.35192	1.11057037032742e-56
AT3G44680	-0.357508	0.00873669119517193	AT3G44670	1.40838	4.22078020228016e-07
AT4G24100	-1.19399	6.88333160793028e-28	AT4G24080	-1.99276	1.18576318641101e-10
AT1G74710	1.50309	1.08861109660181e-17	AT1G74690	0.445271	0.0498217774794216
AT4G23570	1.57992	5.78119441800616e-11	AT4G23550	-1.38113	0.0055959412358176
AT1G66980	7.38135	0	AT1G66960	-3.92277	8.31383842294798e-06
AT3G23760	6.14999	3.1090965567004e-86	AT3G23740	0.461299	0.0378323224008369
AT4G15530	2.46844	2.06049950208947e-24	AT4G15500	-1.96172	5.00222497010575e-24
AT5G22780	-0.220304	0.0392847883573017	AT5G22770	-0.307172	0.000562850769522665
AT3G07550	0.470195	0.00031617238056497	AT3G07490	-4.78264	3.34253218148038e-09
AT3G12915	2.47122	5.02362497205397e-15	AT3G12900	-6.2989	4.12206870265161e-25
AT3G20630	-0.302548	0.00113508029086075	AT3G20590	-5.4673	3.49225128301586e-26
AT3G49260	8.03794	1.08164056107214e-69	AT3G49220	1.45829	1.61193831751811e-23
AT3G54440	0.73759	8.19679802834876e-21	AT3G54400	1.62856	9.71334315997965e-15
AT4G03100	0.820344	0.00368874007673472	AT4G03080	0.652841	2.81119863415539e-19
AT5G15650	-1.76584	1.82375904246408e-90	AT5G15630	-1.91631	1.74258050399356e-07
AT5G22780	-0.220304	0.0392847883573017	AT5G22770	-0.307172	0.000562850769522665
AT5G27270	0.732346	1.00205881905164e-09	AT5G27220	3.31282	1.06707853587284e-17
AT1G29750	1.33128	1.48074372786493e-19	AT1G29720	7.86812	8.12592174348921e-20
AT1G30450	-0.416249	0.000106608465076106	AT1G30410	0.855141	0.00415610894190424
AT1G61560	-4.43037	2.98192249812779e-47	AT1G61500	1.16092	1.60592835920415e-10
AT1G66730	1.1752	2.48695124163037e-18	AT1G66670	2.2719	2.28883204904083e-45
AT1G73960	0.47446	0.00967164577700594	AT1G73920	1.03427	8.12346493045328e-15
AT2G23890	-0.8406	5.00065433334748e-21	AT2G23840	4.59354	2.81097616474796e-62
AT2G25140	-0.888456	5.7815581793991e-16	AT2G25100	0.909509	0.00715400842213824
AT2G42850	-4.77827	9.88390779498368e-20	AT2G42800	5.2475	2.00018555552014e-45
AT3G02260	-0.495919	0.0385927388656337	AT3G02220	0.270506	0.0405310068170224
AT3G27325	-0.46203	7.23640361393302e-05	AT3G27280	-0.632496	4.17191670124269e-05
[truncated: 2 more rows]
