# Supplementary material for: Polycomb-dependent differential chromatin compartmentalization determines gene coregulation in Arabidopsis
Source: HighWire-hosted journal article supplement (doi:10.1101/gr.273771.120), 2021-06-03
Supplement: Supplemental_Table_S12.xlsx [file Supplemental_Table_S12.xlsx]

## Sheet: S12
Supplementary Table S12: C-Hi-C_Shoot_vs_Root
chr(1)	start(1)	end(1)	Gene_1	strand(1)	Total Reads(1)	chr(2)	start(2)	end(2)	Gene_1	strand(2)	Total Reads(2)	Probe_Gene1	Probe_Gene2	Distance	Interaction Reads	Expected Reads	Z-score	LogP	FDR(Benjamini, based on 2.84e+10 total tests)	Bg Interaction Reads	Bg Expected Reads	Bg Z-score	Bg LogP	Bg Total Reads Peak1	Bg Total Reads Peak2	LogP vs. Bg	Z-score Difference vs. Bg	Circos Thickness	RNA_seq_LFC1	pval1	RNA_seq_LFC2	pval2
1	27654612	27655112	AT1G73580	+	1721	1	27648010	27648510	AT1G73580	+	178	Yes	NA	6602	16	0.070444	1600	-32.224	0	15	0.070444	1500	-29.3777	1454	174	-0.618049	100	12	-5.52389	8.54e-26	3.56773	1.76e-11
3	285134	285634	AT3G01790	+	90	3	274063	274563	AT3G01790	+	1185	NA	Yes	11071	7	0.070444	700	-9.56977	1	3	0.070444	300	-2.53893	69	1175	-2.53306	400	2	NA	NA	-5.26206	2.95e-17
1	19294000	19294500	AT1G51920	+	1547	1	19277925	19278425	AT1G51920	+	781	Yes	Yes	16075	10	0.070444	1000	-16.0567	0.029866	7	0.070444	700	-9.41537	1695	713	-1.30836	300	6	NA	NA	-2.8958	4.27e-14
1	6525149	6525649	AT1G18890	+	1638	1	6510564	6511064	AT1G18890	+	82	Yes	NA	14585	11	0.070444	1100	-18.9995	0.001968	8	0.070444	800	-11.7664	1335	80	-1.28536	300	6	NA	NA	-4.41506	9.76e-47
1	23246510	23247010	AT1G62770	+	1209	1	23231105	23231605	AT1G62770	+	90	Yes	NA	15405	7	0.070444	700	-9.56977	1	3	0.070444	300	-2.53491	1425	90	-2.51965	400	2	-3.97259	1.03e-51	NA	NA
2	169468	169968	AT2G01370	+	955	2	165430	165930	AT2G01370	+	105	Yes	NA	4038	18	0.070444	1800	-38.7287	0	6	0.070444	600	-7.53864	822	96	-9.31312	1200	-14	NA	NA	NA	NA
1	17606519	17607019	AT1G47813	+	38	1	17603509	17604009	AT1G47813	+	1289	NA	Yes	3010	7	0.070444	700	-9.83019	1	6	0.070444	600	-7.55971	81	1241	-0.578875	100	2	NA	NA	NA	NA
2	8073551	8074051	AT2G18600	+	744	2	8051122	8051622	AT2G18600	+	1322	Yes	Yes	22429	6	0.070444	600	-7.44224	1	1	0.070444	100	-0.458392	1100	1027	-5.61646	500	2	-0.731607	0.0227157	NA	NA
1	3876377	3876877	AT1G11540	+	203	1	3870007	3870507	AT1G11540	+	1438	NA	Yes	6370	11	0.070444	1100	-18.6443	0.002637	7	0.070444	700	-9.4708	202	1216	-1.79638	400	6	-5.10966	2.31e-58	-2.32697	3.07e-05
2	14504570	14505070	AT2G34357	+	119	2	14485060	14485560	AT2G34357	+	1235	NA	Yes	19510	6	0.070444	600	-7.51686	1	3	0.070444	300	-2.53314	104	1194	-1.70239	300	2	NA	NA	NA	NA
1	25653975	25654475	AT1G68420	+	78	1	25648424	25648924	AT1G68420	+	823	NA	Yes	5551	7	0.070444	700	-9.59786	1	4	0.070444	400	-4.01847	61	626	-1.56342	300	2	NA	NA	1.75675	1.58e-23
2	13411601	13412101	AT2G31490	+	1533	2	13407049	13407549	AT2G31490	+	264	NA	Yes	4552	16	0.070444	1600	-32.0199	0	6	0.070444	600	-7.47035	1139	248	-6.73052	1000	12	NA	NA	NA	NA
1	3822073	3822573	AT1G11360	+	1663	1	3817549	3818049	AT1G11360	+	75	Yes	NA	4524	26	0.070444	2600	-66.8247	0	11	0.070444	1100	-19.3284	1326	54	-10.9977	1500	-26	NA	NA	3.0341	7.01e-71
2	14842508	14843008	AT2G35230	+	62	2	14837099	14837599	AT2G35230	+	623	NA	Yes	5409	6	0.070444	600	-7.60166	1	2	0.070444	200	-1.33096	43	610	-3.02912	400	2	NA	NA	-2.10796	7.68e-09
3	412486	412986	AT3G02220	+	90	3	394413	394913	AT3G02220	+	1221	NA	Yes	18073	8	0.070444	800	-11.7343	1	2	0.070444	200	-1.33091	76	1331	-5.5424	600	4	0.270506	0.040531	0.485271	0.013554
1	6611190	6611690	AT1G19140	+	505	1	6602523	6603023	AT1G19140	+	57	Yes	NA	8667	6	0.070444	600	-7.61756	1	2	0.070444	200	-1.33094	438	51	-3.01502	400	2	NA	NA	NA	NA
1	24360619	24361119	AT1G65520	+	124	1	24357390	24357890	AT1G65520	+	751	Yes	Yes	3229	9	0.070444	900	-13.9331	0.227615	3	0.070444	300	-2.52919	160	632	-4.50078	600	4	-1.58707	0.000105774	2.97879	1.98e-06
1	25262945	25263445	AT1G67430	+	72	1	25255195	25255695	AT1G67430	+	1446	NA	Yes	7750	7	0.070444	700	-9.61557	1	1	0.070444	100	-0.455603	95	1135	-7.53983	600	-2	NA	NA	-1.00395	1.7e-15
1	29637592	29638092	AT1G78830	+	341	1	29634520	29635020	AT1G78830	+	526	NA	Yes	3072	13	0.070444	1300	-23.676	2.2e-05	4	0.070444	400	-3.97477	300	467	-7.09658	900	-8	1.46166	6.8e-07	7.243	6.03e-262
3	1223484	1223984	AT3G04540	+	1718	3	1219976	1220476	AT3G04540	+	571	Yes	Yes	3508	14	0.070444	1400	-26.2611	2e-06	12	0.070444	1200	-20.9923	1420	659	-0.857947	200	10	NA	NA	NA	NA
1	29518077	29518577	AT1G78460	+	208	1	29504966	29505466	AT1G78460	+	938	NA	Yes	13111	6	0.070444	600	-7.47852	1	4	0.070444	400	-3.98237	177	841	-0.991137	200	2	3.5256	5.34e-44	-0.511014	0.000103576
1	249983	250483	AT1G01690	+	1169	1	242034	242534	AT1G01690	+	1387	Yes	Yes	7949	22	0.083853	1848.19	-49.6081	0	14	0.090582	1088.75	-26.1887	1191	1452	-4.12621	759.442	18	NA	NA	-2.55323	1.97e-07
2	17934944	17935444	AT2G43140	+	657	2	17926964	17927464	AT2G43140	+	64	Yes	NA	7980	8	0.070444	800	-11.8395	1	6	0.070444	600	-7.59602	635	64	-0.932503	200	4	-1.37585	0.0245385	-1.4473	2.91e-05
2	17999015	17999515	AT2G43320	+	86	2	17988605	17989105	AT2G43320	+	1249	NA	Yes	10410	8	0.070444	800	-11.7462	1	3	0.070444	300	-2.53536	87	1397	-3.4775	500	4	-0.778584	5.23e-07	NA	NA
2	11059545	11060045	AT2G25930	+	1005	2	11055083	11055583	AT2G25930	+	85	Yes	NA	4462	13	0.070444	1300	-24.3077	1.2e-05	7	0.070444	700	-9.59003	871	81	-3.09328	600	8	-0.47526	0.00088585	0.544577	3.41e-06
1	20155099	20155599	AT1G54000	+	623	1	20148443	20148943	AT1G54000	+	610	Yes	Yes	6656	9	0.070444	900	-13.7443	0.261383	3	0.070444	300	-2.52422	575	509	-4.45241	600	4	-5.58652	2.26e-43	NA	NA
2	1132111	1132611	AT2G03720	+	973	2	1130514	1131014	AT2G03720	+	213	Yes	Yes	1597	41	0.070444	4100	-118.944	0	21	0.070444	2100	-47.4715	893	175	-10.0559	2000	-46	-5.46429	2.26e-29	3.44769	5.3e-32
2	9976344	9976844	AT2G23430	+	377	2	9974528	9975028	AT2G23430	+	60	Yes	NA	1816	10	0.070444	1000	-16.6583	0.018329	5	0.070444	500	-5.73888	363	51	-2.846	500	6	0.88676	2.56e-05	1.04739	1.41e-05
1	1594516	1595016	AT1G05430	+	114	1	1584836	1585336	AT1G05430	+	939	NA	Yes	9680	9	0.070444	900	-13.9544	0.224517	2	0.070444	200	-1.33092	63	837	-7.07997	700	-4	0.796985	7.37e-18	-1.32336	0.000104378
1	18226385	18226885	AT1G49260	+	1467	1	18216508	18217008	AT1G49260	+	116	Yes	NA	9877	8	0.070444	800	-11.6776	1	1	0.070444	100	-0.455571	1718	94	-9.56204	700	-4	NA	NA	-1.63266	3.31e-06
1	18991478	18991978	AT1G51220	+	1185	1	18984205	18984705	AT1G51220	+	90	Yes	NA	7273	7	0.070444	700	-9.56977	1	4	0.070444	400	-4.00745	1224	76	-1.55804	300	2	NA	NA	NA	NA
1	27479020	27479520	AT1G73060	+	1103	1	27465532	27466032	AT1G73060	+	73	Yes	NA	13488	6	0.070444	600	-7.57462	1	2	0.070444	200	-1.33093	994	54	-3.01086	400	2	3.12922	7.59e-64	-0.789413	0.0322452
3	83006	83506	AT3G01270	+	87	3	74425	74925	AT3G01270	+	1143	NA	Yes	8581	9	0.070444	900	-14.0374	0.211969	4	0.070444	400	-3.99973	92	944	-3.05352	500	4	NA	NA	-3.46012	3.02e-49
2	17397483	17397983	AT2G41705	+	109	2	17395082	17395582	AT2G41705	+	572	NA	Yes	2401	8	0.070444	800	-11.6902	1	3	0.070444	300	-2.53602	83	823	-3.48163	500	4	0.287177	0.0375636	-0.20774	0.00727362
1	2255390	2255890	AT1G07340	+	1450	1	2249103	2249603	AT1G07340	+	46	Yes	NA	6287	8	0.070444	800	-11.9873	1	2	0.070444	200	-1.33095	1389	48	-5.63426	600	4	NA	NA	4.2346	2.58e-74
1	12180943	12181443	AT1G33600	+	1585	1	12168940	12169440	AT1G33600	+	123	Yes	NA	12003	14	0.070444	1400	-26.7884	1e-06	9	0.070444	900	-13.9544	1342	114	-2.16124	500	10	4.97643	5.67e-141	-0.96305	8.43e-05
2	12777464	12777964	AT2G29970	+	57	2	12768102	12768602	AT2G29970	+	661	NA	Yes	9362	7	0.070444	700	-9.677	1	0	0.070444	0	1.00974	52	595	1.00974	700	2	NA	NA	NA	NA
2	8064476	8064976	AT2G18570	+	92	2	8051059	8051559	AT2G18570	+	1322	NA	Yes	13417	9	0.070444	900	-14.0182	0.214881	3	0.070444	300	-2.53694	78	1027	-4.57866	600	4	-1.10954	0.00101368	NA	NA
3	13490	13990	AT3G01050	+	131	3	8979	9479	AT3G01050	+	1481	NA	Yes	4511	26	0.070444	2600	-64.6956	0	9	0.070444	900	-14.0686	80	1254	-13.5367	1700	-24	NA	NA	-0.261297	0.00629806
1	24045468	24045968	AT1G64710	+	707	1	24033408	24033908	AT1G64710	+	1404	Yes	Yes	12060	8	0.070444	800	-11.5187	1	1	0.070444	100	-0.458182	590	1090	-9.4199	700	-4	5.06858	7.68e-66	2.82935	2.17e-10
1	28371002	28371502	AT1G75560	+	51	1	28352450	28352950	AT1G75560	+	1955	NA	Yes	18552	6	0.070444	600	-7.64097	1	0	0	0	0	0	0	0	600	2	NA	NA	-0.627201	0.0179064
1	6245495	6245995	AT1G18150	+	184	1	6240979	6241479	AT1G18150	+	774	Yes	Yes	4516	11	0.070444	1100	-18.6684	0.002584	1	0.070444	100	-0.45694	168	613	-16.2316	1000	-6	-0.320004	0.0117015	-3.57713	1.8e-09
2	17294359	17294859	AT2G41473	+	1240	2	17284972	17285472	AT2G41473	+	72	Yes	NA	9387	6	0.070444	600	-7.57672	1	3	0.070444	300	-2.54607	1102	49	-1.71876	300	2	NA	NA	NA	NA
2	13436959	13437459	AT2G31560	+	2021	2	13416917	13417417	AT2G31560	+	47	Yes	NA	20042	6	0.070444	600	-7.66008	1	1	0.070444	100	-0.450296	1796	35	-5.80148	500	2	2.82824	3.81e-16	0.256547	0.00992799
2	17791948	17792448	AT2G42740	+	326	2	17790592	17791092	AT2G42740	+	806	NA	Yes	1356	18	0.070444	1800	-37.7686	0	7	0.070444	700	-9.46191	228	785	-7.16878	1100	-14	NA	NA	NA	NA
2	19229897	19230397	AT2G46780	+	74	2	19210063	19210563	AT2G46780	+	1730	NA	Yes	19834	9	0.070444	900	-14.1002	0.2023	0	0	0	0	0	0	0	900	4	NA	NA	-5.48863	2.85e-43
1	5441447	5441947	AT1G15800	+	83	1	5435642	5436142	AT1G15800	+	996	NA	Yes	5805	8	0.070444	800	-11.7559	1	3	0.070444	300	-2.5451	51	965	-3.53995	500	4	NA	NA	NA	NA
1	4556902	4557402	AT1G13300	+	766	1	4547474	4547974	AT1G13300	+	68	Yes	NA	9428	6	0.070444	600	-7.58578	1	4	0.070444	400	-4.01669	688	63	-0.991303	200	2	NA	NA	-0.743432	0.000158069
1	21930830	21931330	AT1G59670	+	797	1	21928078	21928578	AT1G59670	+	149	Yes	Yes	2752	7	0.070444	700	-9.49873	1	1	0.070444	100	-0.456245	778	120	-7.51611	600	-2	NA	NA	-0.790388	1.35e-06
2	7575544	7576044	AT2G17442	+	76	2	7564474	7564974	AT2G17442	+	1801	NA	Yes	11070	10	0.070444	1000	-16.5144	0.020815	4	0.070444	400	-4.00993	72	1611	-4.01312	600	6	1.93596	2.08e-07	-2.31224	2.4e-37
1	22744999	22745499	AT1G61630	+	1327	1	22738421	22738921	AT1G61630	+	69	Yes	NA	6578	10	0.070444	1000	-16.5686	0.019864	3	0.070444	300	-2.54891	1349	44	-5.97874	700	6	NA	NA	NA	NA
1	26409091	26409591	AT1G70120	+	651	1	26396460	26396960	AT1G70120	+	946	NA	Yes	12631	6	0.070444	600	-7.44423	1	4	0.070444	400	-3.96992	542	848	-0.991116	200	2	NA	NA	NA	NA
1	24495064	24495564	AT1G65850	+	1340	1	24469484	24469984	AT1G65850	+	1385	Yes	Yes	25580	7	0.09598	513.757	-9.40524	1	2	0.08132	173.251	-1.33089	1250	1242	-2.9468	340.507	2	-3.47514	2.96e-08	4.74639	6.44e-14
1	20456988	20457488	AT1G54860	+	95	1	20451620	20452120	AT1G54860	+	1492	NA	Yes	5368	10	0.070444	1000	-16.4092	0.02266	6	0.070444	600	-7.55971	81	1249	-1.93321	400	6	NA	NA	NA	NA
1	23635953	23636453	AT1G63720	+	87	1	23618505	23619005	AT1G63720	+	1324	NA	Yes	17448	7	0.070444	700	-9.57604	1	3	0.070444	300	-2.5426	57	1095	-2.54546	400	2	-1.66488	7.15e-08	0.474601	1.51e-06
2	17520633	17521133	AT2G41970	+	58	2	17501943	17502443	AT2G41970	+	1758	NA	Yes	18690	6	0.070444	600	-7.61415	1	4	0.070444	400	-4.02038	59	1656	-0.99133	200	2	-5.63634	9.51e-47	NA	NA
1	24423622	24424122	AT1G65670	+	1262	1	24417116	24417616	AT1G65670	+	139	Yes	NA	6506	8	0.070444	800	-11.6456	1	4	0.070444	400	-3.99324	1169	112	-2.23622	400	4	NA	NA	NA	NA
2	18173592	18174092	AT2G43880	+	49	2	18161844	18162344	AT2G43880	+	1824	NA	Yes	11748	6	0.070444	600	-7.65012	1	2	0.070444	200	-1.33094	52	1602	-3.01357	400	2	-5.59007	3.7e-38	-0.676514	1.66e-06
1	29709405	29709905	AT1G78980	+	119	1	29702947	29703447	AT1G78980	+	1091	Yes	Yes	6458	14	0.070444	1400	-26.8118	1e-06	2	0.070444	200	-1.3309	124	877	-15.8598	1200	-10	NA	NA	2.42318	2.64e-30
2	17252423	17252923	AT2G41380	+	1838	2	17231136	17231636	AT2G41380	+	188	Yes	NA	21287	13	0.070444	1300	-23.8411	1.9e-05	2	0.070444	200	-1.3309	1637	185	-13.7592	1100	-8	-2.69218	7.82e-33	NA	NA
2	13788974	13789474	AT2G32480	+	84	2	13783972	13784472	AT2G32480	+	929	NA	Yes	5002	11	0.070444	1100	-18.9849	0.001993	1	0.070444	100	-0.454561	71	804	-16.552	1000	-6	2.5731	1.29e-79	NA	NA
1	19311517	19312017	AT1G51960	+	106	1	19294927	19295427	AT1G51960	+	836	NA	Yes	16590	8	0.070444	800	-11.696	1	4	0.070444	400	-4.00419	82	727	-2.24979	400	4	NA	NA	NA	NA
1	22223128	22223628	AT1G60270	+	683	1	22215077	22215577	AT1G60270	+	72	Yes	NA	8051	8	0.070444	800	-11.7987	1	2	0.070444	200	-1.33092	719	70	-5.55558	600	4	1.03543	0.00451182	NA	NA
1	22272990	22273490	AT1G60450	+	1560	1	22247900	22248400	AT1G60450	+	482	Yes	Yes	25090	8	0.070444	800	-11.5329	1	1	0.070444	100	-0.458	1482	431	-9.42961	700	-4	NA	NA	-1.94845	5.65e-25
1	27654928	27655428	AT1G73580	+	786	1	27649530	27650030	AT1G73580	+	206	Yes	NA	5398	11	0.070444	1100	-18.6409	0.002644	7	0.070444	700	-9.47574	760	190	-1.7978	400	6	-5.52389	8.54e-26	NA	NA
1	6524593	6525093	AT1G18890	+	907	1	6517421	6517921	AT1G18890	+	43	Yes	NA	7172	8	0.070444	800	-12.025	1	5	0.070444	500	-5.75353	945	46	-1.47404	300	4	NA	NA	NA	NA
1	23246407	23246907	AT1G62770	+	1209	1	23234034	23234534	AT1G62770	+	57	Yes	NA	12373	7	0.070444	700	-9.677	1	1	0.070444	100	-0.452169	1425	45	-7.67099	600	-2	-3.97259	1.03e-51	3.521	6.9e-281
1	3888948	3889448	AT1G11580	+	1643	1	3876537	3877037	AT1G11580	+	203	Yes	NA	12411	7	0.070444	700	-9.47042	1	6	0.070444	600	-7.48003	1785	202	-0.585646	100	2	-3.75507	2.6e-34	-5.10966	2.31e-58
1	21936929	21937429	AT1G59700	+	1140	1	21928526	21929026	AT1G59700	+	232	Yes	Yes	8403	6	0.070444	600	-7.47327	1	2	0.070444	200	-1.3309	1052	201	-2.96131	400	2	3.23576	1.28e-32	-0.790388	1.35e-06
2	13411962	13412462	AT2G31490	+	278	2	13408873	13409373	AT2G31490	+	691	NA	Yes	3089	18	0.070444	1800	-37.8441	0	5	0.070444	500	-5.63766	232	716	-11.1309	1300	-14	NA	NA	NA	NA
2	15051111	15051611	AT2G35820	+	878	2	15048562	15049062	AT2G35820	+	181	Yes	NA	2549	7	0.070444	700	-9.47988	1	2	0.070444	200	-1.3309	901	194	-4.13478	500	2	6.08614	7.55e-134	1.99626	4.54e-127
1	1541050	1541550	AT1G05291	+	54	1	1529968	1530468	AT1G05291	+	2006	NA	Yes	11082	9	0.070444	900	-14.2598	0.176492	3	0.070444	300	-2.5409	62	1797	-4.61969	600	4	NA	NA	-5.25855	9.37e-57
1	6611168	6611668	AT1G19140	+	505	1	6608389	6608889	AT1G19140	+	100	Yes	NA	2779	8	0.070444	800	-11.7089	1	5	0.070444	500	-5.67725	438	96	-1.45321	300	4	NA	NA	NA	NA
2	12939024	12939524	AT2G30362	+	94	2	12934402	12934902	AT2G30362	+	772	NA	Yes	4622	6	0.070444	600	-7.54105	1	3	0.070444	300	-2.53314	104	690	-1.70239	300	2	NA	NA	1.01455	5.64e-06
2	6560505	6561005	AT2G15110	+	40	2	6533894	6534394	AT2G15110	+	1446	NA	Yes	26611	6	0.070444	600	-7.70335	1	3	0.070444	300	-2.55171	40	1241	-1.72612	300	2	NA	NA	5.5221	1.07e-113
1	24361486	24361986	AT1G65520	+	460	1	24359471	24359971	AT1G65520	+	1225	Yes	Yes	2015	55	0.070444	5500	-172.557	0	33	0.070444	3300	-87.1294	461	1026	-8.15563	2200	-66	-1.58707	0.000105774	-2.181	5.82e-07
1	24205052	24205552	AT1G65150	+	907	1	24186448	24186948	AT1G65150	+	105	Yes	NA	18604	7	0.070444	700	-9.54393	1	1	0.070444	100	-0.455281	816	86	-7.55185	600	-2	0.819333	0.00387346	NA	NA
1	18440579	18441079	AT1G49810	+	25	1	18436558	18437058	AT1G49810	+	944	NA	Yes	4021	6	0.070444	600	-7.88698	1	4	0.070444	400	-4.07083	32	827	-0.991896	200	2	NA	NA	NA	NA
1	248941	249441	AT1G01690	+	837	1	242822	243322	AT1G01690	+	407	Yes	NA	6119	9	0.070444	900	-13.7679	0.256828	4	0.070444	400	-3.97096	651	462	-2.9886	500	4	NA	NA	-1.28514	0.000109549
1	11141429	11141929	AT1G31175	+	31	1	11137104	11137604	AT1G31175	+	1099	NA	Yes	4325	8	0.070444	800	-12.2572	1	1	0.070444	100	-0.450752	37	975	-9.84298	700	-4	NA	NA	NA	NA
2	14694032	14694532	AT2G34830	+	164	2	14689603	14690103	AT2G34830	+	978	Yes	Yes	4429	18	0.070444	1800	-38.2083	0	8	0.070444	800	-11.681	114	822	-5.96977	1000	14	-3.56379	1.06e-73	NA	NA
2	17935030	17935530	AT2G43140	+	657	2	17930032	17930532	AT2G43140	+	73	Yes	NA	4998	11	0.070444	1100	-19.076	0.001839	7	0.070444	700	-9.65752	635	61	-1.85283	400	6	-1.37585	0.0245385	NA	NA
1	1452361	1452861	AT1G05060	+	69	1	1426387	1426887	AT1G05060	+	1292	NA	Yes	25974	6	0.070444	600	-7.58342	1	3	0.070444	300	-2.5426	57	1034	-1.71429	300	2	NA	NA	-1.93148	4.58e-07
2	17997882	17998382	AT2G43320	+	65	2	17990055	17990555	AT2G43320	+	1270	NA	Yes	7827	8	0.070444	800	-11.8338	1	4	0.070444	400	-4.01422	66	1127	-2.26246	400	4	-0.778584	5.23e-07	0.639213	0.000116034
2	14695569	14696069	AT2G34830	+	185	2	14691102	14691602	AT2G34830	+	1059	Yes	Yes	4467	14	0.070444	1400	-26.5587	1e-06	3	0.070444	300	-2.52978	148	796	-11.3591	1100	-10	-3.56379	1.06e-73	NA	NA
1	20154963	20155463	AT1G54000	+	623	1	20149025	20149525	AT1G54000	+	615	Yes	Yes	5938	9	0.070444	900	-13.744	0.261451	1	0.070444	100	-0.458085	575	493	-11.5319	800	-4	-5.58652	2.26e-43	NA	NA
3	239594	240094	AT3G01640	+	896	3	238041	238541	AT3G01640	+	158	Yes	NA	1553	18	0.070444	1800	-38.2426	0	5	0.070444	500	-5.65038	786	159	-11.2789	1300	-14	NA	NA	NA	NA
1	1594511	1595011	AT1G05430	+	114	1	1587039	1587539	AT1G05430	+	1714	NA	Yes	7472	20	0.070444	2000	-44.8942	0	5	0.070444	500	-5.71353	63	1630	-15.2198	1500	-16	0.796985	7.37e-18	0.347916	0.0248849
1	24053565	24054065	AT1G64750	+	70	1	24044623	24045123	AT1G64750	+	980	NA	Yes	8942	8	0.070444	800	-11.808	1	1	0.070444	100	-0.454502	70	723	-9.62217	700	-4	-0.558419	0.00102939	5.06858	7.68e-66
2	9812991	9813491	AT2G23060	+	166	2	9806388	9806888	AT2G23060	+	590	Yes	Yes	6603	8	0.070444	800	-11.6195	1	3	0.070444	300	-2.52838	180	508	-3.43441	500	4	-0.843129	0.0374879	-3.51675	2.02e-20
1	2254639	2255139	AT1G07340	+	1235	1	2250932	2251432	AT1G07340	+	117	Yes	NA	3707	15	0.070444	1500	-29.6555	0	6	0.070444	600	-7.52001	954	115	-5.90075	900	10	NA	NA	NA	NA
1	10200553	10201053	AT1G29180	+	1456	1	10179110	10179610	AT1G29180	+	71	Yes	NA	21443	6	0.070444	600	-7.57889	1	1	0.070444	100	-0.453358	1499	55	-5.72915	500	2	-4.65168	4.17e-19	NA	NA
1	24862112	24862612	AT1G66660	+	757	1	24855495	24855995	AT1G66660	+	92	Yes	NA	6617	11	0.070444	1100	-18.933	0.002083	7	0.070444	700	-9.58277	695	84	-1.82946	400	6	0.325034	0.0403831	NA	NA
1	24044598	24045098	AT1G64710	+	980	1	24036968	24037468	AT1G64710	+	120	Yes	NA	7630	6	0.070444	600	-7.51611	1	3	0.070444	300	-2.53359	723	100	-1.70295	300	2	5.06858	7.68e-66	5.64386	1.17e-47
2	1005942	1006442	AT2G03310	+	477	2	1000435	1000935	AT2G03310	+	98	Yes	NA	5507	7	0.070444	700	-9.55497	1	3	0.070444	300	-2.53674	592	79	-2.52574	400	2	5.44656	8.91e-81	NA	NA
2	17294343	17294843	AT2G41473	+	1240	2	17287944	17288444	AT2G41473	+	80	Yes	NA	6399	6	0.070444	600	-7.56141	1	1	0.070444	100	-0.453883	1102	61	-5.71704	500	2	NA	NA	0.572124	0.000527637
1	20862513	20863013	AT1G55810	+	60	1	20855328	20855828	AT1G55810	+	1220	NA	Yes	7185	7	0.070444	700	-9.66213	1	3	0.070444	300	-2.54829	45	1193	-2.56507	400	2	NA	NA	NA	NA
2	9460501	9461001	AT2G22250	+	68	2	9435918	9436418	AT2G22250	+	1973	NA	Yes	24583	8	0.070444	800	-11.8178	1	2	0.070444	200	-1.33092	62	1572	-5.57734	600	4	-0.657335	4.41e-15	NA	NA
1	26662446	26662946	AT1G70710	+	1745	1	26644548	26645048	AT1G70710	+	76	Yes	NA	17898	9	0.070444	900	-14.089	0.204066	7	0.070444	700	-9.68233	1359	56	-0.913633	200	4	-0.700258	0.0328316	-1.56345	1.91e-06
2	17082599	17083099	AT2G40935	+	58	2	17070970	17071470	AT2G40935	+	1371	NA	Yes	11629	6	0.070444	600	-7.61415	1	2	0.070444	200	-1.33094	52	1356	-3.01357	400	2	NA	NA	NA	NA
2	15109188	15109688	AT2G35970	+	401	2	15104427	15104927	AT2G35970	+	136	Yes	NA	4761	6	0.070444	600	-7.50559	1	1	0.070444	100	-0.456432	308	130	-5.65946	500	2	NA	NA	2.27826	2.68e-05
1	4556573	4557073	AT1G13300	+	366	1	4550526	4551026	AT1G13300	+	999	Yes	Yes	6047	16	0.070444	1600	-31.9042	0	3	0.070444	300	-2.52535	340	748	-14.4172	1300	-12	NA	NA	NA	NA
2	7574959	7575459	AT2G17442	+	80	2	7568070	7568570	AT2G17442	+	1324	NA	Yes	6889	10	0.070444	1000	-16.4878	0.021285	5	0.070444	500	-5.72277	58	1461	-2.82464	500	6	1.93596	2.08e-07	-2.62464	6.29e-39
2	6829121	6829621	AT2G15670	+	254	2	6826621	6827121	AT2G15670	+	28	Yes	NA	2500	8	0.070444	800	-12.3507	1	4	0.070444	400	-4.15166	242	19	-2.46237	400	4	NA	NA	NA	NA
1	10903475	10903975	AT1G30740	+	55	1	10895547	10896047	AT1G30740	+	985	NA	Yes	7928	7	0.070444	700	-9.68786	1	3	0.070444	300	-2.54464	52	948	-2.55245	400	2	NA	NA	NA	NA
1	24423551	24424051	AT1G65670	+	1262	1	24418494	24418994	AT1G65670	+	138	Yes	NA	5057	13	0.070444	1300	-23.9773	1.7e-05	6	0.070444	600	-7.51686	1169	119	-4.05824	700	8	NA	NA	0.661344	2.53e-08
2	8249920	8250420	AT2G19040	+	704	2	8241479	8241979	AT2G19040	+	1163	Yes	Yes	8441	24	0.070444	2400	-56.1084	0	16	0.070444	1600	-31.7553	739	1246	-2.87853	800	22	NA	NA	NA	NA
1	4269016	4269516	AT1G12530	+	139	1	4260532	4261032	AT1G12530	+	1119	NA	Yes	8484	9	0.070444	900	-13.907	0.231691	2	0.070444	200	-1.3309	106	966	-6.96869	700	-4	NA	NA	NA	NA
1	977019	977519	AT1G03850	+	1901	1	951519	952019	AT1G03850	+	83	Yes	NA	25500	6	0.070444	600	-7.55645	1	0	0.070444	0	1.00701	1805	72	1.00701	600	2	-2.24126	9.76e-08	0.72935	0.0283884
2	17251501	17252001	AT2G41380	+	1047	2	17234013	17234513	AT2G41380	+	366	Yes	Yes	17488	14	0.070444	1400	-26.3399	2e-06	5	0.070444	500	-5.62804	987	357	-6.29035	900	10	-2.69218	7.82e-33	NA	NA
1	7440991	7441491	AT1G21250	+	66	1	7434937	7435437	AT1G21250	+	573	NA	Yes	6054	6	0.070444	600	-7.59074	1	4	0.070444	400	-4.00576	79	592	-0.991232	200	2	4.1292	0.00267597	NA	NA
1	12451978	12452478	AT1G34190	+	826	1	12442546	12443046	AT1G34190	+	56	Yes	NA	9432	6	0.070444	600	-7.6211	1	2	0.070444	200	-1.33097	755	39	-3.0385	400	2	-0.491972	8.98e-05	NA	NA
1	19310415	19310915	AT1G51960	+	100	1	19295473	19295973	AT1G51960	+	904	NA	Yes	14942	9	0.070444	900	-13.9916	0.218939	3	0.070444	300	-2.54188	59	665	-4.63006	600	4	NA	NA	2.27293	4.16e-55
1	27654592	27655092	AT1G73580	+	1721	1	27652964	27653464	AT1G73580	+	281	Yes	Yes	1628	47	0.070444	4700	-141.698	0	31	0.070444	3100	-80.8904	1454	249	-5.51466	1600	54	-5.52389	8.54e-26	1.46631	4.72e-09
1	24938422	24938922	AT1G66852	+	1945	1	24909996	24910496	AT1G66852	+	600	Yes	Yes	28426	6	0.070444	600	-7.44559	1	0	0	0	0	0	0	0	600	2	NA	NA	NA	NA
2	8084432	8084932	AT2G18640	+	830	2	8074419	8074919	AT2G18640	+	1212	Yes	Yes	10013	10	0.070444	1000	-16.054	0.02993	4	0.070444	400	-3.96846	716	1186	-3.86176	600	6	NA	NA	-0.731607	0.0227157
1	6525068	6525568	AT1G18890	+	1638	1	6521457	6521957	AT1G18890	+	420	Yes	Yes	3611	38	0.070444	3800	-105.581	0	28	0.070444	2800	-69.5603	1335	508	-2.92426	1000	40	NA	NA	-3.55056	4.76e-37
2	8074378	8074878	AT2G18600	+	1212	2	8063074	8063574	AT2G18600	+	116	Yes	NA	11304	7	0.070444	700	-9.52933	1	5	0.070444	500	-5.6655	1186	116	-0.957084	200	2	-0.731607	0.0227157	-1.10954	0.00101368
1	24606011	24606511	AT1G66100	+	1633	1	24594516	24595016	AT1G66100	+	573	Yes	NA	11495	8	0.070444	800	-11.5258	1	4	0.070444	400	-3.96902	1650	638	-2.20711	400	4	9.16812	5.04e-64	2.21411	0.00120448
1	21936901	21937401	AT1G59700	+	1140	1	21929985	21930485	AT1G59700	+	658	Yes	Yes	6916	20	0.070444	2000	-43.5504	0	11	0.070444	1100	-18.4855	1052	657	-4.08396	900	16	3.23576	1.28e-32	NA	NA
2	18316463	18316963	AT2G44350	+	96	2	18307904	18308404	AT2G44350	+	1490	NA	Yes	8559	9	0.070444	900	-14.0044	0.216962	5	0.070444	500	-5.68435	87	1221	-2.06264	400	4	-0.979417	1.17e-27	-1.67675	9.05e-09
1	18895969	18896469	AT1G50970	+	146	1	18890390	18890890	AT1G50970	+	949	NA	Yes	5579	15	0.070444	1500	-29.486	0	2	0.070444	200	-1.3309	115	936	-17.9577	1300	-10	NA	NA	NA	NA
2	15051007	15051507	AT2G35820	+	878	2	15049029	15049529	AT2G35820	+	1645	Yes	Yes	1978	56	0.074694	5281.32	-175.065	0	45	0.073859	4291.91	-131.171	901	1565	-2.57331	989.408	68	6.08614	7.55e-134	-2.48051	1.93e-21
2	12961503	12962003	AT2G30420	+	1146	2	12956945	12957445	AT2G30420	+	113	Yes	NA	4558	15	0.070444	1500	-29.6861	0	12	0.070444	1200	-21.3875	911	120	-1.16265	300	10	8.55442	4.63e-15	-2.78454	3.51e-59
2	349987	350487	AT2G01810	+	207	2	344085	344585	AT2G01810	+	1257	Yes	Yes	5902	10	0.070444	1000	-16.189	0.026832	3	0.070444	300	-2.52728	217	1258	-5.64722	700	6	NA	NA	NA	NA
1	24205497	24205997	AT1G65150	+	1080	1	24195953	24196453	AT1G65150	+	863	Yes	Yes	9544	18	0.070444	1800	-37.5008	0	7	0.070444	700	-9.41257	937	819	-7.00932	1100	-14	0.819333	0.00387346	-1.17329	0.00141585
1	248949	249449	AT1G01690	+	837	1	247135	247635	AT1G01690	+	243	Yes	Yes	1814	19	0.070444	1900	-40.9386	0	5	0.070444	500	-5.63599	651	247	-12.4625	1400	-16	NA	NA	NA	NA
2	6287567	6288067	AT2G14692	+	847	2	6281480	6281980	AT2G14692	+	48	Yes	NA	6087	8	0.070444	800	-11.965	1	3	0.070444	300	-2.54829	991	45	-3.56103	500	4	NA	NA	NA	NA
3	302995	303495	AT3G01860	+	137	3	294600	295100	AT3G01860	+	1018	NA	Yes	8395	7	0.070444	700	-9.50812	1	0	0.070444	0	1.00647	78	999	1.00647	700	2	-0.479481	6.5e-06	-0.560473	3.09e-07
1	8249121	8249621	AT1G23230	+	53	1	8234138	8234638	AT1G23230	+	1906	NA	Yes	14983	6	0.070444	600	-7.63255	1	1	0.070444	100	-0.448887	30	1750	-5.83581	500	2	NA	NA	NA	NA
2	10880590	10881090	AT2G25560	+	108	2	10871576	10872076	AT2G25560	+	1273	NA	Yes	9014	16	0.070444	1600	-32.6444	0	9	0.070444	900	-14.0334	88	1161	-3.40881	700	12	NA	NA	NA	NA
1	20155116	20155616	AT1G54000	+	623	1	20151523	20152023	AT1G54000	+	90	Yes	NA	3593	6	0.070444	600	-7.5462	1	1	0.070444	100	-0.455358	575	88	-5.68349	500	2	-5.58652	2.26e-43	-5.66366	5.41e-47
1	8877580	8878080	AT1G25320	+	1383	1	8860568	8861068	AT1G25320	+	1512	Yes	Yes	17012	9	0.108144	586.25	-13.7181	0.266474	4	0.077619	363.021	-3.96691	1088	1362	-1.53907	223.23	4	NA	NA	2.08691	2.92e-56
2	6299360	6299860	AT2G14710	+	83	2	6287609	6288109	AT2G14710	+	847	NA	Yes	11751	6	0.070444	600	-7.55645	1	1	0.070444	100	-0.454674	73	991	-5.69897	500	2	NA	NA	NA	NA
2	1020602	1021102	AT2G03350	+	92	2	1008854	1009354	AT2G03350	+	1470	NA	Yes	11748	9	0.070444	900	-14.0182	0.214881	4	0.070444	400	-4.00321	84	1276	-3.06163	500	4	1.3252	2.78e-47	NA	NA
2	9814468	9814968	AT2G23060	+	552	2	9809069	9809569	AT2G23060	+	173	Yes	Yes	5399	7	0.070444	700	-9.48393	1	0	0.070444	0	1.00301	627	167	1.00301	700	2	-0.843129	0.0374879	NA	NA
1	27478642	27479142	AT1G73060	+	598	1	27474494	27474994	AT1G73060	+	78	Yes	NA	4148	8	0.070444	800	-11.7738	1	3	0.070444	300	-2.5426	405	57	-3.52365	500	4	3.12922	7.59e-64	NA	NA
1	19232036	19232536	AT1G51810	+	634	1	19223092	19223592	AT1G51810	+	119	Yes	NA	8944	7	0.070444	700	-9.52583	1	2	0.070444	200	-1.3309	848	124	-4.15459	500	2	NA	NA	7.1917	1.38e-223
1	20701014	20701514	AT1G55440	+	84	1	20682043	20682543	AT1G55440	+	1979	NA	Yes	18971	7	0.070444	700	-9.58277	1	2	0.070444	200	-1.33091	102	1861	-4.16661	500	2	NA	NA	-2.989	1.96e-13
1	24045375	24045875	AT1G64710	+	707	1	24038330	24038830	AT1G64710	+	143	Yes	NA	7045	8	0.070444	800	-11.6411	1	1	0.070444	100	-0.456304	590	123	-9.52144	700	-4	5.06858	7.68e-66	0.465207	0.0146369
1	531939	532439	AT1G02530	+	79	1	520600	521100	AT1G02530	+	1047	NA	Yes	11339	6	0.070444	600	-7.56315	1	3	0.070444	300	-2.53821	72	1013	-1.70872	300	2	-2.20357	0.0024864	NA	NA
2	17294369	17294869	AT2G41473	+	1240	2	17290491	17290991	AT2G41473	+	113	Yes	Yes	3878	15	0.070444	1500	-29.6861	0	3	0.070444	300	-2.53491	1102	90	-13.2641	1200	-10	NA	NA	NA	NA
1	7854483	7854983	AT1G22240	+	62	1	7846545	7847045	AT1G22240	+	1871	NA	Yes	7938	16	0.070444	1600	-33.4952	0	7	0.070444	700	-9.64875	63	1565	-5.72939	900	12	NA	NA	-3.55252	1.02e-48
2	13436964	13437464	AT2G31560	+	2021	2	13429977	13430477	AT2G31560	+	163	Yes	NA	6987	21	0.070444	2100	-47.5594	0	5	0.070444	500	-5.65282	1796	150	-15.643	1600	-18	2.82824	3.81e-16	1.10123	1.55e-10
1	3846977	3847477	AT1G11430	+	132	1	3840970	3841470	AT1G11430	+	1890	NA	Yes	6007	24	0.070444	2400	-57.7999	0	14	0.070444	1400	-26.8783	109	1525	-4.52902	1000	22	2.87989	1.95e-113	2.69295	5.91e-51
1	25834461	25834961	AT1G68790	+	212	1	25827538	25828038	AT1G68790	+	1915	Yes	Yes	6923	22	0.070444	2200	-50.4581	0	9	0.070444	900	-13.8398	203	1876	-8.09529	1300	-18	0.268	0.0151746	NA	NA
2	856430	856930	AT2G02950	+	1450	2	851907	852407	AT2G02950	+	56	Yes	NA	4523	9	0.070444	900	-14.2384	0.179936	4	0.070444	400	-4.05833	1105	36	-3.19807	500	4	3.90232	7.51e-52	-3.49288	2.2e-13
2	9627533	9628033	AT2G22660	+	56	2	9623563	9624063	AT2G22660	+	1083	NA	Yes	3970	10	0.070444	1000	-16.7082	0.0175	4	0.070444	400	-4.01941	60	976	-4.04976	600	6	-1.29758	1.16e-15	NA	NA
1	27508539	27509039	AT1G73165	+	1486	1	27501512	27502012	AT1G73165	+	250	Yes	Yes	7027	7	0.070444	700	-9.45584	1	3	0.070444	300	-2.52661	1377	248	-2.49267	400	2	NA	NA	-1.18079	8.34e-09
2	10437012	10437512	AT2G24570	+	87	2	10431631	10432131	AT2G24570	+	880	Yes	Yes	5381	11	0.070444	1100	-18.9643	0.002029	2	0.070444	200	-1.33091	77	850	-10.3724	900	-6	-2.29824	3.37e-32	NA	NA
1	20352000	20352500	AT1G54490	+	83	1	20339037	20339537	AT1G54490	+	1159	NA	Yes	12963	6	0.070444	600	-7.55645	1	5	0.070444	500	-5.69774	74	1003	-0.56975	100	2	NA	NA	-1.11861	5.19e-05
1	24513513	24514013	AT1G65890	+	1235	1	24494503	24495003	AT1G65890	+	1049	Yes	Yes	19010	10	0.070444	1000	-16.0447	0.03015	2	0.070444	200	-1.33089	1196	862	-8.37087	800	-6	NA	NA	-3.47514	2.96e-08
2	8249523	8250023	AT2G19040	+	1009	2	8245001	8245501	AT2G19040	+	272	Yes	Yes	4522	17	0.070444	1700	-34.9012	0	10	0.070444	1000	-16.1583	966	249	-3.0961	700	12	NA	NA	NA	NA
2	17252120	17252620	AT2G41380	+	1137	2	17239024	17239524	AT2G41380	+	179	Yes	Yes	13096	6	0.070444	600	-7.48677	1	1	0.070444	100	-0.457173	980	194	-5.64307	500	2	-2.69218	7.82e-33	NA	NA
1	5807126	5807626	AT1G16980	+	1318	1	5799971	5800471	AT1G16980	+	63	Yes	NA	7155	11	0.070444	1100	-19.1884	0.001659	2	0.070444	200	-1.33092	1338	62	-10.4758	900	-6	NA	NA	5.49737	8.88e-56
2	15193004	15193504	AT2G36220	+	103	2	15186067	15186567	AT2G36220	+	602	NA	Yes	6937	6	0.070444	600	-7.53096	1	5	0.070444	500	-5.68523	86	775	-0.571323	100	2	NA	NA	-2.66454	3.59e-05
1	18249544	18250044	AT1G49330	+	69	1	18234948	18235448	AT1G49330	+	1211	NA	Yes	14596	7	0.070444	700	-9.62562	1	1	0.070444	100	-0.455025	80	1069	-7.56141	600	-2	NA	NA	-0.519545	0.00560524
1	8867439	8867939	AT1G25290	+	111	1	8860609	8861109	AT1G25290	+	1512	NA	Yes	6830	15	0.070444	1500	-29.7022	0	3	0.070444	300	-2.53359	100	1362	-13.1921	1200	-10	1.97839	5.51e-41	2.08691	2.92e-56
1	3010012	3010512	AT1G09320	+	54	1	3003969	3004469	AT1G09320	+	1289	NA	Yes	6043	9	0.070444	900	-14.2598	0.176492	5	0.070444	500	-5.75687	45	1158	-2.11367	400	4	NA	NA	-0.577907	0.000103518
1	24815521	24816021	AT1G66510	+	77	1	24811976	24812476	AT1G66510	+	1108	NA	Yes	3545	7	0.070444	700	-9.60061	1	1	0.070444	100	-0.453634	58	1132	-7.61415	600	-2	NA	NA	NA	NA
1	24620533	24621033	AT1G66140	+	113	1	24606079	24606579	AT1G66140	+	1633	NA	Yes	14454	8	0.070444	800	-11.6828	1	5	0.070444	500	-5.67081	106	1650	-1.45153	300	4	-1.2462	4.97e-05	9.16812	5.04e-64
2	17591997	17592497	AT2G42220	+	110	2	17588055	17588555	AT2G42220	+	1554	NA	Yes	3942	13	0.070444	1300	-24.1103	1.5e-05	10	0.070444	1000	-16.5686	69	1124	-1.22509	300	8	7.53054	4.01e-181	4.74874	3.4e-40
1	580495	580995	AT1G02680	+	122	1	574008	574508	AT1G02680	+	599	NA	Yes	6487	7	0.070444	700	-9.52251	1	4	0.070444	400	-4.00183	87	667	-1.55533	300	2	0.431506	0.00522225	4.22113	1.32e-67
2	14502031	14502531	AT2G34357	+	43	2	14494469	14494969	AT2G34357	+	1262	NA	Yes	7562	6	0.070444	600	-7.68298	1	1	0.070444	100	-0.453634	58	1183	-5.72277	500	2	NA	NA	-5.066	5.55e-07
1	24605992	24606492	AT1G66100	+	1633	1	24595940	24596440	AT1G66100	+	112	Yes	NA	10052	7	0.070444	700	-9.5343	1	1	0.070444	100	-0.455757	1650	100	-7.53411	600	-2	9.16812	5.04e-64	NA	NA
1	3889012	3889512	AT1G11580	+	1643	1	3882509	3883009	AT1G11580	+	939	Yes	Yes	6503	22	0.079787	1942.38	-49.6528	0	18	0.092189	1375.42	-37.4808	1785	986	-2.6364	566.963	18	-3.75507	2.6e-34	NA	NA
1	29868594	29869094	AT1G79410	+	725	1	29864000	29864500	AT1G79410	+	47	Yes	NA	4594	6	0.070444	600	-7.66008	1	3	0.070444	300	-2.5636	596	29	-1.74215	300	2	-0.606447	0.015895	-0.42019	0.00260493
1	10062964	10063464	AT1G28630	+	1994	1	10053567	10054067	AT1G28630	+	225	Yes	Yes	9397	15	0.070444	1500	-29.2516	0	3	0.070444	300	-2.52919	1669	160	-12.9572	1200	-10	NA	NA	4.4693	1.6e-30
1	27914512	27915012	AT1G74230	+	1187	1	27886371	27886871	AT1G74230	+	83	Yes	NA	28141	6	0.070444	600	-7.55645	1	2	0.070444	200	-1.33092	1106	61	-3.00284	400	2	NA	NA	NA	NA
1	155423	155923	AT1G01420	+	197	1	130313	130813	AT1G01420	+	782	NA	Yes	25110	6	0.070444	600	-7.48136	1	1	0.070444	100	-0.45699	173	488	-5.6471	500	2	0.78716	0.000198684	3.80848	1.9e-76
2	13819551	13820051	AT2G32550	+	1775	2	13799399	13799899	AT2G32550	+	130	Yes	NA	20152	6	0.070444	600	-7.50923	1	3	0.070444	300	-2.53224	1412	113	-1.70128	300	2	1.07431	0.0199095	-2.53209	4.89e-07
1	20283130	20283630	AT1G54340	+	1884	1	20273549	20274049	AT1G54340	+	67	Yes	NA	9581	13	0.070444	1300	-24.5485	1e-05	6	0.070444	600	-7.58342	1562	69	-4.18087	700	8	-0.445162	6.12e-06	1.45846	1.16e-20
2	7425546	7426046	AT2G17060	+	77	2	7415460	7415960	AT2G17060	+	1007	Yes	Yes	10086	7	0.070444	700	-9.60061	1	1	0.070444	100	-0.454036	63	1048	-7.59879	600	-2	-3.88985	1.14e-14	-3.20113	7.7e-19
2	12961477	12961977	AT2G30420	+	1146	2	12959965	12960465	AT2G30420	+	78	Yes	NA	1512	18	0.070444	1800	-39.2552	0	8	0.070444	800	-11.8577	911	61	-6.36432	1000	14	8.55442	4.63e-15	NA	NA
1	28712046	28712546	AT1G76510	+	976	1	28695960	28696460	AT1G76510	+	83	Yes	NA	16086	7	0.070444	700	-9.58513	1	3	0.070444	300	-2.53585	781	84	-2.52277	400	2	0.259523	0.0279398	NA	NA
1	11560539	11561039	AT1G32130	+	91	1	11546957	11547457	AT1G32130	+	858	NA	Yes	13582	6	0.070444	600	-7.54487	1	2	0.070444	200	-1.33091	77	772	-2.99017	400	2	NA	NA	-1.47247	9.61e-23
2	19274410	19274910	AT2G46915	+	69	2	19265495	19265995	AT2G46915	+	1869	NA	Yes	8915	7	0.070444	700	-9.62562	1	6	0.070444	600	-7.58823	67	1796	-0.576438	100	2	1.37751	4.69e-09	7.77287	2.63e-07
2	6697939	6698439	AT2G15370	+	63	2	6664906	6665406	AT2G15370	+	1660	NA	Yes	33033	6	0.070444	600	-7.59879	1	3	0.070444	300	-2.54337	55	1473	-1.71528	300	2	-5.97974	9.96e-12	NA	NA
1	26157647	26158147	AT1G69560	+	94	1	26153039	26153539	AT1G69560	+	1343	NA	Yes	4608	8	0.070444	800	-11.7235	1	1	0.070444	100	-0.455897	105	1168	-9.54393	700	-4	NA	NA	2.52133	7.8e-30
1	24205428	24205928	AT1G65150	+	1080	1	24196911	24197411	AT1G65150	+	1063	Yes	NA	8517	18	0.070444	1800	-37.4707	0	8	0.070444	800	-11.5196	937	685	-5.65214	1000	14	0.819333	0.00387346	NA	NA
1	8244523	8245023	AT1G23230	+	77	1	8240428	8240928	AT1G23230	+	1273	NA	Yes	4095	14	0.070444	1400	-27.2158	1e-06	9	0.070444	900	-14.2283	57	1133	-2.25187	500	10	NA	NA	-4.2004	4.51e-15
2	8329461	8329961	AT2G19190	+	1544	2	8309991	8310491	AT2G19190	+	98	Yes	NA	19470	9	0.070444	900	-13.9979	0.217969	1	0.070444	100	-0.455158	1509	83	-11.7559	800	-4	1.20009	0.00736079	-0.761235	0.000130892
2	10044502	10045002	AT2G23610	+	221	2	10035523	10036023	AT2G23610	+	1478	Yes	Yes	8979	9	0.070444	900	-13.828	0.245002	4	0.070444	400	-3.98083	193	1278	-3.01045	500	4	-0.379006	0.000865226	NA	NA
1	8878521	8879021	AT1G25320	+	1470	1	8866457	8866957	AT1G25320	+	142	Yes	Yes	12064	9	0.070444	900	-13.9024	0.232365	1	0.070444	100	-0.456531	1385	136	-11.6491	800	-4	NA	NA	-0.481043	0.000346964
1	3502527	3503027	AT1G10590	+	63	1	3499424	3499924	AT1G10590	+	632	NA	Yes	3103	11	0.070444	1100	-19.1884	0.001659	2	0.070444	200	-1.33095	48	407	-10.6369	900	-6	NA	NA	NA	NA
1	23255540	23256040	AT1G62800	+	126	1	23246426	23246926	AT1G62800	+	1209	Yes	Yes	9114	8	0.070444	800	-11.6622	1	5	0.070444	500	-5.65493	143	1425	-1.44742	300	4	-2.15312	2.61e-102	-3.97259	1.03e-51
1	28453027	28453527	AT1G75780	+	99	1	28435024	28435524	AT1G75780	+	1129	NA	Yes	18003	13	0.070444	1300	-24.1842	1.4e-05	3	0.070444	300	-2.53568	85	955	-10.0162	1000	-8	-1.99306	8.85e-14	-1.51368	0.000707355
1	483465	483965	AT1G02391	+	129	1	477459	477959	AT1G02391	+	417	Yes	Yes	6006	7	0.070444	700	-9.51537	1	0	0.070444	0	1.00607	83	299	1.00607	700	2	NA	NA	NA	NA
2	13798992	13799492	AT2G32510	+	151	2	13792338	13792838	AT2G32510	+	836	NA	Yes	6654	9	0.070444	900	-13.8899	0.234438	3	0.070444	300	-2.53001	144	773	-4.5088	600	4	-2.53209	4.89e-07	3.50107	6.5e-12
1	22229521	22230021	AT1G60300	+	64	1	22223558	22224058	AT1G60300	+	1643	NA	Yes	5963	14	0.070444	1400	-27.4585	1e-06	5	0.070444	500	-5.71353	63	1678	-6.73991	900	10	NA	NA	1.03543	0.00451182
1	19906424	19906924	AT1G53350	+	498	1	19896037	19896537	AT1G53350	+	890	NA	Yes	10387	9	0.070444	900	-13.7549	0.259408	3	0.070444	300	-2.52423	508	790	-4.45246	600	4	1.14402	2.87e-11	NA	NA
1	27478973	27479473	AT1G73060	+	1103	1	27475480	27475980	AT1G73060	+	81	Yes	NA	3493	11	0.070444	1100	-19.0071	0.001955	10	0.070444	1000	-16.5215	994	75	-0.595815	100	6	3.12922	7.59e-64	NA	NA
1	10200960	10201460	AT1G29180	+	265	1	10183647	10184147	AT1G29180	+	1843	Yes	Yes	17313	6	0.070444	600	-7.46762	1	3	0.070444	300	-2.52552	324	1602	-1.69308	300	2	-4.65168	4.17e-19	-2.26083	1.05e-20
1	12180633	12181133	AT1G33600	+	388	1	12177614	12178114	AT1G33600	+	415	Yes	Yes	3019	10	0.070444	1000	-16.1046	0.028756	3	0.070444	300	-2.52487	435	396	-5.6128	700	6	4.97643	5.67e-141	1.87121	2.18e-24
1	7039465	7039965	AT1G20330	+	205	1	7032853	7033353	AT1G20330	+	1176	NA	Yes	6612	14	0.070444	1400	-26.515	1e-06	5	0.070444	500	-5.6413	205	883	-6.35578	900	10	0.821169	1.89e-08	NA	NA
1	531984	532484	AT1G02530	+	79	1	523603	524103	AT1G02530	+	574	NA	Yes	8381	6	0.070444	600	-7.56315	1	2	0.070444	200	-1.33092	72	645	-2.9935	400	2	-2.20357	0.0024864	-4.92664	2.58e-65
2	13436997	13437497	AT2G31560	+	2021	2	13432031	13432531	AT2G31560	+	346	Yes	NA	4966	34	0.070444	3400	-91.1341	0	15	0.070444	1500	-29.1497	1796	296	-10.7007	1900	-34	2.82824	3.81e-16	-4.97912	3.94e-14
1	19293534	19294034	AT1G51915	+	619	1	19286966	19287466	AT1G51915	+	414	Yes	Yes	6568	8	0.070444	800	-11.5403	1	4	0.070444	400	-3.97105	523	456	-2.20951	400	4	NA	NA	NA	NA
1	25838036	25838536	AT1G68790	+	182	1	25829115	25829615	AT1G68790	+	1397	Yes	Yes	8921	9	0.070444	900	-13.8565	0.240002	1	0.070444	100	-0.457056	180	1048	-11.6091	800	-4	0.268	0.0151746	-0.912507	0.000203431
1	11004404	11004904	AT1G30920	+	1612	1	10992548	10993048	AT1G30920	+	70	Yes	NA	11856	6	0.070444	600	-7.58112	1	5	0.070444	500	-5.7057	1648	68	-0.568748	100	2	NA	NA	-5.89341	5.77e-23
1	26662499	26662999	AT1G70710	+	1745	1	26652034	26652534	AT1G70710	+	83	Yes	NA	10465	7	0.070444	700	-9.58513	1	2	0.070444	200	-1.33092	1359	72	-4.19536	500	2	-0.700258	0.0328316	-3.41797	1.6e-11
1	6186066	6186566	AT1G17970	+	55	1	6178072	6178572	AT1G17970	+	1537	NA	Yes	7994	11	0.070444	1100	-19.3104	0.001477	4	0.070444	400	-4.01502	65	1617	-5.086	700	6	1.1444	1.05e-12	-3.96404	8.35e-19
1	26420391	26420891	AT1G70160	+	1574	1	26413492	26413992	AT1G70160	+	311	Yes	Yes	6899	7	0.070444	700	-9.44356	1	1	0.070444	100	-0.457386	1445	226	-7.47448	600	-2	0.779568	0.000299809	-1.75385	9.79e-08
1	21447046	21447546	AT1G58007	+	1066	1	21439013	21439513	AT1G58007	+	60	Yes	NA	8033	12	0.070444	1200	-21.9076	0.000124	7	0.070444	700	-9.64875	1052	63	-2.4541	500	8	-3.06612	1.39e-08	2.30039	9.04e-16
1	10892884	10893384	AT1G30700	+	582	1	10887412	10887912	AT1G30700	+	83	Yes	NA	5472	6	0.070444	600	-7.55645	1	2	0.070444	200	-1.33092	568	70	-2.99497	400	2	-4.1307	6.8e-18	0.341853	0.00164071
2	12968436	12968936	AT2G30432	+	1133	2	12959552	12960052	AT2G30432	+	72	Yes	NA	8884	8	0.070444	800	-11.7987	1	3	0.070444	300	-2.53714	1282	77	-3.48867	500	4	NA	NA	NA	NA
1	4278613	4279113	AT1G12570	+	75	1	4272881	4273381	AT1G12570	+	930	NA	Yes	5732	7	0.070444	700	-9.60634	1	5	0.070444	500	-5.72277	58	753	-0.95732	200	2	4.33362	3.37e-18	NA	NA
2	13019491	13019991	AT2G30570	+	142	2	13018456	13018956	AT2G30570	+	662	NA	Yes	1035	31	0.070444	3100	-82.3899	0	10	0.070444	1000	-16.3593	108	464	-17.3223	2100	-32	7.14177	3.43e-162	NA	NA
1	22594875	22595375	AT1G61260	+	67	1	22589137	22589637	AT1G61260	+	333	NA	Yes	5738	6	0.070444	600	-7.58823	1	1	0.070444	100	-0.45372	59	215	-5.72079	500	2	NA	NA	NA	NA
1	5807114	5807614	AT1G16980	+	1318	1	5804469	5804969	AT1G16980	+	75	Yes	NA	2645	16	0.070444	1600	-33.1392	0	9	0.070444	900	-14.1446	1338	67	-3.49248	700	12	NA	NA	-0.747397	2.17e-11
2	2552	3052	AT2G01008	+	1955	3	14199879	14200379	AT2G01008	+	590	Yes	Yes	interchromosomal	15	0.070444	1500	-28.9914	0	6	0.070444	600	-7.44738	1866	544	-5.67509	900	10	NA	NA	NA	NA
1	8866984	8867484	AT1G25290	+	178	1	8864814	8865314	AT1G25290	+	525	NA	Yes	2170	18	0.070444	1800	-38.1374	0	6	0.070444	600	-7.49259	163	499	-9.02449	1200	-14	1.97839	5.51e-41	-0.481043	0.000346964
2	16257948	16258448	AT2G38940	+	117	2	16244412	16244912	AT2G38940	+	1297	Yes	Yes	13536	6	0.070444	600	-7.51841	1	1	0.070444	100	-0.455757	100	997	-5.67452	500	2	-2.17172	2.45e-47	NA	NA
1	12452021	12452521	AT1G34190	+	826	1	12448954	12449454	AT1G34190	+	799	Yes	Yes	3067	18	0.070444	1800	-37.5137	0	6	0.070444	600	-7.44203	755	807	-8.72831	1200	-14	-0.491972	8.98e-05	-3.15672	1.81e-11
1	11447069	11447569	AT1G31880	+	136	1	11430542	11431042	AT1G31880	+	1628	Yes	Yes	16527	6	0.070444	600	-7.50559	1	2	0.070444	200	-1.33091	99	1560	-2.97963	400	2	NA	NA	-1.00108	2.29e-15
1	28301608	28302108	AT1G75410	+	889	1	28299028	28299528	AT1G75410	+	86	Yes	NA	2580	22	0.070444	2200	-52.1294	0	11	0.070444	1100	-19.2603	722	58	-6.47323	1100	20	NA	NA	-0.962812	3.29e-14
2	12624507	12625007	AT2G29450	+	185	2	12619535	12620035	AT2G29450	+	1539	NA	Yes	4972	13	0.070444	1300	-23.8471	1.9e-05	6	0.070444	600	-7.50617	135	1288	-4.03932	700	8	3.51977	2.21e-22	NA	NA
2	8084040	8084540	AT2G18640	+	887	2	8078493	8078993	AT2G18640	+	223	Yes	NA	5547	14	0.070444	1400	-26.4826	1e-06	8	0.070444	800	-11.6254	811	159	-2.83245	600	10	NA	NA	-2.41745	1.59e-13
1	10132923	10133423	AT1G29030	+	456	1	10122477	10122977	AT1G29030	+	602	Yes	Yes	10446	10	0.070444	1000	-16.0904	0.029098	4	0.070444	400	-3.97073	477	618	-3.86971	600	6	-0.579994	1.61e-05	-4.00075	1.31e-40
1	25760515	25761015	AT1G68600	+	565	1	25753025	25753525	AT1G68600	+	592	Yes	Yes	7490	6	0.070444	600	-7.44666	1	1	0.070444	100	-0.458135	539	680	-5.62204	500	2	5.5984	9.73e-51	0.371677	0.000372875
2	8074494	8074994	AT2G18600	+	1212	2	8070033	8070533	AT2G18600	+	666	Yes	Yes	4461	35	0.070444	3500	-93.9669	0	15	0.070444	1500	-28.9743	1186	662	-11.2381	2000	-36	-0.731607	0.0227157	NA	NA
1	8653021	8653521	AT1G24400	+	137	1	8636085	8636585	AT1G24400	+	794	NA	Yes	16936	8	0.070444	800	-11.6479	1	5	0.070444	500	-5.65797	134	734	-1.4482	300	4	5.83633	1.09e-61	0.359846	0.0110819
1	10129934	10130434	AT1G29030	+	48	1	10126410	10126910	AT1G29030	+	1348	Yes	Yes	3524	13	0.070444	1300	-25.0225	6e-06	4	0.070444	400	-4.04629	41	1436	-7.84771	900	-8	-0.579994	1.61e-05	-5.44124	2.34e-51
1	12256354	12256854	AT1G33790	+	1209	1	12246111	12246611	AT1G33790	+	82	Yes	NA	10243	6	0.070444	600	-7.55806	1	2	0.070444	200	-1.33093	1075	55	-3.00958	400	2	NA	NA	0.84539	1.07e-06
1	29746949	29747449	AT1G79080	+	61	1	29733176	29733676	AT1G79080	+	1064	NA	Yes	13773	6	0.070444	600	-7.60462	1	1	0.070444	100	-0.451865	43	921	-5.76405	500	2	1.13125	2.3e-15	-0.844067	3.18e-14
3	1456505	1457005	AT3G05160	+	91	3	1437927	1438427	AT3G05160	+	1446	NA	Yes	18578	8	0.070444	800	-11.7315	1	2	0.070444	200	-1.33092	63	1193	-5.5743	600	4	1.02139	0.000308558	2.04228	3.39e-26
1	25759940	25760440	AT1G68600	+	1066	1	25756505	25757005	AT1G68600	+	113	Yes	NA	3435	8	0.070444	800	-11.6828	1	6	0.070444	600	-7.52083	905	114	-0.932273	200	4	5.5984	9.73e-51	2.43345	4.96e-26
1	21968532	21969032	AT1G59740	+	698	1	21950965	21951465	AT1G59740	+	1378	Yes	Yes	17567	9	0.070444	900	-13.7384	0.262446	3	0.070444	300	-2.52364	688	1294	-4.44677	600	4	-1.18227	7.49e-09	-4.30247	6.17e-12
1	3888678	3889178	AT1G11580	+	618	1	3884432	3884932	AT1G11580	+	306	Yes	NA	4246	12	0.070444	1200	-21.0914	0.000256	7	0.070444	700	-9.44324	569	313	-2.34226	500	8	-3.75507	2.6e-34	NA	NA
2	7933918	7934418	AT2G18230	+	180	2	7921973	7922473	AT2G18230	+	898	NA	Yes	11945	8	0.070444	800	-11.6091	1	2	0.070444	200	-1.3309	163	777	-5.46269	600	4	-1.13199	4.8e-06	-2.32078	1.38e-42
1	24577489	24577989	AT1G66020	+	1049	1	24560481	24560981	AT1G66020	+	165	Yes	NA	17008	6	0.070444	600	-7.49181	1	4	0.070444	400	-3.99015	948	125	-0.99116	200	2	-4.28271	6.31e-15	-1.24898	2.8e-26
1	24452969	24453469	AT1G65740	+	736	1	24436979	24437479	AT1G65740	+	180	Yes	NA	15990	6	0.070444	600	-7.48644	1	1	0.070444	100	-0.456981	785	172	-5.64731	500	2	NA	NA	0.699034	0.000939564
3	431476	431976	AT3G02260	+	66	3	416344	416844	AT3G02260	+	1673	NA	Yes	15132	7	0.070444	700	-9.63664	1	3	0.070444	300	-2.54378	54	1294	-2.54949	400	2	-0.495919	0.0385927	-2.05964	9.48e-66
2	16639526	16640026	AT2G39860	+	123	2	16637874	16638374	AT2G39860	+	448	NA	Yes	1652	12	0.070444	1200	-21.3754	0.000201	11	0.070444	1100	-18.9215	94	458	-0.602198	100	8	NA	NA	6.30833	6.91e-10
1	24578152	24578652	AT1G66020	+	1044	1	24563445	24563945	AT1G66020	+	122	Yes	Yes	14707	6	0.070444	600	-7.51464	1	1	0.070444	100	-0.455698	989	98	-5.67586	500	2	-4.28271	6.31e-15	-2.07679	3.41e-16
1	24434923	24435423	AT1G65700	+	167	1	24429648	24430148	AT1G65700	+	922	NA	Yes	5275	8	0.070444	800	-11.6187	1	1	0.070444	100	-0.456304	123	908	-9.52144	700	-4	NA	NA	NA	NA
1	9263947	9264447	AT1G26773	+	106	1	9224976	9225476	AT1G26773	+	2031	Yes	Yes	38971	8	0.070444	800	-11.696	1	1	0.070444	100	-0.454314	67	1619	-9.63285	700	-4	NA	NA	-0.753996	0.00315472
2	13819648	13820148	AT2G32550	+	1775	2	13806942	13807442	AT2G32550	+	126	Yes	NA	12706	6	0.070444	600	-7.51185	1	4	0.070444	400	-3.99463	1412	107	-0.991177	200	2	1.07431	0.0199095	-0.666596	2.19e-06
1	20283084	20283584	AT1G54340	+	1884	1	20276935	20277435	AT1G54340	+	95	Yes	NA	6149	15	0.070444	1500	-29.8576	0	7	0.070444	700	-9.56977	1562	90	-4.6438	800	10	-0.445162	6.12e-06	-1.01693	1.43e-06
1	8420606	8421106	AT1G23820	+	62	1	8413637	8414137	AT1G23820	+	700	NA	Yes	6969	6	0.070444	600	-7.60166	1	3	0.070444	300	-2.54378	54	552	-1.7158	300	2	-0.322554	0.00373587	-2.06379	2.97e-12
1	4288593	4289093	AT1G12600	+	48	1	4275144	4275644	AT1G12600	+	1309	NA	Yes	13449	7	0.070444	700	-9.73347	1	3	0.070444	300	-2.54298	56	1113	-2.54675	400	2	-1.20254	0.00208693	NA	NA
2	18874534	18875034	AT2G45860	+	218	2	18869038	18869538	AT2G45860	+	577	NA	Yes	5496	13	0.070444	1300	-23.79	2e-05	6	0.070444	600	-7.4871	178	495	-4.00606	700	8	0.275633	0.0219465	NA	NA
1	30370906	30371406	AT1G80820	+	1960	1	30347549	30348049	AT1G80820	+	103	Yes	NA	23357	7	0.070444	700	-9.54692	1	0	0	0	0	0	0	0	700	2	-3.46808	7.84e-27	NA	NA
1	1690864	1691364	AT1G05650	+	1161	1	1675440	1675940	AT1G05650	+	74	Yes	NA	15424	6	0.070444	600	-7.57257	1	2	0.070444	200	-1.33091	976	75	-2.99145	400	2	-5.49726	1.01e-09	NA	NA
1	24205470	24205970	AT1G65150	+	1080	1	24202471	24202971	AT1G65150	+	85	Yes	NA	2999	21	0.070444	2100	-48.7996	0	12	0.070444	1200	-21.7057	937	74	-4.37938	900	18	0.819333	0.00387346	NA	NA
1	6856535	6857035	AT1G19835	+	57	1	6852563	6853063	AT1G19835	+	1316	NA	Yes	3972	14	0.070444	1400	-27.6399	1e-06	10	0.070444	1000	-16.7992	50	1282	-1.6817	400	10	NA	NA	5.77932	1.56e-08
2	15524095	15524595	AT2G36960	+	72	2	15515398	15515898	AT2G36960	+	1058	NA	Yes	8697	9	0.070444	900	-14.1119	0.200389	4	0.070444	400	-4.01059	71	741	-3.079	500	4	NA	NA	NA	NA
2	8329515	8330015	AT2G19190	+	1544	2	8316497	8316997	AT2G19190	+	48	Yes	NA	13018	10	0.070444	1000	-16.835	0.015505	4	0.070444	400	-4.04424	1509	42	-4.1497	600	6	1.20009	0.00736079	0.589019	0.0207466
1	1452010	1452510	AT1G05060	+	53	1	1440985	1441485	AT1G05060	+	1560	NA	Yes	11025	11	0.070444	1100	-19.3471	0.001426	5	0.070444	500	-5.74437	49	1411	-3.71362	600	6	NA	NA	1.24399	1.84e-22
1	8877590	8878090	AT1G25320	+	1383	1	8868108	8868608	AT1G25320	+	96	Yes	NA	9482	10	0.070444	1000	-16.4048	0.022739	1	0.070444	100	-0.455635	1088	96	-14.0044	900	-6	NA	NA	1.97839	5.51e-41
1	24121525	24122025	AT1G64930	+	1184	1	24107493	24107993	AT1G64930	+	54	Yes	NA	14032	7	0.070444	700	-9.69361	1	1	0.070444	100	-0.451161	1028	39	-7.71089	600	-2	-5.42571	4.25e-14	NA	NA
1	23256983	23257483	AT1G62800	+	907	1	23250505	23251005	AT1G62800	+	111	Yes	NA	6478	6	0.070444	600	-7.52339	1	4	0.070444	400	-3.99896	944	94	-0.991197	200	2	-2.15312	2.61e-102	5.41559	3.15e-167
1	28452501	28453001	AT1G75780	+	77	1	28439649	28440149	AT1G75780	+	1376	NA	Yes	12852	11	0.070444	1100	-19.0396	0.0019	1	0.070444	100	-0.454036	63	1288	-16.6254	1000	-6	-1.99306	8.85e-14	1.20886	1.17e-22
1	483542	484042	AT1G02391	+	129	1	480919	481419	AT1G02391	+	470	Yes	Yes	2623	9	0.070444	900	-13.9237	0.229079	7	0.070444	700	-9.58513	83	430	-0.913321	200	4	NA	NA	NA	NA
1	11360044	11360544	AT1G31730	+	1261	1	11352032	11352532	AT1G31730	+	71	Yes	Yes	8012	8	0.070444	800	-11.8033	1	2	0.070444	200	-1.33092	1063	74	-5.54654	600	4	NA	NA	NA	NA
1	3915487	3915987	AT1G11650	+	89	1	3902608	3903108	AT1G11650	+	1722	NA	Yes	12879	6	0.070444	600	-7.54756	1	1	0.070444	100	-0.454441	69	1686	-5.70427	500	2	0.379277	0.0437287	3.72042	2.28e-55
1	19072455	19072955	AT1G51440	+	96	1	19066063	19066563	AT1G51440	+	1757	NA	Yes	6392	16	0.070444	1600	-32.7822	0	4	0.070444	400	-4.01271	68	1719	-11.7581	1200	-12	1.83771	0.000203003	-5.88876	3.67e-60
1	24948109	24948609	AT1G66880	+	555	1	24936091	24936591	AT1G66880	+	1285	Yes	Yes	12018	8	0.070444	800	-11.527	1	4	0.070444	400	-3.97179	413	1028	-2.21039	400	4	-0.586938	0.000937574	4.34791	5.96e-71
1	10200559	10201059	AT1G29180	+	1456	1	10193151	10193651	AT1G29180	+	114	Yes	Yes	7408	6	0.070444	600	-7.52083	1	2	0.070444	200	-1.3309	1499	119	-2.9735	400	2	-4.65168	4.17e-19	NA	NA
1	27478680	27479180	AT1G73060	+	598	1	27476958	27477458	AT1G73060	+	86	Yes	NA	1722	12	0.070444	1200	-21.588	0.000167	2	0.070444	200	-1.33091	405	94	-12.1106	1000	-8	3.12922	7.59e-64	NA	NA
1	11118631	11119131	AT1G31140	+	377	1	11115442	11115942	AT1G31140	+	75	Yes	NA	3189	8	0.070444	800	-11.7857	1	1	0.070444	100	-0.454036	409	63	-9.64875	700	-4	NA	NA	-0.546307	0.0126954
2	16898475	16898975	AT2G40460	+	207	2	16888994	16889494	AT2G40460	+	1007	Yes	Yes	9481	9	0.070444	900	-13.837	0.243409	3	0.070444	300	-2.52915	161	1004	-4.50034	600	4	NA	NA	NA	NA
1	24713587	24714087	AT1G66290	+	1891	1	24698654	24699154	AT1G66290	+	633	Yes	Yes	14933	6	0.070444	600	-7.44468	1	0	0	0	0	0	0	0	600	2	NA	NA	NA	NA
1	26420463	26420963	AT1G70160	+	1574	1	26418073	26418573	AT1G70160	+	135	Yes	NA	2390	21	0.070444	2100	-47.8292	0	8	0.070444	800	-11.6651	1445	124	-8.89746	1300	-18	0.779568	0.000299809	NA	NA
1	21446938	21447438	AT1G58007	+	1066	1	21442442	21442942	AT1G58007	+	71	Yes	NA	4496	10	0.070444	1000	-16.552	0.020157	6	0.070444	600	-7.66541	1052	46	-1.98123	400	6	-3.06612	1.39e-08	2.51403	2.94e-19
1	23506536	23507036	AT1G63390	+	162	1	23502119	23502619	AT1G63390	+	676	NA	Yes	4417	12	0.070444	1200	-21.2595	0.000221	11	0.070444	1100	-18.7092	159	543	-0.608049	100	8	NA	NA	6.1313	8.9e-119
2	13119517	13120017	AT2G30790	+	126	2	13100981	13101481	AT2G30790	+	1187	NA	Yes	18536	6	0.070444	600	-7.51185	1	3	0.070444	300	-2.53491	90	1439	-1.70458	300	2	4.21973	2.12e-30	-4.80841	9.43e-13
2	12969436	12969936	AT2G30432	+	302	2	12961519	12962019	AT2G30432	+	1146	Yes	Yes	7917	10	0.070444	1000	-16.132	0.028114	2	0.070444	200	-1.33089	329	911	-8.41239	800	-6	NA	NA	8.55442	4.63e-15
1	21159893	21160393	AT1G56500	+	1982	1	21136984	21137484	AT1G56500	+	124	Yes	NA	22909	6	0.070444	600	-7.51322	1	1	0.070444	100	-0.456023	1821	110	-5.66857	500	2	4.0111	3.33e-131	2.37347	3.67e-21
1	8483541	8484041	AT1G23970	+	890	1	8470567	8471067	AT1G23970	+	582	Yes	NA	12974	7	0.070444	700	-9.42026	1	4	0.070444	400	-3.97082	816	471	-1.54084	300	2	NA	NA	NA	NA
1	4280431	4280931	AT1G12570	+	69	1	4274467	4274967	AT1G12570	+	1065	NA	Yes	5964	8	0.070444	800	-11.8128	1	1	0.070444	100	-0.453259	54	925	-9.69361	700	-4	4.33362	3.37e-18	NA	NA
2	16256980	16257480	AT2G38940	+	1015	2	16247041	16247541	AT2G38940	+	602	Yes	Yes	9939	9	0.070444	900	-13.745	0.261282	6	0.070444	600	-7.44519	846	614	-1.36515	300	4	-2.17172	2.45e-47	NA	NA
1	3289539	3290039	AT1G10070	+	73	1	3279355	3279855	AT1G10070	+	567	NA	Yes	10184	6	0.070444	600	-7.57462	1	1	0.070444	100	-0.45372	59	494	-5.72079	500	2	NA	NA	-1.71792	6.28e-31
2	16470910	16471410	AT2G39445	+	170	2	16456023	16456523	AT2G39445	+	1216	NA	Yes	14887	6	0.070444	600	-7.48991	1	4	0.070444	400	-3.98818	135	1243	-0.991153	200	2	NA	NA	-3.96541	8.28e-134
2	15292345	15292845	AT2G36440	+	925	2	15279501	15280001	AT2G36440	+	96	Yes	NA	12844	8	0.070444	800	-11.7184	1	3	0.070444	300	-2.53972	899	66	-3.50511	500	4	NA	NA	-1.04106	0.00210162
1	10207152	10207652	AT1G29210	+	53	1	10194395	10194895	AT1G29210	+	1562	NA	Yes	12757	6	0.070444	600	-7.63255	1	1	0.070444	100	-0.454833	76	1333	-5.69537	500	2	NA	NA	NA	NA
1	6269057	6269557	AT1G18220	+	217	1	6267618	6268118	AT1G18220	+	790	Yes	Yes	1439	10	0.070444	1000	-16.1806	0.027016	8	0.070444	800	-11.5666	276	663	-0.897855	200	6	NA	NA	NA	NA
2	19400480	19400980	AT2G47250	+	51	2	19387553	19388053	AT2G47250	+	1354	NA	Yes	12927	8	0.070444	800	-11.9351	1	4	0.070444	400	-4.03536	47	1178	-2.2899	400	4	NA	NA	1.30184	0.000224934
1	28232425	28232925	AT1G75220	+	56	1	28209550	28210050	AT1G75220	+	1005	NA	Yes	22875	7	0.070444	700	-9.68233	1	1	0.070444	100	-0.453156	53	898	-7.63255	600	-2	NA	NA	-3.40784	0.000344258
2	8084407	8084907	AT2G18640	+	830	2	8081968	8082468	AT2G18640	+	70	Yes	NA	2439	15	0.070444	1500	-30.2556	0	5	0.070444	500	-5.70427	716	69	-7.88462	1000	-10	NA	NA	NA	NA
1	23833325	23833825	AT1G64230	+	459	1	23829556	23830056	AT1G64230	+	103	Yes	NA	3769	7	0.070444	700	-9.54692	1	6	0.070444	600	-7.52798	403	106	-0.581578	100	2	NA	NA	-0.99714	0.025896
1	24619937	24620437	AT1G66140	+	119	1	24613454	24613954	AT1G66140	+	680	NA	Yes	6483	6	0.070444	600	-7.51686	1	4	0.070444	400	-3.99616	102	706	-0.991184	200	2	-1.2462	4.97e-05	NA	NA
1	8579506	8580006	AT1G24220	+	97	1	8571918	8572418	AT1G24220	+	1449	NA	Yes	7588	18	0.070444	1800	-38.8517	0	4	0.070444	400	-4.00928	73	1132	-14.9199	1400	-14	NA	NA	NA	NA
2	14203030	14203530	AT2G33540	+	150	2	14194889	14195389	AT2G33540	+	645	NA	Yes	8141	6	0.070444	600	-7.49826	1	2	0.070444	200	-1.3309	182	554	-2.96315	400	2	0.453863	0.000281088	NA	NA
1	12009492	12009992	AT1G33120	+	42	1	11997416	11997916	AT1G33120	+	690	NA	Yes	12076	6	0.070444	600	-7.68942	1	3	0.070444	300	-2.5636	29	679	-1.74215	300	2	NA	NA	NA	NA
1	27516465	27516965	AT1G73177	+	138	1	27506021	27506521	AT1G73177	+	1225	NA	Yes	10444	7	0.070444	700	-9.50727	1	1	0.070444	100	-0.456323	124	1202	-7.51322	600	-2	NA	NA	-0.408167	0.00411256
1	24577334	24577834	AT1G66020	+	1049	1	24571330	24571830	AT1G66020	+	156	Yes	Yes	6004	7	0.070444	700	-9.49393	1	3	0.070444	300	-2.52814	948	187	-2.49757	400	2	-4.28271	6.31e-15	NA	NA
3	1453523	1454023	AT3G05160	+	76	3	1449005	1449505	AT3G05160	+	1996	NA	Yes	4518	25	0.070444	2500	-63.1094	0	14	0.070444	1400	-27.5306	61	1814	-5.79821	1100	24	1.02139	0.000308558	-5.35506	4.43e-26
3	609993	610493	AT3G02810	+	122	3	605165	605665	AT3G02810	+	1540	NA	Yes	4828	17	0.070444	1700	-35.4887	0	5	0.070444	500	-5.67725	96	1191	-10.2316	1200	-12	NA	NA	NA	NA
1	24285558	24286058	AT1G65370	+	1346	1	24262562	24263062	AT1G65370	+	161	Yes	NA	22996	6	0.070444	600	-7.49341	1	5	0.070444	500	-5.6543	1309	145	-0.575203	100	2	1.41438	2.27e-14	NA	NA
1	24690595	24691095	AT1G66245	+	122	1	24671028	24671528	AT1G66245	+	1524	NA	Yes	19567	9	0.070444	900	-13.937	0.227029	6	0.070444	600	-7.49686	153	1397	-1.37349	300	4	NA	NA	NA	NA
1	27914551	27915051	AT1G74230	+	1187	1	27898454	27898954	AT1G74230	+	48	Yes	NA	16097	6	0.070444	600	-7.65499	1	2	0.070444	200	-1.33097	1106	39	-3.0385	400	2	NA	NA	NA	NA
2	9347065	9347565	AT2G21920	+	1637	2	9319026	9319526	AT2G21920	+	146	Yes	NA	28039	7	0.070444	700	-9.50093	1	0	0	0	0	0	0	0	700	2	NA	NA	2.84846	3.37e-57
3	431531	432031	AT3G02260	+	66	3	420431	420931	AT3G02260	+	1410	NA	Yes	11100	6	0.070444	600	-7.59074	1	3	0.070444	300	-2.54378	54	1085	-1.7158	300	2	-0.495919	0.0385927	-6.92781	1.42e-05
1	27127452	27127952	AT1G72100	+	332	1	27122405	27122905	AT1G72100	+	588	NA	Yes	5047	14	0.070444	1400	-26.3625	2e-06	8	0.070444	800	-11.5785	240	634	-2.80427	600	10	NA	NA	NA	NA
2	9418431	9418931	AT2G22140	+	560	2	9412475	9412975	AT2G22140	+	94	Yes	NA	5956	7	0.070444	700	-9.56204	1	5	0.070444	500	-5.67725	626	96	-0.957119	200	2	0.965054	0.00563592	NA	NA
1	24434497	24434997	AT1G65700	+	143	1	24432415	24432915	AT1G65700	+	1560	NA	Yes	2082	34	0.070444	3400	-93.5949	0	12	0.070444	1200	-21.3493	130	1293	-16.5603	2200	-36	NA	NA	-4.4499	6.89e-25
2	13819564	13820064	AT2G32550	+	1775	2	13809042	13809542	AT2G32550	+	414	Yes	Yes	10522	13	0.070444	1300	-23.6408	2.3e-05	7	0.070444	700	-9.431	1412	415	-2.96001	600	8	1.07431	0.0199095	4.52586	1.33e-66
1	20285454	20285954	AT1G54340	+	130	1	20280502	20281002	AT1G54340	+	1255	Yes	Yes	4952	10	0.070444	1000	-16.2984	0.024664	3	0.070444	300	-2.53132	124	1276	-5.70588	700	6	-0.445162	6.12e-06	-1.92039	5.98e-06
1	4847505	4848005	AT1G14180	+	1470	1	4830017	4830517	AT1G14180	+	1563	Yes	Yes	17488	8	0.118824	474.273	-11.5029	1	4	0.103233	272.95	-3.96627	1423	1385	-1.53878	201.323	4	0.701289	3.24e-05	NA	NA
1	11558972	11559472	AT1G32130	+	103	1	11552657	11553157	AT1G32130	+	1329	NA	Yes	6315	17	0.070444	1700	-35.6934	0	8	0.070444	800	-11.6864	111	1034	-5.10413	900	14	NA	NA	3.63966	3.46e-62
2	13737525	13738025	AT2G32360	+	541	2	13712930	13713430	AT2G32360	+	1749	Yes	Yes	24595	7	0.070444	700	-9.42228	1	3	0.070444	300	-2.52446	461	1622	-2.4858	400	2	NA	NA	-2.10432	1.82e-20
1	22438004	22438504	AT1G60930	+	1885	1	22424535	22425035	AT1G60930	+	129	Yes	NA	13469	19	0.070444	1900	-41.546	0	7	0.070444	700	-9.55497	1747	98	-8.58237	1200	-16	0.837399	0.000201197	NA	NA
1	5620479	5620979	AT1G16460	+	68	1	5616462	5616962	AT1G16460	+	529	NA	Yes	4017	7	0.070444	700	-9.62918	1	3	0.070444	300	-2.54378	54	592	-2.54949	400	2	NA	NA	-4.95927	2.54e-40
1	24121601	24122101	AT1G64930	+	1184	1	24110019	24110519	AT1G64930	+	101	Yes	NA	11582	9	0.070444	900	-13.9886	0.219393	4	0.070444	400	-4.00993	1028	72	-3.07743	500	4	-5.42571	4.25e-14	-1.04223	0.000866905
1	23256037	23256537	AT1G62800	+	418	1	23252978	23253478	AT1G62800	+	103	Yes	NA	3059	8	0.070444	800	-11.7023	1	3	0.070444	300	-2.53448	392	93	-3.472	500	4	-2.15312	2.61e-102	-1.51927	2.8e-19
1	19012932	19013432	AT1G51290	+	1085	1	18988493	18988993	AT1G51290	+	835	Yes	Yes	24439	6	0.070444	600	-7.44071	1	2	0.070444	200	-1.33089	1201	857	-2.94804	400	2	NA	NA	NA	NA
2	11809018	11809518	AT2G27690	+	1227	2	11801539	11802039	AT2G27690	+	90	Yes	NA	7479	10	0.070444	1000	-16.4323	0.022248	3	0.070444	300	-2.53674	1206	79	-5.787	700	6	NA	NA	NA	NA
1	27555089	27555589	AT1G73280	+	1162	1	27544013	27544513	AT1G73280	+	60	Yes	NA	11076	7	0.070444	700	-9.66213	1	1	0.070444	100	-0.45305	1055	52	-7.63667	600	-2	-4.9589	4.17e-80	NA	NA
1	3895859	3896359	AT1G11592	+	146	1	3882936	3883436	AT1G11592	+	847	NA	Yes	12923	8	0.070444	800	-11.6379	1	5	0.070444	500	-5.6471	173	864	-1.44542	300	4	-0.542928	7.84e-05	NA	NA
1	28544973	28545473	AT1G76065	+	549	1	28543425	28543925	AT1G76065	+	972	NA	Yes	1548	38	0.070444	3800	-105.186	0	32	0.070444	3200	-83.618	438	783	-1.6001	600	40	NA	NA	NA	NA
1	24948185	24948685	AT1G66880	+	555	1	24938085	24938585	AT1G66880	+	663	Yes	Yes	10100	9	0.070444	900	-13.749	0.260516	4	0.070444	400	-3.97179	413	555	-2.99043	500	4	-0.586938	0.000937574	NA	NA
1	23890967	23891467	AT1G64380	+	1079	1	23881436	23881936	AT1G64380	+	123	Yes	NA	9531	10	0.070444	1000	-16.3153	0.024343	3	0.070444	300	-2.53314	908	104	-5.73285	700	6	NA	NA	NA	NA
2	16898026	16898526	AT2G40460	+	346	2	16892378	16892878	AT2G40460	+	635	Yes	Yes	5648	6	0.070444	600	-7.45836	1	4	0.070444	400	-3.97418	317	698	-0.991121	200	2	NA	NA	NA	NA
1	24714563	24715063	AT1G66290	+	446	1	24702573	24703073	AT1G66290	+	556	Yes	Yes	11990	6	0.070444	600	-7.45158	1	3	0.070444	300	-2.52416	602	524	-1.69144	300	2	NA	NA	-5.78626	5.83e-25
1	24952907	24953407	AT1G66880	+	167	1	24939603	24940103	AT1G66880	+	947	Yes	Yes	13304	7	0.070444	700	-9.48722	1	2	0.070444	200	-1.3309	167	992	-4.14042	500	2	-0.586938	0.000937574	NA	NA
1	23891510	23892010	AT1G64380	+	1013	1	23886442	23886942	AT1G64380	+	108	Yes	NA	5068	6	0.070444	600	-7.52609	1	3	0.070444	300	-2.53506	824	89	-1.70477	300	2	NA	NA	4.11628	1.73e-62
1	12877078	12877578	AT1G35180	+	84	1	12871099	12871599	AT1G35180	+	689	NA	Yes	5979	10	0.070444	1000	-16.464	0.021696	8	0.070444	800	-11.7372	89	652	-0.898084	200	6	3.86701	4.06e-36	NA	NA
2	702577	703077	AT2G02580	+	982	2	696427	696927	AT2G02580	+	72	Yes	NA	6150	7	0.070444	700	-9.61557	1	4	0.070444	400	-4.01847	861	61	-1.56342	300	2	NA	NA	NA	NA
1	26287605	26288105	AT1G69828	+	98	1	26279000	26279500	AT1G69828	+	1166	NA	Yes	8605	13	0.070444	1300	-24.1918	1.4e-05	4	0.070444	400	-4.01059	71	1065	-7.45185	900	-8	NA	NA	-4.50118	8.25e-96
1	12322088	12322588	AT1G33925	+	770	1	12308988	12309488	AT1G33925	+	1919	Yes	Yes	13100	15	0.076417	1382.74	-28.9546	0	5	0.070819	497.349	-5.61892	734	1842	-6.24619	885.39	10	NA	NA	NA	NA
1	11004378	11004878	AT1G30920	+	1612	1	10994569	10995069	AT1G30920	+	103	Yes	NA	9809	9	0.070444	900	-13.9828	0.220282	6	0.070444	600	-7.54105	1648	94	-1.38089	300	4	NA	NA	-0.298984	0.0357412
1	17276493	17276993	AT1G47056	+	1749	1	17263943	17264443	AT1G47056	+	35	Yes	NA	12550	8	0.070444	800	-12.1602	1	2	0.070444	200	-1.33097	1670	40	-5.68637	600	4	NA	NA	NA	NA
3	373052	373552	AT3G02110	+	979	3	369065	369565	AT3G02110	+	103	Yes	NA	3987	13	0.070444	1300	-24.1554	1.4e-05	7	0.070444	700	-9.65752	959	61	-3.15462	600	8	2.31352	4.58e-63	NA	NA
1	22683599	22684099	AT1G61480	+	1413	1	22673350	22673850	AT1G61480	+	90	Yes	NA	10249	7	0.070444	700	-9.56977	1	4	0.070444	400	-3.99616	1521	102	-1.55263	300	2	-5.67911	9.55e-37	1.38708	4.13e-06
1	29540043	29540543	AT1G78530	+	71	1	29532077	29532577	AT1G78530	+	986	NA	Yes	7966	6	0.070444	600	-7.57889	1	3	0.070444	300	-2.54607	49	939	-1.71876	300	2	2.50989	4.39e-16	NA	NA
3	1113915	1114415	AT3G04240	+	34	3	1107613	1108113	AT3G04240	+	1640	NA	Yes	6302	6	0.070444	600	-7.75577	1	2	0.070444	200	-1.33103	30	1356	-3.06968	400	2	NA	NA	8.79886	1.52e-68
1	24512559	24513059	AT1G65890	+	186	1	24509518	24510018	AT1G65890	+	1055	Yes	NA	3041	21	0.070444	2100	-47.4013	0	13	0.070444	1300	-23.8277	195	1112	-3.29164	800	18	NA	NA	NA	NA
1	21702560	21703060	AT1G58410	+	182	1	21676462	21676962	AT1G58410	+	984	Yes	Yes	26098	6	0.070444	600	-7.48579	1	0	0.070444	0	1.00326	154	813	1.00326	600	2	-2.73487	1.22e-19	1.76611	2.64e-19
1	8483481	8483981	AT1G23970	+	890	1	8478465	8478965	AT1G23970	+	142	Yes	NA	5016	7	0.070444	700	-9.50401	1	3	0.070444	300	-2.53348	816	101	-2.51493	400	2	NA	NA	NA	NA
2	9714	10214	AT2G01023	+	544	3	14199900	14200400	AT2G01023	+	590	Yes	Yes	interchromosomal	8	0.070444	800	-11.5278	1	4	0.070444	400	-3.9699	682	544	-2.20815	400	4	NA	NA	NA	NA
2	9330910	9331410	AT2G21890	+	1088	2	9320476	9320976	AT2G21890	+	256	Yes	Yes	10434	10	0.070444	1000	-16.1542	0.027603	3	0.070444	300	-2.52705	1139	227	-5.64383	700	6	NA	NA	-0.54699	5.3e-07
1	989404	989904	AT1G03890	+	112	1	977116	977616	AT1G03890	+	1901	NA	Yes	12288	6	0.070444	600	-7.52252	1	1	0.070444	100	-0.455757	100	1805	-5.67452	500	2	NA	NA	-2.24126	9.76e-08
1	18187021	18187521	AT1G49180	+	1556	1	18169542	18170042	AT1G49180	+	1147	Yes	Yes	17479	7	0.0923	534.244	-9.40718	1	2	0.079476	177.27	-1.33089	1324	1146	-2.94703	356.974	2	0.76339	1.7e-05	NA	NA
2	13119450	13119950	AT2G30790	+	126	2	13108458	13108958	AT2G30790	+	933	NA	Yes	10992	6	0.070444	600	-7.51185	1	2	0.070444	200	-1.33091	90	768	-2.9833	400	2	4.21973	2.12e-30	6.639	4.85e-101
1	3288544	3289044	AT1G10070	+	110	1	3284551	3285051	AT1G10070	+	1018	NA	Yes	3993	19	0.070444	1900	-41.7783	0	10	0.070444	1000	-16.4878	80	907	-4.70904	900	16	NA	NA	4.84125	2.03e-91
2	16256968	16257468	AT2G38940	+	1015	2	16248500	16249000	AT2G38940	+	440	Yes	Yes	8468	15	0.070444	1500	-29.0454	0	5	0.070444	500	-5.62705	846	378	-7.36949	1000	-10	-2.17172	2.45e-47	NA	NA
2	9844530	9845030	AT2G23130	+	1253	2	9839487	9839987	AT2G23130	+	66	Yes	NA	5043	7	0.070444	700	-9.63664	1	3	0.070444	300	-2.54607	954	49	-2.55738	400	2	5.27851	1.19e-45	0.93455	0.0393761
1	149535	150035	AT1G01390	+	1517	1	137889	138389	AT1G01390	+	60	Yes	NA	11646	6	0.070444	600	-7.60769	1	2	0.070444	200	-1.33093	1207	54	-3.01086	400	2	3.52792	4.78e-20	NA	NA
1	23337382	23337882	AT1G62990	+	1162	1	23323432	23323932	AT1G62990	+	140	Yes	NA	13950	7	0.070444	700	-9.50562	1	3	0.070444	300	-2.53325	994	103	-2.51419	400	2	-2.88685	7.27e-29	NA	NA
2	7395010	7395510	AT2G17010	+	75	2	7376936	7377436	AT2G17010	+	1059	NA	Yes	18074	6	0.070444	600	-7.57058	1	2	0.070444	200	-1.33092	70	1117	-2.99497	400	2	NA	NA	-5.23475	1.82e-40
2	16471013	16471513	AT2G39445	+	170	2	16460646	16461146	AT2G39445	+	1112	NA	Yes	10367	12	0.070444	1200	-21.2425	0.000224	3	0.070444	300	-2.53055	135	1185	-8.36213	900	-8	NA	NA	-3.04459	1.58e-19
2	14426014	14426514	AT2G34160	+	101	2	14413052	14413552	AT2G34160	+	1871	NA	Yes	12962	6	0.070444	600	-7.53304	1	4	0.070444	400	-3.99973	92	1729	-0.9912	200	2	0.307955	0.00815186	NA	NA
1	5578992	5579492	AT1G16310	+	334	1	5575000	5575500	AT1G16310	+	1501	Yes	Yes	3992	25	0.070444	2500	-59.8149	0	9	0.070444	900	-13.7725	382	1492	-10.9111	1600	-22	-1.93327	2.02e-21	-1.83896	9.8e-18
2	15145465	15145965	AT2G36070	+	169	2	15124556	15125056	AT2G36070	+	1270	NA	Yes	20909	8	0.070444	800	-11.6171	1	0	0.070444	0	1.00396	127	1139	1.00396	800	4	NA	NA	NA	NA
1	149573	150073	AT1G01390	+	1517	1	138399	138899	AT1G01390	+	49	Yes	NA	11174	8	0.070444	800	-11.9546	1	5	0.070444	500	-5.72079	1207	59	-1.4649	300	4	3.52792	4.78e-20	NA	NA
1	23337136	23337636	AT1G62990	+	1270	1	23329976	23330476	AT1G62990	+	167	Yes	Yes	7160	8	0.070444	800	-11.6187	1	2	0.070444	200	-1.3309	1139	206	-5.44858	600	4	-2.88685	7.27e-29	NA	NA
1	27499390	27499890	AT1G73130	+	1437	1	27491146	27491646	AT1G73130	+	123	Yes	NA	8244	6	0.070444	600	-7.51393	1	5	0.070444	500	-5.67518	1362	99	-0.572585	100	2	-1.18079	8.34e-09	NA	NA
1	19129989	19130489	AT1G51590	+	95	1	19126059	19126559	AT1G51590	+	1555	NA	Yes	3930	28	0.070444	2800	-73.0043	0	15	0.070444	1500	-30.1342	76	1347	-6.95116	1300	-28	-0.481048	0.00175067	1.00216	2.39e-10
1	24962571	24963071	AT1G66910	+	800	1	24942069	24942569	AT1G66910	+	668	Yes	Yes	20502	8	0.070444	800	-11.5204	1	1	0.070444	100	-0.458223	701	644	-9.4177	700	-4	5.73694	4.28e-86	NA	NA
1	24751404	24751904	AT1G66360	+	558	1	24724405	24724905	AT1G66360	+	641	Yes	Yes	26999	6	0.070444	600	-7.44689	1	0	0.070444	0	1.0009	557	609	1.0009	600	2	NA	NA	NA	NA
2	12492492	12492992	AT2G29080	+	1132	2	12478577	12479077	AT2G29080	+	1827	Yes	Yes	13915	6	0.106958	395.167	-7.43746	1	0	0	0	0	0	0	0	395.167	2	0.130048	0.0487208	-0.305132	0.00528616
1	22072004	22072504	AT1G59960	+	1134	1	22058550	22059050	AT1G59960	+	64	Yes	NA	13454	7	0.070444	700	-9.64458	1	6	0.070444	600	-7.60166	1154	62	-0.575287	100	2	-1.16083	2e-09	NA	NA
1	23834360	23834860	AT1G64230	+	588	1	23831552	23832052	AT1G64230	+	90	Yes	NA	2808	8	0.070444	800	-11.7343	1	5	0.070444	500	-5.68898	562	82	-1.45631	300	4	NA	NA	-3.62332	7.48e-19
2	17668643	17669143	AT2G42440	+	80	2	17657897	17658397	AT2G42440	+	1538	NA	Yes	10746	10	0.070444	1000	-16.4878	0.021285	4	0.070444	400	-4.00576	79	1295	-3.99726	600	6	NA	NA	NA	NA
2	11768530	11769030	AT2G27540	+	160	2	11765909	11766409	AT2G27540	+	1897	NA	Yes	2621	34	0.070444	3400	-93.1282	0	21	0.070444	2100	-47.5674	162	1621	-5.21279	1300	36	NA	NA	-5.58628	5.08e-08
1	18024898	18025398	AT1G48740	+	1989	1	18000441	18000941	AT1G48740	+	58	Yes	NA	24457	8	0.070444	800	-11.878	1	0	0	0	0	0	0	0	800	4	NA	NA	-4.99225	2.99e-27
1	24620032	24620532	AT1G66140	+	119	1	24614927	24615427	AT1G66140	+	960	NA	Yes	5105	14	0.070444	1400	-26.8118	1e-06	2	0.070444	200	-1.33091	102	1020	-15.9673	1200	-10	-1.2462	4.97e-05	5.55639	3.01e-150
1	3068008	3068508	AT1G09500	+	192	1	3061068	3061568	AT1G09500	+	1714	Yes	Yes	6940	19	0.070444	1900	-41.1177	0	9	0.070444	900	-13.8497	190	1637	-5.4556	1000	16	4.35477	3.1e-05	NA	NA
1	13156049	13156549	AT1G35620	+	45	1	13144583	13145083	AT1G35620	+	1039	NA	Yes	11466	9	0.070444	900	-14.3821	0.157388	6	0.070444	600	-7.70335	40	1127	-1.41031	300	4	NA	NA	-5.10423	2.77e-09
1	24728112	24728612	AT1G66320	+	1122	1	24707012	24707512	AT1G66320	+	209	Yes	Yes	21100	6	0.070444	600	-7.47828	1	2	0.070444	200	-1.3309	1100	178	-2.96358	400	2	NA	NA	-5.95777	6.66e-28
2	14203893	14204393	AT2G33540	+	101	2	14197019	14197519	AT2G33540	+	1818	NA	Yes	6874	12	0.070444	1200	-21.4821	0.000183	5	0.070444	500	-5.69205	79	1653	-4.51917	700	8	0.453863	0.000281088	NA	NA
2	1733544	1734044	AT2G04930	+	61	2	1726486	1726986	AT2G04930	+	455	NA	Yes	7058	11	0.070444	1100	-19.2157	0.001617	4	0.070444	400	-4.01422	66	689	-5.08146	700	6	NA	NA	NA	NA
1	27142569	27143069	AT1G72140	+	161	1	27131963	27132463	AT1G72140	+	1566	NA	Yes	10606	10	0.070444	1000	-16.2415	0.025757	5	0.070444	500	-5.66024	128	1574	-2.74571	500	6	-1.8537	0.000342048	-3.18708	3.23e-11
1	10634448	10634948	AT1G30220	+	1729	1	10625464	10625964	AT1G30220	+	140	Yes	NA	8984	9	0.070444	900	-13.9054	0.231945	3	0.070444	300	-2.53243	1626	111	-4.53292	600	4	NA	NA	NA	NA
1	24452149	24452649	AT1G65740	+	272	1	24445576	24446076	AT1G65740	+	180	Yes	Yes	6573	6	0.070444	600	-7.48644	1	1	0.070444	100	-0.456951	343	169	-5.64798	500	2	NA	NA	-2.97413	9.29e-27
1	1832441	1832941	AT1G06050	+	76	1	1826618	1827118	AT1G06050	+	1041	NA	Yes	5823	7	0.070444	700	-9.60344	1	1	0.070444	100	-0.454314	67	1040	-7.58823	600	-2	NA	NA	NA	NA
1	27516914	27517414	AT1G73177	+	114	1	27508643	27509143	AT1G73177	+	1486	NA	Yes	8271	6	0.070444	600	-7.52083	1	4	0.070444	400	-3.99896	94	1377	-0.991197	200	2	NA	NA	NA	NA
1	27914923	27915423	AT1G74230	+	1322	1	27902536	27903036	AT1G74230	+	49	Yes	NA	12387	8	0.070444	800	-11.9546	1	5	0.070444	500	-5.76405	1201	43	-1.47705	300	4	NA	NA	NA	NA
2	9343446	9343946	AT2G21920	+	174	2	9321885	9322385	AT2G21920	+	1569	Yes	Yes	21561	8	0.070444	800	-11.6134	1	2	0.070444	200	-1.3309	207	1227	-5.44832	600	4	NA	NA	-0.54699	5.3e-07
1	7465436	7465936	AT1G21320	+	1795	1	7453092	7453592	AT1G21320	+	60	Yes	NA	12344	10	0.070444	1000	-16.6583	0.018329	4	0.070444	400	-4.01198	1639	69	-4.02099	600	6	NA	NA	-5.17233	5.46e-62
1	20378921	20379421	AT1G54560	+	1335	1	20364016	20364516	AT1G54560	+	1312	Yes	Yes	14905	13	0.090582	1010.98	-23.5293	2.5e-05	4	0.088424	318.662	-3.96661	1394	1211	-7.02077	692.319	-8	NA	NA	2.52108	2.46e-128
1	27928852	27929352	AT1G74270	+	65	1	27914554	27915054	AT1G74270	+	1187	NA	Yes	14298	6	0.070444	600	-7.59334	1	1	0.070444	100	-0.452578	48	1106	-5.74729	500	2	-0.502943	0.00017695	NA	NA
2	1575431	1575931	AT2G04520	+	62	2	1564541	1565041	AT2G04520	+	1343	NA	Yes	10890	10	0.070444	1000	-16.636	0.018709	5	0.070444	500	-5.72277	58	1407	-2.82464	500	6	NA	NA	NA	NA
1	24690578	24691078	AT1G66245	+	122	1	24682930	24683430	AT1G66245	+	955	NA	Yes	7648	8	0.070444	800	-11.6681	1	3	0.070444	300	-2.52953	153	839	-3.44138	500	4	NA	NA	NA	NA
1	21234112	21234612	AT1G56650	+	1401	1	21200913	21201413	AT1G56650	+	71	Yes	NA	33199	6	0.070444	600	-7.57889	1	1	0.070444	100	-0.454314	1250	67	-5.70717	500	2	NA	NA	NA	NA
2	13822399	13822899	AT2G32550	+	148	2	13814646	13815146	AT2G32550	+	1008	Yes	Yes	7753	11	0.070444	1100	-18.7316	0.002453	1	0.070444	100	-0.456745	151	817	-16.2572	1000	-6	1.07431	0.0199095	4.39237	9.4e-44
2	13737511	13738011	AT2G32360	+	541	2	13716032	13716532	AT2G32360	+	1577	Yes	Yes	21479	6	0.070444	600	-7.44748	1	1	0.070444	100	-0.458044	461	1477	-5.62402	500	2	NA	NA	NA	NA
1	22438087	22438587	AT1G60930	+	1885	1	22428093	22428593	AT1G60930	+	41	Yes	NA	9994	7	0.070444	700	-9.79584	1	3	0.070444	300	-2.54607	1747	49	-2.55738	400	2	0.837399	0.000201197	NA	NA
1	1690861	1691361	AT1G05650	+	1161	1	1682985	1683485	AT1G05650	+	80	Yes	NA	7876	10	0.070444	1000	-16.4878	0.021285	5	0.070444	500	-5.72277	976	58	-2.82464	500	6	-5.49726	1.01e-09	1.33603	1.16e-17
1	18202135	18202635	AT1G49210	+	1469	1	18172089	18172589	AT1G49210	+	979	Yes	Yes	30046	6	0.074376	568.279	-7.43889	1	2	0.070444	200	-1.33089	1404	884	-2.94792	368.279	2	NA	NA	NA	NA
1	920908	921408	AT1G03700	+	89	1	916875	917375	AT1G03700	+	736	NA	Yes	4033	7	0.070444	700	-9.57181	1	1	0.070444	100	-0.454248	66	618	-7.59074	600	-2	-4.3504	6.85e-17	4.71622	1.43e-114
1	7284968	7285468	AT1G20920	+	89	1	7280436	7280936	AT1G20920	+	710	NA	Yes	4532	11	0.070444	1100	-18.9513	0.002051	6	0.070444	600	-7.63255	53	601	-2.63737	500	6	NA	NA	0.399063	0.00270658
1	22438494	22438994	AT1G60930	+	1256	1	22428548	22429048	AT1G60930	+	122	Yes	NA	9946	12	0.070444	1200	-21.3793	0.0002	6	0.070444	600	-7.53633	1201	98	-3.28333	600	8	0.837399	0.000201197	NA	NA
1	25188028	25188528	AT1G67280	+	74	1	25176138	25176638	AT1G67280	+	1163	NA	Yes	11890	6	0.070444	600	-7.57257	1	2	0.070444	200	-1.33093	54	656	-3.01086	400	2	2.00641	4.79e-20	2.70933	0.00029177
2	11809065	11809565	AT2G27690	+	1227	2	11805490	11805990	AT2G27690	+	154	Yes	NA	3575	24	0.070444	2400	-57.4881	0	10	0.070444	1000	-16.3287	1206	118	-8.91315	1400	-22	NA	NA	3.92967	1.35e-116
1	19012483	19012983	AT1G51290	+	1701	1	18991069	18991569	AT1G51290	+	1364	Yes	Yes	21414	13	0.11999	763.202	-23.5273	2.5e-05	2	0.130465	107.988	-1.33089	1845	1350	-15.4304	655.213	-8	NA	NA	NA	NA
1	27555113	27555613	AT1G73280	+	1162	1	27545414	27545914	AT1G73280	+	91	Yes	NA	9699	7	0.070444	700	-9.56777	1	4	0.070444	400	-4.01669	1055	63	-1.56254	300	2	-4.9589	4.17e-80	-0.948557	7.39e-06
1	16963439	16963939	AT1G44890	+	1407	1	16934034	16934534	AT1G44890	+	84	Yes	NA	29405	12	0.070444	1200	-21.6051	0.000165	4	0.070444	400	-4.00522	1307	80	-6.16625	800	8	4.40266	6.96e-38	NA	NA
3	192885	193385	AT3G01490	+	1348	3	173942	174442	AT3G01490	+	135	Yes	NA	18943	6	0.070444	600	-7.50617	1	1	0.070444	100	-0.456023	989	110	-5.66857	500	2	6.28291	0	NA	NA
1	24950013	24950513	AT1G66880	+	201	1	24941901	24942401	AT1G66880	+	668	Yes	Yes	8112	7	0.070444	700	-9.47119	1	1	0.070444	100	-0.457108	186	644	-7.48454	600	-2	-0.586938	0.000937574	NA	NA
1	3895004	3895504	AT1G11592	+	134	1	3888999	3889499	AT1G11592	+	1643	NA	Yes	6005	15	0.070444	1500	-29.5468	0	6	0.070444	600	-7.51464	122	1785	-5.8834	900	10	-0.542928	7.84e-05	-3.75507	2.6e-34
1	18928011	18928511	AT1G51070	+	100	1	18920469	18920969	AT1G51070	+	1196	NA	Yes	7542	8	0.070444	800	-11.7089	1	4	0.070444	400	-4.00139	88	1272	-2.2463	400	4	-1.25483	1.89e-17	NA	NA
1	23890539	23891039	AT1G64380	+	207	1	23887392	23887892	AT1G64380	+	376	Yes	Yes	3147	10	0.070444	1000	-16.189	0.026832	4	0.070444	400	-3.9811	190	330	-3.90642	600	6	NA	NA	6.87376	2.88e-13
1	3137003	3137503	AT1G09690	+	121	1	3133349	3133849	AT1G09690	+	452	NA	Yes	3654	15	0.070444	1500	-29.627	0	6	0.070444	600	-7.53096	103	428	-5.93644	900	10	NA	NA	NA	NA
1	7929518	7930018	AT1G22460	+	141	1	7923038	7923538	AT1G22460	+	1123	NA	Yes	6480	15	0.070444	1500	-29.51	0	4	0.070444	400	-3.99522	105	981	-9.9558	1100	-10	-4.31593	6.04e-13	-5.47066	1.86e-30
1	24712983	24713483	AT1G66290	+	332	1	24709201	24709701	AT1G66290	+	516	Yes	Yes	3782	9	0.070444	900	-13.7839	0.253559	1	0.070444	100	-0.45806	485	473	-11.5338	800	-4	NA	NA	-5.95777	6.66e-28
1	29202576	29203076	AT1G77690	+	665	1	29195040	29195540	AT1G77690	+	919	Yes	Yes	7536	9	0.070444	900	-13.7404	0.262094	2	0.070444	200	-1.33089	683	909	-6.8385	700	4	-2.14842	7.45e-16	-0.480897	0.00504695
1	29201589	29202089	AT1G77690	+	156	1	29196598	29197098	AT1G77690	+	654	Yes	NA	4991	10	0.070444	1000	-16.2491	0.025605	5	0.070444	500	-5.6372	236	486	-2.7181	500	6	-2.14842	7.45e-16	NA	NA
1	12187592	12188092	AT1G33607	+	49	1	12180918	12181418	AT1G33607	+	1585	NA	Yes	6674	7	0.070444	700	-9.72611	1	5	0.070444	500	-5.76405	43	1342	-0.957592	200	2	NA	NA	4.97643	5.67e-141
2	13291023	13291523	AT2G31190	+	121	2	13284889	13285389	AT2G31190	+	1285	NA	Yes	6134	8	0.070444	800	-11.6696	1	6	0.070444	600	-7.53411	100	1110	-0.932303	200	4	1.37758	3.14e-16	1.98731	2.79e-25
2	16504517	16505017	AT2G39560	+	171	2	16492150	16492650	AT2G39560	+	1216	NA	Yes	12367	6	0.070444	600	-7.48954	1	2	0.070444	200	-1.3309	164	1208	-2.96528	400	2	1.26184	6.48e-05	NA	NA
2	702478	702978	AT2G02580	+	982	2	700041	700541	AT2G02580	+	127	Yes	NA	2437	21	0.070444	2100	-47.9296	0	11	0.070444	1100	-18.9995	861	82	-5.25791	1000	18	NA	NA	0.247159	0.00114978
2	7829403	7829903	AT2G18000	+	1614	2	7821516	7822016	AT2G18000	+	61	Yes	NA	7887	6	0.070444	600	-7.60462	1	4	0.070444	400	-4.04044	1651	44	-0.991512	200	2	-2.00931	8.12e-16	NA	NA
2	7829462	7829962	AT2G18000	+	1614	2	7823520	7824020	AT2G18000	+	144	Yes	NA	5942	16	0.070444	1600	-32.3749	0	8	0.070444	800	-11.6467	1651	138	-4.24298	800	12	-2.00931	8.12e-16	NA	NA
1	7909523	7910023	AT1G22403	+	1104	1	7904065	7904565	AT1G22403	+	184	Yes	Yes	5458	10	0.070444	1000	-16.2119	0.026351	3	0.070444	300	-2.52893	1224	166	-5.67101	700	6	0.630505	0.000465152	1.07901	2.06e-09
2	8340983	8341483	AT2G19220	+	52	2	8329558	8330058	AT2G19220	+	1544	NA	Yes	11425	7	0.070444	700	-9.70582	1	3	0.070444	300	-2.54891	44	1509	-2.56723	400	2	NA	NA	1.20009	0.00736079
3	1118416	1118916	AT3G04240	+	72	3	1111628	1112128	AT3G04240	+	822	NA	Yes	6788	7	0.070444	700	-9.61557	1	2	0.070444	200	-1.33094	49	696	-4.24284	500	2	NA	NA	-3.36061	1.1e-07
1	18481560	18482060	AT1G49920	+	155	1	18479874	18480374	AT1G49920	+	508	NA	Yes	1686	23	0.070444	2300	-54.1423	0	6	0.070444	600	-7.49779	151	590	-15.6311	1700	-20	NA	NA	NA	NA
1	26278537	26279037	AT1G69810	+	1378	1	26249536	26250036	AT1G69810	+	78	Yes	NA	29001	6	0.070444	600	-7.56493	1	4	0.070444	400	-4.02462	1105	55	-0.991364	200	2	-4.50118	8.25e-96	NA	NA
1	17397010	17397510	AT1G47420	+	1406	1	17394016	17394516	AT1G47420	+	247	Yes	Yes	2994	20	0.070444	2000	-44.002	0	11	0.070444	1100	-18.561	1395	317	-4.13875	900	16	-0.530693	9.05e-05	NA	NA
2	9844498	9844998	AT2G23130	+	1253	2	9840037	9840537	AT2G23130	+	51	Yes	NA	4461	10	0.070444	1000	-16.7824	0.016313	5	0.070444	500	-5.74729	954	48	-2.85733	500	6	5.27851	1.19e-45	NA	NA
1	149600	150100	AT1G01390	+	1517	1	142396	142896	AT1G01390	+	85	Yes	NA	7204	6	0.070444	600	-7.55334	1	1	0.070444	100	-0.454248	1207	66	-5.70869	500	2	3.52792	4.78e-20	-0.713243	1.19e-05
2	7263094	7263594	AT2G16730	+	94	2	7255456	7255956	AT2G16730	+	1024	Yes	Yes	7638	6	0.070444	600	-7.54105	1	1	0.070444	100	-0.455698	98	842	-5.67586	500	2	NA	NA	-3.48769	1.24e-76
1	3533554	3534054	AT1G10660	+	52	1	3530598	3531098	AT1G10660	+	533	NA	Yes	2956	11	0.070444	1100	-19.3667	0.001399	4	0.070444	400	-4.07449	31	494	-5.45471	700	6	0.439233	0.024346	6.1809	1.23e-34
1	23337080	23337580	AT1G62990	+	1270	1	23333001	23333501	AT1G62990	+	263	Yes	NA	4079	20	0.070444	2000	-43.9572	0	6	0.070444	600	-7.47757	1139	212	-11.346	1400	-16	-2.88685	7.27e-29	-6.12073	1.95e-75
2	15292397	15292897	AT2G36440	+	925	2	15290909	15291409	AT2G36440	+	975	Yes	Yes	1488	43	0.070444	4300	-123.457	0	32	0.070444	3200	-83.1295	899	784	-3.04502	1100	48	NA	NA	NA	NA
1	23337040	23337540	AT1G62990	+	1270	1	23333504	23334004	AT1G62990	+	759	Yes	Yes	3536	22	0.070444	2200	-49.707	0	9	0.070444	900	-13.7404	1139	666	-7.83678	1300	-18	-2.88685	7.27e-29	NA	NA
1	4661999	4662499	AT1G13608	+	200	1	4658978	4659478	AT1G13608	+	826	Yes	Yes	3021	10	0.070444	1000	-16.1954	0.026696	4	0.070444	400	-3.98258	175	854	-3.91175	600	6	NA	NA	NA	NA
1	19930568	19931068	AT1G53420	+	911	1	19924523	19925023	AT1G53420	+	80	Yes	NA	6045	15	0.070444	1500	-30.0642	0	9	0.070444	900	-14.1181	819	71	-2.80641	600	10	NA	NA	0.375188	0.000510066
1	27499411	27499911	AT1G73130	+	1437	1	27495431	27495931	AT1G73130	+	689	Yes	Yes	3980	9	0.070444	900	-13.7389	0.262348	5	0.070444	500	-5.61964	1362	677	-2.02045	400	4	-1.18079	8.34e-09	4.69572	6.01e-228
1	4662001	4662501	AT1G13608	+	200	1	4660919	4661419	AT1G13608	+	446	Yes	Yes	1082	10	0.070444	1000	-16.1954	0.026696	4	0.070444	400	-3.98258	175	433	-3.91175	600	6	NA	NA	NA	NA
2	18534930	18535430	AT2G44940	+	67	2	18525086	18525586	AT2G44940	+	1962	NA	Yes	9844	7	0.070444	700	-9.63285	1	4	0.070444	400	-4.02242	57	1566	-1.56537	300	2	NA	NA	5.88317	4.03e-100
2	18070975	18071475	AT2G43535	+	1282	2	18065567	18066067	AT2G43535	+	166	Yes	Yes	5408	8	0.070444	800	-11.6195	1	3	0.070444	300	-2.5276	1067	205	-3.42963	500	4	-2.87708	1.5e-16	1.15731	0.000711335
1	24751064	24751564	AT1G66360	+	420	1	24728106	24728606	AT1G66360	+	1122	Yes	Yes	22958	7	0.070444	700	-9.43055	1	3	0.070444	300	-2.52491	391	1100	-2.48722	400	2	NA	NA	NA	NA
2	15067516	15068016	AT2G35890	+	158	2	15049095	15049595	AT2G35890	+	1645	Yes	Yes	18421	8	0.070444	800	-11.6263	1	3	0.070444	300	-2.52818	186	1565	-3.43315	500	4	-5.44029	7.67e-17	-2.48051	1.93e-21
1	25865921	25866421	AT1G68820	+	91	1	25838454	25838954	AT1G68820	+	1711	NA	Yes	27467	7	0.070444	700	-9.56777	1	2	0.070444	200	-1.33091	81	1431	-4.18441	500	2	-0.869165	0.0013736	0.268	0.0151746
3	127507	128007	AT3G01340	+	103	3	114962	115462	AT3G01340	+	1005	NA	Yes	12545	6	0.070444	600	-7.53096	1	3	0.070444	300	-2.53303	105	853	-1.70226	300	2	0.327776	0.0350971	NA	NA
2	18383523	18384023	AT2G44530	+	66	2	18365454	18365954	AT2G44530	+	1783	NA	Yes	18069	7	0.070444	700	-9.63664	1	0	0	0	0	0	0	0	700	2	0.416671	7.47e-07	0.9889	7.06e-10
3	126865	127365	AT3G01340	+	124	3	115842	116342	AT3G01340	+	1090	NA	Yes	11023	8	0.070444	800	-11.6651	1	6	0.070444	600	-7.54105	94	991	-0.932321	200	4	0.327776	0.0350971	NA	NA
1	24728133	24728633	AT1G66320	+	1122	1	24713899	24714399	AT1G66320	+	1322	Yes	Yes	14234	7	0.07671	642.819	-9.40748	1	4	0.084468	333.588	-3.96688	1100	1466	-2.2046	309.23	2	NA	NA	NA	NA
2	14203607	14204107	AT2G33540	+	235	2	14197914	14198414	AT2G33540	+	451	NA	Yes	5693	9	0.070444	900	-13.8201	0.246497	3	0.070444	300	-2.52857	175	438	-4.49464	600	4	0.453863	0.000281088	1.23058	1.75e-08
1	12933027	12933527	AT1G35250	+	1133	1	12908933	12909433	AT1G35250	+	110	Yes	NA	24094	9	0.070444	900	-13.964	0.223077	4	0.070444	400	-4.01941	1080	60	-3.10011	500	4	-4.91412	1.59e-18	-0.805535	3.58e-11
3	127951	128451	AT3G01340	+	128	3	118619	119119	AT3G01340	+	779	NA	Yes	9332	8	0.070444	800	-11.6594	1	2	0.070444	200	-1.33091	100	787	-5.50607	600	4	0.327776	0.0350971	NA	NA
1	29748014	29748514	AT1G79080	+	76	1	29741562	29742062	AT1G79080	+	1302	NA	Yes	6452	9	0.070444	900	-14.089	0.204066	2	0.070444	200	-1.33092	74	1001	-7.03852	700	-4	1.13125	2.3e-15	0.379746	0.0102956
1	4447967	4448467	AT1G13040	+	1540	1	4439979	4440479	AT1G13040	+	78	Yes	NA	7988	7	0.070444	700	-9.59786	1	5	0.070444	500	-5.73382	1532	53	-0.957384	200	2	-0.54745	0.0361488	NA	NA
2	11407421	11407921	AT2G26770	+	58	2	11393494	11393994	AT2G26770	+	1840	NA	Yes	13927	8	0.070444	800	-11.878	1	5	0.070444	500	-5.72482	57	1541	-1.466	300	4	0.561326	1e-08	5.03452	1.67e-138
2	10399982	10400482	AT2G24490	+	1512	2	10381475	10381975	AT2G24490	+	81	Yes	NA	18507	8	0.070444	800	-11.7628	1	3	0.070444	300	-2.53568	1366	85	-3.47951	500	4	-0.451562	0.0206252	0.743658	1.2e-05
1	10013947	10014447	AT1G28480	+	1684	1	9993613	9994113	AT1G28480	+	648	Yes	Yes	20334	6	0.070444	600	-7.4443	1	4	0.070444	400	-3.96955	1623	577	-0.991116	200	2	-2.88496	0.00138109	NA	NA
1	2031990	2032490	AT1G06640	+	58	1	2026018	2026518	AT1G06640	+	973	NA	Yes	5972	9	0.070444	900	-14.2185	0.183177	5	0.070444	500	-5.75353	46	952	-2.11123	400	4	-2.10361	1.8e-22	-3.37003	6.46e-24
1	27516898	27517398	AT1G73177	+	114	1	27513410	27513910	AT1G73177	+	1010	NA	Yes	3488	16	0.070444	1600	-32.587	0	4	0.070444	400	-3.99896	94	993	-11.477	1200	-12	NA	NA	1.65866	5.35e-22
1	1918587	1919087	AT1G06270	+	1490	1	1902565	1903065	AT1G06270	+	80	Yes	NA	16022	6	0.070444	600	-7.56141	1	3	0.070444	300	-2.53325	1502	103	-1.70253	300	2	-0.465622	0.00685792	NA	NA
1	1078456	1078956	AT1G04140	+	56	1	1070095	1070595	AT1G04140	+	1990	NA	Yes	8361	11	0.070444	1100	-19.293	0.001502	3	0.070444	300	-2.55831	33	1691	-7.60087	800	-6	NA	NA	-0.795305	0.000113092
1	27142474	27142974	AT1G72140	+	161	1	27137866	27138366	AT1G72140	+	820	NA	Yes	4608	16	0.070444	1600	-32.2912	0	6	0.070444	600	-7.51052	128	663	-6.89084	1000	12	-1.8537	0.000342048	NA	NA
1	10634474	10634974	AT1G30220	+	1729	1	10630484	10630984	AT1G30220	+	727	Yes	Yes	3990	35	0.070444	3500	-93.8936	0	19	0.070444	1900	-40.518	1626	676	-6.89202	1600	36	NA	NA	2.68153	6.76e-07
1	1830995	1831495	AT1G06050	+	233	1	1829008	1829508	AT1G06050	+	1902	NA	Yes	1987	29	0.070444	2900	-73.923	0	20	0.070444	2000	-44.0853	222	1662	-3.11591	900	28	NA	NA	2.1941	1.29e-28
1	24526549	24527049	AT1G65920	+	67	1	24513568	24514068	AT1G65920	+	1235	NA	Yes	12981	7	0.070444	700	-9.63285	1	1	0.070444	100	-0.454379	68	1196	-7.58578	600	-2	NA	NA	NA	NA
2	6697880	6698380	AT2G15370	+	63	2	6689053	6689553	AT2G15370	+	1440	NA	Yes	8827	12	0.070444	1200	-21.8562	0.00013	9	0.070444	900	-14.2489	55	1532	-1.26366	300	8	-5.97974	9.96e-12	NA	NA
1	24285605	24286105	AT1G65370	+	1346	1	24269075	24269575	AT1G65370	+	129	Yes	NA	16530	8	0.070444	800	-11.6581	1	4	0.070444	400	-3.98237	1309	177	-2.223	400	4	1.41438	2.27e-14	NA	NA
1	1918454	1918954	AT1G06270	+	1490	1	1905916	1906416	AT1G06270	+	61	Yes	NA	12538	7	0.070444	700	-9.65752	1	2	0.070444	200	-1.33092	1502	62	-4.21145	500	2	-0.465622	0.00685792	NA	NA
1	20374879	20375379	AT1G54560	+	114	1	20366872	20367372	AT1G54560	+	1054	Yes	Yes	8007	6	0.070444	600	-7.52083	1	4	0.070444	400	-3.98713	141	1012	-0.99115	200	2	NA	NA	-2.85996	1.97e-09
1	24285607	24286107	AT1G65370	+	1346	1	24271112	24271612	AT1G65370	+	99	Yes	NA	14495	6	0.070444	600	-7.53521	1	2	0.070444	200	-1.3309	1309	124	-2.97229	400	2	1.41438	2.27e-14	NA	NA
1	8315045	8315545	AT1G23410	+	785	1	8309538	8310038	AT1G23410	+	110	Yes	NA	5507	12	0.070444	1200	-21.433	0.000191	5	0.070444	500	-5.66911	750	109	-4.45225	700	8	NA	NA	2.69861	3.51e-113
1	4072980	4073480	AT1G12050	+	143	1	4065162	4065662	AT1G12050	+	1452	NA	Yes	7818	16	0.070444	1600	-32.3805	0	9	0.070444	900	-13.9828	103	1178	-3.37226	700	12	0.948467	3.99e-11	5.19074	1.99e-26
1	22370946	22371446	AT1G60780	+	1717	1	22354005	22354505	AT1G60780	+	99	Yes	NA	16941	6	0.070444	600	-7.53521	1	1	0.070444	100	-0.45305	1683	52	-5.7363	500	2	NA	NA	1.2262	3e-08
1	1690071	1690571	AT1G05650	+	124	1	1689018	1689518	AT1G05650	+	817	Yes	Yes	1053	14	0.070444	1400	-26.7828	1e-06	6	0.070444	600	-7.51322	124	736	-4.92764	800	10	-5.49726	1.01e-09	-0.852887	8.73e-06
1	22436906	22437406	AT1G60930	+	127	1	22429607	22430107	AT1G60930	+	746	Yes	Yes	7299	8	0.070444	800	-11.6608	1	1	0.070444	100	-0.456432	130	677	-9.51441	700	-4	0.837399	0.000201197	NA	NA
2	7312057	7312557	AT2G16880	+	161	2	7311105	7311605	AT2G16880	+	863	NA	Yes	952	30	0.070444	3000	-78.3316	0	10	0.070444	1000	-16.2659	146	740	-15.4334	2000	-30	NA	NA	-1.49655	2.33e-16
1	20080602	20081102	AT1G53790	+	1662	1	20064941	20065441	AT1G53790	+	91	Yes	NA	15661	6	0.070444	600	-7.54487	1	4	0.070444	400	-4.0047	1570	81	-0.991226	200	2	-1.7157	1.37e-21	NA	NA
1	30347494	30347994	AT1G80745	+	103	1	30335968	30336468	AT1G80745	+	935	NA	Yes	11526	7	0.070444	700	-9.54692	1	3	0.070444	300	-2.53844	71	905	-2.53142	400	2	NA	NA	-0.345834	0.0331247
2	7953073	7953573	AT2G18300	+	86	2	7939970	7940470	AT2G18300	+	1856	NA	Yes	13103	6	0.070444	600	-7.55185	1	5	0.070444	500	-5.68102	91	1706	-0.571852	100	2	5.96182	4.11e-136	NA	NA
2	12697986	12698486	AT2G29700	+	288	2	12675528	12676028	AT2G29700	+	1796	NA	Yes	22458	9	0.070444	900	-13.7973	0.250978	5	0.070444	500	-5.6372	236	1523	-2.0316	400	4	NA	NA	5.05488	4.11e-138
1	19012533	19013033	AT1G51290	+	1701	1	18997034	18997534	AT1G51290	+	617	Yes	Yes	15499	10	0.070444	1000	-16.0693	0.029585	4	0.07567	372.374	-3.96807	1845	783	-4.83285	627.626	6	NA	NA	NA	NA
1	27555080	27555580	AT1G73280	+	1162	1	27547401	27547901	AT1G73280	+	108	Yes	NA	7679	14	0.070444	1400	-26.8856	1e-06	6	0.070444	600	-7.54896	1055	88	-5.01651	800	10	-4.9589	4.17e-80	-5.11613	7.11e-22
2	11528014	11528514	AT2G27020	+	254	2	11524419	11524919	AT2G27020	+	1791	NA	Yes	3595	29	0.070444	2900	-73.7764	0	12	0.070444	1200	-21.2234	180	1802	-10.559	1700	-28	NA	NA	-5.41539	3.96e-51
1	24947466	24947966	AT1G66880	+	134	1	24945570	24946070	AT1G66880	+	1012	Yes	Yes	1896	8	0.070444	800	-11.6516	1	3	0.070444	300	-2.52915	161	980	-3.43907	500	4	-0.586938	0.000937574	NA	NA
1	118979	119479	AT1G01305	+	664	1	112479	112979	AT1G01305	+	131	Yes	NA	6500	13	0.070444	1300	-24.005	1.6e-05	6	0.070444	600	-7.53864	502	96	-4.09743	700	8	NA	NA	NA	NA
1	28219647	28220147	AT1G75190	+	29	1	28217815	28218315	AT1G75190	+	568	NA	Yes	1832	6	0.070444	600	-7.81763	1	4	0.070444	400	-4.03697	46	501	-0.991477	200	2	1.52931	2.93e-27	1.83352	1.74e-72
1	23891495	23891995	AT1G64380	+	1013	1	23888922	23889422	AT1G64380	+	916	Yes	Yes	2573	23	0.070444	2300	-52.8191	0	19	0.070444	1900	-40.4819	824	801	-1.29971	400	20	NA	NA	0.975519	0.00583792
1	25527006	25527506	AT1G68120	+	82	1	25521069	25521569	AT1G68120	+	1187	NA	Yes	5937	9	0.070444	900	-14.0591	0.208687	3	0.070444	300	-2.54713	47	1087	-4.68615	600	4	NA	NA	-0.685109	2.28e-08
2	13516562	13517062	AT2G31780	+	49	2	13508996	13509496	AT2G31780	+	1377	NA	Yes	7566	12	0.070444	1200	-22.1561	9.7e-05	3	0.070444	300	-2.5477	46	1254	-8.85531	900	-8	NA	NA	NA	NA
1	17888405	17888905	AT1G48410	+	61	1	17883634	17884134	AT1G48410	+	738	Yes	Yes	4771	8	0.070444	800	-11.8577	1	1	0.070444	100	-0.452703	49	581	-9.72611	700	-4	NA	NA	NA	NA
2	13291014	13291514	AT2G31190	+	121	2	13287042	13287542	AT2G31190	+	527	NA	Yes	3972	9	0.070444	900	-13.9391	0.226743	5	0.070444	500	-5.67452	100	563	-2.05603	400	4	1.37758	3.14e-16	-3.58299	2.21e-13
1	26760402	26760902	AT1G70970	+	94	1	26749075	26749575	AT1G70970	+	1776	NA	Yes	11327	7	0.070444	700	-9.56204	1	4	0.070444	400	-3.99522	105	1618	-1.55218	300	2	NA	NA	NA	NA
2	8566974	8567474	AT2G19850	+	48	2	8551021	8551521	AT2G19850	+	1105	NA	Yes	15953	6	0.070444	600	-7.65499	1	2	0.070444	200	-1.33096	41	1073	-3.03356	400	2	NA	NA	1.38052	2.06e-06
2	16505023	16505523	AT2G39560	+	192	2	16497091	16497591	AT2G39560	+	1365	NA	Yes	7932	6	0.070444	600	-7.48276	1	3	0.070444	300	-2.52814	187	1143	-1.69626	300	2	1.26184	6.48e-05	NA	NA
2	7829431	7829931	AT2G18000	+	1614	2	7824538	7825038	AT2G18000	+	157	Yes	NA	4893	19	0.070444	1900	-41.3112	0	12	0.070444	1200	-21.3564	1651	128	-2.92382	700	16	-2.00931	8.12e-16	-0.378082	0.000310835
3	1173488	1173988	AT3G04420	+	1718	3	1159070	1159570	AT3G04420	+	64	Yes	NA	14418	7	0.070444	700	-9.64458	1	1	0.070444	100	-0.451351	1496	40	-7.70335	600	-2	-3.16016	3.81e-12	-4.9533	2.97e-15
1	26760350	26760850	AT1G70970	+	94	1	26752173	26752673	AT1G70970	+	791	NA	Yes	8177	6	0.070444	600	-7.54105	1	5	0.070444	500	-5.6714	105	793	-0.573059	100	2	NA	NA	NA	NA
1	24226547	24227047	AT1G65220	+	99	1	24222433	24222933	AT1G65220	+	1398	NA	Yes	4114	16	0.070444	1600	-32.7444	0	6	0.070444	600	-7.58342	69	1294	-7.20366	1000	-12	-0.39818	1.18e-07	NA	NA
1	29487496	29487996	AT1G78380	+	1031	1	29463093	29463593	AT1G78380	+	85	Yes	NA	24403	6	0.070444	600	-7.55334	1	3	0.070444	300	-2.5477	916	46	-1.72087	300	2	-0.608156	0.00376162	-0.747102	0.00033676
2	16497437	16497937	AT2G39520	+	1641	2	16487567	16488067	AT2G39520	+	124	Yes	NA	9870	8	0.070444	800	-11.6651	1	2	0.070444	200	-1.3309	1169	107	-5.49864	600	4	NA	NA	NA	NA
1	21718117	21718617	AT1G58450	+	1160	1	21704097	21704597	AT1G58450	+	321	Yes	Yes	14020	6	0.070444	600	-7.46071	1	5	0.070444	500	-5.63479	879	259	-0.577645	100	2	NA	NA	-2.73487	1.22e-19
1	27872908	27873408	AT1G74120	+	1907	1	27864584	27865084	AT1G74120	+	82	Yes	NA	8324	13	0.070444	1300	-24.34	1.2e-05	7	0.070444	700	-9.62562	1632	69	-3.12525	600	8	NA	NA	-0.908614	0.000565407
1	22683541	22684041	AT1G61480	+	1413	1	22680514	22681014	AT1G61480	+	260	Yes	NA	3027	43	0.070444	4300	-126.03	0	29	0.070444	2900	-73.6423	1521	277	-4.65525	1400	48	-5.67911	9.55e-37	NA	NA
1	21159924	21160424	AT1G56500	+	1982	1	21149050	21149550	AT1G56500	+	160	Yes	Yes	10874	17	0.070444	1700	-35.2314	0	7	0.070444	700	-9.51073	1821	134	-6.33901	1000	12	4.0111	3.33e-131	NA	NA
3	319431	319931	AT3G01930	+	85	3	313501	314001	AT3G01930	+	1752	NA	Yes	5930	11	0.070444	1100	-18.9778	0.002005	5	0.070444	500	-5.70717	67	1746	-3.63477	600	6	-1.56231	2.61e-25	-5.31644	9.4e-16
1	29395523	29396023	AT1G78120	+	889	1	29374553	29375053	AT1G78120	+	1027	Yes	Yes	20970	6	0.070444	600	-7.43996	1	3	0.070444	300	-2.52363	690	912	-1.69081	300	2	-3.40686	9.75e-40	-2.32204	1.94e-25
1	990018	990518	AT1G03890	+	98	1	983073	983573	AT1G03890	+	1968	NA	Yes	6945	9	0.070444	900	-13.9979	0.217969	3	0.070444	300	-2.53262	109	1482	-4.53487	600	4	NA	NA	NA	NA
1	18187113	18187613	AT1G49180	+	1556	1	18173937	18174437	AT1G49180	+	881	Yes	Yes	13176	9	0.070894	894.276	-13.7299	0.264048	2	0.070444	200	-1.33089	1324	758	-6.83621	694.276	4	0.76339	1.7e-05	NA	NA
2	10757574	10758074	AT2G25260	+	791	2	10744052	10744552	AT2G25260	+	109	Yes	NA	13522	7	0.070444	700	-9.53827	1	1	0.070444	100	-0.455603	732	95	-7.53983	600	-2	-5.18142	7.21e-105	NA	NA
1	25267958	25268458	AT1G67455	+	1053	1	25250520	25251020	AT1G67455	+	1140	Yes	Yes	17438	7	0.070444	700	-9.40838	1	0	0.070444	0	1.00048	1144	1039	1.00048	700	2	NA	NA	2.80221	7e-27
2	11818449	11818949	AT2G27720	+	94	2	11810063	11810563	AT2G27720	+	1613	NA	Yes	8386	8	0.070444	800	-11.7235	1	5	0.070444	500	-5.69205	79	1556	-1.45712	300	4	NA	NA	NA	NA
2	9844578	9845078	AT2G23130	+	1253	2	9842064	9842564	AT2G23130	+	66	Yes	NA	2514	14	0.070444	1400	-27.4143	1e-06	9	0.070444	900	-14.2	954	60	-2.242	500	10	5.27851	1.19e-45	0.909611	0.0147048
1	149537	150037	AT1G01390	+	1517	1	144030	144530	AT1G01390	+	90	Yes	NA	5507	16	0.070444	1600	-32.8659	0	6	0.070444	600	-7.57462	1207	73	-7.16429	1000	-12	3.52792	4.78e-20	NA	NA
2	12685018	12685518	AT2G29670	+	704	2	12675488	12675988	AT2G29670	+	1796	Yes	Yes	9530	8	0.070444	800	-11.5188	1	1	0.070444	100	-0.458197	609	1523	-9.41908	700	-4	5.03881	9.42e-104	5.05488	4.11e-138
1	20833992	20834492	AT1G55730	+	1472	1	20801924	20802424	AT1G55730	+	1000	Yes	Yes	32068	6	0.076126	555.211	-7.43866	1	4	0.070444	400	-3.96767	1187	867	-0.991115	155.211	2	-1.48068	7.14e-25	NA	NA
1	17491827	17492327	AT1G47600	+	585	1	17484528	17485028	AT1G47600	+	138	Yes	NA	7299	9	0.070444	900	-13.9085	0.231447	5	0.070444	500	-5.66318	558	121	-2.04851	400	4	-5.95029	9.39e-17	NA	NA
1	6332823	6333323	AT1G18400	+	548	1	6327383	6327883	AT1G18400	+	140	Yes	Yes	5440	7	0.070444	700	-9.50562	1	1	0.070444	100	-0.456622	377	142	-7.50227	600	-2	1.54095	0.00359173	-1.86191	3.95e-10
1	29210040	29210540	AT1G77720	+	930	1	29200529	29201029	AT1G77720	+	104	Yes	Yes	9511	7	0.070444	700	-9.54541	1	5	0.070444	500	-5.66911	1155	109	-0.957094	200	2	NA	NA	-2.14842	7.45e-16
1	27501015	27501515	AT1G73130	+	323	1	27497531	27498031	AT1G73130	+	1806	Yes	Yes	3484	20	0.070444	2000	-43.8299	0	9	0.070444	900	-13.8013	277	1871	-6.20341	1100	16	-1.18079	8.34e-09	-2.30453	2.45e-09
2	13321587	13322087	AT2G31260	+	1187	2	13296984	13297484	AT2G31260	+	111	Yes	NA	24603	7	0.070444	700	-9.5356	1	3	0.070444	300	-2.53188	1010	117	-2.50971	400	2	-0.50624	0.000815138	NA	NA
2	8964509	8965009	AT2G20820	+	73	2	8955391	8955891	AT2G20820	+	1645	NA	Yes	9118	12	0.070444	1200	-21.7173	0.000149	4	0.070444	400	-4.01502	65	1660	-6.24315	800	8	-0.844212	3.14e-15	NA	NA
2	18070946	18071446	AT2G43535	+	1282	2	18067450	18067950	AT2G43535	+	1044	Yes	Yes	3496	28	0.070444	2800	-69.1946	0	15	0.070444	1500	-28.9389	1067	885	-5.79279	1300	26	-2.87708	1.5e-16	NA	NA
2	12685045	12685545	AT2G29670	+	704	2	12676960	12677460	AT2G29670	+	317	Yes	NA	8085	6	0.070444	600	-7.46113	1	3	0.070444	300	-2.52661	609	248	-1.6944	300	2	5.03881	9.42e-104	NA	NA
2	12492453	12492953	AT2G29080	+	1132	2	12488552	12489052	AT2G29080	+	59	Yes	NA	3901	9	0.070444	900	-14.2091	0.184707	1	0.070444	100	-0.453634	1118	58	-11.878	800	-4	0.130048	0.0487208	-1.36314	8.52e-11
2	15068441	15068941	AT2G35890	+	1353	2	15051484	15051984	AT2G35890	+	570	Yes	Yes	16957	9	0.070444	900	-13.7476	0.260787	4	0.070444	400	-3.96928	1212	606	-2.98494	500	4	-5.44029	7.67e-17	6.08614	7.55e-134
1	22071326	22071826	AT1G59960	+	493	1	22065558	22066058	AT1G59960	+	168	Yes	NA	5768	7	0.070444	700	-9.48666	1	1	0.070444	100	-0.45587	355	104	-7.52995	600	-2	-1.16083	2e-09	-5.11481	4.36e-11
1	22704625	22705125	AT1G61550	+	75	1	22689389	22689889	AT1G61550	+	1987	NA	Yes	15236	6	0.070444	600	-7.57058	1	4	0.070444	400	-4.01198	69	1681	-0.99127	200	2	NA	NA	1.16092	1.61e-10
2	711929	712429	AT2G02610	+	685	2	703048	703548	AT2G02610	+	710	Yes	Yes	8881	7	0.070444	700	-9.41626	1	3	0.070444	300	-2.52374	703	648	-2.48351	400	2	-6.02036	8.14e-34	NA	NA
1	26706473	26706973	AT1G70820	+	758	1	26703100	26703600	AT1G70820	+	125	Yes	NA	3373	6	0.070444	600	-7.51253	1	2	0.070444	200	-1.3309	662	117	-2.97402	400	2	7.33724	3.3e-150	-1.80475	8.11e-07
1	12933036	12933536	AT1G35250	+	1133	1	12917475	12917975	AT1G35250	+	81	Yes	NA	15561	9	0.070444	900	-14.0638	0.207998	4	0.070444	400	-4.01502	1080	65	-3.08956	500	4	-4.91412	1.59e-18	NA	NA
2	10399907	10400407	AT2G24490	+	1512	2	10386308	10386808	AT2G24490	+	77	Yes	NA	13599	7	0.070444	700	-9.60061	1	2	0.070444	200	-1.33092	1366	63	-4.2096	500	2	-0.451562	0.0206252	-5.26045	9.43e-53
1	435599	436099	AT1G02230	+	1373	1	420700	421200	AT1G02230	+	43	Yes	NA	14899	7	0.070444	700	-9.7758	1	1	0.070444	100	-0.451865	1354	43	-7.68298	600	-2	-2.31598	0.000229357	4.55936	5.78e-28
1	10013982	10014482	AT1G28480	+	1684	1	9997494	9997994	AT1G28480	+	112	Yes	NA	16488	9	0.070444	900	-13.9591	0.223784	5	0.070444	500	-5.6655	1623	116	-2.05004	400	4	-2.88496	0.00138109	NA	NA
1	18024899	18025399	AT1G48740	+	1989	1	18010457	18010957	AT1G48740	+	72	Yes	NA	14442	8	0.070444	800	-11.7987	1	0	0	0	0	0	0	0	800	4	NA	NA	NA	NA
1	26450048	26450548	AT1G70230	+	77	1	26447522	26448022	AT1G70230	+	1837	NA	Yes	2526	10	0.070444	1000	-16.5075	0.020938	5	0.070444	500	-5.69774	74	1833	-2.79231	500	6	NA	NA	NA	NA
1	1918535	1919035	AT1G06270	+	1490	1	1910511	1911011	AT1G06270	+	75	Yes	NA	8024	9	0.070444	900	-14.0945	0.203183	1	0.070444	100	-0.452578	1502	48	-11.965	800	-4	-0.465622	0.00685792	NA	NA
2	9354960	9355460	AT2G21960	+	90	2	9347024	9347524	AT2G21960	+	1637	NA	Yes	7936	7	0.070444	700	-9.56977	1	0	0	0	0	0	0	0	700	2	3.55757	1.76e-140	NA	NA
1	24461571	24462071	AT1G65770	+	1636	1	24429917	24430417	AT1G65770	+	411	Yes	Yes	31654	6	0.070444	600	-7.45358	1	4	0.070444	400	-3.97219	1528	393	-0.991118	200	2	NA	NA	NA	NA
2	9345388	9345888	AT2G21920	+	395	2	9330896	9331396	AT2G21920	+	1088	Yes	Yes	14492	8	0.070444	800	-11.5428	1	5	0.070444	500	-5.62373	471	1139	-1.43956	300	4	NA	NA	NA	NA
2	13896029	13896529	AT2G32770	+	100	2	13887042	13887542	AT2G32770	+	1041	NA	Yes	8987	7	0.070444	700	-9.55165	1	3	0.070444	300	-2.53506	89	973	-2.52014	400	2	5.79567	2.31e-14	-3.00634	7.36e-05
1	20372422	20372922	AT1G54560	+	167	1	20368368	20368868	AT1G54560	+	461	Yes	Yes	4054	9	0.070444	900	-13.8711	0.237552	1	0.070444	100	-0.457056	180	443	-11.6091	800	-4	NA	NA	-6.19378	5.4e-28
1	7529961	7530461	AT1G21500	+	231	1	7520609	7521109	AT1G21500	+	1643	Yes	Yes	9352	6	0.070444	600	-7.47347	1	4	0.070444	400	-3.98461	158	1648	-0.991143	200	2	7.23357	0	0.316091	0.0132188
1	22119552	22120052	AT1G60040	+	887	1	22080507	22081007	AT1G60040	+	868	Yes	Yes	39045	6	0.070444	600	-7.44024	1	3	0.070444	300	-2.52344	858	778	-1.69059	300	2	NA	NA	0.46724	0.00830871
1	30370914	30371414	AT1G80820	+	1960	1	30358094	30358594	AT1G80820	+	66	Yes	NA	12820	9	0.070444	900	-14.1517	0.193953	0	0	0	0	0	0	0	900	4	-3.46808	7.84e-27	NA	NA
1	4847424	4847924	AT1G14180	+	1470	1	4839014	4839514	AT1G14180	+	133	Yes	NA	8410	12	0.070444	1200	-21.3389	0.000207	8	0.070444	800	-11.6681	1423	122	-1.73009	400	8	0.701289	3.24e-05	0.509904	0.000111729
1	22370972	22371472	AT1G60780	+	1717	1	22354986	22355486	AT1G60780	+	47	Yes	NA	15986	6	0.070444	600	-7.66008	1	3	0.070444	300	-2.54607	1683	49	-1.71876	300	2	NA	NA	NA	NA
1	30347503	30348003	AT1G80745	+	103	1	30340102	30340602	AT1G80745	+	1125	NA	Yes	7401	9	0.070444	900	-13.9828	0.220282	6	0.070444	600	-7.57889	71	1190	-1.38742	300	4	NA	NA	-2.46092	4.42e-05
2	1084886	1085386	AT2G03570	+	25	2	1081605	1082105	AT2G03570	+	1107	NA	Yes	3281	8	0.070444	800	-12.4702	0.927037	5	0.070444	500	-5.88519	25	1084	-1.51429	300	4	NA	NA	NA	NA
1	12294418	12294918	AT1G33860	+	263	1	12287980	12288480	AT1G33860	+	1097	Yes	Yes	6438	9	0.070444	900	-13.8069	0.24911	4	0.070444	400	-3.97534	285	837	-2.99825	500	4	NA	NA	NA	NA
1	19013004	19013504	AT1G51290	+	1085	1	19000468	19000968	AT1G51290	+	1133	Yes	Yes	12536	21	0.070444	2100	-46.5105	0	10	0.070444	1000	-16.043	1201	1102	-5.71275	1100	18	NA	NA	NA	NA
3	192665	193165	AT3G01490	+	692	3	189545	190045	AT3G01490	+	481	Yes	Yes	3120	22	0.070444	2200	-49.8716	0	12	0.070444	1200	-21.0648	616	357	-4.57382	1000	18	6.28291	0	4.73789	0
1	27555140	27555640	AT1G73280	+	1162	1	27551068	27551568	AT1G73280	+	71	Yes	NA	4072	17	0.070444	1700	-36.3113	0	7	0.070444	700	-9.66213	1055	60	-6.79377	1000	14	-4.9589	4.17e-80	-5.28286	1.94e-73
2	11528968	11529468	AT2G27020	+	167	2	11527325	11527825	AT2G27020	+	670	NA	Yes	1643	24	0.070444	2400	-57.3448	0	7	0.070444	700	-9.52144	123	768	-14.621	1700	-22	NA	NA	-5.39978	1.35e-28
1	119046	119546	AT1G01305	+	664	1	115503	116003	AT1G01305	+	91	Yes	NA	3543	11	0.070444	1100	-18.939	0.002073	2	0.070444	200	-1.33091	502	87	-10.3244	900	-6	NA	NA	0.288641	0.0298237
1	1730961	1731461	AT1G05785	+	1750	1	1702485	1702985	AT1G05785	+	134	Yes	NA	28476	6	0.070444	600	-7.50677	1	1	0.070444	100	-0.455503	1850	92	-5.68023	500	2	-0.88673	0.00378558	6.95174	2.34e-62
1	2207935	2208435	AT1G07190	+	104	1	2204433	2204933	AT1G07190	+	1979	NA	Yes	3502	38	0.070444	3800	-111.35	0	25	0.070444	2500	-62.8185	81	1645	-5.63312	1300	42	NA	NA	7.05513	6.95e-94
1	26759419	26759919	AT1G70970	+	81	1	26752949	26753449	AT1G70970	+	1988	NA	Yes	6470	19	0.070444	1900	-42.3638	0	9	0.070444	900	-14.2091	59	1817	-6.06052	1000	16	NA	NA	-1.90802	3.06e-06
1	11039011	11039511	AT1G30960	+	64	1	11036008	11036508	AT1G30960	+	640	NA	Yes	3003	15	0.070444	1500	-30.4021	0	4	0.070444	400	-4.02578	54	624	-10.4737	1100	-10	NA	NA	NA	NA
2	12322964	12323464	AT2G28710	+	1912	2	12304512	12305012	AT2G28710	+	73	Yes	NA	18452	6	0.070444	600	-7.57462	1	5	0.070444	500	-5.70289	1881	70	-0.569102	100	2	-2.40112	2.44e-05	NA	NA
2	17395802	17396302	AT2G41700	+	1714	2	17362025	17362525	AT2G41700	+	123	Yes	NA	33777	6	0.070444	600	-7.51393	1	4	0.070444	400	-3.98912	1466	130	-0.991157	200	2	-0.20774	0.00727362	NA	NA
1	29614352	29614852	AT1G78750	+	1306	1	29603530	29604030	AT1G78750	+	140	Yes	NA	10822	7	0.070444	700	-9.50562	1	2	0.070444	200	-1.3309	1344	115	-4.15894	500	2	NA	NA	NA	NA
3	1173502	1174002	AT3G04420	+	1718	3	1164060	1164560	AT3G04420	+	73	Yes	NA	9442	9	0.070444	900	-14.106	0.201338	2	0.070444	200	-1.33095	1496	47	-7.17797	700	-4	-3.16016	3.81e-12	NA	NA
1	29487100	29487600	AT1G78380	+	1239	1	29464554	29465054	AT1G78380	+	108	Yes	NA	22546	8	0.070444	800	-11.6921	1	4	0.070444	400	-4.00139	1056	88	-2.2463	400	4	-0.608156	0.00376162	NA	NA
1	21182428	21182928	AT1G56540	+	797	1	21159973	21160473	AT1G56540	+	1982	Yes	Yes	22455	7	0.081694	603.602	-9.41309	1	2	0.070444	200	-1.33089	718	1821	-2.94882	403.602	2	0.944678	1.14e-05	4.0111	3.33e-131
1	21718081	21718581	AT1G58450	+	1160	1	21707997	21708497	AT1G58450	+	136	Yes	NA	10084	6	0.070444	600	-7.50559	1	2	0.070444	200	-1.33091	879	99	-2.97963	400	2	NA	NA	1.08326	0.0433754
1	20171028	20171528	AT1G54040	+	141	1	20155905	20156405	AT1G54040	+	1769	Yes	Yes	15123	11	0.070444	1100	-18.7477	0.002421	4	0.070444	400	-3.99463	107	1563	-4.97241	700	6	6.73511	1.24e-31	-5.58652	2.26e-43
3	319528	320028	AT3G01930	+	85	3	316558	317058	AT3G01930	+	1785	NA	Yes	2970	17	0.070444	1700	-35.9789	0	9	0.070444	900	-14.1446	67	1417	-4.23766	800	14	-1.56231	2.61e-25	0.624721	2.9e-08
1	26278504	26279004	AT1G69810	+	1378	1	26268966	26269466	AT1G69810	+	113	Yes	Yes	9538	7	0.070444	700	-9.53302	1	3	0.070444	300	-2.53293	1105	106	-2.51313	400	2	-4.50118	8.25e-96	-2.57454	2.56e-11
1	16153909	16154409	AT1G43010	+	334	1	16151967	16152467	AT1G43010	+	60	Yes	NA	1942	11	0.070444	1100	-19.23	0.001595	5	0.070444	500	-5.73144	324	54	-3.68575	600	6	-4.90588	2.36e-08	NA	NA
1	4806432	4806932	AT1G14030	+	1333	1	4799500	4800000	AT1G14030	+	78	Yes	NA	6932	7	0.070444	700	-9.59786	1	2	0.070444	200	-1.33092	1194	62	-4.21145	500	2	3.49445	3.78e-137	NA	NA
1	21703998	21704498	AT1G58410	+	321	1	21693956	21694456	AT1G58410	+	1128	Yes	Yes	10042	13	0.070444	1300	-23.6885	2.2e-05	4	0.070444	400	-3.97649	259	1198	-7.11285	900	-8	-2.73487	1.22e-19	NA	NA
1	19755045	19755545	AT1G53023	+	1035	1	19740948	19741448	AT1G53023	+	69	Yes	Yes	14097	6	0.070444	600	-7.58342	1	2	0.070444	200	-1.33092	1050	69	-2.99574	400	2	NA	NA	NA	NA
1	17494028	17494528	AT1G47600	+	63	1	17486045	17486545	AT1G47600	+	1335	Yes	Yes	7983	7	0.070444	700	-9.64875	1	3	0.070444	300	-2.54378	54	973	-2.54949	400	2	-5.95029	9.39e-17	2.89665	6.83e-71
2	7353503	7354003	AT2G16950	+	60	2	7338466	7338966	AT2G16950	+	1682	NA	Yes	15037	11	0.070444	1100	-19.23	0.001595	2	0.070444	200	-1.33093	55	1801	-10.5452	900	-6	-0.379558	1.74e-07	-0.470267	1.24e-08
2	10757488	10757988	AT2G25260	+	791	2	10747593	10748093	AT2G25260	+	799	Yes	Yes	9895	9	0.070444	900	-13.7336	0.263357	2	0.070444	200	-1.33089	732	818	-6.83695	700	4	-5.18142	7.21e-105	NA	NA
1	19026062	19026562	AT1G51320	+	1978	1	19000416	19000916	AT1G51320	+	1133	Yes	Yes	25646	6	0.1159	364.678	-7.43745	1	4	0.100264	281.032	-3.96687	1737	1102	-0.991114	83.6462	2	NA	NA	NA	NA
1	149544	150044	AT1G01390	+	1517	1	146993	147493	AT1G01390	+	484	Yes	Yes	2551	37	0.070444	3700	-101.642	0	26	0.070444	2600	-62.97	1207	412	-3.45392	1100	38	3.52792	4.78e-20	NA	NA
2	10210943	10211443	AT2G24000	+	868	2	10205582	10206082	AT2G24000	+	51	Yes	NA	5361	10	0.070444	1000	-16.7824	0.016313	3	0.070444	300	-2.54891	750	44	-5.97874	700	6	NA	NA	0.992389	0.0140534
2	6669975	6670475	AT2G15325	+	74	2	6664546	6665046	AT2G15325	+	1647	NA	Yes	5429	21	0.070444	2100	-49.2113	0	12	0.070444	1200	-21.8098	66	1606	-4.46079	900	18	NA	NA	NA	NA
1	6410027	6410527	AT1G18620	+	1200	1	6397041	6397541	AT1G18620	+	53	Yes	NA	12986	6	0.070444	600	-7.63255	1	2	0.070444	200	-1.33095	1060	46	-3.02322	400	2	3.08494	2.08e-40	-0.283882	0.0450444
2	11825402	11825902	AT2G27760	+	102	2	11823053	11823553	AT2G27760	+	623	NA	Yes	2349	15	0.070444	1500	-29.7833	0	8	0.070444	800	-11.7288	92	773	-3.58566	700	10	NA	NA	-1.2289	0.000195145
1	2217524	2218024	AT1G07220	+	51	1	2204417	2204917	AT1G07220	+	1979	NA	Yes	13107	10	0.070444	1000	-16.7824	0.016313	4	0.070444	400	-4.03866	45	1645	-4.12674	600	6	-0.615325	0.00149902	7.05513	6.95e-94
1	24824532	24825032	AT1G66540	+	1736	1	24806916	24807416	AT1G66540	+	1000	Yes	Yes	17616	8	0.089779	627.704	-11.5097	1	2	0.092999	151.494	-1.33089	1647	1078	-5.40607	476.21	4	NA	NA	-2.29214	2.54e-25
2	12684103	12684603	AT2G29670	+	1032	2	12680415	12680915	AT2G29670	+	109	Yes	NA	3688	8	0.070444	800	-11.6902	1	3	0.070444	300	-2.53252	833	110	-3.45981	500	4	5.03881	9.42e-104	-1.65603	0.000456503
3	826006	826506	AT3G03470	+	1201	3	815956	816456	AT3G03470	+	62	Yes	NA	10050	7	0.070444	700	-9.65306	1	6	0.070444	600	-7.61756	1015	57	-0.573923	100	2	1.56915	0.00412117	-0.939248	0.00342685
1	20833482	20833982	AT1G55730	+	1201	1	20802934	20803434	AT1G55730	+	1396	Yes	Yes	30548	7	0.086707	568.701	-9.40658	1	4	0.070444	400	-3.9672	993	1213	-0.991115	168.701	2	-1.48068	7.14e-25	6.99079	3.59e-125
1	10303078	10303578	AT1G29430	+	1645	1	10289451	10289951	AT1G29430	+	169	Yes	NA	13627	11	0.070444	1100	-18.6914	0.002535	6	0.070444	600	-7.48003	1368	202	-2.51564	500	6	6.46144	4.7e-38	6.12543	3.73e-52
2	17767416	17767916	AT2G42660	+	1541	2	17757527	17758027	AT2G42660	+	67	Yes	NA	9889	8	0.070444	800	-11.823	1	4	0.070444	400	-4.02038	1438	59	-2.27034	400	4	-4.91572	1.49e-13	NA	NA
2	13321590	13322090	AT2G31260	+	1187	2	13303501	13304001	AT2G31260	+	97	Yes	NA	18089	13	0.070444	1300	-24.1995	1.4e-05	2	0.070444	200	-1.33091	1010	85	-14.0783	1100	-8	-0.50624	0.000815138	NA	NA
2	16927503	16928003	AT2G40530	+	143	2	16923419	16923919	AT2G40530	+	626	NA	Yes	4084	12	0.070444	1200	-21.3078	0.000212	6	0.070444	600	-7.50923	130	469	-3.25002	600	8	NA	NA	5.15635	7.36e-78
1	24751900	24752400	AT1G66360	+	739	1	24737110	24737610	AT1G66360	+	71	Yes	NA	14790	6	0.070444	600	-7.57889	1	1	0.070444	100	-0.454931	711	78	-5.69313	500	2	NA	NA	-0.30685	0.0072418
2	15068915	15069415	AT2G35890	+	1430	2	15052948	15053448	AT2G35890	+	1903	Yes	Yes	15967	10	0.140735	500.541	-16.0354	0.03039	8	0.149436	377.116	-11.5019	1571	1816	-1.2621	123.425	6	-5.44029	7.67e-17	6.26675	3.76e-71
1	20833556	20834056	AT1G55730	+	1201	1	20803494	20803994	AT1G55730	+	979	Yes	Yes	30062	6	0.070444	600	-7.43889	1	1	0.070444	100	-0.458309	993	796	-5.61825	500	2	-1.48068	7.14e-25	0.947874	1.96e-05
1	20051083	20051583	AT1G53705	+	242	1	20033936	20034436	AT1G53705	+	587	NA	Yes	17147	6	0.070444	600	-7.4714	1	2	0.070444	200	-1.3309	195	615	-2.96185	400	2	NA	NA	-4.06863	5.21e-14
1	1168078	1168578	AT1G04360	+	1140	1	1156535	1157035	AT1G04360	+	69	Yes	NA	11543	6	0.070444	600	-7.58342	1	2	0.070444	200	-1.33093	814	57	-3.00717	400	2	-1.35568	9.97e-05	NA	NA
1	435588	436088	AT1G02230	+	1373	1	427527	428027	AT1G02230	+	107	Yes	NA	8061	13	0.070444	1300	-24.1288	1.5e-05	6	0.070444	600	-7.5462	1354	90	-4.11125	700	8	-2.31598	0.000229357	NA	NA
1	21888434	21888934	AT1G59590	+	88	1	21879851	21880351	AT1G59590	+	1049	NA	Yes	8583	6	0.070444	600	-7.54896	1	1	0.070444	100	-0.454248	66	822	-5.70869	500	2	-1.21717	0.00752113	NA	NA
1	24751406	24751906	AT1G66360	+	558	1	24737975	24738475	AT1G66360	+	136	Yes	NA	13431	7	0.070444	700	-9.50897	1	3	0.070444	300	-2.53074	557	132	-2.50599	400	2	NA	NA	NA	NA
1	2888485	2888985	AT1G08990	+	1794	1	2870036	2870536	AT1G08990	+	44	Yes	NA	18449	7	0.070444	700	-9.76651	1	3	0.070444	300	-2.55422	1643	37	-2.58598	400	2	-5.64644	2.23e-50	NA	NA
1	20041466	20041966	AT1G53687	+	118	1	20034573	20035073	AT1G53687	+	940	NA	Yes	6893	6	0.070444	600	-7.51763	1	3	0.070444	300	-2.53233	112	848	-1.70139	300	2	NA	NA	-4.06863	5.21e-14
1	11938064	11938564	AT1G32940	+	29	1	11925471	11925971	AT1G32940	+	1853	NA	Yes	12593	6	0.070444	600	-7.81763	1	2	0.070444	200	-1.3311	24	1785	-3.10515	400	2	-0.892087	0.0207454	NA	NA
1	20439942	20440442	AT1G54780	+	688	1	20422613	20423113	AT1G54780	+	905	Yes	Yes	17329	7	0.070444	700	-9.41616	1	2	0.070444	200	-1.33089	667	802	-4.11039	500	2	6.35194	0	NA	NA
1	12933545	12934045	AT1G35250	+	1027	1	12931011	12931511	AT1G35250	+	116	Yes	NA	2534	17	0.070444	1700	-35.5457	0	14	0.070444	1400	-26.959	940	99	-1.1313	300	12	-4.91412	1.59e-18	NA	NA
2	10399978	10400478	AT2G24490	+	1512	2	10390638	10391138	AT2G24490	+	149	Yes	NA	9340	12	0.070444	1200	-21.2912	0.000215	4	0.070444	400	-3.98893	1366	131	-6.04292	800	8	-0.451562	0.0206252	NA	NA
1	4447966	4448466	AT1G13040	+	1540	1	4444918	4445418	AT1G13040	+	67	Yes	NA	3048	18	0.070444	1800	-39.6058	0	4	0.070444	400	-4.00865	1532	74	-14.9012	1400	-14	-0.54745	0.0361488	NA	NA
1	10013948	10014448	AT1G28480	+	1684	1	10003637	10004137	AT1G28480	+	204	Yes	Yes	10311	10	0.070444	1000	-16.1917	0.026779	6	0.070444	600	-7.49028	1623	169	-1.90381	400	6	-2.88496	0.00138109	NA	NA
2	10328532	10329032	AT2G24270	+	57	2	10321493	10321993	AT2G24270	+	394	NA	Yes	7039	7	0.070444	700	-9.677	1	1	0.070444	100	-0.454441	69	329	-7.58342	600	-2	5.75371	3.53e-46	-3.36031	1.07e-36
1	1919485	1919985	AT1G06270	+	1015	1	1911050	1911550	AT1G06270	+	62	Yes	NA	8435	10	0.070444	1000	-16.636	0.018709	2	0.070444	200	-1.33093	794	58	-8.74859	800	-6	-0.465622	0.00685792	1.3557	8.11e-11
1	10547404	10547904	AT1G30070	+	737	1	10514975	10515475	AT1G30070	+	91	Yes	NA	32429	8	0.070444	800	-11.7315	1	3	0.070444	300	-2.53674	601	79	-3.48619	500	4	NA	NA	NA	NA
1	19359610	19360110	AT1G52060	+	443	1	19352017	19352517	AT1G52060	+	126	Yes	NA	7593	7	0.070444	700	-9.51833	1	2	0.070444	200	-1.3309	446	106	-4.16404	500	2	-5.14933	2.4e-13	5.1451	3.48e-117
2	14789975	14790475	AT2G35080	+	140	2	14787474	14787974	AT2G35080	+	460	NA	Yes	2501	22	0.070444	2200	-51.0211	0	14	0.070444	1400	-26.7665	127	482	-3.26264	800	20	NA	NA	8.65316	1.52e-09
1	30388884	30389384	AT1G80860	+	53	1	30370991	30371491	AT1G80860	+	1960	NA	Yes	17893	9	0.070444	900	-14.2712	0.174676	0	0	0	0	0	0	0	900	4	NA	NA	-3.46808	7.84e-27
1	21253441	21253941	AT1G56690	+	67	1	21234077	21234577	AT1G56690	+	1401	NA	Yes	19364	6	0.070444	600	-7.58823	1	3	0.070444	300	-2.54059	63	1250	-1.71172	300	2	-0.563988	0.0334421	NA	NA
1	21319931	21320431	AT1G57565	+	48	1	21312414	21312914	AT1G57565	+	1457	NA	Yes	7517	11	0.070444	1100	-19.4538	0.001285	5	0.070444	500	-5.78073	39	1212	-3.79492	600	6	NA	NA	NA	NA
1	22119633	22120133	AT1G60040	+	887	1	22091941	22092441	AT1G60040	+	97	Yes	NA	27692	7	0.070444	700	-9.55668	1	0	0.070444	0	1.00802	858	63	1.00802	700	2	NA	NA	1.82884	3.49e-33
1	4303044	4303544	AT1G12640	+	67	1	4299366	4299866	AT1G12640	+	684	NA	Yes	3678	12	0.070444	1200	-21.7953	0.000138	5	0.070444	500	-5.70427	69	690	-4.55578	700	8	-0.68729	0.000528025	NA	NA
1	30371030	30371530	AT1G80820	+	1960	1	30359968	30360468	AT1G80820	+	90	Yes	NA	11062	8	0.070444	800	-11.7343	1	0	0	0	0	0	0	0	800	4	-3.46808	7.84e-27	0.550308	0.0251637
1	1535462	1535962	AT1G05280	+	104	1	1529977	1530477	AT1G05280	+	2006	NA	Yes	5485	20	0.070444	2000	-45.0609	0	15	0.070444	1500	-29.9183	90	1797	-1.8288	500	16	-5.43087	5.66e-09	-5.25855	9.37e-57
2	12706609	12707109	AT2G29740	+	1669	2	12697911	12698411	AT2G29740	+	288	Yes	NA	8698	10	0.070444	1000	-16.138	0.027973	2	0.070444	200	-1.33089	1486	236	-8.43919	800	-6	-2.33506	3.71e-06	NA	NA
2	11784020	11784520	AT2G27610	+	98	2	11781990	11782490	AT2G27610	+	271	NA	Yes	2030	8	0.070444	800	-11.7136	1	6	0.070444	600	-7.56865	76	227	-0.932403	200	4	NA	NA	NA	NA
1	27779481	27779981	AT1G73870	+	244	1	27775918	27776418	AT1G73870	+	1134	NA	Yes	3563	22	0.070444	2200	-50.3183	0	15	0.070444	1500	-29.2694	216	1137	-2.58355	700	18	7.63564	1.08e-95	-3.81201	1.95e-28
1	11311506	11312006	AT1G31580	+	868	1	11288621	11289121	AT1G31580	+	110	Yes	Yes	22885	7	0.070444	700	-9.53692	1	1	0.070444	100	-0.456304	699	123	-7.51393	600	-2	6.76827	8.89e-73	NA	NA
1	19012881	19013381	AT1G51290	+	1085	1	19001988	19002488	AT1G51290	+	371	Yes	Yes	10893	12	0.070444	1200	-21.0588	0.000264	5	0.070444	500	-5.62628	1201	396	-4.3332	700	8	NA	NA	NA	NA
1	7046976	7047476	AT1G20360	+	229	1	7029002	7029502	AT1G20360	+	1996	NA	Yes	17974	16	0.070444	1600	-32.084	0	6	0.070444	600	-7.48454	186	1888	-6.78627	1000	12	NA	NA	NA	NA
1	2904075	2904575	AT1G09020	+	1385	1	2892921	2893421	AT1G09020	+	338	Yes	Yes	11154	10	0.070444	1000	-16.1188	0.028415	1	0.070444	100	-0.45766	1343	287	-13.7976	900	-6	NA	NA	-1.90517	4.82e-24
1	8024978	8025478	AT1G22680	+	79	1	8015061	8015561	AT1G22680	+	1427	NA	Yes	9917	10	0.070444	1000	-16.4942	0.021174	4	0.070444	400	-4.01271	68	1298	-4.02378	600	6	NA	NA	3.34537	1.67e-84
1	24668400	24668900	AT1G66210	+	678	1	24656556	24657056	AT1G66210	+	134	Yes	NA	11844	11	0.070444	1100	-18.7656	0.002385	3	0.070444	300	-2.53243	536	111	-7.01825	800	-6	NA	NA	-1.31897	1.3e-07
2	12509467	12509967	AT2G29110	+	111	2	12499523	12500023	AT2G29110	+	892	NA	Yes	9944	6	0.070444	600	-7.52339	1	0	0.070444	0	1.00509	99	586	1.00509	600	2	-2.08381	0.012318	5.60489	3.66e-23
2	10518090	10518590	AT2G24710	+	47	2	10515023	10515523	AT2G24710	+	419	NA	Yes	3067	12	0.070444	1200	-22.2152	9.2e-05	10	0.070444	1000	-16.5773	68	414	-0.875398	200	8	NA	NA	1.55064	0.00191342
1	24474043	24474543	AT1G65800	+	1982	1	24432497	24432997	AT1G65800	+	1560	Yes	Yes	41546	7	0.159902	308.379	-9.40362	1	4	0.127462	221.065	-3.96644	1882	1293	-0.991114	87.3143	2	3.27737	1.24e-09	-4.4499	6.89e-25
3	1186513	1187013	AT3G04460	+	53	3	1173626	1174126	AT3G04460	+	1718	NA	Yes	12887	6	0.070444	600	-7.63255	1	2	0.070444	200	-1.33098	37	1496	-3.04401	400	2	0.504824	5.5e-05	-3.16016	3.81e-12
1	24480019	24480519	AT1G65810	+	185	1	24473091	24473591	AT1G65810	+	944	NA	Yes	6928	17	0.070444	1700	-35.1218	0	5	0.070444	500	-5.64938	163	736	-9.94967	1200	-12	NA	NA	3.27737	1.24e-09
2	12322975	12323475	AT2G28710	+	1912	2	12307044	12307544	AT2G28710	+	165	Yes	Yes	15931	12	0.070444	1200	-21.2529	0.000223	8	0.070444	800	-11.6479	1881	137	-1.72568	400	8	-2.40112	2.44e-05	-5.41758	8.45e-30
1	29733030	29733530	AT1G79030	+	1064	1	29714389	29714889	AT1G79030	+	1354	Yes	Yes	18641	6	0.074505	567.291	-7.43804	1	2	0.070444	200	-1.33089	921	1220	-2.94776	367.291	2	-0.844067	3.18e-14	-3.57055	1.45e-12
3	1173573	1174073	AT3G04420	+	1718	3	1165975	1166475	AT3G04420	+	19	Yes	NA	7598	6	0.070444	600	-8.05453	1	2	0.070444	200	-1.3312	1496	20	-3.1425	400	2	-3.16016	3.81e-12	NA	NA
1	29613028	29613528	AT1G78750	+	277	1	29606001	29606501	AT1G78750	+	1148	Yes	Yes	7027	15	0.070444	1500	-29.1718	0	6	0.070444	600	-7.46689	270	1233	-5.73387	900	10	NA	NA	NA	NA
1	26270035	26270535	AT1G69792	+	94	1	26266432	26266932	AT1G69792	+	632	NA	Yes	3603	12	0.070444	1200	-21.5271	0.000176	4	0.070444	400	-4.00865	74	575	-6.19293	800	8	NA	NA	-2.57454	2.56e-11
1	17519924	17520424	AT1G47640	+	77	1	17508940	17509440	AT1G47640	+	1470	NA	Yes	10984	12	0.070444	1200	-21.6726	0.000155	1	0.070444	100	-0.452312	46	1624	-19.5037	1100	-8	-0.779128	1.45e-09	-5.87871	7.75e-12
1	5536464	5536964	AT1G16160	+	38	1	5518489	5518989	AT1G16160	+	1464	NA	Yes	17975	7	0.070444	700	-9.83019	1	4	0.070444	400	-4.02955	51	1392	-1.56893	300	2	-4.77542	4.37e-18	1.07539	0.000129305
2	10210903	10211403	AT2G24000	+	868	2	10207530	10208030	AT2G24000	+	84	Yes	NA	3373	15	0.070444	1500	-30.0013	0	6	0.070444	600	-7.61415	750	58	-6.22403	900	10	NA	NA	NA	NA
1	4806460	4806960	AT1G14030	+	1333	1	4801536	4802036	AT1G14030	+	96	Yes	NA	4924	9	0.070444	900	-14.0044	0.216962	5	0.070444	500	-5.67655	1194	97	-2.05739	400	4	3.49445	3.78e-137	-0.959675	5.24e-09
1	2350471	2350971	AT1G07630	+	62	1	2344484	2344984	AT1G07630	+	491	NA	Yes	5987	6	0.070444	600	-7.60166	1	1	0.070444	100	-0.45418	65	485	-5.71025	500	2	-0.557545	0.00129468	-1.44318	0.00126096
1	10313474	10313974	AT1G29470	+	100	1	10303104	10303604	AT1G29470	+	1645	NA	Yes	10370	21	0.070444	2100	-48.3975	0	8	0.070444	800	-11.8128	69	1368	-9.48854	1300	-18	NA	NA	6.46144	4.7e-38
2	11013919	11014419	AT2G25810	+	55	2	11000960	11001460	AT2G25810	+	1403	NA	Yes	12959	6	0.070444	600	-7.62477	1	1	0.070444	100	-0.450531	36	1460	-5.79584	500	2	-5.19573	4.23e-29	-1.73224	8.08e-12
2	15364095	15364595	AT2G36660	+	89	2	15357097	15357597	AT2G36660	+	545	NA	Yes	6998	8	0.070444	800	-11.7372	1	5	0.070444	500	-5.67725	96	408	-1.45321	300	4	NA	NA	NA	NA
1	25267954	25268454	AT1G67455	+	1053	1	25259910	25260410	AT1G67455	+	149	Yes	Yes	8044	7	0.070444	700	-9.49873	1	1	0.070444	100	-0.455603	1144	95	-7.53983	600	-2	NA	NA	-1.00395	1.7e-15
1	27563456	27563956	AT1G73310	+	57	1	27555094	27555594	AT1G73310	+	1162	NA	Yes	8362	7	0.070444	700	-9.677	1	2	0.070444	200	-1.33092	66	1055	-4.2044	500	2	-1.30329	0.000224368	-4.9589	4.17e-80
1	30139448	30139948	AT1G80120	+	109	1	30134966	30135466	AT1G80120	+	179	NA	Yes	4482	8	0.070444	800	-11.6902	1	1	0.070444	100	-0.455025	80	179	-9.59257	700	-4	-2.09602	1.11e-07	-0.598727	0.021671
1	12323990	12324490	AT1G33930	+	1455	1	12312570	12313070	AT1G33930	+	700	Yes	Yes	11420	10	0.070444	1000	-16.0622	0.029742	4	0.070444	400	-3.96819	1316	762	-3.86081	600	6	5.42303	1.01e-20	NA	NA
1	25712056	25712556	AT1G68526	+	1003	1	25707915	25708415	AT1G68526	+	280	Yes	Yes	4141	11	0.070444	1100	-18.5805	0.002786	2	0.070444	200	-1.3309	748	224	-10.107	900	-6	NA	NA	NA	NA
1	6409946	6410446	AT1G18620	+	1200	1	6398960	6399460	AT1G18620	+	88	Yes	NA	10986	6	0.070444	600	-7.54896	1	1	0.070444	100	-0.454728	1060	74	-5.69774	500	2	3.08494	2.08e-40	NA	NA
1	28248417	28248917	AT1G75260	+	211	1	28241881	28242381	AT1G75260	+	1129	NA	Yes	6536	7	0.070444	700	-9.46747	1	6	0.070444	600	-7.47327	232	1014	-0.586218	100	2	-0.93303	0.010574	6.95089	2.14e-164
3	825944	826444	AT3G03470	+	1201	3	819434	819934	AT3G03470	+	95	Yes	NA	6510	9	0.070444	900	-14.0077	0.216433	2	0.070444	200	-1.33092	1015	61	-7.08922	700	-4	1.56915	0.00412117	-2.09832	4.48e-29
1	4670428	4670928	AT1G13630	+	84	1	4665458	4665958	AT1G13630	+	476	NA	Yes	4970	10	0.070444	1000	-16.464	0.021696	1	0.070444	100	-0.454502	70	453	-14.1244	900	-6	NA	NA	NA	NA
2	9766057	9766557	AT2G22950	+	1024	2	9756006	9756506	AT2G22950	+	164	Yes	Yes	10051	11	0.070444	1100	-18.7	0.002517	6	0.070444	600	-7.49686	1045	153	-2.5283	500	6	NA	NA	-3.69129	8.36e-108
1	18041944	18042444	AT1G48780	+	53	1	18024943	18025443	AT1G48780	+	1989	NA	Yes	17001	7	0.070444	700	-9.69959	1	0	0	0	0	0	0	0	700	2	NA	NA	NA	NA
1	12158407	12158907	AT1G33520	+	810	1	12146445	12146945	AT1G33520	+	56	Yes	NA	11962	6	0.070444	600	-7.6211	1	2	0.070444	200	-1.33095	840	45	-3.02509	400	2	NA	NA	NA	NA
2	13321552	13322052	AT2G31260	+	1187	2	13306445	13306945	AT2G31260	+	80	Yes	NA	15107	7	0.070444	700	-9.59257	1	1	0.070444	100	-0.455025	1010	80	-7.56141	600	-2	-0.50624	0.000815138	NA	NA
1	24751427	24751927	AT1G66360	+	558	1	24749044	24749544	AT1G66360	+	185	Yes	NA	2383	7	0.070444	700	-9.47799	1	5	0.070444	500	-5.6537	557	147	-0.957056	200	2	NA	NA	NA	NA
2	15068430	15068930	AT2G35890	+	1353	2	15055524	15056024	AT2G35890	+	357	Yes	Yes	12906	16	0.070444	1600	-31.9117	0	5	0.070444	500	-5.63094	1212	307	-8.55074	1100	-12	-5.44029	7.67e-17	1.66835	9.23e-23
1	20439485	20439985	AT1G54780	+	693	1	20424861	20425361	AT1G54780	+	1710	Yes	Yes	14624	13	0.070444	1300	-23.575	2.4e-05	4	0.070444	400	-3.97009	527	1514	-7.05288	900	-8	6.35194	0	1.35822	7.49e-28
2	10398421	10398921	AT2G24490	+	795	2	10393448	10393948	AT2G24490	+	660	Yes	Yes	4973	17	0.070444	1700	-34.6323	0	9	0.070444	900	-13.7395	680	843	-3.85066	800	12	-0.451562	0.0206252	NA	NA
1	18783512	18784012	AT1G50700	+	77	1	18777502	18778002	AT1G50700	+	951	NA	Yes	6010	9	0.070444	900	-14.0837	0.20489	1	0.070444	100	-0.454379	68	758	-11.8178	800	-4	NA	NA	NA	NA
1	1918464	1918964	AT1G06270	+	1490	1	1913520	1914020	AT1G06270	+	62	Yes	NA	4944	19	0.070444	1900	-43.0857	0	13	0.070444	1300	-24.7797	1502	56	-2.51825	600	16	-0.465622	0.00685792	0.99407	0.000955384
2	16456861	16457361	AT2G39410	+	453	2	16452530	16453030	AT2G39410	+	174	Yes	NA	4331	7	0.070444	700	-9.4834	1	1	0.070444	100	-0.456757	403	152	-7.49732	600	-2	-3.96541	8.28e-134	2.07541	3.93e-16
1	7412951	7413451	AT1G21170	+	87	1	7399603	7400103	AT1G21170	+	1445	NA	Yes	13348	6	0.070444	600	-7.55039	1	3	0.070444	300	-2.53734	76	1211	-1.70762	300	2	NA	NA	2.36096	2.33e-07
1	154471	154971	AT1G01420	+	145	1	149547	150047	AT1G01420	+	1517	NA	Yes	4924	23	0.070444	2300	-54.2579	0	16	0.070444	1600	-33.0553	79	1207	-2.72255	700	20	0.78716	0.000198684	3.52792	4.78e-20
1	17601012	17601512	AT1G47790	+	868	1	17590907	17591407	AT1G47790	+	588	Yes	Yes	10105	11	0.070444	1100	-18.4937	0.003	2	0.070444	200	-1.33089	759	699	-10.0175	900	-6	NA	NA	NA	NA
1	22490667	22491167	AT1G61065	+	918	1	22485115	22485615	AT1G61065	+	165	Yes	NA	5552	12	0.070444	1200	-21.2529	0.000223	4	0.070444	400	-3.99015	966	125	-6.05194	800	8	0.637284	0.0280062	NA	NA
1	4847404	4847904	AT1G14180	+	1470	1	4841152	4841652	AT1G14180	+	89	Yes	NA	6252	7	0.070444	700	-9.57181	1	6	0.070444	600	-7.61086	1423	59	-0.574498	100	2	0.701289	3.24e-05	-5.78404	8.46e-74
2	15159994	15160494	AT2G36100	+	1184	2	15144129	15144629	AT2G36100	+	171	Yes	NA	15865	7	0.070444	700	-9.485	1	6	0.070444	600	-7.52518	1370	109	-0.581817	100	2	-5.06795	1.96e-23	NA	NA
1	18202118	18202618	AT1G49210	+	1469	1	18178527	18179027	AT1G49210	+	192	Yes	NA	23591	6	0.070444	600	-7.48276	1	1	0.070444	100	-0.456515	1404	135	-5.65761	500	2	NA	NA	NA	NA
2	12707443	12707943	AT2G29740	+	479	2	12699461	12699961	AT2G29740	+	798	Yes	NA	7982	6	0.070444	600	-7.44997	1	3	0.070444	300	-2.52412	533	795	-1.6914	300	2	-2.33506	3.71e-06	-2.42354	1.12e-07
2	7970078	7970578	AT2G18340	+	1155	2	7954871	7955371	AT2G18340	+	45	Yes	NA	15207	6	0.070444	600	-7.67099	1	1	0.070444	100	-0.453156	967	53	-5.73382	500	2	NA	NA	NA	NA
1	26993588	26994088	AT1G71770	+	859	1	26967484	26967984	AT1G71770	+	719	Yes	Yes	26104	6	0.070444	600	-7.44272	1	1	0.070444	100	-0.458243	726	674	-5.61968	500	2	NA	NA	-0.547997	0.00389807
1	20080583	20081083	AT1G53790	+	1662	1	20069992	20070492	AT1G53790	+	68	Yes	NA	10591	7	0.070444	700	-9.62918	1	5	0.070444	500	-5.71888	1570	60	-0.957299	200	2	-1.7157	1.37e-21	-0.523134	8.15e-05
1	1730530	1731030	AT1G05785	+	1262	1	1706963	1707463	AT1G05785	+	1448	Yes	Yes	23567	8	0.094505	596.316	-11.5053	1	1	0.092057	76.5216	-0.458451	1354	1298	-9.40562	519.795	-4	-0.88673	0.00378558	0.795441	0.00994381
1	25891444	25891944	AT1G68872	+	102	1	25884539	25885039	AT1G68872	+	764	NA	Yes	6905	8	0.070444	800	-11.7045	1	5	0.070444	500	-5.67797	95	714	-1.4534	300	4	-1.0367	9.87e-08	-5.38412	9.03e-35
1	11310977	11311477	AT1G31580	+	707	1	11297031	11297531	AT1G31580	+	1669	Yes	Yes	13946	26	0.070444	2600	-62.6546	0	6	0.070444	600	-7.44616	581	1452	-19.2556	2000	-24	6.76827	8.89e-73	5.31861	9.65e-33
1	19013073	19013573	AT1G51290	+	1085	1	19004558	19005058	AT1G51290	+	1645	Yes	Yes	8515	23	0.092304	1755.28	-52.7791	0	12	0.107007	789.971	-20.954	1201	1701	-7.66681	965.311	-20	NA	NA	-6.07622	3.03e-09
1	2904047	2904547	AT1G09020	+	1385	1	2899021	2899521	AT1G09020	+	104	Yes	NA	5026	21	0.070444	2100	-48.3116	0	10	0.070444	1000	-16.4816	1343	81	-6.38079	1100	18	NA	NA	0.604501	8.87e-17
1	9594628	9595128	AT1G27595	+	25	1	9590699	9591199	AT1G27595	+	711	NA	Yes	3929	7	0.070444	700	-10.0871	1	3	0.070444	300	-2.58067	21	574	-2.68574	400	2	NA	NA	NA	NA
1	3061000	3061500	AT1G09483	+	1714	1	3041952	3042452	AT1G09483	+	114	Yes	NA	19048	8	0.070444	800	-11.681	1	7	0.070444	700	-9.5343	1637	112	-0.588578	100	4	NA	NA	NA	NA
2	14868943	14869443	AT2G35330	+	68	2	14857138	14857638	AT2G35330	+	1211	NA	Yes	11805	8	0.070444	800	-11.8178	1	3	0.070444	300	-2.54891	44	1215	-3.56515	500	4	NA	NA	-5.64719	7.84e-34
1	27180429	27180929	AT1G72210	+	625	1	27170556	27171056	AT1G72210	+	1276	Yes	Yes	9873	20	0.070444	2000	-43.5644	0	11	0.070444	1100	-18.4925	597	1141	-4.089	900	16	-1.61416	0.000493856	-3.78158	4.72e-29
1	7421568	7422068	AT1G21200	+	100	1	7399621	7400121	AT1G21200	+	1445	NA	Yes	21947	7	0.070444	700	-9.55165	1	1	0.070444	100	-0.455728	99	1211	-7.53521	600	-2	-0.921962	7.75e-09	2.36096	2.33e-07
2	16504471	16504971	AT2G39560	+	171	2	16501412	16501912	AT2G39560	+	1421	NA	Yes	3059	15	0.070444	1500	-29.3876	0	6	0.070444	600	-7.4922	164	1300	-5.81208	900	10	1.26184	6.48e-05	-0.564106	1.11e-09
2	9173503	9174003	AT2G21440	+	50	2	9159070	9159570	AT2G21440	+	950	NA	Yes	14433	6	0.070444	600	-7.64545	1	1	0.070444	100	-0.449205	31	1017	-5.82799	500	2	NA	NA	-3.25923	1.74e-05
2	14760961	14761461	AT2G35030	+	56	2	14750445	14750945	AT2G35030	+	1872	NA	Yes	10516	7	0.070444	700	-9.68233	1	0	0	0	0	0	0	0	700	2	NA	NA	NA	NA
1	9934460	9934960	AT1G28330	+	97	1	9931556	9932056	AT1G28330	+	773	NA	Yes	2904	11	0.070444	1100	-18.9051	0.002132	5	0.070444	500	-5.66857	110	992	-3.55715	600	6	-1.17694	0.000427855	NA	NA
1	21182330	21182830	AT1G56540	+	797	1	21174472	21174972	AT1G56540	+	96	Yes	Yes	7858	7	0.070444	700	-9.55843	1	2	0.070444	200	-1.33091	718	99	-4.16867	500	2	0.944678	1.14e-05	6.81212	1.85e-72
1	21718154	21718654	AT1G58450	+	1160	1	21714043	21714543	AT1G58450	+	78	Yes	Yes	4111	6	0.070444	600	-7.56493	1	1	0.070444	100	-0.454883	879	77	-5.69424	500	2	NA	NA	NA	NA
1	20173515	20174015	AT1G54040	+	848	1	20162508	20163008	AT1G54040	+	800	Yes	Yes	11007	12	0.070444	1200	-20.9773	0.000283	5	0.070444	500	-5.61823	798	884	-4.31162	700	8	6.73511	1.24e-31	NA	NA
1	4114466	4114966	AT1G12120	+	94	1	4095148	4095648	AT1G12120	+	1240	NA	Yes	19318	6	0.070444	600	-7.54105	1	2	0.070444	200	-1.33091	94	1140	-2.98157	400	2	NA	NA	1.98068	0.0117095
1	27650666	27651166	AT1G73570	+	970	1	27640026	27640526	AT1G73570	+	72	Yes	NA	10640	6	0.070444	600	-7.57672	1	2	0.070444	200	-1.33092	866	66	-2.99819	400	2	1.46631	4.72e-09	NA	NA
2	18778029	18778529	AT2G45560	+	1251	2	18772459	18772959	AT2G45560	+	195	Yes	NA	5570	21	0.070444	2100	-47.35	0	9	0.070444	900	-13.8602	1120	178	-7.20546	1200	-18	2.6254	1.19e-57	NA	NA
1	4806452	4806952	AT1G14030	+	1333	1	4803480	4803980	AT1G14030	+	138	Yes	NA	2972	39	0.070444	3900	-113.286	0	29	0.070444	2900	-76.2763	1194	104	-3.38253	1000	44	3.49445	3.78e-137	-0.316098	0.00373933
1	24033437	24033937	AT1G64670	+	1404	1	23999463	23999963	AT1G64670	+	117	Yes	NA	33974	6	0.070444	600	-7.51841	1	0	0.070444	0	1.00433	1090	116	1.00433	600	2	2.82935	2.17e-10	-0.434144	0.0250098
2	10757614	10758114	AT2G25260	+	791	2	10753942	10754442	AT2G25260	+	100	Yes	NA	3672	10	0.070444	1000	-16.3884	0.023032	4	0.070444	400	-4.00522	732	80	-3.99524	600	6	-5.18142	7.21e-105	NA	NA
1	26911931	26912431	AT1G71400	+	179	1	26898586	26899086	AT1G71400	+	677	NA	Yes	13345	7	0.070444	700	-9.48086	1	2	0.070444	200	-1.3309	170	641	-4.1397	500	2	-3.09908	1.23e-39	NA	NA
1	25267992	25268492	AT1G67455	+	1053	1	25262464	25262964	AT1G67455	+	139	Yes	NA	5528	8	0.070444	800	-11.6456	1	3	0.070444	300	-2.53109	1144	127	-3.45098	500	4	NA	NA	NA	NA
2	16709948	16710448	AT2G40010	+	77	2	16699841	16700341	AT2G40010	+	382	NA	Yes	10107	9	0.070444	900	-14.0837	0.20489	5	0.070444	500	-5.691	80	309	-2.06715	400	4	NA	NA	NA	NA
1	25711513	25712013	AT1G68526	+	814	1	25709000	25709500	AT1G68526	+	251	Yes	Yes	2513	9	0.070444	900	-13.8122	0.248058	3	0.070444	300	-2.52774	620	200	-4.48649	600	4	NA	NA	5.94517	1.77e-46
1	12323573	12324073	AT1G33930	+	669	1	12314966	12315466	AT1G33930	+	643	Yes	Yes	8607	12	0.070444	1200	-20.9944	0.000279	3	0.070444	300	-2.52381	624	717	-8.18464	900	-8	5.42303	1.01e-20	NA	NA
1	24980950	24981450	AT1G66950	+	77	1	24973920	24974420	AT1G66950	+	1797	NA	Yes	7030	7	0.070444	700	-9.60061	1	2	0.070444	200	-1.33091	101	1354	-4.16728	500	2	-5.02397	7.42e-14	8.30084	2.68e-136
1	28248421	28248921	AT1G75260	+	211	1	28244419	28244919	AT1G75260	+	577	NA	Yes	4002	18	0.070444	1800	-38.0089	0	9	0.070444	900	-13.8217	232	579	-4.64055	900	14	-0.93303	0.010574	2.95927	8.55e-06
2	8020483	8020983	AT2G18490	+	1010	2	8003969	8004469	AT2G18490	+	76	Yes	NA	16514	6	0.070444	600	-7.56865	1	5	0.070444	500	-5.71025	1037	65	-0.568175	100	2	NA	NA	NA	NA
1	24839073	24839573	AT1G66580	+	110	1	24824498	24824998	AT1G66580	+	1736	NA	Yes	14575	7	0.070444	700	-9.53692	1	3	0.070444	300	-2.53552	86	1647	-2.52168	400	2	-0.761589	5.36e-12	NA	NA
2	9769465	9769965	AT2G22950	+	179	2	9760442	9760942	AT2G22950	+	1232	Yes	NA	9023	10	0.070444	1000	-16.2177	0.026234	3	0.070444	300	-2.52786	196	1156	-5.65548	700	6	NA	NA	-3.61951	6.4e-09
1	12158085	12158585	AT1G33520	+	1584	1	12150026	12150526	AT1G33520	+	40	Yes	NA	8059	6	0.070444	600	-7.70335	1	2	0.070444	200	-1.3311	1343	24	-3.10515	400	2	NA	NA	0.45456	0.0158424
1	624454	624954	AT1G02820	+	1043	1	618900	619400	AT1G02820	+	1142	Yes	Yes	5554	16	0.070444	1600	-31.7131	0	3	0.070444	300	-2.52342	790	1076	-14.3012	1300	-12	5.12934	1.1e-26	-4.97036	7.55e-36
2	13326979	13327479	AT2G31260	+	912	2	13318960	13319460	AT2G31260	+	170	Yes	NA	8019	19	0.070444	1900	-41.2296	0	8	0.070444	800	-11.6318	767	152	-6.78108	1100	16	-0.50624	0.000815138	-0.386984	0.020495
2	17767465	17767965	AT2G42660	+	1541	2	17759465	17759965	AT2G42660	+	58	Yes	NA	8000	6	0.070444	600	-7.61415	1	1	0.070444	100	-0.451702	1438	42	-5.76791	500	2	-4.91572	1.49e-13	NA	NA
1	30049941	30050441	AT1G79890	+	22	1	30043577	30044077	AT1G79890	+	1213	NA	Yes	6364	6	0.070444	600	-7.95778	1	2	0.070444	200	-1.33102	31	1214	-3.06524	400	2	NA	NA	-4.80709	6.19e-11
1	22962003	22962503	AT1G62130	+	75	1	22950010	22950510	AT1G62130	+	1620	NA	Yes	11993	7	0.070444	700	-9.60634	1	3	0.070444	300	-2.54	65	1519	-2.53666	400	2	NA	NA	NA	NA
2	13410364	13410864	AT2G31480	+	1391	2	13395012	13395512	AT2G31480	+	64	Yes	NA	15352	6	0.070444	600	-7.59602	1	1	0.070444	100	-0.453883	1490	61	-5.71704	500	2	NA	NA	NA	NA
1	20748847	20749347	AT1G55550	+	532	1	20744542	20745042	AT1G55550	+	80	Yes	NA	4305	7	0.070444	700	-9.59257	1	2	0.070444	200	-1.33091	454	75	-4.1914	500	2	1.23133	1.56e-07	NA	NA
1	1168042	1168542	AT1G04360	+	1140	1	1161506	1162006	AT1G04360	+	884	Yes	Yes	6536	13	0.070444	1300	-23.554	2.4e-05	4	0.070444	400	-3.96825	814	751	-7.03587	900	-8	-1.35568	9.97e-05	-2.63126	1.56e-06
1	26457104	26457604	AT1G70260	+	48	1	26424029	26424529	AT1G70260	+	1288	NA	Yes	33075	6	0.070444	600	-7.65499	1	2	0.070444	200	-1.33093	57	1202	-3.00717	400	2	NA	NA	-6.18539	4.27e-28
1	624402	624902	AT1G02820	+	1043	1	621957	622457	AT1G02820	+	1013	Yes	Yes	2445	64	0.070444	6400	-208.124	0	44	0.070444	4400	-127.461	790	940	-5.75426	2000	80	5.12934	1.1e-26	NA	NA
1	2888510	2889010	AT1G08990	+	1794	1	2878598	2879098	AT1G08990	+	73	Yes	NA	9912	7	0.070444	700	-9.61241	1	3	0.070444	300	-2.54378	1643	54	-2.54949	400	2	-5.64644	2.23e-50	-1.544	7.51e-09
1	20439525	20440025	AT1G54780	+	693	1	20431007	20431507	AT1G54780	+	1046	Yes	Yes	8518	9	0.070444	900	-13.7387	0.262389	5	0.070444	500	-5.6223	527	832	-2.02212	400	4	6.35194	0	1.23497	9.59e-07
2	10399982	10400482	AT2G24490	+	1512	2	10394534	10395034	AT2G24490	+	1000	Yes	Yes	5448	39	0.078195	3513.4	-108.32	0	28	0.081067	2433.07	-69.1676	1366	1133	-4.0325	1080.33	42	-0.451562	0.0206252	NA	NA
2	15068929	15069429	AT2G35890	+	1430	2	15058932	15059432	AT2G35890	+	117	Yes	NA	9997	11	0.070444	1100	-18.8184	0.002287	7	0.070444	700	-9.52251	1571	122	-1.81138	400	6	-5.44029	7.67e-17	NA	NA
1	18781505	18782005	AT1G50700	+	305	1	18779386	18779886	AT1G50700	+	311	NA	Yes	2119	11	0.070444	1100	-18.5668	0.002819	2	0.070444	200	-1.3309	203	249	-10.1209	900	-6	NA	NA	NA	NA
2	17374493	17374993	AT2G41670	+	120	2	17367497	17367997	AT2G41670	+	1352	NA	Yes	6996	16	0.070444	1600	-32.5356	0	2	0.070444	200	-1.33091	99	1155	-20.2194	1400	-12	NA	NA	-5.10929	1.61e-42
1	23392406	23392906	AT1G63090	+	164	1	23384505	23385005	AT1G63090	+	1266	NA	Yes	7901	8	0.070444	800	-11.6211	1	3	0.070444	300	-2.53074	132	1332	-3.44883	500	4	1.05067	0.000348372	NA	NA
1	1919477	1919977	AT1G06270	+	1015	1	1915504	1916004	AT1G06270	+	92	Yes	NA	3973	18	0.070444	1800	-38.9404	0	6	0.070444	600	-7.56315	794	79	-9.47487	1200	-14	-0.465622	0.00685792	1.12676	0.000226673
2	18713047	18713547	AT2G45410	+	94	2	18705446	18705946	AT2G45410	+	716	NA	Yes	7601	6	0.070444	600	-7.54105	1	3	0.070444	300	-2.53476	91	651	-1.7044	300	2	NA	NA	-0.55381	0.0209628
1	19273598	19274098	AT1G51880	+	165	1	19250445	19250945	AT1G51880	+	1758	NA	Yes	23153	11	0.070444	1100	-18.6982	0.002521	2	0.070444	200	-1.3309	183	1569	-10.1371	900	-6	-5.75359	8.01e-38	-4.47906	4.11e-81
1	17600483	17600983	AT1G47790	+	776	1	17595018	17595518	AT1G47790	+	1171	Yes	Yes	5465	21	0.070444	2100	-46.5815	0	6	0.070444	600	-7.44428	649	1056	-12.317	1500	-18	NA	NA	NA	NA
1	4172351	4172851	AT1G12270	+	76	1	4159955	4160455	AT1G12270	+	1719	NA	Yes	12396	13	0.070444	1300	-24.4128	1.1e-05	1	0.070444	100	-0.454036	63	1405	-21.8562	1200	-8	NA	NA	3.99687	5.32e-63
1	4847073	4847573	AT1G14180	+	848	1	4845431	4845931	AT1G14180	+	128	Yes	NA	1642	13	0.070444	1300	-24.0179	1.6e-05	4	0.070444	400	-3.99324	760	112	-7.27498	900	-8	0.701289	3.24e-05	-1.68784	2.21e-08
1	22371559	22372059	AT1G60780	+	1946	1	22360917	22361417	AT1G60780	+	52	Yes	NA	10642	8	0.070444	800	-11.9259	1	5	0.070444	500	-5.72915	1691	55	-1.4672	300	4	NA	NA	-4.98257	5.66e-22
1	17600011	17600511	AT1G47790	+	722	1	17598094	17598594	AT1G47790	+	570	Yes	Yes	1917	19	0.070444	1900	-40.5612	0	7	0.070444	700	-9.42839	765	446	-8.05687	1200	-14	NA	NA	NA	NA
2	7980567	7981067	AT2G18370	+	1936	2	7939938	7940438	AT2G18370	+	1856	Yes	Yes	40629	6	0.185828	227.448	-7.43389	1	2	0.149857	94.0146	-1.33089	1677	1706	-1.94653	133.434	2	-5.14697	5.81e-38	NA	NA
2	12706558	12707058	AT2G29740	+	1669	2	12701954	12702454	AT2G29740	+	209	Yes	NA	4604	14	0.070444	1400	-26.5073	1e-06	4	0.070444	400	-3.97887	1486	218	-8.38088	1000	-10	-2.33506	3.71e-06	0.609529	0.014931
2	16011909	16012409	AT2G38230	+	49	2	15997407	15997907	AT2G38230	+	1734	NA	Yes	14502	6	0.070444	600	-7.65012	1	5	0.070444	500	-5.71353	63	1725	-0.567762	100	2	4.23931	1.92e-130	NA	NA
2	12605989	12606489	AT2G29370	+	95	2	12592542	12593042	AT2G29370	+	1553	NA	Yes	13447	10	0.070444	1000	-16.4092	0.02266	4	0.070444	400	-4.00013	91	1211	-3.97609	600	6	NA	NA	0.990224	0.000675469
1	25342142	25342642	AT1G67623	+	1146	1	25333495	25333995	AT1G67623	+	64	Yes	NA	8647	7	0.070444	700	-9.64458	1	2	0.070444	200	-1.33093	1049	60	-4.21534	500	2	NA	NA	1.11672	0.0010792
1	20080907	20081407	AT1G53790	+	1366	1	20072581	20073081	AT1G53790	+	86	Yes	NA	8326	10	0.070444	1000	-16.4529	0.021891	3	0.070444	300	-2.53585	1210	84	-5.77344	700	6	-1.7157	1.37e-21	-0.452178	0.00685012
2	12697972	12698472	AT2G29700	+	288	2	12693972	12694472	AT2G29700	+	1645	NA	Yes	4000	27	0.070444	2700	-66.6903	0	14	0.070444	1400	-26.4623	236	1451	-6.27493	1300	26	NA	NA	1.05712	1.31e-07
1	19012466	19012966	AT1G51290	+	1701	1	19008458	19008958	AT1G51290	+	1149	Yes	Yes	4008	49	0.101077	3414.97	-146.542	0	30	0.128629	1642.95	-75.9333	1845	1331	-12.8967	1772.02	-56	NA	NA	-3.19419	4.15e-56
2	13261389	13261889	AT2G31110	+	627	2	13257072	13257572	AT2G31110	+	112	Yes	NA	4317	7	0.070444	700	-9.5343	1	4	0.070444	400	-3.99682	375	100	-1.55294	300	2	NA	NA	NA	NA
1	25615319	25615819	AT1G68340	+	1255	1	25603975	25604475	AT1G68340	+	146	Yes	NA	11344	13	0.070444	1300	-23.949	1.7e-05	5	0.070444	500	-5.66751	1068	112	-5.42734	800	8	-0.426438	0.0290676	NA	NA
2	7969121	7969621	AT2G18340	+	1536	2	7964608	7965108	AT2G18340	+	91	Yes	NA	4513	6	0.070444	600	-7.54487	1	3	0.070444	300	-2.54	1298	65	-1.71098	300	2	NA	NA	7.45824	1.02e-45
1	2436483	2436983	AT1G07885	+	100	1	2434575	2435075	AT1G07885	+	432	NA	Yes	1908	14	0.070444	1400	-26.9501	1e-06	6	0.070444	600	-7.53864	96	547	-4.99048	800	10	NA	NA	NA	NA
2	15124602	15125102	AT2G36020	+	1270	2	15110418	15110918	AT2G36020	+	1285	Yes	NA	14184	7	0.084398	584.26	-9.40588	1	4	0.072786	387.127	-3.96678	1139	1220	-0.991114	197.132	2	NA	NA	NA	NA
2	18225520	18226020	AT2G44050	+	121	2	18219345	18219845	AT2G44050	+	1278	NA	Yes	6175	20	0.070444	2000	-44.7951	0	9	0.070444	900	-14.0111	94	1026	-6.60897	1100	16	0.945781	2.4e-19	NA	NA
2	16710027	16710527	AT2G40010	+	77	2	16704623	16705123	AT2G40010	+	1711	NA	Yes	5404	13	0.070444	1300	-24.3998	1.1e-05	11	0.070444	1100	-19.0149	80	1460	-0.866274	200	8	NA	NA	NA	NA
2	11447932	11448432	AT2G26840	+	741	2	11442011	11442511	AT2G26840	+	79	Yes	NA	5921	9	0.070444	900	-14.0735	0.206454	7	0.070444	700	-9.58513	859	83	-0.913321	200	4	1.38853	3.64e-08	-4.37831	1.03e-14
1	983081	983581	AT1G03870	+	1968	1	909439	909939	AT1G03870	+	132	Yes	NA	73642	6	0.070444	600	-7.50798	1	2	0.070444	200	-1.3309	1482	120	-2.97325	400	2	NA	NA	NA	NA
2	15005627	15006127	AT2G35700	+	1049	2	14998436	14998936	AT2G35700	+	89	Yes	NA	7191	7	0.070444	700	-9.57181	1	2	0.070444	200	-1.33092	934	72	-4.19536	500	2	3.80378	6.29e-11	-0.329939	0.000196106
2	18959618	18960118	AT2G46140	+	1048	2	18951982	18952482	AT2G46140	+	87	Yes	NA	7636	8	0.070444	800	-11.7431	1	2	0.070444	200	-1.33092	878	73	-5.5487	600	4	-3.67556	7.51e-22	1.26699	5.28e-20
1	23410024	23410524	AT1G63120	+	92	1	23384575	23385075	AT1G63120	+	1266	NA	Yes	25449	6	0.070444	600	-7.54357	1	3	0.070444	300	-2.53919	68	1332	-1.70995	300	2	NA	NA	NA	NA
1	19401584	19402084	AT1G52130	+	108	1	19385117	19385617	AT1G52130	+	1725	NA	Yes	16467	10	0.070444	1000	-16.3593	0.023544	5	0.070444	500	-5.67387	101	1450	-2.7624	500	6	NA	NA	4.28722	1.46e-17
1	28681606	28682106	AT1G76430	+	2009	1	28654568	28655068	AT1G76430	+	68	Yes	NA	27038	7	0.070444	700	-9.62918	1	0	0	0	0	0	0	0	700	2	-5.09158	2.03e-24	NA	NA
2	17395844	17396344	AT2G41700	+	1714	2	17374048	17374548	AT2G41700	+	160	Yes	NA	21796	10	0.070444	1000	-16.2429	0.025727	6	0.070444	600	-7.50617	1466	135	-1.9104	400	6	-0.20774	0.00727362	NA	NA
1	29487163	29487663	AT1G78380	+	1239	1	29473501	29474001	AT1G78380	+	75	Yes	NA	13662	13	0.070444	1300	-24.4261	1.1e-05	8	0.070444	800	-11.6981	1056	105	-2.27014	500	8	-0.608156	0.00376162	-5.42449	5.82e-31
1	21181915	21182415	AT1G56540	+	553	1	21179516	21180016	AT1G56540	+	142	Yes	Yes	2399	6	0.070444	600	-7.50227	1	1	0.070444	100	-0.456578	601	139	-5.65623	500	2	0.944678	1.14e-05	NA	NA
1	5823454	5823954	AT1G17030	+	108	1	5807114	5807614	AT1G17030	+	1318	NA	Yes	16340	10	0.070444	1000	-16.3593	0.023544	3	0.070444	300	-2.53919	68	1338	-5.82438	700	6	-1.59567	5.67e-05	NA	NA
2	18087995	18088495	AT2G43610	+	135	2	18081629	18082129	AT2G43610	+	952	NA	Yes	6366	15	0.070444	1500	-29.5413	0	5	0.070444	500	-5.65833	133	634	-7.56924	1000	-10	-5.15005	3.36e-35	-2.25113	1.41e-11
1	1803448	1803948	AT1G05940	+	2010	1	1788087	1788587	AT1G05940	+	144	Yes	NA	15361	6	0.070444	600	-7.50122	1	2	0.070444	200	-1.3309	1763	120	-2.97325	400	2	NA	NA	1.16661	1.48e-08
2	9158978	9159478	AT2G21400	+	950	2	9142555	9143055	AT2G21400	+	40	Yes	NA	16423	6	0.070444	600	-7.70335	1	1	0.070444	100	-0.447788	1017	27	-5.86305	500	2	-3.25923	1.74e-05	1.47615	3.39e-10
1	20173504	20174004	AT1G54040	+	848	1	20168470	20168970	AT1G54040	+	146	Yes	NA	5034	13	0.070444	1300	-23.949	1.7e-05	9	0.070444	900	-13.9411	798	120	-1.66455	400	8	6.73511	1.24e-31	-1.06839	3.99e-09
1	4868928	4869428	AT1G14250	+	1186	1	4857931	4858431	AT1G14250	+	86	Yes	NA	10997	6	0.070444	600	-7.55185	1	2	0.070444	200	-1.33091	948	94	-2.98157	400	2	7.67331	7.83e-50	-1.41632	3.51e-06
1	27651892	27652392	AT1G73570	+	1678	1	27642498	27642998	AT1G73570	+	159	Yes	NA	9394	11	0.070444	1100	-18.7092	0.002498	2	0.070444	200	-1.3309	1433	118	-10.2293	900	-6	1.46631	4.72e-09	4.48933	0.000237868
1	26923960	26924460	AT1G71440	+	160	1	26916552	26917052	AT1G71440	+	1318	NA	Yes	7408	6	0.070444	600	-7.49382	1	3	0.070444	300	-2.53006	143	1071	-1.6986	300	2	0.241508	0.0201471	-0.340964	0.0466744
1	5537978	5538478	AT1G16160	+	59	1	5526128	5526628	AT1G16160	+	911	NA	Yes	11850	8	0.070444	800	-11.871	1	3	0.070444	300	-2.54607	49	865	-3.54635	500	4	-4.77542	4.37e-18	NA	NA
1	4856935	4857435	AT1G14210	+	129	1	4847511	4848011	AT1G14210	+	1470	NA	Yes	9424	9	0.070444	900	-13.9237	0.229079	6	0.070444	600	-7.53199	102	1423	-1.37935	300	4	-1.41632	3.51e-06	0.701289	3.24e-05
1	1560512	1561012	AT1G05350	+	102	1	1553468	1553968	AT1G05350	+	728	NA	Yes	7044	6	0.070444	600	-7.53199	1	3	0.070444	300	-2.5409	62	654	-1.71212	300	2	NA	NA	NA	NA
2	12614968	12615468	AT2G29400	+	237	2	12592573	12593073	AT2G29400	+	1553	NA	Yes	22395	6	0.070444	600	-7.47232	1	1	0.070444	100	-0.457339	218	1211	-5.63943	500	2	-0.53304	0.00126089	0.990224	0.000675469
2	9158499	9158999	AT2G21400	+	1311	2	9149990	9150490	AT2G21400	+	64	Yes	NA	8509	9	0.070444	900	-14.1668	0.191578	1	0.070444	100	-0.45372	1173	59	-11.871	800	-4	-3.25923	1.74e-05	3.27116	7.83e-155
2	17909351	17909851	AT2G43060	+	953	2	17903907	17904407	AT2G43060	+	43	Yes	NA	5444	10	0.070444	1000	-16.9408	0.013991	3	0.070444	300	-2.55024	1003	42	-6.0006	700	6	NA	NA	NA	NA
1	19026105	19026605	AT1G51320	+	1978	1	19007978	19008478	AT1G51320	+	1127	Yes	Yes	18127	11	0.115286	672.136	-18.4564	0.003093	8	0.118825	474.268	-11.5047	1737	1306	-1.69552	197.868	6	NA	NA	-3.19419	4.15e-56
1	7901894	7902394	AT1G22380	+	1977	1	7878457	7878957	AT1G22380	+	79	Yes	NA	23437	8	0.070444	800	-11.77	1	4	0.070444	400	-4.02242	1742	57	-2.27298	400	4	NA	NA	-0.728119	4.14e-17
1	12323557	12324057	AT1G33930	+	669	1	12319930	12320430	AT1G33930	+	1029	Yes	Yes	3627	23	0.070444	2300	-52.9145	0	12	0.070444	1200	-20.9971	624	957	-5.18602	1100	20	5.42303	1.01e-20	NA	NA
1	20851024	20851524	AT1G55770	+	129	1	20833993	20834493	AT1G55770	+	1472	NA	Yes	17031	6	0.070444	600	-7.50987	1	1	0.070444	100	-0.455468	91	1187	-5.68102	500	2	NA	NA	-1.48068	7.14e-25
1	4857030	4857530	AT1G14210	+	129	1	4850029	4850529	AT1G14210	+	880	NA	Yes	7001	7	0.070444	700	-9.51537	1	1	0.070444	100	-0.455815	102	807	-7.53199	600	-2	-1.41632	3.51e-06	-3.08516	1.45e-36
1	3159350	3159850	AT1G09760	+	46	1	3157397	3157897	AT1G09760	+	1157	NA	Yes	1953	10	0.070444	1000	-16.8743	0.014927	3	0.070444	300	-2.55422	37	712	-6.06713	700	6	NA	NA	4.68049	3.07e-215
2	5929478	5929978	AT2G14080	+	54	2	5909521	5910021	AT2G14080	+	1641	NA	Yes	19957	6	0.070444	600	-7.62858	1	1	0.070444	100	-0.450752	37	1546	-5.79051	500	2	4.35706	6.59e-183	0.548551	0.000711713
1	12169452	12169952	AT1G33560	+	84	1	12158063	12158563	AT1G33560	+	1584	NA	Yes	11389	7	0.070444	700	-9.58277	1	3	0.070444	300	-2.53674	79	1343	-2.52574	400	2	-0.96305	8.43e-05	NA	NA
1	4050456	4050956	AT1G12000	+	123	1	4045631	4046131	AT1G12000	+	1428	NA	Yes	4825	16	0.070444	1600	-32.5119	0	10	0.070444	1000	-16.3315	117	1576	-2.6008	600	12	-1.03589	1.29e-07	NA	NA
1	11255085	11255585	AT1G31430	+	91	1	11250002	11250502	AT1G31430	+	1658	NA	Yes	5083	16	0.070444	1600	-32.8512	0	10	0.070444	1000	-16.695	57	1290	-2.75321	600	12	NA	NA	1.0621	1.85e-17
1	12325401	12325901	AT1G33930	+	103	1	12322185	12322685	AT1G33930	+	770	Yes	Yes	3216	6	0.070444	600	-7.53096	1	3	0.070444	300	-2.53521	88	734	-1.70496	300	2	5.42303	1.01e-20	NA	NA
1	24838978	24839478	AT1G66580	+	110	1	24828467	24828967	AT1G66580	+	1563	NA	Yes	10511	11	0.070444	1100	-18.845	0.002239	7	0.070444	700	-9.57823	86	1431	-1.82807	400	6	-0.761589	5.36e-12	NA	NA
2	13410498	13410998	AT2G31480	+	1391	2	13397484	13397984	AT2G31480	+	97	Yes	NA	13014	8	0.070444	800	-11.716	1	2	0.070444	200	-1.3309	1490	103	-5.50276	600	4	NA	NA	NA	NA
1	12158070	12158570	AT1G33520	+	1584	1	12151487	12151987	AT1G33520	+	34	Yes	NA	6583	7	0.070444	700	-9.88631	1	4	0.070444	400	-4.06117	1343	35	-1.58522	300	2	NA	NA	0.364492	0.0129426
1	20020401	20020901	AT1G53640	+	47	1	20019398	20019898	AT1G53640	+	416	NA	Yes	1003	8	0.070444	800	-11.9759	1	4	0.070444	400	-4.02955	51	371	-2.28226	400	4	-5.65486	6.14e-15	-5.83156	2.04e-17
1	18913453	18913953	AT1G51020	+	1092	1	18903046	18903546	AT1G51020	+	1050	Yes	Yes	10407	9	0.070444	900	-13.7247	0.265082	4	0.070444	400	-3.96764	1086	875	-2.98134	500	4	NA	NA	NA	NA
2	9766832	9767332	AT2G22950	+	418	2	9763559	9764059	AT2G22950	+	211	Yes	Yes	3273	10	0.070444	1000	-16.1856	0.02691	3	0.070444	300	-2.52557	437	319	-5.6228	700	6	NA	NA	NA	NA
2	15068960	15069460	AT2G35890	+	1430	2	15061929	15062429	AT2G35890	+	132	Yes	NA	7031	9	0.070444	900	-13.9184	0.229862	5	0.070444	500	-5.67797	1571	95	-2.05835	400	4	-5.44029	7.67e-17	NA	NA
1	7822942	7823442	AT1G22160	+	148	1	7813886	7814386	AT1G22160	+	1389	NA	Yes	9056	14	0.070444	1400	-26.6718	1e-06	3	0.070444	300	-2.53243	111	1309	-11.4739	1100	-10	NA	NA	NA	NA
1	1168155	1168655	AT1G04360	+	1140	1	1162905	1163405	AT1G04360	+	242	Yes	NA	5250	11	0.070444	1100	-18.6068	0.002723	4	0.070444	400	-3.97733	814	243	-4.88046	700	6	-1.35568	9.97e-05	-0.725121	2.9e-14
2	5694570	5695070	AT2G13680	+	922	2	5690426	5690926	AT2G13680	+	62	Yes	NA	4144	11	0.070444	1100	-19.2018	0.001638	3	0.070444	300	-2.5525	999	39	-7.46051	800	-6	NA	NA	-0.733781	5.13e-11
1	490560	491060	AT1G02410	+	105	1	480486	480986	AT1G02410	+	1362	NA	Yes	10074	12	0.070444	1200	-21.4592	0.000187	4	0.070444	400	-3.99378	110	1231	-6.07905	800	8	0.481581	0.0234187	NA	NA
2	6801859	6802359	AT2G15590	+	867	2	6792514	6793014	AT2G15590	+	70	Yes	NA	9345	9	0.070444	900	-14.1244	0.198387	2	0.070444	200	-1.33092	864	66	-7.06721	700	-4	NA	NA	NA	NA
1	27996493	27996993	AT1G74490	+	844	1	27987936	27988436	AT1G74490	+	210	Yes	Yes	8557	6	0.070444	600	-7.47804	1	2	0.070444	200	-1.3309	807	165	-2.96515	400	2	-2.85737	2.41e-16	-5.09284	2.77e-44
2	10398458	10398958	AT2G24490	+	795	2	10396408	10396908	AT2G24490	+	956	Yes	Yes	2050	28	0.070444	2800	-69.3023	0	15	0.070444	1500	-28.9705	680	776	-5.81836	1300	26	-0.451562	0.0206252	NA	NA
1	23614978	23615478	AT1G63680	+	1100	1	23602029	23602529	AT1G63680	+	76	Yes	NA	12949	6	0.070444	600	-7.56865	1	1	0.070444	100	-0.452939	1188	51	-5.73888	500	2	2.1367	7.1e-43	-0.618867	0.0446677
1	3396148	3396648	AT1G10360	+	628	1	3388973	3389473	AT1G10360	+	85	Yes	NA	7175	6	0.070444	600	-7.55334	1	1	0.070444	100	-0.454441	525	69	-5.70427	500	2	4.96848	1.14e-78	NA	NA
1	10547468	10547968	AT1G30070	+	737	1	10538360	10538860	AT1G30070	+	375	Yes	Yes	9108	6	0.070444	600	-7.45602	1	1	0.070444	100	-0.457768	601	321	-5.63004	500	2	NA	NA	NA	NA
1	23390890	23391390	AT1G63090	+	456	1	23386998	23387498	AT1G63090	+	1342	NA	Yes	3892	10	0.070444	1000	-16.0904	0.029098	6	0.070444	600	-7.45759	355	1125	-1.8905	400	6	1.05067	0.000348372	NA	NA
1	26065056	26065556	AT1G69330	+	100	1	26057969	26058469	AT1G69330	+	1670	NA	Yes	7087	15	0.070444	1500	-29.8034	0	8	0.070444	800	-11.7526	84	1273	-3.60812	700	10	NA	NA	-0.467089	0.0405557
1	4174075	4174575	AT1G12270	+	66	1	4164494	4164994	AT1G12270	+	608	NA	Yes	9581	6	0.070444	600	-7.59074	1	5	0.070444	500	-5.71025	65	697	-0.568175	100	2	NA	NA	-1.26319	3.14e-09
1	19272523	19273023	AT1G51880	+	142	1	19256456	19256956	AT1G51880	+	1313	NA	Yes	16067	7	0.070444	700	-9.50401	1	3	0.070444	300	-2.52929	158	1297	-2.50127	400	2	-5.75359	8.01e-38	-2.49075	7.1e-09
1	22490548	22491048	AT1G61065	+	918	1	22489364	22489864	AT1G61065	+	637	Yes	Yes	1184	42	0.070444	4200	-120.067	0	30	0.070444	3000	-76.3846	966	546	-3.5582	1200	46	0.637284	0.0280062	NA	NA
1	12878998	12879498	AT1G35181	+	1151	1	12867376	12867876	AT1G35181	+	72	Yes	NA	11622	8	0.070444	800	-11.7987	1	2	0.070444	200	-1.33092	1122	65	-5.56852	600	4	NA	NA	-0.554151	0.000152345
2	12645902	12646402	AT2G29550	+	65	2	12628987	12629487	AT2G29550	+	1083	NA	Yes	16915	6	0.070444	600	-7.59334	1	0	0.070444	0	1.00777	65	1056	1.00777	600	2	NA	NA	NA	NA
1	22371011	22371511	AT1G60780	+	1717	1	22363519	22364019	AT1G60780	+	49	Yes	NA	7492	9	0.070444	900	-14.3218	0.166663	2	0.070444	200	-1.33093	1683	57	-7.10981	700	-4	NA	NA	-5.72993	1.59e-15
2	11726054	11726554	AT2G27420	+	117	2	11709532	11710032	AT2G27420	+	1320	Yes	Yes	16522	6	0.070444	600	-7.51841	1	1	0.070444	100	-0.45587	104	1203	-5.672	500	2	NA	NA	-4.99033	1.61e-21
1	18202419	18202919	AT1G49210	+	1082	1	18183085	18183585	AT1G49210	+	222	Yes	NA	19334	7	0.070444	700	-9.46377	1	1	0.070444	100	-0.456898	1101	164	-7.4922	600	-2	NA	NA	NA	NA
3	834115	834615	AT3G03500	+	51	3	826047	826547	AT3G03500	+	1201	NA	Yes	8068	6	0.070444	600	-7.64097	1	2	0.070444	200	-1.33097	40	1015	-3.03597	400	2	-5.74972	1.8e-35	1.56915	0.00412117
1	6240009	6240509	AT1G18140	+	281	1	6229628	6230128	AT1G18140	+	894	Yes	Yes	10381	14	0.070444	1400	-26.4069	2e-06	1	0.070444	100	-0.457125	188	601	-23.8411	1300	-10	-3.57713	1.8e-09	-5.33591	9.19e-35
2	7980579	7981079	AT2G18370	+	1936	2	7942504	7943004	AT2G18370	+	292	Yes	NA	38075	6	0.070444	600	-7.46396	1	2	0.070444	200	-1.33089	1677	237	-2.95866	400	2	-5.14697	5.81e-38	3.02405	1.67e-25
2	12706589	12707089	AT2G29740	+	1669	2	12705030	12705530	AT2G29740	+	538	Yes	Yes	1559	31	0.070444	3100	-79.8867	0	21	0.070444	2100	-46.6711	1486	572	-3.36298	1000	30	-2.33506	3.71e-06	-0.98104	3.17e-05
2	7969123	7969623	AT2G18340	+	1536	2	7966442	7966942	AT2G18340	+	105	Yes	NA	2681	19	0.070444	1900	-41.8544	0	9	0.070444	900	-14.0785	1298	78	-5.82476	1000	16	NA	NA	NA	NA
2	19493490	19493990	AT2G47500	+	29	2	19485642	19486142	AT2G47500	+	1145	NA	Yes	7848	8	0.070444	800	-12.3171	1	2	0.070444	200	-1.33104	29	941	-5.8114	600	4	NA	NA	-1.45561	2.62e-05
1	20080639	20081139	AT1G53790	+	1662	1	20074464	20074964	AT1G53790	+	68	Yes	NA	6175	14	0.070444	1400	-27.373	1e-06	4	0.070444	400	-4.02825	1570	52	-9.03246	1000	-10	-1.7157	1.37e-21	NA	NA
1	24778927	24779427	AT1G66430	+	683	1	24774549	24775049	AT1G66430	+	97	Yes	NA	4378	9	0.070444	900	-14.0011	0.217464	2	0.070444	200	-1.33092	628	69	-7.05563	700	-4	2.63307	3.58e-152	-0.991007	4.5e-27
1	25615362	25615862	AT1G68340	+	1255	1	25611975	25612475	AT1G68340	+	181	Yes	Yes	3387	21	0.070444	2100	-47.4321	0	10	0.070444	1000	-16.2108	1068	185	-5.95031	1100	18	-0.426438	0.0290676	NA	NA
1	20080621	20081121	AT1G53790	+	1662	1	20078563	20079063	AT1G53790	+	247	Yes	NA	2058	67	0.070444	6700	-228.341	0	44	0.070444	4400	-132.194	1570	169	-8.55553	2300	-88	-1.7157	1.37e-21	NA	NA
2	15124616	15125116	AT2G36020	+	1270	2	15112556	15113056	AT2G36020	+	219	Yes	NA	12060	6	0.070444	600	-7.47597	1	4	0.070444	400	-3.98023	1139	200	-0.991132	200	2	NA	NA	NA	NA
2	18970574	18971074	AT2G46180	+	110	2	18957480	18957980	AT2G46180	+	1116	NA	Yes	13094	8	0.070444	800	-11.6883	1	4	0.070444	400	-4.00687	77	958	-2.25315	400	4	NA	NA	NA	NA
1	3061022	3061522	AT1G09483	+	1714	1	3051467	3051967	AT1G09483	+	32	Yes	NA	9555	7	0.070444	700	-9.92017	1	1	0.070444	100	-0.445871	1637	23	-7.93186	600	-2	NA	NA	NA	NA
1	21951050	21951550	AT1G59725	+	1378	1	21933457	21933957	AT1G59725	+	1988	Yes	Yes	17593	7	0.141675	348.054	-9.40493	1	0	0	0	0	0	0	0	348.054	2	-4.30247	6.17e-12	NA	NA
1	19401963	19402463	AT1G52130	+	145	1	19388689	19389189	AT1G52130	+	695	NA	Yes	13274	8	0.070444	800	-11.6389	1	3	0.070444	300	-2.53197	116	644	-3.45639	500	4	NA	NA	-4.99308	5.83e-08
1	24398498	24398998	AT1G65620	+	1407	1	24383491	24383991	AT1G65620	+	126	Yes	NA	15007	6	0.070444	600	-7.51185	1	1	0.070444	100	-0.455432	1279	90	-5.68182	500	2	2.9509	3.06e-16	NA	NA
2	13932503	13933003	AT2G32840	+	159	2	13925928	13926428	AT2G32840	+	1557	NA	Yes	6575	12	0.070444	1200	-21.2663	0.00022	7	0.070444	700	-9.50401	142	1313	-2.37378	500	8	0.487423	0.00018351	NA	NA
1	22766547	22767047	AT1G61667	+	90	1	22748439	22748939	AT1G61667	+	1303	NA	Yes	18108	8	0.070444	800	-11.7343	1	3	0.070444	300	-2.53637	81	1177	-3.48385	500	4	-1.71099	0.0010368	-0.549478	0.00315875
1	120377	120877	AT1G01310	+	1102	1	118582	119082	AT1G01310	+	306	Yes	NA	1795	23	0.070444	2300	-53.3415	0	15	0.070444	1500	-29.1669	855	281	-3.03096	800	20	NA	NA	0.482334	0.00476759
1	8501983	8502483	AT1G24020	+	214	1	8480970	8481470	AT1G24020	+	1289	Yes	Yes	21013	6	0.070444	600	-7.4771	1	1	0.070444	100	-0.456898	164	1184	-5.64914	500	2	5.70857	3.36e-69	NA	NA
2	17154803	17155303	AT2G41150	+	1117	2	17143055	17143555	AT2G41150	+	175	Yes	NA	11748	8	0.070444	800	-11.6126	1	2	0.070444	200	-1.3309	1062	144	-5.47168	600	4	-1.71163	6.06e-07	-1.31334	4.52e-11
2	12931585	12932085	AT2G30340	+	757	2	12927010	12927510	AT2G30340	+	97	Yes	NA	4575	12	0.070444	1200	-21.507	0.000179	3	0.070444	300	-2.53945	696	67	-8.61019	900	-8	-5.10924	8.51e-23	1.53081	5.45e-10
1	1801443	1801943	AT1G05940	+	285	1	1790109	1790609	AT1G05940	+	1364	Yes	Yes	11334	9	0.070444	900	-13.7984	0.250759	4	0.070444	400	-3.97248	380	1044	-2.99194	500	4	NA	NA	NA	NA
2	9158531	9159031	AT2G21400	+	1311	2	9156543	9157043	AT2G21400	+	88	Yes	Yes	1988	27	0.070444	2700	-69.6923	0	16	0.070444	1600	-32.8512	1173	91	-5.02876	1100	26	-3.25923	1.74e-05	-0.441965	2.2e-05
1	4868934	4869434	AT1G14250	+	1186	1	4858926	4859426	AT1G14250	+	167	Yes	NA	10008	8	0.070444	800	-11.6187	1	3	0.070444	300	-2.53206	948	115	-3.45693	500	4	7.67331	7.83e-50	-4.94101	9.28e-16
1	26922474	26922974	AT1G71440	+	100	1	26919456	26919956	AT1G71440	+	1596	NA	Yes	3018	18	0.070444	1800	-38.8031	0	9	0.070444	900	-13.9886	101	1329	-4.84483	900	14	0.241508	0.0201471	0.698191	0.0184411
2	167880	168380	AT2G01360	+	1278	2	154607	155107	AT2G01360	+	55	Yes	NA	13273	7	0.070444	700	-9.68786	1	2	0.070444	200	-1.33093	1296	54	-4.22887	500	2	NA	NA	3.4675	5.08e-133
2	13958043	13958543	AT2G32905	+	103	2	13949989	13950489	AT2G32905	+	1037	NA	Yes	8054	7	0.070444	700	-9.54692	1	5	0.070444	500	-5.70155	71	1096	-0.957213	200	2	NA	NA	7.77776	1.7e-110
2	13916985	13917485	AT2G32800	+	1121	2	13910412	13910912	AT2G32800	+	1626	Yes	Yes	6573	35	0.094266	2615.51	-93.6144	0	16	0.072983	1544.32	-31.7185	991	1406	-4.96077	1071.19	36	1.71381	1.14e-12	2.7413	5.12e-18
3	221078	221578	AT3G01560	+	84	3	218401	218901	AT3G01560	+	1390	NA	Yes	2677	17	0.070444	1700	-35.9986	0	8	0.070444	800	-11.8033	71	899	-5.30425	900	14	NA	NA	7.01863	1.36e-53
1	4869029	4869529	AT1G14250	+	1186	1	4860526	4861026	AT1G14250	+	160	Yes	NA	8503	9	0.070444	900	-13.8789	0.236269	6	0.070444	600	-7.48247	948	193	-1.37114	300	4	7.67331	7.83e-50	NA	NA
1	18187039	18187539	AT1G49180	+	1556	1	18183111	18183611	AT1G49180	+	222	Yes	NA	3928	28	0.070444	2800	-70.5126	0	17	0.070444	1700	-35.2115	1324	164	-4.53882	1100	26	0.76339	1.7e-05	NA	NA
2	8021013	8021513	AT2G18490	+	425	2	8009547	8010047	AT2G18490	+	97	Yes	Yes	11466	7	0.070444	700	-9.55668	1	4	0.070444	400	-3.99492	428	106	-1.55204	300	2	NA	NA	NA	NA
2	18307489	18307989	AT2G44300	+	1839	2	18281987	18282487	AT2G44300	+	154	Yes	NA	25502	7	0.070444	700	-9.49526	1	3	0.070444	300	-2.53172	1345	119	-2.50916	400	2	-1.67675	9.05e-09	3.79421	1.02e-82
1	20091010	20091510	AT1G53820	+	1310	1	20078578	20079078	AT1G53820	+	247	Yes	NA	12432	12	0.070444	1200	-21.1362	0.000246	5	0.070444	500	-5.64798	1204	169	-4.39258	700	8	NA	NA	NA	NA
1	22119160	22119660	AT1G60040	+	395	1	22115997	22116497	AT1G60040	+	142	Yes	NA	3163	9	0.070444	900	-13.9024	0.232365	2	0.070444	200	-1.3309	366	116	-6.95503	700	-4	NA	NA	-0.850004	0.000470154
1	4052041	4052541	AT1G12000	+	129	1	4048463	4048963	AT1G12000	+	1420	NA	Yes	3578	24	0.070444	2400	-57.8513	0	10	0.070444	1000	-16.3661	106	1269	-9.01584	1400	-22	-1.03589	1.29e-07	NA	NA
1	9182410	9182910	AT1G26570	+	62	1	9179083	9179583	AT1G26570	+	285	NA	Yes	3327	7	0.070444	700	-9.65306	1	3	0.070444	300	-2.54829	45	195	-2.56507	400	2	2.64413	1.36e-38	3.70255	1.95e-26
1	7823958	7824458	AT1G22160	+	81	1	7814890	7815390	AT1G22160	+	1119	NA	Yes	9068	7	0.070444	700	-9.59003	1	3	0.070444	300	-2.54059	63	1106	-2.53864	400	2	NA	NA	0.620741	0.0169944
1	21363918	21364418	AT1G57680	+	79	1	21359400	21359900	AT1G57680	+	778	NA	Yes	4518	10	0.070444	1000	-16.4942	0.021174	4	0.070444	400	-4.01345	67	622	-4.02666	600	6	NA	NA	NA	NA
1	1168047	1168547	AT1G04360	+	1140	1	1165960	1166460	AT1G04360	+	85	Yes	NA	2087	24	0.070444	2400	-59.0733	0	8	0.070444	800	-11.9446	814	50	-14.1119	1600	-22	-1.35568	9.97e-05	3.73658	4.28e-70
2	15597992	15598492	AT2G37130	+	171	2	15591526	15592026	AT2G37130	+	1576	Yes	Yes	6466	21	0.070444	2100	-47.4994	0	13	0.070444	1300	-23.8958	164	1140	-3.32009	800	18	-2.55278	1.31e-12	NA	NA
2	19693899	19694399	AT2G48160	+	97	2	19670395	19670895	AT2G48160	+	1048	Yes	NA	23504	6	0.070444	600	-7.53747	1	1	0.070444	100	-0.455158	83	781	-5.68801	500	2	0.411714	0.0142708	NA	NA
1	28705903	28706403	AT1G76500	+	67	1	28681464	28681964	AT1G76500	+	2009	NA	Yes	24439	6	0.070444	600	-7.58823	1	0	0	0	0	0	0	0	600	2	-3.67119	6.67e-35	-5.09158	2.03e-24
1	6984514	6985014	AT1G20135	+	536	1	6977881	6978381	AT1G20135	+	493	Yes	Yes	6633	12	0.070444	1200	-21.0211	0.000273	5	0.070444	500	-5.62548	484	417	-4.33103	700	8	NA	NA	NA	NA
1	27994416	27994916	AT1G74490	+	233	1	27991880	27992380	AT1G74490	+	952	Yes	Yes	2536	23	0.070444	2300	-53.5941	0	7	0.070444	700	-9.47042	203	728	-12.8697	1600	-20	-2.85737	2.41e-16	5.26401	1.15e-252
1	23614572	23615072	AT1G63680	+	1614	1	23606029	23606529	AT1G63680	+	53	Yes	NA	8543	7	0.070444	700	-9.69959	1	3	0.070444	300	-2.5451	1523	51	-2.55402	400	2	2.1367	7.1e-43	-0.397091	0.0469275
2	17479013	17479513	AT2G41890	+	116	2	17469063	17469563	AT2G41890	+	1875	NA	Yes	9950	6	0.070444	600	-7.5192	1	2	0.070444	200	-1.33091	99	1733	-2.97963	400	2	NA	NA	NA	NA
1	3396146	3396646	AT1G10360	+	628	1	3391502	3392002	AT1G10360	+	108	Yes	NA	4644	6	0.070444	600	-7.52609	1	2	0.070444	200	-1.3309	525	108	-2.97658	400	2	4.96848	1.14e-78	-1.8353	0.000154611
1	248021	248521	AT1G01680	+	1178	1	228978	229478	AT1G01680	+	169	Yes	NA	19043	8	0.070444	800	-11.6171	1	4	0.070444	400	-3.98544	992	152	-2.22671	400	4	NA	NA	0.651207	3.47e-05
1	10546523	10547023	AT1G30070	+	136	1	10543869	10544369	AT1G30070	+	670	Yes	Yes	2654	20	0.070444	2000	-44.6191	0	8	0.070444	800	-11.6743	118	675	-7.88172	1200	-16	NA	NA	NA	NA
1	17284462	17284962	AT1G47128	+	72	1	17276996	17277496	AT1G47128	+	1407	NA	Yes	7466	10	0.070444	1000	-16.544	0.020295	4	0.070444	400	-4.02138	58	1229	-4.0575	600	6	NA	NA	NA	NA
1	23392409	23392909	AT1G63090	+	164	1	23390476	23390976	AT1G63090	+	1639	NA	Yes	1933	32	0.070444	3200	-85.5796	0	17	0.070444	1700	-35.4059	132	1354	-7.41557	1500	-32	1.05067	0.000348372	1.0909	3.19e-05
2	16234545	16235045	AT2G38860	+	1836	2	16220558	16221058	AT2G38860	+	74	Yes	NA	13987	6	0.070444	600	-7.57257	1	2	0.070444	200	-1.33092	1528	65	-2.99906	400	2	-2.15809	6.36e-11	NA	NA
1	12879458	12879958	AT1G35181	+	246	1	12871958	12872458	AT1G35181	+	495	Yes	Yes	7500	9	0.070444	900	-13.8146	0.247578	1	0.070444	100	-0.457616	275	586	-11.5669	800	-4	NA	NA	NA	NA
1	22371896	22372396	AT1G60780	+	803	1	22365545	22366045	AT1G60780	+	131	Yes	NA	6351	9	0.070444	900	-13.9201	0.229613	2	0.070444	200	-1.33091	654	82	-7.01571	700	-4	NA	NA	NA	NA
3	8977	9477	AT3G01040	+	1481	3	4451	4951	AT3G01040	+	41	Yes	NA	4526	8	0.070444	800	-12.0534	1	4	0.070444	400	-4.09204	1254	27	-2.36906	400	4	-0.261297	0.00629806	NA	NA
1	18202181	18202681	AT1G49210	+	1469	1	18185056	18185556	AT1G49210	+	134	Yes	Yes	17125	6	0.070444	600	-7.50677	1	1	0.070444	100	-0.456161	1404	116	-5.6655	500	2	NA	NA	0.76339	1.7e-05
1	7216031	7216531	AT1G20770	+	74	1	7209547	7210047	AT1G20770	+	1193	NA	Yes	6484	21	0.070444	2100	-49.2113	0	17	0.070444	1700	-36.6141	62	1194	-1.4476	400	18	-0.403869	1.52e-05	NA	NA
1	21385108	21385608	AT1G57750	+	1167	1	21373540	21374040	AT1G57750	+	57	Yes	NA	11568	6	0.070444	600	-7.61756	1	2	0.070444	200	-1.33093	1294	59	-3.00493	400	2	NA	NA	-0.444505	0.0235058
2	11726989	11727489	AT2G27420	+	519	2	11716585	11717085	AT2G27420	+	1330	Yes	Yes	10404	7	0.070444	700	-9.4235	1	6	0.070444	600	-7.45143	449	1212	-0.588064	100	2	NA	NA	7.89779	1.39e-115
3	8999	9499	AT3G01040	+	1481	3	3018	3518	AT3G01040	+	52	Yes	NA	5981	11	0.070444	1100	-19.3667	0.001399	5	0.070444	500	-5.79584	1254	36	-3.82999	600	6	-0.261297	0.00629806	NA	NA
1	5379035	5379535	AT1G15640	+	1060	1	5340923	5341423	AT1G15640	+	125	Yes	NA	38112	6	0.070444	600	-7.51253	1	0	0.070444	0	1.00441	1019	114	1.00441	600	2	-5.39105	1.64e-24	0.648643	0.0211162
1	25735063	25735563	AT1G68560	+	104	1	25710442	25710942	AT1G68560	+	2011	NA	Yes	24621	7	0.070444	700	-9.54541	1	1	0.070444	100	-0.454248	66	1500	-7.59074	600	-2	1.62811	1.08e-21	5.94517	1.77e-46
1	12960571	12961071	AT1G35320	+	124	1	12956944	12957444	AT1G35320	+	838	NA	Yes	3627	19	0.070444	1900	-41.5998	0	7	0.070444	700	-9.57604	87	796	-8.67685	1200	-16	-2.63216	4.18e-30	NA	NA
1	21902415	21902915	AT1G59620	+	1217	1	21888125	21888625	AT1G59620	+	126	Yes	NA	14290	6	0.070444	600	-7.51185	1	2	0.070444	200	-1.3309	1137	103	-2.97821	400	2	3.17175	1.47e-30	-1.21717	0.00752113
1	19242102	19242602	AT1G51823	+	639	1	19237572	19238072	AT1G51823	+	183	Yes	NA	4530	9	0.070444	900	-13.8556	0.240158	2	0.070444	200	-1.3309	654	135	-6.93482	700	-4	NA	NA	1.48462	3.5e-07
1	24594845	24595345	AT1G66060	+	513	1	24577362	24577862	AT1G66060	+	1049	NA	Yes	17483	8	0.070444	800	-11.5302	1	1	0.070444	100	-0.458076	486	948	-9.42553	700	-4	2.21411	0.00120448	-4.28271	6.31e-15
2	14070043	14070543	AT2G33200	+	86	2	14068911	14069411	AT2G33200	+	483	NA	Yes	1132	9	0.070444	900	-14.0416	0.211312	5	0.070444	500	-5.68614	85	441	-2.06385	400	4	NA	NA	NA	NA
2	10356010	10356510	AT2G24340	+	34	2	10349304	10349804	AT2G24340	+	736	NA	Yes	6706	6	0.070444	600	-7.75577	1	2	0.070444	200	-1.33099	35	610	-3.05021	400	2	NA	NA	0.499146	5.33e-06
2	18970039	18970539	AT2G46180	+	58	2	18958999	18959499	AT2G46180	+	1305	NA	Yes	11040	6	0.070444	600	-7.61415	1	1	0.070444	100	-0.45305	52	1456	-5.7363	500	2	NA	NA	-3.67556	7.51e-22
1	7260984	7261484	AT1G20875	+	648	1	7258493	7258993	AT1G20875	+	1082	NA	Yes	2491	36	0.070444	3600	-97.6295	0	25	0.070444	2500	-59.3903	658	995	-3.46993	1100	38	NA	NA	NA	NA
2	12444420	12444920	AT2G28970	+	734	2	12426931	12427431	AT2G28970	+	91	Yes	NA	17489	7	0.070444	700	-9.56777	1	2	0.070444	200	-1.33091	896	88	-4.1775	500	2	-5.31659	4.19e-130	-0.540292	0.000754902
1	28690985	28691485	AT1G76470	+	74	1	28681419	28681919	AT1G76470	+	2009	NA	Yes	9566	8	0.070444	800	-11.7899	1	0	0	0	0	0	0	0	800	4	-4.10994	3.55e-07	-5.09158	2.03e-24
2	8303972	8304472	AT2G19146	+	803	2	8294034	8294534	AT2G19146	+	477	Yes	Yes	9938	10	0.070444	1000	-16.0868	0.029182	6	0.070444	600	-7.44944	844	491	-1.88724	400	6	NA	NA	-1.80103	1.26e-07
1	23409515	23410015	AT1G63120	+	57	1	23390447	23390947	AT1G63120	+	1639	NA	Yes	19068	6	0.070444	600	-7.61756	1	5	0.070444	500	-5.79584	36	1354	-0.557339	100	2	NA	NA	1.0909	3.19e-05
1	21951445	21951945	AT1G59725	+	670	1	21935490	21935990	AT1G59725	+	1764	Yes	Yes	15955	7	0.070444	700	-9.41677	1	5	0.070444	500	-5.61967	675	1668	-0.957012	200	2	-4.30247	6.17e-12	NA	NA
1	11702009	11702509	AT1G32420	+	715	1	11694486	11694986	AT1G32420	+	54	Yes	NA	7523	9	0.070444	900	-14.2598	0.176492	4	0.070444	400	-4.01271	816	68	-3.08403	500	4	NA	NA	NA	NA
1	5243976	5244476	AT1G15240	+	77	1	5238427	5238927	AT1G15240	+	793	NA	Yes	5549	13	0.070444	1300	-24.3998	1.1e-05	2	0.070444	200	-1.33093	53	780	-14.4629	1100	-8	0.392317	0.0165112	0.850384	0.00035097
1	8501984	8502484	AT1G24020	+	214	1	8483522	8484022	AT1G24020	+	890	Yes	Yes	18462	6	0.070444	600	-7.4771	1	1	0.070444	100	-0.456898	164	816	-5.64914	500	2	5.70857	3.36e-69	NA	NA
2	17412962	17413462	AT2G41740	+	63	2	17406510	17407010	AT2G41740	+	1564	NA	Yes	6452	16	0.070444	1600	-33.462	0	4	0.070444	400	-4.03536	47	1489	-12.2571	1200	-12	NA	NA	2.32813	3.86e-78
1	7574334	7574834	AT1G21610	+	442	1	7572046	7572546	AT1G21610	+	168	Yes	NA	2288	8	0.070444	800	-11.6179	1	2	0.070444	200	-1.3309	464	115	-5.4913	600	4	0.438538	0.0139386	2.27712	1.51e-57
1	27265470	27265970	AT1G72430	+	1096	1	27258938	27259438	AT1G72430	+	38	Yes	NA	6532	8	0.070444	800	-12.1022	1	4	0.070444	400	-4.03697	1231	46	-2.29204	400	4	0.792465	0.0441792	NA	NA
1	7434479	7434979	AT1G21240	+	529	1	7422482	7422982	AT1G21240	+	77	Yes	NA	11997	6	0.070444	600	-7.56677	1	3	0.070444	300	-2.53714	493	77	-1.70737	300	2	NA	NA	-0.921962	7.75e-09
1	24398425	24398925	AT1G65620	+	1407	1	24390064	24390564	AT1G65620	+	60	Yes	NA	8361	7	0.070444	700	-9.66213	1	2	0.070444	200	-1.33096	1279	42	-4.26843	500	2	2.9509	3.06e-16	0.489839	0.0202416
1	853007	853507	AT1G03440	+	114	1	846499	846999	AT1G03440	+	1023	NA	Yes	6508	10	0.070444	1000	-16.3403	0.023887	6	0.070444	600	-7.51611	120	874	-1.91456	400	6	1.93441	3.14e-27	NA	NA
1	11702878	11703378	AT1G32420	+	528	1	11696488	11696988	AT1G32420	+	97	Yes	NA	6390	8	0.070444	800	-11.716	1	3	0.070444	300	-2.53844	520	71	-3.49697	500	4	NA	NA	NA	NA
2	17395512	17396012	AT2G41700	+	904	2	17381509	17382009	AT2G41700	+	1334	Yes	Yes	14003	25	0.070444	2500	-59.2733	0	9	0.070444	900	-13.7311	850	1107	-10.746	1600	-22	-0.20774	0.00727362	-3.25349	9.78e-10
2	13934125	13934625	AT2G32840	+	200	2	13928538	13929038	AT2G32840	+	1721	NA	Yes	5587	22	0.070444	2200	-50.5226	0	7	0.070444	700	-9.48896	164	1623	-11.7567	1500	-18	0.487423	0.00018351	NA	NA
2	17154075	17154575	AT2G41150	+	1286	2	17152993	17153493	AT2G41150	+	328	Yes	Yes	1082	41	0.070444	4100	-117.499	0	22	0.070444	2200	-50.0643	1262	338	-8.45803	1900	-46	-1.71163	6.06e-07	0.677938	9.27e-06
1	29487100	29487600	AT1G78380	+	1239	1	29482014	29482514	AT1G78380	+	137	Yes	NA	5086	16	0.070444	1600	-32.4157	0	2	0.070444	200	-1.3309	1056	117	-20.0812	1400	-12	-0.608156	0.00376162	-3.90843	1.02e-13
1	19670532	19671032	AT1G52825	+	81	1	19663929	19664429	AT1G52825	+	1165	NA	Yes	6603	12	0.070444	1200	-21.6325	0.000161	5	0.070444	500	-5.70427	69	994	-4.55578	700	8	NA	NA	NA	NA
2	12931965	12932465	AT2G30340	+	1192	2	12929411	12929911	AT2G30340	+	105	Yes	NA	2554	24	0.070444	2400	-58.3783	0	14	0.070444	1400	-27.0371	1245	91	-4.63427	1000	22	-5.10924	8.51e-23	NA	NA
1	843391	843891	AT1G03400	+	448	1	839516	840016	AT1G03400	+	98	Yes	NA	3875	9	0.070444	900	-13.9979	0.217969	4	0.070444	400	-4.00687	392	77	-3.07021	500	4	2.79775	1.1e-12	-0.349712	0.000653679
1	1802685	1803185	AT1G05940	+	397	1	1798003	1798503	AT1G05940	+	112	Yes	NA	4682	8	0.070444	800	-11.6846	1	1	0.070444	100	-0.456071	305	112	-9.5343	700	-4	NA	NA	NA	NA
2	16649917	16650417	AT2G39885	+	87	2	16637822	16638322	AT2G39885	+	448	NA	Yes	12095	9	0.070444	900	-14.0374	0.211969	3	0.070444	300	-2.54607	49	458	-4.67471	600	4	NA	NA	6.30833	6.91e-10
1	4868951	4869451	AT1G14250	+	1186	1	4861036	4861536	AT1G14250	+	521	Yes	Yes	7915	19	0.070444	1900	-40.5872	0	3	0.070444	300	-2.52428	948	497	-19.6675	1600	-14	7.67331	7.83e-50	-0.814159	5.43e-10
1	27651863	27652363	AT1G73570	+	1678	1	27644424	27644924	AT1G73570	+	28	Yes	NA	7439	6	0.070444	600	-7.83292	1	1	0.070444	100	-0.450531	1433	36	-5.79584	500	2	1.46631	4.72e-09	3.70203	2.09e-49
1	19288023	19288523	AT1G51910	+	763	1	19263865	19264365	AT1G51910	+	110	Yes	NA	24158	6	0.070444	600	-7.52428	1	1	0.070444	100	-0.45587	814	104	-5.672	500	2	NA	NA	-4.99841	6.17e-13
2	167899	168399	AT2G01360	+	1278	2	160416	160916	AT2G01360	+	78	Yes	NA	7483	10	0.070444	1000	-16.5008	0.021058	2	0.070444	200	-1.33092	1296	65	-8.70221	800	-6	NA	NA	NA	NA
1	1803471	1803971	AT1G05940	+	2010	1	1798507	1799007	AT1G05940	+	127	Yes	NA	4964	24	0.070444	2400	-57.887	0	12	0.070444	1200	-21.5561	1763	90	-6.58619	1200	22	NA	NA	NA	NA
2	993068	993568	AT2G03270	+	54	2	986137	986637	AT2G03270	+	409	NA	Yes	6931	6	0.070444	600	-7.62858	1	1	0.070444	100	-0.449205	31	394	-5.82799	500	2	0.685269	2.41e-07	NA	NA
3	359459	359959	AT3G02065	+	96	3	355367	355867	AT3G02065	+	845	NA	Yes	4092	6	0.070444	600	-7.53864	1	2	0.070444	200	-1.33091	85	1014	-2.98568	400	2	0.331358	0.00105181	1.65849	1.86e-62
1	19026385	19026885	AT1G51320	+	1240	1	19012499	19012999	AT1G51320	+	1701	Yes	Yes	13886	11	0.109082	710.365	-18.4527	0.003103	4	0.116645	241.565	-3.96662	1207	1845	-5.88265	468.8	6	NA	NA	NA	NA
2	7186469	7186969	AT2G16580	+	105	2	7181535	7182035	AT2G16580	+	1942	NA	Yes	4934	22	0.070444	2200	-51.5979	0	11	0.070444	1100	-19.1061	70	1817	-6.23634	1100	20	-1.69393	1.34e-09	-3.88879	1.53e-39
1	7901883	7902383	AT1G22380	+	1977	1	7884061	7884561	AT1G22380	+	161	Yes	NA	17822	8	0.070444	800	-11.6237	1	3	0.070444	300	-2.53048	1742	136	-3.44723	500	4	NA	NA	NA	NA
1	562363	562863	AT1G02630	+	968	1	547543	548043	AT1G02630	+	143	Yes	Yes	14820	6	0.070444	600	-7.50174	1	1	0.070444	100	-0.455843	807	103	-5.67261	500	2	2.79735	2.72e-05	-3.04612	8.39e-09
1	26725583	26726083	AT1G70890	+	1780	1	26704013	26704513	AT1G70890	+	229	Yes	NA	21570	9	0.070444	900	-13.8234	0.245873	1	0.070444	100	-0.457196	1646	197	-11.5985	800	-4	NA	NA	NA	NA
2	13410465	13410965	AT2G31480	+	1391	2	13401351	13401851	AT2G31480	+	48	Yes	NA	9114	6	0.070444	600	-7.65499	1	2	0.070444	200	-1.33092	1490	68	-2.99653	400	2	NA	NA	0.903861	7.71e-07
2	17840453	17840953	AT2G42880	+	89	2	17831457	17831957	AT2G42880	+	1080	NA	Yes	8996	11	0.070444	1100	-18.9513	0.002051	2	0.070444	200	-1.33094	51	1076	-10.5942	900	-6	NA	NA	-4.77827	9.88e-20
1	9274911	9275411	AT1G26790	+	983	1	9246842	9247342	AT1G26790	+	77	Yes	NA	28069	6	0.070444	600	-7.56677	1	0	0.070444	0	1.00721	777	70	1.00721	600	2	NA	NA	NA	NA
1	7823409	7823909	AT1G22160	+	77	1	7818011	7818511	AT1G22160	+	590	NA	Yes	5398	6	0.070444	600	-7.56677	1	3	0.070444	300	-2.54154	60	580	-1.71294	300	2	NA	NA	NA	NA
2	15068943	15069443	AT2G35890	+	1430	2	15062488	15062988	AT2G35890	+	132	Yes	NA	6455	16	0.070444	1600	-32.4476	0	6	0.070444	600	-7.53521	1571	99	-6.99349	1000	-12	-5.44029	7.67e-17	0.707082	0.00274217
1	12400706	12401206	AT1G34065	+	77	1	12389325	12389825	AT1G34065	+	548	NA	Yes	11381	6	0.070444	600	-7.56677	1	2	0.070444	200	-1.33093	55	643	-3.00958	400	2	NA	NA	NA	NA
1	5294969	5295469	AT1G15390	+	95	1	5283417	5283917	AT1G15390	+	1158	NA	Yes	11552	7	0.070444	700	-9.56022	1	4	0.070444	400	-4.01345	67	1042	-1.56096	300	2	1.00744	7.07e-16	NA	NA
2	14150955	14151455	AT2G33390	+	255	2	14146206	14146706	AT2G33390	+	699	NA	Yes	4749	22	0.070444	2200	-50.2786	0	7	0.070444	700	-9.47361	195	680	-11.6528	1500	-18	NA	NA	3.43544	1.69e-06
1	26751990	26752490	AT1G70949	+	791	1	26743049	26743549	AT1G70949	+	159	Yes	NA	8941	10	0.070444	1000	-16.2444	0.025698	4	0.070444	400	-3.99036	793	124	-3.93996	600	6	NA	NA	1.6322	1.08e-16
1	10876490	10876990	AT1G30660	+	482	1	10864174	10864674	AT1G30660	+	59	Yes	Yes	12316	6	0.070444	600	-7.61086	1	3	0.070444	300	-2.54059	495	63	-1.71172	300	2	NA	NA	-1.38342	5.2e-17
2	8603528	8604028	AT2G19920	+	84	2	8600566	8601066	AT2G19920	+	905	NA	Yes	2962	12	0.070444	1200	-21.6051	0.000165	5	0.070444	500	-5.70427	69	961	-4.55578	700	8	4.37394	9.6e-31	5.88607	1.95e-40
1	20439383	20439883	AT1G54780	+	693	1	20435917	20436417	AT1G54780	+	77	Yes	NA	3466	8	0.070444	800	-11.7777	1	2	0.070444	200	-1.33091	527	86	-5.52469	600	4	6.35194	0	NA	NA
1	26335451	26335951	AT1G69920	+	473	1	26327345	26327845	AT1G69920	+	654	Yes	Yes	8106	7	0.070444	700	-9.4264	1	1	0.070444	100	-0.457968	412	468	-7.45352	600	-2	-3.59504	7.07e-08	0.809515	0.0394661
1	27996528	27997028	AT1G74490	+	844	1	27993938	27994438	AT1G74490	+	204	Yes	NA	2590	25	0.070444	2500	-60.382	0	14	0.070444	1400	-26.5515	807	188	-4.96549	1100	22	-2.85737	2.41e-16	NA	NA
1	26752066	26752566	AT1G70949	+	791	1	26749070	26749570	AT1G70949	+	1776	Yes	Yes	2996	45	0.072652	4363.23	-131.323	0	27	0.070444	2700	-65.9366	793	1618	-6.07751	1663.23	50	NA	NA	NA	NA
2	14151469	14151969	AT2G33390	+	160	2	14148932	14149432	AT2G33390	+	1189	NA	Yes	2537	19	0.070444	1900	-41.2912	0	6	0.070444	600	-7.53096	103	1167	-10.507	1300	-16	NA	NA	-1.70503	3.26e-05
2	17478501	17479001	AT2G41890	+	61	2	17472510	17473010	AT2G41890	+	1160	NA	Yes	5991	6	0.070444	600	-7.60462	1	5	0.070444	500	-5.70427	69	1030	-0.568928	100	2	NA	NA	1.60788	2.17e-15
1	23614205	23614705	AT1G63680	+	619	1	23610521	23611021	AT1G63680	+	71	Yes	NA	3684	7	0.070444	700	-9.61882	1	1	0.070444	100	-0.45372	555	59	-7.61086	600	-2	2.1367	7.1e-43	0.557861	0.00208393
1	25255115	25255615	AT1G67420	+	1446	1	25248480	25248980	AT1G67420	+	110	Yes	Yes	6635	6	0.070444	600	-7.52428	1	1	0.070444	100	-0.455815	1135	102	-5.67323	500	2	-1.00395	1.7e-15	2.80221	7e-27
1	29635415	29635915	AT1G78820	+	1684	1	29627515	29628015	AT1G78820	+	130	Yes	NA	7900	13	0.070444	1300	-24.0092	1.6e-05	3	0.070444	300	-2.53521	1469	88	-9.99907	1000	-8	7.243	6.03e-262	NA	NA
1	3898420	3898920	AT1G11593	+	67	1	3889047	3889547	AT1G11593	+	1643	NA	Yes	9373	7	0.070444	700	-9.63285	1	1	0.070444	100	-0.454833	76	1785	-7.56865	600	-2	NA	NA	-3.75507	2.6e-34
1	3396426	3396926	AT1G10360	+	1524	1	3395051	3395551	AT1G10360	+	179	Yes	NA	1375	43	0.070444	4300	-127.777	0	20	0.070444	2000	-45.1376	1501	100	-13.7981	2300	-50	4.96848	1.14e-78	NA	NA
1	20439350	20439850	AT1G54780	+	693	1	20437398	20437898	AT1G54780	+	86	Yes	NA	1952	6	0.070444	600	-7.55185	1	3	0.070444	300	-2.53422	527	95	-1.70372	300	2	6.35194	0	NA	NA
1	247461	247961	AT1G01680	+	1047	1	232018	232518	AT1G01680	+	154	Yes	NA	15443	8	0.070444	800	-11.6299	1	4	0.070444	400	-3.99406	986	109	-2.23722	400	4	NA	NA	-4.12081	1.23e-25
1	10547441	10547941	AT1G30070	+	737	1	10544952	10545452	AT1G30070	+	226	Yes	NA	2489	20	0.070444	2000	-44.0707	0	13	0.070444	1300	-23.8806	601	170	-2.77994	700	16	NA	NA	NA	NA
2	10042881	10043381	AT2G23600	+	141	2	10025045	10025545	AT2G23600	+	1844	NA	Yes	17836	6	0.070444	600	-7.5028	1	4	0.070444	400	-3.98747	139	1644	-0.991151	200	2	1.66039	3.59e-21	-5.39476	2.48e-36
2	15405034	15405534	AT2G36730	+	95	2	15391039	15391539	AT2G36730	+	777	NA	Yes	13995	7	0.070444	700	-9.56022	1	4	0.070444	400	-3.99492	106	1143	-1.55204	300	2	NA	NA	-2.35252	1.9e-05
1	895467	895967	AT1G03590	+	95	1	891139	891639	AT1G03590	+	587	Yes	Yes	4328	10	0.070444	1000	-16.4092	0.02266	4	0.070444	400	-4.00274	85	413	-3.98588	600	6	0.91821	1.04e-05	0.419062	0.039403
2	18729489	18729989	AT2G45434	+	177	2	18718489	18718989	AT2G45434	+	1702	Yes	Yes	11000	11	0.070444	1100	-18.6786	0.002562	10	0.070444	1000	-16.2153	181	1474	-0.605797	100	6	NA	NA	-2.78096	7.21e-08
2	14455504	14456004	AT2G34230	+	88	2	14446024	14446524	AT2G34230	+	1057	NA	Yes	9480	8	0.070444	800	-11.7401	1	3	0.070444	300	-2.53637	81	938	-3.48385	500	4	NA	NA	NA	NA
1	4260541	4261041	AT1G12490	+	1119	1	4250488	4250988	AT1G12490	+	79	Yes	NA	10053	8	0.070444	800	-11.77	1	3	0.070444	300	-2.54029	966	64	-3.50875	500	4	NA	NA	1.75552	4.35e-35
2	6501129	6501629	AT2G15025	+	1312	2	6480540	6481040	AT2G15025	+	50	Yes	NA	20589	8	0.070444	800	-11.9446	1	2	0.070444	200	-1.33101	1370	32	-5.76773	600	4	NA	NA	NA	NA
2	16234518	16235018	AT2G38860	+	1836	2	16221493	16221993	AT2G38860	+	121	Yes	NA	13025	6	0.070444	600	-7.51537	1	1	0.070444	100	-0.456161	1528	116	-5.6655	500	2	-2.15809	6.36e-11	1.34138	4.43e-13
1	12879460	12879960	AT1G35181	+	246	1	12877943	12878443	AT1G35181	+	137	Yes	NA	1517	6	0.070444	600	-7.50502	1	2	0.070444	200	-1.3309	275	155	-2.96654	400	2	NA	NA	3.86701	4.06e-36
1	28505612	28506112	AT1G75920	+	77	1	28499082	28499582	AT1G75920	+	806	NA	Yes	6530	6	0.070444	600	-7.56677	1	3	0.070444	300	-2.53359	100	834	-1.70295	300	2	NA	NA	3.62152	8.72e-18
1	2984841	2985341	AT1G09240	+	810	1	2978509	2979009	AT1G09240	+	78	Yes	NA	6332	9	0.070444	900	-14.0785	0.205695	4	0.070444	400	-4.02578	738	54	-3.11561	500	4	6.94794	8.81e-24	NA	NA
2	7196448	7196948	AT2G16592	+	66	2	7181548	7182048	AT2G16592	+	1942	NA	Yes	14900	13	0.070444	1300	-24.566	1e-05	7	0.070444	700	-9.62918	68	1817	-3.12849	600	8	NA	NA	-3.88879	1.53e-39
1	22371582	22372082	AT1G60780	+	1946	1	22367106	22367606	AT1G60780	+	54	Yes	NA	4476	10	0.070444	1000	-16.7361	0.017047	4	0.070444	400	-4.05833	1691	36	-4.20911	600	6	NA	NA	-0.558475	0.000254559
2	16234464	16234964	AT2G38860	+	1836	2	16223880	16224380	AT2G38860	+	104	Yes	NA	10584	10	0.070444	1000	-16.3733	0.023292	3	0.070444	300	-2.53336	1528	102	-5.73616	700	6	-2.15809	6.36e-11	NA	NA
2	937510	938010	AT2G03120	+	1703	2	935504	936004	AT2G03120	+	88	Yes	NA	2006	27	0.070444	2700	-69.6923	0	15	0.070444	1500	-29.9723	1499	86	-5.97211	1200	26	-0.741235	7.01e-16	NA	NA
1	6228939	6229439	AT1G18100	+	316	1	6222470	6222970	AT1G18100	+	172	Yes	NA	6469	8	0.070444	800	-11.6148	1	1	0.070444	100	-0.456636	402	143	-9.50322	700	-4	-5.33591	9.19e-35	NA	NA
3	8997	9497	AT3G01040	+	1481	3	6012	6512	AT3G01040	+	134	Yes	NA	2985	33	0.070444	3300	-90.0927	0	15	0.070444	1500	-30.0642	1254	80	-11.4732	1800	-34	-0.261297	0.00629806	NA	NA
1	3297531	3298031	AT1G10095	+	47	1	3278936	3279436	AT1G10095	+	1278	NA	Yes	18595	6	0.070444	600	-7.66008	1	2	0.070444	200	-1.33099	35	1094	-3.05021	400	2	NA	NA	-1.71792	6.28e-31
1	22920447	22920947	AT1G62020	+	613	1	22914451	22914951	AT1G62020	+	65	Yes	NA	5996	6	0.070444	600	-7.59334	1	4	0.070444	400	-4.02138	719	58	-0.991338	200	2	-0.518815	1.26e-10	NA	NA
1	3824486	3824986	AT1G11362	+	1506	1	3811480	3811980	AT1G11362	+	72	Yes	NA	13006	6	0.070444	600	-7.57672	1	2	0.070444	200	-1.33093	1382	56	-3.00835	400	2	NA	NA	0.48077	0.0230995
2	17790875	17791375	AT2G42730	+	1297	2	17784600	17785100	AT2G42730	+	95	Yes	NA	6275	9	0.070444	900	-14.0077	0.216433	5	0.070444	500	-5.69774	1297	74	-2.07175	400	4	NA	NA	NA	NA
3	74976	75476	AT3G01220	+	152	3	59634	60134	AT3G01220	+	1815	Yes	Yes	15342	7	0.070444	700	-9.49662	1	2	0.070444	200	-1.3309	136	1303	-4.14971	500	2	-3.46012	3.02e-49	-5.33745	4.09e-43
2	17110581	17111081	AT2G41997	+	635	2	17103014	17103514	AT2G41997	+	105	Yes	NA	7567	7	0.070444	700	-9.54393	1	2	0.070444	200	-1.33091	585	89	-4.1766	500	2	NA	NA	NA	NA
2	15449970	15450470	AT2G36835	+	99	2	15440879	15441379	AT2G36835	+	631	NA	Yes	9091	11	0.070444	1100	-18.8948	0.00215	5	0.070444	500	-5.69654	75	606	-3.61298	600	6	0.83973	0.00591354	NA	NA
2	13420946	13421446	AT2G31510	+	157	2	13405459	13405959	AT2G31510	+	2000	NA	Yes	15487	14	0.070444	1400	-26.6392	1e-06	6	0.070444	600	-7.52252	112	1887	-4.95043	800	10	0.256547	0.00992799	NA	NA
1	26964359	26964859	AT1G71695	+	1044	1	26944525	26945025	AT1G71695	+	370	Yes	Yes	19834	6	0.070444	600	-7.45639	1	3	0.070444	300	-2.52466	860	427	-1.69204	300	2	3.41473	8.33e-60	NA	NA
2	14161468	14161968	AT2G33420	+	83	2	14146325	14146825	AT2G33420	+	1299	NA	Yes	15143	6	0.070444	600	-7.55645	1	2	0.070444	200	-1.33093	57	1222	-3.00717	400	2	NA	NA	3.43544	1.69e-06
2	17824077	17824577	AT2G42835	+	129	2	17809020	17809520	AT2G42835	+	1404	NA	Yes	15057	6	0.070444	600	-7.50987	1	4	0.070444	400	-3.99221	116	1309	-0.991168	200	2	NA	NA	5.2475	2e-45
2	1689035	1689535	AT2G04810	+	1041	2	1677506	1678006	AT2G04810	+	55	Yes	NA	11529	11	0.070444	1100	-19.3104	0.001477	3	0.070444	300	-2.54558	1183	50	-7.30097	800	-6	NA	NA	-1.22536	3.56e-39
2	10416512	10417012	AT2G24520	+	646	2	10400100	10400600	AT2G24520	+	1512	Yes	Yes	16412	6	0.070444	600	-7.44435	1	1	0.070444	100	-0.458062	475	1366	-5.62362	500	2	1.33383	3.49e-20	-0.451562	0.0206252
2	14159916	14160416	AT2G33420	+	46	2	14148988	14149488	AT2G33420	+	1189	NA	Yes	10928	7	0.070444	700	-9.74922	1	0	0.070444	0	1.01596	32	1167	1.01596	700	2	NA	NA	-1.70503	3.26e-05
1	3061355	3061855	AT1G09483	+	906	1	3056604	3057104	AT1G09483	+	60	Yes	NA	4751	9	0.070444	900	-14.2	0.186206	2	0.070444	200	-1.33093	798	56	-7.11545	700	-4	NA	NA	NA	NA
1	6852038	6852538	AT1G19830	+	580	1	6839097	6839597	AT1G19830	+	1248	Yes	Yes	12941	7	0.070444	700	-9.42035	1	4	0.070444	400	-3.96972	560	1147	-1.54034	300	2	5.77932	1.56e-08	-1.57659	1.48e-06
1	27265129	27265629	AT1G72430	+	574	1	27261033	27261533	AT1G72430	+	100	Yes	NA	4096	9	0.070444	900	-13.9916	0.218939	4	0.070444	400	-4.00993	496	72	-3.07743	500	4	0.792465	0.0441792	NA	NA
1	27904528	27905028	AT1G74190	+	55	1	27872570	27873070	AT1G74190	+	1490	NA	Yes	31958	6	0.070444	600	-7.62477	1	0	0.070444	0	1.01035	49	1204	1.01035	600	2	NA	NA	NA	NA
1	28691048	28691548	AT1G76470	+	74	1	28682534	28683034	AT1G76470	+	1350	NA	Yes	8514	7	0.070444	700	-9.60933	1	5	0.070444	500	-5.70427	69	1153	-0.957226	200	2	-4.10994	3.55e-07	0.716953	2.18e-06
2	17518461	17518961	AT2G41960	+	134	2	17496529	17497029	AT2G41960	+	903	NA	Yes	21932	7	0.070444	700	-9.51073	1	2	0.070444	200	-1.33091	87	755	-4.17841	500	2	NA	NA	NA	NA
1	4662944	4663444	AT1G13609	+	451	1	4658893	4659393	AT1G13609	+	826	Yes	Yes	4051	17	0.070444	1700	-34.7189	0	12	0.070444	1200	-21.0481	399	854	-1.88221	500	12	6.97821	8.06e-193	NA	NA
1	4662492	4662992	AT1G13609	+	741	1	4660923	4661423	AT1G13609	+	446	Yes	Yes	1569	16	0.070444	1600	-31.851	0	12	0.070444	1200	-21.037	613	433	-1.48982	400	12	6.97821	8.06e-193	NA	NA
1	11530537	11531037	AT1G32050	+	106	1	11512614	11513114	AT1G32050	+	921	NA	Yes	17923	6	0.070444	600	-7.52798	1	0	0.070444	0	1.00655	77	791	1.00655	600	2	NA	NA	NA	NA
1	7434460	7434960	AT1G21240	+	529	1	7424472	7424972	AT1G21240	+	84	Yes	NA	9988	9	0.070444	900	-14.0501	0.210028	2	0.070444	200	-1.33092	493	72	-7.04507	700	-4	NA	NA	-2.57465	1.89e-06
1	29706469	29706969	AT1G78970	+	180	1	29693363	29693863	AT1G78970	+	479	Yes	Yes	13106	6	0.070444	600	-7.48644	1	1	0.070444	100	-0.456449	131	403	-5.65908	500	2	2.42318	2.64e-30	NA	NA
1	30201586	30202086	AT1G80340	+	410	1	30198977	30199477	AT1G80340	+	79	Yes	NA	2609	10	0.070444	1000	-16.4942	0.021174	3	0.070444	300	-2.54029	292	64	-5.84142	700	6	-3.91122	1.08e-08	NA	NA
1	1803017	1803517	AT1G05940	+	1052	1	1799925	1800425	AT1G05940	+	216	Yes	NA	3092	25	0.070444	2500	-60.2998	0	16	0.070444	1600	-32.2462	1023	172	-3.51821	900	22	NA	NA	NA	NA
2	14512468	14512968	AT2G34380	+	242	2	14508323	14508823	AT2G34380	+	812	NA	Yes	4145	24	0.070444	2400	-56.8299	0	8	0.070444	800	-11.5833	228	819	-11.8862	1600	-22	NA	NA	NA	NA
1	27650655	27651155	AT1G73570	+	970	1	27646517	27647017	AT1G73570	+	104	Yes	NA	4138	16	0.070444	1600	-32.6866	0	9	0.070444	900	-14.0111	866	94	-3.39262	700	12	1.46631	4.72e-09	2.05693	5.49e-05
1	10379506	10380006	AT1G29690	+	459	1	10371488	10371988	AT1G29690	+	1268	Yes	Yes	8018	6	0.070444	600	-7.45092	1	1	0.070444	100	-0.457951	402	1081	-5.62604	500	2	0.701512	1.42e-05	3.81595	1.32e-13
1	19044486	19044986	AT1G51360	+	101	1	19029623	19030123	AT1G51360	+	1169	NA	Yes	14863	6	0.070444	600	-7.53304	1	3	0.070444	300	-2.53844	71	1264	-1.70901	300	2	NA	NA	NA	NA
2	167947	168447	AT2G01360	+	1278	2	164057	164557	AT2G01360	+	70	Yes	NA	3890	12	0.070444	1200	-21.7545	0.000144	8	0.070444	800	-11.7136	1296	98	-1.74021	400	8	NA	NA	2.19264	5.23e-07
2	15479957	15480457	AT2G36880	+	112	2	15474429	15474929	AT2G36880	+	1005	NA	Yes	5528	12	0.070444	1200	-21.4233	0.000193	3	0.070444	300	-2.53314	104	1003	-8.43274	900	-8	-1.2689	6.07e-42	3.61417	2.72e-104
1	16999150	16999650	AT1G44960	+	384	1	16994000	16994500	AT1G44960	+	818	Yes	Yes	5150	13	0.070444	1300	-23.6536	2.2e-05	9	0.070444	900	-13.7719	385	942	-1.63638	400	8	-0.676383	1.77e-05	NA	NA
1	24033439	24033939	AT1G64670	+	1404	1	24025574	24026074	AT1G64670	+	100	Yes	NA	7865	8	0.070444	800	-11.7089	1	2	0.070444	200	-1.33091	1090	96	-5.51081	600	4	2.82935	2.17e-10	-0.484874	0.000764506
1	27144506	27145006	AT1G72141	+	71	1	27137860	27138360	AT1G72141	+	820	NA	Yes	6646	8	0.070444	800	-11.8033	1	0	0.070444	0	1.00754	67	663	1.00754	800	4	NA	NA	NA	NA
1	6297407	6297907	AT1G18290	+	898	1	6289474	6289974	AT1G18290	+	42	Yes	NA	7933	12	0.070444	1200	-22.391	7.7e-05	3	0.070444	300	-2.55334	828	38	-9.03234	900	-8	-1.97769	0.0036369	-0.971761	2.08e-06
2	18307492	18307992	AT2G44300	+	1839	2	18287541	18288041	AT2G44300	+	90	Yes	NA	19951	7	0.070444	700	-9.56977	1	2	0.070444	200	-1.33091	1345	82	-4.18335	500	2	-1.67675	9.05e-09	2.17089	1.76e-11
3	67888	68388	AT3G01190	+	130	3	59686	60186	AT3G01190	+	1815	NA	Yes	8202	6	0.070444	600	-7.50923	1	3	0.070444	300	-2.52838	180	1303	-1.69655	300	2	-6.14602	1.92e-36	-5.33745	4.09e-43
1	26725549	26726049	AT1G70890	+	1780	1	26708029	26708529	AT1G70890	+	205	Yes	Yes	17520	8	0.070444	800	-11.5942	1	4	0.070444	400	-3.98348	1646	167	-2.22435	400	4	NA	NA	7.33724	3.3e-150
2	13410001	13410501	AT2G31480	+	225	2	13405498	13405998	AT2G31480	+	2000	Yes	Yes	4503	25	0.070444	2500	-60.2441	0	13	0.070444	1300	-23.7289	270	1887	-5.76365	1200	22	NA	NA	NA	NA
1	9274016	9274516	AT1G26790	+	994	1	9250083	9250583	AT1G26790	+	87	Yes	NA	23933	6	0.070444	600	-7.55039	1	2	0.070444	200	-1.33091	752	94	-2.98157	400	2	NA	NA	6.9942	4.28e-112
1	22810069	22810569	AT1G61770	+	87	1	22805369	22805869	AT1G61770	+	741	NA	Yes	4700	9	0.070444	900	-14.0374	0.211969	3	0.070444	300	-2.53821	72	659	-4.59177	600	4	-0.686114	0.000142985	-5.49538	1.03e-14
1	26396483	26396983	AT1G70080	+	946	1	26388375	26388875	AT1G70080	+	79	Yes	NA	8108	11	0.070444	1100	-19.023	0.001928	3	0.070444	300	-2.53821	848	72	-7.13952	800	-6	NA	NA	NA	NA
2	7564996	7565496	AT2G17420	+	1932	2	7560449	7560949	AT2G17420	+	127	Yes	NA	4547	27	0.070444	2700	-68.2983	0	12	0.070444	1200	-21.588	1749	86	-9.45908	1500	-26	-2.31224	2.4e-37	0.385988	0.0094748
1	2888969	2889469	AT1G08990	+	1709	1	2884962	2885462	AT1G08990	+	213	Yes	NA	4007	49	0.070444	4900	-151.318	0	27	0.070444	2700	-67.4667	1502	177	-10.2372	2200	-58	-5.64644	2.23e-50	3.10032	2.16e-77
2	11205362	11205862	AT2G26320	+	85	2	11201827	11202327	AT2G26320	+	913	NA	Yes	3535	11	0.070444	1100	-18.9778	0.002005	4	0.070444	400	-4.00993	72	833	-5.05708	700	6	NA	NA	-2.04737	3.24e-14
2	13445992	13446492	AT2G31585	+	115	2	13436982	13437482	AT2G31585	+	2021	NA	Yes	9010	14	0.070444	1400	-26.8369	1e-06	7	0.070444	700	-9.61557	72	1796	-3.88049	700	10	-2.69907	3.64e-11	2.82824	3.81e-16
1	10877364	10877864	AT1G30660	+	577	1	10870477	10870977	AT1G30660	+	128	Yes	Yes	6887	9	0.070444	900	-13.9255	0.228804	1	0.070444	100	-0.456593	496	140	-11.6444	800	-4	NA	NA	-4.31343	1.22e-114
1	26335336	26335836	AT1G69920	+	473	1	26330960	26331460	AT1G69920	+	132	Yes	NA	4376	6	0.070444	600	-7.50798	1	1	0.070444	100	-0.456397	412	128	-5.66024	500	2	-3.59504	7.07e-08	1.63813	5.45e-39
1	26153054	26153554	AT1G69550	+	1343	1	26126466	26126966	AT1G69550	+	121	Yes	NA	26588	8	0.070444	800	-11.6696	1	2	0.070444	200	-1.33091	1168	92	-5.51599	600	4	2.52133	7.8e-30	-0.760079	1.56e-07
2	13796683	13797183	AT2G32500	+	1179	2	13777485	13777985	AT2G32500	+	94	Yes	NA	19198	8	0.070444	800	-11.7235	1	2	0.070444	200	-1.33092	942	63	-5.5743	600	4	3.60481	1.4e-51	1.43287	1.18e-13
1	29635374	29635874	AT1G78820	+	1684	1	29629570	29630070	AT1G78820	+	59	Yes	NA	5804	7	0.070444	700	-9.66691	1	2	0.070444	200	-1.33095	1469	47	-4.24932	500	2	7.243	6.03e-262	NA	NA
1	25256415	25256915	AT1G67420	+	808	1	25253424	25253924	AT1G67420	+	210	Yes	NA	2991	16	0.070444	1600	-32.128	0	6	0.070444	600	-7.48056	686	200	-6.77052	1000	12	-1.00395	1.7e-15	-0.666434	2.13e-06
1	2888550	2889050	AT1G08990	+	1794	1	2887040	2887540	AT1G08990	+	166	Yes	NA	1510	43	0.070444	4300	-128.234	0	17	0.070444	1700	-35.6934	1643	103	-18.5169	2600	-50	-5.64644	2.23e-50	NA	NA
1	26230553	26231053	AT1G69730	+	72	1	26199930	26200430	AT1G69730	+	1333	NA	Yes	30623	6	0.070444	600	-7.57672	1	1	0.070444	100	-0.453454	56	1011	-5.72695	500	2	6.98577	4.29e-42	NA	NA
2	14689996	14690496	AT2G34820	+	723	2	14682078	14682578	AT2G34820	+	203	Yes	NA	7918	9	0.070444	900	-13.8398	0.242889	3	0.070444	300	-2.53024	641	140	-4.5111	600	4	NA	NA	NA	NA
1	248018	248518	AT1G01680	+	1178	1	233365	233865	AT1G01680	+	110	Yes	NA	14653	6	0.070444	600	-7.52428	1	1	0.070444	100	-0.454248	992	66	-5.70869	500	2	NA	NA	NA	NA
2	18729526	18730026	AT2G45434	+	177	2	18727600	18728100	AT2G45434	+	551	Yes	Yes	1926	16	0.070444	1600	-32.2276	0	12	0.070444	1200	-21.2216	181	545	-1.50666	400	12	NA	NA	-5.40487	6.7e-56
2	13727360	13727860	AT2G32320	+	224	2	13723505	13724005	AT2G32320	+	921	Yes	Yes	3855	6	0.070444	600	-7.4749	1	3	0.070444	300	-2.52567	311	881	-1.69326	300	2	NA	NA	-3.89783	2.53e-13
1	48941	49441	AT1G01090	+	110	1	39943	40443	AT1G01090	+	899	NA	Yes	8998	6	0.070444	600	-7.52428	1	3	0.070444	300	-2.53282	107	900	-1.702	300	2	1.07598	1.35e-14	-1.30156	0.000168892
1	4261403	4261903	AT1G12490	+	1429	1	4255469	4255969	AT1G12490	+	74	Yes	NA	5934	11	0.070444	1100	-19.0665	0.001855	3	0.070444	300	-2.5426	1307	57	-7.23473	800	-6	NA	NA	NA	NA
2	14456509	14457009	AT2G34230	+	61	2	14450556	14451056	AT2G34230	+	1523	NA	Yes	5953	8	0.070444	800	-11.8577	1	2	0.070444	200	-1.33092	68	1195	-5.56051	600	4	NA	NA	-1.5195	0.000722897
2	14518546	14519046	AT2G34410	+	110	2	14511450	14511950	AT2G34410	+	1316	NA	Yes	7096	6	0.070444	600	-7.52428	1	4	0.070444	400	-4.00321	84	1226	-0.991218	200	2	-0.753874	1.36e-06	NA	NA
2	6501180	6501680	AT2G15025	+	1312	2	6484517	6485017	AT2G15025	+	43	Yes	NA	16663	8	0.070444	800	-12.025	1	3	0.070444	300	-2.54659	1370	48	-3.54977	500	4	NA	NA	NA	NA
2	16234520	16235020	AT2G38860	+	1836	2	16225990	16226490	AT2G38860	+	182	Yes	NA	8530	12	0.070444	1200	-21.2198	0.000229	5	0.070444	500	-5.6543	1528	145	-4.41024	700	8	-2.15809	6.36e-11	NA	NA
1	10194410	10194910	AT1G29170	+	1562	1	10174347	10174847	AT1G29170	+	128	Yes	NA	20063	6	0.070444	600	-7.51052	1	5	0.070444	500	-5.66803	1333	111	-0.573481	100	2	NA	NA	0.661774	1.42e-11
3	846042	846542	AT3G03540	+	203	3	844179	844679	AT3G03540	+	564	NA	Yes	1863	17	0.070444	1700	-35.0601	0	11	0.070444	1100	-18.7073	160	481	-2.46482	600	12	NA	NA	-2.80443	4.83e-23
3	80444	80944	AT3G01260	+	115	3	72881	73381	AT3G01260	+	777	NA	Yes	7563	6	0.070444	600	-7.52001	1	2	0.070444	200	-1.33091	79	662	-2.98896	400	2	-5.71204	5.73e-40	0.695048	0.000408174
1	2984869	2985369	AT1G09240	+	810	1	2981419	2981919	AT1G09240	+	36	Yes	NA	3450	6	0.070444	600	-7.73621	1	2	0.070444	200	-1.33096	738	41	-3.03356	400	2	6.94794	8.81e-24	0.849011	3.18e-07
1	28506530	28507030	AT1G75920	+	68	1	28502056	28502556	AT1G75920	+	1385	NA	Yes	4474	16	0.070444	1600	-33.3122	0	7	0.070444	700	-9.59257	80	1275	-5.59356	900	12	NA	NA	NA	NA
1	6229940	6230440	AT1G18100	+	329	1	6224963	6225463	AT1G18100	+	1259	Yes	Yes	4977	19	0.070444	1900	-40.7651	0	5	0.070444	500	-5.63278	282	1210	-12.4194	1400	-16	-5.33591	9.19e-35	1.16819	0.0020121
2	12769495	12769995	AT2G29960	+	152	2	12760014	12760514	AT2G29960	+	874	NA	Yes	9481	10	0.070444	1000	-16.2555	0.025476	3	0.070444	300	-2.53068	133	751	-5.69649	700	6	-0.534025	0.00022292	5.6035	1.67e-69
1	24040530	24041030	AT1G64700	+	595	1	24029933	24030433	AT1G64700	+	304	Yes	Yes	10597	6	0.070444	600	-7.46254	1	1	0.070444	100	-0.457857	502	356	-5.62809	500	2	-0.814391	0.0279958	-1.45773	0.00873002
1	6496001	6496501	AT1G18835	+	1297	1	6483103	6483603	AT1G18835	+	129	Yes	NA	12898	8	0.070444	800	-11.6581	1	4	0.070444	400	-3.99434	1252	108	-2.23757	400	4	NA	NA	-0.472452	0.0017042
1	6240407	6240907	AT1G18140	+	669	1	6238014	6238514	AT1G18140	+	92	Yes	NA	2393	8	0.070444	800	-11.7288	1	4	0.070444	400	-4.00804	546	75	-2.25462	400	4	-3.57713	1.8e-09	NA	NA
2	7913878	7914378	AT2G18190	+	684	2	7888525	7889025	AT2G18190	+	1669	Yes	Yes	25353	6	0.070444	600	-7.44346	1	2	0.070444	200	-1.33089	571	1518	-2.95006	400	2	NA	NA	NA	NA
1	21384570	21385070	AT1G57750	+	721	1	21378409	21378909	AT1G57750	+	142	Yes	NA	6161	10	0.070444	1000	-16.2733	0.025126	3	0.070444	300	-2.53081	649	131	-5.69846	700	6	NA	NA	NA	NA
2	14557584	14558084	AT2G34555	+	1908	2	14540375	14540875	AT2G34555	+	89	Yes	NA	17209	9	0.070444	900	-14.0295	0.213145	2	0.070444	200	-1.33092	1791	72	-7.04507	700	-4	NA	NA	-4.34388	6.36e-13
1	22920447	22920947	AT1G62020	+	613	1	22916447	22916947	AT1G62020	+	56	Yes	NA	4000	12	0.070444	1200	-21.9856	0.000115	4	0.070444	400	-4.03233	719	49	-6.38446	800	8	-0.518815	1.26e-10	NA	NA
2	13434418	13434918	AT2G31550	+	1215	2	13414019	13414519	AT2G31550	+	113	Yes	NA	20399	7	0.070444	700	-9.53302	1	5	0.070444	500	-5.66064	1203	127	-0.957072	200	2	NA	NA	NA	NA
1	25833446	25833946	AT1G68780	+	1708	1	25808409	25808909	AT1G68780	+	93	Yes	NA	25037	6	0.070444	600	-7.5423	1	2	0.070444	200	-1.33091	1305	78	-2.98956	400	2	7.49873	9.08e-73	0.457069	0.00931986
2	7195937	7196437	AT2G16592	+	78	2	7191556	7192056	AT2G16592	+	1096	NA	Yes	4381	14	0.070444	1400	-27.2008	1e-06	7	0.070444	700	-9.64054	65	929	-3.91374	700	10	NA	NA	NA	NA
2	15080491	15080991	AT2G35920	+	91	2	15068864	15069364	AT2G35920	+	1430	NA	Yes	11627	6	0.070444	600	-7.54487	1	2	0.070444	200	-1.33092	67	1571	-2.99735	400	2	-0.700806	9.01e-08	-5.44029	7.67e-17
1	3233987	3234487	AT1G09935	+	118	1	3223971	3224471	AT1G09935	+	1406	NA	Yes	10016	8	0.070444	800	-11.6743	1	2	0.070444	200	-1.3309	105	1410	-5.50066	600	4	NA	NA	0.411279	9.99e-06
2	17790955	17791455	AT2G42730	+	1297	2	17785474	17785974	AT2G42730	+	1067	Yes	Yes	5481	37	0.07157	3641.77	-100.902	0	21	0.070444	2100	-46.5276	1297	990	-6.43309	1541.77	38	NA	NA	-3.40242	1.37e-07
2	17110556	17111056	AT2G41997	+	635	2	17106096	17106596	AT2G41997	+	1127	Yes	Yes	4460	40	0.070444	4000	-112.49	0	19	0.070444	1900	-40.5541	585	1120	-10.5256	2100	-44	NA	NA	NA	NA
2	19220470	19220970	AT2G46770	+	133	2	19207303	19207803	AT2G46770	+	1005	NA	Yes	13167	6	0.070444	600	-7.50737	1	5	0.070444	500	-5.68706	84	1026	-0.571093	100	2	NA	NA	-4.53993	4.61e-24
2	13420977	13421477	AT2G31510	+	157	2	13408463	13408963	AT2G31510	+	1041	NA	Yes	12514	7	0.070444	700	-9.49328	1	3	0.070444	300	-2.53233	112	1079	-2.51118	400	2	0.256547	0.00992799	NA	NA
1	26964417	26964917	AT1G71695	+	1044	1	26948551	26949051	AT1G71695	+	207	Yes	NA	15866	8	0.070444	800	-11.5931	1	6	0.070444	600	-7.48454	860	186	-0.93221	200	4	3.41473	8.33e-60	NA	NA
2	10431619	10432119	AT2G24560	+	880	2	10421980	10422480	AT2G24560	+	79	Yes	NA	9639	11	0.070444	1100	-19.023	0.001928	4	0.070444	400	-4.00576	850	79	-5.03368	700	6	NA	NA	NA	NA
1	26964091	26964591	AT1G71695	+	1304	1	26950476	26950976	AT1G71695	+	98	Yes	NA	13615	6	0.070444	600	-7.53633	1	5	0.070444	500	-5.69654	1013	75	-0.569901	100	2	3.41473	8.33e-60	NA	NA
1	24594510	24595010	AT1G66060	+	573	1	24585908	24586408	AT1G66060	+	1093	NA	Yes	8602	9	0.070444	900	-13.7474	0.260833	6	0.070444	600	-7.44456	638	969	-1.36505	300	4	2.21411	0.00120448	NA	NA
1	26964049	26964549	AT1G71695	+	1304	1	26953418	26953918	AT1G71695	+	111	Yes	NA	10631	9	0.070444	900	-13.9615	0.223441	3	0.070444	300	-2.53262	1013	109	-4.53487	600	4	3.41473	8.33e-60	-5.13478	5.8e-47
1	21924219	21924719	AT1G59660	+	705	1	21920491	21920991	AT1G59660	+	209	Yes	NA	3728	16	0.070444	1600	-32.1305	0	3	0.070444	300	-2.52868	609	172	-14.6224	1300	-12	-0.790388	1.35e-06	-0.441255	0.00178483
1	23844622	23845122	AT1G64255	+	1814	1	23832077	23832577	AT1G64255	+	62	Yes	NA	12545	6	0.070444	600	-7.60166	1	2	0.070444	200	-1.33091	1440	76	-2.9908	400	2	NA	NA	-3.62332	7.48e-19
1	26407143	26407643	AT1G70110	+	1234	1	26392094	26392594	AT1G70110	+	83	Yes	NA	15049	6	0.070444	600	-7.55645	1	0	0.070444	0	1.01014	967	50	1.01014	600	2	NA	NA	2.70857	3.77e-59
1	3061409	3061909	AT1G09483	+	906	1	3057884	3058384	AT1G09483	+	153	Yes	NA	3525	7	0.070444	700	-9.49593	1	1	0.070444	100	-0.455537	798	93	-7.5423	600	-2	NA	NA	-1.03865	0.0197612
1	23633505	23634005	AT1G63710	+	133	1	23614533	23615033	AT1G63710	+	1614	NA	Yes	18972	6	0.070444	600	-7.50737	1	2	0.070444	200	-1.3309	111	1523	-2.97568	400	2	3.85298	2.35e-06	2.1367	7.1e-43
2	609495	609995	AT2G02310	+	106	2	604402	604902	AT2G02310	+	1112	NA	Yes	5093	31	0.070444	3100	-83.6616	0	20	0.070444	2000	-45.1579	99	1189	-4.49611	1100	32	-7.10413	4.2e-10	NA	NA
2	12443574	12444074	AT2G28970	+	559	2	12440012	12440512	AT2G28970	+	158	Yes	NA	3562	13	0.070444	1300	-23.9121	1.8e-05	2	0.070444	200	-1.33091	599	99	-13.9926	1100	-8	-5.31659	4.19e-130	-5.37377	2.41e-45
1	19746525	19747025	AT1G53000	+	162	1	19743054	19743554	AT1G53000	+	660	NA	Yes	3471	15	0.070444	1500	-29.4194	0	8	0.070444	800	-11.6422	142	822	-3.50668	700	10	NA	NA	NA	NA
1	490019	490519	AT1G02405	+	89	1	486957	487457	AT1G02405	+	1749	NA	Yes	3062	23	0.070444	2300	-55.4388	0	14	0.070444	1400	-27.2805	73	1418	-4.11094	900	20	NA	NA	NA	NA
2	11261483	11261983	AT2G26470	+	150	2	11258628	11259128	AT2G26470	+	714	NA	Yes	2855	23	0.070444	2300	-54.198	0	13	0.070444	1300	-24.0504	121	610	-4.64415	1000	20	0.511916	0.000274812	NA	NA
2	17515465	17515965	AT2G41960	+	123	2	17499469	17499969	AT2G41960	+	1761	NA	Yes	15996	10	0.070444	1000	-16.3153	0.024343	1	0.070444	100	-0.455281	86	1719	-14.0416	900	-6	NA	NA	NA	NA
1	24418133	24418633	AT1G65660	+	147	1	24412536	24413036	AT1G65660	+	796	NA	Yes	5597	6	0.070444	600	-7.49971	1	3	0.070444	300	-2.53132	124	844	-1.70014	300	2	0.661344	2.53e-08	NA	NA
3	405059	405559	AT3G02180	+	95	3	395119	395619	AT3G02180	+	654	NA	Yes	9940	10	0.070444	1000	-16.4092	0.02266	2	0.070444	200	-1.33092	63	627	-8.71433	800	-6	1.11299	2.4e-24	0.485271	0.013554
1	11528576	11529076	AT1G32050	+	96	1	11515358	11515858	AT1G32050	+	901	NA	Yes	13218	6	0.070444	600	-7.53864	1	4	0.070444	400	-3.99973	92	1054	-0.9912	200	2	NA	NA	NA	NA
1	29702942	29703442	AT1G78970	+	1091	1	29700009	29700509	AT1G78970	+	138	Yes	NA	2933	18	0.070444	1800	-38.3799	0	7	0.070444	700	-9.5356	877	111	-7.42153	1100	-14	2.42318	2.64e-30	-0.609974	6.89e-07
2	17240009	17240509	AT2G41370	+	718	2	17228896	17229396	AT2G41370	+	1815	Yes	Yes	11113	12	0.070444	1200	-20.9853	0.000281	5	0.070444	500	-5.6196	680	1611	-4.31528	700	8	NA	NA	7.1078	6.04e-44
1	10571951	10572451	AT1G30100	+	117	1	10552467	10552967	AT1G30100	+	975	NA	Yes	19484	8	0.070444	800	-11.676	1	5	0.070444	500	-5.66699	113	1037	-1.45053	300	4	NA	NA	-4.68793	4.54e-32
1	4934104	4934604	AT1G14430	+	2034	1	4925428	4925928	AT1G14430	+	83	Yes	NA	8676	13	0.070444	1300	-24.3289	1.2e-05	7	0.070444	700	-9.56977	1690	90	-3.07545	600	8	3.63616	2.93e-34	-2.14853	6.85e-10
2	17990071	17990571	AT2G43280	+	1270	2	17984558	17985058	AT2G43280	+	168	Yes	NA	5513	12	0.070444	1200	-21.2466	0.000224	8	0.070444	800	-11.6554	1127	131	-1.72731	400	8	0.639213	0.000116034	0.285648	0.0347227
2	17990055	17990555	AT2G43280	+	1270	2	17986138	17986638	AT2G43280	+	490	Yes	Yes	3917	22	0.070444	2200	-49.8633	0	14	0.070444	1400	-26.3381	1127	369	-3.10931	800	18	0.639213	0.000116034	NA	NA
1	19306019	19306519	AT1G51950	+	96	1	19293970	19294470	AT1G51950	+	1547	NA	Yes	12049	9	0.070444	900	-14.0044	0.216962	6	0.070444	600	-7.56677	77	1695	-1.38531	300	4	1.58384	4.1e-11	NA	NA
1	27134002	27134502	AT1G72125	+	1701	1	27123467	27123967	AT1G72125	+	941	Yes	NA	10535	10	0.082779	850.983	-16.0487	0.030054	2	0.070444	200	-1.33089	1733	727	-6.8371	650.983	6	-5.48726	1.05e-37	0.644714	0.000559775
2	13910029	13910529	AT2G32795	+	1153	2	13878111	13878611	AT2G32795	+	132	Yes	NA	31918	6	0.070444	600	-7.50798	1	0	0.070444	0	1.00536	1249	94	1.00536	600	2	2.7413	5.12e-18	NA	NA
2	14513954	14514454	AT2G34380	+	146	2	14511396	14511896	AT2G34380	+	1316	NA	Yes	2558	29	0.070444	2900	-75.0157	0	14	0.070444	1400	-26.751	130	1226	-8.2238	1500	-28	NA	NA	NA	NA
1	22390539	22391039	AT1G60810	+	93	1	22374853	22375353	AT1G60810	+	1024	NA	Yes	15686	6	0.070444	600	-7.5423	1	4	0.070444	400	-4.00054	90	973	-0.991204	200	2	-0.896524	1.36e-28	NA	NA
1	1648373	1648873	AT1G05570	+	67	1	1639506	1640006	AT1G05570	+	1667	NA	Yes	8867	7	0.070444	700	-9.63285	1	3	0.070444	300	-2.53844	71	1338	-2.53142	400	2	-2.51135	3.67e-35	1.91112	7.69e-06
3	278942	279442	AT3G01780	+	179	3	273067	273567	AT3G01780	+	651	NA	Yes	5875	11	0.070444	1100	-18.6756	0.002569	2	0.070444	200	-1.3309	158	645	-10.1633	900	-6	NA	NA	-5.26206	2.95e-17
1	10380574	10381074	AT1G29690	+	252	1	10375332	10375832	AT1G29690	+	1518	Yes	Yes	5242	13	0.070444	1300	-23.7472	2e-05	3	0.070444	300	-2.52679	239	1372	-9.70662	1000	-8	0.701512	1.42e-05	5.64257	9.46e-150
1	19286897	19287397	AT1G51910	+	414	1	19278437	19278937	AT1G51910	+	792	Yes	Yes	8460	8	0.070444	800	-11.5403	1	1	0.070444	100	-0.458037	456	784	-9.42763	700	-4	NA	NA	-2.8958	4.27e-14
2	168000	168500	AT2G01360	+	1278	2	166512	167012	AT2G01360	+	158	Yes	NA	1488	26	0.070444	2600	-64.2457	0	18	0.070444	1800	-38.5449	1296	120	-2.9412	800	24	NA	NA	NA	NA
2	15973114	15973614	AT2G38120	+	64	2	15954914	15955414	AT2G38120	+	1546	NA	Yes	18200	6	0.070444	600	-7.59602	1	4	0.070444	400	-4.02578	54	1474	-0.991374	200	2	NA	NA	-1.24026	0.0010289
1	3874434	3874934	AT1G11530	+	472	1	3869531	3870031	AT1G11530	+	1048	Yes	Yes	4903	13	0.070444	1300	-23.6206	2.3e-05	9	0.070444	900	-13.7617	446	1220	-1.63474	400	8	NA	NA	-2.32697	3.07e-05
1	7901961	7902461	AT1G22380	+	1977	1	7892018	7892518	AT1G22380	+	97	Yes	NA	9943	10	0.070444	1000	-16.4006	0.022817	5	0.070444	500	-5.67518	1742	99	-2.76402	500	6	NA	NA	NA	NA
1	6297913	6298413	AT1G18290	+	266	1	6294955	6295455	AT1G18290	+	278	Yes	Yes	2958	9	0.070444	900	-13.8057	0.249354	2	0.070444	200	-1.33089	234	283	-6.88349	700	4	-1.97769	0.0036369	NA	NA
2	18307526	18308026	AT2G44300	+	1839	2	18291490	18291990	AT2G44300	+	84	Yes	NA	16036	6	0.070444	600	-7.55488	1	3	0.070444	300	-2.53656	1345	80	-1.70664	300	2	-1.67675	9.05e-09	NA	NA
1	3883547	3884047	AT1G11570	+	1556	1	3874504	3875004	AT1G11570	+	472	Yes	Yes	9043	7	0.070444	700	-9.42647	1	6	0.070444	600	-7.45158	1345	446	-0.588051	100	2	NA	NA	NA	NA
1	26726088	26726588	AT1G70890	+	1490	1	26709990	26710490	AT1G70890	+	630	Yes	Yes	16098	8	0.070444	800	-11.5224	1	4	0.070444	400	-3.9696	1272	572	-2.2078	400	4	NA	NA	2.86715	4.83e-06
1	25651122	25651622	AT1G68410	+	66	1	25647828	25648328	AT1G68410	+	546	NA	Yes	3294	9	0.070444	900	-14.1517	0.193953	4	0.070444	400	-4.01669	63	377	-3.09356	500	4	NA	NA	1.75675	1.58e-23
2	16631446	16631946	AT2G39850	+	687	2	16615109	16615609	AT2G39850	+	107	Yes	NA	16337	6	0.070444	600	-7.52703	1	2	0.070444	200	-1.33091	593	102	-2.97855	400	2	6.7857	1.42e-36	0.270906	0.0129744
1	9274499	9274999	AT1G26790	+	847	1	9263136	9263636	AT1G26790	+	54	Yes	Yes	11363	7	0.070444	700	-9.69361	1	1	0.070444	100	-0.45153	736	41	-7.69621	600	-2	NA	NA	NA	NA
2	7669104	7669604	AT2G17640	+	960	2	7656007	7656507	AT2G17640	+	53	Yes	NA	13097	6	0.070444	600	-7.63255	1	3	0.070444	300	-2.54829	735	45	-1.72164	300	2	NA	NA	NA	NA
1	9274085	9274585	AT1G26790	+	994	1	9264471	9264971	AT1G26790	+	84	Yes	Yes	9614	8	0.070444	800	-11.7526	1	3	0.070444	300	-2.53476	752	91	-3.47375	500	4	NA	NA	NA	NA
1	26396545	26397045	AT1G70080	+	946	1	26392936	26393436	AT1G70080	+	72	Yes	NA	3609	7	0.070444	700	-9.61557	1	5	0.070444	500	-5.75353	848	46	-0.957515	200	2	NA	NA	2.70857	3.77e-59
1	5295040	5295540	AT1G15390	+	95	1	5292162	5292662	AT1G15390	+	765	NA	Yes	2878	10	0.070444	1000	-16.4092	0.02266	5	0.070444	500	-5.70717	67	676	-2.80437	500	6	1.00744	7.07e-16	-3.89803	3.12e-15
3	1221530	1222030	AT3G04530	+	501	3	1219489	1219989	AT3G04530	+	1015	Yes	Yes	2041	37	0.070444	3700	-101.596	0	19	0.070444	1900	-40.6522	429	906	-8.37923	1800	-38	-4.83185	4.27e-40	0.958505	0.0118971
1	24359402	24359902	AT1G65510	+	1225	1	24358101	24358601	AT1G65510	+	492	Yes	Yes	1301	23	0.070444	2300	-53.0426	0	14	0.070444	1400	-26.3423	1026	362	-3.63933	900	20	-2.181	5.82e-07	2.97879	1.98e-06
1	29502983	29503483	AT1G78410	+	139	1	29487627	29488127	AT1G78410	+	1031	NA	Yes	15356	6	0.070444	600	-7.50389	1	0	0.070444	0	1.00615	82	916	1.00615	600	2	NA	NA	-0.608156	0.00376162
1	10672121	10672621	AT1G30290	+	121	1	10651026	10651526	AT1G30290	+	1304	NA	Yes	21095	6	0.070444	600	-7.51537	1	3	0.070444	300	-2.53776	74	1147	-1.70816	300	2	NA	NA	NA	NA
3	345052	345552	AT3G02030	+	192	3	343470	343970	AT3G02030	+	1702	NA	Yes	1582	31	0.070444	3100	-81.4677	0	18	0.070444	1800	-38.1283	180	1660	-5.58153	1300	32	NA	NA	1.94387	6.1e-05
1	26153107	26153607	AT1G69550	+	1343	1	26127996	26128496	AT1G69550	+	153	Yes	NA	25111	10	0.070444	1000	-16.2539	0.02551	2	0.070444	200	-1.3309	1168	104	-8.56292	800	-6	2.52133	7.8e-30	NA	NA
3	1221492	1221992	AT3G04530	+	501	3	1219977	1220477	AT3G04530	+	571	Yes	Yes	1515	18	0.070444	1800	-37.6175	0	14	0.070444	1400	-26.3076	429	659	-1.4222	400	14	-4.83185	4.27e-40	NA	NA
1	26152377	26152877	AT1G69550	+	1031	1	26130380	26130880	AT1G69550	+	83	Yes	NA	21997	8	0.070444	800	-11.7559	1	4	0.070444	400	-4.01669	794	63	-2.2656	400	4	2.52133	7.8e-30	4.18939	2.61e-20
1	25028409	25028909	AT1G67050	+	83	1	25012101	25012601	AT1G67050	+	924	NA	Yes	16308	6	0.070444	600	-7.55645	1	2	0.070444	200	-1.33092	73	991	-2.99279	400	2	1.4811	3.58e-12	-2.30215	0.00105409
1	247547	248047	AT1G01680	+	1047	1	241561	242061	AT1G01680	+	827	Yes	Yes	5986	22	0.070444	2200	-49.6837	0	11	0.070444	1100	-18.4762	986	757	-5.4322	1100	18	NA	NA	-2.55323	1.97e-07
2	14690030	14690530	AT2G34820	+	723	2	14686458	14686958	AT2G34820	+	290	Yes	Yes	3572	13	0.070444	1300	-23.7114	2.1e-05	5	0.070444	500	-5.63216	641	290	-5.29166	800	8	NA	NA	1.52427	1.5e-17
2	6306986	6307486	AT2G14740	+	36	2	6293323	6293823	AT2G14740	+	1178	NA	Yes	13663	7	0.070444	700	-9.85655	1	3	0.070444	300	-2.54607	49	1037	-2.55738	400	2	NA	NA	NA	NA
2	121393	121893	AT2G01210	+	1313	2	118046	118546	AT2G01210	+	172	Yes	NA	3347	29	0.070444	2900	-74.5655	0	20	0.070444	2000	-44.5789	1193	140	-3.23222	900	28	-0.780532	4.03e-06	NA	NA
2	13727055	13727555	AT2G32320	+	1828	2	13724063	13724563	AT2G32320	+	339	Yes	NA	2992	23	0.070444	2300	-53.2639	0	6	0.070444	600	-7.46733	1296	267	-15.2339	1700	-20	NA	NA	NA	NA
1	26153356	26153856	AT1G69550	+	1436	1	26132424	26132924	AT1G69550	+	225	Yes	NA	20932	12	0.070444	1200	-21.159	0.000241	4	0.070444	400	-3.99036	1231	124	-6.05354	800	8	2.52133	7.8e-30	-2.9786	5.62e-13
1	4261459	4261959	AT1G12490	+	1429	1	4257525	4258025	AT1G12490	+	85	Yes	NA	3934	22	0.070444	2200	-52.1647	0	14	0.070444	1400	-27.2158	1307	77	-3.44433	800	20	NA	NA	6.9307	5.92e-21
1	23382532	23383032	AT1G63057	+	155	1	23377939	23378439	AT1G63057	+	264	Yes	Yes	4593	7	0.070444	700	-9.49459	1	2	0.070444	200	-1.3309	127	231	-4.15328	500	2	NA	NA	-0.707214	6.27e-05
1	47614	48114	AT1G01090	+	70	1	46857	47357	AT1G01090	+	488	NA	Yes	757	20	0.070444	2000	-46.0286	0	9	0.070444	900	-14.1913	61	383	-7.00446	1100	-18	1.07598	1.35e-14	4.00667	6.04e-302
2	6501163	6501663	AT2G15025	+	1312	2	6492932	6493432	AT2G15025	+	65	Yes	NA	8231	13	0.070444	1300	-24.5842	1e-05	3	0.070444	300	-2.54659	1370	48	-10.428	1000	-8	NA	NA	7.46039	9.6e-31
1	18220988	18221488	AT1G49250	+	911	1	18217488	18217988	AT1G49250	+	161	Yes	NA	3500	7	0.070444	700	-9.49077	1	3	0.070444	300	-2.53074	917	132	-2.50599	400	2	NA	NA	-1.63266	3.31e-06
1	28217471	28217971	AT1G75180	+	226	1	28194895	28195395	AT1G75180	+	1680	Yes	Yes	22576	7	0.070444	700	-9.46252	1	2	0.070444	200	-1.33089	297	1395	-4.12278	500	2	1.83352	1.74e-72	1.27083	2.06e-06
2	16234956	16235456	AT2G38860	+	2000	2	16232018	16232518	AT2G38860	+	168	Yes	Yes	2938	25	0.070444	2500	-60.7034	0	15	0.070444	1500	-29.5051	1819	142	-4.26652	1000	22	-2.15809	6.36e-11	-0.551105	3.02e-10
3	80500	81000	AT3G01260	+	115	3	74474	74974	AT3G01260	+	1143	NA	Yes	6026	19	0.070444	1900	-41.7092	0	5	0.070444	500	-5.69205	79	944	-13.2721	1400	-16	-5.71204	5.73e-40	-3.46012	3.02e-49
1	9389400	9389900	AT1G27040	+	798	1	9381493	9381993	AT1G27040	+	64	Yes	NA	7907	7	0.070444	700	-9.64458	1	1	0.070444	100	-0.453358	777	55	-7.62477	600	-2	NA	NA	-2.50879	4.72e-29
1	24932073	24932573	AT1G66830	+	209	1	24906962	24907462	AT1G66830	+	1394	NA	Yes	25111	8	0.070444	800	-11.5921	1	5	0.070444	500	-5.64545	181	1385	-1.44501	300	4	1.91995	0.00210852	NA	NA
1	20055159	20055659	AT1G53710	+	807	1	20051046	20051546	AT1G53710	+	242	Yes	NA	4113	24	0.070444	2400	-56.8299	0	8	0.070444	800	-11.5997	815	195	-11.9772	1600	-22	-0.712622	3.77e-13	NA	NA
2	7051077	7051577	AT2G16280	+	96	2	7037992	7038492	AT2G16280	+	1183	NA	Yes	13085	6	0.070444	600	-7.53864	1	4	0.070444	400	-4.00804	75	1331	-0.991246	200	2	1.79867	3.52e-14	-5.31004	1.07e-18
2	8060093	8060593	AT2G18560	+	110	2	8051095	8051595	AT2G18560	+	1322	NA	Yes	8998	11	0.070444	1100	-18.845	0.002239	4	0.070444	400	-3.99246	115	1027	-4.96067	700	6	0.854374	0.00313307	NA	NA
2	12770425	12770925	AT2G29960	+	103	2	12768040	12768540	AT2G29960	+	661	NA	Yes	2385	14	0.070444	1400	-26.9247	1e-06	3	0.070444	300	-2.53348	101	595	-11.5203	1100	-10	-0.534025	0.00022292	NA	NA
1	24791033	24791533	AT1G66460	+	1590	1	24754068	24754568	AT1G66460	+	632	Yes	Yes	36965	6	0.070444	600	-7.44471	1	0	0.070444	0	1.00079	1495	637	1.00079	600	2	-0.972489	0.0392158	NA	NA
2	17969041	17969541	AT2G43235	+	18	2	17964583	17965083	AT2G43235	+	2023	NA	Yes	4458	6	0.070444	600	-8.09519	1	0	0	0	0	0	0	0	600	2	1.20363	4.84e-09	NA	NA
1	18220991	18221491	AT1G49250	+	911	1	18218651	18219151	AT1G49250	+	160	Yes	NA	2340	20	0.070444	2000	-44.4095	0	9	0.070444	900	-13.9039	917	141	-6.39508	1100	16	NA	NA	NA	NA
1	21385453	21385953	AT1G57750	+	879	1	21380488	21380988	AT1G57750	+	399	Yes	Yes	4965	17	0.070444	1700	-34.7547	0	11	0.070444	1100	-18.5246	892	422	-2.41031	600	12	NA	NA	NA	NA
2	14557838	14558338	AT2G34555	+	1186	2	14543969	14544469	AT2G34555	+	61	Yes	NA	13869	7	0.070444	700	-9.65752	1	2	0.070444	200	-1.33093	1011	53	-4.23144	500	2	NA	NA	3.03113	4.53e-13
2	7915439	7915939	AT2G18190	+	832	2	7892532	7893032	AT2G18190	+	823	Yes	Yes	22907	11	0.070444	1100	-18.4714	0.003054	4	0.070444	400	-3.96803	791	814	-4.83263	700	6	NA	NA	-4.99992	4.9e-41
2	8698075	8698575	AT2G20150	+	1811	2	8684001	8684501	AT2G20150	+	81	Yes	NA	14074	6	0.070444	600	-7.55971	1	2	0.070444	200	-1.33091	1667	75	-2.99145	400	2	NA	NA	NA	NA
1	3824895	3825395	AT1G11362	+	878	1	3819002	3819502	AT1G11362	+	81	Yes	NA	5893	10	0.070444	1000	-16.4816	0.021388	3	0.070444	300	-2.54154	732	60	-5.86093	700	6	NA	NA	3.0341	7.01e-71
1	20090451	20090951	AT1G53815	+	1159	1	20084480	20084980	AT1G53815	+	163	Yes	Yes	5971	22	0.070444	2200	-50.7843	0	13	0.070444	1300	-23.9457	1299	147	-3.93117	900	18	NA	NA	2.35007	7.35e-30
2	13420956	13421456	AT2G31510	+	157	2	13410415	13410915	AT2G31510	+	1391	NA	Yes	10541	6	0.070444	600	-7.49509	1	2	0.070444	200	-1.3309	112	1490	-2.97539	400	2	0.256547	0.00992799	NA	NA
2	19220578	19221078	AT2G46770	+	133	2	19209574	19210074	AT2G46770	+	1366	NA	Yes	11004	6	0.070444	600	-7.50737	1	1	0.070444	100	-0.4552	84	1352	-5.68706	500	2	NA	NA	-5.48863	2.85e-43
1	2129017	2129517	AT1G06930	+	66	1	2125058	2125558	AT1G06930	+	902	NA	Yes	3959	15	0.070444	1500	-30.35	0	4	0.070444	400	-4.05311	38	680	-10.9918	1100	-10	-4.53729	6.64e-24	NA	NA
1	23028992	23029492	AT1G62305	+	100	1	22998886	22999386	AT1G62305	+	1976	NA	Yes	30106	7	0.070444	700	-9.55165	1	2	0.070444	200	-1.33091	97	1763	-4.17012	500	2	-0.56032	0.000302635	-0.578347	0.00600263
2	17075014	17075514	AT2G40925	+	120	2	17065433	17065933	AT2G40925	+	1732	NA	Yes	9581	6	0.070444	600	-7.51611	1	3	0.070444	300	-2.53336	102	1425	-1.70266	300	2	NA	NA	-2.33754	1.61e-11
1	26416960	26417460	AT1G70150	+	235	1	26407196	26407696	AT1G70150	+	1234	NA	Yes	9764	6	0.070444	600	-7.47269	1	1	0.070444	100	-0.457435	235	967	-5.63731	500	2	NA	NA	NA	NA
1	24016509	24017009	AT1G64625	+	135	1	24007407	24007907	AT1G64625	+	1300	NA	Yes	9102	9	0.070444	900	-13.9133	0.230676	5	0.070444	500	-5.68265	89	1284	-2.06149	400	4	0.834525	0.00625649	NA	NA
2	10431598	10432098	AT2G24560	+	880	2	10425591	10426091	AT2G24560	+	67	Yes	NA	6007	6	0.070444	600	-7.58823	1	4	0.070444	400	-4.02578	850	54	-0.991374	200	2	NA	NA	NA	NA
1	26407134	26407634	AT1G70110	+	1234	1	26395036	26395536	AT1G70110	+	118	Yes	Yes	12098	7	0.070444	700	-9.52698	1	1	0.070444	100	-0.455635	967	96	-7.53864	600	-2	NA	NA	NA	NA
1	23633480	23633980	AT1G63710	+	133	1	23618042	23618542	AT1G63710	+	756	NA	Yes	15438	7	0.070444	700	-9.51163	1	4	0.070444	400	-3.9935	111	714	-1.55137	300	2	3.85298	2.35e-06	0.474601	1.51e-06
2	17499543	17500043	AT2G41920	+	1761	2	17480000	17480500	AT2G41920	+	103	Yes	NA	19543	6	0.070444	600	-7.53096	1	3	0.070444	300	-2.53448	1719	93	-1.70406	300	2	NA	NA	NA	NA
1	20454584	20455084	AT1G54850	+	71	1	20451880	20452380	AT1G54850	+	853	NA	Yes	2704	12	0.070444	1200	-21.7417	0.000145	4	0.070444	400	-4.00419	82	803	-6.15829	800	8	0.360205	0.0344702	NA	NA
2	13017563	13018063	AT2G30560	+	593	2	13009446	13009946	AT2G30560	+	222	Yes	NA	8117	8	0.070444	800	-11.5859	1	4	0.070444	400	-3.98435	750	160	-2.22539	400	4	NA	NA	NA	NA
2	17515046	17515546	AT2G41960	+	121	2	17501994	17502494	AT2G41960	+	1758	NA	Yes	13052	16	0.070444	1600	-32.5276	0	2	0.070444	200	-1.33091	86	1656	-20.358	1400	-12	NA	NA	NA	NA
2	18166588	18167088	AT2G43870	+	141	2	18161135	18161635	AT2G43870	+	827	NA	Yes	5453	13	0.070444	1300	-23.9663	1.7e-05	3	0.070444	300	-2.53233	112	726	-9.89699	1000	-8	-3.30174	2.01e-31	-0.676514	1.66e-06
2	17239569	17240069	AT2G41370	+	1090	2	17231129	17231629	AT2G41370	+	188	Yes	NA	8440	9	0.070444	900	-13.8514	0.240886	5	0.070444	500	-5.64469	1075	185	-2.03642	400	4	NA	NA	NA	NA
1	1722057	1722557	AT1G05750	+	1644	1	1706885	1707385	AT1G05750	+	1448	Yes	Yes	15172	10	0.123111	572.195	-16.0351	0.030398	3	0.10885	194.148	-2.52285	1601	1298	-4.43926	378.048	6	0.681936	9.04e-05	0.795441	0.00994381
1	18513950	18514450	AT1G49990	+	111	1	18503361	18503861	AT1G49990	+	1157	NA	Yes	10589	6	0.070444	600	-7.52339	1	2	0.070444	200	-1.33091	88	1069	-2.98422	400	2	2.70964	3.27e-12	2.62727	1.02e-136
2	13787479	13787979	AT2G32470	+	118	2	13783937	13784437	AT2G32470	+	929	NA	Yes	3542	15	0.070444	1500	-29.6482	0	6	0.070444	600	-7.53633	98	804	-5.95414	900	10	NA	NA	NA	NA
2	12621058	12621558	AT2G29440	+	1679	2	12615013	12615513	AT2G29440	+	237	Yes	NA	6045	18	0.070444	1800	-37.9336	0	6	0.070444	600	-7.47619	1421	218	-8.92615	1200	-14	-2.56282	8.68e-26	-0.53304	0.00126089
1	27651145	27651645	AT1G73570	+	1734	1	27650379	27650879	AT1G73570	+	970	Yes	NA	766	23	0.086986	1862.61	-52.8048	0	9	0.070444	900	-13.7305	1543	866	-5.28218	962.609	20	1.46631	4.72e-09	NA	NA
1	1652860	1653360	AT1G05570	+	58	1	1643897	1644397	AT1G05570	+	1274	NA	Yes	8963	6	0.070444	600	-7.61415	1	1	0.070444	100	-0.450962	38	988	-5.78549	500	2	-2.51135	3.67e-35	NA	NA
1	576516	577016	AT1G02670	+	123	1	564351	564851	AT1G02670	+	1264	NA	Yes	12165	6	0.070444	600	-7.51393	1	4	0.070444	400	-3.99015	125	1202	-0.99116	200	2	1.90406	2.25e-08	0.530188	0.00236201
1	10055012	10055512	AT1G28610	+	1711	1	10014032	10014532	AT1G28610	+	1684	Yes	Yes	40980	6	0.149011	283.644	-7.43446	1	1	0.109581	64.2844	-0.458449	1289	1623	-3.96645	219.36	2	4.4693	1.6e-30	-2.88496	0.00138109
1	26725999	26726499	AT1G70890	+	1490	1	26713025	26713525	AT1G70890	+	225	Yes	NA	12974	11	0.070444	1100	-18.6215	0.002689	1	0.070444	100	-0.457019	1272	176	-16.2213	1000	-6	NA	NA	NA	NA
1	18889599	18890099	AT1G50960	+	1010	1	18883500	18884000	AT1G50960	+	67	Yes	NA	6099	15	0.070444	1500	-30.3252	0	5	0.070444	500	-5.71187	1002	64	-7.93952	1000	-10	NA	NA	1.16809	0.000138187
1	9274070	9274570	AT1G26790	+	994	1	9270637	9271137	AT1G26790	+	32	Yes	NA	3433	6	0.070444	600	-7.77799	1	1	0.070444	100	-0.451865	752	43	-5.76405	500	2	NA	NA	NA	NA
2	16633104	16633604	AT2G39850	+	110	2	16618430	16618930	AT2G39850	+	1292	Yes	Yes	14674	7	0.070444	700	-9.53692	1	2	0.070444	200	-1.3309	121	1485	-4.15597	500	2	6.7857	1.42e-36	NA	NA
1	18889586	18890086	AT1G50960	+	1010	1	18886401	18886901	AT1G50960	+	82	Yes	NA	3185	20	0.070444	2000	-45.5856	0	7	0.070444	700	-9.68233	1002	56	-10.4694	1300	-16	NA	NA	NA	NA
1	5888521	5889021	AT1G17220	+	47	1	5879020	5879520	AT1G17220	+	1437	NA	Yes	9501	9	0.070444	900	-14.3505	0.162184	2	0.070444	200	-1.33104	29	1056	-7.43744	700	-4	3.97064	8.46e-180	4.54247	4.68e-145
2	16392442	16392942	AT2G39260	+	303	2	16387100	16387600	AT2G39260	+	794	NA	Yes	5342	13	0.070444	1300	-23.7012	2.1e-05	8	0.070444	800	-11.585	224	610	-2.22585	500	8	NA	NA	NA	NA
1	2627555	2628055	AT1G08320	+	831	1	2618986	2619486	AT1G08320	+	67	Yes	NA	8569	8	0.070444	800	-11.823	1	3	0.070444	300	-2.53714	667	77	-3.48867	500	4	-4.66741	6.36e-52	NA	NA
2	19694421	19694921	AT2G48160	+	126	2	19686102	19686602	AT2G48160	+	606	Yes	Yes	8319	10	0.070444	1000	-16.3078	0.024482	2	0.070444	200	-1.33091	100	579	-8.57198	800	-6	0.411714	0.0142708	-4.944	1.22e-79
1	10672075	10672575	AT1G30290	+	121	1	10655509	10656009	AT1G30290	+	1421	NA	Yes	16566	15	0.070444	1500	-29.627	0	2	0.070444	200	-1.33092	74	1439	-18.3267	1300	-10	NA	NA	-1.7905	1.68e-42
1	247504	248004	AT1G01680	+	1047	1	242949	243449	AT1G01680	+	407	Yes	NA	4555	20	0.070444	2000	-43.7158	0	10	0.070444	1000	-16.0893	986	462	-5.02332	1000	16	NA	NA	-1.28514	0.000109549
1	21641510	21642010	AT1G58330	+	1975	1	21623972	21624472	AT1G58330	+	74	Yes	NA	17538	8	0.070444	800	-11.7899	1	4	0.070444	400	-4.01941	1553	60	-2.26909	400	4	NA	NA	3.2323	1.62e-106
2	6293341	6293841	AT2G14700	+	1178	2	6280447	6280947	AT2G14700	+	60	Yes	NA	12894	6	0.070444	600	-7.60769	1	2	0.070444	200	-1.33095	1037	45	-3.02509	400	2	NA	NA	NA	NA
2	1014937	1015437	AT2G03340	+	97	2	1007493	1007993	AT2G03340	+	923	NA	Yes	7444	7	0.070444	700	-9.55668	1	3	0.070444	300	-2.53371	99	762	-2.51571	400	2	0.726494	2.4e-13	NA	NA
2	15504976	15505476	AT2G36910	+	88	2	15490119	15490619	AT2G36910	+	1328	NA	Yes	14857	9	0.070444	900	-14.0334	0.212549	3	0.070444	300	-2.53694	78	1055	-4.57866	600	4	NA	NA	1.82667	5.28e-11
1	24050442	24050942	AT1G64740	+	99	1	24044511	24045011	AT1G64740	+	980	NA	Yes	5931	9	0.070444	900	-13.9947	0.218481	2	0.070444	200	-1.33091	82	723	-7.01571	700	-4	1.05015	0.000137205	5.06858	7.68e-66
1	10394879	10395379	AT1G29720	+	48	1	10381527	10382027	AT1G29720	+	1406	NA	Yes	13352	6	0.070444	600	-7.65499	1	1	0.070444	100	-0.452448	47	1345	-5.75034	500	2	7.86812	8.13e-20	0.701512	1.42e-05
1	10194412	10194912	AT1G29170	+	1562	1	10179511	10180011	AT1G29170	+	83	Yes	NA	14901	7	0.070444	700	-9.58513	1	6	0.070444	600	-7.5423	1333	93	-0.58036	100	2	NA	NA	NA	NA
2	11570911	11571411	AT2G27090	+	1069	2	11545533	11546033	AT2G27090	+	494	Yes	Yes	25378	6	0.070444	600	-7.44931	1	5	0.070444	500	-5.62478	905	437	-0.578896	100	2	NA	NA	1.20123	9.22e-26
1	28348427	28348927	AT1G75510	+	173	1	28336040	28336540	AT1G75510	+	1043	NA	Yes	12387	8	0.070444	800	-11.6141	1	5	0.070444	500	-5.65657	138	855	-1.44784	300	4	-0.272323	0.0347174	3.40687	1.17e-58
1	24860487	24860987	AT1G66650	+	327	1	24856489	24856989	AT1G66650	+	157	Yes	NA	3998	11	0.070444	1100	-18.713	0.00249	4	0.070444	400	-3.98474	330	157	-4.91939	700	6	NA	NA	NA	NA
2	16892107	16892607	AT2G40450	+	1992	2	16873394	16873894	AT2G40450	+	92	Yes	NA	18713	7	0.070444	700	-9.56582	1	0	0	0	0	0	0	0	700	2	NA	NA	0.344823	0.000492338
1	20698425	20698925	AT1G55430	+	767	1	20677536	20678036	AT1G55430	+	1335	NA	Yes	20889	6	0.070444	600	-7.44182	1	2	0.070444	200	-1.33089	753	1273	-2.9486	400	2	-5.05875	1.87e-35	-2.66179	1.03e-14
1	524007	524507	AT1G02520	+	1552	1	518104	518604	AT1G02520	+	1264	Yes	Yes	5903	26	0.101453	1805.3	-62.4635	0	8	0.090638	621.757	-11.5062	1442	1200	-11.4744	1183.54	-24	-4.92664	2.58e-65	-0.901316	0.00223149
1	6495989	6496489	AT1G18835	+	1297	1	6488488	6488988	AT1G18835	+	81	Yes	NA	7501	10	0.070444	1000	-16.4816	0.021388	9	0.070444	900	-14.1446	1252	67	-0.590689	100	6	NA	NA	NA	NA
2	14557883	14558383	AT2G34555	+	1186	2	14548087	14548587	AT2G34555	+	120	Yes	NA	9796	14	0.070444	1400	-26.8058	1e-06	6	0.070444	600	-7.55334	1011	85	-5.02766	800	10	NA	NA	-0.326459	0.000531673
1	3902610	3903110	AT1G11600	+	1722	1	3880046	3880546	AT1G11600	+	1425	Yes	Yes	22564	7	0.126904	388.566	-9.40456	1	3	0.106946	197.604	-2.52291	1686	1211	-1.68995	190.961	2	3.72042	2.28e-55	-0.916785	0.00735336
2	8698068	8698568	AT2G20150	+	1811	2	8688586	8689086	AT2G20150	+	63	Yes	NA	9482	10	0.070444	1000	-16.6254	0.018892	2	0.070444	200	-1.33097	1667	40	-8.9512	800	-6	NA	NA	NA	NA
1	3824048	3824548	AT1G11362	+	170	1	3822076	3822576	AT1G11362	+	1663	Yes	Yes	1972	32	0.070444	3200	-85.4638	0	15	0.070444	1500	-29.515	140	1326	-9.57951	1700	-32	NA	NA	NA	NA
2	19220464	19220964	AT2G46770	+	133	2	19214542	19215042	AT2G46770	+	1394	NA	Yes	5922	11	0.070444	1100	-18.7684	0.00238	4	0.070444	400	-4.00321	84	1593	-5.01952	700	6	NA	NA	-1.73175	1.06e-08
1	3233931	3234431	AT1G09935	+	118	1	3232550	3233050	AT1G09935	+	1668	NA	Yes	1381	29	0.070444	2900	-75.7457	0	17	0.070444	1700	-35.6682	105	1252	-5.44456	1200	28	NA	NA	-2.87445	2.55e-07
2	19414977	19415477	AT2G47275	+	110	2	19406493	19406993	AT2G47275	+	1540	NA	Yes	8484	10	0.070444	1000	-16.3527	0.023661	7	0.070444	700	-9.5533	99	1061	-1.32433	300	6	NA	NA	-1.18377	0.000115645
2	17075534	17076034	AT2G40925	+	68	2	17070985	17071485	AT2G40925	+	1371	NA	Yes	4549	10	0.070444	1000	-16.5773	0.019713	6	0.070444	600	-7.57058	75	1356	-1.93796	400	6	NA	NA	NA	NA
2	15107153	15107653	AT2G35960	+	860	2	15104577	15105077	AT2G35960	+	136	Yes	NA	2576	14	0.070444	1400	-26.7222	1e-06	9	0.070444	900	-13.9219	821	130	-2.15121	500	10	3.20695	2.91e-40	2.27826	2.68e-05
1	16871529	16872029	AT1G44575	+	379	1	16851056	16851556	AT1G44575	+	579	Yes	Yes	20473	6	0.070444	600	-7.45572	1	0	0.070444	0	1.00225	223	498	1.00225	600	2	7.31204	5.73e-226	5.73394	0
2	17824370	17824870	AT2G42835	+	52	2	17820887	17821387	AT2G42835	+	833	NA	Yes	3483	6	0.070444	600	-7.63667	1	3	0.070444	300	-2.54059	63	722	-1.71172	300	2	NA	NA	NA	NA
2	617514	618014	AT2G02350	+	866	2	616452	616952	AT2G02350	+	293	NA	Yes	1062	35	0.070444	3500	-95.1089	0	18	0.070444	1800	-37.7782	770	319	-8.0417	1700	-36	-1.22694	3.36e-07	NA	NA
1	23845401	23845901	AT1G64255	+	910	1	23834952	23835452	AT1G64255	+	215	Yes	Yes	10449	7	0.070444	700	-9.46608	1	2	0.070444	200	-1.3309	882	172	-4.13924	500	2	NA	NA	NA	NA
1	26407194	26407694	AT1G70110	+	1234	1	26401522	26402022	AT1G70110	+	184	Yes	NA	5672	8	0.070444	800	-11.6064	1	6	0.070444	600	-7.47927	967	205	-0.932203	200	4	NA	NA	2.36941	8.04e-31
1	10901012	10901512	AT1G30730	+	94	1	10895516	10896016	AT1G30730	+	985	NA	Yes	5496	14	0.070444	1400	-27.0061	1e-06	6	0.070444	600	-7.57058	75	948	-5.07205	800	10	-1.99791	0.0020156	NA	NA
1	23844568	23845068	AT1G64255	+	1814	1	23836047	23836547	AT1G64255	+	773	Yes	Yes	8521	17	0.072518	1651.38	-34.6052	0	9	0.070444	900	-13.733	1440	803	-3.84514	751.379	12	NA	NA	NA	NA
1	4132943	4133443	AT1G12190	+	1660	1	4117502	4118002	AT1G12190	+	156	Yes	NA	15441	8	0.070444	800	-11.6281	1	1	0.070444	100	-0.456245	1736	120	-9.52471	700	-4	NA	NA	NA	NA
2	443915	444415	AT2G01950	+	1206	2	432948	433448	AT2G01950	+	456	Yes	Yes	10967	9	0.070444	900	-13.7603	0.258356	3	0.070444	300	-2.52448	1040	458	-4.45484	600	4	-2.05454	2.64e-10	2.52499	5.52e-33
2	8247978	8248478	AT2G19030	+	61	2	8241412	8241912	AT2G19030	+	1163	Yes	Yes	6566	6	0.070444	600	-7.60462	1	3	0.070444	300	-2.53282	107	1246	-1.702	300	2	NA	NA	NA	NA
1	4268485	4268985	AT1G12520	+	207	1	4260500	4261000	AT1G12520	+	1119	NA	Yes	7985	17	0.070444	1700	-35.0479	0	10	0.070444	1000	-16.2714	143	966	-3.15626	700	12	-0.418162	0.00849585	NA	NA
2	17515976	17516476	AT2G41960	+	99	2	17512011	17512511	AT2G41960	+	399	NA	Yes	3965	6	0.070444	600	-7.53521	1	4	0.070444	400	-4.01059	71	525	-0.991261	200	2	NA	NA	NA	NA
1	10599480	10599980	AT1G30140	+	117	1	10596395	10596895	AT1G30140	+	737	NA	Yes	3085	12	0.070444	1200	-21.4003	0.000196	7	0.070444	700	-9.56977	90	583	-2.40931	500	8	NA	NA	NA	NA
1	6521306	6521806	AT1G18880	+	420	1	6516587	6517087	AT1G18880	+	71	Yes	NA	4719	7	0.070444	700	-9.61882	1	1	0.070444	100	-0.453961	508	62	-7.60166	600	-2	-3.55056	4.76e-37	NA	NA
1	6521190	6521690	AT1G18880	+	581	1	6519399	6519899	AT1G18880	+	31	Yes	NA	1791	7	0.070444	700	-9.93891	1	4	0.070444	400	-4.06117	546	35	-1.58522	300	2	-3.55056	4.76e-37	NA	NA
1	19307470	19307970	AT1G51950	+	117	1	19295497	19295997	AT1G51950	+	904	NA	Yes	11973	11	0.070444	1100	-18.8184	0.002287	4	0.070444	400	-4.00576	79	665	-5.03368	700	6	1.58384	4.1e-11	2.27293	4.16e-55
2	13910356	13910856	AT2G32795	+	1626	2	13887970	13888470	AT2G32795	+	156	Yes	Yes	22386	7	0.070444	700	-9.49393	1	1	0.070444	100	-0.456961	1406	170	-7.48991	600	-2	2.7413	5.12e-18	-3.00634	7.36e-05
2	12620984	12621484	AT2G29440	+	1679	2	12616518	12617018	AT2G29440	+	175	Yes	NA	4466	17	0.070444	1700	-35.1617	0	8	0.070444	800	-11.6594	1421	128	-5.06024	900	12	-2.56282	8.68e-26	NA	NA
1	11183925	11184425	AT1G31280	+	35	1	11166559	11167059	AT1G31280	+	1205	NA	Yes	17366	7	0.070444	700	-9.87097	1	4	0.070444	400	-4.04044	44	1016	-1.57444	300	2	NA	NA	NA	NA
1	1702404	1702904	AT1G05675	+	134	1	1690800	1691300	AT1G05675	+	1161	NA	Yes	11604	7	0.070444	700	-9.51073	1	2	0.070444	200	-1.33091	92	976	-4.17404	500	2	6.95174	2.34e-62	-5.49726	1.01e-09
1	7899954	7900454	AT1G22380	+	1297	1	7897459	7897959	AT1G22380	+	245	Yes	NA	2495	29	0.070444	2900	-73.836	0	13	0.070444	1300	-23.8103	1225	205	-9.08344	1600	-28	NA	NA	-1.00454	1.51e-05
3	1440852	1441352	AT3G05150	+	710	3	1430399	1430899	AT3G05150	+	66	Yes	NA	10453	7	0.070444	700	-9.63664	1	2	0.070444	200	-1.33093	642	54	-4.22887	500	2	-2.37512	1.29e-07	NA	NA
2	18314454	18314954	AT2G44340	+	92	2	18307489	18307989	AT2G44340	+	1839	NA	Yes	6965	11	0.070444	1100	-18.933	0.002083	6	0.070444	600	-7.5423	93	1345	-2.56339	500	6	-5.36549	2.37e-12	-1.67675	9.05e-09
2	16398046	16398546	AT2G39260	+	71	2	16390480	16390980	AT2G39260	+	292	NA	Yes	7566	7	0.070444	700	-9.61882	1	2	0.070444	200	-1.33092	66	256	-4.2044	500	2	NA	NA	7.50945	2.11e-82
2	7415493	7415993	AT2G17050	+	1007	2	7407543	7408043	AT2G17050	+	73	Yes	NA	7950	10	0.070444	1000	-16.5363	0.020427	7	0.070444	700	-9.61882	1048	71	-1.33238	300	6	-3.20113	7.7e-19	3.69859	5.27e-28
2	18873031	18873531	AT2G45850	+	1472	2	18864486	18864986	AT2G45850	+	69	Yes	NA	8545	9	0.070444	900	-14.1309	0.19731	2	0.070444	200	-1.33098	1333	38	-7.27346	700	-4	4.57788	4.19e-232	NA	NA
2	7415479	7415979	AT2G17050	+	1007	2	7408965	7409465	AT2G17050	+	73	Yes	NA	6514	14	0.070444	1400	-27.2805	1e-06	10	0.070444	1000	-16.4181	1048	93	-1.62284	400	10	-3.20113	7.7e-19	NA	NA
2	13796679	13797179	AT2G32500	+	1179	2	13787993	13788493	AT2G32500	+	83	Yes	NA	8686	6	0.070444	600	-7.55645	1	4	0.070444	400	-4.00804	942	75	-0.991246	200	2	3.60481	1.4e-51	NA	NA
1	26152043	26152543	AT1G69550	+	343	1	26147478	26147978	AT1G69550	+	1693	Yes	Yes	4565	29	0.070444	2900	-73.3607	0	11	0.070444	1100	-18.5515	339	1278	-11.7187	1800	-28	2.52133	7.8e-30	NA	NA
2	1080610	1081110	AT2G03560	+	1128	2	1059525	1060025	AT2G03560	+	87	Yes	NA	21085	7	0.070444	700	-9.57604	1	1	0.070444	100	-0.454561	1196	71	-7.57889	600	-2	NA	NA	-1.19396	8.52e-09
1	24202993	24203493	AT1G65140	+	146	1	24195479	24195979	AT1G65140	+	682	NA	Yes	7514	10	0.070444	1000	-16.2659	0.025271	3	0.070444	300	-2.53048	136	643	-5.69364	700	6	NA	NA	-1.17329	0.00141585
2	15515408	15515908	AT2G36950	+	1058	2	15510988	15511488	AT2G36950	+	88	Yes	NA	4420	7	0.070444	700	-9.5739	1	6	0.070444	600	-7.56141	741	80	-0.57873	100	2	NA	NA	NA	NA
1	29517121	29517621	AT1G78450	+	226	1	29512851	29513351	AT1G78450	+	724	NA	Yes	4270	6	0.070444	600	-7.47448	1	4	0.070444	400	-3.97945	210	639	-0.99113	200	2	1.74589	2.78e-06	NA	NA
2	9810472	9810972	AT2G23050	+	79	2	9805929	9806429	AT2G23050	+	1100	NA	Yes	4543	9	0.070444	900	-14.0735	0.206454	2	0.070444	200	-1.33091	76	912	-7.03235	700	-4	-4.50385	3.91e-18	-3.51675	2.02e-20
2	1080520	1081020	AT2G03560	+	1128	2	1064456	1064956	AT2G03560	+	1394	Yes	Yes	16064	18	0.08132	1559.25	-37.4632	0	7	0.091777	537.287	-9.40663	1196	1465	-9.31826	1021.96	-14	NA	NA	-3.1745	1.48e-15
2	6293310	6293810	AT2G14700	+	1178	2	6284883	6285383	AT2G14700	+	52	Yes	NA	8427	10	0.070444	1000	-16.7663	0.016566	4	0.070444	400	-4.02242	1037	57	-4.06159	600	6	NA	NA	NA	NA
1	8874464	8874964	AT1G25310	+	151	1	8860972	8861472	AT1G25310	+	1685	NA	Yes	13492	6	0.070444	600	-7.49779	1	5	0.070444	500	-5.65525	142	1472	-0.575084	100	2	NA	NA	2.08691	2.92e-56
2	1016961	1017461	AT2G03340	+	83	2	1008808	1009308	AT2G03340	+	1470	NA	Yes	8153	8	0.070444	800	-11.7559	1	3	0.070444	300	-2.53734	76	1276	-3.48995	500	4	0.726494	2.4e-13	NA	NA
1	20857999	20858499	AT1G55800	+	350	1	20855064	20855564	AT1G55800	+	883	NA	Yes	2935	31	0.070444	3100	-80.3449	0	18	0.070444	1800	-37.8498	275	765	-5.41087	1300	30	NA	NA	NA	NA
1	10194416	10194916	AT1G29170	+	1562	1	10180505	10181005	AT1G29170	+	175	Yes	NA	13911	17	0.070444	1700	-35.1617	0	5	0.070444	500	-5.66967	1333	108	-10.1532	1200	-12	NA	NA	NA	NA
2	413572	414072	AT2G01905	+	36	2	406499	406999	AT2G01905	+	1083	NA	Yes	7073	8	0.070444	800	-12.1397	1	1	0.070444	100	-0.447788	27	848	-10.0295	700	-4	NA	NA	-3.92635	1.11e-18
1	24859974	24860474	AT1G66650	+	235	1	24858265	24858765	AT1G66650	+	186	Yes	NA	1709	7	0.070444	700	-9.47753	1	3	0.070444	300	-2.52789	239	195	-2.49675	400	2	NA	NA	NA	NA
2	11571474	11571974	AT2G27090	+	597	2	11551983	11552483	AT2G27090	+	516	Yes	Yes	19491	6	0.070444	600	-7.44841	1	1	0.070444	100	-0.458021	445	511	-5.62452	500	2	NA	NA	1.19266	1.32e-07
2	16892080	16892580	AT2G40450	+	1992	2	16877023	16877523	AT2G40450	+	119	Yes	NA	15057	8	0.070444	800	-11.6727	1	0	0	0	0	0	0	0	800	4	NA	NA	NA	NA
1	20698446	20698946	AT1G55430	+	767	1	20682520	20683020	AT1G55430	+	1494	NA	Yes	15926	13	0.070444	1300	-23.5656	2.4e-05	3	0.070444	300	-2.52349	753	1392	-9.5971	1000	-8	-5.05875	1.87e-35	-2.989	1.96e-13
1	24040459	24040959	AT1G64700	+	595	1	24037959	24038459	AT1G64700	+	159	Yes	NA	2500	20	0.070444	2000	-44.4169	0	12	0.070444	1200	-21.2938	502	148	-3.4682	800	16	-0.814391	0.0279958	0.465207	0.0146369
1	29195553	29196053	AT1G77680	+	665	1	29179534	29180034	AT1G77680	+	1428	Yes	Yes	16019	9	0.070444	900	-13.7404	0.262094	3	0.070444	300	-2.52374	647	1122	-4.44778	600	4	-0.480897	0.00504695	NA	NA
2	14557886	14558386	AT2G34555	+	1186	2	14548916	14549416	AT2G34555	+	72	Yes	NA	8970	10	0.070444	1000	-16.544	0.020295	6	0.070444	600	-7.58823	1011	67	-1.94576	400	6	NA	NA	NA	NA
1	6496021	6496521	AT1G18835	+	1297	1	6491895	6492395	AT1G18835	+	58	Yes	NA	4126	18	0.070444	1800	-40.0059	0	8	0.070444	800	-11.9259	1252	52	-6.53199	1000	14	NA	NA	NA	NA
1	7850960	7851460	AT1G22230	+	74	1	7846525	7847025	AT1G22230	+	1871	NA	Yes	4435	15	0.070444	1500	-30.1723	0	5	0.070444	500	-5.77196	41	1565	-8.40585	1000	-10	-2.4081	8.32e-13	-3.55252	1.02e-48
2	7914967	7915467	AT2G18190	+	1302	2	7907981	7908481	AT2G18190	+	138	Yes	NA	6986	15	0.070444	1500	-29.5253	0	6	0.070444	600	-7.51052	1287	128	-5.87015	900	10	NA	NA	NA	NA
1	7912611	7913111	AT1G22410	+	127	1	7899525	7900025	AT1G22410	+	1581	NA	Yes	13086	7	0.070444	700	-9.51732	1	0	0.070444	0	1.00441	114	1699	1.00441	700	2	-0.714755	5.21e-06	2.03553	1.56e-08
2	8696972	8697472	AT2G20150	+	1317	2	8690443	8690943	AT2G20150	+	38	Yes	NA	6529	7	0.070444	700	-9.83019	1	3	0.070444	300	-2.54956	1518	43	-2.5695	400	2	NA	NA	-0.397926	0.00579113
1	3844477	3844977	AT1G11420	+	109	1	3840972	3841472	AT1G11420	+	1890	NA	Yes	3505	39	0.070444	3900	-115.04	0	24	0.070444	2400	-58.2729	109	1525	-6.52452	1500	44	-1.37562	1.11e-11	2.69295	5.91e-51
1	25831504	25832004	AT1G68780	+	304	1	25827555	25828055	AT1G68780	+	1915	Yes	Yes	3949	22	0.070444	2200	-50.1376	0	6	0.070444	600	-7.47828	209	1876	-13.9827	1600	-18	7.49873	9.08e-73	NA	NA
2	9626586	9627086	AT2G22650	+	111	2	9623178	9623678	AT2G22650	+	1356	NA	Yes	3408	37	0.070444	3700	-106.776	0	23	0.070444	2300	-54.986	104	1121	-6.03549	1400	42	1.84941	9.33e-17	NA	NA
2	19415007	19415507	AT2G47275	+	110	2	19411965	19412465	AT2G47275	+	594	NA	Yes	3042	13	0.070444	1300	-24.1103	1.5e-05	6	0.070444	600	-7.53521	99	631	-4.0912	700	8	NA	NA	-2.71905	1.53e-52
1	28778503	28779003	AT1G76690	+	2028	1	28770533	28771033	AT1G76690	+	56	Yes	NA	7970	6	0.070444	600	-7.6211	1	2	0.070444	200	-1.33094	1669	51	-3.01502	400	2	-1.71633	1.16e-07	0.208676	0.0310404
2	13018493	13018993	AT2G30560	+	662	2	13015482	13015982	AT2G30560	+	186	Yes	Yes	3011	16	0.070444	1600	-32.1968	0	3	0.070444	300	-2.52889	464	167	-14.6351	1300	-12	NA	NA	NA	NA
2	9326118	9326618	AT2G21880	+	1785	2	9309527	9310027	AT2G21880	+	122	Yes	NA	16591	7	0.070444	700	-9.52251	1	3	0.070444	300	-2.53506	1681	89	-2.52014	400	2	NA	NA	-4.9492	6.84e-73
1	11643426	11643926	AT1G32270	+	46	1	11630181	11630681	AT1G32270	+	476	NA	Yes	13245	6	0.070444	600	-7.66541	1	1	0.070444	100	-0.449205	31	421	-5.82799	500	2	-5.00767	3.71e-12	NA	NA
1	19369025	19369525	AT1G52080	+	156	1	19330910	19331410	AT1G52080	+	1343	NA	Yes	38115	6	0.070444	600	-7.49553	1	3	0.070444	300	-2.52963	151	1283	-1.69807	300	2	-1.00311	4.85e-17	NA	NA
1	4133069	4133569	AT1G12190	+	1660	1	4120868	4121368	AT1G12190	+	214	Yes	NA	12201	10	0.070444	1000	-16.1831	0.026964	6	0.070444	600	-7.49103	1736	167	-1.90412	400	6	NA	NA	NA	NA
1	12448993	12449493	AT1G34180	+	799	1	12442513	12443013	AT1G34180	+	56	Yes	NA	6480	8	0.070444	800	-11.8927	1	4	0.070444	400	-4.05072	807	39	-2.31052	400	4	-3.15672	1.81e-11	NA	NA
1	8864563	8865063	AT1G25280	+	1346	1	8858476	8858976	AT1G25280	+	102	Yes	NA	6087	14	0.070444	1400	-26.933	1e-06	4	0.070444	400	-3.99934	1408	93	-8.63804	1000	-10	-0.481043	0.000346964	NA	NA
1	18245882	18246382	AT1G49320	+	118	1	18235004	18235504	AT1G49320	+	1211	NA	Yes	10878	7	0.070444	700	-9.52698	1	4	0.070444	400	-4.00804	75	1069	-1.55832	300	2	-1.72135	2.39e-08	-0.519545	0.00560524
2	13910384	13910884	AT2G32795	+	1626	2	13890571	13891071	AT2G32795	+	121	Yes	NA	19813	7	0.070444	700	-9.5236	1	0	0.070444	0	1.00381	1406	132	1.00381	700	2	2.7413	5.12e-18	NA	NA
1	19126064	19126564	AT1G51580	+	1555	1	19118583	19119083	AT1G51580	+	74	Yes	NA	7481	7	0.070444	700	-9.60933	1	3	0.070444	300	-2.54121	1347	61	-2.54075	400	2	1.00216	2.39e-10	0.74433	0.000625893
2	12620029	12620529	AT2G29440	+	1376	2	12618033	12618533	AT2G29440	+	130	Yes	NA	1996	17	0.070444	1700	-35.4214	0	8	0.070444	800	-11.6456	1267	139	-5.03802	900	12	-2.56282	8.68e-26	-0.889982	0.000310643
1	8865521	8866021	AT1G25280	+	200	1	8860633	8861133	AT1G25280	+	1512	Yes	Yes	4888	17	0.070444	1700	-35.0696	0	5	0.070444	500	-5.63917	220	1362	-9.85044	1200	-12	-0.481043	0.000346964	2.08691	2.92e-56
1	3009417	3009917	AT1G09310	+	41	1	3003833	3004333	AT1G09310	+	1289	NA	Yes	5584	9	0.070444	900	-14.4554	0.146626	3	0.070444	300	-2.54713	47	1158	-4.68615	600	4	6.55454	2.77e-45	-0.577907	0.000103518
1	25768554	25769054	AT1G68630	+	80	1	25760622	25761122	AT1G68630	+	565	NA	Yes	7932	6	0.070444	600	-7.56141	1	4	0.070444	400	-4.0037	83	539	-0.991221	200	2	NA	NA	5.5984	9.73e-51
1	10121845	10122345	AT1G29020	+	818	1	10117598	10118098	AT1G29020	+	104	Yes	NA	4247	16	0.070444	1600	-32.6866	0	7	0.070444	700	-9.57604	752	87	-5.55492	900	12	-4.00075	1.31e-40	NA	NA
1	19965035	19965535	AT1G53490	+	66	1	19958587	19959087	AT1G53490	+	1473	NA	Yes	6448	17	0.070444	1700	-36.4682	0	6	0.070444	600	-7.61415	58	1193	-8.54826	1100	-14	NA	NA	-3.08073	3.3e-59
2	11764106	11764606	AT2G27530	+	1387	2	11757067	11757567	AT2G27530	+	61	Yes	NA	7039	7	0.070444	700	-9.65752	1	2	0.070444	200	-1.33099	1246	36	-4.29904	500	2	NA	NA	NA	NA
2	8987982	8988482	AT2G20890	+	1282	2	8979576	8980076	AT2G20890	+	172	Yes	NA	8406	6	0.070444	600	-7.48918	1	2	0.070444	200	-1.3309	1201	182	-2.96315	400	2	3.6414	2.43e-217	1.38721	1.43e-12
2	17295554	17296054	AT2G41475	+	805	2	17293092	17293592	AT2G41475	+	461	Yes	Yes	2462	21	0.070444	2100	-46.7537	0	9	0.070444	900	-13.7617	757	446	-6.98792	1200	-18	-1.12424	0.00127801	NA	NA
2	17590975	17591475	AT2G42210	+	151	2	17587494	17587994	AT2G42210	+	476	NA	Yes	3481	8	0.070444	800	-11.6328	1	2	0.070444	200	-1.3309	107	402	-5.49864	600	4	NA	NA	4.74874	3.4e-40
2	17295954	17296454	AT2G41475	+	937	2	17294441	17294941	AT2G41475	+	1240	Yes	Yes	1513	76	0.070444	7600	-260.255	0	59	0.070444	5900	-187.841	732	1102	-3.89532	1700	102	-1.12424	0.00127801	NA	NA
2	18307905	18308405	AT2G44300	+	1490	2	18297992	18298492	AT2G44300	+	66	Yes	NA	9913	8	0.070444	800	-11.8283	1	3	0.070444	300	-2.53945	1221	67	-3.50338	500	4	-1.67675	9.05e-09	-0.71035	7.7e-10
2	16631407	16631907	AT2G39850	+	687	2	16628029	16628529	AT2G39850	+	146	Yes	NA	3378	17	0.070444	1700	-35.3099	0	9	0.070444	900	-13.9311	593	125	-4.02323	800	12	6.7857	1.42e-36	NA	NA
2	7669125	7669625	AT2G17640	+	960	2	7666534	7667034	AT2G17640	+	185	Yes	NA	2591	36	0.070444	3600	-100.152	0	21	0.070444	2100	-47.5138	735	169	-6.4305	1500	38	NA	NA	-1.26494	1.59e-14
1	23511468	23511968	AT1G63410	+	431	1	23497113	23497613	AT1G63410	+	1449	Yes	Yes	14355	6	0.070444	600	-7.4524	1	1	0.070444	100	-0.458031	452	1191	-5.6243	500	2	-5.8903	4.11e-31	1.12647	2.51e-05
1	25444977	25445477	AT1G67860	+	499	1	25426559	25427059	AT1G67860	+	1550	Yes	Yes	18418	6	0.070444	600	-7.4491	1	3	0.070444	300	-2.52407	546	1144	-1.69134	300	2	8.17116	4.78e-52	-2.88276	8.4e-10
2	13814983	13815483	AT2G32540	+	1087	2	13799012	13799512	AT2G32540	+	151	Yes	NA	15971	7	0.070444	700	-9.49731	1	0	0.070444	0	1.00349	956	144	1.00349	700	2	4.39237	9.4e-44	-2.53209	4.89e-07
1	20280582	20281082	AT1G54330	+	1255	1	20274003	20274503	AT1G54330	+	102	Yes	NA	6579	12	0.070444	1200	-21.4762	0.000184	8	0.070444	800	-11.7526	1276	84	-1.74908	400	8	-1.92039	5.98e-06	1.45846	1.16e-20
2	18077409	18077909	AT2G43570	+	119	2	18067371	18067871	AT2G43570	+	1044	NA	Yes	10038	6	0.070444	600	-7.51686	1	2	0.070444	200	-1.3309	131	885	-2.97075	400	2	-3.20947	9.91e-06	NA	NA
2	18873051	18873551	AT2G45850	+	1472	2	18868056	18868556	AT2G45850	+	139	Yes	NA	4995	26	0.070444	2600	-64.5427	0	9	0.070444	900	-13.9331	1333	124	-12.7831	1700	-24	4.57788	4.19e-232	-2.12778	1e-27
2	12819994	12820494	AT2G30040	+	79	2	12805891	12806391	AT2G30040	+	1356	NA	Yes	14103	6	0.070444	600	-7.56315	1	0	0.070444	0	1.00829	61	1114	1.00829	600	2	1.48474	0.000592949	3.93213	1.87e-162
1	12370403	12370903	AT1G34030	+	596	1	12366983	12367483	AT1G34030	+	58	Yes	NA	3420	9	0.070444	900	-14.2185	0.183177	5	0.070444	500	-5.72695	536	56	-2.0921	400	4	-0.303631	1.54e-05	NA	NA
2	13796939	13797439	AT2G32500	+	1223	2	13789012	13789512	AT2G32500	+	84	Yes	NA	7927	6	0.070444	600	-7.55488	1	1	0.070444	100	-0.454561	951	71	-5.70155	500	2	3.60481	1.4e-51	2.5731	1.29e-79
3	1200007	1200507	AT3G04485	+	93	3	1173475	1173975	AT3G04485	+	1718	NA	Yes	26532	6	0.070444	600	-7.5423	1	4	0.070444	400	-4.01847	61	1496	-0.991316	200	2	1.20932	1.99e-08	-3.16016	3.81e-12
2	1079397	1079897	AT2G03560	+	1228	2	1066936	1067436	AT2G03560	+	94	Yes	NA	12461	6	0.070444	600	-7.54105	1	1	0.070444	100	-0.455603	1051	95	-5.67797	500	2	NA	NA	-0.614156	2.03e-12
1	23264493	23264993	AT1G62830	+	77	1	23256939	23257439	AT1G62830	+	907	NA	Yes	7554	9	0.070444	900	-14.0837	0.20489	7	0.070444	700	-9.59518	79	944	-0.913347	200	4	0.338399	0.00982317	-2.15312	2.61e-102
2	15126974	15127474	AT2G36026	+	327	2	15124578	15125078	AT2G36026	+	1270	Yes	Yes	2396	17	0.070444	1700	-34.8235	0	14	0.070444	1400	-26.3258	391	1139	-1.11228	300	12	2.15954	3.78e-07	NA	NA
2	15515376	15515876	AT2G36950	+	1058	2	15511568	15512068	AT2G36950	+	68	Yes	NA	3808	11	0.070444	1100	-19.1278	0.001755	8	0.070444	800	-11.8927	741	56	-1.29758	300	6	NA	NA	NA	NA
1	8242458	8242958	AT1G23220	+	102	1	8240155	8240655	AT1G23220	+	892	NA	Yes	2303	15	0.070444	1500	-29.7833	0	8	0.070444	800	-11.7002	104	838	-3.55909	700	10	0.700834	0.00030113	-4.2004	4.51e-15
2	19081034	19081534	AT2G46493	+	765	2	19077952	19078452	AT2G46493	+	75	Yes	NA	3082	7	0.070444	700	-9.60634	1	6	0.070444	600	-7.55334	680	85	-0.579418	100	2	NA	NA	NA	NA
1	9828988	9829488	AT1G28135	+	172	1	9825041	9825541	AT1G28135	+	582	Yes	Yes	3947	9	0.070444	900	-13.866	0.238401	3	0.070444	300	-2.53197	116	553	-4.52835	600	4	NA	NA	-2.14911	1.45e-14
2	10041981	10042481	AT2G23600	+	156	2	10035451	10035951	AT2G23600	+	1478	NA	Yes	6530	15	0.070444	1500	-29.4427	0	10	0.070444	1000	-16.2677	145	1278	-2.05842	500	10	1.66039	3.59e-21	NA	NA
1	21122484	21122984	AT1G56420	+	76	1	21106409	21106909	AT1G56420	+	1864	NA	Yes	16075	10	0.070444	1000	-16.5144	0.020815	1	0.070444	100	-0.454618	72	1525	-14.1119	900	-6	NA	NA	NA	NA
2	9811519	9812019	AT2G23050	+	116	2	9808622	9809122	AT2G23050	+	220	NA	Yes	2897	6	0.070444	600	-7.5192	1	5	0.070444	500	-5.66274	122	299	-0.574145	100	2	-4.50385	3.91e-18	NA	NA
1	8874446	8874946	AT1G25310	+	151	1	8864555	8865055	AT1G25310	+	1346	NA	Yes	9891	11	0.070444	1100	-18.7251	0.002465	5	0.070444	500	-5.65525	142	1408	-3.53129	600	6	NA	NA	-0.481043	0.000346964
1	28450542	28451042	AT1G75770	+	90	1	28434989	28435489	AT1G75770	+	1129	NA	Yes	15553	6	0.070444	600	-7.5462	1	5	0.070444	500	-5.70717	67	955	-0.568563	100	2	1.64836	1.15e-10	-1.51368	0.000707355
1	6533600	6534100	AT1G18910	+	42	1	6525080	6525580	AT1G18910	+	1638	NA	Yes	8520	7	0.070444	700	-9.78556	1	2	0.070444	200	-1.33096	41	1335	-4.27286	500	2	-2.61279	3.39e-39	NA	NA
2	13794533	13795033	AT2G32500	+	242	2	13792122	13792622	AT2G32500	+	901	Yes	Yes	2411	21	0.070444	2100	-47.1461	0	9	0.070444	900	-13.8201	235	729	-7.11537	1200	-18	3.60481	1.4e-51	3.50107	6.5e-12
2	13852588	13853088	AT2G32645	+	143	2	13837000	13837500	AT2G32645	+	1547	NA	Yes	15588	7	0.070444	700	-9.50322	1	6	0.070444	600	-7.50122	144	1410	-0.58385	100	2	NA	NA	-5.04225	1.4e-14
2	7311135	7311635	AT2G16870	+	863	2	7296554	7297054	AT2G16870	+	178	Yes	Yes	14581	6	0.070444	600	-7.4871	1	3	0.070444	300	-2.53048	740	136	-1.69911	300	2	-1.49655	2.33e-16	NA	NA
1	19900505	19901005	AT1G53340	+	127	1	19896130	19896630	AT1G53340	+	890	NA	Yes	4375	18	0.070444	1800	-38.4749	0	10	0.070444	1000	-16.4323	90	790	-3.91724	800	14	-2.84944	1.13e-13	NA	NA
2	11570996	11571496	AT2G27090	+	1069	2	11559063	11559563	AT2G27090	+	100	Yes	Yes	11933	7	0.070444	700	-9.55165	1	6	0.070444	600	-7.52703	905	107	-0.581659	100	2	NA	NA	NA	NA
1	3903427	3903927	AT1G11600	+	172	1	3882381	3882881	AT1G11600	+	939	Yes	Yes	21046	8	0.070444	800	-11.6148	1	3	0.070444	300	-2.52885	168	986	-3.43723	500	4	3.72042	2.28e-55	NA	NA
1	26737034	26737534	AT1G70920	+	109	1	26718952	26719452	AT1G70920	+	944	NA	Yes	18082	7	0.070444	700	-9.53827	1	0	0.070444	0	1.00498	101	784	1.00498	700	2	-2.27898	9.04e-10	-5.00535	2.64e-25
2	16892087	16892587	AT2G40450	+	1992	2	16879416	16879916	AT2G40450	+	207	Yes	Yes	12671	10	0.070444	1000	-16.189	0.026832	0	0	0	0	0	0	0	1000	6	NA	NA	NA	NA
1	2343509	2344009	AT1G07615	+	814	1	2336062	2336562	AT1G07615	+	88	Yes	NA	7447	6	0.070444	600	-7.54896	1	4	0.070444	400	-4.01847	620	61	-0.991316	200	2	NA	NA	-2.80206	2.39e-30
1	7912020	7912520	AT1G22410	+	152	1	7901921	7902421	AT1G22410	+	1977	NA	Yes	10099	12	0.070444	1200	-21.2834	0.000217	5	0.070444	500	-5.6559	140	1742	-4.41472	700	8	-0.714755	5.21e-06	NA	NA
2	8697343	8697843	AT2G20150	+	954	2	8693037	8693537	AT2G20150	+	161	Yes	NA	4306	22	0.070444	2200	-50.8021	0	10	0.070444	1000	-16.3007	1037	129	-6.95206	1200	-18	NA	NA	NA	NA
2	13434454	13434954	AT2G31550	+	1215	2	13430983	13431483	AT2G31550	+	609	Yes	NA	3471	17	0.070444	1700	-34.6479	0	6	0.070444	600	-7.44683	1203	560	-7.66864	1100	-12	NA	NA	-4.97912	3.94e-14
2	16892357	16892857	AT2G40450	+	635	2	16888524	16889024	AT2G40450	+	301	Yes	Yes	3833	15	0.070444	1500	-29.1444	0	7	0.070444	700	-9.45077	698	272	-4.44577	800	10	NA	NA	6.7282	4.51e-20
1	25833003	25833503	AT1G68780	+	1478	1	25828555	25829055	AT1G68780	+	169	Yes	Yes	4448	9	0.070444	900	-13.869	0.237902	1	0.070444	100	-0.457173	1240	194	-11.6003	800	-4	7.49873	9.08e-73	-0.912507	0.000203431
2	8698027	8698527	AT2G20150	+	1811	2	8695970	8696470	AT2G20150	+	290	Yes	NA	2057	76	0.070444	7600	-267.763	0	47	0.070444	4700	-141.64	1667	285	-10.9263	2900	-104	NA	NA	NA	NA
1	5378955	5379455	AT1G15640	+	1060	1	5367099	5367599	AT1G15640	+	157	Yes	NA	11856	6	0.070444	600	-7.49509	1	3	0.070444	300	-2.52933	1019	157	-1.69771	300	2	-5.39105	1.64e-24	NA	NA
3	673379	673879	AT3G02990	+	231	3	666469	666969	AT3G02990	+	1703	NA	Yes	6910	10	0.070444	1000	-16.1701	0.027248	6	0.070444	600	-7.46384	293	1276	-1.89302	400	6	-1.50317	4.11e-15	NA	NA
1	26655090	26655590	AT1G70700	+	553	1	26653385	26653885	AT1G70700	+	263	Yes	NA	1705	7	0.070444	700	-9.45274	1	3	0.070444	300	-2.52628	636	267	-2.4916	400	2	4.15477	2.22e-89	-3.41797	1.6e-11
1	25833476	25833976	AT1G68780	+	1708	1	25829928	25830428	AT1G68780	+	172	Yes	NA	3548	19	0.070444	1900	-41.2182	0	5	0.070444	500	-5.64055	1305	210	-12.5245	1400	-16	7.49873	9.08e-73	NA	NA
1	6180936	6181436	AT1G17960	+	68	1	6177391	6177891	AT1G17960	+	645	NA	Yes	3545	11	0.070444	1100	-19.1278	0.001755	2	0.070444	200	-1.33095	45	504	-10.6859	900	-6	-2.50029	9.01e-16	-3.96404	8.35e-19
1	24509509	24510009	AT1G65880	+	1055	1	24495492	24495992	AT1G65880	+	909	NA	Yes	14017	6	0.070444	600	-7.4397	1	3	0.070444	300	-2.52328	1112	872	-1.69039	300	2	NA	NA	-3.47514	2.96e-08
1	26418402	26418902	AT1G70150	+	208	1	26414603	26415103	AT1G70150	+	1823	NA	Yes	3799	12	0.070444	1200	-21.18	0.000237	8	0.070444	800	-11.6141	173	1513	-1.71836	400	8	NA	NA	-1.75385	9.79e-08
1	22678385	22678885	AT1G61470	+	1236	1	22668600	22669100	AT1G61470	+	69	Yes	NA	9785	6	0.070444	600	-7.58342	1	3	0.070444	300	-2.54	1062	65	-1.71098	300	2	2.55431	1.17e-09	0.528589	0.00571754
2	7733981	7734481	AT2G17790	+	61	2	7727387	7727887	AT2G17790	+	1495	NA	Yes	6594	9	0.070444	900	-14.1913	0.187613	7	0.070444	700	-9.70582	52	1473	-0.913728	200	4	-0.81258	4.54e-15	5.62493	2.79e-86
1	10680651	10681151	AT1G30320	+	758	1	10670512	10671012	AT1G30320	+	81	Yes	NA	10139	6	0.070444	600	-7.55971	1	3	0.070444	300	-2.53798	548	73	-1.70843	300	2	0.748866	1.52e-07	NA	NA
1	3523905	3524405	AT1G10650	+	68	1	3511460	3511960	AT1G10650	+	1045	NA	Yes	12445	6	0.070444	600	-7.58578	1	4	0.070444	400	-4.02825	52	910	-0.991395	200	2	NA	NA	NA	NA
2	7733593	7734093	AT2G17790	+	84	2	7728079	7728579	AT2G17790	+	1055	NA	Yes	5514	15	0.070444	1500	-30.0013	0	4	0.070444	400	-4.0037	83	992	-10.0937	1100	-10	-0.81258	4.54e-15	NA	NA
1	4276514	4277014	AT1G12560	+	134	1	4273580	4274080	AT1G12560	+	991	NA	Yes	2934	16	0.070444	1600	-32.4345	0	7	0.070444	700	-9.50644	139	1047	-5.3984	900	12	-5.96845	4.51e-42	NA	NA
1	4133438	4133938	AT1G12190	+	1554	1	4121974	4122474	AT1G12190	+	187	Yes	NA	11464	7	0.070444	700	-9.47708	1	1	0.070444	100	-0.456705	1341	148	-7.49922	600	-2	NA	NA	-0.96349	1.17e-08
1	1737380	1737880	AT1G05790	+	102	1	1722071	1722571	AT1G05790	+	1644	NA	Yes	15309	7	0.070444	700	-9.54847	1	4	0.070444	400	-4.00183	87	1601	-1.55533	300	2	0.707361	8.75e-10	0.681936	9.04e-05
2	14394948	14395448	AT2G34110	+	1015	2	14381571	14382071	AT2G34110	+	113	Yes	NA	13377	11	0.070444	1100	-18.8332	0.00226	4	0.070444	400	-3.99648	783	101	-4.98251	700	6	NA	NA	NA	NA
1	12449918	12450418	AT1G34180	+	463	1	12445989	12446489	AT1G34180	+	45	Yes	NA	3929	7	0.070444	700	-9.75766	1	1	0.070444	100	-0.452312	477	46	-7.66541	600	-2	-3.15672	1.81e-11	NA	NA
1	3284475	3284975	AT1G10060	+	1018	1	3276960	3277460	AT1G10060	+	86	Yes	NA	7515	9	0.070444	900	-14.0416	0.211312	2	0.070444	200	-1.33092	907	71	-7.04848	700	-4	4.84125	2.03e-91	-2.34162	1.23e-43
1	10208994	10209494	AT1G29200	+	118	1	10183652	10184152	AT1G29200	+	1843	NA	Yes	25342	6	0.070444	600	-7.51763	1	3	0.070444	300	-2.53435	94	1602	-1.70389	300	2	-1.57029	1.19e-05	-2.26083	1.05e-20
1	6268579	6269079	AT1G18210	+	961	1	6265133	6265633	AT1G18210	+	45	Yes	NA	3446	9	0.070444	900	-14.3821	0.157388	3	0.070444	300	-2.54337	753	55	-4.6458	600	4	NA	NA	-1.96346	6.25e-15
1	16892172	16892672	AT1G44750	+	1265	1	16851999	16852499	AT1G44750	+	568	Yes	Yes	40173	6	0.070444	600	-7.44657	1	1	0.070444	100	-0.457925	981	388	-5.62661	500	2	-0.456218	0.00947659	NA	NA
1	18247028	18247528	AT1G49320	+	91	1	18237915	18238415	AT1G49320	+	851	NA	Yes	9113	9	0.070444	900	-14.0219	0.214325	6	0.070444	600	-7.52167	113	872	-1.37762	300	4	-1.72135	2.39e-08	-4.80523	3.56e-34
2	12732061	12732561	AT2G29840	+	78	2	12713480	12713980	AT2G29840	+	1604	NA	Yes	18581	6	0.070444	600	-7.56493	1	3	0.070444	300	-2.5409	62	1434	-1.71212	300	2	NA	NA	0.611069	0.000781117
2	11764064	11764564	AT2G27530	+	1387	2	11758943	11759443	AT2G27530	+	152	Yes	NA	5121	17	0.070444	1700	-35.2744	0	11	0.070444	1100	-18.9105	1246	96	-2.52961	600	12	NA	NA	-2.48274	4.09e-40
2	13910367	13910867	AT2G32795	+	1626	2	13893039	13893539	AT2G32795	+	58	Yes	NA	17328	6	0.070444	600	-7.61415	1	2	0.070444	200	-1.33094	1406	50	-3.01652	400	2	2.7413	5.12e-18	NA	NA
1	11439508	11440008	AT1G31870	+	80	1	11430470	11430970	AT1G31870	+	1628	NA	Yes	9038	9	0.070444	900	-14.0686	0.207248	4	0.070444	400	-4.01669	63	1560	-3.09356	500	4	NA	NA	-1.00108	2.29e-15
1	21190015	21190515	AT1G56553	+	171	1	21178460	21178960	AT1G56553	+	1011	NA	Yes	11555	7	0.070444	700	-9.485	1	0	0.070444	0	1.00409	123	863	1.00409	700	2	NA	NA	6.81212	1.85e-72
1	19126123	19126623	AT1G51580	+	1555	1	19120107	19120607	AT1G51580	+	64	Yes	NA	6016	10	0.070444	1000	-16.6151	0.019066	3	0.070444	300	-2.5525	1347	39	-6.03818	700	6	1.00216	2.39e-10	1.27672	1.18e-19
1	26872466	26872966	AT1G71290	+	1351	1	26863927	26864427	AT1G71290	+	116	Yes	NA	8539	13	0.070444	1300	-24.0761	1.5e-05	6	0.070444	600	-7.53864	1334	96	-4.09743	700	8	NA	NA	NA	NA
2	13909525	13910025	AT2G32795	+	1421	2	13894994	13895494	AT2G32795	+	96	Yes	NA	14531	6	0.070444	600	-7.53864	1	4	0.070444	400	-4.00228	1007	86	-0.991213	200	2	2.7413	5.12e-18	3.05608	2.12e-31
2	8988007	8988507	AT2G20890	+	1282	2	8982445	8982945	AT2G20890	+	1209	Yes	Yes	5562	13	0.080157	1142.47	-23.5336	2.5e-05	7	0.070444	700	-9.40903	1201	1008	-2.32505	442.467	8	3.6414	2.43e-217	NA	NA
1	21417419	21417919	AT1G57820	+	1265	1	21411023	21411523	AT1G57820	+	44	Yes	NA	6396	12	0.070444	1200	-22.3153	8.3e-05	5	0.070444	500	-5.74437	1312	49	-4.68088	700	8	0.506588	0.0112752	NA	NA
1	24724127	24724627	AT1G66310	+	1659	1	24698566	24699066	AT1G66310	+	633	Yes	Yes	25561	7	0.070444	700	-9.41812	1	2	0.070444	200	-1.33089	1841	530	-4.11295	500	2	NA	NA	NA	NA
1	20633500	20634000	AT1G55320	+	1304	1	20629001	20629501	AT1G55320	+	134	Yes	NA	4499	15	0.070444	1500	-29.5468	0	4	0.070444	400	-3.98818	1142	135	-9.84429	1100	-10	-1.72746	1.22e-07	0.822932	5.09e-08
2	14199937	14200437	AT2G33530	+	1803	2	14188092	14188592	AT2G33530	+	67	Yes	NA	11845	8	0.070444	800	-11.823	1	1	0.070444	100	-0.452578	1549	48	-9.73347	700	-4	1.23058	1.75e-08	1.06841	2.52e-07
1	21953344	21953844	AT1G59730	+	561	1	21945020	21945520	AT1G59730	+	575	Yes	Yes	8324	6	0.070444	600	-7.44679	1	4	0.070444	400	-3.97088	467	486	-0.991117	200	2	-4.70146	2.14e-27	NA	NA
2	8988455	8988955	AT2G20890	+	880	2	8983467	8983967	AT2G20890	+	1237	Yes	Yes	4988	13	0.070444	1300	-23.5543	2.4e-05	8	0.070444	800	-11.5152	798	1129	-2.19974	500	8	3.6414	2.43e-217	6.7513	4.54e-15
2	18307479	18307979	AT2G44300	+	1839	2	18301602	18302102	AT2G44300	+	66	Yes	NA	5877	14	0.070444	1400	-27.4143	1e-06	4	0.070444	400	-4.00096	1345	89	-8.65918	1000	-10	-1.67675	9.05e-09	NA	NA
1	17950547	17951047	AT1G48550	+	60	1	17934940	17935440	AT1G48550	+	1769	NA	Yes	15607	6	0.070444	600	-7.60769	1	0	0	0	0	0	0	0	600	2	NA	NA	-5.76486	9.75e-30
3	1440876	1441376	AT3G05150	+	710	3	1437068	1437568	AT3G05150	+	198	Yes	Yes	3808	7	0.070444	700	-9.47238	1	1	0.070444	100	-0.456919	642	166	-7.49142	600	-2	-2.37512	1.29e-07	2.04228	3.39e-26
2	19072444	19072944	AT2G46470	+	131	2	19054931	19055431	AT2G46470	+	1065	NA	Yes	17513	7	0.070444	700	-9.51347	1	2	0.070444	200	-1.33091	99	1108	-4.16867	500	2	-0.221745	0.031483	2.03138	1.35e-07
1	26726033	26726533	AT1G70890	+	1490	1	26720996	26721496	AT1G70890	+	196	Yes	NA	5037	16	0.070444	1600	-32.166	0	8	0.070444	800	-11.5892	1272	215	-4.17417	800	12	NA	NA	NA	NA
2	8122444	8122944	AT2G18735	+	46	2	8116351	8116851	AT2G18735	+	1118	NA	Yes	6093	10	0.070444	1000	-16.8743	0.014927	5	0.070444	500	-5.72915	55	1031	-2.83305	500	6	NA	NA	NA	NA
1	27137872	27138372	AT1G72130	+	820	1	27127439	27127939	AT1G72130	+	332	Yes	NA	10433	8	0.070444	800	-11.5533	1	3	0.070444	300	-2.52677	663	240	-3.42464	500	4	NA	NA	NA	NA
1	24442653	24443153	AT1G65730	+	379	1	24437389	24437889	AT1G65730	+	178	Yes	NA	5264	6	0.070444	600	-7.4871	1	1	0.070444	100	-0.456692	415	147	-5.6537	500	2	-2.97413	9.29e-27	0.699034	0.000939564
3	607471	607971	AT3G02800	+	774	3	603093	603593	AT3G02800	+	116	Yes	Yes	4378	6	0.070444	600	-7.5192	1	1	0.070444	100	-0.455843	630	103	-5.67261	500	2	-2.17614	3.02e-07	-1.42173	3.09e-61
3	425453	425953	AT3G02250	+	92	3	416323	416823	AT3G02250	+	1673	NA	Yes	9130	13	0.070444	1300	-24.2409	1.3e-05	5	0.070444	500	-5.68801	83	1294	-5.50963	800	8	1.49061	1.1e-65	-2.05964	9.48e-66
1	1828991	1829491	AT1G06040	+	1902	1	1822569	1823069	AT1G06040	+	102	Yes	NA	6422	13	0.070444	1300	-24.1624	1.4e-05	5	0.070444	500	-5.68801	1662	83	-5.50963	800	8	2.1941	1.29e-28	NA	NA
1	21742642	21743142	AT1G58590	+	852	1	21733039	21733539	AT1G58590	+	108	Yes	NA	9603	8	0.070444	800	-11.6921	1	1	0.070444	100	-0.454979	728	79	-9.59518	700	-4	1.63245	0.000865226	0.9433	0.00984721
2	13814982	13815482	AT2G32540	+	1087	2	13806977	13807477	AT2G32540	+	126	Yes	NA	8005	6	0.070444	600	-7.51185	1	3	0.070444	300	-2.53282	956	107	-1.702	300	2	4.39237	9.4e-44	-0.666596	2.19e-06
1	20280506	20281006	AT1G54330	+	1255	1	20275996	20276496	AT1G54330	+	94	Yes	NA	4510	13	0.070444	1300	-24.2238	1.3e-05	6	0.070444	600	-7.55039	1276	87	-4.11894	700	8	-1.92039	5.98e-06	-1.01693	1.43e-06
2	17260014	17260514	AT2G41400	+	127	2	17252108	17252608	AT2G41400	+	1137	NA	Yes	7906	16	0.070444	1600	-32.4822	0	6	0.070444	600	-7.52252	112	980	-6.94035	1000	-12	NA	NA	-2.69218	7.82e-33
1	8417486	8417986	AT1G23810	+	69	1	8414044	8414544	AT1G23810	+	1182	NA	Yes	3442	14	0.070444	1400	-27.3534	1e-06	3	0.070444	300	-2.54121	61	1098	-11.8757	1100	-10	NA	NA	-2.06379	2.97e-12
2	9279574	9280074	AT2G21730	+	494	2	9272908	9273408	AT2G21730	+	58	Yes	NA	6666	6	0.070444	600	-7.61415	1	2	0.070444	200	-1.33093	376	59	-3.00493	400	2	NA	NA	2.12249	4.51e-24
1	4843482	4843982	AT1G14170	+	109	1	4828453	4828953	AT1G14170	+	1729	NA	Yes	15029	8	0.070444	800	-11.6902	1	1	0.070444	100	-0.455537	93	1407	-9.56391	700	-4	-1.68784	2.21e-08	NA	NA
2	18077394	18077894	AT2G43570	+	119	2	18068967	18069467	AT2G43570	+	1207	NA	Yes	8427	7	0.070444	700	-9.52583	1	1	0.070444	100	-0.456449	131	1123	-7.5086	600	-2	-3.20947	9.91e-06	7.79011	7.95e-35
1	8890037	8890537	AT1G25350	+	59	1	8877609	8878109	AT1G25350	+	1383	NA	Yes	12428	7	0.070444	700	-9.66691	1	4	0.070444	400	-4.03536	47	1088	-1.57185	300	2	NA	NA	NA	NA
2	1080098	1080598	AT2G03560	+	758	2	1070538	1071038	AT2G03560	+	115	Yes	NA	9560	10	0.070444	1000	-16.3373	0.02394	1	0.070444	100	-0.455843	668	103	-13.9828	900	-6	NA	NA	NA	NA
1	27775575	27776075	AT1G73860	+	1276	1	27753543	27754043	AT1G73860	+	102	Yes	NA	22032	6	0.070444	600	-7.53199	1	1	0.070444	100	-0.454379	1114	68	-5.7057	500	2	-3.81201	1.95e-28	-2.78275	5.81e-06
1	24117669	24118169	AT1G64920	+	890	1	24108445	24108945	AT1G64920	+	50	Yes	NA	9224	7	0.070444	700	-9.71906	1	2	0.070444	200	-1.33097	1002	39	-4.28245	500	2	-6.31698	8.5e-47	NA	NA
1	28449917	28450417	AT1G75770	+	57	1	28439524	28440024	AT1G75770	+	1376	NA	Yes	10393	11	0.070444	1100	-19.2764	0.001526	3	0.070444	300	-2.54558	50	1288	-7.30097	800	-6	1.64836	1.15e-10	1.20886	1.17e-22
2	12625865	12626365	AT2G29452	+	113	2	12619534	12620034	AT2G29452	+	1539	NA	Yes	6331	8	0.070444	800	-11.6828	1	4	0.070444	400	-3.99584	103	1288	-2.23942	400	4	NA	NA	NA	NA
1	12287940	12288440	AT1G33850	+	1097	1	12267456	12267956	AT1G33850	+	194	Yes	Yes	20484	6	0.070444	600	-7.48219	1	2	0.070444	200	-1.33089	837	235	-2.95879	400	2	NA	NA	8.12702	6.44e-42
1	24130001	24130501	AT1G64960	+	70	1	24117675	24118175	AT1G64960	+	890	NA	Yes	12326	6	0.070444	600	-7.58112	1	1	0.070444	100	-0.453883	61	1002	-5.71704	500	2	0.488482	0.00482482	-6.31698	8.5e-47
1	24945040	24945540	AT1G66870	+	158	1	24936037	24936537	AT1G66870	+	1285	Yes	Yes	9003	7	0.070444	700	-9.49264	1	1	0.070444	100	-0.456499	134	1028	-7.50677	600	-2	NA	NA	4.34791	5.96e-71
1	18926578	18927078	AT1G51060	+	178	1	18913404	18913904	AT1G51060	+	1092	NA	Yes	13174	6	0.070444	600	-7.4871	1	3	0.070444	300	-2.53006	143	1086	-1.6986	300	2	-0.467086	0.0255635	NA	NA
1	8022941	8023441	AT1G22670	+	51	1	7988142	7988642	AT1G22670	+	1314	NA	Yes	34799	6	0.070444	600	-7.64097	1	1	0.070444	100	-0.453156	53	1277	-5.73382	500	2	NA	NA	NA	NA
2	10725447	10725947	AT2G25180	+	111	2	10710884	10711384	AT2G25180	+	1611	NA	Yes	14563	6	0.070444	600	-7.52339	1	1	0.070444	100	-0.454618	72	1686	-5.70024	500	2	NA	NA	-6.13048	2.15e-28
1	23888600	23889100	AT1G64370	+	837	1	23878481	23878981	AT1G64370	+	110	Yes	NA	10119	6	0.070444	600	-7.52428	1	3	0.070444	300	-2.53383	778	98	-1.70325	300	2	0.975519	0.00583792	NA	NA
2	11570473	11570973	AT2G27090	+	146	2	11564000	11564500	AT2G27090	+	1059	Yes	Yes	6473	9	0.070444	900	-13.8967	0.233303	2	0.070444	200	-1.3309	179	739	-6.90484	700	4	NA	NA	-0.785787	0.0238146
1	3901707	3902207	AT1G11600	+	484	1	3884398	3884898	AT1G11600	+	306	Yes	NA	17309	6	0.070444	600	-7.46232	1	2	0.070444	200	-1.33089	426	313	-2.95508	400	2	3.72042	2.28e-55	NA	NA
1	24706513	24707013	AT1G66280	+	206	1	24698517	24699017	AT1G66280	+	633	Yes	Yes	7996	9	0.070444	900	-13.8377	0.243292	4	0.070444	400	-3.98302	171	530	-3.01537	500	4	-5.95777	6.66e-28	NA	NA
1	29193520	29194020	AT1G77680	+	117	1	29186963	29187463	AT1G77680	+	1650	Yes	Yes	6557	7	0.070444	700	-9.52815	1	2	0.070444	200	-1.3309	104	1565	-4.1653	500	2	-0.480897	0.00504695	-0.645079	0.000129322
1	8640981	8641481	AT1G24360	+	75	1	8636034	8636534	AT1G24360	+	794	NA	Yes	4947	7	0.070444	700	-9.60634	1	2	0.070444	200	-1.33092	74	734	-4.19268	500	2	0.375082	8.78e-05	0.359846	0.0110819
1	29946898	29947398	AT1G79590	+	70	1	29942991	29943491	AT1G79590	+	1031	NA	Yes	3907	14	0.070444	1400	-27.3343	1e-06	6	0.070444	600	-7.60769	60	1013	-5.17063	800	10	NA	NA	-4.56014	3.25e-15
1	11036467	11036967	AT1G30950	+	597	1	11001506	11002006	AT1G30950	+	1183	Yes	Yes	34961	7	0.070444	700	-9.41959	1	2	0.070444	200	-1.33089	478	1080	-4.11431	500	2	NA	NA	0.630715	1.69e-07
3	672996	673496	AT3G02990	+	504	3	668083	668583	AT3G02990	+	1227	NA	Yes	4913	12	0.070444	1200	-21.0186	0.000273	7	0.070444	700	-9.42559	485	1163	-2.33333	500	8	-1.50317	4.11e-15	NA	NA
1	12871914	12872414	AT1G35170	+	495	1	12867995	12868495	AT1G35170	+	76	Yes	NA	3919	12	0.070444	1200	-21.6833	0.000153	4	0.070444	400	-4.02242	586	57	-6.30269	800	8	NA	NA	-0.554151	0.000152345
2	18364666	18365166	AT2G44490	+	1694	2	18358060	18358560	AT2G44490	+	133	Yes	Yes	6606	10	0.070444	1000	-16.2917	0.024779	5	0.070444	500	-5.66024	1681	128	-2.74571	500	6	0.9889	7.06e-10	NA	NA
1	1891470	1891970	AT1G06190	+	78	1	1883021	1883521	AT1G06190	+	1113	NA	Yes	8449	8	0.070444	800	-11.7738	1	5	0.070444	500	-5.78549	38	1022	-1.48329	300	4	2.67063	3.52e-145	NA	NA
1	22678443	22678943	AT1G61470	+	1236	1	22671427	22671927	AT1G61470	+	71	Yes	NA	7016	6	0.070444	600	-7.57889	1	1	0.070444	100	-0.455757	1062	100	-5.67452	500	2	2.55431	1.17e-09	NA	NA
1	23505532	23506032	AT1G63380	+	98	1	23502034	23502534	AT1G63380	+	676	NA	Yes	3498	11	0.070444	1100	-18.8999	0.002141	4	0.070444	400	-4.0047	81	543	-5.02779	700	6	-1.05811	0.00723108	6.1313	8.9e-119
1	16871551	16872051	AT1G44575	+	379	1	16852439	16852939	AT1G44575	+	1085	Yes	Yes	19112	10	0.070444	1000	-16.1069	0.028705	2	0.070444	200	-1.3309	223	911	-8.44475	800	-6	7.31204	5.73e-226	NA	NA
2	13116455	13116955	AT2G30780	+	122	2	13100987	13101487	AT2G30780	+	1187	NA	Yes	15468	7	0.070444	700	-9.52251	1	3	0.070444	300	-2.53602	83	1439	-2.52333	400	2	-0.372064	0.0025436	-4.80841	9.43e-13
1	7588602	7589102	AT1G21640	+	56	1	7569096	7569596	AT1G21640	+	1821	NA	Yes	19506	6	0.070444	600	-7.6211	1	1	0.070444	100	-0.45372	59	1796	-5.72079	500	2	1.43177	1.17e-64	1.08199	9.45e-07
1	21698984	21699484	AT1G58400	+	770	1	21662437	21662937	AT1G58400	+	77	Yes	NA	36547	6	0.070444	600	-7.56677	1	0	0.070444	0	1.01079	817	47	1.01079	600	2	-2.8033	4.34e-08	NA	NA
1	4276156	4276656	AT1G12560	+	87	1	4275316	4275816	AT1G12560	+	577	NA	Yes	840	10	0.070444	1000	-16.4476	0.021982	2	0.070444	200	-1.33091	79	526	-8.6355	800	-6	-5.96845	4.51e-42	NA	NA
2	9325572	9326072	AT2G21880	+	823	2	9319532	9320032	AT2G21880	+	98	Yes	NA	6040	6	0.070444	600	-7.53633	1	2	0.070444	200	-1.3309	888	115	-2.97455	400	2	NA	NA	2.84846	3.37e-57
1	4132583	4133083	AT1G12190	+	205	1	4125090	4125590	AT1G12190	+	1475	Yes	Yes	7493	7	0.070444	700	-9.46966	1	2	0.070444	200	-1.3309	185	1128	-4.13647	500	2	NA	NA	NA	NA
2	14394939	14395439	AT2G34110	+	1015	2	14382532	14383032	AT2G34110	+	74	Yes	NA	12407	7	0.070444	700	-9.60933	1	1	0.070444	100	-0.45372	783	59	-7.61086	600	-2	NA	NA	-0.842852	1.08e-09
2	7255961	7256461	AT2G16720	+	826	2	7244557	7245057	AT2G16720	+	79	Yes	NA	11404	8	0.070444	800	-11.77	1	3	0.070444	300	-2.53919	573	68	-3.5017	500	4	-3.48769	1.24e-76	-1.43673	8.81e-12
2	15290065	15290565	AT2G36430	+	972	2	15279529	15280029	AT2G36430	+	96	Yes	NA	10536	10	0.070444	1000	-16.4048	0.022739	1	0.070444	100	-0.454248	793	66	-14.1517	900	-6	NA	NA	-1.04106	0.00210162
1	10209480	10209980	AT1G29200	+	109	1	10194388	10194888	AT1G29200	+	1562	NA	Yes	15092	6	0.070444	600	-7.52518	1	4	0.070444	400	-3.99553	104	1333	-0.991181	200	2	-1.57029	1.19e-05	NA	NA
2	16465863	16466363	AT2G39435	+	217	2	16458598	16459098	AT2G39435	+	1273	NA	Yes	7265	9	0.070444	900	-13.8305	0.244586	5	0.070444	500	-5.64626	177	1077	-2.03744	400	4	-1.99683	7.6e-09	NA	NA
1	3076983	3077483	AT1G09530	+	92	1	3066479	3066979	AT1G09530	+	821	Yes	Yes	10504	8	0.070444	800	-11.7288	1	1	0.070444	100	-0.454979	79	741	-9.59518	700	-4	3.53192	1.98e-29	4.35477	3.1e-05
1	11437072	11437572	AT1G31870	+	97	1	11436185	11436685	AT1G31870	+	192	NA	Yes	887	7	0.070444	700	-9.55668	1	5	0.070444	500	-5.67387	101	208	-0.957108	200	2	NA	NA	0.40373	0.00371995
2	13909439	13909939	AT2G32795	+	1421	2	13896082	13896582	AT2G32795	+	100	Yes	NA	13357	7	0.070444	700	-9.55165	1	1	0.070444	100	-0.455396	1007	89	-7.54756	600	-2	2.7413	5.12e-18	5.79567	2.31e-14
2	19394962	19395462	AT2G47240	+	91	2	19387579	19388079	AT2G47240	+	1354	NA	Yes	7383	21	0.070444	2100	-48.6213	0	6	0.070444	600	-7.57462	73	1178	-13.6664	1500	-18	4.27502	5.33e-198	1.30184	0.000224934
2	15982469	15982969	AT2G38150	+	69	2	15935021	15935521	AT2G38150	+	1417	NA	Yes	47448	6	0.070444	600	-7.58342	1	1	0.070444	100	-0.452448	47	1511	-5.75034	500	2	NA	NA	-1.52191	1.56e-10
1	13026991	13027491	AT1G35420	+	1706	1	12977602	12978102	AT1G35420	+	1459	Yes	Yes	49389	6	0.128724	328.346	-7.43541	1	1	0.095451	73.8006	-0.458453	1390	1311	-3.96641	254.545	2	4.69578	7.33e-264	3.01565	1.3e-84
1	29137069	29137569	AT1G77530	+	152	1	29130128	29130628	AT1G77530	+	1177	NA	Yes	6941	17	0.070444	1700	-35.2744	0	11	0.070444	1100	-18.7552	138	1026	-2.47969	600	12	-6.06941	8.03e-22	-5.28121	3.1e-17
1	10209007	10209507	AT1G29200	+	118	1	10199080	10199580	AT1G29200	+	1031	NA	Yes	9927	6	0.070444	600	-7.51763	1	1	0.070444	100	-0.455571	94	962	-5.67871	500	2	-1.57029	1.19e-05	-5.07639	4.11e-23
1	8574919	8575419	AT1G24210	+	173	1	8571508	8572008	AT1G24210	+	1678	NA	Yes	3411	53	0.070444	5300	-169.935	0	40	0.070444	4000	-117.503	134	1498	-4.10321	1300	66	1.2625	0.000492631	NA	NA
2	7928516	7929016	AT2G18220	+	116	2	7922013	7922513	AT2G18220	+	898	NA	Yes	6503	6	0.070444	600	-7.5192	1	2	0.070444	200	-1.33091	90	777	-2.9833	400	2	NA	NA	-2.32078	1.38e-42
2	14200386	14200886	AT2G33530	+	805	2	14194562	14195062	AT2G33530	+	525	Yes	Yes	5824	6	0.070444	600	-7.44807	1	1	0.070444	100	-0.458272	722	722	-5.61906	500	2	1.23058	1.75e-08	NA	NA
1	12007963	12008463	AT1G33110	+	50	1	11997437	11997937	AT1G33110	+	690	NA	Yes	10526	9	0.070444	900	-14.3083	0.168807	5	0.070444	500	-5.77623	40	679	-2.12802	400	4	1.05053	5.71e-06	NA	NA
1	27137827	27138327	AT1G72130	+	820	1	27130600	27131100	AT1G72130	+	207	Yes	NA	7227	6	0.070444	600	-7.47877	1	3	0.070444	300	-2.52786	663	196	-1.69591	300	2	NA	NA	NA	NA
2	14964507	14965007	AT2G35620	+	1865	2	14936939	14937439	AT2G35620	+	1089	Yes	Yes	27568	6	0.105035	402.401	-7.43782	1	3	0.098206	215.191	-2.52299	1674	1120	-1.69005	187.21	2	0.568751	7.35e-07	-3.1167	1.73e-21
3	607009	607509	AT3G02800	+	414	3	605392	605892	AT3G02800	+	1809	Yes	Yes	1617	64	0.070444	6400	-211.141	0	29	0.070444	2900	-73.4491	319	1490	-19.3329	3500	-82	-2.17614	3.02e-07	NA	NA
1	24442030	24442530	AT1G65730	+	336	1	24439999	24440499	AT1G65730	+	119	Yes	NA	2031	8	0.070444	800	-11.6727	1	1	0.070444	100	-0.456047	218	111	-9.5356	700	-4	-2.97413	9.29e-27	NA	NA
1	1828713	1829213	AT1G06040	+	354	1	1825068	1825568	AT1G06040	+	215	Yes	NA	3645	6	0.070444	600	-7.47687	1	1	0.070444	100	-0.457165	332	193	-5.64325	500	2	2.1941	1.29e-28	NA	NA
1	24682991	24683491	AT1G66235	+	955	1	24671400	24671900	AT1G66235	+	925	Yes	Yes	11591	18	0.070444	1800	-37.4901	0	11	0.070444	1100	-18.4703	839	871	-2.90556	700	14	NA	NA	NA	NA
2	9341349	9341849	AT2G21910	+	1403	2	9318393	9318893	AT2G21910	+	145	Yes	NA	22956	6	0.070444	600	-7.50071	1	3	0.070444	300	-2.53095	1463	129	-1.69969	300	2	NA	NA	2.84846	3.37e-57
1	20370003	20370503	AT1G54550	+	1070	1	20360368	20360868	AT1G54550	+	92	Yes	NA	9635	6	0.070444	600	-7.54357	1	2	0.070444	200	-1.33091	1130	86	-2.98518	400	2	NA	NA	-1.09291	2.46e-14
1	19454918	19455418	AT1G52230	+	1311	1	19418123	19418623	AT1G52230	+	697	Yes	Yes	36795	6	0.070444	600	-7.44318	1	1	0.070444	100	-0.45826	1052	701	-5.61932	500	2	7.73435	4.08e-198	-1.04026	2.39e-14
2	13814538	13815038	AT2G32540	+	1008	2	13809052	13809552	AT2G32540	+	414	Yes	Yes	5486	13	0.070444	1300	-23.6408	2.3e-05	5	0.070444	500	-5.62555	817	415	-5.26713	800	8	4.39237	9.4e-44	4.52586	1.33e-66
1	4845002	4845502	AT1G14170	+	91	1	4829992	4830492	AT1G14170	+	1563	NA	Yes	15010	6	0.070444	600	-7.54487	1	1	0.070444	100	-0.455241	85	1385	-5.68614	500	2	-1.68784	2.21e-08	NA	NA
1	22429655	22430155	AT1G60920	+	746	1	22427010	22427510	AT1G60920	+	106	Yes	NA	2645	16	0.070444	1600	-32.6651	0	9	0.070444	900	-14.1668	677	64	-3.50978	700	12	NA	NA	NA	NA
1	4144373	4144873	AT1G12220	+	120	1	4125696	4126196	AT1G12220	+	988	NA	Yes	18677	6	0.070444	600	-7.51611	1	1	0.070444	100	-0.455571	94	657	-5.67871	500	2	NA	NA	-5.32593	7.91e-45
2	1079431	1079931	AT2G03560	+	1228	2	1072967	1073467	AT2G03560	+	94	Yes	NA	6464	15	0.070444	1500	-29.8692	0	7	0.070444	700	-9.58277	1051	84	-4.66666	800	10	NA	NA	NA	NA
2	12592500	12593000	AT2G29320	+	1553	2	12563499	12563999	AT2G29320	+	84	Yes	NA	29001	12	0.070444	1200	-21.6051	0.000165	1	0.070444	100	-0.455025	1211	80	-19.0149	1100	-8	0.990224	0.000675469	-5.86261	1.94e-12
2	7311536	7312036	AT2G16870	+	1105	2	7303013	7303513	AT2G16870	+	62	Yes	NA	8523	8	0.070444	800	-11.8515	1	5	0.070444	500	-5.73144	1353	54	-1.46784	300	4	-1.49655	2.33e-16	1.12736	9.34e-06
2	18076997	18077497	AT2G43570	+	255	2	18071018	18071518	AT2G43570	+	1282	NA	Yes	5979	12	0.070444	1200	-21.1289	0.000248	8	0.070444	800	-11.5906	212	1067	-1.71336	400	8	-3.20947	9.91e-06	-2.87708	1.5e-16
2	9280872	9281372	AT2G21730	+	646	2	9277577	9278077	AT2G21730	+	93	Yes	Yes	3295	10	0.070444	1000	-16.4181	0.022502	6	0.070444	600	-7.52518	649	109	-1.91839	400	6	NA	NA	NA	NA
1	27775556	27776056	AT1G73860	+	1276	1	27757008	27757508	AT1G73860	+	1028	Yes	Yes	18548	12	0.070444	1200	-20.9618	0.000287	6	0.070444	600	-7.43839	1114	1027	-3.16681	600	8	-3.81201	1.95e-28	0.456714	0.000542257
1	21686512	21687012	AT1G58370	+	150	1	21676444	21676944	AT1G58370	+	984	NA	Yes	10068	9	0.070444	900	-13.8913	0.234218	3	0.070444	300	-2.53272	108	813	-4.53587	600	4	-1.48741	2.12e-41	1.76611	2.64e-19
1	24117618	24118118	AT1G64920	+	890	1	24110004	24110504	AT1G64920	+	101	Yes	NA	7614	10	0.070444	1000	-16.3845	0.023101	5	0.070444	500	-5.70024	1002	72	-2.79549	500	6	-6.31698	8.5e-47	-1.04223	0.000866905
2	9280594	9281094	AT2G21730	+	506	2	9278853	9279353	AT2G21730	+	72	Yes	Yes	1741	6	0.070444	600	-7.57672	1	2	0.070444	200	-1.3309	493	111	-2.97568	400	2	NA	NA	NA	NA
3	516012	516512	AT3G02493	+	421	3	513508	514008	AT3G02493	+	115	Yes	NA	2504	14	0.070444	1400	-26.8369	1e-06	6	0.070444	600	-7.53747	265	97	-4.98755	800	10	-3.92929	7.08e-06	NA	NA
1	12287562	12288062	AT1G33850	+	439	1	12277989	12278489	AT1G33850	+	755	Yes	Yes	9573	11	0.070444	1100	-18.5203	0.002932	7	0.070444	700	-9.4324	400	888	-1.78554	400	6	NA	NA	NA	NA
1	24129976	24130476	AT1G64960	+	70	1	24121568	24122068	AT1G64960	+	1184	NA	Yes	8408	9	0.070444	900	-14.1244	0.198387	5	0.070444	500	-5.71704	61	1028	-2.08512	400	4	0.488482	0.00482482	-5.42571	4.25e-14
1	2204491	2204991	AT1G07180	+	1979	1	2195033	2195533	AT1G07180	+	63	Yes	NA	9458	9	0.070444	900	-14.1747	0.190301	7	0.070444	700	-9.59518	1645	79	-0.913347	200	4	7.05513	6.95e-94	NA	NA
1	12265036	12265536	AT1G33810	+	116	1	12256456	12256956	AT1G33810	+	1209	NA	Yes	8580	7	0.070444	700	-9.52933	1	4	0.070444	400	-4.00228	86	1075	-1.55555	300	2	2.25781	3.84e-47	NA	NA
1	28216589	28217089	AT1G75180	+	120	1	28209558	28210058	AT1G75180	+	1005	Yes	Yes	7031	6	0.070444	600	-7.51611	1	1	0.070444	100	-0.455815	102	898	-5.67323	500	2	1.83352	1.74e-72	-3.40784	0.000344258
1	599058	599558	AT1G02740	+	114	1	593460	593960	AT1G02740	+	482	NA	Yes	5598	8	0.070444	800	-11.681	1	2	0.070444	200	-1.33091	89	369	-5.52019	600	4	NA	NA	0.273879	0.0305953
1	3902434	3902934	AT1G11600	+	1722	1	3890475	3890975	AT1G11600	+	72	Yes	Yes	11959	7	0.070444	700	-9.61557	1	1	0.070444	100	-0.455468	1686	91	-7.54487	600	-2	3.72042	2.28e-55	-3.75507	2.6e-34
1	23888901	23889401	AT1G64370	+	916	1	23881445	23881945	AT1G64370	+	123	Yes	NA	7456	10	0.070444	1000	-16.3153	0.024343	2	0.070444	200	-1.3309	801	104	-8.56292	800	-6	0.975519	0.00583792	NA	NA
2	8998465	8998965	AT2G20920	+	93	2	8987951	8988451	AT2G20920	+	1282	NA	Yes	10514	9	0.070444	900	-14.0146	0.215385	8	0.070444	800	-11.7462	86	1201	-0.590776	100	4	2.28956	4.5e-53	3.6414	2.43e-217
1	7924965	7925465	AT1G22450	+	203	1	7921735	7922235	AT1G22450	+	397	NA	Yes	3230	6	0.070444	600	-7.47978	1	3	0.070444	300	-2.52765	203	318	-1.69566	300	2	-0.641126	2.34e-20	2.77395	2.1e-46
1	24945501	24946001	AT1G66870	+	1012	1	24939585	24940085	AT1G66870	+	947	Yes	Yes	5916	26	0.070444	2600	-62.5444	0	18	0.070444	1800	-37.4817	980	992	-2.71146	800	24	NA	NA	NA	NA
1	29195014	29195514	AT1G77680	+	919	1	29189457	29189957	AT1G77680	+	109	Yes	NA	5557	7	0.070444	700	-9.53827	1	2	0.070444	200	-1.33091	909	99	-4.16867	500	2	-0.480897	0.00504695	0.477373	0.00210049
1	24706558	24707058	AT1G66280	+	206	1	24702536	24703036	AT1G66280	+	556	Yes	Yes	4022	9	0.070444	900	-13.8377	0.243292	3	0.070444	300	-2.52873	171	524	-4.49617	600	4	-5.95777	6.66e-28	-5.78626	5.83e-25
1	23888893	23889393	AT1G64370	+	916	1	23886434	23886934	AT1G64370	+	108	Yes	NA	2459	20	0.070444	2000	-44.9902	0	13	0.070444	1300	-24.2682	801	89	-2.90752	700	16	0.975519	0.00583792	4.11628	1.73e-62
3	675147	675647	AT3G02990	+	75	3	670022	670522	AT3G02990	+	912	NA	Yes	5125	6	0.070444	600	-7.57058	1	1	0.070444	100	-0.455358	88	967	-5.68349	500	2	-1.50317	4.11e-15	NA	NA
2	16501320	16501820	AT2G39550	+	1421	2	16488961	16489461	AT2G39550	+	196	Yes	NA	12359	6	0.070444	600	-7.48164	1	2	0.070444	200	-1.3309	1300	171	-2.9644	400	2	-0.564106	1.11e-09	NA	NA
1	26282522	26283022	AT1G69818	+	67	1	26278963	26279463	AT1G69818	+	1166	NA	Yes	3559	9	0.070444	900	-14.1446	0.195119	4	0.070444	400	-4.01757	62	1065	-3.09567	500	4	NA	NA	-4.50118	8.25e-96
1	11000609	11001109	AT1G30910	+	903	1	10994463	10994963	AT1G30910	+	103	Yes	NA	6146	16	0.070444	1600	-32.6977	0	11	0.070444	1100	-18.9215	920	94	-2.02376	500	12	0.630715	1.69e-07	-0.298984	0.0357412
1	1144976	1145476	AT1G04280	+	58	1	1136070	1136570	AT1G04280	+	1565	NA	Yes	8906	6	0.070444	600	-7.61415	1	1	0.070444	100	-0.450531	36	1287	-5.79584	500	2	0.685303	0.023472	-2.0687	4.62e-43
1	22678065	22678565	AT1G61470	+	752	1	22673066	22673566	AT1G61470	+	122	Yes	NA	4999	6	0.070444	600	-7.51464	1	4	0.070444	400	-3.99406	648	109	-0.991175	200	2	2.55431	1.17e-09	1.38708	4.13e-06
1	29538483	29538983	AT1G78520	+	98	1	29532051	29532551	AT1G78520	+	986	NA	Yes	6432	8	0.070444	800	-11.7136	1	4	0.070444	400	-3.99715	99	939	-2.24104	400	4	-4.46161	1.66e-13	NA	NA
3	1113030	1113530	AT3G04230	+	160	3	1107568	1108068	AT3G04230	+	1640	NA	Yes	5462	24	0.070444	2400	-57.4189	0	20	0.070444	2000	-44.4555	154	1356	-1.31587	400	22	-1.12847	0.000154949	8.79886	1.52e-68
1	18478664	18479164	AT1G49910	+	647	1	18477474	18477974	AT1G49910	+	84	Yes	NA	1190	8	0.070444	800	-11.7526	1	3	0.070444	300	-2.53656	560	80	-3.48501	500	4	NA	NA	NA	NA
1	12969948	12970448	AT1G35333	+	81	1	12956484	12956984	AT1G35333	+	1579	NA	Yes	13464	8	0.070444	800	-11.7628	1	6	0.070444	600	-7.55806	82	1776	-0.932369	200	4	NA	NA	NA	NA
1	987484	987984	AT1G03880	+	199	1	977081	977581	AT1G03880	+	1901	NA	Yes	10403	7	0.070444	700	-9.47198	1	6	0.070444	600	-7.48918	172	1805	-0.584871	100	2	NA	NA	-2.24126	9.76e-08
2	9324970	9325470	AT2G21880	+	354	2	9322602	9323102	AT2G21880	+	1494	Yes	Yes	2368	39	0.070444	3900	-109.674	0	22	0.070444	2200	-50.0145	366	1397	-7.09178	1700	-42	NA	NA	-0.54699	5.3e-07
1	18182997	18183497	AT1G49170	+	222	1	18169072	18169572	AT1G49170	+	1561	NA	Yes	13925	6	0.070444	600	-7.47532	1	2	0.070444	200	-1.3309	164	1564	-2.96528	400	2	NA	NA	NA	NA
1	4133015	4133515	AT1G12190	+	1660	1	4127541	4128041	AT1G12190	+	431	Yes	Yes	5474	20	0.070444	2000	-43.6915	0	4	0.070444	400	-3.97211	1736	397	-17.0548	1600	-16	NA	NA	-5.32593	7.91e-45
2	13116534	13117034	AT2G30780	+	122	2	13108421	13108921	AT2G30780	+	933	NA	Yes	8113	11	0.070444	1100	-18.8013	0.002319	5	0.070444	500	-5.68801	83	768	-3.59573	600	6	-0.372064	0.0025436	6.639	4.85e-101
2	14394945	14395445	AT2G34110	+	1015	2	14386504	14387004	AT2G34110	+	109	Yes	NA	8441	10	0.070444	1000	-16.356	0.023604	2	0.070444	200	-1.33093	783	60	-8.73415	800	-6	NA	NA	0.76097	0.000167993
2	7255578	7256078	AT2G16720	+	1024	2	7248563	7249063	AT2G16720	+	56	Yes	NA	7015	9	0.070444	900	-14.2384	0.179936	5	0.070444	500	-5.75687	842	45	-2.11367	400	4	-3.48769	1.24e-76	-0.373185	0.0139073
1	3402900	3403400	AT1G10385	+	677	1	3389485	3389985	AT1G10385	+	90	Yes	NA	13415	6	0.070444	600	-7.5462	1	2	0.070444	200	-1.33091	570	81	-2.98781	400	2	NA	NA	NA	NA
2	7389420	7389920	AT2G17000	+	75	2	7376605	7377105	AT2G17000	+	1300	NA	Yes	12815	9	0.070444	900	-14.0945	0.203183	3	0.070444	300	-2.5426	57	1260	-4.63763	600	4	NA	NA	-5.23475	1.82e-40
2	16466464	16466964	AT2G39435	+	116	2	16460039	16460539	AT2G39435	+	569	NA	Yes	6425	9	0.070444	900	-13.9498	0.225221	2	0.070444	200	-1.3309	106	613	-6.96869	700	-4	-1.99683	7.6e-09	-3.04459	1.58e-19
2	15290031	15290531	AT2G36430	+	972	2	15288524	15289024	AT2G36430	+	92	Yes	NA	1507	15	0.070444	1500	-29.8932	0	9	0.070444	900	-14.089	793	76	-2.79123	600	10	NA	NA	-0.804658	1.07e-07
1	10208987	10209487	AT1G29200	+	118	1	10200529	10201029	AT1G29200	+	1456	NA	Yes	8458	10	0.070444	1000	-16.3287	0.024094	5	0.070444	500	-5.67871	94	1499	-2.76839	500	6	-1.57029	1.19e-05	-4.65168	4.17e-19
2	15144060	15144560	AT2G36060	+	171	2	15124537	15125037	AT2G36060	+	1270	NA	Yes	19523	6	0.070444	600	-7.48954	1	1	0.070444	100	-0.455999	109	1139	-5.66911	500	2	NA	NA	NA	NA
2	10822447	10822947	AT2G25430	+	87	2	10801362	10801862	AT2G25430	+	1852	NA	Yes	21085	6	0.070444	600	-7.55039	1	5	0.070444	500	-5.67871	94	1745	-0.572142	100	2	NA	NA	NA	NA
1	23332980	23333480	AT1G62980	+	263	1	23328959	23329459	AT1G62980	+	1668	NA	Yes	4021	52	0.070444	5200	-162.557	0	22	0.070444	2200	-50.4581	212	1502	-18.5276	3000	-62	-6.12073	1.95e-75	NA	NA
2	13910020	13910520	AT2G32795	+	1153	2	13900061	13900561	AT2G32795	+	82	Yes	NA	9959	9	0.070444	900	-14.0591	0.208687	3	0.070444	300	-2.53552	1249	86	-4.56417	600	4	2.7413	5.12e-18	NA	NA
2	1064452	1064952	AT2G03505	+	1394	2	1027973	1028473	AT2G03505	+	944	Yes	NA	36479	7	0.070444	700	-9.41007	1	3	0.070444	300	-2.52345	1465	776	-2.48258	400	2	-3.1745	1.48e-15	NA	NA
1	25007017	25007517	AT1G67000	+	1192	1	24997048	24997548	AT1G67000	+	74	Yes	NA	9969	9	0.070444	900	-14.1002	0.2023	1	0.070444	100	-0.454248	1194	66	-11.8283	800	-4	NA	NA	7.38135	0
1	21190021	21190521	AT1G56553	+	171	1	21181993	21182493	AT1G56553	+	553	NA	Yes	8028	8	0.070444	800	-11.6156	1	1	0.070444	100	-0.456304	123	601	-9.52144	700	-4	NA	NA	0.944678	1.14e-05
1	13026920	13027420	AT1G35420	+	1706	1	12984531	12985031	AT1G35420	+	898	Yes	Yes	42389	8	0.079229	711.294	-11.5122	1	0	0.070444	0	1.00077	1390	650	1.00077	711.294	4	4.69578	7.33e-264	2.34229	7.01e-17
2	12487409	12487909	AT2G29070	+	154	2	12478480	12478980	AT2G29070	+	1827	NA	Yes	8929	8	0.070444	800	-11.6299	1	0	0	0	0	0	0	0	800	4	-1.36314	8.52e-11	-0.305132	0.00528616
1	24749051	24749551	AT1G66350	+	185	1	24724057	24724557	AT1G66350	+	1659	NA	Yes	24994	7	0.070444	700	-9.47799	1	1	0.070444	100	-0.456692	147	1841	-7.49971	600	-2	NA	NA	NA	NA
2	17665041	17665541	AT2G42430	+	93	2	17657932	17658432	AT2G42430	+	1538	NA	Yes	7109	11	0.070444	1100	-18.9272	0.002094	5	0.070444	500	-5.68706	84	1295	-3.59382	600	6	-4.30137	2.05e-46	NA	NA
2	13296514	13297014	AT2G31210	+	148	2	13277865	13278365	AT2G31210	+	1052	NA	Yes	18649	6	0.070444	600	-7.49922	1	2	0.070444	200	-1.3309	140	1276	-2.969	400	2	NA	NA	0.558765	0.0307742
2	13910361	13910861	AT2G32795	+	1626	2	13902920	13903420	AT2G32795	+	59	Yes	NA	7441	10	0.070444	1000	-16.6701	0.018131	3	0.070444	300	-2.5426	1406	57	-5.87751	700	6	2.7413	5.12e-18	NA	NA
1	24724118	24724618	AT1G66310	+	1659	1	24709543	24710043	AT1G66310	+	1095	Yes	Yes	14575	6	0.093948	449.889	-7.43776	1	1	0.107232	65.6929	-0.458413	1841	1112	-7.43762	384.196	-2	NA	NA	-5.95777	6.66e-28
1	17934875	17935375	AT1G48510	+	1769	1	17922566	17923066	AT1G48510	+	51	Yes	NA	12309	9	0.070444	900	-14.2954	0.17083	0	0	0	0	0	0	0	900	4	-5.76486	9.75e-30	-0.806554	1.96e-10
2	14199558	14200058	AT2G33530	+	1262	2	14196510	14197010	AT2G33530	+	780	Yes	Yes	3048	33	0.070444	3300	-86.6707	0	19	0.070444	1900	-40.5042	1012	719	-5.644	1400	34	1.23058	1.75e-08	NA	NA
1	5987050	5987550	AT1G17440	+	49	1	5978426	5978926	AT1G17440	+	834	NA	Yes	8624	8	0.070444	800	-11.9546	1	5	0.070444	500	-5.76791	42	919	-1.47816	300	4	0.24453	0.033447	4.61661	3.52e-14
1	26447517	26448017	AT1G70220	+	1837	1	26434053	26434553	AT1G70220	+	106	Yes	NA	13464	22	0.070444	2200	-51.5757	0	9	0.070444	900	-13.9498	1833	116	-8.40231	1300	-20	NA	NA	2.51255	1.44e-71
1	4057963	4058463	AT1G12013	+	77	1	4048492	4048992	AT1G12013	+	1420	NA	Yes	9471	6	0.070444	600	-7.56677	1	3	0.070444	300	-2.53844	71	1269	-1.70901	300	2	NA	NA	NA	NA
1	27137898	27138398	AT1G72130	+	820	1	27132057	27132557	AT1G72130	+	1566	Yes	Yes	5841	24	0.070444	2400	-56.0563	0	12	0.070444	1200	-20.9918	663	1574	-5.88516	1200	22	NA	NA	-3.18708	3.23e-11
1	23531960	23532460	AT1G63450	+	1496	1	23511603	23512103	AT1G63450	+	431	Yes	Yes	20357	6	0.070444	600	-7.4524	1	4	0.070444	400	-3.97111	1457	452	-0.991117	200	2	-5.30359	8.88e-32	-5.8903	4.11e-31
1	10629504	10630004	AT1G30210	+	706	1	10626066	10626566	AT1G30210	+	120	Yes	NA	3438	14	0.070444	1400	-26.8058	1e-06	3	0.070444	300	-2.53536	626	87	-11.6046	1100	-10	2.68153	6.76e-07	NA	NA
1	24281935	24282435	AT1G65360	+	1093	1	24265997	24266497	AT1G65360	+	90	Yes	NA	15938	7	0.070444	700	-9.56977	1	3	0.070444	300	-2.53462	1101	92	-2.51871	400	2	NA	NA	NA	NA
1	24683024	24683524	AT1G66235	+	955	1	24677133	24677633	AT1G66235	+	83	Yes	NA	5891	7	0.070444	700	-9.58513	1	1	0.070444	100	-0.455603	839	95	-7.53983	600	-2	NA	NA	1.77547	2.7e-10
1	8322945	8323445	AT1G23440	+	58	1	8315490	8315990	AT1G23440	+	776	NA	Yes	7455	7	0.070444	700	-9.67187	1	3	0.070444	300	-2.54	65	652	-2.53666	400	2	-1.09277	3.15e-06	NA	NA
2	9341468	9341968	AT2G21910	+	1403	2	9322584	9323084	AT2G21910	+	1494	Yes	Yes	18884	23	0.108401	1494.63	-52.7301	0	9	0.107055	592.214	-13.7179	1463	1397	-8.70994	902.418	-20	NA	NA	-0.54699	5.3e-07
1	20369441	20369941	AT1G54550	+	878	1	20363972	20364472	AT1G54550	+	1312	Yes	Yes	5469	15	0.070444	1500	-28.9398	0	8	0.070444	800	-11.5105	964	1211	-3.39425	700	10	NA	NA	2.52108	2.46e-128
1	4298596	4299096	AT1G12630	+	1392	1	4288087	4288587	AT1G12630	+	54	Yes	NA	10509	7	0.070444	700	-9.69361	1	2	0.070444	200	-1.33097	1203	40	-4.27753	500	2	NA	NA	-1.20254	0.00208693
1	27927457	27927957	AT1G74260	+	55	1	27914987	27915487	AT1G74260	+	1322	NA	Yes	12470	11	0.070444	1100	-19.3104	0.001477	3	0.070444	300	-2.54558	50	1201	-7.30097	800	-6	0.306897	0.000399809	NA	NA
1	21146459	21146959	AT1G56460	+	1199	1	21141071	21141571	AT1G56460	+	63	Yes	NA	5388	7	0.070444	700	-9.64875	1	3	0.070444	300	-2.54223	1109	58	-2.54422	400	2	NA	NA	-0.414272	0.00311281
1	26447445	26447945	AT1G70220	+	1837	1	26438981	26439481	AT1G70220	+	59	Yes	Yes	8464	10	0.070444	1000	-16.6701	0.018131	5	0.070444	500	-5.68898	1833	82	-2.78123	500	6	NA	NA	NA	NA
1	8312544	8313044	AT1G23400	+	104	1	8302361	8302861	AT1G23400	+	711	Yes	Yes	10183	6	0.070444	600	-7.52995	1	0	0.070444	0	1.00829	61	604	1.00829	600	2	3.13327	8.15e-138	-1.21602	2.63e-14
2	1153611	1154111	AT2G03780	+	83	2	1132182	1132682	AT2G03780	+	973	NA	Yes	21429	6	0.070444	600	-7.55645	1	1	0.070444	100	-0.4552	84	893	-5.68706	500	2	0.928888	7.5e-14	-5.46429	2.26e-29
3	207431	207931	AT3G01516	+	198	3	201943	202443	AT3G01516	+	1693	NA	Yes	5488	20	0.070444	2000	-44.1858	0	9	0.070444	900	-13.8592	179	1376	-6.31012	1100	16	-4.03975	1.18e-15	-5.85526	3.45e-20
1	4144403	4144903	AT1G12220	+	120	1	4129032	4129532	AT1G12220	+	1745	NA	Yes	15371	7	0.070444	700	-9.52471	1	6	0.070444	600	-7.54105	94	1590	-0.580466	100	2	NA	NA	NA	NA
1	1689038	1689538	AT1G05640	+	817	1	1683944	1684444	AT1G05640	+	54	Yes	NA	5094	12	0.070444	1200	-22.0294	0.00011	7	0.070444	700	-9.83019	736	38	-2.56675	500	8	-0.852887	8.73e-06	1.33603	1.16e-17
1	18198495	18198995	AT1G49200	+	1900	1	18171969	18172469	AT1G49200	+	979	Yes	Yes	26526	7	0.096197	512.597	-9.40949	1	1	0.080939	87.0329	-0.458346	1748	884	-5.61746	425.565	2	NA	NA	NA	NA
1	27756904	27757404	AT1G73820	+	1028	1	27744516	27745016	AT1G73820	+	91	Yes	NA	12388	6	0.070444	600	-7.54487	1	5	0.070444	500	-5.68898	1027	82	-0.570851	100	2	0.456714	0.000542257	NA	NA
1	19137632	19138132	AT1G51610	+	33	1	19126037	19126537	AT1G51610	+	1555	NA	Yes	11595	6	0.070444	600	-7.76652	1	2	0.070444	200	-1.33098	38	1347	-3.04118	400	2	1.4851	1.88e-51	1.00216	2.39e-10
2	7311077	7311577	AT2G16870	+	863	2	7305061	7305561	AT2G16870	+	57	Yes	NA	6016	7	0.070444	700	-9.677	1	1	0.070444	100	-0.451161	740	39	-7.71089	600	-2	-1.49655	2.33e-16	0.536525	0.00380778
1	26883427	26883927	AT1G71320	+	59	1	26872487	26872987	AT1G71320	+	1351	NA	Yes	10940	8	0.070444	800	-11.871	1	3	0.070444	300	-2.54956	43	1334	-3.56949	500	4	NA	NA	NA	NA
2	129039	129539	AT2G01240	+	65	2	115430	115930	AT2G01240	+	1516	NA	Yes	13609	6	0.070444	600	-7.59334	1	5	0.070444	500	-5.77623	40	1526	-0.559832	100	2	NA	NA	-0.881761	0.00655093
1	25184442	25184942	AT1G67270	+	57	1	25176124	25176624	AT1G67270	+	1163	NA	Yes	8318	6	0.070444	600	-7.61756	1	2	0.070444	200	-1.33094	49	656	-3.01808	400	2	NA	NA	2.70933	0.00029177
1	22714974	22715474	AT1G61563	+	728	1	22711939	22712439	AT1G61563	+	1947	Yes	Yes	3035	32	0.073303	3075.16	-83.1766	0	18	0.070444	1800	-37.5133	801	1509	-5.21832	1275.16	32	NA	NA	-4.43037	2.98e-47
1	12287901	12288401	AT1G33850	+	1097	1	12280039	12280539	AT1G33850	+	389	Yes	Yes	7862	7	0.070444	700	-9.4335	1	4	0.070444	400	-3.97311	837	354	-1.54188	300	2	NA	NA	NA	NA
1	10287484	10287984	AT1G29390	+	1586	1	10280544	10281044	AT1G29390	+	30	Yes	NA	6940	10	0.070444	1000	-17.4076	0.00881	2	0.070444	200	-1.33109	1538	25	-9.38952	800	-6	2.62238	2.53e-32	NA	NA
1	24945527	24946027	AT1G66870	+	1012	1	24942022	24942522	AT1G66870	+	668	Yes	Yes	3505	31	0.070444	3100	-79.7232	0	16	0.070444	1600	-31.7767	980	644	-6.94023	1500	-30	NA	NA	NA	NA
1	18927099	18927599	AT1G51060	+	88	1	18920492	18920992	AT1G51060	+	1196	NA	Yes	6607	6	0.070444	600	-7.54896	1	3	0.070444	300	-2.53243	111	1272	-1.70151	300	2	-0.467086	0.0255635	NA	NA
1	2204478	2204978	AT1G07180	+	1979	1	2198093	2198593	AT1G07180	+	55	Yes	NA	6385	10	0.070444	1000	-16.7218	0.017279	2	0.070444	200	-1.33096	1645	44	-8.89031	800	-6	7.05513	6.95e-94	1.5079	0.00404302
1	3902538	3903038	AT1G11600	+	1722	1	3892493	3892993	AT1G11600	+	115	Yes	NA	10045	7	0.070444	700	-9.53054	1	4	0.070444	400	-4.00321	1686	84	-1.556	300	2	3.72042	2.28e-55	NA	NA
1	26735989	26736489	AT1G70920	+	119	1	26725578	26726078	AT1G70920	+	1780	NA	Yes	10411	7	0.070444	700	-9.52583	1	1	0.070444	100	-0.455571	94	1646	-7.54105	600	-2	-2.27898	9.04e-10	NA	NA
1	7924948	7925448	AT1G22450	+	203	1	7922480	7922980	AT1G22450	+	1099	NA	Yes	2468	39	0.070444	3900	-111.327	0	15	0.070444	1500	-29.298	203	957	-16.0225	2400	-42	-0.641126	2.34e-20	-5.47066	1.86e-30
1	11036579	11037079	AT1G30950	+	597	1	11015000	11015500	AT1G30950	+	1176	Yes	Yes	21579	10	0.070444	1000	-16.0713	0.02954	1	0.070444	100	-0.458066	478	1101	-13.7574	900	-6	NA	NA	NA	NA
2	12211518	12212018	AT2G28520	+	60	2	12200575	12201075	AT2G28520	+	1071	NA	Yes	10943	15	0.070444	1500	-30.5179	0	7	0.070444	700	-9.98071	29	861	-5.51626	800	12	-0.492179	9.76e-13	-1.30587	1.02e-10
2	12318044	12318544	AT2G28700	+	1300	2	12298466	12298966	AT2G28700	+	68	Yes	NA	19578	6	0.070444	600	-7.58578	1	0	0.070444	0	1.00993	1264	51	1.00993	600	2	-4.83799	3.55e-18	-0.73357	0.000276783
2	16502955	16503455	AT2G39550	+	490	2	16492864	16493364	AT2G39550	+	811	Yes	Yes	10091	14	0.070444	1400	-26.2843	2e-06	3	0.070444	300	-2.52448	457	846	-11.1361	1100	-10	-0.564106	1.11e-09	NA	NA
1	22678529	22679029	AT1G61470	+	1236	1	22676442	22676942	AT1G61470	+	65	Yes	NA	2087	9	0.070444	900	-14.1591	0.192781	7	0.070444	700	-9.61557	1062	72	-0.913404	200	4	2.55431	1.17e-09	NA	NA
1	21713536	21714036	AT1G58440	+	532	1	21698451	21698951	AT1G58440	+	1048	Yes	Yes	15085	6	0.070444	600	-7.44781	1	3	0.070444	300	-2.52447	460	1020	-1.69181	300	2	NA	NA	-2.8033	4.34e-08
1	147440	147940	AT1G01380	+	1080	1	136078	136578	AT1G01380	+	82	Yes	NA	11362	7	0.070444	700	-9.58755	1	5	0.070444	500	-5.71888	874	60	-0.957299	200	2	NA	NA	NA	NA
2	13117554	13118054	AT2G30780	+	58	2	13111828	13112328	AT2G30780	+	1286	NA	Yes	5726	10	0.070444	1000	-16.6823	0.017925	4	0.070444	400	-4.01584	64	1168	-4.03589	600	6	-0.372064	0.0025436	NA	NA
3	1113088	1113588	AT3G04230	+	160	3	1111563	1112063	AT3G04230	+	822	NA	Yes	1525	25	0.070444	2500	-60.7956	0	20	0.070444	2000	-44.4555	154	696	-1.61876	500	22	-1.12847	0.000154949	-3.36061	1.1e-07
2	8338480	8338980	AT2G19210	+	87	2	8329848	8330348	AT2G19210	+	1017	NA	Yes	8632	12	0.070444	1200	-21.5797	0.000168	4	0.070444	400	-4.00865	74	993	-6.19293	800	8	NA	NA	1.20009	0.00736079
1	26275326	26275826	AT1G69800	+	1047	1	26251962	26252462	AT1G69800	+	60	Yes	NA	23364	6	0.070444	600	-7.60769	1	4	0.070444	400	-4.02242	919	57	-0.991346	200	2	NA	NA	NA	NA
1	21698482	21698982	AT1G58400	+	1048	1	21685054	21685554	AT1G58400	+	103	Yes	NA	13428	6	0.070444	600	-7.53096	1	2	0.070444	200	-1.33092	1020	73	-2.99279	400	2	-2.8033	4.34e-08	-1.48741	2.12e-41
2	11934554	11935054	AT2G28030	+	1820	2	11918551	11919051	AT2G28030	+	62	Yes	NA	16003	6	0.070444	600	-7.60166	1	2	0.070444	200	-1.33096	1752	44	-3.02705	400	2	NA	NA	0.604344	5.44e-07
2	19476600	19477100	AT2G47460	+	849	2	19458102	19458602	AT2G47460	+	66	Yes	NA	18498	7	0.070444	700	-9.63664	1	1	0.070444	100	-0.451702	987	42	-7.68942	600	-2	-4.13586	4.33e-26	NA	NA
1	4132564	4133064	AT1G12190	+	205	1	4128591	4129091	AT1G12190	+	1472	Yes	Yes	3973	13	0.070444	1300	-23.8103	1.9e-05	1	0.070444	100	-0.4571	185	1314	-21.2147	1200	-8	NA	NA	NA	NA
1	1736485	1736985	AT1G05790	+	71	1	1726449	1726949	AT1G05790	+	1780	NA	Yes	10036	8	0.070444	800	-11.8033	1	2	0.070444	200	-1.33091	83	1523	-5.52954	600	4	0.707361	8.75e-10	0.600188	0.000423251
2	14394927	14395427	AT2G34110	+	1015	2	14387051	14387551	AT2G34110	+	115	Yes	NA	7876	8	0.070444	800	-11.6793	1	2	0.070444	200	-1.33091	783	87	-5.52316	600	4	NA	NA	0.769274	0.0154954
1	24568081	24568581	AT1G65985	+	955	1	24559937	24560437	AT1G65985	+	119	Yes	NA	8144	9	0.070444	900	-13.9432	0.226134	2	0.070444	200	-1.33091	865	77	-7.02938	700	-4	-2.07679	3.41e-16	-1.24898	2.8e-26
1	22719857	22720357	AT1G61575	+	93	1	22711912	22712412	AT1G61575	+	1947	NA	Yes	7945	6	0.070444	600	-7.5423	1	5	0.070444	500	-5.67452	100	1509	-0.572668	100	2	NA	NA	-4.43037	2.98e-47
1	3157346	3157846	AT1G09750	+	1157	1	3139581	3140081	AT1G09750	+	53	Yes	NA	17765	6	0.070444	600	-7.63255	1	0	0.070444	0	1.01271	712	40	1.01271	600	2	4.68049	3.07e-215	NA	NA
1	22719887	22720387	AT1G61575	+	93	1	22714604	22715104	AT1G61575	+	902	NA	Yes	5283	6	0.070444	600	-7.5423	1	4	0.070444	400	-3.99682	100	921	-0.991187	200	2	NA	NA	NA	NA
1	1734415	1734915	AT1G05790	+	75	1	1730533	1731033	AT1G05790	+	1262	NA	Yes	3882	12	0.070444	1200	-21.6943	0.000152	4	0.070444	400	-4.02038	59	1354	-6.28612	800	8	0.707361	8.75e-10	-0.88673	0.00378558
1	8234143	8234643	AT1G23205	+	1906	1	8198958	8199458	AT1G23205	+	124	Yes	NA	35185	6	0.070444	600	-7.51322	1	4	0.070444	400	-3.99821	1750	96	-0.991193	200	2	NA	NA	-3.36471	8.38e-26
1	21120098	21120598	AT1G56415	+	83	1	21113356	21113856	AT1G56415	+	1181	NA	Yes	6742	9	0.070444	900	-14.0546	0.209368	3	0.070444	300	-2.53869	70	1298	-4.59667	600	4	NA	NA	NA	NA
1	24973981	24974481	AT1G66940	+	1797	1	24959990	24960490	AT1G66940	+	217	Yes	NA	13991	10	0.070444	1000	-16.1806	0.027016	3	0.070444	300	-2.52824	1354	184	-5.66107	700	6	8.30084	2.68e-136	0.893988	1.29e-10
1	7004000	7004500	AT1G20200	+	1120	1	6975500	6976000	AT1G20200	+	1077	Yes	Yes	28500	8	0.070444	800	-11.5082	1	5	0.070444	500	-5.61728	1096	906	-1.43796	300	4	-0.252284	0.00221683	3.34095	3.13e-05
1	3076422	3076922	AT1G09530	+	510	1	3071371	3071871	AT1G09530	+	112	Yes	NA	5051	8	0.070444	800	-11.6846	1	3	0.070444	300	-2.53095	477	129	-3.4501	500	4	3.53192	1.98e-29	0.383578	0.00904693
1	486992	487492	AT1G02400	+	1749	1	462975	463475	AT1G02400	+	93	Yes	NA	24017	7	0.070444	700	-9.56391	1	5	0.070444	500	-5.67655	1418	97	-0.957117	200	2	NA	NA	NA	NA
1	25884528	25885028	AT1G68850	+	764	1	25868969	25869469	AT1G68850	+	146	Yes	NA	15559	6	0.070444	600	-7.50021	1	1	0.070444	100	-0.455667	714	97	-5.67655	500	2	-5.38412	9.03e-35	-0.869165	0.0013736
1	21189988	21190488	AT1G56553	+	171	1	21187515	21188015	AT1G56553	+	1497	NA	Yes	2473	23	0.070444	2300	-53.9869	0	14	0.070444	1400	-26.7884	123	1270	-3.84744	900	20	NA	NA	-4.21576	6.53e-15
2	18531488	18531988	AT2G44930	+	84	2	18525111	18525611	AT2G44930	+	1962	NA	Yes	6377	20	0.070444	2000	-45.5254	0	10	0.070444	1000	-16.5863	67	1566	-5.6585	1000	16	7.2065	1.65e-10	5.88317	4.03e-100
2	16922662	16923162	AT2G40520	+	690	2	16916592	16917092	AT2G40520	+	135	Yes	NA	6070	6	0.070444	600	-7.50617	1	2	0.070444	200	-1.3309	526	147	-2.96778	400	2	5.15635	7.36e-78	NA	NA
1	10208602	10209102	AT1G29200	+	109	1	10202380	10202880	AT1G29200	+	645	NA	Yes	6222	7	0.070444	700	-9.53827	1	2	0.070444	200	-1.33091	101	548	-4.16728	500	2	-1.57029	1.19e-05	-2.0248	2.69e-12
2	9795413	9795913	AT2G23000	+	69	2	9778908	9779408	AT2G23000	+	592	NA	Yes	16505	6	0.070444	600	-7.58342	1	1	0.070444	100	-0.453883	61	604	-5.71704	500	2	3.85127	3.64e-25	3.78752	3.68e-16
2	12487572	12488072	AT2G29070	+	154	2	12482910	12483410	AT2G29070	+	710	NA	Yes	4662	6	0.070444	600	-7.49641	1	1	0.070444	100	-0.456692	147	926	-5.6537	500	2	-1.36314	8.52e-11	-4.19752	1.67e-50
2	15062960	15063460	AT2G35880	+	59	2	15049157	15049657	AT2G35880	+	1645	NA	Yes	13803	6	0.070444	600	-7.61086	1	0	0.070444	0	1.00754	67	1565	1.00754	600	2	0.707082	0.00274217	-2.48051	1.93e-21
1	25861454	25861954	AT1G68810	+	601	1	25838533	25839033	AT1G68810	+	1711	Yes	Yes	22921	8	0.070444	800	-11.524	1	4	0.070444	400	-3.96966	566	1431	-2.20787	400	4	-0.652097	0.0410063	0.268	0.0151746
1	22070124	22070624	AT1G59950	+	918	1	22062473	22062973	AT1G59950	+	58	Yes	NA	7651	7	0.070444	700	-9.67187	1	1	0.070444	100	-0.452939	804	51	-7.64097	600	-2	NA	NA	NA	NA
1	8658133	8658633	AT1G24430	+	873	1	8652965	8653465	AT1G24430	+	137	Yes	NA	5168	14	0.070444	1400	-26.7176	1e-06	5	0.070444	500	-5.65797	995	134	-6.44015	900	10	-5.40194	3.52e-19	5.83633	1.09e-61
1	27987015	27987515	AT1G74458	+	261	1	27975178	27975678	AT1G74458	+	1780	NA	Yes	11837	7	0.070444	700	-9.4532	1	4	0.070444	400	-3.97797	232	1299	-1.54411	300	2	-3.11638	1.13e-18	3.05097	1.86e-18
2	7942013	7942513	AT2G18260	+	356	2	7939945	7940445	AT2G18260	+	1856	NA	Yes	2068	95	0.070444	9500	-355.369	0	73	0.070444	7300	-253.158	313	1706	-5.58316	2200	138	3.02405	1.67e-25	NA	NA
1	24723968	24724468	AT1G66310	+	1659	1	24713988	24714488	AT1G66310	+	1322	Yes	Yes	9980	10	0.113424	621.065	-16.0375	0.030334	6	0.141368	298.979	-7.43537	1841	1466	-3.60462	322.086	6	NA	NA	NA	NA
2	18380582	18381082	AT2G44520	+	50	2	18364608	18365108	AT2G44520	+	1694	NA	Yes	15974	7	0.070444	700	-9.71906	1	2	0.070444	200	-1.33093	56	1681	-4.22402	500	2	-0.433487	1.85e-06	0.9889	7.06e-10
1	25861883	25862383	AT1G68810	+	364	1	25841453	25841953	AT1G68810	+	370	Yes	Yes	20430	6	0.070444	600	-7.45686	1	3	0.070444	300	-2.52553	366	323	-1.69309	300	2	-0.652097	0.0410063	-3.6222	1.09e-21
1	29745017	29745517	AT1G79070	+	155	1	29741533	29742033	AT1G79070	+	1302	NA	Yes	3484	22	0.070444	2200	-50.8583	0	10	0.070444	1000	-16.2772	140	1001	-6.90809	1200	-20	NA	NA	0.379746	0.0102956
1	22689397	22689897	AT1G61500	+	1987	1	22677034	22677534	AT1G61500	+	382	Yes	NA	12363	12	0.070444	1200	-21.0544	0.000265	6	0.070444	600	-7.45327	1681	416	-3.18385	600	8	1.16092	1.61e-10	NA	NA
2	11401485	11401985	AT2G26760	+	78	2	11393218	11393718	AT2G26760	+	399	NA	Yes	8267	6	0.070444	600	-7.56493	1	1	0.070444	100	-0.454109	64	361	-5.71187	500	2	NA	NA	5.03452	1.67e-138
1	2030499	2030999	AT1G06630	+	38	1	2026003	2026503	AT1G06630	+	973	NA	Yes	4496	9	0.070444	900	-14.5216	0.137466	2	0.070444	200	-1.33099	36	952	-7.30194	700	-4	NA	NA	-3.37003	6.46e-24
1	23531905	23532405	AT1G63450	+	1496	1	23516481	23516981	AT1G63450	+	110	Yes	NA	15424	12	0.070444	1200	-21.433	0.000191	2	0.070444	200	-1.33091	1457	85	-12.1569	1000	-8	-5.30359	8.88e-32	NA	NA
1	24520508	24521008	AT1G65910	+	95	1	24513544	24514044	AT1G65910	+	1235	NA	Yes	6964	7	0.070444	700	-9.56022	1	6	0.070444	600	-7.53864	96	1196	-0.580671	100	2	NA	NA	NA	NA
1	24281970	24282470	AT1G65360	+	1093	1	24268525	24269025	AT1G65360	+	121	Yes	NA	13445	6	0.070444	600	-7.51537	1	3	0.070444	300	-2.53147	1101	122	-1.70033	300	2	NA	NA	NA	NA
2	6694519	6695019	AT2G15360	+	63	2	6689015	6689515	AT2G15360	+	1440	NA	Yes	5504	18	0.070444	1800	-39.7677	0	9	0.070444	900	-14.2489	55	1532	-5.20632	900	14	NA	NA	NA	NA
1	7407949	7408449	AT1G21160	+	114	1	7387943	7388443	AT1G21160	+	1512	NA	Yes	20006	6	0.070444	600	-7.52083	1	2	0.070444	200	-1.33091	97	1516	-2.98038	400	2	NA	NA	-3.56669	2.86e-12
2	18132041	18132541	AT2G43750	+	88	2	18112447	18112947	AT2G43750	+	861	NA	Yes	19594	6	0.070444	600	-7.54896	1	2	0.070444	200	-1.33092	68	764	-2.99653	400	2	1.46742	9.58e-42	0.589157	0.0110368
1	8321561	8322061	AT1G23440	+	51	1	8317074	8317574	AT1G23440	+	634	NA	Yes	4487	6	0.070444	600	-7.64097	1	1	0.070444	100	-0.452021	44	531	-5.76038	500	2	-1.09277	3.15e-06	NA	NA
2	9341837	9342337	AT2G21910	+	479	2	9325428	9325928	AT2G21910	+	823	Yes	Yes	16409	7	0.070444	700	-9.42599	1	1	0.070444	100	-0.458113	518	888	-7.44834	600	-2	NA	NA	NA	NA
1	24281500	24282000	AT1G65360	+	1379	1	24271458	24271958	AT1G65360	+	151	Yes	NA	10042	15	0.070444	1500	-29.4636	0	9	0.070444	900	-13.8812	1366	158	-2.68855	600	10	NA	NA	NA	NA
1	20369984	20370484	AT1G54550	+	1070	1	20366445	20366945	AT1G54550	+	825	Yes	Yes	3539	33	0.070444	3300	-86.635	0	11	0.070444	1100	-18.469	1130	860	-15.6817	2200	-34	NA	NA	-2.85996	1.97e-09
1	12604883	12605383	AT1G34470	+	1622	1	12584987	12585487	AT1G34470	+	919	Yes	Yes	19896	7	0.077089	639.656	-9.41052	1	5	0.070444	500	-5.61811	1410	810	-0.957012	139.656	2	0.308855	0.0056356	-3.07253	3.66e-22
1	4298618	4299118	AT1G12630	+	1392	1	4290448	4290948	AT1G12630	+	72	Yes	NA	8170	8	0.070444	800	-11.7987	1	5	0.070444	500	-5.69774	1203	74	-1.45864	300	4	NA	NA	3.04178	0.0360559
1	26967503	26968003	AT1G71696	+	719	1	26945459	26945959	AT1G71696	+	1187	Yes	Yes	22044	9	0.070444	900	-13.7372	0.262665	4	0.070444	400	-3.96874	674	1150	-2.98375	500	4	-0.547997	0.00389807	NA	NA
1	25444955	25445455	AT1G67860	+	499	1	25440539	25441039	AT1G67860	+	89	Yes	NA	4416	7	0.070444	700	-9.57181	1	2	0.070444	200	-1.33091	546	102	-4.16661	500	2	8.17116	4.78e-52	1.13068	1.54e-06
1	21146471	21146971	AT1G56460	+	1199	1	21143580	21144080	AT1G56460	+	94	Yes	NA	2891	21	0.070444	2100	-48.5415	0	5	0.070444	500	-5.69313	1109	78	-16.4516	1600	-18	NA	NA	-0.206501	0.0081991
1	7396209	7396709	AT1G21120	+	1122	1	7377483	7377983	AT1G21120	+	128	Yes	NA	18726	8	0.070444	800	-11.6594	1	1	0.070444	100	-0.455815	1207	102	-9.54847	700	-4	-2.93972	7.6e-12	0.642836	0.00317279
2	10993405	10993905	AT2G25770	+	467	2	10988617	10989117	AT2G25770	+	139	Yes	NA	4788	6	0.070444	600	-7.50389	1	4	0.070444	400	-3.99378	567	110	-0.991174	200	2	NA	NA	0.345556	0.000434362
1	4070422	4070922	AT1G12040	+	151	1	4065129	4065629	AT1G12040	+	1452	NA	Yes	5293	21	0.070444	2100	-47.6621	0	13	0.070444	1300	-23.9849	136	1178	-3.35824	800	18	-5.94267	8.41e-54	5.19074	1.99e-26
1	9544537	9545037	AT1G27480	+	1910	1	9533980	9534480	AT1G27480	+	46	Yes	NA	10557	6	0.070444	600	-7.66541	1	4	0.070444	400	-4.05565	1804	37	-0.991688	200	2	6.13433	6.42e-162	NA	NA
1	25444568	25445068	AT1G67860	+	302	1	25442924	25443424	AT1G67860	+	521	Yes	Yes	1644	7	0.070444	700	-9.44506	1	6	0.070444	600	-7.46012	327	403	-0.58733	100	2	8.17116	4.78e-52	NA	NA
2	1079484	1079984	AT2G03560	+	1228	2	1077019	1077519	AT2G03560	+	642	Yes	Yes	2465	60	0.070444	6000	-192.367	0	32	0.070444	3200	-83.2663	1051	641	-11.9196	2800	-74	NA	NA	7.51852	9.71e-120
1	19000374	19000874	AT1G51240	+	1133	1	18977992	18978492	AT1G51240	+	1154	Yes	Yes	22382	7	0.070444	700	-9.40735	1	0	0.070444	0	1.00045	1102	1114	1.00045	700	2	NA	NA	-4.76997	3.53e-11
2	15072585	15073085	AT2G35910	+	134	2	15049022	15049522	AT2G35910	+	1645	NA	Yes	23563	6	0.070444	600	-7.50677	1	1	0.070444	100	-0.455281	86	1565	-5.68523	500	2	-2.65799	2.38e-15	-2.48051	1.93e-21
1	12287959	12288459	AT1G33850	+	1097	1	12283439	12283939	AT1G33850	+	933	Yes	Yes	4520	26	0.070444	2600	-62.5493	0	15	0.070444	1500	-28.9449	837	1335	-4.55621	1100	24	NA	NA	NA	NA
1	6994909	6995409	AT1G20170	+	123	1	6975929	6976429	AT1G20170	+	1329	NA	Yes	18980	7	0.070444	700	-9.52144	1	1	0.070444	100	-0.455786	101	1216	-7.53304	600	-2	NA	NA	3.34095	3.13e-05
2	11526455	11526955	AT2G27010	+	264	2	11524093	11524593	AT2G27010	+	713	Yes	Yes	2362	20	0.070444	2000	-43.9546	0	6	0.070444	600	-7.46243	305	843	-11.2205	1400	-16	-5.39978	1.35e-28	-5.41539	3.96e-51
1	2204074	2204574	AT1G07180	+	1018	1	2200986	2201486	AT1G07180	+	35	Yes	NA	3088	7	0.070444	700	-9.87097	1	2	0.070444	200	-1.33107	752	26	-4.38572	500	2	7.05513	6.95e-94	NA	NA
1	25524513	25525013	AT1G68110	+	146	1	25521916	25522416	AT1G68110	+	702	NA	Yes	2597	19	0.070444	1900	-41.3922	0	8	0.070444	800	-11.7343	90	651	-7.04748	1100	-16	3.64175	3.65e-15	-0.685109	2.28e-08
2	13511947	13512447	AT2G31770	+	139	2	13509040	13509540	AT2G31770	+	1377	NA	Yes	2907	23	0.070444	2300	-54.3358	0	18	0.070444	1800	-38.2863	151	1254	-1.67385	500	20	NA	NA	NA	NA
1	2204114	2204614	AT1G07180	+	1018	1	2202449	2202949	AT1G07180	+	86	Yes	NA	1665	10	0.070444	1000	-16.4529	0.021891	4	0.070444	400	-4.00631	752	78	-3.99934	600	6	7.05513	6.95e-94	-3.85582	2.63e-05
2	12329904	12330404	AT2G28740	+	104	2	12318076	12318576	AT2G28740	+	1300	NA	Yes	11828	6	0.070444	600	-7.52995	1	3	0.070444	300	-2.54	65	1264	-1.71098	300	2	0.547429	0.000113092	-4.83799	3.55e-18
1	6051569	6052069	AT1G17590	+	483	1	6044999	6045499	AT1G17590	+	45	Yes	NA	6570	6	0.070444	600	-7.67099	1	1	0.070444	100	-0.452021	419	44	-5.76038	500	2	-1.66098	2.45e-15	0.699362	2.08e-05
2	16502967	16503467	AT2G39550	+	490	2	16497123	16497623	AT2G39550	+	1365	Yes	Yes	5844	11	0.070444	1100	-18.5094	0.00296	5	0.070444	500	-5.62415	457	1143	-3.47268	600	6	-0.564106	1.11e-09	NA	NA
1	29485037	29485537	AT1G78370	+	1562	1	29461506	29462006	AT1G78370	+	91	Yes	NA	23531	9	0.070444	900	-14.0219	0.214325	1	0.070444	100	-0.45372	1520	59	-11.871	800	-4	3.7878	2.01e-204	-0.747102	0.00033676
2	16492778	16493278	AT2G39510	+	811	2	16487545	16488045	AT2G39510	+	124	Yes	NA	5233	7	0.070444	700	-9.52038	1	1	0.070444	100	-0.455949	846	107	-7.52703	600	-2	NA	NA	NA	NA
1	26293544	26294044	AT1G69840	+	82	1	26279034	26279534	AT1G69840	+	1166	NA	Yes	14510	6	0.070444	600	-7.55806	1	3	0.070444	300	-2.53674	79	1065	-1.70688	300	2	1.62565	8.46e-12	-4.50118	8.25e-96
1	21716503	21717003	AT1G58440	+	1544	1	21704103	21704603	AT1G58440	+	321	Yes	Yes	12400	13	0.070444	1300	-23.6885	2.2e-05	3	0.070444	300	-2.52642	1222	259	-9.69405	1000	-8	NA	NA	-2.73487	1.22e-19
1	147342	147842	AT1G01380	+	1080	1	142098	142598	AT1G01380	+	67	Yes	NA	5244	7	0.070444	700	-9.63285	1	6	0.070444	600	-7.60166	874	62	-0.575287	100	2	NA	NA	-0.713243	1.19e-05
3	318018	318518	AT3G01920	+	102	3	313434	313934	AT3G01920	+	1752	NA	Yes	4584	12	0.070444	1200	-21.4762	0.000184	5	0.070444	500	-5.69537	76	1746	-4.52905	700	8	2.04191	6.45e-12	-5.31644	9.4e-16
2	11934534	11935034	AT2G28030	+	1820	2	11922452	11922952	AT2G28030	+	36	Yes	NA	12082	6	0.070444	600	-7.73621	1	3	0.070444	300	-2.54298	1752	56	-1.71477	300	2	NA	NA	4.76468	1.54e-26
1	21699075	21699575	AT1G58400	+	770	1	21689470	21689970	AT1G58400	+	109	Yes	NA	9605	7	0.070444	700	-9.53827	1	3	0.070444	300	-2.53448	817	93	-2.51825	400	2	-2.8033	4.34e-08	-0.744293	3.7e-08
1	29392508	29393008	AT1G78110	+	116	1	29374441	29374941	AT1G78110	+	1027	NA	Yes	18067	6	0.070444	600	-7.5192	1	3	0.070444	300	-2.53172	119	912	-1.70063	300	2	NA	NA	-2.32204	1.94e-25
2	19476566	19477066	AT2G47460	+	849	2	19462464	19462964	AT2G47460	+	57	Yes	NA	14102	15	0.070444	1500	-30.6166	0	7	0.070444	700	-9.76651	987	44	-5.01907	800	12	-4.13586	4.33e-26	NA	NA
1	987541	988041	AT1G03880	+	199	1	982510	983010	AT1G03880	+	1080	NA	Yes	5031	13	0.070444	1300	-23.8205	1.9e-05	5	0.070444	500	-5.64731	172	830	-5.3489	800	8	NA	NA	NA	NA
1	4133842	4134342	AT1G12190	+	486	1	4130086	4130586	AT1G12190	+	762	Yes	Yes	3756	7	0.070444	700	-9.42553	1	1	0.070444	100	-0.457855	355	665	-7.45759	600	-2	NA	NA	NA	NA
1	5051949	5052449	AT1G14690	+	71	1	5043111	5043611	AT1G14690	+	985	NA	Yes	8838	6	0.070444	600	-7.57889	1	3	0.070444	300	-2.53674	79	921	-1.70688	300	2	NA	NA	0.473578	6.52e-10
2	11817442	11817942	AT2G27710	+	75	2	11809032	11809532	AT2G27710	+	1227	NA	Yes	8410	8	0.070444	800	-11.7857	1	2	0.070444	200	-1.33096	42	1206	-5.67131	600	4	-0.337206	0.00207587	NA	NA
1	3403890	3404390	AT1G10385	+	857	1	3394045	3394545	AT1G10385	+	144	Yes	NA	9845	6	0.070444	600	-7.50122	1	3	0.070444	300	-2.53325	814	103	-1.70253	300	2	NA	NA	NA	NA
1	24973978	24974478	AT1G66940	+	1797	1	24962526	24963026	AT1G66940	+	800	Yes	Yes	11452	7	0.074347	663.246	-9.41302	1	1	0.070444	100	-0.45826	1354	701	-7.44309	563.246	-2	8.30084	2.68e-136	5.73694	4.28e-86
1	20830086	20830586	AT1G55720	+	1451	1	20802017	20802517	AT1G55720	+	1000	Yes	Yes	28069	7	0.07504	657.121	-9.40916	1	5	0.070444	500	-5.6176	1442	867	-0.957012	157.121	2	NA	NA	NA	NA
1	23937511	23938011	AT1G64440	+	1109	1	23923559	23924059	AT1G64440	+	89	Yes	NA	13952	8	0.070444	800	-11.7372	1	5	0.070444	500	-5.71526	1125	62	-1.46338	300	4	-0.853436	7.62e-09	-2.99437	2.74e-19
3	123976	124476	AT3G01330	+	98	3	114934	115434	AT3G01330	+	1005	NA	Yes	9042	6	0.070444	600	-7.53633	1	2	0.070444	200	-1.33092	72	853	-2.9935	400	2	NA	NA	NA	NA
1	29206593	29207093	AT1G77710	+	131	1	29202662	29203162	AT1G77710	+	665	NA	Yes	3931	8	0.070444	800	-11.6554	1	5	0.070444	500	-5.67323	102	683	-1.45216	300	4	NA	NA	-2.14842	7.45e-16
3	124126	124626	AT3G01330	+	98	3	115937	116437	AT3G01330	+	1090	NA	Yes	8189	7	0.070444	700	-9.55497	1	3	0.070444	300	-2.53821	72	991	-2.53064	400	2	NA	NA	NA	NA
2	8958562	8959062	AT2G20810	+	76	2	8955405	8955905	AT2G20810	+	1645	NA	Yes	3157	23	0.070444	2300	-55.9957	0	14	0.070444	1400	-27.2805	73	1660	-4.11094	900	22	NA	NA	NA	NA
3	126522	127022	AT3G01330	+	103	3	118651	119151	AT3G01330	+	779	NA	Yes	7871	6	0.070444	600	-7.53096	1	2	0.070444	200	-1.3309	110	787	-2.97598	400	2	NA	NA	NA	NA
2	16922908	16923408	AT2G40520	+	1351	2	16919560	16920060	AT2G40520	+	108	Yes	NA	3348	19	0.070444	1900	-41.8078	0	10	0.070444	1000	-16.3527	1257	110	-4.56817	900	16	5.15635	7.36e-78	NA	NA
1	10080568	10081068	AT1G28690	+	65	1	10055004	10055504	AT1G28690	+	1711	NA	Yes	25564	6	0.070444	600	-7.59334	1	1	0.070444	100	-0.454036	63	1289	-5.71353	500	2	NA	NA	4.4693	1.6e-30
2	10801382	10801882	AT2G25355	+	1852	2	10787485	10787985	AT2G25355	+	71	Yes	NA	13897	7	0.070444	700	-9.61882	1	4	0.070444	400	-4.01128	1745	70	-1.55989	300	2	NA	NA	NA	NA
1	22070070	22070570	AT1G59950	+	918	1	22066856	22067356	AT1G59950	+	78	Yes	NA	3214	12	0.070444	1200	-21.6621	0.000156	2	0.070444	200	-1.33092	804	71	-12.254	1000	-8	NA	NA	-5.11481	4.36e-11
1	22702470	22702970	AT1G61540	+	125	1	22689385	22689885	AT1G61540	+	1987	NA	Yes	13085	13	0.070444	1300	-24.0313	1.6e-05	2	0.070444	200	-1.33091	88	1681	-14.0575	1100	-8	NA	NA	1.16092	1.61e-10
1	13026980	13027480	AT1G35420	+	1706	1	13000046	13000546	AT1G35420	+	31	Yes	NA	26934	6	0.070444	600	-7.79028	1	4	0.070444	400	-4.08262	1390	29	-0.992081	200	2	4.69578	7.33e-264	NA	NA
1	5340081	5340581	AT1G15530	+	65	1	5338090	5338590	AT1G15530	+	582	NA	Yes	1991	6	0.070444	600	-7.59334	1	2	0.070444	200	-1.33094	51	536	-3.01502	400	2	0.648643	0.0211162	NA	NA
1	1073038	1073538	AT1G04130	+	106	1	1070427	1070927	AT1G04130	+	1516	NA	Yes	2611	26	0.070444	2600	-65.338	0	7	0.070444	700	-9.64875	63	1314	-19.0973	1900	-24	NA	NA	-0.795305	0.000113092
1	22692022	22692522	AT1G61500	+	258	1	22678489	22678989	AT1G61500	+	1236	Yes	Yes	13533	11	0.070444	1100	-18.5948	0.002752	1	0.070444	100	-0.457196	197	1062	-16.1983	1000	-6	1.16092	1.61e-10	2.55431	1.17e-09
2	13486048	13486548	AT2G31725	+	82	2	13482059	13482559	AT2G31725	+	954	NA	Yes	3989	10	0.070444	1000	-16.4756	0.021491	3	0.070444	300	-2.54121	61	806	-5.85579	700	6	-0.514969	0.0354493	NA	NA
1	429475	429975	AT1G02220	+	1251	1	421042	421542	AT1G02220	+	75	Yes	NA	8433	8	0.070444	800	-11.7857	1	1	0.070444	100	-0.45418	1139	65	-9.64054	700	-4	-2.83825	1.09e-35	4.55936	5.78e-28
2	9353534	9354034	AT2G21950	+	91	2	9347039	9347539	AT2G21950	+	1637	NA	Yes	6495	6	0.070444	600	-7.54487	1	0	0	0	0	0	0	0	600	2	NA	NA	NA	NA
2	17367571	17368071	AT2G41660	+	1352	2	17356936	17357436	AT2G41660	+	120	Yes	NA	10635	6	0.070444	600	-7.51611	1	3	0.070444	300	-2.53371	1155	99	-1.7031	300	2	-5.10929	1.61e-42	NA	NA
1	23532031	23532531	AT1G63450	+	1496	1	23525457	23525957	AT1G63450	+	110	Yes	NA	6574	7	0.070444	700	-9.53692	1	2	0.070444	200	-1.33091	1457	94	-4.17242	500	2	-5.30359	8.88e-32	NA	NA
1	22689459	22689959	AT1G61500	+	1987	1	22679520	22680020	AT1G61500	+	494	Yes	NA	9939	12	0.070444	1200	-21.0209	0.000273	4	0.070444	400	-3.97042	1681	500	-5.9093	800	8	1.16092	1.61e-10	NA	NA
1	23389943	23390443	AT1G63080	+	1039	1	23368484	23368984	AT1G63080	+	92	Yes	NA	21459	6	0.070444	600	-7.54357	1	0	0.070444	0	1.00664	865	76	1.00664	600	2	1.0909	3.19e-05	NA	NA
2	10320546	10321046	AT2G24260	+	103	2	10316094	10316594	AT2G24260	+	893	Yes	Yes	4452	15	0.070444	1500	-29.7735	0	4	0.070444	400	-4.00522	80	872	-10.1189	1100	-10	-3.36031	1.07e-36	NA	NA
1	998037	998537	AT1G03910	+	123	1	983348	983848	AT1G03910	+	1322	NA	Yes	14689	7	0.070444	700	-9.52144	1	1	0.070444	100	-0.456342	125	1049	-7.51253	600	-2	NA	NA	NA	NA
1	7412103	7412603	AT1G21160	+	75	1	7391000	7391500	AT1G21160	+	1461	NA	Yes	21103	6	0.070444	600	-7.57058	1	1	0.070444	100	-0.452021	44	1473	-5.76038	500	2	NA	NA	-3.32656	1.38e-24
1	20369961	20370461	AT1G54550	+	1070	1	20367988	20368488	AT1G54550	+	948	Yes	Yes	1973	39	0.070444	3900	-108.359	0	28	0.070444	2800	-69.2054	1130	1012	-3.24196	1100	42	NA	NA	-6.19378	5.4e-28
2	13891476	13891976	AT2G32760	+	172	2	13886961	13887461	AT2G32760	+	1041	NA	Yes	4515	23	0.070444	2300	-53.9782	0	12	0.070444	1200	-21.3676	125	973	-5.55139	1100	20	NA	NA	-3.00634	7.36e-05
1	12695583	12696083	AT1G34650	+	30	1	12657875	12658375	AT1G34650	+	1581	NA	Yes	37708	7	0.070444	700	-9.95904	1	1	0.070444	100	-0.445282	22	1498	-7.95778	600	-2	NA	NA	NA	NA
1	22115409	22115909	AT1G60030	+	114	1	22080677	22081177	AT1G60030	+	868	NA	Yes	34732	6	0.070444	600	-7.52083	1	0	0.070444	0	1.00453	111	778	1.00453	600	2	-0.850004	0.000470154	0.46724	0.00830871
1	4298643	4299143	AT1G12630	+	1392	1	4296983	4297483	AT1G12630	+	142	Yes	NA	1660	39	0.070444	3900	-113.108	0	15	0.070444	1500	-30.0478	1203	81	-17.848	2400	-44	NA	NA	0.440002	0.00245127
1	12606462	12606962	AT1G34470	+	100	1	12588901	12589401	AT1G34470	+	1153	Yes	Yes	17561	6	0.070444	600	-7.53411	1	1	0.070444	100	-0.455815	102	1325	-5.67323	500	2	0.308855	0.0056356	1.12001	4.66e-23
1	30365822	30366322	AT1G80810	+	818	1	30358504	30359004	AT1G80810	+	165	Yes	NA	7318	10	0.070444	1000	-16.2357	0.025872	6	0.070444	600	-7.50502	838	137	-1.90992	400	6	0.472135	0.0385461	NA	NA
2	13747979	13748479	AT2G32390	+	112	2	13732030	13732530	AT2G32390	+	1227	NA	Yes	15949	7	0.070444	700	-9.5343	1	3	0.070444	300	-2.53224	113	1169	-2.51087	400	2	NA	NA	NA	NA
1	7396062	7396562	AT1G21120	+	1122	1	7381913	7382413	AT1G21120	+	96	Yes	NA	14149	6	0.070444	600	-7.53864	1	2	0.070444	200	-1.33091	1207	79	-2.98896	400	2	-2.93972	7.6e-12	NA	NA
1	19758928	19759428	AT1G53025	+	1793	1	19738486	19738986	AT1G53025	+	93	Yes	NA	20442	9	0.070444	900	-14.0146	0.215385	4	0.070444	400	-4.0037	1725	83	-3.06276	500	4	-0.737798	5.26e-06	NA	NA
1	22243463	22243963	AT1G60360	+	64	1	22223625	22224125	AT1G60360	+	1643	NA	Yes	19838	7	0.070444	700	-9.64458	1	5	0.070444	500	-5.72277	58	1678	-0.95732	200	2	-1.26204	0.000546354	1.03543	0.00451182
2	13667942	13668442	AT2G32170	+	82	2	13662535	13663035	AT2G32170	+	607	NA	Yes	5407	8	0.070444	800	-11.7593	1	1	0.070444	100	-0.453803	60	481	-9.66213	700	-4	NA	NA	2.37929	0.00857072
1	26970418	26970918	AT1G71696	+	131	1	26964077	26964577	AT1G71696	+	1304	Yes	Yes	6341	8	0.070444	800	-11.6554	1	1	0.070444	100	-0.455757	100	1013	-9.55165	700	-4	-0.547997	0.00389807	3.41473	8.33e-60
1	4144392	4144892	AT1G12220	+	120	1	4133353	4133853	AT1G12220	+	1554	NA	Yes	11039	6	0.070444	600	-7.51611	1	3	0.070444	300	-2.53435	94	1341	-1.70389	300	2	NA	NA	NA	NA
1	9544960	9545460	AT1G27480	+	993	1	9534911	9535411	AT1G27480	+	59	Yes	NA	10049	9	0.070444	900	-14.2091	0.184707	1	0.070444	100	-0.451702	677	42	-12.0388	800	-4	6.13433	6.42e-162	2.37561	2.38e-45
1	19418432	19418932	AT1G52155	+	671	1	19401510	19402010	AT1G52155	+	108	Yes	NA	16922	6	0.070444	600	-7.52609	1	2	0.070444	200	-1.33091	600	101	-2.9789	400	2	-1.04026	2.39e-14	NA	NA
1	9544877	9545377	AT1G27480	+	993	1	9538566	9539066	AT1G27480	+	90	Yes	NA	6311	12	0.070444	1200	-21.5561	0.000172	4	0.070444	400	-4.0235	677	56	-6.31148	800	8	6.13433	6.42e-162	NA	NA
2	12592010	12592510	AT2G29320	+	1430	2	12579986	12580486	AT2G29320	+	76	Yes	NA	12024	8	0.070444	800	-11.7816	1	3	0.070444	300	-2.53536	1127	87	-3.4775	500	4	0.990224	0.000675469	NA	NA
1	27775572	27776072	AT1G73860	+	1276	1	27769494	27769994	AT1G73860	+	119	Yes	Yes	6078	17	0.070444	1700	-35.5165	0	7	0.070444	700	-9.52471	1114	120	-6.37825	1000	12	-3.81201	1.95e-28	-1.07259	3.04e-17
1	6994941	6995441	AT1G20170	+	123	1	6982131	6982631	AT1G20170	+	1594	NA	Yes	12810	9	0.070444	900	-13.935	0.227317	6	0.070444	600	-7.53304	101	1761	-1.37953	300	4	NA	NA	NA	NA
2	18168462	18168962	AT2G43871	+	40	2	18161535	18162035	AT2G43871	+	1638	NA	Yes	6927	8	0.070444	800	-12.0688	1	2	0.070444	200	-1.33096	43	1687	-5.66435	600	4	NA	NA	-0.676514	1.66e-06
2	12503510	12504010	AT2G29100	+	547	2	12492075	12492575	AT2G29100	+	549	NA	Yes	11435	9	0.070444	900	-13.7498	0.260395	1	0.070444	100	-0.458009	437	464	-11.5376	800	-4	NA	NA	0.130048	0.0487208
1	26756103	26756603	AT1G70960	+	70	1	26753374	26753874	AT1G70960	+	578	NA	Yes	2729	6	0.070444	600	-7.58112	1	2	0.070444	200	-1.33091	88	585	-2.98422	400	2	NA	NA	-1.90802	3.06e-06
2	12329935	12330435	AT2G28740	+	104	2	12323024	12323524	AT2G28740	+	1912	NA	Yes	6911	10	0.070444	1000	-16.3733	0.023292	4	0.070444	400	-4.01502	65	1881	-4.03271	600	6	0.547429	0.000113092	-2.40112	2.44e-05
2	12318167	12318667	AT2G28700	+	1300	2	12303535	12304035	AT2G28700	+	95	Yes	NA	14632	9	0.070444	900	-14.0077	0.216433	6	0.070444	600	-7.56865	1264	76	-1.38564	300	4	-4.83799	3.55e-18	NA	NA
1	9924012	9924512	AT1G28320	+	162	1	9907089	9907589	AT1G28320	+	1183	NA	Yes	16923	15	0.070444	1500	-29.4194	0	4	0.070444	400	-3.99172	118	998	-9.90007	1100	-10	0.34019	0.000407627	NA	NA
1	29484552	29485052	AT1G78370	+	1512	1	29464587	29465087	AT1G78370	+	108	Yes	NA	19965	9	0.070444	900	-13.9691	0.222327	5	0.070444	500	-5.68349	1451	88	-2.06206	400	4	3.7878	2.01e-204	NA	NA
2	14959494	14959994	AT2G35615	+	109	2	14944973	14945473	AT2G35615	+	1537	NA	Yes	14521	7	0.070444	700	-9.53827	1	2	0.070444	200	-1.3309	110	1336	-4.16167	500	2	NA	NA	NA	NA
1	21716558	21717058	AT1G58440	+	1544	1	21707439	21707939	AT1G58440	+	244	Yes	NA	9119	22	0.070444	2200	-50.3183	0	6	0.070444	600	-7.48082	1222	199	-14.0115	1600	-18	NA	NA	1.08326	0.0433754
1	20169030	20169530	AT1G54030	+	77	1	20155574	20156074	AT1G54030	+	993	NA	Yes	13456	6	0.070444	600	-7.56677	1	2	0.070444	200	-1.33091	80	828	-2.98838	400	2	-1.06839	3.99e-09	-5.58652	2.26e-43
3	317540	318040	AT3G01920	+	521	3	314445	314945	AT3G01920	+	313	NA	Yes	3095	7	0.070444	700	-9.44324	1	2	0.070444	200	-1.33089	477	279	-4.12423	500	2	2.04191	6.45e-12	0.624721	2.9e-08
1	26274045	26274545	AT1G69800	+	178	1	26266525	26267025	AT1G69800	+	632	Yes	Yes	7520	9	0.070444	900	-13.8602	0.239372	1	0.070444	100	-0.456342	125	575	-11.6636	800	-4	NA	NA	-2.57454	2.56e-11
2	7522197	7522697	AT2G17300	+	149	2	7520455	7520955	AT2G17300	+	161	NA	Yes	1742	7	0.070444	700	-9.49873	1	5	0.070444	500	-5.6534	151	148	-0.957055	200	2	0.462401	0.0487102	NA	NA
2	1160945	1161445	AT2G03810	+	71	2	1148544	1149044	AT2G03810	+	1503	NA	Yes	12401	6	0.070444	600	-7.57889	1	4	0.070444	400	-4.02462	55	1130	-0.991364	200	2	-0.365926	0.0157578	7.01028	4.54e-101
2	19476577	19477077	AT2G47460	+	849	2	19469521	19470021	AT2G47460	+	63	Yes	NA	7056	6	0.070444	600	-7.59879	1	3	0.070444	300	-2.54558	987	50	-1.71812	300	2	-4.13586	4.33e-26	1.45012	5.14e-09
1	26275374	26275874	AT1G69800	+	1047	1	26269540	26270040	AT1G69800	+	119	Yes	NA	5834	14	0.070444	1400	-26.8118	1e-06	12	0.070444	1200	-21.5341	919	93	-0.858369	200	10	NA	NA	NA	NA
2	7343915	7344415	AT2G16940	+	54	2	7338538	7339038	AT2G16940	+	1682	NA	Yes	5377	15	0.070444	1500	-30.7278	0	5	0.070444	500	-5.72695	56	1801	-8.05109	1000	-12	0.703394	1.05e-05	-0.470267	1.24e-08
2	10754483	10754983	AT2G25250	+	90	2	10747562	10748062	AT2G25250	+	799	NA	Yes	6921	6	0.070444	600	-7.5462	1	3	0.070444	300	-2.53893	69	818	-1.70963	300	2	NA	NA	NA	NA
1	5518416	5518916	AT1G16110	+	1464	1	5513071	5513571	AT1G16110	+	30	Yes	NA	5345	7	0.070444	700	-9.95904	1	2	0.070444	200	-1.33106	1392	27	-4.37378	500	2	1.07539	0.000129305	NA	NA
3	881507	882007	AT3G03640	+	1368	3	863467	863967	AT3G03640	+	88	Yes	NA	18040	6	0.070444	600	-7.54896	1	3	0.070444	300	-2.53714	1117	77	-1.70737	300	2	-1.43782	1.18e-25	NA	NA
2	7181500	7182000	AT2G16570	+	1942	2	7162024	7162524	AT2G16570	+	42	Yes	NA	19476	11	0.070444	1100	-19.6194	0.001092	5	0.070444	500	-5.76405	1817	43	-3.75708	600	6	-3.88879	1.53e-39	NA	NA
1	3403939	3404439	AT1G10385	+	857	1	3396463	3396963	AT1G10385	+	1524	Yes	Yes	7476	10	0.070444	1000	-16.0526	0.029962	9	0.070444	900	-13.7326	814	1501	-0.606822	100	6	NA	NA	4.96848	1.14e-78
1	26275397	26275897	AT1G69800	+	1047	1	26272491	26272991	AT1G69800	+	85	Yes	NA	2906	17	0.070444	1700	-35.9789	0	13	0.070444	1300	-24.2498	919	91	-1.50434	400	14	NA	NA	NA	NA
1	1547431	1547931	AT1G05300	+	67	1	1529988	1530488	AT1G05300	+	2006	NA	Yes	17443	6	0.070444	600	-7.58823	1	2	0.070444	200	-1.33092	72	1797	-2.9935	400	2	NA	NA	-5.25855	9.37e-57
1	2346522	2347022	AT1G07620	+	1234	1	2343538	2344038	AT1G07620	+	814	Yes	Yes	2984	30	0.070444	3000	-76.1314	0	14	0.070444	1400	-26.2501	1174	620	-8.30101	1600	-28	-1.44318	0.00126096	NA	NA
1	2215406	2215906	AT1G07210	+	80	1	2204479	2204979	AT1G07210	+	1979	NA	Yes	10927	12	0.070444	1200	-21.6421	0.000159	10	0.070444	1000	-16.4756	82	1645	-0.875188	200	8	-0.459239	0.00281976	7.05513	6.95e-94
1	3157352	3157852	AT1G09750	+	1157	1	3146554	3147054	AT1G09750	+	43	Yes	NA	10798	6	0.070444	600	-7.68298	1	4	0.070444	400	-4.05072	712	39	-0.991628	200	2	4.68049	3.07e-215	NA	NA
3	218088	218588	AT3G01550	+	1937	3	207450	207950	AT3G01550	+	198	Yes	NA	10638	12	0.070444	1200	-21.194	0.000234	9	0.070444	900	-13.8592	1604	179	-1.23482	300	8	7.01863	1.36e-53	-4.03975	1.18e-15
1	29301628	29302128	AT1G77930	+	1683	1	29286634	29287134	AT1G77930	+	69	Yes	NA	14994	8	0.070444	800	-11.8128	1	3	0.070444	300	-2.5409	1447	62	-3.51264	500	4	2.1139	2.37e-34	NA	NA
2	15143978	15144478	AT2G36060	+	171	2	15136003	15136503	AT2G36060	+	1882	NA	Yes	7975	17	0.070444	1700	-35.179	0	8	0.070444	800	-11.6902	109	1849	-5.11029	900	12	NA	NA	3.46643	7.37e-100
1	24973953	24974453	AT1G66940	+	1797	1	24967013	24967513	AT1G66940	+	701	Yes	Yes	6940	11	0.070444	1100	-18.4811	0.00303	4	0.070444	400	-3.96896	1354	645	-4.83737	700	6	8.30084	2.68e-136	4.75331	9.21e-46
1	28244536	28245036	AT1G75250	+	577	1	28234570	28235070	AT1G75250	+	131	Yes	NA	9966	8	0.070444	800	-11.6554	1	5	0.070444	500	-5.66024	579	128	-1.44879	300	4	2.95927	8.55e-06	NA	NA
1	25884532	25885032	AT1G68850	+	764	1	25881555	25882055	AT1G68850	+	70	Yes	NA	2977	16	0.070444	1600	-33.2589	0	8	0.070444	800	-11.7494	714	85	-4.37217	800	12	-5.38412	9.03e-35	2.20761	1.18e-42
1	3717050	3717550	AT1G11120	+	51	1	3709019	3709519	AT1G11120	+	993	NA	Yes	8031	8	0.070444	800	-11.9351	1	1	0.070444	100	-0.449784	33	1111	-9.90267	700	-4	0.528515	0.0340606	-3.1086	1.87e-75
1	4669077	4669577	AT1G13620	+	102	1	4658911	4659411	AT1G13620	+	826	NA	Yes	10166	6	0.070444	600	-7.53199	1	5	0.070444	500	-5.6714	105	854	-0.573059	100	2	-5.28137	6.61e-11	NA	NA
1	20830065	20830565	AT1G55720	+	1451	1	20804068	20804568	AT1G55720	+	843	Yes	Yes	25997	6	0.070444	600	-7.4406	1	3	0.070444	300	-2.52358	1442	713	-1.69075	300	2	NA	NA	0.947874	1.96e-05
2	15062531	15063031	AT2G35880	+	132	2	15052937	15053437	AT2G35880	+	1903	NA	Yes	9594	6	0.070444	600	-7.50798	1	2	0.070444	200	-1.33091	99	1816	-2.97963	400	2	0.707082	0.00274217	6.26675	3.76e-71
2	10801116	10801616	AT2G25355	+	1016	2	10789965	10790465	AT2G25355	+	43	Yes	NA	11151	8	0.070444	800	-12.025	1	2	0.070444	200	-1.33095	901	45	-5.65144	600	4	NA	NA	NA	NA
1	25885009	25885509	AT1G68850	+	417	1	25882580	25883080	AT1G68850	+	85	Yes	NA	2429	9	0.070444	900	-14.0458	0.210708	7	0.070444	700	-9.58277	421	84	-0.913315	200	4	-5.38412	9.03e-35	NA	NA
1	21883993	21884493	AT1G59580	+	86	1	21879598	21880098	AT1G59580	+	725	NA	Yes	4395	10	0.070444	1000	-16.4529	0.021891	5	0.070444	500	-5.71353	63	657	-2.81259	500	6	-1.08475	5.04e-06	NA	NA
1	429420	429920	AT1G02220	+	1251	1	427506	428006	AT1G02220	+	107	Yes	NA	1914	25	0.070444	2500	-61.7896	0	17	0.070444	1700	-35.8872	1139	90	-3.11745	800	24	-2.83825	1.09e-35	NA	NA
1	4668038	4668538	AT1G13620	+	135	1	4661057	4661557	AT1G13620	+	446	NA	Yes	6981	7	0.070444	700	-9.50985	1	2	0.070444	200	-1.33091	83	433	-4.18231	500	2	-5.28137	6.61e-11	NA	NA
1	19767043	19767543	AT1G53040	+	86	1	19758919	19759419	AT1G53040	+	1793	NA	Yes	8124	7	0.070444	700	-9.57823	1	2	0.070444	200	-1.33093	55	1725	-4.2264	500	2	-0.780126	1.67e-12	-0.737798	5.26e-06
1	4668010	4668510	AT1G13620	+	135	1	4663120	4663620	AT1G13620	+	451	NA	Yes	4890	6	0.070444	600	-7.50617	1	1	0.070444	100	-0.455158	83	399	-5.68801	500	2	-5.28137	6.61e-11	6.97821	8.06e-193
1	11933519	11934019	AT1G32930	+	77	1	11925519	11926019	AT1G32930	+	1853	NA	Yes	8000	31	0.070444	3100	-85.7201	0	16	0.070444	1600	-33.6809	57	1785	-9.40404	1500	-32	NA	NA	NA	NA
1	20434962	20435462	AT1G54770	+	230	1	20423046	20423546	AT1G54770	+	707	NA	Yes	11916	10	0.070444	1000	-16.1708	0.027232	2	0.070444	200	-1.3309	187	761	-8.46427	800	-6	NA	NA	NA	NA
1	22689402	22689902	AT1G61500	+	1987	1	22681964	22682464	AT1G61500	+	169	Yes	Yes	7438	15	0.070444	1500	-29.3943	0	4	0.070444	400	-3.98176	1681	183	-9.74502	1100	-10	1.16092	1.61e-10	-5.67911	9.55e-37
1	5837536	5838036	AT1G17070	+	110	1	5829066	5829566	AT1G17070	+	859	NA	Yes	8470	6	0.070444	600	-7.52428	1	3	0.070444	300	-2.53585	84	781	-1.70576	300	2	NA	NA	1.3197	3.09e-12
1	10010464	10010964	AT1G28470	+	80	1	10004051	10004551	AT1G28470	+	1491	NA	Yes	6413	13	0.070444	1300	-24.3629	1.2e-05	5	0.070444	500	-5.67946	93	1276	-5.47498	800	8	-2.93861	1.2e-12	NA	NA
1	8722496	8722996	AT1G24610	+	71	1	8712851	8713351	AT1G24610	+	1023	NA	Yes	9645	8	0.070444	800	-11.8033	1	2	0.070444	200	-1.33094	49	891	-5.62903	600	4	1.34851	2.76e-36	6.83173	7.71e-14
1	18569454	18569954	AT1G50140	+	46	1	18563294	18563794	AT1G50140	+	601	NA	Yes	6160	6	0.070444	600	-7.66541	1	2	0.070444	200	-1.33098	38	556	-3.04118	400	2	NA	NA	NA	NA
1	23533983	23534483	AT1G63450	+	235	1	23527549	23528049	AT1G63450	+	1812	Yes	Yes	6434	28	0.070444	2800	-70.4167	0	18	0.070444	1800	-37.8575	271	1829	-3.73336	1000	26	-5.30359	8.88e-32	-3.08086	2.58e-63
1	19355866	19356366	AT1G52050	+	555	1	19350453	19350953	AT1G52050	+	106	Yes	NA	5413	7	0.070444	700	-9.54247	1	2	0.070444	200	-1.33091	548	75	-4.1914	500	2	-5.23971	1.09e-22	5.1451	3.48e-117
2	17368510	17369010	AT2G41660	+	194	2	17362702	17363202	AT2G41660	+	801	Yes	NA	5808	6	0.070444	600	-7.48219	1	1	0.070444	100	-0.456951	169	712	-5.64798	500	2	-5.10929	1.61e-42	NA	NA
1	30387038	30387538	AT1G80850	+	61	1	30370922	30371422	AT1G80850	+	1960	NA	Yes	16116	9	0.070444	900	-14.1913	0.187613	0	0	0	0	0	0	0	900	4	0.730099	0.00214393	-3.46808	7.84e-27
1	21251471	21251971	AT1G56680	+	48	1	21234020	21234520	AT1G56680	+	1401	NA	Yes	17451	8	0.070444	800	-11.965	1	0	0.070444	0	1.01271	40	1250	1.01271	800	4	-5.08277	7.53e-05	NA	NA
1	152992	153492	AT1G01410	+	120	1	147441	147941	AT1G01410	+	1080	NA	Yes	5551	15	0.070444	1500	-29.634	0	10	0.070444	1000	-16.3733	104	874	-2.08463	500	10	NA	NA	NA	NA
1	19759024	19759524	AT1G53025	+	1793	1	19743405	19743905	AT1G53025	+	698	Yes	Yes	15619	8	0.070444	800	-11.5191	1	6	0.070444	600	-7.44357	1725	679	-0.932176	200	4	-0.737798	5.26e-06	NA	NA
2	1152957	1153457	AT2G03780	+	92	2	1148427	1148927	AT2G03780	+	1503	NA	Yes	4530	16	0.070444	1600	-32.8367	0	7	0.070444	700	-9.61882	71	1130	-5.65614	900	12	0.928888	7.5e-14	7.01028	4.54e-101
1	9544933	9545433	AT1G27480	+	993	1	9543116	9543616	AT1G27480	+	81	Yes	NA	1817	14	0.070444	1400	-27.158	1e-06	8	0.070444	800	-11.7628	677	81	-2.91948	600	10	6.13433	6.42e-162	-0.721591	0.000220423
1	19417395	19417895	AT1G52155	+	1428	1	19407448	19407948	AT1G52155	+	44	Yes	NA	9947	6	0.070444	600	-7.67684	1	3	0.070444	300	-2.53893	1408	69	-1.70963	300	2	-1.04026	2.39e-14	-1.17928	0.00137637
2	12592502	12593002	AT2G29320	+	1553	2	12582886	12583386	AT2G29320	+	80	Yes	NA	9616	7	0.070444	700	-9.59257	1	3	0.070444	300	-2.53755	1211	75	-2.52842	400	2	0.990224	0.000675469	NA	NA
2	12703225	12703725	AT2G29730	+	522	2	12698057	12698557	AT2G29730	+	288	Yes	NA	5168	6	0.070444	600	-7.46446	1	1	0.070444	100	-0.457441	585	236	-5.6372	500	2	-0.98104	3.17e-05	NA	NA
2	12603551	12604051	AT2G29360	+	127	2	12588399	12588899	AT2G29360	+	1680	NA	Yes	15152	9	0.070444	900	-13.9273	0.228499	5	0.070444	500	-5.68801	83	1288	-2.06512	400	4	7.03195	1.44e-115	6.08807	9.14e-54
1	20811003	20811503	AT1G55690	+	62	1	20802997	20803497	AT1G55690	+	1396	NA	Yes	8006	6	0.070444	600	-7.60166	1	1	0.070444	100	-0.453883	61	1213	-5.71704	500	2	NA	NA	6.99079	3.59e-125
1	7044569	7045069	AT1G20350	+	792	1	7028939	7029439	AT1G20350	+	1996	Yes	Yes	15630	14	0.081755	1206.3	-26.2222	2e-06	2	0.070444	200	-1.33089	658	1888	-11.7546	1006.3	-10	NA	NA	NA	NA
1	2895404	2895904	AT1G09010	+	108	1	2891848	2892348	AT1G09010	+	649	NA	Yes	3556	16	0.070444	1600	-32.6444	0	2	0.070444	200	-1.33091	78	573	-20.4684	1400	-12	0.604501	8.87e-17	-1.90517	4.82e-24
1	669499	669999	AT1G02960	+	116	1	663102	663602	AT1G02960	+	852	NA	Yes	6397	20	0.070444	2000	-44.8646	0	8	0.070444	800	-11.7372	89	646	-8.08476	1200	-16	0.474031	0.0116908	NA	NA
1	20809559	20810059	AT1G55690	+	75	1	20804015	20804515	AT1G55690	+	843	NA	Yes	5544	7	0.070444	700	-9.60634	1	3	0.070444	300	-2.53821	72	713	-2.53064	400	2	NA	NA	0.947874	1.96e-05
2	12501441	12501941	AT2G29100	+	174	2	12499535	12500035	AT2G29100	+	892	NA	Yes	1906	29	0.070444	2900	-74.5368	0	6	0.070444	600	-7.5086	131	586	-25.476	2300	-28	NA	NA	5.60489	3.66e-23
1	9920571	9921071	AT1G28320	+	151	1	9912595	9913095	AT1G28320	+	1516	NA	Yes	7976	22	0.070444	2200	-50.8984	0	15	0.070444	1500	-29.7277	108	1347	-2.69385	700	20	0.34019	0.000407627	NA	NA
3	1182517	1183017	AT3G04450	+	60	3	1173581	1174081	AT3G04450	+	1718	NA	Yes	8936	11	0.070444	1100	-19.23	0.001595	6	0.070444	600	-7.63255	53	1496	-2.63737	500	6	2.02594	2.4e-22	-3.16016	3.81e-12
1	17276940	17277440	AT1G47056	+	1407	1	17271490	17271990	AT1G47056	+	307	Yes	Yes	5450	15	0.070444	1500	-29.1383	0	6	0.070444	600	-7.46243	1229	305	-5.72032	900	10	NA	NA	NA	NA
2	12317523	12318023	AT2G28700	+	180	2	12307991	12308491	AT2G28700	+	1378	Yes	Yes	9532	16	0.070444	1600	-32.217	0	6	0.070444	600	-7.48164	196	1130	-6.77478	1000	12	-4.83799	3.55e-18	-5.41758	8.45e-30
2	16503538	16504038	AT2G39550	+	309	2	16501099	16501599	AT2G39550	+	788	Yes	Yes	2439	14	0.070444	1400	-26.3807	2e-06	4	0.070444	400	-3.97375	331	731	-8.31904	1000	-10	-0.564106	1.11e-09	NA	NA
1	29610978	29611478	AT1G78740	+	148	1	29605430	29605930	AT1G78740	+	799	NA	Yes	5548	11	0.070444	1100	-18.7316	0.002453	5	0.070444	500	-5.6559	140	867	-3.53255	600	6	NA	NA	NA	NA
1	29484986	29485486	AT1G78370	+	1562	1	29467496	29467996	AT1G78370	+	99	Yes	NA	17490	9	0.070444	900	-13.9947	0.218481	1	0.070444	100	-0.453634	1520	58	-11.878	800	-4	3.7878	2.01e-204	-2.40606	2.2e-11
1	21713486	21713986	AT1G58440	+	532	1	21711999	21712499	AT1G58440	+	1588	Yes	Yes	1487	82	0.070444	8200	-289.899	0	49	0.070444	4900	-148.094	460	1309	-12.2318	3300	-114	NA	NA	NA	NA
1	20168022	20168522	AT1G54030	+	123	1	20160066	20160566	AT1G54030	+	807	NA	Yes	7956	12	0.070444	1200	-21.3754	0.000201	2	0.070444	200	-1.33091	92	656	-12.12	1000	-8	-1.06839	3.99e-09	NA	NA
1	5532078	5532578	AT1G16150	+	100	1	5518521	5519021	AT1G16150	+	1464	NA	Yes	13557	6	0.070444	600	-7.53411	1	3	0.070444	300	-2.53919	68	1392	-1.70995	300	2	-2.3512	2.91e-08	1.07539	0.000129305
2	19476524	19477024	AT2G47460	+	849	2	19472523	19473023	AT2G47460	+	50	Yes	NA	4001	9	0.070444	900	-14.3083	0.168807	7	0.070444	700	-9.7758	987	43	-0.914058	200	4	-4.13586	4.33e-26	5.09777	0
3	218372	218872	AT3G01550	+	1390	3	209421	209921	AT3G01550	+	83	Yes	NA	8951	7	0.070444	700	-9.58513	1	3	0.070444	300	-2.53893	899	69	-2.53306	400	2	7.01863	1.36e-53	NA	NA
1	10307581	10308081	AT1G29460	+	112	1	10303082	10303582	AT1G29460	+	1645	NA	Yes	4499	28	0.070444	2800	-72.3078	0	18	0.070444	1800	-39.1294	83	1368	-4.22803	1000	28	4.8984	2.08e-16	6.46144	4.7e-38
3	266463	266963	AT3G01730	+	76	3	247057	247557	AT3G01730	+	1654	NA	Yes	19406	6	0.070444	600	-7.56865	1	3	0.070444	300	-2.53602	83	1434	-1.70597	300	2	NA	NA	0.592721	0.00820679
2	11005997	11006497	AT2G25800	+	55	2	11000624	11001124	AT2G25800	+	1106	NA	Yes	5373	9	0.070444	900	-14.2489	0.178231	4	0.070444	400	-4.02138	58	1194	-3.10489	500	4	0.609686	2.49e-06	-1.73224	8.08e-12
1	11312501	11313001	AT1G31600	+	60	1	11293486	11293986	AT1G31600	+	2000	NA	Yes	19015	6	0.070444	600	-7.60769	1	2	0.070444	200	-1.33095	46	1725	-3.02322	400	2	NA	NA	NA	NA
2	15359514	15360014	AT2G36650	+	160	2	15357047	15357547	AT2G36650	+	545	NA	Yes	2467	11	0.070444	1100	-18.7073	0.002502	4	0.070444	400	-3.98633	146	408	-4.92782	700	6	-3.39676	4.27e-27	NA	NA
1	6420088	6420588	AT1G18650	+	54	1	6409982	6410482	AT1G18650	+	1200	NA	Yes	10106	6	0.070444	600	-7.62858	1	1	0.070444	100	-0.450048	34	1060	-5.80749	500	2	3.81557	6.32e-48	3.08494	2.08e-40
1	9556464	9556964	AT1G27510	+	46	1	9544492	9544992	AT1G27510	+	1910	NA	Yes	11972	14	0.070444	1400	-28.0526	0	5	0.070444	500	-5.80749	34	1804	-7.32448	900	-10	1.1406	3.13e-48	6.13433	6.42e-162
1	27559505	27560005	AT1G73300	+	56	1	27555128	27555628	AT1G73300	+	1162	NA	Yes	4377	12	0.070444	1200	-21.9856	0.000115	9	0.070444	900	-14.3821	45	1055	-1.27465	300	8	-5.56946	4.7e-38	-4.9589	4.17e-80
1	3403476	3403976	AT1G10385	+	371	1	3397099	3397599	AT1G10385	+	1825	Yes	Yes	6377	10	0.070444	1000	-16.109	0.028655	6	0.070444	600	-7.45767	354	1495	-1.89054	400	6	NA	NA	3.10472	1.2e-29
3	199479	199979	AT3G01510	+	312	3	192887	193387	AT3G01510	+	1348	Yes	Yes	6592	8	0.070444	800	-11.5575	1	2	0.070444	200	-1.33089	285	989	-5.43388	600	4	2.28605	2.63e-58	6.28291	0
1	12319889	12320389	AT1G33920	+	1029	1	12312031	12312531	AT1G33920	+	919	Yes	Yes	7858	13	0.070444	1300	-23.5511	2.4e-05	4	0.070444	400	-3.96775	957	849	-7.03127	900	-8	NA	NA	NA	NA
1	3157381	3157881	AT1G09750	+	1157	1	3152047	3152547	AT1G09750	+	56	Yes	NA	5334	13	0.070444	1300	-24.7797	8e-06	4	0.070444	400	-4.08715	712	28	-8.36486	900	-8	4.68049	3.07e-215	NA	NA
1	27574089	27574589	AT1G73340	+	1119	1	27566573	27567073	AT1G73340	+	79	Yes	NA	7516	11	0.070444	1100	-19.023	0.001928	6	0.070444	600	-7.57257	1273	74	-2.58756	500	6	-5.00698	1.2e-51	0.813318	0.00225491
1	24821939	24822439	AT1G66530	+	207	1	24810453	24810953	AT1G66530	+	1104	NA	Yes	11486	8	0.070444	800	-11.5931	1	3	0.070444	300	-2.52919	160	1133	-3.43934	500	4	NA	NA	NA	NA
1	13321348	13321848	AT1G35830	+	829	1	13310498	13310998	AT1G35830	+	32	Yes	NA	10850	6	0.070444	600	-7.77799	1	1	0.070444	100	-0.446907	699	25	-5.88519	500	2	-0.885875	0.000148832	NA	NA
1	29076433	29076933	AT1G77380	+	1779	1	29068410	29068910	AT1G77380	+	88	Yes	NA	8023	6	0.070444	600	-7.54896	1	4	0.070444	400	-4.00745	1727	76	-0.991242	200	2	-2.74029	4.28e-12	NA	NA
1	11250054	11250554	AT1G31420	+	1658	1	11244937	11245437	AT1G31420	+	122	Yes	NA	5117	8	0.070444	800	-11.6681	1	4	0.070444	400	-3.99785	1290	97	-2.2419	400	4	1.0621	1.85e-17	NA	NA
2	7179966	7180466	AT2G16570	+	446	2	7166048	7166548	AT2G16570	+	61	Yes	NA	13918	7	0.070444	700	-9.65752	1	3	0.070444	300	-2.5442	655	53	-2.55094	400	2	-3.88879	1.53e-39	NA	NA
1	24973660	24974160	AT1G66940	+	1692	1	24972494	24972994	AT1G66940	+	279	Yes	Yes	1166	57	0.070444	5700	-183.33	0	32	0.070444	3200	-84.1624	1226	296	-10.5989	2500	-72	8.30084	2.68e-136	NA	NA
1	20830070	20830570	AT1G55720	+	1451	1	20804595	20805095	AT1G55720	+	204	Yes	NA	25475	7	0.070444	700	-9.47004	1	3	0.070444	300	-2.52868	1442	172	-2.49932	400	2	NA	NA	NA	NA
1	4668056	4668556	AT1G13620	+	135	1	4665047	4665547	AT1G13620	+	1102	NA	Yes	3009	21	0.070444	2100	-47.8292	0	10	0.070444	1000	-16.4697	83	1021	-6.36046	1100	18	-5.28137	6.61e-11	NA	NA
2	13321511	13322011	AT2G31250	+	1187	2	13306970	13307470	AT2G31250	+	114	Yes	NA	14541	6	0.070444	600	-7.52083	1	5	0.070444	500	-5.68706	1010	84	-0.571093	100	2	NA	NA	NA	NA
1	18040099	18040599	AT1G48770	+	78	1	18025918	18026418	AT1G48770	+	731	NA	Yes	14181	7	0.070444	700	-9.59786	1	3	0.070444	300	-2.54223	58	604	-2.54422	400	2	NA	NA	NA	NA
1	618498	618998	AT1G02810	+	1426	1	614938	615438	AT1G02810	+	155	Yes	NA	3560	16	0.070444	1600	-32.3185	0	5	0.070444	500	-5.66599	1213	115	-8.83237	1100	-12	-4.97036	7.55e-36	4.96742	9.68e-22
1	27573522	27574022	AT1G73340	+	1319	1	27567933	27568433	AT1G73340	+	51	Yes	NA	5589	7	0.070444	700	-9.7123	1	3	0.070444	300	-2.54337	1460	55	-2.54809	400	2	-5.00698	1.2e-51	NA	NA
1	2394943	2395443	AT1G07725	+	105	1	2391330	2391830	AT1G07725	+	363	NA	Yes	3613	8	0.070444	800	-11.6981	1	2	0.070444	200	-1.33091	77	357	-5.54041	600	4	NA	NA	4.56139	1.57e-187
1	1426402	1426902	AT1G05000	+	1292	1	1421485	1421985	AT1G05000	+	64	Yes	NA	4917	11	0.070444	1100	-19.1755	0.001679	4	0.070444	400	-4.02138	1034	58	-5.12267	700	6	-1.93148	4.58e-07	NA	NA
2	10801154	10801654	AT2G25355	+	1016	2	10793043	10793543	AT2G25355	+	57	Yes	NA	8111	7	0.070444	700	-9.677	1	2	0.070444	200	-1.33093	901	55	-4.2264	500	2	NA	NA	NA	NA
2	16776127	16776627	AT2G40150	+	49	2	16766478	16766978	AT2G40150	+	709	NA	Yes	9649	7	0.070444	700	-9.72611	1	2	0.070444	200	-1.33099	35	695	-4.30526	500	2	-0.837353	6.33e-06	NA	NA
2	15838490	15838990	AT2G37790	+	234	2	15832520	15833020	AT2G37790	+	418	NA	Yes	5970	6	0.070444	600	-7.47289	1	2	0.070444	200	-1.3309	164	361	-2.96528	400	2	NA	NA	NA	NA
2	14145526	14146026	AT2G33380	+	969	2	14128574	14129074	AT2G33380	+	76	Yes	NA	16952	6	0.070444	600	-7.56865	1	3	0.070444	300	-2.54378	864	54	-1.7158	300	2	3.43544	1.69e-06	NA	NA
2	10801380	10801880	AT2G25355	+	1852	2	10795119	10795619	AT2G25355	+	61	Yes	NA	6261	8	0.070444	800	-11.8577	1	5	0.070444	500	-5.74156	1745	50	-1.47066	300	4	NA	NA	NA	NA
1	1963948	1964448	AT1G06440	+	44	1	1947494	1947994	AT1G06440	+	1297	NA	Yes	16454	8	0.070444	800	-12.0118	1	2	0.070444	200	-1.33099	35	1254	-5.73237	600	4	-0.591223	0.0141956	0.554807	6.89e-14
2	12406934	12407434	AT2G28890	+	123	2	12394488	12394988	AT2G28890	+	1156	NA	Yes	12446	7	0.070444	700	-9.52144	1	4	0.070444	400	-3.99584	103	1014	-1.55248	300	2	-0.894938	5.05e-05	NA	NA
1	20434985	20435485	AT1G54770	+	230	1	20424039	20424539	AT1G54770	+	776	NA	Yes	10946	8	0.070444	800	-11.5825	1	2	0.070444	200	-1.3309	187	636	-5.454	600	4	NA	NA	1.35822	7.49e-28
1	5838941	5839441	AT1G17070	+	73	1	5834877	5835377	AT1G17070	+	755	NA	Yes	4064	6	0.070444	600	-7.57462	1	1	0.070444	100	-0.453961	62	688	-5.71526	500	2	NA	NA	-1.25518	2.74e-06
1	10010021	10010521	AT1G28470	+	107	1	10006225	10006725	AT1G28470	+	428	NA	Yes	3796	6	0.070444	600	-7.52703	1	1	0.070444	100	-0.455815	102	462	-5.67323	500	2	-2.93861	1.2e-12	NA	NA
1	19463962	19464462	AT1G52270	+	94	1	19454871	19455371	AT1G52270	+	1311	NA	Yes	9091	7	0.070444	700	-9.56204	1	5	0.070444	500	-5.69774	74	1052	-0.957197	200	2	3.83607	3.99e-10	7.73435	4.08e-198
2	11229961	11230461	AT2G26390	+	70	2	11224881	11225381	AT2G26390	+	447	NA	Yes	5080	6	0.070444	600	-7.58112	1	1	0.070444	100	-0.455115	82	355	-5.68898	500	2	-3.61287	1.6e-06	-4.92685	3.45e-12
2	14720494	14720994	AT2G34890	+	946	2	14707993	14708493	AT2G34890	+	121	Yes	NA	12501	8	0.070444	800	-11.6696	1	6	0.070444	600	-7.54896	957	88	-0.932343	200	4	NA	NA	4.16009	1.66e-131
1	7408065	7408565	AT1G21160	+	114	1	7400033	7400533	AT1G21160	+	1667	NA	Yes	8032	15	0.070444	1500	-29.6782	0	6	0.070444	600	-7.53747	97	1468	-5.95792	900	10	NA	NA	2.36096	2.33e-07
1	5154045	5154545	AT1G14940	+	50	1	5136988	5137488	AT1G14940	+	1683	NA	Yes	17057	12	0.070444	1200	-22.1285	0.0001	4	0.070444	400	-4.02038	59	1305	-6.28612	800	8	NA	NA	NA	NA
1	23390093	23390593	AT1G63080	+	1039	1	23382983	23383483	AT1G63080	+	164	Yes	Yes	7110	8	0.070444	800	-11.6211	1	4	0.070444	400	-3.98461	865	158	-2.22571	400	4	1.0909	3.19e-05	NA	NA
1	8991917	8992417	AT1G25570	+	33	1	8982487	8982987	AT1G25570	+	845	NA	Yes	9430	7	0.070444	700	-9.90267	1	2	0.070444	200	-1.33106	27	913	-4.37378	500	2	NA	NA	1.21132	0.00182911
1	29715516	29716016	AT1G78995	+	375	1	29702934	29703434	AT1G78995	+	1091	Yes	Yes	12582	8	0.070444	800	-11.5458	1	5	0.070444	500	-5.62641	393	877	-1.44022	300	4	7.48674	1.11e-50	2.42318	2.64e-30
2	15168034	15168534	AT2G36130	+	173	2	15159914	15160414	AT2G36130	+	1184	NA	Yes	8120	13	0.070444	1300	-23.8734	1.8e-05	8	0.070444	800	-11.6479	137	1370	-2.25017	500	8	-0.209448	0.0320806	-5.06795	1.96e-23
1	23993600	23994100	AT1G64590	+	1397	1	23983015	23983515	AT1G64590	+	61	Yes	NA	10585	10	0.070444	1000	-16.647	0.018521	4	0.070444	400	-4.04424	1497	42	-4.1497	600	6	-5.93345	1.45e-60	NA	NA
2	13613385	13613885	AT2G31990	+	1376	2	13591987	13592487	AT2G31990	+	44	Yes	NA	21398	6	0.070444	600	-7.67684	1	1	0.070444	100	-0.448546	1206	29	-5.84421	500	2	-2.4324	2.4e-10	-0.271232	0.000187401
1	25886909	25887409	AT1G68862	+	20	1	25884518	25885018	AT1G68862	+	764	NA	Yes	2391	6	0.070444	600	-8.01856	1	5	0.070444	500	-5.79051	37	714	-0.558017	100	2	NA	NA	-5.38412	9.03e-35
1	12657980	12658480	AT1G34575	+	1581	1	12651917	12652417	AT1G34575	+	32	Yes	NA	6063	8	0.070444	800	-12.2304	1	1	0.070444	100	-0.447788	1498	27	-10.0295	700	-4	NA	NA	NA	NA
1	7209580	7210080	AT1G20760	+	1193	1	7198638	7199138	AT1G20760	+	28	Yes	NA	10942	6	0.070444	600	-7.83292	1	2	0.070444	200	-1.33112	1194	23	-3.1131	400	2	NA	NA	NA	NA
1	25610974	25611474	AT1G68330	+	1093	1	25600515	25601015	AT1G68330	+	80	Yes	NA	10459	8	0.070444	800	-11.7664	1	3	0.070444	300	-2.53821	1085	72	-3.49548	500	4	NA	NA	NA	NA
1	19839055	19839555	AT1G53190	+	39	1	19831039	19831539	AT1G53190	+	888	NA	Yes	8016	7	0.070444	700	-9.8181	1	1	0.070444	100	-0.450752	37	669	-7.72728	600	-2	NA	NA	-2.51827	6.19e-20
2	10348692	10349192	AT2G24330	+	748	2	10340958	10341458	AT2G24330	+	41	Yes	NA	7734	6	0.070444	600	-7.69621	1	1	0.070444	100	-0.452578	656	48	-5.74729	500	2	0.499146	5.33e-06	-3.02105	8.34e-48
1	23333972	23334472	AT1G62981	+	808	1	23311893	23312393	AT1G62981	+	132	Yes	Yes	22079	6	0.070444	600	-7.50798	1	1	0.070444	100	-0.456323	667	124	-5.66188	500	2	NA	NA	NA	NA
1	20408485	20408985	AT1G54650	+	93	1	20363976	20364476	AT1G54650	+	1312	NA	Yes	44509	6	0.070444	600	-7.5423	1	0	0.070444	0	1.00673	75	1211	1.00673	600	2	NA	NA	2.52108	2.46e-128
2	14866936	14867436	AT2G35320	+	42	2	14857032	14857532	AT2G35320	+	1211	NA	Yes	9904	6	0.070444	600	-7.68942	1	3	0.070444	300	-2.56214	30	1215	-1.74015	300	2	0.395646	0.00108333	-5.64719	7.84e-34
1	6648045	6648545	AT1G19230	+	118	1	6616454	6616954	AT1G19230	+	1869	Yes	Yes	31591	9	0.070444	900	-13.9454	0.225843	1	0.070444	100	-0.454618	72	1662	-11.7987	800	-4	-3.84501	4.03e-72	NA	NA
1	29546078	29546578	AT1G78550	+	133	1	29522018	29522518	AT1G78550	+	1863	NA	Yes	24060	6	0.070444	600	-7.50737	1	2	0.070444	200	-1.33091	84	1651	-2.98619	400	2	NA	NA	NA	NA
2	9172062	9172562	AT2G21430	+	53	2	9158632	9159132	AT2G21430	+	1311	NA	Yes	13430	6	0.070444	600	-7.63255	1	4	0.070444	400	-4.02462	55	1173	-0.991364	200	2	NA	NA	-3.25923	1.74e-05
1	17603539	17604039	AT1G47810	+	1289	1	17589999	17590499	AT1G47810	+	301	Yes	Yes	13540	8	0.070444	800	-11.56	1	4	0.070444	400	-3.97366	1241	334	-2.2126	400	4	NA	NA	NA	NA
1	18507995	18508495	AT1G49980	+	741	1	18479085	18479585	AT1G49980	+	1754	Yes	Yes	28910	6	0.070444	600	-7.44229	1	3	0.070444	300	-2.52403	556	1640	-1.69129	300	2	0.364787	0.0229976	NA	NA
2	14757002	14757502	AT2G35020	+	100	2	14750804	14751304	AT2G35020	+	473	NA	Yes	6198	7	0.070444	700	-9.55165	1	2	0.070444	200	-1.33091	82	599	-4.18335	500	2	0.50351	0.000680035	NA	NA
1	21179491	21179991	AT1G56530	+	142	1	21178418	21178918	AT1G56530	+	1011	Yes	Yes	1073	13	0.070444	1300	-23.9628	1.7e-05	5	0.070444	500	-5.65623	139	863	-5.38322	800	8	NA	NA	6.81212	1.85e-72
1	28603407	28603907	AT1G76240	+	107	1	28600404	28600904	AT1G76240	+	460	NA	Yes	3003	11	0.070444	1100	-18.8575	0.002215	3	0.070444	300	-2.53215	114	374	-7.01252	800	-6	NA	NA	NA	NA
1	5008638	5009138	AT1G14610	+	65	1	5002480	5002980	AT1G14610	+	946	NA	Yes	6158	7	0.070444	700	-9.64054	1	1	0.070444	100	-0.453358	55	689	-7.62477	600	-2	NA	NA	1.31716	0.000256703
1	20167614	20168114	AT1G54030	+	117	1	20162821	20163321	AT1G54030	+	385	NA	Yes	4793	6	0.070444	600	-7.51841	1	1	0.070444	100	-0.455999	109	308	-5.66911	500	2	-1.06839	3.99e-09	NA	NA
1	3253420	3253920	AT1G09970	+	63	1	3223988	3224488	AT1G09970	+	1406	NA	Yes	29432	6	0.070444	600	-7.59879	1	1	0.070444	100	-0.45305	52	1410	-5.7363	500	2	-1.78367	1.43e-17	0.411279	9.99e-06
1	4108507	4109007	AT1G12110	+	131	1	4095151	4095651	AT1G12110	+	1240	Yes	Yes	13356	11	0.070444	1100	-18.7739	0.00237	5	0.070444	500	-5.65946	130	1140	-3.53942	600	6	-2.1248	1.31e-15	1.98068	0.0117095
1	19281626	19282126	AT1G51900	+	269	1	19250383	19250883	AT1G51900	+	1758	Yes	Yes	31243	6	0.070444	600	-7.46703	1	4	0.070444	400	-3.97952	209	1569	-0.99113	200	2	NA	NA	-4.47906	4.11e-81
2	18774611	18775111	AT2G45550	+	576	2	18772389	18772889	AT2G45550	+	195	Yes	NA	2222	11	0.070444	1100	-18.6538	0.002616	5	0.070444	500	-5.64605	571	178	-3.51372	600	6	NA	NA	NA	NA
2	14419999	14420499	AT2G34150	+	82	2	14413558	14414058	AT2G34150	+	787	NA	Yes	6441	9	0.070444	900	-14.0591	0.208687	1	0.070444	100	-0.454248	66	851	-11.8283	800	-4	-1.20955	0.000173784	-3.22708	1.18e-19
1	6406876	6407376	AT1G18610	+	953	1	6398983	6399483	AT1G18610	+	88	Yes	NA	7893	11	0.070444	1100	-18.9577	0.00204	4	0.070444	400	-4.00865	752	74	-5.0499	700	6	0.744233	5.68e-08	NA	NA
3	218077	218577	AT3G01550	+	1937	3	210497	210997	AT3G01550	+	122	Yes	NA	7580	20	0.070444	2000	-44.7819	0	11	0.070444	1100	-18.9643	1604	87	-4.46098	900	16	7.01863	1.36e-53	NA	NA
1	23147538	23148038	AT1G62530	+	149	1	23136929	23137429	AT1G62530	+	1300	Yes	Yes	10609	6	0.070444	600	-7.49874	1	3	0.070444	300	-2.52846	178	984	-1.69664	300	2	NA	NA	3.6523	1.35e-19
1	5518170	5518670	AT1G16110	+	601	1	5517464	5517964	AT1G16110	+	82	Yes	NA	706	6	0.070444	600	-7.55806	1	2	0.070444	200	-1.33091	581	76	-2.9908	400	2	1.07539	0.000129305	1.25794	0.000266558
1	11314159	11314659	AT1G31600	+	63	1	11297341	11297841	AT1G31600	+	1347	NA	Yes	16818	6	0.070444	600	-7.59879	1	1	0.070444	100	-0.453259	54	1019	-5.73144	500	2	NA	NA	5.31861	9.65e-33
2	1861967	1862467	AT2G05170	+	49	2	1853588	1854088	AT2G05170	+	476	NA	Yes	8379	6	0.070444	600	-7.65012	1	4	0.070444	400	-4.05072	39	450	-0.991628	200	2	NA	NA	NA	NA
1	19019499	19019999	AT1G51310	+	136	1	19004619	19005119	AT1G51310	+	1645	NA	Yes	14880	6	0.070444	600	-7.50559	1	3	0.070444	300	-2.53095	129	1701	-1.69969	300	2	1.6492	4.22e-22	-6.07622	3.03e-09
1	3404011	3404511	AT1G10385	+	857	1	3400646	3401146	AT1G10385	+	558	Yes	Yes	3365	20	0.070444	2000	-43.5982	0	12	0.070444	1200	-21.0193	814	501	-3.33605	800	16	NA	NA	-1.99384	2.96e-18
1	23937526	23938026	AT1G64440	+	1109	1	23935027	23935527	AT1G64440	+	198	Yes	Yes	2499	28	0.070444	2800	-70.7245	0	9	0.070444	900	-13.8836	1125	156	-14.9622	1900	-26	-0.853436	7.62e-09	2.90061	3.93e-267
1	27573516	27574016	AT1G73340	+	1319	1	27569557	27570057	AT1G73340	+	26	Yes	NA	3959	8	0.070444	800	-12.4268	0.967953	3	0.070444	300	-2.55614	1460	35	-3.6143	500	4	-5.00698	1.2e-51	-5.51732	5.74e-24
1	29076423	29076923	AT1G77380	+	1779	1	29070000	29070500	AT1G77380	+	87	Yes	NA	6423	17	0.070444	1700	-35.9408	0	12	0.070444	1200	-21.5271	1727	94	-1.9628	500	14	-2.74029	4.28e-12	-0.43056	0.000121165
1	11250357	11250857	AT1G31420	+	438	1	11248494	11248994	AT1G31420	+	149	Yes	NA	1863	6	0.070444	600	-7.49874	1	1	0.070444	100	-0.456636	399	143	-5.65493	500	2	1.0621	1.85e-17	1.81882	4.36e-60
1	486964	487464	AT1G02400	+	1749	1	476029	476529	AT1G02400	+	76	Yes	NA	10935	8	0.070444	800	-11.7816	1	5	0.070444	500	-5.67586	1418	98	-1.45284	300	4	NA	NA	NA	NA
2	9762465	9762965	AT2G22940	+	252	2	9760431	9760931	AT2G22940	+	1232	Yes	NA	2034	40	0.070444	4000	-114.414	0	28	0.070444	2800	-70.3696	242	1156	-3.86709	1200	44	NA	NA	-3.61951	6.4e-09
2	8010866	8011366	AT2G18480	+	1180	2	8004456	8004956	AT2G18480	+	70	Yes	NA	6410	10	0.070444	1000	-16.5602	0.020014	4	0.070444	400	-4.00804	972	75	-4.00593	600	6	NA	NA	NA	NA
1	24836001	24836501	AT1G66570	+	85	1	24824492	24824992	AT1G66570	+	1736	NA	Yes	11509	9	0.070444	900	-14.0458	0.210708	2	0.070444	200	-1.33092	66	1647	-7.06721	700	-4	NA	NA	NA	NA
2	13321206	13321706	AT2G31250	+	234	2	13319051	13319551	AT2G31250	+	170	Yes	NA	2155	7	0.070444	700	-9.48555	1	1	0.070444	100	-0.456757	174	152	-7.49732	600	-2	NA	NA	-0.386984	0.020495
1	25683488	25683988	AT1G68480	+	76	1	25669084	25669584	AT1G68480	+	1279	NA	Yes	14404	6	0.070444	600	-7.56865	1	3	0.070444	300	-2.53945	67	1021	-1.71028	300	2	NA	NA	NA	NA
1	30048009	30048509	AT1G79880	+	103	1	30043613	30044113	AT1G79880	+	1213	NA	Yes	4396	11	0.070444	1100	-18.8754	0.002184	6	0.070444	600	-7.58578	68	1214	-2.5983	500	6	0.394982	0.00233651	-4.80709	6.19e-11
2	9590397	9590897	AT2G22570	+	89	2	9577111	9577611	AT2G22570	+	1022	NA	Yes	13286	9	0.070444	900	-14.0295	0.213145	2	0.070444	200	-1.33093	60	1067	-7.09409	700	-4	-1.68696	1.02e-16	NA	NA
1	22961054	22961554	AT1G62120	+	102	1	22949600	22950100	AT1G62120	+	1604	NA	Yes	11454	10	0.070444	1000	-16.3807	0.023165	2	0.070444	200	-1.33092	72	1437	-8.66541	800	-6	NA	NA	NA	NA
2	10801391	10801891	AT2G25355	+	1852	2	10798971	10799471	AT2G25355	+	111	Yes	NA	2420	24	0.070444	2400	-58.2232	0	11	0.070444	1100	-18.971	1745	86	-7.84823	1300	-22	NA	NA	NA	NA
1	1166526	1167026	AT1G04350	+	107	1	1161487	1161987	AT1G04350	+	884	NA	Yes	5039	11	0.070444	1100	-18.8575	0.002215	5	0.070444	500	-5.67725	96	751	-3.57426	600	6	3.73658	4.28e-70	-2.63126	1.56e-06
2	8662106	8662606	AT2G20070	+	1503	2	8648445	8648945	AT2G20070	+	67	Yes	NA	13661	10	0.070444	1000	-16.5863	0.019559	4	0.070444	400	-4.01941	1394	60	-4.04976	600	6	NA	NA	-6.05532	7.04e-25
1	6839319	6839819	AT1G19790	+	1432	1	6830040	6830540	AT1G19790	+	49	Yes	NA	9279	7	0.070444	700	-9.72611	1	0	0.070444	0	1.00904	1139	56	1.00904	700	2	-1.57659	1.48e-06	NA	NA
2	15838899	15839399	AT2G37790	+	67	2	15834884	15835384	AT2G37790	+	1479	NA	Yes	4015	9	0.070444	900	-14.1446	0.195119	2	0.070444	200	-1.33091	86	1290	-7.00596	700	-4	NA	NA	6.06557	2.21e-11
2	14146337	14146837	AT2G33380	+	1299	2	14133993	14134493	AT2G33380	+	99	Yes	NA	12344	9	0.070444	900	-13.9947	0.218481	3	0.070444	300	-2.53602	1222	83	-4.56926	600	4	3.43544	1.69e-06	NA	NA
2	14861878	14862378	AT2G35290	+	65	2	14857059	14857559	AT2G35290	+	1211	NA	Yes	4819	11	0.070444	1100	-19.1629	0.001698	6	0.070444	600	-7.61756	57	1215	-2.62467	500	6	1.9506	4.62e-05	-5.64719	7.84e-34
1	20434518	20435018	AT1G54770	+	205	1	20431048	20431548	AT1G54770	+	1046	NA	Yes	3470	16	0.070444	1600	-32.1409	0	5	0.070444	500	-5.63957	217	832	-8.61831	1100	-12	NA	NA	1.23497	9.59e-07
1	19463920	19464420	AT1G52270	+	94	1	19457324	19457824	AT1G52270	+	758	NA	Yes	6596	9	0.070444	900	-14.0111	0.215892	3	0.070444	300	-2.53776	74	803	-4.58715	600	4	3.83607	3.99e-10	NA	NA
2	13061031	13061531	AT2G30660	+	1542	2	13033607	13034107	AT2G30660	+	56	Yes	NA	27424	8	0.070444	800	-11.8927	1	1	0.070444	100	-0.453454	1418	56	-9.68233	700	-4	NA	NA	0.933023	2.16e-08
2	9235523	9236023	AT2G21580	+	30	2	9228317	9228817	AT2G21580	+	442	NA	Yes	7206	6	0.070444	600	-7.80345	1	4	0.070444	400	-4.08262	29	272	-0.992081	200	2	NA	NA	-3.19862	7.61e-60
2	12760568	12761068	AT2G29940	+	1431	2	12718533	12719033	AT2G29940	+	134	Yes	NA	42035	6	0.070444	600	-7.50677	1	3	0.070444	300	-2.53147	1716	122	-1.70033	300	2	5.6035	1.67e-69	NA	NA
1	23390460	23390960	AT1G63080	+	1639	1	23384054	23384554	AT1G63080	+	483	Yes	Yes	6406	13	0.070444	1300	-23.6173	2.3e-05	3	0.070444	300	-2.52453	1354	448	-9.63138	1000	-8	1.0909	3.19e-05	NA	NA
2	14720539	14721039	AT2G34890	+	946	2	14710524	14711024	AT2G34890	+	58	Yes	NA	10015	6	0.070444	600	-7.61415	1	2	0.070444	200	-1.33093	957	60	-3.00386	400	2	NA	NA	NA	NA
1	12604880	12605380	AT1G34470	+	1622	1	12599012	12599512	AT1G34470	+	80	Yes	Yes	5868	12	0.070444	1200	-21.6421	0.000159	3	0.070444	300	-2.53798	1410	73	-8.56819	900	-8	0.308855	0.0056356	NA	NA
1	4163535	4164035	AT1G12260	+	123	1	4159946	4160446	AT1G12260	+	1719	Yes	Yes	3589	31	0.070444	3100	-82.958	0	9	0.070444	900	-13.9916	100	1405	-19.9488	2200	-32	-1.26319	3.14e-09	3.99687	5.32e-63
1	19265178	19265678	AT1G51870	+	112	1	19250530	19251030	AT1G51870	+	1758	NA	Yes	14648	6	0.070444	600	-7.52252	1	1	0.070444	100	-0.455603	95	1569	-5.67797	500	2	-4.99841	6.17e-13	-4.47906	4.11e-81
1	18198491	18198991	AT1G49200	+	1900	1	18182007	18182507	AT1G49200	+	1337	Yes	Yes	16484	12	0.131375	643.444	-20.9492	0.00029	1	0.089729	78.5072	-0.458378	1748	980	-9.40947	564.937	-8	NA	NA	-1.45131	1.6e-15
1	29715504	29716004	AT1G78995	+	375	1	29711023	29711523	AT1G78995	+	1496	Yes	Yes	4481	24	0.070444	2400	-56.4357	0	17	0.070444	1700	-34.7595	393	1328	-2.40239	700	22	7.48674	1.11e-50	NA	NA
1	23993497	23993997	AT1G64590	+	1397	1	23985014	23985514	AT1G64590	+	59	Yes	NA	8483	6	0.070444	600	-7.61086	1	2	0.070444	200	-1.33098	1497	38	-3.04118	400	2	-5.93345	1.45e-60	NA	NA
2	13613153	13613653	AT2G31990	+	1379	2	13606536	13607036	AT2G31990	+	67	Yes	NA	6617	6	0.070444	600	-7.58823	1	3	0.070444	300	-2.53844	982	71	-1.70901	300	2	-2.4324	2.4e-10	NA	NA
2	12603506	12604006	AT2G29360	+	127	2	12592049	12592549	AT2G29360	+	1430	NA	Yes	11457	10	0.070444	1000	-16.3054	0.024527	4	0.070444	400	-4.0037	83	1127	-3.98948	600	6	7.03195	1.44e-115	0.990224	0.000675469
1	3870017	3870517	AT1G11490	+	1438	1	3855060	3855560	AT1G11490	+	104	Yes	NA	14957	10	0.070444	1000	-16.3733	0.023292	1	0.070444	100	-0.455241	1216	85	-14.0458	900	-6	-2.32697	3.07e-05	-2.66037	7.27e-29
1	25611350	25611850	AT1G68330	+	917	1	25604533	25605033	AT1G68330	+	108	Yes	NA	6817	10	0.070444	1000	-16.3593	0.023544	3	0.070444	300	-2.53462	812	92	-5.75497	700	6	NA	NA	NA	NA
2	1687168	1687668	AT2G04800	+	938	2	1662557	1663057	AT2G04800	+	55	Yes	NA	24611	6	0.070444	600	-7.62477	1	5	0.070444	500	-5.72915	841	55	-0.565792	100	2	-4.88181	1.08e-39	NA	NA
2	18221493	18221993	AT2G44040	+	129	2	18219320	18219820	AT2G44040	+	1278	NA	Yes	2173	22	0.070444	2200	-51.1663	0	12	0.070444	1200	-21.4233	112	1026	-4.8667	1000	20	1.94576	5e-30	NA	NA
2	15848486	15848986	AT2G37820	+	39	2	15838009	15838509	AT2G37820	+	1792	NA	Yes	10477	6	0.070444	600	-7.71089	1	2	0.070444	200	-1.33096	41	1663	-3.03356	400	2	-5.4977	1.91e-30	NA	NA
2	18957458	18957958	AT2G46130	+	1116	2	18951400	18951900	AT2G46130	+	85	Yes	NA	6058	11	0.070444	1100	-18.9778	0.002005	2	0.070444	200	-1.33094	958	49	-10.622	900	-6	NA	NA	1.26699	5.28e-20
2	19087535	19088035	AT2G46500	+	160	2	19081084	19081584	AT2G46500	+	765	NA	Yes	6451	9	0.070444	900	-13.8789	0.236269	1	0.070444	100	-0.456483	133	680	-11.6528	800	-4	NA	NA	NA	NA
2	11257981	11258481	AT2G26460	+	1449	2	11240022	11240522	AT2G26460	+	77	Yes	NA	17959	8	0.070444	800	-11.7777	1	0	0.070444	0	1.00622	1298	81	1.00622	800	4	NA	NA	-4.92489	2.63e-25
2	19087584	19088084	AT2G46500	+	160	2	19082975	19083475	AT2G46500	+	606	NA	Yes	4609	10	0.070444	1000	-16.2429	0.025727	3	0.070444	300	-2.53068	133	562	-5.69649	700	6	NA	NA	NA	NA
2	19087497	19087997	AT2G46500	+	160	2	19084104	19084604	AT2G46500	+	926	NA	Yes	3393	14	0.070444	1400	-26.6292	1e-06	5	0.070444	500	-5.65833	133	957	-6.44202	900	10	NA	NA	-5.16808	3.79e-21
1	23404591	23405091	AT1G63110	+	124	1	23384481	23384981	AT1G63110	+	1266	NA	Yes	20110	6	0.070444	600	-7.51322	1	3	0.070444	300	-2.53844	71	1332	-1.70901	300	2	NA	NA	NA	NA
2	12131418	12131918	AT2G28370	+	58	2	12103576	12104076	AT2G28370	+	1300	NA	Yes	27842	6	0.070444	600	-7.61415	1	2	0.070444	200	-1.33095	48	1238	-3.01972	400	2	NA	NA	NA	NA
1	19396556	19397056	AT1G52120	+	63	1	19385055	19385555	AT1G52120	+	1725	NA	Yes	11501	6	0.070444	600	-7.59879	1	2	0.070444	200	-1.33092	71	1450	-2.99422	400	2	-5.16949	7.13e-09	4.28722	1.46e-17
1	17418556	17419056	AT1G47480	+	861	1	17394522	17395022	AT1G47480	+	448	Yes	Yes	24034	6	0.070444	600	-7.45148	1	2	0.070444	200	-1.33089	902	503	-2.95088	400	2	-3.94309	3.3e-44	NA	NA
2	13928550	13929050	AT2G32830	+	1721	2	13924560	13925060	AT2G32830	+	176	Yes	NA	3990	24	0.070444	2400	-57.2586	0	7	0.070444	700	-9.50245	1623	144	-14.4443	1700	-22	NA	NA	0.545959	4.61e-13
1	17604428	17604928	AT1G47810	+	321	1	17594457	17594957	AT1G47810	+	1092	Yes	Yes	9971	10	0.070444	1000	-16.1246	0.028276	1	0.070444	100	-0.457979	418	1044	-13.766	900	-6	NA	NA	NA	NA
2	18086041	18086541	AT2G43600	+	140	2	18081817	18082317	AT2G43600	+	790	NA	Yes	4224	10	0.070444	1000	-16.2772	0.025052	1	0.070444	100	-0.456483	133	667	-13.9167	900	-6	-4.08022	2.74e-14	-2.25113	1.41e-11
2	18714402	18714902	AT2G45412	+	98	2	18704152	18704652	AT2G45412	+	997	Yes	Yes	10250	9	0.070444	900	-13.9979	0.217969	6	0.070444	600	-7.52895	105	871	-1.37884	300	4	NA	NA	-0.55381	0.0209628
1	4865325	4865825	AT1G14240	+	832	1	4856967	4857467	AT1G14240	+	129	Yes	NA	8358	6	0.070444	600	-7.50987	1	4	0.070444	400	-3.99616	1073	102	-0.991184	200	2	-4.23284	2.31e-22	-1.41632	3.51e-06
1	6488909	6489409	AT1G18830	+	101	1	6476542	6477042	AT1G18830	+	1291	NA	Yes	12367	7	0.070444	700	-9.55005	1	2	0.070444	200	-1.33092	69	1219	-4.19967	500	2	NA	NA	NA	NA
2	17137586	17138086	AT2G41100	+	644	2	17136488	17136988	AT2G41100	+	93	Yes	NA	1098	20	0.070444	2000	-45.2893	0	4	0.070444	400	-4.00096	791	89	-18.1119	1600	-16	2.73445	7.91e-14	5.8916	1.24e-77
1	17603481	17603981	AT1G47810	+	1289	1	17598958	17599458	AT1G47810	+	1290	Yes	Yes	4523	30	0.085994	2457.5	-75.9434	0	14	0.082879	1189.93	-26.186	1241	1275	-7.44058	1267.56	-28	NA	NA	NA	NA
1	26920546	26921046	AT1G71430	+	255	1	26916544	26917044	AT1G71430	+	1318	NA	Yes	4002	11	0.070444	1100	-18.5969	0.002746	10	0.070444	1000	-16.168	234	1071	-0.607317	100	6	NA	NA	-0.340964	0.0466744
1	5532021	5532521	AT1G16150	+	100	1	5525546	5526046	AT1G16150	+	424	NA	Yes	6475	10	0.070444	1000	-16.3884	0.023032	6	0.070444	600	-7.58578	68	487	-1.94468	400	6	-2.3512	2.91e-08	NA	NA
1	19281608	19282108	AT1G51900	+	269	1	19255959	19256459	AT1G51900	+	1700	Yes	Yes	25649	6	0.070444	600	-7.46703	1	1	0.070444	100	-0.457281	209	1688	-5.6407	500	2	NA	NA	-2.49075	7.1e-09
1	1558940	1559440	AT1G05340	+	82	1	1554420	1554920	AT1G05340	+	1329	NA	Yes	4520	13	0.070444	1300	-24.34	1.2e-05	9	0.070444	900	-14.1377	68	1418	-1.69981	400	8	-0.963964	0.0317108	NA	NA
1	9441996	9442496	AT1G27180	+	113	1	9425474	9425974	AT1G27180	+	1240	Yes	Yes	16522	7	0.070444	700	-9.53302	1	1	0.070444	100	-0.455843	103	1179	-7.53096	600	-2	-1.35096	1.11e-22	-0.74403	0.00128359
1	4854539	4855039	AT1G14200	+	222	1	4847485	4847985	AT1G14200	+	1470	NA	Yes	7054	29	0.070444	2900	-74.0114	0	12	0.070444	1200	-21.1578	226	1423	-10.3905	1700	-28	NA	NA	0.701289	3.24e-05
3	218085	218585	AT3G01550	+	1937	3	216022	216522	AT3G01550	+	186	Yes	NA	2063	48	0.070444	4800	-148.061	0	26	0.070444	2600	-64.5608	1604	138	-11.0064	2200	-58	7.01863	1.36e-53	NA	NA
1	18183045	18183545	AT1G49170	+	222	1	18182040	18182540	AT1G49170	+	1337	NA	Yes	1005	21	0.070444	2100	-47.2219	0	16	0.070444	1600	-32.2783	164	980	-1.73283	500	18	NA	NA	-1.45131	1.6e-15
2	17117427	17117927	AT2G41020	+	187	2	17106145	17106645	AT2G41020	+	1127	NA	Yes	11282	9	0.070444	900	-13.8522	0.240754	2	0.070444	200	-1.3309	155	1120	-6.91903	700	-4	0.311792	0.00809268	NA	NA
1	23147032	23147532	AT1G62530	+	429	1	23144476	23144976	AT1G62530	+	87	Yes	NA	2556	12	0.070444	1200	-21.5797	0.000168	4	0.070444	400	-4.00745	313	76	-6.18353	800	8	NA	NA	0.756145	1.08e-05
1	19019472	19019972	AT1G51310	+	136	1	19008407	19008907	AT1G51310	+	1149	NA	Yes	11065	6	0.070444	600	-7.50559	1	5	0.070444	500	-5.65985	129	1331	-0.574508	100	2	1.6492	4.22e-22	-3.19419	4.15e-56
2	17820372	17820872	AT2G42830	+	1450	2	17805943	17806443	AT2G42830	+	98	Yes	NA	14429	6	0.070444	600	-7.53633	1	2	0.070444	200	-1.33091	1128	80	-2.98838	400	2	NA	NA	-0.637539	4.1e-05
1	4854828	4855328	AT1G14200	+	72	1	4850078	4850578	AT1G14200	+	880	NA	Yes	4750	10	0.070444	1000	-16.544	0.020295	3	0.070444	300	-2.53674	79	807	-5.787	700	6	NA	NA	-3.08516	1.45e-36
1	21359340	21359840	AT1G57670	+	778	1	21353876	21354376	AT1G57670	+	72	Yes	NA	5464	7	0.070444	700	-9.61557	1	4	0.070444	400	-4.01847	622	61	-1.56342	300	2	NA	NA	NA	NA
1	7818029	7818529	AT1G22150	+	590	1	7808543	7809043	AT1G22150	+	666	Yes	Yes	9486	7	0.070444	700	-9.4199	1	3	0.070444	300	-2.52395	580	678	-2.48417	400	2	NA	NA	NA	NA
2	17120468	17120968	AT2G41020	+	167	2	17109361	17109861	AT2G41020	+	864	NA	Yes	11107	8	0.070444	800	-11.6187	1	1	0.070444	100	-0.456265	121	993	-9.5236	700	-4	0.311792	0.00809268	NA	NA
1	8234138	8234638	AT1G23205	+	1906	1	8212924	8213424	AT1G23205	+	94	Yes	NA	21214	7	0.070444	700	-9.56204	1	5	0.070444	500	-5.67081	1750	106	-0.957099	200	2	NA	NA	-0.950458	1.25e-07
2	13408157	13408657	AT2G31470	+	1190	2	13396450	13396950	AT2G31470	+	114	Yes	NA	11707	6	0.070444	600	-7.52083	1	3	0.070444	300	-2.53132	1087	124	-1.70014	300	2	NA	NA	NA	NA
1	29076374	29076874	AT1G77380	+	1779	1	29072024	29072524	AT1G77380	+	77	Yes	NA	4350	19	0.070444	1900	-42.4829	0	12	0.070444	1200	-21.8899	1727	61	-3.14551	700	16	-2.74029	4.28e-12	NA	NA
1	7003881	7004381	AT1G20200	+	1120	1	6994870	6995370	AT1G20200	+	123	Yes	NA	9011	6	0.070444	600	-7.51393	1	4	0.070444	400	-3.99648	1096	101	-0.991185	200	2	-0.252284	0.00221683	NA	NA
1	24835548	24836048	AT1G66570	+	80	1	24829041	24829541	AT1G66570	+	663	NA	Yes	6507	7	0.070444	700	-9.59257	1	3	0.070444	300	-2.54	65	628	-2.53666	400	2	NA	NA	NA	NA
1	18911620	18912120	AT1G51010	+	258	1	18902982	18903482	AT1G51010	+	1050	Yes	Yes	8638	7	0.070444	700	-9.4539	1	2	0.070444	200	-1.33089	416	875	-4.11638	500	2	NA	NA	NA	NA
1	9178415	9178915	AT1G26560	+	680	1	9171039	9171539	AT1G26560	+	57	Yes	NA	7376	8	0.070444	800	-11.8852	1	2	0.070444	200	-1.33097	474	39	-5.69453	600	4	3.70255	1.95e-26	NA	NA
2	14145519	14146019	AT2G33380	+	969	2	14141528	14142028	AT2G33380	+	78	Yes	NA	3991	12	0.070444	1200	-21.6621	0.000156	3	0.070444	300	-2.53674	864	79	-8.53306	900	-8	3.43544	1.69e-06	NA	NA
1	22791592	22792092	AT1G61720	+	1033	1	22785989	22786489	AT1G61720	+	119	Yes	NA	5603	9	0.070444	900	-13.9432	0.226134	3	0.070444	300	-2.53325	964	103	-4.5412	600	4	NA	NA	NA	NA
2	19083007	19083507	AT2G46494	+	606	2	19080495	19080995	AT2G46494	+	218	Yes	Yes	2512	11	0.070444	1100	-18.6282	0.002673	6	0.070444	600	-7.46762	562	265	-2.50642	500	6	NA	NA	NA	NA
1	9178415	9178915	AT1G26560	+	680	1	9177458	9177958	AT1G26560	+	71	Yes	NA	957	24	0.070444	2400	-59.8295	0	19	0.070444	1900	-42.9399	474	65	-1.77547	500	22	3.70255	1.95e-26	NA	NA
1	27993452	27993952	AT1G74480	+	202	1	27988543	27989043	AT1G74480	+	1702	NA	Yes	4909	17	0.070444	1700	-35.0633	0	5	0.070444	500	-5.64526	182	1364	-9.90935	1200	-12	NA	NA	-5.09284	2.77e-44
2	11518466	11518966	AT2G26980	+	133	2	11512952	11513452	AT2G26980	+	1684	NA	Yes	5514	18	0.070444	1800	-38.421	0	6	0.070444	600	-7.53633	98	1296	-9.29818	1200	-14	1.21271	0.0001077	5.07985	1.59e-227
2	13999563	14000063	AT2G32980	+	88	2	13987853	13988353	AT2G32980	+	1513	NA	Yes	11710	11	0.070444	1100	-18.9577	0.00204	3	0.070444	300	-2.53506	89	1293	-7.0728	800	-6	NA	NA	-1.01007	5.78e-11
1	23388044	23388544	AT1G63080	+	301	1	23386574	23387074	AT1G63080	+	662	Yes	Yes	1470	27	0.070444	2700	-66.6382	0	13	0.070444	1300	-23.7621	239	625	-7.31574	1400	-26	1.0909	3.19e-05	NA	NA
2	14720541	14721041	AT2G34890	+	946	2	14716505	14717005	AT2G34890	+	110	Yes	NA	4036	22	0.070444	2200	-51.4912	0	4	0.070444	400	-4.00522	957	80	-22.0269	1800	-20	NA	NA	NA	NA
1	26061465	26061965	AT1G69320	+	74	1	26058047	26058547	AT1G69320	+	1670	NA	Yes	3418	16	0.070444	1600	-33.1617	0	8	0.070444	800	-11.8927	56	1273	-4.56845	800	12	6.2326	8.96e-11	-0.467089	0.0405557
1	19265012	19265512	AT1G51870	+	112	1	19256531	19257031	AT1G51870	+	1313	NA	Yes	8481	10	0.070444	1000	-16.3464	0.023772	2	0.070444	200	-1.33091	95	1297	-8.58444	800	-6	-4.99841	6.17e-13	-2.49075	7.1e-09
3	844112	844612	AT3G03530	+	564	3	832534	833034	AT3G03530	+	70	Yes	NA	11578	6	0.070444	600	-7.58112	1	1	0.070444	100	-0.454883	481	77	-5.69424	500	2	-2.80443	4.83e-23	-5.74972	1.8e-35
2	5935060	5935560	AT2G14100	+	417	2	5909535	5910035	AT2G14100	+	1641	Yes	Yes	25525	12	0.070444	1200	-21.042	0.000268	2	0.070444	200	-1.33089	490	1546	-11.774	1000	-8	-5.36289	2.22e-31	0.548551	0.000711713
1	1622578	1623078	AT1G05490	+	862	1	1609507	1610007	AT1G05490	+	73	Yes	NA	13071	6	0.070444	600	-7.57462	1	1	0.070444	100	-0.448546	823	29	-5.84421	500	2	0.702647	0.049612	NA	NA
2	11724555	11725055	AT2G27410	+	58	2	11709880	11710380	AT2G27410	+	1544	NA	Yes	14675	7	0.070444	700	-9.67187	1	3	0.070444	300	-2.53585	84	1245	-2.52277	400	2	NA	NA	-4.99033	1.61e-21
1	18198514	18199014	AT1G49200	+	1900	1	18183033	18183533	AT1G49200	+	222	Yes	NA	15481	12	0.070444	1200	-21.1624	0.000241	1	0.070444	100	-0.456898	1748	164	-18.7	1100	-8	NA	NA	NA	NA
2	15166606	15167106	AT2G36130	+	351	2	15165505	15166005	AT2G36130	+	345	NA	Yes	1101	6	0.070444	600	-7.45844	1	4	0.070444	400	-3.97649	259	316	-0.991124	200	2	-0.209448	0.0320806	-2.52361	1.68e-20
1	29715533	29716033	AT1G78995	+	375	1	29714515	29715015	AT1G78995	+	1354	Yes	Yes	1018	54	0.070444	5400	-169.173	0	48	0.070444	4800	-144.528	393	1220	-1.42327	600	66	7.48674	1.11e-50	-3.57055	1.45e-12
2	12592035	12592535	AT2G29320	+	1430	2	12586503	12587003	AT2G29320	+	48	Yes	Yes	5532	6	0.070444	600	-7.65499	1	3	0.070444	300	-2.5442	1127	53	-1.71634	300	2	0.990224	0.000675469	8.77262	3.26e-117
1	7209054	7209554	AT1G20760	+	543	1	7202965	7203465	AT1G20760	+	73	Yes	NA	6089	8	0.070444	800	-11.7942	1	2	0.070444	200	-1.33095	497	48	-5.63426	600	4	NA	NA	NA	NA
2	13613115	13613615	AT2G31990	+	1379	2	13609083	13609583	AT2G31990	+	69	Yes	NA	4032	9	0.070444	900	-14.1309	0.19731	4	0.070444	400	-4.0235	982	56	-3.11004	500	4	-2.4324	2.4e-10	1.38539	0.000201852
2	7888538	7889038	AT2G18140	+	1669	2	7856996	7857496	AT2G18140	+	1164	Yes	Yes	31542	7	0.10047	490.799	-9.40698	1	3	0.080705	261.855	-2.5231	1518	1015	-1.69017	228.944	2	NA	NA	NA	NA
1	29017416	29017916	AT1G77230	+	119	1	29012565	29013065	AT1G77230	+	1997	NA	Yes	4851	16	0.070444	1600	-32.5438	0	10	0.070444	1000	-16.3697	105	1867	-2.61575	600	12	-0.715105	0.00288426	NA	NA
1	12657975	12658475	AT1G34575	+	1581	1	12655997	12656497	AT1G34575	+	113	Yes	NA	1978	25	0.070444	2500	-61.6259	0	16	0.070444	1600	-32.7694	1498	97	-3.71913	900	24	NA	NA	1.33871	6.87e-07
2	13613100	13613600	AT2G31990	+	1379	2	13610047	13610547	AT2G31990	+	139	Yes	NA	3053	25	0.070444	2500	-61.0921	0	8	0.070444	800	-11.7089	982	100	-13.9201	1700	-24	-2.4324	2.4e-10	NA	NA
2	13613954	13614454	AT2G31985	+	1325	2	13613057	13613557	AT2G31985	+	1379	NA	Yes	897	102	0.094495	7603.87	-377.885	0	54	0.070444	5400	-166.733	1108	982	-6.17981	2203.87	148	NA	NA	-2.4324	2.4e-10
1	21920532	21921032	AT1G59650	+	209	1	21901931	21902431	AT1G59650	+	1772	NA	Yes	18601	8	0.070444	800	-11.5921	1	3	0.070444	300	-2.52868	172	1297	-3.43624	500	4	-0.441255	0.00178483	3.17175	1.47e-30
2	18965416	18965916	AT2G46170	+	114	2	18957439	18957939	AT2G46170	+	1116	NA	Yes	7977	9	0.070444	900	-13.9544	0.224517	2	0.070444	200	-1.3309	111	958	-6.96154	700	-4	-0.456048	0.0267445	NA	NA
1	10018480	10018980	AT1G28500	+	53	1	10013938	10014438	AT1G28500	+	1684	NA	Yes	4542	7	0.070444	700	-9.69959	1	4	0.070444	400	-4.02955	51	1623	-1.56893	300	2	NA	NA	-2.88496	0.00138109
1	23559511	23560011	AT1G63520	+	656	1	23556043	23556543	AT1G63520	+	422	Yes	Yes	3468	10	0.070444	1000	-16.0969	0.028938	4	0.070444	400	-3.97172	535	417	-3.87315	600	6	-1.64167	3.96e-05	-0.406534	0.00192645
2	11257992	11258492	AT2G26460	+	1449	2	11245574	11246074	AT2G26460	+	94	Yes	NA	12418	8	0.070444	800	-11.7235	1	3	0.070444	300	-2.53619	1298	82	-3.48272	500	4	NA	NA	NA	NA
1	23404613	23405113	AT1G63110	+	124	1	23386598	23387098	AT1G63110	+	662	NA	Yes	18015	7	0.070444	700	-9.52038	1	3	0.070444	300	-2.53844	71	625	-2.53142	400	2	NA	NA	NA	NA
1	17417450	17417950	AT1G47480	+	1041	1	17395985	17396485	AT1G47480	+	1032	Yes	Yes	21465	7	0.070444	700	-9.40868	1	4	0.070444	400	-3.96742	946	930	-1.5393	300	2	-3.94309	3.3e-44	-0.530693	9.05e-05
3	1068475	1068975	AT3G04080	+	43	3	1051185	1051685	AT3G04080	+	692	NA	Yes	17290	6	0.070444	600	-7.68298	1	3	0.070444	300	-2.54829	45	548	-1.72164	300	2	-0.840832	1.41e-12	NA	NA
1	12612044	12612544	AT1G34500	+	62	1	12604904	12605404	AT1G34500	+	1622	NA	Yes	7140	14	0.070444	1400	-27.5057	1e-06	7	0.070444	700	-9.70582	52	1410	-4.00391	700	10	NA	NA	0.308855	0.0056356
1	17604072	17604572	AT1G47810	+	1341	1	17600998	17601498	AT1G47810	+	868	Yes	Yes	3074	37	0.070444	3700	-101.041	0	17	0.070444	1700	-34.6081	1325	759	-10.3677	2000	-38	NA	NA	NA	NA
2	17150090	17150590	AT2G41140	+	1680	2	17143026	17143526	AT2G41140	+	175	Yes	NA	7064	14	0.070444	1400	-26.5844	1e-06	5	0.070444	500	-5.65461	1546	144	-6.42297	900	10	0.677938	9.27e-06	-1.31334	4.52e-11
1	8498946	8499446	AT1G24010	+	907	1	8480993	8481493	AT1G24010	+	1289	Yes	Yes	17953	6	0.070444	600	-7.43973	1	1	0.070444	100	-0.458303	783	1184	-5.61838	500	2	NA	NA	NA	NA
2	14729146	14729646	AT2G34920	+	69	2	14720570	14721070	AT2G34920	+	946	NA	Yes	8576	7	0.070444	700	-9.62562	1	3	0.070444	300	-2.5442	53	957	-2.55094	400	2	NA	NA	NA	NA
1	1799463	1799963	AT1G05930	+	102	1	1790067	1790567	AT1G05930	+	1364	NA	Yes	9396	7	0.070444	700	-9.54847	1	2	0.070444	200	-1.33091	91	1044	-4.17487	500	2	NA	NA	NA	NA
2	1175341	1175841	AT2G03850	+	385	2	1165447	1165947	AT2G03850	+	85	Yes	NA	9894	6	0.070444	600	-7.55334	1	1	0.070444	100	-0.4552	341	84	-5.68706	500	2	NA	NA	NA	NA
1	4865353	4865853	AT1G14240	+	832	1	4859056	4859556	AT1G14240	+	167	Yes	NA	6297	8	0.070444	800	-11.6187	1	1	0.070444	100	-0.456139	1073	115	-9.53054	700	-4	-4.23284	2.31e-22	-4.94101	9.28e-16
1	19335140	19335640	AT1G52000	+	477	1	19325522	19326022	AT1G52000	+	92	Yes	NA	9618	6	0.070444	600	-7.54357	1	0	0.070444	0	1.00993	367	51	1.00993	600	2	7.69951	1.24e-111	-0.690169	9.85e-20
2	10029488	10029988	AT2G23560	+	128	2	10022013	10022513	AT2G23560	+	1809	NA	Yes	7475	14	0.070444	1400	-26.7613	1e-06	11	0.070444	1100	-18.8256	115	1708	-1.18558	300	10	-1.7394	1.05e-12	-0.906404	0.00023645
1	2293063	2293563	AT1G07470	+	54	1	2281960	2282460	AT1G07470	+	1428	NA	Yes	11103	7	0.070444	700	-9.69361	1	3	0.070444	300	-2.54713	47	1418	-2.56105	400	2	-0.264901	0.0179816	2.36952	0.0025688
1	9439922	9440422	AT1G27180	+	774	1	9428008	9428508	AT1G27180	+	806	Yes	NA	11914	10	0.070444	1000	-16.0572	0.029855	2	0.070444	200	-1.33089	768	672	-8.37807	800	-6	-1.35096	1.11e-22	-6.41903	2.02e-34
1	4864978	4865478	AT1G14240	+	859	1	4860577	4861077	AT1G14240	+	160	Yes	NA	4401	9	0.070444	900	-13.8789	0.236269	6	0.070444	600	-7.48247	1055	193	-1.37114	300	4	-4.23284	2.31e-22	NA	NA
1	994295	994795	AT1G03905	+	656	1	991452	991952	AT1G03905	+	247	Yes	NA	2843	10	0.070444	1000	-16.1596	0.027485	3	0.070444	300	-2.52638	873	261	-5.6343	700	6	-1.88771	1.98e-24	-1.02585	1.88e-07
1	16975996	16976496	AT1G44910	+	62	1	16963463	16963963	AT1G44910	+	1407	NA	Yes	12533	8	0.070444	800	-11.8515	1	1	0.070444	100	-0.450752	37	1307	-9.84298	700	-4	NA	NA	4.40266	6.96e-38
2	9708500	9709000	AT2G22802	+	23	2	9705571	9706071	AT2G22802	+	1190	NA	Yes	2929	7	0.070444	700	-10.1563	1	3	0.070444	300	-2.56686	27	1027	-2.63228	400	2	NA	NA	-0.596671	0.0109811
1	21359099	21359599	AT1G57670	+	329	1	21356145	21356645	AT1G57670	+	38	Yes	NA	2954	6	0.070444	600	-7.71885	1	2	0.070444	200	-1.331	395	33	-3.05723	400	2	NA	NA	NA	NA
1	20681996	20682496	AT1G55390	+	1979	1	20652470	20652970	AT1G55390	+	43	Yes	NA	29526	6	0.070444	600	-7.68298	1	1	0.070444	100	-0.452169	1861	45	-5.75687	500	2	-2.989	1.96e-13	0.961766	4.17e-09
2	13408027	13408527	AT2G31470	+	1190	2	13400024	13400524	AT2G31470	+	89	Yes	NA	8003	7	0.070444	700	-9.57181	1	3	0.070444	300	-2.53674	1087	79	-2.52574	400	2	NA	NA	0.336966	0.00841359
1	29076413	29076913	AT1G77380	+	1779	1	29073561	29074061	AT1G77380	+	183	Yes	NA	2852	51	0.070444	5100	-160.833	0	36	0.070444	3600	-101.742	1727	131	-5.28341	1500	62	-2.74029	4.28e-12	-1.14688	5.76e-06
1	22718611	22719111	AT1G61570	+	256	1	22678488	22678988	AT1G61570	+	1236	NA	Yes	40123	6	0.070444	600	-7.46902	1	2	0.070444	200	-1.33089	257	1062	-2.95751	400	2	-0.718667	1.95e-08	2.55431	1.17e-09
1	488565	489065	AT1G02400	+	119	1	480469	480969	AT1G02400	+	1362	Yes	Yes	8096	8	0.070444	800	-11.6727	1	3	0.070444	300	-2.53409	96	1231	-3.46952	500	4	NA	NA	NA	NA
1	486957	487457	AT1G02400	+	1749	1	483556	484056	AT1G02400	+	129	Yes	Yes	3401	15	0.070444	1500	-29.5757	0	9	0.070444	900	-14.0546	1418	83	-2.77348	600	10	NA	NA	NA	NA
1	10202460	10202960	AT1G29195	+	645	1	10183635	10184135	AT1G29195	+	1843	Yes	Yes	18825	10	0.070444	1000	-16.0667	0.029638	6	0.070444	600	-7.44724	548	1602	-1.88636	400	6	-2.0248	2.69e-12	-2.26083	1.05e-20
2	8662056	8662556	AT2G20070	+	1503	2	8651519	8652019	AT2G20070	+	41	Yes	NA	10537	6	0.070444	600	-7.69621	1	2	0.070444	200	-1.33114	1394	22	-3.12188	400	2	NA	NA	0.923022	5.1e-13
1	26453072	26453572	AT1G70250	+	1129	1	26430419	26430919	AT1G70250	+	117	Yes	NA	22653	6	0.070444	600	-7.51841	1	1	0.070444	100	-0.455158	1037	83	-5.68801	500	2	0.758169	0.00649796	-0.621255	0.00084851
2	15594556	15595056	AT2G37120	+	89	2	15591552	15592052	AT2G37120	+	1576	NA	Yes	3004	15	0.070444	1500	-29.9313	0	6	0.070444	600	-7.62858	54	1140	-6.27707	900	10	-0.483134	1.37e-07	NA	NA
1	19556059	19556559	AT1G52490	+	981	1	19539995	19540495	AT1G52490	+	548	Yes	Yes	16064	6	0.070444	600	-7.44724	1	2	0.070444	200	-1.33089	923	423	-2.95219	400	2	NA	NA	NA	NA
2	16906966	16907466	AT2G40475	+	251	2	16887637	16888137	AT2G40475	+	905	NA	Yes	19329	6	0.070444	600	-7.46984	1	3	0.070444	300	-2.52667	245	907	-1.69447	300	2	1.35422	1.54e-25	6.7282	4.51e-20
1	27993538	27994038	AT1G74480	+	202	1	27991854	27992354	AT1G74480	+	952	NA	Yes	1684	19	0.070444	1900	-41.0752	0	11	0.070444	1100	-18.6712	182	728	-3.57956	800	16	NA	NA	5.26401	1.15e-252
2	17476052	17476552	AT2G41880	+	132	2	17469106	17469606	AT2G41880	+	1875	NA	Yes	6946	14	0.070444	1400	-26.7411	1e-06	4	0.070444	400	-3.99463	107	1733	-8.57733	1000	-10	NA	NA	NA	NA
1	10544963	10545463	AT1G30060	+	226	1	10542632	10543132	AT1G30060	+	993	NA	Yes	2331	26	0.070444	2600	-63.6106	0	17	0.070444	1700	-35.1835	170	818	-3.42143	900	24	NA	NA	NA	NA
1	12268553	12269053	AT1G33811	+	803	1	12258562	12259062	AT1G33811	+	113	Yes	Yes	9991	7	0.070444	700	-9.53302	1	1	0.070444	100	-0.456203	680	118	-7.51763	600	-2	8.12702	6.44e-42	NA	NA
1	22465008	22465508	AT1G60990	+	76	1	22437937	22438437	AT1G60990	+	1885	NA	Yes	27071	6	0.070444	600	-7.56865	1	1	0.070444	100	-0.45418	65	1747	-5.71025	500	2	1.8811	1.35e-48	0.837399	0.000201197
1	2304528	2305028	AT1G07500	+	117	1	2282013	2282513	AT1G07500	+	1428	NA	Yes	22515	7	0.070444	700	-9.52815	1	0	0.070444	0	1.00509	99	1418	1.00509	700	2	NA	NA	2.36952	0.0025688
2	14450973	14451473	AT2G34220	+	1055	2	14440905	14441405	AT2G34220	+	88	Yes	NA	10068	6	0.070444	600	-7.54896	1	3	0.070444	300	-2.53602	944	83	-1.70597	300	2	-1.5195	0.000722897	0.862517	0.000127348
2	14450617	14451117	AT2G34220	+	1523	2	14442503	14443003	AT2G34220	+	77	Yes	NA	8114	9	0.070444	900	-14.0837	0.20489	7	0.070444	700	-9.56977	1195	90	-0.913283	200	4	-1.5195	0.000722897	NA	NA
1	18217427	18217927	AT1G49240	+	161	1	18202419	18202919	AT1G49240	+	1082	NA	Yes	15008	6	0.070444	600	-7.49341	1	2	0.070444	200	-1.3309	132	1101	-2.97054	400	2	-1.63266	3.31e-06	NA	NA
1	28339500	28340000	AT1G75500	+	1286	1	28321970	28322470	AT1G75500	+	59	Yes	NA	17530	6	0.070444	600	-7.61086	1	0	0.070444	0	1.00888	1156	57	1.00888	600	2	-0.44292	0.0342541	-1.5732	5.51e-08
1	18198986	18199486	AT1G49200	+	1175	1	18184935	18185435	AT1G49200	+	134	Yes	Yes	14051	6	0.070444	600	-7.50677	1	1	0.070444	100	-0.456161	994	116	-5.6655	500	2	NA	NA	0.76339	1.7e-05
2	14450564	14451064	AT2G34220	+	1523	2	14445000	14445500	AT2G34220	+	211	Yes	NA	5564	26	0.070444	2600	-63.7138	0	14	0.070444	1400	-26.5492	1195	189	-5.64325	1200	24	-1.5195	0.000722897	NA	NA
2	7913430	7913930	AT2G18180	+	1517	2	7876940	7877440	AT2G18180	+	123	Yes	NA	36490	7	0.070444	700	-9.52144	1	1	0.070444	100	-0.455503	1573	92	-7.54357	600	-2	NA	NA	NA	NA
1	20782669	20783169	AT1G55610	+	990	1	20773639	20774139	AT1G55610	+	108	Yes	NA	9030	6	0.070444	600	-7.52609	1	1	0.070444	100	-0.4552	943	84	-5.68706	500	2	-2.47866	1.92e-13	NA	NA
2	8032026	8032526	AT2G18510	+	108	2	8020516	8021016	AT2G18510	+	1010	NA	Yes	11510	6	0.070444	600	-7.52609	1	3	0.070444	300	-2.53602	83	1037	-1.70597	300	2	NA	NA	NA	NA
1	23791962	23792462	AT1G64100	+	1801	1	23770510	23771010	AT1G64100	+	904	Yes	Yes	21452	7	0.084199	585.64	-9.4108	1	1	0.078558	89.6703	-0.458351	1672	897	-7.43985	495.97	-2	NA	NA	-2.72482	2.95e-33
2	11725021	11725521	AT2G27410	+	113	2	11716660	11717160	AT2G27410	+	1330	NA	Yes	8361	10	0.070444	1000	-16.3433	0.023831	2	0.070444	200	-1.33091	94	1212	-8.5871	800	-6	NA	NA	7.89779	1.39e-115
1	21370430	21370930	AT1G57700	+	81	1	21359462	21359962	AT1G57700	+	778	NA	Yes	10968	7	0.070444	700	-9.59003	1	1	0.070444	100	-0.454379	68	622	-7.58578	600	-2	-0.444505	0.0235058	NA	NA
1	29092540	29093040	AT1G77410	+	66	1	29076430	29076930	AT1G77410	+	1779	NA	Yes	16110	7	0.070444	700	-9.63664	1	4	0.070444	400	-4.06117	35	1727	-1.58522	300	2	NA	NA	-2.74029	4.28e-12
2	1696893	1697393	AT2G04840	+	538	2	1687061	1687561	AT2G04840	+	938	Yes	Yes	9832	7	0.070444	700	-9.42244	1	6	0.070444	600	-7.44606	584	841	-0.588517	100	2	NA	NA	-4.88181	1.08e-39
1	3869966	3870466	AT1G11490	+	1438	1	3859934	3860434	AT1G11490	+	144	Yes	NA	10032	8	0.070444	800	-11.64	1	5	0.070444	500	-5.65946	1216	130	-1.44859	300	4	-2.32697	3.07e-05	NA	NA
2	759934	760434	AT2G02710	+	98	2	756526	757026	AT2G02710	+	619	NA	Yes	3408	13	0.070444	1300	-24.1918	1.4e-05	7	0.070444	700	-9.57823	86	543	-3.08286	600	8	0.609615	1.78e-09	NA	NA
1	23792018	23792518	AT1G64100	+	1801	1	23777962	23778462	AT1G64100	+	76	Yes	NA	14056	9	0.070444	900	-14.089	0.204066	4	0.070444	400	-4.00804	1672	75	-3.07297	500	4	NA	NA	NA	NA
1	25707650	25708150	AT1G68510	+	1598	1	25694949	25695449	AT1G68510	+	76	Yes	NA	12701	8	0.070444	800	-11.7816	1	3	0.070444	300	-2.53945	1440	67	-3.50338	500	4	NA	NA	NA	NA
2	18965078	18965578	AT2G46170	+	78	2	18959692	18960192	AT2G46170	+	1048	NA	Yes	5386	6	0.070444	600	-7.56493	1	2	0.070444	200	-1.33092	67	878	-2.99735	400	2	-0.456048	0.0267445	-3.67556	7.51e-22
2	17109201	17109701	AT2G40995	+	656	2	17103567	17104067	AT2G40995	+	151	Yes	NA	5634	10	0.070444	1000	-16.2572	0.025444	3	0.070444	300	-2.53224	663	113	-5.71948	700	6	NA	NA	NA	NA
2	17497354	17497854	AT2G41910	+	409	2	17469151	17469651	AT2G41910	+	1875	Yes	Yes	28203	8	0.070444	800	-11.541	1	3	0.070444	300	-2.52473	416	1733	-3.41239	500	4	NA	NA	NA	NA
1	9824991	9825491	AT1G28130	+	582	1	9795996	9796496	AT1G28130	+	2021	Yes	Yes	28995	7	0.070444	700	-9.42026	1	0	0	0	0	0	0	0	700	2	-2.14911	1.45e-14	0.430167	0.00270282
2	6805931	6806431	AT2G15610	+	23	2	6801873	6802373	AT2G15610	+	867	NA	Yes	4058	8	0.070444	800	-12.5702	0.838978	7	0.070444	700	-9.87097	35	864	-0.567117	100	4	NA	NA	NA	NA
1	28686385	28686885	AT1G76460	+	73	1	28681569	28682069	AT1G76460	+	2009	NA	Yes	4816	7	0.070444	700	-9.61241	1	0	0	0	0	0	0	0	700	2	NA	NA	-5.09158	2.03e-24
2	11254447	11254947	AT2G26460	+	99	2	11248011	11248511	AT2G26460	+	1146	Yes	Yes	6436	9	0.070444	900	-13.9947	0.218481	2	0.070444	200	-1.33091	78	1004	-7.0265	700	-4	NA	NA	3.63399	2.28e-38
2	18284027	18284527	AT2G44220	+	1271	2	18275002	18275502	AT2G44220	+	75	Yes	NA	9025	8	0.070444	800	-11.7857	1	2	0.070444	200	-1.33093	1042	56	-5.59802	600	4	NA	NA	NA	NA
1	5242528	5243028	AT1G15230	+	50	1	5238521	5239021	AT1G15230	+	793	NA	Yes	4007	8	0.070444	800	-11.9446	1	3	0.070444	300	-2.5477	46	780	-3.55709	500	4	-0.536447	0.000793925	0.850384	0.00035097
1	23404527	23405027	AT1G63110	+	124	1	23390168	23390668	AT1G63110	+	1039	NA	Yes	14359	9	0.070444	900	-13.9331	0.227615	3	0.070444	300	-2.53844	71	865	-4.59419	600	4	NA	NA	1.0909	3.19e-05
1	23334376	23334876	AT1G62981	+	383	1	23330022	23330522	AT1G62981	+	167	Yes	Yes	4354	10	0.070444	1000	-16.2329	0.025925	2	0.070444	200	-1.3309	350	206	-8.4531	800	-6	NA	NA	NA	NA
[truncated: 5,678 more rows]
