# Supplementary material for: Polycomb-dependent differential chromatin compartmentalization determines gene coregulation in Arabidopsis
Source: HighWire-hosted journal article supplement (doi:10.1101/gr.273771.120), 2021-06-03
Supplement: Supplemental_Table_S13.xlsx [file Supplemental_Table_S13.xlsx]

## Sheet: S13
Supplementary Table 13: Common genes between HiChIP and C-Hi-C data for Root and Shoot
Shoot_ChiC_HiChIP_Common		Root_ChiC_HiChIP_Common
Gene1	Gene2	Gene1	Gene2
AT1G18150	AT1G18140	AT1G64680	AT1G64660
AT1G73580	AT1G73570	AT1G78460	AT1G78420
AT1G54000	AT1G53990	AT1G33600	AT1G33560
AT1G02530	AT1G02520	AT1G62030	AT1G62020
AT1G34190	AT1G34180	AT2G17060	AT2G17050
AT1G29030	AT1G29020	AT3G10720	AT3G10690
AT1G29030	AT1G29025	AT1G68600	AT1G68580
AT1G66020	AT1G65985	AT1G59740	AT1G59725
AT1G54340	AT1G54330	AT2G19190	AT2G19170
AT1G16310	AT1G16300	AT1G51590	AT1G51570
AT1G05650	AT1G05640	AT2G32550	AT2G32530
AT2G31190	AT2G31180	AT1G68790	AT1G68780
AT1G73280	AT1G73270	AT1G66140	AT1G66130
AT1G47600	AT1G47580	AT1G13040	AT1G13000
AT2G24270	AT2G24260	AT1G22403	AT1G22400
AT1G80120	AT1G80110	AT2G29670	AT2G29650
AT2G24860	AT2G24850	AT1G56540	AT1G56500
AT2G39410	AT2G39400	AT1G29430	AT1G29390
AT1G75260	AT1G75250	AT1G66910	AT1G66890
AT1G14180	AT1G14170	AT1G52060	AT1G52040
AT1G18140	AT1G18100	AT1G21130	AT1G21090
AT2G29740	AT2G29730	AT1G56540	AT1G56510
AT2G21400	AT2G21390	AT1G16160	AT1G16110
AT2G41700	AT2G41690	AT1G18660	AT1G18620
AT2G41150	AT2G41140	AT1G75260	AT1G75240
AT1G78380	AT1G78360	AT1G71960	AT1G71940
AT1G14250	AT1G14230	AT1G66950	AT1G66940
AT2G29960	AT2G29940	AT1G67900	AT1G67890
AT1G59660	AT1G59650	AT2G14080	AT2G14050
AT2G28970	AT2G28960	AT3G18980	AT3G18930
AT2G38860	AT2G38840	AT3G07360	AT3G07350
AT1G62305	AT1G62260	AT2G26470	AT2G26440
AT1G02520	AT1G02500	AT1G03590	AT1G03560
AT1G22230	AT1G22220	AT3G14940	AT3G14930
AT2G32500	AT2G32487	AT1G59660	AT1G59650
AT1G17960	AT1G17950	AT1G53710	AT1G53700
AT1G49320	AT1G49310	AT2G16280	AT2G16230
AT3G02250	AT3G02230	AT1G63710	AT1G63690
AT1G54330	AT1G54320	AT1G69550	AT1G69530
AT1G11600	AT1G11580	AT2G01950	AT2G01940
AT1G66280	AT1G66270	AT1G55430	AT1G55390
AT2G16720	AT2G16710	AT1G25280	AT1G25275
AT3G01516	AT3G01513	AT1G02670	AT1G02660
AT1G05640	AT1G05630	AT2G37940	AT2G37930
AT2G28520	AT2G28510	AT1G51580	AT1G51570
AT1G29200	AT1G29195	AT2G32540	AT2G32530
AT1G68810	AT1G68795	AT2G16870	AT2G16850
AT1G12040	AT1G12030	AT2G44490	AT2G44480
AT2G27010	AT2G27000	AT2G16870	AT2G16860
AT1G17590	AT1G17580	AT1G73860	AT1G73830
AT1G73860	AT1G73850	AT3G11370	AT3G11330
AT1G54030	AT1G54000	AT1G80810	AT1G80770
AT2G16940	AT2G16920	AT1G07180	AT1G07175
AT2G34150	AT2G34140	AT2G47460	AT2G47440
AT1G64440	AT1G64430	AT2G16940	AT2G16920
AT1G12260	AT1G12250	AT1G63450	AT1G63440
AT1G69320	AT1G69310	AT1G16150	AT1G16110
AT1G14240	AT1G14220	AT1G75250	AT1G75240
AT1G14240	AT1G14230	AT1G61500	AT1G61490
AT1G23100	AT1G23090	AT1G11490	AT1G11450
AT1G55390	AT1G55350	AT1G51310	AT1G51270
AT2G28810	AT2G28800	AT2G29320	AT2G29290
AT1G30650	AT1G30640	AT1G63520	AT1G63500
AT2G36720	AT2G36710	AT2G36720	AT2G36710
AT3G03530	AT3G03520	AT2G28960	AT2G28950
AT1G11490	AT1G11480	AT2G14100	AT2G14080
AT2G04800	AT2G04780	AT1G70510	AT1G70500
AT2G01900	AT2G01880	AT1G14460	AT1G14430
AT2G38110	AT2G38100	AT1G63700	AT1G63690
AT1G58037	AT1G58030	AT1G49980	AT1G49970
AT3G01180	AT3G01175	AT1G02660	AT1G02640
AT1G61760	AT1G61750	AT1G02660	AT1G02650
AT2G46760	AT2G46740	AT3G06650	AT3G06640
AT2G01900	AT2G01890	AT3G10740	AT3G10710
AT1G27180	AT1G27170	AT2G25170	AT2G25140
AT1G01670	AT1G01660	AT1G55420	AT1G55390
AT2G46760	AT2G46750	AT1G22400	AT1G22370
AT1G55390	AT1G55380	AT2G21870	AT2G21850
AT2G40475	AT2G40470	AT1G79060	AT1G79030
AT1G75540	AT1G75520	AT1G22590	AT1G22570
AT1G30720	AT1G30700	AT1G65900	AT1G65870
AT1G68620	AT1G68600	AT2G43520	AT2G43490
AT1G62380	AT1G62370	AT3G14810	AT3G14770
AT1G77520	AT1G77500	AT2G29650	AT2G29630
AT1G51570	AT1G51560	AT3G11320	AT3G11290
AT3G02240	AT3G02230	AT2G18990	AT2G18960
AT1G12030	AT1G12000	AT1G75240	AT1G75210
AT1G22440	AT1G22430	AT3G18670	AT3G18660
AT2G29060	AT2G29050	AT1G08340	AT1G08290
AT1G24420	AT1G24400	AT1G47620	AT1G47603
AT1G69830	AT1G69810	AT1G56520	AT1G56500
AT3G01910	AT3G01900	AT1G29410	AT1G29390
AT2G18990	AT2G18980	AT1G61120	AT1G61080
AT1G07200	AT1G07180	AT2G29130	AT2G29120
AT1G17060	AT1G17050	AT1G56520	AT1G56510
AT1G32550	AT1G32510	AT1G65790	AT1G65730
AT2G36895	AT2G36890	AT2G14610	AT2G14580
AT1G52110	AT1G52100	AT1G71420	AT1G71400
AT2G27370	AT2G27360	AT2G41720	AT2G41700
AT2G22560	AT2G22540	AT1G71420	AT1G71410
AT1G28090	AT1G28080	AT2G40360	AT2G40320
AT2G32970	AT2G32960	AT3G09320	AT3G09300
AT1G51860	AT1G51850	AT3G66658	AT3G06640
AT1G14230	AT1G14220	AT1G74470	AT1G74460
AT1G64060	AT1G64050	AT2G15790	AT2G15760
AT2G29940	AT2G29910	AT1G03600	AT1G03560
AT2G46750	AT2G46720	AT1G71050	AT1G71040
AT1G74690	AT1G74660	AT1G63880	AT1G63860
AT2G46750	AT2G46740	AT3G06640	AT3G06620
AT1G61380	AT1G61360	AT3G06640	AT3G06630
AT2G19160	AT2G19130	AT2G32850	AT2G32795
AT1G67030	AT1G67020	AT2G45460	AT2G45420
AT1G33610	AT1G33600	AT1G24340	AT1G24320
AT1G55970	AT1G55960	AT3G11130	AT3G11110
AT1G61380	AT1G61370	AT2G30020	AT2G30010
AT1G76520	AT1G76510	AT1G05030	AT1G05020
AT1G54460	AT1G54450	AT1G13040	AT1G12990
AT3G02230	AT3G02220	AT1G79600	AT1G79580
AT1G67840	AT1G67810	AT1G79050	AT1G79030
AT1G62810	AT1G62800	AT1G33240	AT1G33230
AT1G65860	AT1G65850	AT3G11385	AT3G11370
AT1G51190	AT1G51170	AT2G36780	AT2G36740
AT1G14185	AT1G14170	AT3G10360	AT3G10340
AT1G64940	AT1G64920	AT2G01190	AT2G01180
AT1G45145	AT1G45130	AT2G01220	AT2G01190
AT1G14185	AT1G14180	AT1G51850	AT1G51805
AT1G12200	AT1G12160	AT1G14700	AT1G14685
AT1G64940	AT1G64930	AT1G53170	AT1G53160
AT1G53645	AT1G53640	AT1G56510	AT1G56500
AT1G17600	AT1G17580	AT2G42850	AT2G42800
AT1G22650	AT1G22630	AT1G79860	AT1G79840
AT1G66480	AT1G66470	AT2G29340	AT2G29320
AT1G17600	AT1G17590	AT1G22403	AT1G22370
AT1G17050	AT1G17040	AT3G02150	AT3G02130
AT2G26370	AT2G26360	AT1G32170	AT1G32150
AT1G80830	AT1G80820	AT1G73170	AT1G73130
AT1G21140	AT1G21120	AT1G33750	AT1G33720
AT1G10480	AT1G10450	AT1G73170	AT1G73150
AT2G35270	AT2G35260	AT1G02640	AT1G02630
AT3G04580	AT3G04570	AT3G06630	AT3G06620
AT1G21140	AT1G21130	AT1G64710	AT1G64700
AT1G51850	AT1G51830	AT3G01380	AT3G01370
AT1G27680	AT1G27660	AT3G10720	AT3G10700
AT1G26690	AT1G26680	AT2G27060	AT2G27050
AT1G10480	AT1G10460	AT1G14620	AT1G14590
AT2G32960	AT2G32950	AT3G10720	AT3G10710
AT1G51850	AT1G51840	AT1G25425	AT1G25400
AT1G62290	AT1G62262	AT1G24330	AT1G24320
AT1G29025	AT1G29000	AT1G77280	AT1G77250
AT1G55740	AT1G55730	AT1G30330	AT1G30320
AT1G10510	AT1G10480	AT2G46440	AT2G46420
AT1G13970	AT1G13960	AT1G58602	AT1G58520
AT3G03660	AT3G03650	AT2G29630	AT2G29620
AT1G65190	AT1G65180	AT2G43500	AT2G43490
AT1G62290	AT1G62280	AT2G30230	AT2G30210
AT1G29025	AT1G29020	AT3G02020	AT3G01930
AT1G76440	AT1G76430	AT1G64780	AT1G64710
AT2G23540	AT2G23530	AT1G72470	AT1G72450
AT2G39855	AT2G39850	AT1G51840	AT1G51800
AT1G19800	AT1G19790	AT1G51840	AT1G51805
AT1G67760	AT1G67730	AT3G18524	AT3G18510
AT1G75520	AT1G75500	AT1G18620	AT1G18600
AT1G61370	AT1G61360	AT1G18620	AT1G18610
AT1G75520	AT1G75510	AT1G32120	AT1G32080
AT1G67760	AT1G67750	AT1G21130	AT1G21120
AT2G45970	AT2G45950	AT2G42840	AT2G42800
AT1G29290	AT1G29280	AT1G06410	AT1G06390
AT1G26390	AT1G26380	AT1G15310	AT1G15290
AT1G76510	AT1G76500	AT2G36990	AT2G36970
AT1G70860	AT1G70850	AT1G75100	AT1G75030
AT2G32510	AT2G32500	AT1G59725	AT1G59700
AT1G58300	AT1G58290	AT1G26160	AT1G26150
AT1G65850	AT1G65840	AT2G40520	AT2G40490
AT1G55590	AT1G55580	AT3G05630	AT3G05625
AT2G02690	AT2G02680	AT3G06770	AT3G06750
AT1G66470	AT1G66430	AT1G80110	AT1G80080
AT2G18380	AT2G18360	AT1G63860	AT1G63850
AT2G16990	AT2G16980	AT3G06770	AT3G06760
AT1G67830	AT1G67810	AT1G72200	AT1G72180
AT1G66470	AT1G66440	AT1G05010	AT1G05000
AT1G03850	AT1G03840	AT2G42540	AT2G42520
AT1G79630	AT1G79620	AT1G35350	AT1G35340
AT1G64930	AT1G64920	AT2G43680	AT2G43670
AT1G53635	AT1G53633	AT3G02060	AT3G02020
AT2G32880	AT2G32860	AT1G09300	AT1G09270
AT1G78120	AT1G78100	AT3G02060	AT3G02050
AT2G43690	AT2G43680	AT2G31060	AT2G31020
AT1G58410	AT1G58400	AT1G07430	AT1G07420
AT2G32880	AT2G32870	AT2G03505	AT2G03480
AT1G67460	AT1G67440	AT3G09840	AT3G09790
AT1G80820	AT1G80810	AT1G24460	AT1G24420
AT2G40120	AT2G40110	AT1G67890	AT1G67870
AT1G16120	AT1G16110	AT3G06760	AT3G06750
AT1G51840	AT1G51830	AT2G29690	AT2G29670
AT1G13960	AT1G13940	AT1G13650	AT1G13635
AT1G15310	AT1G15290	AT1G52080	AT1G52070
AT2G25590	AT2G25580	AT2G21390	AT2G21380
AT1G79330	AT1G79310	AT1G71420	AT1G71380
AT2G23530	AT2G23520	AT2G29940	AT2G29890
AT2G28780	AT2G28710	AT1G07720	AT1G07705
AT1G29280	AT1G29250	AT1G35340	AT1G35330
AT1G63000	AT1G62990	AT2G28990	AT2G28950
AT2G37460	AT2G37450	AT2G03140	AT2G03120
AT1G72125	AT1G72120	AT2G28990	AT2G28960
AT1G25460	AT1G25425	AT3G02050	AT3G02020
AT2G01540	AT2G01530	AT1G32100	AT1G32060
AT1G10760	AT1G10750	AT3G01900	AT3G01820
AT1G55430	AT1G55420	AT2G01970	AT2G01950
AT1G03840	AT1G03820	AT1G70170	AT1G70140
AT1G25460	AT1G25450	AT1G67510	AT1G67500
AT2G18370	AT2G18360	AT1G42550	AT1G42540
AT1G53670	AT1G53660	AT1G47580	AT1G47570
AT1G48510	AT1G48500	AT1G56550	AT1G56500
AT1G67820	AT1G67810	AT1G66960	AT1G66920
AT1G35350	AT1G35340	AT2G29090	AT2G29080
AT2G32280	AT2G32270	AT1G11100	AT1G11070
AT1G62570	AT1G62560	AT2G34690	AT2G34680
AT2G38110	AT2G38080	AT1G56550	AT1G56510
AT3G04560	AT3G04520	AT2G29680	AT2G29670
AT1G78850	AT1G78820	AT1G13050	AT1G13040
AT2G30220	AT2G30210	AT1G29660	AT1G29590
AT1G52160	AT1G52155	AT1G25440	AT1G25425
AT2G38110	AT2G38090	AT3G11390	AT3G11370
AT2G28260	AT2G28250	AT1G77250	AT1G77210
AT1G17180	AT1G17170	AT1G31440	AT1G31420
AT1G68400	AT1G68390	AT1G11730	AT1G11720
AT1G08350	AT1G08320	AT2G15080	AT2G15042
AT2G41250	AT2G41240	AT2G28830	AT2G28800
AT1G11450	AT1G11440	AT2G19930	AT2G19910
AT2G14620	AT2G14610	AT1G63690	AT1G63680
AT1G26700	AT1G26690	AT1G65080	AT1G65060
AT1G11080	AT1G11070
AT1G73150	AT1G73130
AT3G01910	AT3G01890
AT2G24140	AT2G24130
AT2G01530	AT2G01520
AT1G05700	AT1G05690
AT1G73370	AT1G73340
AT1G72230	AT1G72220
AT2G41690	AT2G41680
AT2G45430	AT2G45420
AT1G29300	AT1G29290
AT1G69310	AT1G69295
AT1G61570	AT1G61560
AT2G29760	AT2G29750
AT1G66450	AT1G66430
AT1G66450	AT1G66440
AT2G32860	AT2G32850
AT2G37150	AT2G37130
AT2G38100	AT2G38090
AT2G25940	AT2G25930
AT1G70500	AT1G70490
AT1G08340	AT1G08320
AT2G01970	AT2G01950
AT1G23760	AT1G23750
AT2G03360	AT2G03350
AT1G70170	AT1G70160
AT2G27550	AT2G27535
AT1G33720	AT1G33700
AT1G60940	AT1G60930
AT1G52070	AT1G52050
AT1G10700	AT1G10690
AT1G75120	AT1G75110
AT1G24405	AT1G24400
AT1G14040	AT1G14030
AT1G73360	AT1G73340
AT2G28760	AT2G28755
AT1G11730	AT1G11720
AT1G54000	AT1G53940
AT2G29750	AT2G29740
AT2G17430	AT2G17410
AT1G54000	AT1G53950
AT1G66440	AT1G66430
AT2G41160	AT2G41150
AT2G30350	AT2G30340
AT2G17430	AT2G17420
AT1G51890	AT1G51880
