# Supplementary material for: Polycomb-dependent differential chromatin compartmentalization determines gene coregulation in Arabidopsis
Source: HighWire-hosted journal article supplement (doi:10.1101/gr.273771.120), 2021-06-03
Supplement: Supplemental_Table_S14.xlsx [file Supplemental_Table_S14.xlsx]

## Sheet: S14
Supplementary Table S14: C-Hi-C_Root_vs_Shoot
chr(1)	start(1)	end(1)	Gene1	strand(1)	Total Reads(1)	chr(2)	start(2)	end(2)	Gene2	strand(2)	Total Reads(2)	Probe-1	Probe-2	Distance	Interaction Reads	Expected Reads	Z-score	LogP	FDR(Benjamini, based on 2.84e+10 total tests)	Bg Interaction Reads	Bg Expected Reads	Bg Z-score	Bg LogP	Bg Total Reads Peak1	Bg Total Reads Peak2	LogP vs. Bg	Z-score Difference vs. Bg	Circos Thickness
3	283637	284137	AT3G01790	+	88	3	273977	274477	AT3G01760	+	1175	NA	Yes	9660	6	0.070444	600	-7.54896	1	2	0.070444	200	-1.33092	73	1185	-2.99279	400	2
1	27654591	27655091	AT1G73580	+	1454	1	27647590	27648090	AT1G73550	+	86	Yes	NA	7001	8	0.070444	800	-11.7462	1	3	0.070444	300	-2.53585	1721	84	-3.48055	500	4
1	23246464	23246964	AT1G62770	+	1425	1	23232634	23233134	AT1G62740	+	51	Yes	NA	13830	7	0.070444	700	-9.7123	1	4	0.070444	400	-4.00631	1209	78	-1.55749	300	2
1	6524570	6525070	AT1G18890	+	945	1	6510483	6510983	AT1G18860	+	80	Yes	NA	14087	10	0.070444	1000	-16.4878	0.021129	3	0.070444	300	-2.53619	907	82	-5.77865	700	6
1	17606462	17606962	AT1G47813	+	81	1	17604104	17604604	AT1G47810	+	1325	NA	Yes	2358	8	0.070444	800	-11.7628	1	2	0.070444	200	-1.33098	38	1341	-5.70317	600	4
1	24036045	24036545	AT1G64680	+	65	1	24029471	24029971	AT1G64660	+	1625	NA	Yes	6574	11	0.070444	1100	-19.1629	0.001688	3	0.070444	300	-2.55516	36	1730	-7.52384	800	-6
2	15980128	15980628	AT2G38130	+	50	2	15954948	15955448	AT2G38110	+	1474	NA	Yes	25180	6	0.070444	600	-7.64545	1	3	0.070444	300	-2.5525	39	1546	-1.72717	300	2
1	3876463	3876963	AT1G11540	+	202	1	3869517	3870017	AT1G11490	+	1220	NA	Yes	6946	11	0.070444	1100	-18.6454	0.002623	4	0.070444	400	-3.97999	203	1048	-4.89435	700	6
1	3888949	3889449	AT1G11580	+	1785	1	3874558	3875058	AT1G11530	+	446	Yes	Yes	14391	7	0.070444	700	-9.42839	1	4	0.070444	400	-3.97081	1643	472	-1.54083	300	2
2	14841485	14841985	AT2G35230	+	36	2	14836487	14836987	AT2G35210	+	540	NA	Yes	4998	6	0.070444	600	-7.73621	1	5	0.070444	500	-5.78549	38	559	-0.558656	100	2
3	1223480	1223980	AT3G04540	+	1420	3	1216971	1217471	AT3G04520	+	85	Yes	Yes	6509	9	0.070444	900	-14.0458	0.209809	2	0.070444	200	-1.33092	1718	72	-7.04507	700	-4
2	12938856	12939356	AT2G30362	+	104	2	12932008	12932508	AT2G30340	+	1245	NA	Yes	6848	6	0.070444	600	-7.52995	1	3	0.070444	300	-2.53435	94	1192	-1.70389	300	2
1	10879952	10880452	AT1G30670	+	77	1	10876554	10877054	AT1G30660	+	495	NA	Yes	3398	11	0.070444	1100	-19.0396	0.001885	3	0.070444	300	-2.53893	69	482	-7.15499	800	-6
1	24361493	24361993	AT1G65520	+	461	1	24358482	24358982	AT1G65500	+	822	Yes	Yes	3011	14	0.070444	1400	-26.2946	2e-06	9	0.070444	900	-13.7597	460	684	-2.1032	500	10
1	17701528	17702028	AT1G48000	+	50	1	17692138	17692638	AT1G47980	+	899	NA	Yes	9390	6	0.070444	600	-7.64545	1	4	0.070444	400	-4.02462	55	929	-0.991364	200	2
3	349459	349959	AT3G02040	+	189	3	343409	343909	AT3G02020	+	1660	NA	Yes	6050	12	0.070444	1200	-21.208	0.00023	8	0.070444	800	-11.5985	197	1702	-1.71504	400	8
1	26400530	26401030	AT1G70090	+	177	1	26396494	26396994	AT1G70080	+	848	NA	Yes	4036	14	0.070444	1400	-26.579	1e-06	6	0.070444	600	-7.49597	155	946	-4.88597	800	10
1	25261942	25262442	AT1G67430	+	129	1	25255451	25255951	AT1G67420	+	904	NA	Yes	6491	8	0.070444	800	-11.6581	1	3	0.070444	300	-2.5318	118	666	-3.45533	500	4
1	29637027	29637527	AT1G78830	+	221	1	29635422	29635922	AT1G78820	+	1469	NA	Yes	1605	42	0.070444	4200	-122.73	0	28	0.070444	2800	-71.0251	172	1684	-5.0072	1400	48
2	14693506	14694006	AT2G34830	+	112	2	14685503	14686003	AT2G34810	+	1776	Yes	Yes	8003	6	0.070444	600	-7.52252	1	0	0	0	0	0	0	0	600	2
1	29519025	29519525	AT1G78460	+	264	1	29504913	29505413	AT1G78420	+	841	NA	Yes	14112	6	0.070444	600	-7.46777	1	4	0.070444	400	-3.97576	275	938	-0.991123	200	2
2	17999555	18000055	AT2G43320	+	79	2	17988968	17989468	AT2G43270	+	1285	NA	Yes	10587	8	0.070444	800	-11.77	1	2	0.070444	200	-1.33092	72	1295	-5.55093	600	4
3	239524	240024	AT3G01640	+	786	3	236551	237051	AT3G01620	+	124	Yes	NA	2973	10	0.070444	1000	-16.3128	0.024245	8	0.070444	800	-11.64	896	144	-0.897924	200	6
1	1593936	1594436	AT1G05430	+	69	1	1584447	1584947	AT1G05400	+	1756	NA	Yes	9489	13	0.070444	1300	-24.515	1e-05	7	0.070444	700	-9.63664	66	1835	-3.13531	600	8
2	9976303	9976803	AT2G23430	+	363	2	9974940	9975440	AT2G23420	+	58	Yes	NA	1363	12	0.070444	1200	-21.9451	0.000119	4	0.070444	400	-4.02578	377	54	-6.33015	800	8
1	18226404	18226904	AT1G49260	+	1718	1	18216973	18217473	AT1G49240	+	166	Yes	NA	9431	8	0.070444	800	-11.6195	1	4	0.070444	400	-3.98502	1467	155	-2.2262	400	4
2	16237067	16237567	AT2G38870	+	288	2	16227078	16227578	AT2G38840	+	990	Yes	Yes	9989	6	0.070444	600	-7.46446	1	1	0.070444	100	-0.457165	193	1083	-5.64325	500	2
3	82421	82921	AT3G01270	+	62	3	74447	74947	AT3G01220	+	944	NA	Yes	7974	9	0.070444	900	-14.1828	0.188453	6	0.070444	600	-7.62477	55	1143	-1.39561	300	4
2	17398054	17398554	AT2G41705	+	54	2	17394928	17395428	AT2G41700	+	823	NA	Yes	3126	6	0.070444	600	-7.62858	1	1	0.070444	100	-0.452312	46	572	-5.75353	500	2
1	18991384	18991884	AT1G51220	+	1224	1	18986017	18986517	AT1G51200	+	94	Yes	NA	5367	8	0.070444	800	-11.7235	1	2	0.070444	200	-1.33091	1185	101	-5.50494	600	4
1	24862968	24863468	AT1G66660	+	976	1	24853509	24854009	AT1G66620	+	108	Yes	NA	9459	9	0.070444	900	-13.9691	0.221417	5	0.070444	500	-5.68102	1032	91	-2.06039	400	4
1	12180939	12181439	AT1G33600	+	1342	1	12171560	12172060	AT1G33560	+	70	Yes	NA	9379	9	0.070444	900	-14.1244	0.197602	2	0.070444	200	-1.33093	1585	53	-7.13374	700	-4
2	12777010	12777510	AT2G29970	+	83	2	12767588	12768088	AT2G29950	+	394	NA	Yes	9422	6	0.070444	600	-7.55645	1	0	0.070444	0	1.00566	89	394	1.00566	600	2
1	7994192	7994692	AT1G22610	+	52	1	7989046	7989546	AT1G22600	+	1069	NA	Yes	5146	9	0.070444	900	-14.2831	0.172462	4	0.070444	400	-4.04424	42	1376	-3.16168	500	4
1	24045034	24045534	AT1G64710	+	604	1	24032562	24033062	AT1G64670	+	756	Yes	Yes	12472	7	0.070444	700	-9.41929	1	2	0.070444	200	-1.33089	648	750	-4.11068	500	2
1	18226356	18226856	AT1G49260	+	1718	1	18218529	18219029	AT1G49245	+	141	Yes	NA	7827	7	0.070444	700	-9.50481	1	3	0.070444	300	-2.52919	1467	160	-2.50097	400	2
1	20057983	20058483	AT1G53720	+	74	1	20056028	20056528	AT1G53710	+	1551	NA	Yes	1955	17	0.070444	1700	-36.2284	0	5	0.070444	500	-5.68706	84	1692	-10.3349	1200	-14
1	21390507	21391007	AT1G57760	+	48	1	21381004	21381504	AT1G57730	+	1804	NA	Yes	9503	8	0.070444	800	-11.965	1	0	0	0	0	0	0	0	800	4
1	22924533	22925033	AT1G62030	+	63	1	22920421	22920921	AT1G62020	+	719	NA	Yes	4112	10	0.070444	1000	-16.6254	0.018778	7	0.070444	700	-9.69959	53	613	-1.34276	300	6
1	26420521	26421021	AT1G70160	+	1445	1	26407961	26408461	AT1G70110	+	1887	Yes	Yes	12560	6	0.142825	295.932	-7.43547	1	0	0	0	0	0	0	0	295.932	2
1	4557577	4558077	AT1G13300	+	1391	1	4548438	4548938	AT1G13280	+	61	Yes	NA	9139	7	0.070444	700	-9.65752	1	2	0.070444	200	-1.33092	1200	68	-4.2012	500	2
1	21930042	21930542	AT1G59670	+	657	1	21929043	21929543	AT1G59660	+	778	Yes	Yes	999	25	0.070444	2500	-59.391	0	14	0.070444	1400	-26.2427	658	729	-4.75251	1100	22
2	7575430	7575930	AT2G17442	+	72	2	7565475	7565975	AT2G17420	+	1768	NA	Yes	9955	11	0.070444	1100	-19.0857	0.001811	4	0.070444	400	-4.00745	76	1366	-5.04313	700	6
1	24494613	24495113	AT1G65850	+	862	1	24469515	24470015	AT1G65790	+	1242	Yes	Yes	25098	8	0.070444	800	-11.5132	1	3	0.075137	281.264	-2.52306	1049	1385	-4.44126	518.736	4
1	20458075	20458575	AT1G54860	+	76	1	20451004	20451504	AT1G54830	+	570	NA	Yes	7071	7	0.070444	700	-9.60344	1	2	0.070444	200	-1.33092	63	706	-4.2096	500	2
1	24422922	24423422	AT1G65670	+	724	1	24417088	24417588	AT1G65650	+	112	Yes	NA	5834	7	0.070444	700	-9.5343	1	3	0.070444	300	-2.5303	580	139	-2.50454	400	2
2	18174382	18174882	AT2G43880	+	74	2	18161584	18162084	AT2G43850	+	1687	NA	Yes	12798	10	0.070444	1000	-16.5288	0.020423	4	0.070444	400	-4.01128	70	1638	-4.01829	600	6
1	4392549	4393049	AT1G12900	+	82	1	4389965	4390465	AT1G12880	+	1769	NA	Yes	2584	32	0.070444	3200	-89.1711	0	16	0.070444	1600	-33.6809	57	1811	-10.2186	1600	-34
1	8399966	8400466	AT1G23750	+	969	1	8395501	8396001	AT1G23730	+	1266	Yes	Yes	4465	14	0.070444	1400	-26.2039	2e-06	8	0.086454	651.855	-11.5057	1231	1358	-4.90475	748.145	10
1	7438858	7439358	AT1G21250	+	52	1	7430597	7431097	AT1G21230	+	1238	NA	Yes	8261	7	0.070444	700	-9.70582	1	4	0.070444	400	-4.03381	48	1008	-1.57107	300	2
2	17991417	17991917	AT2G43290	+	267	2	17988897	17989397	AT2G43270	+	1285	NA	Yes	2520	23	0.070444	2300	-53.4587	0	13	0.070444	1300	-23.7815	224	1295	-4.45611	1000	20
1	18172006	18172506	AT1G49110	+	884	1	18167464	18167964	AT1G49100	+	119	Yes	Yes	4542	15	0.070444	1500	-29.641	0	6	0.070444	600	-7.52001	979	115	-5.90075	900	10
1	23246418	23246918	AT1G62770	+	1425	1	23234975	23235475	AT1G62750	+	54	Yes	NA	11443	8	0.070444	800	-11.9087	1	5	0.070444	500	-5.75034	1209	47	-1.47314	300	4
1	6524596	6525096	AT1G18890	+	945	1	6518554	6519054	AT1G18870	+	88	Yes	NA	6042	11	0.070444	1100	-18.9577	0.002023	2	0.070444	200	-1.33094	907	51	-10.5942	900	-6
2	168989	169489	AT2G01370	+	1398	2	167509	168009	AT2G01360	+	944	Yes	Yes	1480	77	0.070444	7700	-264.659	0	54	0.070444	5400	-166.771	1200	957	-6.18742	2300	104
1	6524976	6525476	AT1G18890	+	1335	1	6519451	6519951	AT1G18871	+	35	Yes	NA	5525	6	0.070444	600	-7.74569	1	5	0.070444	500	-5.82799	1638	31	-0.553237	100	2
1	17002034	17002534	AT1G44970	+	737	1	17000487	17000987	AT1G44960	+	341	Yes	Yes	1547	26	0.070444	2600	-63.1297	0	6	0.070444	600	-7.46777	655	264	-19.6397	2000	-24
1	24035526	24036026	AT1G64680	+	74	1	24032508	24033008	AT1G64670	+	756	NA	Yes	3018	9	0.070444	900	-14.1002	0.201394	2	0.070444	200	-1.33095	47	750	-7.17797	700	-4
2	8074021	8074521	AT2G18600	+	815	2	8060030	8060530	AT2G18560	+	115	Yes	NA	13991	10	0.070444	1000	-16.3373	0.023794	6	0.070444	600	-7.52428	909	110	-1.918	400	6
3	3058563	3059063	AT3G09940	+	76	3	3054040	3054540	AT3G09930	+	1457	NA	Yes	4523	11	0.070444	1100	-19.0483	0.001871	2	0.070444	200	-1.33094	49	1721	-10.622	900	-6
1	12257925	12258425	AT1G33790	+	599	1	12235428	12235928	AT1G33750	+	96	Yes	NA	22497	6	0.070444	600	-7.53864	1	2	0.070444	200	-1.33092	791	67	-2.99735	400	2
3	6496970	6497470	AT3G18840	+	691	3	6488486	6488986	AT3G18830	+	94	Yes	NA	8484	9	0.070444	900	-14.0111	0.214985	3	0.070444	300	-2.53694	690	78	-4.57866	600	4
1	21936449	21936949	AT1G59700	+	1403	1	21929059	21929559	AT1G59660	+	778	Yes	Yes	7390	15	0.070444	1500	-28.9533	0	2	0.070444	200	-1.33089	1323	729	-17.4379	1300	-10
2	15050514	15051014	AT2G35820	+	871	2	15048506	15049006	AT2G35800	+	194	Yes	NA	2008	8	0.070444	800	-11.6003	1	5	0.070444	500	-5.64545	739	181	-1.44501	300	4
1	3888993	3889493	AT1G11580	+	1785	1	3879427	3879927	AT1G11545	+	537	Yes	Yes	9566	10	0.070444	1000	-16.0782	0.029292	4	0.070444	400	-3.96953	1643	579	-3.8655	600	6
3	5395962	5396462	AT3G15940	+	1335	3	5385429	5385929	AT3G15920	+	47	Yes	NA	10533	11	0.070444	1100	-19.4782	0.00125	4	0.070444	400	-4.03233	1375	49	-5.18726	700	6
3	4378009	4378509	AT3G13440	+	1455	3	4365450	4365950	AT3G13420	+	112	Yes	NA	12559	12	0.070444	1200	-21.4233	0.000191	3	0.070444	300	-2.53155	1635	121	-8.38932	900	-8
1	6611168	6611668	AT1G19140	+	438	1	6607974	6608474	AT1G19120	+	97	Yes	NA	3194	14	0.070444	1400	-26.9772	1e-06	9	0.070444	900	-13.937	505	122	-2.15587	500	10
3	4355662	4356162	AT3G13400	+	45	3	4352360	4352860	AT3G13390	+	424	NA	Yes	3302	8	0.070444	800	-11.9993	1	5	0.070444	500	-5.74437	49	432	-1.47145	300	4
3	1223423	1223923	AT3G04540	+	1420	3	1221927	1222427	AT3G04530	+	628	Yes	Yes	1496	31	0.070444	3100	-79.7662	0	15	0.070444	1500	-29.0818	1718	376	-8.09008	1600	-30
2	6544502	6545002	AT2G15110	+	28	2	6533862	6534362	AT2G15080	+	1241	NA	Yes	10640	7	0.070444	700	-10.0041	1	6	0.070444	600	-7.77799	32	1446	-0.560002	100	2
1	249893	250393	AT1G01690	+	1191	1	245511	246011	AT1G01670	+	221	Yes	NA	4382	9	0.070444	900	-13.828	0.245032	5	0.070444	500	-5.64055	1169	210	-2.03376	400	4
1	18440525	18441025	AT1G49810	+	32	1	18436811	18437311	AT1G49790	+	453	NA	Yes	3714	6	0.070444	600	-7.77799	1	1	0.070444	100	-0.446907	25	544	-5.88519	500	2
1	24205409	24205909	AT1G65150	+	937	1	24189025	24189525	AT1G65113	+	74	Yes	NA	16384	6	0.070444	600	-7.57257	1	1	0.070444	100	-0.455432	1080	90	-5.68182	500	2
2	125396	125896	AT2G01220	+	55	2	120067	120567	AT2G01210	+	572	NA	Yes	5329	8	0.070444	800	-11.9006	1	2	0.070444	200	-1.33096	44	406	-5.65774	600	4
2	17998490	17998990	AT2G43320	+	82	2	17990413	17990913	AT2G43280	+	944	NA	Yes	8077	6	0.070444	600	-7.55806	1	1	0.070444	100	-0.454618	72	693	-5.70024	500	2
2	174505	175005	AT2G01400	+	95	2	167984	168484	AT2G01360	+	1296	NA	Yes	6521	10	0.070444	1000	-16.4092	0.022506	9	0.070444	900	-14.0146	93	1278	-0.595841	100	6
3	240480	240980	AT3G01640	+	685	3	237081	237581	AT3G01630	+	127	Yes	NA	3399	6	0.070444	600	-7.51118	1	1	0.070444	100	-0.455974	537	108	-5.66967	500	2
1	18226369	18226869	AT1G49260	+	1718	1	18223509	18224009	AT1G49250	+	177	Yes	Yes	2860	24	0.070444	2400	-57.2496	0	19	0.070444	1900	-41.3765	1467	148	-1.64751	500	22
1	24052518	24053018	AT1G64750	+	91	1	24045071	24045571	AT1G64710	+	604	NA	Yes	7447	6	0.070444	600	-7.54487	1	3	0.070444	300	-2.53262	109	648	-1.70175	300	2
1	10200537	10201037	AT1G29180	+	1499	1	10179978	10180478	AT1G29140	+	133	Yes	NA	20559	6	0.070444	600	-7.50737	1	4	0.070444	400	-3.988	1456	136	-0.991153	200	2
1	18991099	18991599	AT1G51220	+	1350	1	18988934	18989434	AT1G51210	+	116	Yes	Yes	2165	10	0.070444	1000	-16.3344	0.023844	1	0.070444	100	-0.454036	1364	63	-14.1747	900	-6
1	9393918	9394418	AT1G27050	+	104	1	9389313	9389813	AT1G27040	+	777	NA	Yes	4605	10	0.070444	1000	-16.3733	0.023149	3	0.070444	300	-2.53262	109	798	-5.72514	700	6
1	20701462	20701962	AT1G55440	+	87	1	20677568	20678068	AT1G55380	+	1273	NA	Yes	23894	7	0.070444	700	-9.57604	1	4	0.070444	400	-4.01128	70	1335	-1.55989	300	2
2	1005845	1006345	AT2G03310	+	592	2	1000103	1000603	AT2G03290	+	67	Yes	NA	5742	6	0.070444	600	-7.58823	1	5	0.070444	500	-5.68706	477	84	-0.571093	100	2
1	24045425	24045925	AT1G64710	+	590	1	24037077	24037577	AT1G64680	+	100	Yes	NA	8348	6	0.070444	600	-7.53411	1	4	0.070444	400	-3.99125	707	120	-0.991164	200	2
1	533593	534093	AT1G02530	+	101	1	518097	518597	AT1G02500	+	1200	NA	Yes	15496	6	0.070444	600	-7.53304	1	3	0.070444	300	-2.53536	87	1264	-1.70515	300	2
2	17294364	17294864	AT2G41473	+	1102	2	17286049	17286549	AT2G41460	+	63	Yes	NA	8315	8	0.070444	800	-11.8454	1	3	0.070444	300	-2.54378	1240	54	-3.53131	500	4
1	9393955	9394455	AT1G27050	+	104	1	9392029	9392529	AT1G27045	+	908	NA	Yes	1926	17	0.070444	1700	-35.6807	0	8	0.070444	800	-11.6902	109	984	-5.11029	900	14
1	20860999	20861499	AT1G55810	+	54	1	20855394	20855894	AT1G55790	+	1193	NA	Yes	5605	9	0.070444	900	-14.2598	0.176132	5	0.070444	500	-5.73888	51	1220	-2.10061	400	4
1	25747863	25748363	AT1G68570	+	527	1	25741348	25741848	AT1G68560	+	73	Yes	NA	6515	6	0.070444	600	-7.57462	1	3	0.070444	300	-2.53303	631	105	-1.70226	300	2
1	23345011	23345511	AT1G63005	+	96	1	23328707	23329207	AT1G62975	+	669	NA	Yes	16304	6	0.070444	600	-7.53864	1	2	0.070444	200	-1.33091	85	827	-2.98568	400	2
1	27508577	27509077	AT1G73165	+	1377	1	27497945	27498445	AT1G73120	+	1093	Yes	Yes	10632	9	0.078835	804.21	-13.7236	0.265274	6	0.093757	450.807	-7.4368	1486	1220	-2.48393	353.402	4
1	26420546	26421046	AT1G70160	+	1445	1	26409033	26409533	AT1G70120	+	542	Yes	NA	11513	8	0.070444	800	-11.528	1	1	0.070444	100	-0.458228	1574	651	-9.41744	700	-4
2	619507	620007	AT2G02360	+	57	2	616094	616594	AT2G02340	+	251	NA	Yes	3413	6	0.070444	600	-7.61756	1	2	0.070444	200	-1.33094	49	171	-3.01808	400	2
2	7575005	7575505	AT2G17442	+	58	2	7568520	7569020	AT2G17430	+	1104	NA	Yes	6485	11	0.070444	1100	-19.2603	0.001541	4	0.070444	400	-4.00522	80	1024	-5.03069	700	6
2	6828968	6829468	AT2G15670	+	242	2	6824925	6825425	AT2G15660	+	40	Yes	NA	4043	8	0.070444	800	-12.0688	1	4	0.070444	400	-4.04629	254	41	-2.30451	400	4
1	10902971	10903471	AT1G30740	+	104	1	10895488	10895988	AT1G30710	+	948	NA	Yes	7483	11	0.070444	1100	-18.8708	0.002175	8	0.070444	800	-11.7431	87	985	-1.2832	300	6
3	604012	604512	AT3G02780	+	562	3	597935	598435	AT3G02760	+	53	Yes	NA	6077	6	0.070444	600	-7.63255	1	1	0.070444	100	-0.452703	331	49	-5.74437	500	2
2	13018981	13019481	AT2G30570	+	101	2	13011602	13012102	AT2G30540	+	1526	NA	Yes	7379	12	0.070444	1200	-21.4821	0.000181	10	0.070444	1000	-16.4006	97	1685	-0.875061	200	8
1	8400551	8401051	AT1G23750	+	739	1	8399600	8400100	AT1G23740	+	205	Yes	NA	951	24	0.070444	2400	-57.0347	0	13	0.070444	1300	-23.8205	863	199	-5.14679	1100	22
1	7439543	7440043	AT1G21250	+	67	1	7434960	7435460	AT1G21240	+	592	NA	Yes	4583	6	0.070444	600	-7.58823	1	1	0.070444	100	-0.454781	75	573	-5.69654	500	2
2	17991482	17991982	AT2G43290	+	267	2	17990476	17990976	AT2G43280	+	944	NA	Yes	1006	51	0.070444	5100	-158.313	0	32	0.070444	3200	-84.7167	224	693	-7.13161	1900	-62
1	12451981	12452481	AT1G34190	+	755	1	12441523	12442023	AT1G34160	+	74	Yes	NA	10458	8	0.070444	800	-11.7899	1	4	0.070444	400	-4.00928	826	73	-2.25619	400	4
1	22223455	22223955	AT1G60270	+	1678	1	22217497	22217997	AT1G60250	+	86	Yes	NA	5958	15	0.070444	1500	-29.9723	0	7	0.070444	700	-9.64875	1643	63	-4.78661	800	10
2	8084499	8084999	AT2G18640	+	716	2	8073621	8074121	AT2G18600	+	1100	Yes	Yes	10878	9	0.070444	900	-13.7374	0.262544	2	0.070444	200	-1.33089	830	744	-6.8366	700	4
1	23246485	23246985	AT1G62770	+	1425	1	23238521	23239021	AT1G62760	+	36	Yes	NA	7964	7	0.070444	700	-9.85655	1	2	0.070444	200	-1.331	1209	33	-4.31895	500	2
2	8074358	8074858	AT2G18600	+	1186	2	8064440	8064940	AT2G18570	+	78	Yes	NA	9918	9	0.070444	900	-14.0785	0.20475	4	0.070444	400	-3.99973	1212	92	-3.05352	500	4
3	5545508	5546008	AT3G16340	+	59	3	5535555	5536055	AT3G16330	+	1457	Yes	Yes	9953	10	0.070444	1000	-16.6701	0.01803	3	0.070444	300	-2.53945	67	1110	-5.82844	700	6
1	24606079	24606579	AT1G66100	+	1650	1	24593465	24593965	AT1G66060	+	127	Yes	NA	12614	6	0.070444	600	-7.51118	1	5	0.070444	500	-5.69424	1633	77	-0.570191	100	2
1	25770469	25770969	AT1G68640	+	77	1	25759958	25760458	AT1G68600	+	905	NA	Yes	10511	9	0.070444	900	-14.0837	0.203941	1	0.070444	100	-0.45418	65	1066	-11.8338	800	-4
1	21936027	21936527	AT1G59700	+	630	1	21929919	21930419	AT1G59670	+	657	Yes	Yes	6108	12	0.070444	1200	-20.9962	0.000277	2	0.070444	200	-1.33089	707	658	-11.7546	1000	-8
2	18319465	18319965	AT2G44350	+	58	2	18307469	18307969	AT2G44300	+	1345	NA	Yes	11996	7	0.070444	700	-9.67187	1	1	0.070444	100	-0.455115	82	1839	-7.55806	600	-2
1	10062597	10063097	AT1G28630	+	1034	1	10052527	10053027	AT1G28600	+	170	Yes	NA	10070	10	0.070444	1000	-16.2289	0.025903	2	0.070444	200	-1.3309	1098	210	-8.45101	800	-6
1	18897520	18898020	AT1G50970	+	81	1	18890371	18890871	AT1G50960	+	936	NA	Yes	7149	8	0.070444	800	-11.7628	1	3	0.070444	300	-2.53755	75	949	-3.49128	500	4
1	21936031	21936531	AT1G59700	+	630	1	21932055	21932555	AT1G59675	+	328	Yes	Yes	3976	8	0.070444	800	-11.5541	1	2	0.070444	200	-1.33089	707	301	-5.43186	600	4
2	10453970	10454470	AT2G24600	+	62	2	10432433	10432933	AT2G24560	+	1049	NA	Yes	21537	7	0.070444	700	-9.65306	1	2	0.070444	200	-1.33094	52	1083	-4.23411	500	2
2	8116835	8117335	AT2G18721	+	447	2	8114009	8114509	AT2G18710	+	134	Yes	NA	2826	7	0.070444	700	-9.51073	1	5	0.070444	500	-5.65833	341	133	-0.957066	200	2
3	3496984	3497484	AT3G11160	+	55	3	3480046	3480546	AT3G11110	+	1635	NA	Yes	16938	6	0.070444	600	-7.62477	1	3	0.070444	300	-2.54154	60	2009	-1.71294	300	2
3	4377957	4378457	AT3G13440	+	1455	3	4368444	4368944	AT3G13430	+	471	Yes	Yes	9513	13	0.070444	1300	-23.6209	2.3e-05	3	0.070444	300	-2.52475	1635	413	-9.6386	1000	-8
1	6611134	6611634	AT1G19140	+	438	1	6609968	6610468	AT1G19130	+	124	Yes	NA	1166	16	0.070444	1600	-32.5043	0	11	0.070444	1100	-18.7797	505	129	-1.99425	500	12
3	4377460	4377960	AT3G13440	+	668	3	4371491	4371991	AT3G13432	+	216	Yes	NA	5969	7	0.070444	700	-9.46574	1	1	0.070444	100	-0.457441	678	236	-7.4725	600	-2
1	20283103	20283603	AT1G54340	+	1562	1	20271557	20272057	AT1G54300	+	517	Yes	Yes	11546	12	0.070444	1200	-21.0158	0.000273	6	0.070444	600	-7.44944	1884	491	-3.17944	600	8
2	7422026	7422526	AT2G17060	+	810	2	7408889	7409389	AT2G17043	+	93	Yes	NA	13137	7	0.070444	700	-9.56391	1	4	0.070444	400	-4.00928	800	73	-1.55892	300	2
1	26157551	26158051	AT1G69560	+	105	1	26147040	26147540	AT1G69540	+	1591	NA	Yes	10511	6	0.070444	600	-7.52895	1	3	0.070444	300	-2.53435	94	2014	-1.70389	300	2
2	348394	348894	AT2G01810	+	867	2	344044	344544	AT2G01800	+	1258	Yes	Yes	4350	23	0.070444	2300	-52.8337	0	14	0.070444	1400	-26.2199	811	1257	-3.58656	900	20
3	4377110	4377610	AT3G13440	+	1471	3	4376397	4376897	AT3G13437	+	804	Yes	Yes	713	24	0.070444	2400	-56.0626	0	18	0.105147	1205.93	-37.4664	1850	1099	-6.50853	1194.07	22
1	29518987	29519487	AT1G78460	+	264	1	29512601	29513101	AT1G78440	+	1636	NA	Yes	6386	18	0.070444	1800	-37.8715	0	9	0.070444	900	-13.8021	275	1861	-4.6177	900	14
3	294577	295077	AT3G01820	+	999	3	281015	281515	AT3G01780	+	93	Yes	NA	13562	7	0.070444	700	-9.56391	1	2	0.070444	200	-1.33091	1018	98	-4.16939	500	2
2	6287540	6288040	AT2G14692	+	991	2	6281043	6281543	AT2G14680	+	45	Yes	NA	6497	8	0.070444	800	-11.9993	1	5	0.070444	500	-5.80148	847	35	-1.48804	300	4
1	8877964	8878464	AT1G25320	+	1341	1	8858425	8858925	AT1G25270	+	93	Yes	NA	19539	6	0.070444	600	-7.5423	1	3	0.070444	300	-2.53336	1556	102	-1.70266	300	2
1	8245065	8245565	AT1G23230	+	50	1	8234136	8234636	AT1G23205	+	1750	NA	Yes	10929	8	0.070444	800	-11.9446	1	4	0.070444	400	-4.04845	40	1906	-2.30743	400	4
1	20156010	20156510	AT1G54000	+	1563	1	20152421	20152921	AT1G53990	+	90	Yes	NA	3589	17	0.070444	1700	-35.8872	0	9	0.070444	900	-14.2283	1769	57	-4.32904	800	14
2	10881065	10881565	AT2G25560	+	93	2	10871993	10872493	AT2G25540	+	847	NA	Yes	9072	7	0.070444	700	-9.56391	1	2	0.070444	200	-1.3309	114	657	-4.15946	500	2
2	6298957	6299457	AT2G14710	+	103	2	6287592	6288092	AT2G14692	+	991	NA	Yes	11365	10	0.070444	1000	-16.3769	0.023083	6	0.070444	600	-7.54487	91	847	-1.92679	400	6
1	8879544	8880044	AT1G25320	+	287	1	8860954	8861454	AT1G25275	+	1472	Yes	Yes	18590	8	0.070444	800	-11.5636	1	2	0.070444	200	-1.33089	285	1685	-5.43388	600	4
2	16237042	16237542	AT2G38870	+	288	2	16234913	16235413	AT2G38860	+	1819	Yes	Yes	2129	27	0.070444	2700	-66.6903	0	9	0.070444	900	-13.8473	193	2000	-13.5192	1800	-26
2	1019506	1020006	AT2G03350	+	63	2	1008845	1009345	AT2G03330	+	1276	NA	Yes	10661	8	0.070444	800	-11.8454	1	2	0.070444	200	-1.33091	81	1470	-5.53298	600	4
1	4310459	4310959	AT1G12663	+	54	1	4299004	4299504	AT1G12630	+	1857	NA	Yes	11455	10	0.070444	1000	-16.7361	0.016965	0	0	0	0	0	0	0	1000	6
1	10200560	10201060	AT1G29180	+	1499	1	10181545	10182045	AT1G29150	+	173	Yes	NA	19015	8	0.070444	800	-11.6141	1	5	0.070444	500	-5.65143	1456	155	-1.44653	300	4
1	19232052	19232552	AT1G51810	+	848	1	19222046	19222546	AT1G51805	+	52	Yes	NA	10006	7	0.070444	700	-9.70582	1	1	0.070444	100	-0.452448	634	47	-7.66008	600	-2
1	24862076	24862576	AT1G66660	+	695	1	24858453	24858953	AT1G66640	+	195	Yes	NA	3623	14	0.070444	1400	-26.5357	1e-06	5	0.070444	500	-5.6445	757	186	-6.37179	900	10
1	20702473	20702973	AT1G55440	+	62	1	20682504	20683004	AT1G55390	+	1392	NA	Yes	19969	6	0.070444	600	-7.60166	1	2	0.070444	200	-1.33093	54	1494	-3.01086	400	2
1	530892	531392	AT1G02530	+	104	1	520619	521119	AT1G02510	+	1013	NA	Yes	10273	6	0.070444	600	-7.52995	1	5	0.070444	500	-5.67797	95	1047	-0.572234	100	2
1	21389979	21390479	AT1G57760	+	67	1	21385405	21385905	AT1G57750	+	892	NA	Yes	4574	6	0.070444	600	-7.58823	1	3	0.070444	300	-2.5426	57	879	-1.71429	300	2
1	7853447	7853947	AT1G22240	+	84	1	7846178	7846678	AT1G22220	+	343	NA	Yes	7269	6	0.070444	600	-7.55488	1	1	0.070444	100	-0.455635	96	307	-5.67725	500	2
1	23345323	23345823	AT1G63005	+	49	1	23333534	23334034	AT1G62981	+	666	NA	Yes	11789	6	0.070444	600	-7.65012	1	1	0.070444	100	-0.451865	43	759	-5.76405	500	2
1	19293546	19294046	AT1G51915	+	523	1	19282053	19282553	AT1G51900	+	1295	Yes	Yes	11493	6	0.070444	600	-7.44814	1	1	0.070444	100	-0.458205	619	1262	-5.62052	500	2
3	6541609	6542109	AT3G18957	+	138	3	6525158	6525658	AT3G18930	+	1267	NA	Yes	16451	8	0.070444	800	-11.6467	1	4	0.070444	400	-3.98633	146	1489	-2.22779	400	4
2	9628583	9629083	AT2G22660	+	34	2	9623155	9623655	AT2G22640	+	1121	NA	Yes	5428	7	0.070444	700	-9.88631	1	1	0.070444	100	-0.438915	15	1356	-8.25685	600	-2
2	15108984	15109484	AT2G35970	+	308	2	15107875	15108375	AT2G35960	+	1157	Yes	Yes	1109	7	0.070444	700	-9.44405	1	5	0.070444	500	-5.62608	401	1379	-0.957016	200	2
1	11004391	11004891	AT1G30920	+	1648	1	10988977	10989477	AT1G30860	+	74	Yes	NA	15414	7	0.070444	700	-9.60933	1	4	0.070444	400	-4.00804	1612	75	-1.55832	300	2
1	27508505	27509005	AT1G73165	+	1377	1	27499519	27500019	AT1G73130	+	1362	Yes	Yes	8986	12	0.098237	860.501	-20.9485	0.000289	10	0.110434	637.886	-16.0353	1486	1437	-1.57127	222.615	8
1	9846611	9847111	AT1G28190	+	32	1	9841465	9841965	AT1G28170	+	1243	NA	Yes	5146	10	0.070444	1000	-17.3074	0.009699	2	0.070444	200	-1.33132	17	1298	-10.0532	800	-6
2	12968467	12968967	AT2G30432	+	1282	2	12957067	12957567	AT2G30400	+	120	Yes	NA	11400	13	0.070444	1300	-24.0554	1.5e-05	7	0.070444	700	-9.53302	1133	113	-3.04378	600	8
3	604031	604531	AT3G02780	+	562	3	600995	601495	AT3G02770	+	76	Yes	NA	3036	14	0.070444	1400	-27.2313	1e-06	1	0.070444	100	-0.454781	331	75	-24.4261	1300	-10
1	24513482	24513982	AT1G65890	+	1196	1	24497442	24497942	AT1G65850	+	101	Yes	Yes	16040	8	0.070444	800	-11.7067	1	4	0.070444	400	-3.99616	1235	102	-2.23981	400	4
2	450086	450586	AT2G01960	+	36	2	443977	444477	AT2G01950	+	1040	NA	Yes	6109	10	0.070444	1000	-17.1447	0.011402	7	0.070444	700	-9.90267	33	1206	-1.37122	300	6
2	8249927	8250427	AT2G19040	+	739	2	8242872	8243372	AT2G19010	+	261	Yes	Yes	7055	11	0.070444	1100	-18.5927	0.002746	2	0.070444	200	-1.33089	704	230	-10.1035	900	-6
2	17251477	17251977	AT2G41380	+	987	2	17237517	17238017	AT2G41370	+	156	Yes	Yes	13960	12	0.070444	1200	-21.2734	0.000217	5	0.070444	500	-5.65833	1047	133	-4.42158	700	8
1	3511416	3511916	AT1G10620	+	910	1	3497027	3497527	AT1G10586	+	89	Yes	Yes	14389	6	0.070444	600	-7.54756	1	0	0.070444	0	1.00536	1045	94	1.00536	600	2
1	12451627	12452127	AT1G34190	+	1769	1	12443972	12444472	AT1G34170	+	53	Yes	NA	7655	6	0.070444	600	-7.63255	1	0	0	0	0	0	0	0	600	2
1	18249544	18250044	AT1G49330	+	80	1	18234571	18235071	AT1G49300	+	610	NA	Yes	14973	6	0.070444	600	-7.56141	1	2	0.070444	200	-1.33092	69	658	-2.99574	400	2
1	22223547	22224047	AT1G60270	+	1678	1	22220086	22220586	AT1G60260	+	47	Yes	NA	3461	13	0.070444	1300	-25.0594	6e-06	5	0.070444	500	-5.83581	1643	30	-6.19857	800	8
1	8867028	8867528	AT1G25290	+	163	1	8860629	8861129	AT1G25275	+	1362	NA	Yes	6399	18	0.070444	1800	-38.2138	0	10	0.070444	1000	-16.2189	178	1512	-3.75497	800	14
1	24814106	24814606	AT1G66510	+	82	1	24812005	24812505	AT1G66500	+	1132	NA	Yes	2101	12	0.070444	1200	-21.6231	0.00016	8	0.070444	800	-11.823	67	1108	-1.76552	400	8
3	4824615	4825115	AT3G14430	+	326	3	4822068	4822568	AT3G14420	+	48	Yes	NA	2547	8	0.070444	800	-11.965	1	6	0.070444	600	-7.59074	350	66	-0.932482	200	4
1	18025565	18026065	AT1G48740	+	1299	1	17986501	17987001	AT1G48640	+	1511	Yes	Yes	39064	10	0.102811	685.184	-16.038	0.030243	5	0.10517	334.907	-5.61495	1363	1492	-3.4558	350.278	6
2	14500530	14501030	AT2G34357	+	109	2	14493159	14493659	AT2G34350	+	1578	NA	Yes	7371	9	0.070444	900	-13.9665	0.221772	4	0.070444	400	-4.00274	85	1610	-3.06053	500	4
2	7933600	7934100	AT2G18230	+	96	2	7913441	7913941	AT2G18180	+	1573	NA	Yes	20159	6	0.070444	600	-7.53864	1	1	0.070444	100	-0.455358	88	1517	-5.68349	500	2
1	24606379	24606879	AT1G66100	+	791	1	24597573	24598073	AT1G66070	+	94	Yes	NA	8806	6	0.070444	600	-7.54105	1	0	0.070444	0	1.00484	708	104	1.00484	600	2
1	3889963	3890463	AT1G11580	+	287	1	3882468	3882968	AT1G11560	+	986	Yes	Yes	7495	8	0.070444	800	-11.5636	1	3	0.070444	300	-2.52652	253	939	-3.42314	500	4
2	14119548	14120048	AT2G33320	+	89	2	14115379	14115879	AT2G33310	+	275	NA	Yes	4169	7	0.070444	700	-9.57181	1	2	0.070444	200	-1.3309	108	203	-4.16283	500	2
1	21937522	21938022	AT1G59700	+	439	1	21933911	21934411	AT1G59680	+	854	Yes	Yes	3611	21	0.070444	2100	-46.7751	0	7	0.070444	700	-9.42733	460	768	-10.2022	1400	-18
1	10059962	10060462	AT1G28630	+	90	1	10054986	10055486	AT1G28610	+	1289	Yes	Yes	4976	11	0.070444	1100	-18.9451	0.002045	2	0.070444	200	-1.33092	65	1711	-10.451	900	-6
1	24435612	24436112	AT1G65700	+	136	1	24423463	24423963	AT1G65670	+	1169	NA	Yes	12149	6	0.070444	600	-7.50559	1	3	0.070444	300	-2.52938	156	1262	-1.69777	300	2
2	8116871	8117371	AT2G18721	+	447	2	8115596	8116096	AT2G18720	+	90	Yes	Yes	1275	11	0.070444	1100	-18.9451	0.002045	4	0.070444	400	-4.01941	341	60	-5.11123	700	6
2	7423488	7423988	AT2G17060	+	475	2	7415402	7415902	AT2G17050	+	1048	Yes	Yes	8086	12	0.070444	1200	-21.0254	0.00027	4	0.070444	400	-3.9709	466	1007	-5.91265	800	8
1	20284032	20284532	AT1G54340	+	955	1	20274487	20274987	AT1G54310	+	111	Yes	NA	9545	9	0.070444	900	-13.9615	0.222608	1	0.070444	100	-0.456117	820	114	-11.681	800	-4
2	2507	3007	AT2G01008	+	1866	3	14198787	14199287	AT3G41768	+	345	Yes	Yes	interchromosomal	13	0.070444	1300	-23.6737	2.2e-05	6	0.070444	600	-7.48191	1955	195	-3.99712	700	8
1	28711973	28712473	AT1G76510	+	781	1	28698456	28698956	AT1G76490	+	51	Yes	NA	13517	6	0.070444	600	-7.64097	1	3	0.070444	300	-2.53869	976	70	-1.70932	300	2
1	26158050	26158550	AT1G69560	+	101	1	26153460	26153960	AT1G69550	+	1231	NA	Yes	4590	11	0.070444	1100	-18.8849	0.00215	3	0.070444	300	-2.53798	73	1436	-7.13467	800	-6
2	7422035	7422535	AT2G17060	+	810	2	7417914	7418414	AT2G17055	+	101	Yes	NA	4121	9	0.070444	900	-13.9886	0.218454	5	0.070444	500	-5.67323	800	102	-2.05518	400	4
3	1834993	1835493	AT3G06080	+	45	3	1831063	1831563	AT3G06070	+	605	NA	Yes	3930	7	0.070444	700	-9.75766	1	1	0.070444	100	-0.445282	22	585	-7.95778	600	-2
1	24205507	24206007	AT1G65150	+	937	1	24199512	24200012	AT1G65130	+	85	Yes	NA	5995	8	0.070444	800	-11.7494	1	2	0.070444	200	-1.33091	1080	93	-5.51465	600	4
3	294893	295393	AT3G01820	+	1788	3	285012	285512	AT3G01790	+	69	Yes	NA	9881	10	0.070444	1000	-16.5686	0.019741	2	0.070444	200	-1.33091	1932	90	-8.59835	800	-6
2	10044994	10045494	AT2G23610	+	118	2	10034982	10035482	AT2G23590	+	382	Yes	Yes	10012	7	0.070444	700	-9.52698	1	1	0.070444	100	-0.456531	136	349	-7.50559	600	-2
2	6287581	6288081	AT2G14692	+	991	2	6285512	6286012	AT2G14690	+	76	Yes	NA	2069	11	0.070444	1100	-19.0483	0.001871	7	0.070444	700	-9.61241	847	73	-1.83859	400	6
1	8878522	8879022	AT1G25320	+	1385	1	8864016	8864516	AT1G25280	+	1096	Yes	Yes	14506	8	0.079511	708.779	-11.5079	1	1	0.070444	100	-0.458343	1470	877	-7.44012	608.779	-4
1	23257011	23257511	AT1G62800	+	944	1	23246442	23246942	AT1G62770	+	1425	Yes	Yes	10569	10	0.070461	999.756	-16.0486	0.029971	9	0.070444	900	-13.729	907	1209	-0.606961	99.7563	6
2	9896033	9896533	AT2G23240	+	1226	2	9878011	9878511	AT2G23190	+	42	Yes	NA	18022	6	0.070444	600	-7.68942	1	3	0.070444	300	-2.55024	1154	42	-1.72419	300	2
1	28452472	28452972	AT1G75780	+	63	1	28435014	28435514	AT1G75720	+	955	NA	Yes	17458	7	0.070444	700	-9.64875	1	3	0.070444	300	-2.53714	77	1129	-2.52705	400	2
3	3357380	3357880	AT3G10720	+	1043	3	3339986	3340486	AT3G10690	+	52	Yes	NA	17394	6	0.070444	600	-7.63667	1	1	0.070444	100	-0.452939	1150	51	-5.73888	500	2
1	19904575	19905075	AT1G53350	+	89	1	19896524	19897024	AT1G53330	+	941	NA	Yes	8051	7	0.070444	700	-9.57181	1	2	0.070444	200	-1.33091	81	899	-4.18441	500	2
2	9814416	9814916	AT2G23060	+	627	2	9811570	9812070	AT2G23050	+	122	Yes	NA	2846	8	0.070444	800	-11.6681	1	4	0.070444	400	-3.99221	552	116	-2.23496	400	4
1	10200531	10201031	AT1G29180	+	1499	1	10183895	10184395	AT1G29160	+	804	Yes	Yes	16636	6	0.070444	600	-7.44119	1	3	0.076579	275.967	-2.5231	1456	1017	-2.48147	324.033	2
1	24862973	24863473	AT1G66660	+	976	1	24860429	24860929	AT1G66650	+	330	Yes	Yes	2544	23	0.070444	2300	-53.2835	0	12	0.070444	1200	-21.0795	1032	327	-5.26285	1100	20
3	4903013	4903513	AT3G14580	+	71	3	4892616	4893116	AT3G14570	+	713	NA	Yes	10397	11	0.070444	1100	-19.0957	0.001795	7	0.070444	700	-9.55843	96	810	-1.82207	400	6
3	6289941	6290441	AT3G18320	+	644	3	6282590	6283090	AT3G18300	+	66	Yes	NA	7351	8	0.070444	800	-11.8283	1	3	0.070444	300	-2.53506	615	89	-3.47558	500	4
1	24714032	24714532	AT1G66290	+	1466	1	24694948	24695448	AT1G66250	+	110	Yes	NA	19084	6	0.070444	600	-7.52428	1	0	0.070444	0	1.0056	1322	90	1.0056	600	2
1	5396511	5397011	AT1G15690	+	66	1	5373963	5374463	AT1G15620	+	1192	NA	Yes	22548	6	0.070444	600	-7.59074	1	0	0.070444	0	1.00857	59	1462	1.00857	600	2
1	23345049	23345549	AT1G63005	+	96	1	23337106	23337606	AT1G62990	+	1139	NA	Yes	7943	9	0.070444	900	-14.0044	0.215989	8	0.070444	800	-11.7494	85	1270	-0.590622	100	4
1	7917013	7917513	AT1G22420	+	154	1	7902001	7902501	AT1G22380	+	1742	NA	Yes	15012	8	0.070444	800	-11.6299	1	2	0.070444	200	-1.3309	115	1977	-5.4913	600	4
2	16898034	16898534	AT2G40460	+	317	2	16887578	16888078	AT2G40435	+	907	Yes	Yes	10456	7	0.070444	700	-9.44261	1	5	0.070444	500	-5.6286	346	905	-0.957018	200	2
1	25834530	25835030	AT1G68790	+	203	1	25829152	25829652	AT1G68760	+	1048	Yes	Yes	5378	12	0.070444	1200	-21.1868	0.000234	5	0.070444	500	-5.64027	212	1397	-4.37126	700	8
1	25838457	25838957	AT1G68790	+	1431	1	25830406	25830906	AT1G68765	+	88	Yes	NA	8051	6	0.070444	600	-7.54896	1	0	0.070444	0	1.00843	1711	60	1.00843	600	2
1	27508521	27509021	AT1G73165	+	1377	1	27503454	27503954	AT1G73140	+	237	Yes	NA	5067	7	0.070444	700	-9.45929	1	4	0.070444	400	-3.97616	1486	266	-1.54329	300	2
1	6184520	6185020	AT1G17970	+	31	1	6177940	6178440	AT1G17950	+	1617	NA	Yes	6580	9	0.070444	900	-14.7327	0.111406	1	0.070444	100	-0.440172	16	1537	-13.1741	800	-4
1	10892875	10893375	AT1G30700	+	568	1	10890044	10890544	AT1G30690	+	38	Yes	NA	2831	6	0.070444	600	-7.71885	1	1	0.070444	100	-0.452448	582	47	-5.75034	500	2
1	23506577	23507077	AT1G63390	+	159	1	23497018	23497518	AT1G63350	+	1191	NA	Yes	9559	9	0.070444	900	-13.88	0.235555	8	0.070444	800	-11.6228	162	1449	-0.596773	100	4
2	12968500	12969000	AT2G30432	+	1282	2	12959922	12960422	AT2G30410	+	61	Yes	NA	8578	7	0.070444	700	-9.65752	1	6	0.070444	600	-7.56493	1133	78	-0.578429	100	2
1	24513511	24514011	AT1G65890	+	1196	1	24502006	24502506	AT1G65860	+	152	Yes	NA	11505	9	0.070444	900	-13.8886	0.234122	1	0.070444	100	-0.456361	1235	126	-11.6622	800	-4
1	4280387	4280887	AT1G12570	+	54	1	4273538	4274038	AT1G12540	+	1047	NA	Yes	6849	10	0.070444	1000	-16.7361	0.016965	2	0.070444	200	-1.33092	69	991	-8.68021	800	-6
1	22591993	22592493	AT1G61260	+	57	1	22589450	22589950	AT1G61255	+	351	NA	Yes	2543	6	0.070444	600	-7.61756	1	3	0.070444	300	-2.54659	48	363	-1.71943	300	2
1	3511566	3512066	AT1G10620	+	910	1	3502378	3502878	AT1G10590	+	48	Yes	NA	9188	6	0.070444	600	-7.65499	1	3	0.070444	300	-2.54059	1045	63	-1.71172	300	2
3	2577576	2578076	AT3G08500	+	1312	3	2556527	2557027	AT3G08010	+	107	Yes	NA	21049	7	0.070444	700	-9.54104	1	1	0.070444	100	-0.455358	1364	88	-7.54896	600	-2
2	8249579	8250079	AT2G19040	+	966	2	8246079	8246579	AT2G19020	+	390	Yes	Yes	3500	20	0.070444	2000	-43.7348	0	6	0.070444	600	-7.45663	1009	367	-11.1731	1400	-16
2	16259539	16260039	AT2G38940	+	113	2	16244418	16244918	AT2G38905	+	997	Yes	Yes	15121	7	0.070444	700	-9.53302	1	4	0.070444	400	-4.00522	80	1297	-1.55696	300	2
1	22290058	22290558	AT1G60490	+	63	1	22272980	22273480	AT1G60450	+	1482	NA	Yes	17078	8	0.070444	800	-11.8454	1	2	0.070444	200	-1.33091	87	1560	-5.52316	600	4
1	18249968	18250468	AT1G49330	+	102	1	18237892	18238392	AT1G49310	+	872	NA	Yes	12076	6	0.070444	600	-7.53199	1	4	0.070444	400	-3.99406	109	851	-0.991175	200	2
1	12451928	12452428	AT1G34190	+	755	1	12449405	12449905	AT1G34180	+	439	Yes	Yes	2523	14	0.070444	1400	-26.3033	2e-06	2	0.070444	200	-1.33089	826	371	-15.5416	1200	-10
3	875938	876438	AT3G03620	+	561	3	870415	870915	AT3G03610	+	75	Yes	NA	5523	11	0.070444	1100	-19.0573	0.001857	3	0.070444	300	-2.54378	675	54	-7.26079	800	-6
1	21417462	21417962	AT1G57820	+	1312	1	21366563	21367063	AT1G57690	+	72	Yes	NA	50899	6	0.070444	600	-7.57672	1	0	0.070444	0	1.00743	1265	68	1.00743	600	2
1	18025585	18026085	AT1G48740	+	1299	1	17994572	17995072	AT1G48650	+	65	Yes	NA	31013	6	0.070444	600	-7.59334	1	2	0.070444	200	-1.3309	1363	103	-2.97821	400	2
1	24620494	24620994	AT1G66140	+	106	1	24609998	24610498	AT1G66110	+	1181	NA	Yes	10496	8	0.070444	800	-11.696	1	5	0.070444	500	-5.66699	113	1189	-1.45053	300	4
1	25759585	25760085	AT1G68600	+	319	1	25753348	25753848	AT1G68580	+	1573	Yes	Yes	6237	12	0.070444	1200	-21.0838	0.000257	5	0.070444	500	-5.62424	454	1574	-4.32769	700	8
2	8073623	8074123	AT2G18600	+	1100	2	8072093	8072593	AT2G18590	+	228	Yes	Yes	1530	30	0.070444	3000	-77.496	0	12	0.070444	1200	-21.2016	744	193	-11.4991	1800	-30
1	10132031	10132531	AT1G29030	+	81	1	10126450	10126950	AT1G29025	+	1436	Yes	Yes	5581	15	0.070444	1500	-30.0478	0	4	0.070444	400	-4.0235	56	1348	-10.433	1100	-10
2	7932998	7933498	AT2G18230	+	105	2	7914952	7915452	AT2G18190	+	1287	NA	Yes	18046	9	0.070444	900	-13.9771	0.220169	1	0.070444	100	-0.455999	109	1302	-11.6902	800	-4
3	2940454	2940954	AT3G09570	+	67	3	2938428	2938928	AT3G09560	+	632	NA	Yes	2026	9	0.070444	900	-14.1446	0.194473	1	0.070444	100	-0.455786	101	372	-11.7067	800	-4
1	24606033	24606533	AT1G66100	+	1650	1	24601072	24601572	AT1G66080	+	92	Yes	NA	4961	12	0.070444	1200	-21.5412	0.000172	3	0.070444	300	-2.53602	1633	83	-8.51266	900	-8
1	21936484	21936984	AT1G59700	+	1403	1	21935469	21935969	AT1G59690	+	1668	Yes	Yes	1015	96	0.12258	5516.94	-349.628	0	71	0.120694	4143.99	-237.548	1323	1764	-5.48886	1372.96	136
1	3888601	3889101	AT1G11580	+	569	1	3883531	3884031	AT1G11570	+	1345	Yes	Yes	5070	16	0.070444	1600	-31.7987	0	7	0.070444	700	-9.41871	618	1556	-5.2142	900	12
1	21970498	21970998	AT1G59740	+	95	1	21950944	21951444	AT1G59725	+	1294	Yes	Yes	19554	6	0.070444	600	-7.53983	1	1	0.070444	100	-0.455432	90	1378	-5.68182	500	2
2	7933565	7934065	AT2G18230	+	96	2	7921958	7922458	AT2G18196	+	777	NA	Yes	11607	6	0.070444	600	-7.53864	1	3	0.070444	300	-2.53521	88	898	-1.70496	300	2
1	24578041	24578541	AT1G66020	+	989	1	24560490	24560990	AT1G65980	+	125	Yes	NA	17551	6	0.070444	600	-7.51253	1	4	0.070444	400	-3.98372	1044	165	-0.99114	200	2
3	610606	611106	AT3G02810	+	113	3	604037	604537	AT3G02780	+	562	NA	Yes	6569	6	0.070444	600	-7.52167	1	2	0.070444	200	-1.3309	109	331	-2.97628	400	2
2	3301	3801	AT2G01010	+	685	3	14198775	14199275	AT3G41768	+	345	Yes	Yes	interchromosomal	6	0.070444	600	-7.45844	1	1	0.070444	100	-0.457181	532	195	-5.6429	500	2
2	7672004	7672504	AT2G17650	+	90	2	7669525	7670025	AT2G17640	+	1210	NA	Yes	2479	19	0.070444	1900	-42.1381	0	5	0.070444	500	-5.68182	90	954	-13.1159	1400	-16
1	24578128	24578628	AT1G66020	+	989	1	24565486	24565986	AT1G65985	+	165	Yes	Yes	12642	6	0.070444	600	-7.49181	1	2	0.070444	200	-1.3309	1044	185	-2.96283	400	2
1	24212606	24213106	AT1G65180	+	764	1	24170552	24171052	AT1G65060	+	830	Yes	Yes	42054	7	0.070444	700	-9.41393	1	1	0.070444	100	-0.458276	730	841	-7.4425	600	-2
2	17261968	17262468	AT2G41410	+	147	2	17252433	17252933	AT2G41380	+	1637	NA	Yes	9535	19	0.070444	1900	-41.3843	0	7	0.070444	700	-9.50093	146	1838	-8.34955	1200	-16
1	4286046	4286546	AT1G12600	+	53	1	4275128	4275628	AT1G12550	+	1113	NA	Yes	10918	7	0.070444	700	-9.69959	1	6	0.070444	600	-7.58823	67	1309	-0.576438	100	2
2	18874379	18874879	AT2G45860	+	178	2	18870392	18870892	AT2G45840	+	329	NA	Yes	3987	6	0.070444	600	-7.4871	1	1	0.070444	100	-0.457339	218	400	-5.63943	500	2
1	12375876	12376376	AT1G34040	+	71	1	12371482	12371982	AT1G34030	+	512	NA	Yes	4394	9	0.070444	900	-14.1181	0.198625	7	0.070444	700	-9.56977	90	553	-0.913283	200	4
2	18748449	18748949	AT2G45490	+	50	2	18731040	18731540	AT2G45440	+	1837	NA	Yes	17409	7	0.070444	700	-9.71906	1	5	0.070444	500	-5.70427	69	1546	-0.957226	200	2
1	20271151	20271651	AT1G54300	+	228	1	20270064	20270564	AT1G54290	+	68	Yes	NA	1087	8	0.070444	800	-11.8178	1	5	0.070444	500	-5.69205	192	79	-1.45712	300	4
1	24204565	24205065	AT1G65150	+	279	1	24201466	24201966	AT1G65140	+	176	Yes	NA	3099	8	0.070444	800	-11.6119	1	2	0.070444	200	-1.3309	206	200	-5.45018	600	4
2	8329590	8330090	AT2G19190	+	1509	2	8319987	8320487	AT2G19170	+	71	Yes	NA	9603	8	0.070444	800	-11.8033	1	3	0.070444	300	-2.53972	1544	66	-3.50511	500	4
1	6855998	6856498	AT1G19835	+	33	1	6852578	6853078	AT1G19830	+	1282	NA	Yes	3420	9	0.070444	900	-14.662	0.119498	1	0.070444	100	-0.433858	12	1316	-13.9821	800	-4
1	6499	6999	AT1G01020	+	38	1	4062	4562	AT1G01010	+	628	NA	Yes	2437	15	0.070444	1500	-31.6754	0	7	0.070444	700	-10.0871	25	728	-5.80898	800	12
1	1451424	1451924	AT1G05060	+	58	1	1441378	1441878	AT1G05030	+	776	NA	Yes	10046	6	0.070444	600	-7.61415	1	3	0.070444	300	-2.55171	40	1020	-1.72612	300	2
1	8878459	8878959	AT1G25320	+	1385	1	8868058	8868558	AT1G25290	+	96	Yes	NA	10401	9	0.070444	900	-14.0044	0.215989	2	0.070444	200	-1.33091	1470	96	-6.9853	700	-4
3	6360026	6360526	AT3G18518	+	42	3	6355699	6356199	AT3G18510	+	962	NA	Yes	4327	7	0.070444	700	-9.78556	1	1	0.070444	100	-0.448887	30	927	-7.80345	600	-2
1	23256975	23257475	AT1G62800	+	944	1	23250988	23251488	AT1G62780	+	81	Yes	NA	5987	9	0.070444	900	-14.0638	0.207032	8	0.070444	800	-11.716	907	97	-0.592252	100	4
1	11360983	11361483	AT1G31730	+	117	1	11349635	11350135	AT1G31710	+	1031	Yes	Yes	11348	7	0.070444	700	-9.52815	1	3	0.070444	300	-2.53172	119	1186	-2.50916	400	2
1	19072077	19072577	AT1G51440	+	53	1	19065907	19066407	AT1G51420	+	1719	NA	Yes	6170	9	0.070444	900	-14.2712	0.174311	3	0.070444	300	-2.5572	34	1757	-4.79828	600	4
1	3895484	3895984	AT1G11592	+	131	1	3882519	3883019	AT1G11560	+	986	NA	Yes	12965	6	0.070444	600	-7.5086	1	3	0.070444	300	-2.53048	136	939	-1.69911	300	2
1	10200495	10200995	AT1G29180	+	1499	1	10193520	10194020	AT1G29170	+	964	Yes	Yes	6975	9	0.075691	837.616	-13.7271	0.26453	3	0.070444	300	-2.52331	1456	857	-4.44361	537.616	4
1	3908516	3909016	AT1G11610	+	77	1	3882979	3883479	AT1G11570	+	864	NA	Yes	25537	6	0.070444	600	-7.56677	1	0	0.070444	0	1.00857	59	847	1.00857	600	2
1	11117907	11118407	AT1G31140	+	1209	1	11116069	11116569	AT1G31130	+	43	Yes	NA	1838	17	0.070444	1700	-37.751	0	8	0.070444	800	-12.5177	905	24	-6.73968	900	14
2	9001492	9001992	AT2G20930	+	97	2	8986439	8986939	AT2G20880	+	1889	NA	Yes	15053	8	0.070444	800	-11.716	1	0	0	0	0	0	0	0	800	4
2	16897945	16898445	AT2G40460	+	317	2	16889454	16889954	AT2G40440	+	1508	Yes	Yes	8491	12	0.070444	1200	-21.085	0.000256	4	0.070444	400	-3.97332	346	1450	-5.9298	800	8
1	7038551	7039051	AT1G20330	+	59	1	7034558	7035058	AT1G20320	+	1639	NA	Yes	3993	11	0.070444	1100	-19.2449	0.001564	0	0	0	0	0	0	0	1100	6
1	24713090	24713590	AT1G66290	+	485	1	24697620	24698120	AT1G66260	+	998	Yes	Yes	15470	9	0.070444	900	-13.7565	0.259104	2	0.070444	200	-1.33089	332	976	-6.86317	700	4
2	8699863	8700363	AT2G20160	+	319	2	8698446	8698946	AT2G20150	+	213	Yes	Yes	1417	8	0.070444	800	-11.5901	1	3	0.070444	300	-2.52968	280	150	-3.44231	500	4
2	13437468	13437968	AT2G31560	+	684	2	13434460	13434960	AT2G31550	+	1203	Yes	Yes	3008	30	0.070444	3000	-76.229	0	11	0.070444	1100	-18.4706	835	1215	-12.4639	1900	-28
1	10200512	10201012	AT1G29180	+	1499	1	10199025	10199525	AT1G29179	+	962	Yes	Yes	1487	64	0.075534	5968.76	-208.231	0	50	0.077633	4537	-150.619	1456	1031	-3.87114	1431.77	80
3	6541465	6541965	AT3G18957	+	138	3	6537501	6538001	AT3G18950	+	1693	NA	Yes	3964	15	0.070444	1500	-29.5253	0	11	0.070444	1100	-18.736	146	1779	-1.55447	400	10
1	27508663	27509163	AT1G73165	+	1377	1	27504000	27504500	AT1G73150	+	142	Yes	Yes	4663	7	0.070444	700	-9.50401	1	2	0.070444	200	-1.3309	1486	163	-4.14141	500	2
2	12970007	12970507	AT2G30432	+	255	2	12961527	12962027	AT2G30420	+	911	Yes	Yes	8480	9	0.070444	900	-13.8104	0.248509	3	0.070444	300	-2.52694	232	1146	-4.47866	600	4
2	3267	3767	AT2G01010	+	685	3	14199877	14200377	AT3G41979	+	544	Yes	Yes	interchromosomal	7	0.070444	700	-9.42212	1	5	0.070444	500	-5.62219	532	590	-0.957014	200	2
3	6005020	6005520	AT3G17550	+	37	3	6000119	6000619	AT3G17520	+	899	NA	Yes	4901	8	0.070444	800	-12.1204	1	3	0.070444	300	-2.5525	39	896	-3.58934	500	4
2	9330895	9331395	AT2G21890	+	1139	2	9318484	9318984	AT2G21860	+	129	Yes	NA	12411	8	0.070444	800	-11.6581	1	4	0.070444	400	-3.98649	1088	145	-2.22798	400	4
2	12968474	12968974	AT2G30432	+	1282	2	12964422	12964922	AT2G30424	+	89	Yes	Yes	4052	12	0.070444	1200	-21.5638	0.000169	2	0.070444	200	-1.33091	1133	82	-12.1747	1000	-8
2	16257565	16258065	AT2G38940	+	347	2	16246909	16247409	AT2G38910	+	614	Yes	Yes	10656	6	0.070444	600	-7.45827	1	2	0.070444	200	-1.33089	337	602	-2.95428	400	2
2	8249956	8250456	AT2G19040	+	739	2	8247997	8248497	AT2G19030	+	107	Yes	Yes	1959	10	0.070444	1000	-16.3627	0.023341	4	0.070444	400	-4.01847	704	61	-4.04611	600	6
2	15292424	15292924	AT2G36440	+	899	2	15279039	15279539	AT2G36410	+	65	Yes	NA	13385	6	0.070444	600	-7.59334	1	4	0.070444	400	-4.00576	925	79	-0.991232	200	2
1	3222993	3223493	AT1G09910	+	604	1	3218968	3219468	AT1G09900	+	23	Yes	NA	4025	6	0.070444	600	-7.93186	1	1	0.070444	100	-0.440172	553	16	-6.06436	500	2
1	6269505	6270005	AT1G18220	+	30	1	6267569	6268069	AT1G18210	+	663	Yes	Yes	1936	7	0.070444	700	-9.95904	1	2	0.070444	200	-1.33144	15	790	-4.6503	500	2
2	16470410	16470910	AT2G39445	+	77	2	16458598	16459098	AT2G39415	+	1077	NA	Yes	11812	6	0.070444	600	-7.56677	1	3	0.070444	300	-2.53552	86	1273	-1.70535	300	2
2	19400063	19400563	AT2G47250	+	66	2	19387604	19388104	AT2G47230	+	1178	NA	Yes	12459	8	0.070444	800	-11.8283	1	5	0.070444	500	-5.69313	78	1354	-1.45741	300	4
1	19130438	19130938	AT1G51590	+	63	1	19124099	19124599	AT1G51570	+	483	NA	Yes	6339	6	0.070444	600	-7.59879	1	2	0.070444	200	-1.33093	59	504	-3.00493	400	2
2	12624980	12625480	AT2G29450	+	194	2	12621002	12621502	AT2G29440	+	1421	NA	Yes	3978	19	0.070444	1900	-41.1089	0	6	0.070444	600	-7.49142	166	1679	-10.2114	1300	-16
2	17811465	17811965	AT2G42810	+	113	2	17809346	17809846	AT2G42800	+	857	NA	Yes	2119	21	0.070444	2100	-48.1422	0	9	0.070444	900	-13.9947	99	890	-7.52614	1200	-18
2	8084394	8084894	AT2G18640	+	716	2	8081489	8081989	AT2G18630	+	69	Yes	NA	2905	8	0.070444	800	-11.8128	1	4	0.070444	400	-4.02699	830	53	-2.27891	400	4
1	24619575	24620075	AT1G66140	+	99	1	24613032	24613532	AT1G66120	+	1075	NA	Yes	6543	11	0.070444	1100	-18.8948	0.002133	4	0.070444	400	-4.0037	83	983	-5.02221	700	6
1	25760025	25760525	AT1G68600	+	905	1	25758103	25758603	AT1G68590	+	81	Yes	NA	1922	16	0.070444	1600	-33.0167	0	7	0.070444	700	-9.59003	1066	81	-5.58758	900	12
2	14204551	14205051	AT2G33540	+	123	2	14194460	14194960	AT2G33510	+	722	NA	Yes	10091	6	0.070444	600	-7.51393	1	1	0.070444	100	-0.456449	131	525	-5.65908	500	2
2	18309051	18309551	AT2G44310	+	505	2	18305506	18306006	AT2G44290	+	1891	NA	Yes	3545	20	0.070444	2000	-43.6313	0	11	0.070444	1100	-18.4925	597	1920	-4.089	900	16
1	24606036	24606536	AT1G66100	+	1650	1	24604505	24605005	AT1G66090	+	113	Yes	Yes	1531	25	0.070444	2500	-61.6259	0	6	0.070444	600	-7.61086	1633	59	-20.4934	1900	-24
1	5273497	5273997	AT1G15320	+	136	1	5270913	5271413	AT1G15310	+	891	NA	Yes	2584	22	0.070444	2200	-51.071	0	14	0.070444	1400	-26.864	111	797	-3.30011	800	20
3	1452608	1453108	AT3G05160	+	100	3	1440914	1441414	AT3G05150	+	642	NA	Yes	11694	7	0.070444	700	-9.55165	1	2	0.070444	200	-1.3309	135	710	-4.15009	500	2
2	15883007	15883507	AT2G37950	+	83	2	15877409	15877909	AT2G37940	+	1220	NA	Yes	5598	15	0.070444	1500	-30.0164	0	9	0.070444	900	-14.0735	79	1295	-2.78318	600	10
3	609011	609511	AT3G02810	+	65	3	605195	605695	AT3G02790	+	1191	NA	Yes	3816	11	0.070444	1100	-19.1629	0.001688	2	0.070444	200	-1.33093	58	1540	-10.5132	900	-6
1	24577069	24577569	AT1G66020	+	340	1	24572977	24573477	AT1G65990	+	963	Yes	Yes	4092	12	0.070444	1200	-21.0728	0.000259	5	0.070444	500	-5.63353	273	887	-4.35281	700	8
1	24284922	24285422	AT1G65370	+	664	1	24262521	24263021	AT1G65320	+	145	Yes	NA	22401	7	0.070444	700	-9.50168	1	1	0.070444	100	-0.456865	618	161	-7.49341	600	-2
1	27127068	27127568	AT1G72100	+	114	1	27122499	27122999	AT1G72080	+	634	NA	Yes	4569	7	0.070444	700	-9.53177	1	2	0.070444	200	-1.3309	135	588	-4.15009	500	2
2	9417448	9417948	AT2G22140	+	622	2	9411404	9411904	AT2G22125	+	69	Yes	NA	6044	7	0.070444	700	-9.62562	1	2	0.070444	200	-1.33093	371	56	-4.22402	500	2
2	13819568	13820068	AT2G32550	+	1412	2	13810992	13811492	AT2G32530	+	91	Yes	Yes	8576	9	0.070444	900	-14.0219	0.213335	3	0.070444	300	-2.54829	1775	45	-4.69872	600	4
1	20286081	20286581	AT1G54340	+	139	1	20280531	20281031	AT1G54330	+	1276	Yes	Yes	5550	12	0.070444	1200	-21.3197	0.000209	1	0.070444	100	-0.456531	136	1255	-18.7603	1100	-8
2	18875014	18875514	AT2G45860	+	116	2	18873093	18873593	AT2G45850	+	1333	NA	Yes	1921	27	0.070444	2700	-68.587	0	13	0.070444	1300	-24.0268	126	1472	-7.70214	1400	-26
1	8326022	8326522	AT1G23450	+	59	1	8315418	8315918	AT1G23410	+	652	NA	Yes	10604	9	0.070444	900	-14.2091	0.184215	2	0.070444	200	-1.33094	51	776	-7.14723	700	-4
1	223453	223953	AT1G01610	+	807	1	219535	220035	AT1G01600	+	123	Yes	NA	3918	19	0.070444	1900	-41.6111	0	8	0.070444	800	-11.6696	896	121	-6.87674	1100	16
1	12463440	12463940	AT1G34220	+	41	1	12451476	12451976	AT1G34190	+	1769	NA	Yes	11964	7	0.070444	700	-9.79584	1	0	0	0	0	0	0	0	700	2
2	8329478	8329978	AT2G19190	+	1509	2	8324971	8325471	AT2G19180	+	99	Yes	NA	4507	25	0.070444	2500	-62.0422	0	15	0.070444	1500	-30.1159	1544	77	-4.62192	1000	24
2	194945	195445	AT2G01440	+	43	2	188591	189091	AT2G01430	+	515	NA	Yes	6354	10	0.070444	1000	-16.9408	0.013938	2	0.070444	200	-1.33096	44	344	-8.89031	800	-6
1	5620466	5620966	AT1G16460	+	54	1	5616043	5616543	AT1G16440	+	859	NA	Yes	4423	9	0.070444	900	-14.2598	0.176132	7	0.070444	700	-9.62918	68	968	-0.913446	200	4
1	23256995	23257495	AT1G62800	+	944	1	23252040	23252540	AT1G62790	+	72	Yes	NA	4955	11	0.070444	1100	-19.0857	0.001811	5	0.070444	500	-5.68801	907	83	-3.59573	600	6
1	19012503	19013003	AT1G51290	+	1845	1	18987967	18988467	AT1G51210	+	631	Yes	Yes	24536	6	0.070444	600	-7.44474	1	5	0.070444	500	-5.62012	1701	644	-0.579478	100	2
2	11810372	11810872	AT2G27690	+	965	2	11802492	11802992	AT2G27670	+	77	Yes	NA	7880	9	0.070444	900	-14.0837	0.203941	5	0.070444	500	-5.67323	880	102	-2.05518	400	4
1	11361515	11362015	AT1G31730	+	80	1	11356589	11357089	AT1G31720	+	903	Yes	Yes	4926	6	0.070444	600	-7.56141	1	1	0.070444	100	-0.454979	79	715	-5.69205	500	2
1	3895876	3896376	AT1G11592	+	173	1	3883564	3884064	AT1G11570	+	1345	NA	Yes	12312	10	0.070444	1000	-16.225	0.025985	4	0.070444	400	-3.98633	146	1556	-3.92528	600	6
1	24947082	24947582	AT1G66880	+	598	1	24938025	24938525	AT1G66852	+	555	Yes	Yes	9057	8	0.070444	800	-11.527	1	5	0.070444	500	-5.62263	513	663	-1.43928	300	4
3	5572001	5572501	AT3G16410	+	1129	3	5567412	5567912	AT3G16400	+	452	Yes	Yes	4589	10	0.070444	1000	-16.0911	0.02899	3	0.070444	300	-2.52488	1116	395	-5.6129	700	6
1	3907465	3907965	AT1G11610	+	97	1	3888963	3889463	AT1G11580	+	1785	NA	Yes	18502	6	0.070444	600	-7.53747	1	2	0.070444	200	-1.33091	86	1643	-2.98518	400	2
2	9001511	9002011	AT2G20930	+	97	2	8988016	8988516	AT2G20890	+	1201	NA	Yes	13495	16	0.070444	1600	-32.7694	0	9	0.070444	900	-13.935	123	1282	-3.33867	700	12
1	24713976	24714476	AT1G66290	+	1466	1	24701515	24702015	AT1G66270	+	540	Yes	Yes	12461	12	0.070444	1200	-21.0111	0.000274	2	0.070444	200	-1.33089	1322	411	-11.7888	1000	-8
1	23891567	23892067	AT1G64380	+	824	1	23887036	23887536	AT1G64355	+	170	Yes	NA	4531	12	0.070444	1200	-21.2425	0.000223	9	0.070444	900	-13.8733	1013	165	-1.23578	300	8
1	25835914	25836414	AT1G68790	+	175	1	25833839	25834339	AT1G68780	+	497	Yes	Yes	2075	9	0.070444	900	-13.863	0.238599	1	0.070444	100	-0.456732	150	513	-11.6338	800	-4
2	13291036	13291536	AT2G31190	+	100	2	13277901	13278401	AT2G31160	+	1276	NA	Yes	13135	6	0.070444	600	-7.53411	1	3	0.070444	300	-2.53155	121	1052	-1.70043	300	2
1	12877511	12878011	AT1G35180	+	269	1	12871974	12872474	AT1G35170	+	586	NA	Yes	5537	8	0.070444	800	-11.5687	1	3	0.070444	300	-2.52557	319	495	-3.41744	500	4
2	702497	702997	AT2G02580	+	861	2	696940	697440	AT2G02560	+	58	Yes	NA	5557	7	0.070444	700	-9.67187	1	4	0.070444	400	-4.00865	982	74	-1.55862	300	2
1	27508899	27509399	AT1G73165	+	1001	1	27507493	27507993	AT1G73160	+	259	Yes	NA	1406	40	0.070444	4000	-114.324	0	32	0.070444	3200	-84.5813	1105	238	-2.20439	800	44
1	11004438	11004938	AT1G30920	+	1648	1	10994834	10995334	AT1G30890	+	62	Yes	NA	9604	8	0.070444	800	-11.8515	1	3	0.070444	300	-2.5442	1612	53	-3.53407	500	4
2	12968884	12969384	AT2G30432	+	73	2	12967952	12968452	AT2G30430	+	410	Yes	Yes	932	7	0.070444	700	-9.61241	1	3	0.070444	300	-2.5442	53	414	-2.55094	400	2
3	1119494	1119994	AT3G04240	+	58	3	1107620	1108120	AT3G04210	+	1356	NA	Yes	11874	7	0.070444	700	-9.67187	1	4	0.070444	400	-4.02699	53	1640	-1.56764	300	2
1	24513518	24514018	AT1G65890	+	1196	1	24508987	24509487	AT1G65880	+	131	Yes	NA	4531	16	0.070444	1600	-32.4543	0	5	0.070444	500	-5.69205	1235	79	-9.05503	1100	-12
2	9330921	9331421	AT2G21890	+	1139	2	9322519	9323019	AT2G21870	+	1397	Yes	Yes	8402	12	0.083346	1014.24	-20.9565	0.000287	6	0.084063	502.794	-7.43783	1088	1494	-3.923	511.449	8
2	9844038	9844538	AT2G23130	+	529	2	9839107	9839607	AT2G23100	+	63	Yes	NA	4931	7	0.070444	700	-9.64875	1	4	0.070444	400	-4.02242	565	57	-1.56537	300	2
3	2577836	2578336	AT3G08500	+	1407	3	2565025	2565525	AT3G08030	+	89	Yes	NA	12811	8	0.070444	800	-11.7372	1	2	0.070444	200	-1.33095	1424	46	-5.64545	600	4
1	23337169	23337669	AT1G62990	+	1139	1	23323421	23323921	AT1G62970	+	103	Yes	NA	13748	8	0.070444	800	-11.7023	1	5	0.070444	500	-5.6559	1270	140	-1.44767	300	4
2	267322	267822	AT2G01590	+	311	2	264962	265462	AT2G01580	+	109	Yes	NA	2360	6	0.070444	600	-7.52518	1	2	0.070444	200	-1.33091	226	101	-2.9789	400	2
2	7265434	7265934	AT2G16730	+	643	2	7248083	7248583	AT2G16710	+	44	Yes	NA	17351	6	0.070444	600	-7.67684	1	1	0.070444	100	-0.453546	688	57	-5.72482	500	2
3	3318951	3319451	AT3G10610	+	71	3	3314926	3315426	AT3G10600	+	971	NA	Yes	4025	9	0.070444	900	-14.1181	0.198625	3	0.070444	300	-2.53734	76	952	-4.58278	600	4
1	8482540	8483040	AT1G23970	+	618	1	8480482	8480982	AT1G23965	+	1260	Yes	Yes	2058	54	0.070444	5400	-167.602	0	39	0.070444	3900	-108.933	544	1337	-4.17786	1500	64
2	15292392	15292892	AT2G36440	+	899	2	15288505	15289005	AT2G36420	+	76	Yes	NA	3887	13	0.070444	1300	-24.4128	1.1e-05	9	0.070444	900	-14.0182	925	92	-1.67804	400	8
1	5577964	5578464	AT1G16310	+	782	1	5576381	5576881	AT1G16300	+	130	Yes	Yes	1583	18	0.070444	1800	-38.4473	0	4	0.070444	400	-3.99973	635	92	-14.6409	1400	-14
1	10206990	10207490	AT1G29210	+	76	1	10200585	10201085	AT1G29180	+	1499	NA	Yes	6405	9	0.070444	900	-14.089	0.203107	4	0.070444	400	-4.02699	53	1456	-3.11857	500	4
2	11769040	11769540	AT2G27540	+	142	2	11764107	11764607	AT2G27530	+	1246	NA	Yes	4933	10	0.070444	1000	-16.2733	0.025009	4	0.070444	400	-3.98587	149	1387	-3.92363	600	6
1	27499491	27499991	AT1G73130	+	1362	1	27493552	27494052	AT1G73100	+	105	Yes	NA	5939	6	0.070444	600	-7.52895	1	2	0.070444	200	-1.33091	1437	100	-2.97926	400	2
1	3066898	3067398	AT1G09500	+	574	1	3059095	3059595	AT1G09480	+	144	Yes	NA	7803	6	0.070444	600	-7.50122	1	2	0.070444	200	-1.3309	649	123	-2.97252	400	2
2	12492408	12492908	AT2G29080	+	1118	2	12479496	12479996	AT2G29050	+	405	Yes	Yes	12912	7	0.070444	700	-9.43192	1	1	0.070444	100	-0.458075	1132	485	-7.4497	600	-2
2	17669483	17669983	AT2G42440	+	46	2	17657945	17658445	AT2G42410	+	1295	NA	Yes	11538	7	0.070444	700	-9.74922	1	5	0.070444	500	-5.71025	65	1538	-0.957254	200	2
1	11446041	11446541	AT1G31880	+	426	1	11442983	11443483	AT1G31875	+	79	Yes	NA	3058	7	0.070444	700	-9.59518	1	4	0.070444	400	-4.00013	447	91	-1.55452	300	2
1	21419973	21420473	AT1G57830	+	143	1	21417871	21418371	AT1G57820	+	641	Yes	Yes	2102	9	0.070444	900	-13.901	0.232122	3	0.070444	300	-2.53018	141	668	-4.51051	600	4
1	24620480	24620980	AT1G66140	+	106	1	24614900	24615400	AT1G66130	+	1020	NA	Yes	5580	7	0.070444	700	-9.54247	1	3	0.070444	300	-2.53224	113	960	-2.51087	400	2
1	5988392	5988892	AT1G17450	+	37	1	5977550	5978050	AT1G17420	+	1900	NA	Yes	10842	6	0.070444	600	-7.72728	1	0	0.070444	0	1.03262	16	1950	1.03262	600	2
1	4447520	4448020	AT1G13040	+	1598	1	4438954	4439454	AT1G13000	+	80	Yes	NA	8566	6	0.070444	600	-7.56141	1	5	0.070444	500	-5.68349	1543	88	-0.571542	100	2
1	27143016	27143516	AT1G72140	+	53	1	27132033	27132533	AT1G72120	+	1574	NA	Yes	10983	6	0.070444	600	-7.63255	1	3	0.070444	300	-2.5477	46	1566	-1.72087	300	2
1	1831501	1832001	AT1G06050	+	117	1	1826649	1827149	AT1G06030	+	1040	NA	Yes	4852	7	0.070444	700	-9.52815	1	3	0.070444	300	-2.53243	111	1041	-2.51149	400	2
1	4299067	4299567	AT1G12630	+	1857	1	4261543	4262043	AT1G12490	+	1307	Yes	Yes	37524	6	0.127131	332.464	-7.43623	1	0	0	0	0	0	0	0	332.464	2
1	27914896	27915396	AT1G74230	+	1201	1	27904586	27905086	AT1G74190	+	49	Yes	NA	10310	6	0.070444	600	-7.65012	1	4	0.070444	400	-4.02462	1322	55	-0.991364	200	2
2	9344008	9344508	AT2G21920	+	347	2	9321567	9322067	AT2G21870	+	953	Yes	Yes	22441	6	0.070444	600	-7.45827	1	2	0.070444	200	-1.33089	364	778	-2.95352	400	2
1	27142946	27143446	AT1G72140	+	53	1	27134064	27134564	AT1G72125	+	1733	NA	Yes	8882	9	0.070444	900	-14.2712	0.174311	6	0.070444	600	-7.66541	46	1701	-1.4031	300	4
1	7465500	7466000	AT1G21320	+	1639	1	7453385	7453885	AT1G21310	+	41	Yes	NA	12115	6	0.070444	600	-7.69621	1	3	0.070444	300	-2.58737	1795	19	-1.77632	300	2
1	20378977	20379477	AT1G54560	+	1394	1	20364569	20365069	AT1G54520	+	238	Yes	Yes	14408	9	0.070444	900	-13.8186	0.246895	3	0.070444	300	-2.52679	1335	239	-4.47724	600	4
2	1574992	1575492	AT2G04520	+	40	2	1564582	1565082	AT2G04495	+	1407	NA	Yes	10410	10	0.070444	1000	-17.0185	0.012916	2	0.070444	200	-1.33099	36	1343	-9.02745	800	-6
1	20363962	20364462	AT1G54520	+	1211	1	20354966	20355466	AT1G54490	+	53	Yes	NA	8996	8	0.070444	800	-11.9171	1	1	0.070444	100	-0.452703	1312	49	-9.72611	700	-4
2	9282064	9282564	AT2G21740	+	36	2	9279846	9280346	AT2G21730	+	679	NA	Yes	2218	10	0.070444	1000	-17.1447	0.011402	1	0.070444	100	-0.437475	14	675	-16.4814	900	-6
1	4147955	4148455	AT1G12230	+	116	1	4128453	4128953	AT1G12170	+	1314	NA	Yes	19502	6	0.070444	600	-7.5192	1	4	0.070444	400	-3.98932	129	1472	-0.991157	200	2
1	1690862	1691362	AT1G05650	+	976	1	1685013	1685513	AT1G05630	+	46	Yes	NA	5849	7	0.070444	700	-9.74922	1	1	0.070444	100	-0.444636	1161	21	-7.98651	600	-2
1	7399975	7400475	AT1G21130	+	1468	1	7374621	7375121	AT1G21065	+	85	Yes	NA	25354	7	0.070444	700	-9.58047	1	4	0.070444	400	-3.99785	1667	97	-1.55343	300	2
1	26884575	26885075	AT1G71330	+	87	1	26872541	26873041	AT1G71290	+	1334	NA	Yes	12034	10	0.070444	1000	-16.4476	0.021838	9	0.070444	900	-14.0011	97	1351	-0.596375	100	6
2	132971	133471	AT2G01250	+	47	2	115414	115914	AT2G01190	+	1526	NA	Yes	17557	7	0.070444	700	-9.74117	1	3	0.070444	300	-2.53821	72	1516	-2.53064	400	2
1	1756839	1757339	AT1G05830	+	34	1	1731014	1731514	AT1G05785	+	1850	NA	Yes	25825	6	0.070444	600	-7.75577	1	0	0.070444	0	1.01765	29	1750	1.01765	600	2
1	19012499	19012999	AT1G51290	+	1845	1	18989550	18990050	AT1G51220	+	194	Yes	Yes	22949	6	0.070444	600	-7.48219	1	1	0.070444	100	-0.456745	1701	151	-5.65253	500	2
1	27555026	27555526	AT1G73280	+	1055	1	27545972	27546472	AT1G73250	+	99	Yes	NA	9054	8	0.070444	800	-11.7112	1	7	0.070444	700	-9.53302	1162	113	-0.588658	100	4
1	16963537	16964037	AT1G44890	+	1307	1	16937430	16937930	AT1G44830	+	38	Yes	NA	26107	6	0.070444	600	-7.71885	1	1	0.070444	100	-0.443136	1407	19	-5.98326	500	2
1	24947084	24947584	AT1G66880	+	598	1	24943972	24944472	AT1G66860	+	223	Yes	Yes	3112	14	0.070444	1400	-26.4826	1e-06	7	0.070444	700	-9.46014	513	234	-3.68762	700	10
1	18927945	18928445	AT1G51070	+	88	1	18921040	18921540	AT1G51040	+	1510	NA	Yes	6905	10	0.070444	1000	-16.4424	0.021934	3	0.070444	300	-2.53359	100	1404	-5.73961	700	6
1	3136027	3136527	AT1G09690	+	84	1	3133017	3133517	AT1G09665	+	560	NA	Yes	3010	14	0.070444	1400	-27.1185	1e-06	5	0.070444	500	-5.74729	48	642	-6.93756	900	-10
1	23890935	23891435	AT1G64380	+	908	1	23887383	23887883	AT1G64360	+	330	Yes	Yes	3552	12	0.070444	1200	-21.0779	0.000258	3	0.070444	300	-2.52503	1079	376	-8.21612	900	-8
1	11457009	11457509	AT1G31910	+	74	1	11450547	11451047	AT1G31885	+	930	NA	Yes	6462	7	0.070444	700	-9.60933	1	5	0.070444	500	-5.70427	69	947	-0.957226	200	2
1	16963545	16964045	AT1G44890	+	1307	1	16940960	16941460	AT1G44835	+	29	Yes	NA	22585	9	0.070444	900	-14.8146	0.102688	6	0.070444	600	-7.93186	1407	23	-1.45871	300	4
1	7930034	7930534	AT1G22460	+	113	1	7923088	7923588	AT1G22440	+	981	NA	Yes	6946	8	0.070444	800	-11.6828	1	2	0.070444	200	-1.33091	102	1123	-5.50384	600	4
1	29201850	29202350	AT1G77690	+	379	1	29195499	29195999	AT1G77680	+	647	Yes	Yes	6351	6	0.070444	600	-7.45572	1	2	0.070444	200	-1.33089	408	665	-2.95249	400	2
1	24714528	24715028	AT1G66290	+	602	1	24709469	24709969	AT1G66280	+	1112	Yes	Yes	5059	12	0.070444	1200	-21.0004	0.000276	4	0.070444	400	-3.97121	446	1095	-5.91486	800	8
1	12188054	12188554	AT1G33607	+	33	1	12180859	12181359	AT1G33600	+	1342	NA	Yes	7195	6	0.070444	600	-7.76652	1	4	0.070444	400	-4.16326	18	1585	-0.993891	200	2
2	13292985	13293485	AT2G31190	+	69	2	13284607	13285107	AT2G31170	+	1097	NA	Yes	8378	7	0.070444	700	-9.62562	1	2	0.070444	200	-1.33095	46	1089	-4.25278	500	2
2	16504990	16505490	AT2G39560	+	187	2	16492859	16493359	AT2G39510	+	846	NA	Yes	12131	6	0.070444	600	-7.48424	1	2	0.070444	200	-1.3309	192	811	-2.96214	400	2
1	22682883	22683383	AT1G61480	+	351	1	22677031	22677531	AT1G61460	+	416	Yes	NA	5852	8	0.070444	800	-11.5497	1	2	0.070444	200	-1.33089	271	382	-5.43585	600	4
3	2219466	2219966	AT3G07020	+	98	3	2206594	2207094	AT3G06990	+	1565	NA	Yes	12872	10	0.070444	1000	-16.3964	0.022734	7	0.070444	700	-9.5356	111	1571	-1.32221	300	6
1	7908396	7908896	AT1G22403	+	472	1	7906482	7906982	AT1G22400	+	1235	Yes	Yes	1914	16	0.070444	1600	-31.8376	0	5	0.070444	500	-5.62329	487	1061	-8.49179	1100	-12
1	7516970	7517470	AT1G21470	+	711	1	7511989	7512489	AT1G21460	+	65	Yes	NA	4981	11	0.070444	1100	-19.1629	0.001688	2	0.070444	200	-1.33093	646	53	-10.5687	900	-6
2	13119480	13119980	AT2G30790	+	90	2	13111839	13112339	AT2G30770	+	1168	NA	Yes	7641	13	0.070444	1300	-24.2589	1.3e-05	10	0.070444	1000	-16.3078	126	1286	-1.20946	300	8
2	8340934	8341434	AT2G19220	+	44	2	8329095	8329595	AT2G19190	+	773	NA	Yes	11839	7	0.070444	700	-9.76651	1	3	0.070444	300	-2.54464	52	637	-2.55245	400	2
2	9331926	9332426	AT2G21890	+	733	2	9326088	9326588	AT2G21880	+	1681	Yes	Yes	5838	17	0.070444	1700	-34.6138	0	9	0.070444	900	-13.7401	671	1785	-3.85114	800	12
2	10757494	10757994	AT2G25260	+	732	2	10740012	10740512	AT2G25210	+	64	Yes	NA	17482	6	0.070444	600	-7.59602	1	5	0.070444	500	-5.7057	791	68	-0.568748	100	2
3	4049015	4049515	AT3G12740	+	483	3	4041430	4041930	AT3G12710	+	872	NA	Yes	7585	10	0.070444	1000	-16.0859	0.029112	4	0.070444	400	-3.96895	646	744	-3.86347	600	6
1	149527	150027	AT1G01390	+	1207	1	142121	142621	AT1G01360	+	62	Yes	NA	7406	11	0.070444	1100	-19.2018	0.001629	4	0.070444	400	-4.01345	1517	67	-5.07706	700	6
3	2577572	2578072	AT3G08500	+	1312	3	2566045	2566545	AT3G08040	+	63	Yes	NA	11527	7	0.070444	700	-9.64875	1	2	0.070444	200	-1.33093	1364	60	-4.21534	500	2
1	10303115	10303615	AT1G29430	+	1368	1	10281023	10281523	AT1G29370	+	61	Yes	NA	22092	6	0.070444	600	-7.60462	1	0	0.070444	0	1.01056	1645	48	1.01056	600	2
2	7264481	7264981	AT2G16730	+	143	2	7255496	7255996	AT2G16720	+	842	Yes	Yes	8985	7	0.070444	700	-9.50322	1	6	0.070444	600	-7.52703	107	1024	-0.581659	100	2
1	3534489	3534989	AT1G10660	+	63	1	3530618	3531118	AT1G10657	+	494	NA	Yes	3871	10	0.070444	1000	-16.6254	0.018778	3	0.070444	300	-2.54223	58	533	-5.87178	700	6
2	12684146	12684646	AT2G29670	+	833	2	12671421	12671921	AT2G29640	+	200	Yes	NA	12725	7	0.070444	700	-9.47158	1	1	0.070444	100	-0.457572	1032	264	-7.46777	600	-2
1	27498576	27499076	AT1G73130	+	390	1	27495463	27495963	AT1G73110	+	677	Yes	Yes	3113	11	0.070444	1100	-18.5336	0.002889	5	0.070444	500	-5.62502	430	689	-3.47429	600	6
2	18535031	18535531	AT2G44940	+	57	2	18524513	18525013	AT2G44920	+	1442	NA	Yes	10518	7	0.070444	700	-9.677	1	4	0.070444	400	-4.01345	67	1527	-1.56096	300	2
2	18070985	18071485	AT2G43535	+	1067	2	18063418	18063918	AT2G43500	+	56	Yes	Yes	7567	6	0.070444	600	-7.6211	1	1	0.070444	100	-0.453358	1282	55	-5.72915	500	2
2	12489526	12490026	AT2G29080	+	137	2	12482471	12482971	AT2G29060	+	1336	Yes	Yes	7055	6	0.070444	600	-7.50502	1	1	0.070444	100	-0.455923	106	1016	-5.67081	500	2
1	3066989	3067489	AT1G09500	+	574	1	3064459	3064959	AT1G09490	+	1188	Yes	Yes	2530	33	0.070444	3300	-86.9074	0	20	0.070444	2000	-43.5541	649	1269	-4.93376	1300	34
2	15068416	15068916	AT2G35890	+	1212	2	15049076	15049576	AT2G35810	+	1565	Yes	Yes	19340	7	0.099353	496.32	-9.40646	1	4	0.115104	244.802	-3.96633	1353	1645	-2.20396	251.518	2
1	22072914	22073414	AT1G59960	+	1243	1	22060897	22061397	AT1G59930	+	52	Yes	NA	12017	6	0.070444	600	-7.63667	1	1	0.070444	100	-0.45153	1226	41	-5.77196	500	2
3	128335	128835	AT3G01340	+	134	3	114899	115399	AT3G01326	+	853	NA	Yes	13436	7	0.070444	700	-9.51073	1	3	0.070444	300	-2.53074	132	1005	-2.50599	400	2
2	18384499	18384999	AT2G44530	+	54	2	18364620	18365120	AT2G44490	+	1681	NA	Yes	19879	7	0.070444	700	-9.69361	1	4	0.070444	400	-4.04044	44	1694	-1.57444	300	2
2	12492438	12492938	AT2G29080	+	1118	2	12485535	12486035	AT2G29065	+	163	Yes	NA	6903	10	0.070444	1000	-16.2385	0.025706	6	0.070444	600	-7.50389	1132	139	-1.90945	400	6
2	14204483	14204983	AT2G33540	+	123	2	14199986	14200486	AT2G33530	+	1549	NA	Yes	4497	17	0.070444	1700	-35.4798	0	10	0.070444	1000	-16.2961	131	1803	-3.16978	700	12
1	29748027	29748527	AT1G79080	+	74	1	29742456	29742956	AT1G79060	+	1073	NA	Yes	5571	11	0.070444	1100	-19.0665	0.001842	7	0.070444	700	-9.60344	76	1132	-1.83581	400	6
2	11405473	11405973	AT2G26770	+	50	2	11393535	11394035	AT2G26740	+	1541	NA	Yes	11938	7	0.070444	700	-9.71906	1	3	0.070444	300	-2.5426	57	1840	-2.54546	400	2
1	10013943	10014443	AT1G28480	+	1623	1	9994002	9994502	AT1G28430	+	795	Yes	Yes	19941	7	0.070444	700	-9.41314	1	6	0.070444	600	-7.44198	1684	758	-0.588861	100	2
1	2032390	2032890	AT1G06640	+	67	1	2025469	2025969	AT1G06620	+	860	NA	Yes	6921	9	0.070444	900	-14.1446	0.194473	3	0.070444	300	-2.54223	58	974	-4.63378	600	4
1	27516082	27516582	AT1G73177	+	37	1	27514492	27514992	AT1G73170	+	1301	NA	Yes	1590	8	0.070444	800	-12.1204	1	4	0.070444	400	-4.09734	26	1329	-2.3769	400	4
1	1918487	1918987	AT1G06270	+	1502	1	1903484	1903984	AT1G06220	+	39	Yes	NA	15003	6	0.070444	600	-7.71089	1	2	0.070444	200	-1.33097	1490	40	-3.03597	400	2
1	1078973	1079473	AT1G04140	+	34	1	1070397	1070897	AT1G04120	+	1314	NA	Yes	8576	9	0.070444	900	-14.6302	0.123327	2	0.070444	200	-1.33101	32	1516	-7.3711	700	-4
1	10635012	10635512	AT1G30220	+	590	1	10629987	10630487	AT1G30210	+	1058	Yes	Yes	5025	14	0.070444	1400	-26.2566	2e-06	5	0.070444	500	-5.62251	518	1286	-6.26351	900	10
2	11144888	11145388	AT2G26180	+	38	2	11138482	11138982	AT2G26160	+	1303	NA	Yes	6406	9	0.070444	900	-14.5216	0.1373	1	0.070444	100	-0.445282	22	1124	-12.6283	800	-4
2	6699513	6700013	AT2G15370	+	58	2	6689051	6689551	AT2G15350	+	1532	NA	Yes	10462	9	0.070444	900	-14.2185	0.182739	2	0.070444	200	-1.33101	32	1440	-7.3711	700	-4
2	9343541	9344041	AT2G21920	+	207	2	9326093	9326593	AT2G21880	+	1681	Yes	Yes	17448	11	0.070444	1100	-18.6398	0.002636	6	0.070444	600	-7.48847	174	1785	-2.52197	500	6
1	20377437	20377937	AT1G54560	+	160	1	20366475	20366975	AT1G54530	+	860	Yes	Yes	10962	6	0.070444	600	-7.49382	1	1	0.070444	100	-0.456224	119	825	-5.66408	500	2
1	7399999	7400499	AT1G21130	+	1468	1	7377934	7378434	AT1G21070	+	78	Yes	NA	22065	6	0.070444	600	-7.56493	1	0	0.070444	0	1.00743	1667	68	1.00743	600	2
1	7530645	7531145	AT1G21500	+	606	1	7523968	7524468	AT1G21475	+	127	Yes	NA	6677	10	0.070444	1000	-16.3054	0.024383	7	0.070444	700	-9.49662	682	152	-1.31761	300	6
1	4150551	4151051	AT1G12230	+	70	1	4130886	4131386	AT1G12180	+	1012	NA	Yes	19665	6	0.070444	600	-7.58112	1	0	0.070444	0	1.0056	90	1183	1.0056	600	2
1	1691996	1692496	AT1G05650	+	56	1	1689388	1689888	AT1G05640	+	478	Yes	Yes	2608	6	0.070444	600	-7.6211	1	1	0.070444	100	-0.449205	31	413	-5.82799	500	2
1	22432439	22432939	AT1G60930	+	71	1	22429615	22430115	AT1G60920	+	677	Yes	Yes	2824	7	0.070444	700	-9.61882	1	2	0.070444	200	-1.33092	73	746	-4.194	500	2
2	7313064	7313564	AT2G16880	+	57	2	7311501	7312001	AT2G16870	+	1353	NA	Yes	1563	20	0.070444	2000	-46.7544	0	6	0.070444	600	-7.77799	32	1105	-14.0536	1400	-18
3	2556477	2556977	AT3G08010	+	107	3	2540977	2541477	AT3G07970	+	1734	NA	Yes	15500	8	0.070444	800	-11.694	1	1	0.070444	100	-0.455358	88	1779	-9.5739	700	-4
1	12294893	12295393	AT1G33860	+	226	1	12283431	12283931	AT1G33840	+	1335	Yes	Yes	11462	6	0.070444	600	-7.47448	1	2	0.070444	200	-1.3309	164	933	-2.96528	400	2
2	7952513	7953013	AT2G18300	+	70	2	7939989	7940489	AT2G18250	+	1706	NA	Yes	12524	8	0.070444	800	-11.808	1	3	0.070444	300	-2.53844	71	1856	-3.49697	500	4
1	24950529	24951029	AT1G66880	+	117	1	24945529	24946029	AT1G66870	+	980	Yes	Yes	5000	9	0.070444	900	-13.9476	0.224823	1	0.070444	100	-0.455786	101	1012	-11.7067	800	-4
1	25891068	25891568	AT1G68872	+	47	1	25870030	25870530	AT1G68825	+	1223	NA	Yes	21038	6	0.070444	600	-7.66008	1	4	0.070444	400	-4.01059	71	1432	-0.991261	200	2
3	6445060	6445560	AT3G18720	+	1029	3	6425987	6426487	AT3G18670	+	1403	Yes	Yes	19073	8	0.07562	745.243	-11.5091	1	2	0.074451	189.236	-1.33089	1021	1410	-5.40662	556.007	4
2	13515025	13515525	AT2G31780	+	142	2	13508395	13508895	AT2G31760	+	298	NA	Yes	6630	6	0.070444	600	-7.50227	1	3	0.070444	300	-2.53117	126	235	-1.69995	300	2
3	2848899	2849399	AT3G09270	+	367	3	2833988	2834488	AT3G09230	+	1191	Yes	Yes	14911	11	0.070444	1100	-18.541	0.002871	4	0.070444	400	-3.97259	375	1284	-4.85596	700	6
3	2262036	2262536	AT3G07140	+	25	3	2257504	2258004	AT3G07130	+	688	NA	Yes	4532	8	0.070444	800	-12.4702	0.927732	3	0.070444	300	-2.56078	31	782	-3.64669	500	4
1	17890143	17890643	AT1G48410	+	48	1	17883661	17884161	AT1G48400	+	581	Yes	Yes	6482	6	0.070444	600	-7.65499	1	3	0.070444	300	-2.54607	49	738	-1.71876	300	2
2	6712972	6713472	AT2G15400	+	59	2	6689077	6689577	AT2G15350	+	1532	NA	Yes	23895	10	0.070444	1000	-16.6701	0.01803	5	0.070444	500	-5.73382	53	1440	-2.83925	500	6
2	13293446	13293946	AT2G31190	+	68	2	13288008	13288508	AT2G31180	+	1282	NA	Yes	5438	6	0.070444	600	-7.58578	1	2	0.070444	200	-1.33098	37	1410	-3.04401	400	2
1	26759490	26759990	AT1G70970	+	59	1	26749041	26749541	AT1G70944	+	1618	NA	Yes	10449	7	0.070444	700	-9.66691	1	3	0.070444	300	-2.53637	81	1776	-2.52451	400	2
2	16505450	16505950	AT2G39560	+	162	2	16497140	16497640	AT2G39520	+	1143	NA	Yes	8310	7	0.070444	700	-9.49016	1	5	0.070444	500	-5.64798	169	1365	-0.957045	200	2
1	29614412	29614912	AT1G78750	+	1344	1	29600380	29600880	AT1G78700	+	103	Yes	NA	14032	7	0.070444	700	-9.54692	1	4	0.070444	400	-3.99378	1306	110	-1.5515	300	2
1	22681026	22681526	AT1G61480	+	190	1	22678961	22679461	AT1G61470	+	684	Yes	Yes	2065	18	0.070444	1800	-38.0853	0	8	0.070444	800	-11.6272	157	567	-5.85963	1000	14
3	4226937	4227437	AT3G13140	+	1121	3	4221976	4222476	AT3G13120	+	74	Yes	NA	4961	11	0.070444	1100	-19.0665	0.001842	7	0.070444	700	-9.60933	1158	74	-1.83764	400	6
3	6064457	6064957	AT3G17730	+	1141	3	6045498	6045998	AT3G17690	+	930	Yes	Yes	18959	8	0.070444	800	-11.5114	1	3	0.070444	300	-2.52313	1362	991	-3.40281	500	4
3	1933079	1933579	AT3G06370	+	1169	3	1917032	1917532	AT3G06330	+	34	Yes	NA	16047	6	0.070444	600	-7.75577	1	1	0.070444	100	-0.449504	1291	32	-5.8207	500	2
1	26279002	26279502	AT1G69810	+	1065	1	26259969	26260469	AT1G69780	+	82	Yes	NA	19033	6	0.070444	600	-7.55806	1	1	0.070444	100	-0.45587	1166	104	-5.672	500	2
1	990553	991053	AT1G03890	+	97	1	983346	983846	AT1G03870	+	1049	NA	Yes	7207	9	0.070444	900	-14.0011	0.216462	5	0.070444	500	-5.67797	95	1322	-2.05835	400	4
2	11013041	11013541	AT2G25810	+	63	2	10993082	10993582	AT2G25770	+	1888	NA	Yes	19959	9	0.070444	900	-14.1747	0.189735	0	0	0	0	0	0	0	900	4
2	6359472	6359972	AT2G14820	+	102	2	6358086	6358586	AT2G14810	+	777	Yes	NA	1386	28	0.070444	2800	-72.6859	0	10	0.070444	1000	-16.6823	58	741	-14.7353	1800	-28
3	4049980	4050480	AT3G12740	+	122	3	4044514	4045014	AT3G12720	+	1654	NA	Yes	5466	15	0.070444	1500	-29.6202	0	7	0.070444	700	-9.51254	132	1608	-4.54615	800	10
2	11818436	11818936	AT2G27720	+	79	2	11810287	11810787	AT2G27690	+	965	NA	Yes	8149	7	0.070444	700	-9.59518	1	1	0.070444	100	-0.455571	94	880	-7.54105	600	-2
1	23000485	23000985	AT1G62262	+	84	1	22998997	22999497	AT1G62260	+	1763	Yes	Yes	1488	27	0.070444	2700	-69.9193	0	14	0.070444	1400	-27.8788	50	1976	-7.85792	1300	-26
2	12683051	12683551	AT2G29670	+	130	2	12675465	12675965	AT2G29650	+	1523	Yes	Yes	7586	8	0.070444	800	-11.6567	1	1	0.070444	100	-0.455815	102	1796	-9.54847	700	-4
1	17492448	17492948	AT1G47600	+	277	1	17485019	17485519	AT1G47578	+	365	Yes	NA	7429	6	0.070444	600	-7.46591	1	2	0.070444	200	-1.33089	305	493	-2.95537	400	2
1	6331387	6331887	AT1G18400	+	359	1	6329984	6330484	AT1G18390	+	46	Yes	Yes	1403	8	0.070444	800	-11.9873	1	1	0.070444	100	-0.451702	400	42	-9.78556	700	-4
2	8963970	8964470	AT2G20820	+	60	2	8955406	8955906	AT2G20800	+	1660	NA	Yes	8564	9	0.070444	900	-14.2	0.185666	7	0.070444	700	-9.61241	73	1645	-0.913395	200	4
2	17767468	17767968	AT2G42660	+	1438	2	17750040	17750540	AT2G42610	+	71	Yes	NA	17428	6	0.070444	600	-7.57889	1	4	0.070444	400	-4.01669	1541	63	-0.991303	200	2
2	12684127	12684627	AT2G29670	+	833	2	12676912	12677412	AT2G29654	+	248	Yes	NA	7215	7	0.070444	700	-9.45635	1	4	0.070444	400	-3.97418	1032	317	-1.54238	300	2
3	2858175	2858675	AT3G09300	+	1041	3	2834955	2835455	AT3G09230	+	240	Yes	Yes	23220	6	0.070444	600	-7.47176	1	3	0.070444	300	-2.52746	1300	210	-1.69543	300	2
2	12492412	12492912	AT2G29080	+	1118	2	12489079	12489579	AT2G29070	+	110	Yes	NA	3333	20	0.070444	2000	-44.957	0	13	0.070444	1300	-24.0816	1132	115	-2.84428	700	16
2	15068043	15068543	AT2G35890	+	1091	2	15050970	15051470	AT2G35820	+	901	Yes	Yes	17073	6	0.070444	600	-7.4398	1	3	0.070444	300	-2.52327	1075	878	-1.69038	300	2
1	22707075	22707575	AT1G61550	+	86	1	22689408	22689908	AT1G61500	+	1681	NA	Yes	17667	6	0.070444	600	-7.55185	1	3	0.070444	300	-2.53619	82	1987	-1.70619	300	2
1	26705866	26706366	AT1G70820	+	885	1	26702550	26703050	AT1G70800	+	79	Yes	NA	3316	10	0.070444	1000	-16.4942	0.021017	4	0.070444	400	-4.00054	1200	90	-3.97763	600	6
1	435618	436118	AT1G02230	+	1354	1	422005	422505	AT1G02205	+	56	Yes	NA	13613	7	0.070444	700	-9.68233	1	4	0.070444	400	-4.02578	1373	54	-1.56704	300	2
2	10399918	10400418	AT2G24490	+	1366	2	10385982	10386482	AT2G24430	+	95	Yes	NA	13936	6	0.070444	600	-7.53983	1	2	0.070444	200	-1.3309	1512	110	-2.97598	400	2
1	4447561	4448061	AT1G13040	+	1598	1	4443500	4444000	AT1G13020	+	72	Yes	NA	4061	16	0.070444	1600	-33.2088	0	5	0.070444	500	-5.72277	1543	58	-9.33365	1100	-12
1	26451454	26451954	AT1G70230	+	133	1	26447036	26447536	AT1G70220	+	791	NA	Yes	4418	14	0.070444	1400	-26.7362	1e-06	4	0.070444	400	-3.99785	97	698	-8.61877	1000	-10
1	1918506	1919006	AT1G06270	+	1502	1	1908393	1908893	AT1G06230	+	37	Yes	NA	10113	8	0.070444	800	-12.1204	1	3	0.070444	300	-2.58067	1490	21	-3.79463	500	4
1	24284984	24285484	AT1G65370	+	664	1	24276478	24276978	AT1G65350	+	1223	Yes	Yes	8506	13	0.070444	1300	-23.5792	2.4e-05	5	0.070444	500	-5.62054	618	943	-5.24867	800	8
2	10328573	10329073	AT2G24270	+	69	2	10317343	10317843	AT2G24255	+	901	NA	Yes	11230	7	0.070444	700	-9.62562	1	2	0.070444	200	-1.33093	57	957	-4.22173	500	2
2	9344051	9344551	AT2G21920	+	347	2	9330911	9331411	AT2G21890	+	1139	Yes	Yes	13140	11	0.070444	1100	-18.5483	0.002853	2	0.070444	200	-1.33089	364	1088	-10.056	900	-6
2	13897587	13898087	AT2G32770	+	108	2	13887545	13888045	AT2G32740	+	1120	NA	Yes	10042	6	0.070444	600	-7.52609	1	0	0.070444	0	1.00457	110	1183	1.00457	600	2
1	24285913	24286413	AT1G65370	+	517	1	24277456	24277956	AT1G65352	+	558	Yes	Yes	8457	7	0.070444	700	-9.42361	1	2	0.070444	200	-1.33089	553	573	-4.11243	500	2
1	20373071	20373571	AT1G54560	+	109	1	20367880	20368380	AT1G54540	+	1012	Yes	Yes	5191	7	0.070444	700	-9.53827	1	1	0.070444	100	-0.454674	73	948	-7.57462	600	-2
1	25450538	25451038	AT1G67870	+	69	1	25444982	25445482	AT1G67860	+	546	NA	Yes	5556	7	0.070444	700	-9.62562	1	4	0.070444	400	-4.03866	45	499	-1.57353	300	2
1	7399597	7400097	AT1G21130	+	1211	1	7381527	7382027	AT1G21080	+	96	Yes	NA	18070	7	0.070444	700	-9.55843	1	0	0.070444	0	1.00572	1445	88	1.00572	700	2
2	18078583	18079083	AT2G43580	+	267	2	18074923	18075423	AT2G43560	+	115	Yes	NA	3660	6	0.070444	600	-7.52001	1	0	0.070444	0	1.0092	163	55	1.0092	600	2
2	10995488	10995988	AT2G25780	+	584	2	10993443	10993943	AT2G25770	+	567	Yes	Yes	2045	21	0.070444	2100	-46.6741	0	10	0.070444	1000	-16.0885	638	467	-5.77514	1100	18
1	4149452	4149952	AT1G12230	+	49	1	4133026	4133526	AT1G12190	+	1736	NA	Yes	16426	6	0.070444	600	-7.65012	1	2	0.070444	200	-1.33094	49	1660	-3.01808	400	2
3	4099975	4100475	AT3G12890	+	738	3	4094557	4095057	AT3G12870	+	992	Yes	Yes	5418	13	0.070444	1300	-23.569	2.4e-05	7	0.070444	700	-9.41867	619	980	-2.95029	600	8
3	4774509	4775009	AT3G14310	+	788	3	4746041	4746541	AT3G14250	+	1327	Yes	Yes	28468	6	0.070444	600	-7.44146	1	1	0.070444	100	-0.458346	884	1130	-5.61746	500	2
1	6997427	6997927	AT1G20180	+	170	1	6982006	6982506	AT1G20132	+	1761	NA	Yes	15421	6	0.070444	600	-7.48991	1	2	0.070444	200	-1.3309	199	1594	-2.96149	400	2
1	22008964	22009464	AT1G59810	+	389	1	22005012	22005512	AT1G59800	+	470	Yes	Yes	3952	11	0.070444	1100	-18.5339	0.002889	2	0.070444	200	-1.33089	423	408	-10.0473	900	-6
3	2848501	2849001	AT3G09270	+	970	3	2836490	2836990	AT3G09240	+	198	Yes	NA	12011	7	0.070444	700	-9.47238	1	2	0.070444	200	-1.3309	1037	162	-4.14167	500	2
2	12322963	12323463	AT2G28710	+	1881	2	12303059	12303559	AT2G28680	+	55	Yes	NA	19904	7	0.070444	700	-9.68786	1	5	0.070444	500	-5.73888	1912	51	-0.957416	200	2
2	16504426	16504926	AT2G39560	+	164	2	16498340	16498840	AT2G39530	+	1821	NA	Yes	6086	13	0.070444	1300	-23.8958	1.8e-05	0	0	0	0	0	0	0	1300	8
2	7829429	7829929	AT2G18000	+	1651	2	7828017	7828517	AT2G17990	+	223	Yes	Yes	1412	19	0.070444	1900	-40.9988	0	5	0.070444	500	-5.64914	1614	164	-12.6428	1400	-16
1	24398566	24399066	AT1G65620	+	1279	1	24363897	24364397	AT1G65540	+	115	Yes	NA	34669	7	0.070444	700	-9.53054	1	1	0.070444	100	-0.455949	1407	107	-7.52703	600	-2
1	29614402	29614902	AT1G78750	+	1344	1	29602913	29603413	AT1G78710	+	152	Yes	NA	11489	6	0.070444	600	-7.49732	1	1	0.070444	100	-0.456607	1306	141	-5.65557	500	2
2	14800607	14801107	AT2G35110	+	52	2	14787104	14787604	AT2G35075	+	1257	NA	Yes	13503	6	0.070444	600	-7.63667	1	1	0.070444	100	-0.451351	40	1030	-5.77623	500	2
1	21184423	21184923	AT1G56540	+	280	1	21159919	21160419	AT1G56500	+	1821	Yes	Yes	24504	6	0.070444	600	-7.4655	1	1	0.070444	100	-0.45762	276	1982	-5.63327	500	2
1	27872989	27873489	AT1G74120	+	1632	1	27868044	27868544	AT1G74110	+	70	Yes	NA	4945	17	0.070444	1700	-36.3407	0	8	0.070444	800	-11.823	1907	67	-5.33978	900	14
1	20171479	20171979	AT1G54040	+	92	1	20156110	20156610	AT1G54000	+	1563	Yes	Yes	15369	6	0.070444	600	-7.54357	1	4	0.070444	400	-4.01757	62	1769	-0.991309	200	2
1	4806986	4807486	AT1G14030	+	622	1	4797526	4798026	AT1G14000	+	80	Yes	NA	9460	6	0.070444	600	-7.56141	1	5	0.070444	500	-5.67261	649	103	-0.572907	100	2
2	13633001	13633501	AT2G32030	+	647	2	13631464	13631964	AT2G32020	+	214	Yes	NA	1537	18	0.070444	1800	-37.9993	0	13	0.070444	1300	-23.8153	605	202	-1.84987	500	14
1	26279040	26279540	AT1G69810	+	1065	1	26268887	26269387	AT1G69790	+	106	Yes	Yes	10153	6	0.070444	600	-7.52798	1	2	0.070444	200	-1.3309	1166	113	-2.97511	400	2
1	21702471	21702971	AT1G58410	+	154	1	21693019	21693519	AT1G58390	+	652	Yes	Yes	9452	6	0.070444	600	-7.49641	1	1	0.070444	100	-0.457074	182	604	-5.64526	500	2
1	19755536	19756036	AT1G53023	+	799	1	19743068	19743568	AT1G52990	+	822	Yes	Yes	12468	7	0.070444	700	-9.41304	1	1	0.070444	100	-0.458234	775	660	-7.44401	600	-2
3	3158475	3158975	AT3G10200	+	38	3	3155414	3155914	AT3G10190	+	1015	NA	Yes	3061	9	0.070444	900	-14.5216	0.1373	2	0.070444	200	-1.33127	18	1252	-7.92419	700	-4
1	10303073	10303573	AT1G29430	+	1368	1	10287492	10287992	AT1G29390	+	1538	Yes	Yes	15581	16	0.110206	1022.72	-31.6889	0	9	0.134926	469.885	-13.7155	1645	1586	-5.51646	552.839	12
1	1550549	1551049	AT1G05310	+	101	1	1530059	1530559	AT1G05260	+	1797	NA	Yes	20490	8	0.070444	800	-11.7067	1	2	0.070444	200	-1.33091	100	2006	-5.50607	600	4
1	2350978	2351478	AT1G07630	+	89	1	2343578	2344078	AT1G07615	+	620	NA	Yes	7400	7	0.070444	700	-9.57181	1	6	0.070444	600	-7.55185	86	814	-0.579546	100	2
1	26278926	26279426	AT1G69810	+	1065	1	26273540	26274040	AT1G69797	+	94	Yes	NA	5386	6	0.070444	600	-7.54105	1	3	0.070444	300	-2.53132	1166	124	-1.70014	300	2
3	4761535	4762035	AT3G14280	+	93	3	4746582	4747082	AT3G14250	+	763	NA	Yes	14953	6	0.070444	600	-7.5423	1	5	0.070444	500	-5.6587	132	724	-0.574651	100	2
3	825972	826472	AT3G03470	+	1015	3	817430	817930	AT3G03440	+	34	Yes	NA	8542	6	0.070444	600	-7.75577	1	4	0.070444	400	-4.10936	1201	24	-0.992574	200	2
1	10302518	10303018	AT1G29430	+	819	1	10288993	10289493	AT1G29395	+	196	Yes	NA	13525	6	0.070444	600	-7.48164	1	1	0.070444	100	-0.457211	991	199	-5.64224	500	2
1	20834065	20834565	AT1G55730	+	1187	1	20802950	20803450	AT1G55670	+	1213	Yes	Yes	31115	7	0.075418	653.834	-9.40673	1	1	0.106272	66.2865	-0.458467	1472	1396	-9.40673	587.547	-2
2	13326090	13326590	AT2G31260	+	688	2	13303976	13304476	AT2G31220	+	94	Yes	NA	22114	6	0.070444	600	-7.54105	1	2	0.070444	200	-1.33091	481	95	-2.98117	400	2
2	18070954	18071454	AT2G43535	+	1067	2	18068945	18069445	AT2G43520	+	1123	Yes	Yes	2009	52	0.070444	5200	-158.558	0	32	0.080024	2816.91	-82.9165	1282	1207	-10.4512	2383.09	-62
1	18913354	18913854	AT1G51020	+	1086	1	18890512	18891012	AT1G50960	+	936	Yes	Yes	22842	6	0.070444	600	-7.43937	1	3	0.070444	300	-2.52318	1092	949	-1.69027	300	2
1	24962589	24963089	AT1G66910	+	701	1	24958467	24958967	AT1G66890	+	73	Yes	NA	4122	7	0.070444	700	-9.61241	1	1	0.070444	100	-0.453546	800	57	-7.61756	600	-2
1	4670072	4670572	AT1G13630	+	64	1	4658568	4659068	AT1G13605	+	766	NA	Yes	11504	6	0.070444	600	-7.59602	1	2	0.070444	200	-1.33092	70	694	-2.99497	400	2
1	22072513	22073013	AT1G59960	+	987	1	22067560	22068060	AT1G59950	+	73	Yes	Yes	4953	6	0.070444	600	-7.57462	1	1	0.070444	100	-0.453454	1134	56	-5.72695	500	2
1	8661993	8662493	AT1G24440	+	70	1	8656565	8657065	AT1G24420	+	792	NA	Yes	5428	10	0.070444	1000	-16.5602	0.019884	4	0.070444	400	-4.00993	72	644	-4.01312	600	6
1	19772990	19773490	AT1G53050	+	55	1	19758924	19759424	AT1G53025	+	1725	NA	Yes	14066	10	0.070444	1000	-16.7218	0.017191	5	0.070444	500	-5.69424	77	1793	-2.78786	500	6
2	18323932	18324432	AT2G44380	+	64	2	18305424	18305924	AT2G44290	+	1891	NA	Yes	18508	7	0.070444	700	-9.64458	1	2	0.070444	200	-1.33095	47	1920	-4.24932	500	2
1	26706428	26706928	AT1G70820	+	662	1	26704575	26705075	AT1G70810	+	166	Yes	NA	1853	12	0.070444	1200	-21.2508	0.000221	3	0.070444	300	-2.53215	758	114	-8.40555	900	-8
1	12933045	12933545	AT1G35250	+	1080	1	12927925	12928425	AT1G35240	+	66	Yes	NA	5120	18	0.070444	1800	-39.6442	0	7	0.070444	700	-9.68233	1133	56	-7.9855	1100	-14
1	20438985	20439485	AT1G54780	+	263	1	20422611	20423111	AT1G54720	+	802	Yes	Yes	16374	6	0.070444	600	-7.46793	1	2	0.070444	200	-1.33089	292	905	-2.95588	400	2
1	11937594	11938094	AT1G32940	+	54	1	11925963	11926463	AT1G32910	+	491	NA	Yes	11631	7	0.070444	700	-9.69361	1	1	0.070444	100	-0.453156	53	479	-7.63255	600	-2
1	4448411	4448911	AT1G13040	+	755	1	4444546	4445046	AT1G13030	+	155	Yes	NA	3865	12	0.070444	1200	-21.2759	0.000217	5	0.070444	500	-5.65116	661	156	-4.40144	700	8
1	5841112	5841612	AT1G17080	+	51	1	5829458	5829958	AT1G17050	+	733	NA	Yes	11654	7	0.070444	700	-9.7123	1	3	0.070444	300	-2.54	65	878	-2.53666	400	2
1	1918467	1918967	AT1G06270	+	1502	1	1912058	1912558	AT1G06240	+	65	Yes	NA	6409	23	0.070444	2300	-56.6704	0	14	0.070444	1400	-27.5306	1490	61	-4.26122	900	22
1	23535043	23535543	AT1G63460	+	136	1	23527608	23528108	AT1G63440	+	1829	NA	Yes	7435	11	0.070444	1100	-18.7603	0.002382	10	0.070444	1000	-16.3153	123	1812	-0.602565	100	6
1	19360461	19360961	AT1G52060	+	579	1	19351451	19351951	AT1G52040	+	102	Yes	NA	9010	6	0.070444	600	-7.53199	1	3	0.070444	300	-2.53568	501	85	-1.70555	300	2
1	464565	465065	AT1G02335	+	81	1	459974	460474	AT1G02310	+	713	NA	Yes	4591	8	0.070444	800	-11.7628	1	3	0.070444	300	-2.53674	79	585	-3.48619	500	4
1	24284933	24285433	AT1G65370	+	664	1	24281485	24281985	AT1G65360	+	1366	Yes	Yes	3448	31	0.070444	3100	-79.7273	0	13	0.070444	1300	-23.5868	618	1379	-10.4164	1800	-30
1	21319526	21320026	AT1G57565	+	81	1	21312423	21312923	AT1G57550	+	1212	NA	Yes	7103	15	0.070444	1500	-30.0478	0	14	0.070444	1400	-27.1861	79	1457	-0.605049	100	10
1	20372477	20372977	AT1G54560	+	180	1	20370490	20370990	AT1G54550	+	662	Yes	Yes	1987	16	0.070444	1600	-32.217	0	5	0.070444	500	-5.64844	167	626	-8.6889	1100	-12
1	155521	156021	AT1G01420	+	173	1	147448	147948	AT1G01380	+	874	NA	Yes	8073	15	0.070444	1500	-29.381	0	8	0.070444	800	-11.5985	197	1080	-3.46841	700	10
1	7399562	7400062	AT1G21130	+	1211	1	7386050	7386550	AT1G21090	+	135	Yes	NA	13512	6	0.070444	600	-7.50617	1	1	0.070444	100	-0.456139	1445	115	-5.66599	500	2
2	1154405	1154905	AT2G03790	+	42	2	1148496	1148996	AT2G03750	+	1130	NA	Yes	5909	7	0.070444	700	-9.78556	1	2	0.070444	200	-1.33095	45	1503	-4.25641	500	2
2	9849512	9850012	AT2G23142	+	47	2	9844476	9844976	AT2G23130	+	954	NA	Yes	5036	6	0.070444	600	-7.66008	1	5	0.070444	500	-5.8207	32	1253	-0.554169	100	2
1	1536989	1537489	AT1G05280	+	91	1	1529653	1530153	AT1G05260	+	835	NA	Yes	7336	10	0.070444	1000	-16.4275	0.022185	2	0.070444	200	-1.33091	85	799	-8.61398	800	-6
3	4099948	4100448	AT3G12890	+	738	3	4095992	4096492	AT3G12880	+	391	Yes	Yes	3956	17	0.070444	1700	-34.7611	0	7	0.070444	700	-9.46409	619	221	-6.21168	1000	12
2	7893471	7893971	AT2G18150	+	1840	2	7845991	7846491	AT2G18050	+	125	Yes	NA	47480	6	0.070444	600	-7.51253	1	0	0.070444	0	1.00409	1816	123	1.00409	600	2
1	19154199	19154699	AT1G51660	+	898	1	19153473	19153973	AT1G51650	+	127	Yes	NA	726	21	0.070444	2100	-47.9296	0	11	0.070444	1100	-18.8754	886	103	-5.12221	1000	18
3	2555969	2556469	AT3G08010	+	155	3	2553503	2554003	AT3G07990	+	1162	NA	Yes	2466	37	0.070444	3700	-104.754	0	17	0.070444	1700	-35.3909	134	1319	-11.7285	2000	-40
1	11311510	11312010	AT1G31580	+	699	1	11293591	11294091	AT1G31540	+	1725	Yes	Yes	17919	8	0.070444	800	-11.519	1	7	0.089779	549.246	-9.41151	868	2000	-1.65244	250.754	4
3	5497524	5498024	AT3G16220	+	1571	3	5484579	5485079	AT3G16180	+	72	Yes	NA	12945	8	0.070444	800	-11.7987	1	5	0.070444	500	-5.72079	1873	59	-1.4649	300	4
1	19012518	19013018	AT1G51290	+	1845	1	19001635	19002135	AT1G51250	+	770	Yes	Yes	10883	10	0.074413	946.66	-16.0574	0.029766	6	0.089377	472.903	-7.4385	1701	1016	-3.16694	473.757	6
1	2901123	2901623	AT1G09020	+	55	1	2891560	2892060	AT1G09000	+	461	Yes	Yes	9563	6	0.070444	600	-7.62477	1	1	0.070444	100	-0.453156	53	414	-5.73382	500	2
1	8025949	8026449	AT1G22680	+	56	1	8014959	8015459	AT1G22650	+	1298	NA	Yes	10990	6	0.070444	600	-7.6211	1	3	0.070444	300	-2.5409	62	1427	-1.71212	300	2
2	15123472	15123972	AT2G36020	+	270	2	15107369	15107869	AT2G35960	+	1743	Yes	Yes	16103	7	0.070444	700	-9.4512	1	0	0	0	0	0	0	0	700	2
3	2848475	2848975	AT3G09270	+	970	3	2839550	2840050	AT3G09250	+	125	Yes	NA	8925	11	0.070444	1100	-18.7917	0.002321	10	0.070444	1000	-16.2659	1037	146	-0.604165	100	6
2	10517339	10517839	AT2G24710	+	39	2	10515126	10515626	AT2G24700	+	414	NA	Yes	2213	6	0.070444	600	-7.71089	1	2	0.070444	200	-1.3311	24	419	-3.10515	400	2
1	8714486	8714986	AT1G24590	+	78	1	8712844	8713344	AT1G24577	+	891	NA	Yes	1642	22	0.070444	2200	-52.4404	0	11	0.070444	1100	-19.23	60	1023	-6.42515	1100	20
1	24477002	24477502	AT1G65810	+	204	1	24473580	24474080	AT1G65800	+	785	NA	Yes	3422	19	0.070444	1900	-41.0672	0	8	0.070444	800	-11.6026	190	790	-6.70901	1100	16
2	12322984	12323484	AT2G28710	+	1881	2	12307338	12307838	AT2G28690	+	127	Yes	Yes	15646	10	0.070444	1000	-16.3054	0.024383	5	0.070444	500	-5.65985	1912	129	-2.74523	500	6
1	29733496	29733996	AT1G79030	+	944	1	29713948	29714448	AT1G78990	+	1690	Yes	Yes	19548	7	0.083565	590.093	-9.41007	1	0	0	0	0	0	0	0	590.093	2
3	1173528	1174028	AT3G04420	+	1496	3	1165031	1165531	AT3G04390	+	26	Yes	NA	8497	6	0.070444	600	-7.86742	1	4	0.070444	400	-4.16326	1718	18	-0.993891	200	2
2	17154924	17155424	AT2G41150	+	1062	2	17138459	17138959	AT2G41100	+	464	Yes	Yes	16465	6	0.070444	600	-7.45068	1	3	0.070444	300	-2.52467	1117	426	-1.69205	300	2
1	21182335	21182835	AT1G56540	+	718	1	21169953	21170453	AT1G56510	+	305	Yes	Yes	12382	8	0.070444	800	-11.5591	1	1	0.070444	100	-0.457466	797	241	-9.45819	700	-4
1	29487113	29487613	AT1G78380	+	1056	1	29467953	29468453	AT1G78320	+	74	Yes	NA	19160	7	0.070444	700	-9.60933	1	2	0.070444	200	-1.33091	1239	92	-4.17404	500	2
2	13842494	13842994	AT2G32620	+	96	2	13836569	13837069	AT2G32610	+	1822	NA	Yes	5925	20	0.070444	2000	-45.2214	0	7	0.070444	700	-9.57181	89	1662	-9.82719	1300	-16
1	21718019	21718519	AT1G58450	+	879	1	21712048	21712548	AT1G58430	+	1309	Yes	Yes	5971	9	0.070444	900	-13.73	0.263945	8	0.095265	591.562	-11.5068	1160	1588	-1.92485	308.438	4
1	20173374	20173874	AT1G54040	+	798	1	20160064	20160564	AT1G54010	+	656	Yes	Yes	13310	6	0.070444	600	-7.44411	1	2	0.070444	200	-1.33089	848	807	-2.94829	400	2
1	17518545	17519045	AT1G47640	+	82	1	17509407	17509907	AT1G47620	+	1103	NA	Yes	9138	7	0.070444	700	-9.58755	1	2	0.070444	200	-1.33092	63	1028	-4.2096	500	2
1	5537965	5538465	AT1G16160	+	49	1	5518511	5519011	AT1G16110	+	1392	NA	Yes	19454	7	0.070444	700	-9.72611	1	4	0.070444	400	-4.02038	59	1464	-1.56436	300	2
1	10311419	10311919	AT1G29470	+	32	1	10303125	10303625	AT1G29430	+	1368	NA	Yes	8294	7	0.070444	700	-9.92017	1	3	0.070444	300	-2.55951	32	1645	-2.60504	400	2
1	2351496	2351996	AT1G07630	+	59	1	2345993	2346493	AT1G07620	+	1070	NA	Yes	5503	12	0.070444	1200	-21.926	0.000121	1	0.070444	100	-0.452578	48	1209	-19.4538	1100	-8
2	1165556	1166056	AT2G03820	+	84	2	1149928	1150428	AT2G03760	+	798	NA	Yes	15628	7	0.070444	700	-9.58277	1	2	0.070444	200	-1.33091	85	854	-4.18031	500	2
1	18187032	18187532	AT1G49180	+	1324	1	18177574	18178074	AT1G49140	+	121	Yes	NA	9458	6	0.070444	600	-7.51537	1	3	0.070444	300	-2.53188	1556	117	-1.70084	300	2
2	11013477	11013977	AT2G25810	+	80	2	11000969	11001469	AT2G25790	+	1460	NA	Yes	12508	11	0.070444	1100	-19.0149	0.001927	6	0.070444	600	-7.57462	73	1403	-2.58921	500	6
2	10756579	10757079	AT2G25260	+	594	2	10751620	10752120	AT2G25240	+	91	Yes	NA	4959	6	0.070444	600	-7.54487	1	0	0.070444	0	1.00732	392	69	1.00732	600	2
1	6421416	6421916	AT1G18660	+	42	1	6409559	6410059	AT1G18620	+	1790	NA	Yes	11857	9	0.070444	900	-14.4356	0.149284	0	0	0	0	0	0	0	900	4
1	9559918	9560418	AT1G27520	+	43	1	9544499	9544999	AT1G27480	+	1804	NA	Yes	15419	8	0.070444	800	-12.025	1	3	0.070444	300	-2.57068	25	1910	-3.71847	500	4
1	19026348	19026848	AT1G51320	+	1207	1	19002126	19002626	AT1G51250	+	396	Yes	Yes	24222	6	0.070444	600	-7.45454	1	3	0.070444	300	-2.52507	1240	371	-1.69253	300	2
1	25267944	25268444	AT1G67455	+	1144	1	25257037	25257537	AT1G67420	+	127	Yes	Yes	10907	6	0.070444	600	-7.51118	1	1	0.070444	100	-0.455897	1053	105	-5.6714	500	2
1	22259023	22259523	AT1G60410	+	651	1	22255470	22255970	AT1G60400	+	160	Yes	Yes	3553	8	0.070444	800	-11.6245	1	2	0.070444	200	-1.3309	579	114	-5.49216	600	4
1	30139079	30139579	AT1G80120	+	88	1	30135875	30136375	AT1G80110	+	1010	NA	Yes	3204	16	0.070444	1600	-32.8966	0	8	0.070444	800	-11.9546	49	1181	-4.65947	800	12
2	14425995	14426495	AT2G34160	+	92	2	14414492	14414992	AT2G34140	+	927	NA	Yes	11503	6	0.070444	600	-7.54357	1	4	0.070444	400	-3.99648	101	925	-0.991185	200	2
1	12324022	12324522	AT1G33930	+	1316	1	12311461	12311961	AT1G33900	+	158	Yes	Yes	12561	6	0.070444	600	-7.49466	1	2	0.070444	200	-1.3309	1455	145	-2.96812	400	2
1	6409495	6409995	AT1G18620	+	1790	1	6398561	6399061	AT1G18590	+	66	Yes	NA	10934	10	0.070444	1000	-16.5956	0.019281	0	0	0	0	0	0	0	1000	6
2	11825509	11826009	AT2G27760	+	92	2	11823818	11824318	AT2G27750	+	400	NA	Yes	1691	7	0.070444	700	-9.56582	1	5	0.070444	500	-5.67323	102	419	-0.957106	200	2
1	24979634	24980134	AT1G66950	+	69	1	24970473	24970973	AT1G66930	+	1122	NA	Yes	9161	6	0.070444	600	-7.58342	1	2	0.070444	200	-1.33093	55	1220	-3.00958	400	2
1	28247460	28247960	AT1G75260	+	118	1	28241010	28241510	AT1G75240	+	736	NA	Yes	6450	7	0.070444	700	-9.52698	1	4	0.070444	400	-3.99934	93	1052	-1.55414	300	2
3	825584	826084	AT3G03470	+	475	3	820452	820952	AT3G03450	+	90	Yes	NA	5132	7	0.070444	700	-9.56977	1	2	0.070444	200	-1.33091	525	76	-4.19016	500	2
1	623886	624386	AT1G02820	+	1866	1	613080	613580	AT1G02800	+	137	Yes	NA	10806	8	0.070444	800	-11.6479	1	0	0	0	0	0	0	0	800	4
3	1544444	1544944	AT3G05380	+	49	3	1538115	1538615	AT3G05370	+	954	NA	Yes	6329	9	0.070444	900	-14.3218	0.166357	2	0.070444	200	-1.33094	51	967	-7.14723	700	-4
2	18071412	18071912	AT2G43535	+	1124	2	18070027	18070527	AT2G43530	+	569	Yes	Yes	1385	35	0.070444	3500	-94.1165	0	21	0.070444	2100	-46.7394	1172	477	-5.38937	1400	36
1	497554	498054	AT1G02450	+	67	1	487001	487501	AT1G02400	+	1418	NA	Yes	10553	6	0.070444	600	-7.58823	1	3	0.070444	300	-2.53568	85	1749	-1.70555	300	2
1	18516451	18516951	AT1G50000	+	50	1	18508953	18509453	AT1G49980	+	1253	NA	Yes	7498	12	0.070444	1200	-22.1285	9.9e-05	6	0.070444	600	-7.61756	57	1370	-3.38849	600	8
2	15068138	15068638	AT2G35890	+	1091	2	15055430	15055930	AT2G35840	+	307	Yes	Yes	12708	8	0.070444	800	-11.5586	1	3	0.070444	300	-2.52519	1075	357	-3.41513	500	4
1	8663529	8664029	AT1G24440	+	113	1	8658934	8659434	AT1G24430	+	1154	NA	Yes	4595	19	0.070444	1900	-41.736	0	9	0.070444	900	-14.0591	82	1065	-5.79136	1000	16
1	435591	436091	AT1G02230	+	1354	1	429026	429526	AT1G02220	+	286	Yes	Yes	6565	21	0.070444	2100	-47.0177	0	6	0.070444	600	-7.46591	1373	277	-12.5213	1500	-18
3	5147897	5148397	AT3G15300	+	185	3	5133952	5134452	AT3G15240	+	1751	Yes	Yes	13945	9	0.070444	900	-13.8539	0.240219	4	0.070444	400	-3.98649	145	1927	-3.02318	500	4
1	5841042	5841542	AT1G17080	+	51	1	5834453	5834953	AT1G17060	+	826	NA	Yes	6589	6	0.070444	600	-7.64097	1	4	0.070444	400	-4.01502	65	923	-0.991291	200	2
1	10013990	10014490	AT1G28480	+	1623	1	10006107	10006607	AT1G28460	+	462	Yes	Yes	7883	19	0.070444	1900	-40.6259	0	12	0.070444	1200	-21.0385	1684	428	-2.80914	700	14
1	1918406	1918906	AT1G06270	+	1502	1	1914015	1914515	AT1G06250	+	37	Yes	NA	4391	11	0.070444	1100	-19.8042	0.000905	2	0.070444	200	-1.33177	1490	12	-12.5698	900	-6
2	11930994	11931494	AT2G28010	+	1740	2	11927032	11927532	AT2G28000	+	96	Yes	NA	3962	21	0.070444	2100	-48.4913	0	10	0.070444	1000	-16.5956	1676	66	-6.58221	1100	18
1	19359536	19360036	AT1G52060	+	446	1	19355955	19356455	AT1G52050	+	548	Yes	Yes	3581	12	0.070444	1200	-21.0332	0.000268	5	0.070444	500	-5.62458	443	555	-4.32862	700	8
1	23535431	23535931	AT1G63460	+	67	1	23531998	23532498	AT1G63450	+	1457	NA	Yes	3433	10	0.070444	1000	-16.5863	0.019439	4	0.070444	400	-4.0235	56	1496	-4.06584	600	6
3	2650496	2650996	AT3G08720	+	80	3	2645495	2645995	AT3G08710	+	1276	NA	Yes	5001	17	0.070444	1700	-36.083	0	7	0.070444	700	-9.63285	67	1633	-6.70042	1000	14
3	2089065	2089565	AT3G66654	+	90	3	2077616	2078116	AT3G06640	+	1703	NA	Yes	11449	8	0.070444	800	-11.7343	1	5	0.070444	500	-5.67323	102	1864	-1.45216	300	4
1	27087918	27088418	AT1G71960	+	553	1	27079531	27080031	AT1G71940	+	53	Yes	NA	8387	6	0.070444	600	-7.63255	1	0	0.070444	0	1.01128	545	45	1.01128	600	2
1	17600092	17600592	AT1G47790	+	765	1	17589959	17590459	AT1G47770	+	334	Yes	Yes	10133	6	0.070444	600	-7.45944	1	1	0.070444	100	-0.457708	722	301	-5.63135	500	2
1	22490634	22491134	AT1G61065	+	966	1	22484489	22484989	AT1G61040	+	138	Yes	NA	6145	8	0.070444	800	-11.6467	1	3	0.070444	300	-2.52958	918	152	-3.44169	500	4
1	12879036	12879536	AT1G35181	+	1122	1	12852431	12852931	AT1G35140	+	60	Yes	NA	26605	7	0.070444	700	-9.66213	1	6	0.070444	600	-7.55806	1151	82	-0.579016	100	2
2	15159935	15160435	AT2G36100	+	1370	2	15142955	15143455	AT2G36060	+	93	Yes	NA	16980	7	0.070444	700	-9.56391	1	0	0.070444	0	1.00579	1184	87	1.00579	700	2
1	26898638	26899138	AT1G71370	+	641	1	26893962	26894462	AT1G71360	+	128	Yes	NA	4676	16	0.070444	1600	-32.475	0	11	0.070444	1100	-18.7383	677	145	-1.98591	500	12
1	9546971	9547471	AT1G27490	+	61	1	9544921	9545421	AT1G27480	+	677	Yes	Yes	2050	13	0.070444	1300	-24.6633	9e-06	5	0.070444	500	-5.75687	45	993	-5.80781	800	8
1	1730572	1731072	AT1G05785	+	1354	1	1707925	1708425	AT1G05690	+	151	Yes	Yes	22647	6	0.070444	600	-7.49779	1	0	0.070444	0	1.00372	1262	135	1.00372	600	2
1	28194961	28195461	AT1G75110	+	1395	1	28193431	28193931	AT1G75100	+	1260	Yes	Yes	1530	77	0.092068	5891.51	-263.863	0	50	0.092531	3806.53	-150.581	1680	1065	-8.7183	2084.98	-102
3	5497531	5498031	AT3G16220	+	1571	3	5490453	5490953	AT3G16190	+	64	Yes	NA	7078	10	0.070444	1000	-16.6151	0.018949	7	0.070444	700	-9.62217	1873	70	-1.3328	300	6
3	6458981	6459481	AT3G18760	+	94	3	6452545	6453045	AT3G18730	+	1124	NA	Yes	6436	12	0.070444	1200	-21.5271	0.000174	6	0.070444	600	-7.55971	81	912	-3.31276	600	8
1	2904029	2904529	AT1G09020	+	1343	1	2895487	2895987	AT1G09010	+	78	Yes	NA	8542	9	0.070444	900	-14.0785	0.20475	2	0.070444	200	-1.3309	1385	108	-6.96575	700	-4
1	25615103	25615603	AT1G68340	+	1475	1	25600507	25601007	AT1G68310	+	72	Yes	NA	14596	6	0.070444	600	-7.57672	1	0	0	0	0	0	0	0	600	2
2	15124552	15125052	AT2G36020	+	1139	2	15109416	15109916	AT2G35970	+	502	Yes	Yes	15136	7	0.070444	700	-9.42451	1	5	0.070444	500	-5.62285	1270	504	-0.957014	200	2
1	3061108	3061608	AT1G09483	+	1637	1	3042456	3042956	AT1G09430	+	49	Yes	NA	18652	6	0.070444	600	-7.65012	1	1	0.070444	100	-0.453454	1714	56	-5.72695	500	2
1	477469	477969	AT1G02380	+	299	1	476050	476550	AT1G02370	+	98	Yes	NA	1419	9	0.070444	900	-13.9979	0.216992	3	0.070444	300	-2.53734	417	76	-4.58278	600	4
3	2848495	2848995	AT3G09270	+	970	3	2842522	2843022	AT3G09260	+	210	Yes	Yes	5973	16	0.070444	1600	-32.128	0	10	0.070444	1000	-16.2276	1037	171	-2.56125	600	12
3	3516607	3517107	AT3G11230	+	791	3	3515398	3515898	AT3G11220	+	1107	NA	Yes	1209	34	0.070444	3400	-90.2302	0	25	0.070444	2500	-59.2462	990	1055	-2.675	900	34
1	27180964	27181464	AT1G72210	+	108	1	27170514	27171014	AT1G72200	+	1141	Yes	Yes	10450	9	0.070444	900	-13.9691	0.221417	3	0.070444	300	-2.53074	132	1276	-4.51613	600	4
1	29614356	29614856	AT1G78750	+	1344	1	29608437	29608937	AT1G78730	+	160	Yes	NA	5919	8	0.070444	800	-11.6245	1	7	0.070444	700	-9.49016	1306	162	-0.591333	100	4
1	21182362	21182862	AT1G56540	+	718	1	21177510	21178010	AT1G56520	+	247	Yes	Yes	4852	8	0.070444	800	-11.5759	1	3	0.070444	300	-2.52654	797	252	-3.42325	500	4
1	9933958	9934458	AT1G28330	+	169	1	9932824	9933324	AT1G28327	+	264	NA	Yes	1134	10	0.070444	1000	-16.2302	0.025876	3	0.070444	300	-2.52771	201	205	-5.65335	700	6
1	28606915	28607415	AT1G76250	+	50	1	28599961	28600461	AT1G76230	+	1536	NA	Yes	6954	12	0.070444	1200	-22.1285	9.9e-05	5	0.070444	500	-5.72079	59	1501	-4.60638	700	8
1	6818886	6819386	AT1G19715	+	56	1	6804394	6804894	AT1G19670	+	593	NA	Yes	14492	6	0.070444	600	-7.6211	1	0	0.070444	0	1.00789	64	712	1.00789	600	2
1	20170423	20170923	AT1G54040	+	48	1	20162543	20163043	AT1G54020	+	884	Yes	Yes	7880	7	0.070444	700	-9.73347	1	3	0.070444	300	-2.53869	70	800	-2.53223	400	2
1	4116119	4116619	AT1G12120	+	102	1	4095151	4095651	AT1G12100	+	1140	NA	Yes	20968	7	0.070444	700	-9.54847	1	1	0.070444	100	-0.456361	126	1240	-7.51185	600	-2
2	19481521	19482021	AT2G47470	+	49	2	19476576	19477076	AT2G47460	+	987	NA	Yes	4945	9	0.070444	900	-14.3218	0.166357	5	0.070444	500	-5.70155	71	849	-2.07436	400	4
2	13677514	13678014	AT2G32210	+	75	2	13674959	13675459	AT2G32190	+	1225	NA	Yes	2555	16	0.070444	1600	-33.1392	0	8	0.070444	800	-11.9993	45	990	-4.72781	800	12
2	10756573	10757073	AT2G25260	+	594	2	10754468	10754968	AT2G25250	+	69	Yes	NA	2105	10	0.070444	1000	-16.5686	0.019741	4	0.070444	400	-4.00054	392	90	-3.97763	600	6
1	19025443	19025943	AT1G51320	+	700	1	19004980	19005480	AT1G51260	+	1405	Yes	Yes	20463	6	0.070444	600	-7.44311	1	3	0.070444	300	-2.52352	741	1088	-1.69067	300	2
1	23942051	23942551	AT1G64450	+	66	1	23934048	23934548	AT1G64430	+	1490	NA	Yes	8003	6	0.070444	600	-7.59074	1	2	0.070444	200	-1.33114	22	1766	-3.12188	400	2
2	16709492	16709992	AT2G40010	+	49	2	16699062	16699562	AT2G39990	+	746	NA	Yes	10430	10	0.070444	1000	-16.8167	0.015719	4	0.070444	400	-4.03233	49	645	-4.10105	600	6
1	12323650	12324150	AT1G33930	+	624	1	12315572	12316072	AT1G33910	+	695	Yes	Yes	8078	8	0.070444	800	-11.5227	1	1	0.070444	100	-0.458194	669	605	-9.41925	700	-4
1	20748841	20749341	AT1G55550	+	454	1	20743030	20743530	AT1G55540	+	88	Yes	NA	5811	6	0.070444	600	-7.54896	1	5	0.070444	500	-5.6714	532	105	-0.573059	100	2
1	24981941	24982441	AT1G66950	+	70	1	24973601	24974101	AT1G66940	+	1226	NA	Yes	8340	8	0.070444	800	-11.808	1	1	0.070444	100	-0.453634	58	1692	-9.67187	700	-4
3	825597	826097	AT3G03470	+	475	3	823972	824472	AT3G03460	+	45	Yes	NA	1625	6	0.070444	600	-7.67099	1	3	0.070444	300	-2.57068	525	25	-1.75203	300	2
1	24838984	24839484	AT1G66580	+	86	1	24825045	24825545	AT1G66540	+	731	NA	Yes	13939	8	0.070444	800	-11.7462	1	5	0.070444	500	-5.66857	110	933	-1.45094	300	4
1	30048987	30049487	AT1G79890	+	42	1	30043869	30044369	AT1G79860	+	716	NA	Yes	5118	6	0.070444	600	-7.68942	1	4	0.070444	400	-4.03233	49	812	-0.991432	200	2
2	10712498	10712998	AT2G25169	+	138	2	10710863	10711363	AT2G25160	+	1686	NA	Yes	1635	15	0.070444	1500	-29.5253	0	5	0.070444	500	-5.69654	75	1611	-7.82953	1000	-10
3	2858492	2858992	AT3G09300	+	1560	3	2841488	2841988	AT3G09260	+	169	Yes	Yes	17004	7	0.070444	700	-9.4861	1	2	0.070444	200	-1.3309	1540	145	-4.1466	500	2
1	22962381	22962881	AT1G62130	+	43	1	22949481	22949981	AT1G62085	+	1437	NA	Yes	12900	7	0.070444	700	-9.7758	1	3	0.070444	300	-2.55422	37	1604	-2.58598	400	2
1	9246878	9247378	AT1G26750	+	70	1	9225036	9225536	AT1G26690	+	1619	NA	Yes	21842	6	0.070444	600	-7.58112	1	3	0.070444	300	-2.53714	77	2031	-1.70737	300	2
1	623496	623996	AT1G02820	+	481	1	620635	621135	AT1G02813	+	914	Yes	Yes	2861	9	0.070444	900	-13.757	0.259014	5	0.070444	500	-5.62166	557	1247	-2.02171	400	4
1	20748604	20749104	AT1G55550	+	517	1	20744586	20745086	AT1G55546	+	75	Yes	NA	4018	8	0.070444	800	-11.7857	1	4	0.070444	400	-4.00522	393	80	-2.25108	400	4
3	2867938	2868438	AT3G09340	+	98	3	2858424	2858924	AT3G09300	+	1560	NA	Yes	9514	8	0.070444	800	-11.7136	1	4	0.070444	400	-3.99785	97	1540	-2.2419	400	4
1	624399	624899	AT1G02820	+	790	1	621588	622088	AT1G02816	+	1033	Yes	Yes	2811	37	0.070444	3700	-101.115	0	22	0.070444	2200	-49.6301	1043	1143	-5.68222	1500	38
2	6802457	6802957	AT2G15590	+	898	2	6789879	6790379	AT2G15560	+	29	Yes	NA	12578	6	0.070444	600	-7.81763	1	4	0.070444	400	-4.07083	756	32	-0.991896	200	2
1	26752107	26752607	AT1G70949	+	793	1	26733981	26734481	AT1G70910	+	136	Yes	NA	18126	7	0.070444	700	-9.50897	1	3	0.070444	300	-2.52868	791	172	-2.49932	400	2
1	2888520	2889020	AT1G08990	+	1643	1	2877985	2878485	AT1G08940	+	48	Yes	NA	10535	10	0.070444	1000	-16.835	0.015445	3	0.070444	300	-2.54558	1794	50	-5.92479	700	6
1	20439977	20440477	AT1G54780	+	667	1	20431509	20432009	AT1G54740	+	1600	Yes	Yes	8468	8	0.070444	800	-11.5205	1	1	0.070444	100	-0.458252	688	1514	-9.41616	700	-4
3	3564469	3564969	AT3G11380	+	108	3	3561956	3562456	AT3G11370	+	1589	NA	Yes	2513	22	0.070444	2200	-51.5326	0	8	0.070444	800	-11.8577	61	1332	-10.9331	1400	-20
1	6985009	6985509	AT1G20135	+	622	1	6972075	6972575	AT1G20110	+	177	Yes	NA	12934	8	0.070444	800	-11.6112	1	2	0.070444	200	-1.3309	656	186	-5.45432	600	4
2	10396892	10397392	AT2G24490	+	124	2	10394997	10395497	AT2G24460	+	1088	Yes	Yes	1895	9	0.070444	900	-13.9331	0.227018	2	0.070444	200	-1.33092	68	670	-7.05937	700	-4
1	10013995	10014495	AT1G28480	+	1623	1	10012037	10012537	AT1G28470	+	55	Yes	NA	1958	22	0.070444	2200	-53.9382	0	15	0.070444	1500	-31.2904	1684	43	-3.18493	700	20
1	18783579	18784079	AT1G50700	+	68	1	18779645	18780145	AT1G50690	+	249	NA	Yes	3934	8	0.070444	800	-11.8178	1	3	0.070444	300	-2.53714	77	311	-3.48867	500	4
1	3396412	3396912	AT1G10360	+	1501	1	3387555	3388055	AT1G10320	+	56	Yes	NA	8857	6	0.070444	600	-7.6211	1	3	0.070444	300	-2.53919	1524	68	-1.70995	300	2
1	23391440	23391940	AT1G63090	+	365	1	23384610	23385110	AT1G63060	+	1332	NA	Yes	6830	7	0.070444	700	-9.43614	1	3	0.070444	300	-2.52524	351	1266	-2.48829	400	2
3	2087905	2088405	AT3G66654	+	116	3	2078947	2079447	AT3G06650	+	886	NA	Yes	8958	6	0.070444	600	-7.5192	1	3	0.070444	300	-2.53262	109	1018	-1.70175	300	2
2	18713024	18713524	AT2G45410	+	91	2	18704120	18704620	AT2G45400	+	871	NA	Yes	8904	9	0.070444	900	-14.0219	0.213335	5	0.070444	500	-5.67871	94	997	-2.05884	400	4
1	22491022	22491522	AT1G61065	+	832	1	22487957	22488457	AT1G61050	+	467	Yes	Yes	3065	22	0.070444	2200	-49.8852	0	5	0.070444	500	-5.62337	849	484	-16.5854	1700	-18
1	4848061	4848561	AT1G14180	+	662	1	4843578	4844078	AT1G14170	+	93	Yes	NA	4483	7	0.070444	700	-9.56391	1	2	0.070444	200	-1.3309	757	109	-4.16224	500	2
2	15159973	15160473	AT2G36100	+	1370	2	15144993	15145493	AT2G36070	+	120	Yes	NA	14980	11	0.070444	1100	-18.8079	0.00229	4	0.070444	400	-3.99015	1184	125	-4.94821	700	6
1	18202021	18202521	AT1G49210	+	1404	1	18182031	18182531	AT1G49160	+	980	Yes	Yes	19990	6	0.07207	586.461	-7.43888	1	7	0.101573	485.471	-9.40527	1469	1337	-0.913081	100.99	2
1	20080570	20081070	AT1G53790	+	1570	1	20073457	20073957	AT1G53770	+	143	Yes	NA	7113	18	0.070444	1800	-38.3418	0	12	0.070444	1200	-21.2859	1662	151	-2.38262	600	14
2	7893521	7894021	AT2G18150	+	1840	2	7852462	7852962	AT2G18070	+	846	Yes	Yes	41059	7	0.081537	604.771	-9.41197	1	1	0.070444	100	-0.458273	1816	723	-5.61905	504.771	2
1	25615053	25615553	AT1G68340	+	1475	1	25604069	25604569	AT1G68320	+	112	Yes	NA	10984	9	0.070444	900	-13.9591	0.222964	0	0	0	0	0	0	0	900	4
1	25710404	25710904	AT1G68520	+	1500	1	25677526	25678026	AT1G68470	+	168	Yes	NA	32878	8	0.070444	800	-11.6179	1	6	0.070444	600	-7.48247	2011	193	-0.932207	200	4
3	5510562	5511062	AT3G16260	+	74	3	5505987	5506487	AT3G16240	+	873	NA	Yes	4575	7	0.070444	700	-9.60933	1	2	0.070444	200	-1.33091	82	1078	-4.18335	500	2
2	15123550	15124050	AT2G36020	+	270	2	15110323	15110823	AT2G35980	+	1220	Yes	NA	13227	7	0.070444	700	-9.4512	1	5	0.070444	500	-5.63917	220	1285	-0.95703	200	2
1	3061001	3061501	AT1G09483	+	1637	1	3047992	3048492	AT1G09440	+	52	Yes	NA	13009	8	0.070444	800	-11.9259	1	7	0.070444	700	-9.61557	1714	72	-0.583472	100	4
2	15005571	15006071	AT2G35700	+	934	2	14998040	14998540	AT2G35680	+	79	Yes	NA	7531	8	0.070444	800	-11.77	1	3	0.070444	300	-2.53945	1049	67	-3.50338	500	4
2	18959075	18959575	AT2G46140	+	1456	2	18950978	18951478	AT2G46090	+	95	Yes	NA	8097	14	0.070444	1400	-26.9963	1e-06	6	0.070444	600	-7.51841	1305	117	-4.94032	800	10
2	11447628	11448128	AT2G26840	+	746	2	11441481	11441981	AT2G26820	+	64	Yes	NA	6147	7	0.070444	700	-9.64458	1	1	0.070444	100	-0.454561	582	71	-7.57889	600	-2
1	19401437	19401937	AT1G52130	+	101	1	19385299	19385799	AT1G52100	+	522	NA	Yes	16138	8	0.070444	800	-11.7067	1	4	0.070444	400	-3.99434	108	511	-2.23757	400	4
1	25464902	25465402	AT1G67900	+	628	1	25457093	25457593	AT1G67890	+	729	Yes	Yes	7809	11	0.070444	1100	-18.4887	0.002998	4	0.070444	400	-3.96842	742	722	-4.83463	700	6
1	29614422	29614922	AT1G78750	+	1344	1	29610005	29610505	AT1G78740	+	231	Yes	NA	4417	39	0.070444	3900	-110.846	0	24	0.070444	2400	-56.7325	1306	265	-5.71775	1500	42
2	17154831	17155331	AT2G41150	+	1062	2	17142028	17142528	AT2G41120	+	150	Yes	NA	12803	6	0.070444	600	-7.49826	1	0	0.070444	0	1.00426	1117	118	1.00426	600	2
2	18087999	18088499	AT2G43610	+	133	2	18082476	18082976	AT2G43590	+	1035	NA	Yes	5523	14	0.070444	1400	-26.7362	1e-06	9	0.070444	900	-13.9133	135	1089	-2.1486	500	10
1	21184914	21185414	AT1G56540	+	200	1	21180842	21181342	AT1G56530	+	316	Yes	Yes	4072	6	0.070444	600	-7.48056	1	2	0.070444	200	-1.3309	162	197	-2.96555	400	2
2	12931566	12932066	AT2G30340	+	696	2	12924100	12924600	AT2G30310	+	84	Yes	NA	7466	6	0.070444	600	-7.55488	1	2	0.070444	200	-1.33091	757	82	-2.98726	400	2
1	1803041	1803541	AT1G05940	+	1023	1	1789485	1789985	AT1G05900	+	112	Yes	NA	13556	6	0.070444	600	-7.52252	1	3	0.070444	300	-2.53197	1052	116	-1.70094	300	2
1	6816929	6817429	AT1G19715	+	51	1	6806054	6806554	AT1G19680	+	1577	NA	Yes	10875	8	0.070444	800	-11.9351	1	5	0.070444	500	-5.77196	41	1806	-1.47934	300	4
1	20173455	20173955	AT1G54040	+	798	1	20168988	20169488	AT1G54030	+	80	Yes	NA	4467	12	0.070444	1200	-21.6421	0.000157	4	0.070444	400	-4.00687	848	77	-6.17903	800	8
1	26922851	26923351	AT1G71440	+	69	1	26916579	26917079	AT1G71410	+	1071	NA	Yes	6272	6	0.070444	600	-7.58342	1	1	0.070444	100	-0.45418	65	1318	-5.71025	500	2
2	18777964	18778464	AT2G45560	+	1120	2	18775003	18775503	AT2G45550	+	466	Yes	Yes	2961	29	0.070444	2900	-73.0536	0	16	0.070444	1600	-31.9196	1251	348	-5.71411	1300	28
1	9447958	9448458	AT1G27190	+	109	1	9426079	9426579	AT1G27130	+	1322	NA	Yes	21879	6	0.070444	600	-7.52518	1	2	0.070444	200	-1.33091	96	1405	-2.98077	400	2
2	9159011	9159511	AT2G21400	+	1017	2	9150967	9151467	AT2G21385	+	58	Yes	NA	8044	6	0.070444	600	-7.61415	1	2	0.070444	200	-1.33093	950	56	-3.00835	400	2
2	17909436	17909936	AT2G43060	+	1003	2	17902987	17903487	AT2G43050	+	51	Yes	NA	6449	8	0.070444	800	-11.9351	1	4	0.070444	400	-4.03866	953	45	-2.29429	400	4
1	18186438	18186938	AT1G49180	+	1361	1	18182012	18182512	AT1G49160	+	980	Yes	Yes	4426	13	0.070444	1300	-23.5466	2.4e-05	10	0.09217	764.288	-16.0373	1333	1337	-3.02421	535.712	8
1	19026102	19026602	AT1G51320	+	1737	1	19008969	19009469	AT1G51270	+	306	Yes	Yes	17133	8	0.070444	800	-11.5589	1	4	0.070444	400	-3.97711	1978	247	-2.2167	400	4
1	25268346	25268846	AT1G67455	+	676	1	25265440	25265940	AT1G67440	+	284	Yes	Yes	2906	9	0.070444	900	-13.7987	0.250841	1	0.070444	100	-0.457604	600	272	-11.5678	800	-4
2	15208531	15209031	AT2G36290	+	55	2	15203100	15203600	AT2G36260	+	547	NA	Yes	5431	6	0.070444	600	-7.62477	1	3	0.070444	300	-2.53656	80	557	-1.70664	300	2
1	23941911	23942411	AT1G64450	+	66	1	23936935	23937435	AT1G64440	+	867	NA	Yes	4976	6	0.070444	600	-7.59074	1	1	0.070444	100	-0.445282	22	886	-5.92679	500	2
2	5927473	5927973	AT2G14080	+	33	2	5909539	5910039	AT2G14050	+	1546	NA	Yes	17934	6	0.070444	600	-7.76652	1	1	0.070444	100	-0.443136	19	1641	-5.98326	500	2
1	3952002	3952502	AT1G11720	+	366	1	3950477	3950977	AT1G11710	+	127	Yes	NA	1525	13	0.070444	1300	-24.0223	1.6e-05	3	0.070444	300	-2.53422	334	95	-9.96362	1000	-8
1	12168998	12169498	AT1G33560	+	114	1	12158477	12158977	AT1G33520	+	840	NA	Yes	10521	6	0.070444	600	-7.52083	1	1	0.070444	100	-0.456304	123	810	-5.6623	500	2
1	27575974	27576474	AT1G73350	+	79	1	27573465	27573965	AT1G73340	+	1460	NA	Yes	2509	27	0.070444	2700	-70.2407	0	7	0.070444	700	-9.87097	35	1319	-21.5262	2000	-26
2	13410428	13410928	AT2G31480	+	1490	2	13396541	13397041	AT2G31430	+	124	Yes	NA	13887	8	0.070444	800	-11.6651	1	6	0.070444	600	-7.52083	1391	114	-0.932273	200	4
2	16849537	16850037	AT2G40340	+	1694	2	16830631	16831131	AT2G40290	+	106	Yes	NA	18906	6	0.070444	600	-7.52798	1	2	0.070444	200	-1.3309	1674	135	-2.96994	400	2
1	11255031	11255531	AT1G31430	+	57	1	11249587	11250087	AT1G31420	+	801	NA	Yes	5444	10	0.070444	1000	-16.695	0.017624	4	0.070444	400	-4.00013	91	784	-3.97609	600	6
1	12323890	12324390	AT1G33930	+	1316	1	12322499	12322999	AT1G33925	+	214	Yes	Yes	1391	10	0.070444	1000	-16.1831	0.026867	5	0.070444	500	-5.65116	1455	156	-2.73474	500	6
1	9273952	9274452	AT1G26790	+	752	1	9241098	9241598	AT1G26730	+	47	Yes	NA	32854	6	0.070444	600	-7.66008	1	2	0.070444	200	-1.33093	994	60	-3.00386	400	2
2	9766043	9766543	AT2G22950	+	1045	2	9762955	9763455	AT2G22940	+	152	Yes	Yes	3088	15	0.070444	1500	-29.4593	0	7	0.070444	700	-9.51347	1024	131	-4.5477	800	10
1	24839465	24839965	AT1G66580	+	75	1	24828431	24828931	AT1G66550	+	1431	NA	Yes	11034	6	0.070444	600	-7.57058	1	1	0.070444	100	-0.453961	62	1563	-5.71526	500	2
1	20022927	20023427	AT1G53640	+	121	1	20019488	20019988	AT1G53635	+	371	NA	Yes	3439	8	0.070444	800	-11.6696	1	6	0.070444	600	-7.4922	164	416	-0.93222	200	4
2	13326075	13326575	AT2G31260	+	688	2	13320527	13321027	AT2G31250	+	149	Yes	Yes	5548	8	0.070444	800	-11.6348	1	1	0.070444	100	-0.456094	481	113	-9.53302	700	-4
2	17767037	17767537	AT2G42660	+	531	2	17765552	17766052	AT2G42650	+	191	Yes	NA	1485	21	0.070444	2100	-47.3722	0	7	0.070444	700	-9.4732	456	196	-10.4591	1400	-18
2	9765962	9766462	AT2G22950	+	1045	2	9764028	9764528	AT2G22942	+	155	Yes	Yes	1934	15	0.070444	1500	-29.4468	0	4	0.070444	400	-4.00993	1024	72	-10.1977	1100	-10
3	2858522	2859022	AT3G09300	+	1560	3	2848536	2849036	AT3G09270	+	970	Yes	Yes	9986	6	0.079261	533.256	-7.43898	1	1	0.08259	85.2941	-0.458394	1540	1037	-5.61641	447.962	2
1	18913412	18913912	AT1G51020	+	1086	1	18905081	18905581	AT1G50990	+	124	Yes	Yes	8331	7	0.070444	700	-9.52038	1	2	0.070444	200	-1.3309	1092	133	-4.15085	500	2
2	15068970	15069470	AT2G35890	+	1571	2	15061674	15062174	AT2G35860	+	61	Yes	NA	7296	6	0.070444	600	-7.60462	1	2	0.070444	200	-1.33095	1430	45	-3.02509	400	2
1	1168410	1168910	AT1G04360	+	445	1	1164422	1164922	AT1G04340	+	99	Yes	NA	3988	7	0.070444	700	-9.5533	1	3	0.070444	300	-2.53303	479	105	-2.51347	400	2
1	490617	491117	AT1G02410	+	110	1	481448	481948	AT1G02390	+	668	NA	Yes	9169	8	0.070444	800	-11.6883	1	1	0.070444	100	-0.455897	105	500	-9.54393	700	-4
2	6802468	6802968	AT2G15590	+	898	2	6792933	6793433	AT2G15570	+	45	Yes	NA	9535	8	0.070444	800	-11.9993	1	6	0.070444	600	-7.67684	756	44	-0.932904	200	4
1	6983964	6984464	AT1G20135	+	260	1	6975504	6976004	AT1G20120	+	906	Yes	Yes	8460	6	0.070444	600	-7.46839	1	1	0.070444	100	-0.457149	191	1077	-5.6436	500	2
1	27995437	27995937	AT1G74490	+	459	1	27989068	27989568	AT1G74460	+	1305	Yes	Yes	6369	8	0.070444	800	-11.5352	1	4	0.070444	400	-3.97087	468	1528	-2.20929	400	4
3	5147590	5148090	AT3G15300	+	619	3	5142612	5143112	AT3G15260	+	45	Yes	NA	4978	7	0.070444	700	-9.75766	1	1	0.070444	100	-0.451351	714	40	-7.70335	600	-2
2	11520487	11520987	AT2G26990	+	149	2	11512962	11513462	AT2G26975	+	1296	NA	Yes	7525	16	0.070444	1600	-32.3482	0	8	0.070444	800	-11.6467	138	1684	-4.24298	800	12
1	3396409	3396909	AT1G10360	+	1501	1	3388964	3389464	AT1G10330	+	69	Yes	NA	7445	9	0.070444	900	-14.1309	0.196613	7	0.070444	700	-9.58047	1524	85	-0.913309	200	4
3	2896913	2897413	AT3G09405	+	1658	3	2881997	2882497	AT3G09370	+	118	Yes	NA	14916	8	0.070444	800	-11.6743	1	2	0.070444	200	-1.3309	1757	159	-5.4644	600	4
1	10547353	10547853	AT1G30070	+	601	1	10537514	10538014	AT1G30040	+	690	Yes	Yes	9839	6	0.070444	600	-7.44556	1	5	0.070444	500	-5.61888	737	782	-0.579633	100	2
1	12607051	12607551	AT1G34480	+	117	1	12604089	12604589	AT1G34470	+	501	NA	Yes	2962	12	0.070444	1200	-21.4003	0.000195	2	0.070444	200	-1.33091	86	409	-12.1512	1000	-8
3	1006888	1007388	AT3G03910	+	662	3	1002906	1003406	AT3G03900	+	63	Yes	NA	3982	6	0.070444	600	-7.59879	1	2	0.070444	200	-1.33091	744	77	-2.99017	400	2
2	15159963	15160463	AT2G36100	+	1370	2	15150496	15150996	AT2G36080	+	56	Yes	NA	9467	6	0.070444	600	-7.6211	1	1	0.070444	100	-0.445282	1184	22	-5.92679	500	2
1	22371584	22372084	AT1G60780	+	1691	1	22363033	22363533	AT1G60750	+	49	Yes	NA	8551	8	0.070444	800	-11.9546	1	2	0.070444	200	-1.33099	1946	35	-5.73237	600	4
3	832485	832985	AT3G03500	+	77	3	825933	826433	AT3G03470	+	1015	NA	Yes	6552	11	0.070444	1100	-19.0396	0.001885	4	0.070444	400	-4.01128	70	1201	-5.0647	700	6
2	19492993	19493493	AT2G47500	+	62	2	19485649	19486149	AT2G47485	+	941	NA	Yes	7344	8	0.070444	800	-11.8515	1	2	0.070444	200	-1.33092	62	1145	-5.57734	600	4
3	6546027	6546527	AT3G18980	+	1136	3	6524436	6524936	AT3G18930	+	294	Yes	Yes	21591	8	0.070444	800	-11.5618	1	2	0.070444	200	-1.33089	1380	274	-5.43541	600	4
3	2354833	2355333	AT3G07360	+	60	3	2347483	2347983	AT3G07350	+	1076	NA	Yes	7350	7	0.070444	700	-9.66213	1	1	0.070444	100	-0.453634	58	1080	-7.61415	600	-2
1	25614570	25615070	AT1G68340	+	836	1	25611436	25611936	AT1G68330	+	812	Yes	Yes	3134	27	0.070444	2700	-65.9268	0	17	0.070444	1700	-34.5815	909	917	-3.72574	1000	24
1	25710412	25710912	AT1G68520	+	1500	1	25686908	25687408	AT1G68480	+	95	Yes	NA	23504	7	0.070444	700	-9.56022	1	2	0.070444	200	-1.33091	2011	75	-4.1914	500	2
3	5509023	5509523	AT3G16260	+	919	3	5507966	5508466	AT3G16250	+	478	NA	Yes	1057	39	0.070444	3900	-109.121	0	23	0.070444	2300	-53.0112	1074	526	-6.1984	1600	42
2	18970998	18971498	AT2G46180	+	96	2	18957399	18957899	AT2G46130	+	958	NA	Yes	13599	7	0.070444	700	-9.55843	1	2	0.070444	200	-1.33091	91	1116	-4.17487	500	2
1	5371411	5371911	AT1G15610	+	440	1	5369474	5369974	AT1G15600	+	796	Yes	Yes	1937	14	0.070444	1400	-26.3029	2e-06	3	0.070444	300	-2.52456	443	852	-11.1393	1100	-10
1	28144545	28145045	AT1G74930	+	80	1	28133967	28134467	AT1G74900	+	1858	NA	Yes	10578	13	0.070444	1300	-24.3629	1.2e-05	0	0	0	0	0	0	0	1300	8
1	3061095	3061595	AT1G09483	+	1637	1	3050043	3050543	AT1G09450	+	44	Yes	NA	11052	6	0.070444	600	-7.67684	1	2	0.070444	200	-1.33096	1714	43	-3.02912	400	2
2	15004946	15005446	AT2G35700	+	198	2	15000604	15001104	AT2G35690	+	582	Yes	Yes	4342	10	0.070444	1000	-16.1973	0.02656	2	0.070444	200	-1.3309	143	665	-8.50188	800	-6
2	11447983	11448483	AT2G26840	+	859	2	11446490	11446990	AT2G26830	+	133	Yes	NA	1493	30	0.070444	3000	-78.9536	0	12	0.070444	1200	-21.4648	741	104	-12.3241	1800	-30
1	21951010	21951510	AT1G59725	+	1294	1	21933007	21933507	AT1G59680	+	1821	Yes	Yes	18003	6	0.123427	342.443	-7.43631	1	4	0.125498	224.528	-3.96629	1378	1761	-1.53878	117.915	2
1	11702561	11703061	AT1G32420	+	1718	1	11691025	11691525	AT1G32400	+	42	Yes	NA	11536	8	0.070444	800	-12.0388	1	1	0.070444	100	-0.451351	1753	40	-9.80667	700	-4
1	19402033	19402533	AT1G52130	+	116	1	19388959	19389459	AT1G52110	+	1266	NA	Yes	13074	10	0.070444	1000	-16.3344	0.023844	7	0.070444	700	-9.50168	145	1266	-1.3182	300	6
1	12616015	12616515	AT1G34510	+	68	1	12604578	12605078	AT1G34470	+	1216	NA	Yes	11437	11	0.070444	1100	-19.1278	0.001743	9	0.070444	900	-14.0416	86	1189	-0.885622	200	6
1	959002	959502	AT1G03810	+	1371	1	957487	957987	AT1G03800	+	980	Yes	Yes	1515	62	0.070444	6200	-199.76	0	36	0.070444	3600	-97.3242	1413	955	-9.64758	2600	-78
1	1721939	1722439	AT1G05750	+	1601	1	1690884	1691384	AT1G05650	+	976	Yes	Yes	31055	7	0.081847	602.473	-9.40954	1	1	0.09871	71.3649	-0.458424	1644	1161	-9.40702	531.109	-2
1	8500046	8500546	AT1G24020	+	388	1	8480410	8480910	AT1G23965	+	1260	Yes	Yes	19636	8	0.070444	800	-11.5438	1	3	0.070444	300	-2.52476	412	1337	-3.41255	500	4
1	120032	120532	AT1G01310	+	680	1	118012	118512	AT1G01300	+	250	Yes	NA	2020	25	0.070444	2500	-60.1113	0	10	0.070444	1000	-16.1882	628	208	-9.51736	1500	-22
2	12931951	12932451	AT2G30340	+	1245	2	12927526	12928026	AT2G30320	+	56	Yes	NA	4425	6	0.070444	600	-7.6211	1	3	0.070444	300	-2.54378	1192	54	-1.7158	300	2
1	1803470	1803970	AT1G05940	+	1763	1	1791571	1792071	AT1G05910	+	161	Yes	Yes	11899	9	0.070444	900	-13.8777	0.235991	4	0.070444	400	-3.98337	2010	168	-3.01614	500	4
2	10031588	10032088	AT2G23570	+	119	2	10022011	10022511	AT2G23530	+	1708	NA	Yes	9577	9	0.070444	900	-13.9432	0.225469	4	0.070444	400	-3.99272	114	1809	-3.03735	500	4
1	120095	120595	AT1G01310	+	680	1	119385	119885	AT1G01305	+	1008	Yes	Yes	710	29	0.070444	2900	-72.7882	0	18	0.070444	1800	-37.5611	628	1062	-4.14002	1100	28
2	167892	168392	AT2G01360	+	1296	2	157081	157581	AT2G01320	+	54	Yes	NA	10811	10	0.070444	1000	-16.7361	0.016965	3	0.070444	300	-2.54298	1278	56	-5.88348	700	6
1	17272585	17273085	AT1G46912	+	881	1	17271536	17272036	AT1G46840	+	305	Yes	Yes	1049	25	0.070444	2500	-59.8982	0	12	0.070444	1200	-21.0908	826	307	-6.76243	1300	22
3	359014	359514	AT3G02065	+	115	3	350607	351107	AT3G02050	+	1706	NA	Yes	8407	10	0.070444	1000	-16.3373	0.023794	0	0	0	0	0	0	0	1000	6
1	25267964	25268464	AT1G67455	+	1144	1	25266472	25266972	AT1G67450	+	711	Yes	Yes	1492	47	0.070444	4700	-139.272	0	17	0.070444	1700	-34.6746	1053	538	-19.9905	3000	-54
2	8020474	8020974	AT2G18490	+	1037	2	8010943	8011443	AT2G18480	+	972	Yes	Yes	9531	10	0.070444	1000	-16.0475	0.029996	8	0.070444	800	-11.5095	1010	1180	-0.897832	200	6
1	20091466	20091966	AT1G53820	+	1365	1	20078539	20079039	AT1G53785	+	169	Yes	NA	12927	6	0.070444	600	-7.49028	1	3	0.070444	300	-2.52663	1363	247	-1.69443	300	2
2	13410457	13410957	AT2G31480	+	1490	2	13398990	13399490	AT2G31440	+	95	Yes	NA	11467	7	0.070444	700	-9.56022	1	4	0.070444	400	-3.9908	1391	122	-1.55009	300	2
3	2858478	2858978	AT3G09300	+	1560	3	2850513	2851013	AT3G09280	+	1012	Yes	Yes	7965	17	0.082693	1448.19	-34.5678	0	8	0.104651	538.508	-11.5046	1540	1314	-8.02254	909.679	-12
1	7823012	7823512	AT1G22160	+	111	1	7814542	7815042	AT1G22140	+	612	NA	Yes	8470	7	0.070444	700	-9.5356	1	5	0.070444	500	-5.6534	148	620	-0.957055	200	2
3	2868547	2869047	AT3G09340	+	44	3	2862991	2863491	AT3G09320	+	1468	NA	Yes	5556	7	0.070444	700	-9.76651	1	2	0.070444	200	-1.33105	28	1410	-4.3628	500	2
3	2858499	2858999	AT3G09300	+	1560	3	2854439	2854939	AT3G09285	+	345	Yes	Yes	4060	16	0.070444	1600	-31.9223	0	8	0.070444	800	-11.5325	1540	487	-4.10885	800	12
1	2888476	2888976	AT1G08990	+	1643	1	2881494	2881994	AT1G08960	+	46	Yes	NA	6982	8	0.070444	800	-11.9873	1	7	0.070444	700	-9.66213	1794	60	-0.580527	100	4
2	6801924	6802424	AT2G15590	+	864	2	6798509	6799009	AT2G15580	+	44	Yes	NA	3415	14	0.070444	1400	-28.1531	0	2	0.070444	200	-1.33114	867	22	-18.7268	1200	-10
1	6985043	6985543	AT1G20135	+	622	1	6977922	6978422	AT1G20130	+	417	Yes	Yes	7121	7	0.070444	700	-9.43082	1	6	0.070444	600	-7.44936	656	493	-0.588239	100	2
1	10876954	10877454	AT1G30660	+	862	1	10860018	10860518	AT1G30630	+	578	Yes	NA	16936	6	0.070444	600	-7.44625	1	4	0.070444	400	-3.96867	1051	684	-0.991115	200	2
3	6106013	6106513	AT3G17840	+	64	3	6095405	6095905	AT3G17810	+	894	NA	Yes	10608	6	0.070444	600	-7.59602	1	2	0.070444	200	-1.33092	63	1070	-3.00088	400	2
1	6984972	6985472	AT1G20135	+	622	1	6982001	6982501	AT1G20132	+	1761	Yes	Yes	2971	42	0.070444	4200	-120.099	0	24	0.070444	2400	-56.1354	656	1594	-7.15319	1800	-46
1	3396357	3396857	AT1G10360	+	1501	1	3392499	3392999	AT1G10340	+	63	Yes	NA	3858	12	0.070444	1200	-21.8562	0.000129	4	0.070444	400	-4.04629	1524	41	-6.50379	800	8
1	29415454	29415954	AT1G78172	+	181	1	29414350	29414850	AT1G78170	+	756	NA	Yes	1104	49	0.070444	4900	-152.453	0	37	0.070444	3700	-104.754	155	889	-3.63623	1200	58
3	3191495	3191995	AT3G10310	+	38	3	3186443	3186943	AT3G10300	+	924	NA	Yes	5052	8	0.070444	800	-12.1022	1	2	0.070444	200	-1.33109	25	877	-5.88864	600	4
1	4385464	4385964	AT1G12860	+	105	1	4382087	4382587	AT1G12855	+	555	NA	Yes	3377	13	0.070444	1300	-24.1418	1.4e-05	5	0.070444	500	-5.68435	87	625	-5.49473	800	8
1	18222533	18223033	AT1G49250	+	189	1	18202102	18202602	AT1G49210	+	1404	Yes	Yes	20431	7	0.070444	700	-9.47618	1	1	0.070444	100	-0.457019	176	1469	-7.48778	600	-2
2	15159956	15160456	AT2G36100	+	1370	2	15158912	15159412	AT2G36090	+	434	Yes	Yes	1044	70	0.070444	7000	-237.155	0	37	0.070444	3700	-101.861	1184	418	-14.6819	3300	-92
1	18202026	18202526	AT1G49210	+	1404	1	18187416	18187916	AT1G49180	+	259	Yes	Yes	14610	10	0.070444	1000	-16.1525	0.027553	4	0.070444	400	-3.97797	1469	232	-3.89524	600	6
1	7216421	7216921	AT1G20770	+	105	1	7210043	7210543	AT1G20760	+	292	NA	Yes	6378	11	0.070444	1100	-18.8663	0.002183	3	0.070444	300	-2.53521	88	274	-7.07597	800	-6
1	3824524	3825024	AT1G11362	+	1382	1	3806913	3807413	AT1G11320	+	84	Yes	NA	17611	6	0.070444	600	-7.55488	1	3	0.070444	300	-2.53656	1506	80	-1.70664	300	2
3	9063	9563	AT3G01040	+	1254	3	2553	3053	AT3G01015	+	35	Yes	NA	6510	6	0.070444	600	-7.74569	1	3	0.070444	300	-2.56517	1481	28	-1.74432	300	2
2	11726382	11726882	AT2G27420	+	394	2	11716617	11717117	AT2G27385	+	1212	Yes	Yes	9765	7	0.070444	700	-9.43299	1	3	0.070444	300	-2.52553	323	1330	-2.4892	400	2
3	6546027	6546527	AT3G18980	+	1136	3	6528032	6528532	AT3G18940	+	102	Yes	NA	17995	6	0.070444	600	-7.53199	1	1	0.070444	100	-0.456224	1380	119	-5.66408	500	2
2	17790973	17791473	AT2G42730	+	1297	2	17781543	17782043	AT2G42700	+	31	Yes	NA	9430	6	0.070444	600	-7.79028	1	3	0.070444	300	-2.55171	1297	40	-1.72612	300	2
1	20530808	20531308	AT1G55030	+	220	1	20527888	20528388	AT1G55020	+	74	Yes	NA	2920	7	0.070444	700	-9.60933	1	2	0.070444	200	-1.33095	183	47	-4.24932	500	2
1	24778500	24779000	AT1G66430	+	409	1	24777518	24778018	AT1G66420	+	110	Yes	NA	982	9	0.070444	900	-13.964	0.222206	2	0.070444	200	-1.33091	314	76	-7.03235	700	-4
1	4466968	4467468	AT1G13110	+	362	1	4464503	4465003	AT1G13100	+	166	Yes	NA	2465	9	0.070444	900	-13.8722	0.236986	3	0.070444	300	-2.52835	402	181	-4.49247	600	4
1	19242190	19242690	AT1G51823	+	654	1	19240534	19241034	AT1G51820	+	60	Yes	NA	1656	7	0.070444	700	-9.66213	1	3	0.070444	300	-2.54713	639	47	-2.56105	400	2
2	10355040	10355540	AT2G24340	+	55	2	10349319	10349819	AT2G24330	+	610	NA	Yes	5721	7	0.070444	700	-9.68786	1	5	0.070444	500	-5.75353	46	736	-0.957515	200	2
2	14070426	14070926	AT2G33200	+	85	2	14068876	14069376	AT2G33190	+	441	NA	Yes	1550	7	0.070444	700	-9.58047	1	4	0.070444	400	-4.01271	68	483	-1.56059	300	2
2	18969341	18969841	AT2G46180	+	46	2	18959106	18959606	AT2G46140	+	1456	NA	Yes	10235	7	0.070444	700	-9.74922	1	3	0.070444	300	-2.54956	43	1305	-2.5695	400	2
3	4604880	4605380	AT3G13950	+	719	3	4596504	4597004	AT3G13930	+	28	Yes	NA	8376	7	0.070444	700	-10.0041	1	2	0.070444	200	-1.33099	678	35	-4.30526	500	2
1	7261001	7261501	AT1G20875	+	658	1	7257578	7258078	AT1G20860	+	967	NA	Yes	3423	28	0.070444	2800	-69.397	0	17	0.070444	1700	-34.6357	648	787	-4.2689	1100	26
1	6852540	6853040	AT1G19830	+	1282	1	6835910	6836410	AT1G19780	+	213	Yes	Yes	16630	8	0.070444	800	-11.5901	1	6	0.070444	600	-7.47	1316	250	-0.932193	200	4
2	17499506	17500006	AT2G41920	+	1719	2	17469043	17469543	AT2G41860	+	1733	Yes	Yes	30463	9	0.156041	406.302	-13.7141	0.267545	4	0.17076	165.013	-3.96577	1761	1875	-3.85242	241.289	4
2	6811020	6811520	AT2G15620	+	35	2	6802544	6803044	AT2G15590	+	898	NA	Yes	8476	6	0.070444	600	-7.74569	1	4	0.070444	400	-4.04044	44	756	-0.991512	200	2
2	11259972	11260472	AT2G26470	+	143	2	11247584	11248084	AT2G26440	+	688	NA	Yes	12388	7	0.070444	700	-9.50322	1	3	0.070444	300	-2.52948	154	706	-2.50189	400	2
1	11702489	11702989	AT1G32420	+	1718	1	11693443	11693943	AT1G32410	+	59	Yes	NA	9046	8	0.070444	800	-11.871	1	6	0.070444	600	-7.60166	1753	62	-0.932525	200	4
1	21952059	21952559	AT1G59725	+	273	1	21935389	21935889	AT1G59690	+	1668	Yes	Yes	16670	8	0.070444	800	-11.5675	1	3	0.070444	300	-2.52642	259	1764	-3.4225	500	4
3	3607531	3608031	AT3G11450	+	70	3	3599857	3600357	AT3G11435	+	648	NA	Yes	7674	9	0.070444	900	-14.1244	0.197602	2	0.070444	200	-1.33091	78	706	-7.0265	700	-4
1	5243518	5244018	AT1G15240	+	91	1	5237931	5238431	AT1G15215	+	641	NA	Yes	5587	7	0.070444	700	-9.56777	1	2	0.070444	200	-1.3309	106	630	-4.16404	500	2
1	23563421	23563921	AT1G63530	+	91	1	23560858	23561358	AT1G63520	+	303	NA	Yes	2563	7	0.070444	700	-9.56777	1	2	0.070444	200	-1.33091	75	258	-4.1914	500	2
2	17410994	17411494	AT2G41740	+	59	2	17406517	17407017	AT2G41720	+	1489	NA	Yes	4477	11	0.070444	1100	-19.2449	0.001564	3	0.070444	300	-2.54298	56	1564	-7.24308	800	-6
1	7574390	7574890	AT1G21610	+	464	1	7571027	7571527	AT1G21600	+	100	Yes	NA	3363	8	0.070444	800	-11.7089	1	1	0.070444	100	-0.455468	442	91	-9.56777	700	-4
1	27265541	27266041	AT1G72430	+	1231	1	27259498	27259998	AT1G72416	+	60	Yes	NA	6043	10	0.070444	1000	-16.6583	0.018226	5	0.070444	500	-5.73382	1096	53	-2.83925	500	6
1	852519	853019	AT1G03440	+	70	1	847008	847508	AT1G03410	+	497	NA	Yes	5511	7	0.070444	700	-9.62217	1	3	0.070444	300	-2.53619	82	635	-2.52391	400	2
1	843483	843983	AT1G03400	+	392	1	840068	840568	AT1G03380	+	90	Yes	NA	3415	10	0.070444	1000	-16.4323	0.022106	5	0.070444	500	-5.70427	448	69	-2.80065	500	6
1	1801469	1801969	AT1G05940	+	380	1	1797506	1798006	AT1G05920	+	145	Yes	NA	3963	10	0.070444	1000	-16.2677	0.025115	4	0.070444	400	-3.98587	285	149	-3.92363	600	6
1	27651037	27651537	AT1G73570	+	1543	1	27645036	27645536	AT1G73530	+	66	Yes	NA	6001	12	0.070444	1200	-21.8098	0.000135	5	0.070444	500	-5.70869	1734	66	-4.56917	700	8
2	167934	168434	AT2G01360	+	1296	2	159982	160482	AT2G01330	+	84	Yes	NA	7952	13	0.070444	1300	-24.3181	1.2e-05	4	0.070444	400	-4.00576	1278	79	-7.40164	900	-8
1	20091492	20091992	AT1G53820	+	1365	1	20080938	20081438	AT1G53790	+	1210	Yes	Yes	10554	17	0.086513	1384.24	-34.5481	0	13	0.096288	951.076	-23.5273	1363	1366	-2.22118	433.165	12
1	26725630	26726130	AT1G70890	+	1646	1	26705010	26705510	AT1G70810	+	567	Yes	NA	20620	7	0.070444	700	-9.42097	1	6	0.072355	584.154	-7.44149	1780	786	-0.932175	115.846	2
1	29083986	29084486	AT1G77390	+	99	1	29076417	29076917	AT1G77380	+	1727	NA	Yes	7569	22	0.070444	2200	-51.7416	0	14	0.070444	1400	-27.0061	94	1779	-3.35662	800	20
2	13410428	13410928	AT2G31480	+	1490	2	13403427	13403927	AT2G31450	+	121	Yes	NA	7001	19	0.070444	1900	-41.6344	0	5	0.070444	500	-5.67387	1391	101	-12.9973	1400	-16
2	17840060	17840560	AT2G42880	+	71	2	17831600	17832100	AT2G42850	+	1076	NA	Yes	8460	9	0.070444	900	-14.1181	0.198625	2	0.070444	200	-1.33091	88	1080	-7.00144	700	-4
3	2858019	2858519	AT3G09300	+	1041	3	2855998	2856498	AT3G09290	+	1232	Yes	Yes	2021	43	0.070444	4300	-123.35	0	43	0.096409	3141.92	-123.18	1300	1434	-3.6205	1158.08	48
2	15068959	15069459	AT2G35890	+	1571	2	15065040	15065540	AT2G35880	+	126	Yes	NA	3919	23	0.070444	2300	-54.5319	0	5	0.070444	500	-5.65726	1430	136	-18.9225	1800	-20
1	5294559	5295059	AT1G15390	+	105	1	5283354	5283854	AT1G15360	+	1042	NA	Yes	11205	6	0.070444	600	-7.52895	1	4	0.070444	400	-3.99378	110	1158	-0.991174	200	2
1	2888524	2889024	AT1G08990	+	1643	1	2882434	2882934	AT1G08970	+	92	Yes	NA	6090	9	0.070444	900	-14.0182	0.213892	4	0.070444	400	-4.0037	1794	83	-3.06276	500	4
1	26334926	26335426	AT1G69920	+	574	1	26326951	26327451	AT1G69900	+	750	Yes	Yes	7975	6	0.070444	600	-7.44637	1	4	0.070444	400	-3.96889	654	783	-0.991115	200	2
2	8603022	8603522	AT2G19920	+	64	2	8600488	8600988	AT2G19910	+	961	NA	Yes	2534	7	0.070444	700	-9.64458	1	4	0.070444	400	-4.06117	35	905	-1.58522	300	2
1	20439985	20440485	AT1G54780	+	667	1	20434543	20435043	AT1G54770	+	217	Yes	NA	5442	8	0.070444	800	-11.5882	1	2	0.070444	200	-1.3309	688	205	-5.44884	600	4
1	27995466	27995966	AT1G74490	+	459	1	27993956	27994456	AT1G74480	+	188	Yes	NA	1510	20	0.070444	2000	-44.2355	0	10	0.070444	1000	-16.1917	468	204	-5.14145	1000	16
1	23614481	23614981	AT1G63680	+	1523	1	23609447	23609947	AT1G63670	+	73	Yes	NA	5034	10	0.070444	1000	-16.5363	0.020297	4	0.070444	400	-4.00804	1614	75	-4.00593	600	6
1	29635407	29635907	AT1G78820	+	1469	1	29625569	29626069	AT1G78800	+	88	Yes	NA	9838	11	0.070444	1100	-18.9577	0.002023	3	0.070444	300	-2.53491	1684	90	-7.0697	800	-6
2	17479953	17480453	AT2G41890	+	93	2	17472523	17473023	AT2G41870	+	1030	NA	Yes	7430	6	0.070444	600	-7.5423	1	1	0.070444	100	-0.455843	103	1160	-5.67261	500	2
3	2894401	2894901	AT3G09405	+	186	3	2889554	2890054	AT3G09390	+	1070	Yes	Yes	4847	9	0.070444	900	-13.853	0.240366	4	0.070444	400	-3.98313	170	1378	-3.01563	500	4
1	10546928	10547428	AT1G30070	+	462	1	10545528	10546028	AT1G30060	+	61	Yes	NA	1400	7	0.070444	700	-9.65752	1	2	0.070444	200	-1.33096	533	41	-4.27286	500	2
1	20439986	20440486	AT1G54780	+	667	1	20437966	20438466	AT1G54775	+	88	Yes	NA	2020	13	0.070444	1300	-24.2777	1.3e-05	2	0.070444	200	-1.33091	688	79	-14.1249	1100	-8
2	10041932	10042432	AT2G23600	+	145	2	10024895	10025395	AT2G23540	+	1644	NA	Yes	17037	7	0.070444	700	-9.50168	1	6	0.070444	600	-7.49553	156	1844	-0.584334	100	2
2	15406069	15406569	AT2G36730	+	82	2	15390361	15390861	AT2G36710	+	656	NA	Yes	15708	6	0.070444	600	-7.55806	1	4	0.070444	400	-3.99682	100	625	-0.991187	200	2
1	895471	895971	AT1G03590	+	85	1	891488	891988	AT1G03560	+	607	Yes	Yes	3983	8	0.070444	800	-11.7494	1	1	0.070444	100	-0.455603	95	722	-9.56022	700	-4
2	6182010	6182510	AT2G14520	+	76	2	6167022	6167522	AT2G14500	+	834	NA	Yes	14988	6	0.070444	600	-7.56865	1	3	0.070444	300	-2.54154	60	824	-1.71294	300	2
2	14454499	14454999	AT2G34230	+	169	2	14446479	14446979	AT2G34210	+	1514	NA	Yes	8020	13	0.070444	1300	-23.8831	1.8e-05	8	0.070444	800	-11.6026	190	1616	-2.23258	500	8
1	4260480	4260980	AT1G12490	+	966	1	4247536	4248036	AT1G12460	+	64	Yes	NA	12944	8	0.070444	800	-11.8395	1	3	0.070444	300	-2.53656	1119	80	-3.48501	500	4
2	14520053	14520553	AT2G34410	+	28	2	14508170	14508670	AT2G34360	+	636	NA	Yes	11883	7	0.070444	700	-10.0041	1	0	0.070444	0	1.03489	15	692	1.03489	700	2
1	18221440	18221940	AT1G49250	+	750	1	18205998	18206498	AT1G49220	+	1726	Yes	Yes	15442	6	0.070444	600	-7.44212	1	2	0.070444	200	-1.33089	758	1576	-2.94857	400	2
1	12879368	12879868	AT1G35181	+	275	1	12877560	12878060	AT1G35180	+	269	Yes	NA	1808	11	0.070444	1100	-18.5873	0.002758	5	0.070444	500	-5.63609	246	319	-3.49492	600	6
1	28505985	28506485	AT1G75920	+	92	1	28498974	28499474	AT1G75900	+	834	NA	Yes	7011	6	0.070444	600	-7.54357	1	2	0.070444	200	-1.3309	105	806	-2.97754	400	2
1	22370939	22371439	AT1G60780	+	1683	1	22367533	22368033	AT1G60770	+	53	Yes	NA	3406	10	0.070444	1000	-16.7509	0.016733	5	0.070444	500	-5.87365	1717	26	-3.04372	500	6
1	18202089	18202589	AT1G49210	+	1404	1	18192110	18192610	AT1G49190	+	508	Yes	Yes	9979	9	0.070444	900	-13.7538	0.259596	3	0.070444	300	-2.52434	1469	484	-4.45354	600	4
1	22920098	22920598	AT1G62020	+	416	1	22914502	22915002	AT1G62000	+	58	Yes	NA	5596	6	0.070444	600	-7.61415	1	1	0.070444	100	-0.45418	402	65	-5.71025	500	2
1	20790430	20790930	AT1G55620	+	121	1	20783460	20783960	AT1G55610	+	722	NA	Yes	6970	8	0.070444	800	-11.6696	1	3	0.070444	300	-2.52953	153	673	-3.44138	500	4
1	7749558	7750058	AT1G22010	+	1102	1	7747496	7747996	AT1G22000	+	102	Yes	Yes	2062	15	0.070444	1500	-29.7833	0	6	0.070444	600	-7.56865	966	76	-6.06306	900	10
3	74404	74904	AT3G01220	+	944	3	59952	60452	AT3G01175	+	1122	Yes	Yes	14452	8	0.070444	800	-11.511	1	0	0.082106	0	1.00044	1143	1389	1.00044	800	4
2	17790509	17791009	AT2G42730	+	785	2	17783514	17784014	AT2G42710	+	110	Yes	NA	6995	8	0.070444	800	-11.6883	1	4	0.070444	400	-3.9935	806	111	-2.23654	400	4
2	15449523	15450023	AT2G36835	+	76	2	15440599	15441099	AT2G36815	+	548	NA	Yes	8924	8	0.070444	800	-11.7816	1	7	0.070444	700	-9.63285	67	660	-0.582381	100	4
2	19415026	19415526	AT2G47275	+	99	2	19387526	19388026	AT2G47230	+	1178	NA	Yes	27500	6	0.070444	600	-7.53521	1	2	0.070444	200	-1.3309	110	1354	-2.97598	400	2
1	26965433	26965933	AT1G71695	+	181	1	26945493	26945993	AT1G71680	+	1150	Yes	Yes	19940	9	0.070444	900	-13.8574	0.239566	1	0.070444	100	-0.457196	197	1187	-11.5985	800	-4
2	15107064	15107564	AT2G35960	+	821	2	15078995	15079495	AT2G35920	+	62	Yes	NA	28069	7	0.070444	700	-9.65306	1	1	0.070444	100	-0.454036	860	63	-7.59879	600	-2
1	24509516	24510016	AT1G65880	+	1112	1	24474055	24474555	AT1G65800	+	1882	NA	Yes	35461	6	0.10962	385.574	-7.43762	1	3	0.108139	195.427	-2.52305	1055	1982	-1.69012	190.147	2
1	21924231	21924731	AT1G59660	+	609	1	21910504	21911004	AT1G59640	+	176	Yes	NA	13727	7	0.070444	700	-9.48237	1	4	0.070444	400	-3.98166	705	184	-1.54582	300	2
2	1689083	1689583	AT2G04810	+	1183	2	1676503	1677003	AT2G04780	+	34	Yes	NA	12580	6	0.070444	600	-7.75577	1	4	0.070444	400	-4.03092	1041	50	-0.991419	200	2
3	4604464	4604964	AT3G13950	+	958	3	4600502	4601002	AT3G13940	+	72	Yes	NA	3962	17	0.070444	1700	-36.2828	0	8	0.070444	800	-11.7664	920	80	-5.23921	900	14
1	26408083	26408583	AT1G70110	+	1887	1	26386042	26386542	AT1G70060	+	81	Yes	NA	22041	7	0.070444	700	-9.59003	1	0	0	0	0	0	0	0	700	2
1	4663053	4663553	AT1G13609	+	399	1	4650917	4651417	AT1G13600	+	104	Yes	NA	12136	7	0.070444	700	-9.54541	1	3	0.070444	300	-2.53435	451	94	-2.5178	400	2
1	7261011	7261511	AT1G20875	+	658	1	7259009	7259509	AT1G20870	+	598	NA	Yes	2002	39	0.070444	3900	-108.81	0	16	0.070444	1600	-31.8319	648	484	-13.6088	2300	-42
2	12444462	12444962	AT2G28970	+	896	2	12433051	12433551	AT2G28950	+	1013	Yes	Yes	11411	7	0.070444	700	-9.41095	1	3	0.070444	300	-2.52353	734	1033	-2.48285	400	2
1	6852645	6853145	AT1G19830	+	1282	1	6838000	6838500	AT1G19790	+	158	Yes	Yes	14645	6	0.070444	600	-7.49466	1	2	0.070444	200	-1.3309	1316	157	-2.96624	400	2
1	27265475	27265975	AT1G72430	+	1231	1	27263557	27264057	AT1G72420	+	166	Yes	NA	1918	17	0.070444	1700	-35.2019	0	5	0.070444	500	-5.64325	1096	193	-9.8898	1200	-12
1	28690518	28691018	AT1G76470	+	44	1	28682538	28683038	AT1G76440	+	1153	NA	Yes	7980	6	0.070444	600	-7.67684	1	4	0.070444	400	-4.02825	52	1350	-0.991395	200	2
1	4663008	4663508	AT1G13609	+	399	1	4660653	4661153	AT1G13607	+	177	Yes	Yes	2355	6	0.070444	600	-7.48744	1	1	0.070444	100	-0.457181	451	195	-5.6429	500	2
2	19669038	19669538	AT2G48090	+	455	2	19665914	19666414	AT2G48080	+	414	Yes	Yes	3124	14	0.070444	1400	-26.3144	2e-06	6	0.070444	600	-7.46123	464	316	-4.80442	800	10
1	4663023	4663523	AT1G13609	+	399	1	4661870	4662370	AT1G13608	+	175	Yes	Yes	1153	8	0.070444	800	-11.6126	1	4	0.070444	400	-3.98023	451	200	-2.22043	400	4
1	29486510	29487010	AT1G78380	+	788	1	29484530	29485030	AT1G78370	+	1451	Yes	Yes	1980	51	0.070444	5100	-154.981	0	30	0.070444	3000	-76.1463	791	1512	-7.83142	2100	-60
1	29703415	29703915	AT1G78970	+	370	1	29693958	29694458	AT1G78955	+	551	Yes	Yes	9457	10	0.070444	1000	-16.1093	0.02856	3	0.070444	300	-2.5256	317	582	-5.62312	700	6
1	843458	843958	AT1G03400	+	392	1	841061	841561	AT1G03390	+	62	Yes	NA	2397	11	0.070444	1100	-19.2018	0.001629	6	0.070444	600	-7.60166	448	62	-2.61138	500	6
1	1801486	1801986	AT1G05940	+	380	1	1800523	1801023	AT1G05930	+	108	Yes	NA	963	15	0.070444	1500	-29.7277	0	3	0.070444	300	-2.53619	285	82	-13.3355	1200	-10
1	4869024	4869524	AT1G14250	+	948	1	4866523	4867023	AT1G14240	+	114	Yes	Yes	2501	19	0.070444	1900	-41.7225	0	4	0.070444	400	-4.00687	1186	77	-16.5631	1500	-16
1	27651057	27651557	AT1G73570	+	1543	1	27646431	27646931	AT1G73540	+	94	Yes	NA	4626	12	0.070444	1200	-21.5271	0.000174	5	0.070444	500	-5.672	1734	104	-4.46054	700	8
1	10381551	10382051	AT1G29690	+	1345	1	10371920	10372420	AT1G29660	+	841	Yes	Yes	9631	11	0.070444	1100	-18.4702	0.003044	3	0.070444	300	-2.52351	1406	746	-6.83994	800	6
2	15480567	15481067	AT2G36880	+	95	2	15474603	15475103	AT2G36870	+	1003	NA	Yes	5964	12	0.070444	1200	-21.5202	0.000175	8	0.070444	800	-11.6666	123	1005	-1.72976	400	8
3	911103	911603	AT3G03690	+	42	3	902379	902879	AT3G03670	+	1302	NA	Yes	8724	6	0.070444	600	-7.68942	1	3	0.070444	300	-2.55951	32	1311	-1.73656	300	2
1	17000045	17000545	AT1G44960	+	736	1	16994576	16995076	AT1G44940	+	491	Yes	Yes	5469	11	0.070444	1100	-18.5092	0.002949	4	0.070444	400	-3.97127	442	471	-4.8492	700	6
1	24032456	24032956	AT1G64670	+	756	1	24026003	24026503	AT1G64650	+	146	Yes	NA	6453	6	0.070444	600	-7.50021	1	2	0.070444	200	-1.3309	750	193	-2.96204	400	2
1	7901046	7901546	AT1G22380	+	860	1	7886875	7887375	AT1G22330	+	305	Yes	Yes	14171	6	0.070444	600	-7.46243	1	2	0.070444	200	-1.33089	1007	239	-2.95854	400	2
1	6297409	6297909	AT1G18290	+	828	1	6290526	6291026	AT1G18270	+	54	Yes	NA	6883	11	0.070444	1100	-19.3284	0.001445	1	0.070444	100	-0.451161	898	39	-17.0473	1000	-6
3	67018	67518	AT3G01190	+	201	3	60010	60510	AT3G01175	+	1122	NA	Yes	7008	8	0.070444	800	-11.5963	1	3	0.070444	300	-2.52746	210	1389	-3.42881	500	4
1	26725552	26726052	AT1G70890	+	1646	1	26705947	26706447	AT1G70820	+	885	Yes	Yes	19605	6	0.076302	553.935	-7.44001	1	2	0.110466	127.54	-1.33089	1780	1200	-5.61756	426.395	2
2	13409487	13409987	AT2G31480	+	214	2	13405392	13405892	AT2G31460	+	1887	Yes	Yes	4095	27	0.070444	2700	-67.114	0	15	0.070444	1500	-29.4194	162	2000	-5.50437	1200	26
3	3480035	3480535	AT3G11110	+	1635	3	3459966	3460466	AT3G11040	+	66	Yes	NA	20069	6	0.070444	600	-7.59074	1	2	0.070444	200	-1.33092	2009	73	-2.99279	400	2
1	22810483	22810983	AT1G61770	+	69	1	22805445	22805945	AT1G61750	+	659	NA	Yes	5038	6	0.070444	600	-7.58342	1	3	0.070444	300	-2.53755	75	741	-1.70789	300	2
1	26397005	26397505	AT1G70080	+	1889	1	26384034	26384534	AT1G70060	+	34	Yes	NA	12971	6	0.070444	600	-7.75577	1	0	0	0	0	0	0	0	600	2
2	8663023	8663523	AT2G20080	+	118	2	8662080	8662580	AT2G20070	+	1394	NA	Yes	943	56	0.070444	5600	-188.65	0	29	0.070444	2900	-77.0578	89	1503	-16.5789	2700	-74
2	11206015	11206515	AT2G26320	+	78	2	11201102	11201602	AT2G26310	+	1025	NA	Yes	4913	10	0.070444	1000	-16.5008	0.020903	5	0.070444	500	-5.71025	65	926	-2.80834	500	6
1	10877013	10877513	AT1G30660	+	862	1	10868483	10868983	AT1G30650	+	692	Yes	Yes	8530	8	0.070444	800	-11.5193	1	5	0.070444	500	-5.61993	1051	657	-1.43861	300	4
1	26335095	26335595	AT1G69920	+	574	1	26330485	26330985	AT1G69910	+	107	Yes	NA	4610	9	0.070444	900	-13.9717	0.221028	3	0.070444	300	-2.53074	654	132	-4.51613	600	4
1	25255158	25255658	AT1G67420	+	1135	1	25252507	25253007	AT1G67410	+	190	Yes	NA	2651	18	0.070444	1800	-38.0853	0	5	0.070444	500	-5.64145	1446	204	-11.1746	1300	-14
1	29635373	29635873	AT1G78820	+	1469	1	29629064	29629564	AT1G78810	+	45	Yes	NA	6309	10	0.070444	1000	-16.8954	0.014569	4	0.070444	400	-4.05833	1684	36	-4.20911	600	6
2	14689580	14690080	AT2G34820	+	822	2	14681958	14682458	AT2G34800	+	140	Yes	NA	7622	9	0.070444	900	-13.9054	0.231404	8	0.070444	800	-11.5952	978	203	-0.598105	100	4
1	247486	247986	AT1G01680	+	986	1	232629	233129	AT1G01650	+	83	Yes	NA	14857	7	0.070444	700	-9.58513	1	3	0.070444	300	-2.53462	1047	92	-2.51871	400	2
1	26429975	26430475	AT1G70185	+	112	1	26420493	26420993	AT1G70160	+	1445	NA	Yes	9482	6	0.070444	600	-7.52252	1	3	0.070444	300	-2.53068	133	1574	-1.69935	300	2
1	29635426	29635926	AT1G78820	+	1469	1	29632082	29632582	AT1G78815	+	103	Yes	NA	3344	16	0.070444	1600	-32.6977	0	7	0.070444	700	-9.54541	1684	104	-5.48485	900	12
2	13729519	13730019	AT2G32320	+	319	2	13723052	13723552	AT2G32300	+	1128	Yes	Yes	6467	11	0.070444	1100	-18.5601	0.002824	2	0.070444	200	-1.3309	212	1170	-10.1146	900	-6
2	6181888	6182388	AT2G14520	+	76	2	6174064	6174564	AT2G14510	+	938	NA	Yes	7824	9	0.070444	900	-14.089	0.203107	7	0.070444	700	-9.66213	60	882	-0.913557	200	4
1	49036	49536	AT1G01090	+	107	1	40546	41046	AT1G01070	+	562	NA	Yes	8490	6	0.070444	600	-7.52703	1	1	0.070444	100	-0.456023	110	621	-5.66857	500	2
1	4261029	4261529	AT1G12490	+	576	1	4256039	4256539	AT1G12470	+	67	Yes	NA	4990	9	0.070444	900	-14.1446	0.194473	3	0.070444	300	-2.54298	624	56	-4.64164	600	4
1	18220570	18221070	AT1G49250	+	1048	1	18209957	18210457	AT1G49230	+	108	Yes	NA	10613	6	0.070444	600	-7.52609	1	3	0.070444	300	-2.53462	1055	92	-1.70423	300	2
1	10193592	10194092	AT1G29170	+	964	1	10177941	10178441	AT1G29120	+	59	Yes	NA	15651	6	0.070444	600	-7.61086	1	3	0.070444	300	-2.53919	857	68	-1.70995	300	2
3	5025413	5025913	AT3G14940	+	1184	3	5021467	5021967	AT3G14930	+	24	Yes	NA	3946	7	0.070444	700	-10.1201	1	2	0.070444	200	-1.33164	1351	13	-4.76239	500	2
1	9388707	9389207	AT1G27040	+	526	1	9379972	9380472	AT1G27020	+	58	Yes	NA	8735	6	0.070444	600	-7.61415	1	2	0.070444	200	-1.33096	419	43	-3.02912	400	2
1	28504023	28504523	AT1G75920	+	98	1	28501508	28502008	AT1G75910	+	1209	NA	Yes	2515	19	0.070444	1900	-41.9751	0	5	0.070444	500	-5.72482	57	1274	-13.8012	1400	-16
1	24039510	24040010	AT1G64700	+	95	1	24029606	24030106	AT1G64660	+	1625	Yes	Yes	9904	6	0.070444	600	-7.53983	1	2	0.070444	200	-1.33091	76	1730	-2.9908	400	2
3	9029	9529	AT3G01040	+	1254	3	6921	7421	AT3G01030	+	58	Yes	NA	2108	25	0.070444	2500	-64.6643	0	13	0.070444	1300	-24.7546	1481	57	-6.9894	1200	-24
1	6241004	6241504	AT1G18140	+	613	1	6238042	6238542	AT1G18130	+	75	Yes	NA	2962	10	0.070444	1000	-16.5215	0.02055	8	0.070444	800	-11.7288	774	92	-0.898067	200	6
2	7915488	7915988	AT2G18190	+	791	2	7888485	7888985	AT2G18140	+	1518	Yes	Yes	27003	7	0.070444	700	-9.41324	1	4	0.071814	392.373	-3.96783	832	1669	-2.20572	307.627	2
1	21385422	21385922	AT1G57750	+	892	1	21378506	21379006	AT1G57720	+	131	Yes	NA	6916	11	0.070444	1100	-18.7739	0.002355	3	0.070444	300	-2.53012	879	142	-6.97115	800	-6
2	14557530	14558030	AT2G34555	+	1791	2	14539039	14539539	AT2G34500	+	66	Yes	NA	18491	6	0.070444	600	-7.59074	1	1	0.070444	100	-0.454379	1908	68	-5.7057	500	2
1	22920453	22920953	AT1G62020	+	719	1	22916002	22916502	AT1G62010	+	152	Yes	NA	4451	12	0.070444	1200	-21.2834	0.000215	4	0.070444	400	-3.98474	613	157	-6.01212	800	8
2	13434892	13435392	AT2G31550	+	867	2	13415012	13415512	AT2G31500	+	126	Yes	NA	19880	6	0.070444	600	-7.51185	1	5	0.070444	500	-5.66274	995	122	-0.574145	100	2
1	3234967	3235467	AT1G09935	+	93	1	3224091	3224591	AT1G09910	+	1410	NA	Yes	10876	7	0.070444	700	-9.56391	1	3	0.070444	300	-2.53714	77	1406	-2.52705	400	2
2	15075895	15076395	AT2G35920	+	96	2	15068456	15068956	AT2G35890	+	1212	NA	Yes	7439	6	0.070444	600	-7.53864	1	2	0.070444	200	-1.3309	104	1353	-2.97787	400	2
2	19221923	19222423	AT2G46770	+	136	2	19207327	19207827	AT2G46740	+	1026	NA	Yes	14596	6	0.070444	600	-7.50559	1	3	0.070444	300	-2.52924	159	1005	-1.69759	300	2
2	15107378	15107878	AT2G35960	+	1743	2	15083468	15083968	AT2G35930	+	124	Yes	NA	23910	15	0.070444	1500	-29.607	0	0	0	0	0	0	0	0	1500	10
1	26964057	26964557	AT1G71695	+	1013	1	26948487	26948987	AT1G71690	+	186	Yes	NA	15570	6	0.070444	600	-7.48454	1	2	0.070444	200	-1.3309	1304	207	-2.96081	400	2
2	10432403	10432903	AT2G24560	+	1049	2	10422502	10423002	AT2G24530	+	53	Yes	NA	9901	6	0.070444	600	-7.63255	1	2	0.070444	200	-1.33092	1083	74	-2.99211	400	2
1	24594809	24595309	AT1G66060	+	486	1	24585904	24586404	AT1G66040	+	969	NA	Yes	8905	9	0.070444	900	-13.7564	0.259116	5	0.070444	500	-5.62263	513	1093	-2.02233	400	4
1	26964033	26964533	AT1G71695	+	1013	1	26952522	26953022	AT1G71692	+	73	Yes	NA	11511	6	0.070444	600	-7.57462	1	4	0.070444	400	-4.00687	1304	77	-0.991239	200	2
1	21929044	21929544	AT1G59660	+	778	1	21920542	21921042	AT1G59650	+	172	Yes	NA	8502	9	0.070444	900	-13.866	0.238092	3	0.070444	300	-2.52749	729	209	-4.48404	600	4
2	17110627	17111127	AT2G41997	+	585	2	17109088	17109588	AT2G40995	+	663	Yes	Yes	1539	34	0.070444	3400	-90.474	0	21	0.070444	2100	-46.6372	635	656	-4.80129	1300	34
2	1689068	1689568	AT2G04810	+	1183	2	1680038	1680538	AT2G04790	+	37	Yes	NA	9030	6	0.070444	600	-7.72728	1	3	0.070444	300	-2.56078	1041	31	-1.73829	300	2
1	23844502	23845002	AT1G64255	+	1440	1	23831523	23832023	AT1G64210	+	82	Yes	NA	12979	6	0.070444	600	-7.55806	1	4	0.070444	400	-4.00054	1814	90	-0.991204	200	2
1	3061028	3061528	AT1G09483	+	1637	1	3059080	3059580	AT1G09480	+	144	Yes	NA	1948	48	0.070444	4800	-150.202	0	32	0.070444	3200	-86.707	1714	123	-6.2124	1600	58
2	17499533	17500033	AT2G41920	+	1719	2	17477012	17477512	AT2G41880	+	85	Yes	NA	22521	6	0.070444	600	-7.55334	1	2	0.070444	200	-1.33091	1761	100	-2.97926	400	2
2	608383	608883	AT2G02310	+	37	2	604434	604934	AT2G02290	+	1189	NA	Yes	3949	10	0.070444	1000	-17.1103	0.011798	4	0.070444	400	-4.14134	20	1112	-4.60699	600	6
1	19744959	19745459	AT1G53000	+	139	1	19743083	19743583	AT1G52990	+	822	NA	Yes	1876	15	0.070444	1500	-29.5201	0	8	0.070444	800	-11.6581	129	660	-3.52086	700	10
2	1689027	1689527	AT2G04810	+	1183	2	1683091	1683591	AT2G04795	+	53	Yes	NA	5936	6	0.070444	600	-7.63255	1	4	0.070444	400	-4.01059	1041	71	-0.991261	200	2
2	11259519	11260019	AT2G26470	+	110	2	11257425	11257925	AT2G26460	+	350	NA	Yes	2094	11	0.070444	1100	-18.845	0.002221	2	0.070444	200	-1.33091	94	272	-10.2971	900	-6
2	18166505	18167005	AT2G43870	+	112	2	18158461	18158961	AT2G43840	+	400	NA	Yes	8044	6	0.070444	600	-7.52252	1	5	0.070444	500	-5.65557	141	384	-0.575044	100	2
1	24418473	24418973	AT1G65660	+	119	1	24412575	24413075	AT1G65640	+	844	NA	Yes	5898	8	0.070444	800	-11.6727	1	7	0.070444	700	-9.50727	138	796	-0.590267	100	4
1	11528035	11528535	AT1G32050	+	71	1	11514487	11514987	AT1G32030	+	886	NA	Yes	13548	6	0.070444	600	-7.57889	1	4	0.070444	400	-4.01271	68	831	-0.991275	200	2
2	265563	266063	AT2G01580	+	223	2	236562	237062	AT2G01520	+	1226	NA	Yes	29001	8	0.070444	800	-11.5855	1	0	0.070444	0	1.00324	155	1157	1.00324	800	4
2	17238532	17239032	AT2G41370	+	165	2	17228927	17229427	AT2G41340	+	1611	Yes	Yes	9605	6	0.070444	600	-7.49181	1	4	0.070444	400	-3.98474	157	1815	-0.991143	200	2
1	10568608	10569108	AT1G30100	+	50	1	10552329	10552829	AT1G30080	+	1037	NA	Yes	16279	6	0.070444	600	-7.64545	1	2	0.070444	200	-1.33095	46	975	-3.02322	400	2
2	17990457	17990957	AT2G43280	+	944	2	17984521	17985021	AT2G43260	+	131	Yes	NA	5936	6	0.070444	600	-7.5086	1	2	0.070444	200	-1.3309	693	168	-2.96477	400	2
1	24172550	24173050	AT1G65070	+	71	1	24170504	24171004	AT1G65060	+	830	NA	Yes	2046	12	0.070444	1200	-21.7417	0.000144	5	0.070444	500	-5.72079	59	841	-4.60638	700	8
1	11170875	11171375	AT1G31258	+	213	1	11166578	11167078	AT1G31250	+	1016	NA	Yes	4297	6	0.070444	600	-7.47733	1	1	0.070444	100	-0.457363	222	1205	-5.63891	500	2
1	27651854	27652354	AT1G73570	+	1433	1	27648008	27648508	AT1G73550	+	174	Yes	NA	3846	17	0.070444	1700	-35.166	0	11	0.070444	1100	-18.6771	1678	178	-2.45558	600	12
3	278976	279476	AT3G01780	+	158	3	273933	274433	AT3G01760	+	1175	NA	Yes	5043	18	0.070444	1800	-38.2426	0	11	0.070444	1100	-18.6756	179	1185	-2.99176	700	14
1	10379955	10380455	AT1G29690	+	223	1	10376012	10376512	AT1G29670	+	788	Yes	Yes	3943	10	0.070444	1000	-16.176	0.027019	3	0.070444	300	-2.52774	200	671	-5.65377	700	6
1	19286959	19287459	AT1G51910	+	456	1	19277628	19278128	AT1G51890	+	463	Yes	Yes	9331	6	0.070444	600	-7.45107	1	1	0.070444	100	-0.457972	414	460	-5.62559	500	2
1	9447985	9448485	AT1G27190	+	109	1	9434041	9434541	AT1G27170	+	1614	NA	Yes	13944	10	0.070444	1000	-16.356	0.023462	8	0.070444	800	-11.7184	96	1647	-0.898047	200	6
1	24030951	24031451	AT1G64670	+	503	1	24029811	24030311	AT1G64660	+	356	Yes	Yes	1140	19	0.070444	1900	-40.7282	0	5	0.070444	500	-5.63114	485	304	-12.3975	1400	-16
2	15973509	15974009	AT2G38120	+	55	2	15954930	15955430	AT2G38110	+	1474	NA	Yes	18579	8	0.070444	800	-11.9006	1	5	0.070444	500	-5.71353	63	1546	-1.46291	300	4
3	68012	68512	AT3G01190	+	180	3	65163	65663	AT3G01180	+	877	NA	Yes	2849	10	0.070444	1000	-16.2165	0.026157	6	0.070444	600	-7.50923	130	981	-1.91167	400	6
1	7899974	7900474	AT1G22380	+	1225	1	7890966	7891466	AT1G22340	+	85	Yes	NA	9008	6	0.070444	600	-7.55334	1	3	0.070444	300	-2.53755	1297	75	-1.70789	300	2
1	6297086	6297586	AT1G18290	+	218	1	6294459	6294959	AT1G18280	+	706	Yes	Yes	2627	15	0.070444	1500	-29.2653	0	6	0.070444	600	-7.48611	181	651	-5.79308	900	10
3	2575056	2575556	AT3G08490	+	939	3	2553031	2553531	AT3G07990	+	1189	Yes	Yes	22025	6	0.070444	600	-7.43934	1	1	0.070444	100	-0.45838	985	1086	-5.61673	500	2
3	3054127	3054627	AT3G09930	+	1457	3	3050963	3051463	AT3G09922	+	64	Yes	NA	3164	11	0.070444	1100	-19.1755	0.001669	4	0.070444	400	-4.07841	1721	30	-5.48125	700	6
1	26725600	26726100	AT1G70890	+	1646	1	26710541	26711041	AT1G70830	+	1329	Yes	Yes	15059	12	0.114583	737.747	-20.9495	0.000289	10	0.12455	565.589	-16.0369	1780	1353	-1.51928	172.158	8
1	25649912	25650412	AT1G68410	+	184	1	25647541	25648041	AT1G68400	+	236	NA	Yes	2371	7	0.070444	700	-9.47846	1	2	0.070444	200	-1.3309	161	226	-4.14193	500	2
2	13410927	13411427	AT2G31480	+	187	2	13407530	13408030	AT2G31470	+	766	Yes	Yes	3397	10	0.070444	1000	-16.2086	0.026323	2	0.070444	200	-1.3309	156	615	-8.4885	800	-6
3	3480046	3480546	AT3G11110	+	1635	3	3463479	3463979	AT3G11050	+	97	Yes	NA	16567	6	0.070444	600	-7.53747	1	5	0.070444	500	-5.67725	2009	96	-0.572325	100	2
2	11269968	11270468	AT2G26500	+	59	2	11258051	11258551	AT2G26460	+	1298	NA	Yes	11917	6	0.070444	600	-7.61086	1	4	0.070444	400	-4.00576	79	1449	-0.991232	200	2
2	7669496	7669996	AT2G17640	+	1210	2	7655889	7656389	AT2G17600	+	45	Yes	NA	13607	6	0.070444	600	-7.67099	1	4	0.070444	400	-4.02699	954	53	-0.991384	200	2
2	14840469	14840969	AT2G35220	+	55	2	14836937	14837437	AT2G35210	+	610	NA	Yes	3532	7	0.070444	700	-9.68786	1	5	0.070444	500	-5.72695	56	623	-0.957343	200	2
1	26396454	26396954	AT1G70080	+	848	1	26393579	26394079	AT1G70070	+	71	Yes	NA	2875	7	0.070444	700	-9.61882	1	2	0.070444	200	-1.33106	946	27	-4.37378	500	2
2	17260055	17260555	AT2G41400	+	112	2	17228954	17229454	AT2G41340	+	1611	NA	Yes	31101	8	0.070444	800	-11.6846	1	3	0.070444	300	-2.53109	127	1815	-3.45098	500	4
2	19696028	19696528	AT2G48160	+	668	2	19685429	19685929	AT2G48130	+	288	Yes	NA	10599	7	0.070444	700	-9.44757	1	2	0.070444	200	-1.3309	672	182	-4.13707	500	2
3	1222499	1222999	AT3G04530	+	635	3	1218485	1218985	AT3G04520	+	286	Yes	Yes	4014	12	0.070444	1200	-21.1045	0.000252	2	0.070444	200	-1.3309	687	155	-11.9431	1000	-8
1	24359883	24360383	AT1G65510	+	374	1	24357372	24357872	AT1G65500	+	632	Yes	Yes	2511	10	0.070444	1000	-16.1082	0.028586	1	0.070444	100	-0.457751	315	751	-13.7887	900	-6
1	5294935	5295435	AT1G15390	+	67	1	5293013	5293513	AT1G15385	+	700	NA	Yes	1922	10	0.070444	1000	-16.5863	0.019439	6	0.070444	600	-7.53983	95	796	-1.92463	400	6
2	273481	273981	AT2G01610	+	49	2	240038	240538	AT2G01530	+	1793	NA	Yes	33443	7	0.070444	700	-9.72611	1	0	0	0	0	0	0	0	700	2
1	29517045	29517545	AT1G78450	+	210	1	29504987	29505487	AT1G78420	+	841	NA	Yes	12058	6	0.070444	600	-7.47804	1	1	0.070444	100	-0.457386	226	938	-5.6384	500	2
2	17995959	17996459	AT2G43310	+	118	2	17988535	17989035	AT2G43270	+	1397	NA	Yes	7424	12	0.070444	1200	-21.396	0.000195	8	0.070444	800	-11.6712	120	1249	-1.73077	400	8
2	120014	120514	AT2G01210	+	572	2	118514	119014	AT2G01200	+	183	Yes	NA	1500	16	0.070444	1600	-32.2067	0	5	0.070444	500	-5.65726	406	136	-8.76039	1100	-12
1	4261484	4261984	AT1G12490	+	1307	1	4258577	4259077	AT1G12480	+	36	Yes	NA	2907	10	0.070444	1000	-17.1447	0.011402	2	0.070444	200	-1.3311	1429	24	-9.44261	800	-6
1	20055926	20056426	AT1G53710	+	1551	1	20048549	20049049	AT1G53700	+	1071	Yes	Yes	7377	39	0.087009	3157.51	-108.272	0	32	0.10833	2080.88	-82.9066	1692	1238	-4.81918	1076.62	42
2	1017045	1017545	AT2G03340	+	76	2	1005833	1006333	AT2G03310	+	592	NA	Yes	11212	6	0.070444	600	-7.56865	1	3	0.070444	300	-2.53602	83	477	-1.70597	300	2
1	18220638	18221138	AT1G49250	+	1048	1	18217962	18218462	AT1G49240	+	61	Yes	NA	2676	6	0.070444	600	-7.60462	1	2	0.070444	200	-1.33093	1055	60	-3.00386	400	2
2	16233500	16234000	AT2G38860	+	244	2	16228720	16229220	AT2G38840	+	465	Yes	Yes	4780	8	0.070444	800	-11.577	1	2	0.070444	200	-1.33089	243	540	-5.44049	600	4
1	18988359	18988859	AT1G51210	+	857	1	18985527	18986027	AT1G51200	+	85	Yes	NA	2832	7	0.070444	700	-9.58047	1	2	0.070444	200	-1.33092	835	74	-4.19268	500	2
1	9388684	9389184	AT1G27040	+	526	1	9382137	9382637	AT1G27030	+	70	Yes	NA	6547	6	0.070444	600	-7.58112	1	1	0.070444	100	-0.454618	419	72	-5.70024	500	2
1	24932556	24933056	AT1G66830	+	165	1	24906930	24907430	AT1G66770	+	1385	NA	Yes	25626	6	0.070444	600	-7.49181	1	1	0.070444	100	-0.456678	146	1394	-5.654	500	2
2	7051463	7051963	AT2G16280	+	37	2	7037943	7038443	AT2G16230	+	1331	NA	Yes	13520	6	0.070444	600	-7.72728	1	1	0.070444	100	-0.452578	48	1183	-5.74729	500	2
1	24039475	24039975	AT1G64700	+	95	1	24033334	24033834	AT1G64670	+	1090	Yes	Yes	6141	6	0.070444	600	-7.53983	1	1	0.070444	100	-0.454833	76	1404	-5.69537	500	2
1	6495968	6496468	AT1G18835	+	1252	1	6487010	6487510	AT1G18810	+	38	Yes	NA	8958	6	0.070444	600	-7.71885	1	5	0.070444	500	-5.74156	1297	50	-0.564224	100	2
2	17711501	17712001	AT2G42540	+	552	2	17684121	17684621	AT2G42470	+	1365	Yes	Yes	27380	6	0.070444	600	-7.4471	1	3	0.070444	300	-2.52373	650	1187	-1.69093	300	2
2	14557591	14558091	AT2G34555	+	1791	2	14543946	14544446	AT2G34510	+	53	Yes	NA	13645	6	0.070444	600	-7.63255	1	3	0.070444	300	-2.54121	1908	61	-1.71252	300	2
2	7914044	7914544	AT2G18190	+	571	2	7892924	7893424	AT2G18150	+	1246	Yes	Yes	21120	6	0.070444	600	-7.44647	1	2	0.070444	200	-1.33089	684	1173	-2.94906	400	2
1	20055878	20056378	AT1G53710	+	1551	1	20052527	20053027	AT1G53708	+	121	Yes	NA	3351	29	0.070444	2900	-75.6497	0	12	0.070444	1200	-21.4943	1692	99	-11.3163	1700	-28
2	13434405	13434905	AT2G31550	+	1203	2	13421006	13421506	AT2G31510	+	112	Yes	NA	13399	9	0.070444	900	-13.9591	0.222964	8	0.070444	800	-11.6272	1215	157	-0.596562	100	4
3	3977459	3977959	AT3G12545	+	244	3	3973896	3974396	AT3G12530	+	785	NA	Yes	3563	13	0.070444	1300	-23.7562	2e-05	11	0.070444	1100	-18.6118	236	957	-0.86581	200	8
1	20090407	20090907	AT1G53815	+	1299	1	20082055	20082555	AT1G53800	+	66	Yes	Yes	8352	7	0.070444	700	-9.63664	1	1	0.070444	100	-0.451161	1159	39	-7.71089	600	-2
2	15107430	15107930	AT2G35960	+	1743	2	15088441	15088941	AT2G35940	+	145	Yes	Yes	18989	7	0.070444	700	-9.50168	1	0	0	0	0	0	0	0	700	2
1	26416555	26417055	AT1G70150	+	145	1	26408088	26408588	AT1G70110	+	1887	NA	Yes	8467	11	0.070444	1100	-18.7383	0.002425	0	0	0	0	0	0	0	1100	6
1	24017920	24018420	AT1G64625	+	131	1	24007368	24007868	AT1G64620	+	1284	NA	Yes	10552	7	0.070444	700	-9.51347	1	4	0.070444	400	-3.99297	113	1300	-1.55112	300	2
1	23727925	23728425	AT1G63930	+	94	1	23711576	23712076	AT1G63870	+	1182	NA	Yes	16349	6	0.070444	600	-7.54105	1	2	0.070444	200	-1.33091	86	1251	-2.98518	400	2
2	10432472	10432972	AT2G24560	+	1049	2	10425515	10426015	AT2G24545	+	54	Yes	NA	6957	7	0.070444	700	-9.69361	1	3	0.070444	300	-2.53945	1083	67	-2.5348	400	2
2	17499460	17499960	AT2G41920	+	1719	2	17479022	17479522	AT2G41890	+	99	Yes	NA	20438	6	0.070444	600	-7.53521	1	0	0.070444	0	1.00433	1761	116	1.00433	600	2
1	23633069	23633569	AT1G63710	+	121	1	23618043	23618543	AT1G63690	+	714	NA	Yes	15026	6	0.070444	600	-7.51537	1	4	0.070444	400	-3.988	136	756	-0.991153	200	2
1	20454904	20455404	AT1G54850	+	51	1	20451561	20452061	AT1G54830	+	1249	NA	Yes	3343	8	0.070444	800	-11.9351	1	3	0.070444	300	-2.5442	53	1492	-3.53407	500	4
2	13017523	13018023	AT2G30560	+	750	2	13010420	13010920	AT2G30530	+	598	Yes	NA	7103	6	0.070444	600	-7.44565	1	3	0.070444	300	-2.52505	593	373	-1.69251	300	2
1	8398997	8399497	AT1G23740	+	124	1	8396415	8396915	AT1G23730	+	544	NA	Yes	2582	16	0.070444	1600	-32.5043	0	6	0.070444	600	-7.52083	114	411	-6.93334	1000	-12
2	265454	265954	AT2G01580	+	223	2	240037	240537	AT2G01530	+	1793	NA	Yes	25417	6	0.070444	600	-7.47511	1	0	0	0	0	0	0	0	600	2
1	7435002	7435502	AT1G21240	+	592	1	7430021	7430521	AT1G21230	+	587	Yes	Yes	4981	19	0.070444	1900	-40.5532	0	7	0.070444	700	-9.42266	573	534	-8.03462	1200	-14
1	1722027	1722527	AT1G05750	+	1601	1	1708051	1708551	AT1G05690	+	151	Yes	Yes	13976	8	0.070444	800	-11.6328	1	3	0.070444	300	-2.53055	1644	135	-3.44762	500	4
2	17990478	17990978	AT2G43280	+	944	2	17988536	17989036	AT2G43270	+	1397	Yes	Yes	1942	37	0.070444	3700	-100.981	0	13	0.070444	1300	-23.575	693	1249	-16.3404	2400	-38
1	1648553	1649053	AT1G05570	+	71	1	1643908	1644408	AT1G05550	+	988	NA	Yes	4645	7	0.070444	700	-9.61882	1	6	0.070444	600	-7.58823	67	1274	-0.576438	100	2
1	10381466	10381966	AT1G29690	+	1345	1	10378500	10379000	AT1G29680	+	1373	Yes	Yes	2966	57	0.096729	4151.1	-178.541	0	37	0.106961	2436.81	-100.757	1406	1471	-9.11641	1714.29	-70
1	9447972	9448472	AT1G27190	+	109	1	9440910	9441410	AT1G27180	+	692	NA	Yes	7062	14	0.070444	1400	-26.8783	1e-06	8	0.070444	800	-11.7184	96	852	-2.89063	600	10
3	5535131	5535631	AT3G16330	+	1178	3	5531028	5531528	AT3G16320	+	66	Yes	NA	4103	16	0.070444	1600	-33.3691	0	4	0.070444	400	-4.01128	1055	70	-11.7282	1200	-12
1	19126508	19127008	AT1G51580	+	719	1	19113060	19113560	AT1G51538	+	921	Yes	Yes	13448	7	0.070444	700	-9.41519	1	3	0.070444	300	-2.52333	841	929	-2.48222	400	2
1	3882990	3883490	AT1G11570	+	864	1	3876475	3876975	AT1G11540	+	202	Yes	NA	6515	8	0.070444	800	-11.5957	1	5	0.070444	500	-5.64161	847	203	-1.44403	300	4
1	18889981	18890481	AT1G50960	+	958	1	18881449	18881949	AT1G50950	+	55	Yes	NA	8532	7	0.070444	700	-9.68786	1	1	0.070444	100	-0.453883	915	61	-7.60462	600	-2
2	15049116	15049616	AT2G35810	+	1565	2	15045005	15045505	AT2G35800	+	68	Yes	NA	4111	14	0.070444	1400	-27.373	1e-06	2	0.070444	200	-1.33095	1645	47	-16.7369	1200	-10
2	16631561	16632061	AT2G39850	+	593	2	16618498	16618998	AT2G39820	+	1485	Yes	Yes	13063	9	0.070444	900	-13.7457	0.261044	8	0.070444	800	-11.5196	687	1292	-0.60174	100	4
1	3883496	3883996	AT1G11570	+	1345	1	3879976	3880476	AT1G11545	+	1211	Yes	Yes	3520	20	0.085316	1651.37	-43.4294	0	13	0.11467	798.615	-23.5252	1556	1425	-6.02556	852.756	16
2	12050369	12050869	AT2G28260	+	1508	2	12009608	12010108	AT2G28170	+	1819	Yes	Yes	40761	6	0.143681	294.17	-7.43517	1	2	0.136688	103.073	-1.33089	1438	1838	-2.94642	191.097	2
3	4367846	4368346	AT3G13430	+	1065	3	4364969	4365469	AT3G13420	+	143	Yes	NA	2877	14	0.070444	1400	-26.6917	1e-06	10	0.070444	1000	-16.3054	1167	127	-1.60694	400	10
2	16392428	16392928	AT2G39260	+	224	2	16387432	16387932	AT2G39240	+	561	NA	Yes	4996	8	0.070444	800	-11.585	1	3	0.070444	300	-2.52577	303	518	-3.41859	500	4
2	7415432	7415932	AT2G17050	+	1048	2	7401577	7402077	AT2G17033	+	52	Yes	NA	13855	6	0.070444	600	-7.63667	1	1	0.070444	100	-0.454379	1007	68	-5.7057	500	2
2	13796703	13797203	AT2G32500	+	942	2	13783982	13784482	AT2G32460	+	804	Yes	Yes	12721	6	0.070444	600	-7.44119	1	5	0.070444	500	-5.61711	1179	929	-0.579854	100	2
1	10670470	10670970	AT1G30290	+	73	1	10655030	10655530	AT1G30270	+	1297	NA	Yes	15440	6	0.070444	600	-7.57462	1	3	0.070444	300	-2.53637	81	1644	-1.70641	300	2
1	26151508	26152008	AT1G69550	+	274	1	26142069	26142569	AT1G69530	+	1410	Yes	Yes	9439	12	0.070444	1200	-21.1133	0.00025	3	0.070444	300	-2.52698	230	1456	-8.26715	900	-8
3	1831068	1831568	AT3G06070	+	605	3	1825906	1826406	AT3G06050	+	63	Yes	NA	5162	7	0.070444	700	-9.64875	1	4	0.070444	400	-4.02578	585	54	-1.56704	300	2
1	2627472	2627972	AT1G08320	+	667	1	2620473	2620973	AT1G08315	+	102	Yes	NA	6999	7	0.070444	700	-9.54847	1	4	0.070444	400	-3.99406	831	109	-1.55163	300	2
2	7415466	7415966	AT2G17050	+	1048	2	7404547	7405047	AT2G17036	+	54	Yes	NA	10919	6	0.070444	600	-7.62858	1	3	0.070444	300	-2.5442	1007	53	-1.71634	300	2
1	1589956	1590456	AT1G05420	+	123	1	1583972	1584472	AT1G05400	+	1214	NA	Yes	5984	11	0.070444	1100	-18.798	0.002309	6	0.070444	600	-7.52609	108	1255	-2.55072	500	6
1	247199	247699	AT1G01680	+	247	1	245505	246005	AT1G01670	+	221	Yes	NA	1694	9	0.070444	900	-13.828	0.245032	2	0.070444	200	-1.3309	243	210	-6.8914	700	4
1	18438095	18438595	AT1G49800	+	39	1	18436521	18437021	AT1G49790	+	827	NA	Yes	1574	11	0.070444	1100	-19.7239	0.000981	3	0.070444	300	-2.55171	40	944	-7.44184	800	-6
2	18730944	18731444	AT2G45440	+	1837	2	18701032	18701532	AT2G45380	+	70	Yes	NA	29912	8	0.070444	800	-11.808	1	6	0.070444	600	-7.62858	1546	54	-0.932645	200	4
2	17995886	17996386	AT2G43310	+	118	2	17990502	17991002	AT2G43280	+	944	NA	Yes	5384	10	0.070444	1000	-16.3287	0.02395	8	0.070444	800	-11.6712	120	693	-0.897966	200	6
2	6294388	6294888	AT2G14700	+	658	2	6280058	6280558	AT2G14680	+	51	Yes	NA	14330	7	0.070444	700	-9.7123	1	2	0.070444	200	-1.33096	492	41	-4.27286	500	2
1	2204408	2204908	AT1G07180	+	1645	1	2182498	2182998	AT1G07110	+	55	Yes	NA	21910	6	0.070444	600	-7.62477	1	3	0.070444	300	-2.5442	1979	53	-1.71634	300	2
1	10393920	10394420	AT1G29720	+	39	1	10381042	10381542	AT1G29690	+	1186	NA	Yes	12878	6	0.070444	600	-7.71089	1	3	0.070444	300	-2.54891	44	1302	-1.72245	300	2
2	15503612	15504112	AT2G36910	+	51	2	15490076	15490576	AT2G36895	+	1055	NA	Yes	13536	7	0.070444	700	-9.7123	1	2	0.070444	200	-1.33109	25	1328	-4.39875	500	2
1	27669510	27670010	AT1G73600	+	765	1	27651979	27652479	AT1G73570	+	1433	Yes	Yes	17531	9	0.070444	900	-13.7348	0.263045	1	0.070444	100	-0.458275	728	1678	-11.5178	800	-4
2	17039533	17040033	AT2G40820	+	67	2	17032600	17033100	AT2G40810	+	856	NA	Yes	6933	10	0.070444	1000	-16.5863	0.019439	3	0.070444	300	-2.54659	48	979	-5.94111	700	6
1	24040059	24040559	AT1G64700	+	367	1	24036506	24037006	AT1G64680	+	71	Yes	NA	3553	6	0.070444	600	-7.57889	1	1	0.070444	100	-0.453546	297	57	-5.72482	500	2
1	523973	524473	AT1G02520	+	1442	1	519541	520041	AT1G02500	+	348	Yes	Yes	4432	17	0.070444	1700	-34.8004	0	3	0.070444	300	-2.52614	1552	276	-16.1971	1400	-12
1	3902611	3903111	AT1G11600	+	1686	1	3879548	3880048	AT1G11545	+	537	Yes	Yes	23063	7	0.070444	700	-9.42249	1	4	0.070444	400	-3.96953	1722	579	-1.54026	300	2
2	8697048	8697548	AT2G20150	+	1518	2	8688970	8689470	AT2G20120	+	59	Yes	NA	8078	9	0.070444	900	-14.2091	0.184215	3	0.070444	300	-2.53755	1317	75	-4.58493	600	4
2	18500954	18501454	AT2G44860	+	68	2	18496081	18496581	AT2G44840	+	634	NA	Yes	4873	9	0.070444	900	-14.1377	0.195526	5	0.070444	500	-5.68998	81	508	-2.06645	400	4
2	9624459	9624959	AT2G22650	+	134	2	9621645	9622145	AT2G22630	+	589	NA	Yes	2814	6	0.070444	600	-7.50677	1	5	0.070444	500	-5.65946	130	513	-0.574556	100	2
2	10432503	10433003	AT2G24560	+	1049	2	10427881	10428381	AT2G24550	+	92	Yes	NA	4622	9	0.070444	900	-14.0182	0.213892	6	0.070444	600	-7.53633	1083	98	-1.38009	300	4
2	17824054	17824554	AT2G42835	+	116	2	17820521	17821021	AT2G42830	+	1128	NA	Yes	3533	23	0.070444	2300	-54.7152	0	14	0.070444	1400	-26.7561	129	1450	-3.83147	900	20
1	23844530	23845030	AT1G64255	+	1440	1	23833430	23833930	AT1G64230	+	403	Yes	Yes	11100	11	0.070444	1100	-18.5297	0.002898	6	0.070444	600	-7.45092	1814	459	-2.49417	500	6
1	26407130	26407630	AT1G70110	+	967	1	26401033	26401533	AT1G70090	+	204	Yes	NA	6097	9	0.070444	900	-13.8391	0.242967	3	0.070444	300	-2.52953	1234	153	-4.50408	600	4
2	13017972	13018472	AT2G30560	+	92	2	13011532	13012032	AT2G30540	+	1526	Yes	Yes	6440	10	0.070444	1000	-16.4227	0.02227	5	0.070444	500	-5.71187	64	1685	-2.81043	500	6
1	23845088	23845588	AT1G64255	+	1128	1	23835988	23836488	AT1G64235	+	803	Yes	Yes	9100	10	0.070444	1000	-16.0554	0.029808	3	0.070444	300	-2.52345	1300	773	-5.59276	700	6
2	443934	444434	AT2G01950	+	1040	2	434431	434931	AT2G01940	+	73	Yes	Yes	9503	9	0.070444	900	-14.106	0.200521	4	0.070444	400	-4.00687	1206	77	-3.07021	500	4
1	3284503	3285003	AT1G10060	+	907	1	3271027	3271527	AT1G10020	+	69	Yes	NA	13476	7	0.070444	700	-9.62562	1	2	0.070444	200	-1.3309	1018	104	-4.1653	500	2
2	8247924	8248424	AT2G19030	+	107	2	8241135	8241635	AT2G19000	+	884	Yes	Yes	6789	6	0.070444	600	-7.52703	1	1	0.070444	100	-0.453883	61	762	-5.71704	500	2
2	17239550	17240050	AT2G41370	+	1075	2	17235037	17235537	AT2G41360	+	851	Yes	Yes	4513	21	0.070444	2100	-46.5595	0	9	0.070444	900	-13.7345	1090	771	-6.93027	1200	-18
1	6521344	6521844	AT1G18880	+	508	1	6518543	6519043	AT1G18870	+	88	Yes	NA	2801	7	0.070444	700	-9.5739	1	1	0.070444	100	-0.452939	420	51	-7.64097	600	-2
1	18514433	18514933	AT1G49990	+	59	1	18508904	18509404	AT1G49980	+	1253	NA	Yes	5529	14	0.070444	1400	-27.5832	1e-06	8	0.070444	800	-11.9873	46	1370	-3.07781	600	10
2	15185990	15186490	AT2G36210	+	775	2	15184080	15184580	AT2G36200	+	47	Yes	NA	1910	9	0.070444	900	-14.3505	0.161928	2	0.070444	200	-1.33096	602	43	-7.21498	700	-4
2	8080985	8081485	AT2G18630	+	140	2	8073606	8074106	AT2G18600	+	1100	NA	Yes	7379	6	0.070444	600	-7.50334	1	1	0.070444	100	-0.456636	143	744	-5.65493	500	2
1	11181455	11181955	AT1G31280	+	57	1	11166653	11167153	AT1G31250	+	1016	NA	Yes	14802	6	0.070444	600	-7.61756	1	5	0.070444	500	-5.72277	58	1205	-0.566597	100	2
1	20941999	20942499	AT1G55990	+	37	1	20937532	20938032	AT1G55970	+	887	NA	Yes	4467	6	0.070444	600	-7.72728	1	5	0.070444	500	-5.70024	72	919	-0.569436	100	2
3	1440570	1441070	AT3G05150	+	1133	3	1431056	1431556	AT3G05120	+	58	Yes	NA	9514	8	0.070444	800	-11.878	1	6	0.070444	600	-7.58342	1273	69	-0.932455	200	4
1	3882984	3883484	AT1G11570	+	864	1	3881087	3881587	AT1G11550	+	235	Yes	NA	1897	12	0.070444	1200	-21.1481	0.000242	7	0.070444	700	-9.45819	847	241	-2.3499	500	8
1	26726068	26726568	AT1G70890	+	1272	1	26715040	26715540	AT1G70850	+	142	Yes	NA	11028	9	0.070444	900	-13.9024	0.231872	1	0.070444	100	-0.456449	1490	131	-11.6554	800	-4
3	1632587	1633087	AT3G05625	+	407	3	1627436	1627936	AT3G05610	+	152	Yes	NA	5151	7	0.070444	700	-9.49662	1	3	0.070444	300	-2.53055	407	135	-2.50535	400	2
3	3156482	3156982	AT3G10195	+	421	3	3155440	3155940	AT3G10190	+	1015	NA	Yes	1042	53	0.070444	5300	-164.608	0	40	0.070444	4000	-112.77	517	1252	-3.41657	1300	64
2	7669539	7670039	AT2G17640	+	1210	2	7665496	7665996	AT2G17620	+	68	Yes	NA	4043	18	0.070444	1800	-39.5687	0	6	0.070444	600	-7.65012	954	49	-10.1012	1200	-14
3	3494019	3494519	AT3G11150	+	93	3	3480019	3480519	AT3G11110	+	1635	NA	Yes	14000	6	0.070444	600	-7.5423	1	3	0.070444	300	-2.53303	105	2009	-1.70226	300	2
2	16392376	16392876	AT2G39260	+	224	2	16388929	16389429	AT2G39250	+	135	NA	Yes	3447	8	0.070444	800	-11.6503	1	3	0.070444	300	-2.53172	303	119	-3.45481	500	4
1	21146402	21146902	AT1G56460	+	1109	1	21113371	21113871	AT1G56400	+	1298	Yes	Yes	33031	7	0.0754	653.993	-9.40764	1	0	0.073231	0	1.00042	1199	1181	1.00042	653.993	2
2	13814964	13815464	AT2G32540	+	956	2	13796899	13797399	AT2G32500	+	951	Yes	Yes	18065	6	0.070444	600	-7.4392	1	3	0.070444	300	-2.52302	1087	1223	-1.69008	300	2
1	20280643	20281143	AT1G54330	+	1276	1	20270975	20271475	AT1G54300	+	228	Yes	Yes	9668	7	0.070444	700	-9.46191	1	2	0.070444	200	-1.3309	1255	192	-4.13514	500	2
2	19695974	19696474	AT2G48160	+	668	2	19688529	19689029	AT2G48150	+	137	Yes	NA	7445	9	0.070444	900	-13.9101	0.230652	8	0.070444	800	-11.6433	672	141	-0.595782	100	4
2	7415459	7415959	AT2G17050	+	1048	2	7409492	7409992	AT2G17043	+	36	Yes	NA	5967	8	0.070444	800	-12.1397	1	2	0.070444	200	-1.33112	1007	23	-5.93919	600	4
2	13796871	13797371	AT2G32500	+	951	2	13787497	13787997	AT2G32470	+	98	Yes	NA	9374	6	0.070444	600	-7.53633	1	5	0.070444	500	-5.66455	1223	118	-0.573919	100	2
1	24201520	24202020	AT1G65140	+	176	1	24195457	24195957	AT1G65120	+	643	NA	Yes	6063	7	0.070444	700	-9.48237	1	3	0.070444	300	-2.52774	200	682	-2.49627	400	2
3	1831481	1831981	AT3G06070	+	449	3	1829949	1830449	AT3G06060	+	120	Yes	NA	1532	12	0.070444	1200	-21.3875	0.000197	6	0.070444	600	-7.53864	475	96	-3.2862	600	8
2	1080587	1081087	AT2G03560	+	1196	2	1059918	1060418	AT2G03500	+	95	Yes	NA	20669	9	0.070444	900	-14.0077	0.215503	1	0.070444	100	-0.454248	1128	66	-11.8283	800	-4
1	1589978	1590478	AT1G05420	+	123	1	1587118	1587618	AT1G05410	+	1630	NA	Yes	2860	19	0.070444	1900	-41.6111	0	12	0.070444	1200	-21.4432	108	1714	-2.95722	700	16
1	8242444	8242944	AT1G23220	+	104	1	8234118	8234618	AT1G23205	+	1750	NA	Yes	8326	10	0.070444	1000	-16.3733	0.023149	6	0.070444	600	-7.53199	102	1906	-1.92128	400	6
3	301009	301509	AT3G01850	+	55	3	294876	295376	AT3G01820	+	1788	NA	Yes	6133	6	0.070444	600	-7.62477	1	2	0.070444	200	-1.33098	38	1932	-3.04118	400	2
2	6292082	6292582	AT2G14700	+	523	2	6287570	6288070	AT2G14692	+	991	Yes	Yes	4512	15	0.070444	1500	-29.0117	0	5	0.070444	500	-5.62214	534	847	-7.33921	1000	-10
2	1015508	1016008	AT2G03340	+	47	2	1008957	1009457	AT2G03330	+	1276	NA	Yes	6551	6	0.070444	600	-7.66008	1	2	0.070444	200	-1.33105	28	1470	-3.07963	400	2
1	10194475	10194975	AT1G29170	+	1333	1	10180083	10180583	AT1G29150	+	133	Yes	NA	14392	12	0.070444	1200	-21.3389	0.000205	4	0.070444	400	-3.988	1562	136	-6.03604	800	8
2	11570986	11571486	AT2G27090	+	905	2	11553996	11554496	AT2G27060	+	80	Yes	Yes	16990	7	0.070444	700	-9.59257	1	3	0.070444	300	-2.53798	1069	73	-2.52988	400	2
1	24860437	24860937	AT1G66650	+	330	1	24857904	24858404	AT1G66640	+	454	Yes	NA	2533	10	0.070444	1000	-16.1215	0.028267	4	0.070444	400	-3.97387	327	387	-3.88072	600	6
1	7925068	7925568	AT1G22450	+	203	1	7906541	7907041	AT1G22400	+	1235	NA	Yes	18527	8	0.070444	800	-11.5952	1	3	0.070444	300	-2.52765	203	1061	-3.42997	500	4
1	20698473	20698973	AT1G55430	+	753	1	20682004	20682504	AT1G55390	+	1861	NA	Yes	16469	16	0.073402	1535.53	-31.7526	0	9	0.0785	807.644	-13.7347	767	1979	-4.36677	727.891	12
1	7034013	7034513	AT1G20320	+	473	1	7030554	7031054	AT1G20300	+	370	Yes	NA	3459	7	0.070444	700	-9.43556	1	4	0.070444	400	-3.97409	540	320	-1.54233	300	2
1	523963	524463	AT1G02520	+	1442	1	520540	521040	AT1G02510	+	1013	Yes	Yes	3423	17	0.076514	1565.15	-34.5677	0	10	0.084036	838.263	-16.0448	1552	1047	-4.27929	726.885	12
1	7924988	7925488	AT1G22450	+	203	1	7909539	7910039	AT1G22403	+	1224	NA	Yes	15449	7	0.070444	700	-9.47042	1	4	0.070444	400	-3.97999	203	1104	-1.54505	300	2
2	14557135	14557635	AT2G34555	+	944	2	14548938	14549438	AT2G34530	+	67	Yes	NA	8197	6	0.070444	600	-7.58823	1	1	0.070444	100	-0.454618	1042	72	-5.70024	500	2
1	7911966	7912466	AT1G22410	+	140	1	7899528	7900028	AT1G22370	+	1699	NA	Yes	12438	6	0.070444	600	-7.50334	1	3	0.070444	300	-2.52958	152	1581	-1.69801	300	2
2	8697960	8698460	AT2G20150	+	1667	2	8691992	8692492	AT2G20130	+	102	Yes	NA	5968	10	0.070444	1000	-16.3807	0.023016	6	0.070444	600	-7.53304	1811	101	-1.92173	400	6
2	13434484	13434984	AT2G31550	+	1203	2	13429965	13430465	AT2G31530	+	150	Yes	NA	4519	25	0.070444	2500	-60.9257	0	13	0.070444	1300	-23.8984	1215	163	-5.93474	1200	22
1	22664442	22664942	AT1G61430	+	56	1	22649321	22649821	AT1G61380	+	1774	NA	Yes	15121	6	0.070444	600	-7.6211	1	2	0.070444	200	-1.33092	68	1696	-2.99653	400	2
3	2898022	2898522	AT3G09410	+	156	3	2897013	2897513	AT3G09405	+	1658	NA	Yes	1009	30	0.070444	3000	-78.425	0	13	0.070444	1300	-24.2323	93	1757	-10.9923	1700	-30
1	26654621	26655121	AT1G70700	+	597	1	26646525	26647025	AT1G70680	+	57	Yes	NA	8096	6	0.070444	600	-7.61756	1	2	0.070444	200	-1.33092	768	73	-2.99279	400	2
1	26419448	26419948	AT1G70150	+	1425	1	26410526	26411026	AT1G70130	+	333	NA	Yes	8922	6	0.070444	600	-7.45954	1	2	0.070444	200	-1.33089	1785	304	-2.95541	400	2
1	9844046	9844546	AT1G28180	+	86	1	9841084	9841584	AT1G28170	+	1252	NA	Yes	2962	26	0.070444	2600	-66.1573	0	16	0.070444	1600	-33.0961	77	1104	-4.50069	1000	26
1	4133030	4133530	AT1G12190	+	1736	1	4120089	4120589	AT1G12130	+	124	Yes	NA	12941	8	0.070444	800	-11.6651	1	2	0.070444	200	-1.3309	1660	104	-5.5017	600	4
1	12449959	12450459	AT1G34180	+	477	1	12441529	12442029	AT1G34160	+	74	Yes	NA	8430	6	0.070444	600	-7.57257	1	1	0.070444	100	-0.454674	463	73	-5.69897	500	2
2	8247614	8248114	AT2G19030	+	167	2	8243594	8244094	AT2G19010	+	475	Yes	Yes	4020	6	0.070444	600	-7.49103	1	0	0.070444	0	1.00572	88	505	1.00572	600	2
1	8864480	8864980	AT1G25280	+	1408	1	8858101	8858601	AT1G25270	+	59	Yes	NA	6379	7	0.070444	700	-9.66691	1	1	0.070444	100	-0.453156	1346	53	-7.63255	600	-2
2	11763424	11763924	AT2G27530	+	442	2	11753048	11753548	AT2G27500	+	105	Yes	NA	10376	6	0.070444	600	-7.52895	1	2	0.070444	200	-1.3309	382	103	-2.97821	400	2
1	18246999	18247499	AT1G49320	+	113	1	18234988	18235488	AT1G49300	+	1069	NA	Yes	12011	9	0.070444	900	-13.9567	0.223356	3	0.070444	300	-2.53476	91	1211	-4.55648	600	4
1	4312908	4313408	AT1G12665	+	38	1	4299107	4299607	AT1G12630	+	1857	NA	Yes	13801	6	0.070444	600	-7.71885	1	0	0	0	0	0	0	0	600	2
2	12620054	12620554	AT2G29440	+	1267	2	12618526	12619026	AT2G29420	+	285	Yes	NA	1528	34	0.070444	3400	-91.4879	0	23	0.070444	2300	-53.6574	1376	220	-3.81095	1100	34
1	8866506	8867006	AT1G25280	+	136	1	8860593	8861093	AT1G25275	+	1362	Yes	Yes	5913	10	0.070444	1000	-16.2853	0.024776	2	0.070444	200	-1.3309	142	1512	-8.50301	800	-6
1	26872502	26873002	AT1G71290	+	1334	1	26862415	26862915	AT1G71260	+	63	Yes	NA	10087	7	0.070444	700	-9.64875	1	3	0.070444	300	-2.53435	1351	94	-2.5178	400	2
1	3008976	3009476	AT1G09310	+	75	1	3003941	3004441	AT1G09300	+	1158	NA	Yes	5035	17	0.070444	1700	-36.2024	0	9	0.070444	900	-14.0837	77	1289	-4.17389	800	14
1	25768897	25769397	AT1G68630	+	44	1	25759921	25760421	AT1G68600	+	905	NA	Yes	8976	8	0.070444	800	-12.0118	1	4	0.070444	400	-4.02955	51	1066	-2.28226	400	4
1	19965053	19965553	AT1G53490	+	58	1	19958808	19959308	AT1G53470	+	464	NA	Yes	6245	7	0.070444	700	-9.67187	1	1	0.070444	100	-0.454248	66	384	-7.59074	600	-2
2	11764103	11764603	AT2G27530	+	1246	2	11756498	11756998	AT2G27505	+	75	Yes	NA	7605	10	0.070444	1000	-16.5215	0.02055	7	0.070444	700	-9.61241	1387	73	-1.33158	300	6
2	8988390	8988890	AT2G20890	+	798	2	8980007	8980507	AT2G20860	+	314	Yes	NA	8383	9	0.070444	900	-13.7889	0.252734	4	0.070444	400	-3.97283	880	365	-2.99271	500	4
1	24614924	24615424	AT1G66130	+	1020	1	24606004	24606504	AT1G66100	+	1650	Yes	Yes	8920	9	0.088155	719.183	-13.7255	0.264864	6	0.081074	521.33	-7.4391	960	1633	-1.36419	197.853	4
3	1767927	1768427	AT3G05920	+	52	3	1749539	1750039	AT3G05858	+	1858	NA	Yes	18388	6	0.070444	600	-7.63667	1	0	0	0	0	0	0	0	600	2
1	575948	576448	AT1G02670	+	158	1	574085	574585	AT1G02660	+	667	NA	Yes	1863	15	0.070444	1500	-29.4347	0	8	0.070444	800	-11.6263	158	599	-3.49262	700	10
1	7901552	7902052	AT1G22380	+	296	1	7899506	7900006	AT1G22370	+	1699	Yes	Yes	2046	29	0.070444	2900	-73.5479	0	6	0.070444	600	-7.46051	323	1581	-24.245	2300	-28
3	2938418	2938918	AT3G09560	+	632	3	2933512	2934012	AT3G09550	+	74	Yes	NA	4906	12	0.070444	1200	-21.7057	0.000149	6	0.070444	600	-7.65012	372	49	-3.43306	600	8
3	1439878	1440378	AT3G05150	+	569	3	1434895	1435395	AT3G05130	+	70	Yes	NA	4983	6	0.070444	600	-7.58112	1	1	0.070444	100	-0.455025	589	80	-5.691	500	2
1	3883464	3883964	AT1G11570	+	1345	1	3882478	3882978	AT1G11560	+	986	Yes	Yes	986	62	0.070444	6200	-199.748	0	50	0.075562	4661.37	-150.734	1556	939	-4.15559	1538.63	78
3	1632159	1632659	AT3G05625	+	155	3	1630915	1631415	AT3G05620	+	944	Yes	Yes	1244	19	0.070444	1900	-41.325	0	5	0.070444	500	-5.67323	102	985	-12.9879	1400	-16
3	607383	607883	AT3G02800	+	630	3	601405	601905	AT3G02770	+	110	Yes	NA	5978	6	0.070444	600	-7.52428	1	3	0.070444	300	-2.53435	774	94	-1.70389	300	2
1	24683375	24683875	AT1G66235	+	1267	1	24657008	24657508	AT1G66200	+	108	Yes	NA	26367	6	0.070444	600	-7.52609	1	3	0.070444	300	-2.53243	1175	111	-1.70151	300	2
1	24281473	24281973	AT1G65360	+	1366	1	24255005	24255505	AT1G65300	+	121	Yes	NA	26468	8	0.070444	800	-11.6696	1	3	0.070444	300	-2.53197	1379	116	-3.45639	500	4
3	3493953	3494453	AT3G11150	+	93	3	3481313	3481813	AT3G11120	+	1412	NA	Yes	12640	6	0.070444	600	-7.5423	1	3	0.070444	300	-2.53303	105	1703	-1.70226	300	2
1	11555426	11555926	AT1G32120	+	239	1	11547537	11548037	AT1G32100	+	981	Yes	Yes	7889	15	0.070444	1500	-29.2266	0	6	0.070444	600	-7.47532	222	815	-5.75968	900	10
3	3086978	3087478	AT3G10010	+	68	3	3074385	3074885	AT3G09990	+	732	NA	Yes	12593	6	0.070444	600	-7.58578	1	1	0.070444	100	-0.454502	70	855	-5.70289	500	2
2	10057517	10058017	AT2G23640	+	192	2	10048588	10049088	AT2G23620	+	845	NA	Yes	8929	10	0.070444	1000	-16.2033	0.026432	0	0.070444	0	1.00238	211	948	1.00238	1000	6
2	13796683	13797183	AT2G32500	+	942	2	13789433	13789933	AT2G32480	+	141	Yes	NA	7250	9	0.070444	900	-13.9039	0.231651	5	0.070444	500	-5.6537	1179	147	-2.04228	400	4
1	12371451	12371951	AT1G34030	+	512	1	12367008	12367508	AT1G34020	+	56	Yes	NA	4443	13	0.070444	1300	-24.7797	8e-06	3	0.070444	300	-2.54223	553	58	-10.2589	1000	-8
2	1079967	1080467	AT2G03560	+	668	2	1067579	1068079	AT2G03510	+	116	Yes	NA	12388	7	0.070444	700	-9.52933	1	4	0.070444	400	-3.99125	758	120	-1.55031	300	2
1	8243592	8244092	AT1G23220	+	75	1	8240962	8241462	AT1G23210	+	416	NA	Yes	2630	6	0.070444	600	-7.57058	1	1	0.070444	100	-0.455571	94	384	-5.67871	500	2
1	9829538	9830038	AT1G28135	+	148	1	9825888	9826388	AT1G28130	+	431	Yes	Yes	3650	7	0.070444	700	-9.49945	1	4	0.070444	400	-3.98247	176	495	-1.5462	300	2
2	19080921	19081421	AT2G46493	+	680	2	19077493	19077993	AT2G46480	+	101	Yes	NA	3428	6	0.070444	600	-7.53304	1	2	0.070444	200	-1.33091	765	100	-2.97926	400	2
3	3353454	3353954	AT3G10710	+	1188	3	3344926	3345426	AT3G10690	+	74	Yes	NA	8528	6	0.070444	600	-7.57257	1	5	0.070444	500	-5.69424	1441	77	-0.570191	100	2
2	13794043	13794543	AT2G32500	+	45	2	13792154	13792654	AT2G32487	+	729	Yes	Yes	1889	9	0.070444	900	-14.3821	0.157144	1	0.070444	100	-0.44226	18	901	-12.9414	800	-4
1	10191509	10192009	AT1G29170	+	161	1	10183618	10184118	AT1G29160	+	1602	Yes	Yes	7891	18	0.070444	1800	-38.2251	0	6	0.070444	600	-7.52339	111	1843	-9.21541	1200	-14
1	3902612	3903112	AT1G11600	+	1686	1	3882483	3882983	AT1G11560	+	986	Yes	Yes	20129	7	0.087076	566.297	-9.40938	1	2	0.083623	168.481	-1.33089	1722	939	-4.10753	397.817	2
1	7033444	7033944	AT1G20320	+	323	1	7032608	7033108	AT1G20310	+	374	Yes	Yes	836	14	0.070444	1400	-26.3693	2e-06	6	0.070444	600	-7.46396	292	521	-4.81072	800	10
2	17640930	17641430	AT2G42360	+	167	2	17639903	17640403	AT2G42350	+	275	NA	Yes	1027	10	0.070444	1000	-16.2329	0.025821	1	0.070444	100	-0.456449	131	179	-13.9201	900	-6
2	14557518	14558018	AT2G34555	+	1791	2	14552024	14552524	AT2G34540	+	81	Yes	NA	5494	25	0.070444	2500	-62.8185	0	9	0.070444	900	-14.2091	1908	59	-13.0242	1600	-24
2	7914568	7915068	AT2G18190	+	455	2	7912615	7913115	AT2G18180	+	592	Yes	Yes	1953	21	0.070444	2100	-46.7593	0	7	0.070444	700	-9.44154	324	530	-10.2804	1400	-18
1	7912529	7913029	AT1G22410	+	114	1	7902020	7902520	AT1G22380	+	1742	NA	Yes	10509	7	0.070444	700	-9.53177	1	6	0.070444	600	-7.51118	127	1977	-0.583006	100	2
1	2343558	2344058	AT1G07615	+	620	1	2336488	2336988	AT1G07590	+	44	Yes	NA	7070	6	0.070444	600	-7.67684	1	1	0.070444	100	-0.449504	814	32	-5.8207	500	2
1	29195018	29195518	AT1G77680	+	909	1	29182947	29183447	AT1G77655	+	125	Yes	NA	12071	6	0.070444	600	-7.51253	1	5	0.070444	500	-5.66455	919	118	-0.573919	100	2
2	13287952	13288452	AT2G31180	+	1282	2	13270955	13271455	AT2G31140	+	103	Yes	NA	16997	6	0.070444	600	-7.53096	1	4	0.070444	400	-3.99463	1410	107	-0.991177	200	2
1	23027588	23028088	AT1G62305	+	78	1	23012520	23013020	AT1G62290	+	954	NA	Yes	15068	6	0.070444	600	-7.56493	1	1	0.070444	100	-0.454979	79	972	-5.69205	500	2
1	26655476	26655976	AT1G70700	+	407	1	26653511	26654011	AT1G70690	+	267	Yes	NA	1965	6	0.070444	600	-7.46733	1	2	0.070444	200	-1.33089	489	263	-2.9572	400	2
1	6180968	6181468	AT1G17960	+	45	1	6178314	6178814	AT1G17950	+	402	NA	Yes	2654	7	0.070444	700	-9.75766	1	2	0.070444	200	-1.33092	68	361	-4.2012	500	2
1	24509486	24509986	AT1G65880	+	1112	1	24494567	24495067	AT1G65850	+	862	NA	Yes	14919	7	0.070444	700	-9.41163	1	4	0.070444	400	-3.96702	1055	1049	-1.53912	300	2
1	26416989	26417489	AT1G70150	+	235	1	26415025	26415525	AT1G70140	+	831	NA	Yes	1964	10	0.070444	1000	-16.1673	0.027213	3	0.070444	300	-2.52687	235	846	-5.64134	700	6
1	23505521	23506021	AT1G63380	+	81	1	23497024	23497524	AT1G63350	+	1191	NA	Yes	8497	11	0.070444	1100	-19.0071	0.001939	4	0.070444	400	-3.9975	98	1449	-4.98805	700	6
2	7733530	7734030	AT2G17790	+	83	2	7728567	7729067	AT2G17785	+	729	NA	Yes	4963	6	0.070444	600	-7.55645	1	1	0.070444	100	-0.4552	84	530	-5.68706	500	2
2	9326037	9326537	AT2G21880	+	1681	2	9316974	9317474	AT2G21850	+	126	Yes	NA	9063	12	0.070444	1200	-21.3638	0.000201	9	0.070444	900	-13.9331	1785	124	-1.23994	300	8
1	3284951	3285451	AT1G10060	+	945	1	3278067	3278567	AT1G10040	+	110	Yes	NA	6884	7	0.070444	700	-9.53692	1	3	0.070444	300	-2.53215	814	114	-2.51057	400	2
1	1736934	1737434	AT1G05790	+	99	1	1721950	1722450	AT1G05750	+	1601	NA	Yes	14984	6	0.070444	600	-7.53521	1	2	0.070444	200	-1.33091	84	1644	-2.98619	400	2
1	12449319	12449819	AT1G34180	+	439	1	12446093	12446593	AT1G34170	+	46	Yes	NA	3226	6	0.070444	600	-7.66541	1	2	0.070444	200	-1.33095	371	45	-3.02509	400	2
1	6267617	6268117	AT1G18210	+	663	1	6265476	6265976	AT1G18200	+	87	Yes	NA	2141	11	0.070444	1100	-18.9643	0.002013	8	0.070444	800	-11.7494	790	85	-1.28378	300	6
1	18247074	18247574	AT1G49320	+	113	1	18237694	18238194	AT1G49310	+	400	NA	Yes	9380	8	0.070444	800	-11.6828	1	3	0.070444	300	-2.53476	91	396	-3.47375	500	4
3	3081485	3081985	AT3G10010	+	81	3	3076833	3077333	AT3G10000	+	1114	NA	Yes	4652	11	0.070444	1100	-19.0071	0.001939	1	0.070444	100	-0.455571	94	1265	-16.4136	1000	-6
1	21189536	21190036	AT1G56553	+	81	1	21177872	21178372	AT1G56520	+	1845	NA	Yes	11664	6	0.070444	600	-7.55971	1	0	0	0	0	0	0	0	600	2
1	19126081	19126581	AT1G51580	+	1347	1	19121580	19122080	AT1G51560	+	66	Yes	NA	4501	11	0.070444	1100	-19.1508	0.001707	6	0.070444	600	-7.61756	1555	57	-2.62467	500	6
2	12620118	12620618	AT2G29440	+	1267	2	12619439	12619939	AT2G29430	+	1288	Yes	Yes	679	66	0.085478	5439.17	-216.189	0	51	0.109518	3280.44	-154.292	1376	1539	-9.5794	2158.73	-84
2	7928400	7928900	AT2G18220	+	90	2	7912882	7913382	AT2G18180	+	1401	NA	Yes	15518	7	0.070444	700	-9.56977	1	5	0.070444	500	-5.6655	116	1360	-0.957084	200	2
1	26872605	26873105	AT1G71290	+	1334	1	26864490	26864990	AT1G71270	+	67	Yes	NA	8115	8	0.070444	800	-11.823	1	1	0.070444	100	-0.453259	1351	54	-9.69361	700	-4
2	8988055	8988555	AT2G20890	+	1201	2	8982095	8982595	AT2G20870	+	135	Yes	Yes	5960	7	0.070444	700	-9.50985	1	3	0.070444	300	-2.53206	1282	115	-2.51028	400	2
2	13910396	13910896	AT2G32795	+	1406	2	13894854	13895354	AT2G32765	+	86	Yes	NA	15542	7	0.070444	700	-9.57823	1	1	0.070444	100	-0.455635	1626	96	-7.53864	600	-2
1	21417841	21418341	AT1G57820	+	641	1	21410417	21410917	AT1G57800	+	73	Yes	NA	7424	7	0.070444	700	-9.61241	1	2	0.070444	200	-1.33093	668	58	-4.21952	500	2
1	24616133	24616633	AT1G66130	+	200	1	24609981	24610481	AT1G66110	+	1181	Yes	Yes	6152	9	0.070444	900	-13.842	0.242402	4	0.070444	400	-3.97761	238	1189	-3.00328	500	4
1	23086078	23086578	AT1G62390	+	62	1	23082890	23083390	AT1G62380	+	534	NA	Yes	3188	6	0.070444	600	-7.60166	1	1	0.070444	100	-0.454109	64	762	-5.71187	500	2
1	29744978	29745478	AT1G79070	+	140	1	29733393	29733893	AT1G79030	+	944	NA	Yes	11585	10	0.070444	1000	-16.2772	0.024932	6	0.070444	600	-7.49597	155	910	-1.90616	400	6
3	1440525	1441025	AT3G05150	+	1133	3	1437506	1438006	AT3G05140	+	596	Yes	Yes	3019	30	0.070444	3000	-76.3198	0	15	0.070444	1500	-29.0357	1273	461	-7.27683	1500	-30
2	1726460	1726960	AT2G04920	+	689	2	1722971	1723471	AT2G04900	+	47	Yes	NA	3489	6	0.070444	600	-7.66008	1	1	0.070444	100	-0.448887	455	30	-5.83581	500	2
3	2822027	2822527	AT3G09190	+	115	3	2806329	2806829	AT3G09160	+	709	NA	Yes	15698	6	0.070444	600	-7.52001	1	1	0.070444	100	-0.455603	95	904	-5.67797	500	2
1	21952528	21953028	AT1G59730	+	72	1	21951014	21951514	AT1G59725	+	1294	Yes	Yes	1514	14	0.070444	1400	-27.2979	1e-06	4	0.070444	400	-4.04229	43	1378	-9.23913	1000	-10
2	15877427	15877927	AT2G37940	+	1220	2	15874114	15874614	AT2G37930	+	124	Yes	Yes	3313	15	0.070444	1500	-29.607	0	7	0.070444	700	-9.49662	1295	152	-4.51979	800	10
3	606433	606933	AT3G02800	+	328	3	604026	604526	AT3G02780	+	562	Yes	Yes	2407	8	0.070444	800	-11.5541	1	4	0.070444	400	-3.98166	184	331	-2.22215	400	4
1	24281396	24281896	AT1G65360	+	1366	1	24258424	24258924	AT1G65310	+	79	Yes	NA	22972	7	0.070444	700	-9.59518	1	3	0.070444	300	-2.54121	1379	61	-2.54075	400	2
1	24683431	24683931	AT1G66235	+	1267	1	24667590	24668090	AT1G66210	+	402	Yes	Yes	15841	7	0.070444	700	-9.43221	1	2	0.070444	200	-1.33089	1175	331	-4.12048	500	2
2	13814976	13815476	AT2G32540	+	956	2	13805932	13806432	AT2G32520	+	128	Yes	NA	9044	7	0.070444	700	-9.51634	1	4	0.070444	400	-3.99246	1087	115	-1.55088	300	2
1	20280073	20280573	AT1G54330	+	995	1	20276044	20276544	AT1G54320	+	87	Yes	NA	4029	14	0.070444	1400	-27.0819	1e-06	4	0.070444	400	-3.99896	1045	94	-8.63305	1000	-10
3	1907060	1907560	AT3G06290	+	1059	3	1894469	1894969	AT3G06260	+	51	Yes	NA	12591	6	0.070444	600	-7.64097	1	4	0.070444	400	-4.0674	1150	33	-0.991847	200	2
2	18872449	18872949	AT2G45850	+	91	2	18869561	18870061	AT2G45840	+	515	Yes	Yes	2888	11	0.070444	1100	-18.939	0.002056	3	0.070444	300	-2.53869	70	550	-7.14967	800	-6
2	9280843	9281343	AT2G21730	+	649	2	9273002	9273502	AT2G21710	+	59	Yes	NA	7841	9	0.070444	900	-14.2091	0.184215	2	0.070444	200	-1.33093	646	58	-7.10438	700	-4
2	18077021	18077521	AT2G43570	+	212	2	18068910	18069410	AT2G43520	+	1123	NA	Yes	8111	12	0.070444	1200	-21.1747	0.000237	3	0.070444	300	-2.52649	255	1207	-8.25418	900	-8
3	6045049	6045549	AT3G17690	+	1022	3	6038455	6038955	AT3G17660	+	67	Yes	NA	6594	9	0.070444	900	-14.1446	0.194473	3	0.070444	300	-2.54659	1005	48	-4.6803	600	4
2	10057506	10058006	AT2G23640	+	192	2	10055309	10055809	AT2G23630	+	357	NA	Yes	2197	6	0.070444	600	-7.48276	1	2	0.070444	200	-1.3309	211	358	-2.96049	400	2
2	18745538	18746038	AT2G45480	+	29	2	18730996	18731496	AT2G45440	+	1837	NA	Yes	14542	6	0.070444	600	-7.81763	1	1	0.070444	100	-0.431543	11	1546	-6.32366	500	2
1	8890476	8890976	AT1G25350	+	42	1	8878541	8879041	AT1G25320	+	1385	NA	Yes	11935	7	0.070444	700	-9.78556	1	4	0.070444	400	-4.0235	56	1470	-1.56591	300	2
1	12459514	12460014	AT1G34210	+	58	1	12448985	12449485	AT1G34180	+	807	NA	Yes	10529	6	0.070444	600	-7.61415	1	3	0.070444	300	-2.54464	52	799	-1.71691	300	2
2	1079426	1079926	AT2G03560	+	1051	2	1069468	1069968	AT2G03520	+	65	Yes	NA	9958	8	0.070444	800	-11.8338	1	2	0.070444	200	-1.33098	1228	37	-5.71232	600	4
2	19080590	19081090	AT2G46493	+	265	2	19079071	19079571	AT2G46490	+	316	Yes	Yes	1519	6	0.070444	600	-7.46762	1	1	0.070444	100	-0.457339	218	337	-5.63943	500	2
1	22714939	22715439	AT1G61563	+	801	1	22701998	22702498	AT1G61540	+	175	Yes	NA	12941	7	0.070444	700	-9.48288	1	5	0.070444	500	-5.64176	728	202	-0.957034	200	2
3	6045566	6046066	AT3G17690	+	930	3	6040008	6040508	AT3G17668	+	29	Yes	NA	5558	6	0.070444	600	-7.81763	1	5	0.070444	500	-5.73888	991	51	-0.564563	100	2
1	12287987	12288487	AT1G33850	+	837	1	12268917	12269417	AT1G33811	+	252	Yes	Yes	19070	8	0.070444	800	-11.5742	1	7	0.070444	700	-9.46131	1097	230	-0.593128	100	4
1	24130965	24131465	AT1G64960	+	49	1	24117683	24118183	AT1G64920	+	1002	NA	Yes	13282	7	0.070444	700	-9.72611	1	3	0.070444	300	-2.53893	69	890	-2.53306	400	2
1	11356518	11357018	AT1G31720	+	903	1	11354538	11355038	AT1G31710	+	203	Yes	Yes	1980	35	0.070444	3500	-96.0553	0	17	0.070444	1700	-35.188	715	169	-9.58086	1800	-36
1	23102934	23103434	AT1G62420	+	57	1	23082480	23082980	AT1G62380	+	1670	NA	Yes	20454	7	0.070444	700	-9.677	1	1	0.070444	100	-0.453454	56	1834	-7.6211	600	-2
1	19067931	19068431	AT1G51430	+	216	1	19065704	19066204	AT1G51420	+	646	NA	Yes	2227	13	0.070444	1300	-23.793	1.9e-05	9	0.070444	900	-13.8505	189	493	-1.64923	400	8
1	18926925	18927425	AT1G51060	+	111	1	18913366	18913866	AT1G51020	+	1086	NA	Yes	13559	6	0.070444	600	-7.52339	1	1	0.070444	100	-0.455358	88	1092	-5.68349	500	2
1	23888875	23889375	AT1G64370	+	801	1	23878473	23878973	AT1G64340	+	98	Yes	NA	10402	8	0.070444	800	-11.7136	1	6	0.070444	600	-7.52428	916	110	-0.93228	200	4
1	3902919	3903419	AT1G11600	+	568	1	3883594	3884094	AT1G11570	+	1345	Yes	Yes	19325	7	0.070444	700	-9.42092	1	3	0.070444	300	-2.5241	539	1556	-2.48465	400	2
2	11571010	11571510	AT2G27090	+	905	2	11564509	11565009	AT2G27080	+	255	Yes	Yes	6501	10	0.070444	1000	-16.1548	0.027502	2	0.070444	200	-1.33089	1069	330	-8.41219	800	-6
2	8998623	8999123	AT2G20920	+	86	2	8986367	8986867	AT2G20880	+	1889	NA	Yes	12256	7	0.070444	700	-9.57823	1	0	0	0	0	0	0	0	700	2
2	13683553	13684053	AT2G32235	+	66	2	13674941	13675441	AT2G32190	+	1225	NA	Yes	8612	6	0.070444	600	-7.59074	1	3	0.070444	300	-2.53585	84	990	-1.70576	300	2
2	16892442	16892942	AT2G40450	+	698	2	16890600	16891100	AT2G40440	+	156	Yes	Yes	1842	11	0.070444	1100	-18.715	0.002473	6	0.070444	600	-7.50445	635	138	-2.53407	500	6
1	3902557	3903057	AT1G11600	+	1686	1	3884464	3884964	AT1G11572	+	313	Yes	NA	18093	8	0.070444	800	-11.5573	1	6	0.070444	600	-7.46232	1722	306	-0.932186	200	4
1	24706061	24706561	AT1G66280	+	150	1	24697606	24698106	AT1G66260	+	998	Yes	Yes	8455	6	0.070444	600	-7.49826	1	1	0.070444	100	-0.456745	151	976	-5.65253	500	2
1	29948062	29948562	AT1G79590	+	23	1	29943047	29943547	AT1G79580	+	1013	NA	Yes	5015	6	0.070444	600	-7.93186	1	1	0.070444	100	-0.44226	18	1031	-6.00686	500	2
2	13287957	13288457	AT2G31180	+	1282	2	13273991	13274491	AT2G31150	+	111	Yes	NA	13966	10	0.070444	1000	-16.3495	0.023579	8	0.070444	800	-11.6622	1410	126	-0.897953	200	6
3	676164	676664	AT3G02990	+	102	3	668095	668595	AT3G02960	+	1163	NA	Yes	8069	6	0.070444	600	-7.53199	1	2	0.070444	200	-1.33091	81	1227	-2.98781	400	2
2	18364648	18365148	AT2G44490	+	1681	2	18356460	18356960	AT2G44470	+	742	Yes	Yes	8188	7	0.070444	700	-9.41453	1	5	0.074203	474.67	-5.61777	1694	847	-1.43808	225.33	2
1	23505588	23506088	AT1G63380	+	81	1	23501046	23501546	AT1G63360	+	610	NA	Yes	4542	8	0.070444	800	-11.7628	1	4	0.070444	400	-3.9975	98	748	-2.24147	400	4
2	13117527	13118027	AT2G30780	+	64	2	13100968	13101468	AT2G30750	+	1439	NA	Yes	16559	9	0.070444	900	-14.1668	0.190963	4	0.070444	400	-4.02138	58	1187	-3.10489	500	4
1	28778474	28778974	AT1G76690	+	1669	1	28776595	28777095	AT1G76680	+	875	Yes	Yes	1879	73	0.076494	6722.63	-247.263	0	77	0.123444	4394.05	-264.03	2028	1177	-8.20598	2328.59	-96
2	13863419	13863919	AT2G32690	+	122	2	13858528	13859028	AT2G32670	+	1372	NA	Yes	4891	16	0.070444	1600	-32.5197	0	11	0.070444	1100	-18.8256	115	1400	-2.00367	500	12
1	12381412	12381912	AT1G34042	+	50	1	12371106	12371606	AT1G34030	+	280	NA	Yes	10306	6	0.070444	600	-7.64545	1	3	0.070444	300	-2.54029	64	284	-1.71135	300	2
3	6002551	6003051	AT3G17540	+	77	3	6000076	6000576	AT3G17520	+	899	NA	Yes	2475	15	0.070444	1500	-30.1159	0	10	0.070444	1000	-16.3661	106	896	-2.08283	500	10
2	9326098	9326598	AT2G21880	+	1681	2	9319474	9319974	AT2G21860	+	115	Yes	NA	6624	11	0.070444	1100	-18.8256	0.002257	7	0.070444	700	-9.55497	1785	98	-1.82103	400	6
1	4132971	4133471	AT1G12190	+	1736	1	4125030	4125530	AT1G12150	+	1128	Yes	Yes	7941	9	0.102571	618.108	-13.7228	0.26545	7	0.126627	389.418	-9.40419	1660	1475	-2.09077	228.69	4
2	14394988	14395488	AT2G34110	+	783	2	14383976	14384476	AT2G34050	+	75	Yes	NA	11012	6	0.070444	600	-7.57058	1	4	0.070444	400	-4.01757	1015	62	-0.991309	200	2
1	3284981	3285481	AT1G10060	+	945	1	3280511	3281011	AT1G10050	+	98	Yes	Yes	4470	15	0.070444	1500	-29.8244	0	7	0.070444	700	-9.62217	814	70	-4.73746	800	10
2	16464567	16465067	AT2G39435	+	95	2	16455533	16456033	AT2G39410	+	1342	NA	Yes	9034	9	0.070444	900	-14.0077	0.215503	1	0.070444	100	-0.45532	87	1394	-11.7431	800	-4
1	10207463	10207963	AT1G29200	+	123	1	10194345	10194845	AT1G29170	+	1333	NA	Yes	13118	6	0.070444	600	-7.51393	1	3	0.070444	300	-2.53233	112	1562	-1.70139	300	2
2	11763466	11763966	AT2G27530	+	442	2	11762029	11762529	AT2G27520	+	237	Yes	NA	1437	15	0.070444	1500	-29.23	0	8	0.070444	800	-11.5892	382	215	-3.46033	700	10
1	3076489	3076989	AT1G09530	+	477	1	3066575	3067075	AT1G09500	+	741	Yes	Yes	9914	7	0.070444	700	-9.42613	1	2	0.070444	200	-1.33089	510	821	-4.11344	500	2
2	16464977	16465477	AT2G39435	+	118	2	16458864	16459364	AT2G39415	+	780	NA	Yes	6113	7	0.070444	700	-9.52698	1	1	0.070444	100	-0.456117	114	941	-7.52083	600	-2
1	11437939	11438439	AT1G31870	+	74	1	11434915	11435415	AT1G31860	+	274	NA	Yes	3024	8	0.070444	800	-11.7899	1	1	0.070444	100	-0.454674	73	357	-9.61241	700	-4
1	19125457	19125957	AT1G51580	+	146	1	19124401	19124901	AT1G51570	+	505	Yes	Yes	1056	11	0.070444	1100	-18.736	0.00243	1	0.070444	100	-0.456432	130	541	-16.2984	1000	-6
2	7930027	7930527	AT2G18220	+	44	2	7915093	7915593	AT2G18190	+	1287	NA	Yes	14934	6	0.070444	600	-7.67684	1	1	0.070444	100	-0.448546	29	1302	-5.84421	500	2
1	26872172	26872672	AT1G71290	+	566	1	26871514	26872014	AT1G71280	+	593	Yes	NA	658	18	0.070444	1800	-37.5854	0	9	0.070444	900	-13.7454	596	660	-4.55327	900	14
1	22070163	22070663	AT1G59950	+	804	1	22056017	22056517	AT1G59910	+	44	Yes	NA	14146	6	0.070444	600	-7.67684	1	0	0.070444	0	1.01035	918	49	1.01035	600	2
2	8987975	8988475	AT2G20890	+	1201	2	8986110	8986610	AT2G20880	+	1254	Yes	Yes	1865	43	0.078887	3839.8	-123.236	0	33	0.083538	2782.75	-86.4223	1282	1260	-3.67616	1057.05	48
1	10207965	10208465	AT1G29200	+	127	1	10199052	10199552	AT1G29179	+	962	NA	Yes	8913	9	0.070444	900	-13.9273	0.227961	2	0.070444	200	-1.3309	117	1031	-6.9538	700	-4
1	24614952	24615452	AT1G66130	+	1020	1	24613422	24613922	AT1G66120	+	706	Yes	Yes	1530	48	0.070444	4800	-143.222	0	21	0.070444	2100	-46.6169	960	680	-14.6597	2700	-56
1	29136975	29137475	AT1G77530	+	138	1	29130982	29131482	AT1G77520	+	750	NA	Yes	5993	11	0.070444	1100	-18.7552	0.002392	3	0.070444	300	-2.52958	152	718	-6.96019	800	-6
1	24723948	24724448	AT1G66310	+	1841	1	24702075	24702575	AT1G66270	+	318	Yes	Yes	21873	6	0.070444	600	-7.46102	1	3	0.070444	300	-2.5262	1659	272	-1.6939	300	2
1	20634419	20634919	AT1G55320	+	86	1	20630480	20630980	AT1G55310	+	530	Yes	Yes	3939	9	0.070444	900	-14.0416	0.210432	2	0.070444	200	-1.33091	77	466	-7.02938	700	-4
2	18307029	18307529	AT2G44300	+	275	2	18305468	18305968	AT2G44290	+	1891	Yes	Yes	1561	33	0.070444	3300	-87.9102	0	8	0.070444	800	-11.5817	232	1920	-24.0345	2500	-34
2	1726004	1726504	AT2G04920	+	1555	2	1723979	1724479	AT2G04910	+	123	Yes	NA	2025	36	0.070444	3600	-102.112	0	27	0.070444	2700	-69.0938	1440	101	-3.02522	900	40
1	26726016	26726516	AT1G70890	+	1272	1	26723451	26723951	AT1G70880	+	1434	Yes	Yes	2565	46	0.095543	3391.58	-134.72	0	34	0.113351	2113	-89.914	1490	1471	-6.46054	1278.59	52
1	1829433	1829933	AT1G06040	+	391	1	1824475	1824975	AT1G06020	+	352	Yes	NA	4958	10	0.070444	1000	-16.1144	0.028437	3	0.070444	300	-2.52573	306	306	-5.62499	700	6
1	24281448	24281948	AT1G65360	+	1366	1	24262417	24262917	AT1G65320	+	145	Yes	NA	19031	8	0.070444	800	-11.6389	1	6	0.070444	600	-7.49341	1379	161	-0.932222	200	4
1	24682562	24683062	AT1G66235	+	119	1	24670950	24671450	AT1G66220	+	1397	Yes	Yes	11612	8	0.070444	800	-11.6727	1	2	0.070444	200	-1.33091	93	1524	-5.51465	600	4
3	424004	424504	AT3G02250	+	89	3	420140	420640	AT3G02242	+	1180	NA	Yes	3864	16	0.070444	1600	-32.8811	0	6	0.070444	600	-7.54357	92	1195	-7.02898	1000	-12
1	20369355	20369855	AT1G54550	+	964	1	20360060	20360560	AT1G54510	+	74	Yes	NA	9295	7	0.070444	700	-9.60933	1	0	0.070444	0	1.00691	878	73	1.00691	700	2
1	21146474	21146974	AT1G56460	+	1109	1	21137078	21137578	AT1G56430	+	110	Yes	NA	9396	7	0.070444	700	-9.53692	1	5	0.070444	500	-5.66188	1199	124	-0.957075	200	2
3	207045	207545	AT3G01516	+	134	3	197990	198490	AT3G01500	+	1203	NA	Yes	9055	11	0.070444	1100	-18.7656	0.002372	4	0.070444	400	-3.98912	130	1588	-4.94273	700	6
2	13814973	13815473	AT2G32540	+	956	2	13810914	13811414	AT2G32530	+	91	Yes	Yes	4059	10	0.070444	1000	-16.4275	0.022185	2	0.070444	200	-1.33095	1087	45	-8.87696	800	-6
3	1906990	1907490	AT3G06290	+	1059	3	1897408	1897908	AT3G06270	+	36	Yes	NA	9582	6	0.070444	600	-7.73621	1	4	0.070444	400	-4.05311	1150	38	-0.991657	200	2
2	9280579	9281079	AT2G21730	+	493	2	9274030	9274530	AT2G21720	+	74	Yes	NA	6549	7	0.070444	700	-9.60933	1	1	0.070444	100	-0.453961	506	62	-7.60166	600	-2
3	6044908	6045408	AT3G17690	+	1022	3	6041004	6041504	AT3G17670	+	65	Yes	NA	3904	16	0.070444	1600	-33.399	0	4	0.070444	400	-4.01422	1005	66	-11.7902	1200	-12
2	10993003	10993503	AT2G25770	+	1888	2	10980430	10980930	AT2G25740	+	58	Yes	NA	12573	8	0.070444	800	-11.878	1	0	0	0	0	0	0	0	800	4
1	1689032	1689532	AT1G05640	+	736	1	1681470	1681970	AT1G05620	+	63	Yes	NA	7562	6	0.070444	600	-7.59879	1	2	0.070444	200	-1.33093	817	55	-3.00958	400	2
1	4145027	4145527	AT1G12220	+	110	1	4126396	4126896	AT1G12160	+	1788	NA	Yes	18631	9	0.070444	900	-13.964	0.222206	1	0.070444	100	-0.455667	97	1691	-11.716	800	-4
1	8893011	8893511	AT1G25350	+	37	1	8881568	8882068	AT1G25330	+	1069	NA	Yes	11443	6	0.070444	600	-7.72728	1	2	0.070444	200	-1.33099	35	1169	-3.05021	400	2
1	12459436	12459936	AT1G34210	+	58	1	12452055	12452555	AT1G34190	+	755	NA	Yes	7381	8	0.070444	800	-11.878	1	3	0.070444	300	-2.54464	52	826	-3.53695	500	4
2	9902475	9902975	AT2G23270	+	38	2	9895905	9896405	AT2G23240	+	1226	NA	Yes	6570	8	0.070444	800	-12.1022	1	4	0.070444	400	-4.03866	45	1154	-2.29429	400	4
1	7280380	7280880	AT1G20910	+	601	1	7273509	7274009	AT1G20900	+	48	Yes	NA	6871	6	0.070444	600	-7.65499	1	3	0.070444	300	-2.54659	710	48	-1.71943	300	2
2	9280597	9281097	AT2G21730	+	493	2	9277472	9277972	AT2G21725	+	109	Yes	Yes	3125	7	0.070444	700	-9.53827	1	3	0.070444	300	-2.53448	506	93	-2.51825	400	2
2	7310485	7310985	AT2G16870	+	855	2	7301607	7302107	AT2G16850	+	70	Yes	NA	8878	6	0.070444	600	-7.58112	1	2	0.070444	200	-1.33091	599	91	-2.98285	400	2
1	21685923	21686423	AT1G58370	+	68	1	21676485	21676985	AT1G58360	+	813	NA	Yes	9438	6	0.070444	600	-7.58578	1	2	0.070444	200	-1.33092	67	984	-2.99735	400	2
2	9279837	9280337	AT2G21730	+	679	2	9278577	9279077	AT2G21727	+	64	Yes	Yes	1260	12	0.070444	1200	-21.8402	0.000131	7	0.070444	700	-9.75766	675	45	-2.51997	500	8
1	24117593	24118093	AT1G64920	+	1002	1	24110913	24111413	AT1G64890	+	51	Yes	NA	6680	8	0.070444	800	-11.9351	1	2	0.070444	200	-1.33096	890	44	-5.65774	600	4
1	24945581	24946081	AT1G66870	+	980	1	24936875	24937375	AT1G66850	+	219	Yes	NA	8706	7	0.070444	700	-9.46475	1	4	0.070444	400	-3.98893	1012	131	-1.54921	300	2
1	5456463	5456963	AT1G15860	+	41	1	5435953	5436453	AT1G15780	+	1812	NA	Yes	20510	6	0.070444	600	-7.69621	1	0	0	0	0	0	0	0	600	2
1	12264539	12265039	AT1G33810	+	81	1	12256392	12256892	AT1G33790	+	1075	NA	Yes	8147	6	0.070444	600	-7.55971	1	5	0.070444	500	-5.67725	96	1209	-0.572325	100	2
1	24944996	24945496	AT1G66870	+	134	1	24938175	24938675	AT1G66852	+	555	Yes	Yes	6821	6	0.070444	600	-7.50677	1	3	0.070444	300	-2.52929	158	663	-1.69765	300	2
1	23888655	23889155	AT1G64370	+	778	1	23881502	23882002	AT1G64350	+	104	Yes	NA	7153	12	0.070444	1200	-21.4648	0.000184	8	0.070444	800	-11.6666	837	123	-1.72976	400	8
1	600954	601454	AT1G02740	+	24	1	592448	592948	AT1G02720	+	1755	NA	Yes	8506	6	0.070444	600	-7.90837	1	1	0.070444	100	-0.444636	21	1898	-5.94361	500	2
1	3902550	3903050	AT1G11600	+	1686	1	3889976	3890476	AT1G11580	+	287	Yes	Yes	12574	8	0.070444	800	-11.5636	1	2	0.070444	200	-1.33089	1722	253	-5.43871	600	4
2	8998507	8999007	AT2G20920	+	86	2	8988426	8988926	AT2G20890	+	798	NA	Yes	10081	7	0.070444	700	-9.57823	1	5	0.070444	500	-5.67946	93	880	-0.957127	200	2
1	7925365	7925865	AT1G22450	+	151	1	7919017	7919517	AT1G22430	+	765	NA	Yes	6348	7	0.070444	700	-9.49731	1	4	0.070444	400	-3.98665	144	736	-1.54814	300	2
1	24708368	24708868	AT1G66280	+	291	1	24702010	24702510	AT1G66270	+	318	Yes	Yes	6358	6	0.070444	600	-7.46408	1	1	0.070444	100	-0.457604	282	272	-5.63361	500	2
1	29195021	29195521	AT1G77680	+	909	1	29188990	29189490	AT1G77670	+	126	Yes	NA	6031	13	0.070444	1300	-24.0268	1.6e-05	5	0.070444	500	-5.66064	919	127	-5.40038	800	8
1	5394017	5394517	AT1G15680	+	59	1	5378954	5379454	AT1G15640	+	1019	NA	Yes	15063	6	0.070444	600	-7.61086	1	3	0.070444	300	-2.53821	72	1060	-1.70872	300	2
3	2257115	2257615	AT3G07130	+	483	3	2252478	2252978	AT3G07110	+	61	Yes	NA	4637	11	0.070444	1100	-19.2157	0.001608	5	0.070444	500	-5.72695	439	56	-3.67617	600	6
2	13288006	13288506	AT2G31180	+	1282	2	13277973	13278473	AT2G31160	+	1276	Yes	Yes	10033	10	0.085685	822.133	-16.0385	0.030229	3	0.076712	275.489	-2.52306	1410	1052	-4.44123	546.644	6
3	2827395	2827895	AT3G09220	+	497	3	2819998	2820498	AT3G09180	+	103	Yes	NA	7397	6	0.070444	600	-7.53096	1	0	0.070444	0	1.00381	387	132	1.00381	600	2
3	675551	676051	AT3G02990	+	164	3	669987	670487	AT3G02970	+	967	NA	Yes	5564	9	0.070444	900	-13.8744	0.236592	4	0.070444	400	-3.98649	145	912	-3.02318	500	4
2	18364617	18365117	AT2G44490	+	1681	2	18361470	18361970	AT2G44480	+	122	Yes	NA	3147	21	0.070444	2100	-47.9996	0	13	0.070444	1300	-24.0313	1694	125	-3.37851	800	18
1	11000594	11001094	AT1G30910	+	920	1	10994889	10995389	AT1G30890	+	62	Yes	NA	5705	8	0.070444	800	-11.8515	1	3	0.070444	300	-2.5442	903	53	-3.53407	500	4
1	22678477	22678977	AT1G61470	+	1062	1	22672909	22673409	AT1G61450	+	109	Yes	NA	5568	10	0.070444	1000	-16.356	0.023462	9	0.070444	900	-13.937	1236	122	-0.598889	100	6
3	2213559	2214059	AT3G07010	+	140	3	2202150	2202650	AT3G06980	+	704	NA	Yes	11409	6	0.070444	600	-7.50334	1	2	0.070444	200	-1.3309	157	662	-2.96624	400	2
3	1113089	1113589	AT3G04230	+	154	3	1108039	1108539	AT3G04210	+	821	NA	Yes	5050	16	0.070444	1600	-32.3233	0	10	0.070444	1000	-16.2429	160	963	-2.56699	600	12
1	986098	986598	AT1G03880	+	148	1	977003	977503	AT1G03850	+	1805	NA	Yes	9095	6	0.070444	600	-7.49922	1	3	0.070444	300	-2.52938	156	1901	-1.69777	300	2
2	10903980	10904480	AT2G25620	+	69	2	10894564	10895064	AT2G25600	+	1360	NA	Yes	9416	12	0.070444	1200	-21.7677	0.00014	6	0.070444	600	-7.56865	76	1459	-3.32418	600	8
3	4048067	4048567	AT3G12730	+	1068	3	4037467	4037967	AT3G12700	+	86	Yes	NA	10600	6	0.070444	600	-7.55185	1	3	0.070444	300	-2.53821	1033	72	-1.70872	300	2
2	7388555	7389055	AT2G17000	+	52	2	7376600	7377100	AT2G16980	+	1260	NA	Yes	11955	9	0.070444	900	-14.2831	0.172462	6	0.070444	600	-7.65499	48	1300	-1.40116	300	4
2	7255541	7256041	AT2G16720	+	842	2	7250005	7250505	AT2G16710	+	29	Yes	NA	5536	9	0.070444	900	-14.8146	0.102688	5	0.070444	500	-5.85327	1024	28	-2.18851	400	4
2	15290871	15291371	AT2G36430	+	784	2	15286400	15286900	AT2G36420	+	65	Yes	NA	4471	6	0.070444	600	-7.59334	1	1	0.070444	100	-0.450048	975	34	-5.80749	500	2
1	10207534	10208034	AT1G29200	+	123	1	10200549	10201049	AT1G29180	+	1499	NA	Yes	6985	13	0.070444	1300	-24.0407	1.6e-05	5	0.070444	500	-5.66751	112	1456	-5.42734	800	8
1	27497027	27497527	AT1G73120	+	955	1	27493027	27493527	AT1G73100	+	156	Yes	NA	4000	19	0.070444	1900	-41.3181	0	4	0.070444	400	-3.9873	882	140	-15.9138	1500	-16
2	13909979	13910479	AT2G32795	+	1249	2	13899430	13899930	AT2G32780	+	72	Yes	NA	10549	7	0.070444	700	-9.61557	1	2	0.070444	200	-1.33093	1153	54	-4.22887	500	2
1	25007018	25007518	AT1G67000	+	1194	1	25000506	25001006	AT1G66980	+	77	Yes	NA	6512	6	0.070444	600	-7.56677	1	2	0.070444	200	-1.33092	1192	64	-2.99996	400	2
1	13026474	13026974	AT1G35420	+	784	1	12984031	12984531	AT1G35350	+	996	Yes	Yes	42443	6	0.070444	600	-7.44152	1	3	0.070444	300	-2.52351	745	1023	-1.69066	300	2
2	13910018	13910518	AT2G32795	+	1249	2	13904558	13905058	AT2G32788	+	58	Yes	NA	5460	12	0.070444	1200	-21.9451	0.000119	9	0.070444	900	-14.2712	1153	53	-1.26546	300	8
2	12407017	12407517	AT2G28890	+	103	2	12370016	12370516	AT2G28830	+	1240	NA	Yes	37001	6	0.070444	600	-7.53096	1	0	0.070444	0	1.00409	123	1303	1.00409	600	2
1	29745062	29745562	AT1G79070	+	140	1	29738892	29739392	AT1G79050	+	341	NA	Yes	6170	6	0.070444	600	-7.50334	1	4	0.070444	400	-3.98502	155	312	-0.991144	200	2
1	5985971	5986471	AT1G17440	+	71	1	5977566	5978066	AT1G17420	+	1900	NA	Yes	8405	15	0.070444	1500	-30.2338	0	4	0.070444	400	-4.03381	48	1950	-10.6201	1100	-10
1	17952010	17952510	AT1G48550	+	80	1	17943541	17944041	AT1G48530	+	494	NA	Yes	8469	6	0.070444	600	-7.56141	1	2	0.070444	200	-1.33092	73	555	-2.99279	400	2
1	4057955	4058455	AT1G12013	+	71	1	4048113	4048613	AT1G11990	+	1462	NA	Yes	9842	7	0.070444	700	-9.61882	1	4	0.070444	400	-4.00687	77	1301	-1.55776	300	2
3	3561897	3562397	AT3G11370	+	1589	3	3549999	3550499	AT3G11325	+	71	Yes	NA	11898	6	0.070444	600	-7.57889	1	2	0.070444	200	-1.33091	1332	75	-2.99145	400	2
1	27137593	27138093	AT1G72130	+	409	1	27132017	27132517	AT1G72120	+	1574	Yes	Yes	5576	16	0.070444	1600	-31.873	0	5	0.070444	500	-5.62774	363	1566	-8.52599	1100	-12
1	1828516	1829016	AT1G06040	+	332	1	1827405	1827905	AT1G06030	+	1772	Yes	Yes	1111	80	0.070444	8000	-284.808	0	59	0.070444	5900	-190.478	354	1733	-5.63112	2100	112
1	24281893	24282393	AT1G65360	+	1101	1	24266912	24267412	AT1G65330	+	116	Yes	NA	14981	10	0.070444	1000	-16.3344	0.023844	4	0.070444	400	-3.99492	1093	106	-3.95673	600	6
1	24683444	24683944	AT1G66235	+	1267	1	24677087	24677587	AT1G66230	+	95	Yes	NA	6357	10	0.070444	1000	-16.4092	0.022506	1	0.070444	100	-0.455158	1175	83	-14.0546	900	-6
1	8323918	8324418	AT1G23440	+	68	1	8315413	8315913	AT1G23410	+	652	NA	Yes	8505	8	0.070444	800	-11.8178	1	3	0.070444	300	-2.54029	64	776	-3.50875	500	4
1	20369467	20369967	AT1G54550	+	964	1	20364529	20365029	AT1G54520	+	238	Yes	Yes	4938	10	0.070444	1000	-16.1653	0.02726	2	0.070444	200	-1.33089	878	239	-8.43799	800	-6
1	27136978	27137478	AT1G72130	+	97	1	27134032	27134532	AT1G72125	+	1733	Yes	Yes	2946	13	0.070444	1300	-24.1995	1.4e-05	4	0.070444	400	-4.02699	53	1701	-7.62799	900	-8
1	4298627	4299127	AT1G12630	+	1203	1	4286992	4287492	AT1G12600	+	63	Yes	NA	11635	9	0.070444	900	-14.1747	0.189735	3	0.070444	300	-2.54337	1392	55	-4.6458	600	4
1	27924470	27924970	AT1G74260	+	51	1	27914966	27915466	AT1G74230	+	1201	NA	Yes	9504	9	0.070444	900	-14.2954	0.170504	3	0.070444	300	-2.55831	33	1322	-4.81113	600	4
3	207396	207896	AT3G01516	+	179	3	198920	199420	AT3G01510	+	609	NA	Yes	8476	7	0.070444	700	-9.48086	1	3	0.070444	300	-2.5278	198	823	-2.49646	400	2
1	25282570	25283070	AT1G67490	+	73	1	25265085	25265585	AT1G67440	+	963	NA	Yes	17485	7	0.070444	700	-9.61241	1	6	0.070444	600	-7.56315	79	980	-0.578582	100	2
2	1152927	1153427	AT2G03780	+	71	2	1132056	1132556	AT2G03720	+	893	NA	Yes	20871	6	0.070444	600	-7.57889	1	2	0.070444	200	-1.33091	92	973	-2.98242	400	2
3	6045846	6046346	AT3G17690	+	566	3	6043510	6044010	AT3G17680	+	49	Yes	NA	2336	9	0.070444	900	-14.3218	0.166357	3	0.070444	300	-2.5477	522	46	-4.69229	600	4
1	4144985	4145485	AT1G12220	+	110	1	4128527	4129027	AT1G12170	+	1314	NA	Yes	16458	6	0.070444	600	-7.52428	1	2	0.070444	200	-1.33091	97	1472	-2.98038	400	2
1	1689349	1689849	AT1G05640	+	478	1	1682528	1683028	AT1G05630	+	62	Yes	NA	6821	9	0.070444	900	-14.1828	0.188453	1	0.070444	100	-0.452703	413	49	-11.9546	800	-4
1	22429632	22430132	AT1G60920	+	677	1	22428081	22428581	AT1G60910	+	49	Yes	NA	1551	12	0.070444	1200	-22.1561	9.7e-05	5	0.070444	500	-5.77196	746	41	-4.77177	700	8
2	7311448	7311948	AT2G16870	+	1353	2	7306045	7306545	AT2G16860	+	50	Yes	NA	5403	7	0.070444	700	-9.71906	1	2	0.070444	200	-1.33106	1105	27	-4.37378	500	2
1	19138029	19138529	AT1G51610	+	64	1	19126126	19126626	AT1G51580	+	1347	NA	Yes	11903	12	0.070444	1200	-21.8402	0.000131	3	0.070444	300	-2.54223	58	1555	-8.69119	900	-8
1	26882507	26883007	AT1G71320	+	87	1	26872553	26873053	AT1G71290	+	1334	NA	Yes	9954	11	0.070444	1100	-18.9643	0.002013	9	0.070444	900	-14.0416	86	1351	-0.885622	200	6
3	4964942	4965442	AT3G14790	+	57	3	4959022	4959522	AT3G14770	+	1902	NA	Yes	5920	15	0.070444	1500	-30.6166	0	9	0.070444	900	-14.0785	78	1941	-2.78579	600	12
1	27776338	27776838	AT1G73860	+	359	1	27759998	27760498	AT1G73830	+	741	Yes	Yes	16340	6	0.070444	600	-7.45726	1	2	0.070444	200	-1.33089	320	879	-2.95483	400	2
1	12287926	12288426	AT1G33850	+	837	1	12281030	12281530	AT1G33830	+	623	Yes	Yes	6896	10	0.070444	1000	-16.0687	0.029509	7	0.070444	700	-9.41808	1097	634	-1.30866	300	6
1	26773043	26773543	AT1G71002	+	995	1	26769561	26770061	AT1G71000	+	92	Yes	NA	3482	15	0.070444	1500	-29.8932	0	10	0.070444	1000	-16.4424	882	88	-2.10236	500	10
1	2204515	2205015	AT1G07180	+	1645	1	2198498	2198998	AT1G07160	+	52	Yes	NA	6017	9	0.070444	900	-14.2831	0.172462	6	0.070444	600	-7.64545	1979	50	-1.39939	300	4
1	28217834	28218334	AT1G75180	+	501	1	28214982	28215482	AT1G75170	+	51	Yes	NA	2852	11	0.070444	1100	-19.387	0.001365	2	0.070444	200	-1.33099	568	36	-10.8895	900	-6
1	3902493	3902993	AT1G11600	+	1686	1	3894480	3894980	AT1G11590	+	83	Yes	NA	8013	7	0.070444	700	-9.58513	1	5	0.070444	500	-5.69313	1722	78	-0.957177	200	2
1	23888897	23889397	AT1G64370	+	801	1	23887490	23887990	AT1G64360	+	330	Yes	Yes	1407	23	0.070444	2300	-53.2835	0	12	0.070444	1200	-21.0568	916	376	-5.24148	1100	20
1	3133956	3134456	AT1G09680	+	66	1	3132603	3133103	AT1G09665	+	523	NA	Yes	1353	15	0.070444	1500	-30.35	0	5	0.070444	500	-5.70155	71	456	-7.8651	1000	-10
1	26736676	26737176	AT1G70920	+	88	1	26725591	26726091	AT1G70890	+	1646	NA	Yes	11085	6	0.070444	600	-7.54896	1	3	0.070444	300	-2.53243	111	1780	-1.70151	300	2
1	3902492	3902992	AT1G11600	+	1686	1	3895869	3896369	AT1G11592	+	173	Yes	NA	6623	16	0.070444	1600	-32.2424	0	6	0.070444	600	-7.50021	1722	146	-6.84893	1000	12
1	3902545	3903045	AT1G11600	+	1686	1	3898000	3898500	AT1G11593	+	102	Yes	NA	4545	23	0.070444	2300	-55.0379	0	12	0.070444	1200	-21.5797	1722	87	-5.786	1100	20
1	27676460	27676960	AT1G73607	+	48	1	27670073	27670573	AT1G73600	+	503	NA	Yes	6387	6	0.070444	600	-7.65499	1	1	0.070444	100	-0.450048	34	586	-5.80749	500	2
2	13286559	13287059	AT2G31180	+	192	2	13284617	13285117	AT2G31170	+	1097	Yes	Yes	1942	21	0.070444	2100	-47.3665	0	6	0.070444	600	-7.48082	199	1089	-12.6663	1500	-18
2	16501417	16501917	AT2G39550	+	1300	2	16491436	16491936	AT2G39510	+	271	Yes	Yes	9981	6	0.070444	600	-7.46675	1	2	0.070444	200	-1.33089	1421	271	-2.95681	400	2
1	22678895	22679395	AT1G61470	+	684	1	22677069	22677569	AT1G61460	+	416	Yes	NA	1826	15	0.070444	1500	-29.0577	0	5	0.070444	500	-5.62687	567	382	-7.3684	1000	-10
3	2215957	2216457	AT3G07010	+	67	3	2206528	2207028	AT3G06990	+	1565	NA	Yes	9429	6	0.070444	600	-7.58823	1	1	0.070444	100	-0.454502	70	1571	-5.70289	500	2
1	21716073	21716573	AT1G58440	+	457	1	21699084	21699584	AT1G58400	+	817	Yes	Yes	16989	7	0.070444	700	-9.42755	1	3	0.070444	300	-2.52557	319	770	-2.48935	400	2
2	16501461	16501961	AT2G39550	+	1300	2	16495994	16496494	AT2G39518	+	424	Yes	Yes	5467	19	0.070444	1900	-40.6566	0	13	0.070444	1300	-23.6171	1421	484	-2.23923	600	14
2	14420996	14421496	AT2G34150	+	78	2	14413053	14413553	AT2G34100	+	1729	NA	Yes	7943	16	0.070444	1600	-33.0754	0	7	0.070444	700	-9.63664	66	1871	-5.69949	900	12
1	26275313	26275813	AT1G69800	+	919	1	26254509	26255009	AT1G69770	+	47	Yes	NA	20804	6	0.070444	600	-7.66008	1	4	0.070444	400	-4.02825	1047	52	-0.991395	200	2
1	21698492	21698992	AT1G58400	+	1020	1	21688032	21688532	AT1G58370	+	104	Yes	NA	10460	8	0.070444	800	-11.7002	1	3	0.070444	300	-2.53109	1048	127	-3.45098	500	4
1	4132943	4133443	AT1G12190	+	1736	1	4129404	4129904	AT1G12170	+	544	Yes	Yes	3539	9	0.070444	900	-13.7501	0.260266	4	0.070444	400	-3.96915	1660	621	-2.98465	500	4
1	18183052	18183552	AT1G49170	+	164	1	18172044	18172544	AT1G49110	+	884	NA	Yes	11008	7	0.070444	700	-9.48896	1	2	0.070444	200	-1.3309	222	979	-4.1304	500	2
1	1732961	1733461	AT1G05790	+	114	1	1726853	1727353	AT1G05780	+	997	NA	Yes	6108	7	0.070444	700	-9.53177	1	1	0.070444	100	-0.455281	86	1018	-7.55185	600	-2
2	14395018	14395518	AT2G34110	+	783	2	14387487	14387987	AT2G34070	+	123	Yes	NA	7531	9	0.070444	900	-13.935	0.226707	3	0.070444	300	-2.53163	1015	120	-4.52498	600	4
1	19281958	19282458	AT1G51900	+	1295	1	19224935	19225435	AT1G51805	+	148	Yes	NA	57023	6	0.070444	600	-7.49922	1	4	0.070444	400	-3.98502	1262	155	-0.991144	200	2
3	4047527	4048027	AT3G12730	+	1097	3	4041480	4041980	AT3G12710	+	872	Yes	Yes	6047	13	0.070444	1300	-23.555	2.4e-05	7	0.070444	700	-9.41447	1064	744	-2.94699	600	8
2	7325537	7326037	AT2G16900	+	36	2	7311460	7311960	AT2G16870	+	1353	NA	Yes	14077	6	0.070444	600	-7.73621	1	2	0.070444	200	-1.33094	49	1105	-3.01808	400	2
1	1736364	1736864	AT1G05790	+	83	1	1730494	1730994	AT1G05785	+	1354	NA	Yes	5870	12	0.070444	1200	-21.614	0.000161	3	0.070444	300	-2.53844	71	1262	-8.58134	900	-8
1	29076431	29076931	AT1G77380	+	1727	1	29054507	29055007	AT1G77310	+	60	Yes	NA	21924	6	0.070444	600	-7.60769	1	4	0.070444	400	-4.01669	1779	63	-0.991303	200	2
2	13909985	13910485	AT2G32795	+	1249	2	13905535	13906035	AT2G32790	+	144	Yes	NA	4450	20	0.070444	2000	-44.5411	0	8	0.070444	800	-11.6318	1153	152	-7.75033	1200	-16
1	27497068	27497568	AT1G73120	+	955	1	27494400	27494900	AT1G73110	+	129	Yes	Yes	2668	13	0.070444	1300	-24.0135	1.6e-05	4	0.070444	400	-3.99553	882	104	-7.29782	900	-8
2	16922991	16923491	AT2G40520	+	1257	2	16916044	16916544	AT2G40500	+	63	Yes	NA	6947	6	0.070444	600	-7.59879	1	0	0.070444	0	1.00711	1351	71	1.00711	600	2
2	12487497	12487997	AT2G29070	+	147	2	12482377	12482877	AT2G29060	+	1336	NA	Yes	5120	8	0.070444	800	-11.6368	1	3	0.070444	300	-2.52948	154	1016	-3.44108	500	4
1	8658382	8658882	AT1G24430	+	514	1	8653511	8654011	AT1G24400	+	63	Yes	NA	4871	9	0.070444	900	-14.1747	0.189735	1	0.070444	100	-0.452021	423	44	-12.0118	800	-4
1	27986479	27986979	AT1G74458	+	253	1	27975325	27975825	AT1G74430	+	1097	NA	Yes	11154	6	0.070444	600	-7.46951	1	4	0.070444	400	-3.97559	279	1198	-0.991123	200	2
1	25884891	25885391	AT1G68850	+	421	1	25870027	25870527	AT1G68825	+	1223	Yes	Yes	14864	12	0.070444	1200	-21.0407	0.000267	8	0.070444	800	-11.5399	417	1432	-1.70275	400	8
1	8658117	8658617	AT1G24430	+	995	1	8655002	8655502	AT1G24405	+	111	Yes	NA	3115	15	0.070444	1500	-29.7022	0	8	0.070444	800	-11.7664	873	80	-3.62127	700	10
3	3561917	3562417	AT3G11370	+	1589	3	3552955	3553455	AT3G11330	+	47	Yes	NA	8962	7	0.070444	700	-9.74117	1	2	0.070444	200	-1.33095	1332	47	-4.24932	500	2
1	2029427	2029927	AT1G06630	+	43	1	2025485	2025985	AT1G06620	+	860	NA	Yes	3942	7	0.070444	700	-9.7758	1	3	0.070444	300	-2.54298	56	974	-2.54675	400	2
1	26447537	26448037	AT1G70220	+	1833	1	26439979	26440479	AT1G70210	+	193	Yes	NA	7558	27	0.070444	2700	-67.2967	0	5	0.070444	500	-5.6436	1837	191	-25.3981	2200	-26
1	23531391	23531891	AT1G63450	+	1520	1	23515925	23516425	AT1G63420	+	82	Yes	NA	15466	8	0.070444	800	-11.7593	1	3	0.070444	300	-2.53262	1630	109	-3.46041	500	4
2	11140905	11141405	AT2G26170	+	50	2	11139400	11139900	AT2G26160	+	572	NA	Yes	1505	11	0.070444	1100	-19.4083	0.001337	2	0.070444	200	-1.331	33	800	-10.9861	900	-6
1	24521056	24521556	AT1G65910	+	79	1	24513595	24514095	AT1G65890	+	1196	NA	Yes	7461	7	0.070444	700	-9.59518	1	0	0.070444	0	1.00888	57	1235	1.00888	700	2
1	24281500	24282000	AT1G65360	+	1366	1	24268982	24269482	AT1G65340	+	177	Yes	NA	12518	13	0.070444	1300	-23.8643	1.8e-05	10	0.070444	1000	-16.3007	1379	129	-1.20905	300	8
1	8323359	8323859	AT1G23440	+	54	1	8317080	8317580	AT1G23420	+	531	NA	Yes	6279	6	0.070444	600	-7.62858	1	4	0.070444	400	-4.01941	60	634	-0.991323	200	2
2	9341490	9341990	AT2G21910	+	1463	2	9326065	9326565	AT2G21880	+	1681	Yes	Yes	15425	18	0.128818	984.332	-37.4352	0	9	0.129516	489.514	-13.7178	1403	1785	-4.52255	494.818	14
1	7408058	7408558	AT1G21160	+	97	1	7387564	7388064	AT1G21100	+	1449	NA	Yes	20494	9	0.070444	900	-14.0011	0.216462	3	0.070444	300	-2.53215	114	1454	-4.53013	600	4
1	26967075	26967575	AT1G71696	+	1893	1	26945481	26945981	AT1G71680	+	1150	Yes	Yes	21594	10	0.114028	617.778	-16.0417	0.030146	0	0	0	0	0	0	0	617.778	6
1	30365601	30366101	AT1G80810	+	1566	1	30357482	30357982	AT1G80770	+	37	Yes	NA	8119	6	0.070444	600	-7.72728	1	5	0.070444	500	-5.71353	1734	63	-0.567762	100	2
1	25444891	25445391	AT1G67860	+	546	1	25438917	25439417	AT1G67850	+	101	Yes	NA	5974	7	0.070444	700	-9.55005	1	1	0.070444	100	-0.456117	499	114	-7.52083	600	-2
1	21145926	21146426	AT1G56460	+	557	1	21142468	21142968	AT1G56450	+	79	Yes	NA	3458	10	0.070444	1000	-16.4942	0.021017	3	0.070444	300	-2.54029	557	64	-5.84142	700	6
1	19758556	19759056	AT1G53025	+	1557	1	19736520	19737020	AT1G52970	+	61	Yes	NA	22036	6	0.070444	600	-7.60462	1	1	0.070444	100	-0.454618	1522	72	-5.70024	500	2
1	25281964	25282464	AT1G67490	+	71	1	25266980	25267480	AT1G67450	+	423	NA	Yes	14984	7	0.070444	700	-9.61882	1	1	0.070444	100	-0.454833	76	418	-7.56865	600	-2
2	10993015	10993515	AT2G25770	+	1888	2	10985036	10985536	AT2G25760	+	51	Yes	NA	7979	6	0.070444	600	-7.64097	1	0	0	0	0	0	0	0	600	2
1	9544573	9545073	AT1G27480	+	1804	1	9533040	9533540	AT1G27450	+	27	Yes	NA	11533	6	0.070444	600	-7.84946	1	4	0.070444	400	-4.10309	1910	25	-0.992449	200	2
1	4145438	4145938	AT1G12220	+	67	1	4130871	4131371	AT1G12180	+	1012	NA	Yes	14567	6	0.070444	600	-7.58823	1	2	0.070444	200	-1.33091	85	1183	-2.98568	400	2
1	25444970	25445470	AT1G67860	+	546	1	25442900	25443400	AT1G67856	+	403	Yes	Yes	2070	19	0.070444	1900	-40.6761	0	6	0.070444	600	-7.4491	499	521	-9.91367	1300	-16
1	25281981	25282481	AT1G67490	+	71	1	25267881	25268381	AT1G67455	+	1144	NA	Yes	14100	8	0.070444	800	-11.8033	1	1	0.070444	100	-0.454833	76	1053	-9.60344	700	-4
1	5066932	5067432	AT1G14720	+	78	1	5048547	5049047	AT1G14687	+	1202	NA	Yes	18385	7	0.070444	700	-9.59786	1	2	0.070444	200	-1.33092	62	1111	-4.21145	500	2
1	27775944	27776444	AT1G73860	+	1137	1	27765655	27766155	AT1G73840	+	77	Yes	NA	10289	7	0.070444	700	-9.60061	1	1	0.070444	100	-0.453358	1134	55	-7.62477	600	-2
3	3225532	3226032	AT3G10380	+	39	3	3215486	3215986	AT3G10360	+	1251	NA	Yes	10046	6	0.070444	600	-7.71089	1	2	0.070444	200	-1.33092	68	1631	-2.99653	400	2
1	10286992	10287492	AT1G29390	+	618	1	10284583	10285083	AT1G29380	+	59	Yes	NA	2409	12	0.070444	1200	-21.926	0.000121	5	0.070444	500	-5.77623	596	40	-4.7862	700	8
2	11527368	11527868	AT2G27010	+	768	2	11525088	11525588	AT2G27000	+	439	Yes	Yes	2280	22	0.070444	2200	-49.915	0	8	0.070444	800	-11.5702	670	264	-9.5947	1400	-18
1	2204381	2204881	AT1G07180	+	1645	1	2201008	2201508	AT1G07170	+	26	Yes	NA	3373	6	0.070444	600	-7.86742	1	4	0.070444	400	-4.06117	1979	35	-0.99176	200	2
3	6434003	6434503	AT3G18710	+	55	3	6426418	6426918	AT3G18670	+	1351	NA	Yes	7585	6	0.070444	600	-7.62477	1	1	0.070444	100	-0.452448	47	1238	-5.75034	500	2
3	5439127	5439627	AT3G16030	+	311	3	5438402	5438902	AT3G16020	+	68	Yes	NA	725	8	0.070444	800	-11.8178	1	1	0.070444	100	-0.455025	186	80	-9.59257	700	-4
3	6373509	6374009	AT3G18530	+	58	3	6372076	6372576	AT3G18524	+	638	NA	Yes	1433	9	0.070444	900	-14.2185	0.182739	6	0.070444	600	-7.58578	68	468	-1.38864	300	4
1	2204313	2204813	AT1G07180	+	1645	1	2201998	2202498	AT1G07175	+	35	Yes	NA	2315	7	0.070444	700	-9.87097	1	1	0.070444	100	-0.446411	1979	24	-7.90837	600	-2
1	26756374	26756874	AT1G70960	+	149	1	26749081	26749581	AT1G70944	+	1618	NA	Yes	7293	12	0.070444	1200	-21.2912	0.000214	2	0.070444	200	-1.3309	125	1776	-12.0042	1000	-8
2	16503491	16503991	AT2G39550	+	331	2	16497107	16497607	AT2G39520	+	1143	Yes	Yes	6384	10	0.070444	1000	-16.1211	0.028274	8	0.070444	800	-11.5582	309	1365	-0.89785	200	6
1	26757030	26757530	AT1G70960	+	103	1	26752148	26752648	AT1G70949	+	793	NA	Yes	4882	7	0.070444	700	-9.54692	1	2	0.070444	200	-1.3309	109	791	-4.16224	500	2
1	24224486	24224986	AT1G65210	+	108	1	24222413	24222913	AT1G65200	+	1294	NA	Yes	2073	25	0.070444	2500	-61.7609	0	15	0.070444	1500	-29.6941	112	1398	-4.36997	1000	24
2	16492110	16492610	AT2G39510	+	1208	2	16487589	16488089	AT2G39490	+	107	Yes	NA	4521	10	0.070444	1000	-16.3627	0.023341	6	0.070444	600	-7.51322	1216	124	-1.91335	400	6
2	19476527	19477027	AT2G47460	+	987	2	19462963	19463463	AT2G47430	+	47	Yes	NA	13564	7	0.070444	700	-9.74117	1	5	0.070444	500	-5.75034	849	47	-0.957492	200	2
2	11006522	11007022	AT2G25800	+	90	2	10993076	10993576	AT2G25770	+	1888	NA	Yes	13446	13	0.070444	1300	-24.2589	1.3e-05	0	0	0	0	0	0	0	1300	8
1	4132624	4133124	AT1G12190	+	185	1	4130885	4131385	AT1G12180	+	1012	Yes	Yes	1739	18	0.070444	1800	-38.1062	0	7	0.070444	700	-9.46966	205	1183	-7.19451	1100	-14
1	5518474	5518974	AT1G16110	+	1392	1	5511108	5511608	AT1G16060	+	59	Yes	NA	7366	6	0.070444	600	-7.61086	1	5	0.070444	500	-5.72482	1464	57	-0.566338	100	2
1	5051395	5051895	AT1G14690	+	116	1	5043158	5043658	AT1G14685	+	921	NA	Yes	8237	6	0.070444	600	-7.5192	1	3	0.070444	300	-2.53314	104	985	-1.70239	300	2
3	4047993	4048493	AT3G12730	+	1068	3	4044002	4044502	AT3G12720	+	1158	Yes	Yes	3991	27	0.070444	2700	-65.8287	0	15	0.070444	1500	-28.924	1033	1085	-5.14512	1200	24
2	11816969	11817469	AT2G27710	+	60	2	11809154	11809654	AT2G27690	+	1206	NA	Yes	7815	6	0.070444	600	-7.60769	1	1	0.070444	100	-0.451351	40	1227	-5.77623	500	2
1	5052017	5052517	AT1G14690	+	79	1	5048499	5048999	AT1G14687	+	1202	NA	Yes	3518	17	0.070444	1700	-36.1056	0	9	0.070444	900	-14.1181	71	1111	-4.20961	800	14
2	11823847	11824347	AT2G27750	+	400	2	11821595	11822095	AT2G27730	+	145	Yes	NA	2252	6	0.070444	600	-7.50071	1	5	0.070444	500	-5.65691	419	137	-0.574876	100	2
3	124496	124996	AT3G01330	+	136	3	122017	122517	AT3G01324	+	458	NA	Yes	2479	7	0.070444	700	-9.50897	1	1	0.070444	100	-0.456466	132	292	-7.50798	600	-2
1	29076473	29076973	AT1G77380	+	1727	1	29062468	29062968	AT1G77320	+	99	Yes	NA	14005	9	0.070444	900	-13.9947	0.217472	7	0.070444	700	-9.5533	1779	99	-0.913247	200	4
2	12680501	12681001	AT2G29660	+	110	2	12675365	12675865	AT2G29650	+	1523	NA	Yes	5136	12	0.070444	1200	-21.433	0.000189	6	0.070444	600	-7.52518	109	1796	-3.26952	600	8
1	23937501	23938001	AT1G64440	+	1125	1	23924024	23924524	AT1G64405	+	81	Yes	NA	13477	8	0.070444	800	-11.7628	1	7	0.070444	700	-9.55005	1109	101	-0.587592	100	4
3	124600	125100	AT3G01330	+	136	3	115026	115526	AT3G01326	+	853	NA	Yes	9574	8	0.070444	800	-11.6491	1	5	0.070444	500	-5.6587	132	1005	-1.44839	300	4
2	13522565	13523065	AT2G31800	+	65	2	13508973	13509473	AT2G31760	+	1254	NA	Yes	13592	7	0.070444	700	-9.64054	1	6	0.070444	600	-7.59334	65	1377	-0.576	100	2
1	25884450	25884950	AT1G68850	+	714	1	25873511	25874011	AT1G68830	+	52	Yes	NA	10939	8	0.070444	800	-11.9259	1	2	0.070444	200	-1.331	764	33	-5.75514	600	4
1	7003988	7004488	AT1G20200	+	1096	1	6981508	6982008	AT1G20132	+	1192	Yes	Yes	22480	7	0.070444	700	-9.40781	1	1	0.072982	96.5228	-0.458415	1120	1260	-7.43755	603.477	-2
3	124448	124948	AT3G01330	+	136	3	118828	119328	AT3G01329	+	542	NA	Yes	5620	8	0.070444	800	-11.6491	1	4	0.070444	400	-3.98874	132	514	-2.23072	400	4
2	16922960	16923460	AT2G40520	+	1257	2	16918076	16918576	AT2G40510	+	61	Yes	NA	4884	6	0.070444	600	-7.60462	1	1	0.070444	100	-0.452578	1351	48	-5.74729	500	2
3	6427455	6427955	AT3G18680	+	174	3	6426360	6426860	AT3G18670	+	1351	NA	Yes	1095	33	0.070444	3300	-89.0862	0	16	0.070444	1600	-32.4543	131	1238	-9.3414	1700	-34
3	166916	167416	AT3G01435	+	658	3	161508	162008	AT3G01420	+	266	NA	Yes	5408	6	0.070444	600	-7.46747	1	1	0.070444	100	-0.457211	702	199	-5.64224	500	2
1	9163993	9164493	AT1G26520	+	44	1	9157035	9157535	AT1G26480	+	596	NA	Yes	6958	8	0.070444	800	-12.0118	1	2	0.070444	200	-1.33098	37	544	-5.71232	600	4
2	13487034	13487534	AT2G31725	+	115	2	13482047	13482547	AT2G31710	+	806	NA	Yes	4987	15	0.070444	1500	-29.6705	0	8	0.070444	800	-11.6567	130	954	-3.51966	700	10
1	22692063	22692563	AT1G61500	+	197	1	22678971	22679471	AT1G61470	+	684	Yes	Yes	13092	8	0.070444	800	-11.5985	1	2	0.070444	200	-1.33089	258	567	-5.43788	600	4
2	15053661	15054161	AT2G35840	+	1846	2	15042597	15043097	AT2G35795	+	82	Yes	NA	11064	7	0.070444	700	-9.58755	1	0	0	0	0	0	0	0	700	2
1	19356555	19357055	AT1G52050	+	688	1	19346490	19346990	AT1G52030	+	74	Yes	NA	10065	6	0.070444	600	-7.57257	1	0	0.070444	0	1.00993	617	51	1.00993	600	2
1	24281080	24281580	AT1G65360	+	432	1	24276534	24277034	AT1G65350	+	1223	Yes	Yes	4546	20	0.070444	2000	-43.6905	0	12	0.070444	1200	-21.0861	315	943	-3.36713	800	16
2	9341482	9341982	AT2G21910	+	1463	2	9330898	9331398	AT2G21890	+	1139	Yes	Yes	10584	26	0.087284	2098.39	-62.49	0	9	0.078943	803.109	-13.7237	1403	1088	-9.70145	1295.28	-24
1	999918	1000418	AT1G03910	+	81	1	982893	983393	AT1G03870	+	1482	NA	Yes	17025	6	0.070444	600	-7.55971	1	1	0.070444	100	-0.455281	86	1968	-5.68523	500	2
1	24281451	24281951	AT1G65360	+	1366	1	24277535	24278035	AT1G65352	+	558	Yes	Yes	3916	26	0.070444	2600	-62.7715	0	18	0.070444	1800	-37.5824	1379	573	-2.73131	800	24
2	13891919	13892419	AT2G32760	+	88	2	13887503	13888003	AT2G32740	+	1120	NA	Yes	4416	13	0.070444	1300	-24.2777	1.3e-05	4	0.070444	400	-3.99973	92	1183	-7.34008	900	-8
1	26967077	26967577	AT1G71696	+	1893	1	26948509	26949009	AT1G71690	+	186	Yes	NA	18568	8	0.070444	800	-11.6052	1	0	0	0	0	0	0	0	800	4
1	7396030	7396530	AT1G21120	+	1207	1	7381480	7381980	AT1G21080	+	96	Yes	NA	14550	8	0.070444	800	-11.7184	1	1	0.070444	100	-0.455358	1122	88	-9.5739	700	-4
2	11455500	11456000	AT2G26865	+	57	2	11450376	11450876	AT2G26850	+	1190	NA	Yes	5124	6	0.070444	600	-7.61756	1	1	0.070444	100	-0.450296	35	1069	-5.80148	500	2
1	26967476	26967976	AT1G71696	+	674	1	26965450	26965950	AT1G71695	+	181	Yes	Yes	2026	12	0.070444	1200	-21.2216	0.000227	5	0.070444	500	-5.64257	719	197	-4.3776	700	8
1	9544515	9545015	AT1G27480	+	1804	1	9535965	9536465	AT1G27460	+	58	Yes	NA	8550	13	0.070444	1300	-24.7305	8e-06	8	0.070444	800	-11.8395	1910	64	-2.32945	500	8
1	4145378	4145878	AT1G12220	+	67	1	4132958	4133458	AT1G12190	+	1736	NA	Yes	12420	6	0.070444	600	-7.58823	1	2	0.070444	200	-1.33091	85	1660	-2.98568	400	2
3	4096044	4096544	AT3G12880	+	391	3	4095006	4095506	AT3G12870	+	374	Yes	Yes	1038	16	0.070444	1600	-31.8978	0	4	0.070444	400	-3.97867	221	291	-11.0881	1200	-12
3	2205460	2205960	AT3G06985	+	204	3	2202111	2202611	AT3G06980	+	704	NA	Yes	3349	10	0.070444	1000	-16.1917	0.026685	4	0.070444	400	-3.98302	171	662	-3.91333	600	6
1	3869536	3870036	AT1G11490	+	1220	1	3846456	3846956	AT1G11420	+	111	Yes	NA	23080	7	0.070444	700	-9.5356	1	2	0.070444	200	-1.3309	1048	117	-4.15791	500	2
1	552053	552553	AT1G02590	+	1480	1	529924	530424	AT1G02530	+	80	Yes	NA	22129	7	0.070444	700	-9.59257	1	0	0	0	0	0	0	0	700	2
2	18168541	18169041	AT2G43871	+	43	2	18161869	18162369	AT2G43850	+	1602	NA	Yes	6672	10	0.070444	1000	-16.9408	0.013938	5	0.070444	500	-5.77623	40	1824	-2.89726	500	6
2	12318420	12318920	AT2G28700	+	830	2	12303933	12304433	AT2G28680	+	53	Yes	NA	14487	9	0.070444	900	-14.2712	0.174311	4	0.070444	400	-4.01757	921	62	-3.09567	500	4
3	6079893	6080393	AT3G17760	+	88	3	6064347	6064847	AT3G17730	+	1141	NA	Yes	15546	6	0.070444	600	-7.54896	1	4	0.070444	400	-3.99973	92	1362	-0.9912	200	2
2	10101969	10102469	AT2G23740	+	47	2	10054054	10054554	AT2G23630	+	1654	NA	Yes	47915	6	0.070444	600	-7.66008	1	2	0.070444	200	-1.33094	49	1628	-3.01808	400	2
2	14794498	14794998	AT2G35100	+	65	2	14787134	14787634	AT2G35075	+	1257	NA	Yes	7364	7	0.070444	700	-9.64054	1	5	0.070444	500	-5.7057	68	1030	-0.957232	200	2
2	13836546	13837046	AT2G32610	+	1822	2	13835550	13836050	AT2G32600	+	168	Yes	NA	996	47	0.070444	4700	-144.637	0	27	0.070444	2700	-67.9278	1662	145	-9.13814	2000	-56
2	7522078	7522578	AT2G17300	+	151	2	7517104	7517604	AT2G17290	+	1330	NA	Yes	4974	15	0.070444	1500	-29.4636	0	7	0.070444	700	-9.49873	149	1486	-4.52327	800	10
2	17137490	17137990	AT2G41100	+	791	2	17127052	17127552	AT2G41060	+	130	Yes	NA	10438	6	0.070444	600	-7.50923	1	2	0.070444	200	-1.3309	644	176	-2.96381	400	2
1	147497	147997	AT1G01380	+	874	1	144541	145041	AT1G01370	+	37	Yes	NA	2956	9	0.070444	900	-14.5463	0.134004	3	0.070444	300	-2.56686	1080	27	-4.91222	600	4
3	4110426	4110926	AT3G12910	+	58	3	4094484	4094984	AT3G12870	+	992	NA	Yes	15942	6	0.070444	600	-7.61415	1	3	0.070444	300	-2.54059	63	980	-1.71172	300	2
3	317497	317997	AT3G01920	+	477	3	316533	317033	AT3G01910	+	1417	NA	Yes	964	54	0.070444	5400	-168.31	0	40	0.070444	4000	-112.758	521	1785	-3.7641	1400	66
1	21696493	21696993	AT1G58400	+	200	1	21693979	21694479	AT1G58390	+	1198	Yes	Yes	2514	31	0.070444	3100	-81.3656	0	15	0.070444	1500	-29.298	203	1128	-8.38323	1600	-32
1	26275106	26275606	AT1G69800	+	379	1	26267377	26267877	AT1G69790	+	342	Yes	Yes	7729	7	0.070444	700	-9.43901	1	1	0.070444	100	-0.457855	400	355	-7.45759	600	-2
1	2346556	2347056	AT1G07620	+	1174	1	2341533	2342033	AT1G07610	+	89	Yes	NA	5023	12	0.070444	1200	-21.5638	0.000169	8	0.070444	800	-11.7526	1234	84	-1.74908	400	8
2	19476587	19477087	AT2G47460	+	987	2	19470514	19471014	AT2G47440	+	73	Yes	NA	6073	8	0.070444	800	-11.7942	1	1	0.070444	100	-0.454883	849	77	-9.60061	700	-4
2	7346039	7346539	AT2G16940	+	45	2	7338538	7339038	AT2G16920	+	1801	NA	Yes	7501	9	0.070444	900	-14.3821	0.157144	5	0.070444	500	-5.78549	38	1682	-2.135	400	4
2	10754007	10754507	AT2G25250	+	80	2	10747590	10748090	AT2G25230	+	818	NA	Yes	6417	8	0.070444	800	-11.7664	1	3	0.070444	300	-2.53359	100	799	-3.46646	500	4
1	19020167	19020667	AT1G51310	+	129	1	19000403	19000903	AT1G51240	+	1102	NA	Yes	19764	6	0.070444	600	-7.50987	1	0	0.070444	0	1.00399	126	1133	1.00399	600	2
3	218383	218883	AT3G01550	+	899	3	201965	202465	AT3G01513	+	1376	Yes	Yes	16418	7	0.070444	700	-9.41089	1	4	0.121702	231.53	-3.96627	1390	1693	-4.5463	468.47	2
2	7180995	7181495	AT2G16570	+	774	2	7161987	7162487	AT2G16520	+	43	Yes	NA	19008	6	0.070444	600	-7.68298	1	1	0.070444	100	-0.451702	770	42	-5.76791	500	2
1	10301561	10302061	AT1G29420	+	153	1	10287528	10288028	AT1G29390	+	1538	NA	Yes	14033	9	0.070444	900	-13.8874	0.234332	5	0.070444	500	-5.6509	157	1586	-2.04045	400	4
1	26275157	26275657	AT1G69800	+	379	1	26272391	26272891	AT1G69795	+	91	Yes	NA	2766	8	0.070444	800	-11.7315	1	4	0.070444	400	-4.00274	400	85	-2.24798	400	4
1	1545055	1545555	AT1G05300	+	70	1	1530029	1530529	AT1G05260	+	1797	NA	Yes	15026	6	0.070444	600	-7.58112	1	2	0.070444	200	-1.33094	51	2006	-3.01502	400	2
1	30135527	30136027	AT1G80110	+	1422	1	30133976	30134476	AT1G80100	+	36	Yes	Yes	1551	14	0.070444	1400	-28.6891	0	5	0.070444	500	-6.06436	1395	16	-8.51158	900	-10
1	3405004	3405504	AT1G10385	+	179	1	3396442	3396942	AT1G10360	+	1501	Yes	Yes	8562	12	0.070444	1200	-21.2252	0.000226	1	0.070444	100	-0.45694	168	1524	-18.693	1100	-8
1	20961592	20962092	AT1G56040	+	656	1	20937596	20938096	AT1G55970	+	887	Yes	Yes	23996	6	0.070444	600	-7.44411	1	1	0.070444	100	-0.45814	544	919	-5.62193	500	2
1	2345033	2345533	AT1G07620	+	77	1	2343597	2344097	AT1G07615	+	620	Yes	Yes	1436	10	0.070444	1000	-16.5075	0.020788	1	0.070444	100	-0.447788	27	814	-14.9106	900	-6
1	26275211	26275711	AT1G69800	+	379	1	26273602	26274102	AT1G69797	+	94	Yes	NA	1609	14	0.070444	1400	-27.0061	1e-06	7	0.070444	700	-9.52038	400	124	-3.75965	700	10
2	11823976	11824476	AT2G27750	+	400	2	11823025	11823525	AT2G27740	+	773	Yes	Yes	951	66	0.070444	6600	-220.038	0	30	0.070444	3000	-76.6207	419	623	-19.279	3600	-86
3	4759513	4760013	AT3G14270	+	58	3	4746017	4746517	AT3G14250	+	1327	NA	Yes	13496	7	0.070444	700	-9.67187	1	3	0.070444	300	-2.57521	23	1130	-2.66423	400	2
1	27574015	27574515	AT1G73340	+	1273	1	27563141	27563641	AT1G73310	+	68	Yes	NA	10874	6	0.070444	600	-7.58578	1	1	0.070444	100	-0.454441	1119	69	-5.70427	500	2
1	29076445	29076945	AT1G77380	+	1727	1	29063553	29064053	AT1G77330	+	847	Yes	Yes	12892	7	0.07662	643.581	-9.41195	1	3	0.071302	296.389	-2.52345	1779	775	-2.48259	347.192	2
1	24973943	24974443	AT1G66940	+	1354	1	24966459	24966959	AT1G66920	+	299	Yes	Yes	7484	10	0.070444	1000	-16.1332	0.028002	4	0.070444	400	-3.9769	1797	251	-3.89144	600	6
1	20829925	20830425	AT1G55720	+	1442	1	20803061	20803561	AT1G55670	+	1213	Yes	Yes	26864	6	0.09162	461.324	-7.43684	1	1	0.104756	67.2459	-0.458467	1451	1396	-7.43572	394.078	-2
1	25884953	25885453	AT1G68850	+	421	1	25881452	25881952	AT1G68840	+	85	Yes	NA	3501	9	0.070444	900	-14.0458	0.209809	2	0.070444	200	-1.33092	417	70	-7.052	700	-4
2	14259916	14260416	AT2G33710	+	1102	2	14252549	14253049	AT2G33690	+	60	Yes	NA	7367	10	0.070444	1000	-16.6583	0.018226	8	0.070444	800	-11.8515	1277	62	-0.898376	200	6
1	3717470	3717970	AT1G11120	+	56	1	3708998	3709498	AT1G11100	+	1111	NA	Yes	8472	8	0.070444	800	-11.8927	1	2	0.070444	200	-1.33093	58	993	-5.59062	600	4
1	29301005	29301505	AT1G77930	+	1748	1	29289539	29290039	AT1G77885	+	60	Yes	NA	11466	8	0.070444	800	-11.8643	1	2	0.070444	200	-1.33094	1701	49	-5.62903	600	4
1	8658043	8658543	AT1G24430	+	995	1	8656525	8657025	AT1G24420	+	792	Yes	Yes	1518	47	0.070444	4700	-139.117	0	24	0.070444	2400	-56.1428	873	644	-10.4606	2300	-54
3	167351	167851	AT3G01435	+	347	3	165168	165668	AT3G01430	+	332	NA	Yes	2183	6	0.070444	600	-7.45963	1	2	0.070444	200	-1.33089	338	310	-2.95519	400	2
1	21884441	21884941	AT1G59580	+	98	1	21879949	21880449	AT1G59550	+	822	NA	Yes	4492	11	0.070444	1100	-18.8999	0.002124	9	0.070444	900	-13.9273	127	1049	-0.88544	200	6
2	18322433	18322933	AT2G44370	+	84	2	18305520	18306020	AT2G44290	+	1891	NA	Yes	16913	11	0.070444	1100	-18.9849	0.001977	4	0.070444	400	-3.9975	98	1920	-4.98805	700	6
2	17596931	17597431	AT2G42240	+	94	2	17583382	17583882	AT2G42190	+	1176	NA	Yes	13549	6	0.070444	600	-7.54105	1	4	0.070444	400	-3.99522	105	1598	-0.99118	200	2
1	4669062	4669562	AT1G13620	+	105	1	4662843	4663343	AT1G13609	+	399	NA	Yes	6219	6	0.070444	600	-7.52895	1	2	0.070444	200	-1.33091	102	451	-2.97855	400	2
2	11514587	11515087	AT2G26980	+	201	2	11497012	11497512	AT2G26940	+	664	NA	Yes	17575	6	0.070444	600	-7.48029	1	1	0.070444	100	-0.457451	238	705	-5.63697	500	2
1	20434421	20434921	AT1G54770	+	217	1	20422995	20423495	AT1G54720	+	761	NA	Yes	11426	12	0.070444	1200	-21.1684	0.000238	3	0.070444	300	-2.5276	205	707	-8.28338	900	-8
3	3561932	3562432	AT3G11370	+	1589	3	3559501	3560001	AT3G11350	+	118	Yes	NA	2431	23	0.070444	2300	-54.6759	0	14	0.070444	1400	-27.1313	1332	83	-4.02683	900	20
1	22690494	22690994	AT1G61500	+	92	1	22683562	22684062	AT1G61480	+	1521	Yes	Yes	6932	7	0.070444	700	-9.56582	1	1	0.070444	100	-0.451865	43	1413	-7.68298	600	-2
1	18571533	18572033	AT1G50140	+	35	1	18561993	18562493	AT1G50120	+	903	NA	Yes	9540	7	0.070444	700	-9.87097	1	3	0.070444	300	-2.56517	28	999	-2.62594	400	2
1	19356586	19357086	AT1G52050	+	688	1	19352519	19353019	AT1G52040	+	90	Yes	NA	4067	10	0.070444	1000	-16.4323	0.022106	4	0.070444	400	-3.99682	617	100	-3.96374	600	6
1	23533916	23534416	AT1G63450	+	271	1	23528498	23528998	AT1G63440	+	830	Yes	Yes	5418	10	0.070444	1000	-16.1461	0.027699	2	0.070444	200	-1.33089	235	681	-8.4396	800	-6
3	3433475	3433975	AT3G10970	+	110	3	3423972	3424472	AT3G10950	+	1275	NA	Yes	9503	18	0.070444	1800	-38.6615	0	7	0.070444	700	-9.55005	101	1448	-7.47329	1100	-14
1	12604922	12605422	AT1G34470	+	1410	1	12592479	12592979	AT1G34440	+	50	Yes	NA	12443	6	0.070444	600	-7.64545	1	2	0.070444	200	-1.33096	1622	43	-3.02912	400	2
1	30365564	30366064	AT1G80810	+	1566	1	30363178	30363678	AT1G80790	+	73	Yes	NA	2386	24	0.070444	2400	-59.701	0	12	0.070444	1200	-21.7813	1734	68	-6.91671	1200	-22
2	1153449	1153949	AT2G03780	+	84	2	1148153	1148653	AT2G03750	+	581	NA	Yes	5296	7	0.070444	700	-9.58277	1	1	0.070444	100	-0.455158	83	608	-7.55645	600	-2
1	18198432	18198932	AT1G49200	+	1748	1	18178057	18178557	AT1G49140	+	129	Yes	NA	20375	7	0.070444	700	-9.51537	1	3	0.070444	300	-2.52978	1900	148	-2.50288	400	2
1	9544582	9545082	AT1G27480	+	1804	1	9540994	9541494	AT1G27470	+	27	Yes	NA	3588	9	0.070444	900	-14.9106	0.093312	3	0.070444	300	-2.57068	1910	25	-4.95907	600	4
2	6672430	6672930	AT2G15327	+	52	2	6664900	6665400	AT2G15318	+	1473	NA	Yes	7530	12	0.070444	1200	-22.0768	0.000104	8	0.070444	800	-12.2304	32	1660	-1.87344	400	8
1	1531520	1532020	AT1G05270	+	118	1	1530000	1530500	AT1G05260	+	1797	NA	Yes	1520	39	0.070444	3900	-114.389	0	19	0.070444	1900	-41.8078	108	2006	-11.5836	2000	-44
2	12704452	12704952	AT2G29730	+	1759	2	12697996	12698496	AT2G29700	+	236	Yes	NA	6456	12	0.070444	1200	-21.147	0.000243	8	0.070444	800	-11.5633	1590	288	-1.70761	400	8
1	12657918	12658418	AT1G34575	+	1498	1	12644519	12645019	AT1G34540	+	83	Yes	NA	13399	9	0.070444	900	-14.0546	0.20849	7	0.070444	700	-9.67187	1581	58	-0.913593	200	4
2	7888560	7889060	AT2G18140	+	1518	2	7846377	7846877	AT2G18050	+	104	Yes	NA	42183	6	0.070444	600	-7.52995	1	3	0.070444	300	-2.53224	1669	113	-1.70128	300	2
3	2555466	2555966	AT3G08000	+	116	3	2552493	2552993	AT3G07990	+	964	NA	Yes	2973	21	0.070444	2100	-48.092	0	13	0.070444	1300	-24.0455	122	759	-3.38476	800	18
3	5508057	5508557	AT3G16250	+	478	3	5497579	5498079	AT3G16220	+	1571	Yes	Yes	10478	6	0.070444	600	-7.45002	1	2	0.070444	200	-1.33089	526	1873	-2.95058	400	2
1	8022875	8023375	AT1G22670	+	53	1	8015069	8015569	AT1G22650	+	1298	NA	Yes	7806	8	0.070444	800	-11.9171	1	2	0.070444	200	-1.33094	51	1427	-5.61924	600	4
2	15120895	15121395	AT2G36010	+	133	2	15107917	15108417	AT2G35960	+	1157	NA	Yes	12978	6	0.070444	600	-7.50737	1	5	0.070444	500	-5.66803	111	1379	-0.573481	100	2
1	20807973	20808473	AT1G55690	+	61	1	20804077	20804577	AT1G55675	+	713	NA	Yes	3896	6	0.070444	600	-7.60462	1	2	0.070444	200	-1.33092	67	843	-2.99735	400	2
3	3515470	3515970	AT3G11220	+	1107	3	3513030	3513530	AT3G11210	+	131	Yes	NA	2440	29	0.070444	2900	-75.3643	0	23	0.070444	2300	-54.2831	1055	143	-1.87807	600	28
2	12470058	12470558	AT2G29020	+	611	2	12456078	12456578	AT2G28990	+	408	Yes	Yes	13980	6	0.070444	600	-7.45376	1	2	0.070444	200	-1.33089	665	364	-2.95352	400	2
1	8712911	8713411	AT1G24577	+	891	1	8710025	8710525	AT1G24580	+	29	Yes	NA	2886	6	0.070444	600	-7.81763	1	3	0.070444	300	-2.58384	1023	20	-1.77106	300	2
1	9920034	9920534	AT1G28320	+	75	1	9912920	9913420	AT1G28310	+	1310	NA	Yes	7114	15	0.070444	1500	-30.153	0	9	0.070444	900	-14.1828	62	1395	-2.84107	600	10
1	17277380	17277880	AT1G47056	+	493	1	17270078	17270578	AT1G46840	+	1215	Yes	Yes	7302	13	0.070444	1300	-23.6145	2.3e-05	4	0.070444	400	-3.96928	606	1044	-7.04543	900	-8
2	11999640	12000140	AT2G28150	+	54	2	11995015	11995515	AT2G28140	+	1786	NA	Yes	4625	9	0.070444	900	-14.2598	0.176132	0	0	0	0	0	0	0	900	4
2	16501402	16501902	AT2G39550	+	1300	2	16500456	16500956	AT2G39540	+	163	Yes	Yes	946	15	0.070444	1500	-29.4157	0	8	0.070444	800	-11.6681	1421	122	-3.52986	700	10
1	29610441	29610941	AT1G78740	+	192	1	29606010	29606510	AT1G78720	+	1233	NA	Yes	4431	14	0.070444	1400	-26.5424	1e-06	10	0.070444	1000	-16.1831	214	1148	-1.59037	400	10
2	17150091	17150591	AT2G41140	+	1546	2	17138125	17138625	AT2G41100	+	874	Yes	Yes	11966	6	0.070776	597.188	-7.44016	1	1	0.075762	92.9807	-0.458341	1680	872	-7.44016	504.208	-2
1	21179015	21179515	AT1G56530	+	734	1	21170046	21170546	AT1G56510	+	305	Yes	Yes	8969	7	0.070444	700	-9.44455	1	2	0.070444	200	-1.33089	885	241	-4.12802	500	2
3	1928688	1929188	AT3G06360	+	548	3	1926958	1927458	AT3G06350	+	106	Yes	NA	1730	8	0.070444	800	-11.696	1	4	0.070444	400	-3.98932	635	129	-2.23143	400	4
2	14634000	14634500	AT2G34700	+	74	2	14628043	14628543	AT2G34680	+	549	NA	Yes	5957	6	0.070444	600	-7.57257	1	1	0.070444	100	-0.455241	85	470	-5.68614	500	2
1	5533393	5533893	AT1G16150	+	39	1	5518414	5518914	AT1G16110	+	1392	NA	Yes	14979	7	0.070444	700	-9.8181	1	3	0.070444	300	-2.57068	25	1464	-2.64676	400	2
2	19476553	19477053	AT2G47460	+	987	2	19474040	19474540	AT2G47450	+	35	Yes	NA	2513	9	0.070444	900	-14.6004	0.127025	5	0.070444	500	-5.88519	849	25	-2.21528	400	4
1	10307895	10308395	AT1G29460	+	83	1	10302546	10303046	AT1G29430	+	819	NA	Yes	5349	17	0.070444	1700	-36.0189	0	9	0.070444	900	-14.089	76	991	-4.17939	800	14
2	14510928	14511428	AT2G34370	+	1115	2	14482479	14482979	AT2G34315	+	151	Yes	NA	28449	6	0.070444	600	-7.49779	1	1	0.070444	100	-0.456782	1025	154	-5.6517	500	2
2	11005451	11005951	AT2G25800	+	37	2	11001043	11001543	AT2G25790	+	1460	NA	Yes	4408	6	0.070444	600	-7.72728	1	1	0.070444	100	-0.440172	16	1403	-6.06436	500	2
1	6418924	6419424	AT1G18650	+	61	1	6409532	6410032	AT1G18620	+	1790	NA	Yes	9392	11	0.070444	1100	-19.2157	0.001608	0	0	0	0	0	0	0	1100	6
1	5518435	5518935	AT1G16110	+	1392	1	5514521	5515021	AT1G16080	+	83	Yes	NA	3914	21	0.070444	2100	-48.8655	0	12	0.070444	1200	-21.7173	1464	73	-4.38835	900	18
1	9555984	9556484	AT1G27510	+	44	1	9544542	9545042	AT1G27480	+	1804	NA	Yes	11442	13	0.070444	1300	-25.1817	5e-06	6	0.070444	600	-7.74569	35	1910	-4.52004	700	8
2	7181477	7181977	AT2G16570	+	1817	2	7164540	7165040	AT2G16530	+	53	Yes	NA	16937	13	0.070444	1300	-24.8612	7e-06	8	0.070444	800	-11.8395	1942	64	-2.32945	500	8
1	3405499	3405999	AT1G10385	+	101	1	3397050	3397550	AT1G10370	+	1495	Yes	Yes	8449	9	0.070444	900	-13.9886	0.218454	3	0.070444	300	-2.53798	73	1825	-4.58943	600	4
1	27560470	27560970	AT1G73300	+	57	1	27555061	27555561	AT1G73280	+	1055	NA	Yes	5409	12	0.070444	1200	-21.965	0.000116	3	0.070444	300	-2.54558	50	1162	-8.79075	900	-8
1	24820592	24821092	AT1G66530	+	88	1	24809536	24810036	AT1G66490	+	1323	NA	Yes	11056	6	0.070444	600	-7.54896	1	4	0.070444	400	-4.00522	80	1301	-0.991229	200	2
1	13321490	13321990	AT1G35830	+	699	1	13315520	13316020	AT1G35820	+	40	Yes	NA	5970	6	0.070444	600	-7.70335	1	2	0.070444	200	-1.33093	829	54	-3.01086	400	2
1	29301593	29302093	AT1G77930	+	1447	1	29295031	29295531	AT1G77890	+	87	Yes	NA	6562	9	0.070444	900	-14.0374	0.211008	1	0.070444	100	-0.455358	1683	88	-11.7401	800	-4
3	4756449	4756949	AT3G14270	+	45	3	4748551	4749051	AT3G14260	+	882	NA	Yes	7898	6	0.070444	600	-7.67099	1	1	0.070444	100	-0.450296	35	901	-5.80148	500	2
1	27574037	27574537	AT1G73340	+	1273	1	27565514	27566014	AT1G73320	+	80	Yes	NA	8523	9	0.070444	900	-14.0686	0.206301	2	0.070444	200	-1.33091	1119	95	-6.98717	700	-4
1	11250030	11250530	AT1G31420	+	1290	1	11245576	11246076	AT1G31400	+	152	Yes	NA	4454	11	0.070444	1100	-18.723	0.002456	5	0.070444	500	-5.65657	1658	138	-3.53384	600	6
2	7181022	7181522	AT2G16570	+	774	2	7166000	7166500	AT2G16535	+	53	Yes	NA	15022	9	0.070444	900	-14.2712	0.174311	2	0.070444	200	-1.33092	770	61	-7.08922	700	-4
1	13039929	13040429	AT1G35460	+	42	1	13026971	13027471	AT1G35420	+	1390	NA	Yes	12958	7	0.070444	700	-9.78556	1	3	0.070444	300	-2.55516	36	1706	-2.58932	400	2
1	20830172	20830672	AT1G55720	+	1442	1	20807406	20807906	AT1G55680	+	111	Yes	NA	22766	7	0.070444	700	-9.5356	1	1	0.070444	100	-0.456782	1451	154	-7.49641	600	-2
1	28244967	28245467	AT1G75250	+	780	1	28242412	28242912	AT1G75240	+	256	Yes	Yes	2555	12	0.070444	1200	-21.128	0.000247	4	0.070444	400	-3.97462	814	304	-5.93907	800	8
1	2394620	2395120	AT1G07725	+	43	1	2392401	2392901	AT1G07720	+	736	NA	Yes	2219	10	0.070444	1000	-16.9408	0.013938	4	0.070444	400	-4.06117	35	942	-4.22135	600	6
1	27573946	27574446	AT1G73340	+	1273	1	27568007	27568507	AT1G73325	+	55	Yes	NA	5939	11	0.070444	1100	-19.3104	0.00147	4	0.070444	400	-4.02955	1119	51	-5.17068	700	6
1	497005	497505	AT1G02440	+	69	1	486950	487450	AT1G02400	+	1418	NA	Yes	10055	7	0.070444	700	-9.62562	1	6	0.070444	600	-7.55645	83	1749	-0.579153	100	2
1	1425459	1425959	AT1G05000	+	1129	1	1421015	1421515	AT1G04990	+	55	Yes	NA	4444	7	0.070444	700	-9.68786	1	3	0.070444	300	-2.5442	1364	53	-2.55094	400	2
2	15063477	15063977	AT2G35880	+	106	2	15053645	15054145	AT2G35840	+	1846	NA	Yes	9832	6	0.070444	600	-7.52798	1	0	0	0	0	0	0	0	600	2
2	16776491	16776991	AT2G40150	+	81	2	16766550	16767050	AT2G40130	+	695	NA	Yes	9941	8	0.070444	800	-11.7628	1	3	0.070444	300	-2.53821	72	709	-3.49548	500	4
2	15839026	15839526	AT2G37790	+	86	2	15832065	15832565	AT2G37760	+	650	NA	Yes	6961	6	0.070444	600	-7.55185	1	0	0.070444	0	1.00754	67	496	1.00754	600	2
2	9576586	9577086	AT2G22530	+	1907	2	9555487	9555987	AT2G22490	+	70	Yes	NA	21099	12	0.070444	1200	-21.7545	0.000142	0	0	0	0	0	0	0	1200	8
2	19083447	19083947	AT2G46494	+	626	2	19074582	19075082	AT2G46470	+	59	Yes	NA	8865	6	0.070444	600	-7.61086	1	0	0.070444	0	1.00857	475	59	1.00857	600	2
2	14146316	14146816	AT2G33380	+	1222	2	14130928	14131428	AT2G33340	+	68	Yes	NA	15388	6	0.070444	600	-7.58578	1	5	0.070444	500	-5.70717	1299	67	-0.568563	100	2
2	10801495	10801995	AT2G25355	+	1745	2	10795556	10796056	AT2G25344	+	47	Yes	NA	5939	8	0.070444	800	-11.9759	1	5	0.070444	500	-5.76038	1852	44	-1.476	300	4
1	22689422	22689922	AT1G61500	+	1681	1	22685393	22685893	AT1G61490	+	140	Yes	Yes	4029	16	0.070444	1600	-32.3977	0	6	0.070444	600	-7.54756	1987	89	-7.04609	1000	-12
2	9576602	9577102	AT2G22530	+	1907	2	9560024	9560524	AT2G22496	+	65	Yes	NA	16578	12	0.070444	1200	-21.8247	0.000133	0	0	0	0	0	0	0	1200	8
1	10010079	10010579	AT1G28470	+	102	1	10006315	10006815	AT1G28460	+	538	NA	Yes	3764	11	0.070444	1100	-18.8801	0.002159	7	0.070444	700	-9.54104	107	523	-1.81687	400	6
1	5839421	5839921	AT1G17070	+	57	1	5834933	5835433	AT1G17060	+	688	NA	Yes	4488	10	0.070444	1000	-16.695	0.017624	5	0.070444	500	-5.72482	57	755	-2.82734	500	6
2	11229018	11229518	AT2G26390	+	40	2	11225564	11226064	AT2G26370	+	540	NA	Yes	3454	6	0.070444	600	-7.70335	1	5	0.070444	500	-5.75353	46	708	-0.562709	100	2
1	19463508	19464008	AT1G52270	+	65	1	19454951	19455451	AT1G52230	+	1052	NA	Yes	8557	6	0.070444	600	-7.59334	1	1	0.070444	100	-0.452703	49	1311	-5.74437	500	2
2	17367530	17368030	AT2G41660	+	1155	2	17363976	17364476	AT2G41650	+	238	Yes	Yes	3554	22	0.070444	2200	-50.3415	0	14	0.070444	1400	-26.4442	1352	249	-3.14566	800	18
2	12760480	12760980	AT2G29940	+	1716	2	12716506	12717006	AT2G29770	+	244	Yes	NA	43974	6	0.070444	600	-7.47104	1	1	0.070444	100	-0.457196	1431	197	-5.64257	500	2
1	23390111	23390611	AT1G63080	+	865	1	23378012	23378512	AT1G63050	+	231	Yes	Yes	12099	7	0.070444	700	-9.46101	1	4	0.070444	400	-3.97625	1039	264	-1.54333	300	2
1	7411514	7412014	AT1G21160	+	48	1	7400011	7400511	AT1G21130	+	1468	NA	Yes	11503	8	0.070444	800	-11.965	1	1	0.070444	100	-0.450962	38	1667	-9.83019	700	-4
1	153461	153961	AT1G01410	+	70	1	149490	149990	AT1G01390	+	1207	NA	Yes	3971	19	0.070444	1900	-42.7281	0	9	0.070444	900	-14.2283	57	1517	-6.09685	1000	16
1	17594511	17595011	AT1G47780	+	1044	1	17590989	17591489	AT1G47770	+	699	Yes	Yes	3522	19	0.070444	1900	-40.5104	0	13	0.070444	1300	-23.5923	1092	588	-2.23422	600	14
2	1151993	1152493	AT2G03780	+	72	2	1149879	1150379	AT2G03760	+	798	NA	Yes	2114	12	0.070444	1200	-21.7294	0.000145	8	0.070444	800	-11.8927	56	854	-1.78239	400	8
1	23390082	23390582	AT1G63080	+	865	1	23382529	23383029	AT1G63057	+	127	Yes	Yes	7553	7	0.070444	700	-9.51732	1	1	0.070444	100	-0.456795	1039	155	-7.49597	600	-2
1	8993969	8994469	AT1G25570	+	36	1	8982080	8982580	AT1G25560	+	989	NA	Yes	11889	11	0.070444	1100	-19.8483	0.000867	2	0.070444	200	-1.33101	32	970	-11.023	900	-6
1	4164445	4164945	AT1G12260	+	697	1	4157990	4158490	AT1G12244	+	141	Yes	NA	6455	6	0.070444	600	-7.5028	1	5	0.070444	500	-5.66188	608	124	-0.574253	100	2
1	19417367	19417867	AT1G52155	+	1408	1	19413486	19413986	AT1G52150	+	82	Yes	NA	3881	13	0.070444	1300	-24.34	1.2e-05	6	0.070444	600	-7.54756	1428	89	-4.11375	700	8
2	15166604	15167104	AT2G36130	+	259	2	15159942	15160442	AT2G36100	+	1370	NA	Yes	6662	10	0.070444	1000	-16.1525	0.027553	4	0.070444	400	-3.97319	351	1184	-3.87832	600	6
2	12704373	12704873	AT2G29730	+	1759	2	12698503	12699003	AT2G29710	+	116	Yes	NA	5870	8	0.070444	800	-11.6776	1	2	0.070444	200	-1.33093	1590	60	-5.58375	600	4
1	12657555	12658055	AT1G34575	+	719	1	12652529	12653029	AT1G34550	+	49	Yes	NA	5026	7	0.070444	700	-9.72611	1	2	0.070444	200	-1.33104	802	29	-4.35268	500	2
3	6455959	6456459	AT3G18750	+	92	3	6452482	6452982	AT3G18730	+	1124	NA	Yes	3477	13	0.070444	1300	-24.2409	1.3e-05	6	0.070444	600	-7.54756	89	912	-4.11375	700	8
1	25611007	25611507	AT1G68330	+	1085	1	25601044	25601544	AT1G68310	+	44	Yes	NA	9963	6	0.070444	600	-7.67684	1	2	0.070444	200	-1.33095	1093	46	-3.02322	400	2
1	551976	552476	AT1G02590	+	1480	1	536596	537096	AT1G02550	+	75	Yes	NA	15380	7	0.070444	700	-9.60634	1	0	0	0	0	0	0	0	700	2
2	10348694	10349194	AT2G24330	+	656	2	10342064	10342564	AT2G24300	+	84	Yes	NA	6630	6	0.070444	600	-7.55488	1	2	0.070444	200	-1.33091	748	81	-2.98781	400	2
2	8868596	8869096	AT2G20590	+	59	2	8855440	8855940	AT2G20570	+	745	NA	Yes	13156	6	0.070444	600	-7.61086	1	2	0.070444	200	-1.33094	50	793	-3.01652	400	2
2	15847620	15848120	AT2G37820	+	75	2	15834854	15835354	AT2G37770	+	1290	NA	Yes	12766	6	0.070444	600	-7.57058	1	3	0.070444	300	-2.54154	60	1479	-1.71294	300	2
1	17603482	17603982	AT1G47810	+	1241	1	17590873	17591373	AT1G47770	+	699	Yes	Yes	12609	6	0.070444	600	-7.44313	1	4	0.070444	400	-3.96945	1289	588	-0.991116	200	2
2	9172494	9172994	AT2G21430	+	89	2	9158484	9158984	AT2G21400	+	1173	NA	Yes	14010	13	0.070444	1300	-24.2682	1.3e-05	5	0.070444	500	-5.69654	75	1311	-5.54468	800	8
2	13928617	13929117	AT2G32830	+	1623	2	13916509	13917009	AT2G32800	+	1156	Yes	Yes	12108	22	0.098274	1576.98	-49.6101	0	9	0.112323	564.444	-13.7201	1721	1262	-10.5039	1012.54	-18
2	17150046	17150546	AT2G41140	+	1546	2	17140579	17141079	AT2G41110	+	232	Yes	NA	9467	7	0.070444	700	-9.46072	1	5	0.070444	500	-5.64605	1680	178	-0.957041	200	2
1	6059038	6059538	AT1G17615	+	109	1	6052827	6053327	AT1G17600	+	401	NA	Yes	6211	6	0.070444	600	-7.52518	1	2	0.070444	200	-1.3309	103	321	-2.97821	400	2
2	14756635	14757135	AT2G35020	+	153	2	14750830	14751330	AT2G34990	+	599	NA	Yes	5805	8	0.070444	800	-11.6309	1	3	0.070444	300	-2.53024	140	473	-3.44572	500	4
1	21179008	21179508	AT1G56530	+	734	1	21176055	21176555	AT1G56520	+	154	Yes	Yes	2953	11	0.070444	1100	-18.7189	0.002465	2	0.070444	200	-1.3309	885	132	-10.2015	900	-6
1	28603418	28603918	AT1G76240	+	114	1	28599520	28600020	AT1G76230	+	580	NA	Yes	3898	6	0.070444	600	-7.52083	1	2	0.070444	200	-1.3309	107	561	-2.97689	400	2
2	14510901	14511401	AT2G34370	+	1115	2	14485051	14485551	AT2G34320	+	1194	Yes	Yes	25850	7	0.070444	700	-9.40757	1	4	0.070444	400	-3.9671	1025	1235	-1.53915	300	2
1	20168015	20168515	AT1G54030	+	92	1	20162560	20163060	AT1G54020	+	884	NA	Yes	5455	12	0.070444	1200	-21.5412	0.000172	6	0.070444	600	-7.51393	123	800	-3.25573	600	8
2	17137515	17138015	AT2G41100	+	791	2	17132932	17133432	AT2G41080	+	108	Yes	NA	4583	7	0.070444	700	-9.53964	1	2	0.070444	200	-1.3309	644	112	-4.16054	500	2
1	4108011	4108511	AT1G12110	+	96	1	4095145	4095645	AT1G12100	+	1140	Yes	Yes	12866	6	0.070444	600	-7.53864	1	2	0.070444	200	-1.33091	98	1240	-2.98	400	2
3	4108965	4109465	AT3G12910	+	74	3	4099474	4099974	AT3G12890	+	762	NA	Yes	9491	6	0.070444	600	-7.57257	1	2	0.070444	200	-1.33094	52	793	-3.01357	400	2
2	18775079	18775579	AT2G45550	+	466	2	18772062	18772562	AT2G45540	+	112	Yes	NA	3017	6	0.070444	600	-7.52252	1	4	0.070444	400	-3.99324	348	112	-0.991172	200	2
2	6245470	6245970	AT2G14620	+	63	2	6225593	6226093	AT2G14580	+	1285	NA	Yes	19877	7	0.070444	700	-9.64875	1	2	0.070444	200	-1.33094	49	1210	-4.24284	500	2
1	19281040	19281540	AT1G51900	+	160	1	19250463	19250963	AT1G51840	+	1569	Yes	Yes	30577	8	0.070444	800	-11.6245	1	1	0.070444	100	-0.456981	172	1758	-9.48446	700	-4
2	14419437	14419937	AT2G34150	+	73	2	14414569	14415069	AT2G34140	+	927	NA	Yes	4868	10	0.070444	1000	-16.5363	0.020297	3	0.070444	300	-2.53972	66	925	-5.83262	700	6
2	13677034	13677534	AT2G32200	+	77	2	13674626	13675126	AT2G32190	+	1393	NA	Yes	2408	21	0.070444	2100	-49.086	0	10	0.070444	1000	-16.6151	64	1333	-6.61803	1100	18
3	218101	218601	AT3G01550	+	1604	3	211440	211940	AT3G01530	+	54	Yes	NA	6661	12	0.070444	1200	-22.0294	0.000109	4	0.070444	400	-4.07841	1937	30	-6.79905	800	8
1	11315560	11316060	AT1G31600	+	62	1	11297108	11297608	AT1G31550	+	1452	NA	Yes	18452	6	0.070444	600	-7.60166	1	2	0.070444	200	-1.33095	46	1669	-3.02322	400	2
1	23146038	23146538	AT1G62530	+	117	1	23136921	23137421	AT1G62510	+	984	Yes	Yes	9117	11	0.070444	1100	-18.8184	0.002271	2	0.070444	200	-1.33091	102	1300	-10.2708	900	-6
1	5518480	5518980	AT1G16110	+	1392	1	5516431	5516931	AT1G16090	+	29	Yes	NA	2049	12	0.070444	1200	-23.1918	3.4e-05	4	0.070444	400	-4.15166	1464	19	-7.61	800	-8
1	19020519	19021019	AT1G51310	+	186	1	19004911	19005411	AT1G51260	+	1405	NA	Yes	15608	6	0.070444	600	-7.48454	1	3	0.070444	300	-2.52754	207	1088	-1.69553	300	2
1	3404052	3404552	AT1G10385	+	814	1	3401530	3402030	AT1G10380	+	391	Yes	Yes	2522	15	0.070444	1500	-29.0722	0	4	0.070444	400	-3.97237	857	385	-9.60362	1100	-10
2	16701086	16701586	AT2G40000	+	119	2	16699006	16699506	AT2G39990	+	746	NA	Yes	2080	15	0.070444	1500	-29.641	0	6	0.070444	600	-7.52609	108	645	-5.92053	900	10
2	8010868	8011368	AT2G18480	+	972	2	8001447	8001947	AT2G18460	+	81	Yes	NA	9421	6	0.070444	600	-7.55971	1	4	0.070444	400	-4.00804	1180	75	-0.991246	200	2
1	12319570	12320070	AT1G33920	+	592	1	12315488	12315988	AT1G33910	+	695	Yes	Yes	4082	20	0.070444	2000	-43.5801	0	6	0.070444	600	-7.44545	647	605	-11.083	1400	-16
1	3158359	3158859	AT1G09750	+	524	1	3156032	3156532	AT1G09740	+	69	Yes	NA	2327	8	0.070444	800	-11.8128	1	2	0.070444	200	-1.33093	603	53	-5.61024	600	4
1	27573079	27573579	AT1G73340	+	889	1	27568632	27569132	AT1G73330	+	49	Yes	NA	4447	9	0.070444	900	-14.3218	0.166357	2	0.070444	200	-1.33095	925	47	-7.17797	700	-4
2	13408040	13408540	AT2G31470	+	1087	2	13393425	13393925	AT2G31420	+	89	Yes	NA	14615	6	0.070444	600	-7.54756	1	5	0.070444	500	-5.68349	1190	88	-0.571542	100	2
1	29076222	29076722	AT1G77380	+	520	1	29070130	29070630	AT1G77350	+	94	Yes	NA	6092	6	0.070444	600	-7.54105	1	2	0.070444	200	-1.33091	547	87	-2.98469	400	2
1	11249592	11250092	AT1G31420	+	801	1	11247415	11247915	AT1G31410	+	102	Yes	NA	2177	9	0.070444	900	-13.9857	0.218896	2	0.070444	200	-1.33091	784	96	-6.9853	700	-4
1	24836940	24837440	AT1G66570	+	72	1	24824534	24825034	AT1G66540	+	1647	NA	Yes	12406	7	0.070444	700	-9.61557	1	3	0.070444	300	-2.53869	70	1736	-2.53223	400	2
1	20962502	20963002	AT1G56045	+	71	1	20961546	20962046	AT1G56040	+	656	NA	Yes	956	21	0.070444	2100	-49.3488	0	7	0.070444	700	-9.62918	68	544	-11.4428	1400	-18
1	22959984	22960484	AT1G62120	+	69	1	22949977	22950477	AT1G62085	+	1519	NA	Yes	10007	9	0.070444	900	-14.1309	0.196613	5	0.070444	500	-5.69654	75	1620	-2.07093	400	4
1	9245950	9246450	AT1G26740	+	48	1	9224935	9225435	AT1G26690	+	1619	NA	Yes	21015	7	0.070444	700	-9.73347	1	3	0.070444	300	-2.54956	43	2031	-2.5695	400	2
3	2867054	2867554	AT3G09330	+	114	3	2858450	2858950	AT3G09300	+	1560	NA	Yes	8604	10	0.070444	1000	-16.3403	0.023746	6	0.070444	600	-7.52252	112	1540	-1.91726	400	6
1	6839387	6839887	AT1G19790	+	1139	1	6826976	6827476	AT1G19750	+	46	Yes	NA	12411	6	0.070444	600	-7.66541	1	3	0.070444	300	-2.55171	1432	40	-1.72612	300	2
2	14145530	14146030	AT2G33380	+	864	2	14136933	14137433	AT2G33350	+	66	Yes	NA	8597	8	0.070444	800	-11.8283	1	2	0.070444	200	-1.33094	969	52	-5.61465	600	4
2	14860963	14861463	AT2G35290	+	73	2	14857127	14857627	AT2G35270	+	1215	NA	Yes	3836	14	0.070444	1400	-27.2805	1e-06	8	0.070444	800	-11.7462	86	1211	-2.90861	600	10
1	19463589	19464089	AT1G52270	+	65	1	19457126	19457626	AT1G52240	+	1119	NA	Yes	6463	7	0.070444	700	-9.64054	1	4	0.070444	400	-4.03233	49	1010	-1.57032	300	2
2	16297541	16298041	AT2G39030	+	41	2	16292287	16292787	AT2G39010	+	402	NA	Yes	5254	6	0.070444	600	-7.69621	1	1	0.070444	100	-0.451161	39	385	-5.78073	500	2
2	14720605	14721105	AT2G34890	+	957	2	14710964	14711464	AT2G34870	+	69	Yes	NA	9641	6	0.070444	600	-7.58342	1	3	0.070444	300	-2.53755	946	75	-1.70789	300	2
2	15166910	15167410	AT2G36130	+	135	2	15162083	15162583	AT2G36110	+	1188	NA	Yes	4827	13	0.070444	1300	-23.9888	1.6e-05	7	0.070444	700	-9.49731	151	1018	-3.01377	600	8
2	13612114	13612614	AT2G31990	+	436	2	13608075	13608575	AT2G31970	+	74	Yes	NA	4039	8	0.070444	800	-11.7899	1	1	0.070444	100	-0.454781	347	75	-9.60634	700	-4
1	12657582	12658082	AT1G34575	+	719	1	12653977	12654477	AT1G34560	+	73	Yes	NA	3605	9	0.070444	900	-14.106	0.200521	6	0.070444	600	-7.59879	802	63	-1.39094	300	4
1	23994567	23995067	AT1G64590	+	378	1	23987046	23987546	AT1G64583	+	80	Yes	NA	7521	6	0.070444	600	-7.56141	1	1	0.070444	100	-0.455432	304	90	-5.68182	500	2
2	7888036	7888536	AT2G18140	+	886	2	7853412	7853912	AT2G18070	+	315	Yes	Yes	34624	7	0.070444	700	-9.44292	1	1	0.070444	100	-0.457814	846	338	-7.45907	600	-2
1	23993928	23994428	AT1G64590	+	552	1	23989957	23990457	AT1G64585	+	119	Yes	NA	3971	13	0.070444	1300	-24.0604	1.5e-05	5	0.070444	500	-5.68801	360	83	-5.50963	800	8
1	3869929	3870429	AT1G11490	+	1216	1	3853397	3853897	AT1G11450	+	87	Yes	NA	16532	8	0.070444	800	-11.7431	1	2	0.070444	200	-1.33092	1438	63	-5.5743	600	4
1	25611067	25611567	AT1G68330	+	1085	1	25603515	25604015	AT1G68320	+	40	Yes	NA	7552	6	0.070444	600	-7.70335	1	1	0.070444	100	-0.449205	1093	31	-5.82799	500	2
3	5507495	5507995	AT3G16250	+	134	3	5505537	5506037	AT3G16240	+	1145	Yes	Yes	1958	13	0.070444	1300	-23.9928	1.6e-05	7	0.070444	700	-9.5343	112	1251	-3.04486	600	8
1	552080	552580	AT1G02590	+	1480	1	538508	539008	AT1G02560	+	95	Yes	NA	13572	10	0.070444	1000	-16.4092	0.022506	0	0	0	0	0	0	0	1000	6
2	8868605	8869105	AT2G20590	+	59	2	8859557	8860057	AT2G20580	+	758	NA	Yes	9048	8	0.070444	800	-11.871	1	3	0.070444	300	-2.54558	50	842	-3.54308	500	4
2	10348655	10349155	AT2G24330	+	656	2	10344417	10344917	AT2G24310	+	54	Yes	NA	4238	8	0.070444	800	-11.9087	1	1	0.070444	100	-0.446411	748	24	-10.1201	700	-4
2	10404497	10404997	AT2G24510	+	122	2	10394974	10395474	AT2G24460	+	1088	NA	Yes	9523	6	0.070444	600	-7.51464	1	4	0.070444	400	-3.9908	122	670	-0.991163	200	2
1	21461970	21462470	AT1G58025	+	37	1	21446977	21447477	AT1G58007	+	1052	NA	Yes	14993	7	0.070444	700	-9.84298	1	3	0.070444	300	-2.54956	43	1066	-2.5695	400	2
2	15847445	15847945	AT2G37820	+	75	2	15837992	15838492	AT2G37780	+	1663	NA	Yes	9453	8	0.070444	800	-11.7857	1	7	0.070444	700	-9.66213	60	1792	-0.580527	100	4
2	18957426	18957926	AT2G46130	+	958	2	18952618	18953118	AT2G46090	+	53	Yes	NA	4808	8	0.070444	800	-11.9171	1	1	0.070444	100	-0.450296	1116	35	-9.87097	700	-4
2	19088520	19089020	AT2G46500	+	148	2	19084900	19085400	AT2G46495	+	827	NA	Yes	3620	14	0.070444	1400	-26.6718	1e-06	3	0.070444	300	-2.52881	169	669	-11.3171	1100	-10
3	2091052	2091552	AT3G66656	+	97	3	2077517	2078017	AT3G06640	+	1703	NA	Yes	13535	7	0.070444	700	-9.55668	1	3	0.070444	300	-2.53462	92	1864	-2.51871	400	2
1	28005460	28005960	AT1G74510	+	93	1	27988932	27989432	AT1G74460	+	1305	NA	Yes	16528	7	0.070444	700	-9.56391	1	2	0.070444	200	-1.33091	98	1528	-4.16939	500	2
1	9162500	9163000	AT1G26515	+	85	1	9158601	9159101	AT1G26500	+	632	NA	Yes	3899	19	0.070444	1900	-42.257	0	12	0.070444	1200	-21.5797	87	579	-3.01174	700	16
2	17150133	17150633	AT2G41140	+	1546	2	17141960	17142460	AT2G41120	+	150	Yes	NA	8173	8	0.070444	800	-11.6338	1	5	0.070444	500	-5.66455	1680	118	-1.4499	300	4
1	21871484	21871984	AT1G59535	+	89	1	21868448	21868948	AT1G59530	+	416	Yes	Yes	3036	8	0.070444	800	-11.7372	1	4	0.070444	400	-3.99934	93	382	-2.24375	400	4
2	18086029	18086529	AT2G43600	+	133	2	18080940	18081440	AT2G43590	+	712	NA	Yes	5089	8	0.070444	800	-11.6528	1	4	0.070444	400	-3.9873	140	574	-2.22897	400	4
1	5820910	5821410	AT1G17020	+	83	1	5807099	5807599	AT1G16980	+	1338	NA	Yes	13811	7	0.070444	700	-9.58513	1	3	0.070444	300	-2.53568	85	1318	-2.52222	400	2
1	29484086	29484586	AT1G78370	+	863	1	29472972	29473472	AT1G78340	+	84	Yes	NA	11114	9	0.070444	900	-14.0501	0.209177	3	0.070444	300	-2.54029	1043	64	-4.61336	600	4
3	331043	331543	AT3G01990	+	47	3	313454	313954	AT3G01900	+	1746	NA	Yes	17589	7	0.070444	700	-9.74117	1	3	0.070444	300	-2.54059	63	1752	-2.53864	400	2
2	18714468	18714968	AT2G45412	+	105	2	18705377	18705877	AT2G45400	+	651	Yes	Yes	9091	8	0.070444	800	-11.6981	1	1	0.070444	100	-0.455698	98	716	-9.55497	700	-4
1	6489437	6489937	AT1G18830	+	69	1	6476534	6477034	AT1G18780	+	1219	NA	Yes	12903	8	0.070444	800	-11.8128	1	3	0.070444	300	-2.54059	63	1291	-3.51066	500	4
1	4865019	4865519	AT1G14240	+	1055	1	4857024	4857524	AT1G14210	+	102	Yes	NA	7995	7	0.070444	700	-9.54847	1	2	0.070444	200	-1.3309	859	129	-4.15245	500	2
1	9439482	9439982	AT1G27180	+	867	1	9426033	9426533	AT1G27130	+	1322	Yes	Yes	13449	8	0.070444	800	-11.513	1	2	0.070444	200	-1.33089	712	1405	-5.41117	600	4
2	17117971	17118471	AT2G41020	+	88	2	17106453	17106953	AT2G40990	+	1390	NA	Yes	11518	6	0.070444	600	-7.54896	1	2	0.070444	200	-1.33091	84	1369	-2.98619	400	2
1	23147023	23147523	AT1G62530	+	313	1	23145008	23145508	AT1G62520	+	37	Yes	NA	2015	6	0.070444	600	-7.72728	1	1	0.070444	100	-0.440172	429	16	-6.06436	500	2
2	16634518	16635018	AT2G39851	+	68	2	16631422	16631922	AT2G39850	+	593	NA	Yes	3096	7	0.070444	700	-9.62918	1	4	0.070444	400	-4.0674	33	687	-1.58853	300	2
1	19020533	19021033	AT1G51310	+	186	1	19007676	19008176	AT1G51270	+	1515	NA	Yes	12857	6	0.070444	600	-7.48454	1	3	0.070444	300	-2.52754	207	1334	-1.69553	300	2
2	16858540	16859040	AT2G40370	+	131	2	16840832	16841332	AT2G40320	+	1317	NA	Yes	17708	6	0.070444	600	-7.5086	1	5	0.070444	500	-5.66857	110	1509	-0.573414	100	2
1	24007505	24008005	AT1G64620	+	1284	1	23993671	23994171	AT1G64590	+	1497	Yes	Yes	13834	6	0.100682	419.803	-7.43637	1	2	0.093922	150.006	-1.33089	1300	1397	-2.94667	269.797	2
2	8010579	8011079	AT2G18480	+	341	2	8007585	8008085	AT2G18470	+	96	Yes	NA	2994	8	0.070444	800	-11.7184	1	3	0.070444	300	-2.53568	374	85	-3.47951	500	4
1	4854818	4855318	AT1G14200	+	79	1	4850945	4851445	AT1G14185	+	1127	NA	Yes	3873	9	0.070444	900	-14.0735	0.205551	1	0.070444	100	-0.454618	72	787	-11.7987	800	-4
2	5922964	5923464	AT2G14070	+	36	2	5909530	5910030	AT2G14050	+	1546	NA	Yes	13434	6	0.070444	600	-7.73621	1	3	0.070444	300	-2.57068	25	1641	-1.75203	300	2
1	21359426	21359926	AT1G57670	+	622	1	21352957	21353457	AT1G57650	+	55	Yes	NA	6469	8	0.070444	800	-11.9006	1	7	0.070444	700	-9.74117	778	47	-0.575492	100	4
2	17117525	17118025	AT2G41020	+	155	2	17109140	17109640	AT2G40995	+	663	NA	Yes	8385	7	0.070444	700	-9.49459	1	3	0.070444	300	-2.52814	187	656	-2.49757	400	2
2	11713581	11714081	AT2G27380	+	62	2	11709517	11710017	AT2G27370	+	1203	NA	Yes	4064	7	0.070444	700	-9.65306	1	1	0.070444	100	-0.44818	28	1320	-7.83292	600	-2
2	13408410	13408910	AT2G31470	+	1079	2	13397533	13398033	AT2G31432	+	103	Yes	NA	10877	6	0.070444	600	-7.53096	1	3	0.070444	300	-2.53396	1041	97	-1.7034	300	2
1	486921	487421	AT1G02400	+	1418	1	476517	477017	AT1G02380	+	128	Yes	Yes	10404	6	0.070444	600	-7.51052	1	2	0.070444	200	-1.33091	1749	101	-2.9789	400	2
2	1238870	1239370	AT2G03955	+	1267	2	1192605	1193105	AT2G03913	+	47	Yes	NA	46265	6	0.070444	600	-7.66008	1	1	0.070444	100	-0.453156	1289	53	-5.73382	500	2
2	15838921	15839421	AT2G37790	+	86	2	15838002	15838502	AT2G37780	+	1663	NA	Yes	919	25	0.070444	2500	-62.5659	0	13	0.070444	1300	-24.5485	67	1792	-6.70123	1200	24
2	19082969	19083469	AT2G46494	+	562	2	19078996	19079496	AT2G46490	+	316	Yes	Yes	3973	13	0.070444	1300	-23.6919	2.1e-05	9	0.070444	900	-13.7826	606	337	-1.63811	400	8
2	14146335	14146835	AT2G33380	+	1222	2	14139978	14140478	AT2G33360	+	73	Yes	NA	6357	8	0.070444	800	-11.7942	1	1	0.070444	100	-0.454036	1299	63	-9.64875	700	-4
1	22791575	22792075	AT1G61720	+	964	1	22783043	22783543	AT1G61690	+	70	Yes	NA	8532	7	0.070444	700	-9.62217	1	4	0.070444	400	-4.0037	1033	83	-1.55623	300	2
1	9179014	9179514	AT1G26560	+	195	1	9177378	9177878	AT1G26558	+	65	Yes	NA	1636	7	0.070444	700	-9.64054	1	3	0.070444	300	-2.53844	285	71	-2.53142	400	2
1	27993019	27993519	AT1G74480	+	196	1	27989062	27989562	AT1G74460	+	1305	NA	Yes	3957	17	0.070444	1700	-35.0827	0	10	0.070444	1000	-16.1596	247	1528	-3.09673	700	12
2	11515501	11516001	AT2G26980	+	119	2	11512968	11513468	AT2G26975	+	1296	NA	Yes	2533	26	0.070444	2600	-64.9671	0	11	0.070444	1100	-18.9995	82	1684	-9.9538	1500	-24
2	19180998	19181498	AT2G46690	+	987	2	19175966	19176466	AT2G46685	+	65	Yes	NA	5032	11	0.070444	1100	-19.1629	0.001688	8	0.070444	800	-11.8283	1092	66	-1.29126	300	6
2	14720149	14720649	AT2G34890	+	578	2	14716093	14716593	AT2G34880	+	70	Yes	NA	4056	9	0.070444	900	-14.1244	0.197602	2	0.070444	200	-1.33093	478	55	-7.12131	700	-4
1	18217522	18218022	AT1G49240	+	132	1	18198413	18198913	AT1G49200	+	1748	NA	Yes	19109	6	0.070444	600	-7.50798	1	2	0.070444	200	-1.3309	161	1900	-2.96568	400	2
1	19265510	19266010	AT1G51870	+	71	1	19256548	19257048	AT1G51850	+	1297	NA	Yes	8962	6	0.070444	600	-7.57889	1	1	0.070444	100	-0.451702	42	1313	-5.76791	500	2
1	1622889	1623389	AT1G05490	+	452	1	1618034	1618534	AT1G05470	+	86	Yes	NA	4855	10	0.070444	1000	-16.4529	0.021738	6	0.070444	600	-7.53411	476	100	-1.92219	400	6
2	11724995	11725495	AT2G27410	+	94	2	11709935	11710435	AT2G27370	+	1245	NA	Yes	15060	6	0.070444	600	-7.54105	1	3	0.070444	300	-2.53224	113	1544	-1.70128	300	2
1	18198952	18199452	AT1G49200	+	994	1	18184028	18184528	AT1G49170	+	142	Yes	NA	14924	6	0.070444	600	-7.50227	1	2	0.070444	200	-1.3309	1175	123	-2.97252	400	2
2	12592023	12592523	AT2G29320	+	1127	2	12586011	12586511	AT2G29290	+	68	Yes	Yes	6012	7	0.070444	700	-9.62918	1	3	0.070444	300	-2.5525	1430	39	-2.57986	400	2
1	29714983	29715483	AT1G78995	+	281	1	29713575	29714075	AT1G78990	+	274	Yes	Yes	1408	8	0.070444	800	-11.5672	1	3	0.070444	300	-2.52567	360	311	-3.418	500	4
1	7209994	7210494	AT1G20760	+	292	1	7208455	7208955	AT1G20750	+	71	Yes	NA	1539	6	0.070444	600	-7.57889	1	1	0.070444	100	-0.45372	274	59	-5.72079	500	2
3	5582556	5583056	AT3G16430	+	992	3	5562455	5562955	AT3G16390	+	1158	Yes	Yes	20101	6	0.070444	600	-7.43875	1	3	0.070444	300	-2.52334	920	834	-1.69047	300	2
2	13612020	13612520	AT2G31990	+	436	2	13609072	13609572	AT2G31980	+	56	Yes	NA	2948	10	0.070444	1000	-16.7082	0.017411	2	0.070444	200	-1.33092	347	69	-8.68021	800	-6
3	4769518	4770018	AT3G14300	+	911	3	4764419	4764919	AT3G14290	+	29	Yes	NA	5099	7	0.070444	700	-9.98071	1	1	0.070444	100	-0.447365	920	26	-7.86742	600	-2
1	3869974	3870474	AT1G11490	+	1216	1	3856964	3857464	AT1G11460	+	141	Yes	NA	13010	6	0.070444	600	-7.5028	1	3	0.070444	300	-2.52821	1438	185	-1.69634	300	2
1	20527867	20528367	AT1G55020	+	74	1	20516929	20517429	AT1G55010	+	890	NA	Yes	10938	11	0.070444	1100	-19.0665	0.001842	2	0.070444	200	-1.33095	47	940	-10.6525	900	-6
3	2141418	2141918	AT3G06778	+	1105	3	2129872	2130372	AT3G06750	+	84	Yes	NA	11546	6	0.070444	600	-7.55488	1	5	0.070444	500	-5.68801	1278	83	-0.570973	100	2
1	552041	552541	AT1G02590	+	1480	1	541072	541572	AT1G02570	+	72	Yes	NA	10969	7	0.070444	700	-9.61557	1	0	0	0	0	0	0	0	700	2
2	18966494	18966994	AT2G46170	+	110	2	18957441	18957941	AT2G46130	+	958	NA	Yes	9053	10	0.070444	1000	-16.3527	0.023522	6	0.070444	600	-7.50987	129	1116	-1.91194	400	6
2	10348698	10349198	AT2G24330	+	656	2	10346482	10346982	AT2G24320	+	86	Yes	NA	2216	13	0.070444	1300	-24.2974	1.2e-05	7	0.070444	700	-9.5533	748	99	-3.06115	600	8
2	10404487	10404987	AT2G24510	+	122	2	10395465	10395965	AT2G24470	+	932	NA	Yes	9022	6	0.070444	600	-7.51464	1	5	0.070444	500	-5.66274	122	827	-0.574145	100	2
1	28138894	28139394	AT1G74920	+	43	1	28133916	28134416	AT1G74900	+	1858	NA	Yes	4978	10	0.070444	1000	-16.9408	0.013938	0	0	0	0	0	0	0	1000	6
1	23560992	23561492	AT1G63520	+	303	1	23556916	23557416	AT1G63500	+	493	Yes	Yes	4076	10	0.070444	1000	-16.1316	0.02804	4	0.070444	400	-3.97654	258	535	-3.89018	600	6
1	552057	552557	AT1G02590	+	1480	1	543062	543562	AT1G02575	+	152	Yes	NA	8995	22	0.070444	2200	-50.8881	0	0	0	0	0	0	0	0	2200	20
2	7937491	7937991	AT2G18245	+	167	2	7912880	7913380	AT2G18180	+	1401	NA	Yes	24611	6	0.070444	600	-7.49103	1	2	0.070444	200	-1.3309	176	1360	-2.96381	400	2
1	23405525	23406025	AT1G63110	+	66	1	23386950	23387450	AT1G63070	+	1125	NA	Yes	18575	6	0.070444	600	-7.59074	1	2	0.070444	200	-1.33093	57	1342	-3.00717	400	2
2	19666976	19667476	AT2G48080	+	597	2	19662076	19662576	AT2G48060	+	62	Yes	NA	4900	9	0.070444	900	-14.1828	0.188453	6	0.070444	600	-7.60462	596	61	-1.39198	300	4
1	19396913	19397413	AT1G52120	+	108	1	19388893	19389393	AT1G52110	+	1266	NA	Yes	8020	10	0.070444	1000	-16.3593	0.023402	5	0.070444	500	-5.66911	109	1266	-2.75654	500	6
1	17418461	17418961	AT1G47480	+	902	1	17396446	17396946	AT1G47420	+	755	Yes	Yes	22015	6	0.070444	600	-7.44203	1	2	0.070444	200	-1.33089	861	802	-2.94832	400	2
1	17603556	17604056	AT1G47810	+	1241	1	17600478	17600978	AT1G47790	+	649	Yes	Yes	3078	35	0.070444	3500	-93.9898	0	25	0.070444	2500	-59.3248	1289	776	-3.05818	1000	36
2	13927861	13928361	AT2G32830	+	454	2	13925687	13926187	AT2G32820	+	498	Yes	Yes	2174	8	0.070444	800	-11.5357	1	2	0.070444	200	-1.33089	460	533	-5.41944	600	4
2	17150048	17150548	AT2G41140	+	1546	2	17144041	17144541	AT2G41130	+	170	Yes	NA	6007	19	0.070444	1900	-41.2296	0	10	0.070444	1000	-16.24	1680	162	-4.45756	900	16
2	14729917	14730417	AT2G34920	+	118	2	14720179	14720679	AT2G34890	+	578	NA	Yes	9738	7	0.070444	700	-9.52698	1	2	0.070444	200	-1.3309	138	478	-4.14898	500	2
1	26920536	26921036	AT1G71430	+	234	1	26917834	26918334	AT1G71420	+	730	NA	Yes	2702	13	0.070444	1300	-23.7683	2e-05	10	0.070444	1000	-16.1548	255	902	-1.20094	300	8
3	908925	909425	AT3G03680	+	68	3	886025	886525	AT3G03650	+	1670	NA	Yes	22900	7	0.070444	700	-9.62918	1	0	0	0	0	0	0	0	700	2
1	9439594	9440094	AT1G27180	+	867	1	9428071	9428571	AT1G27140	+	672	Yes	NA	11523	9	0.070444	900	-13.74	0.26209	5	0.070444	500	-5.61918	712	806	-2.02016	400	4
1	20105002	20105502	AT1G53850	+	56	1	20090357	20090857	AT1G53815	+	1299	NA	Yes	14645	6	0.070444	600	-7.6211	1	3	0.070444	300	-2.54154	60	1159	-1.71294	300	2
1	994288	994788	AT1G03905	+	873	1	991978	992478	AT1G03900	+	121	Yes	NA	2310	8	0.070444	800	-11.6696	1	2	0.070444	200	-1.3309	656	105	-5.50066	600	4
3	65133	65633	AT3G01180	+	877	3	51489	51989	AT3G01150	+	111	Yes	NA	13644	8	0.070444	800	-11.6864	1	7	0.070444	700	-9.50985	981	135	-0.590106	100	4
3	3993035	3993535	AT3G12580	+	71	3	3978887	3979387	AT3G12550	+	728	NA	Yes	14148	6	0.070444	600	-7.57889	1	2	0.070444	200	-1.33091	76	708	-2.9908	400	2
1	21359321	21359821	AT1G57670	+	622	1	21355044	21355544	AT1G57660	+	46	Yes	NA	4277	6	0.070444	600	-7.66541	1	4	0.070444	400	-4.04229	778	43	-0.991532	200	2
1	11159521	11160021	AT1G31230	+	35	1	11137440	11137940	AT1G31173	+	1301	NA	Yes	22081	6	0.070444	600	-7.74569	1	2	0.070444	200	-1.33096	41	1146	-3.03356	400	2
1	7818040	7818540	AT1G22150	+	580	1	7813978	7814478	AT1G22130	+	1309	Yes	Yes	4062	18	0.070444	1800	-37.5794	0	10	0.070444	1000	-16.072	590	1389	-3.65199	800	14
1	8234118	8234618	AT1G23205	+	1750	1	8217996	8218496	AT1G23180	+	50	Yes	NA	16122	6	0.070444	600	-7.64545	1	3	0.070444	300	-2.5442	1906	53	-1.71634	300	2
2	13408458	13408958	AT2G31470	+	1079	2	13399451	13399951	AT2G31440	+	88	Yes	NA	9007	9	0.070444	900	-14.0334	0.211601	3	0.070444	300	-2.53602	1041	83	-4.56926	600	4
1	7003966	7004466	AT1G20200	+	1096	1	6996031	6996531	AT1G20180	+	85	Yes	NA	7935	10	0.070444	1000	-16.4584	0.021646	0	0.070444	0	1.01271	1120	40	1.01271	1000	6
1	489007	489507	AT1G02400	+	78	1	480851	481351	AT1G02390	+	430	Yes	Yes	8156	6	0.070444	600	-7.56493	1	1	0.070444	100	-0.455949	107	470	-5.67023	500	2
3	2865040	2865540	AT3G09330	+	69	3	2863085	2863585	AT3G09320	+	1468	NA	Yes	1955	16	0.070444	1600	-33.2851	0	6	0.070444	600	-7.58112	70	1410	-7.19333	1000	-12
1	6839035	6839535	AT1G19790	+	1147	1	6833024	6833524	AT1G19770	+	132	Yes	NA	6011	19	0.070444	1900	-41.5158	0	7	0.070444	700	-9.51347	1248	131	-8.4024	1200	-16
2	14145531	14146031	AT2G33380	+	864	2	14144023	14144523	AT2G33370	+	119	Yes	NA	1508	15	0.070444	1500	-29.641	0	6	0.070444	600	-7.52083	969	114	-5.90341	900	10
1	19556532	19557032	AT1G52490	+	889	1	19538923	19539423	AT1G52440	+	1368	Yes	Yes	17609	8	0.070444	800	-11.5124	1	7	0.070444	700	-9.41329	789	1428	-0.596105	100	4
2	8600483	8600983	AT2G19910	+	961	2	8594929	8595429	AT2G19900	+	122	Yes	NA	5554	11	0.070444	1100	-18.8013	0.002303	6	0.070444	600	-7.51686	905	119	-2.54358	500	6
3	6101526	6102026	AT3G17830	+	48	3	6093975	6094475	AT3G17810	+	1345	NA	Yes	7551	7	0.070444	700	-9.73347	1	3	0.070444	300	-2.56078	31	1406	-2.60969	400	2
1	27993970	27994470	AT1G74480	+	188	1	27991150	27991650	AT1G74470	+	404	NA	Yes	2820	10	0.070444	1000	-16.2075	0.026343	3	0.070444	300	-2.52762	204	474	-5.65213	700	6
2	17474995	17475495	AT2G41880	+	154	2	17469097	17469597	AT2G41860	+	1733	NA	Yes	5898	18	0.070444	1800	-38.2671	0	9	0.070444	900	-13.8766	162	1875	-4.70558	900	14
1	25756456	25756956	AT1G68585	+	114	1	25753409	25753909	AT1G68580	+	1573	NA	Yes	3047	23	0.070444	2300	-54.756	0	13	0.070444	1300	-24.0927	113	1574	-4.67534	1000	20
1	10545386	10545886	AT1G30060	+	61	1	10543877	10544377	AT1G30050	+	675	NA	Yes	1509	13	0.070444	1300	-24.6633	9e-06	4	0.070444	400	-4.04629	41	670	-7.84771	900	-8
1	18217078	18217578	AT1G49240	+	166	1	18202112	18202612	AT1G49210	+	1404	NA	Yes	14966	7	0.070444	700	-9.4878	1	4	0.070444	400	-3.98502	155	1469	-1.54738	300	2
2	14451019	14451519	AT2G34220	+	944	2	14443461	14443961	AT2G34204	+	97	Yes	NA	7558	7	0.070444	700	-9.55668	1	2	0.070444	200	-1.33092	1055	66	-4.2044	500	2
2	1983952	1984452	AT2G05420	+	1356	2	1952051	1952551	AT2G05350	+	36	Yes	NA	31901	6	0.070444	600	-7.73621	1	3	0.070444	300	-2.57781	1226	22	-1.76222	300	2
3	5597413	5597913	AT3G16470	+	130	3	5582439	5582939	AT3G16430	+	992	Yes	Yes	14974	6	0.070444	600	-7.50923	1	0	0.070444	0	1.00475	106	920	1.00475	600	2
1	20783445	20783945	AT1G55610	+	722	1	20775484	20775984	AT1G55600	+	84	Yes	NA	7961	7	0.070444	700	-9.58277	1	2	0.070444	200	-1.33091	673	102	-4.16661	500	2
1	23791999	23792499	AT1G64100	+	1672	1	23770075	23770575	AT1G64060	+	432	Yes	Yes	21924	6	0.070444	600	-7.45234	1	3	0.070444	300	-2.52449	1801	456	-1.69184	300	2
1	4794919	4795419	AT1G13990	+	95	1	4781875	4782375	AT1G13970	+	1091	NA	Yes	13044	7	0.070444	700	-9.56022	1	3	0.070444	300	-2.53619	82	1043	-2.52391	400	2
2	19214466	19214966	AT2G46760	+	1593	2	19202040	19202540	AT2G46720	+	82	Yes	NA	12426	6	0.070444	600	-7.55806	1	5	0.070444	500	-5.70289	1394	70	-0.569102	100	2
2	758940	759440	AT2G02710	+	69	2	756977	757477	AT2G02700	+	344	NA	Yes	1963	12	0.070444	1200	-21.7677	0.00014	1	0.070444	100	-0.452824	50	228	-19.4083	1100	-8
1	23791456	23791956	AT1G64100	+	1122	1	23777917	23778417	AT1G64065	+	75	Yes	NA	13539	6	0.070444	600	-7.57058	1	3	0.070444	300	-2.53734	1132	76	-1.70762	300	2
1	551995	552495	AT1G02590	+	1480	1	544467	544967	AT1G02580	+	599	Yes	Yes	7528	11	0.070444	1100	-18.4922	0.00299	0	0	0	0	0	0	0	1100	6
2	18965420	18965920	AT2G46170	+	111	2	18959056	18959556	AT2G46140	+	1456	NA	Yes	6364	15	0.070444	1500	-29.7022	0	9	0.070444	900	-13.9544	114	1305	-2.72354	600	10
2	17109132	17109632	AT2G40995	+	663	2	17102857	17103357	AT2G40980	+	89	Yes	NA	6275	7	0.070444	700	-9.57181	1	3	0.070444	300	-2.53303	656	105	-2.51347	400	2
1	3869521	3870021	AT1G11490	+	1220	1	3863003	3863503	AT1G11475	+	61	Yes	NA	6518	6	0.070444	600	-7.60462	1	1	0.070444	100	-0.450048	1048	34	-5.80749	500	2
1	23333594	23334094	AT1G62981	+	666	1	23325946	23326446	AT1G62970	+	146	Yes	NA	7648	13	0.070444	1300	-23.949	1.7e-05	7	0.070444	700	-9.48237	759	176	-3.00144	600	8
2	13159479	13159979	AT2G30920	+	64	2	13150616	13151116	AT2G30900	+	934	NA	Yes	8863	6	0.070444	600	-7.59602	1	3	0.070444	300	-2.53602	83	775	-1.70597	300	2
2	6806494	6806994	AT2G15610	+	38	2	6801908	6802408	AT2G15590	+	864	NA	Yes	4586	8	0.070444	800	-12.1022	1	2	0.070444	200	-1.33138	16	867	-6.24467	600	4
2	11258555	11259055	AT2G26460	+	610	2	11247412	11247912	AT2G26440	+	688	Yes	Yes	11143	6	0.070444	600	-7.44531	1	1	0.070444	100	-0.458263	714	706	-5.61926	500	2
3	3603578	3604078	AT3G11440	+	54	3	3599717	3600217	AT3G11435	+	517	NA	Yes	3861	6	0.070444	600	-7.62858	1	1	0.070444	100	-0.453156	53	526	-5.73382	500	2
2	19666997	19667497	AT2G48080	+	597	2	19662910	19663410	AT2G48070	+	113	Yes	NA	4087	12	0.070444	1200	-21.4185	0.000192	3	0.070444	300	-2.53552	596	86	-8.49869	900	-8
1	7430564	7431064	AT1G21230	+	1238	1	7422023	7422523	AT1G21200	+	85	Yes	NA	8541	10	0.070444	1000	-16.4584	0.021646	5	0.070444	500	-5.69774	1008	74	-2.79231	500	6
1	24170480	24170980	AT1G65060	+	830	1	24162963	24163463	AT1G65040	+	70	Yes	NA	7517	7	0.070444	700	-9.62217	1	4	0.070444	400	-4.00274	841	85	-1.55577	300	2
2	15474608	15475108	AT2G36870	+	1003	2	15463423	15463923	AT2G36850	+	52	Yes	NA	11185	6	0.070444	600	-7.63667	1	4	0.070444	400	-4.02578	1005	54	-0.991374	200	2
1	29483976	29484476	AT1G78370	+	863	1	29482489	29482989	AT1G78360	+	211	Yes	NA	1487	24	0.070444	2400	-56.9964	0	18	0.070444	1800	-37.926	1043	240	-1.9942	600	22
2	14510500	14511000	AT2G34370	+	1190	2	14495574	14496074	AT2G34350	+	364	Yes	Yes	14926	7	0.070444	700	-9.43625	1	1	0.070444	100	-0.457714	1118	303	-7.46265	600	-2
1	20104956	20105456	AT1G53850	+	56	1	20092363	20092863	AT1G53820	+	549	NA	Yes	12593	6	0.070444	600	-7.6211	1	1	0.070444	100	-0.453803	60	549	-5.71888	500	2
2	1176118	1176618	AT2G03850	+	314	2	1171981	1172481	AT2G03830	+	742	Yes	Yes	4137	10	0.070444	1000	-16.1272	0.028137	3	0.070444	300	-2.52557	319	527	-5.6228	700	6
1	19332959	19333459	AT1G52000	+	120	1	19331562	19332062	AT1G51990	+	587	Yes	Yes	1397	16	0.070444	1600	-32.5356	0	9	0.070444	900	-13.9454	118	475	-3.34589	700	12
1	9440020	9440520	AT1G27180	+	768	1	9430023	9430523	AT1G27150	+	157	Yes	NA	9997	7	0.070444	700	-9.49328	1	5	0.070444	500	-5.65797	774	134	-0.957065	200	2
2	14510506	14511006	AT2G34370	+	1190	2	14497927	14498427	AT2G34355	+	202	Yes	NA	12579	7	0.070444	700	-9.4708	1	4	0.070444	400	-3.98237	1118	177	-1.54615	300	2
2	989032	989532	AT2G03260	+	33	2	986163	986663	AT2G03250	+	394	NA	Yes	2869	6	0.070444	600	-7.76652	1	1	0.070444	100	-0.441278	17	409	-6.03366	500	2
1	11312570	11313070	AT1G31600	+	46	1	11311009	11311509	AT1G31580	+	581	NA	Yes	1561	7	0.070444	700	-9.74922	1	2	0.070444	200	-1.33093	60	707	-4.21534	500	2
2	14511341	14511841	AT2G34370	+	1226	2	14498524	14499024	AT2G34357	+	114	Yes	NA	12817	8	0.070444	800	-11.681	1	2	0.070444	200	-1.33091	1316	87	-5.52316	600	4
1	10164004	10164504	AT1G29090	+	727	1	10152623	10153123	AT1G29071	+	47	Yes	NA	11381	6	0.070444	600	-7.66008	1	2	0.070444	200	-1.33094	793	51	-3.01502	400	2
1	19021124	19021624	AT1G51310	+	101	1	19012181	19012681	AT1G51290	+	1314	NA	Yes	8943	9	0.070444	900	-13.9886	0.218454	1	0.070444	100	-0.453961	62	1301	-11.8515	800	-4
2	16859537	16860037	AT2G40370	+	70	2	16849493	16849993	AT2G40340	+	1694	NA	Yes	10044	8	0.070444	800	-11.808	1	5	0.070444	500	-5.69313	78	1674	-1.45741	300	4
1	7820543	7821043	AT1G22150	+	115	1	7815382	7815882	AT1G22140	+	739	Yes	Yes	5161	9	0.070444	900	-13.9521	0.224107	2	0.070444	200	-1.3309	107	764	-6.9672	700	-4
1	26723470	26723970	AT1G70880	+	1434	1	26704009	26704509	AT1G70810	+	197	Yes	NA	19461	6	0.070444	600	-7.48136	1	1	0.070444	100	-0.457403	1471	229	-5.63802	500	2
1	8234111	8234611	AT1G23205	+	1750	1	8223508	8224008	AT1G23190	+	44	Yes	NA	10603	6	0.070444	600	-7.67684	1	2	0.070444	200	-1.33095	1906	47	-3.02143	400	2
2	13408448	13408948	AT2G31470	+	1079	2	13403475	13403975	AT2G31450	+	121	Yes	NA	4973	11	0.070444	1100	-18.8046	0.002296	5	0.070444	500	-5.67387	1041	101	-3.56757	600	6
2	17836017	17836517	AT2G42870	+	61	2	17831870	17832370	AT2G42850	+	1493	NA	Yes	4147	11	0.070444	1100	-19.2157	0.001608	2	0.070444	200	-1.33096	44	1457	-10.7039	900	-6
1	6294434	6294934	AT1G18280	+	706	1	6282457	6282957	AT1G18265	+	67	Yes	NA	11977	7	0.070444	700	-9.63285	1	3	0.070444	300	-2.53674	651	79	-2.52574	400	2
1	21474057	21474557	AT1G58037	+	620	1	21459481	21459981	AT1G58025	+	38	Yes	NA	14576	6	0.070444	600	-7.71885	1	0	0.070444	0	1.01456	606	35	1.01456	600	2
1	10203074	10203574	AT1G29195	+	464	1	10193541	10194041	AT1G29170	+	964	Yes	Yes	9533	10	0.070444	1000	-16.089	0.029036	5	0.070444	500	-5.62199	541	857	-2.70031	500	6
2	8662118	8662618	AT2G20070	+	1394	2	8658571	8659071	AT2G20060	+	62	Yes	NA	3547	17	0.070444	1700	-36.6141	0	8	0.070444	800	-11.871	1503	59	-5.42836	900	14
2	12364975	12365475	AT2G28810	+	106	2	12358639	12359139	AT2G28800	+	1414	NA	Yes	6336	8	0.070444	800	-11.696	1	5	0.070444	500	-5.65946	130	1487	-1.44859	300	4
2	16907418	16907918	AT2G40475	+	137	2	16889396	16889896	AT2G40440	+	1508	NA	Yes	18022	10	0.070444	1000	-16.2832	0.024813	1	0.070444	100	-0.456117	114	1450	-13.9544	900	-6
1	5290825	5291325	AT1G15380	+	353	1	5283899	5284399	AT1G15360	+	718	Yes	Yes	6926	7	0.070444	700	-9.43759	1	2	0.070444	200	-1.33089	279	701	-4.12423	500	2
3	1219090	1219590	AT3G04520	+	1545	3	1211506	1212006	AT3G04500	+	56	Yes	NA	7584	9	0.070444	900	-14.2384	0.179551	5	0.070444	500	-5.69424	1512	77	-2.06935	400	4
1	21399455	21399955	AT1G57775	+	49	1	21395542	21396042	AT1G57770	+	1486	NA	Yes	3913	9	0.070444	900	-14.3218	0.166357	4	0.070444	400	-4.08715	28	1201	-3.27611	500	4
2	11201829	11202329	AT2G26310	+	833	2	11200568	11201068	AT2G26300	+	101	Yes	Yes	1261	9	0.070444	900	-13.9886	0.218454	3	0.070444	300	-2.53798	913	73	-4.58943	600	4
1	19556075	19556575	AT1G52490	+	923	1	19546042	19546542	AT1G52450	+	106	Yes	NA	10033	9	0.070444	900	-13.9744	0.220606	5	0.070444	500	-5.6714	981	105	-2.05395	400	4
1	10868023	10868523	AT1G30650	+	238	1	10860581	10861081	AT1G30640	+	840	Yes	Yes	7442	10	0.070444	1000	-16.1653	0.02726	4	0.070444	400	-3.97526	287	935	-3.88564	600	6
3	6101406	6101906	AT3G17830	+	48	3	6097079	6097579	AT3G17820	+	541	NA	Yes	4327	6	0.070444	600	-7.65499	1	1	0.070444	100	-0.449205	31	598	-5.82799	500	2
3	343432	343932	AT3G02020	+	1660	3	332500	333000	AT3G02000	+	97	Yes	NA	10932	9	0.070444	900	-14.0011	0.216462	8	0.070444	800	-11.7089	1702	100	-0.592596	100	4
2	17475389	17475889	AT2G41880	+	82	2	17471406	17471906	AT2G41870	+	712	NA	Yes	3983	6	0.070444	600	-7.55806	1	1	0.070444	100	-0.454502	70	559	-5.70289	500	2
3	1749460	1749960	AT3G05858	+	1858	3	1734456	1734956	AT3G05820	+	33	Yes	NA	15004	7	0.070444	700	-9.90267	1	0	0	0	0	0	0	0	700	2
2	15393010	15393510	AT2G36720	+	112	2	15391040	15391540	AT2G36710	+	1143	NA	Yes	1970	23	0.070444	2300	-54.7985	0	10	0.070444	1000	-16.3884	100	777	-8.07277	1300	-20
1	45876	46376	AT1G01080	+	914	1	36381	36881	AT1G01060	+	50	Yes	NA	9495	7	0.070444	700	-9.71906	1	3	0.070444	300	-2.5451	1067	51	-2.55402	400	2
2	14450630	14451130	AT2G34220	+	1195	2	14449887	14450387	AT2G34210	+	115	Yes	Yes	743	11	0.070444	1100	-18.8256	0.002257	3	0.070444	300	-2.53188	1523	117	-7.0071	800	-6
3	842527	843027	AT3G03530	+	116	3	839639	840139	AT3G03520	+	311	Yes	Yes	2888	6	0.070444	600	-7.5192	1	3	0.070444	300	-2.53074	132	430	-1.69944	300	2
2	1983923	1984423	AT2G05420	+	1356	2	1959014	1959514	AT2G05360	+	98	Yes	NA	24909	6	0.070444	600	-7.53633	1	2	0.070444	200	-1.33091	1226	91	-2.98285	400	2
2	17786090	17786590	AT2G42720	+	1267	2	17781002	17781502	AT2G42700	+	57	Yes	NA	5088	12	0.070444	1200	-21.965	0.000116	3	0.070444	300	-2.54188	1349	59	-8.68084	900	-8
1	18198504	18199004	AT1G49200	+	1748	1	18191008	18191508	AT1G49190	+	62	Yes	Yes	7496	9	0.070444	900	-14.1828	0.188453	2	0.070444	200	-1.33097	1900	39	-7.26043	700	-4
3	1650460	1650960	AT3G05660	+	68	3	1635989	1636489	AT3G05630	+	1240	NA	Yes	14471	7	0.070444	700	-9.62918	1	1	0.070444	100	-0.454314	67	1292	-7.58823	600	-2
3	72944	73444	AT3G01210	+	662	3	59642	60142	AT3G01175	+	1303	Yes	Yes	13302	7	0.070444	700	-9.41705	1	5	0.072933	482.937	-5.61844	777	1815	-1.43825	217.063	2
1	2125427	2125927	AT1G06920	+	454	1	2118584	2119084	AT1G06900	+	34	Yes	NA	6843	6	0.070444	600	-7.75577	1	4	0.070444	400	-4.0235	502	56	-0.991355	200	2
2	13415617	13416117	AT2G31500	+	67	2	13405408	13405908	AT2G31460	+	1887	NA	Yes	10209	6	0.070444	600	-7.58823	1	2	0.070444	200	-1.33093	60	2000	-3.00386	400	2
2	1697556	1698056	AT2G04840	+	616	2	1689493	1689993	AT2G04810	+	539	Yes	Yes	8063	9	0.070444	900	-13.7505	0.26019	4	0.070444	400	-3.97068	587	481	-2.98799	500	4
1	3869521	3870021	AT1G11490	+	1220	1	3864037	3864537	AT1G11480	+	112	Yes	Yes	5484	7	0.070444	700	-9.5343	1	1	0.070444	100	-0.456285	1048	122	-7.51464	600	-2
3	2141356	2141856	AT3G06778	+	1105	3	2135984	2136484	AT3G06770	+	284	Yes	Yes	5372	21	0.070444	2100	-47.0227	0	7	0.070444	700	-9.44593	1278	297	-10.3048	1400	-18
1	9841116	9841616	AT1G28170	+	1252	1	9826032	9826532	AT1G28130	+	431	Yes	Yes	15084	7	0.070444	700	-9.42961	1	6	0.070444	600	-7.44927	1104	495	-0.588246	100	2
2	19214500	19215000	AT2G46760	+	1593	2	19204460	19204960	AT2G46735	+	284	Yes	NA	10040	15	0.070444	1500	-29.1633	0	12	0.070444	1200	-21.0811	1394	324	-1.15062	300	10
2	1687484	1687984	AT2G04800	+	574	2	1677011	1677511	AT2G04780	+	50	Yes	NA	10473	7	0.070444	700	-9.71906	1	4	0.070444	400	-4.01757	428	62	-1.56297	300	2
2	18965985	18966485	AT2G46170	+	51	2	18961574	18962074	AT2G46150	+	1413	NA	Yes	4411	10	0.070444	1000	-16.7824	0.016243	3	0.070444	300	-2.54659	48	1446	-5.94111	700	6
1	23333569	23334069	AT1G62981	+	666	1	23332486	23332986	AT1G62980	+	211	Yes	NA	1083	30	0.070444	3000	-77.655	0	19	0.070444	1900	-41.1002	759	196	-4.22894	1100	30
2	12440957	12441457	AT2G28960	+	160	2	12432471	12432971	AT2G28950	+	1087	NA	Yes	8486	10	0.070444	1000	-16.2429	0.025614	1	0.070444	100	-0.456593	140	1133	-13.9054	900	-6
2	11258496	11258996	AT2G26460	+	610	2	11251471	11251971	AT2G26450	+	116	Yes	NA	7025	9	0.070444	900	-13.9498	0.224464	1	0.070444	100	-0.455815	714	102	-11.7045	800	-4
1	24415580	24416080	AT1G65650	+	108	1	24407461	24407961	AT1G65630	+	735	NA	Yes	8119	6	0.070444	600	-7.52609	1	4	0.070444	400	-3.98855	133	808	-0.991155	200	2
1	28005072	28005572	AT1G74510	+	78	1	27996549	27997049	AT1G74490	+	807	NA	Yes	8523	6	0.070444	600	-7.56493	1	3	0.070444	300	-2.54223	58	844	-1.71382	300	2
1	8395506	8396006	AT1G23730	+	1266	1	8385503	8386003	AT1G23710	+	111	Yes	NA	10003	14	0.070444	1400	-26.864	1e-06	12	0.070444	1200	-21.4648	1358	104	-0.858278	200	10
2	17234936	17235436	AT2G41360	+	851	2	17227441	17227941	AT2G41330	+	191	Yes	NA	7495	6	0.070444	600	-7.48305	1	1	0.070444	100	-0.457397	771	228	-5.63815	500	2
1	7430591	7431091	AT1G21230	+	1238	1	7425429	7425929	AT1G21210	+	67	Yes	NA	5162	8	0.070444	800	-11.823	1	3	0.070444	300	-2.5409	1008	62	-3.51264	500	4
2	17988481	17988981	AT2G43270	+	1397	2	17976987	17977487	AT2G43250	+	63	Yes	NA	11494	6	0.070444	600	-7.59879	1	1	0.070444	100	-0.454036	1249	63	-5.71353	500	2
1	29696015	29696515	AT1G78960	+	73	1	29692957	29693457	AT1G78955	+	1352	NA	Yes	3058	16	0.070444	1600	-33.1849	0	5	0.070444	500	-5.72079	59	1388	-9.31515	1100	-12
1	1633057	1633557	AT1G05520	+	166	1	1622505	1623005	AT1G05490	+	823	Yes	Yes	10552	10	0.070444	1000	-16.2343	0.025794	2	0.070444	200	-1.3309	204	862	-8.45418	800	-6
2	14511414	14511914	AT2G34370	+	1226	2	14509904	14510404	AT2G34360	+	389	Yes	Yes	1510	27	0.070444	2700	-66.379	0	10	0.070444	1000	-16.1492	1316	265	-11.4395	1700	-26
2	17988559	17989059	AT2G43270	+	1397	2	17979988	17980488	AT2G43255	+	94	Yes	NA	8571	10	0.070444	1000	-16.4136	0.022428	6	0.070444	600	-7.53411	1249	100	-1.92219	400	6
2	1175439	1175939	AT2G03850	+	341	2	1172938	1173438	AT2G03840	+	558	Yes	Yes	2501	23	0.070444	2300	-53.2597	0	7	0.070444	700	-9.43392	385	560	-12.5947	1600	-20
1	19295504	19296004	AT1G51940	+	665	1	19292901	19293401	AT1G51913	+	345	Yes	Yes	2603	9	0.070444	900	-13.7806	0.254405	8	0.070444	800	-11.5531	904	333	-0.600132	100	4
1	10378473	10378973	AT1G29680	+	1373	1	10372445	10372945	AT1G29660	+	364	Yes	Yes	6028	10	0.070444	1000	-16.1109	0.02852	5	0.070444	500	-5.62446	1471	447	-2.70317	500	6
2	7197406	7197906	AT2G16594	+	38	2	7181521	7182021	AT2G16570	+	1817	NA	Yes	15885	10	0.070444	1000	-17.0779	0.012182	8	0.070444	800	-11.9759	47	1942	-0.898826	200	6
1	19296555	19297055	AT1G51940	+	95	1	19293576	19294076	AT1G51915	+	523	Yes	Yes	2979	6	0.070444	600	-7.53983	1	3	0.070444	300	-2.53972	66	619	-1.71063	300	2
3	907521	908021	AT3G03680	+	116	3	902197	902697	AT3G03670	+	1043	NA	Yes	5324	13	0.070444	1300	-24.0761	1.5e-05	3	0.070444	300	-2.53262	109	1055	-9.90715	1000	-8
1	19038566	19039066	AT1G51350	+	94	1	19029541	19030041	AT1G51330	+	1264	NA	Yes	9025	8	0.070444	800	-11.7235	1	2	0.070444	200	-1.33091	94	1169	-5.51334	600	4
1	26806444	26806944	AT1G71060	+	52	1	26799551	26800051	AT1G71040	+	628	NA	Yes	6893	7	0.070444	700	-9.70582	1	2	0.070444	200	-1.33092	68	545	-4.2012	500	2
1	24029009	24029509	AT1G64660	+	1648	1	24024981	24025481	AT1G64650	+	131	Yes	NA	4028	12	0.070444	1200	-21.3458	0.000204	3	0.070444	300	-2.53462	1738	92	-8.47366	900	-8
3	65119	65619	AT3G01180	+	877	3	57478	57978	AT3G01170	+	182	Yes	NA	7641	10	0.070444	1000	-16.2142	0.026205	7	0.070444	700	-9.45985	981	235	-1.31337	300	6
1	3873036	3873536	AT1G11520	+	161	1	3866620	3867120	AT1G11480	+	606	NA	Yes	6416	7	0.070444	700	-9.49077	1	1	0.070444	100	-0.456719	149	779	-7.49874	600	-2
1	7899510	7900010	AT1G22370	+	1699	1	7886861	7887361	AT1G22330	+	305	Yes	Yes	12649	7	0.070444	700	-9.44455	1	3	0.070444	300	-2.52679	1581	239	-2.49323	400	2
1	6294386	6294886	AT1G18280	+	706	1	6291009	6291509	AT1G18270	+	52	Yes	NA	3377	9	0.070444	900	-14.2831	0.172462	3	0.070444	300	-2.5525	651	39	-4.74517	600	4
2	8986368	8986868	AT2G20880	+	1889	2	8966441	8966941	AT2G20825	+	77	Yes	NA	19927	6	0.070444	600	-7.56677	1	0	0	0	0	0	0	0	600	2
1	556964	557464	AT1G02620	+	57	1	552046	552546	AT1G02590	+	1480	NA	Yes	4918	6	0.070444	600	-7.61756	1	0	0	0	0	0	0	0	600	2
1	26723097	26723597	AT1G70880	+	916	1	26706347	26706847	AT1G70820	+	662	Yes	Yes	16750	6	0.070444	600	-7.44397	1	3	0.070444	300	-2.52348	957	758	-1.69063	300	2
2	13407510	13408010	AT2G31470	+	766	2	13404981	13405481	AT2G31460	+	1067	Yes	Yes	2529	28	0.070444	2800	-69.3195	0	6	0.070444	600	-7.44517	615	860	-22.2945	2200	-26
2	14837003	14837503	AT2G35210	+	610	2	14833563	14834063	AT2G35200	+	68	Yes	NA	3440	16	0.070444	1600	-33.3122	0	9	0.070444	900	-14.1446	623	67	-3.49248	700	12
2	16907942	16908442	AT2G40475	+	157	2	16892320	16892820	AT2G40450	+	698	NA	Yes	15622	6	0.070444	600	-7.49509	1	2	0.070444	200	-1.3309	150	635	-2.9673	400	2
1	5291046	5291546	AT1G15380	+	353	1	5287009	5287509	AT1G15370	+	157	Yes	NA	4037	6	0.070444	600	-7.49509	1	1	0.070444	100	-0.456607	279	141	-5.65557	500	2
3	1219072	1219572	AT3G04520	+	1545	3	1216084	1216584	AT3G04510	+	99	Yes	NA	2988	21	0.070444	2100	-48.4202	0	16	0.070444	1600	-32.9455	1512	85	-1.80144	500	18
1	19556931	19557431	AT1G52490	+	330	1	19551041	19551541	AT1G52460	+	727	Yes	Yes	5890	9	0.070444	900	-13.7845	0.253598	1	0.070444	100	-0.457925	388	610	-11.5438	800	-4
1	29498552	29499052	AT1G78400	+	902	1	29484171	29484671	AT1G78370	+	863	Yes	Yes	14381	8	0.070444	800	-11.5132	1	2	0.070444	200	-1.33089	927	1043	-5.40768	600	4
2	14837025	14837525	AT2G35210	+	610	2	14835499	14835999	AT2G35208	+	55	Yes	NA	1526	13	0.070444	1300	-24.8057	8e-06	11	0.070444	1100	-19.3471	623	53	-0.867038	200	8
2	14685542	14686042	AT2G34810	+	1776	2	14681981	14682481	AT2G34800	+	140	Yes	NA	3561	12	0.070444	1200	-21.3167	0.000209	0	0	0	0	0	0	0	1200	8
1	29512559	29513059	AT1G78440	+	1636	1	29502455	29502955	AT1G78410	+	113	Yes	NA	10104	6	0.070444	600	-7.52167	1	5	0.070444	500	-5.66274	1861	122	-0.574145	100	2
2	13725565	13726065	AT2G32310	+	131	2	13723009	13723509	AT2G32300	+	1128	NA	Yes	2556	17	0.070444	1700	-35.4136	0	10	0.070444	1000	-16.2772	140	1170	-3.15941	700	12
2	12768037	12768537	AT2G29950	+	595	2	12756997	12757497	AT2G29930	+	103	Yes	NA	11040	7	0.070444	700	-9.54692	1	3	0.070444	300	-2.53893	661	69	-2.53306	400	2
1	45913	46413	AT1G01080	+	914	1	38991	39491	AT1G01070	+	110	Yes	Yes	6922	15	0.070444	1500	-29.7106	0	4	0.070444	400	-3.99434	1067	108	-9.94166	1100	-10
2	1008866	1009366	AT2G03330	+	1276	2	1003013	1003513	AT2G03300	+	81	Yes	NA	5853	11	0.070444	1100	-19.0071	0.001939	1	0.070444	100	-0.453883	1470	61	-16.647	1000	-6
2	8253907	8254407	AT2G19050	+	352	2	8239978	8240478	AT2G18990	+	949	Yes	Yes	13929	9	0.070444	900	-13.779	0.25474	2	0.070444	200	-1.3309	212	1121	-6.89067	700	4
2	5935569	5936069	AT2G14100	+	1112	2	5926488	5926988	AT2G14080	+	80	Yes	NA	9081	13	0.070444	1300	-24.3629	1.2e-05	3	0.070444	300	-2.53821	817	72	-10.1083	1000	-8
3	6545100	6545600	AT3G18970	+	70	3	6537543	6538043	AT3G18950	+	1693	NA	Yes	7557	7	0.070444	700	-9.62217	1	2	0.070444	200	-1.33093	58	1779	-4.21952	500	2
2	17785474	17785974	AT2G42720	+	990	2	17782472	17782972	AT2G42710	+	144	Yes	NA	3002	25	0.070444	2500	-61.0131	0	14	0.070444	1400	-26.6876	1067	144	-5.06582	1100	24
3	1649870	1650370	AT3G05660	+	80	3	1643018	1643518	AT3G05640	+	971	NA	Yes	6852	7	0.070444	700	-9.59257	1	5	0.070444	500	-5.68523	86	1323	-0.957147	200	2
1	7466478	7466978	AT1G21323	+	385	1	7465451	7465951	AT1G21320	+	1639	Yes	Yes	1027	40	0.070444	4000	-113.295	0	24	0.070444	2400	-56.4395	373	1795	-6.14631	1600	44
3	71952	72452	AT3G01210	+	194	3	66486	66986	AT3G01185	+	809	Yes	NA	5466	6	0.070444	600	-7.48219	1	2	0.070444	200	-1.3309	151	954	-2.96714	400	2
2	13414545	13415045	AT2G31500	+	117	2	13408428	13408928	AT2G31470	+	1079	NA	Yes	6117	6	0.070444	600	-7.51841	1	4	0.070444	400	-3.99584	103	1041	-0.991183	200	2
1	26577052	26577552	AT1G70510	+	55	1	26568155	26568655	AT1G70500	+	892	NA	Yes	8897	6	0.070444	600	-7.62477	1	3	0.070444	300	-2.55422	37	881	-1.72945	300	2
1	24589475	24589975	AT1G66050	+	386	1	24585937	24586437	AT1G66040	+	969	NA	Yes	3538	10	0.070444	1000	-16.1051	0.028661	6	0.070444	600	-7.46092	319	1093	-1.89184	400	6
1	26414018	26414518	AT1G70140	+	910	1	26404873	26405373	AT1G70100	+	115	Yes	NA	9145	6	0.070444	600	-7.52001	1	2	0.070444	200	-1.33091	1054	96	-2.98077	400	2
2	1687171	1687671	AT2G04800	+	841	2	1679550	1680050	AT2G04790	+	52	Yes	NA	7621	10	0.070444	1000	-16.7663	0.016494	5	0.070444	500	-5.74156	938	50	-2.8496	500	6
1	9841091	9841591	AT1G28170	+	1252	1	9833469	9833969	AT1G28140	+	70	Yes	NA	7622	6	0.070444	600	-7.58112	1	2	0.070444	200	-1.33091	1104	75	-2.99145	400	2
1	26789491	26789991	AT1G71015	+	85	1	26773046	26773546	AT1G71002	+	995	NA	Yes	16445	6	0.070444	600	-7.55334	1	1	0.070444	100	-0.45418	65	882	-5.71025	500	2
2	607489	607989	AT2G02300	+	68	2	604469	604969	AT2G02290	+	1189	NA	Yes	3020	24	0.070444	2400	-60.039	0	12	0.070444	1200	-21.9856	56	1112	-7.24822	1200	-22
1	23626481	23626981	AT1G63700	+	50	1	23614584	23615084	AT1G63680	+	1523	NA	Yes	11897	6	0.070444	600	-7.64545	1	1	0.070444	100	-0.45418	65	1614	-5.71025	500	2
3	120591	121091	AT3G01323	+	400	3	119490	119990	AT3G01331	+	148	Yes	Yes	1101	7	0.070444	700	-9.49945	1	1	0.070444	100	-0.456323	354	124	-7.51322	600	-2
1	4274538	4275038	AT1G12550	+	925	1	4264489	4264989	AT1G12500	+	96	Yes	NA	10049	6	0.070444	600	-7.53864	1	4	0.070444	400	-4.00183	1065	87	-0.991211	200	2
3	122019	122519	AT3G01324	+	458	3	119558	120058	AT3G01331	+	148	Yes	Yes	2461	6	0.070444	600	-7.49922	1	1	0.070444	100	-0.456323	292	124	-5.66188	500	2
3	119573	120073	AT3G01331	+	148	3	115383	115883	AT3G01326	+	780	Yes	Yes	4190	7	0.070444	700	-9.49945	1	5	0.070444	500	-5.66188	124	692	-0.957075	200	2
2	18162623	18163123	AT2G43860	+	527	2	18157996	18158496	AT2G43840	+	126	NA	Yes	4627	6	0.070444	600	-7.51185	1	3	0.070444	300	-2.53409	604	96	-1.70356	300	2
1	24417458	24417958	AT1G65650	+	123	1	24412541	24413041	AT1G65640	+	844	NA	Yes	4917	8	0.070444	800	-11.6666	1	3	0.070444	300	-2.53081	131	796	-3.44925	500	4
1	8395634	8396134	AT1G23730	+	1266	1	8391014	8391514	AT1G23720	+	50	Yes	Yes	4620	6	0.070444	600	-7.64545	1	5	0.070444	500	-5.79584	1358	36	-0.557339	100	2
3	397499	397999	AT3G02170	+	102	3	394404	394904	AT3G02160	+	1331	NA	Yes	3095	24	0.070444	2400	-58.4634	0	12	0.070444	1200	-21.6621	78	1221	-6.73768	1200	22
1	26216503	26217003	AT1G69690	+	1584	1	26199938	26200438	AT1G69660	+	1011	Yes	Yes	16565	6	0.083882	503.879	-7.43855	1	3	0.132016	160.081	-2.52283	1915	1333	-4.18785	343.797	2
3	119905	120405	AT3G01331	+	190	3	118576	119076	AT3G01329	+	787	Yes	Yes	1329	10	0.070444	1000	-16.2054	0.026389	8	0.070444	800	-11.5759	247	779	-0.897861	200	6
1	17418549	17419049	AT1G47480	+	902	1	17402611	17403111	AT1G47450	+	491	Yes	Yes	15938	8	0.070444	800	-11.5321	1	6	0.070444	600	-7.44588	861	590	-0.932177	200	4
2	17235461	17235961	AT2G41360	+	696	2	17229463	17229963	AT2G41340	+	657	Yes	Yes	5998	10	0.070444	1000	-16.0656	0.029578	2	0.070444	200	-1.33089	720	607	-8.38158	800	-6
2	13704439	13704939	AT2G32270	+	74	2	13674536	13675036	AT2G32190	+	1393	NA	Yes	29903	7	0.070444	700	-9.60933	1	1	0.070444	100	-0.454674	73	1333	-7.57462	600	-2
1	25132553	25133053	AT1G67190	+	69	1	25126474	25126974	AT1G67160	+	1876	NA	Yes	6079	10	0.070444	1000	-16.5686	0.019741	0	0	0	0	0	0	0	1000	6
1	4933058	4933558	AT1G14420	+	1456	1	4925486	4925986	AT1G14390	+	90	Yes	NA	7572	14	0.070444	1400	-27.0479	1e-06	7	0.070444	700	-9.58513	1601	83	-3.84086	700	10
2	17988566	17989066	AT2G43270	+	1397	2	17986495	17986995	AT2G43261	+	839	Yes	Yes	2071	45	0.070444	4500	-131.251	0	29	0.070444	2900	-72.8531	1249	611	-5.37822	1600	50
1	4952396	4952896	AT1G14460	+	53	1	4934103	4934603	AT1G14430	+	1690	NA	Yes	18293	6	0.070444	600	-7.63255	1	5	0.070444	500	-5.70289	70	2034	-0.569102	100	2
2	13783915	13784415	AT2G32460	+	804	2	13780059	13780559	AT2G32450	+	39	Yes	NA	3856	6	0.070444	600	-7.71089	1	1	0.070444	100	-0.420999	929	8	-6.70069	500	2
1	19298403	19298903	AT1G51940	+	381	1	19294006	19294506	AT1G51920	+	1695	Yes	Yes	4397	13	0.070444	1300	-23.655	2.2e-05	4	0.070444	400	-3.9747	302	1547	-7.0959	900	-8
3	277454	277954	AT3G01770	+	70	3	274037	274537	AT3G01760	+	1175	NA	Yes	3417	10	0.070444	1000	-16.5602	0.019884	3	0.070444	300	-2.54713	47	1185	-5.94984	700	6
1	10377953	10378453	AT1G29680	+	991	1	10375468	10375968	AT1G29670	+	1372	Yes	Yes	2485	55	0.071218	5440.21	-170.782	0	45	0.080625	3931.78	-131.038	1027	1518	-4.49539	1508.44	66
2	19318047	19318547	AT2G47010	+	63	2	19314518	19315018	AT2G47000	+	781	NA	Yes	3529	7	0.070444	700	-9.64875	1	4	0.070444	400	-4.00993	72	852	-1.55924	300	2
2	8986436	8986936	AT2G20880	+	1889	2	8970051	8970551	AT2G20830	+	81	Yes	NA	16385	8	0.070444	800	-11.7628	1	0	0	0	0	0	0	0	800	4
1	574527	575027	AT1G02660	+	622	1	562391	562891	AT1G02630	+	807	Yes	Yes	12136	6	0.070444	600	-7.44498	1	2	0.070444	200	-1.33089	612	968	-2.94966	400	2
1	7899131	7899631	AT1G22370	+	811	1	7890012	7890512	AT1G22340	+	77	Yes	NA	9119	6	0.070444	600	-7.56677	1	1	0.070444	100	-0.450752	1032	37	-5.79051	500	2
2	9696373	9696873	AT2G22790	+	130	2	9678574	9679074	AT2G22760	+	964	NA	Yes	17799	8	0.070444	800	-11.6567	1	4	0.070444	400	-3.98836	134	1119	-2.23026	400	4
1	26972016	26972516	AT1G71697	+	96	1	26967448	26967948	AT1G71696	+	674	NA	Yes	4568	7	0.070444	700	-9.55843	1	4	0.070444	400	-4.00687	77	719	-1.55776	300	2
2	16388429	16388929	AT2G39250	+	369	2	16383942	16384442	AT2G39230	+	75	Yes	NA	4487	6	0.070444	600	-7.57058	1	0	0.070444	0	1.00721	446	70	1.00721	600	2
3	2082593	2083093	AT3G06650	+	1202	3	2065988	2066488	AT3G06620	+	252	Yes	Yes	16605	7	0.070444	700	-9.45535	1	2	0.070444	200	-1.3309	1263	219	-4.13082	500	2
3	3076870	3077370	AT3G10000	+	1114	3	3062478	3062978	AT3G09960	+	938	Yes	Yes	14392	7	0.070444	700	-9.41018	1	3	0.070444	300	-2.52343	1265	786	-2.48252	400	2
1	19556465	19556965	AT1G52490	+	889	1	19554949	19555449	AT1G52470	+	60	Yes	Yes	1516	10	0.070444	1000	-16.6583	0.018226	2	0.070444	200	-1.33104	789	29	-9.2204	800	-6
1	21116981	21117481	AT1G56410	+	212	1	21095415	21095915	AT1G56350	+	1144	NA	Yes	21566	6	0.070444	600	-7.47757	1	4	0.070444	400	-3.9786	222	1105	-0.991128	200	2
1	26146679	26147179	AT1G69540	+	919	1	26128390	26128890	AT1G69520	+	63	Yes	NA	18289	6	0.070444	600	-7.59879	1	2	0.070444	200	-1.33091	961	95	-2.98117	400	2
1	29498538	29499038	AT1G78400	+	902	1	29487117	29487617	AT1G78380	+	1056	Yes	Yes	11421	8	0.070444	800	-11.5121	1	1	0.070444	100	-0.458361	927	1239	-9.41037	700	-4
3	1749332	1749832	AT3G05858	+	1858	3	1741545	1742045	AT3G05840	+	42	Yes	NA	7787	6	0.070444	600	-7.68942	1	0	0	0	0	0	0	0	600	2
2	269039	269539	AT2G01600	+	124	2	240086	240586	AT2G01530	+	1793	NA	Yes	28953	8	0.070444	800	-11.6651	1	0	0	0	0	0	0	0	800	4
1	25021615	25022115	AT1G67040	+	41	1	25012432	25012932	AT1G67020	+	1452	NA	Yes	9183	7	0.070444	700	-9.79584	1	2	0.070444	200	-1.33094	49	1445	-4.24284	500	2
1	29512519	29513019	AT1G78440	+	1636	1	29505421	29505921	AT1G78420	+	157	Yes	Yes	7098	9	0.070444	900	-13.8824	0.235183	1	0.070444	100	-0.456161	1861	116	-11.6776	800	-4
1	243133	243633	AT1G01670	+	462	1	242338	242838	AT1G01660	+	535	NA	Yes	795	8	0.070444	800	-11.5349	1	2	0.070444	200	-1.33089	407	530	-5.42249	600	4
3	379514	380014	AT3G02125	+	56	3	373424	373924	AT3G02110	+	799	NA	Yes	6090	7	0.070444	700	-9.68233	1	2	0.070444	200	-1.33092	70	855	-4.19819	500	2
2	12767132	12767632	AT2G29950	+	550	2	12766436	12766936	AT2G29940	+	114	Yes	Yes	696	6	0.070444	600	-7.52083	1	1	0.070444	100	-0.456415	314	129	-5.65985	500	2
2	10871079	10871579	AT2G25540	+	971	2	10861498	10861998	AT2G25520	+	105	Yes	NA	9581	11	0.070444	1100	-18.8663	0.002183	5	0.070444	500	-5.68102	1025	91	-3.58174	600	6
2	1008951	1009451	AT2G03330	+	1276	2	1005957	1006457	AT2G03310	+	592	Yes	Yes	2994	37	0.070444	3700	-101.393	0	14	0.070444	1400	-26.2888	1470	477	-14.7671	2300	-38
1	6303464	6303964	AT1G18310	+	135	1	6294437	6294937	AT1G18280	+	706	NA	Yes	9027	8	0.070444	800	-11.6503	1	1	0.070444	100	-0.456245	120	651	-9.52471	700	-4
2	7037994	7038494	AT2G16230	+	1331	2	7021399	7021899	AT2G16190	+	49	Yes	NA	16595	6	0.070444	600	-7.65012	1	4	0.070444	400	-4.02242	1183	57	-0.991346	200	2
3	79495	79995	AT3G01250	+	47	3	74411	74911	AT3G01220	+	944	NA	Yes	5084	9	0.070444	900	-14.3505	0.161928	6	0.070444	600	-7.71089	39	1143	-1.41177	300	4
2	17032951	17033451	AT2G40810	+	1006	2	17026514	17027014	AT2G40800	+	134	Yes	NA	6437	10	0.070444	1000	-16.2895	0.024693	6	0.070444	600	-7.51185	996	126	-1.91277	400	6
1	11395409	11395909	AT1G31790	+	81	1	11391797	11392297	AT1G31780	+	441	NA	Yes	3612	9	0.070444	900	-14.0638	0.207032	5	0.070444	500	-5.71353	63	409	-2.08267	400	4
2	1983920	1984420	AT2G05420	+	1356	2	1966914	1967414	AT2G05380	+	72	Yes	NA	17006	7	0.070444	700	-9.61557	1	4	0.070444	400	-4.00865	1226	74	-1.55862	300	2
2	17032524	17033024	AT2G40810	+	856	2	17027966	17028466	AT2G40802	+	97	Yes	Yes	4558	8	0.070444	800	-11.716	1	1	0.070444	100	-0.455667	979	97	-9.55668	700	-4
3	5597378	5597878	AT3G16470	+	130	3	5592923	5593423	AT3G16460	+	116	Yes	NA	4455	6	0.070444	600	-7.5192	1	3	0.070444	300	-2.53293	106	131	-1.70213	300	2
2	17033441	17033941	AT2G40810	+	357	2	17029887	17030387	AT2G40805	+	219	Yes	Yes	3554	6	0.070444	600	-7.47597	1	1	0.070444	100	-0.456919	451	166	-5.64867	500	2
2	5935909	5936409	AT2G14100	+	1187	2	5931951	5932451	AT2G14095	+	24	Yes	NA	3958	10	0.070444	1000	-17.8308	0.00575	2	0.070444	200	-1.3325	969	9	-11.2117	800	-6
2	14934516	14935016	AT2G35580	+	1779	2	14925446	14925946	AT2G35530	+	61	Yes	NA	9070	8	0.070444	800	-11.8577	1	3	0.070444	300	-2.55334	1908	38	-3.59503	500	4
1	4563947	4564447	AT1G13320	+	148	1	4562064	4562564	AT1G13310	+	379	NA	Yes	1883	7	0.070444	700	-9.49945	1	2	0.070444	200	-1.3309	189	385	-4.1357	500	2
2	6892482	6892982	AT2G15830	+	69	2	6879991	6880491	AT2G15790	+	1836	Yes	Yes	12491	7	0.070444	700	-9.62562	1	0	0	0	0	0	0	0	700	2
2	8678605	8679105	AT2G20100	+	884	2	8664491	8664991	AT2G20080	+	111	Yes	NA	14114	7	0.070444	700	-9.5356	1	5	0.070444	500	-5.66699	930	113	-0.957088	200	2
2	13414519	13415019	AT2G31500	+	117	2	13410395	13410895	AT2G31480	+	1490	NA	Yes	4124	11	0.070444	1100	-18.8184	0.002271	7	0.070444	700	-9.54692	103	1391	-1.81862	400	6
2	1697476	1697976	AT2G04840	+	616	2	1695499	1695999	AT2G04830	+	280	Yes	Yes	1977	19	0.070444	1900	-40.8505	0	11	0.070444	1100	-18.5854	587	272	-3.52981	800	16
1	9427005	9427505	AT1G27135	+	132	1	9426077	9426577	AT1G27130	+	1322	NA	Yes	928	36	0.070444	3600	-101.699	0	21	0.070444	2100	-48.2517	107	1405	-6.94799	1500	-40
2	15058954	15059454	AT2G35859	+	122	2	15053677	15054177	AT2G35840	+	1846	NA	Yes	5277	15	0.070444	1500	-29.6202	0	0	0	0	0	0	0	0	1500	10
1	26404456	26404956	AT1G70100	+	169	1	26396601	26397101	AT1G70080	+	848	NA	Yes	7855	6	0.070444	600	-7.49028	1	5	0.070444	500	-5.64395	189	946	-0.576499	100	2
1	23626485	23626985	AT1G63700	+	50	1	23618539	23619039	AT1G63690	+	1095	NA	Yes	7946	9	0.070444	900	-14.3083	0.168481	3	0.070444	300	-2.54	65	1324	-4.61035	600	4
1	27900019	27900519	AT1G74180	+	51	1	27877379	27877879	AT1G74140	+	1039	NA	Yes	22640	6	0.070444	600	-7.64097	1	3	0.070444	300	-2.54337	55	1103	-1.71528	300	2
1	982993	983493	AT1G03870	+	1482	1	957451	957951	AT1G03800	+	980	Yes	Yes	25542	9	0.076074	833.392	-13.7266	0.264624	4	0.097198	289.901	-3.96733	1968	955	-5.21868	543.491	4
1	28550999	28551499	AT1G76090	+	169	1	28543361	28543861	AT1G76060	+	783	NA	Yes	7638	14	0.070444	1400	-26.6013	1e-06	7	0.070444	700	-9.4861	169	972	-3.71826	700	10
1	26216444	26216944	AT1G69690	+	1584	1	26203534	26204034	AT1G69670	+	710	Yes	Yes	12910	8	0.070444	800	-11.5185	1	7	0.088638	556.32	-9.41097	1915	895	-1.60755	243.68	4
2	259573	260073	AT2G01570	+	52	2	240038	240538	AT2G01530	+	1793	NA	Yes	19535	7	0.070444	700	-9.70582	1	0	0	0	0	0	0	0	700	2
2	17235005	17235505	AT2G41360	+	851	2	17231963	17232463	AT2G41350	+	135	Yes	NA	3042	15	0.070444	1500	-29.5413	0	6	0.070444	600	-7.49341	771	161	-5.81588	900	10
2	9423599	9424099	AT2G22155	+	461	2	9418385	9418885	AT2G22140	+	626	Yes	Yes	5214	8	0.070444	800	-11.535	1	5	0.070444	500	-5.62356	477	560	-1.43952	300	4
1	900497	900997	AT1G03610	+	142	1	896928	897428	AT1G03590	+	419	NA	Yes	3569	6	0.070444	600	-7.50227	1	5	0.070444	500	-5.64085	208	424	-0.576887	100	2
1	18509025	18509525	AT1G49980	+	1253	1	18502998	18503498	AT1G49970	+	670	Yes	Yes	6027	12	0.070444	1200	-20.9909	0.000278	1	0.070444	100	-0.458253	1370	690	-18.4821	1100	-8
1	19298031	19298531	AT1G51940	+	371	1	19294958	19295458	AT1G51930	+	727	Yes	Yes	3073	19	0.070444	1900	-40.7101	0	8	0.070444	800	-11.5525	336	836	-6.58882	1100	16
2	9423905	9424405	AT2G22155	+	327	2	9420460	9420960	AT2G22145	+	579	Yes	Yes	3445	14	0.070444	1400	-26.3662	2e-06	8	0.070444	800	-11.5618	294	553	-2.79438	600	10
2	12619493	12619993	AT2G29430	+	1288	2	12614989	12615489	AT2G29400	+	218	Yes	NA	4504	19	0.070444	1900	-41.0156	0	14	0.070444	1400	-26.4608	1539	237	-1.79444	500	16
3	5774634	5775134	AT3G16910	+	772	3	5772509	5773009	AT3G16900	+	112	Yes	NA	2125	26	0.070444	2600	-65.155	0	13	0.070444	1300	-24.1103	754	110	-6.97454	1300	-24
1	12333008	12333508	AT1G33950	+	113	1	12308964	12309464	AT1G33890	+	1842	NA	Yes	24044	8	0.070444	800	-11.6828	1	3	0.070444	300	-2.53188	117	1919	-3.45585	500	4
1	17378557	17379057	AT1G47389	+	1830	1	17367583	17368083	AT1G47370	+	632	Yes	Yes	10974	9	0.070444	900	-13.7427	0.261578	5	0.070444	500	-5.62088	1725	598	-2.02122	400	4
1	642985	643485	AT1G02880	+	59	1	623884	624384	AT1G02820	+	1866	NA	Yes	19101	7	0.070444	700	-9.66691	1	0	0	0	0	0	0	0	700	2
1	24918545	24919045	AT1G66790	+	87	1	24906445	24906945	AT1G66770	+	1283	Yes	Yes	12100	6	0.070444	600	-7.55039	1	4	0.070444	400	-4.01502	65	1392	-0.991291	200	2
2	8986162	8986662	AT2G20880	+	1254	2	8974060	8974560	AT2G20840	+	109	Yes	NA	12102	10	0.070444	1000	-16.356	0.023462	2	0.070444	200	-1.3309	1260	133	-8.51401	800	-6
1	574082	574582	AT1G02660	+	667	1	567061	567561	AT1G02640	+	174	Yes	Yes	7021	9	0.070444	900	-13.864	0.238435	5	0.070444	500	-5.64821	599	168	-2.03871	400	4
1	19122062	19122562	AT1G51570	+	76	1	19113852	19114352	AT1G51538	+	1062	Yes	Yes	8210	6	0.070444	600	-7.56865	1	1	0.070444	100	-0.455603	95	930	-5.67797	500	2
1	22908487	22908987	AT1G61980	+	69	1	22899548	22900048	AT1G61950	+	888	NA	Yes	8939	6	0.070444	600	-7.58342	1	5	0.070444	500	-5.71888	60	784	-0.567087	100	2
1	3881911	3882411	AT1G11560	+	847	1	3879012	3879512	AT1G11545	+	1016	Yes	Yes	2899	25	0.070444	2500	-59.2943	0	9	0.070444	900	-13.735	761	1096	-10.7615	1600	-22
2	16627002	16627502	AT2G39840	+	92	2	16618454	16618954	AT2G39820	+	1485	NA	Yes	8548	10	0.070444	1000	-16.4227	0.02227	2	0.070444	200	-1.3309	109	1292	-8.55255	800	-6
2	16907010	16907510	AT2G40475	+	245	2	16903039	16903539	AT2G40470	+	596	NA	Yes	3971	11	0.070444	1100	-18.6044	0.002718	10	0.070444	1000	-16.1571	251	622	-0.607666	100	6
1	22650481	22650981	AT1G61390	+	168	1	22644549	22645049	AT1G61370	+	961	NA	Yes	5932	9	0.070444	900	-13.8701	0.23735	6	0.070444	600	-7.48364	189	689	-1.37133	300	4
3	2081981	2082481	AT3G06650	+	214	3	2073557	2074057	AT3G06630	+	1503	Yes	Yes	8424	14	0.070444	1400	-26.4981	1e-06	6	0.070444	600	-7.47511	223	1484	-4.83664	800	10
1	29498967	29499467	AT1G78400	+	1483	1	29491076	29491576	AT1G78390	+	219	Yes	Yes	7891	14	0.070444	1400	-26.4893	1e-06	7	0.070444	700	-9.45874	1719	239	-3.68598	700	10
1	26146974	26147474	AT1G69540	+	1591	1	26142084	26142584	AT1G69530	+	1410	Yes	Yes	4890	23	0.117504	1378.86	-52.7293	0	13	0.151652	603.867	-23.5242	2014	1456	-7.99609	774.991	-20
1	26764987	26765487	AT1G70985	+	56	1	26749120	26749620	AT1G70944	+	1618	NA	Yes	15867	8	0.070444	800	-11.8927	1	0	0.070444	0	1.01304	39	1776	1.01304	800	4
3	3077522	3078022	AT3G10000	+	593	3	3067459	3067959	AT3G09975	+	134	Yes	NA	10063	8	0.070444	800	-11.6516	1	3	0.070444	300	-2.53042	554	137	-3.44685	500	4
1	1586482	1586982	AT1G05410	+	474	1	1584463	1584963	AT1G05400	+	1756	Yes	Yes	2019	50	0.070444	5000	-152.035	0	29	0.070444	2900	-73.3438	348	1835	-8.37641	2100	-58
1	29512836	29513336	AT1G78440	+	639	1	29510041	29510541	AT1G78430	+	143	Yes	NA	2795	13	0.070444	1300	-23.9593	1.7e-05	3	0.070444	300	-2.53018	724	141	-9.82201	1000	-8
1	10388526	10389026	AT1G29710	+	42	1	10378369	10378869	AT1G29680	+	1373	NA	Yes	10157	6	0.070444	600	-7.68942	1	1	0.070444	100	-0.447365	26	1471	-5.87365	500	2
2	17995082	17995582	AT2G43300	+	92	2	17989620	17990120	AT2G43280	+	594	NA	Yes	5462	6	0.070444	600	-7.54357	1	0	0.070444	0	1.00857	59	673	1.00857	600	2
1	6303166	6303666	AT1G18310	+	99	1	6297480	6297980	AT1G18290	+	828	NA	Yes	5686	7	0.070444	700	-9.5533	1	5	0.070444	500	-5.67655	97	898	-0.957117	200	2
1	19896506	19897006	AT1G53330	+	941	1	19887036	19887536	AT1G53310	+	48	Yes	NA	9470	7	0.070444	700	-9.73347	1	4	0.070444	400	-4.02462	899	55	-1.56646	300	2
2	15490949	15491449	AT2G36900	+	241	2	15488992	15489492	AT2G36895	+	420	NA	Yes	1957	11	0.070444	1100	-18.6076	0.00271	3	0.070444	300	-2.5264	260	306	-6.89665	800	6
1	27536502	27537002	AT1G73220	+	74	1	27514438	27514938	AT1G73170	+	1301	NA	Yes	22064	6	0.070444	600	-7.57257	1	3	0.070444	300	-2.53945	67	1329	-1.71028	300	2
1	20692544	20693044	AT1G55420	+	532	1	20677501	20678001	AT1G55380	+	1273	NA	Yes	15043	7	0.070444	700	-9.42277	1	3	0.070444	300	-2.52418	520	1335	-2.4849	400	2
1	520694	521194	AT1G02510	+	1013	1	519868	520368	AT1G02500	+	313	Yes	Yes	826	11	0.070444	1100	-18.5629	0.002817	3	0.070444	300	-2.52607	1047	281	-6.89007	800	6
1	29943015	29943515	AT1G79580	+	1013	1	29926075	29926575	AT1G79550	+	82	Yes	NA	16940	7	0.070444	700	-9.58755	1	2	0.070444	200	-1.33091	1031	101	-4.16728	500	2
1	7906424	7906924	AT1G22400	+	1235	1	7895449	7895949	AT1G22360	+	180	Yes	NA	10975	8	0.070444	800	-11.6091	1	5	0.070444	500	-5.64055	1061	210	-1.44377	300	4
2	10899965	10900465	AT2G25605	+	119	2	10890995	10891495	AT2G25590	+	925	NA	Yes	8970	8	0.070444	800	-11.6727	1	3	0.070444	300	-2.53303	105	975	-3.46297	500	4
2	18500080	18500580	AT2G44850	+	109	2	18496055	18496555	AT2G44840	+	634	NA	Yes	4025	13	0.070444	1300	-24.1163	1.5e-05	5	0.070444	500	-5.67323	102	508	-5.45004	800	8
3	671981	672481	AT3G02980	+	1823	3	656502	657002	AT3G02930	+	84	Yes	NA	15479	8	0.070444	800	-11.7526	1	0	0	0	0	0	0	0	800	4
2	9450468	9450968	AT2G22230	+	66	2	9435944	9436444	AT2G22190	+	1572	NA	Yes	14524	6	0.070444	600	-7.59074	1	2	0.070444	200	-1.33092	64	1973	-2.99996	400	2
1	10898544	10899044	AT1G30720	+	111	1	10892929	10893429	AT1G30700	+	568	NA	Yes	5615	9	0.070444	900	-13.9615	0.222608	2	0.070444	200	-1.3309	109	582	-6.96432	700	-4
2	7727374	7727874	AT2G17780	+	1473	2	7714612	7715112	AT2G17760	+	40	Yes	NA	12762	7	0.070444	700	-9.80667	1	6	0.070444	600	-7.62858	1495	54	-0.572976	100	2
1	19712090	19712590	AT1G52930	+	330	1	19710514	19711014	AT1G52920	+	775	Yes	Yes	1576	16	0.070444	1600	-31.9367	0	2	0.070444	200	-1.3309	208	458	-19.7603	1400	-12
2	13111863	13112363	AT2G30770	+	1168	2	13091433	13091933	AT2G30720	+	48	Yes	NA	20430	6	0.070444	600	-7.65499	1	2	0.070444	200	-1.33095	1286	47	-3.02143	400	2
1	4274543	4275043	AT1G12550	+	925	1	4268009	4268509	AT1G12520	+	87	Yes	NA	6534	6	0.070444	600	-7.55039	1	2	0.070444	200	-1.33092	1065	74	-2.99211	400	2
1	30339634	30340134	AT1G80730	+	1390	1	30328013	30328513	AT1G80680	+	60	Yes	NA	11621	7	0.070444	700	-9.66213	1	3	0.070444	300	-2.54154	1534	60	-2.54187	400	2
1	983435	983935	AT1G03870	+	1049	1	958978	959478	AT1G03810	+	1371	Yes	Yes	24457	6	0.075332	561.073	-7.43818	1	2	0.096605	145.839	-1.33089	1322	1413	-5.07235	415.234	2
1	25412466	25412966	AT1G67780	+	36	1	25406117	25406617	AT1G67760	+	1724	NA	Yes	6349	6	0.070444	600	-7.73621	1	1	0.070444	100	-0.44818	28	1938	-5.85327	500	2
1	4130931	4131431	AT1G12180	+	1012	1	4117406	4117906	AT1G12120	+	120	Yes	NA	13525	7	0.070444	700	-9.52471	1	3	0.070444	300	-2.52938	1183	156	-2.50157	400	2
2	8246012	8246512	AT2G19020	+	390	2	8241085	8241585	AT2G19000	+	884	Yes	Yes	4927	12	0.070444	1200	-21.0514	0.000264	9	0.070444	900	-13.7756	367	762	-1.22921	300	8
1	17418032	17418532	AT1G47480	+	509	1	17414967	17415467	AT1G47470	+	81	Yes	NA	3065	6	0.070444	600	-7.55971	1	3	0.070444	300	-2.53448	378	93	-1.70406	300	2
2	17513007	17513507	AT2G41950	+	316	2	17511884	17512384	AT2G41945	+	525	NA	Yes	1123	18	0.070444	1800	-37.7824	0	11	0.070444	1100	-18.5309	407	399	-2.93036	700	14
1	2211997	2212497	AT1G07200	+	1240	1	2183579	2184079	AT1G07110	+	73	Yes	NA	28418	6	0.070444	600	-7.57462	1	1	0.070444	100	-0.454248	1181	66	-5.70869	500	2
2	10337518	10338018	AT2G24285	+	84	2	10316422	10316922	AT2G24255	+	704	NA	Yes	21096	7	0.070444	700	-9.58277	1	4	0.070444	400	-4.00419	82	672	-1.55647	300	2
2	12619484	12619984	AT2G29430	+	1288	2	12617037	12617537	AT2G29410	+	107	Yes	NA	2447	12	0.070444	1200	-21.4484	0.000187	9	0.070444	900	-13.9476	1539	117	-1.24096	300	8
1	27522542	27523042	AT1G73190	+	83	1	27513468	27513968	AT1G73170	+	993	NA	Yes	9074	12	0.070444	1200	-21.614	0.000161	2	0.070444	200	-1.33091	76	1010	-12.2149	1000	-8
2	8986387	8986887	AT2G20880	+	1889	2	8975020	8975520	AT2G20850	+	57	Yes	NA	11367	10	0.070444	1000	-16.695	0.017624	0	0	0	0	0	0	0	1000	6
3	6024941	6025441	AT3G17611	+	109	3	6020521	6021021	AT3G17600	+	343	NA	Yes	4420	8	0.070444	800	-11.6902	1	5	0.070444	500	-5.67023	107	225	-1.45138	300	4
2	10940097	10940597	AT2G25690	+	53	2	10937440	10937940	AT2G25685	+	325	NA	Yes	2657	8	0.070444	800	-11.9171	1	2	0.070444	200	-1.33095	47	199	-5.63972	600	4
1	20941466	20941966	AT1G55980	+	80	1	20937548	20938048	AT1G55970	+	887	NA	Yes	3918	6	0.070444	600	-7.56141	1	3	0.070444	300	-2.54	65	919	-1.71098	300	2
1	574080	574580	AT1G02660	+	667	1	569548	570048	AT1G02650	+	118	Yes	NA	4532	8	0.070444	800	-11.6743	1	3	0.070444	300	-2.53006	599	143	-3.44465	500	4
1	7899463	7899963	AT1G22370	+	1699	1	7895107	7895607	AT1G22360	+	85	Yes	NA	4356	9	0.070444	900	-14.0458	0.209809	2	0.070444	200	-1.33092	1581	74	-7.03852	700	-4
1	4693463	4693963	AT1G13690	+	1174	1	4681468	4681968	AT1G13650	+	293	Yes	Yes	11995	7	0.070444	700	-9.44665	1	4	0.070444	400	-3.97459	1383	305	-1.54256	300	2
2	16626985	16627485	AT2G39840	+	92	2	16622484	16622984	AT2G39830	+	530	NA	Yes	4501	6	0.070444	600	-7.54357	1	3	0.070444	300	-2.53262	109	497	-1.70175	300	2
1	25427043	25427543	AT1G67810	+	1077	1	25405923	25406423	AT1G67760	+	1724	Yes	Yes	21120	6	0.097256	434.59	-7.43792	1	3	0.117365	180.065	-2.52295	1171	1938	-3.10666	254.525	2
1	9850480	9850980	AT1G28200	+	57	1	9841472	9841972	AT1G28170	+	1243	NA	Yes	9008	12	0.070444	1200	-21.965	0.000116	3	0.070444	300	-2.5442	53	1298	-8.74948	900	-8
1	22651428	22651928	AT1G61390	+	38	1	22649120	22649620	AT1G61380	+	1478	NA	Yes	2308	8	0.070444	800	-12.1022	1	1	0.070444	100	-0.449784	33	1556	-9.90267	700	-4
2	13809510	13810010	AT2G32530	+	530	2	13797004	13797504	AT2G32500	+	951	Yes	Yes	12506	7	0.070444	700	-9.42287	1	6	0.070444	600	-7.44517	615	1223	-0.588592	100	2
1	20277440	20277940	AT1G54320	+	149	1	20271453	20271953	AT1G54300	+	517	NA	Yes	5987	6	0.070444	600	-7.49874	1	3	0.070444	300	-2.52876	170	491	-1.69701	300	2
3	2079450	2079950	AT3G06650	+	216	3	2077601	2078101	AT3G06640	+	1703	Yes	Yes	1849	34	0.070444	3400	-92.1439	0	20	0.070444	2000	-44.2625	183	1864	-5.88902	1400	36
1	25344978	25345478	AT1G67630	+	109	1	25341356	25341856	AT1G67620	+	951	NA	Yes	3622	10	0.070444	1000	-16.356	0.023462	1	0.070444	100	-0.455815	102	862	-13.9857	900	-6
2	18743470	18743970	AT2G45470	+	116	2	18718441	18718941	AT2G45420	+	1474	NA	Yes	25029	6	0.070444	600	-7.5192	1	4	0.070444	400	-3.99221	116	1702	-0.991168	200	2
3	3349992	3350492	AT3G10700	+	792	3	3335058	3335558	AT3G10670	+	63	Yes	NA	14934	6	0.070444	600	-7.59879	1	3	0.070444	300	-2.53821	794	72	-1.70872	300	2
1	17275470	17275970	AT1G46984	+	220	1	17270195	17270695	AT1G46840	+	1215	NA	Yes	5275	14	0.070444	1400	-26.4876	1e-06	5	0.070444	500	-5.64626	177	1044	-6.38062	900	10
1	25343993	25344493	AT1G67630	+	147	1	25342822	25343322	AT1G67623	+	533	NA	Yes	1171	11	0.070444	1100	-18.7338	0.002434	5	0.070444	500	-5.65557	141	587	-3.53192	600	6
1	24196366	24196866	AT1G65130	+	422	1	24193925	24194425	AT1G65120	+	180	NA	Yes	2441	13	0.070444	1300	-23.8577	1.8e-05	4	0.070444	400	-3.98147	371	186	-7.16019	900	-8
1	8240417	8240917	AT1G23210	+	1133	1	8227516	8228016	AT1G23200	+	59	Yes	NA	12901	8	0.070444	800	-11.871	1	1	0.070444	100	-0.45305	1273	52	-9.70582	700	-4
3	3364085	3364585	AT3G10740	+	108	3	3353554	3354054	AT3G10710	+	1188	NA	Yes	10531	6	0.070444	600	-7.52609	1	5	0.070444	500	-5.67387	101	1441	-0.572749	100	2
1	3905995	3906495	AT1G11608	+	75	1	3902537	3903037	AT1G11600	+	1686	NA	Yes	3458	14	0.070444	1400	-27.2472	1e-06	8	0.070444	800	-11.7067	101	1722	-2.8831	600	10
2	9809027	9809527	AT2G23040	+	167	2	9805990	9806490	AT2G23030	+	912	Yes	Yes	3037	16	0.070444	1600	-32.2659	0	12	0.070444	1200	-21.2365	173	1100	-1.50805	400	12
1	23186441	23186941	AT1G62630	+	649	1	23151950	23152450	AT1G62540	+	119	Yes	NA	34491	6	0.070444	600	-7.51686	1	1	0.070444	100	-0.456622	688	142	-5.65525	500	2
2	1076986	1077486	AT2G03550	+	641	2	1064937	1065437	AT2G03505	+	848	Yes	Yes	12049	9	0.070444	900	-13.7421	0.261707	4	0.070444	400	-3.96898	642	941	-2.98428	500	4
1	22462977	22463477	AT1G60990	+	55	1	22459480	22459980	AT1G60986	+	746	NA	Yes	3497	6	0.070444	600	-7.62477	1	1	0.070444	100	-0.449784	33	898	-5.81388	500	2
1	19065920	19066420	AT1G51420	+	1719	1	19053067	19053567	AT1G51402	+	99	Yes	NA	12853	13	0.070444	1300	-24.1842	1.4e-05	8	0.070444	800	-11.6921	1757	108	-2.26773	500	8
2	10714366	10714866	AT2G25170	+	842	2	10700540	10701040	AT2G25140	+	90	Yes	Yes	13826	6	0.070444	600	-7.5462	1	1	0.070444	100	-0.454379	815	68	-5.7057	500	2
1	3841835	3842335	AT1G11410	+	452	1	3837973	3838473	AT1G11400	+	105	Yes	NA	3862	10	0.070444	1000	-16.3697	0.023212	1	0.070444	100	-0.456094	406	113	-13.9567	900	-6
3	5684924	5685424	AT3G16690	+	457	3	5676571	5677071	AT3G16660	+	33	Yes	NA	8353	6	0.070444	600	-7.76652	1	1	0.070444	100	-0.450296	318	35	-5.80148	500	2
[truncated: 4,739 more rows]
