# Supplementary material for: Polycomb-dependent differential chromatin compartmentalization determines gene coregulation in Arabidopsis
Source: HighWire-hosted journal article supplement (doi:10.1101/gr.273771.120), 2021-06-03
Supplement: Supplemental_Table_S15.xlsx [file Supplemental_Table_S15.xlsx]

## Sheet: S15
Supplementary Table S15: ref6_vs_Col-0_Top2K loops
Peak_start(1)	Peak_end(1)	Gene1	Hyper_1	Gene1_Chr1	Gene1_Start	Gene1_End	H3K27me_level_COl0_1	H3K27me_level_ref6_1	Peak_start(1)	Peak_end(1)	Gene2	Hyper_2	Gene2_Chr	Gene2_Start	Gene2_End	H3K27me_level_COl0_2	H3K27me_level_ref6_2	Total Reads(1)	Peak_chr(2)	Peak_start(2)	Peak_end(2)	Peak_strand(2)	Total Reads(2)	InteractionID	Distance	Interaction Reads	Expected Reads	FDR(Benjamini, based on 2.84e+10 total tests)	Bg Interaction Reads	Bg Expected Reads	Bg Z-score	Bg LogP	Bg Total Reads Peak1	Bg Total Reads Peak2	LogP vs. Bg	Z-score Difference vs. Bg	Circos Thickness	RNA-seq_LFC_1	pval_1	RNA-seq_LFC_2	pval_2
3407519	3408019	AT1G10390	NA	1	3407023	3412843	0.793486	0.513037	3407519	3408019	AT1G10385	Yes	1	3403223	3405856	1.43369	4.59588	136	1	3403942	3404442	+	1263	interaction6437	3577	24	0.070445	0	3	0.070445	300	-2.53491	90	857	-31.5893	2100	-22	0.19457	0.136535	-0.69375	0.631936
1573929	1574429	AT2G04515	NA	2	1573636	1574478	0.726194	0.567729	1573929	1574429	AT2G04495	NA	2	1564165	1565106	1.41091	1.74822	164	2	1564591	1565091	+	1659	interaction60949	9338	26	0.070445	0	4	0.070445	400	-4.00054	90	1343	-29.8638	2200	-24	0.0273377	NA	0.536344	0.680535
9803024	9803524	AT1G28100	NA	1	9801081	9804394	0.770631	0.407604	9803024	9803524	AT1G28090	NA	1	9795761	9799063	0.650354	0.486906	126	1	9796153	9796653	+	1955	interaction19158	6871	30	0.070445	0	6	0.070445	600	-7.56315	79	2021	-28.9439	2400	-30	-0.171545	0.254543	0.0837065	0.601222
20758520	20759020	AT1G55570	NA	1	20757766	20760076	4.12921	6.37835	20758520	20759020	AT1G55560	Yes	1	20754320	20756656	1.98587	3.0068	1771	1	20755424	20755924	+	397	interaction35279	3096	40	0.070445	0	10	0.070445	1000	-16.1583	1250	249	-28.3353	3000	-44	1.5594	NA	NA	NA
6417472	6417972	AT1G18640	NA	1	6416356	6418690	0.759999	0.375913	6417472	6417972	AT1G18620	NA	1	6409977	6414451	0.680008	0.399996	72	1	6409967	6410467	+	1163	interaction12432	7505	16	0.070445	0	1	0.070445	100	-0.451865	43	1200	-28.2075	1500	-12	0.177493	0.227887	-0.275743	0.0263911
19113949	19114449	AT1G51538	Yes	1	19113182	19115273	0.628106	0.768283	19113949	19114449	AT1G51530	NA	1	19109853	19112157	0.686955	0.46518	1133	1	19111982	19112482	+	95	interaction30747	1967	19	0.070445	0	2	0.070445	200	-1.33091	930	77	-27.543	1700	-16	-0.718499	0.444149	-1.47582	0.209693
29301468	29301968	AT1G77930	Yes	1	29300999	29303570	1.57969	0.915901	29301468	29301968	AT1G77890	NA	1	29292122	29296160	0.638639	0.449247	1836	1	29295044	29295544	+	110	interaction56647	6424	15	0.070445	0	1	0.070445	100	-0.455358	1683	88	-27.0703	1400	-10	-0.606752	5.93e-08	0.114521	0.540689
21181932	21182432	AT1G56540	Yes	1	21181663	21185306	1.53385	5.3011	21181932	21182432	AT1G56520	Yes	1	21174663	21178974	1.21813	3.29238	817	1	21176605	21177105	+	271	interaction36315	5327	15	0.070445	0	1	0.070445	100	-0.457466	553	241	-26.4551	1400	-10	-1.46548	1.7e-08	-2.64047	3.33e-54
24359949	24360449	AT1G65510	NA	1	24359452	24360081	1.29463	0.785013	24359949	24360449	AT1G65500	NA	1	24357866	24358616	4.06162	5.59665	417	1	24357376	24357876	+	849	interaction44537	2573	15	0.070445	0	1	0.070445	100	-0.457751	315	751	-26.3757	1400	-10	0.0969639	0.797674	1.9056	1.94e-07
25169026	25169526	AT1G67260	NA	1	25167461	25169307	4.86628	8.83645	25169026	25169526	AT1G67238	NA	1	25158114	25158454	0.700816	0.290424	1334	1	25159020	25159520	+	75	interaction48082	10006	14	0.070445	1e-06	1	0.070445	100	-0.450296	950	35	-25.6974	1300	-10	-2.17687	NA	1.02884	NA
14857326	14857826	AT2G35270	NA	2	14857020	14857878	4.72036	7.73945	14857326	14857826	AT2G35260	NA	2	14849535	14851969	0.705661	0.493815	1334	2	14849492	14849992	+	95	interaction79022	7834	18	0.070445	0	2	0.070445	200	-1.33093	955	59	-25.6413	1600	-14	0.0475839	0.919085	-0.61776	6.94e-12
21193574	21194074	AT1G56560	NA	1	21192498	21195112	0.626042	0.408876	21193574	21194074	AT1G56550	Yes	1	21185661	21188369	1.57116	4.25881	121	1	21187055	21187555	+	2063	interaction36445	6519	18	0.070445	0	2	0.070445	200	-1.33091	80	1825	-25.0539	1600	-14	0.144088	0.335689	-0.298354	0.171866
441054	441554	AT1G02260	Yes	1	440440	442877	0.766433	1.45839	441054	441554	AT1G02230	Yes	1	435173	436776	0.67918	5.79655	83	1	435616	436116	+	1541	interaction766	5438	14	0.070445	1e-06	1	0.070445	100	-0.453961	62	1373	-24.6425	1300	-10	-0.547268	0.00301737	-1.99293	0.0027671
17831493	17831993	AT2G42850	Yes	2	17831654	17833432	0.757918	0.73674	17831493	17831993	AT2G42840	Yes	2	17826115	17827536	1.61946	3.3497	1142	2	17826006	17826506	+	152	interaction85356	5487	18	0.070445	0	2	0.070445	200	-1.3309	1080	113	-24.6024	1600	-14	-0.355725	0.43141	0.316392	0.15952
3869490	3869990	AT1G11490	Yes	1	3868883	3870065	0.901403	3.02882	3869490	3869990	AT1G11470	NA	1	3859661	3860604	4.49685	8.09133	1617	1	3860016	3860516	+	195	interaction7240	9474	18	0.070445	0	2	0.070445	200	-1.3309	1048	144	-24.3766	1600	-14	-0.565999	0.505816	0.747547	NA
18228472	18228972	AT1G49270	Yes	1	18227333	18230227	1.4463	2.18182	18228472	18228972	AT1G49260	Yes	1	18225869	18226967	3.89973	4.94147	242	1	18226363	18226863	+	2078	interaction29028	2109	40	0.070445	0	12	0.070445	1200	-21.3167	140	1467	-24.1961	2800	-44	0.747547	NA	NA	NA
5238989	5239489	AT1G15215	NA	1	5238064	5240051	0.692467	0.416743	5238989	5239489	AT1G15210	Yes	1	5231347	5236573	0.691572	0.890446	1974	1	5235527	5236027	+	100	interaction10679	3462	27	0.070445	0	6	0.070445	600	-7.63255	1468	53	-24.181	2100	-26	0.0110073	0.968606	-0.125241	0.508813
21101970	21102470	AT1G56380	NA	1	21101326	21102701	2.32238	4.19863	21101970	21102470	AT1G56345	NA	1	21092992	21094461	0.658304	0.415869	1404	1	21094106	21094606	+	111	interaction36006	7864	14	0.070445	1e-06	1	0.070445	100	-0.455786	1153	101	-24.1695	1300	-10	NA	NA	0.0247603	0.928391
26710521	26711021	AT1G70830	NA	1	26709946	26711462	4.08325	6.22055	26710521	26711021	AT1G70790	NA	1	26700411	26702346	0.722695	0.567302	1599	1	26701466	26701966	+	159	interaction51366	9055	14	0.070445	1e-06	1	0.070445	100	-0.455999	1353	109	-24.1163	1300	-10	-0.032709	0.888533	-0.375205	0.0975145
23797082	23797582	AT1G64110	Yes	1	23796718	23801725	0.740733	3.19645	23797082	23797582	AT1G64100	Yes	1	23791584	23795563	0.897846	2.10307	190	1	23791500	23792000	+	1148	interaction42629	5582	14	0.070445	2e-06	1	0.070445	100	-0.456071	112	1132	-24.0985	1300	-10	-2.73636	9.85e-30	-2.80449	1.1e-41
16233433	16233933	AT2G38860	NA	2	16233314	16235235	0.706456	0.382329	16233433	16233933	AT2G38840	NA	2	16227050	16232456	0.758521	0.398323	246	2	16227057	16227557	+	973	interaction81419	6376	18	0.070445	0	2	0.070445	200	-1.33089	243	1083	-24.0529	1600	-14	1.94159	1.34e-38	-0.0236643	0.888066
7430573	7431073	AT1G21230	Yes	1	7429979	7432346	0.50445	0.749503	7430573	7431073	AT1G21210	Yes	1	7424105	7427041	0.622947	1.02119	1611	1	7425385	7425885	+	108	interaction14178	5188	20	0.070445	0	3	0.070445	300	-2.5409	1008	62	-23.5666	1700	-16	-0.927011	NA	-0.123625	0.848586
27503468	27503968	AT1G73140	NA	1	27502132	27503819	0.713745	0.578202	27503468	27503968	AT1G73130	NA	1	27499034	27502055	0.637849	0.424714	344	1	27499868	27500368	+	769	interaction53138	3600	26	0.070445	0	5	0.070445	500	-5.63414	266	605	-23.3113	2100	-24	-0.484301	0.382304	-0.0390937	0.896641
16845451	16845951	AT2G40330	NA	2	16844863	16845934	2.98834	3.42851	16845451	16845951	AT2G40320	Yes	2	16840146	16842282	0.664848	0.911385	144	2	16840861	16841361	+	1803	interaction82571	4590	17	0.070445	0	2	0.070445	200	-1.3309	123	1509	-22.246	1500	-12	1.06301	0.151605	-0.410196	0.0380839
27580566	27581066	AT1G73360	NA	1	27578695	27582521	0.613705	0.593838	27580566	27581066	AT1G73340	Yes	1	27573115	27575419	0.761635	0.853675	86	1	27573545	27574045	+	1846	interaction53501	7021	13	0.070445	1.4e-05	1	0.070445	100	-0.452703	49	1319	-22.1561	1200	-8	-0.311124	0.323963	-0.806954	0.0950837
960430	960930	AT1G03820	Yes	1	959868	960728	1.66243	2.87669	960430	960930	AT1G03810	Yes	1	958758	959609	2.44827	4.4504	1545	1	958576	959076	+	964	interaction2106	1854	60	0.072451	0	23	0.070445	2300	-52.9166	1271	665	-22.07	3533.82	-74	-0.610324	5.48e-05	1.25102	NA
26223957	26224457	AT1G69710	Yes	1	26222071	26226652	0.56712	0.555276	26223957	26224457	AT1G69660	NA	1	26199622	26200603	2.37696	2.75999	132	1	26199928	26200428	+	1728	interaction50491	24029	13	0.070445	1.8e-05	1	0.070445	100	-0.453156	53	1333	-22.0526	1200	-8	0.377327	0.560926	0.760588	NA
10350518	10351018	AT1G29630	NA	1	10349426	10353736	0.669471	0.393356	10350518	10351018	AT1G29590	NA	1	10339936	10342848	0.74978	0.50201	85	1	10340516	10341016	+	1738	interaction20733	10002	13	0.070445	1.3e-05	1	0.070445	100	-0.453803	60	1647	-21.9076	1200	-8	-0.116004	0.576924	0.187315	0.507287
23537058	23537558	AT1G63470	NA	1	23536518	23539220	0.822979	0.4037	23537058	23537558	AT1G63450	Yes	1	23531408	23534569	1.98232	2.35175	84	1	23531991	23532491	+	1718	interaction42089	5067	13	0.070445	1.3e-05	1	0.070445	100	-0.453883	61	1496	-21.8899	1200	-8	-0.236366	0.241252	-0.151993	0.774004
14676828	14677328	AT2G34790	NA	2	14673839	14677270	1.74592	1.83194	14676828	14677328	AT2G34780	NA	2	14668439	14673904	0.775538	0.482434	1271	2	14669037	14669537	+	91	interaction78550	7791	13	0.070445	1.4e-05	1	0.070445	100	-0.453961	939	62	-21.8727	1200	-8	0.599093	0.128854	-0.0422226	0.855339
9388657	9389157	AT1G27040	Yes	1	9386783	9390042	2.72729	4.9404	9388657	9389157	AT1G27030	NA	1	9381802	9383984	2.02672	2.18823	622	1	9381999	9382499	+	101	interaction18351	6658	13	0.070445	1.5e-05	1	0.070445	100	-0.454618	419	72	-21.7294	1200	-8	0.421269	0.811796	0.238819	0.116811
15843006	15843506	AT2G37800	NA	2	15841038	15843610	2.01587	3.04133	15843006	15843506	AT2G37770	Yes	2	15834866	15837001	0.82981	4.45507	128	2	15834640	15835140	+	744	interaction81059	8366	13	0.070445	1.7e-05	1	0.070445	100	-0.455071	81	629	-21.6325	1200	-8	-2.48856	NA	-3.02912	8.92e-31
1064435	1064935	AT2G03505	Yes	2	1064235	1065372	0.824789	3.11773	1064435	1064935	AT2G03500	NA	2	1059709	1062410	4.79123	7.68567	1578	2	1062075	1062575	+	105	interaction60137	2360	30	0.070445	0	8	0.070445	800	-11.7431	1394	87	-21.6136	2200	-30	-0.0398169	0.945329	0.0828518	0.760868
22509033	22509533	AT1G61100	NA	1	22508537	22512333	0.600794	0.41036	22509033	22509533	AT1G61095	Yes	1	22504513	22505511	1.50612	4.61651	154	1	22504410	22504910	+	723	interaction39627	4623	13	0.070445	1.9e-05	1	0.070445	100	-0.455468	91	682	-21.5486	1200	-8	0.645181	0.0259342	NA	NA
22140000	22140500	AT1G60060	NA	1	22139183	22141790	2.50373	2.70933	22140000	22140500	AT1G60050	Yes	1	22121549	22123702	3.30107	4.80111	364	1	22123457	22123957	+	1710	interaction38737	16543	13	0.070445	2.4e-05	1	0.070445	100	-0.457801	333	1392	-21.0763	1200	-8	1.09332	3.89e-09	0.00750858	0.995384
6186981	6187481	AT1G17970	NA	1	6184903	6187472	0.782618	0.406079	6186981	6187481	AT1G17950	NA	1	6177616	6179289	4.06146	7.41943	60	1	6177996	6178496	+	1991	interaction12078	8985	18	0.070445	0	3	0.070445	300	-2.55614	35	1537	-21.0445	1500	-14	-0.253527	0.0611637	-0.36791	0.393325
19545956	19546456	AT1G52450	NA	1	19541683	19546266	0.651723	0.501772	19545956	19546456	AT1G52440	NA	1	19538820	19540907	1.89055	2.29655	136	1	19538878	19539378	+	1617	interaction32202	7078	24	0.070445	0	5	0.070445	500	-5.6714	105	1428	-21.008	1900	-22	0.297738	0.425519	0.747547	NA
10302521	10303021	AT1G29430	NA	1	10302649	10303335	0.668439	0.466954	10302521	10303021	AT1G29410	NA	1	10297876	10300005	0.689243	0.358848	1007	1	10299071	10299571	+	76	interaction20581	3450	16	0.070445	0	2	0.070445	200	-1.33093	991	55	-20.9887	1400	-12	0.866484	1.79e-07	-0.0619083	0.812382
3883029	3883529	AT1G11570	NA	1	3883279	3883956	1.1975	0.458841	3883029	3883529	AT1G11490	Yes	1	3868883	3870065	0.901403	3.02882	844	1	3869443	3869943	+	1617	interaction7395	13586	13	0.070445	2.6e-05	1	0.070445	100	-0.458331	847	1048	-20.9734	1200	-8	-0.21474	0.693593	-0.565999	0.505816
20633503	20634003	AT1G55320	NA	1	20633359	20636892	0.645376	0.395367	20633503	20634003	AT1G55290	NA	1	20626120	20627488	0.722039	0.844029	1481	1	20626924	20627424	+	96	interaction35004	6579	16	0.070445	0	2	0.070445	200	-1.33092	1304	62	-20.7846	1400	-12	-0.422953	0.0553538	-0.588803	0.460136
26872581	26873081	AT1G71290	Yes	1	26872642	26873242	1.79183	2.51697	26872581	26873081	AT1G71270	NA	1	26863586	26870015	0.768289	0.44814	1555	1	26869007	26869507	+	169	interaction52026	3574	28	0.070445	0	7	0.070445	700	-9.5343	1351	112	-20.6957	2100	-26	NA	NA	0.0821751	0.557324
24205017	24205517	AT1G65150	Yes	1	24203840	24205775	1.5402	4.09956	24205017	24205517	AT1G65130	Yes	1	24196471	24201022	0.734327	0.602405	1073	1	24200035	24200535	+	221	interaction43805	4982	24	0.070445	0	5	0.070445	500	-5.65833	907	133	-20.6293	1900	-22	-1.07517	1.63e-07	0.200413	0.801639
22789154	22789654	AT1G61710	Yes	1	22788858	22790576	1.87302	3.19583	22789154	22789654	AT1G61700	Yes	1	22787011	22788333	1.62828	2.82452	961	1	22787978	22788478	+	623	interaction40434	1176	33	0.070445	0	9	0.070445	900	-13.7473	767	574	-20.3932	2400	-34	-0.523725	0.610734	NA	NA
22502483	22502983	AT1G61093	Yes	1	22501884	22502941	1.60724	4.62269	22502483	22502983	AT1G61090	Yes	1	22499316	22500331	1.3809	4.08671	828	1	22500076	22500576	+	1708	interaction39539	2407	54	0.070445	0	21	0.070445	2100	-46.6447	620	1115	-20.3445	3300	-64	-1.17601	NA	NA	NA
20463475	20463975	AT1G54890	NA	1	20463082	20464470	3.68548	4.96888	20463475	20463975	AT1G54830	NA	1	20451082	20452671	0.732841	0.334635	128	1	20451602	20452102	+	1540	interaction34821	11873	16	0.070445	0	2	0.070445	200	-1.33091	95	1492	-20.2577	1400	-12	1.26802	0.000820001	-0.0315596	0.874605
3841824	3842324	AT1G11410	NA	1	3841285	3844432	0.560334	0.395468	3841824	3842324	AT1G11400	NA	1	3837820	3840207	0.68714	0.356545	593	1	3839067	3839567	+	178	interaction7159	2757	19	0.070445	0	3	0.070445	300	-2.53012	406	142	-20.2426	1600	-16	-1.03361	1.23e-08	0.390115	0.00123556
10122400	10122900	AT1G29020	Yes	1	10120496	10122902	0.864166	1.48493	10122400	10122900	AT1G29010	NA	1	10117714	10119085	1.97485	2.87776	748	1	10118446	10118946	+	125	interaction19908	3954	16	0.070445	0	2	0.070445	200	-1.3309	602	103	-20.1842	1400	-12	-0.675312	0.179415	NA	NA
24513463	24513963	AT1G65890	NA	1	24512456	24514659	2.85175	5.34727	24513463	24513963	AT1G65880	NA	1	24508632	24510742	2.48374	3.05324	1629	1	24508943	24509443	+	121	interaction45377	4520	23	0.070445	0	5	0.070445	500	-5.69205	1235	79	-19.842	1800	-20	-2.10819	0.00519371	-0.522727	0.767398
27513192	27513692	AT1G73170	NA	1	27511660	27514797	0.835604	0.422416	27513192	27513692	AT1G73160	Yes	1	27506533	27507994	0.586875	2.44715	825	1	27506931	27507431	+	322	interaction53270	6261	16	0.070445	0	2	0.070445	200	-1.33089	735	244	-19.7012	1400	-12	-0.553441	0.000201387	0.997639	0.0371025
9633910	9634410	AT1G27680	NA	1	9631284	9634597	0.67814	0.451702	9633910	9634410	AT1G27670	NA	1	9627571	9628496	3.17493	3.43155	160	1	9628001	9628501	+	1224	interaction18803	5909	29	0.070445	0	8	0.070445	800	-11.7067	101	1108	-19.5865	2100	-28	-0.176637	0.300816	0.814687	0.000453785
7671948	7672448	AT2G17650	NA	2	7671015	7673036	0.577412	0.455835	7671948	7672448	AT2G17640	NA	2	7668077	7670495	0.760594	0.520186	128	2	7669446	7669946	+	1092	interaction64036	2502	23	0.070445	0	5	0.070445	500	-5.68182	90	954	-19.5612	1800	-20	-0.289785	0.274887	-0.249664	0.113434
9806016	9806516	AT2G23030	NA	2	9803491	9806700	1.6603	0.985951	9806016	9806516	AT2G23010	NA	2	9798842	9802674	1.57077	1.583	1037	2	9798988	9799488	+	83	interaction67930	7028	12	0.070445	0.000175	1	0.070445	100	-0.45418	1100	65	-19.1629	1100	-8	0.698966	1.07e-07	-0.164203	0.520878
1622587	1623087	AT1G05490	NA	1	1618601	1623452	0.604294	0.456413	1622587	1623087	AT1G05470	NA	1	1607356	1611703	0.723439	0.444489	1272	1	1608044	1608544	+	87	interaction3253	14543	12	0.070445	0.00018	1	0.070445	100	-0.454618	862	72	-19.0857	1100	-8	-0.711736	0.0426352	-0.607206	0.00245795
9999983	10000483	AT1G28440	NA	1	9996823	10000447	0.676983	0.427926	9999983	10000483	AT1G28430	NA	1	9992985	9994642	2.30511	3.04876	92	1	9993472	9993972	+	663	interaction19630	6511	12	0.070445	0.000186	1	0.070445	100	-0.454674	73	648	-19.076	1100	-8	0.09225	0.726736	0.257875	0.874598
9904520	9905020	AT2G23290	NA	2	9904786	9905920	0.716858	0.530174	9904520	9905020	AT2G23240	Yes	2	9895854	9896325	2.13204	4.71818	103	2	9895625	9896125	+	809	interaction68071	8895	12	0.070445	0.000198	1	0.070445	100	-0.454728	74	743	-19.0665	1100	-8	-0.174994	0.383847	-0.882732	NA
5527	6027	AT2G01020	Yes	2	5781	5945	97.5722	73.4709	5527	6027	AT5G10340	Yes	5	3253121	3255045	5.52188	4.23937	2064	5	3252963	3253463	+	1057	interaction58868	interchromosomal	31	0.106127	0	14	0.167542	588.643	-26.1667	1781	1819	-19.0195	1469.07	-30	0.52149	0.078789	0.0341548	NA
8077104	8077604	AT2G18610	NA	2	8076347	8077314	0.87337	0.761622	8077104	8077604	AT2G18600	Yes	2	8073199	8074982	2.10237	4.57992	153	2	8073604	8074104	+	833	interaction65312	3500	12	0.070445	0.000231	1	0.070445	100	-0.455241	85	744	-18.9778	1100	-8	NA	NA	-0.988014	0.00111551
7404451	7404951	AT1G21140	NA	1	7404382	7405281	4.37168	7.77021	7404451	7404951	AT1G21130	NA	1	7399061	7400605	1.00493	0.869756	191	1	7399627	7400127	+	1548	interaction14108	4824	23	0.070445	0	5	0.070445	500	-5.6587	132	1445	-18.9588	1800	-20	-0.150147	0.834366	0.753882	0.00013956
8071336	8071836	AT2G18590	Yes	2	8069944	8072866	1.81049	2.26716	8071336	8071836	AT2G18560	NA	2	8059287	8061056	0.865931	0.578924	721	2	8060510	8061010	+	117	interaction65241	10826	12	0.070445	0.00021	1	0.070445	100	-0.455757	468	100	-18.8898	1100	-8	-2.23485	NA	-0.58493	4.6e-05
9156987	9157487	AT1G26480	Yes	1	9156328	9157950	0.84234	0.677635	9156987	9157487	AT1G26460	NA	1	9151731	9154740	0.79838	0.373409	794	1	9151976	9152476	+	129	interaction17955	5011	12	0.070445	0.000218	1	0.070445	100	-0.455949	544	107	-18.8575	1100	-8	NA	NA	0.267292	0.0915586
29616371	29616871	AT1G78760	Yes	1	29615173	29616738	2.26839	3.32655	29616371	29616871	AT1G78750	Yes	1	29613121	29614695	2.01767	3.02586	622	1	29613510	29614010	+	301	interaction57614	2861	21	0.070445	0	4	0.070445	400	-3.97466	632	303	-18.815	1700	-18	-0.705317	0.6756	1.03214	0.0105526
13940293	13940793	AT2G32860	NA	2	13940186	13943804	2.78122	3.54832	13940293	13940793	AT2G32850	NA	2	13935185	13938845	0.785964	0.418574	1317	2	13936010	13936510	+	170	interaction76934	4283	12	0.070445	0.000239	1	0.070445	100	-0.456203	1023	118	-18.8148	1100	-8	-0.00418939	0.989199	0.31466	0.019638
8871540	8872040	AT1G25300	NA	1	8871567	8872386	3.44533	6.64331	8871540	8872040	AT1G25275	NA	1	8860670	8861364	0.620481	0.28136	137	1	8860588	8861088	+	1236	interaction17449	10952	12	0.070445	0.000223	1	0.070445	100	-0.456285	122	1512	-18.8013	1100	-8	NA	NA	1.25847	1.06e-08
19756931	19757431	AT1G53025	Yes	1	19756823	19759623	0.736094	0.906853	19756931	19757431	AT1G53023	Yes	1	19754213	19755843	1.66961	5.615	178	1	19754545	19755045	+	1422	interaction32672	2386	27	0.070445	0	7	0.070445	700	-9.50985	135	1108	-18.8008	2000	-26	-0.341647	0.0602024	NA	NA
20285991	20286491	AT1G54340	NA	1	20283479	20286786	0.638452	0.533765	20285991	20286491	AT1G54330	NA	1	20279566	20280952	4.73371	7.45773	175	1	20280482	20280982	+	1283	interaction34083	5509	12	0.070445	0.000241	1	0.070445	100	-0.456531	136	1255	-18.7603	1100	-8	0.179032	0.100946	-0.552433	0.528216
24574140	24574640	AT1G66000	NA	1	24574343	24575438	4.70359	6.46367	24574140	24574640	AT1G65990	NA	1	24571602	24573471	2.50548	5.72637	557	1	24571473	24571973	+	193	interaction45527	2667	12	0.070445	0.000247	1	0.070445	100	-0.456807	485	156	-18.715	1100	-8	-2.20509	NA	0.747547	NA
22001451	22001951	AT1G59790	NA	1	22001503	22003385	3.83103	5.68445	22001451	22001951	AT1G59780	Yes	1	21993580	21997691	1.47535	1.43541	1308	1	21996956	21997456	+	208	interaction38203	4495	12	0.070445	0.000252	1	0.070445	100	-0.457	1196	174	-18.6833	1100	-8	3.29876	0.032742	0.254905	0.521263
24723995	24724495	AT1G66310	NA	1	24722970	24724475	3.09017	3.58186	24723995	24724495	AT1G66300	NA	1	24716496	24718050	3.52434	4.70032	2070	1	24716500	24717000	+	260	interaction46382	7495	12	0.070445	0.000264	1	0.070445	100	-0.457133	1659	189	-18.6616	1100	-8	3.97523	NA	1.15559	0.327908
1994088	1994588	AT2G05440	NA	2	1993081	1994166	3.51958	6.43904	1994088	1994588	AT2G05430	NA	2	1985993	1987266	2.99671	3.3771	212	2	1987094	1987594	+	629	interaction61487	6994	12	0.070445	0.000253	1	0.070445	100	-0.457414	231	569	-18.6161	1100	-8	-0.122365	0.463016	1.07406	NA
11014529	11015029	AT1G30930	NA	1	11014782	11015913	3.37397	5.3959	11014529	11015029	AT1G30910	Yes	1	11000882	11002936	0.680031	0.484624	262	1	11001446	11001946	+	1382	interaction21928	13083	12	0.070445	0.000264	1	0.070445	100	-0.45743	234	1183	-18.6135	1100	-8	NA	NA	-0.0547259	0.702401
10035458	10035958	AT2G23590	NA	2	10034606	10036000	1.39559	1.40507	10035458	10035958	AT2G23540	Yes	2	10024345	10026233	2.01722	2.86118	1626	2	10024607	10025107	+	533	interaction68169	10851	12	0.070445	0.000291	1	0.070445	100	-0.457947	1478	400	-18.5306	1100	-8	0.820018	0.0558122	-0.942496	3e-05
12323492	12323992	AT1G33930	NA	1	12323887	12327084	1.79989	2.16318	12323492	12323992	AT1G33910	NA	1	12314903	12316258	1.51674	1.27915	775	1	12315472	12315972	+	952	interaction24532	8020	12	0.070445	0.000299	1	0.070445	100	-0.458194	669	605	-18.4915	1100	-8	-0.864643	0.00190887	0.0240888	NA
24292498	24292998	AT1G65390	NA	1	24292477	24294631	1.7802	2.33426	24292498	24292998	AT1G65352	NA	1	24277771	24278298	1.56347	1.67072	763	1	24277972	24278472	+	1721	interaction44305	14526	12	0.070445	0.000299	1	0.070445	100	-0.458279	734	1505	-18.4781	1100	-8	2.30419	0.0593169	NA	NA
12601017	12601517	AT2G29350	Yes	2	12600913	12602556	1.30763	2.90979	12601017	12601517	AT2G29320	NA	2	12592147	12593686	1.19186	1.15682	102	2	12592453	12592953	+	1426	interaction72995	8564	15	0.070445	0	2	0.070445	200	-1.33092	69	1553	-18.4046	1300	-10	2.03982	0.057165	-1.02976	9.47e-06
9228474	9228974	AT1G26700	NA	1	9228234	9232240	1.52349	1.97892	9228474	9228974	AT1G26690	NA	1	9224144	9225775	0.745962	0.534056	126	1	9224994	9225494	+	2006	interaction18194	3480	26	0.070445	0	7	0.070445	700	-9.59257	80	2031	-18.3737	1900	-24	0.654959	0.458274	0.163371	0.288484
15049046	15049546	AT2G35810	NA	2	15049149	15050323	1.04926	1.00987	15049046	15049546	AT2G35800	NA	2	15044044	15048603	0.814547	0.423602	1621	2	15045521	15046021	+	98	interaction79409	3525	15	0.070445	0	2	0.070445	200	-1.33091	1645	80	-18.2471	1300	-10	0.0626526	0.789832	-0.545973	0.000579248
26272425	26272925	AT1G69795	NA	1	26272775	26272870	2.53561	2.52506	26272425	26272925	AT1G69790	Yes	1	26266608	26269013	1.13408	1.7237	129	1	26267019	26267519	+	882	interaction50534	5406	20	0.070445	0	4	0.070445	400	-4.00274	85	877	-18.182	1600	-16	NA	NA	-0.666182	0.0130089
10876952	10877452	AT1G30660	NA	1	10876852	10879017	0.727457	1.04381	10876952	10877452	AT1G30650	NA	1	10868302	10871297	3.76723	5.10392	1177	1	10868600	10869100	+	954	interaction21677	8352	23	0.070445	0	5	0.070445	500	-5.61993	1051	657	-18.0352	1800	-20	0.102133	0.916303	0.196967	0.439757
4834495	4834995	AT1G14120	NA	1	4833517	4835089	2.58384	4.50192	4834495	4834995	AT1G14110	Yes	1	4830296	4831915	4.0565	6.83673	203	1	4830024	4830524	+	2008	interaction9818	4471	43	0.070445	0	17	0.070445	1700	-35.3553	139	1563	-17.9833	2600	-50	0.586735	0.0810352	NA	NA
18024684	18025184	AT1G48740	Yes	1	18023386	18026065	0.96912	1.0172	18024684	18025184	AT1G48730	Yes	1	18020336	18022277	1.82566	4.3224	1096	1	18019993	18020493	+	161	interaction28317	4691	22	0.070445	0	5	0.070445	500	-5.68614	871	85	-17.9613	1700	-18	-0.54029	0.381272	NA	NA
24790928	24791428	AT1G66460	Yes	1	24789734	24791988	0.985783	2.03271	24790928	24791428	AT1G66430	NA	1	24778270	24780629	0.698499	0.461452	2081	1	24779523	24780023	+	161	interaction46627	11405	15	0.070445	0	2	0.070445	200	-1.3309	1590	115	-17.9577	1300	-10	-0.980949	0.0128286	-0.1306	0.47225
21716587	21717087	AT1G58440	NA	1	21713841	21717290	0.650639	0.414833	21716587	21717087	AT1G58410	NA	1	21701184	21704255	1.953	1.98109	1746	1	21701922	21702422	+	186	interaction37469	14665	15	0.070445	0	2	0.070445	200	-1.3309	1544	120	-17.9309	1300	-10	0.317639	0.0505904	0.504649	0.0176129
19031986	19032486	AT1G51340	NA	1	19031996	19034979	0.786818	0.941743	19031986	19032486	AT1G51320	NA	1	19025641	19026769	1.25242	0.792199	207	1	19026354	19026854	+	1534	interaction30590	5632	20	0.070445	0	4	0.070445	400	-3.98818	135	1240	-17.6257	1600	-16	-0.811753	0.00214807	NA	NA
6481982	6482482	AT1G18800	Yes	1	6481112	6483596	0.607556	1.16364	6481982	6482482	AT1G18790	Yes	1	6478850	6480043	1.69212	4.06606	161	1	6479315	6479815	+	621	interaction12490	2667	24	0.070445	0	6	0.070445	600	-7.52609	108	528	-17.5491	1800	-22	-0.0563415	0.708972	NA	NA
26829849	26830349	AT1G71160	Yes	1	26828700	26830208	2.09727	4.351	26829849	26830349	AT1G71140	Yes	1	26824676	26826748	0.961426	1.95106	934	1	26824916	26825416	+	74	interaction51963	4933	11	0.070445	0.001969	1	0.070445	100	-0.450048	885	34	-17.2206	1000	-6	NA	NA	-0.65292	0.00202062
339575	340075	AT2G01780	Yes	2	338023	339871	1.47617	2.64449	339575	340075	AT2G01750	Yes	2	328088	332113	0.683619	0.429744	1214	2	329992	330492	+	65	interaction59322	9583	11	0.070445	0.001803	1	0.070445	100	-0.451351	853	40	-17.0185	1000	-6	NA	NA	0.242378	0.212521
3845999	3846499	AT1G11420	NA	1	3844580	3846872	0.589878	0.51311	3845999	3846499	AT1G11410	NA	1	3841285	3844432	0.560334	0.395468	162	1	3841549	3842049	+	1216	interaction7182	4450	27	0.070445	0	8	0.070445	800	-11.7343	90	921	-16.906	1900	-26	0.208405	0.370589	-1.03361	1.23e-08
22689362	22689862	AT1G61500	NA	1	22689728	22692881	0.650918	0.381029	22689362	22689862	AT1G61490	NA	1	22685153	22688267	0.600333	0.431371	1932	1	22686450	22686950	+	183	interaction39967	2912	29	0.070445	0	9	0.070445	900	-13.9591	1987	112	-16.8083	2000	-28	0.0250261	0.929284	0.264057	0.316509
7749619	7750119	AT1G22010	NA	1	7749570	7750062	4.7424	8.66987	7749619	7750119	AT1G21990	NA	1	7740529	7742106	4.11884	6.74062	1072	1	7740997	7741497	+	59	interaction14908	8622	11	0.070445	0.001669	1	0.070445	100	-0.452939	966	51	-16.7824	1000	-6	NA	NA	2.53413	NA
11240675	11241175	AT1G31380	NA	1	11240450	11241099	1.50958	0.906521	11240675	11241175	AT1G31360	NA	1	11232332	11237530	0.724503	0.436152	1547	1	11237092	11237592	+	123	interaction22252	3583	27	0.070445	0	8	0.070445	800	-11.7209	1073	95	-16.7789	1900	-26	NA	NA	0.0593696	0.775002
11501083	11501583	AT2G26950	Yes	2	11500720	11502136	1.28757	1.34641	11501083	11501583	AT2G26940	NA	2	11496517	11497378	2.44173	1.90535	88	2	11496813	11497313	+	997	interaction70445	4270	11	0.070445	0.002164	1	0.070445	100	-0.453454	56	705	-16.7082	1000	-6	1.48443	NA	1.12447	NA
5586467	5586967	AT1G16330	NA	1	5582386	5587391	0.691648	0.475294	5586467	5586967	AT1G16300	NA	1	5574309	5577622	0.684486	0.449498	101	1	5574915	5575415	+	1847	interaction11421	11552	11	0.070445	0.002297	1	0.070445	100	-0.453546	57	1501	-16.695	1000	-6	-0.234978	0.433169	0.0759746	0.75042
19263515	19264015	AT1G51870	Yes	1	19262878	19267001	2.58914	4.84401	19263515	19264015	AT1G51850	Yes	1	19252846	19256783	1.93326	2.87204	88	1	19256502	19257002	+	1439	interaction31303	7013	11	0.070445	0.002164	1	0.070445	100	-0.45372	59	1313	-16.6701	1000	-6	-1.2138	0.0973967	0.78237	1.91e-05
18479035	18479535	AT1G49910	NA	1	18479024	18481475	0.715863	0.452328	18479035	18479535	AT1G49890	NA	1	18470074	18473823	0.779397	0.448939	1766	1	18470526	18471026	+	95	interaction29227	8509	19	0.070445	0	4	0.070445	400	-4.00993	1754	72	-16.6701	1500	-16	-0.382057	0.176903	-0.011947	0.953706
17760492	17760992	AT1G48095	NA	1	17760141	17761998	1.02523	0.558509	17760492	17760992	AT1G48090	NA	1	17732009	17758444	0.868782	0.517078	1617	1	17757993	17758493	+	76	interaction27930	2499	23	0.070445	0	6	0.070445	600	-7.56677	1076	77	-16.6184	1700	-22	NA	NA	-0.245916	0.307658
22649061	22649561	AT1G61380	NA	1	22646071	22649521	0.810299	0.404717	22649061	22649561	AT1G61360	NA	1	22637727	22641825	0.667357	0.394573	1663	1	22638501	22639001	+	80	interaction39711	10560	14	0.070445	1e-06	2	0.070445	200	-1.33094	1556	52	-16.5912	1200	-10	-0.0955957	0.73887	0.623372	5.7e-05
11264999	11265499	AT1G31480	NA	1	11265879	11271701	0.670929	0.465213	11264999	11265499	AT1G31420	NA	1	11249599	11253915	0.698026	0.436294	54	1	11249900	11250400	+	1827	interaction22445	15099	11	0.070445	0.00154	1	0.070445	100	-0.454314	67	1658	-16.5863	1000	-6	0.449396	0.00245624	0.066311	0.713206
2182466	2182966	AT1G07110	NA	1	2178103	2184148	0.711705	0.405338	2182466	2182966	AT1G07090	NA	1	2173951	2174894	2.78366	3.5509	101	1	2174074	2174574	+	1583	interaction4485	8392	14	0.070445	1e-06	2	0.070445	200	-1.33093	53	1317	-16.5658	1200	-10	-0.301236	0.0544832	0.981745	7.02e-19
1798440	1798940	AT1G05925	NA	1	1798900	1799062	1.09023	0.705921	1798440	1798940	AT1G05910	Yes	1	1790223	1796647	0.709238	0.483841	184	1	1790078	1790578	+	1450	interaction3904	8362	17	0.070445	0	3	0.070445	300	-2.53109	127	1364	-16.5636	1400	-12	NA	NA	-0.0772658	0.655378
13626939	13627439	AT2G32010	NA	2	13624791	13629146	0.529964	0.366647	13626939	13627439	AT2G31985	NA	2	13613927	13615692	0.819317	0.857428	116	2	13613888	13614388	+	1263	interaction75665	13051	11	0.070445	0.002413	1	0.070445	100	-0.454502	70	1325	-16.5602	1000	-6	-0.898659	0.000809818	-1.10458	NA
26787512	26788012	AT1G71010	NA	1	26782838	26788970	0.751734	0.39187	26787512	26788012	AT1G71002	NA	1	26773538	26773725	3.08405	4.29226	93	1	26773587	26774087	+	1353	interaction51886	13925	11	0.070445	0.002219	1	0.070445	100	-0.454561	71	1542	-16.552	1000	-6	-0.028331	0.872527	NA	NA
12896977	12897477	AT1G35210	NA	1	12896651	12897402	2.61423	1.81006	12896977	12897477	AT1G35181	NA	1	12879305	12879470	1.37927	0.841118	94	1	12879048	12879548	+	1370	interaction25264	17929	11	0.070445	0.002229	1	0.070445	100	-0.454728	74	1151	-16.5288	1000	-6	0.382067	0.514282	NA	NA
5383474	5383974	AT1G15660	Yes	1	5381169	5385254	0.729471	0.416196	5383474	5383974	AT1G15630	Yes	1	5376792	5378027	2.27818	2.49801	113	1	5376521	5377021	+	920	interaction11136	6953	11	0.070445	0.002392	1	0.070445	100	-0.454781	75	939	-16.5215	1000	-6	-0.0186773	0.935999	-0.21681	0.874604
14459549	14460049	AT2G34240	Yes	2	14459156	14461802	0.720365	0.548791	14459549	14460049	AT2G34210	Yes	2	14445937	14450522	1.16228	1.74944	130	2	14446551	14447051	+	1920	interaction77997	12998	11	0.070445	0.002499	1	0.070445	100	-0.454931	78	1616	-16.5008	1000	-6	0.822462	0.0791564	-0.431997	0.708634
10307900	10308400	AT1G29460	NA	1	10307506	10308143	0.804255	0.426204	10307900	10308400	AT1G29430	NA	1	10302649	10303335	0.668439	0.466954	78	1	10303294	10303794	+	822	interaction20644	4606	21	0.070445	0	5	0.070445	500	-5.69537	76	698	-16.4993	1600	-18	0.522683	0.0178911	0.866484	1.79e-07
22385948	22386448	AT1G60800	NA	1	22383452	22387457	0.69975	0.427765	22385948	22386448	AT1G60783	NA	1	22374908	22375846	1.95051	2.38354	78	1	22374903	22375403	+	1111	interaction39119	11045	11	0.070445	0.002031	1	0.070445	100	-0.455025	80	1024	-16.4878	1000	-6	-0.644445	7.69e-06	-1.17601	NA
7917551	7918051	AT2G18193	Yes	2	7917504	7919277	0.744699	1.18379	7917551	7918051	AT2G18190	Yes	2	7914304	7915872	2.13753	3.84427	219	2	7914977	7915477	+	1643	interaction64602	2574	31	0.070445	0	10	0.070445	1000	-16.2289	170	1302	-16.4632	2100	-30	-2.01385	1.38e-21	-3.67447	6.02e-09
8076981	8077481	AT2G18610	NA	2	8076347	8077314	0.87337	0.761622	8076981	8077481	AT2G18590	Yes	2	8069944	8072866	1.81049	2.26716	153	2	8070012	8070512	+	691	interaction65310	6969	11	0.070445	0.002607	1	0.070445	100	-0.455241	85	666	-16.4584	1000	-6	NA	NA	-2.23485	NA
14964619	14965119	AT2G35620	Yes	2	14960939	14965497	0.69718	0.416395	14964619	14965119	AT2G35615	Yes	2	14959390	14960734	0.786177	0.688008	1744	2	14959144	14959644	+	56	interaction79264	5475	16	0.070445	0	3	0.070445	300	-2.55422	1865	37	-16.4572	1300	-12	-0.0271343	0.884985	NA	NA
24276520	24277020	AT1G65350	NA	1	24272517	24277275	2.8447	2.39499	24276520	24277020	AT1G65330	NA	1	24266480	24267320	2.9806	3.94252	1630	1	24266057	24266557	+	120	interaction44047	10463	11	0.070445	0.00244	1	0.070445	100	-0.455432	943	90	-16.4323	1000	-6	-0.508652	0.6685	-0.175036	0.838296
25345026	25345526	AT1G67630	NA	1	25344439	25348406	0.670925	0.376304	25345026	25345526	AT1G67620	Yes	1	25340574	25342082	0.87073	2.98113	133	1	25341303	25341803	+	1143	interaction48431	3723	11	0.070445	0.002515	1	0.070445	100	-0.455815	102	862	-16.3807	1000	-6	-0.206992	0.331742	-1.08149	2.96e-06
3232894	3233394	AT1G09932	Yes	1	3230449	3233109	2.99333	3.26614	3232894	3233394	AT1G09930	Yes	1	3227489	3230043	1.92126	3.91931	1136	1	3229885	3230385	+	100	interaction6100	3009	19	0.070445	0	4	0.070445	400	-4.00096	1088	89	-16.3608	1500	-16	1.05558	0.00205406	0.898331	0.581453
11012565	11013065	AT2G25810	NA	2	11012505	11014170	2.92599	2.5926	11012565	11013065	AT2G25790	NA	2	11000598	11004235	3.25083	4.24156	107	2	11000969	11001469	+	1697	interaction69818	11596	14	0.070445	1e-06	2	0.070445	200	-1.33092	63	1403	-16.3604	1200	-10	0.0929906	0.712467	0.384545	0.0332508
27883027	27883527	AT1G74150	NA	1	27880527	27883626	0.649977	0.608885	27883027	27883527	AT1G74140	Yes	1	27876904	27879780	1.24707	3.85648	148	1	27877397	27877897	+	1294	interaction54009	5630	25	0.070445	0	7	0.070445	700	-9.54692	103	1103	-16.2957	1800	-22	0.430352	0.158199	-0.894504	NA
20280072	20280572	AT1G54330	NA	1	20279566	20280952	4.73371	7.45773	20280072	20280572	AT1G54320	NA	1	20275533	20277957	0.687298	0.467096	1222	1	20276023	20276523	+	128	interaction34000	4049	19	0.070445	0	4	0.070445	400	-3.99896	1045	94	-16.2933	1500	-16	-0.552433	0.528216	0.157455	0.187382
12693914	12694414	AT2G29690	NA	2	12693870	12696975	0.712097	0.394693	12693914	12694414	AT2G29640	NA	2	12671205	12673300	0.68808	0.388442	1514	2	12672003	12672503	+	184	interaction73453	21911	11	0.070445	0.002716	1	0.070445	100	-0.456819	1645	157	-16.2475	1000	-6	-0.0169943	0.939978	0.331675	0.0982159
27190452	27190952	AT1G72240	NA	1	27190178	27190749	0.445644	0.797669	27190452	27190952	AT1G72220	Yes	1	27184280	27185830	1.37825	4.21322	76	1	27185479	27185979	+	1579	interaction52867	4973	14	0.070445	1e-06	2	0.070445	200	-1.33092	71	1609	-16.2415	1200	-10	-1.13894	0.111127	-1.44425	0.000426863
21118481	21118981	AT1G56410	Yes	1	21117146	21119241	1.10397	4.18956	21118481	21118981	AT1G56350	NA	1	21094777	21097988	0.744935	0.478378	225	1	21095423	21095923	+	1402	interaction36164	23058	11	0.070445	0.00282	1	0.070445	100	-0.456876	162	1105	-16.24	1000	-6	6.07326	0.000402257	0.151302	0.415936
11848659	11849159	AT2G27790	NA	2	11847108	11849559	0.649007	0.429878	11848659	11849159	AT2G27780	Yes	2	11845471	11846578	0.996929	2.7299	485	2	11845002	11845502	+	117	interaction71220	3657	14	0.070445	1e-06	2	0.070445	200	-1.33092	356	74	-16.2041	1200	-10	-0.0350197	0.907529	-1.17601	NA
26206016	26206516	AT1G69680	NA	1	26204804	26206928	0.777228	0.609366	26206016	26206516	AT1G69650	NA	1	26197497	26198821	2.39822	2.53263	235	1	26197979	26198479	+	1398	interaction50335	8037	11	0.070445	0.00284	1	0.070445	100	-0.457486	245	1098	-16.1608	1000	-6	0.0212989	0.932233	-1.17601	NA
20758529	20759029	AT1G55570	NA	1	20757766	20760076	4.12921	6.37835	20758529	20759029	AT1G55550	Yes	1	20748914	20753079	0.837173	1.73964	1771	1	20752472	20752972	+	139	interaction35275	6057	19	0.070445	0	4	0.070445	400	-3.9935	1250	111	-16.1133	1500	-16	1.5594	NA	-1.42341	9.81e-08
29606000	29606500	AT1G78720	Yes	1	29605628	29607510	1.80511	3.80567	29606000	29606500	AT1G78710	NA	1	29601252	29604557	1.50028	1.08213	1565	1	29603579	29604079	+	157	interaction57506	2421	47	0.070445	0	21	0.070445	2100	-47.7727	1148	140	-16.1111	2600	-56	-2.50936	4.67e-09	0.596515	4.45e-06
26220504	26221004	AT1G69700	NA	1	26220237	26221825	0.699218	0.37063	26220504	26221004	AT1G69670	NA	1	26202030	26204442	0.789564	0.515199	145	1	26203971	26204471	+	1552	interaction50466	16533	19	0.070445	0	4	0.070445	400	-3.98855	133	1426	-15.9534	1500	-16	-0.0688965	0.726705	0.0149467	0.940992
13332038	13332538	AT1G35860	NA	1	13332046	13334050	0.478804	0.324417	13332038	13332538	AT1G35850	NA	1	13330509	13331506	0.636734	0.471468	57	1	13330994	13331494	+	1216	interaction25928	1044	26	0.070445	0	9	0.070445	900	-14.662	33	737	-15.9347	1700	-26	NA	NA	NA	NA
6809936	6810436	AT1G19700	NA	1	6809723	6812663	0.706838	0.455256	6809936	6810436	AT1G19680	NA	1	6805456	6807862	0.608375	0.342883	87	1	6805991	6806491	+	2084	interaction12889	3945	27	0.070445	0	9	0.070445	900	-14.2384	56	1806	-15.9201	1800	-26	-0.930247	6.05e-11	0.146158	0.384804
17834444	17834944	AT2G42860	Yes	2	17833764	17835113	0.518784	0.624421	17834444	17834944	AT2G42850	Yes	2	17831654	17833432	0.757918	0.73674	145	2	17831164	17831664	+	531	interaction85426	3280	14	0.070445	1e-06	2	0.070445	200	-1.3309	114	518	-15.9033	1200	-10	0.140424	0.940498	-0.355725	0.43141
20830019	20830519	AT1G55720	Yes	1	20828117	20830640	1.32744	2.65288	20830019	20830519	AT1G55700	Yes	1	20821600	20823640	2.5018	4.37005	1828	1	20821549	20822049	+	224	interaction35532	8470	25	0.070445	0	7	0.070445	700	-9.50562	1451	140	-15.8495	1800	-22	-1.22654	NA	0.0108675	0.993927
26756391	26756891	AT1G70960	Yes	1	26756252	26757362	1.74911	4.97119	26756391	26756891	AT1G70950	Yes	1	26752688	26755359	0.795706	2.6457	252	1	26753321	26753821	+	785	interaction51816	3070	23	0.070445	0	6	0.070445	600	-7.51253	125	578	-15.8314	1700	-20	NA	NA	0.0858427	0.784441
252947	253447	AT1G01695	NA	1	252946	254495	0.62812	0.482806	252947	253447	AT1G01690	NA	1	249140	252462	0.669539	0.437973	201	1	249925	250425	+	1491	interaction627	3022	51	0.070445	0	24	0.070445	2400	-57.6312	143	1169	-15.8204	2700	-62	-0.338316	0.722054	-0.325475	0.130212
19133975	19134475	AT1G51600	NA	1	19132220	19135541	0.690757	0.412402	19133975	19134475	AT1G51580	NA	1	19125582	19128161	0.705799	0.328977	82	1	19126066	19126566	+	1956	interaction30837	7909	20	0.070445	0	5	0.070445	500	-5.7363	52	1555	-15.6743	1500	-16	0.0973926	0.56994	0.230058	0.203315
1797498	1797998	AT1G05920	Yes	1	1796777	1798254	0.778055	1.36642	1797498	1797998	AT1G05910	Yes	1	1790223	1796647	0.709238	0.483841	214	1	1790076	1790576	+	1450	interaction3900	7422	23	0.070445	0	6	0.070445	600	-7.49874	149	1364	-15.6438	1700	-20	-0.214224	NA	-0.0772658	0.655378
7400003	7400503	AT1G21130	NA	1	7399061	7400605	1.00493	0.869756	7400003	7400503	AT1G21110	NA	1	7389980	7391553	2.38758	3.39458	1620	1	7390492	7390992	+	302	interaction14050	9511	14	0.070445	2e-06	2	0.070445	200	-1.33089	1667	253	-15.6143	1200	-10	0.753882	0.00013956	1.14258	2.49e-10
16456126	16456626	AT2G39410	Yes	2	16455568	16458217	2.91276	6.38934	16456126	16456626	AT2G39400	Yes	2	16452611	16454801	1.06181	2.76246	1425	2	16452536	16453036	+	181	interaction81842	3590	32	0.070445	0	11	0.070445	1100	-18.6833	1216	174	-15.5875	2100	-32	-0.0265475	0.951226	0.75192	0.000407841
17602431	17602931	AT1G47800	NA	1	17601512	17602676	3.53482	6.57828	17602431	17602931	AT1G47770	Yes	1	17590265	17591261	1.15215	1.00419	692	1	17590521	17591021	+	1773	interaction27740	11910	14	0.070445	2e-06	2	0.070445	200	-1.33089	578	1212	-15.4864	1200	-10	NA	NA	0.291133	NA
24468898	24469398	AT1G65790	Yes	1	24468931	24472329	1.63894	3.39407	24468898	24469398	AT1G65760	NA	1	24458590	24459715	2.4847	3.27925	1045	1	24458532	24459032	+	915	interaction45086	10366	14	0.070445	2e-06	2	0.070445	200	-1.33089	980	725	-15.4664	1200	-10	-1.18344	0.0367871	0.839807	0.343017
22278000	22278500	AT1G60460	NA	1	22275483	22279007	0.71332	0.402325	22278000	22278500	AT1G60450	NA	1	22271225	22273214	1.23838	1.11047	94	1	22272932	22273432	+	1717	interaction38991	5068	22	0.070445	0	6	0.070445	600	-7.59602	64	1560	-15.4656	1600	-20	-0.415983	0.33474	-0.630602	NA
4020489	4020989	AT2G10450	Yes	2	4020304	4020773	1.28773	1.24774	4020489	4020989	AT2G10440	NA	2	4013751	4018046	0.588267	0.417226	1124	2	4014489	4014989	+	36	interaction61551	6000	10	0.070445	0.011975	1	0.070445	100	-0.443924	841	20	-15.4353	900	-6	-1.83925	NA	NA	NA
14018088	14018588	AT2G33030	NA	2	14017683	14018340	0.796428	1.19677	14018088	14018588	AT2G33010	Yes	2	14010837	14013246	0.670303	1.46557	382	2	14012961	14013461	+	43	interaction77131	5127	10	0.070445	0.014653	1	0.070445	100	-0.443924	309	20	-15.4353	900	-6	NA	NA	1.05509	NA
24040000	24040500	AT1G64700	Yes	1	24039809	24040595	1.46562	2.34537	24040000	24040500	AT1G64660	Yes	1	24028917	24030780	0.834738	1.72807	380	1	24029490	24029990	+	1901	interaction43438	10510	27	0.070445	0	8	0.070445	800	-11.561	297	1730	-15.4029	1900	-26	-0.379445	0.266667	0.88306	0.00475227
4260546	4261046	AT1G12490	Yes	1	4260782	4261869	3.59788	7.92622	4260546	4261046	AT1G12470	NA	1	4251031	4257392	0.726084	0.460418	1336	1	4255067	4255567	+	88	interaction8385	5479	18	0.070445	0	4	0.070445	400	-4.02462	1119	55	-15.3947	1400	-14	-2.42453	0.0477967	0.225622	0.12132
7570038	7570538	AT2G17430	NA	2	7568017	7570840	0.619013	0.439301	7570038	7570538	AT2G17420	NA	2	7564344	7566539	0.686594	0.373179	212	2	7564958	7565458	+	2103	interaction63902	5080	30	0.070445	0	10	0.070445	1000	-16.2475	157	1932	-15.328	2000	-30	0.150967	0.664355	0.197528	0.0660054
30049880	30050380	AT1G79890	NA	1	30048654	30052203	0.76208	0.399832	30049880	30050380	AT1G79870	Yes	1	30044745	30046027	0.581035	0.379624	44	1	30044588	30045088	+	1285	interaction58441	5292	10	0.070445	0.014994	1	0.070445	100	-0.445282	22	1391	-15.2437	900	-6	-0.255119	0.404496	-0.014479	0.939573
24811022	24811522	AT1G66500	Yes	1	24811148	24812650	1.14741	2.74573	24811022	24811522	AT1G66490	Yes	1	24809420	24810549	4.53334	9.12238	877	1	24809542	24810042	+	1701	interaction46910	1480	72	0.072568	0	36	0.070445	3600	-97.6808	615	1301	-15.1765	3389.33	-94	-0.416448	0.144007	NA	NA
13618450	13618950	AT2G32000	NA	2	13615899	13621641	0.843064	0.499688	13618450	13618950	AT2G31985	NA	2	13613927	13615692	0.819317	0.857428	176	2	13613596	13614096	+	1597	interaction75629	4854	28	0.070445	0	9	0.070445	900	-13.915	134	1376	-15.1673	1900	-26	0.130521	0.361674	-1.10458	NA
8658085	8658585	AT1G24430	Yes	1	8658002	8659506	0.737803	0.932953	8658085	8658585	AT1G24420	NA	1	8656686	8657997	0.724488	0.8972	1193	1	8656540	8657040	+	860	interaction17204	1545	53	0.070445	0	24	0.070445	2400	-56.1428	873	644	-15.1465	2900	-64	-0.448994	0.0871739	-1.61076	0.000296267
7752954	7753454	AT1G22015	NA	1	7751001	7753519	2.20122	3.33419	7752954	7753454	AT1G22000	Yes	1	7744188	7747785	1.13807	1.86249	1651	1	7746028	7746528	+	101	interaction15006	6926	25	0.070445	0	8	0.070445	800	-11.871	1344	59	-15.1373	1700	-24	NA	NA	-0.479327	NA
7338552	7339052	AT2G16920	NA	2	7334225	7339167	0.66949	0.425258	7338552	7339052	AT2G16910	NA	2	7331720	7334254	0.887845	0.654799	1855	2	7333537	7334037	+	102	interaction63284	5015	27	0.070445	0	9	0.070445	900	-14.106	1682	73	-15.1285	1800	-26	0.0834083	0.597144	-0.580273	0.746129
9284969	9285469	AT2G21770	Yes	2	9284836	9289536	0.658543	0.789758	9284969	9285469	AT2G21730	Yes	2	9280043	9281623	1.47657	4.99706	104	2	9280849	9281349	+	972	interaction66916	4120	22	0.070445	0	6	0.070445	600	-7.57058	75	646	-15.1169	1600	-20	-0.89305	0.002959	-2.52864	1.14e-05
17293502	17294002	AT2G41470	Yes	2	17289951	17293749	1.39262	2.58963	17293502	17294002	AT2G41460	NA	2	17285722	17288928	0.781498	0.429746	1705	2	17286846	17287346	+	57	interaction83918	6656	13	0.070445	9e-06	2	0.070445	200	-1.33099	1443	35	-15.0456	1100	-8	0.338514	0.864991	-0.0796961	0.679472
17712968	17713468	AT2G42550	Yes	2	17713195	17714230	1.8752	4.82502	17712968	17713468	AT2G42520	NA	2	17704831	17708947	0.787159	0.400062	115	2	17705500	17706000	+	1200	interaction84994	7468	16	0.070445	0	3	0.070445	300	-2.53448	93	1078	-14.9957	1300	-12	NA	NA	0.0559377	0.699535
24276543	24277043	AT1G65350	NA	1	24272517	24277275	2.8447	2.39499	24276543	24277043	AT1G65342	NA	1	24271275	24271700	2.8656	3.25197	1630	1	24271153	24271653	+	138	interaction44056	5390	16	0.070445	0	3	0.070445	300	-2.53371	943	99	-14.9448	1300	-12	-0.508652	0.6685	NA	NA
746986	747486	AT2G02680	Yes	2	745774	748573	2.05013	4.3754	746986	747486	AT2G02660	NA	2	738503	739769	5.46246	8.7412	1254	2	739468	739968	+	55	interaction59732	7518	15	0.070445	0	3	0.070445	300	-2.56078	949	31	-14.9023	1200	-12	0.0680396	0.887229	NA	NA
247093	247593	AT1G01680	Yes	1	246410	248367	1.48564	8.18327	247093	247593	AT1G01660	Yes	1	240056	242608	0.840335	2.66747	300	1	242035	242535	+	1879	interaction529	5058	30	0.070445	0	10	0.070445	1000	-16.1621	243	1387	-14.8564	2000	-30	-0.335595	0.76541	-2.25236	1.15e-09
18226364	18226864	AT1G49260	Yes	1	18225869	18226967	3.89973	4.94147	18226364	18226864	AT1G49250	Yes	1	18220532	18224256	2.39619	3.51233	2078	1	18222506	18223006	+	244	interaction29009	3858	33	0.070445	0	12	0.070445	1200	-21.2308	1467	176	-14.8358	2100	-34	NA	NA	0.856731	0.656682
20380941	20381441	AT1G54570	NA	1	20380477	20385125	0.693693	0.468135	20380941	20381441	AT1G54560	Yes	1	20371648	20379745	0.782009	0.636355	190	1	20378687	20379187	+	682	interaction34410	2254	16	0.070445	0	3	0.070445	300	-2.53172	119	369	-14.8147	1300	-12	-0.0608254	0.78766	0.261952	0.893095
6299462	6299962	AT2G14710	NA	2	6298678	6300150	2.61771	4.47518	6299462	6299962	AT2G14700	NA	2	6292465	6295726	1.40168	1.634	111	2	6294350	6294850	+	803	interaction62310	5112	18	0.070445	0	4	0.070445	400	-4.0037	83	492	-14.7553	1400	-14	NA	NA	NA	NA
4450503	4451003	AT1G13050	NA	1	4450237	4451742	0.580569	0.359125	4450503	4451003	AT1G13030	NA	1	4444042	4447406	0.65281	0.413409	2082	1	4446078	4446578	+	109	interaction8880	4425	18	0.070445	0	4	0.070445	400	-4.00228	1592	86	-14.7142	1400	-14	0.308876	0.140812	0.242892	0.141487
11515520	11516020	AT2G26980	NA	2	11514702	11518734	0.613632	0.369124	11515520	11516020	AT2G26975	NA	2	11512860	11513553	0.754581	0.435002	127	2	11513000	11513500	+	1714	interaction70514	2520	30	0.070445	0	11	0.070445	1100	-18.9995	82	1684	-14.6907	1900	-30	-0.143838	0.279118	-0.19394	0.199912
24123955	24124455	AT1G64940	Yes	1	24123788	24125324	2.25087	4.73046	24123955	24124455	AT1G64930	NA	1	24120925	24122461	3.01019	5.83193	209	1	24120929	24121429	+	646	interaction43678	3026	16	0.070445	0	3	0.070445	300	-2.52919	160	523	-14.6542	1300	-12	1.53943	0.00418444	0.242013	0.707406
20833911	20834411	AT1G55730	NA	1	20831051	20834519	0.760713	0.533159	20833911	20834411	AT1G55720	Yes	1	20828117	20830640	1.32744	2.65288	1471	1	20828984	20829484	+	283	interaction35578	4927	33	0.070445	0	12	0.070445	1200	-21.1813	1472	207	-14.6323	2100	-34	0.0161752	0.933766	-1.22654	NA
18067357	18067857	AT2G43510	NA	2	18067171	18067802	2.06685	1.76782	18067357	18067857	AT2G43500	NA	2	18061924	18066639	0.637694	0.431773	1153	2	18065567	18066067	+	232	interaction85730	1790	26	0.070445	0	8	0.070445	800	-11.6195	1044	166	-14.5701	1800	-24	2.74899	4.83e-20	-0.602692	0.0351472
4852999	4853499	AT1G14190	Yes	1	4852801	4854307	0.770241	0.727288	4852999	4853499	AT1G14185	Yes	1	4850273	4852096	0.740552	1.15038	873	1	4850499	4850999	+	1102	interaction9946	2500	58	0.070445	0	28	0.070445	2800	-69.4554	595	889	-14.5642	3000	-72	-0.0529085	0.845361	-0.213095	0.456339
10818537	10819037	AT2G25420	NA	2	10816748	10821053	0.647031	0.418979	10818537	10819037	AT2G25360	Yes	2	10804248	10805761	1.8947	1.84538	74	2	10805096	10805596	+	1862	interaction69514	13441	10	0.070445	0.021611	1	0.070445	100	-0.450752	37	1462	-14.5463	900	-6	0.00809915	0.973963	NA	NA
14792444	14792944	AT2G35090	Yes	2	14792170	14793032	1.76847	1.50462	14792444	14792944	AT2G35075	Yes	2	14786681	14789023	0.783201	0.553873	65	2	14787058	14787558	+	1348	interaction78957	5386	25	0.070445	0	8	0.070445	800	-11.7899	74	1030	-14.529	1700	-24	NA	NA	-0.244059	0.477637
26716507	26717007	AT1G70850	NA	1	26714865	26716829	3.39207	5.72618	26716507	26717007	AT1G70830	NA	1	26709946	26711462	4.08325	6.22055	326	1	26710533	26711033	+	1599	interaction51442	5974	33	0.070445	0	12	0.070445	1200	-21.1512	232	1353	-14.5112	2100	-34	-0.256202	0.416639	-0.032709	0.888533
2392001	2392501	AT1G07720	NA	1	2390654	2392453	1.63398	2.9368	2392001	2392501	AT1G07710	NA	1	2386274	2387986	0.773296	0.30688	486	1	2387065	2387565	+	81	interaction4931	4936	10	0.070445	0.022473	1	0.070445	100	-0.45153	533	41	-14.4554	900	-6	0.181623	0.445308	0.0333598	0.975785
8425988	8426488	AT1G23850	NA	1	8425738	8427235	0.678794	0.376784	8425988	8426488	AT1G23800	NA	1	8412050	8414879	0.742387	0.587083	71	1	8414101	8414601	+	1310	interaction16707	11887	10	0.070445	0.02118	1	0.070445	100	-0.45153	41	1182	-14.4554	900	-6	0.514613	0.148617	-0.700102	2.96e-06
11139072	11139572	AT2G26160	Yes	2	11137977	11139451	2.83749	5.26617	11139072	11139572	AT2G26140	NA	2	11131577	11135345	0.778129	0.442527	974	2	11132508	11133008	+	81	interaction69939	6564	10	0.070445	0.022473	1	0.070445	100	-0.451702	812	42	-14.4356	900	-6	NA	NA	-0.0858928	0.538185
5616031	5616531	AT1G16440	Yes	1	5615814	5617672	0.864475	1.0466	5616031	5616531	AT1G16380	Yes	1	5598452	5601367	0.921406	3.45813	1198	1	5600482	5600982	+	81	interaction11449	15549	13	0.070445	1.3e-05	2	0.070445	200	-1.33093	968	56	-14.4062	1100	-8	-0.70814	0.11297	NA	NA
7190703	7191203	AT2G16586	Yes	2	7190936	7191938	28.9324	20.3155	7190703	7191203	AT2G01010	Yes	2	3705	5513	101.544	78.6211	730	2	3282	3782	+	736	interaction63050	7187421	16	0.070445	0	3	0.070445	300	-2.52429	495	532	-14.3531	1300	-12	2.42725	NA	0.332814	0.673453
12315519	12316019	AT1G33910	NA	1	12314903	12316258	1.51674	1.27915	12315519	12316019	AT1G33870	NA	1	12301324	12302467	2.07499	2.49211	952	1	12302172	12302672	+	1436	interaction24355	13347	16	0.070445	0	3	0.070445	300	-2.52387	605	969	-14.3278	1300	-12	0.0240888	NA	-0.908908	0.605119
12448978	12449478	AT1G34180	Yes	1	12448566	12451287	0.797443	1.14907	12448978	12449478	AT1G34170	NA	1	12443546	12446764	0.822835	0.546444	934	1	12444020	12444520	+	108	interaction24737	4958	17	0.070445	0	4	0.070445	400	-4.05072	799	39	-14.3049	1300	-14	-0.176816	0.676253	NA	NA
10126469	10126969	AT1G29025	NA	1	10124347	10127068	0.73331	0.944657	10126469	10126969	AT1G29020	Yes	1	10120496	10122902	0.864166	1.48493	1654	1	10122462	10122962	+	748	interaction19978	4007	46	0.070445	0	20	0.070445	2000	-43.5752	1348	602	-14.2947	2600	-52	-0.595413	0.0776788	-0.675312	0.179415
8571506	8572006	AT1G24200	Yes	1	8571172	8572377	1.05776	0.975139	8571506	8572006	AT1G24190	NA	1	8563557	8570505	0.785046	0.447965	1861	1	8569000	8569500	+	149	interaction16965	2506	39	0.070445	0	17	0.070445	1700	-35.6093	1678	110	-14.2649	2200	-44	NA	NA	0.0909301	0.607054
13284558	13285058	AT2G31170	NA	2	13282354	13285666	0.760907	0.483816	13284558	13285058	AT2G31160	NA	2	13277810	13278745	5.02195	7.46576	1070	2	13277887	13278387	+	1060	interaction74938	6671	30	0.070445	0	10	0.070445	1000	-16.0446	1089	1052	-14.2533	2000	-28	-0.0435376	0.83488	-0.661087	0.00262067
7977487	7977987	AT1G22570	NA	1	7976619	7978573	1.24867	1.13229	7977487	7977987	AT1G22530	NA	1	7955492	7958442	0.799098	0.851314	1929	1	7956467	7956967	+	69	interaction15697	21020	10	0.070445	0.020877	1	0.070445	100	-0.453358	1833	55	-14.2489	900	-6	0.512009	0.0842839	0.970142	0.00458783
24857474	24857974	AT1G66640	NA	1	24857437	24859011	2.36342	3.37927	24857474	24857974	AT1G66610	Yes	1	24849715	24851450	0.623914	1.99655	840	1	24851067	24851567	+	96	interaction47090	6407	10	0.070445	0.023855	1	0.070445	100	-0.453454	558	56	-14.2384	900	-6	NA	NA	0.747547	NA
26878442	26878942	AT1G71310	NA	1	26877744	26880024	0.682141	0.478696	26878442	26878942	AT1G71300	Yes	1	26874063	26878340	0.76732	0.752846	92	1	26874048	26874548	+	1032	interaction52096	4394	10	0.070445	0.023533	1	0.070445	100	-0.453454	56	744	-14.2384	900	-6	0.00215729	0.992926	0.479591	NA
26829087	26829587	AT1G71160	Yes	1	26828700	26830208	2.09727	4.351	26829087	26829587	AT1G71110	NA	1	26818082	26821004	0.605419	0.320926	1558	1	26820535	26821035	+	76	interaction51933	8552	13	0.070445	1.2e-05	2	0.070445	200	-1.33092	1059	69	-14.2222	1100	-8	NA	NA	0.607646	0.000491477
25405605	25406105	AT1G67760	NA	1	25405579	25406372	4.92351	6.24525	25405605	25406105	AT1G67720	NA	1	25386340	25391073	0.64323	0.382256	1732	1	25389458	25389958	+	101	interaction48476	16147	13	0.070445	1.5e-05	2	0.070445	200	-1.33092	1542	70	-14.2112	1100	-8	0.57102	0.388069	0.117422	0.569092
1070112	1070612	AT1G04120	Yes	1	1064449	1071047	0.76949	0.476101	1070112	1070612	AT1G04110	Yes	1	1061456	1063784	0.721136	1.41534	2057	1	1061478	1061978	+	87	interaction2454	8634	26	0.070445	0	9	0.070445	900	-14.1747	1990	63	-14.1948	1700	-26	0.0344874	0.805399	-0.0614235	0.87578
3405033	3405533	AT1G10385	Yes	1	3403223	3405856	1.43369	4.59588	3405033	3405533	AT1G10380	Yes	1	3400605	3402324	1.83873	3.08968	208	1	3400643	3401143	+	671	interaction6407	4390	18	0.070445	0	4	0.070445	400	-3.98337	168	558	-14.189	1400	-14	-0.69375	0.631936	-0.462127	0.0402083
12051560	12052060	AT2G28260	NA	2	12049988	12052453	0.703095	0.875389	12051560	12052060	AT2G28250	NA	2	12043481	12046537	0.696186	0.395223	201	2	12043565	12044065	+	1425	interaction71719	7995	18	0.070445	0	4	0.070445	400	-3.98258	175	1288	-14.1681	1400	-14	-0.635342	0.000477786	-0.670493	0.000834896
13261417	13261917	AT2G31110	Yes	2	13258328	13262099	1.20754	1.15079	13261417	13261917	AT2G31083	NA	2	13252218	13252765	4.38907	6.14047	655	2	13252418	13252918	+	124	interaction74885	8999	10	0.070445	0.025484	1	0.070445	100	-0.454109	627	64	-14.1668	900	-6	0.405982	0.0914384	-0.26292	0.669785
17824018	17824518	AT2G42835	Yes	2	17823264	17824842	1.32651	1.92576	17824018	17824518	AT2G42830	Yes	2	17820254	17824013	2.63629	4.52922	206	2	17820402	17820902	+	1613	interaction85316	3616	35	0.070445	0	14	0.070445	1400	-26.7561	129	1450	-14.1573	2100	-36	-0.318547	NA	0.616937	0.543864
14557542	14558042	AT2G34555	Yes	2	14556987	14558697	0.69152	1.74831	14557542	14558042	AT2G34500	Yes	2	14539478	14541406	0.695556	0.79088	1929	2	14539015	14539515	+	97	interaction78315	18527	10	0.070445	0.023927	1	0.070445	100	-0.454379	1908	68	-14.1377	900	-6	-1.27124	NA	0.0515997	0.873123
6628439	6628939	AT1G19220	NA	1	6628067	6633087	0.808972	2.13551	6628439	6628939	AT1G19190	NA	1	6623875	6624977	1.34027	1.06925	89	1	6623945	6624445	+	1095	interaction12799	4494	10	0.070445	0.023274	1	0.070445	100	-0.454441	69	1046	-14.1309	900	-6	0.184683	0.331156	0.201439	0.628069
27876974	27877474	AT1G74140	Yes	1	27876904	27879780	1.24707	3.85648	27876974	27877474	AT1G74130	Yes	1	27873610	27876033	0.750103	3.73439	1837	1	27875002	27875502	+	201	interaction53937	1972	41	0.070445	0	18	0.070445	1800	-38.3203	1538	146	-14.1133	2300	-46	-0.894504	NA	-1.40397	NA
17952083	17952583	AT1G48550	NA	1	17950568	17952694	0.728902	0.364153	17952083	17952583	AT1G48510	NA	1	17934828	17936915	1.02267	1.10906	91	1	17934974	17935474	+	1979	interaction28212	17109	10	0.070445	0.02345	1	0.070445	100	-0.454674	73	1769	-14.106	900	-6	0.16017	0.379832	0.760208	0.140246
4453138	4453638	AT1G13060	NA	1	4452211	4454876	0.619302	0.329811	4453138	4453638	AT1G13040	NA	1	4447646	4449200	0.62978	0.403305	102	1	4448397	4448897	+	831	interaction8914	4741	10	0.070445	0.02428	1	0.070445	100	-0.454833	76	661	-14.089	900	-6	0.0205193	0.892401	0.393369	0.029208
9844061	9844561	AT1G28180	Yes	1	9843074	9845002	0.813	2.15034	9844061	9844561	AT1G28170	Yes	1	9841331	9842312	2.13733	3.31286	125	1	9841474	9841974	+	1589	interaction19253	2587	41	0.070445	0	19	0.070445	1900	-42.4829	77	1298	-14.0869	2200	-48	-1.6354	NA	1.25106	NA
29071995	29072495	AT1G77360	NA	1	29071982	29073536	0.730689	0.362307	29071995	29072495	AT1G77330	Yes	1	29062989	29064537	0.857524	1.38481	117	1	29063559	29064059	+	946	interaction56227	8436	10	0.070445	0.025144	1	0.070445	100	-0.454883	77	775	-14.0837	900	-6	0.671858	0.00626218	0.0229385	0.944982
960437	960937	AT1G03820	Yes	1	959868	960728	1.66243	2.87669	960437	960937	AT1G03770	NA	1	944571	947483	0.746286	0.422799	1545	1	944486	944986	+	102	interaction2090	15951	10	0.070445	0.02428	1	0.070445	100	-0.455025	1271	80	-14.0686	900	-6	-0.610324	5.48e-05	0.60296	0.00204079
20756112	20756612	AT1G55560	Yes	1	20754320	20756656	1.98587	3.0068	20756112	20756612	AT1G55546	Yes	1	20743827	20745109	1.23374	2.79653	1845	1	20744446	20744946	+	116	interaction35230	11666	10	0.070445	0.025096	1	0.070445	100	-0.455025	1581	80	-14.0686	900	-6	NA	NA	-2.06546	NA
19906525	19907025	AT1G53350	Yes	1	19903898	19907515	1.12025	1.68397	19906525	19907025	AT1G53345	Yes	1	19902494	19903700	0.999392	3.71748	595	1	19902907	19903407	+	87	interaction33044	3618	10	0.070445	0.023084	1	0.070445	100	-0.4552	498	84	-14.0501	900	-6	-1.09174	9.53e-12	-0.417864	0.209392
23388905	23389405	AT1G63080	NA	1	23387630	23390816	0.849353	0.776877	23388905	23389405	AT1G63070	NA	1	23385323	23387167	2.21823	3.77694	279	1	23386000	23386500	+	1270	interaction41736	2905	18	0.070445	0	4	0.070445	400	-3.97773	236	993	-14.0403	1400	-14	0.337354	0.133581	2.23871	NA
11939070	11939570	AT2G28050	NA	2	11938264	11939653	0.890098	0.42681	11939070	11939570	AT2G28020	Yes	2	11933701	11934060	1.73109	6.22675	274	2	11933576	11934076	+	1016	interaction71433	5494	20	0.070445	0	5	0.070445	500	-5.64487	184	782	-14.011	1500	-16	0.659196	0.00179762	NA	NA
5583907	5584407	AT1G16330	NA	1	5582386	5587391	0.691648	0.475294	5583907	5584407	AT1G16310	Yes	1	5578430	5580693	0.870731	1.39337	150	1	5578006	5578506	+	671	interaction11416	5901	10	0.070445	0.026469	1	0.070445	100	-0.455603	95	635	-14.0077	900	-6	-0.234978	0.433169	-0.67925	0.00235807
4868179	4868679	AT1G14250	Yes	1	4868451	4871488	1.51806	1.92668	4868179	4868679	AT1G14240	Yes	1	4864901	4868000	2.0031	3.14945	762	1	4867514	4868014	+	97	interaction10081	665	10	0.070445	0.023927	1	0.070445	100	-0.455843	697	103	-13.9828	900	-6	-0.396348	0.210887	-0.475739	0.0379675
27573485	27573985	AT1G73340	Yes	1	27573115	27575419	0.761635	0.853675	27573485	27573985	AT1G73310	NA	1	27562814	27565177	0.858957	0.468034	1846	1	27564028	27564528	+	142	interaction53447	9457	13	0.070445	1.8e-05	2	0.070445	200	-1.33091	1319	102	-13.9775	1100	-8	-0.806954	0.0950837	-0.0381977	0.877046
19760458	19760958	AT1G53030	NA	1	19760000	19761452	0.617883	0.365518	19760458	19760958	AT1G53023	Yes	1	19754213	19755843	1.66961	5.615	102	1	19755653	19756153	+	755	interaction32777	4805	10	0.070445	0.02428	1	0.070445	100	-0.455897	105	775	-13.9771	900	-6	0.124378	0.573462	NA	NA
3002694	3003194	AT1G09290	NA	1	3001516	3003762	0.650492	0.318395	3002694	3003194	AT1G09280	NA	1	2998099	3001315	0.548194	0.357107	314	1	2999554	3000054	+	146	interaction5671	3140	10	0.070445	0.026335	1	0.070445	100	-0.455999	309	109	-13.9665	900	-6	0.310684	0.0337547	0.4023	5.7e-05
11010027	11010527	AT1G30925	Yes	1	11009887	11011792	2.09738	4.32477	11010027	11010527	AT1G30920	Yes	1	11004241	11005444	3.63433	5.41802	160	1	11004932	11005432	+	1056	interaction21866	5095	10	0.070445	0.026766	1	0.070445	100	-0.456023	110	887	-13.964	900	-6	NA	NA	-1.08045	NA
29189888	29190388	AT1G77670	NA	1	29188900	29190975	0.821067	0.384753	29189888	29190388	AT1G77640	NA	1	29178736	29179675	2.33618	2.40475	110	1	29178889	29179389	+	1226	interaction56441	10999	10	0.070445	0.024769	1	0.070445	100	-0.456047	111	1250	-13.9615	900	-6	0.417975	0.0206279	0.131203	0.907529
4848079	4848579	AT1G14180	NA	1	4847161	4849207	0.731279	0.370099	4848079	4848579	AT1G14170	NA	1	4843233	4845847	0.752698	0.583796	944	1	4843510	4844010	+	121	interaction9869	4569	13	0.070445	1.7e-05	2	0.070445	200	-1.3309	757	109	-13.9456	1100	-8	-0.10821	0.610509	0.403543	0.0356826
23337428	23337928	AT1G62990	NA	1	23337364	23340688	2.78341	3.60303	23337428	23337928	AT1G62980	NA	1	23331675	23333110	3.17042	4.91721	1333	1	23332021	23332521	+	139	interaction41576	5407	13	0.070445	1.8e-05	2	0.070445	200	-1.3309	1162	112	-13.9332	1100	-8	-0.150849	0.453453	-0.287308	0.208114
20758519	20759019	AT1G55570	NA	1	20757766	20760076	4.12921	6.37835	20758519	20759019	AT1G55535	NA	1	20731645	20733997	0.638614	0.445322	1771	1	20733530	20734030	+	125	interaction35262	24989	13	0.070445	1.7e-05	2	0.070445	200	-1.3309	1250	120	-13.9034	1100	-8	1.5594	NA	0.151649	0.484775
3841842	3842342	AT1G11410	NA	1	3841285	3844432	0.560334	0.395468	3841842	3842342	AT1G11390	NA	1	3834458	3837629	0.608036	0.375614	593	1	3836922	3837422	+	163	interaction7156	4920	10	0.070445	0.026849	1	0.070445	100	-0.456622	406	142	-13.9024	900	-6	-1.03361	1.23e-08	0.173544	0.191131
24717172	24717672	AT1G66300	NA	1	24716496	24718050	3.52434	4.70032	24717172	24717672	AT1G66280	NA	1	24706511	24709785	2.67134	3.20612	1443	1	24707551	24708051	+	173	interaction46309	9621	10	0.070445	0.027119	1	0.070445	100	-0.456665	1025	145	-13.8981	900	-6	1.15559	0.327908	0.80597	0.00111192
24513469	24513969	AT1G65890	NA	1	24512456	24514659	2.85175	5.34727	24513469	24513969	AT1G65860	NA	1	24499065	24502745	2.17178	2.73575	1629	1	24500906	24501406	+	166	interaction45368	12563	10	0.070445	0.026931	1	0.070445	100	-0.456807	1235	156	-13.8836	900	-6	-2.10819	0.00519371	-0.85855	0.0018477
19019065	19019565	AT1G51310	NA	1	19018978	19021804	0.64933	0.403026	19019065	19019565	AT1G51290	NA	1	19012172	19013306	4.58213	7.164	239	1	19012021	19012521	+	1283	interaction30482	7044	10	0.070445	0.028388	1	0.070445	100	-0.456842	159	1301	-13.88	900	-6	0.372728	0.0355299	NA	NA
21111553	21112053	AT1G56400	NA	1	21111804	21113621	2.7728	4.35732	21111553	21112053	AT1G56380	NA	1	21101326	21102701	2.32238	4.19863	166	1	21101171	21101671	+	1073	interaction36097	10382	10	0.070445	0.026931	1	0.070445	100	-0.456842	159	921	-13.88	900	-6	NA	NA	NA	NA
3404985	3405485	AT1G10385	Yes	1	3403223	3405856	1.43369	4.59588	3404985	3405485	AT1G10360	NA	1	3395557	3396849	0.569725	0.396719	208	1	3396391	3396891	+	1435	interaction6404	8594	10	0.070445	0.027866	1	0.070445	100	-0.45694	168	1524	-13.8701	900	-6	-0.69375	0.631936	-0.728931	1.32e-11
27766036	27766536	AT1G73840	NA	1	27763684	27766364	0.523314	0.373782	27766036	27766536	AT1G73830	NA	1	27759972	27761588	1.04015	0.813394	138	1	27759921	27760421	+	734	interaction53729	6115	10	0.070445	0.026056	1	0.070445	100	-0.45699	173	879	-13.865	900	-6	0.296094	0.0323317	0.777715	2.56e-05
18913356	18913856	AT1G51020	NA	1	18913109	18913828	4.75243	7.43682	18913356	18913856	AT1G50990	NA	1	18902929	18905204	2.67306	4.61359	1211	1	18904871	18905371	+	142	interaction29800	8485	13	0.070445	1.8e-05	2	0.070445	200	-1.3309	1092	133	-13.8628	1100	-8	NA	NA	0.747547	NA
6294370	6294870	AT2G14700	NA	2	6292465	6295726	1.40168	1.634	6294370	6294870	AT2G14692	NA	2	6287639	6287771	2.31267	2.7068	803	2	6287563	6288063	+	900	interaction62276	6807	18	0.070445	0	4	0.070445	400	-3.97053	492	847	-13.8554	1400	-14	NA	NA	1.89088	NA
29619443	29619943	AT1G78770	Yes	1	29616918	29621447	0.82648	0.496181	29619443	29619943	AT1G78760	Yes	1	29615173	29616738	2.26839	3.32655	185	1	29614797	29615297	+	871	interaction57642	4646	10	0.070445	0.0274	1	0.070445	100	-0.457149	191	809	-13.8489	900	-6	-0.0523653	0.810242	-0.705317	0.6756
24582942	24583442	AT1G66030	NA	1	24583148	24583652	1.72763	1.40734	24582942	24583442	AT1G66020	NA	1	24577552	24580185	2.3424	3.46805	672	1	24577502	24578002	+	1136	interaction45679	5440	18	0.070445	0	4	0.070445	400	-3.96998	536	1049	-13.8417	1400	-14	-1.16798	NA	-0.454109	0.394993
22505044	22505544	AT1G61095	Yes	1	22504513	22505511	1.50612	4.61651	22505044	22505544	AT1G61060	Yes	1	22488547	22489711	1.11592	1.55062	274	1	22488631	22489131	+	1902	interaction39585	16413	10	0.070445	0.028847	1	0.070445	100	-0.457254	205	1482	-13.8384	900	-6	NA	NA	3.3585	NA
8939049	8939549	AT1G25450	Yes	1	8938478	8940387	2.02455	4.35798	8939049	8939549	AT1G25425	Yes	1	8922699	8923331	1.38451	2.84121	263	1	8922986	8923486	+	946	interaction17648	16063	10	0.070445	0.028713	1	0.070445	100	-0.457268	207	893	-13.837	900	-6	0.379769	0.0298184	-0.425241	0.100144
25720490	25720990	AT1G68540	NA	1	25720023	25721410	0.653911	0.550809	25720490	25720990	AT1G68526	NA	1	25711868	25712238	0.650075	0.903824	175	1	25712035	25712535	+	868	interaction49230	8455	13	0.070445	2e-05	2	0.070445	200	-1.3309	155	1003	-13.8102	1100	-8	-0.573496	0.000562922	2.0084	NA
27499498	27499998	AT1G73130	NA	1	27499034	27502055	0.637849	0.424714	27499498	27499998	AT1G73110	NA	1	27494120	27496878	0.695206	0.45756	1441	1	27495020	27495520	+	271	interaction53095	4478	10	0.070445	0.028816	1	0.070445	100	-0.45758	1437	266	-13.8057	900	-6	-0.0390937	0.896641	-0.274818	0.142257
18217508	18218008	AT1G49240	NA	1	18215871	18218313	0.664193	0.378097	18217508	18218008	AT1G49200	NA	1	18198226	18199168	0.922737	0.554512	213	1	18198505	18199005	+	2086	interaction28911	19003	13	0.070445	2.1e-05	2	0.070445	200	-1.3309	161	1900	-13.7984	1100	-8	0.236848	0.0909397	0.778059	0.00445344
17276959	17277459	AT1G47056	NA	1	17276102	17277659	0.513723	0.437134	17276959	17277459	AT1G46912	Yes	1	17272520	17273629	1.56021	4.49494	1293	1	17272973	17273473	+	840	interaction26823	3986	41	0.070445	0	17	0.070445	1700	-34.5966	1407	817	-13.796	2400	-44	-0.0374539	0.873068	NA	NA
19906982	19907482	AT1G53350	Yes	1	19903898	19907515	1.12025	1.68397	19906982	19907482	AT1G53330	Yes	1	19896026	19897442	0.819929	0.546841	445	1	19896067	19896567	+	1024	interaction33051	10915	10	0.070445	0.030093	1	0.070445	100	-0.458075	485	890	-13.7565	900	-6	-1.09174	9.53e-12	0.754466	0.0317959
24515453	24515953	AT1G65900	Yes	1	24515836	24518487	0.740246	1.84479	24515453	24515953	AT1G65880	NA	1	24508632	24510742	2.48374	3.05324	160	1	24509481	24509981	+	1480	interaction45390	5972	13	0.070445	1.9e-05	2	0.070445	200	-1.3309	187	1055	-13.7564	1100	-8	-1.34598	5.25e-07	-0.522727	0.767398
23847973	23848473	AT1G64260	Yes	1	23847755	23849915	0.93693	1.05429	23847973	23848473	AT1G64235	Yes	1	23836248	23836620	1.98013	2.98096	707	1	23836407	23836907	+	1156	interaction42803	11566	10	0.070445	0.030834	1	0.070445	100	-0.458107	512	1046	-13.7534	900	-6	-0.158711	0.776026	NA	NA
6984101	6984601	AT1G20135	Yes	1	6984123	6985498	2.03289	3.69494	6984101	6984601	AT1G20132	Yes	1	6981263	6983627	1.59505	2.40178	234	1	6981010	6981510	+	961	interaction13285	3091	13	0.070445	2.1e-05	2	0.070445	200	-1.3309	191	911	-13.751	1100	-8	NA	NA	NA	NA
5376549	5377049	AT1G15630	Yes	1	5376792	5378027	2.27818	2.49801	5376549	5377049	AT1G15600	Yes	1	5368922	5370344	1.90535	2.84668	920	1	5368876	5369376	+	650	interaction11063	7673	10	0.070445	0.030734	1	0.070445	100	-0.458138	939	542	-13.7502	900	-6	-0.21681	0.874604	NA	NA
7430986	7431486	AT2G17070	Yes	2	7430862	7431654	2.20804	4.07808	7430986	7431486	AT2G17060	Yes	2	7422410	7426877	1.7678	2.19858	258	2	7422470	7422970	+	744	interaction63551	8516	13	0.070445	2.2e-05	2	0.070445	200	-1.3309	200	786	-13.7396	1100	-8	0.28908	0.728012	-0.178325	0.730901
19014958	19015458	AT1G51300	NA	1	19014259	19016103	4.24229	5.80783	19014958	19015458	AT1G51210	Yes	1	18987808	18989110	1.04796	7.51962	1491	1	18988492	18988992	+	932	interaction30403	26466	10	0.070445	0.031124	1	0.070445	100	-0.458327	1302	835	-13.7317	900	-6	-0.214225	NA	NA	NA
19007571	19008071	AT1G51270	NA	1	19007509	19011272	2.82793	4.42619	19007571	19008071	AT1G51220	Yes	1	18989750	18992149	3.34167	6.05422	1370	1	18991466	18991966	+	1299	interaction30267	16105	11	0.086571	0.00325	1	0.081752	86.1681	-0.45843	1334	1185	-13.7216	808.929	-6	0.459494	0.0215605	1.53702	NA
13890482	13890982	AT2G32750	NA	2	13889640	13891170	0.580735	0.588615	13890482	13890982	AT2G32740	NA	2	13886825	13888232	0.910271	0.477794	178	2	13887001	13887501	+	1058	interaction76672	3481	33	0.070445	0	13	0.070445	1300	-24.0504	121	1041	-13.7213	2000	-34	-0.275251	0.762233	0.442804	0.675851
11395018	11395518	AT1G31790	NA	1	11394689	11396018	0.718011	0.355756	11395018	11395518	AT1G31780	NA	1	11391226	11394748	0.630594	0.36167	107	1	11393345	11393845	+	441	interaction22806	1673	21	0.070445	0	6	0.070445	600	-7.57672	72	333	-13.6908	1500	-18	0.350359	0.179778	0.360932	0.0144412
3061387	3061887	AT1G09483	NA	1	3060991	3061729	2.88965	2.9055	3061387	3061887	AT1G09480	NA	1	3057974	3060661	1.25299	1.45673	1184	1	3059121	3059621	+	158	interaction5776	2266	33	0.070445	0	13	0.070445	1300	-24.0407	906	123	-13.6879	2000	-34	-0.589178	NA	1.018	4.65e-06
1921980	1922480	AT1G06290	NA	1	1922351	1926278	0.8405	0.518064	1921980	1922480	AT1G06270	NA	1	1918087	1919760	0.818952	0.456659	100	1	1918459	1918959	+	2000	interaction4297	3521	23	0.070445	0	7	0.070445	700	-9.56977	90	1490	-13.6856	1600	-20	0.281405	0.201752	-0.162716	0.596974
12304131	12304631	AT1G33880	NA	1	12303861	12304911	2.36799	3.31694	12304131	12304631	AT1G33860	Yes	1	12294393	12295305	1.98314	2.30561	1509	1	12294454	12294954	+	451	interaction24153	9677	13	0.070445	2.4e-05	2	0.070445	200	-1.33089	1291	263	-13.6822	1100	-8	0.246771	NA	NA	NA
27134003	27134503	AT1G72125	Yes	1	27134167	27136389	2.04761	3.68583	27134003	27134503	AT1G72100	Yes	1	27127211	27128978	2.71858	2.71377	1766	1	27128503	27129003	+	230	interaction52603	5500	27	0.070445	0	9	0.070445	900	-13.8722	1701	166	-13.6586	1800	-26	0.277001	0.435608	-0.525776	0.689204
19249561	19250061	AT1G51840	NA	1	19249448	19250709	2.68566	3.14685	19249561	19250061	AT1G51823	NA	1	19242293	19242437	1.02688	1.41931	667	1	19242386	19242886	+	389	interaction31140	7175	13	0.070445	2.4e-05	2	0.070445	200	-1.33089	595	320	-13.6501	1100	-8	0.0221962	0.971427	NA	NA
916854	917354	AT1G03680	NA	1	916818	918064	0.852526	0.406073	916854	917354	AT1G03660	Yes	1	911435	911759	0.644324	0.645988	871	1	911537	912037	+	92	interaction1995	5317	15	0.070445	0	3	0.070445	300	-2.54121	736	61	-13.6229	1200	-10	-0.267773	0.0469195	-1.22319	0.0305535
5818091	5818591	AT1G17010	Yes	1	5817566	5819352	1.93481	3.61386	5818091	5818591	AT1G17000	Yes	1	5812727	5816662	1.51032	2.09837	91	1	5812561	5813061	+	1472	interaction11641	5530	15	0.070445	0	3	0.070445	300	-2.54121	61	1296	-13.6229	1200	-10	-1.10465	NA	1.73974	NA
17813483	17813983	AT2G42810	NA	2	17811934	17816692	0.750446	0.411846	17813483	17813983	AT2G42800	Yes	2	17807941	17809590	0.833229	4.06748	151	2	17809018	17809518	+	1602	interaction85259	4465	23	0.070445	0	7	0.070445	700	-9.56204	94	1404	-13.6183	1600	-20	0.135005	0.351096	-0.166528	0.740305
2633027	2633527	AT1G08350	NA	1	2632809	2635852	0.623054	0.405307	2633027	2633527	AT1G08340	Yes	1	2631067	2632871	0.732828	1.45335	247	1	2631882	2632382	+	1141	interaction5136	1145	27	0.070445	0	9	0.070445	900	-13.8602	178	865	-13.591	1800	-26	0.185549	0.197488	-0.142616	0.600273
11724621	11725121	AT2G27410	Yes	2	11724426	11725419	0.772795	2.46735	11724621	11725121	AT2G27385	NA	2	11716000	11717432	1.41816	1.79032	82	2	11716942	11717442	+	2062	interaction70928	7679	17	0.070445	0	4	0.070445	400	-4.02138	58	1982	-13.5767	1300	-14	-1.17601	NA	-0.599259	0.00225195
1741556	1742056	AT1G05800	NA	1	1741203	1742619	5.27871	6.09686	1741556	1742056	AT1G05785	NA	1	1730248	1732626	0.579905	0.486737	115	1	1730942	1731442	+	2091	interaction3850	10614	23	0.070445	0	7	0.070445	700	-9.55668	97	1750	-13.572	1600	-20	0.601712	NA	-0.0336275	0.887314
20423088	20423588	AT1G54720	NA	1	20422830	20423754	1.42441	1.53604	20423088	20423588	AT1G54710	NA	1	20416769	20421035	0.723737	0.43673	1014	1	20420045	20420545	+	207	interaction34513	3043	27	0.070445	0	9	0.070445	900	-13.8481	707	192	-13.5236	1800	-26	0.927376	NA	0.0518682	0.788226
27651105	27651605	AT1G73570	NA	1	27650991	27653942	0.722306	0.518639	27651105	27651605	AT1G73510	NA	1	27642385	27643189	2.13531	1.66944	1690	1	27642948	27643448	+	73	interaction53528	8157	15	0.070445	0	3	0.070445	300	-2.53945	1734	67	-13.5204	1200	-10	-0.159395	0.40617	0.354631	NA
29899033	29899533	AT1G79480	NA	1	29897726	29899604	0.711826	0.539006	29899033	29899533	AT1G79470	NA	1	29894597	29897166	0.957375	0.550992	1402	1	29895045	29895545	+	93	interaction58210	3988	15	0.070445	0	3	0.070445	300	-2.53893	1297	69	-13.4906	1200	-10	-0.0964216	0.873133	-0.127209	0.451571
1080644	1081144	AT2G03560	Yes	2	1079638	1081376	2.04071	2.58345	1080644	1081144	AT2G03530	NA	2	1071593	1073566	0.720768	0.71707	1254	2	1073453	1073953	+	109	interaction60253	7191	15	0.070445	0	3	0.070445	300	-2.53821	1128	72	-13.4493	1200	-10	1.5188	NA	-1.66521	2.47e-12
14728547	14729047	AT2G34920	Yes	2	14728026	14731156	0.532909	2.84558	14728547	14729047	AT2G34890	Yes	2	14718194	14721271	0.646889	1.12447	123	2	14720571	14721071	+	1211	interaction78787	7976	15	0.070445	0	3	0.070445	300	-2.53694	78	946	-13.3772	1200	-10	-1.23341	3.2e-09	NA	NA
10670554	10671054	AT1G30290	NA	1	10670319	10672740	0.575534	0.299262	10670554	10671054	AT1G30270	NA	1	10654856	10658897	0.920736	1.15343	112	1	10655135	10655635	+	1601	interaction21558	15419	15	0.070445	0	3	0.070445	300	-2.53637	81	1644	-13.3455	1200	-10	-0.0153158	0.951986	0.178491	0.199345
11246983	11247483	AT1G31410	NA	1	11246913	11249359	0.579761	0.400277	11246983	11247483	AT1G31380	NA	1	11240450	11241099	1.50958	0.906521	170	1	11240659	11241159	+	1547	interaction22315	6324	23	0.070445	0	7	0.070445	700	-9.52933	116	1073	-13.3408	1600	-20	0.0271782	0.867523	NA	NA
23614533	23615033	AT1G63680	NA	1	23614436	23617767	0.607089	0.406729	23614533	23615033	AT1G63670	NA	1	23607421	23610653	0.750225	0.477189	1570	1	23608989	23609489	+	108	interaction42165	5544	17	0.070445	0	4	0.070445	400	-4.01198	1614	69	-13.3334	1300	-14	0.00868149	0.970987	-0.253172	0.192336
2208991	2209491	AT1G07200	NA	1	2208718	2212546	0.698659	0.399951	2208991	2209491	AT1G07180	Yes	1	2204319	2206934	0.620056	0.990895	128	1	2204479	2204979	+	2070	interaction4538	4512	39	0.070445	0	18	0.070445	1800	-38.886	95	1979	-13.3286	2100	-44	-0.0280064	0.908102	-0.902701	0.000310992
5821003	5821503	AT1G17020	Yes	1	5820205	5822013	0.879888	3.67389	5821003	5821503	AT1G16980	NA	1	5807310	5811488	1.46939	1.58897	122	1	5807097	5807597	+	1548	interaction11653	13906	15	0.070445	0	3	0.070445	300	-2.53568	85	1318	-13.307	1200	-10	-1.43876	2.04e-09	-1.17601	NA
244615	245115	AT1G01670	Yes	1	242842	245988	1.76909	5.60856	244615	245115	AT1G01660	Yes	1	240056	242608	0.840335	2.66747	188	1	242004	242504	+	1879	interaction510	2611	52	0.070445	0	27	0.070445	2700	-68.0998	136	1387	-13.2788	2500	-64	-8.965	9.47e-12	-2.25236	1.15e-09
24284917	24285417	AT1G65370	Yes	1	24284468	24286145	1.35643	5.12686	24284917	24285417	AT1G65360	Yes	1	24281336	24282151	1.71668	1.78243	805	1	24281483	24281983	+	1747	interaction44178	3434	34	0.070445	0	13	0.070445	1300	-23.5868	618	1379	-13.266	2100	-34	-3.89923	1.05e-72	0.747547	NA
22123427	22123927	AT1G60050	Yes	1	22121549	22123702	3.30107	4.80111	22123427	22123927	AT1G60040	Yes	1	22119074	22119929	2.59868	8.83191	1710	1	22118941	22119441	+	494	interaction38665	4486	40	0.070445	0	17	0.070445	1700	-34.7578	1392	395	-13.2373	2300	-44	0.00750858	0.995384	-1.17601	NA
26410534	26411034	AT1G70130	Yes	1	26409742	26411801	0.677221	2.59635	26410534	26411034	AT1G70110	Yes	1	26406237	26408323	0.682047	0.756937	472	1	26407154	26407654	+	1505	interaction50859	3380	32	0.070445	0	12	0.070445	1200	-21.0927	304	1234	-13.2158	2000	-32	-2.67974	NA	-2.42891	0.0149705
1726020	1726520	AT2G04920	NA	2	1726137	1727268	1.15126	0.909708	1726020	1726520	AT2G04880	NA	2	1717887	1720526	0.588631	0.426097	1800	2	1719521	1720021	+	42	interaction61129	6499	14	0.070445	0	3	0.070445	300	-2.56517	1440	28	-13.1633	1100	-10	NA	NA	-0.197479	0.21054
591390	591890	AT1G02720	NA	1	591825	594236	0.611206	0.389329	591390	591890	AT1G02690	NA	1	584259	587219	0.59636	0.43043	941	1	584427	584927	+	156	interaction1284	6963	15	0.070445	0	3	0.070445	300	-2.53147	912	122	-13.0776	1200	-10	0.14201	0.3228	-0.0657563	0.736641
14446037	14446537	AT2G34210	Yes	2	14445937	14450522	1.16228	1.74944	14446037	14446537	AT2G34208	NA	2	14444996	14445114	3.23475	5.12669	1249	2	14444999	14445499	+	238	interaction77859	1038	53	0.070445	0	27	0.070445	2700	-67.1378	1057	211	-13.0507	2600	-64	-0.431997	0.708634	NA	NA
20375856	20376356	AT1G54560	Yes	1	20371648	20379745	0.782009	0.636355	20375856	20376356	AT1G54550	Yes	1	20369650	20370986	2.83136	2.56131	245	1	20369972	20370472	+	1299	interaction34312	5884	28	0.070445	0	10	0.070445	1000	-16.2659	146	1070	-13.0288	1800	-26	0.261952	0.893095	NA	NA
23400465	23400965	AT1G63100	Yes	1	23399390	23401367	0.715839	0.854654	23400465	23400965	AT1G63060	NA	1	23384042	23385042	2.66097	2.68134	165	1	23384552	23385052	+	1534	interaction41833	15913	19	0.070445	0	5	0.070445	500	-5.67586	98	1266	-13.0267	1400	-16	-0.595037	0.0203811	NA	NA
30343953	30344453	AT1G80740	Yes	1	30342393	30347048	0.899736	1.41277	30343953	30344453	AT1G80730	Yes	1	30339322	30340247	2.39099	4.3471	94	1	30340021	30340521	+	1179	interaction58684	3932	22	0.070445	0	7	0.070445	700	-9.65306	62	1125	-13.001	1500	-20	-1.95035	0.262161	0.253606	0.67404
12369498	12369998	AT2G28830	NA	2	12366747	12370684	0.931674	0.987155	12369498	12369998	AT2G28810	NA	2	12363425	12365377	5.07737	7.97081	798	2	12363442	12363942	+	179	interaction72176	6056	15	0.070445	0	3	0.070445	300	-2.52953	914	153	-12.9747	1200	-10	-0.0577765	0.792234	-0.266562	0.202499
19026366	19026866	AT1G51320	NA	1	19025641	19026769	1.25242	0.792199	19026366	19026866	AT1G51310	NA	1	19018978	19021804	0.64933	0.403026	1534	1	19019112	19019612	+	239	interaction30539	7254	15	0.070445	0	3	0.070445	300	-2.52924	1240	159	-12.9596	1200	-10	NA	NA	0.372728	0.0355299
25835932	25836432	AT1G68790	NA	1	25834708	25839319	0.72099	0.43496	25835932	25836432	AT1G68780	NA	1	25831802	25833844	0.695649	0.730167	199	1	25833423	25833923	+	1814	interaction49582	2509	37	0.070445	0	16	0.070445	1600	-32.3431	150	1708	-12.8945	2100	-40	0.0644447	0.683633	-0.391623	0.0922518
4450900	4451400	AT1G13050	NA	1	4450237	4451742	0.580569	0.359125	4450900	4451400	AT1G13040	NA	1	4447646	4449200	0.62978	0.403305	247	1	4447996	4448496	+	2059	interaction8890	2904	50	0.070445	0	25	0.070445	2500	-60.4117	200	1540	-12.8761	2500	-60	0.308876	0.140812	0.393369	0.029208
20386599	20387099	AT1G54575	NA	1	20387059	20387710	2.22026	1.97929	20386599	20387099	AT1G54570	NA	1	20380477	20385125	0.693693	0.468135	1105	1	20381534	20382034	+	173	interaction34448	5065	17	0.070445	0	4	0.070445	400	-3.99246	952	115	-12.8585	1300	-12	-0.409523	0.0304627	-0.0608254	0.78766
26205571	26206071	AT1G69680	NA	1	26204804	26206928	0.777228	0.609366	26205571	26206071	AT1G69660	NA	1	26199622	26200603	2.37696	2.75999	1620	1	26200404	26200904	+	249	interaction50325	5167	15	0.070445	0	3	0.070445	300	-2.52675	1530	241	-12.8308	1200	-10	0.0212989	0.932233	0.760588	NA
6525142	6525642	AT1G18890	Yes	1	6522763	6525962	0.710159	0.470639	6525142	6525642	AT1G18870	Yes	1	6515428	6519282	0.729608	0.735246	1624	1	6517476	6517976	+	73	interaction12592	7666	18	0.070445	0	5	0.070445	500	-5.76405	1638	43	-12.8214	1300	-14	0.480339	0.041197	-1.06926	0.00298509
17072980	17073480	AT2G40920	Yes	2	17072463	17074164	0.645143	0.586427	17072980	17073480	AT2G40910	Yes	2	17069867	17071657	1.75589	2.29349	249	2	17071004	17071504	+	1434	interaction83227	1976	55	0.070445	0	29	0.070445	2900	-74.3187	191	1371	-12.7812	2600	-68	-0.082003	0.557872	-0.377581	0.816421
7033543	7034043	AT2G16225	NA	2	7033939	7034317	2.48024	2.23888	7033543	7034043	AT2G16220	Yes	2	7030154	7031378	2.45484	4.55687	470	2	7030963	7031463	+	1371	interaction62856	2580	44	0.070445	0	20	0.070445	2000	-43.6905	432	1261	-12.7706	2400	-50	NA	NA	NA	NA
10752520	10753020	AT2G25240	Yes	2	10751767	10753134	1.71162	1.77345	10752520	10753020	AT2G25230	NA	2	10747210	10748467	1.62082	1.79832	68	2	10747547	10748047	+	815	interaction69375	4973	12	0.070445	0.00015	2	0.070445	200	-1.33097	40	799	-12.7454	1000	-8	-0.0239935	0.972591	1.5188	NA
14510460	14510960	AT2G34370	NA	2	14510481	14511891	2.34583	3.28578	14510460	14510960	AT2G34360	NA	2	14507293	14510231	2.91557	3.91581	1414	2	14507331	14507831	+	550	interaction78185	3129	15	0.070445	0	3	0.070445	300	-2.52494	1118	387	-12.7389	1200	-10	-0.862446	NA	0.89012	0.201979
8878013	8878513	AT1G25320	NA	1	8877856	8880310	0.931833	0.486092	8878013	8878513	AT1G25275	NA	1	8860670	8861364	0.620481	0.28136	1740	1	8860928	8861428	+	1334	interaction17478	17085	15	0.112913	0	4	0.135593	207.812	-3.96602	1556	1685	-12.6896	728.01	-10	0.280395	0.0690669	1.25847	1.06e-08
19007996	19008496	AT1G51270	NA	1	19007509	19011272	2.82793	4.42619	19007996	19008496	AT1G51210	Yes	1	18987808	18989110	1.04796	7.51962	1343	1	18988061	18988561	+	917	interaction30280	19935	15	0.070445	0	3	0.070445	300	-2.52375	1127	644	-12.6793	1200	-10	0.459494	0.0215605	NA	NA
24672500	24673000	AT1G66220	NA	1	24670535	24673661	3.4575	4.87606	24672500	24673000	AT1G66210	NA	1	24665628	24668783	1.77801	1.99649	189	1	24668393	24668893	+	918	interaction46030	4107	19	0.070445	0	5	0.070445	500	-5.6517	154	678	-12.6785	1400	-16	NA	NA	NA	NA
29610463	29610963	AT1G78740	NA	1	29610493	29611492	2.64825	3.67019	29610463	29610963	AT1G78720	Yes	1	29605628	29607510	1.80511	3.80567	281	1	29606015	29606515	+	1565	interaction57534	4448	28	0.070445	0	10	0.070445	1000	-16.1831	214	1148	-12.6613	1800	-26	0.747547	NA	-2.50936	4.67e-09
17832418	17832918	AT2G42850	Yes	2	17831654	17833432	0.757918	0.73674	17832418	17832918	AT2G42830	Yes	2	17820254	17824013	2.63629	4.52922	1395	2	17820451	17820951	+	1613	interaction85390	11967	21	0.109458	0	3	0.075513	279.862	-2.52311	1007	1450	-12.6473	1071.64	-18	-0.355725	0.43141	0.616937	0.543864
19400519	19401019	AT1G52130	NA	1	19400618	19402363	3.58383	5.00054	19400519	19401019	AT1G52100	NA	1	19383121	19385602	2.29966	2.9373	62	1	19385091	19385591	+	1754	interaction31891	15428	12	0.070445	0.000137	2	0.070445	200	-1.33095	46	1725	-12.5922	1000	-8	1.44975	0.361901	1.36521	3.02e-14
3876497	3876997	AT1G11540	Yes	1	3875441	3877155	0.755185	1.20886	3876497	3876997	AT1G11490	Yes	1	3868883	3870065	0.901403	3.02882	231	1	3869488	3869988	+	1617	interaction7318	7009	17	0.070445	0	4	0.070445	400	-3.97999	203	1048	-12.5741	1300	-12	-0.027721	0.962456	-0.565999	0.505816
25012034	25012534	AT1G67020	Yes	1	25011007	25012987	0.546823	1.12409	25012034	25012534	AT1G67000	Yes	1	25004108	25007647	1.68115	4.15254	1083	1	25007065	25007565	+	1508	interaction47813	4969	39	0.079446	0	14	0.070445	1400	-26.2079	924	1192	-12.5702	2058.14	-42	-0.0717503	0.952573	-0.383484	0.71082
12103885	12104385	AT2G28340	NA	2	12103671	12106172	3.33633	4.58599	12103885	12104385	AT2G28320	NA	2	12094745	12099644	0.66223	0.394744	1658	2	12096101	12096601	+	63	interaction71800	7784	12	0.070445	0.000139	2	0.070445	200	-1.33095	1293	48	-12.5507	1000	-8	2.17083	0.153748	-0.595394	1.34e-06
1640014	1640514	AT1G05540	Yes	1	1639285	1640811	0.897046	2.3403	1640014	1640514	AT1G05520	Yes	1	1630899	1635711	0.775409	0.475287	1748	1	1635443	1635943	+	410	interaction3394	4571	23	0.070445	0	7	0.070445	700	-9.4277	1348	455	-12.549	1600	-20	-1.62535	2.47e-07	0.291117	0.0241334
27982985	27983485	AT1G74450	NA	1	27982508	27984280	0.614428	0.436464	27982985	27983485	AT1G74430	Yes	1	27975178	27977434	0.709997	0.846082	244	1	27975128	27975628	+	1844	interaction54192	7857	19	0.070445	0	5	0.070445	500	-5.6379	230	1780	-12.4884	1400	-16	-0.0791437	0.825791	-1.04945	0.00534822
19129651	19130151	AT1G51590	NA	1	19128143	19132318	0.636196	0.409286	19129651	19130151	AT1G51580	NA	1	19125582	19128161	0.705799	0.328977	54	1	19126096	19126596	+	1956	interaction30820	3555	22	0.070445	0	8	0.070445	800	-12.1397	36	1555	-12.4859	1400	-20	0.119825	0.350167	0.230058	0.203315
1064410	1064910	AT2G03505	Yes	2	1064235	1065372	0.824789	3.11773	1064410	1064910	AT2G03480	NA	2	1050841	1054613	0.634352	0.430851	1578	2	1052477	1052977	+	74	interaction60125	11933	12	0.070445	0.000161	2	0.070445	200	-1.33094	1394	52	-12.4782	1000	-8	-0.0398169	0.945329	0.050361	0.827745
12479045	12479545	AT2G29050	NA	2	12478145	12480372	0.702694	0.507306	12479045	12479545	AT2G29040	Yes	2	12472424	12474962	1.01726	2.00919	1007	2	12474479	12474979	+	333	interaction72624	4566	19	0.070445	0	5	0.070445	500	-5.6362	741	245	-12.4654	1400	-16	0.00744631	0.974157	NA	NA
25018438	25018938	AT1G67035	NA	1	25018076	25019057	0.748312	0.397911	25018438	25018938	AT1G67020	Yes	1	25011007	25012987	0.546823	1.12409	132	1	25012401	25012901	+	1597	interaction47916	6037	24	0.070445	0	8	0.070445	800	-11.6828	113	1445	-12.4634	1600	-22	-0.451446	0.310727	-0.0717503	0.952573
27135513	27136013	AT1G72125	Yes	1	27134167	27136389	2.04761	3.68583	27135513	27136013	AT1G72120	Yes	1	27132096	27133985	0.910615	2.57957	456	1	27131977	27132477	+	1497	interaction52624	3536	45	0.070445	0	21	0.070445	2100	-46.824	396	1566	-12.4568	2400	-52	0.277001	0.435608	0.0551539	0.91267
6364520	6365020	AT2G14830	NA	2	6362480	6365818	0.760855	0.583642	6364520	6365020	AT2G14810	Yes	2	6357464	6358470	0.863194	1.25618	47	2	6358111	6358611	+	773	interaction62369	6409	9	0.070445	0.168616	1	0.070445	100	-0.447365	26	741	-12.4268	800	-4	0.747547	NA	NA	NA
3403409	3403909	AT1G10385	Yes	1	3403223	3405856	1.43369	4.59588	3403409	3403909	AT1G10370	NA	1	3397080	3398358	0.952781	0.651697	505	1	3397929	3398429	+	374	interaction6368	5480	17	0.070445	0	4	0.070445	400	-3.97268	371	431	-12.4139	1300	-12	-0.69375	0.631936	-1.06247	0.000174981
26457551	26458051	AT1G70260	NA	1	26456843	26459450	4.32706	7.29553	26457551	26458051	AT1G70250	NA	1	26452964	26456088	2.01264	2.94965	137	1	26453458	26453958	+	932	interaction51191	4093	27	0.070445	0	10	0.070445	1000	-16.3884	100	884	-12.4046	1700	-26	-3.75778	1.03e-25	-1.03849	1.4e-10
21395415	21395915	AT1G57770	NA	1	21395195	21398280	0.82513	0.830778	21395415	21395915	AT1G57760	NA	1	21390002	21390565	0.962214	0.438747	1348	1	21390045	21390545	+	106	interaction36733	5370	12	0.070445	0.000201	2	0.070445	200	-1.33093	1201	57	-12.4033	1000	-8	-0.457451	0.0471768	NA	NA
4051412	4051912	AT1G12000	Yes	1	4049895	4053835	0.716315	0.508367	4051412	4051912	AT1G11990	Yes	1	4046245	4049060	1.36658	3.16093	164	1	4048022	4048522	+	1632	interaction7750	3390	39	0.070445	0	18	0.070445	1800	-38.4473	130	1301	-12.3996	2100	-44	-0.122703	0.45956	-2.28766	0.00251449
13814520	13815020	AT2G32540	NA	2	13814685	13818289	2.03026	2.03795	13814520	13815020	AT2G32530	NA	2	13809215	13813570	1.59855	1.52814	1009	2	13810370	13810870	+	534	interaction76359	4150	17	0.070445	0	4	0.070445	400	-3.97114	1008	450	-12.3807	1300	-12	-0.584263	0.000100646	-1.55147	2.59e-16
9347526	9348026	AT2G21930	NA	2	9347640	9349128	5.01622	8.96659	9347526	9348026	AT2G21910	NA	2	9341497	9343030	2.03509	2.69494	1380	2	9341998	9342498	+	640	interaction67282	5528	17	0.070445	0	4	0.070445	400	-3.97071	1220	479	-12.3713	1300	-12	0.600882	NA	-1.17601	NA
9899977	9900477	AT2G23260	Yes	2	9899926	9901439	2.29225	3.41955	9899977	9900477	AT2G23240	Yes	2	9895854	9896325	2.13204	4.71818	121	2	9895648	9896148	+	809	interaction68063	4329	25	0.070445	0	9	0.070445	900	-14.089	76	743	-12.363	1600	-24	-1.17601	NA	-0.882732	NA
5891431	5891931	AT1G17230	NA	1	5891323	5895075	0.672835	0.337984	5891431	5891931	AT1G17190	NA	1	5875349	5876545	1.75624	2.43386	92	1	5875400	5875900	+	1571	interaction11903	16031	12	0.070445	0.000186	2	0.070445	200	-1.33092	64	1479	-12.3198	1000	-8	0.765287	3.4e-05	-0.503147	0.0364215
30335982	30336482	AT1G80720	NA	1	30336137	30337565	0.732161	0.407195	30335982	30336482	AT1G80680	NA	1	30324007	30328769	0.697261	0.451039	852	1	30326522	30327022	+	70	interaction58613	9460	9	0.070445	0.206932	1	0.070445	100	-0.448546	935	29	-12.3171	800	-4	0.412701	0.037211	0.256344	0.0315702
9321858	9322358	AT2G21870	NA	2	9320194	9322734	0.797016	0.396593	9321858	9322358	AT2G21860	NA	2	9318257	9320002	0.742372	0.317784	1387	2	9319007	9319507	+	182	interaction66961	2851	32	0.070445	0	13	0.070445	1300	-23.949	1569	146	-12.3143	1900	-32	-0.061124	0.628957	-0.524555	8.14e-06
7441433	7441933	AT1G21250	Yes	1	7439265	7442113	0.717878	5.04995	7441433	7441933	AT1G21230	Yes	1	7429979	7432346	0.50445	0.749503	99	1	7430602	7431102	+	1611	interaction14297	10831	12	0.070445	0.000194	2	0.070445	200	-1.33092	65	1008	-12.3094	1000	-8	-1.15486	0.156137	-0.927011	NA
16250030	16250530	AT2G38920	Yes	2	16248145	16251002	3.81129	6.5521	16250030	16250530	AT2G38910	Yes	2	16245213	16247483	1.3654	3.98672	1675	2	16246514	16247014	+	490	interaction81601	3516	46	0.070445	0	22	0.070445	2200	-50.1077	1401	317	-12.3039	2400	-52	-0.0318761	0.98901	NA	NA
22500048	22500548	AT1G61090	Yes	1	22499316	22500331	1.3809	4.08671	22500048	22500548	AT1G61065	Yes	1	22490243	22491461	0.788581	0.581365	1708	1	22490460	22490960	+	814	interaction39487	9588	17	0.070445	0	4	0.070445	400	-3.96746	1115	918	-12.3021	1300	-12	NA	NA	-0.235166	0.418118
3693391	3693891	AT1G11070	Yes	1	3690211	3693648	0.751842	0.666597	3693391	3693891	AT1G11050	Yes	1	3681887	3684169	0.642865	0.489119	1647	1	3682933	3683433	+	89	interaction6826	10458	12	0.070445	0.000183	2	0.070445	200	-1.33092	1473	67	-12.2897	1000	-8	-0.123729	0.716452	-0.0566656	0.814295
24857900	24858400	AT1G66640	NA	1	24857437	24859011	2.36342	3.37927	24857900	24858400	AT1G66630	NA	1	24855285	24856714	2.73747	3.74086	642	1	24856457	24856957	+	231	interaction47101	1443	29	0.070445	0	11	0.070445	1100	-18.713	387	157	-12.2824	1800	-28	NA	NA	NA	NA
19007486	19007986	AT1G51270	NA	1	19007509	19011272	2.82793	4.42619	19007486	19007986	AT1G51260	NA	1	19003375	19005641	1.96509	3.64602	1370	1	19004991	19005491	+	1417	interaction30276	2495	26	0.094435	0	6	0.075061	563.102	-7.43783	1334	1088	-12.2574	1376.4	-24	0.459494	0.0215605	-0.312884	0.774833
8630000	8630500	AT1G24320	NA	1	8626314	8630971	0.606276	0.369269	8630000	8630500	AT1G24300	NA	1	8614364	8620420	0.695354	0.358479	999	1	8619010	8619510	+	38	interaction17064	10990	9	0.070445	0.142637	1	0.070445	100	-0.449205	923	31	-12.2572	800	-4	0.457184	0.229594	0.141144	0.395713
16456116	16456616	AT2G39410	Yes	2	16455568	16458217	2.91276	6.38934	16456116	16456616	AT2G39380	NA	2	16447005	16449083	0.617259	0.372583	1425	2	16448060	16448560	+	125	interaction81837	8056	12	0.070445	0.000216	2	0.070445	200	-1.33092	1216	71	-12.254	1000	-8	-0.0265475	0.951226	0.180824	0.492428
18925572	18926072	AT1G51055	Yes	1	18925285	18926315	1.0184	0.960854	18925572	18926072	AT1G51040	Yes	1	18920657	18923314	1.60993	3.4402	180	1	18920989	18921489	+	1640	interaction29958	4583	27	0.070445	0	10	0.070445	1000	-16.3527	110	1404	-12.2504	1700	-26	-0.62864	0.506549	-1.37949	NA
8699540	8700040	AT1G24540	Yes	1	8699750	8701421	1.4755	1.98881	8699540	8700040	AT1G24490	NA	1	8682233	8685271	0.678453	0.523058	925	1	8684457	8684957	+	46	interaction17272	15083	9	0.070445	0.166144	1	0.070445	100	-0.449784	793	33	-12.2055	800	-4	-0.381936	0.792122	0.0887456	0.544453
26203001	26203501	AT1G69670	NA	1	26202030	26204442	0.789564	0.515199	26203001	26203501	AT1G69660	NA	1	26199622	26200603	2.37696	2.75999	222	1	26199891	26200391	+	1728	interaction50267	3110	29	0.070445	0	11	0.070445	1100	-18.6897	170	1333	-12.1978	1800	-28	0.0149467	0.940992	0.760588	NA
21485399	21485899	AT1G58050	NA	1	21478589	21487839	1.18862	1.44738	21485399	21485899	AT1G58037	Yes	1	21472964	21474602	1.83489	1.922	80	1	21474456	21474956	+	1214	interaction36957	10943	9	0.070445	0.215973	1	0.070445	100	-0.450296	35	947	-12.1602	800	-4	-1.17601	NA	0.104543	0.901423
19333526	19334026	AT1G52000	NA	1	19333158	19336115	0.874646	0.89439	19333526	19334026	AT1G51990	NA	1	19330948	19332667	0.993998	0.818031	203	1	19330942	19331442	+	1584	interaction31661	2584	51	0.070445	0	27	0.070445	2700	-67.7774	154	1343	-12.1579	2400	-62	0.499133	0.618978	NA	NA
9973162	9973662	AT1G28400	NA	1	9972383	9973793	2.36669	2.18114	9973162	9973662	AT1G28390	NA	1	9966185	9968301	1.43757	1.18834	54	1	9967287	9967787	+	861	interaction19551	5875	9	0.070445	0.183743	1	0.070445	100	-0.450752	37	781	-12.1204	800	-4	-0.223117	0.175612	0.0423593	0.844704
24423891	24424391	AT1G65670	NA	1	24421992	24423953	1.52919	1.48264	24423891	24424391	AT1G65660	NA	1	24418106	24421292	0.674025	0.347727	657	1	24418910	24419410	+	141	interaction44735	4981	12	0.070445	0.000225	2	0.070445	200	-1.33091	559	93	-12.1152	1000	-8	-0.0877438	NA	0.148583	0.325048
23400458	23400958	AT1G63100	Yes	1	23399390	23401367	0.715839	0.854654	23400458	23400958	AT1G63070	NA	1	23385323	23387167	2.21823	3.77694	165	1	23386629	23387129	+	902	interaction41835	13829	12	0.070445	0.000237	2	0.070445	200	-1.33091	98	662	-12.0929	1000	-8	-0.595037	0.0203811	2.23871	NA
23225953	23226453	AT1G62710	NA	1	23223873	23226916	1.83816	2.30762	23225953	23226453	AT1G62700	NA	1	23216217	23217916	4.37009	7.68498	1258	1	23217553	23218053	+	106	interaction41323	8400	12	0.070445	0.000201	2	0.070445	200	-1.33091	969	102	-12.0766	1000	-8	-0.818582	0.0035433	-0.0557997	0.934213
11558961	11559461	AT1G32130	NA	1	11558860	11561920	0.697908	0.455212	11558961	11559461	AT1G32080	NA	1	11537341	11539800	0.749719	0.591656	125	1	11539019	11539519	+	2031	interaction23299	19942	12	0.070445	0.000216	2	0.070445	200	-1.3309	103	1683	-12.0728	1000	-8	0.127478	0.347588	-0.625134	9.43e-06
20028469	20028969	AT1G53645	NA	1	20026146	20028635	0.881676	0.5204	20028469	20028969	AT1G53590	NA	1	19996314	20000265	0.635224	0.447849	1853	1	19999037	19999537	+	85	interaction33308	29432	9	0.070445	0.219573	1	0.070445	100	-0.451351	1957	40	-12.0688	800	-4	0.313637	0.0096696	-0.00950391	0.971848
21729470	21729970	AT1G58520	NA	1	21729912	21738652	0.632696	0.412236	21729470	21729970	AT1G58440	NA	1	21713841	21717290	0.650639	0.414833	93	1	21716448	21716948	+	1746	interaction37578	13022	9	0.070445	0.224354	1	0.070445	100	-0.451351	40	1544	-12.0688	800	-4	-2.09505	1.67e-24	0.317639	0.0505904
16250029	16250529	AT2G38920	Yes	2	16248145	16251002	3.81129	6.5521	16250029	16250529	AT2G38880	NA	2	16238475	16240834	0.743055	0.536762	1675	2	16238590	16239090	+	1629	interaction81588	11439	28	0.132732	0	10	0.130563	539.545	-16.036	1401	1802	-12.0568	946.491	-26	-0.0318761	0.98901	-0.0133836	0.945577
24836521	24837021	AT1G66570	Yes	1	24835250	24837322	1.13473	1.94269	24836521	24837021	AT1G66550	Yes	1	24828501	24829639	0.508241	2.23519	192	1	24829035	24829535	+	673	interaction47067	7486	12	0.070445	0.000247	2	0.070445	200	-1.3309	108	663	-12.0546	1000	-8	-0.122834	0.945241	-2.09711	NA
4045640	4046140	AT1G11980	Yes	1	4045618	4045855	1.7386	2.102	4045640	4046140	AT1G11960	NA	1	4039710	4043880	0.745743	0.456478	1637	1	4040959	4041459	+	75	interaction7670	4681	9	0.070445	0.211849	1	0.070445	100	-0.45153	1428	41	-12.0534	800	-4	NA	NA	0.673986	1.57e-05
12222976	12223476	AT1G33720	NA	1	12220896	12224000	1.80335	2.34786	12222976	12223476	AT1G33680	Yes	1	12203944	12208698	0.596042	0.403551	1472	1	12206485	12206985	+	65	interaction23838	16491	9	0.070445	0.2011	1	0.070445	100	-0.451702	1049	42	-12.0388	800	-4	0.345648	0.0558122	0.207718	0.193809
19126046	19126546	AT1G51580	NA	1	19125582	19128161	0.705799	0.328977	19126046	19126546	AT1G51550	NA	1	19117031	19119371	0.629449	0.359214	1956	1	19117995	19118495	+	73	interaction30791	8051	9	0.070445	0.210056	1	0.070445	100	-0.451702	1555	42	-12.0388	800	-4	0.230058	0.203315	-0.0372721	0.860068
6998961	6999461	AT1G20190	Yes	1	6998488	6999817	0.636893	1.40031	6998961	6999461	AT1G20150	Yes	1	6987331	6990361	0.667106	1.85089	1956	1	6987516	6988016	+	160	interaction13420	11445	12	0.070445	0.000235	2	0.070445	200	-1.3309	1978	116	-12.029	1000	-8	-2.05694	1.04e-16	-1.8409	NA
7389046	7389546	AT2G17000	NA	2	7388892	7392105	0.71042	0.973084	7389046	7389546	AT2G16980	NA	2	7376348	7381103	2.157	2.75207	69	2	7377018	7377518	+	1122	interaction63476	12028	9	0.070445	0.205864	1	0.070445	100	-0.452021	44	1059	-12.0118	800	-4	NA	NA	-0.108386	0.706025
10132077	10132577	AT1G29030	NA	1	10129034	10133961	0.67453	0.450988	10132077	10132577	AT1G29025	NA	1	10124347	10127068	0.73331	0.944657	79	1	10126437	10126937	+	1654	interaction20022	5640	16	0.070445	0	4	0.070445	400	-4.0235	56	1348	-11.99	1200	-12	0.304366	0.0994961	-0.595413	0.0776788
118590	119090	AT2G01200	NA	2	118016	119342	0.481864	0.402056	118590	119090	AT2G01190	NA	2	114974	117640	0.514653	0.328476	175	2	115223	115723	+	570	interaction58932	3367	12	0.070445	0.000241	2	0.070445	200	-1.3309	136	763	-11.9785	1000	-8	1.74772	0.000144753	1.17266	9.39e-09
14794583	14795083	AT2G35100	NA	2	14793650	14795629	0.836567	0.326188	14794583	14795083	AT2G35075	Yes	2	14786681	14789023	0.783201	0.553873	68	2	14787030	14787530	+	1348	interaction78959	7553	18	0.070445	0	5	0.070445	500	-5.7057	68	1030	-11.9753	1300	-14	0.121353	0.43387	-0.244059	0.477637
18179506	18180006	AT1G49160	Yes	1	18179303	18182391	0.708668	4.352	18179506	18180006	AT1G49100	NA	1	18166146	18170105	2.13532	2.92952	172	1	18169010	18169510	+	2019	interaction28543	10496	12	0.070445	0.00024	2	0.070445	200	-1.3309	139	1561	-11.9723	1000	-8	-2.22115	5.05e-26	0.923059	0.603549
23246543	23247043	AT1G62770	NA	1	23245885	23246890	2.10333	2.17709	23246543	23247043	AT1G62740	NA	1	23230955	23233543	0.6401	0.334943	1485	1	23231413	23231913	+	68	interaction41353	15130	9	0.070445	0.204735	1	0.070445	100	-0.452578	1209	48	-11.965	800	-4	0.149883	0.699941	0.13693	0.439989
24863925	24864425	AT1G66670	NA	1	24863784	24865702	0.662914	0.422756	24863925	24864425	AT1G66640	NA	1	24857437	24859011	2.36342	3.37927	140	1	24857506	24858006	+	840	interaction47147	6419	12	0.070445	0.000225	2	0.070445	200	-1.3309	143	558	-11.9643	1000	-8	0.127738	0.457142	NA	NA
16902984	16903484	AT2G40470	NA	2	16902303	16903652	3.5829	6.12333	16902984	16903484	AT2G40460	NA	2	16896906	16901280	0.764579	0.592774	831	2	16900138	16900638	+	151	interaction82816	2846	12	0.070445	0.00023	2	0.070445	200	-1.3309	622	144	-11.9624	1000	-8	-0.163562	0.771116	-1.04734	0.000142562
11716567	11717067	AT1G32450	NA	1	11715149	11719970	1.51313	1.71878	11716567	11717067	AT1G32430	NA	1	11704931	11706325	2.85355	3.5159	77	1	11705589	11706089	+	1708	interaction23474	10978	18	0.070445	0	5	0.070445	500	-5.70427	69	1327	-11.9561	1300	-14	-0.189805	0.512475	NA	NA
17589019	17589519	AT2G42200	NA	2	17587406	17589630	0.479156	0.783958	17589019	17589519	AT2G42190	NA	2	17582868	17584194	0.652784	0.467539	150	2	17582926	17583426	+	1369	interaction84742	6093	12	0.070445	0.00023	2	0.070445	200	-1.3309	149	1229	-11.9533	1000	-8	-1.1233	0.00274978	-0.528411	1.96e-06
23627502	23628002	AT1G63700	NA	1	23624665	23629112	0.789413	0.455946	23627502	23628002	AT1G63680	NA	1	23614436	23617767	0.607089	0.406729	88	1	23614495	23614995	+	1570	interaction42283	13007	9	0.070445	0.221489	1	0.070445	100	-0.452824	50	1614	-11.9446	800	-4	-0.0261338	0.858996	0.00868149	0.970987
15393974	15394474	AT2G36720	NA	2	15393070	15399418	0.853219	0.475441	15393974	15394474	AT2G36710	NA	2	15389465	15391251	0.766982	0.567523	128	2	15391073	15391573	+	1115	interaction80334	2901	20	0.070445	0	6	0.070445	600	-7.54487	91	777	-11.942	1400	-16	0.028902	0.83488	-0.295518	0.88987
20449003	20449503	AT1G54820	NA	1	20447315	20450861	0.79966	0.494965	20449003	20449503	AT1G54780	NA	1	20439433	20441159	0.795778	0.442946	130	1	20440354	20440854	+	958	interaction34730	8649	12	0.070445	0.000219	2	0.070445	200	-1.3309	156	899	-11.9415	1000	-8	-1.25072	3.36e-11	-0.597029	1.24e-08
11539031	11539531	AT1G32080	NA	1	11537341	11539800	0.749719	0.591656	11539031	11539531	AT1G32060	NA	1	11532532	11534639	0.686729	0.48931	2031	1	11532615	11533115	+	146	interaction23089	6416	30	0.070445	0	12	0.070445	1200	-21.3458	1683	131	-11.937	1800	-30	-0.625134	9.43e-06	-0.481858	5.27e-05
4810467	4810967	AT1G14040	NA	1	4810487	4814543	1.12937	1.23661	4810467	4810967	AT1G14010	NA	1	4800168	4801850	0.709498	0.380164	1732	1	4800463	4800963	+	77	interaction9659	10004	9	0.070445	0.213584	1	0.070445	100	-0.45305	1750	52	-11.9259	800	-4	0.146236	0.561492	0.422277	0.00345402
23488959	23489459	AT1G63320	Yes	1	23488883	23489530	1.058	1.87827	23488959	23489459	AT1G63300	Yes	1	23482192	23486220	0.569553	0.431247	344	1	23484601	23485101	+	84	interaction41890	4358	9	0.070445	0.218912	1	0.070445	100	-0.45305	278	52	-11.9259	800	-4	NA	NA	-0.154319	0.451574
25270553	25271053	AT1G67460	Yes	1	25269625	25271861	0.921508	0.843827	25270553	25271053	AT1G67440	NA	1	25263803	25265719	0.663594	0.567694	228	1	25264615	25265115	+	714	interaction48340	5938	12	0.070445	0.000257	2	0.070445	200	-1.3309	171	640	-11.9195	1000	-8	-0.692029	0.111202	-0.38713	0.0233054
10169395	10169895	AT1G29100	NA	1	10169083	10169619	3.53217	5.59449	10169395	10169895	AT1G29090	NA	1	10162982	10164452	3.85361	5.36494	55	1	10163458	10163958	+	637	interaction20105	5937	9	0.070445	0.185633	1	0.070445	100	-0.453156	53	571	-11.9171	800	-4	-0.956538	0.467361	-0.355354	0.907529
21197015	21197515	AT1G56570	NA	1	21195803	21197721	0.59248	0.438972	21197015	21197515	AT1G56550	Yes	1	21185661	21188369	1.57116	4.25881	81	1	21187097	21187597	+	2063	interaction36463	9918	9	0.070445	0.216772	1	0.070445	100	-0.453156	53	1825	-11.9171	800	-4	0.21348	0.298657	-0.298354	0.171866
26229021	26229521	AT1G69730	Yes	1	26228631	26231339	0.777818	0.707893	26229021	26229521	AT1G69680	NA	1	26204804	26206928	0.777228	0.609366	85	1	26205446	26205946	+	1620	interaction50502	23575	9	0.070445	0.219573	1	0.070445	100	-0.453156	53	1530	-11.9171	800	-4	-1.19514	6.1e-10	0.0212989	0.932233
5526034	5526534	AT1G16130	Yes	1	5525490	5528212	0.664942	1.0335	5526034	5526534	AT1G16120	Yes	1	5522638	5524983	0.734435	1.62748	1122	1	5524530	5525030	+	165	interaction11264	1504	27	0.070445	0	10	0.070445	1000	-16.2714	911	143	-11.9129	1700	-26	-0.109805	0.924566	-0.933806	0.0223942
597027	597527	AT1G02730	NA	1	594572	598657	0.481129	0.326565	597027	597527	AT1G02720	NA	1	591825	594236	0.611206	0.389329	200	1	592032	592532	+	1553	interaction1359	4995	40	0.070445	0	19	0.070445	1900	-41.4507	139	1581	-11.9114	2100	-44	-0.609833	0.00128944	0.14201	0.3228
23715039	23715539	AT1G63880	NA	1	23712275	23716124	0.870322	0.68588	23715039	23715539	AT1G63870	Yes	1	23707130	23711901	0.8347	1.01569	689	1	23708928	23709428	+	241	interaction42438	6111	12	0.070445	0.00026	2	0.070445	200	-1.3309	680	180	-11.9081	1000	-8	-0.103189	0.501899	0.351321	0.832066
16247008	16247508	AT2G38910	Yes	2	16245213	16247483	1.3654	3.98672	16247008	16247508	AT2G38905	Yes	2	16244098	16244503	1.88115	2.87585	722	2	16244411	16244911	+	1453	interaction81542	2597	31	0.070445	0	12	0.070445	1200	-21.0004	602	1297	-11.9033	1900	-30	NA	NA	-1.04433	NA
4865454	4865954	AT1G14240	Yes	1	4864901	4868000	2.0031	3.14945	4865454	4865954	AT1G14230	NA	1	4861265	4864094	0.725717	0.565306	926	1	4861053	4861553	+	464	interaction10033	4401	26	0.070445	0	9	0.070445	900	-13.7524	832	521	-11.9017	1700	-24	-0.475739	0.0379675	-0.0712255	0.687453
19204544	19205044	AT1G51780	Yes	1	19204511	19206586	1.10366	1.97436	19204544	19205044	AT1G51760	NA	1	19199418	19201642	0.767274	0.466575	2050	1	19200946	19201446	+	91	interaction30935	3598	16	0.070445	0	4	0.070445	400	-4.01941	1767	60	-11.9009	1200	-12	1.79267	NA	0.627399	0.33147
24398413	24398913	AT1G65620	NA	1	24398142	24400969	4.91499	8.79531	24398413	24398913	AT1G65590	NA	1	24385899	24391207	0.693367	0.392852	1482	1	24389517	24390017	+	89	interaction44606	8896	9	0.070445	0.222089	1	0.070445	100	-0.453358	1407	55	-11.9006	800	-4	-0.494138	0.0401227	-0.183295	0.18429
7365050	7365550	AT2G16960	NA	2	7364682	7368963	2.5512	3.29268	7365050	7365550	AT2G16950	NA	2	7353846	7361202	0.81921	0.483089	930	2	7358454	7358954	+	68	interaction63334	6596	9	0.070445	0.204735	1	0.070445	100	-0.453358	951	55	-11.9006	800	-4	2.23871	NA	-0.0104481	0.95139
23855155	23855655	AT1G64280	NA	1	23852747	23855566	0.691012	0.418316	23855155	23855655	AT1G64255	Yes	1	23844953	23847206	2.81339	4.60374	56	1	23844617	23845117	+	1870	interaction42898	10538	9	0.070445	0.187397	1	0.070445	100	-0.453454	56	1814	-11.8927	800	-4	0.0628029	0.727957	0.747547	NA
7768985	7769485	AT1G22040	NA	1	7767923	7770055	0.546966	0.409882	7768985	7769485	AT1G22015	NA	1	7751001	7753519	2.20122	3.33419	83	1	7753070	7753570	+	1651	interaction15068	15915	14	0.070445	1e-06	3	0.070445	300	-2.54121	61	1344	-11.8757	1100	-10	0.0153296	0.933659	NA	NA
16849561	16850061	AT2G40340	Yes	2	16848437	16850487	0.811279	2.78203	16849561	16850061	AT2G40310	NA	2	16834064	16835711	0.683347	0.527624	1733	2	16835044	16835544	+	130	interaction82577	14517	9	0.070445	0.237622	1	0.070445	100	-0.453883	1674	61	-11.8577	800	-4	-0.0282552	0.957756	NA	NA
22459514	22460014	AT1G60986	NA	1	22458999	22459650	1.89053	1.85275	22459514	22460014	AT1G60983	NA	1	22455319	22455589	1.36321	1.82839	1081	1	22455416	22455916	+	371	interaction39296	4098	29	0.070445	0	11	0.070445	1100	-18.5927	898	261	-11.8576	1800	-28	NA	NA	NA	NA
21634119	21634619	AT1G58320	NA	1	21634122	21635303	1.52037	1.12533	21634119	21634619	AT1G58300	NA	1	21628011	21629996	1.909	1.77617	258	1	21629508	21630008	+	708	interaction36999	4611	12	0.070445	0.000264	2	0.070445	200	-1.33089	244	654	-11.852	1000	-8	1.34632	0.000115276	-0.306498	0.655378
1651530	1652030	AT1G05570	NA	1	1647705	1659437	0.650832	0.475743	1651530	1652030	AT1G05540	Yes	1	1639285	1640811	0.897046	2.3403	95	1	1639531	1640031	+	1737	interaction3487	11999	9	0.070445	0.225363	1	0.070445	100	-0.454109	64	1667	-11.8395	800	-4	0.0242648	0.92968	-1.62535	2.47e-07
1396966	1397466	AT1G04930	NA	1	1396290	1399053	0.792594	0.432447	1396966	1397466	AT1G04920	Yes	1	1391501	1395864	0.7019	0.652434	107	1	1395081	1395581	+	1011	interaction2851	1885	23	0.070445	0	8	0.070445	800	-11.7899	74	776	-11.8378	1500	-20	0.859092	0.000190011	-0.368358	0.231489
5881430	5881930	AT1G17210	NA	1	5880129	5884756	0.651977	0.442467	5881430	5881930	AT1G17190	NA	1	5875349	5876545	1.75624	2.43386	103	1	5875980	5876480	+	620	interaction11876	5450	9	0.070445	0.22893	1	0.070445	100	-0.45418	65	679	-11.8338	800	-4	-0.0692336	0.697479	-0.503147	0.0364215
9907099	9907599	AT1G28306	NA	1	9907201	9907615	3.73026	5.48942	9907099	9907599	AT1G28304	NA	1	9903566	9904010	3.25753	5.57937	1295	1	9903441	9903941	+	254	interaction19317	3658	27	0.070445	0	10	0.070445	1000	-16.2506	1183	155	-11.8297	1700	-26	NA	NA	NA	NA
27170457	27170957	AT1G72200	NA	1	27169794	27171321	1.35705	1.67449	27170457	27170957	AT1G72180	NA	1	27162819	27167430	0.624812	0.440412	1044	1	27165493	27165993	+	101	interaction52702	4964	9	0.070445	0.228092	1	0.070445	100	-0.454248	1276	66	-11.8283	800	-4	-0.725389	0.000128124	0.353793	0.226307
12933023	12933523	AT1G35250	NA	1	12932940	12934479	1.8362	2.33651	12933023	12933523	AT1G35240	NA	1	12927456	12930523	0.732914	0.59195	1393	1	12927894	12928394	+	87	interaction25274	5129	21	0.070445	0	7	0.070445	700	-9.68233	1133	56	-11.8245	1400	-18	-0.818765	0.00304906	-0.419151	0.586822
30043617	30044117	AT1G79860	Yes	1	30042091	30044175	3.03507	6.00455	30043617	30044117	AT1G79840	NA	1	30036955	30041440	2.17389	2.70265	1645	1	30038067	30038567	+	102	interaction58377	5550	20	0.070445	0	6	0.070445	600	-7.53096	1213	103	-11.8134	1400	-16	-0.0100846	0.989331	0.351253	0.151439
242005	242505	AT1G01660	Yes	1	240056	242608	0.840335	2.66747	242005	242505	AT1G01650	NA	1	232840	237817	0.720712	0.381803	1879	1	235561	236061	+	100	interaction484	6444	16	0.070445	0	4	0.070445	400	-4.01502	1387	65	-11.807	1200	-12	-2.25236	1.15e-09	0.295412	0.0437626
25189074	25189574	AT1G67280	NA	1	25188273	25190694	0.658691	0.44808	25189074	25189574	AT1G67260	NA	1	25167461	25169307	4.86628	8.83645	86	1	25168508	25169008	+	965	interaction48131	20566	9	0.070445	0.220232	1	0.070445	100	-0.454618	72	726	-11.7987	800	-4	-0.10068	0.4091	-2.17687	NA
187418	187918	AT1G01510	NA	1	187210	190056	0.826231	0.404019	187418	187918	AT1G01480	NA	1	175781	178400	0.937097	0.63277	86	1	175668	176168	+	546	interaction361	11750	9	0.070445	0.220232	1	0.070445	100	-0.454674	73	629	-11.7942	800	-4	0.055498	0.744582	1.19843	0.0147891
13927982	13928482	AT2G32830	Yes	2	13927698	13929713	2.16001	4.86112	13927982	13928482	AT2G32820	Yes	2	13925816	13926979	1.70353	6.42142	425	2	13925730	13926230	+	690	interaction76847	2252	12	0.070445	0.000284	2	0.070445	200	-1.33089	460	533	-11.779	1000	-8	-1.04511	0.124295	0.571852	NA
12315966	12316466	AT1G33910	NA	1	12314903	12316258	1.51674	1.27915	12315966	12316466	AT1G33900	NA	1	12311517	12313518	1.83889	3.42226	791	1	12313089	12313589	+	1407	interaction24377	2877	34	0.070445	0	14	0.070445	1400	-26.2641	559	1227	-11.7758	2000	-34	0.0240888	NA	3.65423	NA
26799385	26799885	AT1G71040	NA	1	26796965	26800322	0.636321	0.531696	26799385	26799885	AT1G71010	NA	1	26782838	26788970	0.751734	0.39187	447	1	26787017	26787517	+	97	interaction51921	12368	9	0.070445	0.226336	1	0.070445	100	-0.454979	545	79	-11.77	800	-4	-0.216858	0.142049	-0.028331	0.872527
9689924	9690424	AT2G22780	NA	2	9689414	9692154	0.628807	0.400538	9689924	9690424	AT2G22750	NA	2	9672143	9673928	5.06962	7.71898	105	2	9672379	9672879	+	1446	interaction67720	17545	9	0.070445	0.229693	1	0.070445	100	-0.454979	79	1103	-11.77	800	-4	0.0895284	0.556439	0.469182	0.740927
19293563	19294063	AT1G51915	NA	1	19293477	19293969	2.19569	3.00487	19293563	19294063	AT1G51890	Yes	1	19274657	19278528	1.31249	2.85537	683	1	19278443	19278943	+	831	interaction31490	15120	12	0.070445	0.000297	2	0.070445	200	-1.33089	619	792	-11.7581	1000	-8	5.85047	9.02e-05	1.08672	0.000422622
26576510	26577010	AT1G70510	NA	1	26576485	26582431	2.50963	3.22783	26576510	26577010	AT1G70500	Yes	1	26566578	26568729	1.55936	5.22622	98	1	26568121	26568621	+	1139	interaction51251	8389	14	0.070445	1e-06	3	0.070445	300	-2.53869	70	881	-11.7568	1100	-10	-0.186326	0.616577	-0.0536172	0.940122
10179538	10180038	AT1G29140	NA	1	10178901	10180019	1.50435	1.32182	10179538	10180038	AT1G29090	NA	1	10162982	10164452	3.85361	5.36494	110	1	10163986	10164486	+	962	interaction20118	15552	9	0.070445	0.231584	1	0.070445	100	-0.455158	83	793	-11.7559	800	-4	-1.95047	NA	-0.355354	0.907529
10416497	10416997	AT2G24520	NA	2	10415431	10419783	0.743331	0.416933	10416497	10416997	AT2G24500	NA	2	10401034	10402934	0.753087	0.576314	634	2	10400956	10401456	+	1294	interaction68932	15541	12	0.070445	0.000295	2	0.070445	200	-1.33089	646	1137	-11.7556	1000	-8	0.00975365	0.959688	0.195841	0.233327
13792159	13792659	AT2G32487	NA	2	13791886	13793177	1.54446	1.29466	13792159	13792659	AT2G32480	NA	2	13788516	13790073	0.781079	0.491915	861	2	13788977	13789477	+	107	interaction76235	3182	9	0.070445	0.230482	1	0.070445	100	-0.4552	901	84	-11.7526	800	-4	0.649966	0.114897	-0.572301	6.87e-10
11247906	11248406	AT2G26440	Yes	2	11247382	11249493	0.928169	1.11874	11247906	11248406	AT2G26420	Yes	2	11239433	11242239	1.03759	1.27299	996	2	11239485	11239985	+	107	interaction70115	8421	9	0.070445	0.230482	1	0.070445	100	-0.455241	1146	85	-11.7494	800	-4	1.95967	2.34e-12	-0.0921897	0.853541
26572034	26572534	AT1G70505	Yes	1	26570646	26572463	0.730547	1.44882	26572034	26572534	AT1G70500	Yes	1	26566578	26568729	1.55936	5.22622	104	1	26567628	26568128	+	643	interaction51241	4406	14	0.070445	1e-06	3	0.070445	300	-2.53844	71	514	-11.7456	1100	-10	-1.13521	4.98e-11	-0.0536172	0.940122
20937492	20937992	AT1G55970	NA	1	20932128	20938290	0.675743	0.446698	20937492	20937992	AT1G55930	Yes	1	20918716	20922232	0.640156	0.414314	1164	1	20918944	20919444	+	1024	interaction35846	18548	12	0.070445	0.000303	2	0.070445	200	-1.33089	919	920	-11.7385	1000	-8	-0.360099	0.0554012	0.215001	0.0698442
8664057	8664557	AT1G24450	NA	1	8664152	8665289	0.83071	0.400459	8664057	8664557	AT1G24420	NA	1	8656686	8657997	0.724488	0.8972	110	1	8656530	8657030	+	860	interaction17257	7527	9	0.070445	0.231584	1	0.070445	100	-0.455396	89	644	-11.7372	800	-4	-0.00521513	0.984257	-1.61076	0.000296267
4471975	4472475	AT1G13120	NA	1	4469180	4473213	0.728289	0.371212	4471975	4472475	AT1G13090	Yes	1	4461805	4463543	0.812106	0.602464	104	1	4462553	4463053	+	675	interaction9098	9422	9	0.070445	0.229292	1	0.070445	100	-0.455432	90	689	-11.7343	800	-4	0.0150475	0.937083	-0.402508	0.0123559
27553972	27554472	AT1G73280	NA	1	27552969	27555322	1.18678	1.95744	27553972	27554472	AT1G73270	NA	1	27549020	27552517	1.68852	2.3689	349	1	27549545	27550045	+	113	interaction53400	4427	9	0.070445	0.232623	1	0.070445	100	-0.455432	228	90	-11.7343	800	-4	-0.361341	0.113008	-0.127989	0.729607
22496070	22496570	AT1G61080	Yes	1	22493193	22497019	1.15354	1.83034	22496070	22496570	AT1G61030	NA	1	22477895	22482380	0.682459	0.421382	1991	1	22481401	22481901	+	97	interaction39415	14669	9	0.070445	0.226336	1	0.070445	100	-0.455468	1770	91	-11.7315	800	-4	0.0950956	0.886896	0.0874702	0.567428
29615933	29616433	AT1G78760	Yes	1	29615173	29616738	2.26839	3.32655	29615933	29616433	AT1G78720	Yes	1	29605628	29607510	1.80511	3.80567	1727	1	29605973	29606473	+	1565	interaction57597	9960	17	0.131476	0	2	0.092024	153.101	-1.33089	1550	1148	-11.7304	757.755	-12	-0.705317	0.6756	-2.50936	4.67e-09
7893382	7893882	AT2G18150	NA	2	7892132	7893653	3.65866	7.53695	7893382	7893882	AT2G18130	NA	2	7879307	7883935	1.15271	1.08756	1981	2	7879997	7880497	+	162	interaction64410	13385	9	0.070445	0.244244	1	0.070445	100	-0.455537	1816	93	-11.7261	800	-4	-1.80586	9.79e-19	1.5594	NA
22517589	22518089	AT1G61110	NA	1	22516601	22518287	3.02829	4.91199	22517589	22518089	AT1G61090	Yes	1	22499316	22500331	1.3809	4.08671	129	1	22500072	22500572	+	1708	interaction39646	17517	9	0.070445	0.237365	1	0.070445	100	-0.455571	94	1115	-11.7235	800	-4	-2.39146	NA	NA	NA
13910372	13910872	AT2G32795	NA	2	13909422	13910910	0.847071	0.480162	13910372	13910872	AT2G32765	NA	2	13894861	13895582	0.484378	0.446412	1423	2	13894953	13895453	+	98	interaction76709	15419	9	0.070445	0.226771	1	0.070445	100	-0.455635	1626	96	-11.7184	800	-4	0.00994136	0.972475	0.0353974	0.908235
10060467	10060967	AT2G23660	NA	2	10060129	10061822	0.509701	0.888108	10060467	10060967	AT2G23630	Yes	2	10052565	10055317	1.64899	2.26536	149	2	10054107	10054607	+	1914	interaction68289	6360	20	0.070445	0	6	0.070445	600	-7.52001	115	1628	-11.7143	1400	-16	1.73974	NA	-0.0210535	0.970401
26455916	26456416	AT1G70250	NA	1	26452964	26456088	2.01264	2.94965	26455916	26456416	AT1G70220	NA	1	26446135	26448009	1.05228	0.575422	97	1	26446982	26447482	+	817	interaction51177	8934	9	0.070445	0.226336	1	0.070445	100	-0.45587	104	698	-11.7002	800	-4	-1.03849	1.4e-10	-0.172413	0.759657
9321672	9322172	AT2G21870	NA	2	9320194	9322734	0.797016	0.396593	9321672	9322172	AT2G21850	Yes	2	9315217	9318238	1.15489	1.63857	787	2	9314995	9315495	+	138	interaction66946	6677	9	0.070445	0.239537	1	0.070445	100	-0.455949	778	107	-11.694	800	-4	-0.061124	0.628957	0.0595243	0.822935
28209981	28210481	AT1G75160	NA	1	28209436	28211804	2.03071	1.75263	28209981	28210481	AT1G75150	NA	1	28204386	28208573	0.673702	0.419315	679	1	28205532	28206032	+	173	interaction54891	4449	20	0.070445	0	6	0.070445	600	-7.51763	682	118	-11.693	1400	-16	0.296259	0.702922	-0.361221	0.0774386
7933001	7933501	AT2G18230	NA	2	7931922	7934329	0.64184	0.33579	7933001	7933501	AT2G18180	Yes	2	7911053	7913695	0.806669	2.77516	154	2	7913501	7914001	+	1944	interaction64746	19500	9	0.070445	0.242835	1	0.070445	100	-0.455999	109	1517	-11.6902	800	-4	-0.462154	0.0062418	-1.49669	0.0176238
18925542	18926042	AT1G51055	Yes	1	18925285	18926315	1.0184	0.960854	18925542	18926042	AT1G51035	NA	1	18917546	18917774	4.18905	5.47265	180	1	18917479	18917979	+	1030	interaction29956	8063	9	0.070445	0.247268	1	0.070445	100	-0.456023	110	989	-11.6883	800	-4	-0.62864	0.506549	-1.26661	0.477069
441972	442472	AT1G02260	Yes	1	440440	442877	0.766433	1.45839	441972	442472	AT1G02250	Yes	1	437950	439559	1.00138	4.74624	133	1	437589	438089	+	788	interaction777	4383	20	0.070445	0	6	0.070445	600	-7.51686	119	608	-11.6862	1400	-16	-0.547268	0.00301737	-2.19703	0.2458
12948521	12949021	AT2G30380	Yes	2	12948283	12950573	0.650241	0.62975	12948521	12949021	AT2G30340	NA	2	12931218	12932582	2.09216	3.06686	125	2	12931605	12932105	+	883	interaction74174	16916	9	0.070445	0.236325	1	0.070445	100	-0.456071	112	757	-11.6846	800	-4	-0.212561	0.876388	0.586271	0.0681155
22787039	22787539	AT1G61700	Yes	1	22787011	22788333	1.62828	2.82452	22787039	22787539	AT1G61680	NA	1	22772314	22774720	1.46679	1.34266	1280	1	22772477	22772977	+	124	interaction40403	14562	9	0.070445	0.236048	1	0.070445	100	-0.456139	1256	115	-11.6793	800	-4	NA	NA	-0.199489	0.876364
29512535	29513035	AT1G78440	Yes	1	29511598	29513051	0.869785	6.04535	29512535	29513035	AT1G78420	Yes	1	29504531	29507669	0.724122	1.16235	1958	1	29505508	29506008	+	115	interaction57197	7027	9	0.070445	0.233284	1	0.070445	100	-0.456161	1861	116	-11.6776	800	-4	-6.92401	1.12e-08	-0.0586408	0.699574
17785359	17785859	AT1G48150	NA	1	17785396	17786368	0.561508	0.869547	17785359	17785859	AT1G48140	NA	1	17782030	17784211	0.771602	0.400915	963	1	17782533	17783033	+	125	interaction28054	2826	36	0.070445	0	17	0.070445	1700	-35.8536	734	92	-11.66	1900	-40	0.747547	NA	0.00612023	0.979104
14510490	14510990	AT2G34370	NA	2	14510481	14511891	2.34583	3.28578	14510490	14510990	AT2G34357	NA	2	14498589	14505727	0.879247	0.484333	1414	2	14500012	14500512	+	189	interaction78175	10478	14	0.070445	2e-06	3	0.070445	300	-2.53656	1118	80	-11.6588	1100	-10	-0.862446	NA	0.0723768	0.662318
12674987	12675487	AT2G29650	NA	2	12673382	12676049	0.719602	0.423544	12674987	12675487	AT2G29630	NA	2	12666934	12670311	0.744371	0.474247	806	2	12667507	12668007	+	145	interaction73310	7480	9	0.070445	0.241041	1	0.070445	100	-0.456415	761	129	-11.6581	800	-4	-1.17795	3.67e-15	-0.270058	0.11558
24728091	24728591	AT1G66320	NA	1	24726811	24728614	4.6813	5.59794	24728091	24728591	AT1G66310	NA	1	24722970	24724475	3.09017	3.58186	1498	1	24722522	24723022	+	336	interaction46458	5569	32	0.070445	0	13	0.070445	1300	-23.7122	1122	289	-11.6562	1900	-32	1.01719	NA	3.97523	NA
486924	487424	AT1G02400	NA	1	486800	489577	1.12952	0.943891	486924	487424	AT1G02380	Yes	1	476999	478971	0.704052	1.11926	1597	1	478539	479039	+	129	interaction887	8385	9	0.070445	0.237365	1	0.070445	100	-0.456449	1749	131	-11.6554	800	-4	0.900035	0.00239648	-0.033412	0.949824
26726079	26726579	AT1G70890	NA	1	26725625	26726544	3.36749	4.13765	26726079	26726579	AT1G70850	NA	1	26714865	26716829	3.39207	5.72618	1582	1	26714979	26715479	+	160	interaction51648	11100	9	0.070445	0.243918	1	0.070445	100	-0.456449	1490	131	-11.6554	800	-4	-0.0495901	0.869636	-0.256202	0.416639
13741472	13741972	AT2G32370	NA	2	13740877	13746286	2.90205	4.23637	13741472	13741972	AT2G32350	NA	2	13734944	13735788	1.37377	1.37138	130	2	13735378	13735878	+	1243	interaction76170	6094	9	0.070445	0.237622	1	0.070445	100	-0.456499	134	1000	-11.6516	800	-4	1.0574	NA	-2.09711	NA
17884164	17884664	AT1G48405	Yes	1	17884644	17885614	1.05981	1.24329	17884164	17884664	AT1G48400	Yes	1	17882135	17883855	0.831817	1.97882	143	1	17881714	17882214	+	399	interaction28096	2450	9	0.070445	0.240591	1	0.070445	100	-0.456515	135	372	-11.6503	800	-4	0.218613	0.891936	-1.46881	0.104328
5830432	5830932	AT1G17050	NA	1	5829079	5831343	1.08766	0.480506	5830432	5830932	AT1G17000	Yes	1	5812727	5816662	1.51032	2.09837	153	1	5813148	5813648	+	1644	interaction11711	17284	9	0.070445	0.242655	1	0.070445	100	-0.456562	138	1303	-11.6467	800	-4	-1.19354	2.35e-32	1.73974	NA
7396076	7396576	AT1G21120	NA	1	7395227	7396773	2.34606	2.99389	7396076	7396576	AT1G21100	Yes	1	7386838	7388428	1.0419	1.73374	1370	1	7386927	7387427	+	156	interaction13990	9149	9	0.070445	0.243201	1	0.070445	100	-0.456578	1122	139	-11.6456	800	-4	2.22359	4.72e-16	1.03541	1.06e-10
24210551	24211051	AT1G65170	NA	1	24209612	24211116	1.13117	1.22554	24210551	24211051	AT1G65130	Yes	1	24196471	24201022	0.734327	0.602405	202	1	24196913	24197413	+	1157	interaction43864	13638	9	0.070445	0.250272	1	0.070445	100	-0.456607	141	1063	-11.6433	800	-4	NA	NA	0.200413	0.801639
843863	844363	AT1G03400	NA	1	842746	844190	0.829341	0.679013	843863	844363	AT1G03390	NA	1	841032	842418	0.962489	0.446333	222	1	841518	842018	+	166	interaction1769	2345	9	0.070445	0.244931	1	0.070445	100	-0.456665	233	145	-11.6389	800	-4	0.0607053	0.804804	0.747547	NA
19250023	19250523	AT1G51840	NA	1	19249448	19250709	2.68566	3.14685	19250023	19250523	AT1G51810	NA	1	19227118	19232359	1.96936	2.2884	1436	1	19231019	19231519	+	161	interaction31150	19004	9	0.070445	0.244054	1	0.070445	100	-0.456692	1336	147	-11.6368	800	-4	0.0221962	0.971427	NA	NA
1079417	1079917	AT2G03560	Yes	2	1079638	1081376	2.04071	2.58345	1079417	1079917	AT2G03520	NA	2	1069490	1071382	0.691031	0.64741	1179	2	1069999	1070499	+	130	interaction60205	9418	14	0.070445	1e-06	3	0.070445	300	-2.53602	1228	83	-11.6344	1100	-10	1.5188	NA	-1.8543	0.171582
7382567	7383067	AT2G16990	NA	2	7383034	7387854	1.71882	1.9679	7382567	7383067	AT2G16980	NA	2	7376348	7381103	2.157	2.75207	152	2	7377310	7377810	+	313	interaction63456	5257	9	0.070445	0.242472	1	0.070445	100	-0.456782	154	208	-11.6299	800	-4	-0.929932	0.00270527	-0.108386	0.706025
20386636	20387136	AT1G54575	NA	1	20387059	20387710	2.22026	1.97929	20386636	20387136	AT1G54560	Yes	1	20371648	20379745	0.782009	0.636355	1105	1	20377990	20378490	+	196	interaction34443	8646	9	0.070445	0.249468	1	0.070445	100	-0.456807	952	156	-11.6281	800	-4	-0.409523	0.0304627	0.261952	0.893095
27988570	27989070	AT1G74460	Yes	1	27987960	27989801	0.889529	1.42189	27988570	27989070	AT1G74440	Yes	1	27976501	27980404	0.739847	0.608047	1687	1	27977585	27978085	+	137	interaction54216	10985	9	0.070445	0.239298	1	0.070445	100	-0.456865	1702	161	-11.6237	800	-4	-0.988059	4.83e-09	0.0672538	0.860193
24220966	24221466	AT1G65200	Yes	1	24218469	24222789	1.04789	1.19653	24220966	24221466	AT1G65180	NA	1	24211740	24213870	1.83958	2.63021	197	1	24213430	24213930	+	877	interaction43932	7536	9	0.070445	0.249611	1	0.070445	100	-0.456898	164	833	-11.6211	800	-4	1.67987	NA	0.0592422	0.891272
18494078	18494578	AT1G49950	NA	1	18494102	18497239	0.779941	0.335596	18494078	18494578	AT1G49910	NA	1	18479024	18481475	0.715863	0.452328	204	1	18479854	18480354	+	757	interaction29349	14224	9	0.070445	0.250491	1	0.070445	100	-0.456909	165	508	-11.6203	800	-4	0.0307809	0.880962	-0.382057	0.176903
6495949	6496449	AT1G18835	NA	1	6496097	6496396	4.15409	5.79782	6495949	6496449	AT1G18830	Yes	1	6489308	6494218	0.86792	3.73273	1366	1	6490531	6491031	+	35	interaction12517	5418	16	0.070445	0	5	0.070445	500	-5.94361	1297	21	-11.612	1100	-12	-1.13188	0.031067	-1.74828	0.00303139
23325852	23326352	AT1G62970	NA	1	23323316	23326053	0.521679	0.36353	23325852	23326352	AT1G62940	Yes	1	23310534	23312747	1.29451	1.23951	150	1	23310882	23311382	+	949	interaction41464	14970	9	0.070445	0.242096	1	0.070445	100	-0.457019	176	689	-11.6119	800	-4	0.0965105	0.638743	1.53724	NA
12443577	12444077	AT2G28970	NA	2	12443918	12448163	2.30902	3.02047	12443577	12444077	AT2G28960	NA	2	12437913	12442347	3.06743	4.04689	652	2	12437994	12438494	+	194	interaction72350	5583	9	0.070445	0.249236	1	0.070445	100	-0.457019	559	176	-11.6119	800	-4	0.214682	0.57046	0.230829	0.263388
12722924	12723424	AT2G29800	NA	2	12722938	12724602	3.27274	4.53908	12722924	12723424	AT2G29760	Yes	2	12712883	12715852	0.700183	0.564593	110	2	12713422	12713922	+	1800	interaction73720	9502	14	0.070445	1e-06	3	0.070445	300	-2.53552	86	1604	-11.6118	1100	-10	NA	NA	0.383522	0.0676047
18284621	18285121	AT2G44220	Yes	2	18283802	18285837	0.950104	2.22362	18284621	18285121	AT2G44210	Yes	2	18280622	18282876	0.552437	2.07141	836	2	18282511	18283011	+	139	interaction86230	2110	25	0.070445	0	9	0.070445	900	-13.935	541	123	-11.6104	1600	-24	-2.13134	NA	-0.819121	4.09e-18
28134668	28135168	AT1G74900	NA	1	28133932	28135667	0.847214	0.362791	28134668	28135168	AT1G74880	NA	1	28129857	28131077	0.706627	0.672106	227	1	28130917	28131417	+	590	interaction54586	3751	9	0.070445	0.253019	1	0.070445	100	-0.457047	179	625	-11.6098	800	-4	0.591775	0.0134305	-0.0679579	0.70039
533517	534017	AT1G02530	Yes	1	529794	534677	0.654829	0.920338	533517	534017	AT1G02500	Yes	1	518250	520437	0.612682	0.476707	155	1	518467	518967	+	1773	interaction1078	15050	14	0.070445	1e-06	3	0.070445	300	-2.53536	87	1649	-11.6046	1100	-10	0.306765	0.721871	0.126668	0.344083
9420495	9420995	AT2G22145	NA	2	9420319	9420589	1.67923	1.77325	9420495	9420995	AT2G22140	NA	2	9414838	9418668	0.887139	0.559927	547	2	9416506	9417006	+	236	interaction67354	3989	9	0.070445	0.254007	1	0.070445	100	-0.457157	553	192	-11.6014	800	-4	NA	NA	-0.345738	0.395104
26421310	26421810	AT1G70160	NA	1	26419948	26422529	0.77542	0.378555	26421310	26421810	AT1G70150	NA	1	26416897	26419588	0.679056	0.45106	762	1	26418420	26418920	+	241	interaction50996	2890	9	0.070445	0.254464	1	0.070445	100	-0.457274	675	208	-11.5926	800	-4	-0.329698	0.0300613	0.39392	0.0175597
21117041	21117541	AT1G56410	Yes	1	21117146	21119241	1.10397	4.18956	21117041	21117541	AT1G56380	NA	1	21101326	21102701	2.32238	4.19863	228	1	21101964	21102464	+	1404	interaction36150	15077	9	0.070445	0.253125	1	0.070445	100	-0.457363	222	1153	-11.5859	800	-4	6.07326	0.000402257	NA	NA
7435566	7436066	AT2G17090	Yes	2	7435087	7437298	2.61823	3.6545	7435566	7436066	AT2G17060	Yes	2	7422410	7426877	1.7678	2.19858	294	2	7423485	7423985	+	573	interaction63602	12081	9	0.070445	0.258702	1	0.070445	100	-0.457403	229	466	-11.5829	800	-4	NA	NA	-0.178325	0.730901
2892965	2893465	AT1G09000	NA	1	2891036	2895182	0.707821	0.500232	2892965	2893465	AT1G08990	NA	1	2888752	2890959	3.26534	4.97143	456	1	2888543	2889043	+	1946	interaction5449	4422	32	0.070445	0	13	0.070445	1300	-23.6778	338	1794	-11.5663	1900	-32	-0.419943	0.137569	-0.738566	0.00260096
25827508	25828008	AT1G68750	Yes	1	25822941	25828107	2.16481	2.97483	25827508	25828008	AT1G68720	NA	1	25804417	25808982	0.625547	0.3697	1930	1	25808481	25808981	+	123	interaction49422	19027	14	0.070445	1e-06	3	0.070445	300	-2.53448	1915	93	-11.5652	1100	-10	0.759198	NA	0.0219503	0.89873
18108105	18108605	AT2G43680	NA	2	18108348	18111831	0.655348	0.365841	18108105	18108605	AT2G43650	NA	2	18099237	18103345	0.788581	0.436068	602	2	18101480	18101980	+	318	interaction85924	6625	9	0.070445	0.260145	1	0.070445	100	-0.457736	702	310	-11.5579	800	-4	0.0387349	0.861135	0.239933	0.0894067
20630520	20631020	AT1G55310	NA	1	20630064	20632973	0.699622	0.407416	20630520	20631020	AT1G55300	NA	1	20628022	20629692	0.572779	0.425144	525	1	20628598	20629098	+	105	interaction34983	1922	14	0.070445	1e-06	3	0.070445	300	-2.53409	466	96	-11.5474	1100	-10	0.250783	0.105045	-0.0855468	0.693371
27132023	27132523	AT1G72120	Yes	1	27132096	27133985	0.910615	2.57957	27132023	27132523	AT1G72100	Yes	1	27127211	27128978	2.71858	2.71377	1497	1	27128124	27128624	+	185	interaction52581	3899	20	0.070445	0	6	0.070445	600	-7.50071	1566	145	-11.5438	1400	-16	0.0551539	0.91267	-0.525776	0.689204
10655057	10655557	AT1G30270	NA	1	10654856	10658897	0.920736	1.15343	10655057	10655557	AT1G30240	NA	1	10641098	10645935	0.788636	0.477945	1601	1	10641506	10642006	+	127	interaction21427	13551	16	0.070445	0	4	0.070445	400	-4.00228	1644	86	-11.5436	1200	-12	0.178491	0.199345	0.225698	0.20051
958922	959422	AT1G03810	Yes	1	958758	959609	2.44827	4.4504	958922	959422	AT1G03780	NA	1	947519	951827	0.656622	0.377089	1708	1	950981	951481	+	132	interaction2046	7941	14	0.070445	1e-06	3	0.070445	300	-2.53396	1413	97	-11.5418	1100	-10	1.25102	NA	-0.250316	0.342705
10552402	10552902	AT1G30080	Yes	1	10550946	10553215	1.83649	3.64865	10552402	10552902	AT1G30050	Yes	1	10543021	10544591	0.833442	0.747671	1101	1	10543101	10543601	+	488	interaction21067	9301	9	0.070445	0.266419	1	0.070445	100	-0.458109	975	514	-11.5301	800	-4	-0.105997	0.7903	-0.716191	0.505318
21925051	21925551	AT1G59660	NA	1	21924692	21929424	0.74066	0.349503	21925051	21925551	AT1G59620	Yes	1	21902283	21905685	0.668269	0.87924	764	1	21902013	21902513	+	1484	interaction37870	23038	9	0.070445	0.270468	1	0.070445	100	-0.458116	521	1772	-11.5296	800	-4	0.376004	0.0318338	-0.735499	0.00101084
12704918	12705418	AT2G29730	NA	2	12703536	12705181	0.705593	0.783449	12704918	12705418	AT2G29680	NA	2	12689548	12693024	0.776263	0.44038	596	2	12690407	12690907	+	890	interaction73587	14511	9	0.070445	0.268471	1	0.070445	100	-0.458134	538	669	-11.5283	800	-4	-0.253757	0.200834	-1.01315	1.06e-07
13945947	13946447	AT2G32870	NA	2	13944610	13946790	2.43925	3.71889	13945947	13946447	AT2G32820	Yes	2	13925816	13926979	1.70353	6.42142	637	2	13925895	13926395	+	1838	interaction76976	20052	9	0.070445	0.269096	1	0.070445	100	-0.458164	570	1557	-11.526	800	-4	0.019197	0.915888	0.571852	NA
24070984	24071484	AT1G64790	NA	1	24064936	24083428	0.823674	0.481374	24070984	24071484	AT1G64780	NA	1	24060769	24062630	1.25299	1.39834	139	1	24061933	24062433	+	1862	interaction43571	9051	21	0.070445	0	7	0.070445	700	-9.64054	65	1653	-11.5222	1400	-18	-0.0235748	0.915048	-0.821879	3.09e-07
24292521	24293021	AT1G65390	NA	1	24292477	24294631	1.7802	2.33426	24292521	24293021	AT1G65350	NA	1	24272517	24277275	2.8447	2.39499	763	1	24276527	24277027	+	1630	interaction44303	15994	9	0.070445	0.270465	1	0.070445	100	-0.458279	734	943	-11.5175	800	-4	2.30419	0.0593169	-0.508652	0.6685
12961523	12962023	AT2G30420	NA	2	12960826	12962162	0.722967	0.629237	12961523	12962023	AT2G30395	NA	2	12954173	12955089	0.841655	0.65116	990	2	12955004	12955504	+	105	interaction74187	6519	16	0.070445	0	4	0.070445	400	-4.00096	1146	89	-11.5171	1200	-12	-1.26281	4.94e-09	0.029406	0.945177
20833969	20834469	AT1G55730	NA	1	20831051	20834519	0.760713	0.533159	20833969	20834469	AT1G55670	NA	1	20802669	20803449	0.579334	0.638624	1471	1	20802983	20803483	+	1176	interaction35569	30986	8	0.084151	1	1	0.106272	66.2869	-0.458467	1472	1396	-11.5065	603.408	-4	0.0161752	0.933766	-0.228022	0.069384
23136981	23137481	AT1G62510	NA	1	23136368	23137191	2.14647	3.09752	23136981	23137481	AT1G62500	NA	1	23132044	23133502	5.55527	8.20271	1240	1	23132501	23133001	+	97	interaction41100	4480	31	0.070445	0	14	0.070445	1400	-27.4143	1300	66	-11.4908	1700	-32	0.236202	0.592983	1.11638	2.39e-15
7988940	7989440	AT1G22600	NA	1	7987140	7989217	1.37047	1.52754	7988940	7989440	AT1G22590	NA	1	7981739	7984334	0.773666	0.498304	1178	1	7981627	7982127	+	1051	interaction15864	7313	23	0.070445	0	8	0.072514	777.174	-11.5093	1376	1019	-11.4908	1522.83	-20	-0.750174	0.378153	-0.489863	6.6e-05
7573013	7573513	AT2G17440	NA	2	7571139	7573799	0.745425	0.341005	7573013	7573513	AT2G17430	NA	2	7568017	7570840	0.619013	0.439301	132	2	7568436	7568936	+	1203	interaction63935	4577	23	0.070445	0	8	0.070445	800	-11.7288	92	1024	-11.4908	1500	-20	0.456521	0.00198188	0.150967	0.664355
13932433	13932933	AT2G32840	NA	2	13932903	13934949	0.630825	0.358996	13932433	13932933	AT2G32830	Yes	2	13927698	13929713	2.16001	4.86112	209	2	13928582	13929082	+	1896	interaction76888	3851	20	0.070445	0	6	0.070445	600	-7.49424	159	1721	-11.4878	1400	-16	0.257582	0.190666	-1.04511	0.124295
15049092	15049592	AT2G35810	NA	2	15049149	15050323	1.04926	1.00987	15049092	15049592	AT2G35790	NA	2	15040678	15042123	0.693714	0.371943	1621	2	15041524	15042024	+	165	interaction79403	7568	14	0.070445	1e-06	3	0.070445	300	-2.53147	1645	122	-11.4321	1100	-10	0.0626526	0.789832	0.257879	0.0651801
11457513	11458013	AT2G26870	NA	2	11457007	11459365	2.4134	2.23834	11457513	11458013	AT2G26850	NA	2	11449268	11451239	2.5097	2.71678	147	2	11450455	11450955	+	1399	interaction70397	7058	18	0.070445	0	5	0.070445	500	-5.6623	123	1069	-11.4216	1300	-14	0.309637	0.125122	NA	NA
4048478	4048978	AT1G11990	Yes	1	4046245	4049060	1.36658	3.16093	4048478	4048978	AT1G11960	NA	1	4039710	4043880	0.745743	0.456478	1617	1	4042508	4043008	+	134	interaction7709	5970	16	0.070445	0	4	0.070445	400	-3.99463	1420	107	-11.3915	1200	-12	-2.28766	0.00251449	0.673986	1.57e-05
29512846	29513346	AT1G78440	Yes	1	29511598	29513051	0.869785	6.04535	29512846	29513346	AT1G78430	Yes	1	29508958	29510895	0.637189	1.1011	668	1	29509996	29510496	+	227	interaction57207	2850	14	0.070445	2e-06	3	0.070445	300	-2.53018	724	141	-11.376	1100	-10	-6.92401	1.12e-08	-0.809978	0.000884887
9740529	9741029	AT1G27950	NA	1	9740703	9742159	1.14173	1.25869	9740529	9741029	AT1G27940	Yes	1	9733596	9738129	0.68313	1.98685	1228	1	9734529	9735029	+	73	interaction18824	6000	17	0.070445	0	5	0.070445	500	-5.77196	1093	41	-11.3359	1200	-14	-0.0597614	0.752884	-0.77646	0.00462552
11823970	11824470	AT2G27750	Yes	2	11823915	11824461	3.74992	6.92162	11823970	11824470	AT2G27740	Yes	2	11822731	11823732	2.21395	3.88863	476	2	11823041	11823541	+	811	interaction71199	929	56	0.070445	0	30	0.070445	3000	-76.6207	419	623	-11.335	2600	-68	-1.17601	NA	-0.578109	0.0215526
27775957	27776457	AT1G73860	Yes	1	27770985	27776857	0.743439	1.52203	27775957	27776457	AT1G73850	Yes	1	27767262	27770457	2.21608	2.87903	1340	1	27769463	27769963	+	112	interaction53784	6494	16	0.070445	0	4	0.070445	400	-3.99149	1134	119	-11.3304	1200	-12	-0.715649	0.0176129	0.0730794	0.695891
6302954	6303454	AT2G14720	NA	2	6300487	6304394	0.73345	0.507506	6302954	6303454	AT2G14700	NA	2	6292465	6295726	1.40168	1.634	56	2	6293321	6293821	+	1412	interaction62321	9633	11	0.070445	0.001593	2	0.070445	200	-1.33107	26	1178	-11.3181	900	-6	-0.0214592	0.898869	NA	NA
1960927	1961427	AT2G05370	NA	2	1960412	1961840	0.829267	0.880906	1960927	1961427	AT2G05350	NA	2	1949613	1954740	0.700126	0.482735	1249	2	1950019	1950519	+	31	interaction61236	10908	8	0.070445	1	1	0.070445	100	-0.431543	1200	11	-11.317	700	-4	0.899936	NA	0.425085	0.781322
13299589	13300089	AT2G31215	Yes	2	13299806	13300302	2.03801	2.63798	13299589	13300089	AT2G31210	Yes	2	13296142	13298277	0.781579	1.1608	366	2	13296552	13297052	+	194	interaction75065	3037	18	0.070445	0	5	0.070445	500	-5.6534	296	148	-11.3147	1300	-14	NA	NA	-2.06546	NA
24701014	24701514	AT1G66270	NA	1	24699989	24703041	3.62397	5.11784	24701014	24701514	AT1G66260	NA	1	24695639	24698914	0.724194	0.494245	155	1	24698571	24699071	+	630	interaction46187	2443	18	0.070445	0	5	0.070445	500	-5.65311	149	633	-11.3112	1300	-14	0.72596	0.00348916	0.23367	0.299897
18305906	18306406	AT2G44290	Yes	2	18305200	18306251	0.731977	2.51007	18305906	18306406	AT2G44280	NA	2	18301349	18304284	0.662808	0.461048	1045	2	18301986	18302486	+	139	interaction86312	3920	23	0.070445	0	8	0.070445	800	-11.6921	1128	108	-11.2924	1500	-20	-1.10167	2.54e-06	0.0464539	0.8681
12320549	12321049	AT1G33920	NA	1	12319904	12320870	2.4203	2.75156	12320549	12321049	AT1G33910	NA	1	12314903	12316258	1.51674	1.27915	1942	1	12315971	12316471	+	791	interaction24481	4578	40	0.074725	0	17	0.070445	1700	-34.666	1600	559	-11.2917	2070.87	-44	NA	NA	0.0240888	NA
9042980	9043480	AT1G26150	NA	1	9039627	9043288	0.67976	0.398212	9042980	9043480	AT1G26130	NA	1	9033217	9038577	0.641425	0.388777	822	1	9037009	9037509	+	77	interaction17831	5971	11	0.070445	0.002016	2	0.070445	200	-1.33106	930	27	-11.2578	900	-6	-0.720108	0.00107859	-0.527024	0.00534624
19620386	19620886	AT1G52690	NA	1	19619744	19621534	3.42316	5.31684	19620386	19620886	AT1G52680	NA	1	19618142	19619021	3.26134	3.62881	911	1	19618547	19619047	+	154	interaction32389	1839	23	0.070445	0	8	0.070445	800	-11.676	749	117	-11.2075	1500	-20	-4.14302	2.54e-07	NA	NA
167985	168485	AT2G01360	NA	2	167996	168479	1.3154	0.771658	167985	168485	AT2G01330	NA	2	158276	160901	0.610408	0.33472	1587	2	158917	159417	+	59	interaction59007	9068	11	0.070445	0.001669	2	0.070445	200	-1.33105	1278	28	-11.2027	900	-6	NA	NA	-0.0181081	0.932302
11450432	11450932	AT2G26850	NA	2	11449268	11451239	2.5097	2.71678	11450432	11450932	AT2G26840	NA	2	11447196	11448949	0.753451	0.448762	1399	2	11447530	11448030	+	810	interaction70351	2902	27	0.070445	0	10	0.070445	1000	-16.0729	1069	582	-11.162	1700	-24	NA	NA	-0.315303	0.101804
12889566	12890066	AT2G30210	Yes	2	12887445	12889874	1.76627	5.16434	12889566	12890066	AT2G30200	NA	2	12882954	12885768	0.652748	0.389404	1610	2	12884987	12885487	+	102	interaction73966	4579	21	0.070445	0	7	0.070445	700	-9.58755	1414	82	-11.1617	1400	-18	-1.37546	1.7e-18	-0.0248691	0.916653
12871089	12871589	AT1G35170	NA	1	12870737	12872194	1.46602	1.45719	12871089	12871589	AT1G35150	NA	1	12864157	12866238	0.781685	0.464913	765	1	12865036	12865536	+	65	interaction25150	6053	11	0.070445	0.001803	2	0.070445	200	-1.33104	689	29	-11.1522	900	-6	-0.214225	NA	-1.17601	NA
23717027	23717527	AT1G63900	NA	1	23716642	23719337	0.643499	0.502052	23717027	23717527	AT1G63870	Yes	1	23707130	23711901	0.8347	1.01569	1691	1	23708958	23709458	+	241	interaction42472	8069	16	0.070445	0	4	0.070445	400	-3.98206	1562	180	-11.1511	1200	-12	0.278796	0.163799	0.351321	0.832066
4389945	4390445	AT1G12880	Yes	1	4389750	4391151	0.653392	1.06443	4389945	4390445	AT1G12860	NA	1	4384352	4386610	0.565945	0.877884	1832	1	4385498	4385998	+	127	interaction8744	4447	38	0.070445	0	19	0.070445	1900	-42.2076	1811	87	-11.1395	1900	-42	-0.263809	0.235952	-0.612893	0.000620354
10394884	10395384	AT2G24460	Yes	2	10394328	10395390	1.60209	2.45687	10394884	10395384	AT2G24440	Yes	2	10391088	10392828	0.702587	0.462593	842	2	10392023	10392523	+	291	interaction68697	2861	16	0.070445	0	4	0.070445	400	-3.98057	670	196	-11.1232	1200	-12	NA	NA	-0.0973262	0.764947
12705004	12705504	AT2G29730	NA	2	12703536	12705181	0.705593	0.783449	12705004	12705504	AT2G29710	NA	2	12698672	12700343	0.62564	0.368631	596	2	12699437	12699937	+	1019	interaction73592	5567	14	0.070445	2e-06	3	0.070445	300	-2.5241	538	798	-11.1205	1100	-10	-0.253757	0.200834	-0.171503	0.701484
21930498	21930998	AT1G59670	NA	1	21930009	21931366	2.84193	5.15359	21930498	21930998	AT1G59660	NA	1	21924692	21929424	0.74066	0.349503	671	1	21924216	21924716	+	816	interaction37900	6282	14	0.070445	2e-06	3	0.070445	300	-2.52388	600	705	-11.1114	1100	-10	-0.787628	NA	0.376004	0.0318338
25827446	25827946	AT1G68750	Yes	1	25822941	25828107	2.16481	2.97483	25827446	25827946	AT1G68740	Yes	1	25812448	25816657	0.733883	1.63059	1930	1	25816451	25816951	+	83	interaction49433	10995	17	0.070445	0	5	0.070445	500	-5.75353	1915	46	-11.1006	1200	-14	0.759198	NA	-0.196479	0.30039
13330974	13331474	AT1G35850	NA	1	13330509	13331506	0.636734	0.471468	13330974	13331474	AT1G35830	NA	1	13321213	13322122	4.14189	7.09622	1216	1	13321513	13322013	+	904	interaction25913	9461	14	0.070445	2e-06	3	0.070445	300	-2.52352	737	829	-11.0968	1100	-10	NA	NA	0.00326546	0.993238
11938547	11939047	AT1G32940	NA	1	11937595	11940978	0.579614	0.436188	11938547	11939047	AT1G32910	Yes	1	11925425	11926908	1.06854	0.753191	61	1	11925497	11925997	+	2065	interaction23621	13050	13	0.070445	1e-05	3	0.070445	300	-2.56214	30	1853	-11.0887	1000	-8	0.498969	0.000496122	2.84515	0.0310958
6302095	6302595	AT1G18310	Yes	1	6301199	6303956	0.860645	3.82811	6302095	6302595	AT1G18300	NA	1	6299686	6301086	0.957123	0.673046	114	1	6299540	6300040	+	773	interaction12297	2555	19	0.070445	0	6	0.070445	600	-7.60166	62	823	-11.0837	1300	-16	-1.84942	NA	-0.492795	0.0532254
11240866	11241366	AT1G31380	NA	1	11240450	11241099	1.50958	0.906521	11240866	11241366	AT1G31370	NA	1	11238297	11239363	0.931671	0.761768	1429	1	11238928	11239428	+	134	interaction22275	1938	33	0.070445	0	15	0.070445	1500	-29.7932	1138	101	-11.0729	1800	-34	NA	NA	NA	NA
24909541	24910041	AT1G66780	Yes	1	24909212	24911485	2.55491	5.44346	24909541	24910041	AT1G66760	Yes	1	24901977	24904443	1.06129	1.40988	1736	1	24902031	24902531	+	1199	interaction47250	7510	16	0.101253	0	3	0.084373	250.477	-2.52288	1301	1254	-11.0707	862.685	-12	-0.238764	0.923187	0.0376061	0.963261
4125014	4125514	AT1G12150	NA	1	4123529	4125648	0.777789	0.422062	4125014	4125514	AT1G12130	NA	1	4118593	4120871	1.23634	1.07835	1581	1	4118503	4119003	+	350	interaction7917	6511	43	0.070445	0	21	0.070445	2100	-46.9872	1475	299	-11.0558	2200	-48	-0.140244	0.84249	0.312915	0.731104
5829534	5830034	AT1G17050	NA	1	5829079	5831343	1.08766	0.480506	5829534	5830034	AT1G17040	Yes	1	5824847	5828233	0.621548	0.361127	940	1	5827596	5828096	+	62	interaction11700	1938	11	0.070445	0.001739	2	0.070445	200	-1.33101	878	32	-11.023	900	-6	-1.19354	2.35e-32	-0.272324	0.228769
5525548	5526048	AT1G16130	Yes	1	5525490	5528212	0.664942	1.0335	5525548	5526048	AT1G16110	NA	1	5518372	5520891	0.59992	0.52353	544	1	5519507	5520007	+	351	interaction11244	6041	16	0.070445	0	4	0.070445	400	-3.97431	424	313	-11.0084	1200	-12	-0.109805	0.924566	0.230916	0.310091
7942529	7943029	AT2G18260	Yes	2	7942152	7943388	0.637059	2.00959	7942529	7943029	AT2G18250	Yes	2	7939906	7941678	0.663682	0.321437	303	2	7940847	7941347	+	633	interaction64783	1682	25	0.070445	0	9	0.070445	900	-13.7959	292	555	-11.0065	1600	-22	-0.193759	0.363476	0.326906	0.0293195
7260130	7260630	AT1G20870	Yes	1	7259101	7260775	0.563682	0.63953	7260130	7260630	AT1G20860	Yes	1	7254006	7258677	1.27221	2.01769	718	1	7257569	7258069	+	995	interaction13794	2561	30	0.070445	0	12	0.070445	1200	-21.0145	523	787	-10.9756	1800	-28	-0.938668	0.00140296	-0.346063	0.881086
1067056	1067556	AT2G03510	NA	2	1066605	1069149	0.589613	0.433347	1067056	1067556	AT2G03505	Yes	2	1064235	1065372	0.824789	3.11773	119	2	1064442	1064942	+	1578	interaction60163	2614	30	0.070445	0	13	0.070445	1300	-24.2238	94	1394	-10.9702	1700	-30	-0.0159224	0.932281	-0.0398169	0.945329
19388602	19389102	AT1G52110	NA	1	19386788	19389740	2.70864	3.46952	19388602	19389102	AT1G52100	NA	1	19383121	19385602	2.29966	2.9373	901	1	19383503	19384003	+	487	interaction31836	5099	16	0.070445	0	4	0.070445	400	-3.97193	695	406	-10.9652	1200	-12	0.787206	0.42706	1.36521	3.02e-14
12319535	12320035	AT1G33920	NA	1	12319904	12320870	2.4203	2.75156	12319535	12320035	AT1G33900	NA	1	12311517	12313518	1.83889	3.42226	906	1	12312090	12312590	+	1113	interaction24417	7445	18	0.070445	0	5	0.070445	500	-5.62008	647	919	-10.9329	1300	-14	NA	NA	3.65423	NA
12312452	12312952	AT1G33900	NA	1	12311517	12313518	1.83889	3.42226	12312452	12312952	AT1G33880	NA	1	12303861	12304911	2.36799	3.31694	794	1	12304045	12304545	+	1509	interaction24281	8407	18	0.070445	0	5	0.070445	500	-5.61934	700	1291	-10.9247	1300	-14	3.65423	NA	0.246771	NA
13116000	13116500	AT1G35560	NA	1	13115825	13117235	0.755262	0.564097	13116000	13116500	AT1G35530	NA	1	13089868	13097078	0.522229	0.394145	1417	1	13096630	13097130	+	24	interaction25807	19370	8	0.070445	0.908399	1	0.070445	100	-0.435809	1537	13	-10.9237	700	-4	-0.702618	3.48e-05	-0.689522	0.0107186
8955394	8955894	AT2G20800	Yes	2	8953251	8955761	0.87043	1.07648	8955394	8955894	AT2G20790	NA	2	8949927	8952744	0.503316	0.381899	1960	2	8951051	8951551	+	85	interaction66463	4343	26	0.070445	0	11	0.070445	1100	-19.3284	1645	54	-10.9219	1500	-26	-0.20747	0.921011	0.124539	0.327936
7387922	7388422	AT1G21100	Yes	1	7386838	7388428	1.0419	1.73374	7387922	7388422	AT1G21090	Yes	1	7384628	7386558	0.824931	2.34001	1745	1	7385531	7386031	+	279	interaction13918	2391	74	0.070445	0	46	0.070445	4600	-138.503	1512	233	-10.9041	2800	-100	1.03541	1.06e-10	-0.0353905	0.898503
7498569	7499069	AT1G21410	NA	1	7497140	7499579	0.723935	0.508288	7498569	7499069	AT1G21400	NA	1	7493425	7496710	0.726715	0.482297	119	1	7494005	7494505	+	1756	interaction14604	4564	24	0.070445	0	9	0.070445	900	-14.0295	89	1993	-10.8646	1500	-22	-0.575626	8.97e-05	1.05703	0.0531519
15162402	15162902	AT2G36110	NA	2	15161701	15162676	4.59926	4.59456	15162402	15162902	AT2G36090	NA	2	15158560	15159639	1.0094	1.35171	1711	2	15158954	15159454	+	368	interaction80046	3448	43	0.070445	0	21	0.070445	2100	-46.7977	1441	418	-10.8104	2200	-48	1.62879	0.0221785	-0.41862	0.218782
4261412	4261912	AT1G12490	Yes	1	4260782	4261869	3.59788	7.92622	4261412	4261912	AT1G12480	Yes	1	4257267	4259300	0.797023	0.848905	1543	1	4257951	4258451	+	82	interaction8420	3461	17	0.070445	0	5	0.070445	500	-5.72915	1429	55	-10.8055	1200	-14	-2.42453	0.0477967	-0.664603	0.0118379
21101508	21102008	AT1G56380	NA	1	21101326	21102701	2.32238	4.19863	21101508	21102008	AT1G56350	NA	1	21094777	21097988	0.744935	0.478378	1012	1	21095452	21095952	+	1402	interaction35996	6056	33	0.070445	0	14	0.070445	1400	-26.2187	821	1105	-10.7686	1900	-34	NA	NA	0.151302	0.415936
28504010	28504510	AT1G75920	NA	1	28504451	28507168	2.05779	2.68495	28504010	28504510	AT1G75910	NA	1	28501433	28503283	3.17032	6.01562	78	1	28501548	28502048	+	1400	interaction55419	2462	17	0.070445	0	5	0.070445	500	-5.72482	57	1274	-10.7549	1200	-14	-2.05492	0.0252523	-0.896869	NA
1698512	1699012	AT2G04842	NA	2	1698465	1701271	0.702943	0.500796	1698512	1699012	AT2G04810	NA	2	1688772	1689966	3.34211	4.41319	116	2	1689046	1689546	+	1230	interaction61104	9466	19	0.070445	0	6	0.070445	600	-7.56141	80	1041	-10.7473	1300	-16	-0.280569	0.0712137	NA	NA
9912969	9913469	AT1G28310	NA	1	9911897	9913837	3.24706	5.17509	9912969	9913469	AT1G28300	NA	1	9896866	9899876	4.16832	4.92363	1676	1	9899470	9899970	+	285	interaction19370	13499	23	0.070445	0	8	0.070445	800	-11.577	1395	244	-10.7136	1500	-20	-0.107553	0.718309	-0.356998	0.816798
23386006	23386506	AT1G63070	NA	1	23385323	23387167	2.21823	3.77694	23386006	23386506	AT1G63057	NA	1	23379664	23382989	1.84249	1.96361	1270	1	23382471	23382971	+	183	interaction41686	3535	29	0.070445	0	12	0.070445	1200	-21.2759	993	155	-10.6977	1700	-28	2.23871	NA	2.47732	0.025702
6839089	6839589	AT1G19790	NA	1	6838119	6840293	5.57509	8.6564	6839089	6839589	AT1G19770	NA	1	6832346	6833837	0.706719	0.479659	1327	1	6832982	6833482	+	133	interaction12943	6107	21	0.070445	0	7	0.070445	700	-9.51347	1248	131	-10.6958	1400	-18	0.768401	0.00527529	0.613226	0.0113907
15949435	15949935	AT2G38100	Yes	2	15948483	15950228	0.873626	2.16938	15949435	15949935	AT2G38090	Yes	2	15944710	15947085	0.745434	3.4891	66	2	15945485	15945985	+	1136	interaction81243	3950	11	0.070445	0.001824	2	0.070445	200	-1.33095	45	1135	-10.6859	900	-6	-0.235713	0.80667	-0.409695	0.0392793
22958540	22959040	AT1G62110	NA	1	22957875	22959711	0.659973	0.397198	22958540	22959040	AT1G62085	Yes	1	22948756	22950142	0.654714	0.644425	76	1	22949523	22950023	+	1661	interaction40822	9017	15	0.070445	0	4	0.070445	400	-4.03697	46	1604	-10.6789	1100	-10	0.0286171	0.941291	-0.60439	0.000158135
5695107	5695607	AT2G13680	Yes	2	5694397	5706134	0.844517	0.868894	5695107	5695607	AT2G13623	NA	2	5682061	5682304	1.42088	1.22771	1685	2	5682034	5682534	+	36	interaction61672	13073	8	0.070445	1	1	0.070445	100	-0.438915	1336	15	-10.6659	700	-4	-0.0719405	0.927229	NA	NA
3236985	3237485	AT1G09940	NA	1	3236994	3239554	0.732784	0.434901	3236985	3237485	AT1G09932	Yes	1	3230449	3233109	2.99333	3.26614	97	1	3232963	3233463	+	1136	interaction6130	4022	19	0.070445	0	6	0.070445	600	-7.54487	91	1088	-10.6154	1300	-16	0.430286	0.0466029	1.05558	0.00205406
1803502	1804002	AT1G05940	NA	1	1801161	1803984	0.738065	0.399968	1803502	1804002	AT1G05910	Yes	1	1790223	1796647	0.709238	0.483841	1825	1	1793424	1793924	+	246	interaction3951	10078	21	0.070445	0	7	0.070445	700	-9.49328	2010	157	-10.5758	1400	-18	0.0943089	0.480138	-0.0772658	0.655378
22686440	22686940	AT1G61490	NA	1	22685153	22688267	0.600333	0.431371	22686440	22686940	AT1G61480	NA	1	22681315	22684475	0.679225	0.437318	183	1	22683529	22684029	+	1913	interaction39912	2911	27	0.070445	0	11	0.070445	1100	-18.837	112	1413	-10.544	1600	-26	0.264057	0.316509	0.192736	0.619082
5381944	5382444	AT1G15660	Yes	1	5381169	5385254	0.729471	0.416196	5381944	5382444	AT1G15640	Yes	1	5378885	5380139	1.37098	5.86198	137	1	5378928	5379428	+	1063	interaction11131	3016	11	0.070445	0.002534	2	0.070445	200	-1.33092	61	1060	-10.4847	900	-6	-0.0186773	0.935999	-0.963696	0.159882
3549999	3550499	AT1G10690	Yes	1	3549991	3550632	0.619098	4.62222	3549999	3550499	AT1G10680	Yes	1	3538469	3543782	0.928504	2.83433	1316	1	3540008	3540508	+	67	interaction6683	9991	11	0.070445	0.001844	2	0.070445	200	-1.33092	1280	62	-10.4758	900	-6	-0.92647	4.3e-06	-0.736347	0.568266
1575494	1575994	AT2G04520	NA	2	1574591	1575863	0.695212	0.39955	1575494	1575994	AT2G04495	NA	2	1564165	1565106	1.41091	1.74822	71	2	1564964	1565464	+	1417	interaction60955	10530	11	0.070445	0.001918	2	0.070445	200	-1.33092	62	1320	-10.4758	900	-6	0.0278453	0.88908	0.536344	0.680535
9280870	9281370	AT2G21730	Yes	2	9280043	9281623	1.47657	4.99706	9280870	9281370	AT2G21720	NA	2	9273695	9276802	2.25364	3.38964	972	2	9274046	9274546	+	100	interaction66886	6824	11	0.070445	0.002288	2	0.070445	200	-1.33092	646	62	-10.4758	900	-6	-2.52864	1.14e-05	-2.09209	NA
2282103	2282603	AT1G07430	NA	1	2280834	2282828	2.18823	3.27763	2282103	2282603	AT1G07410	NA	1	2276052	2277154	0.710399	0.437968	1403	1	2276143	2276643	+	74	interaction4719	5960	11	0.070445	0.001969	2	0.070445	200	-1.33092	1428	63	-10.4673	900	-6	-2.43501	2.79e-07	0.156511	0.63461
247501	248001	AT1G01680	Yes	1	246410	248367	1.48564	8.18327	247501	248001	AT1G01650	NA	1	232840	237817	0.720712	0.381803	1080	1	235566	236066	+	100	interaction536	11935	11	0.070445	0.002288	2	0.070445	200	-1.33092	1047	65	-10.451	900	-6	-0.335595	0.76541	0.295412	0.0437626
19553498	19553998	AT1G52470	NA	1	19553212	19555543	2.48127	3.44094	19553498	19553998	AT1G52450	NA	1	19541683	19546266	0.651723	0.501772	1069	1	19544538	19545038	+	135	interaction32246	8960	11	0.070445	0.002525	2	0.070445	200	-1.33092	903	66	-10.4433	900	-6	0.747547	NA	0.297738	0.425519
20280525	20281025	AT1G54330	NA	1	20279566	20280952	4.73371	7.45773	20280525	20281025	AT1G54310	NA	1	20273566	20275574	0.70595	0.409396	1283	1	20273601	20274101	+	74	interaction34007	6924	11	0.070445	0.001969	2	0.070445	200	-1.33092	1255	67	-10.4358	900	-6	-0.552433	0.528216	0.141034	0.34858
14516955	14517455	AT2G34400	NA	2	14516225	14518186	0.535073	0.408905	14516955	14517455	AT2G34370	NA	2	14510481	14511891	2.34583	3.28578	100	2	14511403	14511903	+	1729	interaction78282	5552	11	0.070445	0.002288	2	0.070445	200	-1.33092	67	1316	-10.4358	900	-6	0.486308	0.00933555	-0.862446	NA
1568536	1569036	AT2G04500	Yes	2	1568283	1570271	1.53179	2.48083	1568536	1569036	AT2G04495	NA	2	1564165	1565106	1.41091	1.74822	121	2	1563929	1564429	+	991	interaction60928	4607	25	0.070445	0	10	0.070445	1000	-16.4756	82	981	-10.4313	1500	-24	-0.318399	0.642034	0.536344	0.680535
7756016	7756516	AT1G22020	NA	1	7754320	7757383	0.776194	0.51849	7756016	7756516	AT1G22015	NA	1	7751001	7753519	2.20122	3.33419	135	1	7752163	7752663	+	901	interaction15048	3853	19	0.070445	0	6	0.070445	600	-7.52083	114	810	-10.4296	1300	-16	0.138032	0.297271	NA	NA
12978065	12978565	AT2G30460	NA	2	12976145	12978868	0.750734	0.369593	12978065	12978565	AT2G30432	NA	2	12968614	12970209	0.717028	0.537926	74	2	12968426	12968926	+	1082	interaction74251	9639	11	0.070445	0.001969	2	0.070445	200	-1.33092	69	1133	-10.4216	900	-6	-0.462619	0.00384002	-0.528726	0.231489
27890471	27890971	AT1G74160	NA	1	27886425	27891431	0.694748	0.405587	27890471	27890971	AT1G74140	Yes	1	27876904	27879780	1.24707	3.85648	96	1	27877397	27877897	+	1294	interaction54040	13074	11	0.070445	0.002249	2	0.070445	200	-1.33092	70	1103	-10.4148	900	-6	-0.425506	0.00407319	-0.894504	NA
7565462	7565962	AT2G17420	NA	2	7564344	7566539	0.686594	0.373179	7565462	7565962	AT2G17410	NA	2	7558976	7563752	0.757366	0.408301	1716	2	7561479	7561979	+	83	interaction63841	3983	11	0.070445	0.002102	2	0.070445	200	-1.33092	1366	74	-10.3895	900	-6	0.197528	0.0660054	0.0075279	0.966695
9841075	9841575	AT1G28170	Yes	1	9841331	9842312	2.13733	3.31286	9841075	9841575	AT1G28140	NA	1	9832815	9834427	0.702404	0.381149	1178	1	9833508	9834008	+	85	interaction19215	7567	11	0.070445	0.002127	2	0.070445	200	-1.33091	1104	75	-10.3837	900	-6	1.25106	NA	-0.257543	0.0129332
24466535	24467035	AT1G65780	Yes	1	24462957	24466888	1.59285	3.26215	24466535	24467035	AT1G65760	NA	1	24458590	24459715	2.4847	3.27925	1630	1	24458511	24459011	+	915	interaction45050	8024	31	0.072552	0	13	0.070445	1300	-23.5707	1403	725	-10.3808	1709.96	-30	1.16326	NA	0.839807	0.343017
23993558	23994058	AT1G64590	NA	1	23993532	23995509	2.59685	3.78441	23993558	23994058	AT1G64580	NA	1	23984789	23986731	0.652046	0.486078	1803	1	23985454	23985954	+	74	interaction43148	8104	15	0.070445	0	4	0.070445	400	-4.01941	1397	60	-10.3608	1100	-10	-0.096681	0.816421	0.178948	0.411494
14787504	14788004	AT2G35075	Yes	2	14786681	14789023	0.783201	0.553873	14787504	14788004	AT2G35070	NA	2	14783290	14784710	3.07414	3.8589	598	2	14783475	14783975	+	97	interaction78936	4029	17	0.070445	0	5	0.070445	500	-5.68898	460	82	-10.3554	1200	-14	-0.244059	0.477637	-0.548902	0.194641
6664564	6665064	AT2G15318	NA	2	6664759	6665029	1.40321	1.46425	6664564	6665064	AT2G15310	Yes	2	6653790	6655501	1.64303	2.9502	1628	2	6653456	6653956	+	67	interaction62558	11108	24	0.070445	0	10	0.070445	1000	-16.7824	1647	51	-10.3462	1400	-22	-0.26347	0.871591	-0.589146	0.0347187
8878424	8878924	AT1G25320	NA	1	8877856	8880310	0.931833	0.486092	8878424	8878924	AT1G25300	NA	1	8871567	8872386	3.44533	6.64331	1925	1	8872006	8872506	+	113	interaction17515	6418	17	0.070445	0	5	0.070445	500	-5.68801	1470	83	-10.345	1200	-12	0.280395	0.0690669	NA	NA
25405579	25406079	AT1G67760	NA	1	25405579	25406372	4.92351	6.24525	25405579	25406079	AT1G67740	NA	1	25394067	25395154	0.929616	0.351693	1732	1	25394500	25395000	+	97	interaction48481	11079	11	0.070445	0.002259	2	0.070445	200	-1.33091	1542	83	-10.3421	900	-6	0.57102	0.388069	-0.355735	0.014104
18488120	18488620	AT1G49940	Yes	1	18488359	18491179	0.677371	0.843858	18488120	18488620	AT1G49900	Yes	1	18473907	18477643	0.707648	1.76143	1773	1	18477465	18477965	+	109	interaction29293	10655	11	0.070445	0.002363	2	0.070445	200	-1.33091	1364	84	-10.3375	900	-6	-0.330008	0.257968	-1.95769	0.000654857
9850479	9850979	AT1G28200	NA	1	9850146	9852366	0.784305	0.389801	9850479	9850979	AT1G28170	Yes	1	9841331	9842312	2.13733	3.31286	68	1	9841456	9841956	+	1589	interaction19270	9023	13	0.070445	1.1e-05	3	0.070445	300	-2.5442	53	1298	-10.3345	1000	-8	0.324655	0.0331147	1.25106	NA
19940551	19941051	AT1G53430	NA	1	19935162	19941088	0.634469	0.405538	19940551	19941051	AT1G53420	NA	1	19926625	19931494	1.09053	0.709396	84	1	19930894	19931394	+	1041	interaction33180	9657	13	0.070445	1.3e-05	3	0.070445	300	-2.5442	53	1018	-10.3345	1000	-8	0.307656	0.241917	0.535615	0.812616
13843527	13844027	AT2G32620	NA	2	13840743	13844324	1.88157	2.0553	13843527	13844027	AT2G32610	NA	2	13836233	13839513	2.22582	2.75918	140	2	13836141	13836641	+	936	interaction76525	7386	11	0.070445	0.002549	2	0.070445	200	-1.33091	92	941	-10.3045	900	-6	0.734513	0.324745	0.422206	0.37955
122370	122870	AT1G01320	NA	1	121066	130577	0.763976	0.419817	122370	122870	AT1G01305	NA	1	119396	119997	0.786949	0.653017	100	1	119596	120096	+	1032	interaction197	2774	11	0.070445	0.002288	2	0.070445	200	-1.33091	94	1062	-10.2971	900	-6	-0.684542	1.79e-05	NA	NA
10316422	10316922	AT2G24255	Yes	2	10315514	10317353	3.13033	5.9309	10316422	10316922	AT2G24240	NA	2	10310647	10312328	0.566934	0.469709	836	2	10312038	10312538	+	103	interaction68572	4384	11	0.070445	0.002315	2	0.070445	200	-1.33091	672	95	-10.2936	900	-6	0.573738	NA	-0.472148	0.0100299
10191015	10191515	AT1G29170	NA	1	10190213	10194900	0.683657	0.468059	10191015	10191515	AT1G29160	NA	1	10183796	10184324	3.06765	2.80354	238	1	10183571	10184071	+	1827	interaction20168	7444	24	0.070445	0	9	0.070445	900	-13.8874	153	1843	-10.2908	1500	-22	-0.466731	0.0592301	0.38462	0.087475
4394561	4395061	AT1G12910	NA	1	4394896	4396291	0.649206	0.398163	4394561	4395061	AT1G12855	NA	1	4382159	4383611	1.09997	0.902418	113	1	4382515	4383015	+	1221	interaction8786	12046	11	0.070445	0.002392	2	0.070445	200	-1.33091	98	1104	-10.2834	900	-6	0.372793	0.0114045	-0.875907	0.640024
8116396	8116896	AT2G18720	Yes	2	8114919	8116811	1.65383	3.19288	8116396	8116896	AT2G18700	NA	2	8109042	8112010	0.708769	0.410293	1201	2	8111494	8111994	+	133	interaction65480	4902	11	0.070445	0.002515	2	0.070445	200	-1.33091	1118	98	-10.2834	900	-6	0.15195	0.909398	0.105374	0.788079
11405600	11406100	AT2G26770	NA	2	11404065	11408326	0.784205	0.439336	11405600	11406100	AT2G26740	NA	2	11392964	11394279	0.796731	0.668488	76	2	11393440	11393940	+	1946	interaction70309	12160	13	0.070445	1.2e-05	3	0.070445	300	-2.5426	57	1840	-10.2728	1000	-8	-0.531499	1.09e-05	0.31161	0.222245
6998981	6999481	AT1G20190	Yes	1	6998488	6999817	0.636893	1.40031	6998981	6999481	AT1G20160	NA	1	6990783	6993972	0.657234	0.602381	1956	1	6990401	6990901	+	122	interaction13425	8580	11	0.070445	0.002452	2	0.070445	200	-1.3309	1978	103	-10.2678	900	-6	-2.05694	1.04e-16	-0.290651	0.129765
10345059	10345559	AT1G29600	Yes	1	10344045	10346243	0.778604	1.1368	10345059	10345559	AT1G29590	NA	1	10339936	10342848	0.74978	0.50201	97	1	10340768	10341268	+	642	interaction20725	4291	11	0.070445	0.002259	2	0.070445	200	-1.3309	105	505	-10.262	900	-6	-2.86309	1.26e-29	0.187315	0.507287
7727030	7727530	AT2G17780	Yes	2	7724884	7727404	0.982019	1.2883	7727030	7727530	AT2G17770	Yes	2	7723102	7724323	0.675133	1.71342	907	2	7723350	7723850	+	73	interaction64058	3680	13	0.070445	1.2e-05	3	0.070445	300	-2.54223	1011	58	-10.2589	1000	-8	-0.346854	0.215336	-1.0576	0.00328093
24281522	24282022	AT1G65360	Yes	1	24281336	24282151	1.71668	1.78243	24281522	24282022	AT1G65350	NA	1	24272517	24277275	2.8447	2.39499	1747	1	24275985	24276485	+	227	interaction44128	5537	11	0.070445	0.002824	2	0.070445	200	-1.3309	1379	117	-10.2315	900	-6	0.747547	NA	-0.508652	0.6685
7436426	7436926	AT2G17090	Yes	2	7435087	7437298	2.61823	3.6545	7436426	7436926	AT2G17070	Yes	2	7430862	7431654	2.20804	4.07808	1693	2	7431448	7431948	+	230	interaction63646	4978	30	0.070445	0	13	0.070445	1300	-23.9179	1270	156	-10.2294	1700	-30	NA	NA	0.28908	0.728012
7484062	7484562	AT1G21370	NA	1	7483780	7485666	0.818736	0.443377	7484062	7484562	AT1G21326	Yes	1	7469001	7469721	1.64849	2.09023	143	1	7469521	7470021	+	1410	interaction14560	14541	11	0.070445	0.002564	2	0.070445	200	-1.3309	123	1414	-10.2186	900	-6	0.256123	0.141331	1.51725	0.00227691
19761941	19762441	AT1G53035	NA	1	19761699	19762551	0.585183	0.408907	19761941	19762441	AT1G53025	Yes	1	19756823	19759623	0.736094	0.906853	142	1	19758160	19758660	+	679	interaction32793	3781	11	0.070445	0.002559	2	0.070445	200	-1.3309	123	646	-10.2186	900	-6	-0.36743	0.335681	-0.341647	0.0602024
22734577	22735077	AT1G61610	Yes	1	22733471	22736509	0.725686	0.71894	22734577	22735077	AT1G61580	NA	1	22720691	22723152	0.834889	0.500538	121	1	22722485	22722985	+	1558	interaction40226	12092	15	0.070445	0	4	0.070445	400	-4.01059	71	1569	-10.209	1100	-10	-1.47425	0.011292	0.280474	0.0814586
22119572	22120072	AT1G60040	Yes	1	22119074	22119929	2.59868	8.83191	22119572	22120072	AT1G60030	Yes	1	22113840	22116845	0.839907	1.85374	995	1	22115004	22115504	+	132	interaction38606	4568	15	0.070445	0	4	0.070445	400	-4.00993	887	72	-10.1977	1100	-10	-1.17601	NA	-1.67421	3.12e-05
5821513	5822013	AT1G17020	Yes	1	5820205	5822013	0.879888	3.67389	5821513	5822013	AT1G17000	Yes	1	5812727	5816662	1.51032	2.09837	86	1	5812513	5813013	+	1472	interaction11659	9000	13	0.070445	1.4e-05	3	0.070445	300	-2.54059	63	1296	-10.1966	1000	-8	-1.43876	2.04e-09	1.73974	NA
10814516	10815016	AT2G25410	NA	2	10814469	10815994	0.87417	0.533487	10814516	10815016	AT2G25360	Yes	2	10804248	10805761	1.8947	1.84538	96	2	10804961	10805461	+	1862	interaction69508	9555	13	0.070445	1.5e-05	3	0.070445	300	-2.54059	63	1462	-10.1966	1000	-8	0.821821	0.329169	NA	NA
10073402	10073902	AT1G28660	Yes	1	10071711	10073411	1.15283	1.80051	10073402	10073902	AT1G28630	NA	1	10058455	10063460	1.40863	1.17779	36	1	10063059	10063559	+	2006	interaction19883	10343	8	0.070445	1	1	0.070445	100	-0.445282	22	1994	-10.1964	700	-4	0.319799	0.075634	2.61209	NA
26414679	26415179	AT1G70140	Yes	1	26412687	26415230	0.677484	6.52478	26414679	26415179	AT1G70100	NA	1	26403082	26406119	0.812319	0.429385	1829	1	26403581	26404081	+	151	interaction50917	11098	11	0.070445	0.002599	2	0.070445	200	-1.3309	1823	135	-10.1963	900	-6	-1.7413	1.96e-14	0.0917189	0.677583
3958102	3958602	AT1G11730	NA	1	3957472	3960113	0.802588	0.590908	3958102	3958602	AT1G11720	NA	1	3951552	3957044	0.761777	0.437898	809	1	3954599	3955099	+	104	interaction7636	3503	13	0.070445	1.5e-05	3	0.070445	300	-2.54029	665	64	-10.1855	1000	-8	-0.163382	0.713961	-0.279352	0.0916483
7754551	7755051	AT1G22020	NA	1	7754320	7757383	0.776194	0.51849	7754551	7755051	AT1G22000	Yes	1	7744188	7747785	1.13807	1.86249	168	1	7744405	7744905	+	1034	interaction15031	10146	11	0.070445	0.002664	2	0.070445	200	-1.3309	142	673	-10.1851	900	-6	0.138032	0.297271	-0.479327	NA
8412989	8413489	AT1G23800	NA	1	8412050	8414879	0.742387	0.587083	8412989	8413489	AT1G23790	NA	1	8409962	8412041	0.597205	0.45915	178	1	8410407	8410907	+	827	interaction16623	2582	22	0.070445	0	8	0.070445	800	-11.7067	101	769	-10.185	1400	-18	-0.700102	2.96e-06	-0.472211	0.0541915
15005007	15005507	AT2G35700	NA	2	15005204	15005789	2.87187	2.85197	15005007	15005507	AT2G35690	NA	2	14999753	15003066	0.720801	0.413852	106	2	15000489	15000989	+	659	interaction79361	4518	11	0.070445	0.002339	2	0.070445	200	-1.3309	143	665	-10.1836	900	-6	0.00116105	0.997803	0.382672	0.0229607
6992945	6993445	AT1G20160	NA	1	6990783	6993972	0.657234	0.602381	6992945	6993445	AT1G20132	Yes	1	6981263	6983627	1.59505	2.40178	144	1	6982072	6982572	+	1996	interaction13391	10873	17	0.070445	0	5	0.070445	500	-5.67261	103	1594	-10.1834	1200	-12	-0.290651	0.129765	NA	NA
6988491	6988991	AT1G20150	Yes	1	6987331	6990361	0.667106	1.85089	6988491	6988991	AT1G20120	Yes	1	6975387	6977264	1.21224	1.34913	172	1	6975602	6976102	+	1268	interaction13353	12889	11	0.070445	0.002678	2	0.070445	200	-1.3309	146	1077	-10.1792	900	-6	-1.8409	NA	-0.407738	0.367018
4823925	4824425	AT1G14080	NA	1	4822527	4824414	0.76331	0.511559	4823925	4824425	AT1G14040	NA	1	4810487	4814543	1.12937	1.23661	102	1	4810501	4811001	+	1732	interaction9732	13424	13	0.070445	1.5e-05	3	0.070445	300	-2.54	65	1750	-10.1747	1000	-8	0.528662	0.0416994	0.146236	0.561492
29692382	29692882	AT1G78955	Yes	1	29689152	29694255	1.02331	0.898891	29692382	29692882	AT1G78950	Yes	1	29684431	29688673	0.744121	0.525732	1095	1	29684973	29685473	+	93	interaction57723	7409	13	0.070445	1.4e-05	3	0.070445	300	-2.54	944	65	-10.1747	1000	-8	-0.134595	0.804581	-0.535283	0.0652952
15294579	15295079	AT2G36450	NA	2	15294302	15294857	5.8772	8.19657	15294579	15295079	AT2G36430	Yes	2	15290203	15291763	0.917467	1.66803	150	2	15290100	15290600	+	832	interaction80213	4479	17	0.070445	0	5	0.070445	500	-5.67081	106	972	-10.1649	1200	-12	0.7278	NA	-0.756708	2.92e-05
15208943	15209443	AT2G36290	NA	2	15208626	15210845	0.841977	0.381688	15208943	15209443	AT2G36261	NA	2	15203903	15204146	1.11426	1.47972	91	2	15203791	15204291	+	1011	interaction80172	5152	13	0.070445	1.4e-05	3	0.070445	300	-2.53972	66	821	-10.1643	1000	-8	-0.245396	0.0395049	NA	NA
11893000	11893500	AT2G27930	NA	2	11892368	11893488	2.24431	2.59009	11893000	11893500	AT2G27920	NA	2	11885570	11889176	0.738988	0.520261	80	2	11888986	11889486	+	824	interaction71268	4014	13	0.070445	1.3e-05	3	0.070445	300	-2.53945	67	890	-10.1542	1000	-8	0.222804	0.680972	-0.587554	0.000908149
24359482	24359982	AT1G65510	NA	1	24359452	24360081	1.29463	0.785013	24359482	24359982	AT1G65484	NA	1	24347749	24348609	2.00489	3.00494	1117	1	24348530	24349030	+	171	interaction44525	10952	11	0.070445	0.002674	2	0.070445	200	-1.3309	1225	169	-10.1508	900	-6	0.0969639	0.797674	1.13934	0.128367
12011561	12012061	AT2G28180	Yes	2	12010993	12013890	1.73877	2.41404	12011561	12012061	AT2G28170	Yes	2	12006370	12009956	1.48368	2.04131	258	2	12008987	12009487	+	258	interaction71544	2574	11	0.070445	0.002883	2	0.070445	200	-1.3309	205	179	-10.1408	900	-6	-1.95047	NA	NA	NA
3930932	3931432	AT1G11670	NA	1	3928161	3931576	1.33437	1.3781	3930932	3931432	AT1G11660	NA	1	3920542	3924555	0.779993	0.40111	1530	1	3923006	3923506	+	90	interaction7555	7926	18	0.070445	0	6	0.070445	600	-7.65499	1294	48	-10.139	1200	-14	-0.202316	0.227628	0.186293	0.207712
19255990	19256490	AT1G51850	Yes	1	19252846	19256783	1.93326	2.87204	19255990	19256490	AT1G51820	NA	1	19237406	19241883	1.82978	2.35103	1786	1	19237521	19238021	+	205	interaction31221	18469	11	0.070445	0.002773	2	0.070445	200	-1.3309	1700	183	-10.1371	900	-6	0.78237	1.91e-05	0.967908	0.489166
19673065	19673565	AT1G52830	NA	1	19672495	19673644	2.48953	3.43224	19673065	19673565	AT1G52820	NA	1	19669182	19670427	0.696905	0.347741	508	1	19669972	19670472	+	119	interaction32509	3093	15	0.070445	0	4	0.070445	400	-4.00631	419	78	-10.1369	1100	-10	1.96577	0.0188516	-2.33092	0.000242632
23205475	23205975	AT1G62670	NA	1	23204772	23206665	0.808544	0.47037	23205475	23205975	AT1G62660	NA	1	23199717	23203765	1.32546	1.02901	317	1	23203493	23203993	+	95	interaction41294	1982	13	0.070445	1.5e-05	3	0.070445	300	-2.53869	224	70	-10.1258	1000	-8	0.226047	0.338486	0.255952	0.214399
20283115	20283615	AT1G54340	NA	1	20283479	20286786	0.638452	0.533765	20283115	20283615	AT1G54310	NA	1	20273566	20275574	0.70595	0.409396	1575	1	20274541	20275041	+	152	interaction34032	8574	17	0.070445	0	5	0.070445	500	-5.66649	1884	114	-10.1206	1200	-12	0.179032	0.100946	0.141034	0.34858
1736466	1736966	AT1G05790	NA	1	1732870	1737489	0.762919	0.390548	1736466	1736966	AT1G05785	NA	1	1730248	1732626	0.579905	0.486737	113	1	1730607	1731107	+	1442	interaction3828	5859	13	0.070445	1.6e-05	3	0.070445	300	-2.53844	71	1262	-10.1169	1000	-8	0.106822	0.430299	-0.0336275	0.887314
7472033	7472533	AT1G21327	NA	1	7471946	7472210	2.36856	2.23284	7472033	7472533	AT1G21326	Yes	1	7469001	7469721	1.64849	2.09023	141	1	7469097	7469597	+	1441	interaction14522	2936	25	0.070445	0	10	0.070445	1000	-16.3807	102	1582	-10.1104	1500	-24	NA	NA	1.51725	0.00227691
10898508	10899008	AT1G30720	Yes	1	10898171	10899912	2.30267	3.35348	10898508	10899008	AT1G30710	Yes	1	10895279	10897109	2.48823	6.94963	141	1	10895068	10895568	+	550	interaction21760	3440	22	0.070445	0	8	0.070445	800	-11.6902	109	557	-10.1096	1400	-20	1.68744	0.00535089	0.747547	NA
8249933	8250433	AT2G19040	NA	2	8249922	8250141	2.74593	4.54662	8249933	8250433	AT2G19010	NA	2	8243088	8245378	2.38525	3.10947	828	2	8242928	8243428	+	222	interaction65751	7005	11	0.070445	0.002813	2	0.070445	200	-1.33089	704	230	-10.1035	900	-6	NA	NA	NA	NA
12936570	12937070	AT1G35260	NA	1	12936848	12937787	2.70186	3.58703	12936570	12937070	AT1G35240	NA	1	12927456	12930523	0.732914	0.59195	903	1	12927561	12928061	+	122	interaction25307	9009	13	0.070445	1.7e-05	3	0.070445	300	-2.53798	741	73	-10.0999	1000	-8	0.0180423	0.949526	-0.419151	0.586822
26157919	26158419	AT1G69560	NA	1	26157754	26159094	4.59891	7.79105	26157919	26158419	AT1G69550	NA	1	26148020	26153555	0.825659	0.466001	125	1	26153465	26153965	+	1210	interaction50085	4454	13	0.070445	1.7e-05	3	0.070445	300	-2.53798	73	1436	-10.0999	1000	-8	-0.073077	0.968224	-0.493016	0.000683515
8413940	8414440	AT1G23800	NA	1	8412050	8414879	0.742387	0.587083	8413940	8414440	AT1G23760	Yes	1	8402045	8404301	1.56659	1.94244	1310	1	8403513	8404013	+	318	interaction16640	10427	11	0.070445	0.002969	2	0.070445	200	-1.33089	1182	249	-10.0936	900	-6	-0.700102	2.96e-06	0.240427	0.364056
24613072	24613572	AT1G66120	NA	1	24612619	24614805	3.64818	4.48704	24613072	24613572	AT1G66090	NA	1	24602145	24604763	2.02978	2.95221	1107	1	24602139	24602639	+	290	interaction45808	10933	11	0.070445	0.002933	2	0.070445	200	-1.33089	983	332	-10.0639	900	-6	NA	NA	-0.347278	0.508738
19556835	19557335	AT1G52490	NA	1	19556217	19559011	3.38097	6.1953	19556835	19557335	AT1G52460	NA	1	19549330	19551282	2.6233	3.39648	465	1	19550006	19550506	+	1036	interaction32303	6829	11	0.070445	0.003087	2	0.070445	200	-1.33089	388	858	-10.051	900	-6	NA	NA	NA	NA
13101017	13101517	AT2G30750	NA	2	13099335	13101413	2.22063	2.51885	13101017	13101517	AT2G30740	NA	2	13095975	13098594	0.725015	0.364538	1510	2	13097960	13098460	+	66	interaction74489	3057	18	0.070445	0	6	0.070445	600	-7.64097	1187	51	-10.0311	1200	-14	4.62437	2.23e-67	0.129688	0.454262
21944942	21945442	AT1G59722	NA	1	21944688	21945221	4.13882	5.40254	21944942	21945442	AT1G59700	NA	1	21936295	21937959	1.15235	1.3766	657	1	21936924	21937424	+	1207	interaction38041	8018	11	0.070445	0.003161	2	0.070445	200	-1.33089	575	1140	-10.0265	900	-6	NA	NA	-0.769562	5.26e-08
1920036	1920536	AT1G06280	NA	1	1920306	1920949	4.27789	7.34998	1920036	1920536	AT1G06270	NA	1	1918087	1919760	0.818952	0.456659	238	1	1918464	1918964	+	2000	interaction4284	1572	44	0.070445	0	23	0.070445	2300	-53.6471	222	1490	-10.0238	2100	-50	0.747547	NA	-0.162716	0.596974
16903064	16903564	AT2G40470	NA	2	16902303	16903652	3.5829	6.12333	16903064	16903564	AT2G40435	NA	2	16886823	16888638	2.64063	4.60539	831	2	16887527	16888027	+	766	interaction82810	15537	11	0.070445	0.003186	2	0.070445	200	-1.33089	622	905	-10.0226	900	-6	-0.163562	0.771116	-0.657388	0.0828374
23319490	23319990	AT1G62960	NA	1	23318186	23320316	0.560309	0.390472	23319490	23319990	AT1G62940	Yes	1	23310534	23312747	1.29451	1.23951	113	1	23310941	23311441	+	949	interaction41463	8549	15	0.070445	0	4	0.070445	400	-3.99934	93	689	-10.0222	1100	-10	-0.385557	0.00265637	1.53724	NA
12319531	12320031	AT1G33920	NA	1	12319904	12320870	2.4203	2.75156	12319531	12320031	AT1G33870	NA	1	12301324	12302467	2.07499	2.49211	906	1	12302134	12302634	+	1436	interaction24411	17397	11	0.070445	0.003209	2	0.070445	200	-1.33089	647	969	-10.0208	900	-6	NA	NA	-0.908908	0.605119
898961	899461	AT1G03600	NA	1	898875	899655	0.903039	0.671007	898961	899461	AT1G03560	NA	1	890155	892410	0.605737	0.331127	995	1	891490	891990	+	760	interaction1938	7471	11	0.070445	0.003185	2	0.070445	200	-1.33089	1034	722	-10.0162	900	-6	-0.354146	0.000866332	0.545073	0.00465398
24452524	24453024	AT1G65740	NA	1	24452095	24453211	3.49922	5.45005	24452524	24453024	AT1G65690	NA	1	24431429	24432953	1.64407	1.65625	898	1	24432456	24432956	+	1530	interaction44850	20068	11	0.070445	0.003208	2	0.070445	200	-1.33089	762	1560	-10.014	900	-6	NA	NA	1.08115	2.73e-06
25721036	25721536	AT1G68540	NA	1	25720023	25721410	0.653911	0.550809	25721036	25721536	AT1G68510	NA	1	25706881	25708255	3.41365	4.6544	193	1	25707476	25707976	+	1747	interaction49231	13560	17	0.070445	0	5	0.070445	500	-5.65557	141	1598	-10.0108	1200	-12	-0.573496	0.000562922	0.747547	NA
11311391	11311891	AT1G31580	NA	1	11311168	11311989	1.04844	0.722154	11311391	11311891	AT1G31540	Yes	1	11288451	11293753	1.07432	1.31161	926	1	11292961	11293461	+	1365	interaction22603	18430	11	0.070445	0.003211	2	0.070445	200	-1.33089	868	1359	-10.0094	900	-6	-0.690945	0.0220992	0.048948	0.870927
20937516	20938016	AT1G55970	NA	1	20932128	20938290	0.675743	0.446698	20937516	20938016	AT1G55940	NA	1	20922458	20925619	0.804669	0.673937	1164	1	20923950	20924450	+	1254	interaction35849	13566	11	0.071005	0.003239	2	0.070445	200	-1.33089	919	1024	-10.0075	891.313	-6	-0.360099	0.0554012	-0.552678	0.0766109
2631137	2631637	AT1G08340	Yes	1	2631067	2632871	0.732828	1.45335	2631137	2631637	AT1G08320	NA	1	2621903	2627848	1.99723	2.35141	1610	1	2622051	2622551	+	108	interaction5078	9086	13	0.070445	1.6e-05	3	0.070445	300	-2.53536	1282	87	-10.0046	1000	-8	-0.142616	0.600273	0.289935	0.105992
1737959	1738459	AT2G04940	NA	2	1736484	1740388	0.742776	0.450716	1737959	1738459	AT2G04920	NA	2	1726137	1727268	1.15126	0.909708	27	2	1726021	1726521	+	1800	interaction61196	11938	8	0.070445	1	1	0.070445	100	-0.44818	28	1440	-10.0041	700	-4	0.163117	0.227437	NA	NA
21641530	21642030	AT1G58330	NA	1	21641129	21642041	2.71016	4.33298	21641530	21642030	AT1G58310	NA	1	21631946	21633642	1.5672	1.25971	2085	1	21631498	21631998	+	406	interaction37075	10032	19	0.070445	0	6	0.070445	600	-7.46123	1975	316	-9.99716	1300	-16	1.38019	NA	-1.13989	NA
24431064	24431564	AT1G65690	NA	1	24431429	24432953	1.64407	1.65625	24431064	24431564	AT1G65670	NA	1	24421992	24423953	1.52919	1.48264	128	1	24423529	24424029	+	1546	interaction44771	7535	15	0.070445	0	4	0.070445	400	-3.9975	98	1262	-9.99242	1100	-10	1.08115	2.73e-06	-0.0877438	NA
10801424	10801924	AT2G25355	Yes	2	10801277	10803722	0.690813	0.567701	10801424	10801924	AT2G25350	NA	2	10797598	10800756	0.755794	0.425026	1788	2	10799978	10800478	+	169	interaction69420	1446	44	0.070445	0	24	0.070445	2400	-57.9053	1852	126	-9.99188	2000	-52	0.333354	0.0803567	0.148857	0.388349
11515350	11515850	AT1G32030	NA	1	11514593	11515595	3.13873	5.52916	11515350	11515850	AT1G32010	NA	1	11509340	11512040	0.602541	0.326913	1223	1	11511498	11511998	+	76	interaction23024	3852	8	0.070445	1	1	0.070445	100	-0.448546	901	29	-9.98071	700	-4	-1.17601	NA	NA	NA
168480	168980	AT2G01370	NA	2	168630	169642	0.69459	0.991599	168480	168980	AT2G01330	NA	2	158276	160901	0.610408	0.33472	2072	2	160396	160896	+	104	interaction59029	8084	20	0.070445	0	7	0.070445	700	-9.59786	1613	78	-9.97096	1300	-16	-0.89399	NA	-0.0181081	0.932302
29845493	29845993	AT1G79350	NA	1	29844632	29853414	0.846942	0.598632	29845493	29845993	AT1G79310	NA	1	29833920	29835545	0.577202	0.790294	51	1	29833907	29834407	+	1299	interaction58150	11586	8	0.070445	1	1	0.070445	100	-0.448887	30	1307	-9.95904	700	-4	0.158568	0.155553	0.0698559	0.923196
12200552	12201052	AT2G28510	NA	2	12199097	12200765	2.58905	2.78412	12200552	12201052	AT2G28500	NA	2	12186568	12188142	0.843938	0.675233	989	2	12183584	12184084	+	36	interaction71868	16968	8	0.070445	1	1	0.070445	100	-0.448887	1071	30	-9.95904	700	-4	-0.0428981	0.8696	-0.493009	0.280441
11451614	11452114	AT2G26860	NA	2	11451972	11453843	0.990369	0.530675	11451614	11452114	AT2G26850	NA	2	11449268	11451239	2.5097	2.71678	405	2	11450039	11450539	+	664	interaction70358	1575	19	0.070445	0	6	0.070445	600	-7.45529	385	526	-9.95612	1300	-16	0.143825	0.52505	NA	NA
20048907	20049407	AT1G53700	NA	1	20048585	20050115	2.92966	3.83775	20048907	20049407	AT1G53690	NA	1	20042639	20043344	4.28511	8.88604	1289	1	20042430	20042930	+	152	interaction33399	6477	15	0.070445	0	4	0.070445	400	-3.99492	1247	106	-9.95099	1100	-10	-0.531091	0.231173	-0.316764	0.711999
10022019	10022519	AT2G23530	Yes	2	10020651	10022864	0.90936	1.8924	10022019	10022519	AT2G23510	NA	2	10011516	10013533	2.00321	2.82349	2009	2	10012002	10012502	+	122	interaction68096	10017	23	0.070445	0	9	0.070445	900	-14.089	1809	76	-9.946	1400	-20	-0.750483	0.0224505	NA	NA
12050522	12051022	AT2G28260	NA	2	12049988	12052453	0.703095	0.875389	12050522	12051022	AT2G28240	NA	2	12039211	12042143	0.605265	0.323049	1658	2	12039953	12040453	+	149	interaction71697	10569	13	0.070445	1.8e-05	3	0.070445	300	-2.53359	1438	100	-9.94153	1000	-8	-0.635342	0.000477786	0.104824	0.63046
2631483	2631983	AT1G08340	Yes	1	2631067	2632871	0.732828	1.45335	2631483	2631983	AT1G08315	NA	1	2620334	2621545	0.503982	0.290446	1958	1	2620527	2621027	+	118	interaction5097	10956	15	0.070445	0	4	0.070445	400	-3.99406	1470	109	-9.93714	1100	-10	-0.142616	0.600273	0.694791	0.00235993
1212586	1213086	AT1G04470	Yes	1	1211048	1214662	0.795441	2.80498	1212586	1213086	AT1G04450	Yes	1	1208520	1209874	3.46929	5.69951	305	1	1209080	1209580	+	916	interaction2694	3506	27	0.070445	0	11	0.070445	1100	-18.6215	225	736	-9.93083	1600	-26	0.0579341	NA	2.04984	NA
14452051	14452551	AT2G34220	Yes	2	14450535	14453856	0.720332	1.10615	14452051	14452551	AT2G34210	Yes	2	14445937	14450522	1.16228	1.74944	143	2	14446528	14447028	+	1920	interaction77943	5523	23	0.070445	0	9	0.070445	900	-14.0837	77	1616	-9.92571	1400	-20	-0.00541327	0.994959	-0.431997	0.708634
4815515	4816015	AT1G14048	NA	1	4815682	4815988	0.864965	0.671768	4815515	4816015	AT1G14030	NA	1	4805305	4807517	0.86191	0.365115	132	1	4806450	4806950	+	1505	interaction9708	9065	13	0.070445	1.8e-05	3	0.070445	300	-2.53303	105	1333	-9.92166	1000	-8	NA	NA	-0.428001	0.00226882
11531909	11532409	AT2G27030	NA	2	11532003	11534333	0.621053	0.468702	11531909	11532409	AT2G27010	Yes	2	11526167	11527854	0.96903	1.51979	79	2	11527049	11527549	+	1389	interaction70654	4860	13	0.070445	1.3e-05	3	0.070445	300	-2.53303	105	1223	-9.92166	1000	-8	0.0160444	0.930479	0.20895	0.597223
124999	125499	AT2G01220	NA	2	123275	126466	0.638411	0.448121	124999	125499	AT2G01190	NA	2	114974	117640	0.514653	0.328476	54	2	115464	115964	+	1527	interaction58988	9535	8	0.070445	1	1	0.070445	100	-0.449504	32	1516	-9.92017	700	-4	0.0161536	0.936649	1.17266	9.39e-09
28203015	28203515	AT1G75140	NA	1	28202052	28204279	0.737465	0.396138	28203015	28203515	AT1G75120	NA	1	28196856	28198802	0.546702	0.322277	179	1	28198422	28198922	+	945	interaction54841	4593	15	0.070445	0	4	0.070445	400	-3.99297	113	822	-9.91988	1100	-10	-0.222252	0.155799	0.129203	0.569847
7568049	7568549	AT2G17430	NA	2	7568017	7570840	0.619013	0.439301	7568049	7568549	AT2G17410	NA	2	7558976	7563752	0.757366	0.408301	1686	2	7559964	7560464	+	153	interaction63861	8085	15	0.070445	0	4	0.070445	400	-3.99297	1324	113	-9.91988	1100	-10	0.150967	0.664355	0.0075279	0.966695
22505422	22505922	AT1G61095	Yes	1	22504513	22505511	1.50612	4.61651	22505422	22505922	AT1G61080	Yes	1	22493193	22497019	1.15354	1.83034	161	1	22496079	22496579	+	1991	interaction39596	9343	13	0.070445	1.9e-05	3	0.070445	300	-2.53215	114	1770	-9.89053	1000	-8	NA	NA	0.0950956	0.886896
9048502	9049002	AT1G26170	NA	1	9047432	9054589	0.759608	0.44047	9048502	9049002	AT1G26160	NA	1	9044440	9046979	0.636492	0.439479	45	1	9045873	9046373	+	1177	interaction17889	2629	8	0.070445	1	1	0.070445	100	-0.450048	34	1003	-9.88631	700	-4	0.00685209	0.969065	-0.206069	0.099275
6988021	6988521	AT1G20150	Yes	1	6987331	6990361	0.667106	1.85089	6988021	6988521	AT1G20132	Yes	1	6981263	6983627	1.59505	2.40178	162	1	6981066	6981566	+	961	interaction13347	6955	13	0.070445	1.9e-05	3	0.070445	300	-2.53197	116	911	-9.8843	1000	-8	-1.8409	NA	NA	NA
4828461	4828961	AT1G14100	Yes	1	4827960	4829587	1.84835	2.38541	4828461	4828961	AT1G14080	NA	1	4822527	4824414	0.76331	0.511559	2101	1	4822445	4822945	+	104	interaction9746	6016	18	0.070445	0	6	0.070445	600	-7.6211	1729	56	-9.88243	1200	-14	-1.05328	0.458503	0.528662	0.0416994
9435552	9436052	AT2G22190	NA	2	9433764	9436544	1.064	1.23889	9435552	9436052	AT2G22180	NA	2	9428742	9429844	6.17465	9.69092	882	2	9428991	9429491	+	130	interaction67422	6561	13	0.070445	1.7e-05	3	0.070445	300	-2.53068	769	133	-9.83928	1000	-8	-1.13072	0.000378952	1.5594	NA
24211949	24212449	AT1G65180	NA	1	24211740	24213870	1.83958	2.63021	24211949	24212449	AT1G65150	Yes	1	24203840	24205775	1.5402	4.09956	186	1	24205393	24205893	+	1101	interaction43873	6556	13	0.070445	2e-05	3	0.070445	300	-2.53061	134	1080	-9.837	1000	-8	0.0592422	0.891272	-1.07517	1.63e-07
14936845	14937345	AT2G35585	Yes	2	14936665	14937964	1.38862	3.61793	14936845	14937345	AT2G35530	NA	2	14922961	14926591	0.787014	0.415795	1385	2	14925433	14925933	+	52	interaction79127	11412	8	0.070445	1	1	0.070445	100	-0.450962	1089	38	-9.83019	700	-4	-1.30283	0.000398439	0.0354098	0.872527
249927	250427	AT1G01690	NA	1	249140	252462	0.669539	0.437973	249927	250427	AT1G01660	Yes	1	240056	242608	0.840335	2.66747	1491	1	240980	241480	+	189	interaction591	8947	15	0.070445	0	4	0.070445	400	-3.98713	1169	141	-9.82799	1100	-10	-0.325475	0.130212	-2.25236	1.15e-09
17790949	17791449	AT2G42730	Yes	2	17787453	17791582	1.33315	1.70376	17790949	17791449	AT2G42720	Yes	2	17785408	17787421	1.60889	1.74052	1401	2	17786420	17786920	+	365	interaction85146	4529	33	0.070445	0	15	0.070445	1500	-29.1497	1297	296	-9.82751	1800	-34	0.291583	0.21605	-0.286492	0.623363
4393082	4393582	AT1G12900	NA	1	4392449	4394400	0.786267	0.493788	4393082	4393582	AT1G12855	NA	1	4382159	4383611	1.09997	0.902418	160	1	4382457	4382957	+	1221	interaction8773	10625	15	0.070445	0	4	0.070445	400	-3.98681	143	1104	-9.82288	1100	-10	-0.80643	7.25e-15	-0.875907	0.640024
21420138	21420638	AT1G57830	NA	1	21420308	21420803	7.37568	10.6817	21420138	21420638	AT1G57820	NA	1	21414169	21417946	0.882275	0.617339	175	1	21417901	21418401	+	705	interaction36859	2237	13	0.070445	2e-05	3	0.070445	300	-2.53018	141	668	-9.82201	1000	-8	NA	NA	-0.125136	0.49399
21385468	21385968	AT1G57750	Yes	1	21383980	21385709	2.31434	4.5	21385468	21385968	AT1G57720	Yes	1	21377614	21380382	0.658637	0.411726	1056	1	21378410	21378910	+	153	interaction36680	7058	13	0.070445	1.9e-05	3	0.070445	300	-2.53012	879	142	-9.81999	1000	-8	-0.214224	NA	0.184156	0.0569297
13026929	13027429	AT1G35420	NA	1	13026237	13027684	0.467268	0.40023	13026929	13027429	AT1G35400	NA	1	13018288	13019198	0.656319	0.381415	1724	1	13018877	13019377	+	35	interaction25761	8052	10	0.070445	0.011545	2	0.070445	200	-1.33123	1706	19	-9.81809	800	-6	-0.273753	0.0223059	NA	NA
15973527	15974027	AT1G42540	NA	1	15973053	15976703	0.571456	0.317286	15973527	15974027	AT1G42525	NA	1	15966380	15968239	0.76165	0.450993	1026	1	15967576	15968076	+	51	interaction26024	5951	12	0.070445	0.00011	3	0.070445	300	-2.57521	960	23	-9.8076	900	-8	-0.515882	9.76e-06	NA	NA
7037582	7038082	AT2G16230	NA	2	7035462	7038326	2.65587	3.52026	7037582	7038082	AT2G16145	NA	2	7008519	7008599	1.47841	0.879445	1193	2	7007053	7007553	+	91	interaction62882	30529	8	0.070445	1	1	0.070445	100	-0.451351	1001	40	-9.80667	700	-4	0.257382	0.598814	NA	NA
8662121	8662621	AT2G20070	NA	2	8662037	8662614	1.46083	1.64531	8662121	8662621	AT2G20020	NA	2	8644385	8647191	0.583175	0.417363	1482	2	8646407	8646907	+	61	interaction66210	15714	8	0.070445	1	1	0.070445	100	-0.451351	1503	40	-9.80667	700	-4	NA	NA	0.0912047	0.653018
14413520	14414020	AT2G34140	NA	2	14413757	14414765	2.22652	2.23289	14413520	14414020	AT2G34100	NA	2	14399533	14413489	1.23472	1.39486	804	2	14408402	14408902	+	54	interaction77783	5118	8	0.070445	1	1	0.070445	100	-0.451351	787	40	-9.80667	700	-4	0.622638	0.0344605	-0.272739	0.892189
17474461	17474961	AT2G41880	NA	2	17474618	17477223	0.651038	0.459568	17474461	17474961	AT2G41860	Yes	2	17467343	17469786	1.6485	3.76402	139	2	17469138	17469638	+	1938	interaction84417	5323	13	0.070445	1.8e-05	3	0.070445	300	-2.52958	152	1875	-9.80135	1000	-8	0.0882089	0.709183	-0.0824998	NA
22070073	22070573	AT1G59950	NA	1	22068032	22070588	1.90868	2.36688	22070073	22070573	AT1G59930	NA	1	22061082	22061481	1.62592	0.965816	898	1	22060884	22061384	+	82	interaction38388	9189	8	0.070445	1	1	0.070445	100	-0.45153	918	41	-9.79584	700	-4	3.29292	0.000236295	-0.909203	0.148659
18226406	18226906	AT1G49260	Yes	1	18225869	18226967	3.89973	4.94147	18226406	18226906	AT1G49240	NA	1	18215871	18218313	0.664193	0.378097	2078	1	18217026	18217526	+	246	interaction28998	9380	15	0.070445	0	4	0.070445	400	-3.98502	1467	155	-9.79509	1100	-10	NA	NA	0.236848	0.0909397
1140969	1141469	AT1G04260	Yes	1	1140527	1141365	0.741546	1.48232	1140969	1141469	AT1G04250	NA	1	1136257	1138613	3.17219	4.66287	106	1	1136051	1136551	+	1456	interaction2589	4918	20	0.070445	0	7	0.070445	700	-9.56582	92	1565	-9.79476	1300	-16	-0.130449	0.474174	-0.16884	0.201821
23948973	23949473	AT1G64480	NA	1	23948027	23949751	2.52149	2.76919	23948973	23949473	AT1G64430	NA	1	23933379	23936867	0.660859	0.42637	46	1	23933922	23934422	+	1947	interaction43122	15051	8	0.070445	1	1	0.070445	100	-0.451702	42	1766	-9.78556	700	-4	-0.845232	0.236669	-0.205558	0.0350175
16250554	16251054	AT2G38920	Yes	2	16248145	16251002	3.81129	6.5521	16250554	16251054	AT2G38890	Yes	2	16241188	16242917	1.03722	2.09571	1074	2	16241481	16241981	+	240	interaction81611	9073	13	0.070445	2.2e-05	3	0.070445	300	-2.52865	997	173	-9.76946	1000	-8	-0.0318761	0.98901	0.308212	NA
6178026	6178526	AT1G17950	NA	1	6177616	6179289	4.06146	7.41943	6178026	6178526	AT1G17920	NA	1	6161871	6165382	0.752544	0.533457	1991	1	6163987	6164487	+	68	interaction12031	14039	8	0.070445	1	1	0.070445	100	-0.452021	1537	44	-9.76651	700	-4	-0.36791	0.393325	0.021895	0.939919
17767391	17767891	AT2G42660	Yes	2	17767049	17768290	1.9567	3.54097	17767391	17767891	AT2G42620	NA	2	17756139	17758468	0.659445	0.472416	1693	2	17756033	17756533	+	59	interaction85004	11358	8	0.070445	1	1	0.070445	100	-0.452021	1541	44	-9.76651	700	-4	1.08415	0.0302478	0.152206	0.392696
17790915	17791415	AT2G42730	Yes	2	17787453	17791582	1.33315	1.70376	17790915	17791415	AT2G42710	Yes	2	17782307	17785063	0.654033	0.454159	1401	2	17782472	17782972	+	206	interaction85139	8443	25	0.070445	0	10	0.070445	1000	-16.2695	1297	144	-9.75934	1500	-22	0.291583	0.21605	0.155626	0.333401
20970483	20970983	AT1G56070	NA	1	20967929	20971742	0.829754	0.423256	20970483	20970983	AT1G56040	Yes	1	20960355	20962334	2.35146	5.73045	57	1	20961562	20962062	+	665	interaction35911	8921	8	0.070445	1	1	0.070445	100	-0.452169	45	544	-9.75766	700	-4	0.0318073	0.891272	-1.17601	NA
11525958	11526458	AT2G27010	Yes	2	11526167	11527854	0.96903	1.51979	11525958	11526458	AT2G27000	Yes	2	11523303	11525095	1.0875	1.41944	276	2	11524393	11524893	+	2079	interaction70586	1565	77	0.070445	0	50	0.070445	5000	-154.681	243	1791	-9.75745	2700	-106	0.20895	0.597223	0.197745	0.424121
12591985	12592485	AT2G29320	NA	2	12592147	12593686	1.19186	1.15682	12591985	12592485	AT2G29300	NA	2	12588190	12589759	0.945241	0.857921	1288	2	12588462	12588962	+	1812	interaction72926	3523	50	0.113531	0	30	0.124243	1700.97	-75.9118	1430	1680	-9.74976	1401.47	-58	-1.02976	9.47e-06	-1.42039	1.38e-21
6688670	6689170	AT2G15350	Yes	2	6688139	6689462	1.85911	2.43606	6688670	6689170	AT2G15345	NA	2	6684410	6685069	1.80174	2.03319	382	2	6684498	6684998	+	77	interaction62632	4172	8	0.070445	1	1	0.070445	100	-0.452312	278	46	-9.74922	700	-4	-0.214155	0.894888	NA	NA
20161986	20162486	AT1G54020	NA	1	20161669	20163748	3.24432	4.31391	20161986	20162486	AT1G54000	NA	1	20154168	20156419	2.90508	3.70407	202	1	20155124	20155624	+	678	interaction33876	6862	15	0.070445	0	4	0.070445	400	-3.98166	184	623	-9.74352	1100	-10	1.45312	0.156894	1.06368	6.24e-10
11000882	11001382	AT2G25790	NA	2	11000598	11004235	3.25083	4.24156	11000882	11001382	AT2G25740	NA	2	10980121	10983945	0.769173	0.376381	1697	2	10983559	10984059	+	76	interaction69761	17323	8	0.070445	1	1	0.070445	100	-0.452448	1403	47	-9.74117	700	-4	0.384545	0.0332508	0.403558	0.0191465
16492827	16493327	AT2G39510	NA	2	16491142	16493151	4.31181	4.74083	16492827	16493327	AT2G39500	NA	2	16489072	16489588	0.597747	0.331979	1217	2	16488943	16489443	+	158	interaction81982	3884	15	0.070445	0	4	0.070445	400	-3.98057	811	196	-9.72681	1100	-10	0.312181	0.509283	-0.261385	0.189289
5237950	5238450	AT1G15215	NA	1	5238064	5240051	0.692467	0.416743	5237950	5238450	AT1G15200	NA	1	5228299	5231184	0.723636	0.435599	582	1	5229962	5230462	+	71	interaction10644	7988	8	0.070445	1	1	0.070445	100	-0.452703	630	49	-9.72611	700	-4	0.0110073	0.968606	-0.0233533	0.894781
18488132	18488632	AT1G49940	Yes	1	18488359	18491179	0.677371	0.843858	18488132	18488632	AT1G49870	NA	1	18460211	18463785	0.60685	0.423249	1773	1	18461506	18462006	+	84	interaction29290	26626	8	0.070445	1	1	0.070445	100	-0.452824	1364	50	-9.71906	700	-4	-0.330008	0.257968	-0.512004	0.031239
29186897	29187397	AT1G77660	NA	1	29185898	29187825	0.668819	0.631874	29186897	29187397	AT1G77630	NA	1	29173456	29175530	0.634425	0.425297	1517	1	29173605	29174105	+	66	interaction56405	13292	8	0.070445	1	1	0.070445	100	-0.452824	1650	50	-9.71906	700	-4	0.0992896	0.748369	0.614723	0.00212327
19207021	19207521	AT1G51790	Yes	1	19206710	19211417	0.663964	1.52841	19207021	19207521	AT1G51780	Yes	1	19204511	19206586	1.10366	1.97436	258	1	19204087	19204587	+	562	interaction30962	2934	15	0.070445	0	4	0.070445	400	-3.97991	204	562	-9.71681	1100	-10	0.835532	0.0309184	1.79267	NA
605099	605599	AT2G02290	Yes	2	604452	605361	1.16491	1.86285	605099	605599	AT2G02240	Yes	2	592358	593602	1.19352	0.952636	605	2	592046	592546	+	76	interaction59553	13053	8	0.070445	1	1	0.070445	100	-0.452939	372	51	-9.7123	700	-4	-1.17601	NA	-0.353547	0.556492
7565417	7565917	AT2G17420	NA	2	7564344	7566539	0.686594	0.373179	7565417	7565917	AT2G17380	NA	2	7553001	7555045	0.654279	0.337169	1716	2	7555017	7555517	+	69	interaction63834	10400	8	0.070445	1	1	0.070445	100	-0.452939	1366	51	-9.7123	700	-4	0.197528	0.0660054	0.174652	0.264727
29738040	29738540	AT1G79050	NA	1	29736958	29740179	0.62094	0.4065	29738040	29738540	AT1G79030	NA	1	29730766	29733611	0.686127	0.381387	77	1	29733152	29733652	+	1141	interaction58032	4888	8	0.070445	1	1	0.070445	100	-0.45305	52	1064	-9.70582	700	-4	-0.0464317	0.786117	-0.201058	0.228769
6294372	6294872	AT2G14700	NA	2	6292465	6295726	1.40168	1.634	6294372	6294872	AT2G14690	NA	2	6283800	6286055	0.685967	0.55328	803	2	6284925	6285425	+	80	interaction62274	9447	8	0.070445	1	1	0.070445	100	-0.45305	492	52	-9.70582	700	-4	NA	NA	0.764791	NA
27893462	27893962	AT1G74170	NA	1	27891493	27896355	0.779889	0.463796	27893462	27893962	AT1G74130	Yes	1	27873610	27876033	0.750103	3.73439	85	1	27873352	27873852	+	1175	interaction54043	20110	8	0.070445	1	1	0.070445	100	-0.453156	53	1221	-9.69959	700	-4	-0.074415	0.805065	-1.40397	NA
13101010	13101510	AT2G30750	NA	2	13099335	13101413	2.22063	2.51885	13101010	13101510	AT2G30690	NA	2	13076228	13078595	0.779039	0.654369	1510	2	13077551	13078051	+	89	interaction74477	23459	8	0.070445	1	1	0.070445	100	-0.453156	1187	53	-9.69959	700	-4	4.62437	2.23e-67	2.26736	NA
26425009	26425509	AT1G70170	NA	1	26423873	26425356	3.67919	3.81245	26425009	26425509	AT1G70160	NA	1	26419948	26422529	0.77542	0.378555	276	1	26421296	26421796	+	762	interaction51032	3713	13	0.070445	2.2e-05	3	0.070445	300	-2.52652	253	675	-9.69761	1000	-8	0.495797	0.0389963	-0.329698	0.0300613
27200003	27200503	AT1G72270	Yes	1	27199732	27211161	0.704771	0.549442	27200003	27200503	AT1G72220	Yes	1	27184280	27185830	1.37825	4.21322	80	1	27184691	27185191	+	1474	interaction52884	15312	8	0.070445	1	1	0.070445	100	-0.453259	54	1189	-9.69361	700	-4	-0.202051	0.913011	-1.44425	0.000426863
19896093	19896593	AT1G53330	Yes	1	19896026	19897442	0.819929	0.546841	19896093	19896593	AT1G53310	NA	1	19884026	19888369	0.654993	0.465608	1024	1	19887085	19887585	+	74	interaction32981	9008	8	0.070445	1	1	0.070445	100	-0.453358	890	55	-9.68786	700	-4	0.754466	0.0317959	-0.13538	0.502945
1584087	1584587	AT1G05400	NA	1	1584072	1585421	1.37357	0.982175	1584087	1584587	AT1G05380	NA	1	1576862	1582614	0.78945	0.447989	1293	1	1580415	1580915	+	81	interaction3145	3672	8	0.070445	1	1	0.070445	100	-0.453454	1255	56	-9.68233	700	-4	0.828628	0.0150674	0.374722	0.0136982
12956565	12957065	AT1G35310	NA	1	12956158	12957090	2.30197	2.5744	12956565	12957065	AT1G35240	NA	1	12927456	12930523	0.732914	0.59195	2065	1	12927906	12928406	+	87	interaction25478	28659	8	0.070445	1	1	0.070445	100	-0.453454	1579	56	-9.68233	700	-4	0.228644	0.635684	-0.419151	0.586822
523588	524088	AT1G02520	Yes	1	523650	528745	0.63961	0.907521	523588	524088	AT1G02510	Yes	1	520497	521668	0.735928	3.01366	608	1	520626	521126	+	1300	interaction993	2962	17	0.070445	0	5	0.070445	500	-5.62132	574	1047	-9.68199	1200	-12	1.06908	0.00061471	NA	NA
5379995	5380495	AT1G15640	Yes	1	5378885	5380139	1.37098	5.86198	5379995	5380495	AT1G15610	Yes	1	5370676	5371859	2.10785	2.242	343	1	5371081	5371581	+	661	interaction11117	8914	13	0.070445	2.3e-05	3	0.070445	300	-2.52594	290	521	-9.67806	1000	-8	-0.963696	0.159882	NA	NA
18025612	18026112	AT1G48740	Yes	1	18023386	18026065	0.96912	1.0172	18025612	18026112	AT1G48700	NA	1	18011034	18012871	0.965606	1.18451	1457	1	18011554	18012054	+	81	interaction28328	14058	8	0.070445	1	1	0.070445	100	-0.453546	1363	57	-9.677	700	-4	-0.54029	0.381272	0.649726	0.47649
6981546	6982046	AT1G20132	Yes	1	6981263	6983627	1.59505	2.40178	6981546	6982046	AT1G20110	NA	1	6971484	6974835	0.71804	0.409988	1335	1	6973551	6974051	+	70	interaction13233	7995	8	0.070445	1	1	0.070445	100	-0.453634	1260	58	-9.67187	700	-4	NA	NA	0.239915	0.0968494
23705087	23705587	AT1G63860	NA	1	23701483	23706005	0.650352	0.547158	23705087	23705587	AT1G63855	NA	1	23699368	23700967	0.603754	0.350411	1252	1	23698971	23699471	+	72	interaction42335	6116	8	0.070445	1	1	0.070445	100	-0.453634	1094	58	-9.67187	700	-4	0.967645	0.135675	-0.0285577	0.924314
21187878	21188378	AT1G56550	Yes	1	21185661	21188369	1.57116	4.25881	21187878	21188378	AT1G56520	Yes	1	21174663	21178974	1.21813	3.29238	1713	1	21177548	21178048	+	220	interaction36395	10330	15	0.070445	0	4	0.070445	400	-3.97684	1759	252	-9.67049	1100	-10	-0.298354	0.171866	-2.64047	3.33e-54
18286968	18287468	AT2G44230	Yes	2	18286524	18288400	0.697514	1.33181	18286968	18287468	AT2G44220	Yes	2	18283802	18285837	0.950104	2.22362	113	2	18284613	18285113	+	836	interaction86248	2355	23	0.070445	0	9	0.070445	900	-14.0146	93	541	-9.67032	1400	-20	-1.60667	1.33e-17	-2.13134	NA
14857300	14857800	AT2G35270	NA	2	14857020	14857878	4.72036	7.73945	14857300	14857800	AT2G35240	NA	2	14844939	14846304	0.51762	0.414149	1334	2	14845470	14845970	+	74	interaction79020	11830	8	0.070445	1	1	0.070445	100	-0.45372	955	59	-9.66691	700	-4	0.0475839	0.919085	0.236011	0.0852401
22488666	22489166	AT1G61060	Yes	1	22488547	22489711	1.11592	1.55062	22488666	22489166	AT1G61000	NA	1	22470923	22474105	0.6005	0.421495	1902	1	22473471	22473971	+	75	interaction39328	15195	8	0.070445	1	1	0.070445	100	-0.453803	1482	60	-9.66213	700	-4	3.3585	NA	-0.467669	0.00366655
3824959	3825459	AT1G11362	NA	1	3824509	3825196	0.484994	0.657608	3824959	3825459	AT1G11340	NA	1	3814115	3817420	0.579352	0.483089	832	1	3814478	3814978	+	79	interaction7102	10481	8	0.070445	1	1	0.070445	100	-0.453883	878	61	-9.65752	700	-4	3.2062	5.69e-08	-0.399137	0.0333549
7744311	7744811	AT1G22000	Yes	1	7744188	7747785	1.13807	1.86249	7744311	7744811	AT1G21980	NA	1	7734738	7738661	0.701525	0.420519	1034	1	7734975	7735475	+	71	interaction14876	9336	8	0.070445	1	1	0.070445	100	-0.453883	673	61	-9.65752	700	-4	-0.479327	NA	0.477314	0.000196291
8241070	8241570	AT2G19000	NA	2	8241103	8241784	3.06092	3.91798	8241070	8241570	AT2G18990	NA	2	8238690	8240002	0.66246	0.528907	819	2	8238539	8239039	+	870	interaction65668	2531	17	0.070445	0	5	0.070445	500	-5.6186	762	801	-9.65687	1200	-12	NA	NA	-0.0959537	0.601462
25838435	25838935	AT1G68790	NA	1	25834708	25839319	0.72099	0.43496	25838435	25838935	AT1G68740	Yes	1	25812448	25816657	0.733883	1.63059	1798	1	25814131	25814631	+	118	interaction49599	24304	8	0.070445	1	1	0.070445	100	-0.453961	1711	62	-9.65306	700	-4	0.0644447	0.683633	-0.196479	0.30039
1826640	1827140	AT1G06030	Yes	1	1826879	1828161	0.722478	0.804897	1826640	1827140	AT1G05960	NA	1	1807972	1815474	0.743135	0.41127	1242	1	1810488	1810988	+	114	interaction4006	16152	8	0.070445	1	1	0.070445	100	-0.454036	1041	63	-9.64875	700	-4	0.564243	0.665658	0.32786	0.00653417
22410176	22410676	AT1G60870	NA	1	22409471	22410654	0.445708	0.26994	22410176	22410676	AT1G60860	NA	1	22400926	22407777	0.808417	0.399919	583	1	22403425	22403925	+	86	interaction39138	6751	8	0.070445	1	1	0.070445	100	-0.454036	736	63	-9.64875	700	-4	0.155457	0.389031	-0.238647	0.302491
16865900	16866400	AT1G44542	NA	1	16864969	16866605	1.85025	1.45027	16865900	16866400	AT1G44350	NA	1	16834209	16838286	1.33286	1.2968	958	1	16836048	16836548	+	65	interaction26202	29852	8	0.070445	1	1	0.070445	100	-0.454109	863	64	-9.64458	700	-4	0.891194	0.596408	0.420733	0.741269
19539957	19540457	AT1G52440	NA	1	19538820	19540907	1.89055	2.29655	19539957	19540457	AT1G52420	NA	1	19527841	19531287	0.622029	0.406648	604	1	19529924	19530424	+	93	interaction32186	10033	8	0.070445	1	1	0.070445	100	-0.45418	548	65	-9.64054	700	-4	0.747547	NA	0.105149	0.397489
25770502	25771002	AT1G68640	Yes	1	25769575	25772543	0.893113	1.19441	25770502	25771002	AT1G68600	Yes	1	25759841	25762934	1.20649	2.79673	76	1	25759970	25760470	+	1036	interaction49405	10532	8	0.070445	1	1	0.070445	100	-0.45418	65	1066	-9.64054	700	-4	-0.333862	0.330084	-1.28313	1.11e-09
28981447	28981947	AT1G77138	NA	1	28982765	28983469	0.836497	0.374922	28981447	28981947	AT1G77110	Yes	1	28970801	28974603	2.05504	3.04039	92	1	28971063	28971563	+	911	interaction55969	10384	8	0.070445	1	1	0.070445	100	-0.45418	65	690	-9.64054	700	-4	0.0186761	0.972943	-0.28505	0.339502
13847937	13848437	AT2G32640	NA	2	13846918	13850909	0.605483	0.457003	13847937	13848437	AT2G32610	NA	2	13836233	13839513	2.22582	2.75918	103	2	13836505	13837005	+	2048	interaction76545	11432	8	0.070445	1	1	0.070445	100	-0.45418	65	1662	-9.64054	700	-4	-0.775998	5.94e-06	0.422206	0.37955
1219585	1220085	AT1G04490	NA	1	1217947	1220137	0.574715	0.576461	1219585	1220085	AT1G04470	Yes	1	1211048	1214662	0.795441	2.80498	86	1	1213501	1214001	+	1129	interaction2781	6084	8	0.070445	1	1	0.070445	100	-0.454314	67	917	-9.63285	700	-4	-0.317944	0.643367	0.0579341	NA
24860387	24860887	AT1G66650	Yes	1	24860112	24861821	1.15098	1.94207	24860387	24860887	AT1G66640	NA	1	24857437	24859011	2.36342	3.37927	426	1	24857915	24858415	+	642	interaction47116	2472	15	0.070445	0	4	0.070445	400	-3.97387	327	387	-9.62594	1100	-10	-0.657804	0.185911	NA	NA
22683544	22684044	AT1G61480	NA	1	22681315	22684475	0.679225	0.437318	22683544	22684044	AT1G61460	NA	1	22674197	22677713	0.619868	0.41001	1913	1	22674047	22674547	+	102	interaction39852	9497	8	0.070445	1	1	0.070445	100	-0.454441	1413	69	-9.62562	700	-4	0.192736	0.619082	0.359212	0.306345
18889960	18890460	AT1G50960	NA	1	18889548	18891719	4.26094	7.28727	18889960	18890460	AT1G50940	NA	1	18877811	18880010	0.752993	0.444897	1022	1	18878541	18879041	+	93	interaction29656	11419	8	0.070445	1	1	0.070445	100	-0.454502	915	70	-9.62217	700	-4	-1.84942	NA	0.111481	0.494815
10155021	10155521	AT2G23840	NA	2	10153796	10155647	0.898586	1.05048	10155021	10155521	AT2G23830	NA	2	10143645	10144511	1.09348	0.796325	855	2	10143563	10144063	+	597	interaction68348	11458	13	0.070445	2.5e-05	3	0.070445	300	-2.52414	1045	529	-9.61838	1000	-8	-1.01463	1.03e-08	1.69838	0.0468747
11994135	11994635	AT1G33090	NA	1	11993297	11996712	3.2447	4.73511	11994135	11994635	AT1G33080	NA	1	11985706	11990482	1.91811	2.37544	297	1	11987092	11987592	+	78	interaction23634	7043	8	0.070445	1	1	0.070445	100	-0.454618	252	72	-9.61557	700	-4	0.648755	0.221399	0.0511305	0.813173
12449859	12450359	AT1G34180	Yes	1	12448566	12451287	0.797443	1.14907	12449859	12450359	AT1G34160	NA	1	12441392	12443256	0.765935	0.467523	553	1	12441614	12442114	+	88	interaction24752	8245	8	0.070445	1	1	0.070445	100	-0.454674	463	73	-9.61241	700	-4	-0.176816	0.676253	0.420597	0.0458221
18504820	18505320	AT1G49975	NA	1	18504801	18505597	0.51328	0.515191	18504820	18505320	AT1G49960	Yes	1	18498638	18501886	0.93485	1.30967	921	1	18500443	18500943	+	113	interaction29403	4377	8	0.070445	1	1	0.070445	100	-0.454674	987	73	-9.61241	700	-4	-0.504608	3.67e-06	-0.833224	0.0117085
11011016	11011516	AT1G30925	Yes	1	11009887	11011792	2.09738	4.32477	11011016	11011516	AT1G30910	Yes	1	11000882	11002936	0.680031	0.484624	440	1	11001526	11002026	+	1382	interaction21873	9490	15	0.070445	0	4	0.070445	400	-3.97293	361	1183	-9.61197	1100	-10	NA	NA	-0.0547259	0.702401
7439546	7440046	AT1G21250	Yes	1	7439265	7442113	0.717878	5.04995	7439546	7440046	AT1G21240	Yes	1	7434302	7436830	0.810995	1.76841	98	1	7434966	7435466	+	828	interaction14286	4580	8	0.070445	1	1	0.070445	100	-0.454781	75	573	-9.60634	700	-4	-1.15486	0.156137	1.0879	0.306925
16825578	16826078	AT2G40280	NA	2	16825499	16828398	0.605156	0.418582	16825578	16826078	AT2G40250	Yes	2	16813329	16815251	1.05579	1.5404	96	2	16814521	16815021	+	1355	interaction82493	11057	8	0.070445	1	1	0.070445	100	-0.454781	75	1528	-9.60634	700	-4	0.189112	0.397423	-0.506199	NA
3284979	3285479	AT1G10060	Yes	1	3284238	3287107	0.688652	1.32535	3284979	3285479	AT1G10040	NA	1	3275890	3278697	0.505986	0.413005	936	1	3277513	3278013	+	83	interaction6204	7466	8	0.070445	1	1	0.070445	100	-0.454883	814	77	-9.60061	700	-4	-0.584889	0.00041653	0.526633	0.0217603
12878986	12879486	AT1G35181	NA	1	12879305	12879470	1.37927	0.841118	12878986	12879486	AT1G35170	NA	1	12870737	12872194	1.46602	1.45719	1370	1	12870531	12871031	+	93	interaction25181	8455	8	0.070445	1	1	0.070445	100	-0.454883	1151	77	-9.60061	700	-4	NA	NA	-0.214225	NA
29717976	29718476	AT1G79000	NA	1	29716349	29724621	0.75017	0.427959	29717976	29718476	AT1G78980	Yes	1	29707686	29711421	0.902468	2.44795	90	1	29711033	29711533	+	1619	interaction57964	6943	8	0.070445	1	1	0.070445	100	-0.454883	77	1496	-9.60061	700	-4	4.18e-05	0.999839	0.747547	NA
750343	750843	AT2G02690	Yes	2	749918	751900	1.44386	3.2195	750343	750843	AT2G02680	Yes	2	745774	748573	2.05013	4.3754	84	2	746300	746800	+	336	interaction59753	4043	8	0.070445	1	1	0.070445	100	-0.454979	79	209	-9.59518	700	-4	0.317297	0.765754	0.0680396	0.887229
2631430	2631930	AT1G08340	Yes	1	2631067	2632871	0.732828	1.45335	2631430	2631930	AT1G08310	NA	1	2618646	2620452	0.728498	0.444502	1958	1	2619616	2620116	+	93	interaction5095	11814	8	0.070445	1	1	0.070445	100	-0.455025	1470	80	-9.59257	700	-4	-0.142616	0.600273	0.480645	0.0449954
6991440	6991940	AT1G20160	NA	1	6990783	6993972	0.657234	0.602381	6991440	6991940	AT1G20120	Yes	1	6975387	6977264	1.21224	1.34913	119	1	6975935	6976435	+	1485	interaction13376	15505	8	0.070445	1	1	0.070445	100	-0.455025	80	1329	-9.59257	700	-4	-0.290651	0.129765	-0.407738	0.367018
19931316	19931816	AT1G53420	NA	1	19926625	19931494	1.09053	0.709396	19931316	19931816	AT1G53400	NA	1	19924751	19926631	0.780331	0.394735	567	1	19924547	19925047	+	68	interaction33152	6769	8	0.070445	1	1	0.070445	100	-0.455025	619	80	-9.59257	700	-4	0.535615	0.812616	0.143482	0.317339
25617043	25617543	AT1G68350	NA	1	25616489	25617265	2.22621	1.75131	25617043	25617543	AT1G68340	NA	1	25614196	25615403	0.513413	0.379911	836	1	25614500	25615000	+	922	interaction48948	2543	13	0.070445	2.6e-05	3	0.070445	300	-2.52333	845	909	-9.59165	1000	-8	0.013382	0.990292	0.499851	0.0638099
4830977	4831477	AT1G14110	Yes	1	4830296	4831915	4.0565	6.83673	4830977	4831477	AT1G14100	Yes	1	4827960	4829587	1.84835	2.38541	467	1	4828464	4828964	+	2101	interaction9793	2513	74	0.070445	0	47	0.070445	4700	-141.409	302	1729	-9.59037	2700	-100	NA	NA	-1.05328	0.458503
10060008	10060508	AT2G23660	NA	2	10060129	10061822	0.509701	0.888108	10060008	10060508	AT2G23620	NA	2	10047378	10049291	1.08896	0.812245	104	2	10048543	10049043	+	983	interaction68286	11465	8	0.070445	1	1	0.070445	100	-0.455071	81	948	-9.59003	700	-4	1.73974	NA	0.350762	0.431962
10395964	10396464	AT2G24470	Yes	2	10395827	10396622	1.54486	2.23976	10395964	10396464	AT2G24420	NA	2	10380025	10383405	0.75171	0.475793	1322	2	10381477	10381977	+	113	interaction68716	14487	8	0.070445	1	1	0.070445	100	-0.455071	1198	81	-9.59003	700	-4	NA	NA	-0.599318	5.57e-05
7893516	7894016	AT2G18150	NA	2	7892132	7893653	3.65866	7.53695	7893516	7894016	AT2G18090	NA	2	7864313	7867766	0.713943	0.449805	1981	2	7864531	7865031	+	127	interaction64404	28985	8	0.070445	1	1	0.070445	100	-0.455115	1816	82	-9.58755	700	-4	-1.80586	9.79e-19	0.497906	4.65e-05
17967500	17968000	AT2G43230	Yes	2	17966250	17968726	0.726013	0.496356	17967500	17968000	AT2G43220	Yes	2	17964218	17966211	1.75065	2.22047	116	2	17964163	17964663	+	399	interaction85541	3337	8	0.070445	1	1	0.070445	100	-0.455115	82	374	-9.58755	700	-4	-0.0610533	0.923284	0.318794	NA
14035454	14035954	AT2G33090	Yes	2	14035214	14035961	0.885149	4.63876	14035454	14035954	AT2G33070	Yes	2	14028281	14031164	3.01451	3.82998	124	2	14029622	14030122	+	652	interaction77165	5832	26	0.070445	0	11	0.070445	1100	-18.8663	105	509	-9.58652	1500	-24	NA	NA	-0.510551	0.629212
13853016	13853516	AT2G32645	Yes	2	13851666	13853343	0.671186	1.00355	13853016	13853516	AT2G32610	NA	2	13836233	13839513	2.22582	2.75918	147	2	13836976	13837476	+	1903	interaction76552	16040	8	0.070445	1	1	0.070445	100	-0.455158	83	1547	-9.58513	700	-4	1.07956	0.615993	0.422206	0.37955
24902394	24902894	AT1G66760	Yes	1	24901977	24904443	1.06129	1.40988	24902394	24902894	AT1G66750	NA	1	24894714	24897253	0.665148	0.306323	998	1	24894413	24894913	+	73	interaction47187	7981	8	0.070445	1	1	0.070445	100	-0.455241	826	85	-9.58047	700	-4	0.0376061	0.963261	0.055268	0.791694
5369186	5369686	AT1G15600	Yes	1	5368922	5370344	1.90535	2.84668	5369186	5369686	AT1G15570	Yes	1	5362008	5365549	0.644531	0.441841	650	1	5363446	5363946	+	113	interaction10982	5740	8	0.070445	1	1	0.070445	100	-0.45532	542	87	-9.57604	700	-4	NA	NA	0.0724826	0.718744
7033883	7034383	AT2G16225	NA	2	7033939	7034317	2.48024	2.23888	7033883	7034383	AT2G16210	Yes	2	7026762	7029054	1.03781	3.13902	574	2	7026938	7027438	+	118	interaction62861	6945	8	0.070445	1	1	0.070445	100	-0.45532	498	87	-9.57604	700	-4	NA	NA	-1.128	NA
16464673	16465173	AT2G39435	NA	2	16464413	16466941	0.719031	0.640698	16464673	16465173	AT2G39410	Yes	2	16455568	16458217	2.91276	6.38934	93	2	16456145	16456645	+	1425	interaction81929	8528	8	0.070445	1	1	0.070445	100	-0.45532	87	1216	-9.57604	700	-4	-0.405044	0.13227	-0.0265475	0.951226
23663663	23664163	AT1G63770	NA	1	23657505	23664677	0.726362	0.454177	23663663	23664163	AT1G63750	Yes	1	23650847	23655363	0.958683	0.812442	641	1	23651021	23651521	+	112	interaction42304	12642	8	0.070445	1	1	0.070445	100	-0.455358	502	88	-9.5739	700	-4	0.0240086	0.913572	0.923563	0.00103496
23834167	23834667	AT1G64230	Yes	1	23833550	23835536	0.74974	0.511084	23834167	23834667	AT1G64210	Yes	1	23831032	23832863	0.605532	3.34263	546	1	23832574	23833074	+	84	interaction42662	1593	8	0.070445	1	1	0.070445	100	-0.455358	546	88	-9.5739	700	-4	0.337387	0.0435104	-0.714507	0.0839935
4872536	4873036	AT1G14260	NA	1	4872855	4874907	0.721921	0.470603	4872536	4873036	AT1G14250	Yes	1	4868451	4871488	1.51806	1.92668	86	1	4868195	4868695	+	762	interaction10142	4341	8	0.070445	1	1	0.070445	100	-0.455396	89	697	-9.57181	700	-4	-0.680453	0.0276368	-0.396348	0.210887
22268516	22269016	AT1G60440	NA	1	22266496	22269243	0.774241	0.466281	22268516	22269016	AT1G60410	NA	1	22258981	22260715	3.39911	5.34281	99	1	22259456	22259956	+	1088	interaction38950	9060	8	0.070445	1	1	0.070445	100	-0.455396	89	828	-9.57181	700	-4	0.217376	0.0891508	NA	NA
10200568	10201068	AT1G29180	Yes	1	10199627	10200962	0.975617	1.76858	10200568	10201068	AT1G29170	NA	1	10190213	10194900	0.683657	0.468059	1967	1	10190485	10190985	+	126	interaction20289	10083	8	0.070445	1	1	0.070445	100	-0.455432	1456	90	-9.56977	700	-4	-0.256631	0.734814	-0.466731	0.0592301
17689100	17689600	AT2G42480	Yes	2	17685804	17689928	1.55642	3.3216	17689100	17689600	AT2G42470	Yes	2	17679886	17685187	1.27894	3.51555	501	2	17679478	17679978	+	92	interaction84938	9622	8	0.070445	1	1	0.070445	100	-0.455432	400	90	-9.56977	700	-4	-1.03745	0.478183	NA	NA
22897918	22898418	AT1G61940	Yes	1	22897398	22898575	0.766415	0.89817	22897918	22898418	AT1G61910	NA	1	22887089	22887169	0.616389	0.444385	664	1	22887032	22887532	+	94	interaction40582	10886	8	0.070445	1	1	0.070445	100	-0.455468	560	91	-9.56777	700	-4	0.747547	NA	NA	NA
22900063	22900563	AT1G61950	Yes	1	22899416	22901946	0.812927	0.946532	22900063	22900563	AT1G61940	Yes	1	22897398	22898575	0.766415	0.89817	946	1	22898037	22898537	+	664	interaction40636	2026	47	0.070445	0	25	0.070445	2500	-59.4661	617	560	-9.56547	2200	-54	-0.936736	0.171172	0.747547	NA
1010903	1011403	AT2G03330	Yes	2	1008459	1014122	1.104	1.92667	1010903	1011403	AT2G03320	Yes	2	1007381	1007945	1.98202	3.98101	135	2	1007511	1008011	+	760	interaction60041	3392	8	0.070445	1	1	0.070445	100	-0.455537	93	923	-9.56391	700	-4	0.0922266	0.634065	2.26736	NA
24276495	24276995	AT1G65350	NA	1	24272517	24277275	2.8447	2.39499	24276495	24276995	AT1G65320	NA	1	24259887	24262951	0.811145	0.478246	1630	1	24261507	24262007	+	98	interaction44042	14988	8	0.070445	1	1	0.070445	100	-0.455603	943	95	-9.56022	700	-4	-0.508652	0.6685	-0.374056	0.00317373
24007149	24007649	AT1G64620	NA	1	24006991	24008694	2.98759	4.98872	24007149	24007649	AT1G64610	NA	1	23998724	24001950	0.614556	0.389658	1004	1	23998926	23999426	+	131	interaction43214	8223	8	0.070445	1	1	0.070445	100	-0.455635	794	96	-9.55843	700	-4	-0.125255	0.54947	0.225267	0.18915
27488956	27489456	AT1G73090	NA	1	27488216	27490766	0.753535	0.366002	27488956	27489456	AT1G73060	Yes	1	27478969	27481448	0.649786	0.423531	116	1	27478935	27479435	+	939	interaction53046	10021	8	0.070445	1	1	0.070445	100	-0.455635	96	1103	-9.55843	700	-4	-0.0841913	0.638165	-0.102395	0.386508
18997038	18997538	AT1G51230	NA	1	18997025	18997434	3.38715	3.56935	18997038	18997538	AT1G51220	Yes	1	18989750	18992149	3.34167	6.05422	599	1	18991020	18991520	+	1506	interaction30176	6018	15	0.070445	0	4	0.070445	400	-3.96919	617	1364	-9.55678	1100	-10	NA	NA	1.53702	NA
29414051	29414551	AT1G78170	Yes	1	29414058	29415094	1.30497	2.29106	29414051	29414551	AT1G78160	Yes	1	29407899	29410184	0.913929	2.9151	467	1	29408513	29409013	+	117	interaction56793	5538	8	0.070445	1	1	0.070445	100	-0.455667	463	97	-9.55668	700	-4	-0.205399	0.624433	-0.214225	NA
24205474	24205974	AT1G65150	Yes	1	24203840	24205775	1.5402	4.09956	24205474	24205974	AT1G65120	NA	1	24191347	24196073	0.649149	0.404581	1101	1	24195056	24195556	+	744	interaction43816	10418	15	0.070445	0	4	0.070445	400	-3.96915	1080	621	-9.55628	1100	-10	-1.07517	1.63e-07	0.26664	0.402976
7846458	7846958	AT1G22220	NA	1	7846601	7847802	1.98097	2.12816	7846458	7846958	AT1G22150	Yes	1	7818360	7821344	1.11255	5.15001	1720	1	7819021	7819521	+	142	interaction15239	27437	8	0.070445	1	1	0.070445	100	-0.455728	1871	99	-9.5533	700	-4	-0.646533	0.186917	-3.17993	0.0132584
12191423	12191923	AT1G33612	NA	1	12191311	12192849	0.663051	0.629766	12191423	12191923	AT1G33590	Yes	1	12177776	12179413	0.790527	0.985465	124	1	12177558	12178058	+	414	interaction23832	13865	8	0.070445	1	1	0.070445	100	-0.455728	99	415	-9.5533	700	-4	1.21811	0.0569764	0.49162	0.00625441
25127368	25127868	AT1G67170	NA	1	25127245	25129457	0.672892	0.633817	25127368	25127868	AT1G67148	NA	1	25121234	25121898	1.36833	1.46394	77	1	25120867	25121367	+	754	interaction48063	6501	8	0.070445	1	1	0.070445	100	-0.455728	99	591	-9.5533	700	-4	0.189719	0.294758	0.437622	0.502575
10404087	10404587	AT2G24510	NA	2	10404372	10405650	3.68998	6.59457	10404087	10404587	AT2G24470	Yes	2	10395827	10396622	1.54486	2.23976	172	2	10396346	10396846	+	1238	interaction68904	7741	8	0.070445	1	1	0.070445	100	-0.455728	99	956	-9.5533	700	-4	NA	NA	NA	NA
9636524	9637024	AT1G27690	NA	1	9636593	9638577	0.666165	0.368989	9636524	9637024	AT1G27660	NA	1	9621569	9626004	3.2358	4.86299	95	1	9621670	9622170	+	1122	interaction18809	14854	8	0.070445	1	1	0.070445	100	-0.455757	100	932	-9.55165	700	-4	0.0848102	0.693329	-0.189931	0.392696
23186530	23187030	AT1G62630	Yes	1	23185911	23188593	1.37947	1.23322	23186530	23187030	AT1G62600	NA	1	23179476	23181519	0.716932	0.431379	780	1	23180050	23180550	+	97	interaction41257	6480	8	0.070445	1	1	0.070445	100	-0.455786	688	101	-9.55005	700	-4	-1.30592	2.42e-07	-0.15963	0.28254
11208490	11208990	AT2G26330	NA	2	11208182	11213971	0.755239	0.511101	11208490	11208990	AT2G26300	NA	2	11196995	11201102	0.775338	0.486791	131	2	11198561	11199061	+	772	interaction70058	9929	8	0.070445	1	1	0.070445	100	-0.455786	101	632	-9.55005	700	-4	-0.174201	0.362882	0.343009	0.00234141
7929931	7930431	AT1G22460	Yes	1	7927427	7930657	0.731128	1.01704	7929931	7930431	AT1G22380	NA	1	7900386	7902332	1.38788	1.46279	104	1	7901946	7902446	+	1828	interaction15654	27985	8	0.070445	1	1	0.070445	100	-0.455815	102	1977	-9.54847	700	-4	-0.0995023	0.912359	1.38745	0.00782881
25865606	25866106	AT1G68820	NA	1	25865659	25868985	0.54845	0.489121	25865606	25866106	AT1G68810	NA	1	25861122	25863120	5.22031	8.24259	109	1	25861996	25862496	+	469	interaction49681	3610	8	0.070445	1	1	0.070445	100	-0.455815	102	364	-9.54847	700	-4	-0.0685432	0.656276	0.204426	0.21256
22720624	22721124	AT1G61580	NA	1	22720691	22723152	0.834889	0.500538	22720624	22721124	AT1G61563	NA	1	22714920	22715448	3.47576	4.94087	116	1	22714636	22715136	+	1097	interaction40160	5988	8	0.070445	1	1	0.070445	100	-0.45587	104	902	-9.54541	700	-4	0.280474	0.0814586	-1.17601	NA
3086890	3087390	AT1G09540	Yes	1	3086158	3087912	0.842439	4.71856	3086890	3087390	AT1G09483	NA	1	3060991	3061729	2.88965	2.9055	137	1	3061397	3061897	+	1184	interaction5892	25493	8	0.070445	1	1	0.070445	100	-0.455949	107	906	-9.54104	700	-4	-2.07997	2.83e-06	-0.589178	NA
5378941	5379441	AT1G15640	Yes	1	5378885	5380139	1.37098	5.86198	5378941	5379441	AT1G15580	Yes	1	5365664	5366497	1.15552	1.91746	1063	1	5365966	5366466	+	135	interaction11084	12975	8	0.070445	1	1	0.070445	100	-0.455949	1060	107	-9.54104	700	-4	-0.963696	0.159882	1.67022	3.24e-05
26407162	26407662	AT1G70110	Yes	1	26406237	26408323	0.682047	0.756937	26407162	26407662	AT1G70070	NA	1	26390015	26394196	0.711076	0.36658	1505	1	26389921	26390421	+	117	interaction50833	17241	8	0.070445	1	1	0.070445	100	-0.455949	1234	107	-9.54104	700	-4	-2.42891	0.0149705	-0.155263	0.453327
4830520	4831020	AT1G14110	Yes	1	4830296	4831915	4.0565	6.83673	4830520	4831020	AT1G14070	NA	1	4818547	4820150	0.708863	0.406333	1060	1	4818522	4819022	+	109	interaction9779	11998	8	0.070445	1	1	0.070445	100	-0.455974	785	108	-9.53964	700	-4	NA	NA	NA	NA
4665527	4666027	AT1G13610	NA	1	4663830	4666031	2.36843	2.40725	4665527	4666027	AT1G13590	NA	1	4647948	4648740	1.80149	2.05273	523	1	4647998	4648498	+	113	interaction9312	17529	8	0.070445	1	1	0.070445	100	-0.455999	476	109	-9.53827	700	-4	-0.704346	0.291918	0.584494	0.106968
23621966	23622466	AT1G63690	NA	1	23618377	23622396	0.647468	0.454813	23621966	23622466	AT1G63680	NA	1	23614436	23617767	0.607089	0.406729	89	1	23614534	23615034	+	1570	interaction42257	7432	8	0.070445	1	1	0.070445	100	-0.456023	110	1614	-9.53692	700	-4	-0.230579	0.0989639	0.00868149	0.970987
21698498	21698998	AT1G58400	NA	1	21696164	21699118	1.24071	1.10909	21698498	21698998	AT1G58390	NA	1	21690961	21694447	1.09819	0.849286	1211	1	21693057	21693557	+	782	interaction37251	5441	30	0.070445	0	13	0.070445	1300	-23.5893	1048	604	-9.53599	1700	-28	0.700747	8.73e-05	-0.534732	0.483295
11296166	11296666	AT1G31550	Yes	1	11295524	11297379	0.916592	1.16806	11296166	11296666	AT1G31540	Yes	1	11288451	11293753	1.07432	1.31161	820	1	11290408	11290908	+	96	interaction22505	5758	8	0.070445	1	1	0.070445	100	-0.456117	736	114	-9.53177	700	-4	-0.640328	0.0940135	0.048948	0.870927
25258465	25258965	AT1G67420	NA	1	25255231	25260430	0.775393	0.471712	25258465	25258965	AT1G67410	NA	1	25251192	25253667	0.666462	0.441209	182	1	25250908	25251408	+	983	interaction48226	7557	8	0.070445	1	1	0.070445	100	-0.456161	116	971	-9.52933	700	-4	-0.0435344	0.882401	0.143927	0.441419
14942421	14942921	AT2G35600	Yes	2	14940844	14945357	0.85862	0.823835	14942421	14942921	AT2G35580	Yes	2	14933827	14935482	4.44314	7.57178	156	2	14934849	14935349	+	653	interaction79182	7572	8	0.070445	1	1	0.070445	100	-0.456182	117	570	-9.52815	700	-4	0.00795308	0.983596	NA	NA
20377514	20378014	AT1G54560	Yes	1	20371648	20379745	0.782009	0.636355	20377514	20378014	AT1G54530	NA	1	20366504	20366888	2.0922	1.57677	219	1	20366520	20367020	+	888	interaction34320	10994	8	0.070445	1	1	0.070445	100	-0.456224	119	825	-9.52583	700	-4	0.261952	0.893095	-0.544648	0.441052
14936845	14937345	AT2G35585	Yes	2	14936665	14937964	1.38862	3.61793	14936845	14937345	AT2G35540	Yes	2	14927157	14928930	0.645172	0.906146	1385	2	14928578	14929078	+	98	interaction79131	8267	18	0.070445	0	6	0.070445	600	-7.57058	1089	75	-9.52515	1200	-14	-1.30283	0.000398439	0.353741	0.00963759
29194972	29195472	AT1G77680	NA	1	29191833	29196287	0.778355	0.375328	29194972	29195472	AT1G77650	NA	1	29181109	29182261	3.9596	5.91645	1001	1	29182022	29182522	+	111	interaction56451	12950	8	0.070445	1	1	0.070445	100	-0.456245	919	120	-9.52471	700	-4	0.142964	0.501899	NA	NA
17996001	17996501	AT2G43310	NA	2	17995900	17996688	0.57529	0.416099	17996001	17996501	AT2G43261	Yes	2	17985246	17986775	1.11619	1.18303	121	2	17986527	17987027	+	676	interaction85680	9474	8	0.070445	1	1	0.070445	100	-0.456245	120	611	-9.52471	700	-4	-0.226229	0.565711	-0.214225	NA
8317535	8318035	AT1G23420	NA	1	8317395	8319483	4.09559	6.19381	8317535	8318035	AT1G23390	NA	1	8309111	8310649	0.73125	0.330323	527	1	8309960	8310460	+	150	interaction16295	7575	8	0.070445	1	1	0.070445	100	-0.456265	463	121	-9.5236	700	-4	NA	NA	-0.882286	1.43e-05
13414989	13415489	AT2G31500	NA	2	13413763	13416536	0.755519	0.489526	13414989	13415489	AT2G31460	Yes	2	13404775	13405510	1.95696	3.95744	195	2	13405048	13405548	+	1048	interaction75292	9941	8	0.070445	1	1	0.070445	100	-0.456285	122	860	-9.52251	700	-4	-0.641911	NA	NA	NA
438542	439042	AT1G02250	Yes	1	437950	439559	1.00138	4.74624	438542	439042	AT1G02220	Yes	1	428813	430647	0.764157	4.34558	137	1	429864	430364	+	605	interaction747	8678	8	0.070445	1	1	0.070445	100	-0.456304	123	660	-9.52144	700	-4	-2.19703	0.2458	-1.03121	0.000576248
22496361	22496861	AT1G61080	Yes	1	22493193	22497019	1.15354	1.83034	22496361	22496861	AT1G61040	NA	1	22483206	22485969	0.753473	0.421419	998	1	22483942	22484442	+	167	interaction39436	12419	8	0.070445	1	1	0.070445	100	-0.456304	884	123	-9.52144	700	-4	0.0950956	0.886896	0.243893	0.0779783
20431914	20432414	AT1G54740	NA	1	20430768	20431986	0.722055	0.782832	20431914	20432414	AT1G54720	NA	1	20422830	20423754	1.42441	1.53604	118	1	20423011	20423511	+	1014	interaction34631	8903	8	0.070445	1	1	0.070445	100	-0.456415	129	707	-9.51537	700	-4	0.366103	0.298927	0.927376	NA
14845942	14846442	AT2G35240	NA	2	14844939	14846304	0.51762	0.414149	14845942	14846442	AT2G35210	Yes	2	14836061	14838149	0.78558	3.9033	109	2	14837045	14837545	+	743	interaction78999	8897	8	0.070445	1	1	0.070445	100	-0.456547	137	623	-9.50812	700	-4	0.236011	0.0852401	-1.03198	0.0198776
20425555	20426055	AT1G54730	NA	1	20424409	20430123	0.616295	0.371453	20425555	20426055	AT1G54720	NA	1	20422830	20423754	1.42441	1.53604	120	1	20423351	20423851	+	1008	interaction34558	2204	8	0.070445	1	1	0.070445	100	-0.456562	138	637	-9.50727	700	-4	0.284353	0.0150558	0.927376	NA
13511985	13512485	AT2G31770	NA	2	13511578	13513550	3.50999	4.11855	13511985	13512485	AT2G31760	NA	2	13508492	13510390	2.80044	3.95109	178	2	13508410	13508910	+	223	interaction75536	3575	8	0.070445	1	1	0.070445	100	-0.456578	139	235	-9.50644	700	-4	-1.17601	NA	NA	NA
20697939	20698439	AT1G55430	NA	1	20697648	20699622	2.72819	3.61477	20697939	20698439	AT1G55420	NA	1	20691774	20693952	2.94268	4.2046	204	1	20692545	20693045	+	710	interaction35164	5394	8	0.070445	1	1	0.070445	100	-0.456593	140	520	-9.50562	700	-4	0.471282	0.295073	0.668719	0.0687929
23493899	23494399	AT1G63340	NA	1	23491881	23494019	0.951535	1.5231	23493899	23494399	AT1G63320	Yes	1	23488883	23489530	1.058	1.87827	139	1	23488672	23489172	+	329	interaction41898	5227	8	0.070445	1	1	0.070445	100	-0.456593	140	215	-9.50562	700	-4	-1.99099	0.254703	NA	NA
26720573	26721073	AT1G70870	Yes	1	26721019	26721563	1.27349	3.12257	26720573	26721073	AT1G70820	Yes	1	26705517	26708264	0.84782	1.45819	157	1	26705963	26706463	+	1449	interaction51509	14610	8	0.070445	1	1	0.070445	100	-0.456593	140	1200	-9.50562	700	-4	-1.17601	NA	-0.517462	0.00533317
8203919	8204419	AT1G23145	Yes	1	8203961	8204255	1.25286	3.11762	8203919	8204419	AT1G23100	Yes	1	8195775	8196475	0.925218	1.27255	141	1	8195482	8195982	+	661	interaction16072	8437	8	0.070445	1	1	0.070445	100	-0.456636	143	662	-9.50322	700	-4	NA	NA	-0.444861	0.170871
16900038	16900538	AT2G40460	NA	2	16896906	16901280	0.764579	0.592774	16900038	16900538	AT2G40440	NA	2	16889211	16891292	2.85952	4.57346	151	2	16889433	16889933	+	1711	interaction82794	10605	8	0.070445	1	1	0.070445	100	-0.456651	144	1450	-9.50245	700	-4	-1.04734	0.000142562	-1.17601	NA
13926837	13927337	AT2G32820	Yes	2	13925816	13926979	1.70353	6.42142	13926837	13927337	AT2G32810	Yes	2	13919126	13925351	0.596698	0.562448	564	2	13923530	13924030	+	163	interaction76839	3307	8	0.070445	1	1	0.070445	100	-0.456665	364	145	-9.50168	700	-4	0.571852	NA	-0.0647729	0.72646
10316096	10316596	AT2G24255	Yes	2	10315514	10317353	3.13033	5.9309	10316096	10316596	AT2G24250	Yes	2	10313285	10314920	0.756843	0.518538	1173	2	10313023	10313523	+	142	interaction68564	3073	23	0.070445	0	9	0.070445	900	-13.9665	893	109	-9.50029	1400	-20	0.573738	NA	0.0588942	0.815742
9766837	9767337	AT2G22950	Yes	2	9766126	9769766	1.19928	1.40396	9766837	9767337	AT2G22930	Yes	2	9759672	9761163	1.16564	1.21506	466	2	9759595	9760095	+	162	interaction67838	7242	8	0.070445	1	1	0.070445	100	-0.456692	418	147	-9.50019	700	-4	-1.31567	NA	-0.710863	0.105431
29699555	29700055	AT1G78960	NA	1	29696469	29701263	0.991139	0.712224	29699555	29700055	AT1G78955	Yes	1	29689152	29694255	1.02331	0.898891	181	1	29693411	29693911	+	486	interaction57783	6144	8	0.070445	1	1	0.070445	100	-0.456745	151	479	-9.49731	700	-4	0.0441512	0.869361	-0.134595	0.804581
26714046	26714546	AT1G70840	NA	1	26712981	26714066	4.31609	6.08534	26714046	26714546	AT1G70820	Yes	1	26705517	26708264	0.84782	1.45819	216	1	26706384	26706884	+	831	interaction51419	7662	8	0.070445	1	1	0.070445	100	-0.456757	152	758	-9.49662	700	-4	-0.715034	NA	-0.517462	0.00533317
29714538	29715038	AT1G78990	Yes	1	29713530	29714969	0.971265	1.24475	29714538	29715038	AT1G78960	NA	1	29696469	29701263	0.991139	0.712224	1409	1	29700937	29701437	+	152	interaction57921	13601	8	0.070445	1	1	0.070445	100	-0.456782	1354	154	-9.49526	700	-4	-1.11054	0.000213287	0.0441512	0.869361
13261372	13261872	AT2G31110	Yes	2	13258328	13262099	1.20754	1.15079	13261372	13261872	AT2G31085	NA	2	13254177	13254706	3.52265	4.54071	655	2	13253998	13254498	+	188	interaction74886	7374	8	0.070445	1	1	0.070445	100	-0.456807	627	156	-9.49393	700	-4	0.405982	0.0914384	0.42329	0.34604
20773963	20774463	AT1G55600	NA	1	20774045	20776294	2.24423	2.19806	20773963	20774463	AT1G55570	NA	1	20757766	20760076	4.12921	6.37835	198	1	20758550	20759050	+	1771	interaction35383	15413	8	0.070445	1	1	0.070445	100	-0.456876	162	1250	-9.49016	700	-4	0.311587	NA	1.5594	NA
11528976	11529476	AT2G27020	NA	2	11528347	11530976	0.71354	0.446385	11528976	11529476	AT2G26975	NA	2	11512860	11513553	0.754581	0.435002	177	2	11513048	11513548	+	1714	interaction70636	15928	8	0.070445	1	1	0.070445	100	-0.45693	167	1684	-9.48722	700	-4	-0.017343	0.916391	-0.19394	0.199912
8114984	8115484	AT2G18720	Yes	2	8114919	8116811	1.65383	3.19288	8114984	8115484	AT2G18640	Yes	2	8083739	8084888	0.68088	2.61298	247	2	8084336	8084836	+	955	interaction65462	30648	8	0.070445	1	1	0.070445	100	-0.45694	168	830	-9.48666	700	-4	0.15195	0.909398	0.368031	0.815246
13936411	13936911	AT2G32850	NA	2	13935185	13938845	0.785964	0.418574	13936411	13936911	AT2G32820	Yes	2	13925816	13926979	1.70353	6.42142	230	2	13925736	13926236	+	690	interaction76902	10675	8	0.070445	1	1	0.070445	100	-0.456981	172	533	-9.48446	700	-4	0.31466	0.019638	0.571852	NA
10895494	10895994	AT2G25600	Yes	2	10894485	10898642	0.549957	0.699716	10895494	10895994	AT2G25570	NA	2	10884965	10887921	0.69516	0.437698	956	2	10885512	10886012	+	166	interaction69670	9982	8	0.070445	1	1	0.070445	100	-0.45701	796	175	-9.48288	700	-4	-0.863589	0.533831	0.0706336	0.737248
9425620	9426120	AT1G27130	Yes	1	9425459	9426886	0.599793	2.5573	9425620	9426120	AT1G27120	NA	1	9421176	9424069	0.735488	0.428038	1181	1	9423954	9424454	+	227	interaction18423	1666	8	0.070445	1	1	0.070445	100	-0.457188	1240	196	-9.4732	700	-4	-0.247294	0.106929	-0.875286	5.82e-08
12491458	12491958	AT2G29080	NA	2	12489626	12493285	0.738831	0.349628	12491458	12491958	AT2G29050	NA	2	12478145	12480372	0.702694	0.507306	193	2	12478664	12479164	+	1987	interaction72705	12794	8	0.070445	1	1	0.070445	100	-0.457274	208	1827	-9.46855	700	-4	-0.175018	0.247555	0.00744631	0.974157
9425010	9425510	AT2G22160	NA	2	9425142	9425460	1.75196	2.21998	9425010	9425510	AT2G22140	NA	2	9414838	9418668	0.887139	0.559927	983	2	9416994	9417494	+	170	interaction67383	8016	8	0.070445	1	1	0.070445	100	-0.457288	825	210	-9.46783	700	-4	NA	NA	-0.345738	0.395104
14511400	14511900	AT2G34370	NA	2	14510481	14511891	2.34583	3.28578	14511400	14511900	AT2G34350	NA	2	14493585	14495802	1.93434	1.51325	1729	2	14495072	14495572	+	265	interaction78213	16328	8	0.070445	1	1	0.070445	100	-0.457414	1316	231	-9.46101	700	-4	-0.862446	NA	-0.595265	0.401739
27779513	27780013	AT1G73870	NA	1	27779165	27780676	1.41974	1.07324	27779513	27780013	AT1G73850	Yes	1	27767262	27770457	2.21608	2.87903	289	1	27766914	27767414	+	414	interaction53822	12599	8	0.070445	1	1	0.070445	100	-0.457481	244	412	-9.45739	700	-4	-1.07886	6.92e-12	0.0730794	0.695891
12684093	12684593	AT2G29670	NA	2	12681957	12685087	0.489468	0.80547	12684093	12684593	AT2G29640	NA	2	12671205	12673300	0.68808	0.388442	876	2	12671517	12672017	+	282	interaction73355	12576	8	0.070445	1	1	0.070445	100	-0.457572	1032	264	-9.45252	700	-4	-1.01055	3.53e-07	0.331675	0.0982159
1804582	1805082	AT1G05950	Yes	1	1804400	1807471	0.752428	0.446079	1804582	1805082	AT1G05940	NA	1	1801161	1803984	0.738065	0.399968	466	1	1801411	1801911	+	423	interaction3970	3171	8	0.070445	1	1	0.070445	100	-0.457653	405	285	-9.44815	700	-4	-0.377245	0.218778	0.0943089	0.480138
10022029	10022529	AT2G23530	Yes	2	10020651	10022864	0.90936	1.8924	10022029	10022529	AT2G23520	NA	2	10013990	10016943	0.907559	0.827925	2009	2	10015021	10015521	+	102	interaction68101	7008	21	0.070445	0	8	0.070445	800	-11.8033	1809	71	-9.44776	1300	-18	-0.750483	0.0224505	-0.28964	0.0339668
12704925	12705425	AT2G29730	NA	2	12703536	12705181	0.705593	0.783449	12704925	12705425	AT2G29700	NA	2	12697419	12698167	0.55288	0.40649	596	2	12697964	12698464	+	320	interaction73590	6961	8	0.070445	1	1	0.070445	100	-0.457664	538	288	-9.44757	700	-4	-0.253757	0.200834	-0.105057	0.53352
5379999	5380499	AT1G15640	Yes	1	5378885	5380139	1.37098	5.86198	5379999	5380499	AT1G15600	Yes	1	5368922	5370344	1.90535	2.84668	343	1	5369444	5369944	+	871	interaction11116	10555	8	0.070445	1	1	0.070445	100	-0.457671	290	852	-9.4472	700	-4	-0.963696	0.159882	NA	NA
25872471	25872971	AT1G68830	NA	1	25872444	25875550	0.729876	0.474432	25872471	25872971	AT1G68825	NA	1	25869699	25870420	2.20571	1.88521	90	1	25870028	25870528	+	1399	interaction49699	2443	24	0.070445	0	10	0.070445	1000	-16.5144	76	1432	-9.44699	1400	-22	-0.565365	3.43e-07	0.44458	0.499446
17113990	17114490	AT2G41010	NA	2	17113865	17114804	0.632162	0.488206	17113990	17114490	AT2G40995	NA	2	17109393	17109712	3.40087	3.22704	334	2	17109107	17109607	+	678	interaction83356	4883	8	0.070445	1	1	0.070445	100	-0.457742	312	656	-9.4434	700	-4	0.154696	0.691005	NA	NA
8408101	8408601	AT1G23780	Yes	1	8406685	8408525	0.470368	0.342334	8408101	8408601	AT1G23730	NA	1	8395556	8398144	2.14099	3.1807	308	1	8395469	8395969	+	1340	interaction16571	12632	8	0.070445	1	1	0.070445	100	-0.457782	326	1358	-9.44125	700	-4	-0.00352209	0.984257	-0.615574	0.0215187
7033992	7034492	AT1G20320	Yes	1	7033656	7034874	1.39246	1.25595	7033992	7034492	AT1G20300	NA	1	7029628	7031535	0.594766	0.430547	505	1	7030848	7031348	+	683	interaction13540	3144	22	0.070445	0	8	0.070445	800	-11.5307	540	507	-9.43657	1400	-18	0.94568	NA	0.361303	0.0246818
10207958	10208458	AT1G29200	NA	1	10207821	10210622	0.844168	0.718626	10207958	10208458	AT1G29180	Yes	1	10199627	10200962	0.975617	1.76858	136	1	10200561	10201061	+	1967	interaction20398	7397	23	0.070445	0	9	0.070445	900	-13.9476	117	1456	-9.43493	1400	-20	-0.670808	0.0886176	-0.256631	0.734814
23227422	23227922	AT1G62720	NA	1	23227531	23229150	0.578697	0.425691	23227422	23227922	AT1G62710	NA	1	23223873	23226916	1.83816	2.30762	152	1	23226000	23226500	+	1258	interaction41337	1422	26	0.070445	0	11	0.070445	1100	-18.8046	121	969	-9.42553	1500	-24	0.279779	0.599035	-0.818582	0.0035433
12049518	12050018	AT2G28260	NA	2	12049988	12052453	0.703095	0.875389	12049518	12050018	AT2G28220	NA	2	12033952	12037527	2.44563	3.81489	1059	2	12033898	12034398	+	594	interaction71671	15620	8	0.070445	1	1	0.070445	100	-0.458143	1210	547	-9.42197	700	-4	-0.635342	0.000477786	NA	NA
12630158	12630658	AT2G29480	Yes	2	12630197	12631321	1.42982	3.04848	12630158	12630658	AT2G29430	Yes	2	12619553	12620027	0.92425	1.70574	507	2	12619519	12620019	+	1476	interaction73136	10639	8	0.070445	1	1	0.070445	100	-0.45818	588	1539	-9.41999	700	-4	-0.0377593	0.930902	0.411872	0.828259
26310040	26310540	AT1G69860	NA	1	26309627	26312174	2.11805	1.71937	26310040	26310540	AT1G69850	Yes	1	26296675	26300472	0.984758	0.710933	791	1	26299516	26300016	+	580	interaction50686	10524	8	0.070445	1	1	0.070445	100	-0.458184	593	598	-9.41977	700	-4	2.35798	NA	0.359851	0.0643201
3092011	3092511	AT1G09550	Yes	1	3089732	3092327	3.28468	7.15765	3092011	3092511	AT1G09500	NA	1	3066698	3068598	1.61464	1.59114	601	1	3067005	3067505	+	672	interaction5909	25006	8	0.070445	1	1	0.070445	100	-0.458203	617	649	-9.41875	700	-4	NA	NA	0.673917	0.0932521
13431425	13431925	AT2G31540	NA	2	13430636	13432065	1.0377	1.15497	13431425	13431925	AT2G31480	Yes	2	13408977	13410999	0.871833	1.46912	735	2	13410441	13410941	+	1668	interaction75323	20984	8	0.070445	1	1	0.070445	100	-0.458236	663	1391	-9.41701	700	-4	-1.1077	0.156336	-3.53797	0.0515559
18503091	18503591	AT1G49970	NA	1	18501569	18504609	0.711618	0.361635	18503091	18503591	AT1G49910	NA	1	18479024	18481475	0.715863	0.452328	725	1	18479067	18479567	+	1766	interaction29363	24024	8	0.070445	1	1	0.070445	100	-0.458253	690	1754	-9.4161	700	-4	0.0977077	0.48532	-0.382057	0.176903
10888508	10889008	AT2G25580	NA	2	10888013	10890367	0.610396	0.414331	10888508	10889008	AT2G25540	Yes	2	10866821	10872077	0.866777	0.777697	779	2	10871091	10871591	+	1106	interaction69608	17417	8	0.070445	1	1	0.070445	100	-0.458271	721	1025	-9.41513	700	-4	0.322628	0.0412795	-1.22757	0.47225
28209511	28210011	AT1G75160	NA	1	28209436	28211804	2.03071	1.75263	28209511	28210011	AT1G75120	NA	1	28196856	28198802	0.546702	0.322277	1205	1	28197429	28197929	+	920	interaction54866	12082	8	0.070445	1	1	0.070445	100	-0.458277	1005	732	-9.41481	700	-4	0.296259	0.702922	0.129203	0.569847
26726082	26726582	AT1G70890	NA	1	26725625	26726544	3.36749	4.13765	26726082	26726582	AT1G70820	Yes	1	26705517	26708264	0.84782	1.45819	1582	1	26706482	26706982	+	831	interaction51640	19600	8	0.070445	1	1	0.070445	100	-0.458291	1490	758	-9.41409	700	-4	-0.0495901	0.869636	-0.517462	0.00533317
9439986	9440486	AT1G27180	NA	1	9439858	9446106	0.755866	0.463838	9439986	9440486	AT1G27130	Yes	1	9425459	9426886	0.599793	2.5573	752	1	9426024	9426524	+	1422	interaction18532	13962	8	0.070445	1	1	0.070445	100	-0.458299	774	1405	-9.41367	700	-4	-0.0703732	0.774853	-0.247294	0.106929
20770613	20771113	AT1G55590	NA	1	20769319	20771871	0.937033	0.754511	20770613	20771113	AT1G55560	Yes	1	20754320	20756656	1.98587	3.0068	1096	1	20755928	20756428	+	1845	interaction35327	14685	11	0.098367	0.003232	1	0.070445	100	-0.458312	802	1581	-9.41297	687.758	-6	0.0653343	0.719583	NA	NA
29498505	29499005	AT1G78400	Yes	1	29498280	29499682	1.64687	0.651028	29498505	29499005	AT1G78380	NA	1	29486412	29487906	0.588986	0.76034	1094	1	29487092	29487592	+	1204	interaction57109	11413	8	0.070445	1	1	0.070445	100	-0.458361	927	1239	-9.41037	700	-4	-0.463517	NA	-0.253267	0.00786438
13940348	13940848	AT2G32860	NA	2	13940186	13943804	2.78122	3.54832	13940348	13940848	AT2G32800	NA	2	13916451	13919179	0.54403	0.594955	1317	2	13916590	13917090	+	1097	interaction76929	23758	8	0.070445	1	1	0.070445	100	-0.458391	1023	1262	-9.40881	700	-4	-0.00418939	0.989199	-0.0134159	0.970987
11768539	11769039	AT2G27540	NA	2	11768950	11769100	1.19725	0.871073	11768539	11769039	AT2G27535	NA	2	11765322	11766144	1.5179	1.37546	256	2	11765016	11765516	+	1670	interaction71074	3523	40	0.070445	0	21	0.070445	2100	-47.5836	160	1906	-9.38472	1900	-44	NA	NA	-0.613781	NA
27504517	27505017	AT1G73150	Yes	1	27504111	27506112	0.645656	0.339111	27504517	27505017	AT1G73130	NA	1	27499034	27502055	0.637849	0.424714	220	1	27499462	27499962	+	1441	interaction53143	5055	20	0.070445	0	7	0.070445	700	-9.47799	185	1437	-9.34347	1300	-16	0.0993376	0.729142	-0.0390937	0.896641
19908044	19908544	AT1G53360	Yes	1	19907516	19908548	6.4051	10.3249	19908044	19908544	AT1G53350	Yes	1	19903898	19907515	1.12025	1.68397	1801	1	19906017	19906517	+	165	interaction33085	2027	48	0.070445	0	28	0.070445	2800	-71.9155	1630	125	-9.33895	2000	-58	NA	NA	-1.09174	9.53e-12
13925983	13926483	AT2G32820	Yes	2	13925816	13926979	1.70353	6.42142	13925983	13926483	AT2G32800	NA	2	13916451	13919179	0.54403	0.594955	1838	2	13916499	13916999	+	1097	interaction76820	9484	21	0.098083	0	8	0.101619	554.578	-11.5053	1557	1262	-9.33751	953.675	-18	0.571852	NA	-0.0134159	0.970987
10395638	10396138	AT2G24470	Yes	2	10395827	10396622	1.54486	2.23976	10395638	10396138	AT2G24440	Yes	2	10391088	10392828	0.702587	0.462593	982	2	10391980	10392480	+	291	interaction68707	3658	20	0.070445	0	7	0.070445	700	-9.4732	827	196	-9.32007	1300	-16	NA	NA	-0.0973262	0.764947
14705888	14706388	AT2G34850	NA	2	14704631	14706191	0.581398	0.404641	14705888	14706388	AT2G34840	NA	2	14702487	14704353	0.866064	1.52887	100	2	14702901	14703401	+	702	interaction78734	2987	16	0.070445	0	5	0.070445	500	-5.72079	59	610	-9.31515	1100	-12	-0.736727	0.0629995	0.368592	0.0126346
17772391	17772891	AT2G42670	NA	2	17771775	17774647	0.79832	0.413242	17772391	17772891	AT2G42660	Yes	2	17767049	17768290	1.9567	3.54097	112	2	17767438	17767938	+	1693	interaction85054	4953	27	0.070445	0	12	0.070445	1200	-21.5202	95	1541	-9.30185	1500	-26	-0.0172424	0.932749	1.08415	0.0302478
8594863	8595363	AT1G24260	NA	1	8593636	8596105	5.03613	8.51263	8594863	8595363	AT1G24256	NA	1	8592077	8592989	2.63164	2.64909	635	1	8592426	8592926	+	75	interaction17047	2437	20	0.070445	0	8	0.070445	800	-12.085	502	39	-9.30078	1200	-18	1.78083	5.72e-12	NA	NA
5574996	5575496	AT1G16300	NA	1	5574309	5577622	0.684486	0.449498	5574996	5575496	AT1G16290	Yes	1	5570752	5573538	1.07899	1.14034	1847	1	5572562	5573062	+	110	interaction11349	2434	21	0.070445	0	8	0.070445	800	-11.7664	1501	80	-9.29394	1300	-18	0.0759746	0.75042	-0.195423	NA
16840923	16841423	AT2G40320	Yes	2	16840146	16842282	0.664848	0.911385	16840923	16841423	AT2G40310	NA	2	16834064	16835711	0.683347	0.527624	1803	2	16835015	16835515	+	130	interaction82543	5908	16	0.070445	0	5	0.070445	500	-5.71704	1509	61	-9.28026	1100	-12	-0.410196	0.0380839	NA	NA
24277948	24278448	AT1G65352	NA	1	24277771	24278298	1.56347	1.67072	24277948	24278448	AT1G65350	NA	1	24272517	24277275	2.8447	2.39499	1721	1	24275606	24276106	+	76	interaction44095	2342	14	0.070445	1e-06	4	0.070445	400	-4.04424	1505	42	-9.26866	1000	-10	NA	NA	-0.508652	0.6685
169433	169933	AT2G01370	NA	2	168630	169642	0.69459	0.991599	169433	169933	AT2G01350	NA	2	165140	167259	0.654818	0.382811	1086	2	167018	167518	+	165	interaction59069	2415	23	0.070445	0	9	0.070445	900	-13.8953	955	147	-9.2594	1400	-20	-0.89399	NA	0.0282996	0.861411
7752437	7752937	AT1G22015	NA	1	7751001	7753519	2.20122	3.33419	7752437	7752937	AT1G21990	NA	1	7740529	7742106	4.11884	6.74062	1449	1	7742045	7742545	+	157	interaction14973	10392	18	0.070445	0	6	0.070445	600	-7.52609	1213	108	-9.23257	1200	-14	NA	NA	2.53413	NA
12660934	12661434	AT1G34580	NA	1	12660550	12663870	1.58843	1.69926	12660934	12661434	AT1G34575	Yes	1	12657148	12658732	2.19098	6.34288	1880	1	12657530	12658030	+	774	interaction25052	3404	65	0.070785	0	39	0.070445	3900	-108.499	1543	802	-9.23194	2568.77	-82	-0.388417	0.188991	NA	NA
7517054	7517554	AT2G17290	NA	2	7516414	7519633	0.732746	0.636672	7517054	7517554	AT2G17270	NA	2	7510099	7512387	0.772422	0.471636	1541	2	7510503	7511003	+	58	interaction63745	6551	17	0.070445	0	6	0.070445	600	-7.71885	1486	38	-9.21996	1100	-14	0.437206	0.0834471	-0.156706	0.603066
11717004	11717504	AT2G27385	NA	2	11716000	11717432	1.41816	1.79032	11717004	11717504	AT2G27380	NA	2	11713410	11715696	0.660268	0.545381	2062	2	11713855	11714355	+	68	interaction70874	3149	17	0.070445	0	6	0.070445	600	-7.71885	1982	38	-9.21996	1100	-14	-0.599259	0.00225195	-2.20509	NA
14264510	14265010	AT2G33720	NA	2	14263731	14265202	0.884783	0.621735	14264510	14265010	AT2G33710	NA	2	14258508	14260739	2.19436	1.92522	74	2	14259865	14260365	+	1118	interaction77633	4645	19	0.070445	0	7	0.070445	700	-9.68786	55	1277	-9.21773	1200	-16	2.9026	NA	1.4993	1.01e-14
21417076	21417576	AT1G57820	NA	1	21414169	21417946	0.882275	0.617339	21417076	21417576	AT1G57800	NA	1	21408622	21412283	3.43627	6.14388	1272	1	21410994	21411494	+	75	interaction36806	6082	14	0.070445	1e-06	4	0.070445	400	-4.04044	1045	44	-9.2112	1000	-10	-0.125136	0.49399	5.91606	0.000486253
9224614	9225114	AT1G26690	NA	1	9224144	9225775	0.745962	0.534056	9224614	9225114	AT1G26680	Yes	1	9219462	9223649	0.868771	0.634116	922	1	9222909	9223409	+	135	interaction18124	1705	18	0.070445	0	6	0.070445	600	-7.52167	876	113	-9.20452	1200	-14	0.163371	0.288484	-0.838714	0.0520647
22502538	22503038	AT1G61093	Yes	1	22501884	22502941	1.60724	4.62269	22502538	22503038	AT1G61080	Yes	1	22493193	22497019	1.15354	1.83034	828	1	22496066	22496566	+	1991	interaction39535	6472	28	0.080194	0	10	0.070445	1000	-16.069	620	1770	-9.18385	1459.6	-26	-1.17601	NA	0.0950956	0.886896
6253491	6253991	AT1G18160	NA	1	6248792	6254039	0.662551	0.389887	6253491	6253991	AT1G18150	NA	1	6244297	6247812	0.829617	0.403894	83	1	6246931	6247431	+	1668	interaction12228	6560	16	0.070445	0	5	0.070445	500	-5.70024	72	1824	-9.12751	1100	-12	0.140935	0.303361	-0.566818	3.24e-05
1161474	1161974	AT1G04330	NA	1	1161310	1161982	2.02715	1.7478	1161474	1161974	AT1G04310	NA	1	1154763	1157711	0.779195	0.410472	876	1	1156107	1156607	+	61	interaction2599	5367	10	0.070445	0.019456	2	0.070445	200	-1.33101	884	32	-9.12574	800	-6	-0.612896	0.308434	0.28703	0.180595
13735417	13735917	AT2G32350	NA	2	13734944	13735788	1.37377	1.37138	13735417	13735917	AT2G32320	NA	2	13726818	13731767	0.688383	0.49334	1243	2	13729069	13729569	+	1237	interaction76109	6348	26	0.074796	0	10	0.070445	1000	-16.0464	1000	1114	-9.12339	1448.72	-24	-2.09711	NA	0.0564842	0.776462
25763475	25763975	AT1G68610	Yes	1	25763622	25764105	3.65886	4.62857	25763475	25763975	AT1G68600	Yes	1	25759841	25762934	1.20649	2.79673	143	1	25760639	25761139	+	633	interaction49379	2836	18	0.070445	0	6	0.070445	600	-7.5086	131	565	-9.12265	1200	-14	0.590299	NA	-1.28313	1.11e-09
5985995	5986495	AT1G17440	NA	1	5983983	5987784	0.733192	0.404655	5985995	5986495	AT1G17420	Yes	1	5977410	5981480	1.11287	1.59474	92	1	5977537	5978037	+	2076	interaction11972	8458	14	0.070445	1e-06	4	0.070445	400	-4.03381	48	1950	-9.1131	1000	-10	0.0415184	0.818079	-0.24906	0.873107
22681457	22681957	AT1G61480	NA	1	22681315	22684475	0.679225	0.437318	22681457	22681957	AT1G61470	NA	1	22678184	22679021	0.638682	0.3923	287	1	22678486	22678986	+	1145	interaction39833	2971	29	0.070445	0	13	0.070445	1300	-23.8223	198	1236	-9.10623	1600	-28	0.192736	0.619082	-0.131154	0.849524
27872523	27873023	AT1G74120	Yes	1	27871273	27873260	0.58285	0.529982	27872523	27873023	AT1G74110	Yes	1	27866666	27868368	2.7997	4.11514	1591	1	27866598	27867098	+	87	interaction53869	5925	19	0.070445	0	7	0.070445	700	-9.66213	1490	60	-9.08699	1200	-16	-0.0882866	0.713613	1.12471	0.362669
20756088	20756588	AT1G55560	Yes	1	20754320	20756656	1.98587	3.0068	20756088	20756588	AT1G55550	Yes	1	20748914	20753079	0.837173	1.73964	1845	1	20750521	20751021	+	163	interaction35236	5567	39	0.070445	0	21	0.070445	2100	-48.0293	1581	120	-9.06778	1800	-44	NA	NA	-1.42341	9.81e-08
24938529	24939029	AT1G66852	NA	1	24938499	24938832	2.99237	3.28429	24938529	24939029	AT1G66830	Yes	1	24930664	24932918	0.603669	0.626703	2103	1	24931999	24932499	+	274	interaction47420	6530	23	0.070445	0	9	0.070445	900	-13.8356	1945	209	-9.06698	1400	-20	NA	NA	-0.186051	0.711188
11218045	11218545	AT2G26350	NA	2	11217438	11220507	0.710861	0.389501	11218045	11218545	AT2G26340	NA	2	11215251	11217033	0.825104	0.450405	233	2	11216368	11216868	+	843	interaction70081	1677	26	0.070445	0	11	0.070445	1100	-18.6576	192	761	-9.06316	1500	-24	0.0728456	0.649716	-0.130813	0.398307
15440552	15441052	AT2G36815	Yes	2	15440768	15441276	1.3852	1.12745	15440552	15441052	AT2G36810	NA	2	15425478	15439462	0.678547	0.470537	771	2	15437343	15437843	+	52	interaction80473	3209	12	0.070445	0.000113	3	0.070445	300	-2.55422	660	37	-9.06082	900	-8	-0.601434	NA	-0.180786	0.306007
9341483	9341983	AT2G21910	NA	2	9341497	9343030	2.03509	2.69494	9341483	9341983	AT2G21890	Yes	2	9331088	9332646	1.71088	5.8254	1645	2	9331953	9332453	+	1071	interaction67176	9530	24	0.085703	0	7	0.070445	700	-9.41673	1403	671	-9.05325	1272.71	-22	-1.17601	NA	-2.01044	0.00216169
23997935	23998435	AT1G64600	NA	1	23995970	23998720	0.595622	0.364187	23997935	23998435	AT1G64590	NA	1	23993532	23995509	2.59685	3.78441	113	1	23993444	23993944	+	1803	interaction43184	4491	16	0.070445	0	5	0.070445	500	-5.691	80	1397	-9.04583	1100	-12	0.159558	0.44654	-0.096681	0.816421
20764561	20765061	AT1G55580	NA	1	20764010	20765752	5.88495	9.40428	20764561	20765061	AT1G55570	NA	1	20757766	20760076	4.12921	6.37835	159	1	20758559	20759059	+	1771	interaction35312	6002	18	0.070445	0	6	0.070445	600	-7.49466	158	1250	-9.03704	1200	-14	-0.411227	0.475444	1.5594	NA
4680998	4681498	AT1G13650	NA	1	4680431	4682196	0.966201	0.959613	4680998	4681498	AT1G13640	NA	1	4677026	4679812	0.747317	0.315297	998	1	4678017	4678517	+	192	interaction9372	2981	21	0.070445	0	8	0.070445	800	-11.7002	1041	104	-9.03074	1300	-18	-2.12712	1.09e-33	0.35121	0.0317089
26673948	26674448	AT1G70740	NA	1	26673630	26675990	0.57522	0.339837	26673948	26674448	AT1G70710	NA	1	26659131	26663010	0.667791	0.443803	68	1	26662400	26662900	+	1548	interaction51317	11548	10	0.070445	0.020722	2	0.070445	200	-1.33098	37	1745	-9.00664	800	-6	0.0926201	0.6581	-0.153437	0.562391
12604877	12605377	AT1G34470	Yes	1	12604299	12607033	0.737801	0.534431	12604877	12605377	AT1G34460	Yes	1	12595109	12599628	2.75944	6.80063	1802	1	12599473	12599973	+	86	interaction24930	5404	14	0.070445	1e-06	4	0.070445	400	-4.02462	1622	55	-8.98079	1000	-10	-0.127982	0.414086	-2.45504	2.45e-14
18377484	18377984	AT2G44510	NA	2	18377069	18379210	0.773713	0.41818	18377484	18377984	AT2G44490	Yes	2	18364755	18367725	0.823482	0.846411	70	2	18365439	18365939	+	1827	interaction86513	12045	14	0.070445	1e-06	4	0.070445	400	-4.02462	55	1783	-8.98079	1000	-10	0.36894	0.0726772	0.455532	0.0326411
844401	844901	AT1G03410	NA	1	844435	847683	0.59263	0.522136	844401	844901	AT1G03400	NA	1	842746	844190	0.829341	0.679013	661	1	842513	843013	+	107	interaction1773	1888	16	0.070445	0	5	0.070445	500	-5.68349	715	88	-8.98054	1100	-12	-0.0232784	0.940321	0.0607053	0.804804
14446426	14446926	AT2G34210	Yes	2	14445937	14450522	1.16228	1.74944	14446426	14446926	AT2G34200	NA	2	14440647	14442005	0.772276	0.356729	1920	2	14441988	14442488	+	45	interaction77874	4438	10	0.070445	0.015323	2	0.070445	200	-1.33097	1616	39	-8.96861	800	-6	-0.431997	0.708634	0.136204	0.562679
7996019	7996519	AT1G22610	NA	1	7994290	7997588	0.668443	0.364371	7996019	7996519	AT1G22600	NA	1	7987140	7989217	1.37047	1.52754	143	1	7988181	7988681	+	1504	interaction15908	7838	21	0.070445	0	8	0.070445	800	-11.681	114	1314	-8.95758	1300	-18	0.0701007	0.743909	-0.750174	0.378153
11515031	11515531	AT1G32030	NA	1	11514593	11515595	3.13873	5.52916	11515031	11515531	AT1G32000	NA	1	11508284	11508909	0.477076	0.340968	1217	1	11508486	11508986	+	78	interaction22994	6545	10	0.070445	0.02212	2	0.070445	200	-1.33097	841	40	-8.9512	800	-6	-1.17601	NA	NA	NA
15068907	15069407	AT2G35890	Yes	2	15067174	15069136	0.692819	0.709619	15068907	15069407	AT2G35880	NA	2	15062987	15065870	0.564517	0.375952	1720	2	15064459	15064959	+	144	interaction79603	4448	21	0.070445	0	8	0.070445	800	-11.6793	1430	115	-8.95104	1300	-18	-0.59657	0.354784	0.65599	1.75e-05
5382491	5382991	AT1G15660	Yes	1	5381169	5385254	0.729471	0.416196	5382491	5382991	AT1G15620	NA	1	5373503	5374575	2.12024	3.82656	84	1	5373934	5374434	+	1855	interaction11132	8557	12	0.070445	0.000176	3	0.070445	300	-2.55024	42	1462	-8.93408	900	-8	-0.0186773	0.935999	-1.24712	NA
27103504	27104004	AT1G72000	Yes	1	27103276	27105663	1.33816	1.20679	27103504	27104004	AT1G71990	NA	1	27100283	27102262	0.717332	0.457158	1217	1	27101966	27102466	+	119	interaction52504	1538	28	0.070445	0	13	0.070445	1300	-24.2074	1027	96	-8.92163	1500	-28	2.26324	NA	0.297973	0.113271
28978049	28978549	AT1G77122	NA	1	28977356	28978743	0.609479	0.400737	28978049	28978549	AT1G77110	Yes	1	28970801	28974603	2.05504	3.04039	55	1	28970529	28971029	+	745	interaction55957	7520	10	0.070445	0.018138	2	0.070445	200	-1.33096	42	638	-8.91914	800	-6	-0.102034	0.459582	-0.28505	0.339502
3294085	3294585	AT1G10090	NA	1	3290310	3296198	0.658023	0.390808	3294085	3294585	AT1G10060	Yes	1	3284238	3287107	0.688652	1.32535	62	1	3284548	3285048	+	1058	interaction6254	9537	12	0.070445	0.000137	3	0.070445	300	-2.54956	43	1018	-8.91281	900	-8	-0.157192	0.292788	-0.584889	0.00041653
20482032	20482532	AT1G54940	NA	1	20481689	20484541	2.77366	3.70729	20482032	20482532	AT1G54930	Yes	1	20478266	20479671	1.76521	4.32867	1319	1	20478490	20478990	+	93	interaction34846	3542	12	0.070445	0.000188	3	0.070445	300	-2.54956	906	43	-8.91281	900	-8	-0.501493	0.401843	-2.02044	8.6e-05
7052479	7052979	AT1G20370	NA	1	7051576	7053641	0.667581	0.436742	7052479	7052979	AT1G20360	Yes	1	7046503	7047744	1.0367	1.93192	834	1	7046975	7047475	+	232	interaction13671	5504	18	0.070445	0	6	0.070445	600	-7.47387	757	229	-8.9124	1200	-14	0.113457	0.491702	NA	NA
21641533	21642033	AT1G58330	NA	1	21641129	21642041	2.71016	4.33298	21641533	21642033	AT1G58320	NA	1	21634122	21635303	1.52037	1.12533	2085	1	21634058	21634558	+	258	interaction37080	7475	18	0.070445	0	6	0.070445	600	-7.47104	1975	244	-8.89571	1200	-14	1.38019	NA	1.34632	0.000115276
13613104	13613604	AT2G31990	NA	2	13611350	13613573	0.871637	0.620523	13613104	13613604	AT2G31970	NA	2	13600490	13609069	0.717692	0.414887	1280	2	13601456	13601956	+	88	interaction75565	11648	14	0.070445	1e-06	4	0.070445	400	-4.01847	1379	61	-8.89466	1000	-10	0.211829	0.464297	0.0429041	0.816587
11142471	11142971	AT2G26170	NA	2	11140808	11143360	0.625929	0.453878	11142471	11142971	AT2G26160	Yes	2	11137977	11139451	2.83749	5.26617	73	2	11138512	11139012	+	1302	interaction69971	3959	12	0.070445	0.000159	3	0.070445	300	-2.54891	44	1124	-8.89264	900	-8	-0.35997	0.0236907	NA	NA
14485032	14485532	AT2G34320	Yes	2	14484958	14485837	1.47431	2.7717	14485032	14485532	AT2G34315	NA	2	14480218	14483056	1.75203	2.70344	1489	2	14480004	14480504	+	146	interaction78022	5028	21	0.070445	0	8	0.070445	800	-11.6636	1235	125	-8.89203	1300	-18	-2.23194	NA	0.927376	NA
963555	964055	AT1G03830	NA	1	962015	966757	0.741845	0.477657	963555	964055	AT1G03820	Yes	1	959868	960728	1.66243	2.87669	163	1	960444	960944	+	1545	interaction2124	3111	21	0.070445	0	8	0.070445	800	-11.6622	126	1271	-8.8867	1300	-18	0.0757529	0.676215	-0.610324	5.48e-05
8658124	8658624	AT1G24430	Yes	1	8658002	8659506	0.737803	0.932953	8658124	8658624	AT1G24400	Yes	1	8651406	8653828	1.70263	2.56178	1193	1	8652576	8653076	+	108	interaction17200	5548	14	0.070445	1e-06	4	0.070445	400	-4.01757	873	62	-8.88213	1000	-10	-0.448994	0.0871739	-0.478491	0.0330638
21185884	21186384	AT1G56550	Yes	1	21185661	21188369	1.57116	4.25881	21185884	21186384	AT1G56540	Yes	1	21181663	21185306	1.53385	5.3011	268	1	21182312	21182812	+	934	interaction36345	3572	18	0.070445	0	6	0.070445	600	-7.4687	258	797	-8.88196	1200	-14	-0.298354	0.171866	-1.46548	1.7e-08
23626961	23627461	AT1G63700	NA	1	23624665	23629112	0.789413	0.455946	23626961	23627461	AT1G63690	NA	1	23618377	23622396	0.647468	0.454813	73	1	23618429	23618929	+	1220	interaction42282	8532	12	0.070445	0.000159	3	0.070445	300	-2.54829	45	1324	-8.8735	900	-8	-0.0261338	0.858996	-0.230579	0.0989639
17128542	17129042	AT1G45201	NA	1	17123820	17128651	1.94112	2.40379	17128542	17129042	AT1G45191	NA	1	17116043	17119174	0.895788	0.897991	67	1	17116036	17116536	+	685	interaction26605	12506	10	0.070445	0.020559	2	0.070445	200	-1.33095	46	507	-8.86424	800	-6	-0.272482	0.293915	-0.826186	1.07e-05
717532	718032	AT2G02620	NA	2	717255	719380	3.01627	5.08079	717532	718032	AT2G02580	NA	2	701945	703770	0.897028	0.638328	85	2	702506	703006	+	1189	interaction59707	15026	10	0.070445	0.022895	2	0.070445	200	-1.33095	46	982	-8.86424	800	-6	-0.419973	0.74403	0.443902	0.740124
11193939	11194439	AT2G26290	NA	2	11192136	11194259	1.76238	1.71481	11193939	11194439	AT2G26270	NA	2	11184738	11187775	0.681793	0.427321	932	2	11185026	11185526	+	66	interaction69986	8913	10	0.070445	0.020386	2	0.070445	200	-1.33095	828	46	-8.86424	800	-6	-0.387721	0.227736	-0.117253	0.608881
13482037	13482537	AT2G31710	Yes	2	13481792	13483124	0.867925	0.385873	13482037	13482537	AT2G31690	NA	2	13476092	13477547	5.66728	8.26203	1055	2	13476990	13477490	+	68	interaction75444	5047	17	0.070445	0	6	0.070445	600	-7.66541	954	46	-8.86312	1100	-14	-0.0886728	0.672388	1.73974	NA
17786074	17786574	AT2G42720	Yes	2	17785408	17787421	1.60889	1.74052	17786074	17786574	AT2G42700	NA	2	17778273	17782187	0.510752	0.409662	1671	2	17779543	17780043	+	97	interaction85092	6531	14	0.070445	1e-06	4	0.070445	400	-4.01584	1349	64	-8.85838	1000	-10	-0.286492	0.623363	0.0489032	0.800399
12394471	12394971	AT2G28870	NA	2	12394255	12394915	3.31607	4.6946	12394471	12394971	AT2G28850	NA	2	12383479	12384961	2.94414	3.62361	1205	2	12384434	12384934	+	55	interaction72249	10037	12	0.070445	0.000121	3	0.070445	300	-2.5477	1156	46	-8.85531	900	-8	-0.412106	0.181531	NA	NA
8234112	8234612	AT1G23205	NA	1	8233996	8234893	2.17976	2.48032	8234112	8234612	AT1G23190	NA	1	8219868	8224469	0.635068	0.399097	1918	1	8223522	8224022	+	70	interaction16152	10590	10	0.070445	0.021031	2	0.070445	200	-1.33095	1906	47	-8.85213	800	-6	-0.647477	0.0012555	-0.258372	0.11452
12400620	12401120	AT2G28880	NA	2	12398744	12403528	0.758254	0.429357	12400620	12401120	AT2G28870	NA	2	12394255	12394915	3.31607	4.6946	74	2	12394095	12394595	+	728	interaction72311	6525	10	0.070445	0.021611	2	0.070445	200	-1.33095	47	672	-8.85213	800	-6	-0.233918	0.159374	-0.412106	0.181531
13082517	13083017	AT2G30700	NA	2	13081846	13085281	0.791664	0.464695	13082517	13083017	AT2G30660	NA	2	13058249	13061673	2.90366	4.36382	75	2	13060971	13061471	+	1974	interaction74473	21546	10	0.070445	0.021743	2	0.070445	200	-1.33095	47	1542	-8.85213	800	-6	-0.172205	0.321037	0.0477111	0.96415
168965	169465	AT2G01370	NA	2	168630	169642	0.69459	0.991599	168965	169465	AT2G01320	NA	2	154130	158182	0.627364	0.423741	1602	2	156540	157040	+	73	interaction59044	12425	10	0.070445	0.021471	2	0.070445	200	-1.33095	1200	48	-8.84056	800	-6	-0.89399	NA	0.0750042	0.692162
10262573	10263073	AT2G24140	NA	2	10262553	10264033	0.546701	0.442367	10262573	10263073	AT2G24130	NA	2	10258147	10261220	0.88379	0.683136	503	2	10258521	10259021	+	707	interaction68467	4052	23	0.070445	0	9	0.070445	900	-13.7617	446	596	-8.83934	1400	-20	-0.714915	0.0283515	-2.26015	0.168865
16441566	16442066	AT1G43640	NA	1	16439434	16441844	1.53781	1.44281	16441566	16442066	AT1G43630	NA	1	16436370	16437755	1.43422	0.789757	58	1	16436519	16437019	+	584	interaction26135	5047	12	0.070445	0.000128	3	0.070445	300	-2.54713	47	488	-8.838	900	-8	0.736194	0.491114	NA	NA
26163017	26163517	AT1G69570	Yes	1	26161527	26163496	0.620641	1.16587	26163017	26163517	AT1G69550	NA	1	26148020	26153555	0.825659	0.466001	1148	1	26153473	26153973	+	1210	interaction50125	9544	11	0.070445	0.003237	4	0.103673	271.795	-3.96626	1396	1436	-8.83276	828.205	-6	0.853989	0.000561207	-0.493016	0.000683515
16840878	16841378	AT2G40320	Yes	2	16840146	16842282	0.664848	0.911385	16840878	16841378	AT2G40300	NA	2	16831292	16833280	0.716592	0.479058	1803	2	16831423	16831923	+	57	interaction82539	9455	10	0.070445	0.018604	2	0.070445	200	-1.33094	1509	49	-8.82952	800	-6	-0.410196	0.0380839	-0.196706	0.610937
12615426	12615926	AT1G34510	Yes	1	12615732	12617032	2.72422	4.72908	12615426	12615926	AT1G34470	Yes	1	12604299	12607033	0.737801	0.534431	76	1	12604552	12605052	+	1146	interaction24972	10874	10	0.070445	0.021874	2	0.070445	200	-1.33094	50	1189	-8.81895	800	-6	0.0298725	0.962882	-0.127982	0.414086
7676029	7676529	AT2G17670	NA	2	7674350	7676157	0.794915	0.462216	7676029	7676529	AT2G17640	NA	2	7668077	7670495	0.760594	0.520186	80	2	7669476	7669976	+	1092	interaction64052	6553	10	0.070445	0.02236	2	0.070445	200	-1.33094	50	954	-8.81895	800	-6	0.248336	0.151158	-0.249664	0.113434
24121902	24122402	AT1G64930	NA	1	24120925	24122461	3.01019	5.83193	24121902	24122402	AT1G64920	NA	1	24117439	24118798	2.34049	3.74549	142	1	24118464	24118964	+	724	interaction43666	3438	16	0.070445	0	5	0.070445	500	-5.66318	121	592	-8.80907	1100	-12	0.242013	0.707406	-0.266098	0.606964
7430134	7430634	AT1G21230	Yes	1	7429979	7432346	0.50445	0.749503	7430134	7430634	AT1G21202	NA	1	7423517	7423611	0.358111	0.441395	877	1	7423585	7424085	+	78	interaction14156	6549	10	0.070445	0.02212	2	0.070445	200	-1.33094	534	51	-8.80884	800	-6	-0.927011	NA	NA	NA
8022910	8023410	AT1G22670	NA	1	8021853	8023516	0.77979	0.460553	8022910	8023410	AT1G22650	Yes	1	8013381	8015991	0.624678	1.31219	53	1	8014997	8015497	+	1490	interaction15982	7913	10	0.070445	0.017637	2	0.070445	200	-1.33094	51	1427	-8.80884	800	-6	1.237	NA	-0.678582	1.85e-07
22160472	22160972	AT1G60095	Yes	1	22160098	22162419	1.61689	1.55594	22160472	22160972	AT1G60090	Yes	1	22155581	22158065	1.01746	2.62524	779	1	22157983	22158483	+	636	interaction38785	2489	23	0.070445	0	9	0.070445	900	-13.7503	634	541	-8.80546	1400	-20	-0.778668	0.134204	-1.12715	NA
4556995	4557495	AT1G13300	NA	1	4556891	4558708	2.72422	4.38739	4556995	4557495	AT1G13290	NA	1	4550152	4551620	6.06707	9.37839	781	1	4550491	4550991	+	1052	interaction9126	6504	35	0.070445	0	17	0.070445	1700	-34.6066	766	999	-8.80029	1800	-36	-0.220844	0.198438	-4.1667	NA
1827378	1827878	AT1G06030	Yes	1	1826879	1828161	0.722478	0.804897	1827378	1827878	AT1G06010	NA	1	1822617	1823997	0.653254	0.421955	1949	1	1823022	1823522	+	238	interaction4049	4356	46	0.070445	0	26	0.070445	2600	-63.8166	1733	198	-8.79701	2000	-54	0.564243	0.665658	-0.156532	0.363475
27179990	27180490	AT1G72210	NA	1	27179789	27182430	2.79316	4.26003	27179990	27180490	AT1G72200	NA	1	27169794	27171321	1.35705	1.67449	400	1	27170971	27171471	+	1370	interaction52774	9019	18	0.070445	0	6	0.070445	600	-7.45376	408	1287	-8.79523	1200	-14	0.0205999	0.965181	-0.725389	0.000128124
4137529	4138029	AT1G12200	NA	1	4137532	4140028	2.53579	5.09801	4137529	4138029	AT1G12190	NA	1	4132966	4134094	3.19823	2.51354	214	1	4133000	4133500	+	1873	interaction8196	4529	37	0.070445	0	19	0.070445	1900	-41.0405	211	1660	-8.79264	1800	-40	0.0279297	0.913572	1.5188	NA
25426556	25427056	AT1G67810	NA	1	25426487	25427349	2.55319	2.66516	25426556	25427056	AT1G67800	NA	1	25420779	25423731	0.586918	0.386419	1600	1	25422450	25422950	+	153	interaction48582	4106	32	0.070445	0	16	0.070445	1600	-32.6757	1550	105	-8.79094	1600	-32	0.923038	6.5e-05	0.285187	0.168827
13021456	13021956	AT2G30575	NA	2	13020396	13024208	0.742911	0.356333	13021456	13021956	AT2G30560	NA	2	13017346	13018857	0.762512	0.553407	69	2	13017645	13018145	+	588	interaction74351	3811	12	0.070445	0.000152	3	0.070445	300	-2.54558	50	593	-8.79075	900	-8	0.0147411	0.950384	-0.833867	0.622585
19422079	19422579	AT1G52160	NA	1	19420714	19424439	0.73597	0.416113	19422079	19422579	AT1G52155	NA	1	19417665	19419853	0.848473	0.36584	153	1	19417485	19417985	+	1276	interaction31942	4594	16	0.070445	0	5	0.070445	500	-5.66024	128	1428	-8.78483	1100	-12	0.433872	0.00709424	-0.0703373	0.805549
10011002	10011502	AT1G28470	NA	1	10010180	10012198	2.09583	2.30264	10011002	10011502	AT1G28450	NA	1	10003965	10004523	3.0579	3.77631	161	1	10004037	10004537	+	1660	interaction19677	6965	31	0.070445	0	15	0.070445	1500	-29.5697	130	1491	-8.78244	1600	-32	0.060735	0.877539	0.435122	NA
10372077	10372577	AT1G29660	Yes	1	10371838	10373766	1.14937	6.19963	10372077	10372577	AT1G29630	NA	1	10349426	10353736	0.669471	0.393356	913	1	10351969	10352469	+	69	interaction20767	20108	10	0.070445	0.020877	2	0.070445	200	-1.33093	746	54	-8.78094	800	-6	-0.207869	0.0896889	-0.116004	0.576924
13148989	13149489	AT1G35614	NA	1	13148591	13149559	0.701827	0.293061	13148989	13149489	AT1G35610	NA	1	13143149	13144988	0.825121	0.481373	47	1	13144578	13145078	+	1200	interaction25870	4411	15	0.070445	0	5	0.070445	500	-5.81388	33	1039	-8.76954	1000	-12	-1.84942	NA	1.23765	0.197764
25614546	25615046	AT1G68340	NA	1	25614196	25615403	0.513413	0.379911	25614546	25615046	AT1G68330	Yes	1	25610922	25612202	1.57504	1.05689	922	1	25611439	25611939	+	1094	interaction48894	3107	35	0.070445	0	17	0.070445	1700	-34.5815	909	917	-8.76932	1800	-36	0.499851	0.0638099	0.709854	0.00495135
26057469	26057969	AT1G69310	NA	1	26054307	26058105	3.55798	4.22841	26057469	26057969	AT1G69295	NA	1	26050196	26052567	0.589654	0.292062	1013	1	26050495	26050995	+	65	interaction49784	6974	12	0.070445	0.000144	3	0.070445	300	-2.54464	1074	52	-8.76264	900	-8	0.0683047	0.773738	-0.0602652	0.756804
22008457	22008957	AT1G59810	Yes	1	22008603	22009455	1.80412	8.03272	22008457	22008957	AT1G59790	NA	1	22001503	22003385	3.83103	5.68445	1472	1	22002923	22003423	+	681	interaction38320	5534	18	0.070445	0	6	0.070445	600	-7.4466	1235	567	-8.75423	1200	-14	-1.75969	NA	3.29876	0.032742
252562	253062	AT1G01695	NA	1	252946	254495	0.62812	0.482806	252562	253062	AT1G01680	Yes	1	246410	248367	1.48564	8.18327	101	1	247528	248028	+	1080	interaction619	5034	14	0.070445	1e-06	4	0.070445	400	-4.00804	75	1047	-8.75272	1000	-10	-0.338316	0.722054	-0.335595	0.76541
977060	977560	AT1G03850	Yes	1	976096	977761	1.29529	1.70915	977060	977560	AT1G03840	NA	1	967502	970130	4.59765	7.51187	1815	1	969466	969966	+	870	interaction2272	7594	21	0.076813	0	9	0.083369	760.476	-13.7312	1901	848	-8.74869	1165.41	-18	0.0928425	0.73793	-0.263438	0.445992
26063036	26063536	AT1G69325	NA	1	26063204	26063736	0.652715	0.25899	26063036	26063536	AT1G69310	NA	1	26054307	26058105	3.55798	4.22841	73	1	26057452	26057952	+	1013	interaction49832	5584	10	0.070445	0.021471	2	0.070445	200	-1.33093	58	1074	-8.74859	800	-6	-0.0926892	0.822439	0.0683047	0.773738
9280846	9281346	AT2G21730	Yes	2	9280043	9281623	1.47657	4.99706	9280846	9281346	AT2G21710	NA	2	9270885	9273418	0.775912	0.547566	972	2	9272998	9273498	+	59	interaction66884	7848	10	0.070445	0.019041	2	0.070445	200	-1.33093	646	58	-8.74859	800	-6	-2.52864	1.14e-05	0.452461	0.020394
14836528	14837028	AT2G35210	Yes	2	14836061	14838149	0.78558	3.9033	14836528	14837028	AT2G35190	Yes	2	14830625	14833319	0.781674	0.447141	579	2	14832503	14833003	+	85	interaction78970	4025	10	0.070445	0.022895	2	0.070445	200	-1.33093	559	58	-8.74859	800	-6	-1.03198	0.0198776	0.0576762	0.825452
8400016	8400516	AT1G23750	Yes	1	8400150	8401487	0.989726	0.765185	8400016	8400516	AT1G23730	NA	1	8395556	8398144	2.14099	3.1807	1008	1	8395577	8396077	+	1340	interaction16465	4439	18	0.070445	0	8	0.086454	651.858	-11.5057	1231	1358	-8.74244	1148.14	-14	-0.199482	0.250733	-0.615574	0.0215187
10868573	10869073	AT1G30650	NA	1	10868302	10871297	3.76723	5.10392	10868573	10869073	AT1G30640	NA	1	10860654	10864700	0.617823	0.372791	954	1	10863999	10864499	+	70	interaction21624	4574	10	0.070445	0.021031	2	0.070445	200	-1.33093	657	59	-8.74123	800	-6	0.196967	0.439757	0.699862	0.00531702
5138562	5139062	AT1G14900	NA	1	5138333	5139432	0.558627	0.429452	5138562	5139062	AT1G14890	Yes	1	5137013	5137957	1.64669	1.77413	205	1	5137049	5137549	+	1786	interaction10608	1513	53	0.070445	0	32	0.070445	3200	-85.3913	174	1683	-8.74031	2100	-66	0.16795	0.351332	0.568474	0.00316329
17987048	17987548	AT1G48640	NA	1	17986357	17988991	0.910649	0.482857	17987048	17987548	AT1G48635	NA	1	17983703	17986116	0.663574	0.493009	1207	1	17985556	17986056	+	74	interaction28246	1492	17	0.070445	0	6	0.070445	600	-7.64545	961	50	-8.7375	1100	-14	0.422221	0.522607	-0.134632	0.427318
22791546	22792046	AT1G61720	Yes	1	22791167	22792800	0.953593	1.39552	22791546	22792046	AT1G61690	NA	1	22782606	22786859	0.752847	0.46402	1164	1	22784947	22785447	+	177	interaction40471	6599	16	0.070445	0	5	0.070445	500	-5.654	1033	146	-8.73382	1100	-12	-0.896191	NA	0.32804	0.023441
5588001	5588501	AT1G16340	NA	1	5587789	5590651	0.649754	0.37028	5588001	5588501	AT1G16300	NA	1	5574309	5577622	0.684486	0.449498	89	1	5574904	5575404	+	1847	interaction11427	13097	10	0.070445	0.023274	2	0.070445	200	-1.33092	61	1501	-8.72731	800	-6	-0.126307	0.476672	0.0759746	0.75042
8346936	8347436	AT2G19230	NA	2	8343451	8348431	0.787172	0.717504	8346936	8347436	AT2G19190	Yes	2	8326048	8329944	0.660929	1.7532	80	2	8329450	8329950	+	1513	interaction66085	17486	12	0.070445	0.000171	3	0.070445	300	-2.54337	55	1544	-8.72475	900	-8	0.747547	NA	3.34176	0.000104554
10054523	10055023	AT2G23630	Yes	2	10052565	10055317	1.64899	2.26536	10054523	10055023	AT2G23620	NA	2	10047378	10049291	1.08896	0.812245	985	2	10048948	10049448	+	767	interaction68253	5575	18	0.070445	0	6	0.070445	600	-7.44074	887	833	-8.72103	1200	-14	-0.0210535	0.970401	0.350762	0.431962
6424991	6425491	AT1G18660	NA	1	6421116	6425880	0.6904	0.465136	6424991	6425491	AT1G18620	NA	1	6409977	6414451	0.680008	0.399996	71	1	6410005	6410505	+	1163	interaction12437	14986	10	0.070445	0.02118	2	0.070445	200	-1.33092	62	1200	-8.72071	800	-6	-0.333929	0.0016324	-0.275743	0.0263911
22488688	22489188	AT1G61060	Yes	1	22488547	22489711	1.11592	1.55062	22488688	22489188	AT1G61030	NA	1	22477895	22482380	0.682459	0.421382	1902	1	22480058	22480558	+	83	interaction39333	8630	10	0.070445	0.022692	2	0.070445	200	-1.33092	1482	62	-8.72071	800	-6	3.3585	NA	0.0874702	0.567428
24586438	24586938	AT1G66040	NA	1	24583819	24586681	1.70008	2.01518	24586438	24586938	AT1G66020	NA	1	24577552	24580185	2.3424	3.46805	761	1	24578017	24578517	+	1249	interaction45715	8421	18	0.070445	0	6	0.070445	600	-7.44038	858	1044	-8.71898	1200	-14	1.67052	0.0349354	-0.454109	0.394993
12397537	12398037	AT1G34060	NA	1	12396419	12398369	0.684856	0.531177	12397537	12398037	AT1G34050	NA	1	12393494	12396006	1.60985	1.95163	91	1	12394506	12395006	+	339	interaction24723	3031	10	0.070445	0.02345	2	0.070445	200	-1.33092	63	256	-8.71433	800	-6	-1.28801	1.87e-05	-0.916303	0.527456
22898411	22898911	AT1G61940	Yes	1	22897398	22898575	0.766415	0.89817	22898411	22898911	AT1G61930	NA	1	22893100	22893976	0.463999	0.359444	1218	1	22893387	22893887	+	80	interaction40600	5024	10	0.070445	0.02236	2	0.070445	200	-1.33092	972	63	-8.71433	800	-6	0.747547	NA	-1.10887	0.0134687
19012031	19012531	AT1G51290	NA	1	19012172	19013306	4.58213	7.164	19012031	19012531	AT1G51240	NA	1	19000508	19000892	2.86286	4.2605	1283	1	19000399	19000899	+	1218	interaction30352	11632	18	0.076018	0	6	0.076231	554.453	-7.43745	1301	1133	-8.70245	1113.58	-14	NA	NA	NA	NA
17997902	17998402	AT2G43320	NA	2	17996649	17999927	0.685516	0.30454	17997902	17998402	AT2G43280	Yes	2	17989697	17991022	0.935348	0.469423	97	2	17990398	17990898	+	675	interaction85691	7504	10	0.070445	0.023927	2	0.070445	200	-1.33092	65	693	-8.70221	800	-6	0.064097	0.764377	-0.0247785	0.898686
30339505	30340005	AT1G80730	Yes	1	30339322	30340247	2.39099	4.3471	30339505	30340005	AT1G80720	NA	1	30336137	30337565	0.732161	0.407195	1825	1	30336989	30337489	+	453	interaction58645	2516	44	0.070445	0	24	0.070445	2400	-56.5087	1534	340	-8.69793	2000	-50	0.253606	0.67404	0.412701	0.037211
11406949	11407449	AT2G26770	NA	2	11404065	11408326	0.784205	0.439336	11406949	11407449	AT2G26750	NA	2	11395895	11397092	0.561836	0.546839	69	2	11396135	11396635	+	951	interaction70312	10814	10	0.070445	0.020877	2	0.070445	200	-1.33092	66	857	-8.69644	800	-6	-0.531499	1.09e-05	-2.6424	3.88e-06
19744623	19745123	AT1G53000	Yes	1	19745045	19747245	0.659227	0.458201	19744623	19745123	AT1G52990	NA	1	19740502	19743449	1.78322	2.06331	71	1	19743382	19743882	+	760	interaction32588	1241	10	0.070445	0.02118	2	0.070445	200	-1.33092	68	698	-8.68545	800	-6	0.0352436	0.828183	-0.721036	0.311032
2984868	2985368	AT1G09240	NA	1	2984880	2986130	2.83029	3.69273	2984868	2985368	AT1G09220	NA	1	2977791	2979466	0.644817	0.299795	952	1	2978941	2979441	+	60	interaction5598	5927	12	0.070445	0.000133	3	0.070445	300	-2.54188	810	59	-8.68084	900	-8	-1.80654	3.84e-20	0.315583	0.341448
8890031	8890531	AT1G25350	NA	1	8889109	8894261	0.7726	0.457269	8890031	8890531	AT1G25320	NA	1	8877856	8880310	0.931833	0.486092	81	1	8878454	8878954	+	1925	interaction17600	11577	12	0.070445	0.000172	3	0.070445	300	-2.54188	59	1470	-8.68084	900	-8	0.131669	0.316509	0.280395	0.0690669
12760814	12761314	AT2G29940	Yes	2	12760138	12766623	1.05262	3.14678	12760814	12761314	AT2G29930	NA	2	12756355	12758558	2.47395	3.66304	1053	2	12756919	12757419	+	103	interaction73773	3895	10	0.070445	0.024341	2	0.070445	200	-1.33092	953	69	-8.68021	800	-6	-0.586869	0.000447971	NA	NA
4819061	4819561	AT1G14070	NA	1	4818547	4820150	0.708863	0.406333	4819061	4819561	AT1G14040	NA	1	4810487	4814543	1.12937	1.23661	113	1	4810457	4810957	+	1732	interaction9724	8604	12	0.070445	0.000207	3	0.070445	300	-2.54154	60	1750	-8.67088	900	-8	NA	NA	0.146236	0.561492
4828430	4828930	AT1G14100	Yes	1	4827960	4829587	1.84835	2.38541	4828430	4828930	AT1G14070	NA	1	4818547	4820150	0.708863	0.406333	2101	1	4818949	4819449	+	113	interaction9742	9481	12	0.070445	0.000207	3	0.070445	300	-2.54154	1729	60	-8.67088	900	-8	-1.05328	0.458503	NA	NA
3511128	3511628	AT1G10620	Yes	1	3509000	3511975	1.42709	1.7232	3511128	3511628	AT1G10600	NA	1	3503703	3505502	0.655669	0.50066	690	1	3504963	3505463	+	89	interaction6587	6165	12	0.070445	0.000183	3	0.070445	300	-2.54121	717	61	-8.66127	900	-8	0.747547	NA	0.00715683	0.969541
21910552	21911052	AT1G59640	Yes	1	21909174	21911201	0.524585	1.14578	21910552	21911052	AT1G59620	Yes	1	21902283	21905685	0.668269	0.87924	212	1	21902483	21902983	+	1245	interaction37842	8069	27	0.070445	0	12	0.070445	1200	-21.2164	184	1217	-8.6567	1500	-26	-0.917995	0.00754832	-0.735499	0.00101084
4274533	4275033	AT1G12550	NA	1	4274593	4275981	0.859718	2.17226	4274533	4275033	AT1G12520	NA	1	4267105	4268926	0.727456	0.32351	977	1	4268007	4268507	+	124	interaction8525	6526	10	0.070445	0.025484	2	0.070445	200	-1.33092	1065	74	-8.65625	800	-6	-0.716951	0.000730508	-0.513982	0.00365033
23848490	23848990	AT1G64260	Yes	1	23847755	23849915	0.93693	1.05429	23848490	23848990	AT1G64255	Yes	1	23844953	23847206	2.81339	4.60374	753	1	23845419	23845919	+	1174	interaction42821	3071	43	0.070445	0	23	0.070445	2300	-52.9514	606	910	-8.65399	2000	-48	-0.158711	0.776026	0.747547	NA
26706029	26706529	AT1G70820	Yes	1	26705517	26708264	0.84782	1.45819	26706029	26706529	AT1G70800	NA	1	26702704	26703790	0.845818	1.03553	1449	1	26702507	26703007	+	84	interaction51332	3522	14	0.070445	1e-06	4	0.070445	400	-4.00054	1200	90	-8.6537	1000	-10	-0.517462	0.00533317	-1.85902	2.84e-11
29899062	29899562	AT1G79480	NA	1	29897726	29899604	0.711826	0.539006	29899062	29899562	AT1G79460	NA	1	29890391	29894587	0.629646	0.381805	1402	1	29891041	29891541	+	77	interaction58205	8021	12	0.070445	0.000166	3	0.070445	300	-2.5409	1297	62	-8.652	900	-8	-0.0964216	0.873133	-0.334414	0.190004
11527046	11527546	AT2G27010	Yes	2	11526167	11527854	0.96903	1.51979	11527046	11527546	AT2G26980	NA	2	11514702	11518734	0.613632	0.369124	1389	2	11516443	11516943	+	102	interaction70598	10603	12	0.070445	0.000197	3	0.070445	300	-2.5409	1223	62	-8.652	900	-8	0.20895	0.597223	-0.143838	0.279118
19012955	19013455	AT1G51290	NA	1	19012172	19013306	4.58213	7.164	19012955	19013455	AT1G51270	NA	1	19007509	19011272	2.82793	4.42619	1258	1	19008410	19008910	+	1325	interaction30381	4545	36	0.081084	0	15	0.070445	1500	-28.9197	1085	1149	-8.64907	1627.61	-38	NA	NA	0.459494	0.0215605
9756944	9757444	AT1G28000	Yes	1	9756673	9757963	1.45024	1.79308	9756944	9757444	AT1G27980	NA	1	9748736	9752769	0.684739	0.44834	769	1	9748498	9748998	+	107	interaction18873	8446	10	0.070445	0.024596	2	0.070445	200	-1.33091	617	77	-8.64346	800	-6	NA	NA	0.543866	0.00392092
4279916	4280416	AT1G12570	NA	1	4277992	4280862	2.66449	3.53693	4279916	4280416	AT1G12540	NA	1	4272959	4274206	2.41122	3.08332	91	1	4273596	4274096	+	1133	interaction8603	6320	10	0.070445	0.02345	2	0.070445	200	-1.33091	78	991	-8.63943	800	-6	0.595536	0.195221	NA	NA
121436	121936	AT2G01210	NA	2	119440	121846	0.575976	0.32362	121436	121936	AT2G01180	NA	2	106899	108803	0.556336	0.380111	1403	2	107564	108064	+	90	interaction58955	13872	10	0.070445	0.023363	2	0.070445	200	-1.33091	1313	78	-8.63943	800	-6	-0.0394368	0.908236	0.67828	0.00712951
27998063	27998563	AT1G74500	NA	1	27998174	27998821	4.57984	7.3847	27998063	27998563	AT1G74480	Yes	1	27993031	27994178	0.664187	0.650689	1095	1	27993577	27994077	+	240	interaction54325	4486	16	0.070445	0	5	0.070445	500	-5.64176	944	202	-8.63566	1100	-12	-0.328001	0.460695	NA	NA
15296960	15297460	AT2G36460	NA	2	15296700	15298514	0.653444	0.464789	15296960	15297460	AT2G36430	Yes	2	15290203	15291763	0.917467	1.66803	96	2	15290541	15291041	+	838	interaction80232	6419	12	0.070445	0.000191	3	0.070445	300	-2.54029	64	978	-8.63442	900	-8	-0.0747379	0.685347	-0.756708	2.92e-05
1635068	1635568	AT1G05520	Yes	1	1630899	1635711	0.775409	0.475287	1635068	1635568	AT1G05500	NA	1	1624954	1629224	0.855591	0.509289	1116	1	1628034	1628534	+	105	interaction3322	7034	10	0.070445	0.02447	2	0.070445	200	-1.33091	1251	80	-8.63168	800	-6	0.291117	0.0241334	-0.0499586	0.74073
10265908	10266408	AT2G24150	NA	2	10265483	10267405	0.715627	0.539298	10265908	10266408	AT2G24130	NA	2	10258147	10261220	0.88379	0.683136	314	2	10259037	10259537	+	1856	interaction68501	6871	33	0.070445	0	16	0.070445	1600	-31.9514	316	1502	-8.62253	1700	-34	-0.461896	3.27e-07	-2.26015	0.168865
607448	607948	AT1G02780	NA	1	607807	609465	0.685741	0.489085	607448	607948	AT1G02720	NA	1	591825	594236	0.611206	0.389329	78	1	592508	593008	+	1970	interaction1392	14940	10	0.070445	0.02212	2	0.070445	200	-1.33091	83	1898	-8.62079	800	-6	-0.131961	0.313336	0.14201	0.3228
7749520	7750020	AT1G22010	NA	1	7749570	7750062	4.7424	8.66987	7749520	7750020	AT1G21980	NA	1	7734738	7738661	0.701525	0.420519	1072	1	7737041	7737541	+	100	interaction14905	12479	10	0.070445	0.024144	2	0.070445	200	-1.33091	966	83	-8.62079	800	-6	NA	NA	0.477314	0.000196291
24687108	24687608	AT1G66240	NA	1	24686255	24687332	0.666	0.46243	24687108	24687608	AT1G66235	NA	1	24683005	24683874	1.5821	1.47969	92	1	24683387	24683887	+	1316	interaction46152	3721	10	0.070445	0.023533	2	0.070445	200	-1.33091	83	1175	-8.62079	800	-6	0.0845033	0.604567	NA	NA
22746536	22747036	AT1G61640	NA	1	22746371	22749184	0.669557	0.443728	22746536	22747036	AT1G61630	NA	1	22744206	22746111	2.9307	4.22859	230	1	22744156	22744656	+	621	interaction40267	2380	16	0.070445	0	5	0.070445	500	-5.63957	217	573	-8.61831	1100	-12	0.513055	0.0278256	2.90518	NA
1627446	1627946	AT1G05500	NA	1	1624954	1629224	0.855591	0.509289	1627446	1627946	AT1G05490	NA	1	1618601	1623452	0.604294	0.456413	139	1	1622536	1623036	+	1272	interaction3297	4910	14	0.070445	1e-06	4	0.070445	400	-3.9975	98	862	-8.61422	1000	-10	-0.0499586	0.74073	-0.711736	0.0426352
7503430	7503930	AT1G21440	Yes	1	7502158	7504175	0.713394	0.439921	7503430	7503930	AT1G21400	NA	1	7493425	7496710	0.726715	0.482297	112	1	7493988	7494488	+	1756	interaction14609	9442	10	0.070445	0.024882	2	0.070445	200	-1.33091	86	1993	-8.61071	800	-6	-0.0506142	0.73789	1.05703	0.0531519
18777880	18778380	AT1G50680	Yes	1	18777600	18778614	0.801014	2.12189	18777880	18778380	AT1G50660	NA	1	18770936	18774686	0.673421	0.424112	1135	1	18773535	18774035	+	70	interaction29571	4345	15	0.070445	0	5	0.070445	500	-5.79584	961	36	-8.60868	1000	-10	-1.17601	NA	-0.0382019	0.822713
14485047	14485547	AT2G34320	Yes	2	14484958	14485837	1.47431	2.7717	14485047	14485547	AT2G34310	NA	2	14477714	14479988	0.620842	0.446461	1489	2	14479495	14479995	+	135	interaction78021	5552	19	0.070445	0	7	0.070445	700	-9.56022	1235	95	-8.6057	1200	-16	-2.23194	NA	-0.266427	0.0625252
26714528	26715028	AT1G70850	NA	1	26714865	26716829	3.39207	5.72618	26714528	26715028	AT1G70820	Yes	1	26705517	26708264	0.84782	1.45819	103	1	26705989	26706489	+	1449	interaction51423	8539	10	0.070445	0.024341	2	0.070445	200	-1.33091	88	1200	-8.60438	800	-6	-0.256202	0.416639	-0.517462	0.00533317
1008913	1009413	AT2G03330	Yes	2	1008459	1014122	1.104	1.92667	1008913	1009413	AT2G03300	NA	2	1003467	1004222	2.18173	4.81672	1525	2	1004145	1004645	+	69	interaction60028	4768	12	0.070445	0.000152	3	0.070445	300	-2.53919	1470	68	-8.60263	900	-8	0.0922266	0.634065	NA	NA
11716607	11717107	AT2G27385	NA	2	11716000	11717432	1.41816	1.79032	11716607	11717107	AT2G27370	NA	2	11708449	11710004	2.21729	2.34522	1451	2	11708977	11709477	+	236	interaction70845	7630	16	0.070445	0	5	0.070445	500	-5.63754	1330	233	-8.60234	1100	-12	-0.599259	0.00225195	-0.683818	0.0305613
9130985	9131485	AT1G26390	Yes	1	9130016	9131779	2.23707	4.01143	9130985	9131485	AT1G26380	Yes	1	9126736	9128528	2.05706	2.59007	540	1	9127918	9128418	+	320	interaction17926	3067	16	0.070445	0	5	0.070445	500	-5.63743	446	234	-8.60142	1100	-12	3.04146	1.66e-19	4.48172	3.57e-49
4788500	4789000	AT1G13980	NA	1	4788462	4794654	0.614959	0.429583	4788500	4789000	AT1G13960	NA	1	4776462	4779400	0.720427	0.375434	85	1	4776611	4777111	+	1985	interaction9606	11889	12	0.070445	0.000178	3	0.070445	300	-2.53893	69	1847	-8.59531	900	-8	0.251071	0.0199933	0.231682	0.0521156
22949962	22950462	AT1G62085	Yes	1	22948756	22950142	0.654714	0.644425	22949962	22950462	AT1G62050	NA	1	22936126	22939024	0.570035	0.354801	1518	1	22937553	22938053	+	101	interaction40748	12409	10	0.070445	0.024214	2	0.070445	200	-1.33091	1620	94	-8.5871	800	-6	-0.60439	0.000158135	-0.307926	0.140708
23504975	23505475	AT1G63370	NA	1	23503204	23505358	1.02608	1.37523	23504975	23505475	AT1G63360	NA	1	23499514	23502169	0.933043	1.14903	91	1	23501593	23502093	+	783	interaction41983	3382	10	0.070445	0.02345	2	0.070445	200	-1.33091	94	760	-8.5871	800	-6	0.509807	0.469653	-0.707978	5.76e-05
27979094	27979594	AT1G74440	Yes	1	27976501	27980404	0.739847	0.608047	27979094	27979594	AT1G74410	NA	1	27965550	27967926	0.811651	0.433217	555	1	27967012	27967512	+	139	interaction54179	12082	10	0.070445	0.02609	2	0.070445	200	-1.33091	531	97	-8.5793	800	-6	0.0672538	0.860193	0.0100449	0.962993
1639982	1640482	AT1G05540	Yes	1	1639285	1640811	0.897046	2.3403	1639982	1640482	AT1G05500	NA	1	1624954	1629224	0.855591	0.509289	1748	1	1627522	1628022	+	139	interaction3383	12460	10	0.070445	0.02609	2	0.070445	200	-1.33091	1348	98	-8.57681	800	-6	-1.62535	2.47e-07	-0.0499586	0.74073
4868981	4869481	AT1G14250	Yes	1	4868451	4871488	1.51806	1.92668	4868981	4869481	AT1G14230	NA	1	4861265	4864094	0.725717	0.565306	1215	1	4862537	4863037	+	114	interaction10098	6444	10	0.070445	0.024988	2	0.070445	200	-1.33091	1186	98	-8.57681	800	-6	-0.396348	0.210887	-0.0712255	0.687453
19312936	19313436	AT1G51965	NA	1	19312077	19314145	0.799684	0.412542	19312936	19313436	AT1G51930	NA	1	19294837	19295236	2.09885	3.30217	134	1	19294960	19295460	+	835	interaction31620	17976	10	0.070445	0.025907	2	0.070445	200	-1.33091	98	836	-8.57681	800	-6	0.128987	0.439777	NA	NA
15529452	15529952	AT2G36970	NA	2	15529005	15530749	1.33053	1.10058	15529452	15529952	AT2G36960	NA	2	15522919	15527758	0.670739	0.374115	1399	2	15525999	15526499	+	111	interaction80692	3453	26	0.070445	0	12	0.070445	1200	-21.6421	1602	80	-8.57416	1400	-24	-0.232679	0.407752	0.0534858	0.78415
26732429	26732929	AT1G70900	NA	1	26731812	26733875	0.723833	0.453584	26732429	26732929	AT1G70890	NA	1	26725625	26726544	3.36749	4.13765	128	1	26726092	26726592	+	1582	interaction51726	6337	10	0.070445	0.025659	2	0.070445	200	-1.33091	100	1490	-8.57198	800	-6	-0.14199	0.442792	-0.0495901	0.869636
26227462	26227962	AT1G69720	Yes	1	26226865	26228580	1.05415	2.01403	26227462	26227962	AT1G69660	NA	1	26199622	26200603	2.37696	2.75999	145	1	26199934	26200434	+	1728	interaction50498	27528	10	0.070445	0.026301	2	0.070445	200	-1.3309	106	1333	-8.55865	800	-6	-0.899548	0.075756	0.760588	NA
24470462	24470962	AT1G65790	Yes	1	24468931	24472329	1.63894	3.39407	24470462	24470962	AT1G65780	Yes	1	24462957	24466888	1.59285	3.26215	285	1	24466577	24467077	+	1630	interaction45135	3885	21	0.070445	0	8	0.070445	800	-11.5699	265	1403	-8.55514	1300	-18	-1.18344	0.0367871	1.16326	NA
26757062	26757562	AT1G70960	Yes	1	26756252	26757362	1.74911	4.97119	26757062	26757562	AT1G70949	Yes	1	26752400	26752664	0.369611	0.703058	135	1	26752178	26752678	+	855	interaction51817	4884	10	0.070445	0.025946	2	0.070445	200	-1.3309	109	791	-8.55255	800	-6	NA	NA	NA	NA
16626950	16627450	AT2G39840	NA	2	16627257	16629289	0.702302	0.337949	16626950	16627450	AT2G39820	Yes	2	16618276	16619689	1.27816	1.88594	89	2	16618389	16618889	+	1334	interaction82198	8561	10	0.070445	0.023274	2	0.070445	200	-1.3309	109	1292	-8.55255	800	-6	0.0456706	0.821912	-1.14351	0.4664
7575532	7576032	AT2G17442	NA	2	7573834	7575939	0.701233	0.492859	7575532	7576032	AT2G17420	NA	2	7564344	7566539	0.686594	0.373179	86	2	7564975	7565475	+	2103	interaction63953	10557	12	0.070445	0.000179	3	0.070445	300	-2.53734	76	1932	-8.54988	900	-8	-0.0672489	0.839229	0.197528	0.0660054
10401492	10401992	AT2G24500	NA	2	10401034	10402934	0.753087	0.576314	10401492	10401992	AT2G24490	Yes	2	10397376	10400498	0.578825	0.729917	166	2	10398374	10398874	+	870	interaction68878	3118	14	0.070445	1e-06	4	0.070445	400	-3.99246	115	795	-8.5497	1000	-10	0.195841	0.233327	-0.386583	0.0564084
6993474	6993974	AT1G20160	NA	1	6990783	6993972	0.657234	0.602381	6993474	6993974	AT1G20135	Yes	1	6984123	6985498	2.03289	3.69494	157	1	6984900	6985400	+	757	interaction13398	8574	10	0.070445	0.026682	2	0.070445	200	-1.3309	111	656	-8.54868	800	-6	-0.290651	0.129765	NA	NA
12609454	12609954	AT2G29380	Yes	2	12608701	12610167	1.54511	2.8829	12609454	12609954	AT2G29300	NA	2	12588190	12589759	0.945241	0.857921	142	2	12588478	12588978	+	1812	interaction73008	20976	10	0.070445	0.026196	2	0.070445	200	-1.3309	112	1680	-8.5468	800	-6	-1.51281	0.331151	-1.42039	1.38e-21
29021459	29021959	AT1G77250	NA	1	29020264	29023474	0.81615	0.413472	29021459	29021959	AT1G77220	NA	1	29012716	29015803	0.699231	0.490078	125	1	29012615	29013115	+	2092	interaction56057	8844	10	0.070445	0.025527	2	0.070445	200	-1.3309	114	1997	-8.54313	800	-6	0.0297011	0.903748	0.0260019	0.879251
18913140	18913640	AT1G51020	NA	1	18913109	18913828	4.75243	7.43682	18913140	18913640	AT1G51000	NA	1	18909923	18910142	4.65644	6.90399	445	1	18909954	18910454	+	1199	interaction29792	3186	16	0.070445	0	5	0.070445	500	-5.62979	325	956	-8.54183	1100	-12	NA	NA	NA	NA
29635460	29635960	AT1G78820	NA	1	29634123	29635813	1.06876	1.07256	29635460	29635960	AT1G78815	NA	1	29631742	29632745	5.99785	8.95484	1422	1	29632076	29632576	+	150	interaction57686	3384	19	0.070445	0	7	0.070445	700	-9.54541	1684	104	-8.5402	1200	-16	-0.23828	0.435973	-0.589599	0.128391
22259527	22260027	AT1G60410	NA	1	22258981	22260715	3.39911	5.34281	22259527	22260027	AT1G60390	Yes	1	22247473	22249636	1.11301	1.81365	1088	1	22247557	22248057	+	105	interaction38917	11970	10	0.070445	0.02447	2	0.070445	200	-1.3309	828	116	-8.5396	800	-6	NA	NA	-0.711331	0.000180577
17578831	17579331	AT2G42170	NA	2	17577713	17580392	0.960746	0.860867	17578831	17579331	AT2G42150	NA	2	17572368	17574679	0.58971	0.447177	872	2	17572980	17573480	+	120	interaction84626	5851	10	0.070445	0.025298	2	0.070445	200	-1.3309	747	116	-8.5396	800	-6	0.883416	2.91e-13	-0.313199	0.680739
12934455	12934955	AT2G30350	NA	2	12934149	12935773	0.687281	0.496361	12934455	12934955	AT2G30330	NA	2	12928766	12929737	0.513719	0.411463	827	2	12928571	12929071	+	136	interaction74099	5884	10	0.070445	0.025986	2	0.070445	200	-1.3309	772	118	-8.53619	800	-6	0.364107	0.0530947	0.0766019	0.744582
11349540	11350040	AT1G31710	NA	1	11349839	11355486	1.7815	1.75054	11349540	11350040	AT1G31690	NA	1	11343979	11347767	3.1665	3.42435	1349	1	11347012	11347512	+	82	interaction22658	2528	12	0.070445	0.000173	3	0.070445	300	-2.53674	1186	79	-8.53306	900	-8	0.200663	0.158627	-0.489736	0.331726
14867989	14868489	AT2G35320	NA	2	14866831	14868860	0.712214	0.456421	14867989	14868489	AT2G35270	NA	2	14857020	14857878	4.72036	7.73945	86	2	14857099	14857599	+	1313	interaction79068	10890	12	0.070445	0.000179	3	0.070445	300	-2.53674	79	1211	-8.53306	900	-8	0.12945	0.350595	0.0475839	0.919085
4830496	4830996	AT1G14110	Yes	1	4830296	4831915	4.0565	6.83673	4830496	4830996	AT1G14080	NA	1	4822527	4824414	0.76331	0.511559	1060	1	4822975	4823475	+	177	interaction9781	7521	14	0.070445	1e-06	4	0.070445	400	-3.99103	785	121	-8.53151	1000	-10	NA	NA	0.528662	0.0416994
22920463	22920963	AT1G62020	Yes	1	22919533	22924024	0.735787	0.424412	22920463	22920963	AT1G62010	NA	1	22915744	22917330	0.802277	0.376165	977	1	22917023	22917523	+	71	interaction40696	3440	17	0.070445	0	6	0.070445	600	-7.61086	613	59	-8.52889	1100	-14	0.287883	0.173549	0.437378	0.0598622
8658459	8658959	AT1G24430	Yes	1	8658002	8659506	0.737803	0.932953	8658459	8658959	AT1G24405	NA	1	8655245	8655650	1.17076	1.74985	702	1	8655055	8655555	+	111	interaction17210	3404	12	0.070445	0.000205	3	0.070445	300	-2.53656	423	80	-8.52775	900	-8	-0.448994	0.0871739	-0.783027	0.153364
14500065	14500565	AT2G34357	NA	2	14498589	14505727	0.879247	0.484333	14500065	14500565	AT2G34350	NA	2	14493585	14495802	1.93434	1.51325	189	2	14493107	14493607	+	1679	interaction78106	6958	12	0.070445	0.000246	3	0.070445	300	-2.53656	80	1610	-8.52775	900	-8	0.0723768	0.662318	-0.595265	0.401739
22493932	22494432	AT1G61080	Yes	1	22493193	22497019	1.15354	1.83034	22493932	22494432	AT1G61060	Yes	1	22488547	22489711	1.11592	1.55062	338	1	22488676	22489176	+	1902	interaction39403	5256	21	0.070445	0	8	0.070445	800	-11.5618	294	1482	-8.52713	1300	-18	0.0950956	0.886896	3.3585	NA
11396532	11397032	AT2G26750	NA	2	11395895	11397092	0.561836	0.546839	11396532	11397032	AT2G26730	NA	2	11388406	11391641	0.594385	0.389192	779	2	11388619	11389119	+	97	interaction70261	7913	10	0.070445	0.023927	2	0.070445	200	-1.3309	677	128	-8.52081	800	-6	-2.6424	3.88e-06	-0.403436	0.010664
25269994	25270494	AT1G67460	Yes	1	25269625	25271861	0.921508	0.843827	25269994	25270494	AT1G67450	NA	1	25266162	25267359	1.74509	1.90442	112	1	25266885	25267385	+	497	interaction48336	3109	12	0.070445	0.000206	3	0.070445	300	-2.53619	82	418	-8.51756	900	-8	-0.692029	0.111202	NA	NA
562365	562865	AT1G02630	Yes	1	560609	562424	0.750484	1.07501	562365	562865	AT1G02610	NA	1	553049	555994	0.78621	0.430815	906	1	553017	553517	+	150	interaction1202	9348	10	0.070445	0.026469	2	0.070445	200	-1.3309	968	131	-8.51666	800	-6	-0.426152	0.371988	-0.0439376	0.889891
21179005	21179505	AT1G56530	Yes	1	21179236	21180888	1.12609	2.47377	21179005	21179505	AT1G56520	Yes	1	21174663	21178974	1.21813	3.29238	849	1	21176029	21176529	+	129	interaction36303	2976	10	0.070445	0.025699	2	0.070445	200	-1.3309	885	132	-8.51533	800	-6	NA	NA	-2.64047	3.33e-54
3061061	3061561	AT1G09483	NA	1	3060991	3061729	2.88965	2.9055	3061061	3061561	AT1G09450	NA	1	3049023	3053112	0.719495	0.501762	1907	1	3050472	3050972	+	110	interaction5750	10589	17	0.070445	0	6	0.070445	600	-7.60769	1714	60	-8.51028	1100	-14	-0.589178	NA	-0.192906	0.599829
19754531	19755031	AT1G53023	Yes	1	19754213	19755843	1.66961	5.615	19754531	19755031	AT1G53000	Yes	1	19745045	19747245	0.659227	0.458201	1422	1	19744960	19745460	+	152	interaction32622	9571	14	0.070445	1e-06	4	0.070445	400	-3.98932	1108	129	-8.51004	1000	-10	NA	NA	0.0352436	0.828183
29713530	29714030	AT1G78990	Yes	1	29713530	29714969	0.971265	1.24475	29713530	29714030	AT1G78980	Yes	1	29707686	29711421	0.902468	2.44795	365	1	29710455	29710955	+	1573	interaction57909	3075	41	0.070445	0	22	0.070445	2200	-50.1211	311	1440	-8.50758	1900	-46	-1.11054	0.000213287	0.747547	NA
2129537	2130037	AT1G06930	NA	1	2128842	2129883	0.854384	0.971658	2129537	2130037	AT1G06920	Yes	1	2124853	2125801	1.09906	0.861013	96	1	2125042	2125542	+	930	interaction4438	4495	23	0.070445	0	10	0.070445	1000	-16.5602	70	902	-8.5033	1300	-20	0.375214	0.569824	0.747547	NA
26898033	26898533	AT1G71370	Yes	1	26897004	26899434	1.22097	1.19794	26898033	26898533	AT1G71360	NA	1	26892099	26894802	0.624142	0.455704	462	1	26893939	26894439	+	142	interaction52118	4094	10	0.070445	0.026196	2	0.070445	200	-1.3309	296	145	-8.49966	800	-6	-1.43086	0.163603	0.24781	0.306922
15726943	15727443	AT2G37460	Yes	2	15726447	15729098	1.25197	1.97233	15726943	15727443	AT2G37450	NA	2	15722567	15725062	0.811751	0.593527	119	2	15724032	15724532	+	699	interaction80894	2911	12	0.070445	0.000211	3	0.070445	300	-2.53536	87	762	-8.49426	900	-8	-1.1533	4.38e-07	-0.640112	4.67e-07
24521419	24521919	AT1G65910	NA	1	24520790	24524164	3.4112	5.78582	24521419	24521919	AT1G65890	NA	1	24512456	24514659	2.85175	5.34727	119	1	24513475	24513975	+	1629	interaction45449	7944	12	0.070445	0.000211	3	0.070445	300	-2.53521	88	1235	-8.48994	900	-8	-0.364908	0.274462	-2.10819	0.00519371
26876014	26876514	AT1G71300	Yes	1	26874063	26878340	0.76732	0.752846	26876014	26876514	AT1G71280	Yes	1	26870140	26872152	1.0134	0.924283	243	1	26870735	26871235	+	354	interaction52078	5279	10	0.070445	0.028449	2	0.070445	200	-1.3309	158	224	-8.48664	800	-6	0.479591	NA	-0.594444	0.433734
13945598	13946098	AT2G32870	NA	2	13944610	13946790	2.43925	3.71889	13945598	13946098	AT2G32860	NA	2	13940186	13943804	2.78122	3.54832	468	2	13943438	13943938	+	170	interaction76974	2160	10	0.070445	0.027038	2	0.070445	200	-1.3309	386	162	-8.48307	800	-6	0.019197	0.915888	-0.00418939	0.989199
19549459	19549959	AT1G52460	NA	1	19549330	19551282	2.6233	3.39648	19549459	19549959	AT1G52440	NA	1	19538820	19540907	1.89055	2.29655	701	1	19538950	19539450	+	1617	interaction32209	10509	16	0.070445	0	5	0.070445	500	-5.62151	564	1428	-8.47823	1100	-12	NA	NA	0.747547	NA
157451	157951	AT1G01430	NA	1	156800	158655	0.661526	0.43818	157451	157951	AT1G01400	Yes	1	150688	152210	1.12408	2.54132	93	1	151536	152036	+	945	interaction321	5915	12	0.070445	0.000188	3	0.070445	300	-2.53476	91	862	-8.47758	900	-8	-0.10335	0.475788	NA	NA
9684985	9685485	AT2G22770	NA	2	9684724	9686595	1.10579	1.1117	9684985	9685485	AT2G22750	NA	2	9672143	9673928	5.06962	7.71898	166	2	9672401	9672901	+	1446	interaction67698	12584	10	0.070445	0.026931	2	0.070445	200	-1.3309	172	1103	-8.47488	800	-6	-0.691779	0.333401	0.469182	0.740927
9746936	9747436	AT1G27970	NA	1	9746810	9748467	0.705091	0.446631	9746936	9747436	AT1G27950	NA	1	9740703	9742159	1.14173	1.25869	134	1	9740497	9740997	+	1228	interaction18863	6439	25	0.070445	0	11	0.070445	1100	-18.8148	118	1093	-8.47385	1400	-24	0.442799	0.00864921	-0.0597614	0.752884
16258965	16259465	AT2G38940	Yes	2	16257227	16260225	0.84261	2.05863	16258965	16259465	AT2G38920	Yes	2	16248145	16251002	3.81129	6.5521	187	2	16249992	16250492	+	1675	interaction81707	8973	14	0.070445	2e-06	4	0.070445	400	-3.98587	149	1401	-8.46694	1000	-10	0.23771	0.610211	-0.0318761	0.98901
10632930	10633430	AT1G30220	Yes	1	10632820	10635471	0.937709	1.94254	10632930	10633430	AT1G30170	Yes	1	10607887	10609618	2.23464	4.45507	207	1	10608990	10609490	+	1766	interaction21324	23940	10	0.070445	0.02785	2	0.070445	200	-1.3309	184	1387	-8.46625	800	-6	-1.36356	9.43e-06	-1.12715	NA
21174995	21175495	AT1G56520	Yes	1	21174663	21178974	1.21813	3.29238	21174995	21175495	AT1G56510	Yes	1	21167588	21173632	0.863248	1.12802	281	1	21167518	21168018	+	717	interaction36279	7477	10	0.070445	0.028926	2	0.070445	200	-1.3309	208	683	-8.45205	800	-6	-2.64047	3.33e-54	-0.0546982	0.914419
10211968	10212468	AT1G29220	NA	1	10210519	10212722	0.616552	0.401224	10211968	10212468	AT1G29179	Yes	1	10198763	10200255	1.2903	2.13629	102	1	10199102	10199602	+	1104	interaction20425	12866	12	0.070445	0.000197	3	0.070445	300	-2.53383	98	1031	-8.45187	900	-8	-0.0746479	0.64015	-0.126183	0.88987
13729414	13729914	AT2G32320	NA	2	13726818	13731767	0.688383	0.49334	13729414	13729914	AT2G32300	Yes	2	13722426	13723590	0.435281	0.805618	313	2	13722963	13723463	+	1375	interaction76038	6451	10	0.070445	0.029241	2	0.070445	200	-1.3309	212	1170	-8.45	800	-6	0.0564842	0.776462	-0.390165	0.106781
18492077	18492577	AT1G49952	NA	1	18492122	18493258	0.86007	0.471218	18492077	18492577	AT1G49940	Yes	1	18488359	18491179	0.677371	0.843858	113	1	18488274	18488774	+	689	interaction29338	3803	12	0.070445	0.000207	3	0.070445	300	-2.53348	101	454	-8.442	900	-8	0.0387481	0.964945	-0.330008	0.257968
8578452	8578952	AT1G24220	Yes	1	8578657	8582413	0.846643	1.49947	8578452	8578952	AT1G24200	Yes	1	8571172	8572377	1.05776	0.975139	56	1	8571498	8571998	+	1861	interaction17013	6954	18	0.070445	0	7	0.070445	700	-9.78556	42	1678	-8.44121	1100	-14	-1.17601	NA	NA	NA
13414953	13415453	AT2G31500	NA	2	13413763	13416536	0.755519	0.489526	13414953	13415453	AT2G31480	Yes	2	13408977	13410999	0.871833	1.46912	195	2	13410395	13410895	+	1668	interaction75295	4558	19	0.070445	0	7	0.070445	700	-9.52251	122	1391	-8.44092	1200	-16	-0.641911	NA	-3.53797	0.0515559
26411620	26412120	AT1G70130	Yes	1	26409742	26411801	0.677221	2.59635	26411620	26412120	AT1G70100	NA	1	26403082	26406119	0.812319	0.429385	859	1	26404064	26404564	+	352	interaction50870	7556	10	0.070445	0.029563	2	0.070445	200	-1.33089	652	236	-8.43919	800	-6	-2.67974	NA	0.0917189	0.677583
20430645	20431145	AT1G54740	NA	1	20430768	20431986	0.722055	0.782832	20430645	20431145	AT1G54730	NA	1	20424409	20430123	0.616295	0.371453	399	1	20426005	20426505	+	212	interaction34602	4640	10	0.070445	0.027942	2	0.070445	200	-1.33089	422	242	-8.43683	800	-6	0.366103	0.298927	0.284353	0.0150558
12302156	12302656	AT1G33870	NA	1	12301324	12302467	2.07499	2.49211	12302156	12302656	AT1G33860	Yes	1	12294393	12295305	1.98314	2.30561	1436	1	12294559	12295059	+	451	interaction24121	7597	10	0.070445	0.030122	2	0.070445	200	-1.33089	969	263	-8.42943	800	-6	-0.908908	0.605119	NA	NA
12690331	12690831	AT2G29680	NA	2	12689548	12693024	0.776263	0.44038	12690331	12690831	AT2G29640	NA	2	12671205	12673300	0.68808	0.388442	890	2	12671596	12672096	+	282	interaction73405	18735	10	0.070445	0.028936	2	0.070445	200	-1.33089	669	264	-8.4291	800	-6	-1.01315	1.06e-07	0.331675	0.0982159
24824583	24825083	AT1G66540	Yes	1	24824458	24826670	1.09016	1.69422	24824583	24825083	AT1G66530	NA	1	24818910	24822342	0.757699	0.391728	1923	1	24819960	24820460	+	112	interaction46983	4623	17	0.070445	0	6	0.070445	600	-7.59334	1736	65	-8.42726	1100	-14	-1.91108	2.56e-20	0.096718	0.563829
12454024	12454524	AT1G34190	Yes	1	12451450	12454142	0.866284	0.477113	12454024	12454524	AT1G34180	Yes	1	12448566	12451287	0.797443	1.14907	244	1	12449381	12449881	+	498	interaction24783	4643	10	0.070445	0.028462	2	0.070445	200	-1.33089	277	371	-8.42512	800	-6	0.0268902	0.86422	-0.176816	0.676253
16246964	16247464	AT2G38910	Yes	2	16245213	16247483	1.3654	3.98672	16246964	16247464	AT2G38880	NA	2	16238475	16240834	0.743055	0.536762	722	2	16240021	16240521	+	302	interaction81540	6943	10	0.070445	0.02914	2	0.070445	200	-1.33089	602	277	-8.42512	800	-6	NA	NA	-0.0133836	0.945577
17405482	17405982	AT2G41720	NA	2	17403602	17407135	0.746759	0.348739	17405482	17405982	AT2G41700	NA	2	17382889	17396110	0.780093	0.460022	130	2	17395835	17396335	+	1687	interaction84274	9647	12	0.070445	0.000219	3	0.070445	300	-2.53272	108	1714	-8.42123	900	-8	-0.121124	0.53784	0.132381	0.515806
9829449	9829949	AT1G28135	NA	1	9829260	9829584	0.995972	0.427005	9829449	9829949	AT1G28130	Yes	1	9825285	9828067	0.868213	1.63528	192	1	9827546	9828046	+	122	interaction19212	1903	12	0.070445	0.000214	3	0.070445	300	-2.53262	176	109	-8.41849	900	-8	-1.17601	NA	0.0316818	0.897086
10058493	10058993	AT1G28630	NA	1	10058455	10063460	1.40863	1.17779	10058493	10058993	AT1G28610	Yes	1	10053616	10055731	1.09899	1.30611	131	1	10055377	10055877	+	1225	interaction19784	3116	12	0.070445	0.00022	3	0.070445	300	-2.53262	109	1273	-8.41849	900	-8	2.61209	NA	-1.04223	1.19e-10
16236496	16236996	AT2G38870	NA	2	16236380	16237280	0.722696	0.729477	16236496	16236996	AT2G38840	NA	2	16227050	16232456	0.758521	0.398323	370	2	16228948	16229448	+	952	interaction81483	7548	10	0.070445	0.029691	2	0.070445	200	-1.33089	383	774	-8.40287	800	-6	1.95671	1.65e-16	-0.0236643	0.888066
14260534	14261034	AT2G33710	NA	2	14258508	14260739	2.19436	1.92522	14260534	14261034	AT2G33705	NA	2	14256150	14256360	0.663322	0.423877	337	2	14256034	14256534	+	123	interaction77622	4500	12	0.070445	0.000214	3	0.070445	300	-2.53197	395	116	-8.40071	900	-8	1.4993	1.01e-14	NA	NA
24361857	24362357	AT1G65520	NA	1	24361031	24361993	0.389261	0.389447	24361857	24362357	AT1G65490	NA	1	24354770	24355351	1.54323	2.1193	390	1	24354950	24355450	+	738	interaction44572	6907	10	0.070445	0.029813	2	0.070445	200	-1.33089	403	698	-8.39999	800	-6	0.53833	0.00770001	-1.07073	0.00297782
3824866	3825366	AT1G11362	NA	1	3824509	3825196	0.484994	0.657608	3824866	3825366	AT1G11350	NA	1	3817590	3820805	0.654538	0.409525	832	1	3819911	3820411	+	176	interaction7103	4955	12	0.070445	0.000241	3	0.070445	300	-2.5318	878	118	-8.39603	900	-8	3.2062	5.69e-08	0.185585	0.28518
7912608	7913108	AT2G18180	Yes	2	7911053	7913695	0.806669	2.77516	7912608	7913108	AT2G18140	NA	2	7887583	7888878	3.24071	5.12046	686	2	7888554	7889054	+	1799	interaction64472	24054	10	0.070445	0.0308	2	0.070445	200	-1.33089	530	1669	-8.38685	800	-6	-1.49669	0.0176238	-2.1036	NA
13945988	13946488	AT2G32870	NA	2	13944610	13946790	2.43925	3.71889	13945988	13946488	AT2G32830	Yes	2	13927698	13929713	2.16001	4.86112	637	2	13928500	13929000	+	1896	interaction76977	17488	10	0.070445	0.030708	2	0.070445	200	-1.33089	570	1721	-8.38393	800	-6	0.019197	0.915888	-1.04511	0.124295
24594632	24595132	AT1G66060	Yes	1	24593914	24595544	1.39695	1.21099	24594632	24595132	AT1G66020	NA	1	24577552	24580185	2.3424	3.46805	749	1	24578105	24578605	+	1249	interaction45734	16527	10	0.070445	0.030896	2	0.070445	200	-1.33089	573	1044	-8.38373	800	-6	0.782877	0.0504181	-0.454109	0.394993
24289120	24289620	AT1G65380	NA	1	24286825	24289249	0.7372	0.567172	24289120	24289620	AT1G65360	Yes	1	24281336	24282151	1.71668	1.78243	156	1	24281989	24282489	+	1277	interaction44250	7131	12	0.070445	0.000233	3	0.070445	300	-2.53117	126	1093	-8.37888	900	-8	-0.135814	0.497687	0.747547	NA
6982089	6982589	AT1G20132	Yes	1	6981263	6983627	1.59505	2.40178	6982089	6982589	AT1G20080	Yes	1	6962131	6965045	2.75716	5.82199	1996	1	6962489	6962989	+	909	interaction13249	19600	12	0.08826	0.000301	2	0.070445	200	-1.33089	1594	692	-8.37713	757.776	-8	NA	NA	-1.21018	0.300231
8261512	8262012	AT2G19070	NA	2	8260037	8261985	2.717	3.10802	8261512	8262012	AT2G18990	NA	2	8238690	8240002	0.66246	0.528907	1240	2	8238552	8239052	+	870	interaction65825	22960	10	0.070445	0.03106	2	0.070445	200	-1.33089	1173	801	-8.37281	800	-6	NA	NA	-0.0959537	0.601462
21743425	21743925	AT1G58590	NA	1	21742943	21743891	0.819636	0.346437	21743425	21743925	AT1G58520	NA	1	21729912	21738652	0.632696	0.412236	1922	1	21737047	21737547	+	93	interaction37605	6378	17	0.070445	0	6	0.070445	600	-7.58342	1986	69	-8.37085	1100	-14	-0.321668	0.30451	-2.09505	1.67e-24
11014483	11014983	AT1G30930	NA	1	11014782	11015913	3.37397	5.3959	11014483	11014983	AT1G30920	Yes	1	11004241	11005444	3.63433	5.41802	262	1	11004935	11005435	+	1056	interaction21930	9548	14	0.070445	2e-06	4	0.070445	400	-3.97784	234	887	-8.36838	1000	-10	NA	NA	-1.08045	NA
24801490	24801990	AT1G66475	NA	1	24801610	24801754	1.3835	2.01801	24801490	24801990	AT1G66460	Yes	1	24789734	24791988	0.985783	2.03271	118	1	24791007	24791507	+	2081	interaction46763	10483	12	0.070445	0.000211	3	0.070445	300	-2.53074	132	1590	-8.36745	900	-8	NA	NA	-0.980949	0.0128286
12620072	12620572	AT2G29440	Yes	2	12620059	12621148	1.69882	3.74176	12620072	12620572	AT2G29400	NA	2	12613080	12615399	0.627695	0.426576	1195	2	12615090	12615590	+	217	interaction73025	4982	14	0.070445	2e-06	4	0.070445	400	-3.97767	1376	237	-8.36623	1000	-10	-0.324718	0.378864	0.321096	0.00914424
13732038	13732538	AT2G32340	NA	2	13732246	13734534	0.870715	0.44165	13732038	13732538	AT2G32300	Yes	2	13722426	13723590	0.435281	0.805618	1277	2	13722929	13723429	+	1375	interaction76046	9109	11	0.085415	0.003248	2	0.074243	189.767	-1.33089	1227	1170	-8.36419	717.44	-6	-0.0122344	0.974865	-0.390165	0.106781
7030810	7031310	AT1G20300	NA	1	7029628	7031535	0.594766	0.430547	7030810	7031310	AT1G20290	NA	1	7025547	7029698	0.819809	1.24388	683	1	7026034	7026534	+	169	interaction13525	4776	12	0.070445	0.000238	3	0.070445	300	-2.53036	507	138	-8.35704	900	-8	0.361303	0.0246818	0.747547	NA
23328985	23329485	AT1G62975	NA	1	23328849	23330776	1.2139	1.13083	23328985	23329485	AT1G62950	NA	1	23315293	23318234	0.679121	0.370176	1901	1	23315522	23316022	+	135	interaction41475	13463	12	0.070445	0.000222	3	0.070445	300	-2.5303	1668	139	-8.3554	900	-8	-1.084	1.22e-06	-0.0284681	0.935955
24429803	24430303	AT1G65681	NA	1	24428874	24430670	2.26071	3.56043	24429803	24430303	AT1G65680	NA	1	24427265	24428399	3.11907	4.96488	477	1	24427008	24427508	+	297	interaction44767	2795	14	0.070445	2e-06	4	0.070445	400	-3.97669	411	255	-8.35443	1000	-10	NA	NA	0.068809	0.966392
19272972	19273472	AT1G51880	Yes	1	19270192	19274068	2.21846	4.32775	19272972	19273472	AT1G51850	Yes	1	19252846	19256783	1.93326	2.87204	173	1	19256004	19256504	+	1786	interaction31321	16968	12	0.070445	0.00024	3	0.070445	300	-2.53012	142	1700	-8.35062	900	-8	-0.700479	0.19507	0.78237	1.91e-05
6183422	6183922	AT1G17960	Yes	1	6180895	6183806	1.49882	4.07877	6183422	6183922	AT1G17950	NA	1	6177616	6179289	4.06146	7.41943	74	1	6178032	6178532	+	1991	interaction12073	5390	26	0.070445	0	13	0.070445	1300	-25.2743	42	1537	-8.35037	1300	-26	-2.36075	3.72e-20	-0.36791	0.393325
12313437	12313937	AT1G33900	NA	1	12311517	12313518	1.83889	3.42226	12313437	12313937	AT1G33890	NA	1	12308283	12309686	2.07203	3.31423	891	1	12308066	12308566	+	355	interaction24315	5371	14	0.070445	2e-06	4	0.070445	400	-3.97538	796	284	-8.33864	1000	-10	3.65423	NA	0.196922	0.925243
4853057	4853557	AT1G14190	Yes	1	4852801	4854307	0.770241	0.727288	4853057	4853557	AT1G14180	NA	1	4847161	4849207	0.731279	0.370099	873	1	4848530	4849030	+	158	interaction9943	4527	12	0.070445	0.000234	3	0.070445	300	-2.52963	595	151	-8.33745	900	-8	-0.0529085	0.845361	-0.10821	0.610509
22490652	22491152	AT1G61065	Yes	1	22490243	22491461	0.788581	0.581365	22490652	22491152	AT1G61040	NA	1	22483206	22485969	0.753473	0.421419	814	1	22484476	22484976	+	220	interaction39359	6176	12	0.070445	0.000255	3	0.070445	300	-2.52958	918	152	-8.33609	900	-8	-0.235166	0.418118	0.243893	0.0779783
1132075	1132575	AT2G03720	NA	2	1132169	1133379	1.01254	0.75836	1132075	1132575	AT2G03710	NA	2	1129267	1131838	2.42269	2.64023	926	2	1129104	1129604	+	484	interaction60345	2971	24	0.070445	0	10	0.070445	1000	-16.0974	973	420	-8.32779	1400	-22	-0.577588	0.103489	0.522255	4.88e-05
24276541	24277041	AT1G65350	NA	1	24272517	24277275	2.8447	2.39499	24276541	24277041	AT1G65340	NA	1	24268134	24269646	2.09076	2.40606	1630	1	24269005	24269505	+	188	interaction44052	7536	22	0.070445	0	9	0.070445	900	-13.9237	943	129	-8.32724	1300	-18	-0.508652	0.6685	NA	NA
24652871	24653371	AT1G66190	NA	1	24652794	24653938	1.00208	0.979101	24652871	24653371	AT1G66180	NA	1	24647187	24648813	0.627507	0.33095	1146	1	24647956	24648456	+	193	interaction45916	4915	12	0.070445	0.000247	3	0.070445	300	-2.52876	1047	170	-8.31438	900	-8	-0.329147	0.0994295	0.471094	0.163037
13858806	13859306	AT2G32670	Yes	2	13857876	13859774	1.05906	2.04166	13858806	13859306	AT2G32660	Yes	2	13853757	13856112	0.746479	1.30162	557	2	13854514	13855014	+	267	interaction76594	4292	12	0.070445	0.000265	3	0.070445	300	-2.52849	389	177	-8.30717	900	-8	-0.4321	0.55217	0.932578	0.0214074
27874968	27875468	AT1G74130	Yes	1	27873610	27876033	0.750103	3.73439	27874968	27875468	AT1G74120	Yes	1	27871273	27873260	0.58285	0.529982	201	1	27872542	27873042	+	1591	interaction53907	2426	25	0.070445	0	11	0.070445	1100	-18.736	146	1490	-8.30339	1400	-22	-1.40397	NA	-0.0882866	0.713613
3287	3787	AT2G01010	Yes	2	3705	5513	101.544	78.6211	3287	3787	AT5G10340	Yes	5	3253121	3255045	5.52188	4.23937	736	5	3252961	3253461	+	1057	interaction58854	interchromosomal	14	0.070445	2e-06	4	0.070445	400	-3.97003	532	1819	-8.2748	1000	-10	0.332814	0.673453	0.0341548	NA
3584062	3584562	AT1G10760	NA	1	3581033	3590928	0.691467	0.496139	3584062	3584562	AT1G10750	NA	1	3574806	3578474	0.726272	1.38419	101	1	3577921	3578421	+	646	interaction6782	6141	17	0.070445	0	6	0.070445	600	-7.56493	78	763	-8.26792	1100	-14	-0.24935	0.237023	-0.0528325	0.876388
11930660	11931160	AT2G28010	Yes	2	11930578	11931769	2.85775	6.16892	11930660	11931160	AT2G28000	NA	2	11926448	11929389	0.678704	0.50744	1101	2	11927997	11928497	+	190	interaction71289	2663	22	0.070445	0	9	0.070445	900	-13.901	754	143	-8.26315	1300	-18	NA	NA	-0.0599264	0.806897
24809534	24810034	AT1G66490	Yes	1	24809420	24810549	4.53334	9.12238	24809534	24810034	AT1G66460	Yes	1	24789734	24791988	0.985783	2.03271	1701	1	24791466	24791966	+	872	interaction46841	18068	14	0.072154	2e-06	4	0.070445	400	-3.96899	1301	641	-8.26253	966.83	-10	NA	NA	-0.980949	0.0128286
711891	712391	AT2G02610	NA	2	710711	712819	3.09349	5.29832	711891	712391	AT2G02580	NA	2	701945	703770	0.897028	0.638328	875	2	702534	703034	+	1189	interaction59698	9357	14	0.070445	2e-06	4	0.070445	400	-3.96867	685	982	-8.2587	1000	-10	-0.380087	0.483045	0.443902	0.740124
9743027	9743527	AT1G27960	NA	1	9742187	9745787	0.753394	0.445965	9743027	9743527	AT1G27950	NA	1	9740703	9742159	1.14173	1.25869	69	1	9740505	9741005	+	1228	interaction18847	2522	21	0.070445	0	9	0.070445	900	-14.2598	54	1093	-8.254	1200	-18	0.350621	0.141879	-0.0597614	0.752884
15068438	15068938	AT2G35890	Yes	2	15067174	15069136	0.692819	0.709619	15068438	15068938	AT2G35840	NA	2	15053622	15057426	0.718378	0.439398	1656	2	15054010	15054510	+	701	interaction79565	14428	14	0.070445	2e-06	4	0.070445	400	-3.96806	1353	785	-8.2516	1000	-10	-0.59657	0.354784	-0.663081	2.12e-09
9895636	9896136	AT2G23240	Yes	2	9895854	9896325	2.13204	4.71818	9895636	9896136	AT2G23230	Yes	2	9892715	9895400	2.19702	3.57868	809	2	9892506	9893006	+	119	interaction68024	3130	30	0.070445	0	15	0.070445	1500	-29.7932	743	101	-8.2399	1500	-30	-0.882732	NA	NA	NA
23387455	23387955	AT1G63080	NA	1	23387630	23390816	0.849353	0.776877	23387455	23387955	AT1G63060	NA	1	23384042	23385042	2.66097	2.68134	194	1	23384553	23385053	+	1534	interaction41720	2902	25	0.070445	0	11	0.070445	1100	-18.7054	161	1266	-8.23897	1400	-22	0.337354	0.133581	NA	NA
11257595	11258095	AT1G31440	NA	1	11255835	11258715	0.679177	0.369087	11257595	11258095	AT1G31420	NA	1	11249599	11253915	0.698026	0.436294	373	1	11250077	11250577	+	1827	interaction22402	7518	12	0.070445	0.00028	3	0.070445	300	-2.52578	302	1658	-8.2357	900	-8	-0.481088	0.000446313	0.066311	0.713206
20451861	20452361	AT1G54830	NA	1	20451082	20452671	0.732841	0.334635	20451861	20452361	AT1G54820	NA	1	20447315	20450861	0.79966	0.494965	924	1	20450049	20450549	+	219	interaction34788	1812	19	0.070445	0	7	0.070445	700	-9.47279	853	197	-8.23343	1200	-16	-0.0315596	0.874605	-1.25072	3.36e-11
7988965	7989465	AT1G22600	NA	1	7987140	7989217	1.37047	1.52754	7988965	7989465	AT1G22570	NA	1	7976619	7978573	1.24867	1.13229	1178	1	7977501	7978001	+	1929	interaction15861	11464	12	0.11054	0.000305	4	0.130439	216.023	-3.96629	1376	1833	-8.2308	548.712	-8	-0.750174	0.378153	0.512009	0.0842839
17604553	17605053	AT1G47810	NA	1	17603503	17604559	3.02426	5.121	17604553	17605053	AT1G47770	Yes	1	17590265	17591261	1.15215	1.00419	414	1	17590534	17591034	+	1773	interaction27818	14019	12	0.070445	0.000284	3	0.070445	300	-2.52555	321	1212	-8.2298	900	-8	NA	NA	0.291133	NA
7920027	7920527	AT2G18196	NA	2	7920507	7922326	2.10573	2.33982	7920027	7920527	AT2G18180	Yes	2	7911053	7913695	0.806669	2.77516	251	2	7913490	7913990	+	1944	interaction64649	6537	19	0.070445	0	7	0.070445	700	-9.47158	200	1517	-8.22854	1200	-16	0.486898	0.0105358	-1.49669	0.0176238
1070007	1070507	AT2G03520	NA	2	1069490	1071382	0.691031	0.64741	1070007	1070507	AT2G03505	Yes	2	1064235	1065372	0.824789	3.11773	130	2	1064873	1065373	+	1118	interaction60174	5134	17	0.070445	0	6	0.070445	600	-7.55645	83	941	-8.22158	1100	-12	-1.8543	0.171582	-0.0398169	0.945329
18920984	18921484	AT1G51040	Yes	1	18920657	18923314	1.60993	3.4402	18920984	18921484	AT1G51000	NA	1	18909923	18910142	4.65644	6.90399	1640	1	18909590	18910090	+	437	interaction29898	11394	12	0.070445	0.000285	3	0.070445	300	-2.52502	1404	377	-8.2159	900	-8	-1.37949	NA	NA	NA
21950595	21951095	AT1G59725	Yes	1	21950737	21952210	1.76275	5.72583	21950595	21951095	AT1G59720	NA	1	21939751	21941784	0.630463	0.584227	544	1	21940543	21941043	+	953	interaction38056	10052	12	0.070445	0.000292	3	0.070445	300	-2.52447	459	852	-8.20175	900	-8	-0.962455	0.276429	-0.589395	0.000196955
18202057	18202557	AT1G49210	Yes	1	18201888	18202764	1.10414	1.40534	18202057	18202557	AT1G49190	NA	1	18191266	18193782	5.6925	8.81663	1641	1	18192101	18192601	+	673	interaction28731	9956	12	0.070445	0.000296	3	0.070445	300	-2.52434	1469	484	-8.1984	900	-8	1.1899	0.00222341	NA	NA
12158054	12158554	AT1G33520	Yes	1	12157155	12158953	0.69961	0.477204	12158054	12158554	AT1G33480	NA	1	12148601	12150263	0.650793	0.431271	1624	1	12148876	12149376	+	60	interaction23757	9178	13	0.070445	9e-06	4	0.070445	400	-4.07449	1584	31	-8.19629	900	-8	0.164698	0.17175	-0.608334	0.00269004
12595511	12596011	AT1G34460	Yes	1	12595109	12599628	2.75944	6.80063	12595511	12596011	AT1G34430	NA	1	12587751	12590192	0.751157	0.393889	583	1	12589469	12589969	+	1214	interaction24880	6042	12	0.070445	0.000293	3	0.070445	300	-2.52423	508	1099	-8.1955	900	-8	-2.45504	2.45e-14	0.0116839	0.962525
531995	532495	AT1G02530	Yes	1	529794	534677	0.654829	0.920338	531995	532495	AT1G02520	Yes	1	523650	528745	0.63961	0.907521	119	1	523948	524448	+	1720	interaction1073	8047	20	0.070445	0	8	0.070445	800	-11.77	79	1552	-8.1952	1200	-16	0.306765	0.721871	1.06908	0.00061471
10035471	10035971	AT2G23590	NA	2	10034606	10036000	1.39559	1.40507	10035471	10035971	AT2G23530	Yes	2	10020651	10022864	0.90936	1.8924	1626	2	10021576	10022076	+	793	interaction68166	13895	12	0.070445	0.000299	3	0.070445	300	-2.52395	1478	580	-8.18824	900	-8	0.820018	0.0558122	-0.750483	0.0224505
19278443	19278943	AT1G51890	Yes	1	19274657	19278528	1.31249	2.85537	19278443	19278943	AT1G51880	Yes	1	19270192	19274068	2.21846	4.32775	831	1	19273495	19273995	+	245	interaction31356	4948	22	0.070445	0	9	0.070445	900	-13.8733	792	165	-8.18625	1300	-18	1.08672	0.000422622	-0.700479	0.19507
30047513	30048013	AT1G79880	NA	1	30046027	30048378	0.722577	0.425824	30047513	30048013	AT1G79860	Yes	1	30042091	30044175	3.03507	6.00455	79	1	30043636	30044136	+	1645	interaction58428	3877	20	0.070445	0	8	0.070445	800	-11.7628	81	1213	-8.17057	1200	-16	-0.0260957	0.915578	-0.0100846	0.989331
5872512	5873012	AT1G17180	Yes	1	5872144	5873086	0.712313	0.858279	5872512	5873012	AT1G17150	NA	1	5865706	5867495	1.17321	1.08761	802	1	5866998	5867498	+	112	interaction11777	5514	17	0.070445	0	6	0.070445	600	-7.54357	719	92	-8.15226	1100	-14	1.30232	3.3e-07	1.73974	NA
14017508	14018008	AT1G36970	NA	1	14016384	14018356	0.555328	0.338956	14017508	14018008	AT1G36960	NA	1	14014795	14015508	0.694246	0.343929	32	1	14014924	14015424	+	241	interaction26016	2584	7	0.070445	1	1	0.070445	100	-0.441278	17	99	-8.14153	600	-2	NA	NA	NA	NA
16244389	16244889	AT2G38905	Yes	2	16244098	16244503	1.88115	2.87585	16244389	16244889	AT2G38890	Yes	2	16241188	16242917	1.03722	2.09571	1453	2	16241109	16241609	+	138	interaction81521	3280	26	0.070445	0	12	0.070445	1200	-21.4185	1297	113	-8.13567	1400	-24	-1.04433	NA	0.308212	NA
12370467	12370967	AT1G34030	NA	1	12370064	12371553	0.753134	0.525208	12370467	12370967	AT1G34020	NA	1	12366853	12369178	0.765561	0.445791	680	1	12368535	12369035	+	108	interaction24632	1932	25	0.070445	0	12	0.070445	1200	-22.1021	596	51	-8.13526	1300	-24	0.0107584	0.955701	-0.0788206	0.593249
6057418	6057918	AT1G17610	NA	1	6056894	6058357	0.565924	0.654453	6057418	6057918	AT1G17600	NA	1	6052935	6056664	0.635544	0.495943	768	1	6052986	6053486	+	346	interaction12008	4432	19	0.070445	0	7	0.070445	700	-9.44199	547	321	-8.11013	1200	-16	-0.541602	0.223328	-0.67525	0.0723581
26725608	26726108	AT1G70890	NA	1	26725625	26726544	3.36749	4.13765	26725608	26726108	AT1G70870	Yes	1	26721019	26721563	1.27349	3.12257	1988	1	26720991	26721491	+	251	interaction51630	4617	22	0.070445	0	9	0.070445	900	-13.845	1780	196	-8.10921	1300	-18	-0.0495901	0.869636	-1.17601	NA
10404093	10404593	AT2G24510	NA	2	10404372	10405650	3.68998	6.59457	10404093	10404593	AT2G24490	Yes	2	10397376	10400498	0.578825	0.729917	172	2	10399984	10400484	+	1753	interaction68907	4109	17	0.070445	0	6	0.070445	600	-7.53521	99	1512	-8.10795	1100	-12	NA	NA	-0.386583	0.0564084
16755423	16755923	AT2G40120	NA	2	16754938	16757592	0.674331	0.562511	16755423	16755923	AT2G40116	Yes	2	16751713	16754535	0.534552	3.0615	1076	2	16751997	16752497	+	136	interaction82326	3426	42	0.070445	0	25	0.070445	2500	-62.2635	820	93	-8.09242	1700	-48	-0.169099	0.450155	-3.09767	NA
17989546	17990046	AT1G48650	NA	1	17989397	17995326	0.864363	0.484797	17989546	17990046	AT1G48640	NA	1	17986357	17988991	0.910649	0.482857	113	1	17986518	17987018	+	1603	interaction28271	3028	32	0.070445	0	17	0.070445	1700	-35.9986	84	1492	-8.08662	1500	-34	-0.0942508	0.524351	0.422221	0.522607
20764041	20764541	AT1G55580	NA	1	20764010	20765752	5.88495	9.40428	20764041	20764541	AT1G55560	Yes	1	20754320	20756656	1.98587	3.0068	126	1	20756095	20756595	+	1845	interaction35308	7946	17	0.070445	0	6	0.070445	600	-7.53096	103	1581	-8.08559	1100	-12	-0.411227	0.475444	NA	NA
1733548	1734048	AT2G04930	NA	2	1733637	1734471	2.98845	5.46294	1733548	1734048	AT2G04920	NA	2	1726137	1727268	1.15126	0.909708	110	2	1726029	1726529	+	1800	interaction61181	7519	25	0.070445	0	12	0.070445	1200	-21.8899	61	1440	-8.0725	1300	-24	NA	NA	NA	NA
26151492	26151992	AT1G69550	NA	1	26148020	26153555	0.825659	0.466001	26151492	26151992	AT1G69540	Yes	1	26145043	26147571	0.768807	1.63922	262	1	26146663	26147163	+	1037	interaction50005	4829	22	0.070445	0	9	0.070445	900	-13.8228	230	961	-8.04998	1300	-18	-0.493016	0.000683515	-1.80369	0.00186588
14695935	14696435	AT2G34830	NA	2	14693755	14696378	4.7167	7.65658	14695935	14696435	AT2G34820	NA	2	14689623	14690879	4.17975	5.9871	254	2	14690017	14690517	+	813	interaction78677	5918	22	0.070445	0	9	0.070445	900	-13.8086	259	723	-8.01238	1300	-18	0.156736	0.591889	0.747547	NA
609866	610366	AT2G02310	Yes	2	608758	610130	2.13698	2.7581	609866	610366	AT2G02290	Yes	2	604452	605361	1.16491	1.86285	51	2	604404	604904	+	1361	interaction59582	5462	14	0.070445	0	5	0.070445	500	-5.89778	24	1112	-8.00905	900	-10	0.404002	0.703959	-1.17601	NA
12294450	12294950	AT1G33860	Yes	1	12294393	12295305	1.98314	2.30561	12294450	12294950	AT1G33850	NA	1	12287912	12288210	2.46692	2.08814	451	1	12287955	12288455	+	1174	interaction24105	6495	22	0.070445	0	9	0.070445	900	-13.8069	263	1097	-8.00788	1300	-18	NA	NA	NA	NA
5254061	5254561	AT1G15280	NA	1	5252314	5256753	0.69251	0.416874	5254061	5254561	AT1G15215	NA	1	5238064	5240051	0.692467	0.416743	55	1	5238915	5239415	+	1974	interaction10721	15146	7	0.070445	1	1	0.070445	100	-0.444636	21	1468	-7.98651	600	-2	-0.0425058	0.789049	0.0110073	0.968606
16443897	16444397	AT1G43650	NA	1	16443684	16446886	1.20591	0.835773	16443897	16444397	AT1G43630	NA	1	16436370	16437755	1.43422	0.789757	43	1	16436865	16437365	+	591	interaction26136	7032	7	0.070445	1	1	0.070445	100	-0.445282	22	422	-7.95778	600	-2	0.920096	0.00463612	NA	NA
8943109	8943609	AT1G25460	NA	1	8942810	8944244	0.78967	0.714392	8943109	8943609	AT1G25450	Yes	1	8938478	8940387	2.02455	4.35798	1822	1	8939075	8939575	+	263	interaction17695	4034	51	0.070445	0	31	0.070445	3100	-81.2831	1583	207	-7.95404	2000	-62	0.266264	0.576551	0.379769	0.0298184
22718529	22719029	AT1G61570	Yes	1	22718704	22719516	0.700706	1.60879	22718529	22719029	AT1G61563	NA	1	22714920	22715448	3.47576	4.94087	272	1	22714628	22715128	+	1097	interaction40141	3901	32	0.070445	0	16	0.070445	1600	-32.0329	256	902	-7.94703	1600	-32	-0.336531	0.041364	-1.17601	NA
9590625	9591125	AT1G27580	Yes	1	9589932	9591075	1.57967	5.58951	9590625	9591125	AT1G27570	NA	1	9575537	9582376	0.691909	0.444821	677	1	9582000	9582500	+	47	interaction18666	8625	7	0.070445	1	1	0.070445	100	-0.445871	711	23	-7.93186	600	-2	-0.807087	NA	NA	NA
6801632	6802132	AT2G15590	NA	2	6801942	6802618	2.68331	2.94827	6801632	6802132	AT2G15535	NA	2	6778194	6778853	0.73583	0.495781	506	2	6779962	6780462	+	49	interaction62700	21670	7	0.070445	1	1	0.070445	100	-0.445871	472	23	-7.93186	600	-2	0.206296	NA	NA	NA
536006	536506	AT1G02550	Yes	1	536482	537211	1.88849	6.07209	536006	536506	AT1G02520	Yes	1	523650	528745	0.63961	0.907521	82	1	523949	524449	+	1720	interaction1091	12057	15	0.070445	0	5	0.070445	500	-5.71025	65	1552	-7.92777	1000	-10	NA	NA	1.06908	0.00061471
20346537	20347037	AT1G54470	NA	1	20344697	20349202	1.61956	1.5691	20346537	20347037	AT1G54450	NA	1	20336339	20339535	1.1614	0.918201	115	1	20339499	20339999	+	730	interaction34164	7038	15	0.070445	0	5	0.070445	500	-5.70869	66	716	-7.91643	1000	-10	0.738228	0.519998	0.233263	0.310727
10209960	10210460	AT1G29200	NA	1	10207821	10210622	0.844168	0.718626	10209960	10210460	AT1G29195	Yes	1	10202535	10203396	3.80375	4.35364	104	1	10203378	10203878	+	1019	interaction20421	6582	15	0.070445	0	5	0.070445	500	-5.70717	67	975	-7.90547	1000	-10	-0.670808	0.0886176	0.188176	0.702922
12235440	12235940	AT1G33750	NA	1	12233768	12236476	4.27925	6.23922	12235440	12235940	AT1G33720	NA	1	12220896	12224000	1.80335	2.34786	105	1	12223041	12223541	+	1472	interaction23886	12399	15	0.070445	0	5	0.070445	500	-5.70717	67	1049	-7.90547	1000	-10	0.323966	0.350562	0.345648	0.0558122
22488660	22489160	AT1G61060	Yes	1	22488547	22489711	1.11592	1.55062	22488660	22489160	AT1G61040	NA	1	22483206	22485969	0.753473	0.421419	1902	1	22483951	22484451	+	167	interaction39340	4709	23	0.070445	0	10	0.070445	1000	-16.3153	1482	123	-7.9029	1300	-20	3.3585	NA	0.243893	0.0779783
24730018	24730518	AT1G66330	NA	1	24729628	24732491	0.829204	0.518244	24730018	24730518	AT1G66320	NA	1	24726811	24728614	4.6813	5.59794	222	1	24727628	24728128	+	854	interaction46479	2390	17	0.070445	0	6	0.070445	600	-7.49259	163	529	-7.88971	1100	-12	-0.794643	1.47e-14	1.01719	NA
6258413	6258913	AT1G18190	NA	1	6257850	6261457	0.786549	0.439917	6258413	6258913	AT1G18150	NA	1	6244297	6247812	0.829617	0.403894	35	1	6246903	6247403	+	1668	interaction12234	11510	7	0.070445	1	1	0.070445	100	-0.446907	25	1824	-7.88698	600	-2	-0.0758853	0.6065	-0.566818	3.24e-05
9287500	9288000	AT1G26810	NA	1	9286642	9289969	0.740241	0.419332	9287500	9288000	AT1G26790	Yes	1	9273856	9275312	1.23076	1.90722	44	1	9274091	9274591	+	1167	interaction18337	13409	7	0.070445	1	1	0.070445	100	-0.446907	25	994	-7.88698	600	-2	-0.149046	0.442511	-2.75884	NA
14204529	14205029	AT2G33540	NA	2	14203504	14208797	0.684731	0.356861	14204529	14205029	AT2G33530	Yes	2	14197645	14200560	0.78587	3.0112	198	2	14199967	14200467	+	1667	interaction77567	4562	23	0.070445	0	10	0.070445	1000	-16.2961	131	1803	-7.85943	1300	-20	-0.103511	0.570692	-1.35185	7.19e-24
1835011	1835511	AT1G06070	NA	1	1834828	1837648	0.654082	0.366869	1835011	1835511	AT1G06030	Yes	1	1826879	1828161	0.722478	0.804897	99	1	1827414	1827914	+	1949	interaction4150	7597	15	0.070445	0	5	0.070445	500	-5.70024	72	1733	-7.85579	1000	-10	0.198964	0.109243	0.564243	0.665658
10310502	10311002	AT1G29470	NA	1	10310244	10314048	0.751278	0.422524	10310502	10311002	AT1G29430	NA	1	10302649	10303335	0.668439	0.466954	104	1	10303088	10303588	+	1737	interaction20656	7414	18	0.070445	0	7	0.070445	700	-9.64875	63	1645	-7.84849	1100	-14	0.172652	0.402313	0.866484	1.79e-07
5140925	5141425	AT1G14910	NA	1	5139711	5143689	0.643176	0.37989	5140925	5141425	AT1G14890	Yes	1	5137013	5137957	1.64669	1.77413	69	1	5136984	5137484	+	1786	interaction10613	3941	20	0.070445	0	9	0.070445	900	-14.6961	32	1683	-7.82574	1100	-18	0.485121	2.83e-05	0.568474	0.00316329
21395960	21396460	AT1G57770	NA	1	21395195	21398280	0.82513	0.830778	21395960	21396460	AT1G57750	Yes	1	21383980	21385709	2.31434	4.5	1134	1	21384985	21385485	+	1532	interaction36742	10975	26	0.084511	0	9	0.070445	900	-13.7283	927	1167	-7.80643	1267.25	-24	-0.457451	0.0471768	-0.214224	NA
20274953	20275453	AT1G54310	NA	1	20273566	20275574	0.70595	0.409396	20274953	20275453	AT1G54300	Yes	1	20270809	20272106	2.25765	3.18615	130	1	20271453	20271953	+	615	interaction33991	3500	15	0.070445	0	5	0.070445	500	-5.69313	78	491	-7.80553	1000	-10	0.141034	0.34858	-1.17601	NA
4130888	4131388	AT1G12180	NA	1	4130420	4131137	4.14059	6.61676	4130888	4131388	AT1G12160	NA	1	4126065	4128310	2.28891	2.04924	1203	1	4126990	4127490	+	1017	interaction8084	3898	22	0.070445	0	9	0.070445	900	-13.7267	1183	977	-7.80249	1300	-18	0.747547	NA	0.132864	0.560209
17785362	17785862	AT1G48150	NA	1	17785396	17786368	0.561508	0.869547	17785362	17785862	AT1G48130	NA	1	17780501	17781727	4.70201	8.29551	963	1	17781493	17781993	+	78	interaction28052	3869	13	0.070445	1.2e-05	4	0.070445	400	-4.04229	734	43	-7.80103	900	-8	0.747547	NA	-1.77409	0.125122
15418974	15419474	AT2G36780	NA	2	15417489	15419154	1.30985	1.41649	15418974	15419474	AT2G36760	Yes	2	15413041	15414594	1.34561	0.679122	1182	2	15413415	15413915	+	842	interaction80408	5559	25	0.070445	0	11	0.070445	1100	-18.4818	1334	693	-7.79729	1400	-22	1.04886	0.0100519	-1.19904	0.316509
27994459	27994959	AT1G74490	Yes	1	27994699	27996742	0.677887	3.983	27994459	27994959	AT1G74460	Yes	1	27987960	27989801	0.889529	1.42189	289	1	27988522	27989022	+	1687	interaction54291	5937	17	0.070445	0	6	0.070445	600	-7.47308	233	1702	-7.79383	1100	-12	-0.888234	0.0107655	-0.988059	4.83e-09
14790002	14790502	AT2G35080	Yes	2	14789244	14791448	1.9505	2.004	14790002	14790502	AT2G35075	Yes	2	14786681	14789023	0.783201	0.553873	188	2	14787051	14787551	+	1348	interaction78950	2951	59	0.070445	0	39	0.070445	3900	-113.196	140	1030	-7.7925	2000	-76	0.747547	NA	-0.244059	0.477637
20338878	20339378	AT1G54450	NA	1	20336339	20339535	1.1614	0.918201	20338878	20339378	AT1G54440	NA	1	20323035	20328067	0.750133	0.423292	1212	1	20325063	20325563	+	38	interaction34123	13815	7	0.070445	1	1	0.070445	100	-0.449205	1159	31	-7.79028	600	-2	0.233263	0.310727	-0.177819	0.270473
4448035	4448535	AT1G13040	NA	1	4447646	4449200	0.62978	0.403305	4448035	4448535	AT1G13030	NA	1	4444042	4447406	0.65281	0.413409	2059	1	4444562	4445062	+	219	interaction8830	3473	34	0.070445	0	18	0.070445	1800	-38.2547	1540	156	-7.78655	1600	-36	0.393369	0.029208	0.242892	0.141487
15124592	15125092	AT2G36020	NA	2	15123153	15125588	1.46469	1.02666	15124592	15125092	AT2G36010	NA	2	15119541	15123184	0.753115	0.441973	1250	2	15121964	15122464	+	230	interaction79825	2628	42	0.070445	0	24	0.070445	2400	-57.0896	1270	197	-7.78579	1800	-48	4.21016	NA	-0.0162458	0.954807
6368978	6369478	AT2G14835	NA	2	6366887	6371034	0.782883	0.470476	6368978	6369478	AT2G14810	Yes	2	6357464	6358470	0.863194	1.25618	37	2	6358362	6358862	+	1218	interaction62379	10616	9	0.070445	0.139193	2	0.070445	200	-1.3312	20	1072	-7.7857	700	-4	0.141753	0.27795	NA	NA
12981023	12981523	AT1G35350	Yes	1	12981250	12984583	0.992242	1.22859	12981023	12981523	AT1G35340	NA	1	12977667	12979910	0.705583	0.422736	189	1	12978448	12978948	+	2036	interaction25632	2575	34	0.070445	0	18	0.070445	1800	-38.2486	157	1792	-7.78033	1600	-36	0.940914	0.00327694	-0.0767727	0.577138
3157406	3157906	AT1G09750	NA	1	3157500	3159148	0.748317	0.497979	3157406	3157906	AT1G09720	NA	1	3144437	3147303	0.54692	0.370614	1067	1	3146037	3146537	+	65	interaction5956	11369	7	0.070445	1	1	0.070445	100	-0.449504	1157	32	-7.77799	600	-2	0.00594182	0.986343	0.747547	NA
27196102	27196602	AT1G72250	NA	1	27192844	27198314	0.57629	0.420532	27196102	27196602	AT1G72220	Yes	1	27184280	27185830	1.37825	4.21322	58	1	27184678	27185178	+	1474	interaction52880	11424	7	0.070445	1	1	0.070445	100	-0.449504	32	1189	-7.77799	600	-2	-0.283959	0.199578	-1.44425	0.000426863
4159945	4160445	AT1G12250	NA	1	4159264	4161455	0.859325	0.50138	4159945	4160445	AT1G12230	NA	1	4147961	4151056	0.728732	0.416919	1907	1	4149964	4150464	+	97	interaction8274	9981	15	0.070445	0	5	0.070445	500	-5.68898	1719	82	-7.77653	1000	-10	-0.181778	0.299586	0.212145	0.092485
11041947	11042447	AT2G25900	NA	2	11041330	11043209	0.472912	0.437207	11041947	11042447	AT2G25890	NA	2	11037379	11038126	4.9414	8.29185	753	2	11037420	11037920	+	84	interaction69825	4527	18	0.070445	0	7	0.070445	700	-9.62918	726	68	-7.77096	1100	-14	-0.221754	0.410137	-3.66933	0.00588508
17001981	17002481	AT1G44970	NA	1	17002116	17003688	0.68187	0.698104	17001981	17002481	AT1G44960	NA	1	16999537	17001729	0.646201	0.404514	984	1	17000447	17000947	+	326	interaction26458	1534	17	0.070445	0	6	0.070445	600	-7.46777	655	264	-7.76819	1100	-12	-0.457932	0.0915005	0.130041	0.451407
684379	684879	AT2G02540	NA	2	683646	685309	2.77416	3.19915	684379	684879	AT2G02500	NA	2	670877	673155	0.805159	0.554283	718	2	671857	672357	+	54	interaction59645	12522	7	0.070445	1	1	0.070445	100	-0.449784	636	33	-7.76652	600	-2	0.0134104	0.973708	-0.220959	0.105992
18591855	18592355	AT2G45080	Yes	2	18591664	18592455	0.790964	2.41185	18591855	18592355	AT2G45070	NA	2	18587016	18588377	0.571682	0.367236	1233	2	18587990	18588490	+	34	interaction86714	3865	7	0.070445	1	1	0.070445	100	-0.449784	1151	33	-7.76652	600	-2	0.0829634	0.916974	-0.00919425	0.96415
23012482	23012982	AT1G62290	Yes	1	23009910	23013529	1.11082	2.30465	23012482	23012982	AT1G62270	Yes	1	23004498	23005650	3.77671	6.60878	1018	1	23004501	23005001	+	195	interaction40884	7981	20	0.070445	0	8	0.070445	800	-11.6368	972	147	-7.76552	1200	-16	-0.1021	0.655378	NA	NA
20057927	20058427	AT1G53720	NA	1	20056532	20059638	0.749306	0.400505	20057927	20058427	AT1G53710	NA	1	20053160	20056396	0.629733	0.429644	93	1	20055937	20056437	+	1642	interaction33507	1990	15	0.070445	0	5	0.070445	500	-5.68706	84	1692	-7.76318	1000	-10	0.055637	0.776026	0.124279	0.411614
172439	172939	AT2G01390	NA	2	172255	174137	0.541684	0.428492	172439	172939	AT2G01370	NA	2	168630	169642	0.69459	0.991599	159	2	168572	169072	+	2072	interaction59100	3867	27	0.070445	0	13	0.070445	1300	-24.0656	118	1613	-7.76225	1400	-26	0.483593	0.022843	-0.89399	NA
18165507	18166007	AT2G43865	NA	2	18165418	18165878	0.741032	0.599161	18165507	18166007	AT2G43850	Yes	2	18159181	18162044	0.620959	0.435766	98	2	18161517	18162017	+	1479	interaction86090	3990	21	0.070445	0	9	0.070445	900	-14.0837	77	1638	-7.75503	1200	-18	-1.17601	NA	0.0780325	0.687585
25832018	25832518	AT1G68780	NA	1	25831802	25833844	0.695649	0.730167	25832018	25832518	AT1G68750	Yes	1	25822941	25828107	2.16481	2.97483	325	1	25827997	25828497	+	1598	interaction49510	4021	17	0.070445	0	6	0.070445	600	-7.46243	305	1707	-7.74252	1100	-12	-0.391623	0.0922518	0.759198	NA
11930939	11931439	AT2G28010	Yes	2	11930578	11931769	2.85775	6.16892	11930939	11931439	AT2G27990	NA	2	11921432	11924698	2.43373	3.48325	2003	2	11923459	11923959	+	100	interaction71300	7480	15	0.070445	0	5	0.070445	500	-5.68349	1676	88	-7.73846	1000	-10	NA	NA	-0.625256	0.0660104
1883006	1883506	AT1G06160	Yes	1	1883003	1883934	1.12721	3.57005	1883006	1883506	AT1G06148	NA	1	1874884	1877528	0.704466	0.548078	1190	1	1874632	1875132	+	40	interaction4173	8374	7	0.070445	1	1	0.070445	100	-0.450531	1113	36	-7.73621	600	-2	0.233026	0.845204	-0.471163	0.513246
30207108	30207608	AT1G80350	NA	1	30205314	30208226	0.792862	0.612535	30207108	30207608	AT1G80300	NA	1	30191855	30194519	0.617433	0.430104	1248	1	30193906	30194406	+	55	interaction58535	13202	7	0.070445	1	1	0.070445	100	-0.450531	1108	36	-7.73621	600	-2	9.72e-05	0.999728	0.00905913	0.957389
29308357	29308857	AT1G77950	NA	1	29306956	29311194	1.23677	1.43724	29308357	29308857	AT1G77930	Yes	1	29300999	29303570	1.57969	0.915901	35	1	29301534	29302034	+	1836	interaction56700	6823	9	0.070445	0.131907	2	0.070445	200	-1.33117	21	1683	-7.72875	700	-4	-1.17601	NA	-0.606752	5.93e-08
5988019	5988519	AT1G17450	NA	1	5988279	5996785	0.668597	0.431265	5988019	5988519	AT1G17420	Yes	1	5977410	5981480	1.11287	1.59474	41	1	5977530	5978030	+	2076	interaction11975	10489	7	0.070445	1	1	0.070445	100	-0.450752	37	1950	-7.72728	600	-2	-0.0289186	0.90643	-0.24906	0.873107
9131150	9131650	AT1G26390	Yes	1	9130016	9131779	2.23707	4.01143	9131150	9131650	AT1G26370	NA	1	9121491	9125557	0.707769	0.372816	540	1	9122926	9123426	+	69	interaction17923	8224	7	0.070445	1	1	0.070445	100	-0.450962	446	38	-7.71885	600	-2	3.04146	1.66e-19	-0.0644918	0.744582
9588401	9588901	AT2G22560	NA	2	9585882	9588838	0.739618	0.378605	9588401	9588901	AT2G22530	NA	2	9572795	9577441	0.695646	0.542306	66	2	9577075	9577575	+	1058	interaction67585	11326	7	0.070445	1	1	0.070445	100	-0.450962	38	1022	-7.71885	600	-2	-0.0231841	0.939487	0.00466552	0.983615
22005008	22005508	AT1G59800	NA	1	22004963	22006172	2.8746	3.66935	22005008	22005508	AT1G59790	NA	1	22001503	22003385	3.83103	5.68445	595	1	22001099	22001599	+	585	interaction38240	3909	17	0.070445	0	6	0.070445	600	-7.45702	408	362	-7.71675	1100	-12	0.747547	NA	3.29876	0.032742
18479026	18479526	AT1G49910	NA	1	18479024	18481475	0.715863	0.452328	18479026	18479526	AT1G49850	NA	1	18455063	18456544	0.699734	0.421539	1766	1	18455593	18456093	+	47	interaction29219	23433	7	0.070445	1	1	0.070445	100	-0.451161	1754	39	-7.71089	600	-2	-0.382057	0.176903	0.216667	0.139761
3545393	3545893	AT1G10682	NA	1	3544990	3545471	1.58339	2.45607	3545393	3545893	AT1G10680	Yes	1	3538469	3543782	0.928504	2.83433	720	1	3541041	3541541	+	84	interaction6669	4352	13	0.070445	1.3e-05	4	0.070445	400	-4.03381	786	48	-7.70406	900	-8	-0.370722	0.0213292	-0.736347	0.568266
2842371	2842871	AT1G08860	Yes	1	2842152	2846138	1.57671	2.16956	2842371	2842871	AT1G08840	NA	1	2829104	2838469	0.714547	0.482555	887	1	2836959	2837459	+	68	interaction5307	5412	7	0.070445	1	1	0.070445	100	-0.451351	718	40	-7.70335	600	-2	0.656761	0.622906	-0.468795	0.00851016
3715605	3716105	AT1G11120	NA	1	3715183	3717320	0.629905	0.430235	3715605	3716105	AT1G11100	NA	1	3703671	3709302	0.655283	0.425853	40	1	3708474	3708974	+	1139	interaction7052	7131	7	0.070445	1	1	0.070445	100	-0.451351	40	976	-7.70335	600	-2	0.382317	0.257968	0.726359	0.000314654
4177538	4178038	AT1G12280	NA	1	4174874	4177559	0.546773	0.415853	4177538	4178038	AT1G12250	NA	1	4159264	4161455	0.859325	0.50138	49	1	4159970	4160470	+	1907	interaction8369	17568	7	0.070445	1	1	0.070445	100	-0.451351	40	1719	-7.70335	600	-2	-0.375135	0.0338797	-0.181778	0.299586
17603538	17604038	AT1G47810	NA	1	17603503	17604559	3.02426	5.121	17603538	17604038	AT1G47765	NA	1	17574905	17576092	0.686765	0.477308	1422	1	17574929	17575429	+	70	interaction27758	28609	7	0.070445	1	1	0.070445	100	-0.451351	1289	40	-7.70335	600	-2	NA	NA	0.747547	NA
17792513	17793013	AT1G48180	Yes	1	17792448	17793717	0.606121	0.658537	17792513	17793013	AT1G48150	NA	1	17785396	17786368	0.561508	0.869547	64	1	17785415	17785915	+	963	interaction28075	7098	7	0.070445	1	1	0.070445	100	-0.451351	40	734	-7.70335	600	-2	-1.54461	NA	0.747547	NA
23173403	23173903	AT1G62580	NA	1	23173332	23176931	0.694913	0.571638	23173403	23173903	AT1G62560	NA	1	23159822	23162649	1.61088	1.67286	79	1	23160064	23160564	+	1275	interaction41228	13339	7	0.070445	1	1	0.070445	100	-0.451351	40	1163	-7.70335	600	-2	-0.575999	0.486049	-0.823086	1.22e-06
366612	367112	AT2G01830	NA	2	362982	369707	0.661279	0.410157	366612	367112	AT2G01780	Yes	2	338023	339871	1.47617	2.64449	68	2	339502	340002	+	1214	interaction59440	27110	7	0.070445	1	1	0.070445	100	-0.451351	40	853	-7.70335	600	-2	-0.496927	0.00151742	NA	NA
13837029	13837529	AT2G32610	NA	2	13836233	13839513	2.22582	2.75918	13837029	13837529	AT2G32590	NA	2	13829419	13833209	0.572883	0.428338	1903	2	13831030	13831530	+	80	interaction76481	5999	7	0.070445	1	1	0.070445	100	-0.451351	1547	40	-7.70335	600	-2	0.422206	0.37955	-0.311577	0.191487
14446451	14446951	AT2G34210	Yes	2	14445937	14450522	1.16228	1.74944	14446451	14446951	AT2G34190	NA	2	14436808	14439516	0.82143	0.461976	1920	2	14437968	14438468	+	76	interaction77869	8483	7	0.070445	1	1	0.070445	100	-0.451351	1616	40	-7.70335	600	-2	-0.431997	0.708634	-0.539058	0.00217387
5813593	5814093	AT1G17000	Yes	1	5812727	5816662	1.51032	2.09837	5813593	5814093	AT1G16980	NA	1	5807310	5811488	1.46939	1.58897	1023	1	5808551	5809051	+	506	interaction11600	5042	17	0.070445	0	6	0.070445	600	-7.45309	818	419	-7.69814	1100	-12	1.73974	NA	-1.17601	NA
27588582	27589082	AT1G73380	NA	1	27589031	27590822	0.792551	0.419305	27588582	27589082	AT1G73340	Yes	1	27573115	27575419	0.761635	0.853675	57	1	27573504	27574004	+	1846	interaction53516	15078	7	0.070445	1	1	0.070445	100	-0.45153	41	1319	-7.69621	600	-2	0.610598	1.22e-06	-0.806954	0.0950837
28009993	28010493	AT1G74530	NA	1	28009522	28012162	0.842884	0.398286	28009993	28010493	AT1G74500	NA	1	27998174	27998821	4.57984	7.3847	55	1	27998579	27999079	+	1709	interaction54394	11414	7	0.070445	1	1	0.070445	100	-0.45153	41	1713	-7.69621	600	-2	-0.142442	0.338486	-0.328001	0.460695
29022089	29022589	AT1G77250	NA	1	29020264	29023474	0.81615	0.413472	29022089	29022589	AT1G77210	Yes	1	29008938	29012096	0.740176	2.00002	1561	1	29009915	29010415	+	74	interaction56061	12174	7	0.070445	1	1	0.070445	100	-0.45153	1410	41	-7.69621	600	-2	0.0297011	0.903748	0.41642	0.143764
29064451	29064951	AT1G77330	Yes	1	29062989	29064537	0.857524	1.38481	29064451	29064951	AT1G77320	NA	1	29056531	29062966	0.686802	0.453698	306	1	29061130	29061630	+	74	interaction56194	3321	7	0.070445	1	1	0.070445	100	-0.45153	287	41	-7.69621	600	-2	0.0229385	0.944982	0.141629	0.541973
24407568	24408068	AT1G65630	NA	1	24406541	24409068	3.47943	5.25495	24407568	24408068	AT1G65620	NA	1	24398142	24400969	4.91499	8.79531	996	1	24397996	24398496	+	411	interaction44638	9572	17	0.070445	0	6	0.070445	600	-7.45268	808	426	-7.6962	1100	-12	-1.12118	NA	-0.494138	0.0401227
22792469	22792969	AT1G61720	Yes	1	22791167	22792800	0.953593	1.39552	22792469	22792969	AT1G61710	Yes	1	22788858	22790576	1.87302	3.19583	268	1	22789158	22789658	+	961	interaction40501	3311	33	0.070445	0	17	0.070445	1700	-34.9483	247	767	-7.69409	1600	-34	-0.896191	NA	-0.523725	0.610734
1008651	1009151	AT2G03330	Yes	2	1008459	1014122	1.104	1.92667	1008651	1009151	AT2G03260	NA	2	987933	992332	1.12771	1.17435	1339	2	991130	991630	+	68	interaction60007	17521	7	0.070445	1	1	0.070445	100	-0.451702	1285	42	-7.68942	600	-2	0.0922266	0.634065	0.326705	0.372911
11809123	11809623	AT2G27690	NA	2	11809305	11811215	1.34355	1.72971	11809123	11809623	AT2G27680	NA	2	11803810	11806013	0.81425	0.506427	896	2	11805150	11805650	+	56	interaction71142	3973	7	0.070445	1	1	0.070445	100	-0.451702	1227	42	-7.68942	600	-2	-0.122993	0.960712	-0.0759772	0.66447
11716637	11717137	AT2G27385	NA	2	11716000	11717432	1.41816	1.79032	11716637	11717137	AT2G27360	NA	2	11706197	11708065	0.927127	1.09489	1451	2	11706489	11706989	+	216	interaction70842	10148	20	0.070445	0	8	0.070445	800	-11.6112	1330	177	-7.68813	1200	-16	-0.599259	0.00225195	-0.279154	0.115995
5807313	5807813	AT1G16980	NA	1	5807310	5811488	1.46939	1.58897	5807313	5807813	AT1G16970	NA	1	5800766	5805799	0.827691	0.472976	679	1	5802387	5802887	+	57	interaction11526	4926	7	0.070445	1	1	0.070445	100	-0.451865	606	43	-7.68298	600	-2	-1.17601	NA	0.0505893	0.783332
8050989	8051489	AT2G18550	NA	2	8049662	8051213	1.73532	3.61534	8050989	8051489	AT2G18530	NA	2	8039669	8040780	0.973686	0.793127	1195	2	8040533	8041033	+	56	interaction65182	10456	7	0.070445	1	1	0.070445	100	-0.451865	1322	43	-7.68298	600	-2	-0.359996	0.68483	-1.17601	NA
9280845	9281345	AT2G21730	Yes	2	9280043	9281623	1.47657	4.99706	9280845	9281345	AT2G21680	Yes	2	9267729	9269019	0.913453	5.25443	972	2	9268391	9268891	+	59	interaction66882	12454	7	0.070445	1	1	0.070445	100	-0.451865	646	43	-7.68298	600	-2	-2.52864	1.14e-05	NA	NA
4841304	4841804	AT1G14160	NA	1	4840696	4841848	0.633794	0.72058	4841304	4841804	AT1G14100	Yes	1	4827960	4829587	1.84835	2.38541	52	1	4828497	4828997	+	2101	interaction9842	12807	7	0.070445	1	1	0.070445	100	-0.452021	44	1729	-7.67684	600	-2	-0.349957	0.354784	-1.05328	0.458503
5338057	5338557	AT1G15520	Yes	1	5331857	5338326	0.567806	0.62388	5338057	5338557	AT1G15500	NA	1	5326289	5328874	0.671683	0.406649	677	1	5327464	5327964	+	54	interaction10955	10593	7	0.070445	1	1	0.070445	100	-0.452021	582	44	-7.67684	600	-2	2.4801	8.38e-05	0.132522	0.210406
19774083	19774583	AT1G53050	NA	1	19772044	19775747	0.770869	0.41355	19774083	19774583	AT1G53025	Yes	1	19756823	19759623	0.736094	0.906853	66	1	19758882	19759382	+	1850	interaction32805	15201	7	0.070445	1	1	0.070445	100	-0.452021	44	1793	-7.67684	600	-2	-0.13283	0.407737	-0.341647	0.0602024
11000502	11001002	AT2G25790	NA	2	11000598	11004235	3.25083	4.24156	11000502	11001002	AT2G25760	NA	2	10984807	10988924	0.784553	0.419741	1363	2	10984973	10985473	+	67	interaction69744	15529	7	0.070445	1	1	0.070445	100	-0.452021	1106	44	-7.67684	600	-2	0.384545	0.0332508	0.173643	0.159352
7760426	7760926	AT1G22030	Yes	1	7759163	7760556	0.660957	1.48055	7760426	7760926	AT1G22015	NA	1	7751001	7753519	2.20122	3.33419	64	1	7753111	7753611	+	1651	interaction15060	7315	7	0.070445	1	1	0.070445	100	-0.452169	45	1344	-7.67099	600	-2	-0.29566	0.126095	NA	NA
9166547	9167047	AT1G26530	NA	1	9165359	9167490	0.568337	0.373738	9166547	9167047	AT1G26480	Yes	1	9156328	9157950	0.84234	0.677635	69	1	9157480	9157980	+	746	interaction18025	9067	7	0.070445	1	1	0.070445	100	-0.452169	45	814	-7.67099	600	-2	0.103383	0.876469	NA	NA
9396983	9397483	AT1G27070	NA	1	9396657	9399453	0.562945	0.380745	9396983	9397483	AT1G27045	Yes	1	9391608	9393019	1.13942	0.881488	60	1	9392104	9392604	+	1028	interaction18404	4879	7	0.070445	1	1	0.070445	100	-0.452169	45	984	-7.67099	600	-2	-0.0837025	0.65372	0.417318	0.622801
19715998	19716498	AT1G52940	NA	1	19716401	19723725	0.736366	0.454243	19715998	19716498	AT1G52920	Yes	1	19709274	19711052	0.679367	0.801787	66	1	19709975	19710475	+	1068	interaction32572	6023	7	0.070445	1	1	0.070445	100	-0.452169	45	994	-7.67099	600	-2	-2.01624	0.192074	-0.929025	0.0327338
24066441	24066941	AT1G64790	NA	1	24064936	24083428	0.823674	0.481374	24066441	24066941	AT1G64660	Yes	1	24028917	24030780	0.834738	1.72807	74	1	24029009	24029509	+	1953	interaction43563	37432	7	0.070445	1	1	0.070445	100	-0.452169	45	1738	-7.67099	600	-2	-0.0235748	0.915048	0.88306	0.00475227
29871509	29872009	AT1G79420	NA	1	29871457	29874315	0.80559	0.496994	29871509	29872009	AT1G79390	NA	1	29863224	29864321	0.662946	0.390965	825	1	29863507	29864007	+	63	interaction58167	8002	7	0.070445	1	1	0.070445	100	-0.452169	895	45	-7.67099	600	-2	0.06934	0.78759	0.11411	0.552559
8285003	8285503	AT2G19110	NA	2	8278880	8286445	0.972144	0.539961	8285003	8285503	AT2G19070	NA	2	8260037	8261985	2.717	3.10802	73	2	8261468	8261968	+	1240	interaction65895	23535	7	0.070445	1	1	0.070445	100	-0.452169	45	1173	-7.67099	600	-2	-0.2163	0.192553	NA	NA
10437622	10438122	AT2G24570	NA	2	10437397	10439298	1.07544	0.90166	10437622	10438122	AT2G24560	Yes	2	10431536	10432933	1.07489	1.50579	97	2	10432492	10432992	+	1341	interaction68984	5130	15	0.070445	0	5	0.070445	500	-5.67323	102	1083	-7.6685	1000	-10	-0.119469	0.520367	1.41463	0.388018
3279343	3279843	AT1G10050	NA	1	3279269	3283482	0.652787	0.425587	3279343	3279843	AT1G10030	NA	1	3273824	3275837	0.701062	0.514195	589	1	3274534	3275034	+	60	interaction6161	4809	7	0.070445	1	1	0.070445	100	-0.452312	567	46	-7.66541	600	-2	0.247012	0.0865838	-0.201409	0.244551
11925947	11926447	AT1G32910	Yes	1	11925425	11926908	1.06854	0.753191	11925947	11926447	AT1G32900	NA	1	11920389	11923766	0.780338	0.477768	540	1	11923077	11923577	+	66	interaction23588	2870	7	0.070445	1	1	0.070445	100	-0.452312	479	46	-7.66541	600	-2	2.84515	0.0310958	-0.538805	0.00149704
29413998	29414498	AT1G78170	Yes	1	29414058	29415094	1.30497	2.29106	29413998	29414498	AT1G78130	NA	1	29400139	29401902	0.551064	0.328616	467	1	29400982	29401482	+	68	interaction56790	13016	7	0.070445	1	1	0.070445	100	-0.452312	463	46	-7.66541	600	-2	-0.205399	0.624433	0.339129	0.158937
746983	747483	AT2G02680	Yes	2	745774	748573	2.05013	4.3754	746983	747483	AT2G02650	NA	2	735410	736546	4.11886	7.40573	1254	2	735497	735997	+	71	interaction59728	11486	7	0.070445	1	1	0.070445	100	-0.452312	949	46	-7.66541	600	-2	0.0680396	0.887229	NA	NA
14563432	14563932	AT2G34570	NA	2	14562891	14564782	0.684889	0.390997	14563432	14563932	AT2G34555	Yes	2	14556987	14558697	0.69152	1.74831	55	2	14557872	14558372	+	1307	interaction78381	5560	7	0.070445	1	1	0.070445	100	-0.452312	46	1186	-7.66541	600	-2	0.264163	0.133026	-1.27124	NA
13407590	13408090	AT2G31470	Yes	2	13407491	13408655	1.31807	2.60376	13407590	13408090	AT2G31460	Yes	2	13404775	13405510	1.95696	3.95744	586	2	13405017	13405517	+	1048	interaction75181	2573	17	0.070445	0	6	0.070445	600	-7.44517	615	860	-7.66086	1100	-12	0.373689	NA	NA	NA
8890949	8891449	AT1G25350	NA	1	8889109	8894261	0.7726	0.457269	8890949	8891449	AT1G25330	NA	1	8880266	8882100	2.10478	2.87825	61	1	8881483	8881983	+	1322	interaction17603	9466	7	0.070445	1	1	0.070445	100	-0.452448	47	1169	-7.66008	600	-2	0.131669	0.316509	-1.17601	NA
1476514	1477014	AT2G04270	NA	2	1474678	1480586	0.633075	0.411258	1476514	1477014	AT2G04235	NA	2	1449413	1455237	0.80947	0.48317	54	2	1450056	1450556	+	1263	interaction60838	26458	7	0.070445	1	1	0.070445	100	-0.452448	47	1065	-7.66008	600	-2	-0.283299	0.0214994	-0.292443	0.148655
10333498	10333998	AT2G24280	NA	2	10333283	10337128	0.602571	0.473557	10333498	10333998	AT2G24255	Yes	2	10315514	10317353	3.13033	5.9309	71	2	10317308	10317808	+	998	interaction68629	16190	7	0.070445	1	1	0.070445	100	-0.452448	47	957	-7.66008	600	-2	-0.427239	0.00484225	0.573738	NA
2351586	2352086	AT1G07630	NA	1	2349096	2351692	0.767207	0.471119	2351586	2352086	AT1G07620	Yes	1	2344389	2346842	0.668453	1.63077	52	1	2345971	2346471	+	1029	interaction4913	5615	7	0.070445	1	1	0.070445	100	-0.452578	48	1209	-7.65499	600	-2	0.22409	0.134204	-0.444424	0.189033
17378566	17379066	AT1G47389	NA	1	17378651	17379374	4.67928	6.3804	17378566	17379066	AT1G47350	NA	1	17358446	17360722	3.48068	4.33804	1950	1	17360100	17360600	+	66	interaction26969	18466	7	0.070445	1	1	0.070445	100	-0.452578	1725	48	-7.65499	600	-2	NA	NA	NA	NA
21641488	21641988	AT1G58330	NA	1	21641129	21642041	2.71016	4.33298	21641488	21641988	AT1G58280	NA	1	21620330	21622611	0.864743	0.470257	2085	1	21619964	21620464	+	64	interaction37061	21524	7	0.070445	1	1	0.070445	100	-0.452578	1975	48	-7.65499	600	-2	1.38019	NA	-0.11158	0.623608
13217440	13217940	AT2G31060	NA	2	13213099	13218724	0.861709	0.433802	13217440	13217940	AT2G31035	NA	2	13208666	13208918	0.534543	0.373717	1383	2	13208001	13208501	+	60	interaction74653	9439	7	0.070445	1	1	0.070445	100	-0.452578	1153	48	-7.65499	600	-2	0.386727	0.0285027	-1.01748	NA
17267459	17267959	AT2G41420	NA	2	17266476	17268024	0.696462	0.45924	17267459	17267959	AT2G41380	NA	2	17251940	17253057	1.82096	1.72254	63	2	17252341	17252841	+	1879	interaction83900	15118	7	0.070445	1	1	0.070445	100	-0.452578	48	1838	-7.65499	600	-2	0.696795	0.0122962	0.357912	0.184556
19830942	19831442	AT1G53180	Yes	1	19831440	19832895	1.2118	2.69009	19830942	19831442	AT1G53165	NA	1	19813803	19819564	0.739831	0.430602	873	1	19815025	19815525	+	58	interaction32923	15917	7	0.070445	1	1	0.070445	100	-0.452703	888	49	-7.65012	600	-2	0.0854871	0.773636	0.135409	0.314395
26832105	26832605	AT1G71180	NA	1	26832334	26833709	0.627229	0.383781	26832105	26832605	AT1G71160	Yes	1	26828700	26830208	2.09727	4.351	75	1	26829560	26830060	+	681	interaction51981	2545	7	0.070445	1	1	0.070445	100	-0.452703	49	425	-7.65012	600	-2	-0.0081112	0.973746	NA	NA
29298657	29299157	AT1G77920	Yes	1	29298242	29300863	0.987812	2.9867	29298657	29299157	AT1G77880	NA	1	29285901	29287067	0.580817	0.595756	1488	1	29285907	29286407	+	65	interaction56589	12750	7	0.070445	1	1	0.070445	100	-0.452703	1466	49	-7.65012	600	-2	-0.431158	0.10459	0.0871958	0.909447
7565452	7565952	AT2G17420	NA	2	7564344	7566539	0.686594	0.373179	7565452	7565952	AT2G17350	NA	2	7545537	7546374	0.798037	0.37382	1716	2	7545894	7546394	+	66	interaction63831	19558	7	0.070445	1	1	0.070445	100	-0.452703	1366	49	-7.65012	600	-2	0.197528	0.0660054	-0.120316	0.447065
14082459	14082959	AT2G33233	Yes	2	14083029	14083614	1.02977	3.18278	14082459	14082959	AT2G33190	Yes	2	14067971	14069111	1.20796	1.59081	53	2	14068490	14068990	+	2089	interaction77269	13969	7	0.070445	1	1	0.070445	100	-0.452703	49	1901	-7.65012	600	-2	NA	NA	NA	NA
592506	593006	AT1G02720	NA	1	591825	594236	0.611206	0.389329	592506	593006	AT1G02670	NA	1	576045	580299	0.657928	0.45662	1970	1	578492	578992	+	86	interaction1310	14014	7	0.070445	1	1	0.070445	100	-0.452824	1898	50	-7.64545	600	-2	0.14201	0.3228	0.442264	0.117846
1214650	1215150	AT1G04470	Yes	1	1211048	1214662	0.795441	2.80498	1214650	1215150	AT1G04430	NA	1	1198117	1201527	0.541789	0.390578	1533	1	1200424	1200924	+	74	interaction2729	14226	7	0.070445	1	1	0.070445	100	-0.452824	1364	50	-7.64545	600	-2	0.0579341	NA	0.846625	0.00945946
4178968	4179468	AT1G12290	NA	1	4178358	4182593	0.683675	0.409999	4178968	4179468	AT1G12250	NA	1	4159264	4161455	0.859325	0.50138	89	1	4159466	4159966	+	1279	interaction8371	19502	7	0.070445	1	1	0.070445	100	-0.452824	50	1311	-7.64545	600	-2	0.0185901	0.953706	-0.181778	0.299586
29742404	29742904	AT1G79060	NA	1	29741747	29743600	0.511214	0.55747	29742404	29742904	AT1G79020	NA	1	29727122	29730431	0.602168	0.509587	1161	1	29727131	29727631	+	47	interaction58075	15273	7	0.070445	1	1	0.070445	100	-0.452824	1132	50	-7.64545	600	-2	-0.466147	0.00204599	0.109521	0.528712
1690869	1691369	AT1G05650	NA	1	1690263	1692126	2.39231	2.81303	1690869	1691369	AT1G05620	Yes	1	1679157	1681710	0.751339	0.598073	1236	1	1679518	1680018	+	64	interaction3535	11351	7	0.070445	1	1	0.070445	100	-0.452939	1161	51	-7.64097	600	-2	1.62976	0.105943	0.108964	0.603093
23497047	23497547	AT1G63350	NA	1	23494934	23497631	1.10136	1.12739	23497047	23497547	AT1G63300	Yes	1	23482192	23486220	0.569553	0.431247	1373	1	23482557	23483057	+	98	interaction41904	14490	7	0.070445	1	1	0.070445	100	-0.452939	1449	51	-7.64097	600	-2	0.5405	0.00229003	-0.154319	0.451574
695488	695988	AT2G02560	NA	2	689787	697596	0.790146	0.438051	695488	695988	AT2G02540	NA	2	683646	685309	2.77416	3.19915	78	2	684158	684658	+	996	interaction59668	11330	7	0.070445	1	1	0.070445	100	-0.452939	51	1021	-7.64097	600	-2	0.0213616	0.930798	0.0134104	0.973708
29614051	29614551	AT1G78750	Yes	1	29613121	29614695	2.01767	3.02586	29614051	29614551	AT1G78720	Yes	1	29605628	29607510	1.80511	3.80567	966	1	29606022	29606522	+	1565	interaction57543	8029	17	0.073541	0	6	0.070445	600	-7.44013	876	1148	-7.63738	1028.41	-12	1.03214	0.0105526	-2.50936	4.67e-09
20026992	20027492	AT1G53645	NA	1	20026146	20028635	0.881676	0.5204	20026992	20027492	AT1G53640	NA	1	20020884	20025461	2.33132	2.74191	848	1	20024925	20025425	+	98	interaction33271	2067	15	0.070445	0	5	0.070445	500	-5.66857	699	110	-7.63712	1000	-10	0.313637	0.0096696	-0.059848	0.909713
8665822	8666322	AT1G24460	NA	1	8665873	8672651	0.753382	0.411802	8665822	8666322	AT1G24430	Yes	1	8658002	8659506	0.737803	0.932953	80	1	8658903	8659403	+	1239	interaction17265	6919	7	0.070445	1	1	0.070445	100	-0.45305	52	1065	-7.63667	600	-2	0.110304	0.549457	-0.448994	0.0871739
21140409	21140909	AT1G56440	NA	1	21138529	21141571	0.740826	0.496033	21140409	21140909	AT1G56400	NA	1	21111804	21113621	2.7728	4.35732	57	1	21113432	21113932	+	1578	interaction36187	26977	7	0.070445	1	1	0.070445	100	-0.45305	52	1181	-7.63667	600	-2	-0.105529	0.691064	NA	NA
21868506	21869006	AT1G59530	NA	1	21868261	21868708	1.21924	1.08507	21868506	21869006	AT1G59520	NA	1	21861381	21866190	0.742016	0.457654	501	1	21865075	21865575	+	72	interaction37681	3431	7	0.070445	1	1	0.070445	100	-0.45305	382	52	-7.63667	600	-2	0.570366	NA	0.0980098	0.498395
22012509	22013009	AT1G59820	NA	1	22011327	22020294	0.768834	0.554891	22012509	22013009	AT1G59810	Yes	1	22008603	22009455	1.80412	8.03272	83	1	22008465	22008965	+	1472	interaction38376	4044	7	0.070445	1	1	0.070445	100	-0.453156	53	1235	-7.63255	600	-2	0.31918	0.0306171	-1.75969	NA
13080444	13080944	AT2G30695	NA	2	13079089	13081399	0.795796	0.484443	13080444	13080944	AT2G30660	NA	2	13058249	13061673	2.90366	4.36382	70	2	13061105	13061605	+	1974	interaction74471	19339	7	0.070445	1	1	0.070445	100	-0.453156	53	1542	-7.63255	600	-2	-0.143396	0.38328	0.0477111	0.96415
2272530	2273030	AT1G07390	NA	1	2269892	2274820	0.720863	0.370872	2272530	2273030	AT1G07340	Yes	1	2254821	2256850	0.748772	4.7784	93	1	2255332	2255832	+	1596	interaction4713	17198	7	0.070445	1	1	0.070445	100	-0.453259	54	1450	-7.62858	600	-2	0.307525	0.27029	NA	NA
28301573	28302073	AT1G75410	Yes	1	28299791	28302603	0.754383	2.06089	28301573	28302073	AT1G75380	NA	1	28281388	28284045	0.656797	0.414406	816	1	28282052	28282552	+	61	interaction55127	19521	7	0.070445	1	1	0.070445	100	-0.453259	889	54	-7.62858	600	-2	-1.45708	2.2e-25	-0.130882	0.639241
8956345	8956845	AT2G20805	Yes	2	8956168	8956737	1.60158	1.74628	8956345	8956845	AT2G20790	NA	2	8949927	8952744	0.503316	0.381899	947	2	8951062	8951562	+	85	interaction66481	5283	7	0.070445	1	1	0.070445	100	-0.453259	931	54	-7.62858	600	-2	NA	NA	0.124539	0.327936
10316089	10316589	AT2G24255	Yes	2	10315514	10317353	3.13033	5.9309	10316089	10316589	AT2G24230	NA	2	10301816	10304812	0.696329	0.346387	1173	2	10303055	10303555	+	73	interaction68560	13034	7	0.070445	1	1	0.070445	100	-0.453259	893	54	-7.62858	600	-2	0.573738	NA	-0.388086	0.0762494
11409986	11410486	AT2G26780	NA	2	11410075	11423776	0.771023	0.465479	11409986	11410486	AT2G26740	NA	2	11392964	11394279	0.796731	0.668488	56	2	11393493	11393993	+	1946	interaction70316	16493	7	0.070445	1	1	0.070445	100	-0.453259	54	1840	-7.62858	600	-2	0.0474872	0.809307	0.31161	0.222245
11848688	11849188	AT2G27790	NA	2	11847108	11849559	0.649007	0.429878	11848688	11849188	AT2G27775	NA	2	11842266	11843293	1.07877	0.475058	485	2	11842558	11843058	+	97	interaction71218	6130	7	0.070445	1	1	0.070445	100	-0.453259	356	54	-7.62858	600	-2	-0.0350197	0.907529	0.26189	0.228347
27529000	27529500	AT1G73210	NA	1	27528051	27530952	0.627139	0.36406	27529000	27529500	AT1G73170	NA	1	27511660	27514797	0.835604	0.422416	88	1	27514487	27514987	+	1426	interaction53392	14513	7	0.070445	1	1	0.070445	100	-0.453358	55	1329	-7.62477	600	-2	-0.538223	0.140848	-0.553441	0.000201387
28064034	28064534	AT1G74690	NA	1	28061158	28064625	0.609691	0.389197	28064034	28064534	AT1G74660	NA	1	28047575	28048127	5.08122	6.93859	79	1	28047497	28047997	+	834	interaction54512	16537	7	0.070445	1	1	0.070445	100	-0.453358	55	823	-7.62477	600	-2	-0.13822	0.29785	-0.0291652	0.919085
1132109	1132609	AT2G03720	NA	2	1132169	1133379	1.01254	0.75836	1132109	1132609	AT2G03670	NA	2	1117506	1120436	0.694354	0.412914	926	2	1119568	1120068	+	68	interaction60339	12541	7	0.070445	1	1	0.070445	100	-0.453358	973	55	-7.62477	600	-2	-0.577588	0.103489	0.25228	0.224881
12037568	12038068	AT2G28230	NA	2	12037676	12039046	0.713944	0.389058	12037568	12038068	AT2G28210	NA	2	12029996	12032420	1.63829	1.3284	629	2	12029618	12030118	+	90	interaction71612	7950	7	0.070445	1	1	0.070445	100	-0.453358	540	55	-7.62477	600	-2	0.0830006	0.651449	0.518065	0.302459
15107202	15107702	AT2G35960	NA	2	15106939	15107993	0.706439	0.754007	15107202	15107702	AT2G35950	Yes	2	15104760	15106088	0.785046	2.29428	859	2	15105900	15106400	+	39	interaction79704	1302	7	0.070445	1	1	0.070445	100	-0.453358	860	55	-7.62477	600	-2	-1.54134	1.98e-32	-1.09931	0.000622229
31561	32061	AT1G01050	NA	1	31169	33153	0.580764	0.392248	31561	32061	AT1G01010	Yes	1	3630	5899	0.683981	0.42405	66	1	4134	4634	+	855	interaction22	27427	7	0.070445	1	1	0.070445	100	-0.453454	56	728	-7.6211	600	-2	-0.0332129	0.846469	NA	NA
2888940	2889440	AT1G08990	NA	1	2888752	2890959	3.26534	4.97143	2888940	2889440	AT1G08920	NA	1	2867258	2870656	0.654521	0.79963	1861	1	2862545	2863045	+	77	interaction5382	26395	7	0.070445	1	1	0.070445	100	-0.453454	1709	56	-7.6211	600	-2	-0.738566	0.00260096	-1.12648	5e-06
7324988	7325488	AT2G16900	NA	2	7323614	7326221	0.700139	0.348748	7324988	7325488	AT2G16870	NA	2	7308076	7311686	0.696712	0.399928	70	2	7311566	7312066	+	1045	interaction63264	13422	7	0.070445	1	1	0.070445	100	-0.453454	56	1105	-7.6211	600	-2	0.0771387	0.707212	0.387341	0.10125
11936428	11936928	AT2G28040	Yes	2	11936053	11937401	0.645206	0.946005	11936428	11936928	AT2G27980	NA	2	11913628	11919741	0.643608	0.476115	1538	2	11916001	11916501	+	76	interaction71391	20427	7	0.070445	1	1	0.070445	100	-0.453454	1151	56	-7.6211	600	-2	1.09154	0.000410154	-0.169507	0.251829
15537500	15538000	AT2G36990	NA	2	15537257	15540139	0.692295	0.458364	15537500	15538000	AT2G36970	NA	2	15529005	15530749	1.33053	1.10058	73	2	15530003	15530503	+	636	interaction80716	7497	7	0.070445	1	1	0.070445	100	-0.453454	56	707	-7.6211	600	-2	-0.306495	0.0206861	-0.232679	0.407752
7516536	7517036	AT1G21470	Yes	1	7516708	7517179	3.21223	4.92217	7516536	7517036	AT1G21450	NA	1	7508968	7511801	0.68623	0.436756	599	1	7509956	7510456	+	86	interaction14611	6580	7	0.070445	1	1	0.070445	100	-0.453546	485	57	-7.61756	600	-2	0.027156	0.977055	-0.121301	0.424328
7899434	7899934	AT1G22370	NA	1	7898012	7899879	0.90418	0.726981	7899434	7899934	AT1G22300	NA	1	7878768	7881219	0.643314	0.434074	1475	1	7879953	7880453	+	76	interaction15358	19481	7	0.070445	1	1	0.070445	100	-0.453546	1581	57	-7.61756	600	-2	-0.420397	0.00742604	-0.121417	0.241893
29141516	29142016	AT1G77550	NA	1	29138298	29143011	0.695874	0.467637	29141516	29142016	AT1G77520	Yes	1	29130402	29132180	1.11637	1.91159	94	1	29131001	29131501	+	645	interaction56341	10515	7	0.070445	1	1	0.070445	100	-0.453546	57	718	-7.61756	600	-2	0.301184	0.0274108	-0.531576	0.0958783
14565556	14566056	AT2G34580	NA	2	14565659	14567673	0.821582	0.507853	14565556	14566056	AT2G34555	Yes	2	14556987	14558697	0.69152	1.74831	91	2	14557871	14558371	+	1307	interaction78385	7685	7	0.070445	1	1	0.070445	100	-0.453546	57	1186	-7.61756	600	-2	-0.963966	0.505424	-1.27124	NA
15997893	15998393	AT2G38180	NA	2	15997113	15998906	0.735585	0.490375	15997893	15998393	AT2G38152	Yes	2	15984061	15985278	1.59611	1.69548	902	2	15984897	15985397	+	84	interaction81345	12996	7	0.070445	1	1	0.070445	100	-0.453546	931	57	-7.61756	600	-2	-0.290748	0.246329	-0.127616	0.865463
435554	436054	AT1G02230	Yes	1	435173	436776	0.67918	5.79655	435554	436054	AT1G02205	NA	1	418747	422438	2.08162	4.38456	1541	1	422089	422589	+	87	interaction684	13465	13	0.070445	1.4e-05	4	0.070445	400	-4.02578	1373	54	-7.6147	900	-8	-1.99293	0.0027671	-0.374849	0.107768
477454	477954	AT1G02380	Yes	1	476999	478971	0.704052	1.11926	477454	477954	AT1G02370	NA	1	474499	476511	0.522255	0.405641	378	1	475094	475594	+	83	interaction832	2360	7	0.070445	1	1	0.070445	100	-0.453634	417	58	-7.61415	600	-2	-0.033412	0.949824	0.472706	0.00345575
8895991	8896491	AT1G25360	NA	1	8894427	8896800	0.75416	0.447026	8895991	8896491	AT1G25320	NA	1	8877856	8880310	0.931833	0.486092	83	1	8878470	8878970	+	1925	interaction17607	17521	7	0.070445	1	1	0.070445	100	-0.453634	58	1470	-7.61415	600	-2	0.106984	0.764478	0.280395	0.0690669
20946970	20947470	AT1G56010	NA	1	20946570	20949281	0.804062	0.49223	20946970	20947470	AT1G55970	NA	1	20932128	20938290	0.675743	0.446698	68	1	20937507	20938007	+	1164	interaction35892	9463	7	0.070445	1	1	0.070445	100	-0.453634	58	919	-7.61415	600	-2	0.407606	0.00474173	-0.360099	0.0554012
7591134	7591634	AT2G17480	NA	2	7590294	7594090	0.788979	0.495714	7591134	7591634	AT2G17430	NA	2	7568017	7570840	0.619013	0.439301	91	2	7568134	7568634	+	1686	interaction63971	23000	7	0.070445	1	1	0.070445	100	-0.453634	58	1324	-7.61415	600	-2	0.719644	0.0401095	0.150967	0.664355
12742473	12742973	AT2G29880	NA	2	12742535	12743749	0.82468	0.680792	12742473	12742973	AT2G29760	Yes	2	12712883	12715852	0.700183	0.564593	71	2	12713519	12714019	+	1800	interaction73750	28954	7	0.070445	1	1	0.070445	100	-0.453634	58	1604	-7.61415	600	-2	NA	NA	0.383522	0.0676047
15426465	15426965	AT2G36810	NA	2	15425478	15439462	0.678547	0.470537	15426465	15426965	AT2G36780	NA	2	15417489	15419154	1.30985	1.41649	97	2	15418994	15419494	+	1182	interaction80465	7471	7	0.070445	1	1	0.070445	100	-0.453634	58	1334	-7.61415	600	-2	-0.180786	0.306007	1.04886	0.0100519
17496524	17497024	AT2G41910	Yes	2	17496955	17498077	1.97698	2.16809	17496524	17497024	AT2G41900	NA	2	17490404	17493922	0.657536	0.351907	865	2	17492445	17492945	+	96	interaction84456	4079	7	0.070445	1	1	0.070445	100	-0.453634	903	58	-7.61415	600	-2	NA	NA	-0.332417	0.0145046
1209360	1209860	AT1G04450	Yes	1	1208520	1209874	3.46929	5.69951	1209360	1209860	AT1G04410	NA	1	1189077	1191412	0.448533	0.327603	1012	1	1191048	1191548	+	85	interaction2668	18312	7	0.070445	1	1	0.070445	100	-0.45372	876	59	-7.61086	600	-2	2.04984	NA	-0.016947	0.94748
8143507	8144007	AT1G23000	Yes	1	8143403	8145070	0.908574	2.65613	8143507	8144007	AT1G22985	NA	1	8135212	8135920	0.604991	0.248228	65	1	8135489	8135989	+	754	interaction16001	8018	7	0.070445	1	1	0.070445	100	-0.45372	59	846	-7.61086	600	-2	-0.137253	0.684284	0.382261	0.0634364
19765021	19765521	AT1G53040	NA	1	19764309	19767348	0.65946	0.413017	19765021	19765521	AT1G53025	Yes	1	19756823	19759623	0.736094	0.906853	88	1	19758896	19759396	+	1850	interaction32798	6125	7	0.070445	1	1	0.070445	100	-0.453803	60	1793	-7.60769	600	-2	-0.110625	0.615182	-0.341647	0.0602024
23792401	23792901	AT1G64100	Yes	1	23791584	23795563	0.897846	2.10307	23792401	23792901	AT1G64060	NA	1	23769773	23776931	1.23565	1.6911	1883	1	23775886	23776386	+	58	interaction42587	16515	7	0.070445	1	1	0.070445	100	-0.453803	1398	60	-7.60769	600	-2	-2.80449	1.1e-41	-0.069779	0.759978
27280002	27280502	AT1G72460	Yes	1	27279509	27281533	0.855385	0.873234	27280002	27280502	AT1G72450	NA	1	27274064	27276317	0.733644	0.475896	81	1	27275938	27276438	+	893	interaction52932	4064	7	0.070445	1	1	0.070445	100	-0.453803	60	1161	-7.60769	600	-2	-0.214224	NA	-0.711955	0.581813
10174994	10175494	AT1G29120	NA	1	10174186	10178521	0.829147	0.444441	10174994	10175494	AT1G29090	NA	1	10162982	10164452	3.85361	5.36494	82	1	10163923	10164423	+	962	interaction20117	11071	7	0.070445	1	1	0.070445	100	-0.453883	61	793	-7.60462	600	-2	-0.0828934	0.547375	-0.355354	0.907529
1860400	1860900	AT2G05160	NA	2	1858542	1861895	0.722278	0.496472	1860400	1860900	AT2G05140	Yes	2	1853934	1854903	1.56821	2.3267	61	2	1853576	1854076	+	599	interaction61227	6824	7	0.070445	1	1	0.070445	100	-0.453883	61	476	-7.60462	600	-2	-0.565018	0.0167079	0.747547	NA
13523139	13523639	AT2G31800	NA	2	13520324	13523708	0.775682	0.474624	13523139	13523639	AT2G31760	NA	2	13508492	13510390	2.80044	3.95109	88	2	13508964	13509464	+	1575	interaction75561	14175	7	0.070445	1	1	0.070445	100	-0.453883	61	1377	-7.60462	600	-2	0.258164	0.0875199	NA	NA
18117615	18118115	AT2G43700	NA	2	18115091	18118844	0.630629	0.346252	18117615	18118115	AT2G43680	NA	2	18108348	18111831	0.655348	0.365841	124	2	18108967	18109467	+	1634	interaction86016	8648	7	0.070445	1	1	0.070445	100	-0.453883	61	1854	-7.60462	600	-2	-0.170912	0.62132	0.0387349	0.861135
24195023	24195523	AT1G65120	NA	1	24191347	24196073	0.649149	0.404581	24195023	24195523	AT1G65110	Yes	1	24183958	24188330	0.678284	0.516926	744	1	24187523	24188023	+	93	interaction43726	7500	7	0.070445	1	1	0.070445	100	-0.453961	621	62	-7.60166	600	-2	0.26664	0.402976	0.445557	0.498531
24839493	24839993	AT1G66580	NA	1	24839164	24840612	0.682868	0.402027	24839493	24839993	AT1G66550	Yes	1	24828501	24829639	0.508241	2.23519	78	1	24828436	24828936	+	1847	interaction47076	11057	7	0.070445	1	1	0.070445	100	-0.453961	62	1563	-7.60166	600	-2	0.352851	0.026823	-2.09711	NA
27895001	27895501	AT1G74170	NA	1	27891493	27896355	0.779889	0.463796	27895001	27895501	AT1G74120	Yes	1	27871273	27873260	0.58285	0.529982	73	1	27872475	27872975	+	1591	interaction54048	22526	7	0.070445	1	1	0.070445	100	-0.453961	62	1490	-7.60166	600	-2	-0.074415	0.805065	-0.0882866	0.713613
27894994	27895494	AT1G74170	NA	1	27891493	27896355	0.779889	0.463796	27894994	27895494	AT1G74140	Yes	1	27876904	27879780	1.24707	3.85648	73	1	27876984	27877484	+	1837	interaction54049	18010	7	0.070445	1	1	0.070445	100	-0.453961	62	1538	-7.60166	600	-2	-0.074415	0.805065	-0.894504	NA
14579973	14580473	AT2G34630	NA	2	14578539	14581727	0.698283	0.401082	14579973	14580473	AT2G34555	Yes	2	14556987	14558697	0.69152	1.74831	82	2	14557483	14557983	+	1929	interaction78395	22490	7	0.070445	1	1	0.070445	100	-0.453961	62	1908	-7.60166	600	-2	-0.300412	0.00386064	-1.27124	NA
14837048	14837548	AT2G35210	Yes	2	14836061	14838149	0.78558	3.9033	14837048	14837548	AT2G35170	NA	2	14827462	14829802	0.700284	0.392388	743	2	14829476	14829976	+	115	interaction78977	7572	7	0.070445	1	1	0.070445	100	-0.453961	623	62	-7.60166	600	-2	-1.03198	0.0198776	-0.223099	0.323806
15159973	15160473	AT2G36100	NA	2	15159590	15160750	2.99947	2.71922	15159973	15160473	AT2G36070	NA	2	15144835	15148131	0.8275	0.327676	1189	2	15145941	15146441	+	100	interaction79991	14032	7	0.070445	1	1	0.070445	100	-0.453961	1184	62	-7.60166	600	-2	-0.536784	0.0160061	-0.0242719	0.886712
5523467	5523967	AT1G16120	Yes	1	5522638	5524983	0.734435	1.62748	5523467	5523967	AT1G16110	NA	1	5518372	5520891	0.59992	0.52353	67	1	5519342	5519842	+	351	interaction11224	4125	7	0.070445	1	1	0.070445	100	-0.454036	63	313	-7.59879	600	-2	-0.933806	0.0223942	0.230916	0.310091
11249845	11250345	AT1G31420	NA	1	11249599	11253915	0.698026	0.436294	11249845	11250345	AT1G31340	NA	1	11217844	11219458	0.702745	0.34816	1827	1	11217550	11218050	+	72	interaction22337	32295	7	0.070445	1	1	0.070445	100	-0.454036	1658	63	-7.59879	600	-2	0.066311	0.713206	-0.140252	0.215598
19222392	19222892	AT1G51805	NA	1	19220976	19225690	1.40582	1.77598	19222392	19222892	AT1G51780	Yes	1	19204511	19206586	1.10366	1.97436	88	1	19204519	19205019	+	2050	interaction31083	17873	7	0.070445	1	1	0.070445	100	-0.454036	63	1767	-7.59879	600	-2	-0.921082	0.000255837	1.79267	NA
22223137	22223637	AT1G60270	Yes	1	22221676	22224257	1.22496	2.30658	22223137	22223637	AT1G60250	NA	1	22217076	22217832	3.9779	5.44043	766	1	22217470	22217970	+	82	interaction38808	5667	7	0.070445	1	1	0.070445	100	-0.454036	683	63	-7.59879	600	-2	-0.378121	0.481588	NA	NA
23406517	23407017	AT1G63110	NA	1	23404820	23408052	0.761559	0.39952	23406517	23407017	AT1G63070	NA	1	23385323	23387167	2.21823	3.77694	83	1	23387002	23387502	+	1429	interaction41863	19515	7	0.070445	1	1	0.070445	100	-0.454036	63	1342	-7.59879	600	-2	0.0862188	0.541956	2.23871	NA
23864928	23865428	AT1G64300	NA	1	23863065	23866045	0.601259	0.416684	23864928	23865428	AT1G64255	Yes	1	23844953	23847206	2.81339	4.60374	103	1	23844605	23845105	+	1870	interaction42905	20323	7	0.070445	1	1	0.070445	100	-0.454036	63	1814	-7.59879	600	-2	0.230992	0.462015	0.747547	NA
14146389	14146889	AT2G33380	Yes	2	14144830	14146471	1.03315	1.40312	14146389	14146889	AT2G33360	NA	2	14139797	14143118	0.637706	0.36021	950	2	14139927	14140427	+	72	interaction77326	6462	7	0.070445	1	1	0.070445	100	-0.454036	1299	63	-7.59879	600	-2	-0.942992	0.00152071	-0.426496	0.0108865
1554076	1554576	AT1G05320	Yes	1	1553602	1557733	0.883656	2.14007	1554076	1554576	AT1G05290	NA	1	1539151	1540562	4.60325	6.59813	1722	1	1538945	1539445	+	102	interaction3064	15131	7	0.070445	1	1	0.070445	100	-0.454109	1365	64	-7.59602	600	-2	-0.555684	4.6e-05	NA	NA
25012067	25012567	AT1G67020	Yes	1	25011007	25012987	0.546823	1.12409	25012067	25012567	AT1G66980	NA	1	24997308	25001983	0.921278	1.05425	1083	1	25000359	25000859	+	87	interaction47805	11708	7	0.070445	1	1	0.070445	100	-0.454109	924	64	-7.59602	600	-2	-0.0717503	0.952573	-0.583436	0.0004021
25168471	25168971	AT1G67260	NA	1	25167461	25169307	4.86628	8.83645	25168471	25168971	AT1G67210	NA	1	25140814	25144043	0.834113	0.442355	965	1	25143019	25143519	+	105	interaction48066	25452	7	0.070445	1	1	0.070445	100	-0.454109	726	64	-7.59602	600	-2	-2.17687	NA	-0.0640536	0.823874
12965055	12965555	AT1G35330	NA	1	12965045	12966113	3.13368	3.96375	12965055	12965555	AT1G35290	NA	1	12947543	12948841	1.45481	2.04104	109	1	12948605	12949105	+	1218	interaction25566	16450	7	0.070445	1	1	0.070445	100	-0.45418	65	831	-7.59334	600	-2	-0.225177	0.688178	-0.317576	0.564936
26789463	26789963	AT1G71015	NA	1	26789235	26790160	0.767381	0.277116	26789463	26789963	AT1G71002	NA	1	26773538	26773725	3.08405	4.29226	89	1	26773060	26773560	+	744	interaction51890	16403	7	0.070445	1	1	0.070445	100	-0.45418	65	882	-7.59334	600	-2	-0.59102	0.164545	NA	NA
7434461	7434961	AT1G21240	Yes	1	7434302	7436830	0.810995	1.76841	7434461	7434961	AT1G21210	Yes	1	7424105	7427041	0.622947	1.02119	738	1	7424986	7425486	+	140	interaction14223	9475	7	0.070445	1	1	0.070445	100	-0.454248	529	66	-7.59074	600	-2	1.0879	0.306925	-0.123625	0.848586
17617068	17617568	AT1G47840	Yes	1	17616106	17618894	0.805712	0.84475	17617068	17617568	AT1G47786	NA	1	17597897	17599099	2.42248	3.34991	98	1	17598828	17599328	+	1404	interaction27853	18240	7	0.070445	1	1	0.070445	100	-0.454248	66	1290	-7.59074	600	-2	0.328911	0.170246	NA	NA
9587963	9588463	AT2G22560	NA	2	9585882	9588838	0.739618	0.378605	9587963	9588463	AT2G22540	NA	2	9579873	9583893	0.95233	0.628355	81	2	9580035	9580535	+	978	interaction67584	7928	7	0.070445	1	1	0.070445	100	-0.454248	66	982	-7.59074	600	-2	-0.0231841	0.939487	-0.681283	4.03e-05
15718503	15719003	AT2G37440	Yes	2	15718052	15722108	2.05566	3.81419	15718503	15719003	AT2G37435	NA	2	15709807	15710912	4.69496	7.65719	289	2	15709840	15710340	+	77	interaction80857	8663	7	0.070445	1	1	0.070445	100	-0.454248	254	66	-7.59074	600	-2	-0.441971	0.179522	2.23871	NA
26282557	26283057	AT1G69818	Yes	1	26282368	26283012	1.01394	1.09394	26282557	26283057	AT1G69810	NA	1	26277237	26279118	3.64333	4.59068	67	1	26278154	26278654	+	519	interaction50627	4403	7	0.070445	1	1	0.070445	100	-0.454314	67	508	-7.58823	600	-2	-1.17601	NA	0.526902	0.0158012
12380564	12381064	AT2G28840	NA	2	12378336	12380742	0.816529	0.495925	12380564	12381064	AT2G28830	NA	2	12366747	12370684	0.931674	0.987155	62	2	12370041	12370541	+	1166	interaction72215	10523	7	0.070445	1	1	0.070445	100	-0.454314	67	1303	-7.58823	600	-2	0.174919	0.176929	-0.0577765	0.792234
22499061	22499561	AT1G61090	Yes	1	22499316	22500331	1.3809	4.08671	22499061	22499561	AT1G61080	Yes	1	22493193	22497019	1.15354	1.83034	1618	1	22493474	22493974	+	373	interaction39465	5587	33	0.070445	0	17	0.070445	1700	-34.8458	1433	309	-7.58748	1600	-34	NA	NA	0.0950956	0.886896
15838048	15838548	AT2G37780	Yes	2	15837441	15838302	1.08193	5.66715	15838048	15838548	AT2G37710	Yes	2	15814717	15817004	0.759424	0.928398	1884	2	15814989	15815489	+	109	interaction81009	23059	7	0.070445	1	1	0.070445	100	-0.454441	1792	69	-7.58342	600	-2	NA	NA	-0.468057	0.0122716
8580478	8580978	AT1G24220	Yes	1	8578657	8582413	0.846643	1.49947	8580478	8580978	AT1G24190	NA	1	8563557	8570505	0.785046	0.447965	77	1	8570342	8570842	+	678	interaction17021	10136	7	0.070445	1	1	0.070445	100	-0.454502	70	743	-7.58112	600	-2	-1.17601	NA	0.0909301	0.607054
20701470	20701970	AT1G55440	NA	1	20701498	20703460	3.33171	3.95311	20701470	20701970	AT1G55390	NA	1	20680875	20683043	2.49795	2.42734	123	1	20682522	20683022	+	1496	interaction35190	18948	7	0.070445	1	1	0.070445	100	-0.454502	70	1494	-7.58112	600	-2	0.549444	0.769569	1.12009	0.0533278
14532969	14533469	AT2G34480	NA	2	14532707	14534239	0.816395	0.441732	14532969	14533469	AT2G34370	NA	2	14510481	14511891	2.34583	3.28578	87	2	14510924	14511424	+	1317	interaction78300	22045	7	0.070445	1	1	0.070445	100	-0.454502	70	1025	-7.58112	600	-2	-0.0354379	0.838454	-0.862446	NA
22689363	22689863	AT1G61500	NA	1	22689728	22692881	0.650918	0.381029	22689363	22689863	AT1G61440	NA	1	22669244	22672323	0.635192	0.499207	1932	1	22671517	22672017	+	116	interaction39948	17846	7	0.070445	1	1	0.070445	100	-0.454561	1987	71	-7.57889	600	-2	0.0250261	0.929284	1.80199	1.09e-05
27914452	27914952	AT1G74230	Yes	1	27914698	27917083	0.765162	0.34737	27914452	27914952	AT1G74160	NA	1	27886425	27891431	0.694748	0.405587	1200	1	27888024	27888524	+	105	interaction54054	26428	7	0.070445	1	1	0.070445	100	-0.454561	1187	71	-7.57889	600	-2	0.0152234	0.923284	-0.425506	0.00407319
17501566	17502066	AT2G41930	Yes	2	17501628	17502684	1.40633	2.02793	17501566	17502066	AT2G41900	NA	2	17490404	17493922	0.657536	0.351907	1548	2	17491972	17492472	+	85	interaction84496	9594	7	0.070445	1	1	0.070445	100	-0.454561	1386	71	-7.57889	600	-2	-1.70419	NA	-0.332417	0.0145046
524020	524520	AT1G02520	Yes	1	523650	528745	0.63961	0.907521	524020	524520	AT1G02460	Yes	1	504672	507204	1.25011	0.935242	1720	1	505489	505989	+	79	interaction996	18531	7	0.070445	1	1	0.070445	100	-0.454618	1552	72	-7.57672	600	-2	1.06908	0.00061471	-0.73907	0.155481
24949411	24949911	AT1G66880	NA	1	24946927	24955611	0.796085	0.639481	24949411	24949911	AT1G66852	NA	1	24938499	24938832	2.99237	3.28429	66	1	24938466	24938966	+	2103	interaction47555	10945	7	0.070445	1	1	0.070445	100	-0.454618	72	1945	-7.57672	600	-2	0.275969	0.367286	NA	NA
4865111	4865611	AT1G14240	Yes	1	4864901	4868000	2.0031	3.14945	4865111	4865611	AT1G14220	NA	1	4858641	4859601	1.59591	1.43299	1003	1	4858498	4858998	+	158	interaction10019	6613	15	0.070445	0	5	0.070445	500	-5.65946	859	130	-7.57665	1000	-10	-0.475739	0.0379675	0.378451	0.40139
12947559	12948059	AT1G35290	NA	1	12947543	12948841	1.45481	2.04104	12947559	12948059	AT1G35240	NA	1	12927456	12930523	0.732914	0.59195	1697	1	12927514	12928014	+	122	interaction25366	20045	7	0.070445	1	1	0.070445	100	-0.454674	1468	73	-7.57462	600	-2	-0.317576	0.564936	-0.419151	0.586822
25416059	25416559	AT1G67785	NA	1	25416068	25416984	0.504113	0.331625	25416059	25416559	AT1G67750	NA	1	25401587	25403503	1.58879	1.10006	87	1	25402497	25402997	+	992	interaction48555	13562	7	0.070445	1	1	0.070445	100	-0.454674	73	963	-7.57462	600	-2	-0.216489	0.0893968	-0.971424	7.87e-05
1462004	1462504	AT2G04240	NA	2	1461629	1462937	0.953094	0.410026	1462004	1462504	AT2G04235	NA	2	1449413	1455237	0.80947	0.48317	77	2	1449324	1449824	+	459	interaction60799	12680	7	0.070445	1	1	0.070445	100	-0.454674	73	474	-7.57462	600	-2	0.0281038	0.92064	-0.292443	0.148655
22259462	22259962	AT1G60410	NA	1	22258981	22260715	3.39911	5.34281	22259462	22259962	AT1G60370	Yes	1	22244962	22245814	3.51226	7.59169	1088	1	22245409	22245909	+	132	interaction38916	14053	7	0.070445	1	1	0.070445	100	-0.454728	828	74	-7.57257	600	-2	NA	NA	NA	NA
24429591	24430091	AT1G65681	NA	1	24428874	24430670	2.26071	3.56043	24429591	24430091	AT1G65670	NA	1	24421992	24423953	1.52919	1.48264	981	1	24421560	24422060	+	77	interaction44754	8031	7	0.070445	1	1	0.070445	100	-0.454728	922	74	-7.57257	600	-2	NA	NA	-0.0877438	NA
26414005	26414505	AT1G70140	Yes	1	26412687	26415230	0.677484	6.52478	26414005	26414505	AT1G70130	Yes	1	26409742	26411801	0.677221	2.59635	1173	1	26410541	26411041	+	472	interaction50903	3464	26	0.070445	0	12	0.070445	1200	-21.0927	1054	304	-7.57193	1400	-24	-1.7413	1.96e-14	-2.67974	NA
29759407	29759907	AT1G79110	NA	1	29759156	29760704	0.807591	0.730678	29759407	29759907	AT1G79100	NA	1	29753647	29754388	0.752944	0.501744	388	1	29754083	29754583	+	84	interaction58114	5324	7	0.070445	1	1	0.070445	100	-0.454781	422	75	-7.57058	600	-2	0.0664915	0.85746	-1.14503	0.235347
13434466	13434966	AT2G31550	Yes	2	13433805	13435207	0.932729	1.64805	13434466	13434966	AT2G31510	NA	2	13416645	13421170	0.65932	0.386985	1217	2	13418834	13419334	+	110	interaction75345	15632	7	0.070445	1	1	0.070445	100	-0.454781	1215	75	-7.57058	600	-2	-1.59372	NA	-0.0414673	0.803496
7977584	7978084	AT1G22570	NA	1	7976619	7978573	1.24867	1.13229	7977584	7978084	AT1G22510	NA	1	7950817	7952832	0.633523	0.409564	1929	1	7951942	7952442	+	83	interaction15693	25642	7	0.070445	1	1	0.070445	100	-0.454833	1833	76	-7.56865	600	-2	0.512009	0.0842839	0.579074	0.0415928
22081450	22081950	AT1G59980	NA	1	22080788	22083651	0.730274	0.455996	22081450	22081950	AT1G59970	NA	1	22073533	22074876	0.79219	0.367428	1318	1	22074395	22074895	+	73	interaction38530	7055	7	0.070445	1	1	0.070445	100	-0.454833	1126	76	-7.56865	600	-2	-0.0434946	0.871418	0.569976	0.00926212
23136440	23136940	AT1G62510	NA	1	23136368	23137191	2.14647	3.09752	23136440	23136940	AT1G62450	NA	1	23115957	23117370	2.11801	2.34238	1162	1	23116012	23116512	+	80	interaction41074	20428	7	0.070445	1	1	0.070445	100	-0.454833	1207	76	-7.56865	600	-2	0.236202	0.592983	3.0688	NA
23937992	23938492	AT1G64440	NA	1	23937029	23939899	0.706977	0.465674	23937992	23938492	AT1G64400	NA	1	23915597	23919783	0.723435	0.509259	759	1	23919522	23920022	+	84	interaction43075	18470	7	0.070445	1	1	0.070445	100	-0.454833	647	76	-7.56865	600	-2	-0.392887	0.0385831	0.30463	0.342047
13328922	13329422	AT2G31270	NA	2	13329008	13331830	0.671241	0.449909	13328922	13329422	AT2G31260	Yes	2	13322020	13327400	0.762636	0.392784	89	2	13326143	13326643	+	542	interaction75164	2779	7	0.070445	1	1	0.070445	100	-0.454833	76	481	-7.56865	600	-2	-0.0915863	0.764634	0.0604262	0.693593
9290509	9291009	AT2G21780	NA	2	9291035	9291669	3.80849	3.69532	9290509	9291009	AT2G21730	Yes	2	9280043	9281623	1.47657	4.99706	62	2	9280895	9281395	+	972	interaction66943	9614	7	0.070445	1	1	0.070445	100	-0.454883	77	646	-7.56677	600	-2	0.995445	0.274118	-2.52864	1.14e-05
23501519	23502019	AT1G63360	NA	1	23499514	23502169	0.933043	1.14903	23501519	23502019	AT1G63300	Yes	1	23482192	23486220	0.569553	0.431247	783	1	23485492	23485992	+	102	interaction41955	16027	7	0.070445	1	1	0.070445	100	-0.454931	760	78	-7.56493	600	-2	-0.707978	5.76e-05	-0.154319	0.451574
13011445	13011945	AT2G30540	NA	2	13011104	13011784	0.911209	0.410327	13011445	13011945	AT2G30480	NA	2	12987095	12993403	0.645282	0.424874	2002	2	12986968	12987468	+	65	interaction74265	24477	7	0.070445	1	1	0.070445	100	-0.454931	1685	78	-7.56493	600	-2	0.364841	0.440107	-0.000855127	0.997512
15511950	15512450	AT2G36940	NA	2	15511785	15511987	0.572539	0.74777	15511950	15512450	AT2G36895	NA	2	15489027	15490347	0.661926	0.360009	93	2	15490117	15490617	+	1155	interaction80645	21833	7	0.070445	1	1	0.070445	100	-0.454931	78	1328	-7.56493	600	-2	NA	NA	-0.464333	2.08e-05
7575899	7576399	AT1G21610	NA	1	7573921	7578956	0.710057	0.447462	7575899	7576399	AT1G21590	NA	1	7566231	7569902	0.695164	0.403598	118	1	7569435	7569935	+	973	interaction14840	6464	7	0.070445	1	1	0.070445	100	-0.454979	79	1066	-7.56315	600	-2	0.238255	0.0518318	-0.7989	0.000545751
18503301	18503801	AT1G49970	NA	1	18501569	18504609	0.711618	0.361635	18503301	18503801	AT1G49950	NA	1	18494102	18497239	0.779941	0.335596	1324	1	18497077	18497577	+	78	interaction29381	6224	7	0.070445	1	1	0.070445	100	-0.454979	1157	79	-7.56315	600	-2	0.0977077	0.48532	0.0307809	0.880962
16892295	16892795	AT2G40450	NA	2	16892023	16892790	2.71487	5.64724	16892295	16892795	AT2G40420	NA	2	16877222	16879214	0.738895	0.516487	782	2	16877535	16878035	+	93	interaction82746	14760	7	0.070445	1	1	0.070445	100	-0.454979	635	79	-7.56315	600	-2	-1.95047	NA	0.413958	0.0486066
28041357	28041857	AT1G74650	NA	1	28041190	28042995	2.52735	2.17128	28041357	28041857	AT1G74640	NA	1	28032762	28034773	0.66337	0.383113	518	1	28034036	28034536	+	108	interaction54412	7321	7	0.070445	1	1	0.070445	100	-0.455025	538	80	-7.56141	600	-2	1.75181	4.33e-07	-0.55252	0.000471422
8656891	8657391	AT1G24420	NA	1	8656686	8657997	0.724488	0.8972	8656891	8657391	AT1G24400	Yes	1	8651406	8653828	1.70263	2.56178	1063	1	8652938	8653438	+	187	interaction17187	3953	15	0.070445	0	5	0.070445	500	-5.65691	844	137	-7.5599	1000	-10	-1.61076	0.000296267	-0.478491	0.0330638
2221479	2221979	AT1G07230	NA	1	2220252	2222982	0.644549	0.405884	2221479	2221979	AT1G07180	Yes	1	2204319	2206934	0.620056	0.990895	71	1	2204081	2204581	+	1133	interaction4595	17398	7	0.070445	1	1	0.070445	100	-0.455115	82	1018	-7.55806	600	-2	0.213783	0.116656	-0.902701	0.000310992
7028567	7029067	AT1G20290	NA	1	7025547	7029698	0.819809	1.24388	7028567	7029067	AT1G20260	NA	1	7016692	7020590	0.726815	0.411758	856	1	7019505	7020005	+	89	interaction13510	9062	7	0.070445	1	1	0.070445	100	-0.455115	807	82	-7.55806	600	-2	0.747547	NA	0.00951316	0.964086
24522691	24523191	AT1G65910	NA	1	24520790	24524164	3.4112	5.78582	24522691	24523191	AT1G65900	Yes	1	24515836	24518487	0.740246	1.84479	105	1	24518450	24518950	+	522	interaction45456	4241	7	0.070445	1	1	0.070445	100	-0.455115	82	478	-7.55806	600	-2	-0.364908	0.274462	-1.34598	5.25e-07
27877394	27877894	AT1G74140	Yes	1	27876904	27879780	1.24707	3.85648	27877394	27877894	AT1G74100	NA	1	27864344	27865694	0.546616	0.383377	1294	1	27864453	27864953	+	104	interaction53942	12941	7	0.070445	1	1	0.070445	100	-0.455115	1103	82	-7.55806	600	-2	-0.894504	NA	0.491325	0.162151
14207030	14207530	AT2G33540	NA	2	14203504	14208797	0.684731	0.356861	14207030	14207530	AT2G33510	Yes	2	14194149	14195647	1.24033	2.66716	104	2	14195020	14195520	+	596	interaction77584	12010	7	0.070445	1	1	0.070445	100	-0.455115	82	645	-7.55806	600	-2	-0.103511	0.570692	-0.105792	0.568569
4939093	4939593	AT1G14440	Yes	1	4938823	4940903	0.994069	1.29102	4939093	4939593	AT1G14420	Yes	1	4931565	4933515	0.60061	1.75187	144	1	4933077	4933577	+	1690	interaction10274	6016	15	0.070445	0	5	0.070445	500	-5.65657	138	1601	-7.55765	1000	-10	-0.173833	0.490367	-0.575126	0.672283
6992545	6993045	AT1G20160	NA	1	6990783	6993972	0.657234	0.602381	6992545	6993045	AT1G20130	Yes	1	6977752	6980241	2.00568	2.71786	142	1	6977897	6978397	+	607	interaction13385	14648	7	0.070445	1	1	0.070445	100	-0.455158	83	493	-7.55645	600	-2	-0.290651	0.129765	0.293988	NA
21119997	21120497	AT1G56415	Yes	1	21119828	21120395	1.59151	2.25909	21119997	21120497	AT1G56380	NA	1	21101326	21102701	2.32238	4.19863	110	1	21101961	21102461	+	1404	interaction36172	18036	7	0.070445	1	1	0.070445	100	-0.455158	83	1153	-7.55645	600	-2	NA	NA	NA	NA
28696017	28696517	AT1G76490	NA	1	28695759	28698793	0.63364	0.439262	28696017	28696517	AT1G76440	NA	1	28682128	28683750	0.712827	0.632904	88	1	28682617	28683117	+	1554	interaction55702	13400	7	0.070445	1	1	0.070445	100	-0.455158	83	1350	-7.55645	600	-2	0.451622	0.00203784	0.10714	0.58217
4074576	4075076	AT1G12050	NA	1	4072751	4076207	0.855759	0.428239	4074576	4075076	AT1G12030	NA	1	4064666	4066341	3.21245	3.92898	97	1	4065138	4065638	+	1711	interaction7852	9438	13	0.070445	1.5e-05	4	0.070445	400	-4.02038	59	1452	-7.55585	900	-8	-0.191789	0.307705	1.4671	0.00121697
20338954	20339454	AT1G54450	NA	1	20336339	20339535	1.1614	0.918201	20338954	20339454	AT1G54445	NA	1	20332427	20332862	0.848852	0.471662	1212	1	20331052	20331552	+	41	interaction34128	7902	9	0.070445	0.152232	2	0.070445	200	-1.33109	1159	25	-7.55534	700	-4	0.233263	0.310727	NA	NA
4670415	4670915	AT1G13630	NA	1	4669783	4672957	0.866526	0.5029	4670415	4670915	AT1G13605	NA	1	4658537	4659106	1.78871	1.75116	92	1	4658527	4659027	+	707	interaction9340	11888	7	0.070445	1	1	0.070445	100	-0.4552	84	694	-7.55488	600	-2	0.402264	0.0565606	NA	NA
17692295	17692795	AT1G47980	NA	1	17691833	17693867	3.4679	3.72884	17692295	17692795	AT1G47970	NA	1	17687268	17688816	0.722984	0.368075	214	1	17688074	17688574	+	110	interaction27877	4221	7	0.070445	1	1	0.070445	100	-0.4552	141	84	-7.55488	600	-2	-0.962804	0.544193	-0.11807	0.504789
17117927	17118427	AT2G41020	NA	2	17117262	17121119	0.718412	0.368778	17117927	17118427	AT2G40990	Yes	2	17105096	17106773	1.54375	2.91556	122	2	17106114	17106614	+	1394	interaction83385	11813	7	0.070445	1	1	0.070445	100	-0.4552	84	1127	-7.55488	600	-2	0.0739007	0.642624	NA	NA
4561046	4561546	AT1G13310	Yes	1	4561067	4563061	0.917656	4.63232	4561046	4561546	AT1G13300	NA	1	4556891	4558708	2.72422	4.38739	196	1	4557639	4558139	+	1285	interaction9183	3407	35	0.070445	0	19	0.070445	1900	-41.3044	158	1200	-7.55364	1600	-36	-1.70631	0.104898	-0.220844	0.198438
19686980	19687480	AT1G52870	NA	1	19685744	19687907	0.712888	0.428205	19686980	19687480	AT1G52830	NA	1	19672495	19673644	2.48953	3.43224	73	1	19673356	19673856	+	672	interaction32538	13624	7	0.070445	1	1	0.070445	100	-0.455241	85	602	-7.55334	600	-2	-0.807097	6.18e-13	1.96577	0.0188516
8303844	8304344	AT2G19146	NA	2	8304028	8304455	2.01633	1.55725	8303844	8304344	AT2G19130	Yes	2	8293681	8296275	1.00311	1.42693	1142	2	8295440	8295940	+	103	interaction65947	8404	7	0.070445	1	1	0.070445	100	-0.455358	803	88	-7.54896	600	-2	-1.22176	NA	-0.0801501	0.680936
11936413	11936913	AT2G28040	Yes	2	11936053	11937401	0.645206	0.946005	11936413	11936913	AT2G28000	NA	2	11926448	11929389	0.678704	0.50744	1538	2	11926021	11926521	+	69	interaction71393	10392	7	0.070445	1	1	0.070445	100	-0.455358	1151	88	-7.54896	600	-2	1.09154	0.000410154	-0.0599264	0.806897
7491994	7492494	AT1G21395	NA	1	7491964	7492339	1.78632	0.604588	7491994	7492494	AT1G21360	NA	1	7481251	7483507	2.29837	3.31624	845	1	7482469	7482969	+	98	interaction14565	9525	7	0.070445	1	1	0.070445	100	-0.455396	828	89	-7.54756	600	-2	1.7014	NA	0.0233774	0.942129
3407481	3407981	AT1G10390	NA	1	3407023	3412843	0.793486	0.513037	3407481	3407981	AT1G10380	Yes	1	3400605	3402324	1.83873	3.08968	136	1	3401802	3402302	+	442	interaction6436	5679	7	0.070445	1	1	0.070445	100	-0.455432	90	423	-7.5462	600	-2	0.19457	0.136535	-0.462127	0.0402083
17831521	17832021	AT2G42850	Yes	2	17831654	17833432	0.757918	0.73674	17831521	17832021	AT2G42820	NA	2	17817337	17818545	1.96455	3.51022	1142	2	17817010	17817510	+	98	interaction85347	14511	7	0.070445	1	1	0.070445	100	-0.455432	1080	90	-7.5462	600	-2	-0.355725	0.43141	-0.0444713	0.932494
4872984	4873484	AT1G14260	NA	1	4872855	4874907	0.721921	0.470603	4872984	4873484	AT1G14240	Yes	1	4864901	4868000	2.0031	3.14945	115	1	4865359	4865859	+	926	interaction10146	7625	7	0.070445	1	1	0.070445	100	-0.455468	91	832	-7.54487	600	-2	-0.680453	0.0276368	-0.475739	0.0379675
24909644	24910144	AT1G66780	Yes	1	24909212	24911485	2.55491	5.44346	24909644	24910144	AT1G66750	NA	1	24894714	24897253	0.665148	0.306323	1736	1	24896495	24896995	+	103	interaction47248	13149	7	0.070445	1	1	0.070445	100	-0.455468	1301	91	-7.54487	600	-2	-0.238764	0.923187	0.055268	0.791694
12523174	12523674	AT2G29125	NA	2	12523341	12524109	2.89836	5.30966	12523174	12523674	AT2G29120	NA	2	12511291	12515895	2.1711	2.49852	394	2	12513055	12513555	+	97	interaction72837	10119	7	0.070445	1	1	0.070445	100	-0.455468	350	91	-7.54487	600	-2	-0.393044	0.143398	0.00250144	0.993959
9398580	9399080	AT1G27070	NA	1	9396657	9399453	0.562945	0.380745	9398580	9399080	AT1G27040	Yes	1	9386783	9390042	2.72729	4.9404	100	1	9389427	9389927	+	883	interaction18407	9153	7	0.070445	1	1	0.070445	100	-0.455503	92	798	-7.54357	600	-2	-0.0837025	0.65372	0.421269	0.811796
23386022	23386522	AT1G63070	NA	1	23385323	23387167	2.21823	3.77694	23386022	23386522	AT1G63050	NA	1	23375883	23378291	0.747137	0.561342	1270	1	23376472	23376972	+	124	interaction41679	9550	7	0.070445	1	1	0.070445	100	-0.455503	993	92	-7.54357	600	-2	2.23871	NA	-0.165242	0.388018
27522893	27523393	AT1G73190	NA	1	27521943	27523332	0.823016	0.84608	27522893	27523393	AT1G73170	NA	1	27511660	27514797	0.835604	0.422416	90	1	27514011	27514511	+	966	interaction53382	8882	7	0.070445	1	1	0.070445	100	-0.455503	92	847	-7.54357	600	-2	-1.54019	0.376175	-0.553441	0.000201387
4273800	4274300	AT1G12540	NA	1	4272959	4274206	2.41122	3.08332	4273800	4274300	AT1G12530	NA	1	4268985	4270787	0.891732	0.447297	305	1	4270050	4270550	+	139	interaction8518	3750	7	0.070445	1	1	0.070445	100	-0.455571	232	94	-7.54105	600	-2	NA	NA	-0.125473	0.434907
24478477	24478977	AT1G65810	Yes	1	24477042	24480728	0.962739	1.28767	24478477	24478977	AT1G65790	Yes	1	24468931	24472329	1.63894	3.39407	182	1	24472032	24472532	+	787	interaction45235	6445	7	0.070445	1	1	0.070445	100	-0.455571	94	587	-7.54105	600	-2	-3.44184	NA	-1.18344	0.0367871
895430	895930	AT1G03590	NA	1	894253	897518	0.585652	0.596891	895430	895930	AT1G03560	NA	1	890155	892410	0.605737	0.331127	91	1	891503	892003	+	760	interaction1905	3927	7	0.070445	1	1	0.070445	100	-0.455603	95	722	-7.53983	600	-2	0.116349	0.634834	0.545073	0.00465398
3876064	3876564	AT1G11540	Yes	1	3875441	3877155	0.755185	1.20886	3876064	3876564	AT1G11480	Yes	1	3864152	3866969	0.758383	0.426998	148	1	3866897	3867397	+	714	interaction7314	9167	7	0.070445	1	1	0.070445	100	-0.455603	95	728	-7.53983	600	-2	-0.027721	0.962456	0.320829	0.00746429
10386105	10386605	AT1G29700	NA	1	10384980	10387441	0.749839	0.321839	10386105	10386605	AT1G29680	NA	1	10377789	10378961	1.0641	1.04067	146	1	10377929	10378429	+	928	interaction20951	8176	7	0.070445	1	1	0.070445	100	-0.455603	95	1027	-7.53983	600	-2	-0.560878	1.61e-09	0.747547	NA
12318502	12319002	AT2G28700	NA	2	12317165	12318746	1.90627	1.30378	12318502	12319002	AT2G28680	NA	2	12302962	12304799	3.21066	4.25936	974	2	12303441	12303941	+	97	interaction71940	15061	7	0.070445	1	1	0.070445	100	-0.455603	921	95	-7.53983	600	-2	0.708028	0.313485	2.6163	NA
17305009	17305509	AT2G41500	NA	2	17304129	17307426	0.679116	0.460089	17305009	17305509	AT2G41473	Yes	2	17294452	17294728	1.18184	1.21156	100	2	17294241	17294741	+	787	interaction84052	10768	7	0.070445	1	1	0.070445	100	-0.455603	95	581	-7.53983	600	-2	0.319547	0.00671567	NA	NA
11356122	11356622	AT1G31720	NA	1	11356101	11357081	3.04388	2.8389	11356122	11356622	AT1G31690	NA	1	11343979	11347767	3.1665	3.42435	406	1	11346497	11346997	+	120	interaction22678	9625	7	0.070445	1	1	0.070445	100	-0.455698	376	98	-7.53633	600	-2	-0.652565	0.0922294	-0.489736	0.331726
10806513	10807013	AT2G25370	NA	2	10806679	10809945	1.85928	1.58993	10806513	10807013	AT2G25360	Yes	2	10804248	10805761	1.8947	1.84538	129	2	10804665	10805165	+	434	interaction69472	1848	7	0.070445	1	1	0.070445	100	-0.455698	98	310	-7.53633	600	-2	NA	NA	NA	NA
7981438	7981938	AT2G18370	NA	2	7980624	7981758	2.73665	3.80456	7981438	7981938	AT2G18328	NA	2	7964392	7964909	1.12906	0.637069	1407	2	7963945	7964445	+	130	interaction64942	17493	7	0.070445	1	1	0.070445	100	-0.455728	1170	99	-7.53521	600	-2	-0.605249	0.00834461	-0.986979	0.000305889
17491587	17492087	AT2G41900	NA	2	17490404	17493922	0.657536	0.351907	17491587	17492087	AT2G41870	Yes	2	17470865	17472936	1.0933	1.54634	153	2	17472475	17472975	+	1076	interaction84453	19112	7	0.070445	1	1	0.070445	100	-0.455728	99	1160	-7.53521	600	-2	-0.332417	0.0145046	-1.19179	9.53e-10
17005382	17005882	AT1G44980	NA	1	17004255	17005923	0.754825	0.4909	17005382	17005882	AT1G44960	NA	1	16999537	17001729	0.646201	0.404514	176	1	16999197	16999697	+	460	interaction26496	6185	7	0.070445	1	1	0.070445	100	-0.455786	101	384	-7.53304	600	-2	NA	NA	0.130041	0.451407
24950475	24950975	AT1G66880	NA	1	24946927	24955611	0.796085	0.639481	24950475	24950975	AT1G66870	NA	1	24945483	24946968	2.02257	1.77797	120	1	24945635	24946135	+	1091	interaction47564	4840	7	0.070445	1	1	0.070445	100	-0.455786	101	1012	-7.53304	600	-2	0.275969	0.367286	-0.908093	NA
14604970	14605470	AT2G34660	NA	2	14602469	14612565	0.713471	0.442976	14604970	14605470	AT2G34650	NA	2	14589759	14591788	0.463947	0.678646	130	2	14591081	14591581	+	851	interaction78488	13889	7	0.070445	1	1	0.070445	100	-0.455786	101	764	-7.53304	600	-2	-0.356981	0.00375923	0.0832246	0.755641
5577954	5578454	AT1G16310	Yes	1	5578430	5580693	0.870731	1.39337	5577954	5578454	AT1G16290	Yes	1	5570752	5573538	1.07899	1.14034	671	1	5570993	5571493	+	191	interaction11369	6961	7	0.070445	1	1	0.070445	100	-0.455815	635	102	-7.53199	600	-2	-0.67925	0.00235807	-0.195423	NA
27158030	27158530	AT1G72175	NA	1	27157874	27159558	0.597752	0.292424	27158030	27158530	AT1G72120	Yes	1	27132096	27133985	0.910615	2.57957	115	1	27132029	27132529	+	1497	interaction52687	26001	7	0.070445	1	1	0.070445	100	-0.455815	102	1566	-7.53199	600	-2	0.368487	0.0821284	0.0551539	0.91267
626583	627083	AT1G02840	NA	1	626740	629819	0.708385	0.418084	626583	627083	AT1G02790	Yes	1	610390	612324	2.35096	3.91119	1134	1	610917	611417	+	134	interaction1543	15666	7	0.070445	1	1	0.070445	100	-0.455843	1273	103	-7.53096	600	-2	0.19352	0.0793398	NA	NA
25048458	25048958	AT1G67090	NA	1	25048157	25049424	1.03313	0.532136	25048458	25048958	AT1G67040	NA	1	25019104	25022542	0.587469	0.432033	1822	1	25019063	25019563	+	158	interaction47942	29395	7	0.070445	1	1	0.070445	100	-0.455843	1787	103	-7.53096	600	-2	-0.496674	0.000546419	-0.0312236	0.902214
13886914	13887414	AT2G32740	NA	2	13886825	13888232	0.910271	0.477794	13886914	13887414	AT2G32730	NA	2	13880045	13885736	0.807576	0.45163	1058	2	13879975	13880475	+	86	interaction76633	6939	7	0.070445	1	1	0.070445	100	-0.455843	1041	103	-7.53096	600	-2	0.442804	0.675851	0.149822	0.457398
2716330	2716830	AT1G08580	NA	1	2715078	2716404	0.781426	0.456052	2716330	2716830	AT1G08560	NA	1	2709631	2710912	0.650784	0.43881	468	1	2710391	2710891	+	107	interaction5245	5939	7	0.070445	1	1	0.070445	100	-0.45587	447	104	-7.52995	600	-2	-0.0531258	0.786264	-0.371175	0.0345324
19554428	19554928	AT1G52470	NA	1	19553212	19555543	2.48127	3.44094	19554428	19554928	AT1G52460	NA	1	19549330	19551282	2.6233	3.39648	122	1	19550863	19551363	+	726	interaction32269	3565	7	0.070445	1	1	0.070445	100	-0.455897	105	610	-7.52895	600	-2	0.747547	NA	NA	NA
12261491	12261991	AT1G33800	Yes	1	12261418	12262717	0.662383	1.62441	12261491	12261991	AT1G33790	NA	1	12256663	12260605	1.03234	0.871853	134	1	12256448	12256948	+	1311	interaction23932	5043	21	0.070445	0	9	0.070445	900	-13.9947	99	1209	-7.52614	1200	-18	-0.272327	0.178012	2.00177	2.19e-12
17306058	17306558	AT2G41500	NA	2	17304129	17307426	0.679116	0.460089	17306058	17306558	AT2G41480	NA	2	17296811	17298731	1.47537	1.28241	72	2	17297948	17298448	+	1851	interaction84056	8110	13	0.070445	1.2e-05	4	0.070445	400	-4.01757	62	1825	-7.52563	900	-8	0.319547	0.00671567	0.413996	0.210337
10898516	10899016	AT1G30720	Yes	1	10898171	10899912	2.30267	3.35348	10898516	10899016	AT1G30700	Yes	1	10892569	10894572	2.04951	2.23465	141	1	10892105	10892605	+	351	interaction21758	6411	7	0.070445	1	1	0.070445	100	-0.455999	109	468	-7.52518	600	-2	1.68744	0.00535089	1.2275	1.14e-09
19281896	19282396	AT1G51900	NA	1	19279883	19282895	3.64382	5.46866	19281896	19282396	AT1G51870	Yes	1	19262878	19267001	2.58914	4.84401	1480	1	19266037	19266537	+	131	interaction31381	15859	7	0.070445	1	1	0.070445	100	-0.456023	1262	110	-7.52428	600	-2	NA	NA	-1.2138	0.0973967
9439621	9440121	AT1G27180	NA	1	9439858	9446106	0.755866	0.463838	9439621	9440121	AT1G27150	Yes	1	9429046	9432274	0.782638	0.550857	732	1	9431098	9431598	+	144	interaction18521	8523	7	0.070445	1	1	0.070445	100	-0.456047	712	111	-7.52339	600	-2	-0.0703732	0.774853	-0.0658159	0.716884
11764045	11764545	AT2G27530	NA	2	11763216	11764845	0.618205	0.413892	11764045	11764545	AT2G27460	NA	2	11740633	11745011	0.651539	0.444939	1330	2	11740567	11741067	+	114	interaction70978	23478	7	0.070445	1	1	0.070445	100	-0.456047	1387	111	-7.52339	600	-2	-0.041844	0.830585	0.261931	0.0687121
24039021	24039521	AT1G64690	NA	1	24038033	24039177	0.668978	0.576835	24039021	24039521	AT1G64670	Yes	1	24030819	24033556	1.15639	3.29993	133	1	24033073	24033573	+	1081	interaction43434	5948	7	0.070445	1	1	0.070445	100	-0.456071	112	953	-7.52252	600	-2	-0.585116	0.00573415	0.0743259	0.627298
12369939	12370439	AT2G28830	NA	2	12366747	12370684	0.931674	0.987155	12369939	12370439	AT2G28790	NA	2	12354429	12355431	4.21697	5.20951	1166	2	12354448	12354948	+	137	interaction72183	15491	7	0.070445	1	1	0.070445	100	-0.456071	1303	112	-7.52252	600	-2	-0.0577765	0.792234	0.105325	0.512475
986004	986504	AT1G03880	NA	1	985750	988146	2.99876	3.76393	986004	986504	AT1G03870	NA	1	982505	983540	0.942757	0.591706	187	1	982523	983023	+	1001	interaction2378	3481	15	0.070445	0	5	0.070445	500	-5.65116	156	1080	-7.52242	1000	-10	NA	NA	1.42233	6.25e-07
1554563	1555063	AT2G04480	NA	2	1554281	1555514	1.5782	1.87886	1554563	1555063	AT2G04450	NA	2	1543319	1545462	0.670298	0.473143	781	2	1545005	1545505	+	44	interaction60845	9558	9	0.070445	0.160876	2	0.070445	200	-1.33107	530	26	-7.52185	700	-4	0.0790942	0.950384	-0.146475	0.838414
1635090	1635590	AT1G05520	Yes	1	1630899	1635711	0.775409	0.475287	1635090	1635590	AT1G05490	NA	1	1618601	1623452	0.604294	0.456413	1116	1	1620972	1621472	+	195	interaction3319	14118	7	0.070445	1	1	0.070445	100	-0.456094	1251	113	-7.52167	600	-2	0.291117	0.0241334	-0.711736	0.0426352
12264953	12265453	AT1G33810	NA	1	12265032	12266847	0.769809	0.559721	12264953	12265453	AT1G33790	NA	1	12256663	12260605	1.03234	0.871853	113	1	12257845	12258345	+	1041	interaction23944	7108	7	0.070445	1	1	0.070445	100	-0.456161	116	791	-7.5192	600	-2	-0.0775463	0.653253	2.00177	2.19e-12
19454893	19455393	AT1G52230	NA	1	19454835	19455668	0.580094	0.678756	19454893	19455393	AT1G52190	NA	1	19434508	19438971	1.56544	1.32867	1152	1	19436596	19437096	+	134	interaction32088	18297	7	0.070445	1	1	0.070445	100	-0.456182	1311	117	-7.51841	600	-2	-0.459752	6.55e-05	-0.0623292	0.825926
17785473	17785973	AT2G42720	Yes	2	17785408	17787421	1.60889	1.74052	17785473	17785973	AT2G42680	NA	2	17774902	17776320	0.475197	0.38281	987	2	17774875	17775375	+	117	interaction85079	10598	7	0.070445	1	1	0.070445	100	-0.456224	1067	119	-7.51686	600	-2	-0.286492	0.623363	0.203972	0.0811181
6303473	6303973	AT1G18310	Yes	1	6301199	6303956	0.860645	3.82811	6303473	6303973	AT1G18280	NA	1	6294332	6295364	1.39948	0.751793	158	1	6294348	6294848	+	552	interaction12310	9125	7	0.070445	1	1	0.070445	100	-0.456245	120	651	-7.51611	600	-2	-1.84942	NA	0.645245	0.357594
28223058	28223558	AT1G75200	NA	1	28220625	28223709	0.640859	0.394521	28223058	28223558	AT1G75160	NA	1	28209436	28211804	2.03071	1.75263	114	1	28209933	28210433	+	679	interaction54926	13125	7	0.070445	1	1	0.070445	100	-0.456245	120	682	-7.51611	600	-2	0.466411	0.000973232	0.296259	0.702922
13722180	13722680	AT2G32300	Yes	2	13722426	13723590	0.435281	0.805618	13722180	13722680	AT2G32295	NA	2	13719297	13722179	0.716503	0.353893	384	2	13720053	13720553	+	142	interaction75931	2127	7	0.070445	1	1	0.070445	100	-0.456245	361	120	-7.51611	600	-2	-0.390165	0.106781	-0.558938	0.00304811
21187895	21188395	AT1G56550	Yes	1	21185661	21188369	1.57116	4.25881	21187895	21188395	AT1G56510	Yes	1	21167588	21173632	0.863248	1.12802	1713	1	21173489	21173989	+	152	interaction36390	14406	7	0.070445	1	1	0.070445	100	-0.456265	1759	121	-7.51537	600	-2	-0.298354	0.171866	-0.0546982	0.914419
24942372	24942872	AT1G66860	NA	1	24942187	24944497	1.82415	1.6541	24942372	24942872	AT1G66830	Yes	1	24930664	24932918	0.603669	0.626703	1016	1	24930919	24931419	+	164	interaction47466	11453	7	0.070445	1	1	0.070445	100	-0.456265	782	121	-7.51537	600	-2	-1.08787	0.0980169	-0.186051	0.711188
29187014	29187514	AT1G77660	NA	1	29185898	29187825	0.668819	0.631874	29187014	29187514	AT1G77620	NA	1	29167763	29172867	0.718047	0.435421	1517	1	29172421	29172921	+	117	interaction56404	14593	7	0.070445	1	1	0.070445	100	-0.456265	1650	121	-7.51537	600	-2	0.0992896	0.748369	-0.0532177	0.834341
3869538	3870038	AT1G11490	Yes	1	3868883	3870065	0.901403	3.02882	3869538	3870038	AT1G11480	Yes	1	3864152	3866969	0.758383	0.426998	1617	1	3864128	3864628	+	147	interaction7244	5410	7	0.070445	1	1	0.070445	100	-0.456285	1048	122	-7.51464	600	-2	-0.565999	0.505816	0.320829	0.00746429
11457560	11458060	AT2G26870	NA	2	11457007	11459365	2.4134	2.23834	11457560	11458060	AT2G26840	NA	2	11447196	11448949	0.753451	0.448762	147	2	11448028	11448528	+	767	interaction70396	9532	7	0.070445	1	1	0.070445	100	-0.456304	123	741	-7.51393	600	-2	0.309637	0.125122	-0.315303	0.101804
14690049	14690549	AT2G34820	NA	2	14689623	14690879	4.17975	5.9871	14690049	14690549	AT2G34790	NA	2	14673839	14677270	1.74592	1.83194	813	2	14674038	14674538	+	167	interaction78600	16011	7	0.070445	1	1	0.070445	100	-0.456304	723	123	-7.51393	600	-2	0.747547	NA	0.599093	0.128854
14496971	14497471	AT2G34355	NA	2	14496327	14498389	0.759211	0.441999	14496971	14497471	AT2G34320	Yes	2	14484958	14485837	1.47431	2.7717	115	2	14485030	14485530	+	1489	interaction78097	11941	7	0.070445	1	1	0.070445	100	-0.456361	126	1235	-7.51185	600	-2	0.706273	0.000545751	-2.23194	NA
14510999	14511499	AT2G34370	NA	2	14510481	14511891	2.34583	3.28578	14510999	14511499	AT2G34355	NA	2	14496327	14498389	0.759211	0.441999	1317	2	14497043	14497543	+	115	interaction78192	13956	7	0.070445	1	1	0.070445	100	-0.456361	1025	126	-7.51185	600	-2	-0.862446	NA	0.706273	0.000545751
699879	700379	AT2G02570	NA	2	697950	700917	0.674418	0.414245	699879	700379	AT2G02540	NA	2	683646	685309	2.77416	3.19915	114	2	684402	684902	+	718	interaction59669	15477	7	0.070445	1	1	0.070445	100	-0.456379	127	636	-7.51118	600	-2	0.0222794	0.916303	0.0134104	0.973708
17404005	17404505	AT2G41720	NA	2	17403602	17407135	0.746759	0.348739	17404005	17404505	AT2G41705	NA	2	17397273	17400081	0.7352	0.420898	144	2	17396955	17397455	+	505	interaction84268	7050	7	0.070445	1	1	0.070445	100	-0.456379	127	648	-7.51118	600	-2	-0.121124	0.53784	0.0263226	0.893149
4273604	4274104	AT1G12540	NA	1	4272959	4274206	2.41122	3.08332	4273604	4274104	AT1G12500	NA	1	4263149	4265044	0.535917	0.385108	1133	1	4263511	4264011	+	146	interaction8506	10093	7	0.070445	1	1	0.070445	100	-0.456397	991	128	-7.51052	600	-2	NA	NA	-0.15073	0.47686
11515957	11516457	AT2G26980	NA	2	11514702	11518734	0.613632	0.369124	11515957	11516457	AT2G26940	NA	2	11496517	11497378	2.44173	1.90535	149	2	11496538	11497038	+	1425	interaction70517	19419	7	0.070445	1	1	0.070445	100	-0.456397	128	1108	-7.51052	600	-2	-0.143838	0.279118	1.12447	NA
4857007	4857507	AT1G14210	NA	1	4856777	4857964	0.610929	0.376385	4857007	4857507	AT1G14185	Yes	1	4850273	4852096	0.740552	1.15038	124	1	4850950	4851450	+	1018	interaction9981	6057	7	0.070445	1	1	0.070445	100	-0.456415	129	787	-7.50987	600	-2	0.395646	0.0101975	-0.213095	0.456339
11198533	11199033	AT2G26300	NA	2	11196995	11201102	0.775338	0.486791	11198533	11199033	AT2G26280	NA	2	11187732	11191337	0.802545	0.405667	772	2	11190032	11190532	+	132	interaction70009	8501	7	0.070445	1	1	0.070445	100	-0.456415	632	129	-7.50987	600	-2	0.343009	0.00234141	-0.403619	6.93e-06
11938620	11939120	AT2G28050	NA	2	11938264	11939653	0.890098	0.42681	11938620	11939120	AT2G28010	Yes	2	11930578	11931769	2.85775	6.16892	158	2	11930640	11931140	+	1101	interaction71421	7980	7	0.070445	1	1	0.070445	100	-0.456415	129	754	-7.50987	600	-2	0.659196	0.00179762	NA	NA
12694444	12694944	AT2G29690	NA	2	12693870	12696975	0.712097	0.394693	12694444	12694944	AT2G29630	NA	2	12666934	12670311	0.744371	0.474247	2082	2	12667407	12667907	+	145	interaction73473	27037	7	0.070445	1	1	0.070445	100	-0.456415	1845	129	-7.50987	600	-2	-0.0169943	0.939978	-0.270058	0.11558
19761490	19761990	AT1G53035	NA	1	19761699	19762551	0.585183	0.408907	19761490	19761990	AT1G53023	Yes	1	19754213	19755843	1.66961	5.615	146	1	19754919	19755419	+	1115	interaction32785	6571	7	0.070445	1	1	0.070445	100	-0.456449	131	1035	-7.5086	600	-2	-0.36743	0.335681	NA	NA
122930	123430	AT1G01320	NA	1	121066	130577	0.763976	0.419817	122930	123430	AT1G01310	NA	1	120153	121130	0.319197	0.333202	137	1	120053	120553	+	608	interaction201	2877	7	0.070445	1	1	0.070445	100	-0.456466	132	628	-7.50798	600	-2	-0.684542	1.79e-05	0.429924	NA
12330943	12331443	AT1G33940	Yes	1	12330575	12332785	1.26087	2.00299	12330943	12331443	AT1G33900	NA	1	12311517	12313518	1.83889	3.42226	156	1	12312074	12312574	+	1113	interaction24600	18869	7	0.070445	1	1	0.070445	100	-0.456466	132	919	-7.50798	600	-2	-1.17601	NA	3.65423	NA
21716480	21716980	AT1G58440	NA	1	21713841	21717290	0.650639	0.414833	21716480	21716980	AT1G58400	NA	1	21696164	21699118	1.24071	1.10909	1746	1	21696976	21697476	+	195	interaction37465	19504	7	0.070445	1	1	0.070445	100	-0.456466	1544	132	-7.50798	600	-2	0.317639	0.0505904	0.700747	8.73e-05
4462632	4463132	AT1G13090	Yes	1	4461805	4463543	0.812106	0.602464	4462632	4463132	AT1G13080	Yes	1	4459165	4460940	0.58608	1.98237	675	1	4459921	4460421	+	130	interaction9035	2711	7	0.070445	1	1	0.070445	100	-0.456499	689	134	-7.50677	600	-2	-0.402508	0.0123559	-2.35489	6.03e-44
16911005	16911505	AT2G40480	NA	2	16910363	16912592	0.570004	0.336316	16911005	16911505	AT2G40470	NA	2	16902303	16903652	3.5829	6.12333	152	2	16903068	16903568	+	831	interaction82867	7937	7	0.070445	1	1	0.070445	100	-0.456515	135	622	-7.50617	600	-2	-0.369621	0.0171342	-0.163562	0.771116
3711539	3712039	AT1G11110	Yes	1	3710207	3712503	0.627593	1.03362	3711539	3712039	AT1G11070	Yes	1	3690211	3693648	0.751842	0.666597	190	1	3693431	3693931	+	1647	interaction7032	18108	7	0.070445	1	1	0.070445	100	-0.456578	139	1473	-7.50389	600	-2	1.27395	NA	-0.123729	0.716452
24813429	24813929	AT1G66510	NA	1	24812836	24816620	0.646296	0.466464	24813429	24813929	AT1G66460	Yes	1	24789734	24791988	0.985783	2.03271	118	1	24791031	24791531	+	2081	interaction46941	22398	7	0.070445	1	1	0.070445	100	-0.456593	140	1590	-7.50334	600	-2	0.148456	0.405826	-0.980949	0.0128286
29614439	29614939	AT1G78750	Yes	1	29613121	29614695	2.01767	3.02586	29614439	29614939	AT1G78710	NA	1	29601252	29604557	1.50028	1.08213	1368	1	29602986	29603486	+	126	interaction57552	11453	7	0.070445	1	1	0.070445	100	-0.456607	1306	141	-7.5028	600	-2	1.03214	0.0105526	0.596515	4.45e-06
6411453	6411953	AT1G18620	NA	1	6409977	6414451	0.680008	0.399996	6411453	6411953	AT1G18610	NA	1	6405644	6409297	0.653646	0.411441	174	1	6405920	6406420	+	438	interaction12407	5533	7	0.070445	1	1	0.070445	100	-0.456622	142	505	-7.50227	600	-2	-0.275743	0.0263911	-0.140666	0.424381
24709174	24709674	AT1G66280	NA	1	24706511	24709785	2.67134	3.20612	24709174	24709674	AT1G66270	NA	1	24699989	24703041	3.62397	5.11784	626	1	24701063	24701563	+	155	interaction46216	8111	7	0.070445	1	1	0.070445	100	-0.456719	516	149	-7.49874	600	-2	0.80597	0.00111192	0.72596	0.00348916
17997949	17998449	AT2G43320	NA	2	17996649	17999927	0.685516	0.30454	17997949	17998449	AT2G43270	Yes	2	17988206	17989491	3.03546	3.86116	97	2	17988899	17989399	+	1360	interaction85690	9050	13	0.070445	1.5e-05	4	0.070445	400	-4.01502	65	1295	-7.49852	900	-8	0.064097	0.764377	2.93844	0.113244
10887034	10887534	AT2G25570	NA	2	10884965	10887921	0.69516	0.437698	10887034	10887534	AT2G25540	Yes	2	10866821	10872077	0.866777	0.777697	161	2	10871542	10872042	+	1393	interaction69607	15492	7	0.070445	1	1	0.070445	100	-0.456732	150	1273	-7.49826	600	-2	0.0706336	0.737248	-1.22757	0.47225
18216512	18217012	AT2G44010	NA	2	18216683	18217438	1.86664	1.16411	18216512	18217012	AT2G44000	NA	2	18214323	18215571	0.774474	0.668156	196	2	18213922	18214422	+	173	interaction86147	2590	7	0.070445	1	1	0.070445	100	-0.456745	226	151	-7.49779	600	-2	0.193119	0.481552	-0.0258679	0.988098
3888952	3889452	AT1G11580	NA	1	3888689	3890811	2.81253	5.0374	3888952	3889452	AT1G11510	Yes	1	3871777	3872836	1.62354	6.33118	2095	1	3872025	3872525	+	179	interaction7459	16927	7	0.070445	1	1	0.070445	100	-0.456757	1643	152	-7.49732	600	-2	0.511508	0.0176238	NA	NA
26829563	26830063	AT1G71160	Yes	1	26828700	26830208	2.09727	4.351	26829563	26830063	AT1G71150	Yes	1	26827145	26828674	1.21917	4.18546	681	1	26827975	26828475	+	184	interaction51955	1588	24	0.070445	0	11	0.070445	1100	-18.7886	425	126	-7.49565	1300	-22	NA	NA	-3.58263	NA
11554056	11554556	AT1G32120	NA	1	11552925	11558777	0.678242	0.382907	11554056	11554556	AT1G32100	NA	1	11546337	11547994	2.33383	2.15139	194	1	11547987	11548487	+	854	interaction23256	6069	7	0.070445	1	1	0.070445	100	-0.456807	156	856	-7.49553	600	-2	-0.142891	0.67873	-0.0356553	0.935261
16865600	16866100	AT1G44542	NA	1	16864969	16866605	1.85025	1.45027	16865600	16866100	AT1G44478	NA	1	16852340	16853238	1.38597	1.45465	680	1	16852870	16853370	+	177	interaction26196	12730	7	0.070445	1	1	0.070445	100	-0.456853	568	160	-7.49382	600	-2	0.891194	0.596408	-0.632208	NA
27170040	27170540	AT1G72200	NA	1	27169794	27171321	1.35705	1.67449	27170040	27170540	AT1G72140	NA	1	27141813	27144490	2.97788	4.93955	878	1	27142481	27142981	+	200	interaction52688	27559	7	0.070445	1	1	0.070445	100	-0.456865	1001	161	-7.49341	600	-2	-0.725389	0.000128124	0.894545	0.000866332
[truncated: 606 more rows]
