# Supplementary material for: Polycomb-dependent differential chromatin compartmentalization determines gene coregulation in Arabidopsis
Source: HighWire-hosted journal article supplement (doi:10.1101/gr.273771.120), 2021-06-03
Supplement: Supplemental_Table_S16.xlsx [file Supplemental_Table_S16.xlsx]

## Sheet: S16
Supplementary Table S16: C-Hi-C_ref6_Fig4E
hyper ref6 and "ref6 loop"							hypo ref6 and "ref6 loop"
Gene	#'chr'	'start'	'end'	ref6	Col0		Gene	#'chr'	'start'	'end'	ref6	Col0
AT1G01010	Chr1	3630	5899	1.60873	0.519221		AT1G03790	Chr1	954524	956097	3.74963	4.36279
AT1G01400	Chr1	150688	152210	2.60715	1.45163		AT1G18280	Chr1	6294332	6295364	1.15649	2.05786
AT1G01640	Chr1	230993	232508	1.50586	0.774722		AT1G24010	Chr1	8498802	8499499	2.39944	3.48169
AT1G01660	Chr1	240056	242608	2.33044	0.628937		AT1G25280	Chr1	8863776	8866805	0.758206	0.783262
AT1G01670	Chr1	242842	245988	3.20449	1.64425		AT1G30650	Chr1	10868302	10871297	2.57084	3.65477
AT1G01680	Chr1	246410	248367	3.5895	1.7443		AT1G32172	Chr1	11578505	11580547	2.66097	3.10176
AT1G02210	Chr1	427547	427811	2.72892	1.73193		AT1G32450	Chr1	11715149	11719970	1.38861	1.95885
AT1G02220	Chr1	428813	430647	2.56082	0.750769		AT1G35210	Chr1	12896651	12897402	1.75978	3.30473
AT1G02230	Chr1	435173	436776	2.80375	0.721096		AT1G47980	Chr1	17691833	17693867	2.59672	3.92139
AT1G02250	Chr1	437950	439559	3.38119	0.851709		AT1G49300	Chr1	18234723	18237543	0.866486	1.33983
AT1G02260	Chr1	440440	442877	2.24226	0.621453		AT1G52990	Chr1	19740502	19743449	1.24994	2.3017
AT1G02380	Chr1	476999	478971	1.60162	0.831792		AT1G59530	Chr1	21868261	21868708	1.29365	2.02993
AT1G02500	Chr1	518250	520437	0.842424	0.695015		AT1G62510	Chr1	23136368	23137191	2.44554	3.0884
AT1G02510	Chr1	520497	521668	2.36371	0.669508		AT1G62570	Chr1	23169135	23172105	1.30039	2.38702
AT1G02520	Chr1	523650	528745	1.59323	0.428956		AT1G62660	Chr1	23199717	23203765	1.23731	1.64461
AT1G02530	Chr1	529794	534677	1.55871	0.442661		AT1G62700	Chr1	23216217	23217916	3.83314	4.20621
AT1G02550	Chr1	536482	537211	3.62281	2.4495		AT1G62710	Chr1	23223873	23226916	1.77346	2.98782
AT1G02630	Chr1	560609	562424	1.7482	0.822004		AT1G63710	Chr1	23632177	23633942	1.46319	2.68065
AT1G02980	Chr1	677868	681310	1.42696	1.01604		AT1G64620	Chr1	24006991	24008694	3.09396	3.24017
AT1G03660	Chr1	911435	911759	1.36538	0.800036		AT1G65490	Chr1	24354770	24355351	1.73273	2.62823
AT1G03670	Chr1	914221	916222	2.95911	0.55575		AT1G65500	Chr1	24357866	24358616	3.07172	4.29356
AT1G03810	Chr1	958758	959609	3.08712	2.99785		AT1G65510	Chr1	24359452	24360081	0.80139	1.80978
AT1G03820	Chr1	959868	960728	2.53972	2.20414		AT1G65520	Chr1	24361031	24361993	0.523266	0.871697
AT1G04110	Chr1	1061456	1063784	2.46185	0.629714		AT1G65985	Chr1	24562552	24568530	1.75755	3.07486
AT1G04120	Chr1	1064449	1071047	0.884805	0.656285		AT1G67260	Chr1	25167461	25169307	3.81952	4.3265
AT1G04260	Chr1	1140527	1141365	2.03679	0.789251		AT1G68340	Chr1	25614196	25615403	0.675222	0.897992
AT1G04450	Chr1	1208520	1209874	3.77055	3.62306		AT1G68350	Chr1	25616489	25617265	1.99779	3.41043
AT1G04470	Chr1	1211048	1214662	2.84522	0.531456		AT1G71002	Chr1	26773538	26773725	2.7275	4.31727
AT1G04920	Chr1	1391501	1395864	1.1388	0.444879		AT1G74500	Chr1	27998174	27998821	3.5376	4.34889
AT1G05320	Chr1	1553602	1557733	2.21542	0.869245		AT1G74660	Chr1	28047575	28048127	3.47784	4.46193
AT1G05520	Chr1	1630899	1635711	0.91035	0.746528		AT2G14692	Chr2	6287639	6287771	2.4346	3.90452
AT1G05540	Chr1	1639285	1640811	2.60696	1.21988		AT2G14700	Chr2	6292465	6295726	1.23658	2.64865
AT1G05620	Chr1	1679157	1681710	1.3542	0.76311		AT2G18550	Chr2	8049662	8051213	2.4137	2.54967
AT1G05700	Chr1	1709795	1713245	1.99285	0.553611		AT2G19110	Chr2	8278880	8286445	0.862784	1.01885
AT1G05710	Chr1	1714949	1717276	1.5942	0.682376		AT2G22750	Chr2	9672143	9673928	3.51092	4.5511
AT1G05720	Chr1	1717446	1718909	0.82918	0.647497		AT2G22760	Chr2	9677879	9679364	2.24765	3.87204
AT1G05750	Chr1	1721508	1724734	0.956582	0.682247		AT2G25790	Chr2	11000598	11004235	2.99905	3.49613
AT1G05910	Chr1	1790223	1796647	0.931103	0.635942		AT2G26960	Chr2	11506064	11507426	2.24911	2.65137
AT1G05920	Chr1	1796777	1798254	2.45029	0.883718		AT2G27680	Chr2	11803810	11806013	0.906182	1.09686
AT1G05950	Chr1	1804400	1807471	1.39305	0.534179		AT2G28210	Chr2	12029996	12032420	1.23796	2.53861
AT1G06030	Chr1	1826879	1828161	1.36102	0.618596		AT2G28220	Chr2	12033952	12037527	2.22954	2.56594
AT1G06160	Chr1	1883003	1883934	2.74617	1.31681		AT2G28340	Chr2	12103671	12106172	2.75616	3.73361
AT1G06310	Chr1	1926790	1930258	1.72544	0.886497		AT2G28510	Chr2	12199097	12200765	2.05394	3.3611
AT1G06920	Chr1	2124853	2125801	2.19779	0.798843		AT2G28710	Chr2	12322385	12323584	2.25499	3.40477
AT1G07180	Chr1	2204319	2206934	1.40643	0.719527		AT2G28810	Chr2	12363425	12365377	3.64278	4.20283
AT1G07340	Chr1	2254821	2256850	3.30777	0.620283		AT2G30660	Chr2	13058249	13061673	2.73214	3.45365
AT1G07620	Chr1	2344389	2346842	2.24201	0.739694		AT2G31081	Chr2	13238046	13238600	3.41201	4.33177
AT1G08340	Chr1	2631067	2632871	1.64494	0.91312		AT2G31083	Chr2	13252218	13252765	3.51106	4.3222
AT1G08860	Chr1	2842152	2846138	2.19882	1.85655		AT2G31085	Chr2	13254177	13254706	2.70443	3.79239
AT1G09540	Chr1	3086158	3087912	3.25562	0.758648		AT2G32960	Chr2	13987766	13990976	1.19374	2.26605
AT1G09550	Chr1	3089732	3092327	3.60259	3.56394		AT2G35270	Chr2	14857020	14857878	3.63054	4.1298
AT1G09930	Chr1	3227489	3230043	3.13354	2.59194		AT2G39510	Chr2	16491142	16493151	3.11966	3.86876
AT1G10060	Chr1	3284238	3287107	1.74036	0.900064		AT2G39518	Chr2	16495874	16496995	2.11787	3.82449
AT1G10380	Chr1	3400605	3402324	2.97955	2.3929
AT1G10385	Chr1	3403223	3405856	3.33476	1.78492
AT1G10620	Chr1	3509000	3511975	2.18488	2.05304
AT1G10680	Chr1	3538469	3543782	2.36081	1.19881
AT1G10690	Chr1	3549991	3550632	2.52069	0.74324
AT1G11050	Chr1	3681887	3684169	0.809564	0.790223
AT1G11070	Chr1	3690211	3693648	1.33358	0.772561
AT1G11110	Chr1	3710207	3712503	1.78866	0.653818
AT1G11480	Chr1	3864152	3866969	0.975794	0.864964
AT1G11490	Chr1	3868883	3870065	2.93379	0.731267
AT1G11500	Chr1	3870832	3871570	2.92847	1.0232
AT1G11510	Chr1	3871777	3872836	3.66768	2.21632
AT1G11540	Chr1	3875441	3877155	2.30197	0.623083
AT1G11990	Chr1	4046245	4049060	2.60166	1.27672
AT1G12000	Chr1	4049895	4053835	0.909969	0.728798
AT1G12480	Chr1	4257267	4259300	1.46059	0.615941
AT1G12880	Chr1	4389750	4391151	1.45616	0.639579
AT1G13080	Chr1	4459165	4460940	2.02889	0.764476
AT1G13090	Chr1	4461805	4463543	1.34316	0.72043
AT1G13110	Chr1	4467219	4469033	1.50019	0.685532
AT1G13310	Chr1	4561067	4563061	3.04414	0.935591
AT1G14100	Chr1	4827960	4829587	2.82345	1.89313
AT1G14110	Chr1	4830296	4831915	3.75815	3.71768
AT1G14185	Chr1	4850273	4852096	2.19224	0.583563
AT1G14190	Chr1	4852801	4854307	1.93141	0.466693
AT1G14250	Chr1	4868451	4871488	1.97821	1.59801
AT1G14420	Chr1	4931565	4933515	2.66669	0.967855
AT1G14440	Chr1	4938823	4940903	1.70767	1.64245
AT1G15210	Chr1	5231347	5236573	1.28242	0.525691
AT1G15520	Chr1	5331857	5338326	1.25806	0.474149
AT1G15570	Chr1	5362008	5365549	0.966665	0.734742
AT1G15580	Chr1	5365664	5366497	1.96344	1.85234
AT1G15590	Chr1	5367296	5368670	3.4537	3.33262
AT1G15600	Chr1	5368922	5370344	2.23677	2.14305
AT1G15640	Chr1	5378885	5380139	3.29471	2.08044
AT1G15660	Chr1	5381169	5385254	0.905078	0.689998
AT1G15770	Chr1	5426891	5428280	2.14873	0.465781
AT1G16120	Chr1	5522638	5524983	2.00879	0.536252
AT1G16130	Chr1	5525490	5528212	1.62179	0.526772
AT1G16290	Chr1	5570752	5573538	1.57385	1.30257
AT1G16310	Chr1	5578430	5580693	1.93921	0.977645
AT1G16380	Chr1	5598452	5601367	2.90496	1.25818
AT1G16440	Chr1	5615814	5617672	2.2486	0.597837
AT1G17010	Chr1	5817566	5819352	2.86719	2.49949
AT1G17020	Chr1	5820205	5822013	2.99849	1.01439
AT1G17040	Chr1	5824847	5828233	0.848563	0.705334
AT1G17180	Chr1	5872144	5873086	1.90368	0.661336
AT1G17420	Chr1	5977410	5981480	1.60546	1.40273
AT1G17615	Chr1	6059440	6060667	2.69776	1.0436
AT1G17960	Chr1	6180895	6183806	3.10757	2.03456
AT1G18130	Chr1	6235894	6238799	1.10787	0.89089
AT1G18310	Chr1	6301199	6303956	2.30233	0.842659
AT1G18390	Chr1	6325641	6330098	1.72799	0.800026
AT1G18790	Chr1	6478850	6480043	3.48052	2.05537
AT1G18800	Chr1	6481112	6483596	2.63473	0.813807
AT1G18830	Chr1	6489308	6494218	2.89089	0.877415
AT1G18870	Chr1	6515428	6519282	1.22917	0.626881
AT1G18890	Chr1	6522763	6525962	0.874612	0.698156
AT1G20080	Chr1	6962131	6965045	3.1314	2.84897
AT1G20120	Chr1	6975387	6977264	1.90701	1.55572
AT1G20150	Chr1	6987331	6990361	2.34698	0.55733
AT1G20180	Chr1	6996209	6997943	2.49357	2.23657
AT1G20190	Chr1	6998488	6999817	1.68922	0.782648
AT1G20320	Chr1	7033656	7034874	1.92968	1.81644
AT1G20360	Chr1	7046503	7047744	2.53272	1.39683
AT1G20860	Chr1	7254006	7258677	1.7966	1.21434
AT1G20870	Chr1	7259101	7260775	1.45668	0.774555
AT1G21090	Chr1	7384628	7386558	2.18192	0.709239
AT1G21100	Chr1	7386838	7388428	2.11807	1.20934
AT1G21210	Chr1	7424105	7427041	1.5541	0.433929
AT1G21230	Chr1	7429979	7432346	1.28143	0.356102
AT1G21240	Chr1	7434302	7436830	1.72478	0.405106
AT1G21250	Chr1	7439265	7442113	3.22423	0.594523
AT1G21440	Chr1	7502158	7504175	0.81704	0.687352
AT1G21470	Chr1	7516708	7517179	3.47875	3.43053
AT1G21530	Chr1	7545150	7546936	2.76555	2.11453
AT1G22000	Chr1	7744188	7747785	1.84173	1.4987
AT1G22030	Chr1	7759163	7760556	1.62676	0.836601
AT1G22130	Chr1	7812386	7814264	2.29642	1.73915
AT1G22140	Chr1	7814762	7815631	3.02867	1.12641
AT1G22150	Chr1	7818360	7821344	3.55561	1.43994
AT1G22460	Chr1	7927427	7930657	1.30529	0.670167
AT1G22650	Chr1	8013381	8015991	1.66842	1.03969
AT1G23000	Chr1	8143403	8145070	2.4622	0.942274
AT1G23100	Chr1	8195775	8196475	2.39997	0.90401
AT1G23210	Chr1	8240173	8242129	2.39364	1.25168
AT1G23750	Chr1	8400150	8401487	1.46201	0.935216
AT1G23760	Chr1	8402045	8404301	2.73203	2.16723
AT1G23780	Chr1	8406685	8408525	0.787847	0.756494
AT1G23810	Chr1	8417494	8418566	3.09104	2.09198
AT1G23970	Chr1	8482012	8483875	1.73465	0.925363
AT1G24200	Chr1	8571172	8572377	1.39158	1.1694
AT1G24220	Chr1	8578657	8582413	1.86186	0.670925
AT1G24400	Chr1	8651406	8653828	2.45189	2.17566
AT1G24430	Chr1	8658002	8659506	1.65632	0.812931
AT1G24540	Chr1	8699750	8701421	2.86004	2.20694
AT1G25425	Chr1	8922699	8923331	2.37824	2.28216
AT1G25450	Chr1	8938478	8940387	3.20011	2.53614
AT1G26380	Chr1	9126736	9128528	2.66762	2.47345
AT1G26390	Chr1	9130016	9131779	3.51187	3.15004
AT1G26400	Chr1	9133290	9134874	3.02236	2.33968
AT1G26480	Chr1	9156328	9157950	1.83191	0.580042
AT1G26680	Chr1	9219462	9223649	1.12961	0.477284
AT1G26790	Chr1	9273856	9275312	2.44996	1.44811
AT1G26890	Chr1	9317588	9319246	1.45835	0.911127
AT1G27045	Chr1	9391608	9393019	1.49196	1.26148
AT1G27130	Chr1	9425459	9426886	2.31732	0.690638
AT1G27150	Chr1	9429046	9432274	1.03979	0.73517
AT1G27170	Chr1	9433487	9439417	0.946325	0.485723
AT1G27461	Chr1	9537745	9539013	3.02844	2.82688
AT1G27580	Chr1	9589932	9591075	1.42358	0.936979
AT1G27940	Chr1	9733596	9738129	2.26005	0.649557
AT1G28000	Chr1	9756673	9757963	1.85357	1.32122
AT1G28130	Chr1	9825285	9828067	1.64975	1.14521
AT1G28170	Chr1	9841331	9842312	2.91064	2.70812
AT1G28180	Chr1	9843074	9845002	2.90722	1.15264
AT1G28610	Chr1	10053616	10055731	2.50171	1.55112
AT1G28660	Chr1	10071711	10073411	1.93823	1.68033
AT1G29020	Chr1	10120496	10122902	1.93144	1.11391
AT1G29179	Chr1	10198763	10200255	2.08382	1.85173
AT1G29180	Chr1	10199627	10200962	1.83723	1.19101
AT1G29600	Chr1	10344045	10346243	1.70897	0.531342
AT1G29660	Chr1	10371838	10373766	3.4344	1.27307
AT1G30050	Chr1	10543021	10544591	1.77841	0.967598
AT1G30080	Chr1	10550946	10553215	2.72915	2.25372
AT1G30170	Chr1	10607887	10609618	3.12161	2.44628
AT1G30220	Chr1	10632820	10635471	2.48589	0.891277
AT1G30710	Chr1	10895279	10897109	3.92331	2.98368
AT1G30910	Chr1	11000882	11002936	0.85916	0.803936
AT1G30920	Chr1	11004241	11005444	3.43445	3.38712
AT1G30925	Chr1	11009887	11011792	3.03578	2.62771
AT1G31550	Chr1	11295524	11297379	1.97412	1.30076
AT1G32910	Chr1	11925425	11926908	2.31258	1.47737
AT1G33590	Chr1	12177776	12179413	1.48992	1.06775
AT1G33680	Chr1	12203944	12208698	0.887032	0.728339
AT1G33800	Chr1	12261418	12262717	1.76555	0.674542
AT1G33860	Chr1	12294393	12295305	2.06811	1.89987
AT1G33940	Chr1	12330575	12332785	1.85138	1.44126
AT1G34180	Chr1	12448566	12451287	1.749	0.781664
AT1G34190	Chr1	12451450	12454142	0.852545	0.850818
AT1G34460	Chr1	12595109	12599628	3.03146	2.90088
AT1G34510	Chr1	12615732	12617032	2.9018	2.77001
AT1G34575	Chr1	12657148	12658732	3.83079	2.48397
AT1G35350	Chr1	12981250	12984583	1.60051	1.17645
AT1G35365	Chr1	12991391	12992145	3.07494	3.03374
AT1G46408	Chr1	17232134	17232935	3.65379	2.32336
AT1G46912	Chr1	17272520	17273629	3.05264	1.85458
AT1G47770	Chr1	17590265	17591261	1.46216	1.0947
AT1G47840	Chr1	17616106	17618894	1.24119	1.07411
AT1G48180	Chr1	17792448	17793717	1.15154	0.466759
AT1G48400	Chr1	17882135	17883855	2.21161	0.933787
AT1G48405	Chr1	17884644	17885614	2.05581	1.26099
AT1G48730	Chr1	18020336	18022277	2.5246	2.0518
AT1G48740	Chr1	18023386	18026065	1.42537	1.00237
AT1G49160	Chr1	18179303	18182391	2.7754	0.669824
AT1G49210	Chr1	18201888	18202764	1.64085	1.05204
AT1G49220	Chr1	18205933	18206701	2.22857	1.49675
AT1G49250	Chr1	18220532	18224256	2.84939	2.76231
AT1G49270	Chr1	18227333	18230227	2.54021	1.90184
AT1G49900	Chr1	18473907	18477643	1.96669	0.71773
AT1G49920	Chr1	18481773	18484233	1.57918	0.62418
AT1G49940	Chr1	18488359	18491179	1.14217	0.645281
AT1G49960	Chr1	18498638	18501886	1.57103	1.13067
AT1G50120	Chr1	18561828	18566172	0.854446	0.733763
AT1G50680	Chr1	18777600	18778614	2.55817	1.35946
AT1G51040	Chr1	18920657	18923314	2.65198	2.20016
AT1G51055	Chr1	18925285	18926315	1.5836	1.19789
AT1G51210	Chr1	18987808	18989110	3.76042	1.31546
AT1G51538	Chr1	19113182	19115273	1.88285	0.765949
AT1G51670	Chr1	19156503	19158749	2.14304	0.548388
AT1G51780	Chr1	19204511	19206586	2.11725	1.24931
AT1G51790	Chr1	19206710	19211417	1.97369	0.624924
AT1G51800	Chr1	19214147	19217970	2.77127	1.08129
AT1G51870	Chr1	19262878	19267001	2.72561	2.6871
AT1G51890	Chr1	19274657	19278528	2.25662	1.55523
AT1G52920	Chr1	19709274	19711052	1.67582	0.587908
AT1G53023	Chr1	19754213	19755843	3.21732	2.61625
AT1G53025	Chr1	19756823	19759623	1.48418	0.830943
AT1G53180	Chr1	19831440	19832895	2.89171	1.51046
AT1G53330	Chr1	19896026	19897442	0.959392	0.866477
AT1G53345	Chr1	19902494	19903700	3.23981	0.820664
AT1G53350	Chr1	19903898	19907515	1.86649	0.870064
AT1G53800	Chr1	20081698	20084500	0.928392	0.847282
AT1G53815	Chr1	20090248	20090962	1.94702	1.92676
AT1G53820	Chr1	20091490	20092423	3.45759	3.01117
AT1G54300	Chr1	20270809	20272106	3.02314	2.83732
AT1G54560	Chr1	20371648	20379745	1.17627	0.761457
AT1G54930	Chr1	20478266	20479671	2.8413	2.19437
AT1G55546	Chr1	20743827	20745109	2.71966	1.12176
AT1G55550	Chr1	20748914	20753079	2.10456	0.871375
AT1G55560	Chr1	20754320	20756656	2.74372	2.53758
AT1G55700	Chr1	20821600	20823640	3.06519	2.97404
AT1G55720	Chr1	20828117	20830640	2.14415	1.86282
AT1G55790	Chr1	20852323	20856122	2.13795	1.56585
AT1G55930	Chr1	20918716	20922232	0.874926	0.618836
AT1G56040	Chr1	20960355	20962334	3.72787	3.05181
AT1G56410	Chr1	21117146	21119241	3.12934	1.34824
AT1G56520	Chr1	21174663	21178974	2.30598	1.75532
AT1G56530	Chr1	21179236	21180888	1.56373	1.47301
AT1G56540	Chr1	21181663	21185306	3.18565	2.58225
AT1G56550	Chr1	21185661	21188369	2.60005	2.14461
AT1G57720	Chr1	21377614	21380382	0.857602	0.758402
AT1G58037	Chr1	21472964	21474602	2.41768	2.04127
AT1G59620	Chr1	21902283	21905685	1.29633	0.861659
AT1G59640	Chr1	21909174	21911201	1.52678	0.700326
AT1G59725	Chr1	21950737	21952210	3.24705	2.06526
AT1G59810	Chr1	22008603	22009455	3.01524	1.9729
AT1G60030	Chr1	22113840	22116845	2.24978	0.668621
AT1G60040	Chr1	22119074	22119929	2.86889	2.42004
AT1G60090	Chr1	22155581	22158065	2.57752	1.24409
AT1G60260	Chr1	22218787	22221409	1.33304	0.86142
AT1G60270	Chr1	22221676	22224257	2.29801	1.19206
AT1G60920	Chr1	22429691	22430267	2.77886	0.730208
AT1G60930	Chr1	22430846	22438877	0.972034	0.498458
AT1G61050	Chr1	22486735	22488284	1.48184	0.631706
AT1G61060	Chr1	22488547	22489711	1.97122	1.54883
AT1G61080	Chr1	22493193	22497019	1.83931	1.32512
AT1G61090	Chr1	22499316	22500331	2.6721	1.45001
AT1G61093	Chr1	22501884	22502941	2.6038	2.07213
AT1G61095	Chr1	22504513	22505511	2.41013	1.73158
AT1G61570	Chr1	22718704	22719516	2.0207	0.926506
AT1G61610	Chr1	22733471	22736509	1.4462	0.673367
AT1G61710	Chr1	22788858	22790576	2.73344	2.55523
AT1G61720	Chr1	22791167	22792800	2.14296	1.12563
AT1G61940	Chr1	22897398	22898575	2.00566	0.620306
AT1G61950	Chr1	22899416	22901946	1.54898	0.667457
AT1G62020	Chr1	22919533	22924024	0.887732	0.723177
AT1G62085	Chr1	22948756	22950142	1.75903	0.732974
AT1G62260	Chr1	22997825	22999796	0.858479	0.741688
AT1G62280	Chr1	23007146	23008585	2.82608	1.86446
AT1G62290	Chr1	23009910	23013529	2.1703	1.89575
AT1G62630	Chr1	23185911	23188593	1.55642	1.4478
AT1G62940	Chr1	23310534	23312747	1.94014	1.59672
AT1G63100	Chr1	23399390	23401367	2.48969	0.590295
AT1G63300	Chr1	23482192	23486220	0.978371	0.540519
AT1G63310	Chr1	23486306	23487085	1.86001	0.801481
AT1G63320	Chr1	23488883	23489530	1.63336	0.956216
AT1G63440	Chr1	23527654	23531109	1.58579	0.862495
AT1G63450	Chr1	23531408	23534569	2.20646	2.15445
AT1G63750	Chr1	23650847	23655363	1.18601	1.11268
AT1G63870	Chr1	23707130	23711901	1.41764	0.844483
AT1G64100	Chr1	23791584	23795563	1.90199	1.10511
AT1G64110	Chr1	23796718	23801725	2.83607	0.775992
AT1G64210	Chr1	23831032	23832863	3.40245	0.503633
AT1G64260	Chr1	23847755	23849915	1.75145	1.01754
AT1G64625	Chr1	24016642	24019271	1.80679	0.714054
AT1G64660	Chr1	24028917	24030780	2.33191	1.33753
AT1G64670	Chr1	24030819	24033556	2.73488	1.39629
AT1G64700	Chr1	24039809	24040595	2.36488	2.32709
AT1G64940	Chr1	24123788	24125324	2.94224	2.50531
AT1G65110	Chr1	24183958	24188330	1.15636	0.643309
AT1G65130	Chr1	24196471	24201022	1.18309	0.634071
AT1G65150	Chr1	24203840	24205775	2.73755	1.50465
AT1G65160	Chr1	24206223	24207738	2.13697	0.988956
AT1G65200	Chr1	24218469	24222789	1.79575	1.08806
AT1G65370	Chr1	24284468	24286145	2.94754	1.807
AT1G65610	Chr1	24391678	24395360	1.67679	0.975128
AT1G65730	Chr1	24442503	24446291	2.44032	2.34281
AT1G65780	Chr1	24462957	24466888	2.49545	1.96907
AT1G65790	Chr1	24468931	24472329	2.10521	1.64285
AT1G65800	Chr1	24473120	24476715	1.61229	1.31815
AT1G65810	Chr1	24477042	24480728	1.43358	0.924145
AT1G65900	Chr1	24515836	24518487	1.74542	0.857244
AT1G66450	Chr1	24786199	24788302	1.97583	1.69452
AT1G66460	Chr1	24789734	24791988	2.49572	0.964716
AT1G66500	Chr1	24811148	24812650	2.44961	1.4983
AT1G66540	Chr1	24824458	24826670	2.4214	1.02151
AT1G66550	Chr1	24828501	24829639	2.24996	0.665197
AT1G66570	Chr1	24835250	24837322	2.14581	2.07388
AT1G66610	Chr1	24849715	24851450	2.3226	0.881068
AT1G66650	Chr1	24860112	24861821	2.00705	1.30974
AT1G66780	Chr1	24909212	24911485	3.24714	2.91538
AT1G66830	Chr1	24930664	24932918	1.49194	0.610821
AT1G67000	Chr1	25004108	25007647	3.05509	1.87189
AT1G67020	Chr1	25011007	25012987	1.68492	0.494822
AT1G67460	Chr1	25269625	25271861	1.68575	0.95143
AT1G67620	Chr1	25340574	25342082	3.05685	1.17504
AT1G67623	Chr1	25342110	25343243	1.99354	1.12233
AT1G68330	Chr1	25610922	25612202	1.70208	1.46991
AT1G68600	Chr1	25759841	25762934	2.25562	1.51006
AT1G68640	Chr1	25769575	25772543	1.79412	0.870125
AT1G68740	Chr1	25812448	25816657	1.75161	0.635059
AT1G69530	Chr1	26141835	26143500	1.63526	0.804986
AT1G69540	Chr1	26145043	26147571	2.32267	0.704937
AT1G69570	Chr1	26161527	26163496	2.0471	0.996568
AT1G69710	Chr1	26222071	26226652	1.10323	0.531208
AT1G69720	Chr1	26226865	26228580	2.31001	1.06077
AT1G69730	Chr1	26228631	26231339	1.3648	0.833031
AT1G69790	Chr1	26266608	26269013	1.82963	1.43088
AT1G70110	Chr1	26406237	26408323	1.44946	0.608387
AT1G70130	Chr1	26409742	26411801	2.88827	0.783954
AT1G70140	Chr1	26412687	26415230	3.59798	0.678514
AT1G70500	Chr1	26566578	26568729	3.41103	1.82414
AT1G70505	Chr1	26570646	26572463	2.39951	0.788595
AT1G70820	Chr1	26705517	26708264	1.70094	0.927824
AT1G70870	Chr1	26721019	26721563	2.29562	2.14376
AT1G70950	Chr1	26752688	26755359	2.52435	0.854153
AT1G70960	Chr1	26756252	26757362	3.04212	2.06714
AT1G71140	Chr1	26824676	26826748	2.15553	0.958823
AT1G71150	Chr1	26827145	26828674	3.13418	1.45775
AT1G71160	Chr1	26828700	26830208	3.12304	2.33113
AT1G71280	Chr1	26870140	26872152	0.728425	0.394173
AT1G71290	Chr1	26872642	26873242	2.73761	2.17082
AT1G71300	Chr1	26874063	26878340	1.26423	0.812498
AT1G71370	Chr1	26897004	26899434	1.25736	0.904346
AT1G71680	Chr1	26944586	26947188	3.14746	2.58426
AT1G71690	Chr1	26947764	26949168	3.73928	1.63302
AT1G72000	Chr1	27103276	27105663	1.80949	1.63329
AT1G72120	Chr1	27132096	27133985	2.76214	0.731026
AT1G72125	Chr1	27134167	27136389	2.89166	2.49191
AT1G72220	Chr1	27184280	27185830	3.26543	1.33157
AT1G72270	Chr1	27199732	27211161	1.07843	0.528146
AT1G72460	Chr1	27279509	27281533	1.84793	1.08781
AT1G73060	Chr1	27478969	27481448	0.839059	0.789772
AT1G73150	Chr1	27504111	27506112	0.724163	0.682944
AT1G73160	Chr1	27506533	27507994	3.31182	0.798059
AT1G73300	Chr1	27559672	27562048	1.88953	0.953786
AT1G73340	Chr1	27573115	27575419	1.43365	0.522203
AT1G73590	Chr1	27659672	27663178	2.3289	2.26684
AT1G73860	Chr1	27770985	27776857	1.83303	0.757651
AT1G74110	Chr1	27866666	27868368	3.47044	3.23217
AT1G74130	Chr1	27873610	27876033	3.01985	0.686171
AT1G74140	Chr1	27876904	27879780	2.48892	1.5044
AT1G74220	Chr1	27913098	27914134	1.84221	0.657878
AT1G74230	Chr1	27914698	27917083	0.73958	0.700427
AT1G74430	Chr1	27975178	27977434	1.40047	1.08431
AT1G74440	Chr1	27976501	27980404	0.932583	0.818402
AT1G74460	Chr1	27987960	27989801	1.96543	1.07885
AT1G74480	Chr1	27993031	27994178	1.31142	0.689177
AT1G74490	Chr1	27994699	27996742	2.96533	0.628972
AT1G75410	Chr1	28299791	28302603	1.80173	0.699176
AT1G77210	Chr1	29008938	29012096	2.43478	0.757757
AT1G77330	Chr1	29062989	29064537	1.98535	0.595392
AT1G77520	Chr1	29130402	29132180	1.96641	1.93841
AT1G77720	Chr1	29210520	29214087	0.908181	0.574039
AT1G77920	Chr1	29298242	29300863	2.4246	0.787967
AT1G77930	Chr1	29300999	29303570	1.40091	1.13713
AT1G78160	Chr1	29407899	29410184	3.03208	1.08053
AT1G78170	Chr1	29414058	29415094	1.95762	1.5125
AT1G78370	Chr1	29484268	29485290	2.96302	1.30901
AT1G78390	Chr1	29490894	29492875	1.89259	1.40898
AT1G78400	Chr1	29498280	29499682	2.25594	2.06293
AT1G78420	Chr1	29504531	29507669	1.79451	0.756361
AT1G78430	Chr1	29508958	29510895	2.48717	0.660054
AT1G78440	Chr1	29511598	29513051	3.38029	0.784778
AT1G78580	Chr1	29552339	29560912	1.23694	0.753482
AT1G78720	Chr1	29605628	29607510	2.61806	2.0021
AT1G78760	Chr1	29615173	29616738	3.1455	2.78574
AT1G78770	Chr1	29616918	29621447	1.07088	0.697286
AT1G78950	Chr1	29684431	29688673	1.07405	0.706877
AT1G78955	Chr1	29689152	29694255	1.26342	1.16412
AT1G78980	Chr1	29707686	29711421	2.66033	1.0604
AT1G78990	Chr1	29713530	29714969	2.5971	1.13992
AT1G79400	Chr1	29864991	29867840	2.37794	0.693149
AT1G79860	Chr1	30042091	30044175	3.70515	3.19748
AT1G80110	Chr1	30135380	30136956	3.52582	2.40251
AT1G80730	Chr1	30339322	30340247	3.05969	2.53776
AT1G80740	Chr1	30342393	30347048	1.93097	0.904911
AT2G01010	Chr2	3705	5513	0.136842	0.0700955
AT2G01020	Chr2	5781	5945	1.04613	0.961865
AT2G01023	Chr2	9647	9767	1.62064	0.663107
AT2G01750	Chr2	328088	332113	0.842862	0.616521
AT2G01770	Chr2	334771	336438	2.62221	2.26196
AT2G01780	Chr2	338023	339871	2.34754	1.64131
AT2G01790	Chr2	341321	342480	2.33505	1.34088
AT2G01800	Chr2	343561	345254	2.75013	2.31223
AT2G02240	Chr2	592358	593602	1.7961	1.68806
AT2G02290	Chr2	604452	605361	2.30616	1.52262
AT2G02680	Chr2	745774	748573	2.84607	2.776
AT2G02690	Chr2	749918	751900	2.49333	2.06085
AT2G03330	Chr2	1008459	1014122	1.1876	1.13559
AT2G03505	Chr2	1064235	1065372	2.62298	1.13816
AT2G03560	Chr2	1079638	1081376	2.48228	2.35753
AT2G04500	Chr2	1568283	1570271	2.31391	2.07535
AT2G05140	Chr2	1853934	1854903	2.10426	1.88484
AT2G10450	Chr2	4020304	4020773	1.86588	1.72355
AT2G13680	Chr2	5694397	5706134	1.18735	0.79303
AT2G14810	Chr2	6357464	6358470	1.67502	0.723702
AT2G15310	Chr2	6653790	6655501	2.4406	2.2378
AT2G15350	Chr2	6688139	6689462	1.93338	1.31529
AT2G16210	Chr2	7026762	7029054	2.52892	1.15196
AT2G16220	Chr2	7030154	7031378	3.15716	2.88958
AT2G16586	Chr2	7190936	7191938	0.706752	0.50375
AT2G17050	Chr2	7410834	7415610	2.16572	1.51407
AT2G17070	Chr2	7430862	7431654	2.64881	2.10798
AT2G17770	Chr2	7723102	7724323	1.88261	0.689412
AT2G17780	Chr2	7724884	7727404	1.68494	1.074
AT2G17990	Chr2	7826816	7828754	0.728745	0.698645
AT2G18000	Chr2	7829034	7830580	1.96971	0.700082
AT2G18180	Chr2	7911053	7913695	2.2426	1.08045
AT2G18190	Chr2	7914304	7915872	2.87301	2.48644
AT2G18193	Chr2	7917504	7919277	1.55622	0.795717
AT2G18250	Chr2	7939906	7941678	0.769777	0.74183
AT2G18260	Chr2	7942152	7943388	2.83489	0.752762
AT2G18460	Chr2	8001319	8002998	2.56738	1.8428
AT2G18600	Chr2	8073199	8074982	2.90377	2.57503
AT2G18640	Chr2	8083739	8084888	2.94219	0.774295
AT2G18650	Chr2	8086859	8088131	1.96983	0.770067
AT2G18720	Chr2	8114919	8116811	3.23758	1.94992
AT2G19130	Chr2	8293681	8296275	1.84482	0.954188
AT2G19190	Chr2	8326048	8329944	1.84981	0.558913
AT2G20150	Chr2	8697299	8699299	2.96451	2.65988
AT2G20800	Chr2	8953251	8955761	1.61934	0.955722
AT2G21680	Chr2	9267729	9269019	3.76736	1.18892
AT2G21730	Chr2	9280043	9281623	1.71205	0.979377
AT2G21770	Chr2	9284836	9289536	1.31638	0.594407
AT2G21850	Chr2	9315217	9318238	2.04824	1.44033
AT2G21880	Chr2	9324632	9326321	2.6174	2.16783
AT2G21890	Chr2	9331088	9332646	1.75243	0.920459
AT2G22930	Chr2	9759672	9761163	1.76555	1.58253
AT2G22950	Chr2	9766126	9769766	1.8415	1.61895
AT2G23240	Chr2	9895854	9896325	3.27975	2.72425
AT2G23260	Chr2	9899926	9901439	3.16371	2.93338
AT2G23530	Chr2	10020651	10022864	2.92349	1.02176
AT2G23630	Chr2	10052565	10055317	2.22311	1.95041
AT2G24250	Chr2	10313285	10314920	0.835345	0.697817
AT2G24255	Chr2	10315514	10317353	3.84208	3.5104
AT2G24440	Chr2	10391088	10392828	1.02377	0.64722
AT2G24450	Chr2	10392786	10393976	1.36494	0.613952
AT2G24460	Chr2	10394328	10395390	2.50225	2.2957
AT2G24470	Chr2	10395827	10396622	2.26616	2.05904
AT2G24490	Chr2	10397376	10400498	1.293	0.860639
AT2G24560	Chr2	10431536	10432933	2.13384	1.52274
AT2G25355	Chr2	10801277	10803722	1.4536	0.862902
AT2G25360	Chr2	10804248	10805761	2.51798	2.39947
AT2G25540	Chr2	10866821	10872077	1.27987	0.77514
AT2G25600	Chr2	10894485	10898642	1.58477	0.449043
AT2G26160	Chr2	11137977	11139451	3.38671	2.81375
AT2G26310	Chr2	11201302	11204153	1.1269	0.74592
AT2G26420	Chr2	11239433	11242239	1.62544	1.15729
AT2G26440	Chr2	11247382	11249493	1.79613	1.15613
AT2G26450	Chr2	11251119	11253612	2.94975	1.45857
AT2G26460	Chr2	11254931	11258973	0.938844	0.734837
AT2G26950	Chr2	11500720	11502136	1.9055	1.80446
AT2G27000	Chr2	11523303	11525095	1.76233	0.882066
AT2G27010	Chr2	11526167	11527854	2.33623	0.860402
AT2G27410	Chr2	11724426	11725419	2.9953	0.6425
AT2G27740	Chr2	11822731	11823732	2.99072	2.39136
AT2G27750	Chr2	11823915	11824461	4.14062	3.76739
AT2G27780	Chr2	11845471	11846578	2.21387	1.39594
AT2G28010	Chr2	11930578	11931769	3.29403	3.14668
AT2G28020	Chr2	11933701	11934060	3.33326	2.78169
AT2G28030	Chr2	11934207	11935386	3.38459	2.56431
AT2G28040	Chr2	11936053	11937401	1.11324	0.65657
AT2G28690	Chr2	12306889	12308628	2.11918	1.09758
AT2G29040	Chr2	12472424	12474962	2.13846	1.24601
AT2G29350	Chr2	12600913	12602556	2.72333	1.54118
AT2G29380	Chr2	12608701	12610167	2.63079	2.16518
AT2G29410	Chr2	12616563	12617987	2.75378	0.595746
AT2G29430	Chr2	12619553	12620027	2.76336	1.30245
AT2G29440	Chr2	12620059	12621148	3.22307	2.047
AT2G29480	Chr2	12630197	12631321	2.96551	1.92519
AT2G29620	Chr2	12662740	12665803	1.81227	0.649477
AT2G29760	Chr2	12712883	12715852	1.03855	0.745351
AT2G29940	Chr2	12760138	12766623	2.76326	1.21814
AT2G29950	Chr2	12767584	12768435	2.31658	0.869826
AT2G30210	Chr2	12887445	12889874	3.49078	2.10162
AT2G30240	Chr2	12899906	12902779	3.16208	2.35155
AT2G30380	Chr2	12948283	12950573	1.41814	0.575683
AT2G30650	Chr2	13053776	13056380	3.09195	2.85719
AT2G31020	Chr2	13201667	13204821	1.36888	1.22545
AT2G31210	Chr2	13296142	13298277	1.97846	0.743442
AT2G31260	Chr2	13322020	13327400	0.907291	0.660191
AT2G31460	Chr2	13404775	13405510	3.10629	1.93945
AT2G31470	Chr2	13407491	13408655	2.33871	2.13665
AT2G31480	Chr2	13408977	13410999	2.0047	1.1348
AT2G31550	Chr2	13433805	13435207	1.80953	0.643412
AT2G32300	Chr2	13722426	13723590	1.43254	0.51304
AT2G32310	Chr2	13724393	13726374	1.77076	0.537724
AT2G32645	Chr2	13851666	13853343	1.31216	0.464414
AT2G32660	Chr2	13853757	13856112	2.21471	0.687992
AT2G32670	Chr2	13857876	13859774	2.24603	1.19751
AT2G32810	Chr2	13919126	13925351	0.853659	0.702687
AT2G32820	Chr2	13925816	13926979	3.5708	2.42887
AT2G32830	Chr2	13927698	13929713	3.3148	3.12591
AT2G33010	Chr2	14010837	14013246	2.41996	0.47498
AT2G33090	Chr2	14035214	14035961	3.15577	0.951076
AT2G33190	Chr2	14067971	14069111	2.48335	1.41582
AT2G33233	Chr2	14083029	14083614	2.29606	1.92666
AT2G33380	Chr2	14144830	14146471	1.70834	1.38035
AT2G33530	Chr2	14197645	14200560	2.48038	0.940731
AT2G34210	Chr2	14445937	14450522	1.67854	1.32804
AT2G34220	Chr2	14450535	14453856	1.62779	0.57852
AT2G34224	Chr2	14454087	14454258	1.27119	0.678883
AT2G34230	Chr2	14454638	14457213	1.33631	0.544344
AT2G34240	Chr2	14459156	14461802	1.23166	0.551789
AT2G34320	Chr2	14484958	14485837	2.76465	1.98098
AT2G34500	Chr2	14539478	14541406	2.1108	0.653368
AT2G34555	Chr2	14556987	14558697	1.84667	0.707763
AT2G34890	Chr2	14718194	14721271	1.7293	0.402385
AT2G34920	Chr2	14728026	14731156	2.7178	0.602203
AT2G35075	Chr2	14786681	14789023	1.28476	0.663151
AT2G35080	Chr2	14789244	14791448	2.59681	2.22647
AT2G35190	Chr2	14830625	14833319	0.872704	0.643967
AT2G35200	Chr2	14833847	14834624	2.5726	1.07835
AT2G35210	Chr2	14836061	14838149	3.38916	0.714727
AT2G35540	Chr2	14927157	14928930	1.16634	0.739627
AT2G35550	Chr2	14929280	14930892	3.23222	0.587221
AT2G35585	Chr2	14936665	14937964	2.74874	1.64451
AT2G35600	Chr2	14940844	14945357	1.2467	0.928964
AT2G35615	Chr2	14959390	14960734	2.03965	0.611294
AT2G35620	Chr2	14960939	14965497	0.916447	0.658177
AT2G35890	Chr2	15067174	15069136	1.66988	0.566977
AT2G35900	Chr2	15069996	15071653	0.725658	0.641641
AT2G35950	Chr2	15104760	15106088	2.07709	0.744744
AT2G36430	Chr2	15290203	15291763	1.69223	1.31389
AT2G36760	Chr2	15413041	15414594	1.69995	1.572
AT2G36815	Chr2	15440768	15441276	2.50466	1.9803
AT2G37440	Chr2	15718052	15722108	2.34938	2.24267
AT2G37460	Chr2	15726447	15729098	2.04179	1.59644
AT2G37710	Chr2	15814717	15817004	1.51555	0.823266
AT2G37770	Chr2	15834866	15837001	3.211	0.744545
AT2G37780	Chr2	15837441	15838302	3.38414	1.3997
AT2G38090	Chr2	15944710	15947085	2.55502	0.9494
AT2G38100	Chr2	15948483	15950228	2.4855	0.76498
AT2G38152	Chr2	15984061	15985278	2.42782	1.66024
AT2G38890	Chr2	16241188	16242917	2.24315	1.13498
AT2G38910	Chr2	16245213	16247483	2.86313	1.71683
AT2G38940	Chr2	16257227	16260225	2.12722	1.05003
AT2G39240	Chr2	16384785	16387827	1.77488	1.03107
AT2G39400	Chr2	16452611	16454801	2.34331	1.4232
AT2G39690	Chr2	16541025	16543378	2.60514	0.826566
AT2G39700	Chr2	16543831	16545584	2.24652	0.849342
AT2G39820	Chr2	16618276	16619689	2.19942	1.61909
AT2G40116	Chr2	16751713	16754535	2.4551	0.646817
AT2G40250	Chr2	16813329	16815251	1.75314	1.23119
AT2G40320	Chr2	16840146	16842282	1.90212	0.597805
AT2G40340	Chr2	16848437	16850487	3.04214	0.908405
AT2G40350	Chr2	16851594	16852068	3.21201	0.984749
AT2G40910	Chr2	17069867	17071657	2.62646	2.12871
AT2G40920	Chr2	17072463	17074164	1.02194	0.963096
AT2G40925	Chr2	17074904	17076239	1.82965	1.39745
AT2G40990	Chr2	17105096	17106773	2.55127	1.52515
AT2G41240	Chr2	17198281	17199320	1.92457	1.32243
AT2G41330	Chr2	17226947	17228378	1.7509	0.656365
AT2G41470	Chr2	17289951	17293749	2.57382	1.7178
AT2G41860	Chr2	17467343	17469786	3.11123	2.2362
AT2G41910	Chr2	17496955	17498077	2.92663	1.88903
AT2G41920	Chr2	17499403	17500452	2.90145	1.13613
AT2G41930	Chr2	17501628	17502684	2.73904	2.2602
AT2G42470	Chr2	17679886	17685187	2.69737	1.4721
AT2G42480	Chr2	17685804	17689928	2.83717	2.0916
AT2G42550	Chr2	17713195	17714230	3.44628	2.46138
AT2G42660	Chr2	17767049	17768290	2.65619	2.45802
AT2G42710	Chr2	17782307	17785063	0.839064	0.711406
AT2G42720	Chr2	17785408	17787421	2.24551	1.49471
AT2G42730	Chr2	17787453	17791582	1.8066	1.41711
AT2G42740	Chr2	17791728	17793082	1.22171	0.702208
AT2G42800	Chr2	17807941	17809590	3.14736	0.66056
AT2G42835	Chr2	17823264	17824842	2.52174	1.58462
AT2G42840	Chr2	17826115	17827536	2.71721	2.00163
AT2G42850	Chr2	17831654	17833432	1.93759	0.77433
AT2G42860	Chr2	17833764	17835113	2.32328	0.702614
AT2G43220	Chr2	17964218	17966211	2.51216	1.98194
AT2G43230	Chr2	17966250	17968726	1.18736	0.538263
AT2G43280	Chr2	17989697	17991022	1.26553	0.878409
AT2G43850	Chr2	18159181	18162044	0.912777	0.715698
AT2G44210	Chr2	18280622	18282876	2.41713	0.854874
AT2G44220	Chr2	18283802	18285837	2.47473	1.1859
AT2G44230	Chr2	18286524	18288400	2.52813	0.693252
AT2G44290	Chr2	18305200	18306251	2.03352	1.11306
AT2G44490	Chr2	18364755	18367725	1.43159	0.789667
AT2G45080	Chr2	18591664	18592455	2.35583	0.729378
