# Supplementary material for: Polycomb-dependent differential chromatin compartmentalization determines gene coregulation in Arabidopsis
Source: HighWire-hosted journal article supplement (doi:10.1101/gr.273771.120), 2021-06-03
Supplement: Supplemental_Table_S17.xlsx [file Supplemental_Table_S17.xlsx]

## Sheet: S17
Supplementary Table S17: Differentially expressed genes spanning ref6_vs_Col-0 loops
Gene1	Chr1	Start	End	Gene2	Gene2_Chr	Gene2_Start	Gene2_End	LFC_1	pval_1	LFC_2	pval_2
AT1G56540	1	21181663	21185306	AT1G56520	1	21174663	21178974	-1.46548	1.7e-08	-2.64047	3.33e-54				LFC_1>0	LFC_1<0
AT1G02260	1	440440	442877	AT1G02230	1	435173	436776	-0.547268	0.00301737	-1.99293	0.0027671			LFC_2>0	117	116
AT1G64110	1	23796718	23801725	AT1G64100	1	23791584	23795563	-2.73636	9.85e-30	-2.80449	1.1e-41			LFC_2<0	113	200
AT1G11410	1	3841285	3844432	AT1G11400	1	3837820	3840207	-1.03361	1.23e-08	0.390115	0.00123556
AT1G73170	1	27511660	27514797	AT1G73160	1	27506533	27507994	-0.553441	0.000201387	0.997639	0.0371025			X2 (3, N = 546) = 39.451, p = 1.393142e-8
AT1G05490	1	1618601	1623452	AT1G05470	1	1607356	1611703	-0.711736	0.0426352	-0.607206	0.00245795
AT1G29460	1	10307506	10308143	AT1G29430	1	10302649	10303335	0.522683	0.0178911	0.866484	1.79e-07
AT2G18193	2	7917504	7919277	AT2G18190	2	7914304	7915872	-2.01385	1.38e-21	-3.67447	6.02e-09
AT1G78720	1	29605628	29607510	AT1G78710	1	29601252	29604557	-2.50936	4.67e-09	0.596515	4.45e-06
AT1G21130	1	7399061	7400605	AT1G21110	1	7389980	7391553	0.753882	0.00013956	1.14258	2.49e-10
AT2G21770	2	9284836	9289536	AT2G21730	2	9280043	9281623	-0.89305	0.002959	-2.52864	1.14e-05
AT2G43510	2	18067171	18067802	AT2G43500	2	18061924	18066639	2.74899	4.83e-20	-0.602692	0.0351472
AT2G28260	2	12049988	12052453	AT2G28250	2	12043481	12046537	-0.635342	0.000477786	-0.670493	0.000834896
AT1G03820	1	959868	960728	AT1G03770	1	944571	947483	-0.610324	5.48e-05	0.60296	0.00204079
AT1G09290	1	3001516	3003762	AT1G09280	1	2998099	3001315	0.310684	0.0337547	0.4023	5.7e-05
AT1G65890	1	24512456	24514659	AT1G65860	1	24499065	24502745	-2.10819	0.00519371	-0.85855	0.0018477
AT1G73840	1	27763684	27766364	AT1G73830	1	27759972	27761588	0.296094	0.0323317	0.777715	2.56e-05
AT1G53350	1	19903898	19907515	AT1G53330	1	19896026	19897442	-1.09174	9.53e-12	0.754466	0.0317959
AT1G03680	1	916818	918064	AT1G03660	1	911435	911759	-0.267773	0.0469195	-1.22319	0.0305535
AT1G01670	1	242842	245988	AT1G01660	1	240056	242608	-8.965	9.47e-12	-2.25236	1.15e-09
AT1G18890	1	6522763	6525962	AT1G18870	1	6515428	6519282	0.480339	0.041197	-1.06926	0.00298509
AT1G05540	1	1639285	1640811	AT1G05520	1	1630899	1635711	-1.62535	2.47e-07	0.291117	0.0241334
AT1G70260	1	26456843	26459450	AT1G70250	1	26452964	26456088	-3.75778	1.03e-25	-1.03849	1.4e-10
AT2G32540	2	13814685	13818289	AT2G32530	2	13809215	13813570	-0.584263	0.000100646	-1.55147	2.59e-16
AT1G17230	1	5891323	5895075	AT1G17190	1	5875349	5876545	0.765287	3.4e-05	-0.503147	0.0364215
AT1G80720	1	30336137	30337565	AT1G80680	1	30324007	30328769	0.412701	0.037211	0.256344	0.0315702
AT2G01200	2	118016	119342	AT2G01190	2	114974	117640	1.74772	0.000144753	1.17266	9.39e-09
AT2G42200	2	17587406	17589630	AT2G42190	2	17582868	17584194	-1.1233	0.00274978	-0.528411	1.96e-06
AT1G54820	1	20447315	20450861	AT1G54780	1	20439433	20441159	-1.25072	3.36e-11	-0.597029	1.24e-08
AT1G32080	1	11537341	11539800	AT1G32060	1	11532532	11534639	-0.625134	9.43e-06	-0.481858	5.27e-05
AT1G01660	1	240056	242608	AT1G01650	1	232840	237817	-2.25236	1.15e-09	0.295412	0.0437626
AT1G51915	1	19293477	19293969	AT1G51890	1	19274657	19278528	5.85047	9.02e-05	1.08672	0.000422622
AT2G18230	2	7931922	7934329	AT2G18180	2	7911053	7913695	-0.462154	0.0062418	-1.49669	0.0176238
AT1G21120	1	7395227	7396773	AT1G21100	1	7386838	7388428	2.22359	4.72e-16	1.03541	1.06e-10
AT1G18835	1	6496097	6496396	AT1G18830	1	6489308	6494218	-1.13188	0.031067	-1.74828	0.00303139
AT1G70160	1	26419948	26422529	AT1G70150	1	26416897	26419588	-0.329698	0.0300613	0.39392	0.0175597
AT1G59660	1	21924692	21929424	AT1G59620	1	21902283	21905685	0.376004	0.0318338	-0.735499	0.00101084
AT1G11990	1	4046245	4049060	AT1G11960	1	4039710	4043880	-2.28766	0.00251449	0.673986	1.57e-05
AT1G78440	1	29511598	29513051	AT1G78430	1	29508958	29510895	-6.92401	1.12e-08	-0.809978	0.000884887
AT1G26150	1	9039627	9043288	AT1G26130	1	9033217	9038577	-0.720108	0.00107859	-0.527024	0.00534624
AT1G32940	1	11937595	11940978	AT1G32910	1	11925425	11926908	0.498969	0.000496122	2.84515	0.0310958
AT1G35560	1	13115825	13117235	AT1G35530	1	13089868	13097078	-0.702618	3.48e-05	-0.689522	0.0107186
AT1G12490	1	4260782	4261869	AT1G12480	1	4257267	4259300	-2.42453	0.0477967	-0.664603	0.0118379
AT1G19790	1	6838119	6840293	AT1G19770	1	6832346	6833837	0.768401	0.00527529	0.613226	0.0113907
AT1G09940	1	3236994	3239554	AT1G09932	1	3230449	3233109	0.430286	0.0466029	1.05558	0.00205406
AT1G52830	1	19672495	19673644	AT1G52820	1	19669182	19670427	1.96577	0.0188516	-2.33092	0.000242632
AT1G03600	1	898875	899655	AT1G03560	1	890155	892410	-0.354146	0.000866332	0.545073	0.00465398
AT2G29320	2	12592147	12593686	AT2G29300	2	12588190	12589759	-1.02976	9.47e-06	-1.42039	1.38e-21
AT2G25790	2	11000598	11004235	AT2G25740	2	10980121	10983945	0.384545	0.0332508	0.403558	0.0191465
AT1G70170	1	26423873	26425356	AT1G70160	1	26419948	26422529	0.495797	0.0389963	-0.329698	0.0300613
AT1G05400	1	1584072	1585421	AT1G05380	1	1576862	1582614	0.828628	0.0150674	0.374722	0.0136982
AT1G11362	1	3824509	3825196	AT1G11340	1	3814115	3817420	3.2062	5.69e-08	-0.399137	0.0333549
AT2G23840	2	10153796	10155647	AT2G23830	2	10143645	10144511	-1.01463	1.03e-08	1.69838	0.0468747
AT1G49975	1	18504801	18505597	AT1G49960	1	18498638	18501886	-0.504608	3.67e-06	-0.833224	0.0117085
AT1G10060	1	3284238	3287107	AT1G10040	1	3275890	3278697	-0.584889	0.00041653	0.526633	0.0217603
AT2G18150	2	7892132	7893653	AT2G18090	2	7864313	7867766	-1.80586	9.79e-19	0.497906	4.65e-05
AT2G35585	2	14936665	14937964	AT2G35540	2	14927157	14928930	-1.30283	0.000398439	0.353741	0.00963759
AT2G23530	2	10020651	10022864	AT2G23520	2	10013990	10016943	-0.750483	0.0224505	-0.28964	0.0339668
AT1G13650	1	4680431	4682196	AT1G13640	1	4677026	4679812	-2.12712	1.09e-33	0.35121	0.0317089
AT1G69570	1	26161527	26163496	AT1G69550	1	26148020	26153555	0.853989	0.000561207	-0.493016	0.000683515
AT2G21730	2	9280043	9281623	AT2G21710	2	9270885	9273418	-2.52864	1.14e-05	0.452461	0.020394
AT1G18660	1	6421116	6425880	AT1G18620	1	6409977	6414451	-0.333929	0.0016324	-0.275743	0.0263911
AT2G26770	2	11404065	11408326	AT2G26750	2	11395895	11397092	-0.531499	1.09e-05	-2.6424	3.88e-06
AT1G59640	1	21909174	21911201	AT1G59620	1	21902283	21905685	-0.917995	0.00754832	-0.735499	0.00101084
AT1G12550	1	4274593	4275981	AT1G12520	1	4267105	4268926	-0.716951	0.000730508	-0.513982	0.00365033
AT1G70820	1	26705517	26708264	AT1G70800	1	26702704	26703790	-0.517462	0.00533317	-1.85902	2.84e-11
AT2G27385	2	11716000	11717432	AT2G27370	2	11708449	11710004	-0.599259	0.00225195	-0.683818	0.0305613
AT1G26390	1	9130016	9131779	AT1G26380	1	9126736	9128528	3.04146	1.66e-19	4.48172	3.57e-49
AT2G26750	2	11395895	11397092	AT2G26730	2	11388406	11391641	-2.6424	3.88e-06	-0.403436	0.010664
AT2G37460	2	15726447	15729098	AT2G37450	2	15722567	15725062	-1.1533	4.38e-07	-0.640112	4.67e-07
AT1G65520	1	24361031	24361993	AT1G65490	1	24354770	24355351	0.53833	0.00770001	-1.07073	0.00297782
AT2G18196	2	7920507	7922326	AT2G18180	2	7911053	7913695	0.486898	0.0105358	-1.49669	0.0176238
AT1G69550	1	26148020	26153555	AT1G69540	1	26145043	26147571	-0.493016	0.000683515	-1.80369	0.00186588
AT1G14910	1	5139711	5143689	AT1G14890	1	5137013	5137957	0.485121	2.83e-05	0.568474	0.00316329
AT1G74490	1	27994699	27996742	AT1G74460	1	27987960	27989801	-0.888234	0.0107655	-0.988059	4.83e-09
AT1G32910	1	11925425	11926908	AT1G32900	1	11920389	11923766	2.84515	0.0310958	-0.538805	0.00149704
AT1G78750	1	29613121	29614695	AT1G78720	1	29605628	29607510	1.03214	0.0105526	-2.50936	4.67e-09
AT2G35960	2	15106939	15107993	AT2G35950	2	15104760	15106088	-1.54134	1.98e-32	-1.09931	0.000622229
AT1G08990	1	2888752	2890959	AT1G08920	1	2867258	2870656	-0.738566	0.00260096	-1.12648	5e-06
AT2G33380	2	14144830	14146471	AT2G33360	2	14139797	14143118	-0.942992	0.00152071	-0.426496	0.0108865
AT1G74650	1	28041190	28042995	AT1G74640	1	28032762	28034773	1.75181	4.33e-07	-0.55252	0.000471422
AT1G24420	1	8656686	8657997	AT1G24400	1	8651406	8653828	-1.61076	0.000296267	-0.478491	0.0330638
AT1G52870	1	19685744	19687907	AT1G52830	1	19672495	19673644	-0.807097	6.18e-13	1.96577	0.0188516
AT1G14260	1	4872855	4874907	AT1G14240	1	4864901	4868000	-0.680453	0.0276368	-0.475739	0.0379675
AT2G18370	2	7980624	7981758	AT2G18328	2	7964392	7964909	-0.605249	0.00834461	-0.986979	0.000305889
AT2G41900	2	17490404	17493922	AT2G41870	2	17470865	17472936	-0.332417	0.0145046	-1.19179	9.53e-10
AT1G30720	1	10898171	10899912	AT1G30700	1	10892569	10894572	1.68744	0.00535089	1.2275	1.14e-09
AT1G05520	1	1630899	1635711	AT1G05490	1	1618601	1623452	0.291117	0.0241334	-0.711736	0.0426352
AT2G26300	2	11196995	11201102	AT2G26280	2	11187732	11191337	0.343009	0.00234141	-0.403619	6.93e-06
AT1G13090	1	4461805	4463543	AT1G13080	1	4459165	4460940	-0.402508	0.0123559	-2.35489	6.03e-44
AT1G78750	1	29613121	29614695	AT1G78710	1	29601252	29604557	1.03214	0.0105526	0.596515	4.45e-06
AT1G66280	1	24706511	24709785	AT1G66270	1	24699989	24703041	0.80597	0.00111192	0.72596	0.00348916
AT1G72200	1	27169794	27171321	AT1G72140	1	27141813	27144490	-0.725389	0.000128124	0.894545	0.000866332
AT2G29680	2	12689548	12693024	AT2G29650	2	12673382	12676049	-1.01315	1.06e-07	-1.17795	3.67e-15
AT1G67105	1	25057478	25058264	AT1G67090	1	25048157	25049424	6.10938	4.17e-196	-0.496674	0.000546419
AT1G18400	1	6331397	6333743	AT1G18390	1	6325641	6330098	2.68495	6.59e-52	0.614597	7.68e-05
AT2G39250	2	16388885	16391073	AT2G39240	2	16384785	16387827	-1.85823	4.82e-12	-2.37174	1.38e-07
AT1G54030	1	20167628	20169600	AT1G54000	1	20154168	20156419	0.482901	1.47e-05	1.06368	6.24e-10
AT1G32960	1	11945306	11948650	AT1G32910	1	11925425	11926908	1.49741	0.00230229	2.84515	0.0310958
AT2G38970	2	16273900	16276872	AT2G38960	2	16265398	16268334	-0.356699	0.0469285	0.399052	0.0306882
AT1G09300	1	3003494	3008213	AT1G09280	1	2998099	3001315	0.651931	0.00017267	0.4023	5.7e-05
AT1G28610	1	10053616	10055731	AT1G28580	1	10044336	10046442	-1.04223	1.19e-10	0.244561	0.0269431
AT1G18835	1	6496097	6496396	AT1G18810	1	6485595	6487030	-1.13188	0.031067	-1.29413	8.84e-21
AT1G03680	1	916818	918064	AT1G03630	1	907641	909376	-0.267773	0.0469195	-0.492266	0.00062767
AT2G23540	2	10024345	10026233	AT2G23530	2	10020651	10022864	-0.942496	3e-05	-0.750483	0.0224505
AT1G59960	1	22071291	22073147	AT1G59950	1	22068032	22070588	0.808151	1.18e-09	3.29292	0.000236295
AT1G78720	1	29605628	29607510	AT1G78700	1	29599348	29601682	-2.50936	4.67e-09	0.602902	6.49e-06
AT2G31060	2	13213099	13218724	AT2G31020	2	13201667	13204821	0.386727	0.0285027	0.661922	1.74e-05
AT2G32190	2	13674497	13675286	AT2G32160	2	13662212	13666269	1.2123	0.00500909	-0.93062	2.34e-07
AT1G51800	1	19214147	19217970	AT1G51790	1	19206710	19211417	1.04438	0.0107319	0.835532	0.0309184
AT2G18630	2	8080502	8082698	AT2G18600	2	8073199	8074982	-0.39025	0.00062784	-0.988014	0.00111551
AT1G09300	1	3003494	3008213	AT1G09240	1	2984880	2986130	0.651931	0.00017267	-1.80654	3.84e-20
AT2G43570	2	18076223	18077463	AT2G43520	2	18068424	18069168	1.53034	0.00983475	0.627942	0.0036673
AT1G69550	1	26148020	26153555	AT1G69530	1	26141835	26143500	-0.493016	0.000683515	-1.26619	9.34e-05
AT2G18190	2	7914304	7915872	AT2G18150	2	7892132	7893653	-3.67447	6.02e-09	-1.80586	9.79e-19
AT1G59700	1	21936295	21937959	AT1G59660	1	21924692	21929424	-0.769562	5.26e-08	0.376004	0.0318338
AT1G27500	1	9551450	9554139	AT1G27480	1	9544513	9546285	0.600133	0.00399702	-0.757735	5.48e-08
AT2G36145	2	15168540	15169514	AT2G36110	2	15161701	15162676	-0.413928	0.00367903	1.62879	0.0221785
AT1G02400	1	486800	489577	AT1G02390	1	480851	483292	0.900035	0.00239648	-1.05551	0.00286507
AT1G70140	1	26412687	26415230	AT1G70110	1	26406237	26408323	-1.7413	1.96e-14	-2.42891	0.0149705
AT2G18196	2	7920507	7922326	AT2G18190	2	7914304	7915872	0.486898	0.0105358	-3.67447	6.02e-09
AT1G65620	1	24398142	24400969	AT1G65610	1	24391678	24395360	-0.494138	0.0401227	0.839373	0.0235222
AT1G29670	1	10375762	10377871	AT1G29600	1	10344045	10346243	0.836532	0.00186584	-2.86309	1.26e-29
AT2G44520	2	18379563	18381942	AT2G44490	2	18364755	18367725	0.251857	0.0377585	0.455532	0.0326411
AT2G41250	2	17200658	17202618	AT2G41240	2	17198281	17199320	-1.46363	2.81e-14	2.35937	0.0258048
AT2G28050	2	11938264	11939653	AT2G28040	2	11936053	11937401	0.659196	0.00179762	1.09154	0.000410154
AT2G18193	2	7917504	7919277	AT2G18180	2	7911053	7913695	-2.01385	1.38e-21	-1.49669	0.0176238
AT1G64710	1	24044544	24046552	AT1G64690	1	24038033	24039177	0.441636	0.0146546	-0.585116	0.00573415
AT1G32090	1	11540024	11544131	AT1G32080	1	11537341	11539800	0.326251	0.0218074	-0.625134	9.43e-06
AT2G03750	2	1147806	1149061	AT2G03730	2	1137610	1140186	-1.16069	4.21e-14	-0.408917	0.0104163
AT1G32080	1	11537341	11539800	AT1G32070	1	11534681	11536338	-0.625134	9.43e-06	-0.267066	0.00704366
AT1G64710	1	24044544	24046552	AT1G64660	1	24028917	24030780	0.441636	0.0146546	0.88306	0.00475227
AT1G64440	1	23937029	23939899	AT1G64430	1	23933379	23936867	-0.392887	0.0385831	-0.205558	0.0350175
AT1G73630	1	27684735	27685453	AT1G73600	1	27669151	27673572	-0.515046	0.0170599	-2.44868	1.68e-17
AT1G06410	1	1954849	1958756	AT1G06390	1	1946787	1950860	0.616773	0.00490502	0.277245	0.0181607
AT2G15820	2	6888539	6891360	AT2G15790	2	6877773	6880898	-0.409103	0.0025991	-0.352036	0.0208248
AT1G75060	1	28181274	28183503	AT1G75040	1	28177702	28178940	-1.4261	1.02e-10	1.09944	0.000150461
AT1G75250	1	28244316	28245501	AT1G75210	1	28223868	28228975	-0.73352	0.00313671	-0.220381	0.0358605
AT1G64370	1	23888919	23889661	AT1G64330	1	23870904	23874198	-1.02906	5.99e-15	0.410086	0.0108458
AT2G34720	2	14649766	14651627	AT2G34690	2	14630306	14632061	-1.08428	3.82e-11	0.318303	0.00492977
AT1G02390	1	480851	483292	AT1G02370	1	474499	476511	-1.05551	0.00286507	0.472706	0.00345575
AT1G07180	1	2204319	2206934	AT1G07160	1	2197907	2199748	-0.902701	0.000310992	1.18537	0.0300479
AT1G75920	1	28504451	28507168	AT1G75900	1	28499059	28501138	-2.05492	0.0252523	-0.830733	1.4e-06
AT2G03810	2	1161028	1164573	AT2G03750	2	1147806	1149061	-0.3522	0.0113293	-1.16069	4.21e-14
AT1G67620	1	25340574	25342082	AT1G67590	1	25333057	25334647	-1.08149	2.96e-06	-0.350526	0.0393118
AT2G37770	2	15834866	15837001	AT2G37720	2	15818081	15821295	-3.02912	8.92e-31	-4.08038	1.56e-05
AT2G18250	2	7939906	7941678	AT2G18240	2	7935284	7936721	0.326906	0.0293195	-0.530187	0.0040917
AT2G01190	2	114974	117640	AT2G01180	2	106899	108803	1.17266	9.39e-09	0.67828	0.00712951
AT1G75100	1	28190815	28193800	AT1G75040	1	28177702	28178940	-0.932631	4.83e-15	1.09944	0.000150461
AT1G69530	1	26141835	26143500	AT1G69520	1	26128287	26129602	-1.26619	9.34e-05	1.18515	2.71e-06
AT1G03900	1	991138	993118	AT1G03870	1	982505	983540	0.305667	0.00443496	1.42233	6.25e-07
AT1G78310	1	29463655	29465053	AT1G78260	1	29446984	29450515	0.327808	0.0376944	0.620201	2.29e-05
AT2G18230	2	7931922	7934329	AT2G18190	2	7914304	7915872	-0.462154	0.0062418	-3.67447	6.02e-09
AT1G20890	1	7265822	7267323	AT1G20870	1	7259101	7260775	0.583973	8.44e-06	-0.938668	0.00140296
AT1G64780	1	24060769	24062630	AT1G64740	1	24050005	24052487	-0.821879	3.09e-07	0.324887	0.0275807
AT1G20870	1	7259101	7260775	AT1G20823	1	7238799	7239669	-0.938668	0.00140296	-0.985762	9.42e-05
AT1G32090	1	11540024	11544131	AT1G32060	1	11532532	11534639	0.326251	0.0218074	-0.481858	5.27e-05
AT1G65800	1	24473120	24476715	AT1G65790	1	24468931	24472329	-1.15929	5.63e-07	-1.18344	0.0367871
AT1G75250	1	28244316	28245501	AT1G75240	1	28241071	28242756	-0.73352	0.00313671	0.878481	1.83e-15
AT1G65900	1	24515836	24518487	AT1G65890	1	24512456	24514659	-1.34598	5.25e-07	-2.10819	0.00519371
AT1G65370	1	24284468	24286145	AT1G65320	1	24259887	24262951	-3.89923	1.05e-72	-0.374056	0.00317373
AT2G32530	2	13809215	13813570	AT2G32500	2	13794425	13797227	-1.55147	2.59e-16	-0.599485	2.66e-06
AT1G11400	1	3837820	3840207	AT1G11362	1	3824509	3825196	0.390115	0.00123556	3.2062	5.69e-08
AT1G75100	1	28190815	28193800	AT1G75060	1	28181274	28183503	-0.932631	4.83e-15	-1.4261	1.02e-10
AT1G02230	1	435173	436776	AT1G02190	1	415078	418010	-1.99293	0.0027671	-1.07369	0.0357437
AT2G03750	2	1147806	1149061	AT2G03710	2	1129267	1131838	-1.16069	4.21e-14	0.522255	4.88e-05
AT1G54050	1	20179421	20180281	AT1G54040	1	20170714	20173949	-0.509338	0.038178	-0.595444	0.010461
AT1G78380	1	29486412	29487906	AT1G78360	1	29482069	29482966	-0.253267	0.00786438	-2.12586	0.0431077
AT1G27670	1	9627571	9628496	AT1G27650	1	9614550	9616357	0.814687	0.000453785	0.300394	0.00373878
AT1G54030	1	20167628	20169600	AT1G54010	1	20158663	20160815	0.482901	1.47e-05	1.42461	2.31e-09
AT2G32240	2	13684298	13691155	AT2G32190	2	13674497	13675286	0.861543	0.00158352	1.2123	0.00500909
AT1G09300	1	3003494	3008213	AT1G09290	1	3001516	3003762	0.651931	0.00017267	0.310684	0.0337547
AT1G51860	1	19257633	19261479	AT1G51850	1	19252846	19256783	-0.439555	0.0164029	0.78237	1.91e-05
AT2G29110	2	12506879	12510552	AT2G29100	2	12501091	12504912	2.32515	0.000395237	3.2682	0.0147079
AT2G29680	2	12689548	12693024	AT2G29670	2	12681957	12685087	-1.01315	1.06e-07	-1.01055	3.53e-07
AT1G54040	1	20170714	20173949	AT1G54010	1	20158663	20160815	-0.595444	0.010461	1.42461	2.31e-09
AT1G12010	1	4056206	4057933	AT1G11990	1	4046245	4049060	1.07358	7.96e-10	-2.28766	0.00251449
AT1G78370	1	29484268	29485290	AT1G78360	1	29482069	29482966	-0.468352	4.35e-05	-2.12586	0.0431077
AT2G42200	2	17587406	17589630	AT2G42170	2	17577713	17580392	-1.1233	0.00274978	0.883416	2.91e-13
AT1G29450	1	10305950	10306499	AT1G29430	1	10302649	10303335	0.645884	0.000232697	0.866484	1.79e-07
AT1G67620	1	25340574	25342082	AT1G67600	1	25336422	25337662	-1.08149	2.96e-06	-1.34981	9.89e-07
AT1G10380	1	3400605	3402324	AT1G10370	1	3397080	3398358	-0.462127	0.0402083	-1.06247	0.000174981
AT1G17180	1	5872144	5873086	AT1G17170	1	5869845	5870840	1.30232	3.3e-07	0.937854	9.68e-09
AT1G69570	1	26161527	26163496	AT1G69540	1	26145043	26147571	0.853989	0.000561207	-1.80369	0.00186588
AT1G07450	1	2287925	2289336	AT1G07440	1	2286148	2287730	-5.99706	1.79e-27	-2.16387	1.34e-52
AT2G28270	2	12053541	12054398	AT2G28260	2	12049988	12052453	-1.24787	0.0326296	-0.635342	0.000477786
AT1G70250	1	26452964	26456088	AT1G70230	1	26450244	26451945	-1.03849	1.4e-10	-0.586368	0.00060071
AT1G48760	1	18035966	18039405	AT1G48745	1	18030703	18031439	0.381847	0.0283152	-0.595714	0.0257367
AT1G05420	1	1590072	1590753	AT1G05400	1	1584072	1585421	0.785548	0.0391745	0.828628	0.0150674
AT1G58410	1	21701184	21704255	AT1G58400	1	21696164	21699118	0.504649	0.0176129	0.700747	8.73e-05
AT2G32550	2	13819378	13822839	AT2G32530	2	13809215	13813570	-3.59325	2.77e-30	-1.55147	2.59e-16
AT2G18190	2	7914304	7915872	AT2G18180	2	7911053	7913695	-3.67447	6.02e-09	-1.49669	0.0176238
AT1G52200	1	19442067	19443529	AT1G52160	1	19420714	19424439	0.977289	0.00287335	0.433872	0.00709424
AT1G67860	1	25444804	25445263	AT1G67856	1	25442403	25443019	0.421159	0.000314901	-1.67824	0.0170524
AT1G55380	1	20676621	20678607	AT1G55370	1	20674782	20676449	0.88732	0.00660055	-0.440408	0.000731389
AT2G26760	2	11401328	11403427	AT2G26750	2	11395895	11397092	-0.574595	0.000168033	-2.6424	3.88e-06
AT1G11990	1	4046245	4049060	AT1G11950	1	4034586	4038758	-2.28766	0.00251449	0.417005	0.0406431
AT1G65920	1	24525101	24529294	AT1G65890	1	24512456	24514659	0.572317	0.0250739	-2.10819	0.00519371
AT1G14270	1	4874874	4877248	AT1G14240	1	4864901	4868000	-0.301283	0.013643	-0.475739	0.0379675
AT1G59790	1	22001503	22003385	AT1G59760	1	21984444	21990175	3.29876	0.032742	0.227384	0.0246039
AT1G51310	1	19018978	19021804	AT1G51270	1	19007509	19011272	0.372728	0.0355299	0.459494	0.0215605
AT1G17190	1	5875349	5876545	AT1G17180	1	5872144	5873086	-0.503147	0.0364215	1.30232	3.3e-07
AT1G59970	1	22073533	22074876	AT1G59950	1	22068032	22070588	0.569976	0.00926212	3.29292	0.000236295
AT1G21110	1	7389980	7391553	AT1G21100	1	7386838	7388428	1.14258	2.49e-10	1.03541	1.06e-10
AT1G52220	1	19453568	19454697	AT1G52200	1	19442067	19443529	-0.346489	2.67e-05	0.977289	0.00287335
AT1G70150	1	26416897	26419588	AT1G70140	1	26412687	26415230	0.39392	0.0175597	-1.7413	1.96e-14
AT2G36770	2	15415138	15416766	AT2G36750	2	15410461	15412038	0.829702	4.76e-05	-2.78701	7.06e-22
AT1G68850	1	25883615	25885247	AT1G68830	1	25872444	25875550	-0.859001	2.87e-06	-0.565365	3.43e-07
AT2G36910	2	15502013	15507320	AT2G36895	2	15489027	15490347	-0.466847	0.000985809	-0.464333	2.08e-05
AT1G33600	1	12180775	12182363	AT1G33560	1	12168767	12172005	0.406504	0.0396911	-0.628494	0.0148405
AT1G10070	1	3288086	3290471	AT1G10060	1	3284238	3287107	1.62158	0.0378394	-0.584889	0.00041653
AT2G35980	2	15110587	15111471	AT2G35950	2	15104760	15106088	1.83046	6.03e-15	-1.09931	0.000622229
AT1G10657	1	3530466	3531842	AT1G10650	1	3524017	3526346	-1.35171	2.4e-09	-0.66219	4.65e-06
AT1G30640	1	10860654	10864700	AT1G30620	1	10854548	10858244	0.699862	0.00531702	0.453303	0.00224091
AT2G44370	2	18321993	18323121	AT2G44300	2	18307308	18308349	1.38171	0.000122711	-0.972529	1.39e-06
AT1G64430	1	23933379	23936867	AT1G64390	1	23911118	23915229	-0.205558	0.0350175	-0.753689	0.000305981
AT1G78610	1	29569029	29572126	AT1G78580	1	29552339	29560912	-0.308813	0.0261634	-0.979375	4.07e-10
AT1G03620	1	904318	906186	AT1G03560	1	890155	892410	0.492584	0.00301737	0.545073	0.00465398
AT2G30150	2	12874705	12876122	AT2G30130	2	12868629	12869724	-0.60339	6e-08	1.08933	0.0181316
AT2G23540	2	10024345	10026233	AT2G23520	2	10013990	10016943	-0.942496	3e-05	-0.28964	0.0339668
AT2G42220	2	17592037	17593500	AT2G42190	2	17582868	17584194	-0.557256	1.54e-12	-0.528411	1.96e-06
AT1G78370	1	29484268	29485290	AT1G78310	1	29463655	29465053	-0.468352	4.35e-05	0.327808	0.0376944
AT1G65190	1	24215643	24217328	AT1G65150	1	24203840	24205775	-0.391738	0.00387901	-1.07517	1.63e-07
AT2G32295	2	13719297	13722179	AT2G32290	2	13714546	13716929	-0.558938	0.00304811	-1.74746	5.87e-19
AT2G32560	2	13824793	13826986	AT2G32540	2	13814685	13818289	-0.368806	0.000286804	-0.584263	0.000100646
AT1G72140	1	27141813	27144490	AT1G72130	1	27137180	27139384	0.894545	0.000866332	-1.25813	2.48e-37
AT2G36800	2	15423379	15425016	AT2G36750	2	15410461	15412038	-2.54263	7.68e-44	-2.78701	7.06e-22
AT1G66110	1	24609093	24610232	AT1G66100	1	24605670	24606537	-5.24297	0.00608928	-0.872495	1.32e-07
AT1G49200	1	18198226	18199168	AT1G49160	1	18179303	18182391	0.778059	0.00445344	-2.22115	5.05e-26
AT2G18370	2	7980624	7981758	AT2G18330	2	7965634	7969105	-0.605249	0.00834461	0.34352	0.0453729
AT2G32540	2	13814685	13818289	AT2G32500	2	13794425	13797227	-0.584263	0.000100646	-0.599485	2.66e-06
AT1G51920	1	19294228	19294579	AT1G51890	1	19274657	19278528	4.06387	3.27e-07	1.08672	0.000422622
AT1G51940	1	19295903	19299118	AT1G51850	1	19252846	19256783	0.49184	0.000157179	0.78237	1.91e-05
AT1G73610	1	27678376	27679807	AT1G73600	1	27669151	27673572	1.98176	0.00340891	-2.44868	1.68e-17
AT1G14030	1	4805305	4807517	AT1G14010	1	4800168	4801850	-0.428001	0.00226882	0.422277	0.00345402
AT1G66940	1	24973027	24974791	AT1G66920	1	24965303	24967522	0.462138	0.0038007	0.899885	0.0111092
AT1G72220	1	27184280	27185830	AT1G72200	1	27169794	27171321	-1.44425	0.000426863	-0.725389	0.000128124
AT1G52120	1	19396080	19398244	AT1G52100	1	19383121	19385602	3.14292	1.49e-05	1.36521	3.02e-14
AT1G64385	1	23900034	23902281	AT1G64380	1	23890645	23892173	0.289584	0.0166568	-1.68197	4.13e-08
AT1G69540	1	26145043	26147571	AT1G69523	1	26129550	26131292	-1.80369	0.00186588	-1.02678	2.14e-10
AT1G56670	1	21241672	21244047	AT1G56650	1	21233594	21235137	-1.30833	6.39e-08	-1.89113	0.000104825
AT1G21100	1	7386838	7388428	AT1G21065	1	7374209	7375789	1.03541	1.06e-10	-0.244862	0.0173954
AT1G13670	1	4688155	4688966	AT1G13640	1	4677026	4679812	0.542409	0.00105104	0.35121	0.0317089
AT1G22400	1	7903659	7906673	AT1G22360	1	7894857	7897591	1.80749	0.0420899	1.05469	2.92e-06
AT1G16320	1	5580854	5582143	AT1G16310	1	5578430	5580693	-0.725235	3.28e-09	-0.67925	0.00235807
AT1G70170	1	26423873	26425356	AT1G70150	1	26416897	26419588	0.495797	0.0389963	0.39392	0.0175597
AT2G29310	2	12590057	12591363	AT2G29300	2	12588190	12589759	-0.931912	9.02e-22	-1.42039	1.38e-21
AT1G12520	1	4267105	4268926	AT1G12490	1	4260782	4261869	-0.513982	0.00365033	-2.42453	0.0477967
AT1G51940	1	19295903	19299118	AT1G51915	1	19293477	19293969	0.49184	0.000157179	5.85047	9.02e-05
AT1G51940	1	19295903	19299118	AT1G51920	1	19294228	19294579	0.49184	0.000157179	4.06387	3.27e-07
AT1G72230	1	27188065	27189244	AT1G72220	1	27184280	27185830	-0.773676	3.66e-05	-1.44425	0.000426863
AT1G15520	1	5331857	5338326	AT1G15510	1	5329110	5331711	2.4801	8.38e-05	0.432497	0.044192
AT2G21890	2	9331088	9332646	AT2G21880	2	9324632	9326321	-2.01044	0.00216169	-0.748982	0.017608
AT1G80150	1	30148387	30150517	AT1G80110	1	30135380	30136956	0.652969	0.000131797	-1.06886	5.41e-06
AT1G62630	1	23185911	23188593	AT1G62620	1	23182643	23184991	-1.30592	2.42e-07	-1.51249	0.00455608
AT1G54000	1	20154168	20156419	AT1G53920	1	20137711	20139637	1.06368	6.24e-10	-0.403174	0.0487371
AT2G44300	2	18307308	18308349	AT2G44290	2	18305200	18306251	-0.972529	1.39e-06	-1.10167	2.54e-06
AT1G33790	1	12256663	12260605	AT1G33770	1	12242125	12244462	2.00177	2.19e-12	-2.31022	1.75e-15
AT1G27480	1	9544513	9546285	AT1G27460	1	9534531	9537561	-0.757735	5.48e-08	0.545292	0.00335487
AT1G13080	1	4459165	4460940	AT1G13040	1	4447646	4449200	-2.35489	6.03e-44	0.393369	0.029208
AT2G35880	2	15062987	15065870	AT2G35830	2	15052198	15053275	0.65599	1.75e-05	-0.576868	6.13e-10
AT1G22160	1	7823148	7823971	AT1G22140	1	7814762	7815631	-1.27419	1.21e-08	-1.28538	3.2e-18
AT1G20880	1	7262042	7265438	AT1G20870	1	7259101	7260775	-0.540835	4.32e-05	-0.938668	0.00140296
AT2G30790	2	13118936	13120090	AT2G30770	2	13109793	13112011	-0.414201	0.00336002	3.96834	0.00372536
AT1G59660	1	21924692	21929424	AT1G59640	1	21909174	21911201	0.376004	0.0318338	-0.917995	0.00754832
AT1G21130	1	7399061	7400605	AT1G21120	1	7395227	7396773	0.753882	0.00013956	2.22359	4.72e-16
AT1G53645	1	20026146	20028635	AT1G53625	1	20014409	20014923	0.313637	0.0096696	1.8338	2.71e-09
AT2G43620	2	18093769	18095025	AT2G43590	2	18081330	18082767	4.34721	4.24e-42	3.40039	2.32e-06
AT1G78460	1	29518315	29519323	AT1G78440	1	29511598	29513051	0.723056	0.000229783	-6.92401	1.12e-08
AT1G75280	1	28251959	28253619	AT1G75240	1	28241071	28242756	-0.968975	1.48e-10	0.878481	1.83e-15
AT1G51890	1	19274657	19278528	AT1G51850	1	19252846	19256783	1.08672	0.000422622	0.78237	1.91e-05
AT1G69810	1	26277237	26279118	AT1G69790	1	26266608	26269013	0.526902	0.0158012	-0.666182	0.0130089
AT2G18193	2	7917504	7919277	AT2G18150	2	7892132	7893653	-2.01385	1.38e-21	-1.80586	9.79e-19
AT2G35840	2	15053622	15057426	AT2G35830	2	15052198	15053275	-0.663081	2.12e-09	-0.576868	6.13e-10
AT1G15530	1	5339960	5341931	AT1G15520	1	5331857	5338326	0.51549	0.0040158	2.4801	8.38e-05
AT1G67840	1	25434101	25437075	AT1G67810	1	25426487	25427349	-0.400514	0.00621871	0.923038	6.5e-05
AT2G24150	2	10265483	10267405	AT2G24140	2	10262553	10264033	-0.461896	3.27e-07	-0.714915	0.0283515
AT2G44530	2	18383514	18386143	AT2G44490	2	18364755	18367725	0.274002	0.0328863	0.455532	0.0326411
AT1G29720	1	10393796	10399873	AT1G29670	1	10375762	10377871	-1.92311	1.43e-11	0.836532	0.00186584
AT1G78370	1	29484268	29485290	AT1G78290	1	29457204	29459400	-0.468352	4.35e-05	-0.876511	5.66e-05
AT1G54040	1	20170714	20173949	AT1G54030	1	20167628	20169600	-0.595444	0.010461	0.482901	1.47e-05
AT1G59720	1	21939751	21941784	AT1G59700	1	21936295	21937959	-0.589395	0.000196955	-0.769562	5.26e-08
AT2G29360	2	12603802	12605271	AT2G29320	2	12592147	12593686	-0.912723	1.13e-15	-1.02976	9.47e-06
AT1G73860	1	27770985	27776857	AT1G73840	1	27763684	27766364	-0.715649	0.0176129	0.296094	0.0323317
AT1G30260	1	10651050	10651728	AT1G30250	1	10646986	10647511	-1.13788	4.16e-09	-2.6555	0.00142519
AT2G32510	2	13798820	13799939	AT2G32500	2	13794425	13797227	-1.20802	6.78e-05	-0.599485	2.66e-06
AT2G35585	2	14936665	14937964	AT2G35550	2	14929280	14930892	-1.30283	0.000398439	-5.71097	9.43e-14
AT1G62750	1	23233433	23236447	AT1G62710	1	23223873	23226916	-0.541918	0.000516574	-0.818582	0.0035433
AT1G29280	1	10236366	10237467	AT1G29240	1	10216778	10219846	0.340308	0.02712	-0.754986	9.64e-05
AT1G13100	1	4463923	4465538	AT1G13080	1	4459165	4460940	-0.503891	0.0401562	-2.35489	6.03e-44
AT1G07090	1	2173951	2174894	AT1G07040	1	2160937	2163308	0.981745	7.02e-19	0.558036	0.00263305
AT1G53645	1	20026146	20028635	AT1G53600	1	20001262	20003416	0.313637	0.0096696	0.5994	0.0277605
AT1G17070	1	5837589	5840332	AT1G17050	1	5829079	5831343	0.449526	0.00243196	-1.19354	2.35e-32
AT2G41050	2	17123189	17126349	AT2G41000	2	17111444	17113636	-0.674757	0.000695842	-0.462243	0.031367
AT1G14030	1	4805305	4807517	AT1G13990	1	4794755	4796597	-0.428001	0.00226882	0.290732	0.00776768
AT2G30210	2	12887445	12889874	AT2G30170	2	12879674	12881503	-1.37546	1.7e-18	-0.380041	0.000892652
AT1G78750	1	29613121	29614695	AT1G78700	1	29599348	29601682	1.03214	0.0105526	0.602902	6.49e-06
AT1G59620	1	21902283	21905685	AT1G59580	1	21884042	21886051	-0.735499	0.00101084	0.242596	0.0153757
AT1G03905	1	993399	995784	AT1G03870	1	982505	983540	0.524168	0.0104746	1.42233	6.25e-07
AT2G27430	2	11729825	11733210	AT2G27370	2	11708449	11710004	0.636047	0.0214802	-0.683818	0.0305613
AT2G44490	2	18364755	18367725	AT2G44460	2	18346438	18349966	0.455532	0.0326411	-1.07175	0.0377586
AT1G02410	1	490924	492926	AT1G02390	1	480851	483292	-0.303822	0.0244845	-1.05551	0.00286507
AT1G64740	1	24050005	24052487	AT1G64660	1	24028917	24030780	0.324887	0.0275807	0.88306	0.00475227
AT2G43570	2	18076223	18077463	AT2G43535	2	18070972	18071676	1.53034	0.00983475	0.533224	0.0170399
AT2G35960	2	15106939	15107993	AT2G35930	2	15082854	15084473	-1.54134	1.98e-32	0.834056	0.0147782
AT1G79060	1	29741747	29743600	AT1G79040	1	29736015	29737009	-0.466147	0.00204599	-0.327507	0.0248811
AT2G35910	2	15072931	15074081	AT2G35830	2	15052198	15053275	0.451673	0.00706292	-0.576868	6.13e-10
AT1G75280	1	28251959	28253619	AT1G75250	1	28244316	28245501	-0.968975	1.48e-10	-0.73352	0.00313671
AT2G21950	2	9353173	9354645	AT2G21880	2	9324632	9326321	0.265194	0.0186336	-0.748982	0.017608
AT2G43535	2	18070972	18071676	AT2G43500	2	18061924	18066639	0.533224	0.0170399	-0.602692	0.0351472
AT1G76110	1	28555041	28557586	AT1G76090	1	28550408	28551781	-0.717096	9.27e-05	0.738007	0.0358718
AT1G51890	1	19274657	19278528	AT1G51860	1	19257633	19261479	1.08672	0.000422622	-0.439555	0.0164029
AT1G74470	1	27991164	27993006	AT1G74458	1	27986956	27987675	-0.364109	0.00780841	-0.508641	0.00666523
AT2G29330	2	12594589	12596330	AT2G29310	2	12590057	12591363	0.638606	0.0142593	-0.931912	9.02e-22
AT1G30220	1	10632820	10635471	AT1G30160	1	10606209	10607810	-1.36356	9.43e-06	1.23637	0.00037536
AT2G18196	2	7920507	7922326	AT2G18193	2	7917504	7919277	0.486898	0.0105358	-2.01385	1.38e-21
AT1G22380	1	7900386	7902332	AT1G22330	1	7886541	7889534	1.38745	0.00782881	0.567428	0.000438852
AT1G18890	1	6522763	6525962	AT1G18835	1	6496097	6496396	0.480339	0.041197	-1.13188	0.031067
AT2G42220	2	17592037	17593500	AT2G42200	2	17587406	17589630	-0.557256	1.54e-12	-1.1233	0.00274978
AT2G29670	2	12681957	12685087	AT2G29650	2	12673382	12676049	-1.01055	3.53e-07	-1.17795	3.67e-15
AT2G40360	2	16852879	16856690	AT2G40320	2	16840146	16842282	0.387069	0.000831476	-0.410196	0.0380839
AT1G64380	1	23890645	23892173	AT1G64355	1	23886083	23887212	-1.68197	4.13e-08	-0.331281	0.0082122
AT1G03905	1	993399	995784	AT1G03900	1	991138	993118	0.524168	0.0104746	0.305667	0.00443496
AT1G52830	1	19672495	19673644	AT1G52800	1	19664043	19665362	1.96577	0.0188516	-2.49501	4.92e-06
AT1G74460	1	27987960	27989801	AT1G74430	1	27975178	27977434	-0.988059	4.83e-09	-1.04945	0.00534822
AT1G75100	1	28190815	28193800	AT1G75080	1	28185503	28188075	-0.932631	4.83e-15	0.357541	0.00363458
AT1G02390	1	480851	483292	AT1G02360	1	471989	473160	-1.05551	0.00286507	0.731804	0.000115959
AT2G27430	2	11729825	11733210	AT2G27420	2	11726143	11727614	0.636047	0.0214802	-3.21981	2.57e-13
AT1G35250	1	12932940	12934479	AT1G35220	1	12908913	12914802	-0.818765	0.00304906	0.298583	0.0123477
AT1G78720	1	29605628	29607510	AT1G78680	1	29593755	29596270	-2.50936	4.67e-09	-0.427899	0.00230229
AT1G57800	1	21408622	21412283	AT1G57770	1	21395195	21398280	5.91606	0.000486253	-0.457451	0.0471768
AT1G17190	1	5875349	5876545	AT1G17170	1	5869845	5870840	-0.503147	0.0364215	0.937854	9.68e-09
AT1G14890	1	5137013	5137957	AT1G14870	1	5128374	5129523	0.568474	0.00316329	1.43954	7.35e-11
AT2G35610	2	14947364	14951247	AT2G35585	2	14936665	14937964	0.228437	0.0390627	-1.30283	0.000398439
AT1G23030	1	8156645	8159077	AT1G23020	1	8150069	8153530	0.469813	0.0238031	0.64698	6.75e-05
AT2G30790	2	13118936	13120090	AT2G30750	2	13099335	13101413	-0.414201	0.00336002	4.62437	2.23e-67
AT2G34660	2	14602469	14612565	AT2G34630	2	14578539	14581727	-0.356981	0.00375923	-0.300412	0.00386064
AT1G67865	1	25446288	25446737	AT1G67856	1	25442403	25443019	-0.668385	5.51e-08	-1.67824	0.0170524
AT1G78370	1	29484268	29485290	AT1G78340	1	29472891	29473863	-0.468352	4.35e-05	0.508845	0.0270668
AT1G25450	1	8938478	8940387	AT1G25440	1	8933715	8935460	0.379769	0.0298184	-0.789564	0.00336972
AT1G55450	1	20704917	20706893	AT1G55380	1	20676621	20678607	1.04429	1.28e-05	0.88732	0.00660055
AT2G36910	2	15502013	15507320	AT2G36900	2	15491039	15492822	-0.466847	0.000985809	0.412896	0.00452225
AT1G09300	1	3003494	3008213	AT1G09260	1	2993403	2993820	0.651931	0.00017267	7.03314	3.05e-07
AT1G64740	1	24050005	24052487	AT1G64710	1	24044544	24046552	0.324887	0.0275807	0.441636	0.0146546
AT2G18180	2	7911053	7913695	AT2G18120	2	7876614	7877681	-1.49669	0.0176238	-1.37991	0.00691187
AT1G61640	1	22746371	22749184	AT1G61620	1	22737542	22739430	0.513055	0.0278256	0.252203	0.0375491
AT2G33400	2	14152705	14154530	AT2G33380	2	14144830	14146471	-0.3935	0.0097113	-0.942992	0.00152071
AT2G30770	2	13109793	13112011	AT2G30750	2	13099335	13101413	3.96834	0.00372536	4.62437	2.23e-67
AT2G27420	2	11726143	11727614	AT2G27370	2	11708449	11710004	-3.21981	2.57e-13	-0.683818	0.0305613
AT1G13090	1	4461805	4463543	AT1G13040	1	4447646	4449200	-0.402508	0.0123559	0.393369	0.029208
AT2G32550	2	13819378	13822839	AT2G32500	2	13794425	13797227	-3.59325	2.77e-30	-0.599485	2.66e-06
AT1G05540	1	1639285	1640811	AT1G05490	1	1618601	1623452	-1.62535	2.47e-07	-0.711736	0.0426352
AT2G43590	2	18081330	18082767	AT2G43510	2	18067171	18067802	3.40039	2.32e-06	2.74899	4.83e-20
AT1G64690	1	24038033	24039177	AT1G64660	1	24028917	24030780	-0.585116	0.00573415	0.88306	0.00475227
AT2G36430	2	15290203	15291763	AT2G36410	2	15278768	15280688	-0.756708	2.92e-05	0.442557	0.0309534
AT1G74490	1	27994699	27996742	AT1G74470	1	27991164	27993006	-0.888234	0.0107655	-0.364109	0.00780841
AT1G64680	1	24036020	24037401	AT1G64660	1	24028917	24030780	-0.369056	0.000620749	0.88306	0.00475227
AT1G14920	1	5149225	5151354	AT1G14890	1	5137013	5137957	0.573119	8.07e-05	0.568474	0.00316329
AT1G75200	1	28220625	28223709	AT1G75180	1	28215835	28218801	0.466411	0.000973232	-0.426273	0.00295832
AT2G27420	2	11726143	11727614	AT2G27385	2	11716000	11717432	-3.21981	2.57e-13	-0.599259	0.00225195
AT1G65920	1	24525101	24529294	AT1G65900	1	24515836	24518487	0.572317	0.0250739	-1.34598	5.25e-07
AT1G66140	1	24619836	24622004	AT1G66130	1	24614961	24616930	-0.399908	0.0479705	-0.85675	2.75e-06
AT1G14080	1	4822527	4824414	AT1G14030	1	4805305	4807517	0.528662	0.0416994	-0.428001	0.00226882
AT2G18150	2	7892132	7893653	AT2G18120	2	7876614	7877681	-1.80586	9.79e-19	-1.37991	0.00691187
AT1G09290	1	3001516	3003762	AT1G09240	1	2984880	2986130	0.310684	0.0337547	-1.80654	3.84e-20
AT1G65520	1	24361031	24361993	AT1G65500	1	24357866	24358616	0.53833	0.00770001	1.9056	1.94e-07
AT2G43590	2	18081330	18082767	AT2G43535	2	18070972	18071676	3.40039	2.32e-06	0.533224	0.0170399
AT1G54575	1	20387059	20387710	AT1G54540	1	20367571	20368434	-0.409523	0.0304627	-1.13984	3.48e-05
AT1G73870	1	27779165	27780676	AT1G73860	1	27770985	27776857	-1.07886	6.92e-12	-0.715649	0.0176129
AT1G36070	1	13466910	13470936	AT1G36060	1	13454495	13456331	0.32403	0.0164454	0.864495	0.000392886
AT1G35460	1	13039915	13042102	AT1G35420	1	13026237	13027684	-0.325961	0.0413922	-0.273753	0.0223059
AT1G05320	1	1553602	1557733	AT1G05300	1	1545105	1547849	-0.555684	4.6e-05	1.16213	0.00013639
AT1G07180	1	2204319	2206934	AT1G07170	1	2200122	2201265	-0.902701	0.000310992	0.424543	0.00177222
AT1G07430	1	2280834	2282828	AT1G07400	1	2274942	2275758	-2.43501	2.79e-07	2.98498	6.65e-51
AT1G29450	1	10305950	10306499	AT1G29440	1	10304506	10305108	0.645884	0.000232697	1.02571	6.54e-15
AT2G18250	2	7939906	7941678	AT2G18230	2	7931922	7934329	0.326906	0.0293195	-0.462154	0.0062418
AT2G28270	2	12053541	12054398	AT2G28250	2	12043481	12046537	-1.24787	0.0326296	-0.670493	0.000834896
AT1G66470	1	24795213	24796988	AT1G66460	1	24789734	24791988	0.763776	0.0360235	-0.980949	0.0128286
AT1G10690	1	3549991	3550632	AT1G10682	1	3544990	3545471	-0.92647	4.3e-06	-0.370722	0.0213292
AT2G43590	2	18081330	18082767	AT2G43520	2	18068424	18069168	3.40039	2.32e-06	0.627942	0.0036673
AT1G29440	1	10304506	10305108	AT1G29430	1	10302649	10303335	1.02571	6.54e-15	0.866484	1.79e-07
AT1G12030	1	4064666	4066341	AT1G11990	1	4046245	4049060	1.4671	0.00121697	-2.28766	0.00251449
AT1G73860	1	27770985	27776857	AT1G73810	1	27752399	27755297	-0.715649	0.0176129	1.46877	7.41e-05
AT2G18230	2	7931922	7934329	AT2G18196	2	7920507	7922326	-0.462154	0.0062418	0.486898	0.0105358
AT1G66940	1	24973027	24974791	AT1G66890	1	24957557	24958114	0.462138	0.0038007	-0.344355	0.0417005
AT1G52820	1	19669182	19670427	AT1G52800	1	19664043	19665362	-2.33092	0.000242632	-2.49501	4.92e-06
AT2G21880	2	9324632	9326321	AT2G21860	2	9318257	9320002	-0.748982	0.017608	-0.524555	8.14e-06
AT1G22650	1	8013381	8015991	AT1G22640	1	8006194	8007428	-0.678582	1.85e-07	-1.13655	5.62e-08
AT2G39240	2	16384785	16387827	AT2G39220	2	16374895	16377020	-2.37174	1.38e-07	-0.71653	1.24e-05
AT1G22160	1	7823148	7823971	AT1G22150	1	7818360	7821344	-1.27419	1.21e-08	-3.17993	0.0132584
AT1G06040	1	1828412	1829890	AT1G05960	1	1807972	1815474	-0.499346	3.96e-08	0.32786	0.00653417
AT2G27402	2	11723524	11724362	AT2G27385	2	11716000	11717432	-2.56378	1.59e-41	-0.599259	0.00225195
AT1G26410	1	9138674	9140439	AT1G26390	1	9130016	9131779	3.58109	3.07e-36	3.04146	1.66e-19
AT1G02410	1	490924	492926	AT1G02400	1	486800	489577	-0.303822	0.0244845	0.900035	0.00239648
AT1G11410	1	3841285	3844432	AT1G11380	1	3832622	3834191	-1.03361	1.23e-08	0.629575	0.0326296
AT2G34150	2	14419294	14423478	AT2G34140	2	14413757	14414765	-0.812541	8.56e-05	0.622638	0.0344605
AT2G30210	2	12887445	12889874	AT2G30150	2	12874705	12876122	-1.37546	1.7e-18	-0.60339	6e-08
AT2G20120	2	8687353	8689476	AT2G20100	2	8678049	8682112	0.60546	1.71e-05	-0.590899	0.0289748
AT1G52855	1	19682945	19683498	AT1G52830	1	19672495	19673644	-1.27492	0.00580086	1.96577	0.0188516
AT1G62975	1	23328849	23330776	AT1G62960	1	23318186	23320316	-1.084	1.22e-06	-0.385557	0.00265637
AT1G69900	1	26326380	26327831	AT1G69880	1	26321478	26322993	0.892441	0.0230635	1.73794	0.000953452
AT2G41870	2	17470865	17472936	AT2G41835	2	17457785	17459568	-1.19179	9.53e-10	0.385593	0.0439351
AT2G20100	2	8678049	8682112	AT2G20060	2	8659042	8661489	-0.590899	0.0289748	0.328859	0.0210363
AT1G20190	1	6998488	6999817	AT1G20140	1	6986357	6987270	-2.05694	1.04e-16	-1.02002	9.63e-11
AT2G18600	2	8073199	8074982	AT2G18560	2	8059287	8061056	-0.988014	0.00111551	-0.58493	4.6e-05
AT2G42200	2	17587406	17589630	AT2G42110	2	17562151	17562733	-1.1233	0.00274978	-0.648471	0.0218429
AT2G39530	2	16498485	16499471	AT2G39518	2	16495874	16496995	1.65074	1.25e-08	1.89024	0.00413411
AT1G22590	1	7981739	7984334	AT1G22530	1	7955492	7958442	-0.489863	6.6e-05	0.970142	0.00458783
AT1G14240	1	4864901	4868000	AT1G14210	1	4856777	4857964	-0.475739	0.0379675	0.395646	0.0101975
AT1G66920	1	24965303	24967522	AT1G66900	1	24959333	24961616	0.899885	0.0111092	-0.397291	0.00093631
AT2G01590	2	266629	267798	AT2G01580	2	265043	265905	-0.826911	2.39e-14	-1.10639	0.000310153
AT1G35420	1	13026237	13027684	AT1G35350	1	12981250	12984583	-0.273753	0.0223059	0.940914	0.00327694
AT2G18330	2	7965634	7969105	AT2G18250	2	7939906	7941678	0.34352	0.0453729	0.326906	0.0293195
AT1G70230	1	26450244	26451945	AT1G70140	1	26412687	26415230	-0.586368	0.00060071	-1.7413	1.96e-14
AT2G40320	2	16840146	16842282	AT2G40260	2	16816817	16818473	-0.410196	0.0380839	-0.396653	0.0188095
AT2G18370	2	7980624	7981758	AT2G18350	2	7971016	7972081	-0.605249	0.00834461	0.703183	9.9e-07
AT1G03680	1	916818	918064	AT1G03600	1	898875	899655	-0.267773	0.0469195	-0.354146	0.000866332
AT1G64780	1	24060769	24062630	AT1G64710	1	24044544	24046552	-0.821879	3.09e-07	0.441636	0.0146546
AT1G67865	1	25446288	25446737	AT1G67860	1	25444804	25445263	-0.668385	5.51e-08	0.421159	0.000314901
AT1G62085	1	22948756	22950142	AT1G62030	1	22924249	22926598	-0.60439	0.000158135	-1.03243	3.25e-06
AT1G79075	1	29745938	29746842	AT1G79060	1	29741747	29743600	-0.519406	0.00229286	-0.466147	0.00204599
AT1G67750	1	25401587	25403503	AT1G67730	1	25391459	25393610	-0.971424	7.87e-05	-0.22008	0.0355266
AT1G20870	1	7259101	7260775	AT1G20840	1	7244938	7248143	-0.938668	0.00140296	0.555826	0.000309705
AT1G78510	1	29535284	29537417	AT1G78490	1	29528252	29530665	-0.935671	1.03e-14	0.375194	0.0222334
AT1G02660	1	571954	574981	AT1G02640	1	564204	567769	0.919383	0.00836685	1.17371	0.000433525
AT1G66130	1	24614961	24616930	AT1G66110	1	24609093	24610232	-0.85675	2.75e-06	-5.24297	0.00608928
AT2G36800	2	15423379	15425016	AT2G36770	2	15415138	15416766	-2.54263	7.68e-44	0.829702	4.76e-05
AT2G29330	2	12594589	12596330	AT2G29300	2	12588190	12589759	0.638606	0.0142593	-1.42039	1.38e-21
AT1G73860	1	27770985	27776857	AT1G73830	1	27759972	27761588	-0.715649	0.0176129	0.777715	2.56e-05
AT1G18180	1	6255829	6257900	AT1G18150	1	6244297	6247812	-0.595214	0.0348562	-0.566818	3.24e-05
AT1G07210	1	2215222	2216982	AT1G07180	1	2204319	2206934	0.348181	0.0032519	-0.902701	0.000310992
AT1G17220	1	5885082	5890470	AT1G17190	1	5875349	5876545	-0.610053	2.57e-06	-0.503147	0.0364215
AT2G43590	2	18081330	18082767	AT2G43570	2	18076223	18077463	3.40039	2.32e-06	1.53034	0.00983475
AT2G03730	2	1137610	1140186	AT2G03710	2	1129267	1131838	-0.408917	0.0104163	0.522255	4.88e-05
AT1G26420	1	9141566	9143304	AT1G26390	1	9130016	9131779	2.98827	1.05e-30	3.04146	1.66e-19
AT2G29330	2	12594589	12596330	AT2G29320	2	12592147	12593686	0.638606	0.0142593	-1.02976	9.47e-06
AT1G70170	1	26423873	26425356	AT1G70140	1	26412687	26415230	0.495797	0.0389963	-1.7413	1.96e-14
AT1G73880	1	27784980	27786804	AT1G73860	1	27770985	27776857	0.858565	0.00434231	-0.715649	0.0176129
AT1G52230	1	19454835	19455668	AT1G52200	1	19442067	19443529	-0.459752	6.55e-05	0.977289	0.00287335
AT2G18196	2	7920507	7922326	AT2G18150	2	7892132	7893653	0.486898	0.0105358	-1.80586	9.79e-19
AT1G52855	1	19682945	19683498	AT1G52800	1	19664043	19665362	-1.27492	0.00580086	-2.49501	4.92e-06
AT1G32090	1	11540024	11544131	AT1G32070	1	11534681	11536338	0.326251	0.0218074	-0.267066	0.00704366
AT2G43560	2	18073858	18075498	AT2G43510	2	18067171	18067802	-0.363761	0.00764394	2.74899	4.83e-20
AT1G76110	1	28555041	28557586	AT1G76070	1	28546381	28547611	-0.717096	9.27e-05	0.698479	0.0160061
AT1G62300	1	23016682	23019279	AT1G62262	1	23000156	23002093	0.816126	2.38e-07	-1.20871	0.0443787
AT1G64380	1	23890645	23892173	AT1G64360	1	23887869	23888533	-1.68197	4.13e-08	-0.657229	8.41e-05
AT1G12550	1	4274593	4275981	AT1G12490	1	4260782	4261869	-0.716951	0.000730508	-2.42453	0.0477967
AT1G21590	1	7566231	7569902	AT1G21550	1	7553100	7553876	-0.7989	0.000545751	-0.99982	2.04e-05
AT2G43570	2	18076223	18077463	AT2G43510	2	18067171	18067802	1.53034	0.00983475	2.74899	4.83e-20
AT1G49210	1	18201888	18202764	AT1G49160	1	18179303	18182391	1.1899	0.00222341	-2.22115	5.05e-26
AT1G52230	1	19454835	19455668	AT1G52220	1	19453568	19454697	-0.459752	6.55e-05	-0.346489	2.67e-05
AT1G09310	1	3009054	3009880	AT1G09300	1	3003494	3008213	-0.387081	0.0195555	0.651931	0.00017267
AT1G61660	1	22753714	22756300	AT1G61640	1	22746371	22749184	-0.365632	0.0322857	0.513055	0.0278256
AT1G53330	1	19896026	19897442	AT1G53320	1	19891013	19893504	0.754466	0.0317959	0.337216	0.0110183
AT1G03660	1	911435	911759	AT1G03600	1	898875	899655	-1.22319	0.0305535	-0.354146	0.000866332
AT2G29970	2	12776385	12779938	AT2G29940	2	12760138	12766623	-0.395528	0.00621531	-0.586869	0.000447971
AT2G40520	2	16922586	16925914	AT2G40490	2	16912844	16915177	-1.29984	7.18e-09	-0.373083	0.00198289
AT2G03760	2	1149336	1150663	AT2G03730	2	1137610	1140186	-0.697794	0.0127343	-0.408917	0.0104163
AT1G66980	1	24997308	25001983	AT1G66940	1	24973027	24974791	-0.583436	0.0004021	0.462138	0.0038007
AT1G66970	1	24992552	24996117	AT1G66940	1	24973027	24974791	-0.641373	4.22e-07	0.462138	0.0038007
AT1G52710	1	19638284	19640239	AT1G52690	1	19619744	19621534	0.513975	0.00270527	-4.14302	2.54e-07
AT2G27402	2	11723524	11724362	AT2G27370	2	11708449	11710004	-2.56378	1.59e-41	-0.683818	0.0305613
AT2G21890	2	9331088	9332646	AT2G21860	2	9318257	9320002	-2.01044	0.00216169	-0.524555	8.14e-06
AT1G03860	1	979307	981885	AT1G03820	1	959868	960728	0.396382	0.0313466	-0.610324	5.48e-05
AT1G10690	1	3549991	3550632	AT1G10657	1	3530466	3531842	-0.92647	4.3e-06	-1.35171	2.4e-09
AT1G69920	1	26334249	26335558	AT1G69900	1	26326380	26327831	2.9035	1.63e-08	0.892441	0.0230635
AT2G27430	2	11729825	11733210	AT2G27385	2	11716000	11717432	0.636047	0.0214802	-0.599259	0.00225195
AT2G30140	2	12872133	12873820	AT2G30130	2	12868629	12869724	0.455845	0.0218058	1.08933	0.0181316
AT1G17070	1	5837589	5840332	AT1G17060	1	5832096	5835456	0.449526	0.00243196	0.801507	8.44e-05
AT1G67270	1	25183176	25185939	AT1G67265	1	25175557	25176202	3.58294	1.45e-08	2.15552	1.73e-34
AT1G64100	1	23791584	23795563	AT1G64065	1	23778352	23779529	-2.80449	1.1e-41	0.715507	0.007325
AT2G21880	2	9324632	9326321	AT2G21830	2	9303712	9305897	-0.748982	0.017608	-0.913319	7.34e-06
AT1G32540	1	11767503	11769898	AT1G32530	1	11759458	11762607	-0.871161	1.2e-07	0.32533	0.0123652
AT1G75080	1	28185503	28188075	AT1G75060	1	28181274	28183503	0.357541	0.00363458	-1.4261	1.02e-10
AT2G37210	2	15623990	15626940	AT2G37170	2	15613401	15614857	-0.891502	0.00214807	-0.37115	4.18e-05
AT1G11380	1	3832622	3834191	AT1G11362	1	3824509	3825196	0.629575	0.0326296	3.2062	5.69e-08
AT1G68520	1	25709113	25710907	AT1G68490	1	25693448	25695476	-0.552126	0.00126224	-0.357941	0.0324377
AT2G40370	2	16858165	16860606	AT2G40320	2	16840146	16842282	-0.818526	0.00242019	-0.410196	0.0380839
AT2G40520	2	16922586	16925914	AT2G40480	2	16910363	16912592	-1.29984	7.18e-09	-0.369621	0.0171342
AT2G32500	2	13794425	13797227	AT2G32480	2	13788516	13790073	-0.599485	2.66e-06	-0.572301	6.87e-10
AT2G18350	2	7971016	7972081	AT2G18330	2	7965634	7969105	0.703183	9.9e-07	0.34352	0.0453729
AT1G51920	1	19294228	19294579	AT1G51915	1	19293477	19293969	4.06387	3.27e-07	5.85047	9.02e-05
AT1G70150	1	26416897	26419588	AT1G70110	1	26406237	26408323	0.39392	0.0175597	-2.42891	0.0149705
AT2G36895	2	15489027	15490347	AT2G36870	2	15472644	15474681	-0.464333	2.08e-05	-0.755881	3.43e-07
AT1G19140	1	6610720	6612516	AT1G19130	1	6609324	6610613	-0.39784	0.00273832	0.433124	9.33e-05
AT1G62380	1	23082169	23084253	AT1G62370	1	23072574	23073189	0.35493	0.0264111	-0.59785	0.0141762
AT2G18280	2	7945997	7948468	AT2G18250	2	7939906	7941678	0.334581	0.00471264	0.326906	0.0293195
AT1G75490	1	28335501	28336706	AT1G75460	1	28327885	28329764	0.733543	0.00011099	-0.818908	1.89e-07
AT2G43560	2	18073858	18075498	AT2G43520	2	18068424	18069168	-0.363761	0.00764394	0.627942	0.0036673
AT1G51940	1	19295903	19299118	AT1G51913	1	19292908	19293339	0.49184	0.000157179	4.20493	2.53e-09
AT1G75500	1	28337725	28340275	AT1G75460	1	28327885	28329764	0.67037	1.12e-05	-0.818908	1.89e-07
AT1G13100	1	4463923	4465538	AT1G13040	1	4447646	4449200	-0.503891	0.0401562	0.393369	0.029208
AT1G02400	1	486800	489577	AT1G02370	1	474499	476511	0.900035	0.00239648	0.472706	0.00345575
AT2G44350	2	18316277	18320789	AT2G44290	2	18305200	18306251	0.266157	0.0383106	-1.10167	2.54e-06
AT1G78260	1	29446984	29450515	AT1G78230	1	29430224	29432764	0.620201	2.29e-05	-1.62083	3.69e-19
AT1G13040	1	4447646	4449200	AT1G13000	1	4436104	4439476	0.393369	0.029208	0.46524	3.21e-05
AT1G20350	1	7043712	7044592	AT1G20300	1	7029628	7031535	-1.13971	0.0375491	0.361303	0.0246818
AT1G78490	1	29528252	29530665	AT1G78440	1	29511598	29513051	0.375194	0.0222334	-6.92401	1.12e-08
AT1G78510	1	29535284	29537417	AT1G78440	1	29511598	29513051	-0.935671	1.03e-14	-6.92401	1.12e-08
AT1G65890	1	24512456	24514659	AT1G65870	1	24503623	24504193	-2.10819	0.00519371	-2.48558	1.76e-09
AT2G18600	2	8073199	8074982	AT2G18540	2	8042381	8045008	-0.988014	0.00111551	-2.37147	0.0348844
AT1G44446	1	16848358	16851224	AT1G44414	1	16847780	16848086	-0.890926	4.2e-13	1.51689	0.00263465
AT2G35830	2	15052198	15053275	AT2G35770	2	15034036	15036518	-0.576868	6.13e-10	-0.84167	0.0054264
AT1G61610	1	22733471	22736509	AT1G61560	1	22708603	22712210	-1.47425	0.011292	0.756516	0.000801528
AT1G11130	1	3722856	3727450	AT1G11100	1	3703671	3709302	-0.381553	0.0457911	0.726359	0.000314654
AT2G15790	2	6877773	6880898	AT2G15760	2	6865609	6866877	-0.352036	0.0208248	1.05389	0.0123895
AT1G23730	1	8395556	8398144	AT1G23720	1	8388654	8391540	-0.615574	0.0215187	0.992533	6.02e-05
AT1G32910	1	11925425	11926908	AT1G32870	1	11911678	11913947	2.84515	0.0310958	-0.423284	0.00291952
AT1G02820	1	623764	624475	AT1G02800	1	613215	616191	-2.57098	3.13e-18	-1.90608	8.41e-16
AT1G02820	1	623764	624475	AT1G02800	1	613215	616191	-2.57098	3.13e-18	-1.90608	8.41e-16
AT1G02850	1	630504	633259	AT1G02820	1	623764	624475	0.507243	9.18e-06	-2.57098	3.13e-18
AT1G02850	1	630504	633259	AT1G02820	1	623764	624475	0.507243	9.18e-06	-2.57098	3.13e-18
AT1G02850	1	630504	633259	AT1G02820	1	623764	624475	0.507243	9.18e-06	-2.57098	3.13e-18
AT1G02850	1	630504	633259	AT1G02820	1	623764	624475	0.507243	9.18e-06	-2.57098	3.13e-18
AT1G02850	1	630504	633259	AT1G02820	1	623764	624475	0.507243	9.18e-06	-2.57098	3.13e-18
AT1G02850	1	630504	633259	AT1G02820	1	623764	624475	0.507243	9.18e-06	-2.57098	3.13e-18
AT1G02870	1	637213	638677	AT1G02820	1	623764	624475	0.3884	0.0114332	-2.57098	3.13e-18
AT1G02870	1	637213	638677	AT1G02820	1	623764	624475	0.3884	0.0114332	-2.57098	3.13e-18
AT1G22330	1	7886541	7889534	AT1G22280	1	7873866	7875878	0.567428	0.000438852	0.429902	0.0120228
AT1G22370	1	7898012	7899879	AT1G22330	1	7886541	7889534	-0.420397	0.00742604	0.567428	0.000438852
AT1G22400	1	7903659	7906673	AT1G22330	1	7886541	7889534	1.80749	0.0420899	0.567428	0.000438852
AT1G22400	1	7903659	7906673	AT1G22330	1	7886541	7889534	1.80749	0.0420899	0.567428	0.000438852
AT1G29290	1	10244965	10245572	AT1G29280	1	10236366	10237467	1.70884	4.24e-06	0.340308	0.02712
AT1G29320	1	10255320	10258343	AT1G29280	1	10236366	10237467	0.319695	0.0309184	0.340308	0.02712
AT2G01570	2	255248	257550	AT2G01530	2	239704	240520	-0.278789	0.0220749	-0.469886	0.0254152
AT2G01580	2	265043	265905	AT2G01530	2	239704	240520	-1.10639	0.000310153	-0.469886	0.0254152
AT2G35840	2	15053622	15057426	AT2G35800	2	15044044	15048603	-0.663081	2.12e-09	-0.545973	0.000579248
AT2G35840	2	15053622	15057426	AT2G35800	2	15044044	15048603	-0.663081	2.12e-09	-0.545973	0.000579248
AT2G35840	2	15053622	15057426	AT2G35800	2	15044044	15048603	-0.663081	2.12e-09	-0.545973	0.000579248
AT2G35840	2	15053622	15057426	AT2G35800	2	15044044	15048603	-0.663081	2.12e-09	-0.545973	0.000579248
AT2G35880	2	15062987	15065870	AT2G35840	2	15053622	15057426	0.65599	1.75e-05	-0.663081	2.12e-09
AT2G35880	2	15062987	15065870	AT2G35840	2	15053622	15057426	0.65599	1.75e-05	-0.663081	2.12e-09
AT2G35880	2	15062987	15065870	AT2G35840	2	15053622	15057426	0.65599	1.75e-05	-0.663081	2.12e-09
AT2G35880	2	15062987	15065870	AT2G35840	2	15053622	15057426	0.65599	1.75e-05	-0.663081	2.12e-09
AT2G44900	2	18511718	18516408	AT2G44840	2	18495340	18496272	0.432906	0.000907152	-1.82545	0.00476817
AT1G74490	1	27994699	27996742	AT1G74430	1	27975178	27977434	-0.888234	0.0107655	-1.04945	0.00534822
AT1G66940	1	24973027	24974791	AT1G66840	1	24933855	24936322	0.462138	0.0038007	-1.06815	1.42e-10
AT1G22360	1	7894857	7897591	AT1G22330	1	7886541	7889534	1.05469	2.92e-06	0.567428	0.000438852
AT1G64710	1	24044544	24046552	AT1G64680	1	24036020	24037401	0.441636	0.0146546	-0.369056	0.000620749
AT2G35960	2	15106939	15107993	AT2G35920	2	15075596	15080812	-1.54134	1.98e-32	0.244831	0.0167778
AT2G18690	2	8097419	8098827	AT2G18630	2	8080502	8082698	2.13004	7.07e-15	-0.39025	0.00062784
AT1G69550	1	26148020	26153555	AT1G69523	1	26129550	26131292	-0.493016	0.000683515	-1.02678	2.14e-10
AT1G21100	1	7386838	7388428	AT1G21060	1	7371665	7374110	1.03541	1.06e-10	0.571746	4.34e-05
AT1G53160	1	19806418	19807608	AT1G53070	1	19778332	19779373	0.638955	0.00197188	-0.829395	0.00050045
AT2G30210	2	12887445	12889874	AT2G30140	2	12872133	12873820	-1.37546	1.7e-18	0.455845	0.0218058
AT2G31060	2	13213099	13218724	AT2G31010	2	13194184	13200128	0.386727	0.0285027	1.9824	6.64e-16
