# Supplementary material for: Polycomb-dependent differential chromatin compartmentalization determines gene coregulation in Arabidopsis
Source: HighWire-hosted journal article supplement (doi:10.1101/gr.273771.120), 2021-06-03
Supplement: Supplemental_Table_S18.xlsx [file Supplemental_Table_S18.xlsx]

## Sheet: Col0_Clf_loops
Supplementary Table S18: Col-0_vs_clf_Top2K loops
Peak_start(1)	Peak_end(1)	Gene1	Gene1_Chr1	Gene1_Start	Gene1_End	Hypo_1	Hyper_1	Marked_1	H3K27me_level_COl0_1	H3K27me_level_clf_1	Peak_start(2)	Peak_end(2)	Gene2	Hypo_2	Hyper_2	Marked_2	H3K27me_level_COl0_2	H3K27me_level_clf_2	Gene2_Chr	Gene2_Start	Gene2_End	Peak_strand(1)	Total Reads(1)	Peak_strand(2)	Total Reads(2)	InteractionID	Distance	Interaction Reads	Expected Reads	FDR(Benjamini, based on 2.84e+10 total tests)	Bg Interaction Reads	Bg Expected Reads	Bg Z-score	Bg LogP	Bg Total Reads Peak1	Bg Total Reads Peak2	LogP vs. Bg	Z-score Difference vs. Bg	Circos Thickness	RNA-seq_LFC_1	pval_1	RNA-seq_LFC_2	pval_2
7190775	7191275	AT2G16586	Chr2	7190936	7191938	NA	NA	Yes	0.195825	0.224022	2474	2974	AT2G01008	NA	NA	Yes	2.04049	2.45715	Chr2	1024	2810	+	443	+	1955	interaction62339	7188301	28	0.070444	0	1	0.070444	100	-0.457369	223	1541	-63.6301	2700	-26	-3.13837	NA	-2.01059	0.129281
6791014	6791514	AT5G20110	Chr5	6791486	6793346	NA	Yes	Yes	0.223197	0.236263	6790033	6790533	AT5G20100	NA	Yes	Yes	9.00244	15.8679	Chr5	6790055	6790725	+	619	+	1029	interaction168150	981	96	0.070444	0	29	0.070444	2900	-73.034	477	853	-54.5658	6700	-138	-0.136953	0.718836	2.08369	NA
18071944	18072444	AT2G43540	Chr2	18072370	18072963	NA	NA	NA	0.284363	0.326207	18071020	18071520	AT2G43535	NA	NA	NA	0.597701	0.488657	Chr2	18070972	18071676	+	861	+	1282	interaction85419	924	115	0.070444	0	43	0.070444	4300	-123.85	658	986	-47.1274	7200	-174	0.612198	0.00106388	0.909007	9.98e-11
21312418	21312918	AT1G57550	Chr1	21312540	21312809	Yes	NA	Yes	0.376485	0.505335	21311427	21311927	AT1G57540	NA	NA	Yes	0.301191	0.262226	Chr1	21310328	21311502	+	1457	+	191	interaction36008	991	85	0.070444	0	31	0.070444	3100	-82.8228	1442	127	-44.5754	5400	-124	NA	NA	0.147587	0.71414
7190699	7191199	AT2G16586	Chr2	7190936	7191938	NA	NA	Yes	0.195825	0.224022	3208	3708	AT2G01010	NA	NA	Yes	1.16194	1.31597	Chr2	3705	5513	+	495	+	975	interaction62332	7187491	22	0.070444	0	1	0.070444	100	-0.457294	211	901	-44.1284	2100	-18	-3.13837	NA	-0.592111	0.527337
14966489	14966989	AT2G35630	Chr2	14966677	14980606	NA	NA	NA	3.91622	2.5036	14965410	14965910	AT2G35620	NA	NA	Yes	0.145262	0.235681	Chr2	14960939	14965497	+	272	+	1775	interaction78684	1079	69	0.070444	0	20	0.070444	2000	-44.3405	170	1246	-44.0528	4900	-92	-0.29099	0.105953	-0.283392	0.191061
8025052	8025552	AT3G22700	Chr3	8024797	8025814	Yes	NA	Yes	0.154925	0.224458	8024021	8024521	AT3G22690	NA	NA	Yes	0.367445	0.464788	Chr3	8021228	8024534	+	1564	+	91	interaction102956	1031	28	0.070444	0	3	0.070444	300	-2.56214	1834	30	-43.2761	2500	-28	0.821518	NA	-0.468938	0.374701
6814931	6815431	AT3G19615	Chr3	6814965	6815403	NA	NA	Yes	0.145047	0.235042	6813660	6814160	AT3G19610	NA	NA	Yes	0.271159	0.416352	Chr3	6812492	6814719	+	125	+	457	interaction99843	1271	20	0.070444	0	1	0.070444	100	-0.456531	136	511	-38.396	1900	-16	0.464327	0.816406	NA	NA
607461	607961	AT3G02800	Chr3	606470	607886	NA	NA	Yes	0.178518	0.23858	605118	605618	AT3G02790	NA	NA	Yes	0.143719	0.330483	Chr3	604844	605421	+	774	+	1540	interaction90103	2343	116	0.070444	0	51	0.070444	5100	-156.206	453	1591	-35.998	6500	-176	0.163847	0.832856	0.0137544	0.975091
9411894	9412394	AT4G16745	Chr4	9411839	9414897	NA	NA	Yes	6.80105	4.34373	9408438	9408938	AT4G16740	NA	NA	Yes	6.81163	6.08725	Chr4	9407767	9410877	+	1350	+	292	interaction137469	3456	19	0.070444	0	1	0.070444	100	-0.456593	1129	140	-35.3486	1800	-16	0.883095	0.000261339	1.21356	NA
18267164	18267664	AT3G49270	Chr3	18267251	18268271	NA	NA	Yes	0.200447	0.227459	18265470	18265970	AT3G49260	NA	NA	Yes	1.24878	1.68679	Chr3	18262398	18266021	+	1110	+	460	interaction115097	1694	71	0.070444	0	24	0.070444	2400	-56.5876	1133	309	-35.1584	4700	-94	6.44002	0.00494222	-0.439155	0.00431004
22973012	22973512	AT5G56800	Chr5	22972988	22974308	NA	NA	Yes	0.212074	0.256756	22972078	22972578	AT5G56795	NA	NA	Yes	0.248233	0.170541	Chr5	22972041	22972449	+	1667	+	708	interaction192342	934	72	0.070444	0	24	0.070444	2400	-56.1986	1500	566	-34.7322	4800	-94	-1.55316	NA	0.425159	0.546416
1557474	1557974	AT5G05250	Chr5	1557036	1557998	NA	Yes	Yes	3.46087	3.75927	1556431	1556931	AT5G05240	NA	NA	NA	0.116826	0.207261	Chr5	1553813	1556556	+	1252	+	133	interaction158316	1043	25	0.070444	0	3	0.070444	300	-2.53798	898	73	-34.6549	2200	-24	-0.587958	0.0134934	-0.426006	0.202148
9451489	9451989	AT4G16790	Chr4	9451584	9453254	NA	NA	Yes	2.14427	0.721875	9436889	9437389	AT4G16770	NA	NA	Yes	1.25888	0.481874	Chr4	9434392	9437172	+	111	+	996	interaction137621	14600	28	0.070444	0	4	0.070444	400	-4.0037	83	778	-34.5558	2400	-28	-0.0656563	0.852642	0.297064	0.333887
25253031	25253531	AT1G67410	Chr1	25251192	25253667	NA	NA	NA	0.555024	0.465584	25250448	25250948	AT1G67400	NA	NA	NA	0.223197	0.236263	Chr1	25247987	25250734	+	316	+	1140	interaction47365	2583	66	0.070444	0	22	0.070444	2200	-50.484	207	1048	-34.4503	4400	-86	0.0796549	0.86375	-0.0712452	0.891152
11517984	11518484	AT2G26980	Chr2	11514702	11518734	NA	NA	NA	2.32735	2.34225	11513003	11513503	AT2G26975	NA	NA	Yes	0.411743	0.529071	Chr2	11512860	11513553	+	79	+	1684	interaction70061	4981	18	0.070444	0	1	0.070444	100	-0.452578	48	1557	-34.1281	1700	-14	1.0201	4.74e-07	0.254161	0.320995
15999988	16000488	AT2G38185	Chr2	15999925	16003169	NA	NA	NA	0.178564	0.344772	15997445	15997945	AT2G38180	NA	NA	Yes	0.653211	0.509396	Chr2	15997113	15998906	+	38	+	1734	interaction80815	2543	16	0.070444	0	1	0.070444	100	-0.438915	15	1548	-33.9411	1500	-12	-0.0709666	0.875669	0.0216536	0.964214
22156545	22157045	AT5G54540	Chr5	22156497	22158054	NA	NA	Yes	0.320631	0.410688	22149017	22149517	AT5G54520	NA	NA	Yes	0.205666	0.319722	Chr5	22146513	22149120	+	1559	+	271	interaction190658	7528	36	0.070444	0	7	0.070444	700	-9.48037	1225	180	-33.1438	2900	-38	0.11096	0.627306	-0.081227	0.876519
15870480	15870980	AT5G39635	Chr5	15870589	15871000	NA	NA	Yes	0.325069	0.47877	15869375	15869875	AT5G39630	Yes	NA	Yes	4.09337	1.04189	Chr5	15868261	15869714	+	59	+	1437	interaction178461	1105	16	0.070444	0	1	0.070444	100	-0.44226	18	1265	-32.6251	1500	-12	NA	NA	1.23494	NA
16235898	16236398	AT2G38870	Chr2	16236380	16237280	NA	Yes	Yes	5.02338	6.36385	16234994	16235494	AT2G38860	NA	NA	NA	0.176479	0.213178	Chr2	16233314	16235235	+	309	+	2000	interaction80934	904	40	0.070444	0	9	0.070444	900	-13.8398	203	1972	-32.0734	3100	-44	-0.0130018	0.968307	-0.0220007	0.952081
13678970	13679470	AT2G32220	Chr2	13678918	13679523	NA	NA	Yes	7.39494	12.0589	13674918	13675418	AT2G32190	NA	NA	Yes	4.37071	5.29098	Chr2	13674497	13675286	+	111	+	990	interaction75383	4052	21	0.070444	0	2	0.070444	200	-1.3309	110	1123	-31.8813	1900	-18	0.112346	0.8394	0.0766183	0.897741
23706440	23706940	AT5G58670	Chr5	23704230	23706800	NA	Yes	Yes	0.271322	0.295718	23703337	23703837	AT5G58660	NA	Yes	Yes	4.90054	9.16343	Chr5	23701466	23703988	+	137	+	1123	interaction193308	3103	47	0.070444	0	14	0.070444	1400	-27.0162	93	1456	-31.0751	3300	-56	0.293632	0.283519	0.252623	0.82641
2643026	2643526	AT3G08700	Chr3	2643481	2644545	NA	NA	Yes	4.51421	1.31075	2641567	2642067	AT3G08690	NA	NA	Yes	0.494967	0.320443	Chr3	2641055	2642688	+	137	+	1171	interaction93057	1459	40	0.070444	0	10	0.070444	1000	-16.3464	112	1160	-31.0024	3000	-46	0.639465	0.700177	0.119533	0.607018
21638887	21639387	AT3G58500	Chr3	21635225	21639105	NA	NA	NA	0.228361	0.361682	21633052	21633552	AT3G58490	NA	NA	NA	0.159967	0.207628	Chr3	21632811	21635106	+	150	+	1328	interaction121961	5835	29	0.070444	0	5	0.070444	500	-5.67452	100	1498	-30.5634	2400	-28	0.108775	0.621162	0.250667	0.234039
2900516	2901016	AT3G09410	Chr3	2897637	2901019	NA	NA	NA	0.143858	0.281017	2897005	2897505	AT3G09405	NA	NA	NA	0.548152	0.604811	Chr3	2894811	2897674	+	147	+	1757	interaction93766	3511	42	0.070444	0	11	0.070444	1100	-18.7656	134	1781	-30.3181	3100	-48	-0.0870146	0.764038	0.0178371	0.986452
663118	663618	AT1G02940	Chr1	663078	664128	Yes	NA	Yes	2.83482	1.20983	662386	662886	AT1G02930	NA	NA	Yes	0.145528	0.206997	Chr1	661176	662456	+	852	+	122	interaction1598	732	23	0.070444	0	3	0.070444	300	-2.53568	843	85	-29.4416	2000	-20	-0.0178536	0.993012	-0.634019	0.000102527
17988586	17989086	AT2G43270	Chr2	17988206	17989491	NA	NA	Yes	1.44794	0.718585	17985522	17986022	AT2G43261	NA	NA	Yes	1.85171	1.31447	Chr2	17985246	17986775	+	1249	+	72	interaction85210	3064	15	0.070444	0	1	0.070444	100	-0.440172	1627	16	-29.3068	1400	-10	4.88706	NA	NA	NA
16447447	16447947	AT5G41100	Chr5	16447221	16450881	NA	NA	Yes	0.143154	0.26154	16446527	16447027	AT5G41090	NA	NA	Yes	0.432839	0.635965	Chr5	16445763	16446537	+	53	+	581	interaction179873	920	15	0.070444	0	1	0.070444	100	-0.449784	33	479	-28.9722	1400	-12	0.529085	0.0303976	-0.348261	0.905002
4694932	4695432	AT1G13700	Chr1	4694371	4696023	NA	NA	Yes	0.216193	0.234686	4693516	4694016	AT1G13690	NA	NA	NA	0.274767	0.317457	Chr1	4693288	4694410	+	180	+	1383	interaction9367	1416	41	0.070444	0	11	0.070444	1100	-18.7768	130	1207	-28.8584	3000	-46	1.25456	2.78e-06	0.196673	0.380673
18704977	18705477	AT3G50400	Chr3	18704764	18706570	NA	NA	Yes	0.29876	0.208959	18703545	18704045	AT3G50390	NA	Yes	Yes	8.09706	14.2189	Chr3	18702073	18703619	+	1442	+	221	interaction116050	1432	57	0.070444	0	20	0.070444	2000	-44.4635	1498	153	-28.7054	3700	-72	-0.107102	0.795586	0.0943639	0.973695
16896409	16896909	AT4G35600	Chr4	16896201	16898876	NA	NA	Yes	1.11096	0.56138	16892408	16892908	AT4G35589	NA	NA	NA	0.0720593	0.137361	Chr4	16892765	16892903	+	1425	+	56	interaction152283	4001	16	0.070444	0	1	0.070444	100	-0.452312	1276	46	-28.0526	1500	-12	0.312796	0.116852	NA	NA
14664958	14665458	AT4G29980	Chr4	14664953	14665583	NA	NA	Yes	2.27019	0.980784	14663096	14663596	AT4G29970	NA	NA	Yes	5.96324	5.18966	Chr4	14662764	14663917	+	157	+	1953	interaction149189	1862	22	0.070444	0	3	0.070444	300	-2.5409	62	1714	-27.9382	1900	-20	1.26805	NA	NA	NA
7042459	7042959	AT2G16250	Chr2	7039681	7042933	NA	NA	NA	4.22593	1.19989	7039157	7039657	AT2G16240	NA	NA	NA	0.229023	0.134076	Chr2	7039093	7039165	+	156	+	1816	interaction62242	3302	69	0.070444	0	30	0.070444	3000	-78.8736	136	1371	-27.5826	3900	-96	0.345363	0.0716767	NA	NA
7133407	7133907	AT1G20600	Chr1	7133110	7134416	NA	NA	NA	0.178648	0.255296	7129042	7129542	AT1G20580	NA	NA	NA	0.164027	0.240019	Chr1	7128883	7130642	+	526	+	81	interaction13534	4365	16	0.070444	0	1	0.070444	100	-0.454036	465	63	-27.4817	1500	-12	0.117652	NA	0.0163018	0.962178
15706014	15706514	AT5G39220	Chr5	15705815	15708228	Yes	NA	Yes	5.97196	11.381	15703574	15704074	AT5G39210	NA	NA	Yes	1.43813	0.918076	Chr5	15703120	15704104	+	1649	+	42	interaction177922	2440	14	0.070444	0	1	0.070444	100	-0.443136	1873	19	-27.4193	1300	-10	2.22406	1.61e-06	0.304958	0.131803
16214481	16214981	AT4G33810	Chr4	16213323	16215594	NA	Yes	Yes	0.137315	0.222047	16203564	16204064	AT4G33780	NA	NA	Yes	0.580853	0.313486	Chr4	16201830	16203641	+	122	+	1297	interaction150733	10917	16	0.070444	0	1	0.070444	100	-0.454314	67	1322	-27.3934	1500	-12	-0.524527	0.472911	0.106648	0.704505
13341454	13341954	AT1G35890	Chr1	13341299	13341953	Yes	NA	Yes	4.54126	3.38132	13340464	13340964	AT1G35880	Yes	NA	Yes	2.20411	2.07019	Chr1	13339850	13341228	+	873	+	347	interaction25356	990	56	0.070444	0	19	0.070444	1900	-40.814	934	299	-27.3553	3700	-68	3.27617	NA	2.3611	NA
10456463	10456963	AT3G28100	Chr3	10456098	10460965	NA	NA	Yes	13.2837	9.6319	10455084	10455584	AT3G28080	NA	NA	Yes	0.976873	0.258316	Chr3	10451485	10455267	+	1457	+	256	interaction108273	1379	76	0.070444	0	33	0.070444	3300	-88.9593	1251	181	-27.272	4300	-104	0.041005	0.91537	-0.492225	0.0418979
7887867	7888367	AT1G22330	Chr1	7886541	7889534	NA	NA	Yes	0.767319	0.885836	7884016	7884516	AT1G22320	NA	NA	NA	0.14553	0.131058	Chr1	7884416	7884454	+	967	+	161	interaction15101	3851	25	0.070444	0	4	0.070444	400	-3.9908	1093	122	-27.0625	2100	-22	0.906006	1.2e-05	NA	NA
854495	854995	AT4G01970	Chr4	853921	857008	NA	NA	Yes	0.136727	0.276793	840919	841419	AT4G01935	NA	NA	NA	0.216473	0.272725	Chr4	841056	842364	+	94	+	1508	interaction126894	13576	15	0.070444	0	1	0.070444	100	-0.455537	93	1149	-27.0162	1400	-10	0.694362	0.476132	-0.400326	0.0988328
18504839	18505339	AT1G49975	Chr1	18504801	18505597	NA	NA	NA	0.355549	0.498168	18499568	18500068	AT1G49960	NA	Yes	Yes	1.10006	2.0135	Chr1	18498638	18501886	+	987	+	111	interaction28592	5271	15	0.070444	0	1	0.070444	100	-0.455571	1030	94	-27.0061	1400	-10	0.0613484	0.844596	-0.13456	0.726733
22073572	22074072	AT1G59970	Chr1	22073533	22074876	Yes	NA	Yes	6.42324	4.32392	22072489	22072989	AT1G59960	NA	NA	Yes	1.52298	0.815541	Chr1	22071291	22073147	+	1300	+	1134	interaction37899	1083	92	0.07624	0	36	0.070444	3600	-97.3085	1099	979	-26.9978	4900.53	-130	-0.0128527	0.9813	0.00253177	0.996658
1604935	1605435	AT4G03610	Chr4	1604938	1606982	Yes	NA	Yes	5.73943	4.67113	1603957	1604457	AT4G03600	Yes	NA	Yes	0.256533	0.22213	Chr4	1603701	1604508	+	1282	+	971	interaction128170	978	64	0.070444	0	23	0.070444	2300	-52.8255	1117	894	-26.954	4100	-80	0.623944	0.0186116	0.685962	0.303655
24673438	24673938	AT5G61370	Chr5	24671769	24673657	NA	NA	NA	0.302323	0.300797	24668515	24669015	AT5G61350	NA	NA	Yes	0.155779	0.307179	Chr5	24667972	24670501	+	114	+	1472	interaction195369	4923	24	0.070444	0	4	0.070444	400	-4.02699	53	1584	-26.8922	2000	-22	-0.176178	0.845963	-0.181178	0.700416
23705822	23706322	AT1G63860	Chr1	23701483	23706005	NA	NA	NA	0.446306	0.270848	23700965	23701465	AT1G63855	NA	NA	NA	0.132558	0.184702	Chr1	23699368	23700967	+	929	+	132	interaction41900	4857	16	0.070444	0	1	0.070444	100	-0.456342	926	125	-26.7773	1500	-12	1.95857	9.94e-22	0.0898816	0.880662
3881892	3882392	AT1G11560	Chr1	3881787	3882819	NA	NA	Yes	2.78847	2.63687	3881045	3881545	AT1G11550	NA	NA	Yes	0.375127	0.264936	Chr1	3881528	3881608	+	761	+	241	interaction7284	847	15	0.070444	0	1	0.070444	100	-0.456961	917	170	-26.5984	1400	-10	-0.392177	NA	NA	NA
19353944	19354444	AT3G52190	Chr3	19353971	19357074	NA	NA	NA	4.08478	2.95706	19352494	19352994	AT3G52180	NA	NA	NA	0.123681	0.207296	Chr3	19349651	19353596	+	686	+	184	interaction117503	1450	16	0.070444	0	1	0.070444	100	-0.457165	467	193	-26.5401	1500	-12	0.179453	0.503234	-0.11792	0.808385
26672527	26673027	AT5G66810	Chr5	26672925	26676613	Yes	NA	Yes	2.44391	1.43874	26663463	26663963	AT5G66780	NA	NA	Yes	0.735696	1.08787	Chr5	26663572	26664403	+	1671	+	232	interaction198054	9064	19	0.070444	0	2	0.070444	200	-1.3309	1362	177	-26.5201	1700	-16	-0.0760539	0.7994	2.3353	0.045123
19716057	19716557	AT5G48620	Chr5	19716475	19721452	NA	NA	NA	0.228165	0.280057	19711569	19712069	AT5G48610	NA	NA	NA	0.121342	0.205127	Chr5	19711541	19715910	+	742	+	97	interaction185874	4488	24	0.070444	0	4	0.070444	400	-4.01128	610	70	-26.4412	2000	-22	0.0840015	0.749997	0.0597844	0.869036
22685002	22685502	AT1G61490	Chr1	22685153	22688267	NA	NA	NA	3.10107	0.804458	22679015	22679515	AT1G61470	NA	NA	NA	0.443391	0.367216	Chr1	22678184	22679021	+	365	+	567	interaction39315	5987	16	0.070444	0	1	0.070444	100	-0.45788	366	484	-26.3399	1500	-12	-0.194923	0.748918	0.333174	0.739187
22496430	22496930	AT1G61080	Chr1	22493193	22497019	Yes	NA	Yes	2.31883	1.59458	22491499	22491999	AT1G61070	NA	NA	Yes	2.75321	2.21911	Chr1	22491732	22492542	+	884	+	696	interaction38896	4931	15	0.070444	0	1	0.070444	100	-0.458185	936	594	-26.2557	1400	-10	0.837512	0.0397181	-1.55316	NA
22340551	22341051	AT3G60450	Chr3	22340956	22342315	NA	NA	NA	1.87203	1.74579	22334453	22334953	AT3G60420	NA	Yes	Yes	1.6234	2.18374	Chr3	22334423	22337617	+	849	+	1057	interaction123545	6098	16	0.070444	0	1	0.070444	100	-0.458203	617	1008	-26.2507	1500	-12	0.150852	0.559063	-0.10135	NA
6355907	6356407	AT3G18510	Chr3	6355663	6356153	NA	NA	Yes	5.39019	2.10862	6355056	6355556	AT3G18500	NA	NA	NA	0.161473	0.233759	Chr3	6352476	6355442	+	1932	+	192	interaction98851	851	96	0.070444	0	51	0.070444	5100	-165.395	2008	121	-26.1973	4500	-146	0.182916	0.792574	-0.15981	0.59467
3120978	3121478	AT5G09978	Chr5	3120712	3121864	Yes	NA	Yes	2.19595	2.09524	3119500	3120000	AT5G09976	Yes	NA	Yes	3.46581	2.83633	Chr5	3119103	3119573	+	1337	+	1629	interaction161847	1478	84	0.112637	0	42	0.129471	2285.17	-119.261	1616	1677	-25.8284	2968.24	-116	0.698148	0.0119652	0.146643	0.9599
10308506	10309006	AT1G29465	Chr1	10308573	10309798	NA	NA	NA	0.0936673	0.161551	10303077	10303577	AT1G29430	NA	NA	NA	0.0898216	0.15942	Chr1	10302649	10303335	+	50	+	1645	interaction20257	5429	14	0.070444	0	1	0.070444	100	-0.451161	39	1793	-25.4339	1300	-10	0.257776	0.409886	0.0875495	0.834769
4854539	4855039	AT1G14200	Chr1	4854383	4855200	NA	NA	Yes	0.268625	0.399673	4847485	4847985	AT1G14180	NA	NA	NA	0.145515	0.201949	Chr1	4847161	4849207	+	222	+	1470	interaction9817	7054	29	0.070444	0	6	0.070444	600	-7.49553	156	1506	-25.1278	2300	-28	-0.425058	0.0429418	-0.0846634	0.864135
9394060	9394560	AT4G16695	Chr4	9394182	9395517	NA	Yes	NA	0.218495	0.281528	9385500	9386000	AT4G16670	NA	Yes	Yes	1.55293	2.74313	Chr4	9385218	9387754	+	1824	+	115	interaction137351	8560	18	0.070444	0	2	0.070444	200	-1.33091	1542	78	-25.0948	1600	-14	0.216125	0.383307	0.0802422	0.854763
2888514	2889014	AT1G08990	Chr1	2888752	2890959	NA	Yes	Yes	9.50252	19.7868	2887556	2888056	AT1G08985	NA	Yes	Yes	1.30462	1.11351	Chr1	2887284	2887706	+	1794	+	191	interaction5302	958	52	0.070444	0	19	0.070444	1900	-42.0944	1766	92	-25.0563	3300	-64	0.274645	0.259943	NA	NA
2940035	2940535	AT5G09443	Chr5	2940524	2941094	NA	NA	NA	0.280565	0.344684	2939013	2939513	AT5G09440	NA	Yes	Yes	1.72718	2.6365	Chr5	2938346	2939461	+	62	+	819	interaction161426	1022	25	0.070444	0	5	0.070444	500	-5.72915	55	688	-24.9226	2000	-24	0.465679	0.306498	0.729285	8.28e-07
19379589	19380089	AT2G47210	Chr2	19378868	19382418	NA	Yes	Yes	2.33735	1.93716	19377564	19378064	AT2G47200	NA	Yes	Yes	3.58675	6.69146	Chr2	19377728	19378331	+	82	+	1786	interaction87783	2025	14	0.070444	1e-06	1	0.070444	100	-0.453358	55	1472	-24.8057	1300	-10	-0.0990262	0.699469	0.260225	0.573127
205004	205504	AT1G01570	Chr1	205175	207435	NA	NA	NA	0.0959517	0.173969	202430	202930	AT1G01560	NA	NA	Yes	0.122985	0.212003	Chr1	202135	204335	+	120	+	422	interaction422	2574	21	0.070444	0	3	0.070444	300	-2.53371	99	321	-24.7295	1800	-18	-0.33558	0.524858	0.316053	0.858202
6975505	6976005	AT1G20120	Chr1	6975387	6977264	Yes	NA	Yes	1.97637	1.06164	6973980	6974480	AT1G20110	NA	NA	NA	0.213695	0.295356	Chr1	6971484	6974835	+	1077	+	264	interaction13004	1525	55	0.070444	0	20	0.070444	2000	-43.9734	1214	257	-24.6286	3500	-68	0.812054	0.0589338	0.0427111	0.899001
6998959	6999459	AT1G20190	Chr1	6998488	6999817	NA	NA	Yes	0.33719	0.534353	6996024	6996524	AT1G20180	NA	NA	Yes	3.49195	3.72211	Chr1	6996209	6997943	+	1978	+	40	interaction13231	2935	13	0.070444	4e-06	1	0.070444	100	-0.441278	2098	17	-24.6003	1200	-8	-0.495324	0.00487612	-0.392362	0.88957
22109560	22110060	AT3G59850	Chr3	22109163	22111609	NA	NA	Yes	1.5526	1.18725	22106993	22107493	AT3G59845	NA	NA	Yes	2.31659	3.94552	Chr3	22106242	22107924	+	87	+	812	interaction123168	2567	14	0.070444	1e-06	1	0.070444	100	-0.45418	65	1077	-24.5842	1300	-10	-0.145503	0.892761	NA	NA
7904473	7904973	AT1G22400	Chr1	7903659	7906673	NA	NA	Yes	1.88425	2.0668	7901947	7902447	AT1G22380	NA	NA	Yes	4.61761	5.75624	Chr1	7900386	7902332	+	84	+	1977	interaction15204	2526	17	0.070444	0	2	0.070444	200	-1.33099	35	1851	-24.5058	1500	-14	1.01364	5.79e-07	0.782301	0.178153
1449990	1450490	AT1G05055	Chr1	1448717	1450887	NA	NA	NA	0.134009	0.25212	1440963	1441463	AT1G05030	NA	NA	NA	0.122352	0.174671	Chr1	1438151	1441417	+	99	+	1560	interaction3001	9027	32	0.070444	0	8	0.070444	800	-11.6981	105	1308	-24.2178	2400	-34	-0.0418572	0.922429	-0.257104	0.264117
9432107	9432607	AT4G16765	Chr4	9429874	9432437	NA	NA	NA	0.202571	0.138972	9411905	9412405	AT4G16745	NA	NA	Yes	4.96455	3.84312	Chr4	9411839	9414897	+	116	+	1350	interaction137565	20202	14	0.070444	1e-06	1	0.070444	100	-0.455603	95	1129	-24.2155	1300	-10	-0.0247293	0.955614	0.883095	0.000261339
26277044	26277544	AT1G69810	Chr1	26277237	26279118	Yes	NA	Yes	4.81816	4.16858	26276017	26276517	AT1G69800	NA	NA	Yes	0.434479	0.355022	Chr1	26274229	26276329	+	138	+	937	interaction49877	1027	21	0.070444	0	3	0.070444	300	-2.52968	150	732	-24.1812	1800	-18	0.268745	0.287977	0.0196248	0.962074
16175944	16176444	AT5G40430	Chr5	16176426	16177731	Yes	NA	Yes	0.422679	0.571427	16174034	16174534	AT5G40420	Yes	NA	Yes	1.33241	0.86126	Chr5	16173392	16174783	+	187	+	628	interaction179625	1910	14	0.070444	1e-06	1	0.070444	100	-0.456203	118	468	-24.0656	1300	-10	-2.5676	NA	2.31621	1.2e-11
16099892	16100392	AT4G33460	Chr4	16098069	16100266	NA	NA	NA	0.196209	0.264241	16095996	16096496	AT4G33450	NA	Yes	Yes	9.06694	15.9567	Chr4	16095391	16096610	+	350	+	612	interaction150592	3896	14	0.070444	2e-06	1	0.070444	100	-0.456466	132	584	-24.0009	1300	-10	-0.152669	0.702698	0.236828	0.847245
9426525	9427025	AT2G22170	Chr2	9426848	9427817	NA	Yes	Yes	0.59376	0.669643	9420443	9420943	AT2G22145	Yes	NA	Yes	3.8482	1.23872	Chr2	9420319	9420589	+	167	+	553	interaction66720	6082	14	0.070444	1e-06	1	0.070444	100	-0.456531	136	501	-23.9849	1300	-10	0.0904894	0.701312	NA	NA
3481364	3481864	AT3G11120	Chr3	3481051	3481448	NA	Yes	NA	0.148547	0.212251	3476994	3477494	AT3G11100	NA	NA	NA	0.181316	0.338466	Chr3	3476186	3477405	+	1703	+	304	interaction95034	4370	49	0.070444	0	17	0.070444	1700	-35.0633	1413	202	-23.9634	3200	-58	0.0740109	0.782793	0.296835	0.0972636
28183430	28183930	AT1G75060	Chr1	28181274	28183503	NA	NA	Yes	0.548281	0.321585	28180533	28181033	AT1G75050	NA	NA	Yes	0.230707	0.292894	Chr1	28180115	28181062	+	431	+	172	interaction53905	2897	14	0.070444	1e-06	1	0.070444	100	-0.456757	321	152	-23.9298	1300	-10	-0.175771	0.784125	-0.675378	NA
30048040	30048540	AT1G79880	Chr1	30046027	30048378	NA	NA	NA	10.467	9.61742	30044573	30045073	AT1G79870	NA	Yes	Yes	0.327549	0.541927	Chr1	30044745	30046027	+	103	+	1391	interaction57966	3467	29	0.070444	0	7	0.070444	700	-9.61882	71	1390	-23.879	2200	-30	0.195426	0.438044	-0.154053	0.388818
14565934	14566434	AT5G36925	Chr5	14565812	14566244	Yes	NA	Yes	10.6693	17.4902	14564456	14564956	AT5G36920	NA	NA	Yes	1.14288	0.483873	Chr5	14564391	14564971	+	1312	+	114	interaction175148	1478	31	0.070444	0	8	0.070444	800	-11.8283	1123	66	-23.7914	2300	-32	1.49533	0.000102928	0.197149	0.839571
9406592	9407092	AT3G25770	Chr3	9406872	9407955	Yes	NA	Yes	2.79696	0.900326	9404480	9404980	AT3G25760	Yes	NA	Yes	3.16682	1.55882	Chr3	9403882	9405250	+	1922	+	556	interaction106086	2112	66	0.070444	0	27	0.070444	2700	-66.437	1580	365	-23.7907	3900	-84	1.36574	2.54e-37	1.53125	6.62e-29
10547414	10547914	AT1G30070	Chr1	10546590	10548151	NA	NA	Yes	0.254453	0.333208	10542628	10543128	AT1G30050	NA	Yes	Yes	0.856693	1.44615	Chr1	10543021	10544591	+	737	+	993	interaction20653	4786	18	0.070444	0	2	0.070444	200	-1.33089	637	1063	-23.7726	1600	-14	-0.0589476	0.893036	-0.13662	0.95515
18158472	18158972	AT3G48990	Chr3	18158746	18161379	NA	NA	NA	0.170317	0.223382	18155940	18156440	AT3G48980	NA	NA	Yes	0.258155	0.447236	Chr3	18155415	18158417	+	142	+	1615	interaction114956	2532	42	0.070444	0	14	0.070444	1400	-26.968	98	1235	-23.6753	2800	-48	0.437952	0.0422584	-0.140963	0.70214
2351087	2351587	AT4G04640	Chr4	2350497	2352018	NA	NA	Yes	3.75466	4.40814	2329545	2330045	AT4G04620	NA	NA	Yes	0.148289	0.220044	Chr4	2328448	2330200	+	1234	+	1009	interaction128582	21542	14	0.070444	2e-06	1	0.070444	100	-0.458357	1277	914	-23.5515	1300	-10	-0.142803	0.483251	0.206379	0.364109
3357377	3357877	AT3G10720	Chr3	3354446	3357614	NA	Yes	Yes	0.123486	0.217716	3350482	3350982	AT3G10700	NA	NA	NA	0.121767	0.196952	Chr3	3346577	3351023	+	1150	+	1023	interaction94565	6895	14	0.070444	2e-06	1	0.070444	100	-0.458358	987	918	-23.5512	1300	-10	0.369247	0.668012	-0.0379045	0.92711
1228987	1229487	AT4G02770	Chr4	1229110	1229945	NA	NA	Yes	3.59673	6.56567	1228163	1228663	AT4G02760	NA	NA	NA	0.140543	0.211819	Chr4	1223958	1228941	+	360	+	2016	interaction127475	824	115	0.070444	0	64	0.070444	6400	-216.891	205	1775	-23.5333	5100	-178	-0.144575	0.560644	-0.0429546	0.938592
14751586	14752086	AT2G35000	Chr2	14751573	14753319	NA	Yes	Yes	3.76987	5.87904	14750398	14750898	AT2G34990	NA	Yes	Yes	3.06405	4.98355	Chr2	14750259	14751168	+	87	+	1872	interaction78249	1188	22	0.070444	0	4	0.070444	400	-4.03536	47	1568	-23.5208	1800	-20	0.243343	0.456209	-0.0749929	NA
29741505	29742005	AT1G79060	Chr1	29741747	29743600	NA	NA	NA	0.203053	0.240938	29740080	29740580	AT1G79050	NA	NA	NA	0.127285	0.219143	Chr1	29736958	29740179	+	1302	+	222	interaction57541	1425	28	0.070444	0	6	0.070444	600	-7.48744	1037	177	-23.237	2200	-26	-0.149371	0.643556	0.0821201	0.754955
2596	3096	AT2G01008	Chr2	1024	2810	NA	NA	Yes	4.51181	1.37073	3252963	3253463	AT5G10340	NA	NA	Yes	2.66487	2.77224	Chr5	3253121	3255045	+	1955	+	1819	interaction58418	interchromosomal	184	0.18391	0	30	0.070444	3000	-76.2991	1541	614	-23.2031	4047.79	-310	-2.01059	0.129281	-0.58545	NA
3252963	3253463	AT5G10340	Chr5	3253121	3255045	NA	NA	Yes	0.182877	0.240679	2596	3096	AT2G01008	NA	NA	Yes	2.04049	2.45715	Chr2	1024	2810	+	1819	+	1955	interaction162229	interchromosomal	184	0.18391	0	30	0.070444	3000	-76.2991	614	1541	-23.2031	4047.79	-310	-0.58545	NA	-2.01059	0.129281
27497518	27498018	AT1G73120	Chr1	27497185	27497950	NA	Yes	NA	0.191764	0.256591	27492494	27492994	AT1G73100	NA	NA	NA	0.120218	0.255358	Chr1	27491183	27494182	+	1806	+	205	interaction52377	5024	34	0.070444	0	9	0.070444	900	-13.8611	1627	177	-22.9909	2500	-36	0.420939	0.0499248	-0.0196663	0.961467
18326463	18326963	AT5G45260	Chr5	18326202	18332609	NA	NA	NA	3.64868	1.77359	18325485	18325985	AT5G45250	NA	NA	NA	0.233344	0.291337	Chr5	18321913	18326022	+	1165	+	109	interaction183350	978	34	0.070444	0	10	0.070444	1000	-16.5363	1290	73	-22.9106	2400	-36	-0.236082	0.322905	-0.00153886	0.997087
7924948	7925448	AT1G22450	Chr1	7925120	7927278	NA	NA	NA	0.174764	0.264945	7922480	7922980	AT1G22440	NA	NA	Yes	2.47876	2.66231	Chr1	7922427	7924944	+	203	+	1099	interaction15399	2468	39	0.070444	0	12	0.070444	1200	-21.2783	154	1093	-22.6549	2700	-42	0.0175447	0.95765	0.2852	0.100608
4758065	4758565	AT5G14740	Chr5	4757971	4762615	NA	NA	Yes	3.56989	2.74175	4756520	4757020	AT5G14730	NA	Yes	Yes	3.64598	6.22615	Chr5	4756217	4757657	+	116	+	1682	interaction164777	1545	39	0.070444	0	13	0.070444	1300	-24.5315	68	1232	-22.6116	2600	-44	0.0591532	0.837134	0.132164	0.768229
10321009	10321509	AT4G18800	Chr4	10319861	10321551	Yes	NA	Yes	2.4388	1.34642	10318958	10319458	AT4G18790	Yes	NA	Yes	2.73085	1.81758	Chr4	10317784	10319660	+	264	+	1741	interaction139260	2051	85	0.070444	0	43	0.070444	4300	-127.651	183	1777	-22.5885	4200	-122	0.0980192	0.835266	1.19445	NA
8733985	8734485	AT3G24170	Chr3	8729509	8734562	NA	NA	NA	0.151037	0.265486	8725959	8726459	AT3G24160	NA	NA	Yes	0.218495	0.281528	Chr3	8726121	8729389	+	136	+	1038	interaction104403	8026	20	0.070444	0	3	0.070444	300	-2.53243	111	783	-22.4855	1700	-16	-0.100688	0.616218	-0.0617385	0.786024
2092063	2092563	AT1G06810	Chr1	2091737	2092528	NA	Yes	Yes	5.13523	11.0579	2090557	2091057	AT1G06800	NA	Yes	Yes	1.40714	3.20096	Chr1	2089416	2091686	+	444	+	93	interaction4419	1506	22	0.070444	0	4	0.070444	400	-4.01271	435	68	-22.4314	1800	-20	0.385297	NA	0.0646777	0.852595
17295954	17296454	AT2G41475	Chr2	17295073	17296420	Yes	NA	Yes	0.147546	0.236563	17294441	17294941	AT2G41473	Yes	NA	Yes	3.50395	1.83282	Chr2	17294452	17294728	+	937	+	1240	interaction83442	1513	76	0.070444	0	34	0.070444	3400	-90.4325	612	1141	-22.3077	4200	-102	0.471085	0.000605131	-2.52372	NA
12665632	12666132	AT2G29620	Chr2	12662740	12665803	NA	Yes	Yes	1.78496	0.544596	12655504	12656004	AT2G29600	NA	Yes	Yes	5.80175	10.4201	Chr2	12655150	12657296	+	1271	+	143	interaction72755	10128	20	0.070444	0	3	0.070444	300	-2.53006	985	143	-22.205	1700	-16	0.0314937	0.96751	0.271532	NA
22983897	22984397	AT3G62070	Chr3	22983137	22984513	NA	Yes	Yes	0.0931585	0.0969138	22982575	22983075	AT3G62060	NA	NA	NA	0.134518	0.25111	Chr3	22979954	22982944	+	1134	+	96	interaction124614	1322	38	0.070444	0	13	0.070444	1300	-24.4399	1082	74	-22.0961	2500	-44	0.159826	0.70267	-0.174667	0.713048
17966526	17967026	AT2G43230	Chr2	17966250	17968726	NA	Yes	Yes	0.43855	0.336058	17963518	17964018	AT2G43210	NA	Yes	Yes	0.447496	0.647714	Chr2	17960699	17963727	+	187	+	492	interaction85143	3008	17	0.070444	0	2	0.070444	200	-1.3309	156	553	-22.0718	1500	-12	-0.497754	0.367631	0.0111928	0.976825
22784028	22784528	AT3G61571	Chr3	22784020	22784182	NA	NA	NA	0.223313	0.253745	22777584	22778084	AT3G61560	NA	Yes	Yes	0.28924	0.557737	Chr3	22777828	22780191	+	62	+	1278	interaction124307	6444	16	0.070444	0	2	0.070444	200	-1.33098	38	1004	-21.8654	1400	-12	-1.80201	NA	-0.0310134	0.941366
22932976	22933476	AT3G61920	Chr3	22932495	22933362	NA	Yes	Yes	0.124115	0.20337	22929422	22929922	AT3G61910	NA	NA	Yes	2.46058	3.36395	Chr3	22929005	22930442	+	38	+	1550	interaction124460	3554	12	0.070444	6.5e-05	1	0.070444	100	-0.431543	11	1426	-21.8607	1100	-8	-0.082086	0.964778	0.288614	NA
11716937	11717437	AT2G27385	Chr2	11716000	11717432	NA	NA	Yes	0.116617	0.233034	11709046	11709546	AT2G27370	Yes	NA	Yes	5.25591	2.2974	Chr2	11708449	11710004	+	1982	+	233	interaction70438	7891	20	0.070444	0	3	0.070444	300	-2.52683	2100	237	-21.8352	1700	-16	0.453139	0.0706139	0.0689574	0.879712
983586	984086	AT4G02250	Chr4	983969	984523	NA	Yes	Yes	8.32332	3.18641	981464	981964	AT4G02235	NA	Yes	Yes	3.88949	7.50344	Chr4	980954	981711	+	65	+	286	interaction127063	2122	13	0.070444	1e-05	1	0.070444	100	-0.454379	68	402	-21.7813	1200	-8	NA	NA	NA	NA
21036976	21037476	AT3G56810	Chr3	21036759	21038947	NA	Yes	Yes	0.785076	1.35997	21036074	21036574	AT3G56800	NA	Yes	Yes	0.313938	0.295301	Chr3	21034536	21036077	+	257	+	652	interaction120619	902	37	0.070444	0	11	0.070444	1100	-18.6478	200	561	-21.7333	2600	-40	-0.440444	0.0859887	0.0456643	0.851228
20239445	20239945	AT5G49810	Chr5	20239342	20246380	NA	NA	Yes	0.278633	0.406919	20236029	20236529	AT5G49800	Yes	NA	Yes	4.84524	4.26808	Chr5	20234641	20236184	+	1277	+	73	interaction186600	3416	21	0.070444	0	4	0.070444	400	-4.03697	927	46	-21.7329	1700	-18	-0.289196	0.0372012	-0.0266499	0.97005
9404524	9405024	AT3G25760	Chr3	9403882	9405250	Yes	NA	Yes	0.150455	0.165054	9401633	9402133	AT3G25750	Yes	NA	Yes	9.07157	7.16292	Chr3	9400954	9402088	+	556	+	808	interaction106045	2891	17	0.070444	0	2	0.070444	200	-1.33089	365	718	-21.7135	1500	-12	1.53125	6.62e-29	NA	NA
7618001	7618501	AT3G21630	Chr3	7615384	7618581	NA	NA	NA	1.20187	0.646769	7610448	7610948	AT3G21610	NA	Yes	Yes	0.305559	0.407241	Chr3	7609142	7610717	+	1536	+	341	interaction101446	7553	25	0.070444	0	5	0.070444	500	-5.63708	1430	237	-21.7043	2000	-22	0.0345709	0.918355	0.128914	0.612549
1929015	1929515	AT5G06310	Chr5	1928390	1930951	Yes	NA	Yes	1.07927	0.564427	1918977	1919477	AT5G06290	NA	NA	NA	0.173462	0.279574	Chr5	1919212	1921425	+	1268	+	91	interaction159256	10038	13	0.070444	1.3e-05	1	0.070444	100	-0.455115	1422	82	-21.6231	1200	-8	-0.0107688	0.991102	-0.246226	0.0586641
28305030	28305530	AT1G75420	Chr1	28305296	28307503	NA	NA	NA	0.264251	0.328659	28301549	28302049	AT1G75410	NA	NA	Yes	0.134509	0.233005	Chr1	28299791	28302603	+	94	+	889	interaction54412	3481	19	0.070444	0	3	0.070444	300	-2.5426	57	950	-21.62	1600	-16	-0.080826	0.811576	0.140258	0.564052
8619925	8620425	AT3G23870	Chr3	8619191	8621907	Yes	NA	Yes	0.216142	0.23242	8615501	8616001	AT3G23850	NA	NA	Yes	1.96769	1.13792	Chr3	8615563	8616533	+	1425	+	92	interaction104183	4424	22	0.070444	0	4	0.070444	400	-3.99682	1433	100	-21.5928	1800	-20	-0.0898063	0.912551	NA	NA
21759206	21759706	AT5G53560	Chr5	21759366	21760578	NA	NA	NA	0.191464	0.281924	21748427	21748927	AT5G53530	NA	NA	NA	0.127103	0.24986	Chr5	21746034	21748595	+	782	+	149	interaction189187	10779	13	0.070444	1.7e-05	1	0.070444	100	-0.455603	600	95	-21.5202	1200	-8	0.143341	0.401854	0.160254	0.578028
11240375	11240875	AT4G21060	Chr4	11240729	11245049	NA	NA	Yes	14.3889	23.2413	11223475	11223975	AT4G21000	Yes	NA	Yes	4.69341	1.1421	Chr4	11222528	11223756	+	99	+	1863	interaction141260	16900	13	0.070444	1.4e-05	1	0.070444	100	-0.455635	96	1873	-21.5135	1200	-8	-0.0608388	0.898375	1.21356	NA
20159512	20160012	AT1G54010	Chr1	20158663	20160815	Yes	NA	Yes	0.129987	0.241357	20155592	20156092	AT1G54000	Yes	NA	Yes	7.37292	3.37555	Chr1	20154168	20156419	+	382	+	993	interaction33144	3920	25	0.070444	0	5	0.070444	500	-5.6285	348	906	-21.4515	2000	-22	0.449591	0.000265788	0.369286	0.157661
438929	439429	AT5G02210	Chr5	439252	439874	NA	NA	Yes	0.124846	0.174457	438037	438537	AT5G02200	NA	NA	Yes	0.15986	0.233528	Chr5	437459	438894	+	214	+	1794	interaction156379	892	81	0.070444	0	42	0.070444	4200	-124.373	161	1864	-21.3423	3900	-116	0.734706	NA	0.336699	0.677724
18874534	18875034	AT2G45860	Chr2	18874759	18875586	NA	NA	NA	1.17001	1.15614	18869038	18869538	AT2G45840	Yes	NA	Yes	2.67984	1.50172	Chr2	18869260	18871561	+	218	+	577	interaction86919	5496	13	0.070444	2e-05	1	0.070444	100	-0.457	174	511	-21.2346	1200	-8	0.0838771	0.855134	0.920804	NA
17157908	17158408	AT2G41160	Chr2	17156028	17158880	NA	NA	NA	4.05638	5.13187	17143956	17144456	AT2G41130	NA	Yes	Yes	10.1789	18.5309	Chr2	17143293	17144949	+	1688	+	162	interaction83020	13952	13	0.070444	1.8e-05	1	0.070444	100	-0.45701	1721	175	-21.2327	1200	-8	-0.0165825	0.963071	-0.406621	0.138467
5819494	5819994	AT5G17660	Chr5	5818547	5820864	Yes	NA	Yes	4.15562	0.805002	5817914	5818414	AT5G17650	Yes	NA	Yes	4.03583	1.7323	Chr5	5816697	5818347	+	242	+	392	interaction166015	1580	13	0.070444	2e-05	1	0.070444	100	-0.457056	180	362	-21.2234	1200	-8	-0.0867734	0.807398	0.438702	0.0175168
25491466	25491966	AT5G63680	Chr5	25490072	25492752	NA	NA	NA	8.21982	1.35772	25487985	25488485	AT5G63670	NA	NA	NA	0.153488	0.198478	Chr5	25487926	25489428	+	265	+	829	interaction196407	3481	13	0.070444	2.1e-05	1	0.070444	100	-0.457149	191	702	-21.2048	1200	-8	-0.163264	0.413719	0.331658	0.0435354
2954401	2954901	AT5G09500	Chr5	2953912	2954918	NA	NA	Yes	0.280565	0.344684	2952991	2953491	AT5G09490	NA	Yes	Yes	9.3703	7.8433	Chr5	2952215	2953245	+	1004	+	256	interaction161448	1410	29	0.070444	0	7	0.070444	700	-9.46677	692	213	-21.2011	2200	-28	0.578109	0.792127	-2.5676	NA
2864463	2864963	AT3G09330	Chr3	2864781	2867230	NA	Yes	Yes	0.159967	0.207628	2863029	2863529	AT3G09320	NA	NA	Yes	0.157421	0.261173	Chr3	2861742	2864245	+	213	+	1410	interaction93606	1434	13	0.070444	2e-05	1	0.070444	100	-0.457261	206	1870	-21.1827	1200	-8	-0.543714	0.665935	0.0442364	0.912476
1079982	1080482	AT2G03560	Chr2	1079638	1081376	NA	NA	Yes	0.0936789	0.129615	1077550	1078050	AT2G03550	NA	NA	Yes	3.09677	2.55478	Chr2	1077035	1078083	+	758	+	555	interaction59756	2432	39	0.070444	0	12	0.070444	1200	-21.068	785	350	-21.1811	2700	-42	1.71817	NA	0.289145	0.0480903
521468	521968	AT1G02510	Chr1	520497	521668	NA	NA	Yes	0.235123	0.433346	518473	518973	AT1G02500	NA	NA	Yes	0.125829	0.222242	Chr1	518250	520437	+	1248	+	1649	interaction1039	2995	88	0.106429	0	37	0.095718	2723.02	-100.836	1199	1671	-21.1807	3101.53	-122	NA	NA	-0.100737	0.69513
17632464	17632964	AT4G37520	Chr4	17631561	17633249	NA	NA	Yes	7.11636	7.83197	17628938	17629438	AT4G37510	NA	NA	Yes	0.227381	0.314076	Chr4	17626103	17628947	+	1659	+	211	interaction153601	3526	52	0.070444	0	21	0.070444	2100	-48.0293	1287	120	-21.1164	3100	-64	0.698209	9.4e-05	-0.0879675	0.785534
15381480	15381980	AT5G38420	Chr5	15380944	15382035	Yes	NA	Yes	0.56028	1.10633	15377007	15377507	AT5G38410	NA	Yes	Yes	0.51513	0.417791	Chr5	15377172	15378416	+	618	+	460	interaction176704	4473	13	0.070444	2.3e-05	1	0.070444	100	-0.45779	329	418	-21.0784	1200	-8	-0.0632098	0.825852	-0.124555	0.534157
120577	121077	AT3G01323	Chr3	121056	121423	Yes	NA	Yes	0.40593	0.385003	118925	119425	AT3G01329	Yes	NA	Yes	3.14767	0.836308	Chr3	118872	119178	+	354	+	514	interaction88702	1652	13	0.070444	2.2e-05	1	0.070444	100	-0.457945	399	456	-21.0481	1200	-8	NA	NA	0.925172	0.70267
23185904	23186404	AT1G62630	Chr1	23185911	23188593	NA	NA	Yes	0.18512	0.290089	23184985	23185485	AT1G62620	NA	NA	NA	0.173699	0.182571	Chr1	23182643	23184991	+	746	+	355	interaction40686	919	13	0.070444	2.2e-05	1	0.070444	100	-0.458072	883	483	-21.0235	1200	-8	-0.391761	0.0835933	-0.124287	0.941035
843053	843553	AT4G01940	Chr4	841988	843459	NA	NA	NA	0.132113	0.210249	840874	841374	AT4G01935	NA	NA	NA	0.216473	0.272725	Chr4	841056	842364	+	244	+	1508	interaction126872	2179	54	0.070444	0	22	0.070444	2200	-50.5828	190	1149	-20.999	3200	-66	0.075117	0.828539	-0.400326	0.0988328
7567588	7568088	AT2G17430	Chr2	7568017	7570840	NA	NA	NA	1.57869	0.873179	7564494	7564994	AT2G17420	NA	NA	NA	0.158947	0.275408	Chr2	7564344	7566539	+	161	+	1801	interaction63182	3094	19	0.070444	0	3	0.070444	300	-2.53396	97	1534	-20.6431	1600	-16	0.358388	0.286142	0.106258	0.577119
1611499	1611999	AT4G03635	Chr4	1611751	1612756	NA	NA	NA	0.194418	0.282304	1604996	1605496	AT4G03610	Yes	NA	Yes	3.48774	1.54154	Chr4	1604938	1606982	+	275	+	1282	interaction128260	6503	24	0.070444	0	5	0.070444	500	-5.65461	144	1117	-20.5242	1900	-22	0.0988715	0.864233	0.623944	0.0186116
9329584	9330084	AT4G16563	Chr4	9329656	9331523	NA	Yes	Yes	1.47594	0.412187	9328518	9329018	AT4G16560	NA	Yes	Yes	4.50717	7.56259	Chr4	9324745	9328628	+	136	+	1174	interaction137229	1066	47	0.070444	0	19	0.070444	1900	-41.823	107	1128	-20.432	2800	-56	1.64094	4.95e-13	NA	NA
3824489	3824989	AT1G11362	Chr1	3824509	3825196	NA	NA	Yes	1.08557	0.901237	3823012	3823512	AT1G11360	NA	NA	Yes	0.241852	0.327452	Chr1	3821442	3823088	+	1506	+	810	interaction6981	1477	65	0.070444	0	28	0.070444	2800	-69.3961	1395	659	-20.3893	3700	-82	0.142014	NA	0.108927	0.65494
19900959	19901459	AT3G53700	Chr3	19900279	19902884	NA	Yes	Yes	4.11536	6.53528	19898991	19899491	AT3G53690	NA	Yes	Yes	0.810982	1.41586	Chr3	19898787	19900065	+	1853	+	64	interaction118599	1968	24	0.070444	0	6	0.070444	600	-7.80345	1654	30	-20.3313	1800	-22	-0.0621243	0.856288	-0.391105	0.736577
2633963	2634463	AT4G05120	Chr4	2632692	2635000	NA	NA	NA	0.118857	0.2103	2628473	2628973	AT4G05110	Yes	NA	Yes	3.43563	1.73292	Chr4	2626404	2628830	+	109	+	1323	interaction129121	5490	16	0.070444	0	2	0.070444	200	-1.3309	104	1330	-20.1759	1400	-12	0.137222	0.822829	0.0608187	0.871843
17137533	17138033	AT2G41100	Chr2	17137828	17139612	NA	Yes	Yes	2.97231	4.72454	17135945	17136445	AT2G41090	NA	NA	NA	0.162627	0.275186	Chr2	17135720	17136852	+	644	+	155	interaction82936	1588	19	0.070444	0	3	0.070444	300	-2.52889	558	167	-20.118	1600	-16	1.14927	0.156298	-0.399721	0.165217
25411519	25412019	AT1G67775	Chr1	25411311	25411696	Yes	NA	Yes	0.264542	0.312443	25406014	25406514	AT1G67760	NA	Yes	Yes	13.4108	20.9987	Chr1	25405579	25406372	+	109	+	1938	interaction47750	5505	16	0.070444	0	2	0.070444	200	-1.3309	113	1704	-20.1079	1400	-12	NA	NA	-0.117473	0.935258
7494006	7494506	AT1G21400	Chr1	7493425	7496710	NA	NA	NA	0.163733	0.258329	7491485	7491985	AT1G21395	NA	NA	Yes	1.25414	0.827515	Chr1	7491964	7492339	+	1993	+	516	interaction14388	2521	40	0.070444	0	13	0.070444	1300	-23.644	1647	406	-20.0711	2700	-44	0.59145	0.0128884	1.21356	NA
17465049	17465549	AT4G37070	Chr4	17464784	17467109	NA	NA	Yes	0.185515	0.253193	17463477	17463977	AT4G37060	NA	NA	Yes	2.72596	2.16516	Chr4	17461365	17463734	+	147	+	1262	interaction153319	1572	44	0.070444	0	17	0.070444	1700	-35.7472	99	1256	-20.0703	2700	-52	0.499904	0.0911583	0.0387821	0.988703
22533897	22534397	AT5G55640	Chr5	22533158	22534117	NA	NA	NA	5.66369	7.96729	22531574	22532074	AT5G55630	NA	NA	Yes	0.160839	0.248968	Chr5	22531357	22533122	+	111	+	1342	interaction191305	2323	29	0.070444	0	8	0.070444	800	-11.7462	86	1232	-20.0591	2100	-28	0.201296	0.483554	0.0496756	0.891889
4503879	4504379	AT3G13740	Chr3	4504269	4506311	NA	NA	NA	0.201465	0.315962	4500476	4500976	AT3G13730	Yes	NA	Yes	2.45061	1.83153	Chr3	4497975	4500920	+	90	+	1908	interaction96474	3403	18	0.070444	0	3	0.070444	300	-2.5477	46	1882	-20.0579	1500	-14	0.0944529	0.724198	0.0319304	0.951798
19679576	19680076	AT5G48550	Chr5	19678916	19680560	Yes	NA	Yes	10.5942	3.50281	19676552	19677052	AT5G48545	NA	NA	NA	0.202197	0.245399	Chr5	19676116	19678109	+	667	+	48	interaction185804	3024	12	0.070444	9.5e-05	1	0.070444	100	-0.449504	779	32	-20.0566	1100	-8	1.24377	0.545154	-0.0498801	0.874557
20910068	20910568	AT3G56400	Chr3	20908927	20910481	NA	NA	Yes	0.140007	0.237076	20906984	20907484	AT3G56390	NA	NA	Yes	2.94171	2.28083	Chr3	20907353	20907697	+	631	+	165	interaction120364	3084	16	0.070444	0	2	0.070444	200	-1.3309	567	136	-19.977	1400	-12	-0.415365	0.264339	NA	NA
7899045	7899545	AT1G22370	Chr1	7898012	7899879	NA	NA	Yes	1.86236	1.36759	7897493	7897993	AT1G22360	NA	NA	Yes	2.70603	3.39888	Chr1	7894857	7897591	+	1032	+	245	interaction15113	1552	30	0.070444	0	8	0.070444	800	-11.6112	912	177	-19.9637	2200	-30	0.201889	0.623456	0.475818	0.00188701
117962	118462	AT2G01200	Chr2	118016	119342	NA	NA	NA	3.24145	0.814151	115232	115732	AT2G01190	NA	NA	Yes	0.164608	0.308689	Chr2	114974	117640	+	172	+	763	interaction58499	2730	16	0.070444	0	2	0.070444	200	-1.3309	147	583	-19.9296	1400	-12	-0.246842	0.939914	0.616936	0.0138079
5175882	5176382	AT3G15351	Chr3	5176058	5177648	NA	NA	NA	3.60695	1.27897	5174593	5175093	AT3G15356	NA	Yes	Yes	0.898021	1.67245	Chr3	5174401	5175469	+	416	+	804	interaction97211	1289	24	0.070444	0	5	0.070444	500	-5.62926	334	781	-19.8387	1900	-22	0.350965	0.188922	0.514689	0.0117639
294005	294505	AT4G00720	Chr4	293640	297314	NA	NA	Yes	0.129835	0.201596	290891	291391	AT4G00710	NA	NA	Yes	0.127435	0.222067	Chr4	290047	293453	+	103	+	1155	interaction125479	3114	29	0.070444	0	8	0.070444	800	-11.7235	94	1230	-19.7846	2100	-30	0.107258	0.640744	-0.0497053	0.86142
18779551	18780051	AT2G45570	Chr2	18779792	18781958	NA	Yes	Yes	0.145895	0.228153	18777970	18778470	AT2G45560	NA	NA	Yes	0.744384	0.989874	Chr2	18776051	18778510	+	492	+	1251	interaction86689	1581	19	0.070444	0	3	0.070444	300	-2.52482	403	1028	-19.7192	1600	-14	2.79369	0.0300645	-0.186582	0.428959
14633987	14634487	AT2G34700	Chr2	14634133	14635627	NA	Yes	Yes	0.124137	0.188599	14630100	14630600	AT2G34690	NA	NA	NA	0.191051	0.322084	Chr2	14630306	14632061	+	85	+	870	interaction78022	3887	21	0.070444	0	4	0.070444	400	-3.99616	102	718	-19.7128	1700	-18	-0.984867	NA	0.235034	0.200767
412125	412625	AT5G02090	Chr5	412030	412698	NA	Yes	Yes	0.790767	0.653861	409509	410009	AT5G02080	NA	Yes	NA	0.215456	0.323704	Chr5	409810	411557	+	1484	+	195	interaction156277	2616	49	0.070444	0	20	0.070444	2000	-44.5411	1279	144	-19.71	2900	-58	0.52823	0.130491	-0.0151074	0.989799
16588970	16589470	AT5G41450	Chr5	16588599	16589094	NA	NA	Yes	0.376143	0.525033	16587462	16587962	AT5G41440	NA	NA	Yes	1.33986	0.509905	Chr5	16587234	16587609	+	284	+	915	interaction180064	1508	37	0.070444	0	12	0.070444	1200	-21.227	178	902	-19.6551	2500	-40	-2.61046	NA	NA	NA
9407011	9407511	AT3G25770	Chr3	9406872	9407955	Yes	NA	Yes	3.55092	1.36155	9397916	9398416	AT3G25740	NA	Yes	Yes	0.887623	0.367579	Chr3	9397785	9399762	+	790	+	1738	interaction106092	9095	24	0.071007	0	5	0.070444	500	-5.62026	635	1541	-19.6072	1880.94	-22	1.36574	2.54e-37	0.179091	0.52119
11542019	11542519	AT1G32090	Chr1	11540024	11544131	NA	NA	NA	0.147491	0.247271	11539043	11539543	AT1G32080	NA	NA	NA	0.207443	0.266754	Chr1	11537341	11539800	+	51	+	1683	interaction22780	2976	12	0.070444	0.000103	1	0.070444	100	-0.451865	43	1838	-19.5882	1100	-8	0.13323	0.737775	-0.20474	0.165851
9736991	9737491	AT5G27580	Chr5	9736650	9737322	NA	NA	Yes	0.131636	0.235786	9736006	9736506	AT5G27570	NA	NA	Yes	0.248227	0.345321	Chr5	9734895	9736131	+	1027	+	1517	interaction174307	985	101	0.080572	0	76	0.112811	4745.73	-259.582	1195	1976	-19.5825	4084.66	-146	1.58166	NA	NA	NA
17926505	17927005	AT5G44495	Chr5	17926350	17926710	NA	NA	Yes	0.172033	0.249273	17924597	17925097	AT5G44490	NA	NA	Yes	2.11988	1.47566	Chr5	17924034	17925843	+	135	+	1674	interaction182508	1908	44	0.070444	0	17	0.070444	1700	-35.4624	125	1685	-19.569	2700	-52	-2.61046	NA	0.259348	0.516973
23214897	23215397	AT3G62750	Chr3	23214370	23217045	NA	Yes	Yes	1.38139	2.08027	23212483	23212983	AT3G62740	NA	NA	NA	0.122184	0.254071	Chr3	23211415	23213888	+	452	+	369	interaction124755	2414	16	0.070444	0	2	0.070444	200	-1.33089	493	429	-19.5561	1400	-12	-0.336491	0.0156128	0.75946	0.000113182
16098586	16099086	AT5G40275	Chr5	16098189	16100051	NA	NA	Yes	1.01534	1.10292	16097051	16097551	AT5G40270	NA	NA	Yes	0.336639	0.341272	Chr5	16093171	16097232	+	62	+	1588	interaction179169	1535	20	0.070444	0	4	0.070444	400	-4.03381	48	1159	-19.52	1600	-18	0.884748	NA	-0.221128	0.398606
19948922	19949422	AT5G49200	Chr5	19947795	19949055	NA	Yes	Yes	2.6983	1.95726	19946991	19947491	AT5G49190	NA	NA	Yes	0.161796	0.270373	Chr5	19943281	19947189	+	340	+	1517	interaction186059	1931	56	0.070444	0	24	0.070444	2400	-57.0754	199	1568	-19.4428	3200	-70	-0.0372091	NA	-0.40163	0.700612
11393835	11394335	AT2G26740	Chr2	11392964	11394279	NA	NA	Yes	0.284729	0.418012	11388493	11388993	AT2G26730	NA	NA	NA	0.161771	0.223746	Chr2	11388406	11391641	+	608	+	128	interaction69795	5342	23	0.070444	0	5	0.070444	500	-5.67655	549	97	-19.42	1800	-20	0.376494	0.00332589	-0.267098	0.120019
10734458	10734958	AT4G19730	Chr4	10733863	10734975	Yes	NA	Yes	0.184581	0.261509	10729445	10729945	AT4G19710	NA	NA	Yes	0.417888	0.537451	Chr4	10724854	10729768	+	1774	+	76	interaction140244	5013	15	0.070444	0	2	0.070444	200	-1.33097	1900	39	-19.3715	1300	-10	NA	NA	-0.233418	0.120378
26836516	26837016	AT5G67260	Chr5	26836147	26837811	NA	NA	NA	3.09696	0.595168	26832951	26833451	AT5G67250	NA	NA	NA	0.143151	0.296165	Chr5	26831372	26833333	+	909	+	74	interaction198459	3565	12	0.070444	0.00015	1	0.070444	100	-0.45305	773	52	-19.3667	1100	-8	0.0309542	0.92699	0.219169	0.16906
18534589	18535089	AT5G45690	Chr5	18534998	18536316	NA	Yes	Yes	7.33616	13.2537	18531459	18531959	AT5G45680	NA	NA	NA	0.243559	0.313998	Chr5	18530879	18532337	+	61	+	950	interaction183749	3130	15	0.070444	0	2	0.070444	200	-1.33097	40	889	-19.3115	1300	-10	1.7503	0.100608	-0.0459025	0.896388
26829834	26830334	AT1G71160	Chr1	26828700	26830208	NA	Yes	Yes	0.242338	0.292922	26823465	26823965	AT1G71130	NA	NA	NA	0.292737	0.428303	Chr1	26822787	26823530	+	885	+	76	interaction51234	6369	12	0.070444	0.000153	1	0.070444	100	-0.453454	971	56	-19.293	1100	-8	NA	NA	0.0878941	0.824334
16897596	16898096	AT4G35600	Chr4	16896201	16898876	NA	NA	Yes	2.92303	0.772882	16893985	16894485	AT4G35590	NA	NA	Yes	0.37515	0.612531	Chr4	16892908	16894865	+	608	+	65	interaction152299	3611	12	0.070444	0.000134	1	0.070444	100	-0.453454	548	56	-19.293	1100	-8	0.312796	0.116852	-0.274758	0.903887
14572006	14572506	AT5G36930	Chr5	14567621	14572630	NA	NA	NA	0.15184	0.222396	14565950	14566450	AT5G36925	Yes	NA	Yes	2.31598	1.74237	Chr5	14565812	14566244	+	54	+	1312	interaction175171	6056	12	0.070444	0.00011	1	0.070444	100	-0.453454	56	1123	-19.293	1100	-8	-0.176664	0.599806	1.49533	0.000102928
7674439	7674939	AT4G13220	Chr4	7674287	7675313	Yes	NA	Yes	3.75086	2.4871	7671526	7672026	AT4G13210	NA	Yes	Yes	5.47125	10.2753	Chr4	7669947	7673376	+	1678	+	181	interaction133786	2913	46	0.070444	0	18	0.070444	1800	-38.2309	1714	160	-19.2643	2800	-54	0.0207006	0.956373	-0.618233	0.318822
16545385	16545885	AT2G39700	Chr2	16543831	16545584	NA	NA	Yes	1.42292	1.00113	16540103	16540603	AT2G39681	NA	NA	NA	0.120111	0.20737	Chr2	16539383	16540417	+	698	+	89	interaction81597	5282	12	0.070444	0.000171	1	0.070444	100	-0.45372	649	59	-19.2449	1100	-8	-0.370694	0.0336349	0.0376264	0.946716
15617518	15618018	AT4G32350	Chr4	15617465	15620910	NA	NA	NA	0.750483	0.361712	15612528	15613028	AT4G32340	NA	NA	Yes	0.366997	0.515056	Chr4	15612583	15614305	+	1802	+	83	interaction149968	4990	12	0.070444	0.000163	1	0.070444	100	-0.454109	1469	64	-19.1755	1100	-8	0.941054	8.91e-08	-0.0346273	0.95515
18778029	18778529	AT2G45560	Chr2	18776051	18778510	NA	NA	Yes	0.252984	0.369888	18772459	18772959	AT2G45540	NA	NA	NA	0.203356	0.304386	Chr2	18757488	18772831	+	1251	+	195	interaction86677	5570	21	0.070444	0	4	0.070444	400	-3.98313	1028	170	-19.1576	1700	-18	-0.186582	0.428959	-0.406407	0.0236051
3255992	3256492	AT5G10350	Chr5	3255304	3257807	NA	NA	NA	0.530441	0.858447	3254083	3254583	AT5G10340	NA	NA	Yes	2.66487	2.77224	Chr5	3253121	3255045	+	76	+	1569	interaction162261	1909	37	0.070444	0	14	0.070444	1400	-27.3343	70	1556	-19.1317	2300	-42	-0.0547901	0.868407	-0.58545	NA
22679521	22680021	AT1G61475	Chr1	22679769	22680771	NA	NA	NA	1.78095	0.336698	22678035	22678535	AT1G61470	NA	NA	NA	0.443391	0.367216	Chr1	22678184	22679021	+	494	+	752	interaction39249	1486	32	0.070444	0	9	0.070444	900	-13.7522	523	753	-19.1159	2300	-32	NA	NA	0.333174	0.739187
620516	621016	AT1G02813	Chr1	620677	621289	NA	Yes	Yes	7.23633	14.8225	618488	618988	AT1G02810	NA	Yes	Yes	5.25125	9.05653	Chr1	618264	620480	+	1247	+	1426	interaction1448	2028	75	0.091963	0	34	0.089466	2677.08	-90.0008	1189	1575	-19.0917	3067.92	-100	1.49455	NA	-0.0628184	0.89705
18513565	18514065	AT1G49990	Chr1	18513627	18515099	NA	NA	NA	0.153033	0.208996	18508606	18509106	AT1G49980	NA	NA	NA	0.130155	0.213008	Chr1	18507970	18513172	+	85	+	949	interaction28667	4959	12	0.070444	0.000166	1	0.070444	100	-0.454618	72	884	-19.0857	1100	-8	0.106165	0.898847	0.0184673	0.963266
16896612	16897112	AT1G44760	Chr1	16896685	16898612	NA	NA	Yes	1.45423	0.902944	16892158	16892658	AT1G44750	NA	NA	Yes	0.150605	0.19569	Chr1	16892638	16895465	+	64	+	1265	interaction25681	4454	15	0.070444	0	2	0.070444	200	-1.33095	45	1089	-19.058	1300	-10	0.051478	0.879712	-0.109044	0.74613
3314096	3314596	AT3G10600	Chr3	3313968	3317162	Yes	NA	Yes	1.81885	0.704775	3312020	3312520	AT3G10595	Yes	NA	Yes	8.21347	3.68757	Chr3	3311784	3312831	+	1819	+	178	interaction94440	2076	71	0.070444	0	37	0.070444	3700	-105.058	1642	146	-19.0225	3400	-98	-0.173781	0.912166	NA	NA
13197947	13198447	AT4G26000	Chr4	13197245	13199836	NA	NA	Yes	0.195129	0.27068	13192893	13193393	AT4G25990	NA	NA	Yes	1.15707	0.640134	Chr4	13191689	13193543	+	1433	+	205	interaction146610	5054	12	0.070444	0.000236	1	0.070444	100	-0.455071	1509	81	-19.0071	1100	-8	0.0170954	0.964214	0.226703	0.725628
18443010	18443510	AT1G49820	Chr1	18442881	18445098	NA	NA	NA	10.629	7.14179	18436855	18437355	AT1G49790	NA	NA	Yes	0.710301	0.476188	Chr1	18435350	18437068	+	69	+	544	interaction28408	6155	12	0.070444	0.000142	1	0.070444	100	-0.455158	83	518	-18.9921	1100	-8	-0.192975	0.300059	0.343901	0.784125
490560	491060	AT1G02410	Chr1	490924	492926	NA	NA	Yes	0.159949	0.259375	480486	480986	AT1G02390	NA	Yes	Yes	9.09137	17.5083	Chr1	480851	483292	+	105	+	1362	interaction980	10074	12	0.070444	0.000187	1	0.070444	100	-0.455281	86	1212	-18.971	1100	-8	-0.00907839	0.982631	-0.462408	0.16057
23531905	23532405	AT1G63450	Chr1	23531408	23534569	NA	NA	Yes	4.36207	2.21965	23516481	23516981	AT1G63420	NA	NA	Yes	0.220418	0.208753	Chr1	23515873	23518910	+	1496	+	110	interaction41553	15424	12	0.070444	0.000191	1	0.070444	100	-0.45532	1606	87	-18.9643	1100	-8	0.0658094	0.942607	-0.0235505	0.959864
16737410	16737910	AT4G35170	Chr4	16736756	16738437	Yes	NA	Yes	8.8329	6.55431	16726935	16727435	AT4G35150	NA	NA	Yes	6.1912	8.42594	Chr4	16726947	16728531	+	1509	+	123	interaction151877	10475	12	0.070444	0.000201	1	0.070444	100	-0.455468	1361	91	-18.939	1100	-8	0.205404	0.946748	-1.60131	NA
879975	880475	AT2G03010	Chr2	879246	881471	NA	NA	Yes	4.50717	7.56259	873513	874013	AT2G02990	NA	Yes	Yes	1.31715	1.55697	Chr2	873505	874811	+	357	+	83	interaction59305	6462	12	0.070444	0.000163	1	0.070444	100	-0.455503	342	92	-18.933	1100	-8	0.0370482	0.968559	0.759495	0.224686
18889586	18890086	AT1G50960	Chr1	18889548	18891719	Yes	NA	Yes	2.46921	0.779551	18886401	18886901	AT1G50954	NA	NA	Yes	1.02403	0.209155	Chr1	18886532	18886628	+	1010	+	82	interaction28822	3185	20	0.070444	0	4	0.070444	400	-4.02038	1222	59	-18.9133	1600	-16	0.459755	0.821029	NA	NA
20058063	20058563	AT1G53720	Chr1	20056532	20059638	NA	NA	NA	0.18926	0.316959	20055540	20056040	AT1G53710	NA	NA	NA	0.205679	0.285428	Chr1	20053160	20056396	+	84	+	1112	interaction32778	2523	12	0.070444	0.000165	1	0.070444	100	-0.455635	96	1080	-18.9105	1100	-8	0.105885	0.726446	-0.0807912	0.833337
116926	117426	AT3G01328	Chr3	117253	117568	NA	NA	Yes	4.90323	5.90802	115911	116411	AT3G01327	Yes	NA	Yes	2.96009	0.822955	Chr3	116230	116548	+	1179	+	1090	interaction88662	1015	32	0.070444	0	11	0.081977	945.24	-18.4521	1258	1364	-18.906	2254.76	-32	NA	NA	-0.214409	NA
2093975	2094475	AT5G06780	Chr5	2093882	2097129	NA	NA	NA	0.694867	0.992354	2092526	2093026	AT5G06770	NA	NA	Yes	0.156834	0.195244	Chr5	2090702	2092950	+	237	+	1327	interaction159883	1449	38	0.070444	0	13	0.070444	1300	-23.8782	171	1036	-18.891	2500	-42	0.116159	0.717074	0.136962	0.680155
15355874	15356374	AT3G43431	Chr3	15355848	15355986	NA	Yes	Yes	0.166936	0.220698	15354582	15355082	AT3G43430	NA	Yes	Yes	6.00857	9.19302	Chr3	15354534	15355304	+	413	+	1864	interaction110012	1292	55	0.070444	0	23	0.070444	2300	-53.2075	368	2087	-18.889	3200	-68	NA	NA	0.323689	0.204358
23147032	23147532	AT1G62530	Chr1	23146331	23148367	Yes	NA	Yes	4.31276	4.28469	23144476	23144976	AT1G62520	NA	NA	Yes	0.239217	0.334556	Chr1	23144411	23145509	+	429	+	87	interaction40568	2556	12	0.070444	0.000168	1	0.070444	100	-0.455786	502	101	-18.8849	1100	-8	-0.189341	NA	-0.332614	0.317057
16788098	16788598	AT4G35280	Chr4	16787428	16788283	NA	NA	Yes	0.167644	0.227501	16775997	16776497	AT4G35260	NA	NA	NA	0.179691	0.260305	Chr4	16774194	16776325	+	965	+	108	interaction152063	12101	12	0.070444	0.00019	1	0.070444	100	-0.455786	947	101	-18.8849	1100	-8	NA	NA	-0.0584319	0.818641
16968909	16969409	AT3G46200	Chr3	16969265	16971204	NA	Yes	Yes	0.981544	1.2446	16956462	16956962	AT3G46180	NA	NA	Yes	0.259638	0.347657	Chr3	16954364	16956833	+	701	+	115	interaction112121	12447	12	0.070444	0.000195	1	0.070444	100	-0.455843	662	103	-18.8754	1100	-8	-0.139512	0.724587	-0.190347	0.570858
7319419	7319919	AT4G12330	Chr4	7317559	7319739	NA	NA	Yes	0.197329	0.230259	7316363	7316863	AT4G12320	NA	NA	Yes	1.19669	1.40733	Chr4	7314777	7316669	+	117	+	589	interaction132915	3056	12	0.070444	0.000196	1	0.070444	100	-0.45587	104	454	-18.8708	1100	-8	0.304044	0.489258	-0.327648	0.18796
26625569	26626069	AT5G66690	Chr5	26625079	26626793	NA	Yes	Yes	0.233615	0.284976	26620046	26620546	AT5G66680	NA	NA	NA	0.148836	0.235827	Chr5	26617543	26620667	+	658	+	133	interaction197895	5523	12	0.070444	0.000207	1	0.070444	100	-0.45587	648	104	-18.8708	1100	-8	-0.0965184	0.766342	-0.181052	0.280451
3957510	3958010	AT1G11730	Chr1	3957472	3960113	NA	NA	NA	0.209928	0.27782	3950020	3950520	AT1G11710	NA	NA	NA	0.118037	0.221534	Chr1	3948713	3951359	+	544	+	115	interaction7570	7490	12	0.070444	0.000195	1	0.070444	100	-0.455974	655	108	-18.8533	1100	-8	-0.208338	0.81997	-0.147848	0.829753
3157475	3157975	AT3G10200	Chr3	3157607	3160188	NA	NA	Yes	0.430083	0.280934	3155394	3155894	AT3G10190	NA	Yes	Yes	3.59673	6.56567	Chr3	3155297	3156143	+	140	+	1252	interaction94300	2081	40	0.070444	0	15	0.070444	1500	-29.719	109	950	-18.8388	2500	-46	-0.162438	0.767784	-0.196188	0.561703
5581500	5582000	AT3G16430	Chr3	5581662	5583187	Yes	NA	Yes	0.771487	0.510814	5579454	5579954	AT3G16420	Yes	NA	Yes	4.11624	1.999	Chr3	5579385	5580953	+	855	+	1136	interaction97918	2046	63	0.070444	0	28	0.070444	2800	-69.5165	541	944	-18.8333	3500	-80	0.624021	0.000234038	0.549818	2.42e-06
314474	314974	AT3G01910	Chr3	314693	317431	NA	Yes	NA	0.810991	0.455496	313493	313993	AT3G01900	NA	Yes	Yes	10.1952	23.6139	Chr3	312358	313849	+	313	+	1752	interaction89472	981	53	0.070444	0	22	0.070444	2200	-50.1676	292	1794	-18.8076	3100	-64	-0.0178318	0.951798	0.488893	0.781625
15991038	15991538	AT5G39950	Chr5	15990686	15991931	NA	NA	NA	0.157332	0.233302	15987684	15988184	AT5G39940	NA	NA	Yes	0.745999	0.885309	Chr5	15987460	15990701	+	164	+	433	interaction179017	3354	12	0.070444	0.000222	1	0.070444	100	-0.456379	127	227	-18.7856	1100	-8	0.145196	0.461801	-0.0778443	0.841607
25885955	25886455	AT1G68860	Chr1	25886535	25886609	NA	NA	NA	3.88949	7.50344	25884507	25885007	AT1G68850	NA	NA	Yes	4.49991	3.52939	Chr1	25883615	25885247	+	295	+	764	interaction49018	1448	35	0.070444	0	11	0.070444	1100	-18.5991	252	786	-18.7845	2400	-36	NA	NA	0.119703	0.689458
13410891	13411391	AT2G31480	Chr2	13408977	13410999	Yes	NA	Yes	0.184713	0.255122	13408020	13408520	AT2G31470	Yes	NA	Yes	4.36207	2.21965	Chr2	13407491	13408655	+	156	+	1190	interaction74768	2871	12	0.070444	0.000219	1	0.070444	100	-0.456483	133	1570	-18.7684	1100	-8	0.427159	0.841142	1.13138	NA
4132593	4133093	AT1G12190	Chr1	4132966	4134094	Yes	NA	Yes	6.35586	2.34705	4126453	4126953	AT1G12160	NA	NA	Yes	5.05199	3.43852	Chr1	4126065	4128310	+	205	+	1691	interaction8046	6140	12	0.070444	0.000236	1	0.070444	100	-0.456547	137	1903	-18.7577	1100	-8	-1.60131	NA	0.349313	0.303605
11561951	11562451	AT4G21760	Chr4	11561228	11563950	NA	NA	Yes	0.249357	0.314176	11557539	11558039	AT4G21750	NA	NA	Yes	5.33882	5.37729	Chr4	11555185	11560733	+	909	+	113	interaction141789	4412	12	0.070444	0.000193	1	0.070444	100	-0.456562	802	138	-18.7552	1100	-8	-0.729034	0.0973651	-0.292107	0.0330476
13017499	13017999	AT2G30560	Chr2	13017346	13018857	NA	NA	NA	0.157129	0.262524	13015459	13015959	AT2G30550	NA	NA	NA	0.529751	0.617764	Chr2	13014847	13017153	+	593	+	186	interaction73798	2040	12	0.070444	0.00023	1	0.070444	100	-0.456665	598	145	-18.7383	1100	-8	0.550928	NA	0.354406	0.15368
10630325	10630825	AT1G30210	Chr1	10627184	10630610	NA	NA	Yes	0.691042	0.850414	10625020	10625520	AT1G30200	NA	NA	NA	0.241933	0.33759	Chr1	10625028	10627105	+	727	+	165	interaction20943	5305	12	0.070444	0.000223	1	0.070444	100	-0.456732	518	150	-18.7273	1100	-8	-0.294028	0.164159	0.239976	0.165217
898505	899005	AT1G03600	Chr1	898875	899655	NA	NA	Yes	0.377775	0.697839	897070	897570	AT1G03590	NA	NA	NA	0.117846	0.202764	Chr1	894253	897518	+	1958	+	424	interaction1910	1435	73	0.070444	0	36	0.070444	3600	-98.6557	1450	316	-18.7039	3700	-98	-0.0875007	0.679082	0.0656948	0.844569
14433040	14433540	AT4G29290	Chr4	14432740	14433084	NA	NA	Yes	8.6274	2.9918	14430416	14430916	AT4G29283	NA	NA	Yes	2.47114	0.969949	Chr4	14430222	14430601	+	638	+	203	interaction148994	2624	12	0.070444	0.000236	1	0.070444	100	-0.456876	671	162	-18.7036	1100	-8	NA	NA	NA	NA
2863453	2863953	AT3G09320	Chr3	2861742	2864245	NA	NA	Yes	1.30254	0.685239	2861026	2861526	AT3G09310	NA	NA	NA	0.127128	0.206867	Chr3	2860401	2861359	+	1358	+	278	interaction93582	2427	40	0.070444	0	14	0.070444	1400	-26.4565	1224	240	-18.6894	2600	-44	0.0442364	0.912476	-0.221234	0.750079
18525628	18526128	AT3G49960	Chr3	18524083	18525687	NA	NA	Yes	6.73316	13.8215	18522654	18523154	AT3G49950	NA	Yes	Yes	10.0455	20.7367	Chr3	18522509	18523906	+	200	+	1125	interaction115693	2974	12	0.070444	0.000235	1	0.070444	100	-0.457056	180	1050	-18.6741	1100	-8	-0.168663	0.542716	-0.168197	0.921559
18304547	18305047	AT3G49370	Chr3	18304741	18307906	NA	NA	NA	1.89126	0.467168	18303433	18303933	AT3G49360	NA	NA	Yes	1.62321	1.75275	Chr3	18303045	18304416	+	180	+	782	interaction115178	1114	12	0.070444	0.000228	1	0.070444	100	-0.457074	182	750	-18.6712	1100	-8	0.109139	0.856175	0.0696129	0.864389
5963394	5963894	AT5G18010	Chr5	5962896	5963405	NA	NA	Yes	0.40215	0.261258	5961086	5961586	AT5G18000	NA	NA	Yes	0.214602	0.353733	Chr5	5959899	5961642	+	336	+	1314	interaction166638	2308	12	0.070444	0.00026	1	0.070444	100	-0.457211	199	1111	-18.6489	1100	-8	-0.145472	0.850472	0.574158	0.834245
1013070	1013570	AT2G03330	Chr2	1008459	1014122	NA	NA	Yes	4.96455	3.84312	1005846	1006346	AT2G03310	NA	NA	Yes	0.35627	0.458338	Chr2	1006255	1007183	+	276	+	477	interaction59563	7224	12	0.070444	0.000252	1	0.070444	100	-0.457333	217	560	-18.6292	1100	-8	0.00956176	0.984986	0.215844	0.52074
10340520	10341020	AT1G29590	Chr1	10339936	10342848	NA	NA	NA	0.263751	0.315951	10337486	10337986	AT1G29570	NA	NA	Yes	0.123515	0.219753	Chr1	10335909	10337854	+	1647	+	75	interaction20314	3034	26	0.070444	0	7	0.070444	700	-9.60933	1867	74	-18.6035	1900	-26	0.0327913	0.969416	NA	NA
18308439	18308939	AT2G44304	Chr2	18308757	18308913	NA	NA	NA	5.72434	3.47326	18307460	18307960	AT2G44300	NA	NA	Yes	0.981087	1.12576	Chr2	18307308	18308349	+	47	+	1839	interaction86053	979	14	0.070444	0	2	0.070444	200	-1.33123	19	1635	-18.5987	1200	-10	NA	NA	-0.311117	0.174438
16609434	16609934	AT5G41520	Chr5	16609152	16610692	NA	NA	NA	0.544892	0.643195	16607533	16608033	AT5G41510	Yes	NA	Yes	8.17503	5.29791	Chr5	16607123	16608326	+	86	+	1924	interaction180200	1901	17	0.070444	0	3	0.070444	300	-2.55422	37	2066	-18.5441	1400	-14	0.032819	0.898375	NA	NA
9434438	9434938	AT1G27170	Chr1	9433487	9439417	NA	Yes	Yes	0.269362	0.473755	9425524	9426024	AT1G27130	NA	NA	Yes	0.168426	0.289273	Chr1	9425459	9426886	+	758	+	1240	interaction18198	8914	12	0.070444	0.000282	1	0.070444	100	-0.458243	674	1146	-18.4837	1100	-8	-0.0692597	0.905795	0.449537	0.00238139
6097102	6097602	AT3G17820	Chr3	6097413	6099595	NA	NA	NA	3.54668	2.29622	6095395	6095895	AT3G17810	NA	NA	NA	0.14971	0.230862	Chr3	6094097	6096566	+	598	+	1070	interaction98607	1707	35	0.070444	0	11	0.070444	1100	-18.5435	360	1199	-18.4354	2400	-36	-0.0742311	0.763088	0.0294275	0.936444
29395455	29395955	AT1G78120	Chr1	29393938	29396086	NA	NA	Yes	0.271872	0.387807	29393041	29393541	AT1G78110	NA	NA	Yes	0.141215	0.274292	Chr1	29391826	29393334	+	889	+	84	interaction56230	2414	26	0.070444	0	7	0.070444	700	-9.59518	773	79	-18.4091	1900	-26	-0.0603114	0.880851	-0.144635	0.657427
19006571	19007071	AT5G46840	Chr5	19005600	19007770	NA	NA	NA	0.137538	0.22238	18991968	18992468	AT5G46810	Yes	NA	Yes	2.79696	0.900326	Chr5	18991163	18993376	+	125	+	1586	interaction185054	14603	18	0.070444	0	3	0.070444	300	-2.53081	131	1482	-18.3955	1500	-14	0.141061	0.518538	1.96386	NA
2857525	2858025	AT3G09300	Chr3	2857846	2860668	NA	NA	NA	2.37383	1.37139	2856009	2856509	AT3G09290	Yes	NA	Yes	6.48341	6.32191	Chr3	2856140	2856659	+	471	+	1434	interaction93474	1516	57	0.070444	0	25	0.070444	2500	-59.948	290	1256	-18.3951	3200	-70	0.0176437	0.963954	-0.284898	0.851282
17316062	17316562	AT3G47000	Chr3	17313645	17316566	NA	NA	NA	0.239605	0.262024	17312413	17312913	AT3G46990	NA	NA	NA	0.195756	0.336356	Chr3	17311671	17313752	+	596	+	116	interaction113050	3649	18	0.070444	0	3	0.070444	300	-2.53068	588	133	-18.3836	1500	-14	0.0920512	0.710759	-0.551907	0.0972636
20892564	20893064	AT5G51450	Chr5	20892642	20897817	NA	NA	NA	0.265291	0.424736	20891038	20891538	AT5G51440	NA	NA	NA	0.165631	0.268224	Chr5	20891162	20892211	+	163	+	811	interaction187364	1526	30	0.070444	0	9	0.070444	900	-13.9799	104	783	-18.3791	2100	-30	-0.182483	0.55163	-0.138253	0.725628
19377891	19378391	AT2G47200	Chr2	19377728	19378331	NA	Yes	Yes	7.23522	5.94942	19376586	19377086	AT2G47190	NA	Yes	Yes	1.07657	0.794948	Chr2	19376201	19377531	+	581	+	171	interaction87778	1305	18	0.070444	0	3	0.070444	300	-2.53061	367	134	-18.3778	1500	-14	0.260225	0.573127	0.726648	0.478081
26752066	26752566	AT1G70949	Chr1	26752400	26752664	NA	Yes	Yes	0.141763	0.226559	26749070	26749570	AT1G70944	NA	NA	Yes	0.767067	0.767852	Chr1	26749136	26749253	+	791	+	1776	interaction51031	2996	45	0.072652	0	16	0.070444	1600	-31.7445	798	1598	-18.3297	2763.23	-50	NA	NA	1.21356	NA
10232080	10232580	AT3G27640	Chr3	10232247	10235621	NA	NA	NA	3.63816	1.67295	10231388	10231888	AT3G27630	NA	NA	Yes	0.859828	1.26623	Chr3	10231115	10231418	+	1377	+	40	interaction107940	692	11	0.070444	0.001021	1	0.070444	100	-0.443924	1107	20	-18.2949	1000	-6	-0.526828	0.268401	0.346957	0.766674
7899928	7900428	AT1G22380	Chr1	7900386	7902332	NA	NA	Yes	4.61761	5.75624	7899045	7899545	AT1G22370	NA	NA	Yes	1.86236	1.36759	Chr1	7898012	7899879	+	1297	+	1032	interaction15135	883	76	0.070444	0	37	0.070444	3700	-101.005	1086	912	-18.2493	3900	-102	0.782301	0.178153	0.201889	0.623456
10289044	10289544	AT1G29395	Chr1	10288196	10289621	NA	Yes	Yes	0.918239	1.83137	10287582	10288082	AT1G29390	NA	NA	NA	0.157795	0.282475	Chr1	10286292	10288103	+	199	+	1586	interaction20166	1462	52	0.070444	0	23	0.070444	2300	-54.4671	130	1325	-18.1968	2900	-64	-0.0709152	0.923939	-0.228051	0.311022
7177458	7177958	AT4G11960	Chr4	7174885	7177840	NA	NA	NA	0.101907	0.154531	7174019	7174519	AT4G11950	NA	NA	Yes	1.58976	1.37852	Chr4	7173275	7174259	+	245	+	1891	interaction132311	3439	61	0.070444	0	29	0.070444	2900	-74.551	173	1668	-18.1413	3200	-78	0.197645	0.24865	0.222104	0.851383
13032	13532	AT3G01050	Chr3	13229	14675	NA	NA	NA	2.76821	2.95935	8995	9495	AT3G01040	NA	NA	NA	0.112024	0.206833	Chr3	8956	12444	+	101	+	1481	interaction88287	4037	29	0.070444	0	9	0.070444	900	-14.1119	72	1086	-18.0881	2000	-30	0.142115	0.593786	-0.0526051	0.866859
18364679	18365179	AT2G44490	Chr2	18364755	18367725	NA	NA	Yes	0.143625	0.243314	18360608	18361108	AT2G44480	Yes	NA	Yes	1.00813	0.496182	Chr2	18359733	18363088	+	1694	+	46	interaction86193	4071	11	0.070444	0.001224	1	0.070444	100	-0.445282	1707	22	-18.0362	1000	-6	0.294949	0.062901	0.706416	0.019353
6410365	6410865	AT1G18620	Chr1	6409977	6414451	NA	NA	NA	0.110879	0.203164	6409105	6409605	AT1G18610	NA	NA	NA	0.112319	0.194961	Chr1	6405644	6409297	+	740	+	176	interaction12226	1260	15	0.070444	0	2	0.070444	200	-1.3309	659	108	-17.9997	1300	-10	0.120626	0.719268	-0.0503636	0.911122
6850962	6851462	AT5G20290	Chr5	6851451	6853066	NA	NA	NA	0.764675	0.328362	6849524	6850024	AT5G20280	NA	NA	NA	0.212074	0.256756	Chr5	6844713	6850154	+	206	+	1888	interaction168386	1438	49	0.070444	0	21	0.070444	2100	-47.9432	126	1676	-17.9891	2800	-58	0.084428	0.668012	-0.115195	0.620901
19210434	19210934	AT1G51790	Chr1	19206710	19211417	NA	NA	Yes	3.90484	3.21262	19204859	19205359	AT1G51780	NA	NA	Yes	1.88738	2.05555	Chr1	19204511	19206586	+	921	+	916	interaction30329	5575	23	0.070444	0	5	0.070444	500	-5.61716	923	1127	-17.9729	1800	-20	0.269348	0.402731	0.920501	0.717074
26269508	26270008	AT1G69792	Chr1	26269978	26270078	NA	NA	Yes	3.49401	1.56653	26267382	26267882	AT1G69790	Yes	NA	Yes	1.59915	0.548735	Chr1	26266608	26269013	+	119	+	355	interaction49832	2126	15	0.070444	0	2	0.070444	200	-1.3309	114	307	-17.9634	1300	-10	NA	NA	0.538666	0.0451625
26634386	26634886	AT5G66700	Chr5	26634319	26635885	NA	NA	Yes	2.82837	0.762738	26626335	26626835	AT5G66690	NA	Yes	Yes	7.03786	12.507	Chr5	26625079	26626793	+	117	+	1254	interaction197927	8051	15	0.070444	0	2	0.070444	200	-1.3309	115	1301	-17.9577	1300	-10	1.41865	0.0526188	-0.0965184	0.766342
4011605	4012105	AT5G12390	Chr5	4010442	4012039	NA	NA	NA	7.81217	7.21839	4008880	4009380	AT5G12380	NA	NA	NA	0.108345	0.154535	Chr5	4009222	4010687	+	115	+	1060	interaction163748	2725	20	0.070444	0	4	0.070444	400	-3.99492	106	908	-17.8784	1600	-16	0.310765	0.234008	-1.88438	NA
1717612	1718112	AT5G05720	Chr5	1716870	1719541	NA	NA	Yes	0.483725	0.38309	1716024	1716524	AT5G05710	NA	NA	Yes	0.670018	0.91871	Chr5	1715874	1716499	+	1046	+	144	interaction158826	1588	41	0.070444	0	16	0.070444	1600	-32.5356	1076	120	-17.8749	2500	-46	NA	NA	0.478096	0.0448998
14201989	14202489	AT4G28740	Chr4	14200902	14202681	NA	NA	NA	0.150605	0.19569	14199038	14199538	AT4G28730	NA	NA	Yes	0.174758	0.237051	Chr4	14199095	14200901	+	331	+	187	interaction148572	2951	15	0.070444	0	2	0.070444	200	-1.3309	186	133	-17.871	1300	-10	0.046658	0.875669	-0.150222	0.523978
14251010	14251510	AT4G28880	Chr4	14251213	14254432	NA	NA	NA	0.204772	0.259872	14246990	14247490	AT4G28860	NA	NA	Yes	0.228194	0.263974	Chr4	14246282	14249544	+	771	+	1214	interaction148697	4020	31	0.070444	0	9	0.070444	900	-13.7571	480	1080	-17.8643	2200	-30	0.196487	0.26371	0.1893	0.29273
9795411	9795911	AT1G28090	Chr1	9795761	9799063	NA	NA	Yes	0.333935	0.339299	9791045	9791545	AT1G28080	NA	NA	Yes	13.1305	18.3398	Chr1	9789825	9791546	+	1467	+	182	interaction18737	4366	15	0.070444	0	2	0.070444	200	-1.3309	1095	143	-17.8327	1300	-10	-0.10262	0.755366	-0.268429	0.863605
20451581	20452081	AT1G54830	Chr1	20451082	20452671	NA	NA	Yes	0.150753	0.236049	20449058	20449558	AT1G54820	NA	NA	Yes	0.651171	0.35463	Chr1	20447315	20450861	+	1492	+	156	interaction34075	2523	20	0.070444	0	4	0.070444	400	-3.9935	1573	111	-17.8246	1600	-16	-0.0529012	0.885391	-0.562855	0.000125663
4470465	4470965	AT5G13840	Chr5	4468507	4471466	NA	NA	NA	0.527843	0.159543	4465393	4465893	AT5G13825	Yes	NA	Yes	1.90751	1.14679	Chr5	4464966	4466052	+	139	+	1702	interaction164602	5072	49	0.070444	0	22	0.070444	2200	-51.6206	104	1653	-17.8116	2700	-60	0.0667045	0.887209	-1.60131	NA
8035416	8035916	AT3G22740	Chr3	8032958	8035809	Yes	NA	Yes	0.295125	0.337991	8031002	8031502	AT3G22730	Yes	NA	Yes	7.05739	3.01592	Chr3	8031340	8032459	+	1627	+	134	interaction103114	4414	15	0.070444	0	2	0.070444	200	-1.3309	1323	150	-17.809	1300	-10	0.540262	0.0900895	NA	NA
14431645	14432145	AT4G29285	Chr4	14431525	14432290	NA	NA	Yes	0.164261	0.244073	14430451	14430951	AT4G29283	NA	NA	Yes	2.47114	0.969949	Chr4	14430222	14430601	+	1617	+	203	interaction148952	1194	37	0.070444	0	13	0.070444	1300	-23.9011	1741	162	-17.7835	2400	-40	NA	NA	NA	NA
17322392	17322892	AT3G47030	Chr3	17322118	17323545	NA	NA	Yes	0.17999	0.241611	17319550	17320050	AT3G47020	NA	NA	Yes	11.2588	11.9455	Chr3	17319861	17321077	+	1019	+	133	interaction113090	2842	20	0.070444	0	4	0.070444	400	-3.99221	1035	116	-17.7758	1600	-16	0.965651	0.128542	NA	NA
2715510	2716010	AT1G08580	Chr1	2715078	2716404	NA	Yes	Yes	0.170413	0.289472	2712506	2713006	AT1G08570	NA	NA	NA	0.170658	0.249239	Chr1	2712882	2714734	+	1391	+	94	interaction5182	3004	25	0.070444	0	7	0.070444	700	-9.66213	1432	60	-17.697	1800	-24	0.206354	0.333088	-0.6089	4.2e-06
12594563	12595063	AT5G33340	Chr5	12594466	12595952	Yes	NA	Yes	0.659315	0.701501	12588984	12589484	AT5G33320	NA	NA	NA	0.245447	0.2704	Chr5	12588837	12591748	+	851	+	37	interaction174865	5579	14	0.070444	0	2	0.070444	200	-1.33103	689	30	-17.6869	1200	-10	2.3611	NA	-0.387482	0.00119764
5174993	5175493	AT3G15356	Chr3	5174401	5175469	NA	Yes	Yes	0.57902	0.313776	5172458	5172958	AT3G15354	NA	NA	NA	0.114799	0.216394	Chr3	5169094	5172837	+	1767	+	105	interaction97202	2535	38	0.070444	0	15	0.070444	1500	-30.0642	1638	80	-17.6565	2300	-42	0.514689	0.0117639	-0.361381	0.0592458
13680001	13680501	AT4G27320	Chr4	13678463	13680924	NA	NA	Yes	0.117525	0.230208	13666484	13666984	AT4G27290	NA	NA	Yes	0.215231	0.397143	Chr4	13666280	13669202	+	168	+	1675	interaction147558	13517	20	0.070444	0	4	0.070444	400	-3.98893	131	1681	-17.6534	1600	-16	0.252328	0.196609	0.193655	0.769156
10183966	10184466	AT1G29160	Chr1	10183796	10184324	NA	Yes	Yes	7.03437	12.2725	10182375	10182875	AT1G29150	NA	NA	Yes	0.253164	0.334637	Chr1	10180517	10182703	+	1017	+	252	interaction19752	1591	15	0.070444	0	2	0.070444	200	-1.3309	912	226	-17.649	1300	-10	-0.0293047	0.96751	-0.0346103	0.904929
11693953	11694453	AT4G22070	Chr4	11691377	11694392	Yes	NA	Yes	10.3261	17.0987	11687598	11688098	AT4G22060	Yes	NA	Yes	6.42737	1.5838	Chr4	11687619	11689021	+	246	+	907	interaction142225	6355	15	0.070444	0	2	0.070444	200	-1.3309	226	814	-17.649	1300	-10	0.51219	0.097306	4.26401	NA
13755603	13756103	AT4G27550	Chr4	13755648	13759740	NA	NA	Yes	5.00695	5.28447	13754414	13754914	AT4G27540	NA	NA	NA	0.150277	0.286448	Chr4	13753209	13754745	+	1175	+	259	interaction147732	1189	40	0.070444	0	15	0.070444	1500	-29.4308	1300	159	-17.6303	2500	-44	1.82783	NA	0.304808	0.213521
6603570	6604070	AT5G19560	Chr5	6603290	6606448	Yes	NA	Yes	4.04136	1.20974	6598463	6598963	AT5G19550	NA	NA	NA	0.172427	0.234271	Chr5	6598016	6601819	+	626	+	361	interaction167711	5107	15	0.070444	0	2	0.070444	200	-1.33089	527	254	-17.6147	1300	-10	-0.107922	0.891831	-0.27641	0.0960664
9968862	9969362	AT1G28395	Chr1	9969320	9971681	NA	NA	Yes	0.188093	0.30912	9967493	9967993	AT1G28390	NA	Yes	Yes	2.93036	4.96758	Chr1	9966185	9968301	+	235	+	781	interaction19164	1369	22	0.070444	0	5	0.070444	500	-5.66967	108	882	-17.5764	1700	-18	0.0385179	0.932588	-0.19675	0.624365
20834985	20835485	AT1G55740	Chr1	20835365	20838778	NA	Yes	Yes	0.431782	0.799149	20833981	20834481	AT1G55730	NA	NA	Yes	0.367638	0.448157	Chr1	20831051	20834519	+	156	+	1472	interaction34979	1004	36	0.070444	0	13	0.070444	1300	-24.1043	111	1327	-17.5292	2300	-38	-0.465469	0.0157093	-0.0460433	0.900928
552378	552878	AT5G02490	Chr5	550034	552647	NA	NA	Yes	10.7923	15.7727	547961	548461	AT5G02480	NA	NA	NA	0.182341	0.282528	Chr5	547562	549912	+	1615	+	87	interaction156617	4417	23	0.070444	0	6	0.070444	600	-7.6211	1367	56	-17.4992	1700	-20	-0.311299	0.180709	-0.324895	0.0405571
17830548	17831048	AT5G44260	Chr5	17829625	17831225	NA	Yes	Yes	3.0804	4.02301	17825496	17825996	AT5G44250	NA	NA	NA	0.182019	0.282031	Chr5	17823744	17825762	+	900	+	104	interaction182148	5052	17	0.070444	0	3	0.070444	300	-2.5426	931	57	-17.496	1400	-14	1.2859	0.24913	0.378877	0.0819862
28781470	28781970	AT1G76700	Chr1	28780407	28783248	NA	NA	NA	0.433948	0.423653	28779463	28779963	AT1G76690	NA	NA	Yes	0.0893677	0.15428	Chr1	28778889	28780483	+	59	+	1264	interaction55298	2007	11	0.070444	0.001572	1	0.070444	100	-0.448546	29	1263	-17.4638	1000	-6	0.364961	0.0636353	-0.1776	0.573897
22439531	22440031	AT1G60940	Chr1	22439122	22442217	NA	NA	NA	2.30327	0.51366	22429581	22430081	AT1G60920	NA	NA	Yes	0.694867	0.992354	Chr1	22429691	22430267	+	561	+	746	interaction38660	9950	15	0.070444	0	2	0.070444	200	-1.33089	597	976	-17.4585	1300	-10	0.275435	0.171441	-0.115458	NA
626427	626927	AT4G01480	Chr4	626117	628055	NA	Yes	Yes	0.256449	0.36868	609471	609971	AT4G01450	Yes	NA	Yes	4.47357	2.99971	Chr4	608453	610724	+	1333	+	709	interaction126355	16956	15	0.070444	0	2	0.070444	200	-1.33089	1288	712	-17.4401	1300	-10	-0.0314797	0.919373	-0.283862	0.0920938
10265065	10265565	AT4G18650	Chr4	10263968	10265439	NA	Yes	Yes	14.7442	23.9211	10250927	10251427	AT4G18610	NA	NA	Yes	14.0839	17.2858	Chr4	10250697	10251542	+	1239	+	1137	interaction139052	14138	16	0.072855	0	2	0.070444	200	-1.33089	1112	966	-17.4151	1347.04	-12	1.47812	0.255469	0.288842	0.438019
3480025	3480525	AT3G11110	Chr3	3479978	3480455	NA	Yes	Yes	0.212907	0.280045	3476514	3477014	AT3G11100	NA	NA	NA	0.181316	0.338466	Chr3	3476186	3477405	+	2009	+	169	interaction94984	3511	45	0.070444	0	19	0.070444	1900	-41.6111	1648	123	-17.3915	2600	-52	0.678171	0.0347759	0.296835	0.0972636
23020073	23020573	AT1G62301	Chr1	23020514	23020685	NA	NA	Yes	1.96804	2.33878	23018981	23019481	AT1G62300	Yes	NA	Yes	8.68601	7.35613	Chr1	23016682	23019279	+	484	+	257	interaction40406	1092	20	0.070444	0	4	0.070444	400	-3.98091	388	192	-17.3624	1600	-16	NA	NA	0.237385	0.354122
23937468	23937968	AT1G64440	Chr1	23937029	23939899	NA	NA	NA	0.151618	0.209795	23934525	23935025	AT1G64430	NA	NA	NA	0.165768	0.283849	Chr1	23933379	23936867	+	1109	+	38	interaction42631	2943	11	0.070444	0.000947	1	0.070444	100	-0.449205	1067	31	-17.3556	1000	-6	-0.0745436	0.830786	-0.0327308	0.914131
23136980	23137480	AT1G62510	Chr1	23136368	23137191	Yes	NA	Yes	0.612989	0.735887	23131457	23131957	AT1G62490	NA	Yes	Yes	0.561178	0.788246	Chr1	23130404	23131533	+	1300	+	130	interaction40534	5523	31	0.070444	0	10	0.070444	1000	-16.3627	1286	107	-17.3458	2100	-32	0.242926	0.776344	0.56165	0.782017
4465366	4465866	AT5G13825	Chr5	4464966	4466052	Yes	NA	Yes	3.26653	6.57347	4461009	4461509	AT5G13820	NA	NA	Yes	0.162084	0.203595	Chr5	4460893	4464666	+	1702	+	117	interaction164574	4357	38	0.070444	0	15	0.070444	1500	-29.9723	1653	86	-17.2563	2300	-42	-1.60131	NA	0.101009	0.774296
21387004	21387504	AT3G57710	Chr3	21384675	21387399	NA	NA	NA	0.160535	0.323099	21380953	21381453	AT3G57680	NA	NA	NA	0.414538	0.464181	Chr3	21381053	21383629	+	83	+	1791	interaction121100	6051	34	0.070444	0	13	0.070444	1300	-24.5842	65	1963	-17.2526	2100	-38	0.0947787	0.826457	-0.0530865	0.927037
19113053	19113553	AT1G51538	Chr1	19113182	19115273	NA	NA	Yes	4.77435	2.52798	19109904	19110404	AT1G51530	NA	NA	NA	0.160977	0.279799	Chr1	19109853	19112157	+	929	+	47	interaction30031	3149	11	0.070444	0.001255	1	0.070444	100	-0.450048	844	34	-17.2206	1000	-6	-0.50161	0.810836	-0.528121	NA
13320914	13321414	AT4G26330	Chr4	13320407	13323461	Yes	NA	Yes	5.3813	3.46185	13315950	13316450	AT4G26310	NA	NA	NA	0.163958	0.236862	Chr4	13313769	13316238	+	1196	+	202	interaction146959	4964	24	0.070444	0	6	0.070444	600	-7.50502	1072	137	-17.2168	1800	-22	0.260607	0.902059	-0.119007	0.695281
9285085	9285585	AT4G16460	Chr4	9284909	9286773	NA	NA	Yes	0.12412	0.167746	9279523	9280023	AT4G16450	NA	Yes	Yes	0.485143	0.748655	Chr4	9280019	9280854	+	716	+	101	interaction137124	5562	17	0.070444	0	3	0.070444	300	-2.53919	646	68	-17.2066	1400	-14	2.12278	NA	0.0460802	0.881769
19457030	19457530	AT3G52490	Chr3	19455698	19458919	Yes	NA	Yes	8.10853	5.4245	19453082	19453582	AT3G52480	NA	Yes	Yes	4.24784	9.6824	Chr3	19452253	19453162	+	162	+	1417	interaction117650	3948	26	0.070444	0	7	0.070444	700	-9.49873	149	1102	-17.1925	1900	-24	-0.142131	0.696173	0.201885	0.486954
5879981	5880481	AT5G17810	Chr5	5880442	5884770	Yes	NA	Yes	10.8733	8.95383	5876933	5877433	AT5G17800	Yes	NA	Yes	8.72349	12.0559	Chr5	5877188	5879331	+	192	+	1385	interaction166472	3048	26	0.070444	0	7	0.070444	700	-9.49328	157	1250	-17.1289	1900	-24	-0.378407	0.84374	-0.023685	0.980147
6229520	6230020	AT5G18680	Chr5	6228164	6230537	NA	NA	NA	0.220076	0.204462	6226924	6227424	AT5G18670	NA	NA	NA	0.163168	0.301975	Chr5	6225955	6228132	+	149	+	1546	interaction167214	2596	54	0.070444	0	26	0.070444	2600	-65.155	112	1728	-17.1248	2800	-68	-0.095209	0.707431	0.0182794	0.964019
20863121	20863621	AT3G56240	Chr3	20863256	20864544	NA	NA	Yes	0.359792	0.787749	20861413	20861913	AT3G56230	NA	NA	Yes	4.43384	3.61776	Chr3	20860777	20862265	+	60	+	1502	interaction120300	1708	14	0.070444	1e-06	2	0.070444	200	-1.33098	38	1383	-17.1137	1200	-10	-0.215207	0.159794	0.269604	0.557095
21594485	21594985	AT3G58360	Chr3	21593504	21594866	Yes	NA	Yes	4.34348	1.48606	21592932	21593432	AT3G58350	Yes	NA	Yes	7.22933	2.50997	Chr3	21591451	21592962	+	1267	+	406	interaction121739	1553	34	0.070444	0	11	0.070444	1100	-18.5132	1054	471	-17.0598	2300	-34	0.920804	NA	0.439269	0.387964
7307976	7308476	AT4G12300	Chr4	7307736	7309755	NA	NA	NA	1.13287	1.23822	7304531	7305031	AT4G12290	NA	Yes	Yes	1.20362	2.5307	Chr4	7304404	7307138	+	264	+	1488	interaction132772	3445	35	0.070444	0	12	0.070444	1200	-21.2032	192	1391	-17.0474	2300	-36	-0.274614	0.191466	0.371451	0.285515
18382405	18382905	AT2G44525	Chr2	18382069	18383513	NA	NA	NA	0.474584	0.569971	18365402	18365902	AT2G44490	NA	NA	Yes	0.196303	0.25351	Chr2	18364755	18367725	+	42	+	1783	interaction86251	17003	11	0.070444	0.001092	1	0.070444	100	-0.451351	40	1775	-17.0185	1000	-6	-0.0662374	0.858948	0.294949	0.062901
11923195	11923695	AT4G22680	Chr4	11922339	11924216	Yes	NA	Yes	0.156204	0.301907	11920496	11920996	AT4G22670	NA	NA	Yes	1.42278	1.55486	Chr4	11918079	11920910	+	773	+	68	interaction143120	2699	14	0.070444	1e-06	2	0.070444	200	-1.33097	830	40	-17.0127	1200	-10	0.125888	0.921459	-0.0557498	0.816864
19128397	19128897	AT1G51590	Chr1	19128143	19132318	NA	NA	NA	8.11643	3.9019	19126052	19126552	AT1G51580	NA	NA	NA	0.151385	0.228783	Chr1	19125582	19128161	+	35	+	1555	interaction30128	2345	19	0.070444	0	5	0.070444	500	-5.92679	22	1840	-17.0033	1400	-18	-0.0720817	0.804189	-0.157316	0.607474
28251998	28252498	AT1G75280	Chr1	28251959	28253619	NA	NA	NA	1.19669	1.40733	28250517	28251017	AT1G75270	NA	NA	NA	0.138608	0.264285	Chr1	28250074	28251350	+	270	+	1147	interaction54306	1481	40	0.070444	0	15	0.070444	1500	-29.2653	218	1185	-17.0029	2500	-44	-0.110195	0.591666	0.0774326	0.842593
18537948	18538448	AT4G39970	Chr4	18536537	18538506	NA	NA	NA	0.410716	0.18194	18535366	18535866	AT4G39960	NA	NA	NA	0.117168	0.186001	Chr4	18533754	18536618	+	83	+	768	interaction155664	2582	26	0.070444	0	8	0.070444	800	-11.9171	53	953	-16.9921	1800	-26	-0.150657	0.456882	-0.140964	0.622482
3019471	3019971	AT3G09840	Chr3	3019339	3023052	NA	NA	NA	9.55835	6.01835	3016046	3016546	AT3G09830	NA	NA	NA	0.13585	0.231594	Chr3	3016493	3018983	+	2022	+	44	interaction93869	3425	11	0.070444	0.00116	1	0.070444	100	-0.451702	1919	42	-16.9653	1000	-6	-0.0817711	0.697657	0.880161	7.77e-08
8840532	8841032	AT4G15450	Chr4	8839413	8841276	NA	NA	Yes	6.99987	0.863617	8835571	8836071	AT4G15440	NA	NA	Yes	1.96052	2.56632	Chr4	8835494	8838676	+	51	+	1673	interaction136107	4961	11	0.070444	0.001372	1	0.070444	100	-0.451702	42	1603	-16.9653	1000	-6	0.0433209	0.917285	0.713754	0.0299135
25831504	25832004	AT1G68780	Chr1	25831802	25833844	NA	NA	NA	0.216473	0.272725	25827555	25828055	AT1G68750	Yes	NA	Yes	4.58319	2.81823	Chr1	25822941	25828107	+	304	+	1915	interaction48765	3949	22	0.070444	0	5	0.070444	500	-5.6413	205	1940	-16.9544	1700	-18	-0.384936	0.059702	1.81658	0.254496
18036001	18036501	AT4G38590	Chr4	18036091	18040928	NA	Yes	Yes	1.98081	1.67474	18034501	18035001	AT4G38580	NA	NA	Yes	0.140758	0.254304	Chr4	18034430	18035889	+	166	+	963	interaction154515	1500	36	0.070444	0	13	0.070444	1300	-23.9811	137	766	-16.9478	2300	-38	-1.09736	NA	0.0905301	0.823237
17995106	17995606	AT2G43300	Chr2	17995572	17995644	NA	NA	Yes	0.467394	0.668489	17990050	17990550	AT2G43280	NA	NA	Yes	0.319362	0.433131	Chr2	17989697	17991022	+	59	+	1270	interaction85308	5056	14	0.070444	1e-06	2	0.070444	200	-1.33096	42	1067	-16.923	1200	-10	NA	NA	0.129702	0.731068
12201691	12202191	AT4G23360	Chr4	12200268	12204792	Yes	NA	Yes	0.238065	0.246792	12199124	12199624	AT4G23350	Yes	NA	Yes	2.29576	1.09711	Chr4	12197312	12199200	+	326	+	265	interaction144122	2567	22	0.070444	0	5	0.070444	500	-5.6379	318	230	-16.8831	1700	-18	NA	NA	-0.250531	NA
17236430	17236930	AT3G46800	Chr3	17234493	17236542	NA	NA	Yes	0.678435	0.615492	17233991	17234491	AT3G46790	NA	NA	Yes	0.227423	0.32739	Chr3	17231772	17234002	+	564	+	323	interaction112888	2439	28	0.070444	0	8	0.070444	800	-11.5813	669	233	-16.8783	2000	-26	-0.810447	NA	-0.211461	0.380365
26803393	26803893	AT5G67180	Chr5	26801948	26804249	NA	Yes	Yes	3.09696	0.595168	26800993	26801493	AT5G67170	NA	NA	NA	0.111298	0.219114	Chr5	26799765	26802067	+	885	+	66	interaction198413	2400	28	0.070444	0	9	0.070444	900	-14.1446	723	67	-16.8667	1900	-28	-0.618596	0.00631521	-0.0878215	0.840089
19137920	19138420	AT3G51600	Chr3	19138393	19139252	NA	Yes	Yes	0.167119	0.331088	19136540	19137040	AT3G51590	NA	NA	Yes	0.839078	0.786513	Chr3	19135664	19136675	+	403	+	1383	interaction117094	1380	26	0.070444	0	7	0.070444	700	-9.46892	207	1229	-16.8502	1900	-24	0.185331	0.361568	1.21356	NA
20028406	20028906	AT1G53645	Chr1	20026146	20028635	NA	NA	Yes	5.17751	4.15457	20023882	20024382	AT1G53640	Yes	NA	Yes	5.47299	3.82799	Chr1	20020884	20025461	+	1957	+	102	interaction32578	4524	17	0.070444	0	3	0.070444	300	-2.53476	1870	91	-16.848	1400	-14	-0.190251	0.398188	0.717725	0.18976
20890493	20890993	AT5G51430	Chr5	20886837	20890907	NA	NA	Yes	2.48794	4.89169	20886013	20886513	AT5G51420	NA	NA	Yes	0.167237	0.264991	Chr5	20885418	20886726	+	1784	+	87	interaction187340	4480	23	0.070444	0	6	0.070444	600	-7.58112	1482	70	-16.8414	1700	-20	-0.20596	0.204316	2.53546	NA
19406491	19406991	AT2G47260	Chr2	19404819	19407084	NA	Yes	Yes	11.9151	25.0738	19402526	19403026	AT2G47250	NA	NA	Yes	0.29611	0.290054	Chr2	19399693	19403044	+	1540	+	139	interaction87872	3965	29	0.070444	0	9	0.070444	900	-13.9615	1399	111	-16.8272	2000	-28	-0.208929	0.713232	-0.0823011	0.728421
7006447	7006947	AT1G20220	Chr1	7004878	7007651	NA	NA	NA	0.142125	0.201033	7003892	7004392	AT1G20200	NA	NA	NA	0.164742	0.244122	Chr1	7001200	7004418	+	109	+	1120	interaction13296	2555	17	0.070444	0	3	0.070444	300	-2.53359	100	1075	-16.7562	1400	-14	-0.0763406	0.786578	-0.17989	0.308715
14151544	14152044	AT4G28670	Chr4	14151386	14153935	NA	NA	Yes	4.1787	2.8718	14149457	14149957	AT4G28660	NA	NA	Yes	0.249018	0.355518	Chr4	14149879	14151104	+	1270	+	134	interaction148320	2087	17	0.070444	0	3	0.070444	300	-2.53314	1167	104	-16.7209	1400	-12	0.38579	NA	-0.0924669	0.682124
6667988	6668488	AT5G19720	Chr5	6667663	6668587	Yes	NA	Yes	3.46973	2.42287	6665586	6666086	AT5G19710	Yes	NA	Yes	2.45066	0.417902	Chr5	6664744	6666107	+	922	+	319	interaction167953	2402	26	0.070444	0	7	0.070444	700	-9.4532	983	261	-16.6754	1900	-24	0.669091	NA	-1.55316	NA
19360025	19360525	AT3G52200	Chr3	19360205	19366387	NA	NA	Yes	7.06679	2.02345	19356523	19357023	AT3G52190	NA	NA	NA	0.125725	0.199	Chr3	19353971	19357074	+	173	+	1346	interaction117556	3502	29	0.070444	0	9	0.070444	900	-13.9411	120	1181	-16.6702	2000	-28	-0.176101	0.316926	0.179453	0.503234
3210500	3211000	AT5G10230	Chr5	3209539	3211423	Yes	NA	Yes	0.303519	0.276571	3207994	3208494	AT5G10220	Yes	NA	Yes	3.06207	2.82277	Chr5	3206867	3208825	+	1537	+	116	interaction162192	2506	36	0.070444	0	14	0.070444	1400	-27.158	1377	81	-16.6687	2200	-40	0.608296	0.00113729	NA	NA
18728979	18729479	AT3G50470	Chr3	18729053	18730269	Yes	NA	Yes	2.80731	3.35762	18727579	18728079	AT3G50460	Yes	NA	Yes	2.96751	1.59356	Chr3	18727839	18728649	+	1704	+	248	interaction116182	1400	58	0.070444	0	28	0.070444	2800	-71.0251	1492	172	-16.6381	3000	-74	1.55499	0.000988383	0.495604	0.801436
26095040	26095540	AT5G65300	Chr5	26095146	26095771	NA	Yes	Yes	0.395121	0.667982	26093894	26094394	AT5G65290	NA	Yes	NA	0.122736	0.212661	Chr5	26089555	26094548	+	396	+	77	interaction197355	1146	11	0.070444	0.0019	1	0.070444	100	-0.453961	299	62	-16.636	1000	-6	0.72013	0.124306	-0.0650962	0.862207
22612850	22613350	AT5G55870	Chr5	22612636	22613311	NA	NA	NA	6.36964	5.21789	22611980	22612480	AT5G55860	NA	NA	Yes	0.329305	0.354193	Chr5	22609531	22612393	+	374	+	156	interaction191425	870	17	0.070444	0	3	0.070444	300	-2.5318	290	118	-16.6174	1400	-12	NA	NA	0.135327	0.565603
3025923	3026423	AT3G09860	Chr3	3026054	3027234	NA	NA	NA	9.55835	6.01835	3019100	3019600	AT3G09840	NA	NA	NA	0.133766	0.228379	Chr3	3019339	3023052	+	83	+	784	interaction93917	6823	11	0.070444	0.001981	1	0.070444	100	-0.45418	65	620	-16.6052	1000	-6	0.0854093	0.714104	-0.0817711	0.697657
8034099	8034599	AT5G23830	Chr5	8033737	8034930	NA	NA	Yes	8.36706	8.67869	8031004	8031504	AT5G23820	NA	NA	Yes	0.392473	0.200217	Chr5	8031267	8033020	+	1811	+	187	interaction171107	3095	45	0.070444	0	19	0.070444	1900	-41.3112	2031	157	-16.5966	2600	-52	0.838758	7.64e-07	0.463274	0.00050182
5749520	5750020	AT5G17440	Chr5	5749761	5753643	Yes	NA	Yes	1.64366	1.38423	5745043	5745543	AT5G17430	Yes	NA	Yes	8.0617	8.24343	Chr5	5742541	5745568	+	673	+	1319	interaction165828	4477	22	0.070444	0	5	0.070444	500	-5.62332	486	1508	-16.5843	1700	-18	0.112043	0.68796	-0.00016273	0.999907
21117113	21117613	AT5G51990	Chr5	21117112	21117787	NA	NA	Yes	0.43705	0.926529	21111537	21112037	AT5G51970	NA	NA	NA	0.16896	0.234458	Chr5	21111444	21113403	+	763	+	110	interaction188181	5576	11	0.070444	0.002239	1	0.070444	100	-0.454379	859	68	-16.5773	1000	-6	2.11331	NA	0.352631	0.0211246
15489548	15490048	AT2G36895	Chr2	15489027	15490347	NA	NA	NA	0.124701	0.213805	15485525	15486025	AT2G36890	NA	NA	Yes	5.20713	3.83671	Chr2	15485778	15487277	+	2032	+	36	interaction79947	4023	10	0.070444	0.011442	1	0.070444	100	-0.433858	1984	12	-16.5725	900	-6	-0.140418	0.478074	0.270106	0.416366
23392057	23392557	AT1G63090	Chr1	23391062	23392851	NA	NA	Yes	0.291506	0.337383	23390452	23390952	AT1G63080	NA	NA	Yes	0.530441	0.858447	Chr1	23387630	23390816	+	112	+	1639	interaction41212	1605	27	0.070444	0	8	0.070444	800	-11.6981	105	1341	-16.5668	1900	-26	0.628486	3.8e-05	0.0526014	0.941579
12936999	12937499	AT1G35260	Chr1	12936848	12937787	Yes	NA	Yes	7.1993	3.47213	12936017	12936517	AT1G35255	Yes	NA	Yes	5.46939	2.31792	Chr1	12935646	12936553	+	744	+	737	interaction24824	982	47	0.070444	0	19	0.070444	1900	-40.5226	704	663	-16.565	2800	-54	0.403927	0.051764	0.238036	0.827471
10029104	10029604	AT4G18060	Chr4	10027479	10029899	NA	NA	NA	0.160458	0.230442	10021990	10022490	AT4G18050	Yes	NA	Yes	1.2565	0.846833	Chr4	10022204	10027415	+	853	+	95	interaction138489	7114	11	0.070444	0.002113	1	0.070444	100	-0.454561	691	71	-16.552	1000	-6	-0.129466	0.567278	-0.246996	0.382023
2324991	2325491	AT5G07350	Chr5	2320020	2325419	NA	NA	NA	0.342768	0.285203	2316894	2317394	AT5G07340	NA	Yes	Yes	0.205797	0.297494	Chr5	2317212	2319649	+	698	+	1611	interaction160363	8097	30	0.070444	0	9	0.070444	900	-13.7488	557	1129	-16.5444	2100	-28	-0.309476	0.0225477	-0.144572	0.502308
5909510	5910010	AT2G14050	Chr2	5909177	5913817	NA	NA	NA	0.11714	0.206055	5906930	5907430	AT2G14045	NA	NA	NA	0.122604	0.195354	Chr2	5906549	5908374	+	1641	+	71	interaction61156	2580	27	0.070444	0	9	0.070444	900	-14.3991	1731	44	-16.5412	1800	-26	0.0552335	0.917124	0.121497	0.600816
12959019	12959519	AT1G35320	Chr1	12959056	12962853	Yes	NA	Yes	1.99752	0.613418	12956537	12957037	AT1G35310	Yes	NA	Yes	5.34183	2.01076	Chr1	12956158	12957090	+	43	+	1579	interaction24991	2482	13	0.070444	5e-06	2	0.070444	200	-1.33164	13	1990	-16.54	1100	-8	0.276379	0.200866	0.388987	0.414922
5240528	5241028	AT1G15220	Chr1	5240028	5241538	NA	NA	NA	0.157454	0.229199	5237933	5238433	AT1G15215	NA	NA	NA	0.1226	0.203299	Chr1	5238064	5240051	+	97	+	630	interaction10544	2595	11	0.070444	0.002132	1	0.070444	100	-0.454781	75	487	-16.5215	1000	-6	0.0738657	0.895307	-0.159322	0.705346
18070468	18070968	AT2G43530	Chr2	18070055	18070718	NA	NA	Yes	0.236026	0.315137	18068966	18069466	AT2G43520	NA	NA	Yes	1.96337	2.19887	Chr2	18068424	18069168	+	782	+	1207	interaction85386	1502	47	0.070444	0	19	0.070444	1900	-40.5042	719	1117	-16.5192	2800	-54	2.13826	4.54e-44	0.653859	0.0611796
14274650	14275150	AT4G28940	Chr4	14274340	14277095	NA	NA	Yes	5.61706	2.76895	14271534	14272034	AT4G28930	Yes	NA	Yes	4.99938	1.82524	Chr4	14271071	14271652	+	345	+	86	interaction148810	3116	11	0.070444	0.002017	1	0.070444	100	-0.454833	236	76	-16.5144	1000	-6	0.528046	0.00241492	0.736963	0.611157
21779017	21779517	AT5G53610	Chr5	21779060	21779393	NA	NA	Yes	8.77526	11.4699	21774004	21774504	AT5G53592	Yes	NA	Yes	4.64726	2.55266	Chr5	21773687	21774927	+	138	+	816	interaction189286	5013	17	0.070444	0	3	0.070444	300	-2.53042	137	713	-16.5127	1400	-12	NA	NA	-0.814925	0.669072
19143816	19144316	AT3G51620	Chr3	19143651	19148242	NA	NA	NA	4.97279	3.65992	19138528	19139028	AT3G51600	NA	Yes	Yes	1.73722	3.31711	Chr3	19138393	19139252	+	83	+	1223	interaction117176	5288	11	0.070444	0.001981	1	0.070444	100	-0.454883	77	1114	-16.5075	1000	-6	-0.0200309	0.95515	0.185331	0.361568
12717590	12718090	AT4G24640	Chr4	12717787	12719017	NA	NA	Yes	7.68061	6.60584	12714444	12714944	AT4G24630	NA	NA	Yes	0.371661	0.34473	Chr4	12714623	12717111	+	1048	+	219	interaction145774	3146	11	0.070444	0.002675	1	0.070444	100	-0.454883	1051	77	-16.5075	1000	-6	NA	NA	0.210283	0.298477
22692060	22692560	AT3G61310	Chr3	22690595	22692834	NA	NA	NA	4.2586	4.69083	22680991	22681491	AT3G61280	NA	NA	Yes	2.74763	2.56068	Chr3	22680959	22683769	+	81	+	912	interaction124088	11069	11	0.070444	0.001955	1	0.070444	100	-0.454931	78	852	-16.5008	1000	-6	0.222852	0.231884	0.680356	0.319649
10841023	10841523	AT4G20006	Chr4	10840973	10841096	NA	NA	Yes	0.165745	0.215644	10831582	10832082	AT4G19985	NA	NA	Yes	0.286965	0.29073	Chr4	10830236	10832094	+	112	+	1345	interaction140465	9441	11	0.070444	0.002253	1	0.070444	100	-0.455071	81	1399	-16.4816	1000	-6	NA	NA	-0.237458	0.38186
5745052	5745552	AT5G17430	Chr5	5742541	5745568	Yes	NA	Yes	6.16115	2.85487	5730504	5731004	AT5G17410	NA	NA	NA	0.157056	0.243436	Chr5	5730609	5736695	+	1319	+	91	interaction165761	14548	11	0.070444	0.002073	1	0.070444	100	-0.455071	1508	81	-16.4816	1000	-6	-0.00016273	0.999907	-0.125364	0.651828
1171990	1172490	AT2G03830	Chr2	1171135	1172363	Yes	NA	Yes	0.118979	0.202257	1166495	1166995	AT2G03820	NA	NA	Yes	0.224803	0.271262	Chr2	1164956	1167029	+	527	+	93	interaction60044	5495	11	0.070444	0.002094	1	0.070444	100	-0.455115	488	82	-16.4756	1000	-6	-0.00263086	0.999104	0.0177968	0.957303
7232416	7232916	AT3G20690	Chr3	7231569	7232682	Yes	NA	Yes	4.10001	1.567	7227931	7228431	AT3G20660	NA	NA	NA	0.400827	0.44918	Chr3	7225134	7228595	+	1169	+	99	interaction100418	4485	11	0.070444	0.00215	1	0.070444	100	-0.455241	987	85	-16.4584	1000	-6	NA	NA	0.839267	0.00537367
16840973	16841473	AT5G42140	Chr5	16837339	16841640	NA	NA	NA	7.04404	4.22166	16836597	16837097	AT5G42130	NA	NA	Yes	0.211017	0.378421	Chr5	16835298	16836839	+	75	+	614	interaction180754	4376	11	0.070444	0.00187	1	0.070444	100	-0.455358	88	525	-16.4424	1000	-6	-0.2963	0.188452	-0.057416	0.841833
11205062	11205562	AT2G26320	Chr2	11205388	11206287	NA	NA	Yes	2.85175	2.9185	11201123	11201623	AT2G26310	NA	NA	Yes	0.376485	0.505335	Chr2	11201302	11204153	+	124	+	926	interaction69571	3939	11	0.070444	0.00233	1	0.070444	100	-0.455432	90	806	-16.4323	1000	-6	NA	NA	-0.113766	0.886963
16892196	16892696	AT1G44750	Chr1	16892638	16895465	NA	NA	Yes	1.45423	0.902944	16888397	16888897	AT1G44740	NA	NA	Yes	2.70585	3.34728	Chr1	16887403	16889155	+	1265	+	103	interaction25664	3799	21	0.070444	0	5	0.070444	500	-5.69205	1089	79	-16.4288	1600	-18	-0.109044	0.74613	0.207716	0.799287
20365146	20365646	AT5G50070	Chr5	20364555	20365429	Yes	NA	Yes	0.353976	0.467884	20352007	20352507	AT5G50020	NA	NA	Yes	0.441697	0.352773	Chr5	20351159	20354436	+	1468	+	76	interaction186783	13139	11	0.070444	0.001886	1	0.070444	100	-0.455571	1359	94	-16.4136	1000	-6	-2.5676	NA	-0.0279091	0.936444
18488115	18488615	AT1G49940	Chr1	18488359	18491179	NA	NA	Yes	6.1895	2.49629	18487400	18487900	AT1G49938	NA	NA	Yes	1.69447	1.76224	Chr1	18487544	18488107	+	1364	+	1925	interaction28505	715	65	0.135791	0	38	0.164308	1629.17	-104.33	1730	1988	-16.4066	1742.8	-82	0.217788	0.78056	-0.292361	0.911847
5283960	5284460	AT1G15360	Chr1	5283537	5284673	NA	Yes	Yes	10.943	19.7308	5279065	5279565	AT1G15350	NA	Yes	Yes	0.175667	0.332935	Chr1	5278259	5279877	+	701	+	96	interaction10643	4895	11	0.070444	0.002123	1	0.070444	100	-0.455698	734	98	-16.3964	1000	-6	2.51673	NA	0.36227	0.0323754
28712461	28712961	AT1G76510	Chr1	28708613	28712952	NA	NA	NA	3.33594	1.77552	28705488	28705988	AT1G76500	NA	NA	Yes	13.9343	19.1926	Chr1	28705526	28706562	+	400	+	96	interaction55188	6973	11	0.070444	0.002123	1	0.070444	100	-0.455698	426	98	-16.3964	1000	-6	0.0677574	0.844547	0.211265	0.692699
9178415	9178915	AT1G26560	Chr1	9178377	9181835	NA	NA	Yes	0.683886	0.665572	9177458	9177958	AT1G26558	NA	NA	NA	0.264174	0.171467	Chr1	9175610	9177598	+	680	+	71	interaction17733	957	24	0.070444	0	7	0.070444	700	-9.68786	675	55	-16.3938	1700	-22	0.0354015	0.913762	0.0700895	0.984026
3561091	3561591	AT3G11370	Chr3	3561098	3562880	NA	Yes	Yes	0.0752388	0.203353	3554445	3554945	AT3G11330	NA	Yes	NA	0.228578	0.37429	Chr3	3551973	3554763	+	1802	+	125	interaction95276	6646	11	0.070444	0.002336	1	0.070444	100	-0.455786	2092	101	-16.3845	1000	-6	0.38048	0.765406	-0.00112031	0.998054
12253920	12254420	AT4G23490	Chr4	12251430	12254270	NA	NA	NA	0.124615	0.240294	12242615	12243115	AT4G23450	NA	NA	Yes	0.313529	0.252716	Chr4	12240802	12242706	+	121	+	2016	interaction144507	11305	11	0.070444	0.002312	1	0.070444	100	-0.455815	102	1595	-16.3807	1000	-6	-0.499519	0.0180775	0.386979	0.399378
7649004	7649504	AT3G21710	Chr3	7648341	7649799	Yes	NA	Yes	1.20705	0.589759	7645049	7645549	AT3G21700	Yes	NA	Yes	0.882516	0.272893	Chr3	7644349	7646383	+	545	+	1330	interaction101562	3955	24	0.070444	0	6	0.070444	600	-7.4477	535	1293	-16.3774	1800	-22	0.306475	0.120244	-0.239682	0.37043
9761496	9761996	AT3G26590	Chr3	9761699	9765315	NA	NA	Yes	0.437592	0.473343	9759440	9759940	AT3G26580	NA	NA	NA	0.236439	0.290889	Chr3	9758886	9760544	+	126	+	516	interaction107025	2056	11	0.070444	0.002342	1	0.070444	100	-0.45587	104	450	-16.3733	1000	-6	-0.0663182	0.814059	0.385203	0.00725567
19423418	19423918	AT1G52160	Chr1	19420714	19424439	NA	NA	NA	3.97675	2.2789	19413556	19414056	AT1G52150	NA	NA	Yes	0.780766	0.678737	Chr1	19409710	19414678	+	1281	+	89	interaction31226	9862	11	0.070444	0.002051	1	0.070444	100	-0.455923	1316	106	-16.3661	1000	-6	0.130081	0.739527	-0.25828	0.180828
20433498	20433998	AT1G54760	Chr1	20433911	20434397	NA	NA	NA	0.180676	0.218328	20424487	20424987	AT1G54730	NA	NA	NA	0.410716	0.18194	Chr1	20424409	20430123	+	94	+	1178	interaction33906	9011	11	0.070444	0.002103	1	0.070444	100	-0.455923	106	1046	-16.3661	1000	-6	-2.76297	NA	0.220843	0.27791
19986051	19986551	AT3G53970	Chr3	19985138	19987339	NA	NA	NA	0.131523	0.213364	19980053	19980553	AT3G53960	NA	NA	Yes	0.8603	0.762799	Chr3	19978121	19980959	+	103	+	1260	interaction118910	5998	11	0.070444	0.002184	1	0.070444	100	-0.455974	108	896	-16.3593	1000	-6	0.0930352	0.717166	0.8467	0.000862281
17135976	17136476	AT3G46550	Chr3	17136455	17137874	NA	NA	NA	12.1904	4.70904	17128333	17128833	AT3G46520	NA	NA	Yes	0.411542	0.646197	Chr3	17128262	17130210	+	208	+	1682	interaction112587	7643	11	0.070444	0.002649	1	0.070444	100	-0.455999	109	1713	-16.356	1000	-6	-0.348392	0.119727	-0.656257	0.569316
20424464	20424964	AT1G54730	Chr1	20424409	20430123	NA	NA	NA	0.334116	0.31316	20420045	20420545	AT1G54710	NA	NA	NA	0.202266	0.262674	Chr1	20416769	20421035	+	1178	+	192	interaction33809	4419	17	0.070444	0	3	0.070444	300	-2.52821	1046	185	-16.3479	1400	-12	0.220843	0.27791	-0.248872	0.175059
20532121	20532621	AT3G55380	Chr3	20531406	20533173	NA	NA	Yes	0.165808	0.262455	20521518	20522018	AT3G55360	NA	NA	Yes	0.256507	0.30402	Chr3	20520929	20523014	+	1159	+	127	interaction119796	10603	11	0.070444	0.002348	1	0.070444	100	-0.456203	1146	118	-16.3287	1000	-6	0.0622888	0.873571	-0.299188	0.0213613
7663552	7664052	AT3G21740	Chr3	7662360	7664010	NA	NA	Yes	9.92189	4.93156	7660899	7661399	AT3G21730	Yes	NA	Yes	4.37718	0.69272	Chr3	7659555	7661232	+	1043	+	757	interaction101707	2653	37	0.070444	0	13	0.070444	1300	-23.5711	722	792	-16.3245	2400	-38	0.227942	0.537341	NA	NA
23230096	23230596	AT5G57345	Chr5	23229406	23230638	NA	NA	NA	3.3011	6.67353	23218470	23218970	AT5G57330	NA	NA	NA	0.144905	0.219201	Chr5	23218213	23221089	+	1064	+	74	interaction192687	11626	21	0.070444	0	5	0.070444	500	-5.68706	932	84	-16.324	1600	-18	0.00613031	0.985916	-0.0284381	0.924744
28338033	28338533	AT1G75500	Chr1	28337725	28340275	NA	NA	Yes	5.15756	3.97105	28335920	28336420	AT1G75490	NA	Yes	Yes	2.74374	8.15364	Chr1	28335501	28336706	+	206	+	1043	interaction54430	2113	11	0.070444	0.002644	1	0.070444	100	-0.456466	132	879	-16.2939	1000	-6	-0.199789	0.21133	1.21851	0.00217413
19270038	19270538	AT2G46900	Chr2	19269557	19272195	NA	NA	NA	10.0455	20.7367	19266038	19266538	AT2G46880	Yes	NA	Yes	5.17652	2.86497	Chr2	19264572	19266446	+	116	+	1023	interaction87694	4000	11	0.070444	0.00228	1	0.070444	100	-0.456499	134	977	-16.2895	1000	-6	0.126129	0.577164	-3.21817	0.0517219
21039626	21040126	AT3G56820	Chr3	21039802	21041760	NA	NA	NA	0.548694	0.455687	21037548	21038048	AT3G56810	NA	Yes	Yes	3.13499	5.3234	Chr3	21036759	21038947	+	570	+	143	interaction120647	2078	11	0.070444	0.00243	1	0.070444	100	-0.456515	512	135	-16.2874	1000	-6	0.299334	0.285159	-0.440444	0.0859887
7525550	7526050	AT3G21370	Chr3	7524053	7527652	Yes	NA	Yes	0.420497	0.397893	7523042	7523542	AT3G21360	Yes	NA	Yes	1.95183	0.550043	Chr3	7522803	7524580	+	81	+	2031	interaction101027	2508	18	0.070444	0	4	0.070444	400	-4.07449	31	1922	-16.2852	1400	-14	2.1566	1.63e-21	0.290527	0.237437
21605893	21606393	AT3G58410	Chr3	21604870	21606229	Yes	NA	Yes	0.140264	0.228435	21594531	21595031	AT3G58360	Yes	NA	Yes	6.00912	1.81612	Chr3	21593504	21594866	+	124	+	1267	interaction121884	11362	11	0.070444	0.00233	1	0.070444	100	-0.456562	138	1054	-16.2812	1000	-6	NA	NA	0.920804	NA
17273098	17273598	AT4G36630	Chr4	17271818	17276616	NA	NA	Yes	0.182875	0.18805	17263540	17264040	AT4G36600	NA	NA	Yes	3.21168	3.37754	Chr4	17263665	17265100	+	114	+	1054	interaction152973	9558	11	0.070444	0.002267	1	0.070444	100	-0.456593	140	995	-16.2772	1000	-6	-0.106781	0.660315	1.94128	9.86e-24
28131949	28132449	AT1G74890	Chr1	28131589	28132710	NA	NA	Yes	1.58976	1.37852	28130991	28131491	AT1G74880	NA	NA	NA	0.175704	0.269479	Chr1	28129857	28131077	+	1175	+	625	interaction53816	958	70	0.070444	0	35	0.070444	3500	-94.097	1075	580	-16.2705	3500	-92	-0.622608	0.395605	0.0464623	0.874604
13261572	13262072	AT4G26180	Chr4	13260060	13262035	NA	NA	NA	10.6481	10.4593	13255453	13255953	AT4G26160	Yes	NA	Yes	0.206062	0.295212	Chr4	13255250	13256760	+	179	+	476	interaction146794	6119	11	0.070444	0.002569	1	0.070444	100	-0.456665	145	375	-16.2677	1000	-6	0.220063	0.571778	-0.0422591	0.927037
29742004	29742504	AT1G79060	Chr1	29741747	29743600	NA	NA	NA	1.96052	2.56632	29735984	29736484	AT1G79040	NA	NA	NA	0.224849	0.404933	Chr1	29736015	29737009	+	690	+	180	interaction57544	6020	11	0.070444	0.002572	1	0.070444	100	-0.45677	682	153	-16.2539	1000	-6	-0.149371	0.643556	0.159851	0.27877
13679580	13680080	AT4G27320	Chr4	13678463	13680924	NA	NA	Yes	0.149728	0.279806	13671434	13671934	AT4G27300	NA	NA	Yes	0.826435	0.978511	Chr4	13669307	13672348	+	100	+	1801	interaction147556	8146	19	0.070444	0	4	0.070444	400	-3.9975	98	1881	-16.2448	1500	-16	0.252328	0.196609	0.389774	0.014193
17635458	17635958	AT4G37530	Chr4	17634783	17636288	NA	NA	Yes	7.11636	7.83197	17628917	17629417	AT4G37510	NA	NA	Yes	0.227381	0.314076	Chr4	17626103	17628947	+	1446	+	211	interaction153632	6541	32	0.070444	0	11	0.070444	1100	-18.8079	1351	120	-16.2434	2100	-32	0.484004	0.0274384	-0.0879675	0.785534
9626586	9627086	AT2G22650	Chr2	9624585	9626969	NA	NA	NA	0.80724	0.622277	9623178	9623678	AT2G22640	Yes	NA	Yes	0.334116	0.31316	Chr2	9623067	9624218	+	111	+	1356	interaction66970	3408	37	0.070444	0	15	0.070444	1500	-30.1342	76	1157	-16.2414	2200	-42	0.0199205	0.967649	0.304239	0.185254
6236970	6237470	AT4G09960	Chr4	6236374	6240932	Yes	NA	Yes	0.596937	0.748836	6223430	6223930	AT4G09900	NA	NA	Yes	0.422909	0.357954	Chr4	6221663	6224134	+	148	+	1741	interaction130346	13540	11	0.070444	0.002453	1	0.070444	100	-0.45693	167	1515	-16.2329	1000	-6	3.96119	0.0475743	-0.173766	0.451319
7038993	7039493	AT1G20330	Chr1	7038687	7040159	NA	NA	NA	0.1288	0.315339	7032922	7033422	AT1G20310	NA	Yes	Yes	2.14381	3.26437	Chr1	7032289	7033208	+	196	+	1176	interaction13379	6071	11	0.070444	0.002618	1	0.070444	100	-0.456951	169	1009	-16.2302	1000	-6	0.447904	0.00691149	0.771267	0.665704
17865405	17865905	AT5G44350	Chr5	17864519	17865707	Yes	NA	Yes	0.129464	0.212617	17860463	17860963	AT5G44340	NA	Yes	NA	0.282403	0.359669	Chr5	17859194	17861101	+	975	+	187	interaction182234	4942	11	0.070444	0.002593	1	0.070444	100	-0.456971	891	171	-16.2276	1000	-6	0.197864	0.76299	-0.0907125	0.720477
1554427	1554927	AT1G05320	Chr1	1553602	1557733	NA	NA	Yes	0.648681	0.299057	1551603	1552103	AT1G05310	NA	NA	Yes	8.72114	9.24082	Chr1	1550542	1552517	+	1329	+	37	interaction3160	2824	10	0.070444	0.011838	1	0.070444	100	-0.438915	1386	15	-16.2249	900	-6	0.150783	0.48819	0.218718	0.770828
19067911	19068411	AT1G51430	Chr1	19068240	19069776	NA	NA	NA	4.39285	1.20647	19066355	19066855	AT1G51420	NA	NA	Yes	0.326006	0.488175	Chr1	19064767	19066704	+	189	+	335	interaction29940	1556	11	0.070444	0.002599	1	0.070444	100	-0.457	174	282	-16.2238	1000	-6	-0.242722	0.439463	-0.663326	0.00623516
3225513	3226013	AT1G09920	Chr1	3224683	3227070	NA	NA	Yes	0.190756	0.270679	3224029	3224529	AT1G09910	NA	NA	NA	0.139816	0.193409	Chr1	3220034	3224541	+	164	+	1406	interaction5943	1484	41	0.070444	0	17	0.070444	1700	-35.5165	119	1372	-16.2214	2400	-46	0.101316	0.691765	-0.0847099	0.814921
1028067	1028567	AT2G03380	Chr2	1028291	1030361	NA	NA	NA	0.4953	0.733314	1025502	1026002	AT2G03370	NA	Yes	Yes	1.04186	1.28891	Chr2	1024709	1027045	+	944	+	147	interaction59625	2565	19	0.070444	0	4	0.070444	400	-3.99648	652	101	-16.2111	1500	-16	-0.170436	0.866051	0.0163137	0.990541
21585393	21585893	AT3G58320	Chr3	21585566	21586328	Yes	NA	Yes	5.12895	3.46284	21582966	21583466	AT3G58300	Yes	NA	Yes	1.42811	0.62675	Chr3	21582763	21583390	+	769	+	340	interaction121504	2427	17	0.070444	0	3	0.070444	300	-2.52633	997	264	-16.2109	1400	-12	1.71817	NA	-1.60131	NA
19335901	19336401	AT1G52000	Chr1	19333158	19336115	NA	NA	Yes	4.80076	2.44809	19332433	19332933	AT1G51990	Yes	NA	Yes	2.07922	0.660429	Chr1	19330948	19332667	+	358	+	210	interaction30974	3468	11	0.070444	0.002654	1	0.070444	100	-0.457133	283	189	-16.2064	1000	-6	0.321571	0.0170944	NA	NA
23276000	23276500	AT3G62980	Chr3	23273115	23276375	NA	NA	NA	0.149443	0.227973	23270634	23271134	AT3G62970	NA	NA	Yes	0.179087	0.258783	Chr3	23270632	23272923	+	190	+	439	interaction124910	5366	11	0.070444	0.002601	1	0.070444	100	-0.457181	195	250	-16.2003	1000	-6	-0.331873	0.00913301	0.18375	0.446387
9583573	9584073	AT2G22540	Chr2	9579873	9583893	NA	Yes	Yes	0.720615	0.43911	9577091	9577591	AT2G22530	Yes	NA	Yes	0.408263	0.27535	Chr2	9572795	9577441	+	145	+	1022	interaction66910	6482	23	0.070444	0	6	0.070444	600	-7.53864	96	1086	-16.1999	1700	-20	-0.346226	0.0577123	-0.306681	0.163401
16922908	16923408	AT2G40520	Chr2	16922586	16925914	NA	NA	Yes	4.00672	1.43678	16919560	16920060	AT2G40510	NA	Yes	Yes	0.23932	0.292887	Chr2	16918432	16919888	+	1351	+	108	interaction82424	3348	19	0.070444	0	4	0.070444	400	-3.99584	1376	103	-16.1899	1500	-16	0.19945	0.516728	-0.0153417	0.9608
27989419	27989919	AT1G74460	Chr1	27987960	27989801	NA	NA	Yes	2.07549	1.42005	27987008	27987508	AT1G74458	NA	NA	Yes	0.10264	0.198429	Chr1	27986956	27987675	+	530	+	261	interaction53506	2411	17	0.070444	0	3	0.070444	300	-2.52604	449	283	-16.1896	1400	-12	-0.0477781	0.886092	0.557495	0.071949
11915036	11915536	AT3G30280	Chr3	11914365	11915697	Yes	NA	Yes	8.58705	5.60031	11912511	11913011	AT3G30260	Yes	NA	Yes	4.75596	0.862274	Chr3	11909118	11912880	+	877	+	103	interaction109436	2525	14	0.070444	1e-06	2	0.070444	200	-1.33091	1053	76	-16.1809	1200	-10	NA	NA	2.11962	0.243933
1073038	1073538	AT1G04130	Chr1	1073426	1075568	NA	NA	NA	0.138816	0.240703	1070427	1070927	AT1G04120	NA	Yes	Yes	0.145836	0.243476	Chr1	1064449	1071047	+	106	+	1516	interaction2469	2611	26	0.070444	0	8	0.070444	800	-11.8128	69	1337	-16.1727	1800	-24	-0.0667946	0.867013	-0.337872	0.0469678
25511012	25511512	AT5G63740	Chr5	25510775	25511456	Yes	NA	Yes	6.39943	1.74154	25509398	25509898	AT5G63730	NA	NA	Yes	0.427252	0.518434	Chr5	25508099	25509706	+	1006	+	115	interaction196483	1614	26	0.070444	0	8	0.070444	800	-11.8128	1106	69	-16.1727	1800	-24	-2.19033	NA	-3.56761	NA
16204480	16204980	AT4G33790	Chr4	16204156	16207947	Yes	NA	Yes	0.126787	0.179165	16203588	16204088	AT4G33780	NA	NA	Yes	0.580853	0.313486	Chr4	16201830	16203641	+	193	+	1297	interaction150646	892	43	0.070444	0	18	0.070444	1800	-38.3064	148	1322	-16.166	2500	-50	0.600921	0.100716	0.106648	0.704505
6716058	6716558	AT5G19870	Chr5	6716072	6717110	NA	NA	Yes	0.161436	0.216921	6714984	6715484	AT5G19860	NA	NA	NA	0.217681	0.317385	Chr5	6714263	6715875	+	892	+	639	interaction168002	1074	35	0.070444	0	12	0.070444	1200	-21.0175	703	509	-16.1633	2300	-36	-0.190077	0.82616	0.21424	0.295636
16594502	16595002	AT4G34790	Chr4	16594468	16595153	Yes	NA	Yes	8.47557	1.31903	16592450	16592950	AT4G34780	Yes	NA	Yes	6.07139	0.993117	Chr4	16592396	16592717	+	961	+	459	interaction151312	2052	11	0.070444	0.002945	1	0.070444	100	-0.457877	883	365	-16.1107	1000	-6	0.538601	0.533714	-1.60131	NA
24728069	24728569	AT1G66320	Chr1	24726811	24728614	Yes	NA	Yes	3.77304	3.88528	24724063	24724563	AT1G66310	Yes	NA	Yes	9.71961	5.07279	Chr1	24722970	24724475	+	1122	+	1659	interaction45815	4006	50	0.096264	0	31	0.13776	1585.18	-79.376	1391	2073	-16.1076	2073.67	-58	4.61175	NA	1.61886	NA
27785579	27786079	AT1G73880	Chr1	27784980	27786804	NA	NA	NA	9.06909	11.3086	27781038	27781538	AT1G73875	NA	NA	NA	0.144992	0.269653	Chr1	27781005	27784920	+	267	+	1205	interaction53129	4541	48	0.070444	0	21	0.070444	2100	-47.3236	200	1238	-16.1039	2700	-56	0.232784	0.635386	-0.18041	0.611157
15937508	15938008	AT5G39810	Chr5	15937277	15938344	NA	NA	Yes	2.25272	4.36461	15906888	15907388	AT5G39750	NA	NA	Yes	0.117564	0.159331	Chr5	15906874	15907942	+	553	+	985	interaction178683	30620	11	0.070444	0.002987	1	0.070444	100	-0.45816	565	992	-16.0748	1000	-6	-0.835647	NA	0.163957	NA
7239411	7239911	AT3G20720	Chr3	7239907	7247005	NA	Yes	NA	0.130736	0.195151	7232438	7232938	AT3G20690	Yes	NA	Yes	2.68194	0.987244	Chr3	7231569	7232682	+	601	+	1169	interaction100466	6973	17	0.070444	0	3	0.070444	300	-2.52431	491	987	-16.0661	1400	-12	-0.104969	0.732731	NA	NA
8410036	8410536	AT1G23790	Chr1	8409962	8412041	NA	NA	NA	0.196021	0.303414	8400039	8400539	AT1G23750	NA	NA	Yes	0.555913	0.572278	Chr1	8400150	8401487	+	690	+	1231	interaction16297	9997	11	0.070444	0.003028	1	0.070444	100	-0.458292	760	1017	-16.058	1000	-6	-0.138859	0.837134	-0.0527608	0.899259
26965955	26966455	AT5G67620	Chr5	26964769	26965996	NA	Yes	Yes	3.4367	6.84879	26950095	26950595	AT5G67560	NA	NA	NA	0.140788	0.210573	Chr5	26950308	26952211	+	770	+	1410	interaction198721	15860	11	0.070444	0.003045	1	0.070444	100	-0.458293	761	1101	-16.058	1000	-6	0.60218	0.0652022	0.172978	0.353217
396502	397002	AT3G02170	Chr3	396011	399779	NA	NA	NA	5.55179	4.7395	394406	394906	AT3G02160	NA	Yes	NA	0.13286	0.230706	Chr3	394069	395984	+	172	+	1221	interaction89801	2096	43	0.070444	0	18	0.070444	1800	-38.2671	154	1169	-16.0572	2500	-50	0.43673	0.160434	-0.0425254	0.949166
19017979	19018479	AT5G46871	Chr5	19018100	19018443	Yes	NA	Yes	4.21482	5.21652	19015564	19016064	AT5G46870	NA	NA	NA	0.363598	0.264853	Chr5	19015232	19017063	+	207	+	1219	interaction185080	2415	14	0.070444	1e-06	2	0.070444	200	-1.33091	92	1282	-16.0342	1200	-10	2.09563	0.00556446	0.00590339	0.993538
24032476	24032976	AT1G64670	Chr1	24030819	24033556	NA	Yes	Yes	0.188813	0.276701	24028548	24029048	AT1G64660	NA	Yes	Yes	1.7804	3.70055	Chr1	24028917	24030780	+	750	+	676	interaction42883	3928	17	0.070444	0	3	0.070444	300	-2.52361	794	701	-16.0165	1400	-12	-0.669174	4.13e-06	0.449265	0.0792767
6547036	6547536	AT3G18980	Chr3	6546462	6548062	NA	NA	Yes	5.28784	4.02086	6544946	6545446	AT3G18970	NA	NA	NA	0.112127	0.222857	Chr3	6543317	6545432	+	1920	+	58	interaction99494	2090	10	0.070444	0.017925	1	0.070444	100	-0.440172	1983	16	-16.0129	900	-6	0.104566	0.730418	-0.00284837	0.997201
2674983	2675483	AT4G05190	Chr4	2675100	2680214	NA	NA	NA	0.184945	0.343966	2673074	2673574	AT4G05180	NA	NA	Yes	0.573638	0.688603	Chr4	2671821	2673243	+	116	+	1167	interaction129247	1909	26	0.070444	0	8	0.070444	800	-11.7942	73	887	-16.0025	1800	-24	-0.374391	0.143946	-0.183953	0.280841
6488477	6488977	AT5G19280	Chr5	6488318	6493439	NA	NA	Yes	5.39326	3.73264	6486370	6486870	AT5G19270	Yes	NA	Yes	6.36964	5.21789	Chr5	6485616	6487009	+	118	+	1134	interaction167647	2107	28	0.070444	0	9	0.070444	900	-14.0334	88	931	-15.9965	1900	-28	0.0818442	0.774296	NA	NA
26447518	26448018	AT1G70220	Chr1	26446135	26448009	NA	NA	Yes	3.48774	1.54154	26430021	26430521	AT1G70185	NA	NA	NA	0.072641	0.074787	Chr1	26429732	26430069	+	1837	+	133	interaction50402	17497	23	0.070444	0	6	0.070444	600	-7.52428	1868	110	-15.9949	1700	-20	0.00815811	NA	-0.889509	NA
2783482	2783982	AT5G08590	Chr5	2783330	2786094	NA	NA	Yes	1.00518	0.596829	2782533	2783033	AT5G08580	NA	NA	NA	0.113586	0.237587	Chr5	2780511	2783066	+	1629	+	171	interaction161179	949	56	0.070444	0	28	0.070444	2800	-71.6251	1219	137	-15.9559	2800	-72	-0.0488677	0.864289	-0.302598	0.177839
124438	124938	AT3G01330	Chr3	124378	126835	NA	NA	NA	15.0436	25.674	116917	117417	AT3G01328	NA	NA	Yes	1.97538	0.493229	Chr3	117253	117568	+	132	+	1179	interaction88737	7521	19	0.070444	0	4	0.070444	400	-3.98818	135	1258	-15.9416	1500	-16	-0.0233515	0.97489	NA	NA
22794017	22794517	AT1G61730	Chr1	22793218	22794703	NA	NA	NA	0.750082	0.754622	22787046	22787546	AT1G61700	Yes	NA	Yes	3.07449	1.24891	Chr1	22787011	22788333	+	269	+	1256	interaction39950	6971	29	0.070444	0	9	0.070444	900	-13.8405	202	1234	-15.9377	2000	-28	0.0638444	0.835873	2.94581	NA
231051	231551	AT1G01640	Chr1	230993	232508	NA	NA	Yes	0.399791	0.385967	225390	225890	AT1G01620	NA	NA	NA	0.183201	0.331719	Chr1	225664	227302	+	117	+	1327	interaction526	5661	14	0.070444	1e-06	2	0.070444	200	-1.3309	108	1250	-15.9334	1200	-10	0.267022	0.568039	0.522763	0.0195096
17992945	17993445	AT1G48650	Chr1	17989397	17995326	NA	Yes	Yes	1.22258	0.628454	17987418	17987918	AT1G48640	NA	NA	Yes	1.08206	1.07465	Chr1	17986357	17988991	+	75	+	718	interaction27484	5527	14	0.070444	1e-06	2	0.070444	200	-1.3309	108	874	-15.9334	1200	-10	-0.165856	0.482076	-0.197824	0.864289
19905497	19905997	AT3G53720	Chr3	19905677	19910112	NA	Yes	Yes	4.11536	6.53528	19900991	19901491	AT3G53700	NA	Yes	Yes	0.177267	0.300772	Chr3	19900279	19902884	+	120	+	1853	interaction118615	4506	28	0.070444	0	9	0.070444	900	-14.0219	91	1654	-15.9117	1900	-28	0.0703504	0.876519	-0.0621243	0.856288
760627	761127	AT4G01760	Chr4	759130	761134	NA	NA	Yes	6.48341	6.32191	753463	753963	AT4G01740	NA	NA	NA	0.645278	0.618626	Chr4	753421	755456	+	1241	+	136	interaction126580	7164	21	0.070444	0	5	0.070444	500	-5.66408	1547	119	-15.8601	1600	-18	-0.632039	0.80933	0.133441	0.813286
652064	652564	AT5G02850	Chr5	652109	653673	NA	NA	NA	4.58574	1.96412	648513	649013	AT5G02840	NA	NA	NA	0.116314	0.240875	Chr5	648703	651972	+	159	+	1489	interaction156755	3551	36	0.070444	0	14	0.070444	1400	-26.9086	105	1325	-15.8528	2200	-38	-0.156676	0.611976	0.293895	0.15832
17573592	17574092	AT4G37380	Chr4	17572039	17573938	NA	Yes	Yes	0.214128	0.220099	17571023	17571523	AT4G37370	NA	NA	Yes	0.203615	0.341886	Chr4	17569827	17571704	+	985	+	275	interaction153485	2569	29	0.070444	0	9	0.070444	900	-13.8274	780	222	-15.8473	2000	-28	-0.081835	0.859298	0.434756	0.278009
28439643	28440143	AT1G75730	Chr1	28435705	28439769	NA	NA	Yes	0.991257	0.58777	28430485	28430985	AT1G75710	NA	Yes	Yes	4.14905	5.97263	Chr1	28428705	28431249	+	1376	+	168	interaction54701	9158	14	0.070444	1e-06	2	0.070444	200	-1.3309	1053	135	-15.8198	1200	-10	0.441515	0.015212	-0.360558	0.0219863
1611498	1611998	AT4G03635	Chr4	1611751	1612756	NA	NA	NA	0.194418	0.282304	1603948	1604448	AT4G03600	Yes	NA	Yes	0.256533	0.22213	Chr4	1603701	1604508	+	275	+	971	interaction128258	7550	14	0.070444	2e-06	2	0.070444	200	-1.3309	144	894	-15.7918	1200	-10	0.0988715	0.864233	0.685962	0.303655
22777925	22778425	AT3G61560	Chr3	22777828	22780191	NA	Yes	Yes	18.8553	37.6202	22776568	22777068	AT3G61550	NA	Yes	Yes	1.7959	4.32206	Chr3	22776400	22777225	+	90	+	670	interaction124293	1357	16	0.070444	0	3	0.070444	300	-2.54558	50	610	-15.7762	1300	-12	-0.0310134	0.941366	-0.240743	0.31058
15974487	15974987	AT5G39890	Chr5	15974392	15976270	Yes	NA	Yes	6.54122	4.54417	15966900	15967400	AT5G39865	NA	NA	Yes	0.330737	0.376818	Chr5	15965460	15967173	+	978	+	176	interaction178846	7587	14	0.070444	1e-06	2	0.070444	200	-1.3309	782	151	-15.7724	1200	-10	-0.120243	0.903065	-0.511057	0.424226
5135949	5136449	AT3G15250	Chr3	5136261	5137195	NA	Yes	Yes	7.5603	1.97231	5134003	5134503	AT3G15240	NA	Yes	Yes	3.28203	4.47307	Chr3	5133605	5135902	+	50	+	1927	interaction97132	1946	24	0.070444	0	8	0.070444	800	-12.4268	26	1941	-15.7543	1600	-24	0.212811	0.841058	-0.145385	0.782619
18162621	18163121	AT2G43860	Chr2	18162944	18164428	NA	NA	Yes	0.249337	0.263262	18161834	18162334	AT2G43850	NA	NA	Yes	0.211256	0.402546	Chr2	18159181	18162044	+	604	+	1824	interaction85769	787	52	0.070444	0	23	0.070444	2300	-53.0209	515	1523	-15.7297	2900	-62	-0.559378	NA	0.0289653	0.956198
18940981	18941481	AT3G50970	Chr3	18940776	18941554	NA	Yes	Yes	0.746261	1.53001	18939989	18940489	AT3G50960	NA	Yes	Yes	0.262108	0.406151	Chr3	18938696	18940428	+	1044	+	510	interaction116570	992	31	0.070444	0	10	0.070444	1000	-16.1061	1018	382	-15.7293	2100	-30	1.17283	0.374724	0.000300106	0.999907
6090996	6091496	AT5G18390	Chr5	6090953	6092545	NA	NA	NA	1.30853	0.455642	6088577	6089077	AT5G18370	NA	NA	NA	0.168286	0.25188	Chr5	6085035	6088926	+	299	+	1458	interaction167087	2419	39	0.070444	0	15	0.070444	1500	-29.2074	251	1372	-15.7207	2400	-42	0.0979965	0.823729	-0.103168	0.811084
121950	122450	AT3G01324	Chr3	122139	122448	Yes	NA	Yes	0.135954	0.236311	118542	119042	AT3G01329	Yes	NA	Yes	3.14767	0.836308	Chr3	118872	119178	+	292	+	779	interaction88717	3408	14	0.070444	2e-06	2	0.070444	200	-1.3309	174	943	-15.7201	1200	-10	NA	NA	0.925172	0.70267
10287492	10287992	AT1G29390	Chr1	10286292	10288103	NA	NA	NA	0.157795	0.282475	10285503	10286003	AT1G29380	NA	NA	NA	0.108472	0.234859	Chr1	10284120	10285970	+	1586	+	70	interaction20154	1989	28	0.070444	0	10	0.070444	1000	-16.7509	1325	53	-15.7144	1800	-28	-0.228051	0.311022	-0.266499	0.603704
29305009	29305509	AT1G77940	Chr1	29303896	29305382	NA	NA	NA	0.269124	0.369042	29301006	29301506	AT1G77930	NA	NA	Yes	0.257212	0.418376	Chr1	29300999	29303570	+	291	+	1701	interaction56144	4003	59	0.070444	0	29	0.070444	2900	-73.9701	227	1651	-15.7084	3000	-74	-0.00302146	0.99294	-0.0140503	0.973658
26694509	26695009	AT5G66840	Chr5	26692921	26695296	NA	Yes	NA	2.56765	0.869773	26691915	26692415	AT5G66830	NA	Yes	Yes	3.37436	5.98733	Chr5	26691303	26692488	+	191	+	1357	interaction198242	2594	44	0.070444	0	19	0.070444	1900	-41.3688	149	1346	-15.6927	2500	-50	-0.429305	0.603856	-0.16112	0.913765
19022388	19022888	AT5G46874	Chr5	19022382	19022699	Yes	NA	Yes	4.15326	4.77299	19021412	19021912	AT5G46873	Yes	NA	Yes	2.81623	0.502912	Chr5	19021204	19021529	+	658	+	361	interaction185108	976	14	0.070444	2e-06	2	0.070444	200	-1.3309	576	194	-15.6849	1200	-10	2.82472	NA	NA	NA
22490482	22490982	AT1G61065	Chr1	22490243	22491461	NA	NA	Yes	2.05979	1.7531	22488640	22489140	AT1G61060	NA	NA	Yes	2.24707	1.85856	Chr1	22488547	22489711	+	918	+	1482	interaction38816	1842	49	0.070444	0	22	0.072422	2139.89	-49.6752	855	1773	-15.6831	2760.11	-56	0.887923	0.00150291	1.61886	NA
642480	642980	AT4G01510	Chr4	642732	644336	Yes	NA	Yes	2.14396	1.64577	626991	627491	AT4G01480	NA	Yes	Yes	0.298125	0.33064	Chr4	626117	628055	+	247	+	1152	interaction126420	15489	14	0.070444	2e-06	2	0.070444	200	-1.3309	207	1378	-15.6658	1200	-10	0.0457554	0.952304	-0.0314797	0.919373
11523383	11523883	AT2G27000	Chr2	11523303	11525095	NA	NA	Yes	0.471836	0.552665	11512952	11513452	AT2G26975	NA	NA	Yes	0.411743	0.529071	Chr2	11512860	11513553	+	308	+	1684	interaction70074	10431	14	0.070444	2e-06	2	0.070444	200	-1.3309	220	1557	-15.649	1200	-10	0.197632	0.483251	0.254161	0.320995
11234604	11235104	AT4G21040	Chr4	11234806	11235505	Yes	NA	Yes	0.193233	0.266496	11231555	11232055	AT4G21030	Yes	NA	Yes	4.11825	0.451658	Chr4	11231413	11231998	+	278	+	565	interaction141243	3049	14	0.070444	2e-06	2	0.070444	200	-1.33089	230	809	-15.6374	1200	-10	NA	NA	NA	NA
15620434	15620934	AT5G39030	Chr5	15620065	15622486	Yes	NA	Yes	0.426738	0.60431	15619545	15620045	AT5G39024	Yes	NA	Yes	1.22356	0.692808	Chr5	15619690	15619786	+	607	+	297	interaction177667	889	19	0.070444	0	4	0.070444	400	-3.97834	389	226	-15.6351	1500	-16	0.509484	0.0330476	NA	NA
4298643	4299143	AT1G12630	Chr1	4298888	4299475	Yes	NA	Yes	13.34	15.5236	4296983	4297483	AT1G12620	Yes	NA	Yes	0.235677	0.249347	Chr1	4294593	4297084	+	1392	+	142	interaction8512	1660	39	0.070444	0	16	0.070444	1600	-32.5521	1450	118	-15.5997	2300	-44	1.02528	0.298673	0.0113706	0.985924
17588040	17588540	AT2G42200	Chr2	17587406	17589630	NA	NA	Yes	2.51782	2.9213	17576943	17577443	AT2G42160	NA	NA	Yes	0.174355	0.292463	Chr2	17574640	17577463	+	1554	+	342	interaction84303	11097	19	0.070444	0	4	0.070444	400	-3.977	1531	249	-15.5944	1500	-16	-1.02747	0.00233089	0.193173	0.42008
626457	626957	AT1G02840	Chr1	626740	629819	NA	NA	NA	0.147234	0.265286	625536	626036	AT1G02830	NA	NA	Yes	0.317032	0.495931	Chr1	625144	625608	+	1273	+	456	interaction1540	921	54	0.070444	0	25	0.070444	2500	-59.911	1064	301	-15.5774	2900	-66	0.172343	0.300894	1.21356	NA
15109484	15109984	AT2G35970	Chr2	15109006	15109773	NA	NA	Yes	0.133322	0.226589	15107914	15108414	AT2G35960	NA	Yes	Yes	1.10491	1.99373	Chr2	15106939	15107993	+	504	+	1379	interaction79052	1570	14	0.070444	2e-06	2	0.070444	200	-1.33089	410	1249	-15.5268	1200	-10	-0.702378	NA	-0.270126	0.118354
12527926	12528426	AT4G24130	Chr4	12527752	12528593	NA	NA	Yes	0.178621	0.276987	12524916	12525416	AT4G24120	NA	NA	Yes	0.647452	0.605197	Chr4	12524490	12527341	+	911	+	555	interaction145210	3010	14	0.070444	2e-06	2	0.070444	200	-1.33089	808	420	-15.5235	1200	-10	0.202206	0.245396	-0.444246	0.107476
24779511	24780011	AT5G61660	Chr5	24779214	24779930	Yes	NA	Yes	0.338199	0.321921	24778074	24778574	AT5G61650	Yes	NA	Yes	1.00782	0.530541	Chr5	24778245	24779098	+	1351	+	343	interaction195476	1437	59	0.070444	0	29	0.070444	2900	-73.836	1152	245	-15.5152	3000	-74	0.147059	0.644135	0.215547	0.655531
7316491	7316991	AT4G12320	Chr4	7314777	7316669	NA	NA	Yes	4.32813	0.875064	7311908	7312408	AT4G12310	NA	NA	NA	0.236221	0.284391	Chr4	7310415	7312577	+	589	+	1994	interaction132881	4583	14	0.070444	2e-06	2	0.070444	200	-1.33089	454	1982	-15.5133	1200	-10	-0.327648	0.18796	-0.320842	0.0733891
13614538	13615038	AT2G31985	Chr2	13613927	13615692	NA	NA	Yes	2.07507	3.59384	13613111	13613611	AT2G31990	NA	NA	Yes	1.87419	1.73143	Chr2	13611350	13613573	+	132	+	1379	interaction75135	1427	28	0.070444	0	9	0.070444	900	-13.964	110	1245	-15.4995	1900	-28	0.472785	0.813764	0.391616	0.338894
19084541	19085041	AT3G51420	Chr3	19084034	19085858	NA	Yes	Yes	0.162413	0.255027	19075438	19075938	AT3G51390	NA	NA	Yes	0.445828	0.586055	Chr3	19075575	19078120	+	632	+	1553	interaction116929	9103	14	0.070444	2e-06	2	0.070444	200	-1.33089	577	1254	-15.4865	1200	-10	-0.0251921	0.946023	0.0749292	0.833017
18531078	18531578	AT5G45680	Chr5	18530879	18532337	NA	NA	NA	7.33616	13.2537	18529079	18529579	AT5G45670	NA	NA	Yes	0.149547	0.270349	Chr5	18528493	18530450	+	1876	+	124	interaction183713	1999	43	0.070444	0	19	0.070444	1900	-41.7092	1877	115	-15.4839	2400	-50	-0.0459025	0.896388	-0.21169	0.285601
17135465	17135965	AT3G46540	Chr3	17134090	17135587	NA	NA	NA	12.1904	4.70904	17132998	17133498	AT3G46530	NA	NA	Yes	0.391138	0.412548	Chr3	17130366	17133338	+	392	+	978	interaction112584	2467	27	0.070444	0	8	0.070444	800	-11.5675	273	756	-15.4541	1900	-26	-0.149624	0.589734	-0.181143	0.565051
7586399	7586899	AT4G12970	Chr4	7586142	7586849	NA	NA	Yes	7.25084	2.43929	7583517	7584017	AT4G12960	Yes	NA	Yes	5.46273	3.29631	Chr4	7583271	7584630	+	55	+	1641	interaction133536	2882	10	0.070444	0.017279	1	0.070444	100	-0.443924	20	1707	-15.4353	900	-6	0.0948692	0.817401	1.58649	NA
15591612	15592112	AT2G37100	Chr2	15591100	15592104	NA	Yes	Yes	4.41903	6.4362	15583543	15584043	AT2G37080	NA	NA	NA	0.119884	0.248311	Chr2	15581385	15585186	+	1576	+	65	interaction80118	8069	16	0.070444	0	3	0.070444	300	-2.5409	1438	62	-15.4352	1300	-12	-0.795364	0.00329722	-0.118848	0.622636
28250117	28250617	AT1G75270	Chr1	28250074	28251350	NA	NA	NA	1.19669	1.40733	28248998	28249498	AT1G75260	NA	NA	Yes	0.333346	0.443888	Chr1	28247808	28249441	+	997	+	160	interaction54263	1119	35	0.070444	0	13	0.070444	1300	-23.9011	1156	162	-15.4326	2200	-38	0.0774326	0.842593	-0.0598729	0.95505
3352882	3353382	AT3G10710	Chr3	3352288	3354237	NA	Yes	Yes	0.169613	0.30859	3350521	3351021	AT3G10700	NA	NA	NA	0.121767	0.196952	Chr3	3346577	3351023	+	499	+	1023	interaction94527	2361	19	0.070444	0	4	0.070444	400	-3.97091	465	918	-15.4121	1500	-14	-0.0426515	0.945962	-0.0379045	0.92711
10013927	10014427	AT1G28480	Chr1	10013473	10014073	Yes	NA	Yes	4.41432	3.16791	10012074	10012574	AT1G28470	Yes	NA	Yes	5.58149	3.52171	Chr1	10010180	10012198	+	1684	+	43	interaction19328	1853	15	0.070444	0	3	0.070444	300	-2.56686	1571	27	-15.3654	1200	-12	2.20835	4.79e-11	0.427982	0.259056
11531541	11532041	AT3G29680	Chr3	11531441	11532825	NA	NA	Yes	3.34644	2.79013	11528825	11529325	AT3G29670	NA	NA	Yes	5.05595	7.0179	Chr3	11527871	11529350	+	69	+	515	interaction109213	2716	16	0.070444	0	3	0.070444	300	-2.53972	66	533	-15.3525	1300	-12	0.000738194	0.999501	0.707243	0.37589
22869533	22870033	AT5G56470	Chr5	22869059	22869958	Yes	NA	Yes	9.94291	9.83709	22867988	22868488	AT5G56460	NA	NA	Yes	0.449027	0.308714	Chr5	22865109	22867996	+	1597	+	240	interaction191957	1545	53	0.070444	0	25	0.070444	2500	-60.2745	1822	220	-15.2956	2800	-64	NA	NA	-0.175016	0.559871
6830990	6831490	AT5G20240	Chr5	6829041	6831515	NA	NA	Yes	1.13621	0.405946	6827047	6827547	AT5G20230	NA	NA	Yes	5.37419	7.99169	Chr5	6826505	6827629	+	216	+	1755	interaction168271	3943	52	0.070444	0	25	0.070444	2500	-61.044	142	1671	-15.2926	2700	-64	0.14216	0.841007	1.16322	1.71e-05
15592486	15592986	AT2G37110	Chr2	15592551	15594014	NA	Yes	NA	4.41903	6.4362	15591497	15591997	AT2G37100	NA	Yes	Yes	3.10906	6.33291	Chr2	15591100	15592104	+	195	+	1576	interaction80136	989	71	0.070444	0	40	0.070444	4000	-116.389	160	1438	-15.2897	3100	-98	0.0951103	0.690806	-0.795364	0.00329722
17036844	17037344	AT3G46350	Chr3	17036426	17041680	Yes	NA	Yes	3.05795	1.89162	17030510	17031010	AT3G46340	Yes	NA	Yes	6.00228	2.74422	Chr3	17026657	17031842	+	1004	+	80	interaction112202	6334	16	0.070444	0	3	0.070444	300	-2.53844	1018	71	-15.2637	1300	-12	1.21356	NA	1.22572	NA
15412010	15412510	AT4G31875	Chr4	15411700	15412289	NA	NA	Yes	0.270403	0.301599	15402497	15402997	AT4G31840	NA	Yes	Yes	0.148911	0.258773	Chr4	15401639	15402617	+	1415	+	83	interaction149799	9513	18	0.070444	0	4	0.070444	400	-4.02038	1375	59	-15.2598	1400	-14	0.285133	0.699095	-0.00203796	0.996518
23845427	23845927	AT5G59070	Chr5	23845197	23847393	NA	Yes	Yes	3.56687	1.55015	23844493	23844993	AT5G59060	NA	Yes	Yes	2.41831	5.22621	Chr5	23844300	23844777	+	389	+	1797	interaction193703	934	74	0.070444	0	40	0.070444	4000	-113.736	318	1592	-15.2577	3400	-100	-0.0503359	0.97005	-1.22577	NA
25123059	25123559	AT1G67150	Chr1	25122458	25124695	Yes	NA	Yes	3.36649	2.46002	25121457	25121957	AT1G67148	Yes	NA	Yes	3.14443	1.00252	Chr1	25121234	25121898	+	47	+	813	interaction47227	1602	10	0.070444	0.01522	1	0.070444	100	-0.445282	22	741	-15.2437	900	-6	1.20417	0.1851	0.120195	0.878193
4385461	4385961	AT5G13620	Chr5	4385384	4386373	NA	Yes	Yes	1.73434	0.944762	4383932	4384432	AT5G13610	NA	Yes	Yes	0.19003	0.26199	Chr5	4383012	4385029	+	125	+	788	interaction164524	1529	28	0.070444	0	9	0.070444	900	-13.9237	129	1026	-15.225	1900	-28	NA	NA	-0.153333	0.665983
13819552	13820052	AT4G27670	Chr4	13818869	13819971	NA	NA	Yes	0.231929	0.303092	13817947	13818447	AT4G27660	NA	NA	Yes	0.0904091	0.191199	Chr4	13817094	13818136	+	1180	+	93	interaction147814	1605	24	0.070444	0	7	0.070444	700	-9.58277	1296	84	-15.2243	1700	-22	2.55681	0.0974657	0.23296	0.833303
7939957	7940457	AT2G18250	Chr2	7939906	7941678	NA	NA	Yes	0.132697	0.21869	7937420	7937920	AT2G18245	NA	NA	NA	0.174222	0.23936	Chr2	7937281	7939600	+	1856	+	176	interaction64044	2537	42	0.070444	0	18	0.070444	1800	-38.3418	1534	143	-15.198	2400	-48	0.154007	0.603493	0.0421659	0.936004
9398012	9398512	AT4G16700	Chr4	9395635	9398308	NA	NA	NA	0.141909	0.225933	9394037	9394537	AT4G16695	NA	Yes	NA	0.181552	0.261555	Chr4	9394182	9395517	+	106	+	1824	interaction137424	3975	20	0.070444	0	5	0.070444	500	-5.71187	64	1542	-15.1877	1500	-16	-0.188914	0.766125	0.216125	0.383307
25884532	25885032	AT1G68850	Chr1	25883615	25885247	NA	NA	Yes	2.33739	2.0858	25881555	25882055	AT1G68840	NA	Yes	NA	0.72606	2.76391	Chr1	25880322	25882222	+	764	+	70	interaction48996	2977	16	0.070444	0	3	0.070444	300	-2.53714	786	77	-15.1739	1300	-12	0.119703	0.689458	-0.512588	0.00916099
17598026	17598526	AT1G47786	Chr1	17597897	17599099	Yes	NA	Yes	5.06049	9.29641	17595035	17595535	AT1G47780	Yes	NA	Yes	6.58534	3.49514	Chr1	17594682	17595343	+	570	+	1171	interaction26875	2991	27	0.070444	0	8	0.070444	800	-11.5277	545	1313	-15.1452	1900	-26	NA	NA	-0.260808	NA
564419	564919	AT1G02640	Chr1	564204	567769	NA	NA	NA	0.137307	0.206506	561574	562074	AT1G02630	NA	NA	Yes	0.448873	0.673849	Chr1	560609	562424	+	1264	+	351	interaction1235	2845	21	0.070444	0	5	0.070444	500	-5.62485	876	435	-15.131	1600	-18	1.10696	0.0377967	0.610996	0.606996
4827378	4827878	AT5G14920	Chr5	4826478	4827980	NA	Yes	Yes	3.13117	0.583134	4820041	4820541	AT5G14890	NA	NA	Yes	0.17346	0.284334	Chr5	4817948	4821808	+	1372	+	65	interaction164831	7337	18	0.070444	0	4	0.070444	400	-4.01584	1199	64	-15.1187	1400	-14	0.461654	0.0404728	-0.00228252	0.998118
11565495	11565995	AT1G32150	Chr1	11565517	11568531	NA	NA	Yes	0.279547	0.338946	11561872	11562372	AT1G32130	NA	NA	Yes	0.309823	0.358466	Chr1	11558860	11561920	+	714	+	89	interaction22923	3623	16	0.070444	0	3	0.070444	300	-2.53552	615	86	-15.0647	1300	-12	0.328893	0.117324	-0.0131559	0.96632
26803389	26803889	AT5G67180	Chr5	26801948	26804249	NA	Yes	Yes	3.09696	0.595168	26798453	26798953	AT5G67160	NA	NA	Yes	0.247769	0.477734	Chr5	26797612	26799041	+	885	+	93	interaction198408	4936	16	0.070444	0	3	0.070444	300	-2.53536	723	87	-15.0541	1300	-12	-0.618596	0.00631521	-0.609826	0.0361456
21949018	21949518	AT3G59400	Chr3	21948716	21949710	NA	NA	Yes	0.131121	0.215262	21946006	21946506	AT3G59390	NA	NA	NA	0.116236	0.183781	Chr3	21946117	21948372	+	922	+	117	interaction122819	3012	22	0.070444	0	6	0.070444	600	-7.56493	985	78	-15.0418	1600	-20	-0.208162	0.243865	-0.141463	0.724198
5002427	5002927	AT1G14600	Chr1	5001010	5003370	Yes	NA	Yes	2.73963	1.85893	5000489	5000989	AT1G14590	Yes	NA	Yes	0.2182	0.292674	Chr1	4998815	5000643	+	946	+	1055	interaction10244	1938	47	0.070444	0	20	0.070444	2000	-43.5051	811	793	-15.0416	2700	-54	-0.285378	0.538111	-0.0980089	0.826953
4375456	4375956	AT3G13435	Chr3	4375424	4376069	NA	NA	Yes	0.122184	0.254071	4374010	4374510	AT3G13433	NA	NA	Yes	4.55953	4.00263	Chr3	4374235	4374712	+	412	+	870	interaction96302	1446	32	0.070444	0	11	0.070444	1100	-18.5704	298	795	-15.0378	2100	-32	0.577224	0.107511	-0.835647	NA
4382465	4382965	AT1G12855	Chr1	4382159	4383611	NA	NA	Yes	1.94298	2.47187	4381485	4381985	AT1G12850	NA	NA	NA	0.180627	0.28819	Chr1	4379706	4381612	+	1104	+	97	interaction8586	980	25	0.070444	0	8	0.070444	800	-11.8515	1247	62	-15.031	1700	-24	-1.1258	NA	-0.0551125	0.847317
15050050	15050550	AT5G37820	Chr5	15050260	15051542	Yes	NA	Yes	0.333346	0.443888	15045055	15045555	AT5G37810	Yes	NA	Yes	4.82364	1.12783	Chr5	15045231	15047807	+	1086	+	1094	interaction175714	4995	27	0.070444	0	8	0.070444	800	-11.5061	1219	1206	-14.9819	1900	-24	0.879514	0.446387	NA	NA
4014032	4014532	AT5G12400	Chr5	4013812	4021543	NA	NA	NA	0.31896	0.40699	4011880	4012380	AT5G12390	NA	NA	NA	0.129698	0.228035	Chr5	4010442	4012039	+	1670	+	101	interaction163770	2152	18	0.070444	0	4	0.070444	400	-4.01128	1863	70	-14.9797	1400	-14	-0.132387	0.565343	0.310765	0.234008
20744152	20744652	AT5G51010	Chr5	20744565	20745703	Yes	NA	Yes	7.17602	7.60768	20743372	20743872	AT5G51000	Yes	NA	Yes	4.67852	0.86116	Chr5	20742532	20743669	+	873	+	688	interaction187238	780	23	0.070444	0	6	0.070444	600	-7.44634	575	605	-14.9724	1700	-20	0.267891	0.0713066	3.82464	NA
14750420	14750920	AT2G34990	Chr2	14750259	14751168	NA	Yes	Yes	3.76987	5.87904	14746077	14746577	AT2G34970	NA	NA	NA	0.149604	0.246913	Chr2	14746306	14748781	+	1872	+	105	interaction78234	4343	20	0.070444	0	5	0.070444	500	-5.70024	1568	72	-14.968	1500	-16	-0.0749929	NA	-0.0173904	0.963253
8038418	8038918	AT5G23850	Chr5	8038051	8040938	NA	NA	NA	3.40302	1.93059	8034035	8034535	AT5G23830	NA	NA	Yes	2.50476	1.51129	Chr5	8033737	8034930	+	48	+	1811	interaction171204	4383	10	0.070444	0.015505	1	0.070444	100	-0.447365	26	2031	-14.9651	900	-6	0.101014	0.803133	0.838758	7.64e-07
12179999	12180499	AT4G23290	Chr4	12177737	12180826	NA	NA	Yes	1.01848	0.851109	12176980	12177480	AT4G23280	NA	NA	Yes	0.276616	0.33517	Chr4	12174739	12177471	+	1744	+	292	interaction144014	3019	49	0.070444	0	22	0.070444	2200	-50.1473	1805	300	-14.9602	2700	-58	-0.395909	0.00670432	-0.0395426	0.988096
27650655	27651155	AT1G73570	Chr1	27650991	27653942	NA	Yes	NA	1.48666	2.25478	27646517	27647017	AT1G73540	NA	NA	NA	0.178057	0.295713	Chr1	27645657	27646698	+	970	+	104	interaction52793	4138	16	0.070444	0	3	0.070444	300	-2.53371	925	99	-14.9448	1300	-12	-0.0457398	0.936848	-0.0522873	0.890655
7052492	7052992	AT4G11670	Chr4	7044243	7053091	NA	NA	NA	3.31606	2.98764	7042485	7042985	AT4G11660	NA	NA	NA	0.187798	0.214284	Chr4	7042629	7044708	+	1236	+	121	interaction132131	10007	27	0.070444	0	9	0.070444	900	-14.0785	1246	78	-14.9392	1800	-26	-0.0335961	0.936004	-0.643365	1.47e-05
228533	229033	AT1G01630	Chr1	229012	230917	NA	NA	NA	0.379902	0.595977	225351	225851	AT1G01620	NA	NA	NA	0.183201	0.331719	Chr1	225664	227302	+	92	+	1327	interaction506	3182	18	0.070444	0	4	0.070444	400	-4.00993	72	1250	-14.9392	1400	-14	0.0849222	0.710694	0.522763	0.0195096
17395512	17396012	AT2G41700	Chr2	17382889	17396110	NA	NA	NA	0.517148	0.424778	17381509	17382009	AT2G41690	NA	NA	Yes	4.10965	5.221	Chr2	17381722	17382577	+	904	+	1334	interaction83713	14003	25	0.070444	0	7	0.070444	700	-9.41276	811	1120	-14.9339	1800	-22	-0.273744	0.117918	0.0217901	0.987539
17485515	17486015	AT3G47450	Chr3	17483067	17486347	NA	NA	NA	0.137062	0.237155	17481479	17481979	AT3G47430	NA	NA	NA	0.293335	0.4275	Chr3	17480602	17481792	+	1229	+	46	interaction113479	4036	10	0.070444	0.014927	1	0.070444	100	-0.447788	1341	27	-14.9106	900	-6	-0.00587891	0.988113	-0.258265	0.0745175
2843661	2844161	AT3G09260	Chr3	2840476	2843781	Yes	NA	Yes	4.11134	0.976962	2839476	2839976	AT3G09250	NA	NA	NA	0.228295	0.271226	Chr3	2838999	2840614	+	766	+	146	interaction93302	4185	16	0.070444	0	3	0.070444	300	-2.53303	622	105	-14.9002	1300	-12	0.530812	1.73e-06	-0.343285	0.0912571
17260014	17260514	AT2G41400	Chr2	17259456	17260120	NA	NA	Yes	0.142854	0.223008	17252108	17252608	AT2G41380	NA	Yes	Yes	3.76987	5.87904	Chr2	17251940	17253057	+	127	+	1137	interaction83379	7906	16	0.070444	0	3	0.070444	300	-2.53293	106	1062	-14.8933	1300	-12	NA	NA	0.0538264	0.855486
3123945	3124445	AT5G09980	Chr5	3122730	3123964	NA	NA	Yes	0.404545	0.220011	3121023	3121523	AT5G09978	Yes	NA	Yes	2.14207	0.893756	Chr5	3120712	3121864	+	90	+	1337	interaction161883	2922	22	0.070444	0	6	0.070444	600	-7.55334	85	1616	-14.8902	1600	-20	0.207393	0.755295	0.698148	0.0119652
17380445	17380945	AT5G43310	Chr5	17379485	17385535	NA	NA	NA	0.130907	0.247512	17378913	17379413	AT5G43300	Yes	NA	Yes	2.66235	1.19111	Chr5	17376733	17379277	+	98	+	414	interaction181545	1532	16	0.070444	0	3	0.070444	300	-2.53243	111	347	-14.8607	1300	-12	0.120218	0.56559	1.24697	0.0505572
1605971	1606471	AT5G05430	Chr5	1605274	1606703	NA	NA	Yes	3.94196	3.00881	1604095	1604595	AT5G05420	NA	NA	Yes	1.57972	1.2379	Chr5	1604039	1604823	+	1507	+	1043	interaction158654	1876	65	0.081288	0	37	0.091137	2859.88	-100.789	1454	1312	-14.8583	2773	-82	0.332471	0.746778	0.236838	0.820994
13300475	13300975	AT4G26270	Chr4	13300794	13304347	NA	Yes	Yes	0.248761	0.312081	13298086	13298586	AT4G26260	Yes	NA	Yes	6.58093	4.86623	Chr4	13297697	13300387	+	245	+	1591	interaction146905	2389	78	0.070444	0	45	0.070444	4500	-134.883	214	1418	-14.854	3300	-108	0.135423	0.766463	1.57448	0.00223181
18531029	18531529	AT5G45680	Chr5	18530879	18532337	NA	NA	NA	0.792575	1.1613	18526998	18527498	AT5G45660	NA	NA	NA	0.18805	0.277516	Chr5	18525070	18527007	+	1876	+	66	interaction183709	4031	18	0.070444	0	4	0.070444	400	-4.00631	1877	78	-14.8317	1400	-14	-0.0459025	0.896388	0.353161	0.227868
27482060	27482560	AT1G73066	Chr1	27481784	27483715	NA	NA	NA	1.0965	0.62862	27479035	27479535	AT1G73060	NA	NA	Yes	0.157257	0.280226	Chr1	27478969	27481448	+	45	+	1103	interaction52333	3025	13	0.070444	6e-06	2	0.070444	200	-1.33097	40	1114	-14.8226	1100	-8	0.0752267	0.954488	-0.217962	0.130474
13603479	13603979	AT4G27120	Chr4	13601969	13604427	NA	NA	NA	0.126146	0.243049	13600898	13601398	AT4G27110	NA	NA	Yes	0.375039	0.656002	Chr4	13599125	13601552	+	28	+	1779	interaction147299	2581	12	0.070444	3.1e-05	2	0.070444	200	-1.33132	17	1707	-14.8003	1000	-8	0.0369296	0.90966	-1.55316	NA
12591501	12592001	AT1G34440	Chr1	12591347	12592737	Yes	NA	Yes	1.31812	0.229504	12589937	12590437	AT1G34430	NA	NA	NA	0.205216	0.281407	Chr1	12587751	12590192	+	74	+	1101	interaction24424	1564	18	0.070444	0	4	0.070444	400	-4.00522	80	903	-14.7999	1400	-14	0.558055	NA	-0.288459	0.0318131
5878076	5878576	AT1G17200	Chr1	5878399	5880041	Yes	NA	Yes	2.87399	1.10321	5875174	5875674	AT1G17190	Yes	NA	Yes	4.69355	4.1924	Chr1	5875349	5876545	+	159	+	593	interaction11570	2902	16	0.070444	0	3	0.070444	300	-2.53095	129	658	-14.7656	1300	-12	0.201509	0.341828	0.482209	0.047924
4264961	4265461	AT1G12500	Chr1	4263149	4265044	NA	NA	NA	0.257506	0.383896	4261410	4261910	AT1G12490	NA	NA	Yes	10.7519	13.6116	Chr1	4260782	4261869	+	115	+	1429	interaction8370	3551	22	0.070444	0	6	0.070444	600	-7.54357	92	1584	-14.7649	1600	-20	0.109237	0.684067	0.182299	0.952721
7678076	7678576	AT4G13235	Chr4	7677865	7678247	Yes	NA	Yes	2.68194	0.987244	7675431	7675931	AT4G13230	Yes	NA	Yes	3.33594	1.77552	Chr4	7675652	7676680	+	1034	+	826	interaction133826	2645	51	0.070444	0	23	0.070444	2300	-52.9627	952	589	-14.763	2800	-60	0.221235	0.630944	-0.10148	0.970898
15492513	15493013	AT2G36900	Chr2	15491039	15492822	NA	NA	Yes	2.09885	1.48384	15489560	15490060	AT2G36895	NA	NA	NA	0.221726	0.292485	Chr2	15489027	15490347	+	210	+	2032	interaction79988	2953	53	0.070444	0	26	0.070444	2600	-64.0945	170	1984	-14.7573	2700	-66	0.423918	0.0338191	-0.140418	0.478074
18354355	18354855	AT2G44470	Chr2	18354185	18358679	Yes	NA	Yes	0.716082	1.02121	18343536	18344036	AT2G44450	NA	NA	Yes	0.604645	0.411414	Chr2	18340920	18343849	+	1285	+	41	interaction86121	10819	10	0.070444	0.013316	1	0.070444	100	-0.449205	1059	31	-14.7327	900	-6	1.21356	NA	0.144336	0.668502
13165922	13166422	AT4G25920	Chr4	13165474	13166872	NA	NA	Yes	6.54834	13.7399	13164579	13165079	AT4G25910	NA	NA	NA	0.247001	0.335656	Chr4	13163928	13165205	+	803	+	879	interaction146300	1343	57	0.070444	0	27	0.070444	2700	-65.9442	883	779	-14.7194	3000	-70	0.150248	NA	0.147653	0.458687
8234120	8234620	AT1G23205	Chr1	8233996	8234893	NA	Yes	Yes	5.74656	10.9127	8229462	8229962	AT1G23200	NA	NA	Yes	11.2334	16.7154	Chr1	8227177	8229582	+	1906	+	116	interaction15927	4658	22	0.070444	0	6	0.070444	600	-7.53864	2021	96	-14.7026	1600	-20	-0.503867	0.0157288	-0.148948	0.812619
3564495	3564995	AT3G11380	Chr3	3564078	3565779	NA	Yes	Yes	0.151101	0.277544	3561029	3561529	AT3G11370	NA	Yes	Yes	3.80468	5.76556	Chr3	3561098	3562880	+	61	+	1802	interaction95323	3466	10	0.070444	0.018521	1	0.070444	100	-0.449504	32	2092	-14.6961	900	-6	1.61886	NA	0.38048	0.765406
2550036	2550536	AT3G07980	Chr3	2543615	2551225	NA	NA	NA	1.57922	1.24848	2540932	2541432	AT3G07970	Yes	NA	Yes	2.90047	2.85079	Chr3	2541005	2543432	+	116	+	1779	interaction92776	9104	18	0.070444	0	4	0.070444	400	-4.00013	91	1767	-14.6523	1400	-14	-0.119475	0.698201	0.180085	0.803828
18888007	18888507	AT3G50808	Chr3	18887613	18888047	NA	NA	Yes	3.40447	8.77997	18877053	18877553	AT3G50780	NA	Yes	Yes	0.196091	0.247754	Chr3	18875398	18877534	+	95	+	1771	interaction116431	10954	18	0.070444	0	4	0.070444	400	-4.00013	91	1553	-14.6523	1400	-14	-2.5676	NA	-0.17942	0.411679
6837126	6837626	AT4G11213	Chr4	6837559	6837643	NA	NA	NA	7.42223	16.6572	6835994	6836494	AT4G11211	Yes	NA	Yes	3.23246	1.63241	Chr4	6836105	6836588	+	135	+	791	interaction131621	1132	22	0.070444	0	6	0.070444	600	-7.53411	100	785	-14.6459	1600	-20	NA	NA	0.48012	0.000111967
9400487	9400987	AT3G25750	Chr3	9400954	9402088	Yes	NA	Yes	1.87852	1.47793	9399124	9399624	AT3G25740	NA	Yes	Yes	0.887623	0.367579	Chr3	9397785	9399762	+	89	+	848	interaction106010	1363	10	0.070444	0.022161	1	0.070444	100	-0.450048	34	939	-14.6302	900	-6	NA	NA	0.179091	0.52119
18237946	18238446	AT1G49310	Chr1	18237862	18238367	Yes	NA	Yes	0.329756	0.407956	18235947	18236447	AT1G49300	Yes	NA	Yes	1.12535	0.703194	Chr1	18234723	18237543	+	851	+	633	interaction28297	1999	37	0.070444	0	14	0.070444	1400	-26.2451	714	645	-14.6271	2300	-38	0.458928	0.0352918	0.217952	0.231493
2482084	2482584	AT5G07780	Chr5	2479513	2482850	NA	NA	Yes	0.11314	0.194091	2475112	2475612	AT5G07770	NA	Yes	Yes	0.77331	1.1786	Chr5	2474641	2479402	+	81	+	1798	interaction160744	6972	19	0.070444	0	5	0.070444	500	-5.78549	38	1876	-14.6233	1400	-16	0.0695211	0.95515	0.263664	0.321862
29973413	29973913	AT1G79650	Chr1	29972107	29975281	NA	NA	NA	11.0822	7.35121	29965405	29965905	AT1G79630	NA	NA	NA	0.118568	0.209677	Chr1	29962644	29965795	+	36	+	1318	interaction57854	8008	10	0.070444	0.011442	1	0.070444	100	-0.450296	35	1157	-14.6004	900	-6	0.0639149	0.851228	-0.0832474	0.776235
26773477	26773977	AT1G71002	Chr1	26773538	26773725	NA	NA	NA	1.14856	1.01988	26767503	26768003	AT1G70990	NA	Yes	Yes	4.79007	9.87753	Chr1	26767296	26768076	+	1542	+	102	interaction51140	5974	18	0.070444	0	4	0.070444	400	-3.99821	1435	96	-14.5975	1400	-14	NA	NA	0.275187	0.582405
13828551	13829051	AT4G27710	Chr4	13828431	13830596	NA	NA	NA	1.44693	0.515908	13827513	13828013	AT4G27700	NA	NA	NA	0.196257	0.302177	Chr4	13826373	13827823	+	1868	+	281	interaction147858	1038	60	0.070444	0	31	0.070444	3100	-81.3061	1633	205	-14.5877	2900	-76	0.109101	0.694754	-0.142798	0.448753
4049423	4049923	AT3G12740	Chr3	4049514	4051775	NA	NA	NA	0.18788	0.263479	4047494	4047994	AT3G12730	NA	NA	Yes	7.85255	10.4414	Chr3	4047071	4048614	+	198	+	1064	interaction95951	1929	24	0.070444	0	7	0.070444	700	-9.51732	127	989	-14.5824	1700	-22	0.233606	0.143309	-0.0594561	0.923707
13115989	13116489	AT1G35560	Chr1	13115825	13117235	NA	NA	Yes	0.573629	0.640349	13105558	13106058	AT1G35537	NA	NA	Yes	0.820127	0.271103	Chr1	13105205	13105570	+	1537	+	35	interaction25222	10431	10	0.070444	0.011032	1	0.070444	100	-0.450531	1356	36	-14.5725	900	-6	-0.434566	0.0116028	NA	NA
9131403	9131903	AT1G26390	Chr1	9130016	9131779	NA	NA	Yes	8.6132	9.27134	9127552	9128052	AT1G26380	NA	Yes	Yes	4.87793	8.23804	Chr1	9126736	9128528	+	683	+	91	interaction17631	3851	18	0.070444	0	4	0.070444	400	-3.99715	798	99	-14.5676	1400	-14	-2.32289	0.000114801	-1.51838	0.030148
119421	119921	AT1G01305	Chr1	119396	119997	NA	NA	Yes	0.663609	0.696879	116482	116982	AT1G01300	NA	NA	NA	0.149173	0.287605	Chr1	116942	118764	+	1062	+	37	interaction159	2939	12	0.070444	6.1e-05	2	0.070444	200	-1.33127	1093	18	-14.5515	1000	-8	NA	NA	-0.30526	0.062063
505970	506470	AT4G01190	Chr4	504210	506131	NA	Yes	Yes	10.1987	12.3818	494851	495351	AT4G01160	NA	NA	NA	0.207941	0.25519	Chr4	494975	497006	+	2021	+	47	interaction125988	11119	10	0.070444	0.01522	1	0.070444	100	-0.450752	1821	37	-14.5463	900	-6	-0.165022	0.911681	1.21356	NA
560448	560948	AT4G01350	Chr4	560258	562438	NA	NA	Yes	0.124524	0.20796	555129	555629	AT4G01340	NA	NA	Yes	1.76737	2.03092	Chr4	554538	556961	+	918	+	39	interaction126088	5319	10	0.070444	0.012599	1	0.070444	100	-0.450752	1249	37	-14.5463	900	-6	0.287091	0.451464	-0.0139284	NA
8262541	8263041	AT2G19080	Chr2	8262749	8264964	NA	NA	Yes	0.436563	0.307257	8261491	8261991	AT2G19070	Yes	NA	Yes	9.24687	9.76477	Chr2	8260037	8261985	+	147	+	1173	interaction65164	1050	35	0.070444	0	14	0.070444	1400	-26.8711	110	1346	-14.5409	2100	-38	0.0566239	0.865814	NA	NA
24775125	24775625	AT5G61640	Chr5	24775034	24776390	Yes	NA	Yes	2.59508	0.473825	24774417	24774917	AT5G61630	Yes	NA	Yes	6.40299	4.3896	Chr5	24773656	24774502	+	1599	+	133	interaction195418	708	22	0.070444	0	6	0.070444	600	-7.52428	1147	110	-14.5242	1600	-20	0.683597	0.000175902	NA	NA
8122444	8122944	AT2G18735	Chr2	8122118	8123076	NA	NA	NA	2.71687	4.74559	8116351	8116851	AT2G18720	NA	NA	Yes	3.60199	3.72985	Chr2	8114919	8116811	+	46	+	1118	interaction64764	6093	10	0.070444	0.014927	1	0.070444	100	-0.450962	38	1196	-14.5216	900	-6	0.333724	0.316111	-0.236201	0.913323
16101434	16101934	AT5G40280	Chr5	16101390	16104961	NA	NA	Yes	1.01534	1.10292	16096988	16097488	AT5G40270	NA	NA	Yes	0.336639	0.341272	Chr5	16093171	16097232	+	160	+	1588	interaction179178	4446	24	0.070444	0	7	0.070444	700	-9.51073	134	1159	-14.5209	1700	-22	-0.0623271	0.878193	-0.221128	0.398606
959999	960499	AT1G03820	Chr1	959868	960728	Yes	NA	Yes	3.71847	1.62128	957468	957968	AT1G03800	NA	Yes	Yes	8.15183	16.525	Chr1	957260	957998	+	1696	+	955	interaction2059	2531	62	0.083764	0	32	0.086139	2616.91	-83.0262	1910	944	-14.5199	2597.16	-78	-0.090703	0.810947	-0.717385	0.541918
18741997	18742497	AT3G50500	Chr3	18741589	18744157	NA	Yes	NA	4.29372	4.35713	18729506	18730006	AT3G50470	Yes	NA	Yes	4.09923	2.3209	Chr3	18729053	18730269	+	94	+	1284	interaction116260	12491	18	0.070444	0	4	0.070444	400	-3.99522	105	1196	-14.5132	1400	-14	0.189664	0.296836	1.55499	0.000988383
7631123	7631623	AT4G13090	Chr4	7631534	7632870	Yes	NA	Yes	5.54887	10.2084	7627662	7628162	AT4G13080	Yes	NA	Yes	2.75601	0.582611	Chr4	7626611	7628367	+	58	+	981	interaction133609	3461	10	0.070444	0.017925	1	0.070444	100	-0.451161	39	1005	-14.4982	900	-6	1.21356	NA	NA	NA
1584072	1584572	AT1G05400	Chr1	1584072	1585421	NA	Yes	Yes	3.00809	5.75548	1582997	1583497	AT1G05385	NA	Yes	Yes	0.146193	0.213867	Chr1	1582670	1583718	+	1255	+	134	interaction3197	1075	18	0.070444	0	4	0.070444	400	-3.99434	1250	108	-14.4885	1400	-14	-0.20071	0.871424	0.218701	0.426174
25267968	25268468	AT1G67455	Chr1	25268144	25269475	Yes	NA	Yes	0.0987608	0.23745	25266028	25266528	AT1G67450	Yes	NA	Yes	4.4691	2.02822	Chr1	25266162	25267359	+	1053	+	189	interaction47499	1940	42	0.070444	0	18	0.070444	1800	-38.0505	1083	199	-14.4823	2400	-48	NA	NA	NA	NA
23655992	23656492	AT5G58520	Chr5	23655233	23658162	NA	NA	NA	2.5969	0.868824	23654467	23654967	AT5G58510	NA	NA	NA	0.14908	0.222359	Chr5	23648152	23654552	+	129	+	824	interaction193272	1525	22	0.070444	0	6	0.070444	600	-7.52083	114	640	-14.4822	1600	-20	-0.0822259	0.813286	-0.0777131	0.807184
25833469	25833969	AT1G68780	Chr1	25831802	25833844	NA	NA	NA	0.212621	0.27063	25829110	25829610	AT1G68760	NA	NA	Yes	0.432727	0.497814	Chr1	25829041	25829813	+	1708	+	1397	interaction48802	4359	46	0.123399	0	19	0.121101	1105.21	-40.4095	1985	1277	-14.4707	1520.75	-52	-0.384936	0.059702	0.0336305	0.937205
436007	436507	AT1G02230	Chr1	435173	436776	NA	NA	Yes	0.186812	0.248348	429439	429939	AT1G02220	NA	NA	Yes	0.262686	0.301572	Chr1	428813	430647	+	968	+	1251	interaction761	6568	50	0.070444	0	23	0.071224	2274.79	-52.7783	1089	1369	-14.4568	2725.21	-58	0.455795	0.727658	-0.227347	0.465623
29485947	29486447	AT1G78380	Chr1	29486412	29487906	NA	NA	Yes	0.197103	0.268706	29485027	29485527	AT1G78370	NA	NA	Yes	1.83673	2.26233	Chr1	29484268	29485290	+	510	+	1562	interaction56430	920	89	0.070444	0	52	0.070444	5200	-160.548	416	1589	-14.4464	3700	-126	0.0929859	0.74464	-0.559411	0.0415056
17065493	17065993	AT2G40900	Chr2	17063121	17065684	NA	Yes	Yes	5.17652	2.86497	17058549	17059049	AT2G40890	NA	NA	NA	0.167313	0.250942	Chr2	17058052	17060652	+	1732	+	119	interaction82642	6944	20	0.070444	0	5	0.070444	500	-5.66911	1483	109	-14.413	1500	-16	-0.562439	0.000832219	-0.0543713	0.837134
3159350	3159850	AT1G09760	Chr1	3159124	3161692	NA	NA	NA	0.176715	0.272628	3157397	3157897	AT1G09750	NA	Yes	Yes	0.758702	1.55022	Chr1	3157500	3159148	+	46	+	1157	interaction5879	1953	10	0.070444	0.014927	1	0.070444	100	-0.452169	45	1179	-14.3821	900	-6	-0.0945982	0.710584	-0.106011	0.761568
18482925	18483425	AT3G49830	Chr3	18482382	18483940	NA	NA	Yes	0.137949	0.226968	18481041	18481541	AT3G49820	NA	NA	Yes	2.90889	3.25305	Chr3	18481236	18481722	+	1251	+	691	interaction115612	1884	71	0.070444	0	38	0.070444	3800	-105.519	1235	436	-14.3796	3300	-94	0.315506	0.813296	0.423355	0.802211
22071454	22071954	AT1G59960	Chr1	22071291	22073147	NA	NA	Yes	5.81382	2.638	22070086	22070586	AT1G59950	NA	NA	Yes	4.91308	3.92405	Chr1	22068032	22070588	+	493	+	918	interaction37841	1368	35	0.070444	0	13	0.070444	1300	-23.612	502	881	-14.3642	2200	-36	0.00253177	0.996658	2.77923	NA
23497025	23497525	AT1G63350	Chr1	23494934	23497631	NA	NA	Yes	2.09674	0.959697	23492999	23493499	AT1G63340	NA	NA	NA	0.707088	0.554994	Chr1	23491881	23494019	+	1449	+	63	interaction41319	4026	10	0.070444	0.018892	1	0.070444	100	-0.452448	1415	47	-14.3505	900	-6	0.416711	0.315728	0.810368	NA
9579003	9579503	AT3G26180	Chr3	9578216	9580086	NA	NA	Yes	4.51353	0.44698	9574876	9575376	AT3G26170	NA	NA	Yes	1.07865	0.993252	Chr3	9573359	9575148	+	713	+	856	interaction106398	4127	16	0.070444	0	3	0.070444	300	-2.52402	559	576	-14.3372	1300	-12	-0.0555494	0.861849	0.596956	0.0366307
139575	140075	AT4G00320	Chr4	139938	141643	Yes	NA	Yes	2.8699	5.46459	138451	138951	AT4G00315	Yes	NA	Yes	6.05934	2.10909	Chr4	137403	138888	+	125	+	929	interaction125050	1124	20	0.070444	0	5	0.070444	500	-5.66455	118	1149	-14.3354	1500	-16	1.21356	NA	NA	NA
12415577	12416077	AT4G23880	Chr4	12415676	12416450	Yes	NA	Yes	0.122419	0.212525	12414110	12414610	AT4G23870	NA	NA	Yes	5.07441	3.8253	Chr4	12414229	12415049	+	732	+	927	interaction144966	1467	46	0.070444	0	20	0.070444	2000	-43.5943	565	722	-14.3317	2600	-52	0.196365	0.660752	0.920243	0.00160933
1046098	1046598	AT4G02380	Chr4	1046203	1046997	NA	NA	Yes	2.84564	3.28061	1042568	1043068	AT4G02370	NA	NA	NA	0.229656	0.327941	Chr4	1042337	1043206	+	814	+	74	interaction127187	3530	13	0.070444	1.1e-05	2	0.070444	200	-1.33092	661	61	-14.3253	1100	-8	0.466272	0.652515	0.330662	0.172775
3822101	3822601	AT1G11360	Chr1	3821442	3823088	NA	NA	Yes	0.241852	0.327452	3820444	3820944	AT1G11350	NA	NA	NA	0.131131	0.210977	Chr1	3817590	3820805	+	1663	+	54	interaction6946	1657	21	0.070444	0	6	0.070444	600	-7.62858	1473	54	-14.3238	1500	-18	0.108927	0.65494	-0.08771	0.774217
21323050	21323550	AT1G57570	Chr1	21320937	21324637	Yes	NA	Yes	0.251621	0.263335	21312484	21312984	AT1G57550	Yes	NA	Yes	2.51458	1.03299	Chr1	21312540	21312809	+	35	+	1457	interaction36030	10566	10	0.070444	0.011032	1	0.070444	100	-0.452703	49	1442	-14.3218	900	-6	0.863664	0.136595	NA	NA
13005975	13006475	AT4G25435	Chr4	13006233	13006306	NA	NA	NA	0.741764	1.22041	13001509	13002009	AT4G25433	NA	NA	Yes	0.507397	0.698681	Chr4	13001197	13001870	+	645	+	61	interaction146205	4466	10	0.070444	0.018521	1	0.070444	100	-0.452703	738	49	-14.3218	900	-6	NA	NA	-0.412631	0.835977
3970876	3971376	AT5G12270	Chr5	3970130	3971301	NA	NA	Yes	0.119223	0.185558	3967467	3967967	AT5G12260	NA	NA	NA	0.188446	0.292296	Chr5	3966364	3968878	+	657	+	54	interaction163593	3409	10	0.070444	0.017047	1	0.070444	100	-0.452939	700	51	-14.2954	900	-6	0.586642	0.376226	0.0444909	0.913188
14008481	14008981	AT4G28270	Chr4	14007538	14009019	NA	NA	NA	0.107556	0.201375	14005003	14005503	AT4G28260	NA	NA	NA	0.138224	0.266915	Chr4	14004484	14006970	+	947	+	115	interaction148246	3478	25	0.070444	0	8	0.070444	800	-11.7593	709	82	-14.2923	1700	-24	0.0355851	0.930893	0.237048	0.164719
7826068	7826568	AT5G23230	Chr5	7825881	7826611	NA	Yes	Yes	0.1833	0.300829	7820422	7820922	AT5G23220	NA	Yes	Yes	16.2622	33.4161	Chr5	7819815	7820676	+	1472	+	822	interaction170701	5646	30	0.070444	0	10	0.070444	1000	-16.0523	1349	863	-14.291	2000	-28	0.425879	0.47056	-0.0180229	0.971466
1611480	1611980	AT4G03635	Chr4	1611751	1612756	NA	NA	NA	0.138735	0.226739	1609445	1609945	AT4G03630	NA	Yes	Yes	5.70271	10.2606	Chr4	1608749	1610037	+	275	+	945	interaction128264	2035	50	0.070444	0	24	0.070444	2400	-57.6173	144	836	-14.2896	2600	-60	0.0988715	0.864233	NA	NA
12968507	12969007	AT2G30432	Chr2	12968614	12970209	NA	NA	Yes	7.86882	6.78629	12961495	12961995	AT2G30420	NA	NA	Yes	0.750362	0.871938	Chr2	12960826	12962162	+	1133	+	1146	interaction73687	7012	16	0.070444	0	3	0.070444	300	-2.52311	1164	1009	-14.2825	1300	-12	-0.172488	0.894648	0.520766	0.225121
18126377	18126877	AT4G38850	Chr4	18126170	18126680	NA	NA	NA	0.133108	0.240333	18123039	18123539	AT4G38830	NA	NA	Yes	0.107476	0.216458	Chr4	18122325	18124943	+	198	+	1674	interaction154713	3338	18	0.070444	0	4	0.070444	400	-3.98618	147	1492	-14.2643	1400	-14	-0.0310621	0.981296	-0.0828837	0.936444
1151929	1152429	AT5G04190	Chr5	1150891	1152481	NA	NA	Yes	0.175224	0.281466	1148088	1148588	AT5G04180	NA	NA	NA	0.16856	0.177828	Chr5	1147647	1149284	+	1044	+	46	interaction157600	3841	10	0.070444	0.014927	1	0.070444	100	-0.453259	976	54	-14.2598	900	-6	0.357673	0.362337	0.870342	0.774217
22788397	22788897	AT1G61710	Chr1	22788858	22790576	Yes	NA	Yes	0.128449	0.203592	22786994	22787494	AT1G61700	Yes	NA	Yes	3.07449	1.24891	Chr1	22787011	22788333	+	171	+	1256	interaction39872	1403	29	0.070444	0	10	0.070444	1000	-16.2752	141	1234	-14.2583	1900	-28	-0.333568	0.891958	2.94581	NA
8574919	8575419	AT1G24210	Chr1	8573548	8575156	NA	NA	Yes	0.283931	0.27549	8571508	8572008	AT1G24200	NA	NA	Yes	0.924151	0.666612	Chr1	8571172	8572377	+	173	+	1678	interaction16730	3411	53	0.070444	0	27	0.070444	2700	-68.0204	140	1815	-14.2474	2600	-66	0.502115	0.620364	NA	NA
505936	506436	AT4G01190	Chr4	504210	506131	NA	Yes	Yes	0.161989	0.214044	503029	503529	AT4G01180	NA	Yes	Yes	3.79644	5.99787	Chr4	501286	503394	+	2021	+	153	interaction126000	2907	13	0.070444	1.7e-05	2	0.070444	200	-1.33092	1821	67	-14.2455	1100	-8	-0.165022	0.911681	3.17452	NA
4487371	4487871	AT5G13920	Chr5	4485930	4487433	NA	NA	NA	2.81935	0.876528	4481006	4481506	AT5G13900	NA	NA	NA	0.847539	1.16422	Chr5	4481231	4481889	+	759	+	73	interaction164631	6365	13	0.070444	1.1e-05	2	0.070444	200	-1.33092	589	67	-14.2455	1100	-8	-0.372074	0.523685	-0.0847538	0.82074
17814508	17815008	AT5G44230	Chr5	17814335	17816309	NA	NA	NA	1.20461	1.59231	17802983	17803483	AT5G44200	NA	NA	NA	0.163133	0.242291	Chr5	17801813	17804130	+	1679	+	49	interaction182082	11525	13	0.070444	6e-06	2	0.070444	200	-1.33092	1595	67	-14.2455	1100	-8	-0.140211	0.78545	0.0595133	0.843333
14068017	14068517	AT2G33190	Chr2	14067971	14069111	NA	NA	Yes	0.137553	0.245265	14067029	14067529	AT2G33180	NA	NA	Yes	0.162958	0.245563	Chr2	14066462	14067467	+	1135	+	200	interaction76706	988	55	0.070444	0	28	0.070444	2800	-71.0662	1376	169	-14.2243	2700	-68	1.21356	NA	-0.253273	0.215206
17988916	17989416	AT2G43270	Chr2	17988206	17989491	NA	NA	Yes	0.1814	0.332232	17984565	17985065	AT2G43260	NA	NA	NA	0.211278	0.318577	Chr2	17983690	17985104	+	1295	+	168	interaction85224	4351	22	0.070444	0	6	0.070444	600	-7.49922	1349	148	-14.2239	1600	-18	4.88706	NA	0.0247133	0.961235
25488456	25488956	AT5G63670	Chr5	25487926	25489428	NA	NA	NA	10.9013	4.24631	25485531	25486031	AT5G63660	NA	NA	Yes	2.52004	2.39761	Chr5	25485691	25486062	+	1014	+	78	interaction196359	2925	10	0.070444	0.021058	1	0.070444	100	-0.453634	917	58	-14.2185	900	-6	0.331658	0.0435354	-0.124298	0.835598
24281476	24281976	AT1G65360	Chr1	24281336	24282151	Yes	NA	Yes	0.229951	0.282271	24277945	24278445	AT1G65352	Yes	NA	Yes	2.81935	0.876528	Chr1	24277771	24278298	+	1379	+	1505	interaction43570	3531	43	0.107332	0	27	0.15694	1211.92	-65.708	1875	1752	-14.2163	1610.25	-48	NA	NA	NA	NA
2694972	2695472	AT4G05270	Chr4	2694938	2695328	NA	NA	Yes	0.232795	0.375564	2688603	2689103	AT4G05240	Yes	NA	Yes	5.32997	7.38865	Chr4	2688199	2689018	+	85	+	438	interaction129291	6369	13	0.070444	1.2e-05	2	0.070444	200	-1.33092	70	410	-14.2112	1100	-8	NA	NA	NA	NA
859024	859524	AT2G02955	Chr2	859452	862076	NA	NA	NA	0.131513	0.24237	856089	856589	AT2G02950	NA	NA	Yes	0.455473	0.671506	Chr2	854946	856538	+	46	+	991	interaction59271	2935	10	0.070444	0.014927	1	0.070444	100	-0.45372	59	861	-14.2091	900	-6	0.165466	0.713215	0.573796	0.0283647
6907632	6908132	AT3G19870	Chr3	6907394	6911233	Yes	NA	NA	7.40944	7.33744	6894557	6895057	AT3G19840	NA	NA	NA	0.167296	0.28708	Chr3	6891085	6897356	+	1924	+	60	interaction99901	13075	10	0.070444	0.018329	1	0.070444	100	-0.45372	2081	59	-14.2091	900	-6	-0.0715829	0.796456	0.0059691	0.988772
712422	712922	AT5G03040	Chr5	710101	712994	NA	NA	NA	0.183009	0.252557	709504	710004	AT5G03030	NA	NA	NA	0.184221	0.196714	Chr5	708317	709703	+	835	+	59	interaction156818	2918	10	0.070444	0.018131	1	0.070444	100	-0.45372	664	59	-14.2091	900	-6	0.374466	0.0338459	0.0498861	0.903792
20283130	20283630	AT1G54340	Chr1	20283479	20286786	NA	Yes	Yes	5.58169	2.72255	20273549	20274049	AT1G54310	NA	NA	NA	0.215146	0.317231	Chr1	20273566	20275574	+	1884	+	67	interaction33361	9581	13	0.070444	1e-05	2	0.070444	200	-1.33092	1461	71	-14.2004	1100	-8	0.0131515	0.969416	-0.0801055	0.82641
10378450	10378950	AT1G29680	Chr1	10377789	10378961	NA	NA	Yes	2.09046	1.936	10376434	10376934	AT1G29670	NA	NA	Yes	2.66873	1.87184	Chr1	10375762	10377871	+	1471	+	428	interaction20479	2016	41	0.070444	0	17	0.070444	1700	-34.7595	1319	393	-14.1736	2400	-44	2.64307	0.238572	0.186211	0.316186
24779547	24780047	AT5G61660	Chr5	24779214	24779930	Yes	NA	Yes	8.66301	8.48006	24770988	24771488	AT5G61610	NA	NA	Yes	3.47128	3.46912	Chr5	24770098	24771252	+	1351	+	64	interaction195463	8559	10	0.070444	0.019066	1	0.070444	100	-0.454109	1152	64	-14.1668	900	-6	0.147059	0.644135	0.758342	NA
2727323	2727823	AT4G05350	Chr4	2726909	2727530	NA	Yes	Yes	8.34673	13.3768	2725990	2726490	AT4G05340	NA	Yes	Yes	1.50493	1.73759	Chr4	2725689	2726065	+	307	+	182	interaction129323	1333	20	0.070444	0	5	0.070444	500	-5.654	244	146	-14.1594	1500	-16	NA	NA	NA	NA
19239996	19240496	AT3G51860	Chr3	19239426	19242913	NA	NA	Yes	11.4604	11.7678	19234517	19235017	AT3G51850	NA	NA	NA	0.159722	0.242676	Chr3	19232466	19235889	+	1193	+	62	interaction117372	5479	17	0.070444	0	4	0.070444	400	-4.04229	1213	43	-14.1565	1300	-14	0.468204	0.0326071	0.0416509	0.875657
10482664	10483164	AT4G19170	Chr4	10481785	10483857	NA	Yes	Yes	0.163806	0.261982	10477943	10478443	AT4G19160	NA	NA	NA	0.157011	0.247215	Chr4	10477295	10480141	+	769	+	83	interaction139654	4721	10	0.070444	0.021594	1	0.070444	100	-0.454248	724	66	-14.1517	900	-6	-0.567792	0.000870048	0.950092	0.0894118
9933086	9933586	AT3G26935	Chr3	9932599	9935499	NA	NA	NA	0.510344	0.480068	9930192	9930692	AT3G26932	NA	NA	Yes	0.182561	0.283625	Chr3	9930269	9932120	+	90	+	325	interaction107545	2894	13	0.070444	1.3e-05	2	0.070444	200	-1.33091	76	285	-14.1512	1100	-8	-0.0128098	0.971208	-0.493079	0.00174822
20365062	20365562	AT5G50070	Chr5	20364555	20365429	Yes	NA	Yes	7.68316	8.30125	20362538	20363038	AT5G50060	Yes	NA	Yes	3.63816	1.67295	Chr5	20362549	20363461	+	1468	+	269	interaction186797	2524	22	0.070444	0	6	0.070444	600	-7.49259	1359	163	-14.1466	1600	-18	-2.5676	NA	-0.819433	NA
19900958	19901458	AT3G53700	Chr3	19900279	19902884	NA	Yes	Yes	2.958	5.35802	19893053	19893553	AT3G53680	NA	NA	NA	0.121164	0.23214	Chr3	19892862	19897412	+	1853	+	63	interaction118592	7905	10	0.070444	0.018892	1	0.070444	100	-0.454314	1654	67	-14.1446	900	-6	-0.0621243	0.856288	0.229111	0.46732
5442906	5443406	AT3G16040	Chr3	5443090	5443952	NA	NA	NA	3.1747	1.36441	5439888	5440388	AT3G16030	NA	NA	NA	0.20522	0.2696	Chr3	5439608	5442802	+	135	+	915	interaction97447	3018	30	0.070444	0	11	0.070444	1100	-18.8849	101	797	-14.143	1900	-30	3.89181	NA	0.185798	0.557095
24473591	24474091	AT5G60840	Chr5	24473318	24474491	NA	NA	NA	0.183922	0.357293	24470442	24470942	AT5G60820	NA	NA	Yes	0.245123	0.341214	Chr5	24469586	24470895	+	34	+	1689	interaction194743	3149	9	0.070444	0.12351	1	0.070444	100	-0.431543	11	2036	-14.1259	800	-4	-0.0348461	0.934924	-0.0297701	0.953856
6892974	6893474	AT5G20390	Chr5	6892830	6894195	NA	Yes	Yes	0.935218	0.754949	6887475	6887975	AT5G20380	NA	Yes	Yes	0.558389	0.825305	Chr5	6887724	6892432	+	824	+	74	interaction168414	5499	13	0.070444	1.1e-05	2	0.070444	200	-1.33091	923	79	-14.1249	1100	-8	NA	NA	0.0394726	0.887264
21387521	21388021	AT5G52760	Chr5	21386823	21387703	Yes	NA	Yes	9.34739	9.6097	21383005	21383505	AT5G52740	NA	NA	Yes	2.21687	0.749288	Chr5	21382529	21383180	+	1041	+	107	interaction188915	4516	13	0.070444	1.5e-05	2	0.070444	200	-1.33091	1038	79	-14.1249	1100	-8	0.328678	0.801131	-0.927231	NA
7010616	7011116	AT5G20710	Chr5	7010521	7014249	Yes	NA	Yes	6.51231	10.6424	6998045	6998545	AT5G20680	NA	NA	NA	0.178523	0.27974	Chr5	6998102	7001910	+	1031	+	77	interaction168529	12571	10	0.070444	0.020938	1	0.070444	100	-0.454502	1133	70	-14.1244	900	-6	0.789812	0.259059	-0.117748	0.668197
22653411	22653911	AT5G55930	Chr5	22652714	22656106	NA	NA	Yes	6.36964	5.21789	22646029	22646529	AT5G55920	NA	NA	NA	0.156954	0.23736	Chr5	22645482	22649447	+	1010	+	82	interaction191435	7382	10	0.070444	0.021491	1	0.070444	100	-0.454502	931	70	-14.1244	900	-6	0.985472	2.62e-06	-0.146918	0.567021
25272063	25272563	AT1G67470	Chr1	25272181	25273576	NA	NA	NA	0.268487	0.276777	25268008	25268508	AT1G67455	Yes	NA	Yes	2.71958	1.00349	Chr1	25268144	25269475	+	73	+	1053	interaction47543	4055	10	0.070444	0.020427	1	0.070444	100	-0.454561	71	1083	-14.1181	900	-6	0.535542	0.06683	NA	NA
1179972	1180472	AT2G03870	Chr2	1179983	1181437	NA	NA	NA	0.123757	0.257469	1175358	1175858	AT2G03850	NA	NA	Yes	4.34878	3.98434	Chr2	1175580	1176702	+	81	+	385	interaction60123	4614	10	0.070444	0.021388	1	0.070444	100	-0.454561	71	324	-14.1181	900	-6	0.037135	0.921634	1.9107	0.0211246
7626461	7626961	AT4G13080	Chr4	7626611	7628367	Yes	NA	Yes	0.375298	0.591291	7624514	7625014	AT4G13075	NA	NA	Yes	1.42373	0.265465	Chr4	7624679	7625192	+	174	+	174	interaction133596	1947	10	0.070444	0.02611	1	0.070444	100	-0.454561	71	139	-14.1181	900	-6	NA	NA	NA	NA
1721457	1721957	AT1G05750	Chr1	1721508	1724734	NA	NA	Yes	0.2647	0.256704	1718945	1719445	AT1G05730	NA	NA	Yes	0.826576	0.36612	Chr1	1718554	1720303	+	809	+	197	interaction3690	2512	29	0.070444	0	10	0.070444	1000	-16.246	762	158	-14.1082	1900	-28	0.210717	0.708422	-0.274321	0.801917
6240143	6240643	AT5G18700	Chr5	6235095	6240733	NA	NA	NA	2.70027	3.35638	6233516	6234016	AT5G18690	NA	Yes	Yes	4.51407	8.44827	Chr5	6233518	6234206	+	567	+	87	interaction167238	6627	10	0.070444	0.021982	1	0.070444	100	-0.454781	636	75	-14.0945	900	-6	-0.452812	0.00691149	-0.200358	0.46717
21122020	21122520	AT5G52010	Chr5	21121482	21122985	NA	NA	Yes	0.119858	0.22805	21120475	21120975	AT5G52000	NA	NA	Yes	0.182034	0.257215	Chr5	21119023	21121119	+	219	+	1776	interaction188253	1545	71	0.070444	0	40	0.070444	4000	-114.935	218	1658	-14.0902	3100	-96	-0.0764508	0.81922	1.27784	NA
3737969	3738469	AT5G11610	Chr5	3735349	3738217	NA	Yes	Yes	6.71656	7.56641	3717972	3718472	AT5G11570	NA	NA	Yes	7.17602	7.60768	Chr5	3715942	3718276	+	89	+	871	interaction163413	19997	10	0.070444	0.022161	1	0.070444	100	-0.454833	76	777	-14.089	900	-6	0.197256	0.715005	0.382101	0.673451
5532021	5532521	AT1G16150	Chr1	5532414	5534877	NA	NA	Yes	0.251904	0.554606	5525546	5526046	AT1G16130	NA	NA	Yes	0.133886	0.27474	Chr1	5525490	5528212	+	100	+	424	interaction11090	6475	10	0.070444	0.023032	1	0.070444	100	-0.454883	77	494	-14.0837	900	-6	-0.160221	0.862425	1.03639	0.00973154
23227093	23227593	AT1G62720	Chr1	23227531	23229150	NA	NA	NA	0.784921	0.366314	23225539	23226039	AT1G62710	Yes	NA	Yes	5.39463	2.65376	Chr1	23223873	23226916	+	472	+	128	interaction40763	1554	10	0.070444	0.024575	1	0.070444	100	-0.454931	432	78	-14.0785	900	-6	0.324311	0.853689	0.509253	0.00881547
4746799	4747299	AT3G14250	Chr3	4745925	4746958	NA	Yes	Yes	6.52739	7.97558	4741423	4741923	AT3G14240	NA	NA	NA	0.182324	0.359759	Chr3	4741472	4744117	+	381	+	108	interaction96746	5376	10	0.070444	0.023544	1	0.070444	100	-0.454979	406	79	-14.0735	900	-6	1.61886	NA	-0.0937696	0.668502
851417	851917	AT4G01960	Chr4	851209	853165	NA	NA	NA	0.117308	0.217228	840895	841395	AT4G01935	NA	NA	NA	0.216473	0.272725	Chr4	841056	842364	+	67	+	1508	interaction126889	10522	10	0.070444	0.019559	1	0.070444	100	-0.455115	82	1149	-14.0591	900	-6	0.15564	0.547587	-0.400326	0.0988328
9336424	9336924	AT3G25650	Chr3	9335875	9336459	NA	NA	Yes	7.52631	2.35482	9334483	9334983	AT3G25640	Yes	NA	Yes	11.2848	11.7703	Chr3	9333718	9334804	+	982	+	111	interaction105721	1941	10	0.070444	0.023715	1	0.070444	100	-0.455158	957	83	-14.0546	900	-6	NA	NA	0.152824	0.687456
22777608	22778108	AT3G61560	Chr3	22777828	22780191	NA	Yes	Yes	18.8553	37.6202	22774490	22774990	AT3G61540	NA	Yes	NA	0.129468	0.200834	Chr3	22773385	22775827	+	1278	+	68	interaction124287	3118	15	0.070444	0	3	0.070444	300	-2.54829	1004	45	-14.0539	1200	-10	-0.0310134	0.941366	-0.170379	0.511586
9049037	9049537	AT4G15970	Chr4	9049327	9051370	Yes	NA	Yes	2.59122	4.309	9046955	9047455	AT4G15960	Yes	NA	Yes	3.54846	2.14593	Chr4	9045623	9047449	+	409	+	586	interaction136771	2082	26	0.070444	0	8	0.070444	800	-11.547	367	509	-14.0508	1800	-24	1.60186	NA	0.145165	0.761839
2287369	2287869	AT1G07440	Chr1	2286148	2287730	NA	NA	Yes	1.1707	1.05469	2279008	2279508	AT1G07420	NA	NA	NA	0.141208	0.276617	Chr1	2277806	2280297	+	642	+	104	interaction4765	8361	10	0.070444	0.023292	1	0.070444	100	-0.4552	506	84	-14.0501	900	-6	-0.344222	0.13579	0.0833823	0.797502
3832986	3833486	AT1G11380	Chr1	3832622	3834191	NA	NA	NA	0.189103	0.314411	3822999	3823499	AT1G11360	NA	NA	Yes	0.241852	0.327452	Chr1	3821442	3823088	+	91	+	810	interaction7024	9987	10	0.070444	0.022339	1	0.070444	100	-0.455281	86	659	-14.0416	900	-6	1.28711	4.6e-09	0.108927	0.65494
1965121	1965621	AT4G04090	Chr4	1964979	1965650	NA	NA	Yes	0.165477	0.228764	1963009	1963509	AT4G04080	Yes	NA	Yes	3.07156	1.28696	Chr4	1963357	1964423	+	818	+	170	interaction128304	2112	30	0.070444	0	11	0.070444	1100	-18.8619	1226	106	-14.0378	1900	-30	NA	NA	NA	NA
5007970	5008470	AT1G14610	Chr1	5008243	5014533	NA	NA	NA	0.165525	0.237206	5002964	5003464	AT1G14600	Yes	NA	Yes	2.73963	1.85893	Chr1	5001010	5003370	+	95	+	451	interaction10292	5006	10	0.070444	0.02266	1	0.070444	100	-0.455358	88	394	-14.0334	900	-6	-0.212847	0.138672	-0.285378	0.538111
3944459	3944959	AT5G12200	Chr5	3941527	3944811	NA	NA	NA	0.167372	0.204773	3932196	3932696	AT5G12170	Yes	NA	Yes	0.637991	0.459709	Chr5	3931561	3935129	+	108	+	1593	interaction163578	12263	13	0.070444	1.5e-05	2	0.070444	200	-1.33091	92	1487	-14.032	1100	-8	0.0123574	0.972607	-0.0581039	0.877533
895467	895967	AT1G03590	Chr1	894253	897518	NA	NA	NA	0.117846	0.202764	891139	891639	AT1G03560	NA	NA	NA	0.141201	0.238948	Chr1	890155	892410	+	95	+	587	interaction1874	4328	10	0.070444	0.02266	1	0.070444	100	-0.455432	90	535	-14.0257	900	-6	0.0656948	0.844569	0.0621419	0.878191
17964079	17964579	AT2G43220	Chr2	17964218	17966211	NA	Yes	Yes	0.258107	0.297925	17963095	17963595	AT2G43210	NA	Yes	Yes	0.447496	0.647714	Chr2	17960699	17963727	+	374	+	101	interaction85112	984	10	0.070444	0.023101	1	0.070444	100	-0.455432	407	90	-14.0257	900	-6	0.558125	NA	0.0111928	0.976825
19185846	19186346	AT3G51720	Chr3	19185050	19186634	NA	NA	NA	0.217315	0.254092	19177144	19177644	AT3G51690	Yes	NA	Yes	3.93261	1.29601	Chr3	19176373	19178161	+	108	+	1526	interaction117333	8702	10	0.070444	0.023544	1	0.070444	100	-0.455432	90	1596	-14.0257	900	-6	-0.340025	0.130581	1.21356	NA
29487163	29487663	AT1G78380	Chr1	29486412	29487906	NA	NA	Yes	0.26194	0.255699	29473501	29474001	AT1G78340	NA	NA	NA	0.462837	0.490138	Chr1	29472891	29473863	+	1239	+	75	interaction56445	13662	13	0.070444	1.1e-05	2	0.070444	200	-1.33091	1160	94	-14.0201	1100	-8	0.0929859	0.74464	-0.0571153	0.888292
4670428	4670928	AT1G13630	Chr1	4669783	4672957	NA	NA	NA	0.532607	0.632462	4665458	4665958	AT1G13610	Yes	NA	Yes	5.69235	2.98332	Chr1	4663830	4666031	+	84	+	476	interaction9229	4970	10	0.070444	0.021696	1	0.070444	100	-0.455503	92	476	-14.0182	900	-6	-0.0742812	0.925356	0.705718	0.325525
5296150	5296650	AT4G08360	Chr4	5295932	5296978	Yes	NA	Yes	0.152773	0.236408	5292473	5292973	AT4G08351	NA	NA	NA	0.249436	0.184414	Chr4	5292393	5292579	+	445	+	106	interaction129667	3677	10	0.070444	0.02342	1	0.070444	100	-0.455503	484	92	-14.0182	900	-6	2.04025	0.0626153	NA	NA
12594544	12595044	AT2G29330	Chr2	12594589	12596330	Yes	NA	Yes	0.293896	0.27918	12592057	12592557	AT2G29320	NA	NA	Yes	1.45242	0.409267	Chr2	12592147	12593686	+	114	+	1430	interaction72489	2487	10	0.070444	0.023887	1	0.070444	100	-0.455571	94	1415	-14.0111	900	-6	0.890736	0.00163742	0.146937	0.57366
22612620	22613120	AT5G55870	Chr5	22612636	22613311	NA	NA	NA	0.319054	0.264281	22608506	22609006	AT5G55856	Yes	NA	Yes	3.64267	2.96252	Chr5	22607926	22608640	+	527	+	141	interaction191416	4114	10	0.070444	0.025089	1	0.070444	100	-0.455571	552	94	-14.0111	900	-6	NA	NA	-1.55316	NA
10473504	10474004	AT3G28150	Chr3	10471841	10473754	NA	NA	NA	4.21191	2.3614	10456507	10457007	AT3G28100	NA	NA	Yes	0.521539	0.161113	Chr3	10456098	10460965	+	122	+	1457	interaction108395	16997	10	0.070444	0.024296	1	0.070444	100	-0.455603	95	1251	-14.0077	900	-6	-0.0841881	0.962073	0.041005	0.91537
19569940	19570440	AT3G52800	Chr3	19569310	19570682	NA	NA	Yes	0.585342	0.299	19558998	19559498	AT3G52770	NA	NA	Yes	0.53304	0.700759	Chr3	19557720	19559007	+	87	+	1979	interaction117946	10942	10	0.070444	0.021982	1	0.070444	100	-0.455603	95	1695	-14.0077	900	-6	0.502021	0.00201974	-0.431078	0.671098
7520913	7521413	AT2G17295	Chr2	7520941	7521021	NA	NA	Yes	0.189127	0.236755	7517118	7517618	AT2G17290	NA	NA	NA	0.387963	0.331701	Chr2	7516414	7519633	+	117	+	1486	interaction63104	3795	10	0.070444	0.024044	1	0.070444	100	-0.455698	98	1511	-13.9979	900	-6	0.773883	NA	0.397423	0.0221735
12633498	12633998	AT2G29500	Chr2	12633090	12633805	NA	NA	Yes	2.47114	0.969949	12631419	12631919	AT2G29490	Yes	NA	Yes	1.23284	0.440873	Chr2	12631377	12632473	+	376	+	851	interaction72729	2079	18	0.070444	0	4	0.070444	400	-3.97563	278	639	-13.9859	1400	-14	0.311901	0.319753	0.529327	0.00874242
10192425	10192925	AT3G27520	Chr3	10192421	10193499	NA	NA	NA	0.143325	0.25289	10184110	10184610	AT3G27500	Yes	NA	Yes	3.53516	2.38642	Chr3	10182832	10185081	+	93	+	1089	interaction107893	8315	10	0.070444	0.022502	1	0.070444	100	-0.455815	102	1214	-13.9857	900	-6	-0.0310207	0.96312	-0.0118858	0.994912
7923054	7923554	AT1G22440	Chr1	7922427	7924944	NA	NA	Yes	2.47876	2.66231	7913921	7914421	AT1G22410	NA	NA	NA	0.226882	0.337145	Chr1	7912045	7915003	+	1123	+	114	interaction15368	9133	10	0.070444	0.023887	1	0.070444	100	-0.455843	1197	103	-13.9828	900	-6	0.2852	0.100608	-0.206087	0.171947
587475	587975	AT4G01430	Chr4	585597	588029	Yes	NA	Yes	0.180688	0.331393	579138	579638	AT4G01410	NA	Yes	Yes	3.46604	5.4189	Chr4	578164	579169	+	132	+	576	interaction126214	8337	10	0.070444	0.024741	1	0.070444	100	-0.455843	103	545	-13.9828	900	-6	-0.267465	0.626859	0.347136	0.156773
8078972	8079472	AT2G18620	Chr2	8078287	8079360	NA	Yes	Yes	6.18083	3.3137	8074356	8074856	AT2G18600	Yes	NA	Yes	5.23658	3.87526	Chr2	8073199	8074982	+	91	+	1212	interaction64588	4616	10	0.070444	0.022339	1	0.070444	100	-0.45587	104	1130	-13.9799	900	-6	0.00941737	0.994912	1.00407	0.00570818
7899954	7900454	AT1G22380	Chr1	7900386	7902332	NA	NA	Yes	4.61761	5.75624	7897459	7897959	AT1G22360	NA	NA	Yes	2.70603	3.39888	Chr1	7894857	7897591	+	1297	+	245	interaction15132	2495	29	0.070444	0	10	0.070444	1000	-16.2201	1086	177	-13.9779	1900	-28	0.782301	0.178153	0.475818	0.00188701
18617014	18617514	AT3G50220	Chr3	18617423	18618729	NA	Yes	Yes	0.30353	0.483542	18615910	18616410	AT3G50210	NA	NA	NA	0.246115	0.322973	Chr3	18614169	18616452	+	179	+	1480	interaction115829	1104	20	0.070444	0	5	0.070444	500	-5.64257	197	1182	-13.974	1500	-16	-0.143993	0.85055	0.222311	0.37895
23338019	23338519	AT5G57625	Chr5	23337849	23338807	NA	Yes	Yes	0.246797	0.270702	23334611	23335111	AT5G57620	Yes	NA	Yes	10.6297	8.42532	Chr5	23334816	23336566	+	804	+	225	interaction192842	3408	22	0.070444	0	6	0.070444	600	-7.47733	757	213	-13.972	1600	-18	0.207895	0.555465	-0.0101598	0.986914
8877590	8878090	AT1G25320	Chr1	8877856	8880310	Yes	NA	Yes	0.772546	0.41637	8868108	8868608	AT1G25290	NA	NA	NA	0.190281	0.277074	Chr1	8867107	8869092	+	1383	+	96	interaction17160	9482	10	0.070444	0.022739	1	0.070444	100	-0.455949	1007	107	-13.9717	900	-6	-0.000324095	0.999907	-0.15251	0.611976
15413172	15413672	AT2G36760	Chr2	15413041	15414594	NA	NA	Yes	0.13324	0.198519	15410563	15411063	AT2G36750	NA	NA	Yes	0.951937	0.795432	Chr2	15410461	15412038	+	633	+	112	interaction79717	2609	13	0.070444	1.5e-05	2	0.070444	200	-1.3309	764	104	-13.9679	1100	-8	0.629484	0.580009	0.603555	0.0188333
17911061	17911561	AT2G43070	Chr2	17910887	17914870	NA	Yes	Yes	7.85548	3.68725	17909130	17909630	AT2G43060	NA	Yes	Yes	5.55004	13.4879	Chr2	17909184	17910082	+	730	+	479	interaction85050	1931	26	0.070444	0	8	0.070444	800	-11.5326	827	486	-13.9516	1800	-24	-0.122846	0.58378	-0.0856998	0.871725
18512040	18512540	AT1G49980	Chr1	18507970	18513172	NA	NA	NA	0.153033	0.208996	18503351	18503851	AT1G49970	NA	NA	NA	0.171337	0.260103	Chr1	18501569	18504609	+	133	+	1157	interaction28658	8689	10	0.070444	0.024779	1	0.070444	100	-0.456182	117	1397	-13.9476	900	-6	0.0184673	0.963266	-0.0572995	0.827669
17803962	17804462	AT4G37870	Chr4	17802693	17806539	NA	Yes	Yes	9.32864	6.18465	17791668	17792168	AT4G37840	NA	NA	Yes	1.21037	1.23402	Chr4	17790146	17792198	+	87	+	1166	interaction154197	12294	10	0.070444	0.021982	1	0.070444	100	-0.456182	117	1298	-13.9476	900	-6	0.0674034	0.787608	3.36167	NA
2073490	2073990	AT3G06630	Chr3	2070387	2073800	NA	NA	NA	0.121251	0.226538	2060545	2061045	AT3G06610	NA	NA	NA	0.126156	0.270945	Chr3	2060736	2062067	+	1484	+	124	interaction91980	12945	10	0.070444	0.024389	1	0.070444	100	-0.456224	1625	119	-13.9432	900	-6	-0.00694397	0.994912	0.16563	0.610321
8002495	8002995	AT1G22620	Chr1	7997675	8002944	NA	NA	NA	0.121959	0.217504	7988151	7988651	AT1G22600	NA	Yes	Yes	2.66856	4.80027	Chr1	7987140	7989217	+	148	+	1314	interaction15696	14344	13	0.070444	1.7e-05	2	0.070444	200	-1.3309	112	1608	-13.9332	1100	-8	-0.0624417	0.837134	1.55239	0.00308864
29635415	29635915	AT1G78820	Chr1	29634123	29635813	NA	Yes	Yes	8.23655	3.85095	29627515	29628015	AT1G78800	NA	NA	NA	0.157332	0.233302	Chr1	29625658	29627989	+	1684	+	130	interaction57195	7900	13	0.070444	1.6e-05	2	0.070444	200	-1.3309	1538	112	-13.9332	1100	-8	0.132732	0.682124	-0.137712	0.613032
12147485	12147985	AT4G23200	Chr4	12145379	12147934	NA	NA	Yes	0.147335	0.259616	12143601	12144101	AT4G23190	NA	NA	Yes	0.142564	0.220125	Chr4	12141031	12143833	+	99	+	821	interaction143749	3884	10	0.070444	0.022967	1	0.070444	100	-0.456342	125	1004	-13.9311	900	-6	-0.853552	0.216587	0.409982	0.137843
21629975	21630475	AT1G58300	Chr1	21628011	21629996	Yes	NA	Yes	5.71822	3.36354	21625582	21626082	AT1G58290	NA	NA	NA	0.217965	0.332054	Chr1	21623725	21626200	+	707	+	124	interaction36357	4393	13	0.070444	1.6e-05	2	0.070444	200	-1.3309	822	114	-13.9253	1100	-8	1.52112	0.26649	0.196976	0.270775
28682935	28683435	AT1G76440	Chr1	28682128	28683750	NA	Yes	Yes	0.205548	0.250655	28678626	28679126	AT1G76430	NA	Yes	Yes	4.95996	7.89064	Chr1	28678934	28681995	+	781	+	163	interaction55122	4309	10	0.070444	0.025813	1	0.070444	100	-0.456466	725	132	-13.9184	900	-6	0.0269245	0.960464	0.0665006	0.983977
15422464	15422964	AT5G38520	Chr5	15421572	15423431	NA	NA	Yes	12.416	22.595	15412981	15413481	AT5G38490	NA	Yes	Yes	0.997602	1.50135	Chr5	15411671	15413132	+	1095	+	161	interaction176816	9483	10	0.070444	0.025757	1	0.070444	100	-0.456466	1322	132	-13.9184	900	-6	-0.196798	0.177047	1.21356	NA
7535568	7536068	AT4G12840	Chr4	7533438	7536263	NA	NA	NA	0.419915	0.393597	7522098	7522598	AT4G12800	NA	NA	NA	0.274579	0.301664	Chr4	7521321	7522670	+	148	+	806	interaction133338	13470	10	0.070444	0.025337	1	0.070444	100	-0.456547	137	625	-13.9101	900	-6	-0.0931508	0.869905	-0.142484	0.485594
21979547	21980047	AT3G59470	Chr3	21978846	21980753	NA	Yes	Yes	0.136069	0.158197	21978177	21978677	AT3G59460	NA	NA	Yes	5.08815	8.14338	Chr3	21977512	21978323	+	131	+	134	interaction122931	1370	10	0.070444	0.024702	1	0.070444	100	-0.456578	146	139	-13.907	900	-6	0.161563	0.64623	-0.420052	NA
18317361	18317861	AT3G49390	Chr3	18314526	18317998	NA	NA	NA	7.98879	15.8571	18312028	18312528	AT3G49380	NA	NA	Yes	2.27141	2.6298	Chr3	18311908	18313490	+	714	+	273	interaction115315	5333	20	0.070444	0	5	0.070444	500	-5.63802	579	229	-13.9017	1500	-16	-0.225091	0.278074	0.14712	0.919559
26705587	26706087	AT5G66870	Chr5	26705861	26708676	NA	Yes	Yes	2.04149	1.2838	26691901	26692401	AT5G66830	NA	Yes	Yes	3.37436	5.98733	Chr5	26691303	26692488	+	206	+	1357	interaction198301	13686	10	0.070444	0.026817	1	0.070444	100	-0.456665	145	1346	-13.8981	900	-6	0.017687	0.975895	-0.16112	0.913765
7643995	7644495	AT3G21700	Chr3	7644349	7646383	Yes	NA	Yes	1.90729	0.951829	7641977	7642477	AT3G21690	NA	NA	Yes	1.50863	1.63152	Chr3	7638662	7642205	+	668	+	213	interaction101522	2018	10	0.070444	0.026945	1	0.070444	100	-0.456678	626	146	-13.8967	900	-6	-0.239682	0.37043	0.14298	0.408451
17350499	17350999	AT5G43230	Chr5	17348875	17352747	NA	NA	Yes	0.14731	0.252856	17348167	17348667	AT5G43210	Yes	NA	Yes	0.550324	0.350555	Chr5	17347566	17348641	+	113	+	269	interaction181512	2332	10	0.070444	0.023831	1	0.070444	100	-0.456678	146	199	-13.8967	900	-6	-0.153932	0.849584	0.220139	0.672505
7830537	7831037	AT5G23250	Chr5	7830359	7832843	NA	NA	NA	1.10137	0.760511	7828376	7828876	AT5G23240	NA	Yes	Yes	0.690253	1.13103	Chr5	7826731	7828724	+	157	+	598	interaction170783	2161	10	0.070444	0.025636	1	0.070444	100	-0.456692	147	381	-13.8953	900	-6	-0.195237	0.351535	0.0996617	0.918224
9663445	9663945	AT3G26390	Chr3	9663449	9663950	NA	Yes	Yes	1.03137	1.14035	9660533	9661033	AT3G26380	NA	Yes	NA	0.237835	0.361953	Chr3	9660064	9663298	+	399	+	1742	interaction106844	2912	52	0.070444	0	25	0.070444	2500	-59.9342	294	1899	-13.8935	2700	-62	NA	NA	-0.095562	0.725628
14194580	14195080	AT2G33510	Chr2	14194149	14195647	NA	NA	Yes	5.92951	1.75011	14190118	14190618	AT2G33500	NA	NA	Yes	0.181105	0.257789	Chr2	14187986	14190254	+	525	+	178	interaction76959	4462	13	0.070444	1.8e-05	2	0.070444	200	-1.3309	484	126	-13.8836	1100	-8	-0.0885667	0.837134	-0.0655563	0.894011
16515129	16515629	AT4G34580	Chr4	16515326	16519534	Yes	NA	Yes	0.368099	0.340117	16513076	16513576	AT4G34570	NA	NA	NA	0.286534	0.260991	Chr4	16511000	16514343	+	632	+	151	interaction151182	2053	13	0.070444	1.7e-05	2	0.070444	200	-1.3309	670	126	-13.8836	1100	-8	0.0545569	0.910596	-0.441895	0.0564739
19213971	19214471	AT2G46760	Chr2	19213027	19215166	NA	NA	Yes	7.83957	8.84694	19210044	19210544	AT2G46750	NA	NA	Yes	11.4043	10.5538	Chr2	19208319	19210958	+	707	+	1730	interaction87434	3927	47	0.070444	0	21	0.070444	2100	-46.6647	583	1821	-13.8827	2600	-54	-0.509562	0.17759	0.317597	0.169371
22918576	22919076	AT5G56620	Chr5	22918520	22921139	NA	NA	Yes	0.133131	0.207402	22917631	22918131	AT5G56610	NA	NA	Yes	0.629539	0.545126	Chr5	22916709	22918338	+	165	+	551	interaction192237	945	13	0.070444	1.8e-05	2	0.070444	200	-1.3309	129	484	-13.8744	1100	-8	0.183933	0.823376	0.214171	0.624832
23952357	23952857	AT5G59380	Chr5	23952260	23953707	NA	NA	NA	2.49276	1.2312	23950588	23951088	AT5G59370	Yes	NA	Yes	3.55612	2.00511	Chr5	23949738	23951837	+	72	+	1224	interaction194237	1769	22	0.070444	0	7	0.070444	700	-9.74922	46	1556	-13.8724	1500	-20	0.116103	0.767875	-0.337642	0.811084
21031180	21031680	AT3G56780	Chr3	21031612	21033202	Yes	NA	Yes	0.128011	0.204216	21029071	21029571	AT3G56770	Yes	NA	Yes	6.04889	6.29787	Chr3	21029201	21030618	+	350	+	182	interaction120518	2109	10	0.070444	0.026305	1	0.070444	100	-0.45693	281	167	-13.8711	900	-6	0.162713	0.951219	0.0146993	0.993233
18311565	18312065	AT3G49380	Chr3	18311908	18313490	NA	NA	Yes	1.89126	0.467168	18304960	18305460	AT3G49370	NA	NA	NA	0.18758	0.277271	Chr3	18304741	18307906	+	134	+	948	interaction115241	6605	10	0.070444	0.024818	1	0.070444	100	-0.45699	173	1134	-13.865	900	-6	0.14712	0.919559	0.109139	0.856175
12891008	12891508	AT2G30220	Chr2	12891265	12892537	NA	NA	Yes	2.41272	3.01651	12889778	12890278	AT2G30210	NA	Yes	Yes	4.24301	7.03732	Chr2	12887445	12889874	+	158	+	491	interaction73435	1230	10	0.070444	0.025667	1	0.070444	100	-0.457	174	381	-13.864	900	-6	0.624857	0.705948	-0.200681	0.556975
18407558	18408058	AT4G39660	Chr4	18406764	18409564	NA	NA	Yes	0.179042	0.187138	18400542	18401042	AT4G39640	NA	NA	Yes	1.37419	1.20766	Chr4	18399954	18402963	+	273	+	1318	interaction155150	7016	10	0.070444	0.027807	1	0.070444	100	-0.457	174	1540	-13.864	900	-6	0.116197	0.655958	0.158097	0.652323
607118	607618	AT3G02800	Chr3	606470	607886	NA	NA	Yes	0.610684	0.706692	604048	604548	AT3G02780	NA	NA	Yes	0.115039	0.243732	Chr3	602432	604684	+	414	+	331	interaction90094	3070	10	0.070444	0.02836	1	0.070444	100	-0.457074	318	182	-13.8565	900	-6	0.163847	0.832856	0.0725968	0.752418
25909302	25909802	AT5G64810	Chr5	25908412	25909803	NA	NA	Yes	2.62265	1.43308	25905958	25906458	AT5G64800	NA	NA	Yes	5.36622	3.96908	Chr5	25906082	25906403	+	1011	+	230	interaction197026	3344	10	0.070444	0.027232	1	0.070444	100	-0.457133	871	189	-13.8505	900	-6	-0.325496	0.827346	-0.557703	0.721808
19747976	19748476	AT1G53010	Chr1	19747846	19748383	NA	NA	Yes	7.77728	2.59684	19743314	19743814	AT1G52990	Yes	NA	Yes	3.25948	1.89547	Chr1	19740502	19743449	+	197	+	698	interaction31851	4662	10	0.070444	0.026635	1	0.070444	100	-0.457188	196	767	-13.845	900	-6	-2.52372	NA	-0.00663274	0.995844
15785993	15786493	AT5G39450	Chr5	15785716	15787946	Yes	NA	Yes	1.83673	2.26233	15776013	15776513	AT5G39430	Yes	NA	Yes	5.39019	2.10862	Chr5	15775301	15777599	+	1373	+	179	interaction178252	9980	10	0.070444	0.026234	1	0.070444	100	-0.457307	1355	213	-13.833	900	-6	-0.137654	0.773957	1.21356	NA
21759214	21759714	AT5G53560	Chr5	21759366	21760578	NA	NA	NA	0.145424	0.233033	21757031	21757531	AT5G53550	NA	NA	Yes	0.180794	0.280976	Chr5	21755290	21758921	+	782	+	168	interaction189194	2183	13	0.070444	1.8e-05	2	0.070444	200	-1.3309	600	145	-13.8321	1100	-8	0.143341	0.401854	-0.18405	0.34356
11715103	11715603	AT4G22115	Chr4	11714742	11715167	Yes	NA	Yes	1.50165	0.651853	11705923	11706423	AT4G22090	NA	Yes	Yes	6.36668	9.52176	Chr4	11704002	11706042	+	1010	+	239	interaction142387	9180	10	0.070444	0.027368	1	0.070444	100	-0.45732	990	215	-13.8317	900	-6	1.61886	NA	0.38579	NA
16234995	16235495	AT2G38860	Chr2	16233314	16235235	NA	NA	NA	0.211256	0.402546	16223049	16223549	AT2G38820	NA	NA	NA	0.173323	0.302501	Chr2	16221835	16223662	+	2000	+	161	interaction80907	11946	13	0.070444	1.8e-05	2	0.070444	200	-1.3309	1972	146	-13.8297	1100	-8	-0.0220007	0.952081	0.210453	0.345349
18531546	18532046	AT4G39955	Chr4	18530542	18532259	NA	Yes	NA	0.229704	0.270123	18527985	18528485	AT4G39952	NA	Yes	NA	0.176889	0.357006	Chr4	18527679	18530007	+	100	+	1372	interaction155638	3561	25	0.070444	0	8	0.070444	800	-11.696	106	1522	-13.8283	1700	-24	0.091649	0.773736	-0.210097	0.808729
7242439	7242939	AT4G12090	Chr4	7242164	7242924	NA	NA	Yes	0.437411	0.516458	7231922	7232422	AT4G12070	NA	NA	NA	0.238597	0.372842	Chr4	7231821	7234501	+	960	+	191	interaction132524	10517	13	0.070444	1.9e-05	2	0.070444	200	-1.3309	836	147	-13.8275	1100	-8	0.285258	0.688445	0.205598	0.552313
198937	199437	AT3G01510	Chr3	198678	201742	NA	Yes	Yes	3.93261	1.29601	198014	198514	AT3G01500	NA	NA	Yes	0.716832	0.761618	Chr3	194723	198019	+	823	+	1588	interaction88973	923	82	0.070444	0	46	0.070444	4600	-134.985	956	1299	-13.8265	3600	-112	-0.333944	0.0666386	-0.0988949	0.708418
18103868	18104368	AT2G43660	Chr2	18103750	18104581	Yes	NA	Yes	0.408291	0.425293	18102931	18103431	AT2G43650	Yes	NA	Yes	0.416592	0.37961	Chr2	18099237	18103345	+	1250	+	414	interaction85592	937	31	0.070444	0	11	0.070444	1100	-18.5487	987	346	-13.8258	2000	-30	0.439426	0.821704	-0.150597	0.532262
26660932	26661432	AT5G66770	Chr5	26660599	26662894	NA	NA	NA	5.88012	3.9943	26653501	26654001	AT5G66760	NA	NA	NA	0.128011	0.204216	Chr5	26653657	26657536	+	1098	+	305	interaction198001	7431	10	0.070444	0.028139	1	0.070444	100	-0.45738	924	225	-13.8257	900	-6	-0.634249	0.00134833	-0.0486233	0.856288
7686125	7686625	AT5G22970	Chr5	7686252	7686837	Yes	NA	Yes	0.210533	0.325379	7682002	7682502	AT5G22950	Yes	NA	Yes	0.407436	0.334418	Chr5	7681304	7682903	+	280	+	562	interaction170402	4123	10	0.070444	0.027887	1	0.070444	100	-0.457451	238	464	-13.8186	900	-6	NA	NA	0.0613805	0.835873
24476507	24477007	AT1G65800	Chr1	24473120	24476715	Yes	NA	Yes	4.54808	4.507	24466800	24467300	AT1G65780	Yes	NA	Yes	4.00308	1.13505	Chr1	24462957	24466888	+	224	+	885	interaction44511	9707	10	0.070444	0.027132	1	0.070444	100	-0.457481	244	1032	-13.8155	900	-6	-0.0308096	0.948275	0.330144	NA
12719999	12720499	AT4G24650	Chr4	12720393	12721443	Yes	NA	Yes	0.342275	0.497062	12718007	12718507	AT4G24640	NA	NA	Yes	7.85596	6.57342	Chr4	12717787	12719017	+	289	+	586	interaction145799	1992	10	0.070444	0.027983	1	0.070444	100	-0.457486	245	468	-13.8151	900	-6	NA	NA	NA	NA
13288055	13288555	AT2G31180	Chr2	13286720	13288176	Yes	NA	Yes	0.620108	0.452303	13285493	13285993	AT2G31170	NA	NA	Yes	0.520463	0.321745	Chr2	13282354	13285666	+	1410	+	258	interaction74495	2562	10	0.070444	0.027628	1	0.070444	100	-0.457491	1502	246	-13.8146	900	-6	0.771767	0.169492	-0.149015	0.56947
12676947	12677447	AT4G24550	Chr4	12675733	12679040	Yes	NA	Yes	0.133024	0.242929	12673922	12674422	AT4G24540	Yes	NA	Yes	5.33547	3.63547	Chr4	12670964	12674072	+	133	+	1198	interaction145703	3025	25	0.070444	0	8	0.070444	800	-11.694	107	1137	-13.8141	1700	-24	-0.0822689	0.735814	1.20252	1.85e-05
18138459	18138959	AT4G38890	Chr4	18135799	18139206	NA	NA	Yes	6.92216	3.6696	18134626	18135126	AT4G38880	NA	NA	Yes	2.12431	1.28161	Chr4	18134115	18135714	+	231	+	548	interaction154812	3833	10	0.070444	0.027248	1	0.070444	100	-0.457524	253	566	-13.8113	900	-6	-0.195041	0.347513	-0.98197	NA
17540077	17540577	AT3G47600	Chr3	17539337	17541230	Yes	NA	Yes	6.04869	9.63306	17537038	17537538	AT3G47590	NA	NA	Yes	0.254876	0.26941	Chr3	17535758	17537530	+	729	+	117	interaction113606	3039	23	0.070444	0	7	0.070444	700	-9.58277	661	84	-13.8006	1600	-20	0.4334	0.0698527	-0.0977445	0.786578
2316475	2316975	AT5G07330	Chr5	2315979	2316874	NA	Yes	Yes	2.32998	1.78978	2312006	2312506	AT5G07320	NA	NA	NA	0.405318	0.362244	Chr5	2309910	2312287	+	1393	+	154	interaction160267	4469	25	0.070444	0	8	0.070444	800	-11.6921	1164	108	-13.8002	1700	-22	1.94299	1.66e-07	-0.0906837	0.816864
3396426	3396926	AT1G10360	Chr1	3395557	3396849	NA	NA	NA	0.499299	0.404205	3395051	3395551	AT1G10350	NA	NA	NA	0.197029	0.329831	Chr1	3393406	3395055	+	1524	+	179	interaction6199	1375	43	0.070444	0	20	0.070444	2000	-45.0074	1500	107	-13.7981	2300	-50	0.0729141	0.802146	-0.140922	0.696317
4377416	4377916	AT3G13440	Chr3	4377096	4379575	NA	NA	Yes	0.201465	0.315962	4375498	4375998	AT3G13435	NA	NA	Yes	3.70513	3.16997	Chr3	4375424	4376069	+	678	+	412	interaction96352	1918	10	0.070444	0.028887	1	0.070444	100	-0.457698	522	298	-13.7939	900	-6	0.075488	0.827956	0.577224	0.107511
13633066	13633566	AT2G32030	Chr2	13632467	13633335	NA	Yes	Yes	5.60336	7.96019	13631458	13631958	AT2G32020	NA	NA	NA	0.43398	0.700941	Chr2	13631061	13631768	+	605	+	202	interaction75212	1608	13	0.070444	1.9e-05	2	0.070444	200	-1.3309	467	165	-13.7911	1100	-8	0.455842	0.376362	0.297922	0.628844
9120496	9120996	AT5G26114	Chr5	9120687	9120960	Yes	NA	Yes	2.53737	4.025	9119100	9119600	AT5G26110	Yes	NA	Yes	1.24356	0.404134	Chr5	9117906	9119826	+	296	+	543	interaction173264	1396	20	0.070444	0	5	0.070444	500	-5.63067	311	526	-13.7865	1500	-16	NA	NA	0.392967	0.0798354
14510957	14511457	AT2G34370	Chr2	14510481	14511891	NA	NA	Yes	0.18905	0.24043	14495579	14496079	AT2G34350	Yes	NA	Yes	5.02104	4.05711	Chr2	14493585	14495802	+	1025	+	303	interaction77695	15378	10	0.070444	0.028121	1	0.070444	100	-0.457787	1362	328	-13.785	900	-6	3.27617	NA	1.28466	0.0241021
17604461	17604961	AT1G47810	Chr1	17603503	17604559	Yes	NA	Yes	0.151819	0.256891	17600464	17600964	AT1G47790	Yes	NA	Yes	11.9655	7.17414	Chr1	17600003	17601173	+	321	+	776	interaction27067	3997	10	0.070444	0.028276	1	0.070444	100	-0.45785	353	777	-13.7787	900	-6	NA	NA	NA	NA
3516546	3517046	AT3G11230	Chr3	3516576	3518385	NA	NA	NA	0.153804	0.262914	3510988	3511488	AT3G11210	NA	Yes	Yes	0.497618	0.920974	Chr3	3510662	3513060	+	990	+	389	interaction95175	5558	10	0.070444	0.028763	1	0.070444	100	-0.457857	794	356	-13.7781	900	-6	0.195914	0.571088	-0.0653246	0.868549
2585425	2585925	AT3G08510	Chr3	2582361	2585851	NA	NA	NA	4.02707	1.51626	2581012	2581512	AT3G08505	NA	NA	NA	0.161989	0.214044	Chr3	2580076	2582129	+	168	+	1199	interaction93010	4413	39	0.070444	0	17	0.070444	1700	-35.4136	131	1339	-13.7709	2200	-44	0.11343	0.664373	-0.6026	0.00583361
12461036	12461536	AT2G29000	Chr2	12460780	12465037	Yes	NA	Yes	0.35749	0.515072	12457002	12457502	AT2G28990	Yes	NA	Yes	7.14856	1.3237	Chr2	12455054	12459541	+	695	+	183	interaction72039	4034	13	0.070444	1.9e-05	2	0.070444	200	-1.3309	657	178	-13.7695	1100	-8	0.482733	0.786922	0.462118	0.143552
21189543	21190043	AT1G56553	Chr1	21189721	21190175	Yes	NA	Yes	0.322969	0.337	21187443	21187943	AT1G56550	Yes	NA	Yes	3.33499	2.37803	Chr1	21185661	21188369	+	90	+	1497	interaction35818	2100	17	0.070444	0	4	0.070444	400	-4.02825	52	1350	-13.7608	1300	-14	1.21356	NA	0.336383	0.34748
3403476	3403976	AT1G10385	Chr1	3403223	3405856	NA	Yes	Yes	3.64687	6.04259	3397099	3397599	AT1G10370	NA	NA	Yes	0.802604	0.937541	Chr1	3397080	3398358	+	371	+	1825	interaction6292	6377	10	0.070444	0.028655	1	0.070444	100	-0.458071	482	1715	-13.7569	900	-6	-0.381808	0.834769	-0.044279	0.89754
9359493	9359993	AT3G25700	Chr3	9358718	9360463	NA	NA	Yes	0.142625	0.211589	9349589	9350089	AT3G25680	NA	NA	NA	0.160458	0.230442	Chr3	9349611	9352427	+	238	+	1185	interaction105869	9904	13	0.070444	2e-05	2	0.070444	200	-1.3309	189	958	-13.7537	1100	-8	-0.195523	0.493199	-0.167135	0.567524
4908944	4909444	AT5G15140	Chr5	4908685	4910799	Yes	NA	Yes	10.8108	9.40142	4905382	4905882	AT5G15130	Yes	NA	Yes	9.34739	9.6097	Chr5	4904346	4907094	+	700	+	974	interaction165025	3562	10	0.070444	0.029742	1	0.070444	100	-0.458145	549	898	-13.7496	900	-6	1.16619	NA	0.328141	0.225017
20746928	20747428	AT5G51020	Chr5	20745348	20747277	NA	Yes	NA	0.336248	0.311587	20744155	20744655	AT5G51010	Yes	NA	Yes	0.24701	0.277953	Chr5	20744565	20745703	+	405	+	873	interaction187270	2773	34	0.070444	0	13	0.070444	1300	-23.7367	262	575	-13.7451	2100	-34	0.037548	0.889747	0.267891	0.0713066
9434468	9434968	AT1G27170	Chr1	9433487	9439417	NA	Yes	Yes	0.269362	0.473755	9428077	9428577	AT1G27140	NA	NA	Yes	0.318902	0.770188	Chr1	9427857	9428716	+	758	+	806	interaction18200	6391	10	0.070444	0.029832	1	0.070444	100	-0.458243	674	750	-13.7399	900	-6	-0.0692597	0.905795	-0.136521	0.866102
174381	174881	AT4G00400	Chr4	174061	176853	NA	NA	Yes	0.133533	0.244749	172541	173041	AT4G00390	NA	NA	Yes	10.8131	11.2556	Chr4	171496	172843	+	81	+	1128	interaction125177	1840	15	0.070444	0	3	0.070444	300	-2.54298	56	1222	-13.7275	1200	-10	-0.0562163	0.893134	1.77707	0.00875108
6427489	6427989	AT3G18680	Chr3	6427402	6429692	NA	NA	NA	0.163566	0.202922	6425591	6426091	AT3G18670	NA	NA	Yes	2.6316	3.02266	Chr3	6424134	6426471	+	131	+	1553	interaction99078	1898	28	0.070444	0	10	0.070444	1000	-16.4092	95	1495	-13.7179	1800	-28	-0.097439	0.678862	-0.515728	0.518781
2316893	2317393	AT5G07340	Chr5	2317212	2319649	NA	Yes	Yes	2.32998	1.78978	2315594	2316094	AT5G07330	NA	Yes	Yes	7.11187	14.3062	Chr5	2315979	2316874	+	1611	+	159	interaction160288	1299	25	0.070444	0	8	0.070444	800	-11.6793	1129	115	-13.7108	1700	-22	-0.144572	0.502308	1.94299	1.66e-07
2636511	2637011	AT1G08360	Chr1	2636010	2637915	NA	NA	NA	0.146499	0.261335	2635482	2635982	AT1G08350	NA	NA	NA	0.173973	0.308652	Chr1	2632809	2635852	+	100	+	1533	interaction5144	1029	23	0.070444	0	7	0.070444	700	-9.57181	89	1341	-13.7035	1600	-20	0.10011	0.628581	-0.190399	0.563904
21976940	21977440	AT5G54148	Chr5	21975784	21977104	NA	NA	Yes	15.8035	23.9503	21972449	21972949	AT5G54145	Yes	NA	Yes	3.05795	1.89162	Chr5	21972464	21973083	+	1403	+	832	interaction190230	4491	24	0.070444	0	7	0.070444	700	-9.41626	1207	685	-13.6949	1700	-22	0.660848	0.541486	0.712938	0.000196776
12673898	12674398	AT4G24540	Chr4	12670964	12674072	Yes	NA	Yes	0.133024	0.242929	12669544	12670044	AT4G24530	NA	NA	Yes	0.238234	0.284837	Chr4	12667357	12670013	+	1198	+	124	interaction145687	4354	25	0.070444	0	8	0.070444	800	-11.676	1137	117	-13.6875	1700	-24	1.20252	1.85e-05	-0.114994	0.752794
11817438	11817938	AT4G22400	Chr4	11816728	11817912	Yes	NA	Yes	0.183301	0.277381	11814903	11815403	AT4G22390	Yes	NA	Yes	9.30271	10.964	Chr4	11813424	11815133	+	164	+	1108	interaction142874	2535	27	0.070444	0	9	0.070444	900	-13.8755	163	890	-13.6773	1800	-26	NA	NA	0.958356	0.0476143
15729918	15730418	AT5G39270	Chr5	15729117	15730150	Yes	NA	Yes	0.144924	0.272185	15726487	15726987	AT5G39260	Yes	NA	Yes	1.41102	0.274661	Chr5	15726377	15727458	+	1540	+	288	interaction178006	3431	44	0.070444	0	20	0.070444	2000	-44.1953	1703	196	-13.6743	2400	-50	NA	NA	-2.52372	NA
17980036	17980536	AT4G38405	Chr4	17980416	17980557	NA	Yes	NA	3.4131	2.49568	17978616	17979116	AT4G38400	NA	NA	Yes	0.208297	0.418884	Chr4	17978442	17979740	+	313	+	251	interaction154414	1420	13	0.070444	2e-05	2	0.070444	200	-1.33089	277	354	-13.6731	1100	-8	NA	NA	1.18529	1.68e-08
14493098	14493598	AT2G34350	Chr2	14493585	14495802	Yes	NA	Yes	3.11988	3.47685	14489503	14490003	AT2G34340	NA	NA	Yes	1.62303	2.08413	Chr2	14488785	14489602	+	1610	+	273	interaction77603	3595	47	0.070444	0	22	0.070444	2200	-50.4286	1745	218	-13.6624	2500	-54	1.28466	0.0241021	0.297497	0.634667
4279494	4279994	AT5G13350	Chr5	4279883	4282287	NA	Yes	Yes	0.295324	0.484783	4272065	4272565	AT5G13330	NA	Yes	Yes	6.1523	9.02127	Chr5	4272059	4274660	+	387	+	1189	interaction164228	7429	13	0.070444	2.2e-05	2	0.070444	200	-1.33089	356	923	-13.6352	1100	-8	1.21356	NA	0.539526	0.104281
15976896	15977396	AT1G42550	Chr1	15977013	15979952	NA	NA	NA	2.04049	2.45715	15973493	15973993	AT1G42540	NA	NA	NA	0.140594	0.232777	Chr1	15973053	15976703	+	493	+	960	interaction25432	3403	13	0.070444	2.3e-05	2	0.070444	200	-1.33089	358	979	-13.6344	1100	-8	0.0554393	0.861061	0.154303	0.438044
4394503	4395003	AT1G12910	Chr1	4394896	4396291	NA	NA	NA	0.206803	0.293935	4389957	4390457	AT1G12880	NA	NA	Yes	0.124354	0.195577	Chr1	4389750	4391151	+	98	+	1811	interaction8674	4546	28	0.070444	0	10	0.070444	1000	-16.3924	99	1824	-13.6333	1800	-28	0.0505908	0.875669	-0.0574894	0.912703
14012107	14012607	AT4G28290	Chr4	14011843	14012583	NA	NA	NA	0.298255	0.383744	14008489	14008989	AT4G28270	NA	NA	NA	0.133019	0.179713	Chr4	14007538	14009019	+	85	+	947	interaction148273	3618	15	0.070444	0	3	0.070444	300	-2.54121	61	709	-13.6229	1200	-10	-0.101215	0.713232	0.0355851	0.930893
21596066	21596566	AT3G58370	Chr3	21595773	21596538	Yes	NA	Yes	4.34348	1.48606	21587920	21588420	AT3G58330	Yes	NA	Yes	4.51421	1.31075	Chr3	21587361	21588002	+	370	+	1343	interaction121758	8146	13	0.070444	2.2e-05	2	0.070444	200	-1.33089	416	1294	-13.6161	1100	-8	NA	NA	1.96386	NA
23844541	23845041	AT5G59060	Chr5	23844300	23844777	NA	Yes	Yes	0.173465	0.251485	23841530	23842030	AT5G59050	NA	NA	Yes	0.29876	0.208959	Chr5	23839156	23842677	+	1797	+	104	interaction193678	3011	19	0.070444	0	5	0.070444	500	-5.71353	1592	63	-13.6137	1400	-16	-1.22577	NA	-0.279781	0.308715
1935926	1936426	AT5G06340	Chr5	1936365	1938114	NA	Yes	NA	0.41205	0.307219	1928440	1928940	AT5G06310	Yes	NA	Yes	0.18689	0.263234	Chr5	1928390	1930951	+	877	+	936	interaction159346	7486	22	0.070444	0	6	0.070444	600	-7.44456	638	738	-13.6118	1600	-18	-0.0281463	0.923175	-0.0107688	0.991102
7443562	7444062	AT5G22460	Chr5	7443507	7445546	NA	NA	Yes	0.170189	0.229965	7439084	7439584	AT5G22450	NA	NA	NA	0.195786	0.258897	Chr5	7437144	7443347	+	2030	+	72	interaction169631	4478	15	0.070444	0	3	0.070444	300	-2.5409	1707	62	-13.6043	1200	-10	-0.267984	0.905606	0.136401	0.563361
119616	120116	AT3G01331	Chr3	119617	119917	Yes	NA	Yes	0.226907	0.311913	115911	116411	AT3G01327	Yes	NA	Yes	2.96009	0.822955	Chr3	116230	116548	+	124	+	1090	interaction88691	3705	17	0.070444	0	4	0.070444	400	-4.02242	57	1364	-13.6042	1300	-12	1.96386	NA	-0.214409	NA
20368420	20368920	AT1G54540	Chr1	20367571	20368434	Yes	NA	Yes	3.8482	1.23872	20363911	20364411	AT1G54520	Yes	NA	Yes	0.344206	0.338615	Chr1	20363447	20366061	+	461	+	1312	interaction33551	4509	13	0.070444	2.3e-05	2	0.070444	200	-1.33089	480	1516	-13.6011	1100	-8	0.0618351	0.886963	0.0189667	0.95515
9073586	9074086	AT3G24860	Chr3	9073622	9074682	NA	NA	NA	0.142367	0.210198	9072056	9072556	AT3G24850	NA	NA	Yes	0.480043	0.66785	Chr3	9071104	9072184	+	731	+	75	interaction105300	1530	15	0.070444	0	3	0.070444	300	-2.54059	646	63	-13.5863	1200	-10	0.1876	0.576251	NA	NA
2693022	2693522	AT5G08370	Chr5	2690878	2693550	NA	NA	Yes	8.88188	6.2335	2689892	2690392	AT5G08360	NA	NA	Yes	4.69558	4.40018	Chr5	2689712	2690974	+	1497	+	1901	interaction161065	3130	116	0.147174	0	77	0.154843	3503.01	-263.377	1588	2041	-13.5722	2049.23	-174	-0.323515	0.12081	-0.270425	0.777332
22755541	22756041	AT1G61660	Chr1	22753714	22756300	Yes	NA	Yes	0.112417	0.218385	22744965	22745465	AT1G61630	Yes	NA	Yes	9.0144	2.08375	Chr1	22744206	22746111	+	776	+	1327	interaction39773	10576	13	0.070444	2.4e-05	2	0.070444	200	-1.33089	727	1238	-13.5681	1100	-8	0.05315	0.895537	1.02261	NA
26447464	26447964	AT1G70220	Chr1	26446135	26448009	NA	NA	Yes	3.48774	1.54154	26431403	26431903	AT1G70190	NA	NA	NA	0.1833	0.300829	Chr1	26430542	26432049	+	1837	+	63	interaction50405	16061	19	0.070444	0	5	0.070444	500	-5.71025	1868	65	-13.5603	1400	-16	0.00815811	NA	0.0514167	0.899001
28543399	28543899	AT1G76060	Chr1	28543099	28543850	NA	NA	Yes	6.78491	4.81286	28542498	28542998	AT1G76050	NA	NA	NA	0.134145	0.256829	Chr1	28540822	28543227	+	972	+	343	interaction54914	901	57	0.070444	0	29	0.070444	2900	-73.601	724	285	-13.5582	2800	-70	0.11613	0.742843	-0.0782196	0.80406
21930457	21930957	AT5G54040	Chr5	21928846	21930637	Yes	NA	Yes	1.96447	0.793902	21916943	21917443	AT5G53990	NA	NA	Yes	1.6	1.02119	Chr5	21915549	21917149	+	1358	+	1653	interaction189940	13514	12	0.116091	0.00029	2	0.132882	106.024	-1.33089	1474	1887	-13.5358	622.13	-8	-0.00861096	0.991102	0.110369	0.833539
17698376	17698876	AT4G37670	Chr4	17696058	17698843	NA	NA	NA	0.159363	0.260359	17695466	17695966	AT4G37660	NA	NA	NA	0.212489	0.339735	Chr4	17695495	17696270	+	98	+	1591	interaction153728	2910	37	0.070444	0	17	0.070444	1700	-36.5386	64	1582	-13.5107	2000	-42	-0.527821	0.0712526	-0.0185226	0.970986
6001442	6001942	AT3G17530	Chr3	6000859	6002282	NA	NA	Yes	3.68409	2.77505	6000120	6000620	AT3G17520	NA	Yes	Yes	4.41522	7.04863	Chr3	5999288	6000370	+	57	+	896	interaction98354	1322	15	0.070444	0	3	0.070444	300	-2.53919	68	886	-13.5052	1200	-12	1.61886	NA	2.69277	0.0112698
12257993	12258493	AT4G23496	Chr4	12257675	12258411	NA	NA	Yes	0.149661	0.24306	12256551	12257051	AT4G23493	NA	NA	Yes	0.401925	0.360415	Chr4	12256179	12257039	+	756	+	580	interaction144527	1442	29	0.070444	0	10	0.070444	1000	-16.1188	677	338	-13.4908	1900	-28	0.270893	0.782619	0.342648	0.407056
16704606	16705106	AT2G40004	Chr2	16704062	16704954	NA	NA	NA	0.140843	0.220251	16701467	16701967	AT2G40000	NA	NA	NA	0.14066	0.250173	Chr2	16700509	16702028	+	1711	+	145	interaction81778	3139	49	0.070444	0	25	0.070444	2500	-61.4574	1639	120	-13.4771	2400	-60	0.932478	NA	0.747514	0.413579
7568115	7568615	AT2G17430	Chr2	7568017	7570840	NA	NA	NA	0.285677	0.484277	7561423	7561923	AT2G17410	NA	NA	NA	0.146295	0.22316	Chr2	7558976	7563752	+	1324	+	74	interaction63187	6692	15	0.070444	0	3	0.070444	300	-2.53869	1675	70	-13.4764	1200	-10	0.358388	0.286142	-0.0670963	0.816772
8407486	8407986	AT1G23780	Chr1	8406685	8408525	NA	NA	Yes	0.259562	0.37482	8406018	8406518	AT1G23770	NA	NA	Yes	11.038	14.208	Chr1	8405213	8406266	+	181	+	1872	interaction16289	1468	42	0.070444	0	19	0.070444	1900	-41.2656	164	1625	-13.456	2300	-48	-0.00680094	0.985365	0.173014	NA
17902548	17903048	AT3G48344	Chr3	17902087	17902255	Yes	NA	Yes	0.143339	0.22268	17898488	17898988	AT3G48340	Yes	NA	Yes	8.02922	5.43034	Chr3	17897738	17899208	+	38	+	1230	interaction114509	4060	12	0.070444	6.5e-05	2	0.070444	200	-1.33107	26	1330	-13.4467	1000	-8	NA	NA	0.271346	0.365895
15616038	15616538	AT4G32342	Chr4	15615183	15616200	NA	NA	Yes	2.44052	2.82107	15613550	15614050	AT4G32340	NA	NA	Yes	0.366997	0.515056	Chr4	15612583	15614305	+	1435	+	345	interaction149941	2488	32	0.070444	0	12	0.070444	1200	-21.1502	1602	233	-13.4191	2000	-32	-0.291967	NA	-0.0346273	0.95515
11261483	11261983	AT2G26470	Chr2	11259152	11262494	NA	NA	NA	0.15809	0.267889	11258628	11259128	AT2G26460	NA	NA	Yes	0.180428	0.271544	Chr2	11254931	11258973	+	150	+	714	interaction69740	2855	23	0.070444	0	7	0.070444	700	-9.5356	111	579	-13.3931	1600	-20	0.156965	0.651409	0.0172667	0.96722
4958943	4959443	AT3G14770	Chr3	4957333	4959704	NA	NA	Yes	4.02237	1.243	4955520	4956020	AT3G14750	NA	NA	NA	0.149903	0.246044	Chr3	4953575	4955656	+	1941	+	146	interaction96960	3423	50	0.070444	0	26	0.070444	2600	-65.6998	1883	96	-13.3917	2400	-62	0.119697	0.743004	-0.0265901	0.962074
9475988	9476488	AT5G26920	Chr5	9475681	9478751	NA	Yes	Yes	0.318792	0.585764	9469530	9470030	AT5G26910	NA	NA	NA	0.155799	0.248708	Chr5	9465928	9470403	+	86	+	1216	interaction173961	6458	17	0.070444	0	4	0.070444	400	-4.01422	66	1256	-13.3906	1300	-14	-0.148042	0.828816	0.405614	0.00719816
15937573	15938073	AT5G39810	Chr5	15937277	15938344	NA	NA	Yes	0.220721	0.282153	15936470	15936970	AT5G39800	NA	NA	Yes	0.129009	0.183308	Chr5	15935463	15937132	+	553	+	89	interaction178687	1103	15	0.070444	0	3	0.070444	300	-2.53714	565	77	-13.3884	1200	-10	-0.835647	NA	-0.0644494	0.905823
25431607	25432107	AT1G67830	Chr1	25431585	25432990	NA	NA	Yes	0.115876	0.224619	25426950	25427450	AT1G67810	NA	Yes	Yes	6.51231	10.6424	Chr1	25426487	25427349	+	86	+	1171	interaction47828	4657	15	0.070444	0	3	0.070444	300	-2.53602	83	1157	-13.3258	1200	-10	-0.093057	0.760394	0.499162	0.180883
7050910	7051410	AT2G16280	Chr2	7050943	7052897	NA	NA	NA	4.22593	1.19989	7039125	7039625	AT2G16240	NA	NA	NA	0.229023	0.134076	Chr2	7039093	7039165	+	96	+	1816	interaction62259	11785	17	0.070444	0	4	0.070444	400	-4.01128	70	1371	-13.3156	1300	-14	0.457451	0.0111138	NA	NA
12432428	12432928	AT2G28950	Chr2	12431340	12433595	NA	NA	NA	0.147899	0.26614	12428437	12428937	AT2G28940	NA	NA	NA	0.163364	0.240608	Chr2	12426709	12428730	+	1133	+	117	interaction71849	3991	15	0.070444	0	3	0.070444	300	-2.53568	1023	85	-13.307	1200	-10	-0.589524	3.03e-07	0.0172805	0.972586
18274037	18274537	AT4G39260	Chr4	18273898	18275079	NA	NA	NA	2.09898	0.949131	18271587	18272087	AT4G39250	NA	NA	Yes	1.16068	1.45433	Chr4	18271456	18271857	+	1589	+	53	interaction154855	2450	24	0.070444	0	9	0.070444	900	-14.8606	1503	28	-13.307	1500	-24	0.0108288	0.975895	-2.29281	NA
8480385	8480885	AT1G23965	Chr1	8480421	8481486	NA	NA	Yes	2.83418	4.08337	8478430	8478930	AT1G23960	NA	NA	NA	0.196463	0.247317	Chr1	8478406	8480316	+	1337	+	142	interaction16445	1955	23	0.070444	0	7	0.070444	700	-9.5236	1013	121	-13.2934	1600	-20	0.060284	NA	0.18462	0.390874
6489454	6489954	AT3G18830	Chr3	6488861	6491273	NA	NA	NA	0.44175	0.460049	6484486	6484986	AT3G18820	NA	Yes	NA	0.251259	0.276245	Chr3	6484067	6486247	+	142	+	1593	interaction99263	4968	28	0.070444	0	10	0.070444	1000	-16.3205	121	1327	-13.2832	1800	-28	0.510743	8.68e-05	0.173537	0.336914
18056932	18057432	AT4G38630	Chr4	18057129	18059540	NA	NA	NA	0.205679	0.285428	18053654	18054154	AT4G38620	NA	Yes	Yes	2.49731	5.41695	Chr4	18053550	18054999	+	102	+	1028	interaction154614	3278	15	0.070444	0	3	0.070444	300	-2.53506	89	815	-13.2723	1200	-10	-0.101845	0.617767	-0.952768	8.2e-07
11902424	11902924	AT4G22610	Chr4	11902104	11902642	Yes	NA	Yes	0.135536	0.224758	11900555	11901055	AT4G22600	NA	NA	Yes	13.0081	17.8591	Chr4	11900210	11901032	+	174	+	1522	interaction143044	1869	19	0.070444	0	5	0.070444	500	-5.69205	79	1519	-13.2721	1400	-16	0.50392	0.0507314	1.3953	NA
11217463	11217963	AT2G26350	Chr2	11217438	11220507	NA	NA	Yes	0.506779	0.451648	11216335	11216835	AT2G26340	NA	NA	NA	0.12104	0.214751	Chr2	11215251	11217033	+	331	+	761	interaction69597	1128	32	0.070444	0	12	0.070444	1200	-21.1073	282	809	-13.2671	2000	-32	0.20613	0.425943	0.0552499	0.835044
26146976	26147476	AT1G69540	Chr1	26145043	26147571	NA	NA	Yes	0.55635	0.658636	26128958	26129458	AT1G69520	NA	NA	NA	0.117273	0.167036	Chr1	26128287	26129602	+	2014	+	101	interaction49217	18018	26	0.070444	0	9	0.070444	900	-14.0219	2124	91	-13.267	1700	-24	-0.381026	0.740723	0.191814	0.780419
21941044	21941544	AT1G59720	Chr1	21939751	21941784	NA	NA	Yes	0.161811	0.307818	21938938	21939438	AT1G59710	NA	NA	Yes	0.367471	0.292854	Chr1	21938366	21940184	+	998	+	313	interaction37433	2106	38	0.070444	0	16	0.070444	1600	-32.084	858	229	-13.2611	2200	-40	-0.12949	0.784125	0.746389	3.39e-05
13798482	13798982	AT2G32510	Chr2	13798820	13799939	NA	NA	NA	2.35448	0.66107	13796914	13797414	AT2G32500	NA	NA	NA	0.199337	0.263294	Chr2	13794425	13797227	+	112	+	1223	interaction75851	1568	19	0.070444	0	5	0.070444	500	-5.691	80	1048	-13.2559	1400	-16	0.492214	0.144024	-0.156302	0.47934
480489	480989	AT1G02390	Chr1	480851	483292	NA	Yes	Yes	9.09137	17.5083	477579	478079	AT1G02380	NA	NA	Yes	0.296773	0.287846	Chr1	476999	478971	+	1362	+	417	interaction900	2910	43	0.070444	0	19	0.070444	1900	-40.6903	1212	389	-13.2551	2400	-48	-0.462408	0.16057	0.99762	0.000132901
18777505	18778005	AT1G50680	Chr1	18777600	18778614	NA	NA	Yes	5.63087	2.38579	18776057	18776557	AT1G50670	NA	NA	NA	0.189331	0.259174	Chr1	18774855	18776959	+	951	+	76	interaction28748	1448	22	0.070444	0	7	0.070444	700	-9.68233	955	56	-13.2533	1500	-20	2.68836	NA	0.0574442	0.841607
19644553	19645053	AT5G48480	Chr5	19644674	19645889	NA	Yes	Yes	2.14207	0.893756	19642044	19642544	AT5G48470	NA	NA	NA	0.160766	0.231675	Chr5	19641743	19644362	+	275	+	1814	interaction185713	2509	33	0.070444	0	13	0.070444	1300	-23.9093	159	1791	-13.2508	2000	-34	0.154679	0.461274	-0.164155	0.600021
599000	599500	AT1G02740	Chr1	599415	602038	NA	NA	NA	0.120349	0.231944	592541	593041	AT1G02720	NA	NA	NA	0.110183	0.224287	Chr1	591825	594236	+	114	+	1898	interaction1393	6459	21	0.070444	0	6	0.070444	600	-7.53747	97	1910	-13.2508	1500	-18	0.150831	0.6989	-0.324995	0.145347
19646419	19646919	AT5G48485	Chr5	19646231	19646802	NA	NA	Yes	0.333665	0.532042	19645027	19645527	AT5G48480	NA	Yes	Yes	0.840065	1.33029	Chr5	19644674	19645889	+	588	+	1350	interaction185756	1392	46	0.070444	0	21	0.070444	2100	-46.7943	421	1224	-13.2505	2500	-52	0.979767	5.74e-08	0.154679	0.461274
13605911	13606411	AT4G27130	Chr4	13604557	13606448	NA	Yes	Yes	0.107476	0.216458	13601585	13602085	AT4G27120	NA	NA	NA	0.155096	0.26567	Chr4	13601969	13604427	+	107	+	665	interaction147311	4326	15	0.070444	0	3	0.070444	300	-2.53462	92	687	-13.2484	1200	-10	0.195695	0.382812	0.0369296	0.90966
3566959	3567459	AT5G11200	Chr5	3567173	3571015	NA	NA	NA	0.136576	0.224575	3565926	3566426	AT5G11190	Yes	NA	Yes	7.68316	8.30125	Chr5	3564975	3566051	+	154	+	1347	interaction162936	1033	35	0.070444	0	15	0.070444	1500	-30.0319	82	1432	-13.2468	2000	-38	-0.0650468	0.800813	-0.508128	0.62779
7357005	7357505	AT3G20980	Chr3	7355962	7357966	Yes	NA	Yes	0.118181	0.241551	7354031	7354531	AT3G20978	NA	NA	Yes	13.709	8.53315	Chr3	7353906	7355339	+	1019	+	183	interaction100624	2974	36	0.070444	0	15	0.070444	1500	-29.4269	1163	160	-13.2436	2100	-38	NA	NA	NA	NA
15328944	15329444	AT2G36560	Chr2	15329142	15332447	Yes	NA	Yes	3.69679	7.26009	15328189	15328689	AT2G36550	Yes	NA	Yes	1.53581	0.742775	Chr2	15327478	15328802	+	114	+	1049	interaction79567	755	26	0.070444	0	9	0.070444	900	-14.0146	93	1001	-13.2261	1700	-24	1.33229	NA	NA	NA
21910018	21910518	AT3G59280	Chr3	21908912	21910722	NA	NA	Yes	0.131121	0.215262	21904038	21904538	AT3G59260	Yes	NA	Yes	1.81885	0.704775	Chr3	21903838	21905188	+	115	+	1502	interaction122802	5980	21	0.070444	0	6	0.070444	600	-7.53411	100	1714	-13.2145	1500	-18	0.0794877	0.787442	1.91272	NA
17230562	17231062	AT2G41342	Chr2	17230532	17231037	NA	NA	NA	1.06031	0.902473	17228876	17229376	AT2G41340	NA	NA	NA	0.138647	0.210906	Chr2	17229007	17230482	+	146	+	1815	interaction83168	1686	42	0.070444	0	20	0.070444	2000	-44.957	110	1866	-13.2	2200	-48	0.0345213	0.980899	-0.120666	0.850837
25562470	25562970	AT5G63870	Chr5	25561159	25563274	NA	NA	NA	10.5177	6.72974	25559474	25559974	AT5G63860	NA	NA	NA	0.126797	0.234947	Chr5	25554507	25559499	+	96	+	334	interaction196667	2996	15	0.070444	0	3	0.070444	300	-2.53371	99	259	-13.1986	1200	-10	-0.0199466	0.95515	0.0409654	0.881915
15423003	15423503	AT4G31880	Chr4	15419081	15424265	NA	NA	NA	16.2957	9.97713	15411997	15412497	AT4G31875	NA	NA	Yes	0.809764	0.43708	Chr4	15411700	15412289	+	73	+	1415	interaction149871	11006	19	0.070444	0	5	0.070444	500	-5.68706	84	1375	-13.1954	1400	-16	-0.0507672	0.856281	0.285133	0.699095
16814472	16814972	AT2G40250	Chr2	16813329	16815251	NA	Yes	Yes	0.330924	0.574767	16803477	16803977	AT2G40230	NA	NA	NA	0.197472	0.273064	Chr2	16803091	16804741	+	1528	+	142	interaction81915	10995	23	0.070444	0	7	0.070444	700	-9.50985	1445	135	-13.1811	1600	-20	-0.421205	NA	0.449739	0.0377512
25405983	25406483	AT1G67760	Chr1	25405579	25406372	NA	Yes	Yes	1.84835	1.02506	25389498	25389998	AT1G67720	NA	NA	Yes	0.204597	0.230125	Chr1	25386340	25391073	+	1938	+	70	interaction47697	16485	15	0.070444	0	3	0.070444	300	-2.53336	1704	102	-13.1795	1200	-10	-0.117473	0.935258	-0.339141	0.0902355
19115525	19116025	AT1G51540	Chr1	19115560	19117534	NA	NA	NA	5.24799	3.14792	19113053	19113553	AT1G51538	NA	NA	Yes	0.564895	0.88352	Chr1	19113182	19115273	+	139	+	929	interaction30064	2472	23	0.070444	0	7	0.070444	700	-9.50897	136	844	-13.1741	1600	-20	-0.0723639	0.83003	-0.50161	0.810836
5764479	5764979	AT5G17490	Chr5	5764062	5766077	NA	NA	Yes	2.55413	2.10447	5759447	5759947	AT5G17460	NA	NA	Yes	0.683157	0.730207	Chr5	5757097	5759795	+	113	+	846	interaction165982	5032	15	0.070444	0	3	0.070444	300	-2.53303	105	770	-13.1616	1200	-10	1.95222	7.06e-16	0.285248	0.610531
3841542	3842042	AT1G11410	Chr1	3841285	3844432	NA	NA	NA	0.123649	0.206838	3824546	3825046	AT1G11362	NA	NA	Yes	1.08557	0.901237	Chr1	3824509	3825196	+	921	+	1506	interaction7060	16996	11	0.071732	0.003069	2	0.086573	162.739	-1.33089	1299	1395	-13.1573	917.507	-6	-0.00569446	0.988113	0.142014	NA
12477993	12478493	AT2G29050	Chr2	12478145	12480372	NA	NA	NA	0.266411	0.302463	12476934	12477434	AT2G29045	NA	NA	Yes	1.60668	0.965983	Chr2	12476371	12477107	+	1209	+	198	interaction72117	1059	30	0.070444	0	11	0.070444	1100	-18.6478	1056	200	-13.1311	1900	-30	-0.27751	0.223064	NA	NA
9428044	9428544	AT1G27140	Chr1	9427857	9428716	NA	NA	Yes	0.318902	0.770188	9425542	9426042	AT1G27130	NA	NA	Yes	0.168426	0.289273	Chr1	9425459	9426886	+	806	+	1240	interaction18148	2502	74	0.070444	0	41	0.070444	4100	-116.071	750	1146	-13.1241	3300	-98	-0.136521	0.866102	0.449537	0.00238139
2971634	2972134	AT3G09690	Chr3	2971872	2974843	NA	NA	NA	7.02785	4.50195	2970161	2970661	AT3G09680	NA	NA	Yes	3.48128	4.49852	Chr3	2969044	2970371	+	85	+	573	interaction93834	1473	17	0.070444	0	4	0.070444	400	-4.00321	84	562	-13.1154	1300	-14	-0.197252	0.437124	-0.457285	0.694761
14663119	14663619	AT4G29970	Chr4	14662764	14663917	NA	NA	Yes	16.062	27.0346	14661964	14662464	AT4G29960	NA	NA	Yes	0.187727	0.258936	Chr4	14660566	14662403	+	1953	+	149	interaction149177	1155	67	0.070444	0	40	0.070444	4000	-117.451	1714	135	-13.114	2700	-92	NA	NA	0.105483	0.690442
13019491	13019991	AT2G30570	Chr2	13019027	13020194	NA	NA	NA	1.5455	2.00439	13018456	13018956	AT2G30560	NA	NA	NA	0.29672	0.322576	Chr2	13017346	13018857	+	142	+	662	interaction73818	1035	31	0.070444	0	12	0.070444	1200	-21.3676	125	604	-13.1057	1900	-32	0.0676261	0.772328	0.550928	NA
22562368	22562868	AT3G60972	Chr3	22561915	22562576	NA	NA	NA	1.30218	1.61976	22560512	22561012	AT3G60970	NA	NA	Yes	0.0807587	0.178139	Chr3	22557534	22561716	+	561	+	104	interaction123812	1856	17	0.070444	0	4	0.070444	400	-4.00274	611	85	-13.1039	1300	-14	-0.486538	NA	-1.1828	NA
22371533	22372033	AT1G60780	Chr1	22368952	22372159	Yes	NA	Yes	0.26171	0.372876	22368096	22368596	AT1G60770	NA	NA	NA	0.157497	0.283415	Chr1	22366700	22368714	+	1946	+	128	interaction38430	3437	37	0.070444	0	16	0.070444	1600	-32.4219	1683	136	-13.0845	2100	-40	-0.0872673	0.682032	-0.322666	0.0666103
5242949	5243449	AT1G15230	Chr1	5242197	5243227	NA	NA	NA	0.135287	0.292269	5237926	5238426	AT1G15215	NA	NA	NA	0.1226	0.203299	Chr1	5238064	5240051	+	156	+	630	interaction10557	5023	15	0.070444	0	3	0.070444	300	-2.53124	125	487	-13.0653	1200	-10	0.121241	0.652883	-0.159322	0.705346
7301597	7302097	AT4G12280	Chr4	7301768	7302994	NA	NA	Yes	0.178022	0.279039	7298541	7299041	AT4G12270	NA	NA	Yes	4.75347	8.83947	Chr4	7297807	7299930	+	289	+	142	interaction132696	3056	15	0.070444	0	3	0.070444	300	-2.53124	170	125	-13.0653	1200	-10	NA	NA	0.681014	0.213641
17717412	17717912	AT5G44030	Chr5	17714644	17719723	NA	NA	NA	0.143644	0.253738	17711989	17712489	AT5G44020	Yes	NA	Yes	3.91813	2.4114	Chr5	17712408	17714336	+	105	+	1029	interaction181954	5423	17	0.070444	0	4	0.070444	400	-4.00096	89	991	-13.0606	1300	-14	-0.355274	0.120962	0.874353	0.00035248
13827053	13827553	AT2G32580	Chr2	13827435	13829317	NA	NA	NA	1.54772	1.18635	13819606	13820106	AT2G32550	Yes	NA	Yes	2.37167	1.65894	Chr2	13819378	13822839	+	127	+	1775	interaction75977	7447	15	0.070444	0	3	0.070444	300	-2.53109	127	1552	-13.0574	1200	-10	0.120804	0.59824	0.626507	0.022375
20081964	20082464	AT1G53800	Chr1	20081698	20084500	NA	NA	Yes	3.69115	5.65769	20080611	20081111	AT1G53790	NA	NA	Yes	3.24216	4.21104	Chr1	20079080	20081455	+	39	+	1662	interaction32852	1353	9	0.070444	0.140629	1	0.070444	100	-0.441278	17	2113	-13.049	800	-4	0.0503058	0.880851	0.0959943	0.863605
22124090	22124590	AT5G54500	Chr5	22124510	22126504	NA	NA	Yes	0.135638	0.23346	22118905	22119405	AT5G54480	Yes	NA	Yes	4.76989	2.60142	Chr5	22118003	22120166	+	47	+	1614	interaction190622	5185	9	0.070444	0.162184	1	0.070444	100	-0.441278	17	1429	-13.049	800	-4	0.394767	0.0362896	NA	NA
4518390	4518890	AT3G13760	Chr3	4517516	4519475	NA	Yes	Yes	0.199318	0.30387	4504540	4505040	AT3G13740	NA	NA	NA	0.14993	0.236414	Chr3	4504269	4506311	+	920	+	139	interaction96500	13850	15	0.070444	0	3	0.070444	300	-2.53088	1132	130	-13.0461	1200	-10	0.275709	0.599885	0.0944529	0.724198
8981602	8982102	AT2G20870	Chr2	8981987	8982712	NA	Yes	Yes	9.30271	10.964	8979642	8980142	AT2G20860	NA	NA	NA	0.245703	0.364586	Chr2	8979578	8981226	+	646	+	172	interaction65906	1960	15	0.070444	0	3	0.070444	300	-2.53055	535	135	-13.0284	1200	-10	1.37731	0.0026712	-0.0359669	0.903109
21714019	21714519	AT1G58440	Chr1	21713841	21717290	NA	NA	NA	1.01883	2.43103	21712462	21712962	AT1G58430	NA	NA	Yes	0.260461	0.307866	Chr1	21711564	21713103	+	78	+	1356	interaction36805	1557	16	0.070444	0	4	0.070444	400	-4.09204	27	1545	-13.0224	1200	-12	0.157581	0.424202	-0.386721	0.792822
11447932	11448432	AT2G26840	Chr2	11447196	11448949	Yes	NA	Yes	6.97279	11.9081	11443483	11443983	AT2G26830	NA	NA	Yes	0.22375	0.33964	Chr2	11443560	11447171	+	741	+	128	interaction69874	4449	21	0.070444	0	6	0.070444	600	-7.51537	821	121	-13.0161	1500	-18	-0.15156	0.711934	0.175651	0.566437
19252448	19252948	AT1G51850	Chr1	19252846	19256783	Yes	NA	Yes	0.124722	0.22612	19250461	19250961	AT1G51840	Yes	NA	Yes	5.79968	1.94792	Chr1	19249448	19250709	+	155	+	1758	interaction30545	1987	23	0.070444	0	7	0.070444	700	-9.48896	164	1830	-13.0143	1600	-20	0.179232	0.523659	0.0406503	0.950046
18527630	18528130	AT4G39952	Chr4	18527679	18530007	NA	Yes	NA	5.15186	5.53201	18526881	18527381	AT4G39950	NA	Yes	Yes	9.38463	22.9655	Chr4	18525245	18527579	+	1718	+	179	interaction155575	749	28	0.070444	0	10	0.070444	1000	-16.2623	1661	148	-13.0126	1800	-26	-0.210097	0.808729	0.186045	0.508979
15731443	15731943	AT5G39280	Chr5	15730712	15731706	Yes	NA	Yes	0.330792	0.278449	15729534	15730034	AT5G39270	Yes	NA	Yes	4.84641	3.15853	Chr5	15729117	15730150	+	292	+	951	interaction178026	1909	15	0.070444	0	3	0.070444	300	-2.53018	141	988	-13.0089	1200	-10	NA	NA	NA	NA
1132063	1132563	AT2G03720	Chr2	1132169	1133379	Yes	NA	Yes	1.5665	2.83703	1129943	1130443	AT2G03710	Yes	NA	Yes	5.94688	3.46387	Chr2	1129267	1131838	+	973	+	1164	interaction59875	2120	66	0.070444	0	35	0.070444	3500	-93.7106	944	1111	-13.007	3100	-84	0.204111	0.662216	1.223	1.01e-15
23333012	23333512	AT1G62980	Chr1	23331675	23333110	NA	NA	Yes	7.28688	5.25345	23328633	23329133	AT1G62975	Yes	NA	Yes	2.27908	0.536459	Chr1	23328849	23330776	+	263	+	827	interaction40926	4379	25	0.070444	0	8	0.070444	800	-11.5725	257	710	-13.0059	1700	-22	0.0105237	0.985028	0.666193	0.000646252
13455032	13455532	AT1G36060	Chr1	13454495	13456331	Yes	NA	Yes	2.2997	2.27055	13453441	13453941	AT1G36050	NA	NA	NA	0.170789	0.255246	Chr1	13450203	13453683	+	1046	+	84	interaction25379	1591	36	0.070444	0	17	0.070444	1700	-36.654	990	61	-12.9951	1900	-40	0.421315	0.113625	0.0719059	0.792822
17995964	17996464	AT2G43310	Chr2	17995900	17996688	NA	NA	NA	0.429649	0.789153	17989987	17990487	AT2G43280	NA	NA	Yes	0.319362	0.433131	Chr2	17989697	17991022	+	120	+	1270	interaction85317	5977	17	0.070444	0	4	0.070444	400	-3.99821	96	1067	-12.9945	1300	-12	0.079362	0.938024	0.129702	0.731068
1223469	1223969	AT3G04540	Chr3	1223250	1223714	NA	NA	Yes	0.201464	0.301287	1222393	1222893	AT3G04530	NA	NA	Yes	6.36302	9.49995	Chr3	1221545	1222655	+	1718	+	687	interaction90817	1076	32	0.070444	0	12	0.070444	1200	-21.028	1844	465	-12.994	2000	-32	1.96386	NA	0.465041	0.30637
13829030	13829530	AT4G27710	Chr4	13828431	13830596	NA	NA	NA	12.0373	12.5654	13825425	13825925	AT4G27690	NA	NA	NA	0.130522	0.228601	Chr4	13823587	13826395	+	1822	+	120	interaction147869	3605	21	0.070444	0	6	0.070444	600	-7.51253	1746	125	-12.9865	1500	-18	0.109101	0.694754	-0.054489	0.916108
394452	394952	AT3G02160	Chr3	394069	395984	NA	Yes	NA	2.34818	1.43567	384104	384604	AT3G02130	NA	NA	NA	0.121145	0.212703	Chr3	380725	384405	+	1221	+	142	interaction89777	10348	17	0.070444	0	4	0.070444	400	-3.99785	1169	97	-12.9859	1300	-12	-0.0425254	0.949166	0.405472	0.0393571
3436006	3436506	AT3G10970	Chr3	3433072	3436279	NA	NA	NA	0.13073	0.170512	3426481	3426981	AT3G10960	NA	NA	Yes	2.33309	1.73781	Chr3	3424812	3426997	+	197	+	1832	interaction94940	9525	15	0.070444	0	3	0.070444	300	-2.52953	153	1406	-12.9747	1200	-10	0.127971	0.523659	0.184844	0.585794
7321961	7322461	AT4G12340	Chr4	7321277	7322477	NA	NA	Yes	0.129141	0.198433	7304912	7305412	AT4G12290	NA	Yes	Yes	1.20362	2.5307	Chr4	7304404	7307138	+	190	+	1516	interaction132940	17049	15	0.070444	0	3	0.070444	300	-2.52953	153	1242	-12.9747	1200	-10	0.284143	0.0897264	0.371451	0.285515
10805393	10805893	AT2G25360	Chr2	10804248	10805761	Yes	NA	Yes	5.24038	10.0941	10801080	10801580	AT2G25355	Yes	NA	Yes	0.490751	0.292202	Chr2	10801277	10803722	+	1802	+	1016	interaction68984	4313	66	0.094684	0	37	0.098137	2655.89	-100.96	2109	974	-12.9641	2254.43	-84	1.61886	NA	0.0611123	0.918452
12588450	12588950	AT2G29300	Chr2	12588190	12589759	NA	NA	NA	0.158729	0.208027	12586494	12586994	AT2G29290	NA	NA	NA	1.01289	0.602416	Chr2	12585855	12587742	+	1680	+	48	interaction72417	1956	12	0.070444	9.5e-05	2	0.070444	200	-1.331	1728	34	-12.9623	1000	-8	0.82087	0.00011988	0.351123	0.128473
24775041	24775541	AT5G61640	Chr5	24775034	24776390	Yes	NA	Yes	2.59508	0.473825	24769984	24770484	AT5G61610	NA	NA	Yes	3.47128	3.46912	Chr5	24770098	24771252	+	1599	+	116	interaction195410	5057	26	0.070444	0	9	0.070444	900	-13.9665	1147	109	-12.9612	1700	-24	0.683597	0.000175902	0.758342	NA
986002	986502	AT1G03880	Chr1	985750	988146	NA	NA	Yes	7.35111	9.31821	983061	983561	AT1G03870	NA	Yes	Yes	2.27582	4.31382	Chr1	982505	983540	+	156	+	1968	interaction2345	2941	23	0.070444	0	7	0.070444	700	-9.48186	177	1667	-12.9585	1600	-20	1.33722	0.655488	0.862633	0.000297416
1753028	1753528	AT3G05870	Chr3	1753466	1755631	NA	NA	Yes	2.94171	2.28083	1751615	1752115	AT3G05860	Yes	NA	Yes	5.75447	2.99285	Chr3	1751405	1752355	+	248	+	1054	interaction91607	1413	40	0.070444	0	18	0.070444	1800	-38.2426	158	877	-12.9553	2200	-44	0.109823	0.862207	1.02164	0.37043
11253467	11253967	AT2G26450	Chr2	11251119	11253612	NA	Yes	Yes	0.156451	0.283568	11247888	11248388	AT2G26440	NA	NA	Yes	1.3408	1.74872	Chr2	11247382	11249493	+	99	+	1146	interaction69664	5579	17	0.070444	0	4	0.070444	400	-3.99648	101	950	-12.9533	1300	-14	0.330144	NA	-0.102361	0.907813
8761865	8762365	AT3G24220	Chr3	8761433	8763172	NA	Yes	Yes	0.243559	0.313998	8752984	8753484	AT3G24210	NA	NA	Yes	0.328107	0.443445	Chr3	8753473	8756065	+	1515	+	130	interaction104492	8881	17	0.070444	0	4	0.070444	400	-3.99648	1111	101	-12.9533	1300	-12	1.21356	NA	-0.122915	0.832402
9440953	9441453	AT1G27180	Chr1	9439858	9446106	NA	NA	Yes	0.179599	0.277149	9434432	9434932	AT1G27170	NA	Yes	Yes	0.269362	0.473755	Chr1	9433487	9439417	+	852	+	758	interaction18253	6521	27	0.070444	0	9	0.070444	900	-13.7399	797	674	-12.9485	1800	-24	-0.0763859	0.890402	-0.0692597	0.905795
6747046	6747546	AT4G11050	Chr4	6747466	6751311	Yes	NA	Yes	3.3336	4.08307	6746087	6746587	AT4G11040	NA	NA	Yes	7.73621	12.7954	Chr4	6745099	6746944	+	117	+	1025	interaction131340	959	19	0.070444	0	5	0.070444	500	-5.67023	107	833	-12.9438	1400	-16	-0.0607726	0.939816	2.03467	NA
15053945	15054445	AT2G35840	Chr2	15053622	15057426	NA	Yes	NA	3.04688	4.19927	15052955	15053455	AT2G35830	NA	Yes	Yes	2.41272	3.01651	Chr2	15052198	15053275	+	785	+	1903	interaction78853	990	103	0.077257	0	57	0.070444	5700	-179.827	649	1748	-12.931	3691.68	-150	-0.110622	0.562237	0.212256	0.198036
150980	151480	AT1G01400	Chr1	150688	152210	NA	NA	Yes	1.66035	2.42253	149537	150037	AT1G01390	NA	NA	Yes	2.62159	4.73312	Chr1	148119	149806	+	482	+	1517	interaction302	1443	53	0.070444	0	26	0.070444	2600	-62.7776	552	1453	-12.9301	2700	-64	NA	NA	-0.84006	0.00120139
24656981	24657481	AT5G61330	Chr5	24657147	24661021	NA	NA	Yes	4.79048	2.79398	24655929	24656429	AT5G61320	NA	NA	Yes	0.274648	0.597513	Chr5	24655097	24656638	+	369	+	1135	interaction195286	1052	54	0.070444	0	27	0.070444	2700	-66.3745	391	1150	-12.9207	2700	-66	0.108907	0.685958	-1.55316	NA
20890465	20890965	AT5G51430	Chr5	20886837	20890907	NA	NA	Yes	2.48794	4.89169	20883513	20884013	AT5G51410	NA	NA	NA	0.163061	0.278028	Chr5	20880740	20883908	+	1784	+	49	interaction187337	6952	12	0.070444	9.7e-05	2	0.070444	200	-1.33099	1482	35	-12.9201	1000	-8	-0.20596	0.204316	0.0105146	0.975482
18526501	18527001	AT4G39950	Chr4	18525245	18527579	NA	Yes	Yes	0.167831	0.236908	18520812	18521312	AT4G39940	NA	NA	Yes	3.01262	3.67645	Chr4	18519716	18521568	+	237	+	912	interaction155552	5689	15	0.070444	0	3	0.070444	300	-2.52842	179	897	-12.9169	1200	-10	0.186045	0.508979	0.210914	0.265504
6561559	6562059	AT3G19020	Chr3	6558972	6562119	NA	NA	NA	0.745999	0.885309	6555470	6555970	AT3G19002	NA	NA	Yes	0.864214	1.5349	Chr3	6554530	6555657	+	135	+	1072	interaction99620	6089	17	0.070444	0	4	0.070444	400	-3.99492	106	985	-12.9163	1300	-12	0.477407	0.796944	-0.497898	0.675999
19007101	19007601	AT1G51270	Chr1	19007509	19011272	Yes	NA	Yes	0.438737	0.281924	19004960	19005460	AT1G51260	Yes	NA	Yes	5.89107	1.1874	Chr1	19003375	19005641	+	319	+	1088	interaction29453	2141	15	0.070444	0	3	0.070444	300	-2.52811	188	1448	-12.9007	1200	-10	3.15025	2.12e-87	1.29301	0.215232
4371431	4371931	AT3G13432	Chr3	4371469	4371987	NA	NA	Yes	1.16886	2.22213	4367135	4367635	AT3G13430	NA	NA	Yes	0.302584	0.312211	Chr3	4367180	4368879	+	236	+	839	interaction96250	4296	15	0.070444	0	3	0.070444	300	-2.52789	195	631	-12.8892	1200	-10	0.717946	0.508474	0.414396	0.118695
9479419	9479919	AT5G26930	Chr5	9479465	9480200	NA	NA	Yes	0.243812	0.458016	9469497	9469997	AT5G26910	NA	NA	NA	0.155799	0.248708	Chr5	9465928	9470403	+	132	+	1216	interaction173969	9922	19	0.070444	0	5	0.070444	500	-5.66649	114	1256	-12.8892	1400	-16	0.734086	0.718288	0.405614	0.00719816
5720389	5720889	AT5G17360	Chr5	5720375	5721659	NA	NA	NA	11.1379	7.46172	5719394	5719894	AT5G17350	NA	NA	Yes	1.02284	0.726656	Chr5	5718771	5719608	+	144	+	1336	interaction165744	995	35	0.070444	0	15	0.070444	1500	-29.6861	113	1322	-12.8888	2000	-38	0.0190357	0.983167	0.176945	0.711434
22052023	22052523	AT3G59700	Chr3	22052132	22054275	NA	NA	NA	0.121643	0.232485	22049067	22049567	AT3G59690	NA	NA	Yes	0.169597	0.22782	Chr3	22048753	22051673	+	262	+	336	interaction122998	2956	15	0.070444	0	3	0.070444	300	-2.52733	258	215	-12.8607	1200	-10	0.0118164	0.988113	-0.0876026	0.840349
15332884	15333384	AT5G38360	Chr5	15331710	15333625	NA	NA	Yes	7.46583	6.30925	15328614	15329114	AT5G38350	Yes	NA	Yes	2.41884	0.937933	Chr5	15328658	15331528	+	41	+	1073	interaction176537	4270	9	0.070444	0.146626	1	0.070444	100	-0.443136	19	1184	-12.8479	800	-4	-0.210854	0.536915	0.471742	0.291547
7919023	7919523	AT1G22430	Chr1	7919143	7921832	NA	NA	Yes	0.625856	0.640061	7916949	7917449	AT1G22420	NA	NA	Yes	3.86897	5.49975	Chr1	7916075	7917518	+	736	+	115	interaction15320	2074	21	0.070444	0	6	0.070444	600	-7.49597	559	155	-12.8171	1500	-18	0.0661309	0.799532	NA	NA
2270550	2271050	AT5G07230	Chr5	2270964	2271610	Yes	NA	Yes	0.453381	0.411523	2269557	2270057	AT5G07225	Yes	NA	Yes	2.00095	1.04892	Chr5	2268641	2270227	+	479	+	608	interaction160191	993	35	0.070444	0	14	0.070444	1400	-26.3017	443	491	-12.8169	2100	-36	NA	NA	NA	NA
14151528	14152028	AT2G33390	Chr2	14151134	14153118	NA	NA	NA	0.208652	0.27223	14146346	14146846	AT2G33380	NA	NA	Yes	0.979018	0.839921	Chr2	14144830	14146471	+	160	+	1299	interaction76921	5182	17	0.070444	0	4	0.070444	400	-3.99058	123	958	-12.8147	1300	-12	0.383713	0.0535585	0.176823	0.531292
24853535	24854035	AT5G61890	Chr5	24852638	24853910	NA	NA	Yes	0.252238	0.341148	24850529	24851029	AT5G61880	NA	NA	Yes	0.92909	0.63617	Chr5	24850256	24851776	+	789	+	110	interaction195553	3006	22	0.070444	0	7	0.070444	700	-9.62918	767	68	-12.8028	1500	-20	1.0291	0.376945	0.180934	0.602738
18876051	18876551	AT2G45870	Chr2	18875893	18877477	NA	NA	Yes	2.89305	2.99651	18873571	18874071	AT2G45850	NA	NA	Yes	0.250195	0.265866	Chr2	18871478	18873972	+	180	+	1081	interaction86933	2480	21	0.070444	0	6	0.070444	600	-7.49424	159	852	-12.7997	1500	-18	-0.126675	0.826609	0.0855403	0.794254
8500918	8501418	AT1G24020	Chr1	8500399	8502065	Yes	NA	Yes	4.34035	1.67989	8498606	8499106	AT1G24010	Yes	NA	Yes	7.82847	3.32237	Chr1	8498802	8499499	+	729	+	285	interaction16622	2312	15	0.070444	0	3	0.070444	300	-2.52594	778	290	-12.7894	1200	-10	-0.668771	0.391499	2.68836	NA
17816872	17817372	AT5G44240	Chr5	17817027	17823708	NA	NA	NA	1.57972	1.2379	17814196	17814696	AT5G44230	NA	NA	NA	0.180377	0.239172	Chr5	17814335	17816309	+	157	+	776	interaction182119	2676	19	0.070444	0	5	0.070444	500	-5.65946	130	544	-12.7882	1400	-16	-0.202165	0.268461	-0.140211	0.78545
7815031	7815531	AT1G22140	Chr1	7814762	7815631	NA	NA	Yes	0.755051	0.283121	7813523	7814023	AT1G22130	NA	NA	Yes	1.60589	0.358114	Chr1	7812386	7814264	+	1119	+	496	interaction14936	1508	47	0.070444	0	22	0.070444	2200	-49.8745	873	478	-12.7844	2500	-54	0.547928	0.000199229	1.29618	0.573978
12624949	12625449	AT2G29450	Chr2	12624585	12625637	NA	NA	NA	0.228194	0.263974	12620040	12620540	AT2G29440	Yes	NA	Yes	2.49058	1.00461	Chr2	12620059	12621148	+	166	+	1376	interaction72607	4909	17	0.070444	0	4	0.070444	400	-3.98765	138	1214	-12.747	1300	-12	0.565233	7.69e-07	0.495431	0.0420538
2125043	2125543	AT1G06920	Chr1	2124853	2125801	NA	NA	Yes	0.396038	0.717884	2123564	2124064	AT1G06910	NA	NA	NA	0.13066	0.235026	Chr1	2120990	2123748	+	902	+	42	interaction4436	1479	17	0.070444	0	5	0.070444	500	-5.89778	997	24	-12.7451	1200	-14	-3.16665	NA	0.114223	0.820187
27878557	27879057	AT1G74140	Chr1	27876904	27879780	NA	NA	Yes	0.394306	0.37004	27872958	27873458	AT1G74120	NA	NA	Yes	0.167457	0.314835	Chr1	27871273	27873260	+	163	+	1907	interaction53241	5599	21	0.070444	0	6	0.070444	600	-7.48744	177	1681	-12.7317	1500	-18	NA	NA	0.0177048	0.976541
1963419	1963919	AT4G04080	Chr4	1963357	1964423	Yes	NA	Yes	0.138735	0.226739	1939052	1939552	AT4G04040	NA	NA	NA	0.103352	0.220245	Chr4	1939249	1942954	+	1234	+	66	interaction128268	24367	12	0.070444	0.000136	2	0.070444	200	-1.33096	1475	41	-12.7163	1000	-8	NA	NA	-0.00510212	0.988206
23488099	23488599	AT5G58030	Chr5	23486776	23488620	NA	NA	NA	0.164837	0.252482	23485559	23486059	AT5G58020	NA	NA	NA	0.18321	0.339408	Chr5	23485499	23486818	+	291	+	1673	interaction193185	2540	62	0.070444	0	34	0.070444	3400	-91.8604	241	1433	-12.6963	2800	-80	0.0470072	0.89305	0.0743589	0.784125
9531992	9532492	AT5G27090	Chr5	9531844	9532408	NA	NA	Yes	0.247921	0.354665	9530996	9531496	AT5G27080	NA	NA	Yes	0.271536	0.37972	Chr5	9529602	9531081	+	1172	+	904	interaction174078	996	60	0.070444	0	31	0.070444	3100	-79.5727	1090	861	-12.6951	2900	-74	NA	NA	NA	NA
16174067	16174567	AT5G40420	Chr5	16173392	16174783	Yes	NA	Yes	0.153448	0.227894	16172075	16172575	AT5G40410	NA	NA	NA	0.171638	0.268039	Chr5	16171373	16173226	+	628	+	113	interaction179609	1992	19	0.070444	0	5	0.070444	500	-5.65282	468	150	-12.6941	1400	-16	2.31621	1.2e-11	-0.143385	0.936444
23738914	23739414	AT5G58782	Chr5	23738146	23739468	NA	NA	Yes	0.424214	0.467025	23737029	23737529	AT5G58780	NA	NA	Yes	0.106028	0.221366	Chr5	23735628	23737335	+	1106	+	340	interaction193401	1885	33	0.070444	0	13	0.070444	1300	-23.728	1312	271	-12.6904	2000	-34	-1.55316	NA	-0.272348	0.617298
9425513	9426013	AT1G27130	Chr1	9425459	9426886	NA	NA	Yes	0.168426	0.289273	9421087	9421587	AT1G27120	NA	NA	NA	0.147957	0.226998	Chr1	9421176	9424069	+	1240	+	104	interaction18109	4426	22	0.070444	0	7	0.070444	700	-9.60933	1146	74	-12.6428	1500	-20	0.449537	0.00238139	-0.602481	0.000575271
1829010	1829510	AT1G06040	Chr1	1828412	1829890	NA	NA	NA	0.177297	0.307202	1827414	1827914	AT1G06030	NA	NA	Yes	0.136253	0.253425	Chr1	1826879	1828161	+	1902	+	1733	interaction4105	1596	124	0.170465	0	77	0.164226	3302.87	-263.186	1771	1941	-12.6418	1821.35	-188	0.0560821	0.866211	-0.291139	0.923395
11585392	11585892	AT4G21830	Chr4	11584345	11585419	Yes	NA	Yes	1.4288	1.04774	11581917	11582417	AT4G21820	Yes	NA	Yes	0.307285	0.34073	Chr4	11577523	11584053	+	1820	+	48	interaction141855	3475	14	0.070444	0	3	0.070444	300	-2.55614	1781	35	-12.6399	1100	-10	0.483215	0.146968	-0.400879	0.199322
11001041	11001541	AT1G30910	Chr1	11000882	11002936	Yes	NA	Yes	0.444083	0.300057	11000047	11000547	AT1G30900	NA	NA	NA	0.283102	0.33486	Chr1	10997274	11000543	+	413	+	165	interaction21464	994	17	0.070444	0	4	0.070444	400	-3.98237	329	177	-12.6273	1300	-12	0.0697826	0.823985	-0.0374502	0.935774
22943016	22943516	AT5G56700	Chr5	22941793	22943378	NA	NA	Yes	5.37419	7.99169	22940884	22941384	AT5G56690	NA	NA	Yes	4.28376	6.04654	Chr5	22939722	22941099	+	118	+	794	interaction192288	2132	24	0.070444	0	8	0.070444	800	-11.7089	100	896	-12.6245	1600	-22	-0.750198	0.693012	NA	NA
17276542	17277042	AT1G47056	Chr1	17276102	17277659	NA	NA	Yes	1.89213	3.53556	17274992	17275492	AT1G46984	NA	NA	Yes	0.430399	0.305546	Chr1	17274721	17275834	+	1749	+	219	interaction26100	1550	55	0.070444	0	29	0.070444	2900	-74.1778	1865	204	-12.6236	2600	-68	0.0170061	0.969416	NA	NA
3396953	3397453	AT1G10370	Chr1	3397080	3398358	NA	NA	Yes	0.802604	0.937541	3393094	3393594	AT1G10350	NA	NA	NA	0.197029	0.329831	Chr1	3393406	3395055	+	1825	+	65	interaction6211	3859	12	0.070444	0.000134	2	0.070444	200	-1.33095	1715	45	-12.6145	1000	-8	-0.044279	0.89754	-0.140922	0.696317
594472	594972	AT1G02730	Chr1	594572	598657	NA	NA	NA	0.12953	0.216391	592476	592976	AT1G02720	NA	NA	NA	0.110183	0.224287	Chr1	591825	594236	+	77	+	1898	interaction1362	1996	20	0.070444	0	6	0.070444	600	-7.61086	59	1910	-12.5953	1400	-18	-0.399258	0.0465215	-0.324995	0.145347
11247971	11248471	AT2G26440	Chr2	11247382	11249493	NA	NA	Yes	4.71882	2.11048	11245940	11246440	AT2G26430	NA	NA	NA	0.163987	0.254096	Chr2	11243218	11246035	+	1146	+	173	interaction69644	2031	36	0.070444	0	16	0.070444	1600	-32.6444	950	108	-12.5891	2000	-38	-0.102361	0.907813	0.14857	0.481748
5151454	5151954	AT4G08151	Chr4	5151862	5151979	Yes	NA	Yes	3.60806	3.79717	5149954	5150454	AT4G08150	Yes	NA	Yes	7.45254	5.9107	Chr4	5147699	5150966	+	241	+	582	interaction129479	1500	17	0.070444	0	4	0.070444	400	-3.98057	196	693	-12.587	1300	-12	NA	NA	0.116594	0.796526
16591995	16592495	AT4G34780	Chr4	16592396	16592717	Yes	NA	Yes	7.33638	1.26547	16591102	16591602	AT4G34770	Yes	NA	Yes	3.5127	0.569028	Chr4	16591228	16591892	+	663	+	998	interaction151282	893	44	0.070444	0	20	0.070444	2000	-43.5752	602	903	-12.5795	2400	-50	-1.60131	NA	0.342303	0.667504
1607946	1608446	AT4G03620	Chr4	1607039	1608665	NA	NA	Yes	0.348963	0.35745	1604957	1605457	AT4G03610	Yes	NA	Yes	3.48774	1.54154	Chr4	1604938	1606982	+	266	+	1282	interaction128211	2989	48	0.070444	0	24	0.070444	2400	-57.2586	176	1117	-12.5758	2400	-56	-0.269734	NA	0.623944	0.0186116
26317639	26318139	AT1G69870	Chr1	26316026	26320220	Yes	NA	Yes	0.151355	0.23981	26310509	26311009	AT1G69860	Yes	NA	Yes	4.48397	1.62483	Chr1	26309627	26312174	+	36	+	1312	interaction50040	7130	9	0.070444	0.130751	1	0.070444	100	-0.445871	23	1531	-12.5702	800	-4	0.0376094	0.936736	NA	NA
15384026	15384526	AT5G38430	Chr5	15384116	15385247	NA	NA	NA	0.963655	1.88154	15380459	15380959	AT5G38420	Yes	NA	Yes	2.49537	1.3459	Chr5	15380944	15382035	+	1136	+	214	interaction176736	3567	17	0.070444	0	4	0.070444	400	-3.97975	1282	206	-12.5689	1300	-12	-0.19217	0.250304	-0.0632098	0.825852
5175017	5175517	AT3G15356	Chr3	5174401	5175469	NA	Yes	Yes	0.57902	0.313776	5173479	5173979	AT3G15359	NA	NA	NA	0.241767	0.556122	Chr3	5173592	5173781	+	1767	+	282	interaction97204	1538	60	0.070444	0	33	0.070444	3300	-89.6998	1638	147	-12.5655	2700	-76	0.514689	0.0117639	NA	NA
19457002	19457502	AT1G52240	Chr1	19455765	19459586	NA	NA	NA	0.252051	0.270113	19454970	19455470	AT1G52230	NA	NA	NA	0.340617	0.359781	Chr1	19454835	19455668	+	1010	+	1311	interaction31401	2032	56	0.070444	0	30	0.073211	2886.61	-75.971	1187	1291	-12.563	2713.39	-68	-0.398509	0.513116	-0.255505	0.160906
4389961	4390461	AT1G12880	Chr1	4389750	4391151	NA	NA	Yes	0.124354	0.195577	4384405	4384905	AT1G12860	NA	NA	NA	0.201023	0.300787	Chr1	4384352	4386610	+	1811	+	88	interaction8636	5556	22	0.070444	0	7	0.070444	700	-9.59786	1824	78	-12.5524	1500	-20	-0.0574894	0.912703	-0.0600571	0.863817
17924905	17925405	AT5G44490	Chr5	17924034	17925843	NA	NA	Yes	0.172033	0.249273	17923476	17923976	AT5G44480	NA	NA	Yes	0.385874	0.450144	Chr5	17921514	17923643	+	972	+	482	interaction182500	1429	19	0.070444	0	5	0.070444	500	-5.64208	934	200	-12.5453	1400	-14	0.259348	0.516973	0.153226	0.580807
17989578	17990078	AT2G43280	Chr2	17989697	17991022	NA	NA	Yes	3.21122	3.13137	17988870	17989370	AT2G43270	NA	NA	Yes	8.00573	7.0549	Chr2	17988206	17989491	+	673	+	1295	interaction85240	708	30	0.070444	0	11	0.070444	1100	-18.4925	597	1349	-12.5428	1900	-28	0.129702	0.731068	4.88706	NA
20091489	20091989	AT1G53820	Chr1	20091490	20092423	Yes	NA	Yes	0.196271	0.361996	20090463	20090963	AT1G53815	Yes	NA	Yes	3.36191	1.47851	Chr1	20090248	20090962	+	1363	+	1159	interaction32944	1026	91	0.081697	0	63	0.093237	4759.86	-203.613	1640	1190	-12.5389	3086.65	-128	1.61886	NA	NA	NA
25492985	25493485	AT5G63690	Chr5	25492863	25493283	NA	NA	NA	8.21982	1.35772	25490518	25491018	AT5G63680	NA	NA	NA	0.120191	0.203706	Chr5	25490072	25492752	+	166	+	1867	interaction196425	2467	38	0.070444	0	17	0.070444	1700	-35.3037	147	1714	-12.517	2100	-42	0.291376	0.696619	-0.163264	0.413719
19002969	19003469	AT1G51260	Chr1	19003375	19005641	Yes	NA	Yes	0.229023	0.134076	19001600	19002100	AT1G51250	Yes	NA	Yes	8.47557	1.31903	Chr1	19001543	19002215	+	303	+	1016	interaction29385	1369	36	0.070444	0	15	0.070444	1500	-29.1353	310	1066	-12.5079	2100	-38	1.29301	0.215232	NA	NA
13189976	13190476	AT4G25980	Chr4	13189392	13191507	NA	NA	Yes	0.281915	0.277708	13187920	13188420	AT4G25970	NA	NA	NA	0.138517	0.239166	Chr4	13184113	13189435	+	1078	+	126	interaction146530	2056	35	0.070444	0	15	0.070444	1500	-29.5359	1009	136	-12.5027	2000	-38	0.32197	0.796338	-0.00329181	0.993233
17617994	17618494	AT3G47770	Chr3	17618054	17622678	Yes	NA	Yes	0.153443	0.219167	17616515	17617015	AT3G47760	Yes	NA	Yes	4.80187	3.11969	Chr3	17611786	17616639	+	1522	+	126	interaction113833	1479	45	0.070444	0	22	0.070444	2200	-50.8111	1759	160	-12.49	2300	-54	0.114376	0.94849	0.129562	0.966264
25634467	25634967	AT5G64060	Chr5	25633535	25635781	NA	NA	Yes	11.6846	8.2939	25632844	25633344	AT5G64050	NA	NA	Yes	0.142694	0.263424	Chr5	25629854	25633209	+	267	+	1238	interaction196705	1623	28	0.070444	0	10	0.070444	1000	-16.1426	278	1039	-12.4893	1800	-26	-0.777154	0.355602	-0.0994768	0.730221
11227016	11227516	AT4G21010	Chr4	11226285	11227363	NA	NA	Yes	0.552164	0.240092	11223416	11223916	AT4G21000	Yes	NA	Yes	4.69341	1.1421	Chr4	11222528	11223756	+	166	+	1863	interaction141201	3600	41	0.070444	0	19	0.070444	1900	-41.2533	166	1873	-12.4887	2200	-46	NA	NA	1.21356	NA
10055001	10055501	AT1G28610	Chr1	10053616	10055731	Yes	NA	Yes	2.19648	0.697448	10046985	10047485	AT1G28590	Yes	NA	Yes	6.05657	3.32085	Chr1	10047275	10049300	+	1711	+	73	interaction19364	8016	12	0.070444	0.000149	2	0.070444	200	-1.33094	1611	52	-12.4782	1000	-8	-0.226366	0.563547	0.0929228	0.967595
14203481	14203981	AT4G28750	Chr4	14202757	14203961	NA	NA	Yes	0.199544	0.277285	14201016	14201516	AT4G28740	NA	NA	NA	0.184184	0.265775	Chr4	14200902	14202681	+	861	+	836	interaction148582	2465	23	0.070444	0	7	0.070444	700	-9.41715	797	659	-12.4723	1600	-20	-0.176937	0.330266	0.046658	0.875669
11137559	11138059	AT1G31173	Chr1	11137364	11138969	NA	NA	Yes	1.93717	1.48554	11134047	11134547	AT1G31170	Yes	NA	Yes	0.340078	0.43761	Chr1	11133409	11134844	+	1146	+	48	interaction21777	3512	16	0.070444	0	4	0.070444	400	-4.04424	1191	42	-12.4663	1200	-12	NA	NA	0.154769	0.481748
20803004	20803504	AT1G55670	Chr1	20802669	20803449	NA	NA	Yes	0.234798	0.277522	20801997	20802497	AT1G55660	Yes	NA	Yes	2.55398	1.00959	Chr1	20800693	20802340	+	1396	+	1000	interaction34872	1007	78	0.072196	0	44	0.070444	4400	-127.366	1322	859	-12.4356	3210.69	-104	-0.200363	0.354977	-2.52372	NA
21940957	21941457	AT1G59720	Chr1	21939751	21941784	NA	NA	Yes	0.161811	0.307818	21936489	21936989	AT1G59700	Yes	NA	Yes	2.33926	0.600715	Chr1	21936295	21937959	+	998	+	1323	interaction37428	4468	23	0.070444	0	7	0.070444	700	-9.41171	858	1123	-12.4331	1600	-20	-0.12949	0.784125	0.136047	0.548689
17760097	17760597	AT1G48095	Chr1	17760141	17761998	NA	Yes	Yes	1.54024	1.42185	17758017	17758517	AT1G48090	NA	NA	NA	0.286188	0.383671	Chr1	17732009	17758444	+	661	+	77	interaction27156	2080	12	0.070444	0.000155	2	0.070444	200	-1.33093	1152	55	-12.4315	1000	-8	NA	NA	-0.436738	0.0109939
4384046	4384546	AT1G12860	Chr1	4384352	4386610	NA	NA	NA	0.201023	0.300787	4382475	4382975	AT1G12855	NA	NA	Yes	1.94298	2.47187	Chr1	4382159	4383611	+	43	+	1104	interaction8597	1571	9	0.070444	0.152207	1	0.070444	100	-0.447365	26	1247	-12.4268	800	-4	-0.0600571	0.863817	-1.1258	NA
8309397	8309897	AT4G14450	Chr4	8309473	8310058	NA	NA	Yes	3.55603	3.58044	8306551	8307051	AT4G14440	NA	NA	Yes	7.40558	9.85274	Chr4	8306744	8307753	+	852	+	263	interaction134682	2846	19	0.070444	0	5	0.070444	500	-5.63311	786	278	-12.4237	1400	-16	0.197992	0.951463	-0.426955	0.00316235
1639192	1639692	AT1G05540	Chr1	1639285	1640811	NA	NA	Yes	1.8383	1.65561	1636950	1637450	AT1G05530	NA	NA	Yes	0.768102	1.24199	Chr1	1636495	1637863	+	290	+	1228	interaction3440	2242	17	0.070444	0	4	0.070444	400	-3.97306	356	1272	-12.422	1300	-12	0.0616267	0.921202	-0.137941	0.901855
22840459	22840959	AT5G56380	Chr5	22838671	22841015	Yes	NA	Yes	0.161449	0.238945	22837564	22838064	AT5G56370	Yes	NA	Yes	12.2829	2.26272	Chr5	22835981	22837941	+	354	+	1039	interaction191894	2895	19	0.070444	0	5	0.070444	500	-5.63278	282	1068	-12.4194	1400	-16	0.160116	0.578346	2.91671	7.54e-48
517032	517532	AT5G02410	Chr5	517211	519756	NA	NA	NA	9.61086	8.50538	513558	514058	AT5G02400	NA	NA	Yes	0.544892	0.643195	Chr5	513560	515896	+	86	+	1317	interaction156533	3474	22	0.070444	0	7	0.070444	700	-9.58047	85	1302	-12.4178	1500	-20	-0.488055	0.045005	0.191766	0.687241
20859497	20859997	AT3G56220	Chr3	20858917	20860531	NA	NA	Yes	0.156902	0.228441	20853035	20853535	AT3G56210	NA	NA	Yes	0.268889	0.281909	Chr3	20852384	20855610	+	1881	+	51	interaction120234	6462	12	0.070444	0.000103	2	0.070444	200	-1.33093	1828	56	-12.4171	1000	-8	0.200432	0.853353	0.239138	0.292865
24205959	24206459	AT1G65160	Chr1	24206223	24207738	NA	NA	Yes	5.08133	4.08553	24205046	24205546	AT1G65150	NA	NA	Yes	2.46159	2.64238	Chr1	24203840	24205775	+	887	+	907	interaction43332	913	41	0.070444	0	18	0.070444	1800	-37.496	890	1049	-12.4169	2300	-44	NA	NA	-0.0875711	0.887138
16599045	16599545	AT4G34810	Chr4	16599103	16599421	Yes	NA	Yes	5.89107	1.1874	16591412	16591912	AT4G34770	Yes	NA	Yes	3.5127	0.569028	Chr4	16591228	16591892	+	1196	+	1227	interaction151378	7633	24	0.075893	0	7	0.070444	700	-9.40839	1052	1214	-12.4093	1527.67	-22	0.655529	0.312285	0.342303	0.667504
3828054	3828554	AT1G11370	Chr1	3828097	3830945	NA	Yes	Yes	7.68236	13.792	3824485	3824985	AT1G11362	NA	NA	Yes	1.08557	0.901237	Chr1	3824509	3825196	+	111	+	1506	interaction7000	3569	37	0.070444	0	17	0.070444	1700	-35.7198	101	1395	-12.4083	2000	-42	2.53546	NA	0.142014	NA
224101	224601	AT1G01610	Chr1	221690	224340	NA	NA	Yes	0.430751	0.723878	220102	220602	AT1G01600	NA	NA	Yes	0.610553	0.796784	Chr1	218993	221286	+	698	+	226	interaction447	3999	26	0.070444	0	9	0.070444	900	-13.8592	619	179	-12.4076	1700	-24	-0.00704288	0.986226	-0.250507	0.307491
7469500	7470000	AT1G21326	Chr1	7469001	7469721	NA	NA	Yes	2.19933	2.53866	7466541	7467041	AT1G21323	Yes	NA	Yes	2.30664	0.745113	Chr1	7466693	7467359	+	1414	+	373	interaction14298	2959	19	0.070444	0	5	0.070444	500	-5.63186	1381	294	-12.407	1400	-16	1.19901	0.383368	NA	NA
19900026	19900526	AT1G53340	Chr1	19898927	19900931	NA	NA	Yes	0.708644	0.564507	19896472	19896972	AT1G53330	NA	NA	Yes	0.438498	0.521335	Chr1	19896026	19897442	+	58	+	899	interaction32263	3554	12	0.070444	0.00012	2	0.070444	200	-1.33093	57	934	-12.4033	1000	-8	0.251941	0.681069	0.183339	0.876519
27497499	27497999	AT1G73120	Chr1	27497185	27497950	NA	Yes	NA	0.191764	0.256591	27496064	27496564	AT1G73110	NA	Yes	Yes	0.198045	0.326467	Chr1	27494120	27496878	+	1806	+	145	interaction52384	1435	25	0.070444	0	9	0.070444	900	-14.0945	1627	75	-12.3916	1600	-22	0.420939	0.0499248	-0.17471	0.331944
2641605	2642105	AT3G08690	Chr3	2641055	2642688	NA	NA	Yes	4.51421	1.31075	2636568	2637068	AT3G08670	NA	NA	NA	0.130824	0.253939	Chr3	2633727	2636715	+	1171	+	64	interaction93032	5037	12	0.070444	0.000132	2	0.070444	200	-1.33093	1160	58	-12.39	1000	-8	0.119533	0.607018	-0.0781925	0.839334
26768069	26768569	AT5G67070	Chr5	26768019	26768846	NA	NA	Yes	3.09696	0.595168	26766553	26767053	AT5G67060	NA	Yes	Yes	5.14152	11.71	Chr5	26766127	26767250	+	130	+	1033	interaction198403	1516	27	0.070444	0	10	0.070444	1000	-16.3845	101	868	-12.3875	1700	-26	-0.274534	0.0564739	-0.709211	0.60117
20923952	20924452	AT1G55940	Chr1	20922458	20925619	NA	NA	NA	0.187048	0.302839	20919515	20920015	AT1G55930	NA	Yes	Yes	0.461167	0.565075	Chr1	20918716	20922232	+	1024	+	33	interaction35096	4437	9	0.070444	0.119675	1	0.070444	100	-0.447788	1240	27	-12.3871	800	-4	0.204213	0.706988	-0.150615	0.590279
22807002	22807502	AT1G61760	Chr1	22807439	22808114	NA	NA	Yes	0.750082	0.754622	22805399	22805899	AT1G61750	Yes	NA	Yes	9.67502	9.41781	Chr1	22804612	22806318	+	32	+	741	interaction39990	1603	9	0.070444	0.115706	1	0.070444	100	-0.447788	27	805	-12.3871	800	-4	0.28604	0.722662	1.8669	0.263673
168984	169484	AT2G01370	Chr2	168630	169642	NA	NA	Yes	6.17956	4.1509	167989	168489	AT2G01360	NA	NA	NA	1.65681	1.27347	Chr2	167996	168479	+	1200	+	1278	interaction58613	995	84	0.079312	0	78	0.123885	4435.25	-267.813	1658	1564	-12.3827	3025.49	-116	1.21356	NA	NA	NA
27397468	27397968	AT1G72800	Chr1	27397215	27398500	NA	Yes	Yes	1.36905	0.612227	27396393	27396893	AT1G72790	NA	Yes	Yes	0.159505	0.240957	Chr1	27394746	27396799	+	1165	+	581	interaction52273	1075	33	0.070444	0	13	0.070444	1300	-23.6212	1541	470	-12.3814	2000	-34	0.195936	0.585977	1.43856	3.55e-17
17618462	17618962	AT3G47770	Chr3	17618054	17622678	Yes	NA	Yes	0.153443	0.219167	17606588	17607088	AT3G47750	NA	NA	Yes	2.71768	1.91709	Chr3	17606426	17610889	+	1361	+	686	interaction113842	11874	17	0.070444	0	4	0.070444	400	-3.97079	1807	473	-12.3731	1300	-12	0.114376	0.94849	0.45335	0.0332909
11764113	11764613	AT2G27530	Chr2	11763216	11764845	Yes	NA	Yes	6.58093	4.86623	11761601	11762101	AT2G27520	NA	NA	Yes	3.70554	4.08233	Chr2	11762060	11763104	+	1387	+	91	interaction70539	2512	14	0.070444	1e-06	3	0.070444	300	-2.55096	1329	41	-12.3612	1100	-10	0.11873	0.59068	-1.51325	NA
23105921	23106421	AT5G57100	Chr5	23106301	23108795	NA	NA	Yes	9.51102	22.1983	23101505	23102005	AT5G57090	NA	NA	Yes	5.78506	6.23379	Chr5	23100692	23104735	+	90	+	1180	interaction192641	4416	12	0.070444	0.000172	2	0.070444	200	-1.33092	61	1212	-12.353	1000	-8	0.318205	0.132429	-0.0799003	0.855754
7521316	7521816	AT4G12800	Chr4	7521321	7522670	NA	NA	NA	0.287044	0.462666	7518949	7519449	AT4G12790	NA	NA	NA	0.148922	0.234365	Chr4	7517054	7519422	+	1205	+	70	interaction133237	2367	12	0.070444	0.000144	2	0.070444	200	-1.33092	1087	62	-12.3415	1000	-8	-0.142484	0.485594	0.304843	0.0676282
8710946	8711446	AT4G15250	Chr4	8709941	8711108	NA	NA	Yes	15.2757	31.503	8708939	8709439	AT4G15248	NA	NA	NA	0.336387	0.34897	Chr4	8708847	8709373	+	1947	+	258	interaction135551	2007	72	0.070444	0	43	0.070444	4300	-127.151	1995	201	-12.3408	2900	-98	3.05929	NA	-1.33265	3.54e-06
3620898	3621398	AT5G11340	Chr5	3619154	3621301	NA	NA	NA	0.185641	0.247435	3618060	3618560	AT5G11330	NA	Yes	NA	0.190971	0.330283	Chr5	3617214	3618897	+	106	+	1619	interaction163007	2838	22	0.070444	0	7	0.070444	700	-9.56977	90	1701	-12.3364	1500	-20	0.190715	0.364564	-0.057205	0.832878
461510	462010	AT1G02320	Chr1	461827	461974	NA	NA	NA	0.134682	0.229497	459555	460055	AT1G02310	NA	Yes	Yes	2.0916	3.60926	Chr1	458132	460696	+	116	+	917	interaction873	1955	27	0.070444	0	10	0.070444	1000	-16.3697	105	988	-12.3232	1700	-26	0.117652	NA	0.362396	0.644135
18181990	18182490	AT1G49160	Chr1	18179303	18182391	NA	NA	Yes	1.5609	1.69864	18178033	18178533	AT1G49140	NA	NA	Yes	0.190489	0.245474	Chr1	18176771	18178298	+	1337	+	148	interaction27793	3957	24	0.070444	0	8	0.070444	800	-11.6594	1062	128	-12.3227	1600	-22	-0.105158	0.800525	0.0205731	0.951821
17198606	17199106	AT2G41240	Chr2	17198281	17199320	NA	Yes	Yes	4.36745	3.6848	17197053	17197553	AT2G41233	NA	NA	Yes	0.625973	0.333813	Chr2	17196650	17196758	+	965	+	56	interaction83115	1553	9	0.070444	0.179936	1	0.070444	100	-0.448546	923	29	-12.3171	800	-4	-0.961343	0.349964	NA	NA
8909412	8909912	AT4G15610	Chr4	8909063	8910908	Yes	NA	Yes	0.290623	0.285128	8892605	8893105	AT4G15570	NA	NA	NA	0.155561	0.208155	Chr4	8892606	8898999	+	2003	+	53	interaction136233	16807	9	0.070444	0.174676	1	0.070444	100	-0.448546	1965	29	-12.3171	800	-4	0.476519	0.53814	-0.217205	0.452654
3064081	3064581	AT1G09490	Chr1	3064123	3065937	NA	NA	Yes	0.305924	0.306031	3061034	3061534	AT1G09483	Yes	NA	Yes	6.08657	4.31851	Chr1	3060991	3061729	+	684	+	1714	interaction5681	3047	33	0.070444	0	13	0.070444	1300	-23.5968	566	1906	-12.3128	2000	-34	0.288382	0.143196	4.09329	NA
10609486	10609986	AT1G30170	Chr1	10607887	10609618	NA	NA	Yes	5.81242	4.56991	10606481	10606981	AT1G30160	Yes	NA	Yes	8.41361	5.99651	Chr1	10606209	10607810	+	683	+	1603	interaction20827	3005	31	0.070444	0	14	0.080142	1230.57	-26.22	810	2071	-12.3004	1869.43	-30	3.99374	NA	1.8872	1.47e-05
20272028	20272528	AT3G54760	Chr3	20269079	20272457	NA	Yes	Yes	0.48808	0.428401	20268484	20268984	AT3G54750	NA	NA	NA	0.113952	0.203313	Chr3	20264633	20268881	+	1748	+	104	interaction119034	3544	18	0.070444	0	5	0.070444	500	-5.72915	1547	55	-12.2999	1300	-14	-0.161534	0.390711	-0.440398	0.0124859
7083983	7084483	AT5G20885	Chr5	7083964	7084734	NA	NA	NA	2.50911	0.977682	7081525	7082025	AT5G20870	NA	NA	NA	0.246797	0.270702	Chr5	7079974	7081769	+	1074	+	712	interaction168883	2458	19	0.070444	0	5	0.070444	500	-5.62313	1016	493	-12.2915	1400	-14	-0.104823	0.74741	-0.422562	0.550492
8599548	8600048	AT5G24960	Chr5	8599987	8603194	NA	NA	Yes	0.181781	0.265653	8597501	8598001	AT5G24950	Yes	NA	Yes	3.0784	1.88312	Chr5	8595208	8597761	+	44	+	765	interaction172239	2047	9	0.070444	0.154851	1	0.070444	100	-0.448887	30	736	-12.286	800	-4	0.569951	0.56559	5.33026	NA
8607001	8607501	AT2G19930	Chr2	8607339	8612441	NA	NA	NA	3.71691	3.3615	8600583	8601083	AT2G19910	NA	NA	Yes	0.7063	0.587547	Chr2	8595819	8600757	+	92	+	905	interaction65535	6418	12	0.070444	0.000174	2	0.070444	200	-1.33092	68	852	-12.2804	1000	-8	0.0936597	0.787499	-0.279585	0.533714
611038	611538	AT3G02820	Chr3	611523	613448	NA	NA	Yes	4.59363	8.83044	607447	607947	AT3G02800	NA	NA	Yes	0.123741	0.188834	Chr3	606470	607886	+	101	+	774	interaction90133	3591	12	0.070444	0.000183	2	0.070444	200	-1.33092	68	453	-12.2804	1000	-8	-0.209457	0.658499	0.163847	0.832856
5820956	5821456	AT5G17670	Chr5	5821059	5822736	NA	NA	NA	4.56439	5.49917	5818568	5819068	AT5G17660	Yes	NA	Yes	0.204424	0.236436	Chr5	5818547	5820864	+	995	+	760	interaction166053	2388	36	0.070444	0	15	0.070444	1500	-29.0348	853	463	-12.2724	2100	-38	-0.046186	0.878585	-0.0867734	0.807398
1080040	1080540	AT1G04140	Chr1	1075542	1080630	NA	NA	NA	0.144096	0.229436	1070429	1070929	AT1G04120	NA	Yes	Yes	0.145836	0.243476	Chr1	1064449	1071047	+	81	+	1516	interaction2493	9611	12	0.070444	0.000161	2	0.070444	200	-1.33092	69	1337	-12.2713	1000	-8	-0.0886876	0.705907	-0.337872	0.0469678
26146954	26147454	AT1G69540	Chr1	26145043	26147571	NA	NA	Yes	0.55635	0.658636	26132511	26133011	AT1G69526	NA	NA	NA	0.117162	0.17638	Chr1	26131293	26133196	+	2014	+	225	interaction49224	14443	48	0.070444	0	24	0.070444	2400	-57.0281	2124	206	-12.2639	2400	-56	-0.381026	0.740723	0.108621	0.799412
26286527	26287027	AT1G69825	Chr1	26286495	26286929	NA	NA	Yes	1.1988	0.921963	26278990	26279490	AT1G69810	Yes	NA	Yes	9.77549	13.1579	Chr1	26277237	26279118	+	86	+	1166	interaction49950	7537	12	0.070444	0.000167	2	0.070444	200	-1.33092	70	1049	-12.2625	1000	-8	NA	NA	0.268745	0.287977
21787390	21787890	AT5G53635	Chr5	21785998	21787444	Yes	NA	Yes	0.329155	0.465745	21785070	21785570	AT5G53620	Yes	NA	Yes	0.633855	0.411491	Chr5	21780946	21785230	+	894	+	46	interaction189319	2320	9	0.070444	0.159828	1	0.070444	100	-0.449205	1044	31	-12.2572	800	-4	NA	NA	-0.135596	0.496259
3155386	3155886	AT3G10190	Chr3	3155297	3156143	NA	Yes	Yes	2.28047	0.952061	3154483	3154983	AT3G10180	NA	Yes	NA	0.132514	0.250793	Chr3	3146392	3154644	+	1252	+	76	interaction94291	903	20	0.070444	0	6	0.070444	600	-7.57672	950	72	-12.2479	1400	-18	-0.196188	0.561703	-0.436734	0.20811
21936155	21936655	AT1G59700	Chr1	21936295	21937959	Yes	NA	Yes	3.80468	1.60744	21935369	21935869	AT1G59690	Yes	NA	Yes	6.73999	1.26696	Chr1	21935309	21935820	+	707	+	1764	interaction37342	786	28	0.070444	0	10	0.070444	1000	-16.0792	529	1763	-12.2286	1800	-26	0.136047	0.548689	NA	NA
6244457	6244957	AT2G14620	Chr2	6244780	6246233	NA	NA	Yes	0.642424	0.509959	6241930	6242430	AT2G14610	NA	NA	Yes	12.8603	22.0858	Chr2	6241703	6242463	+	105	+	943	interaction61544	2527	22	0.070444	0	7	0.070444	700	-9.55165	100	1159	-12.2013	1500	-20	0.00564075	0.996246	0.614338	0.605451
4303044	4303544	AT1G12640	Chr1	4303311	4305798	NA	NA	NA	0.290863	0.308352	4299366	4299866	AT1G12630	Yes	NA	Yes	13.34	15.5236	Chr1	4298888	4299475	+	67	+	684	interaction8533	3678	12	0.070444	0.000138	2	0.070444	200	-1.33091	79	620	-12.194	1000	-8	0.0147863	0.964471	1.02528	0.298673
7546956	7547456	AT4G12890	Chr4	7546376	7547641	Yes	NA	Yes	0.260489	0.325048	7543962	7544462	AT4G12880	NA	NA	Yes	1.32959	0.261076	Chr4	7544380	7545327	+	1002	+	82	interaction133380	2994	12	0.070444	0.000162	2	0.070444	200	-1.33091	953	80	-12.1874	1000	-8	-0.184137	0.926188	-0.00426745	0.992045
11766041	11766541	AT4G22240	Chr4	11765802	11767304	NA	Yes	NA	4.12224	4.03734	11762428	11762928	AT4G22230	NA	NA	Yes	5.58696	6.49479	Chr4	11762291	11762688	+	314	+	1803	interaction142825	3613	47	0.070444	0	23	0.070444	2300	-53.4657	265	1819	-12.1835	2400	-54	0.151618	0.442572	0.739958	0.246261
406470	406970	AT2G01900	Chr2	405917	409014	NA	NA	Yes	4.98135	0.548715	392962	393462	AT2G01880	NA	NA	Yes	0.548788	0.365002	Chr2	391422	394032	+	1083	+	32	interaction58923	13508	9	0.070444	0.115706	1	0.070444	100	-0.450048	938	34	-12.1821	800	-4	0.060824	0.91294	0.708598	0.0044764
2622475	2622975	AT5G08150	Chr5	2622029	2622720	Yes	NA	Yes	0.170345	0.295614	2618958	2619458	AT5G08141	Yes	NA	Yes	4.41206	1.24158	Chr5	2619141	2619555	+	409	+	39	interaction160982	3517	9	0.070444	0.140629	1	0.070444	100	-0.450048	311	34	-12.1821	800	-4	2.44571	0.00102724	2.64394	NA
17601551	17602051	AT1G47800	Chr1	17601512	17602676	Yes	NA	Yes	0.128544	0.267962	17600417	17600917	AT1G47790	Yes	NA	Yes	11.9655	7.17414	Chr1	17600003	17601173	+	746	+	776	interaction26970	1134	48	0.070444	0	23	0.070444	2300	-52.8652	874	777	-12.1807	2500	-56	NA	NA	NA	NA
3217990	3218490	AT3G10370	Chr3	3216367	3219270	NA	NA	NA	10.6949	5.13314	3215462	3215962	AT3G10360	NA	NA	NA	0.141118	0.232482	Chr3	3210883	3215556	+	152	+	1631	interaction94400	2528	24	0.070444	0	8	0.070444	800	-11.6338	150	1411	-12.172	1600	-22	0.0300651	0.926325	-0.62465	3.45e-06
13910026	13910526	AT2G32795	Chr2	13909422	13910910	NA	NA	Yes	0.233293	0.247177	13904494	13904994	AT2G32788	Yes	NA	Yes	2.71297	1.48456	Chr2	13904915	13905110	+	1153	+	53	interaction76253	5532	9	0.070444	0.174676	1	0.070444	100	-0.450296	1287	35	-12.1602	800	-4	0.234004	0.616704	NA	NA
13197038	13197538	AT4G26000	Chr4	13197245	13199836	NA	NA	Yes	2.09352	2.74004	13190424	13190924	AT4G25980	NA	NA	Yes	0.352189	0.303349	Chr4	13189392	13191507	+	133	+	1905	interaction146590	6614	12	0.070444	0.000207	2	0.070444	200	-1.33091	85	1603	-12.1569	1000	-8	0.0170954	0.964214	0.32197	0.796338
10353127	10353627	AT3G27900	Chr3	10352904	10353639	NA	NA	NA	0.290405	0.273951	10347992	10348492	AT3G27884	NA	NA	NA	1.13508	0.835997	Chr3	10346154	10348282	+	1217	+	308	interaction108042	5135	24	0.070444	0	8	0.070444	800	-11.6299	1384	154	-12.1497	1600	-22	-0.496481	0.687456	0.449807	0.0777859
15641517	15642017	AT5G39080	Chr5	15641657	15643161	NA	NA	NA	0.172787	0.268464	15634987	15635487	AT5G39050	NA	NA	Yes	0.397145	0.510626	Chr5	15634585	15636065	+	1272	+	1903	interaction177810	6530	44	0.125185	0	13	0.093648	977.884	-23.5346	1188	1650	-12.1411	1498.06	-48	-0.138869	0.605084	0.249622	0.402605
1055001	1055501	AT3G04060	Chr3	1053365	1055163	NA	NA	Yes	0.18701	0.333541	1051117	1051617	AT3G04050	NA	NA	Yes	0.233935	0.313126	Chr3	1049794	1051522	+	44	+	692	interaction90571	3884	9	0.070444	0.154851	1	0.070444	100	-0.450531	36	545	-12.1397	800	-4	0.328268	0.279093	0.517923	0.797502
7873563	7874063	AT5G23390	Chr5	7870512	7874505	NA	NA	NA	2.448	1.6558	7867520	7868020	AT5G23380	Yes	NA	Yes	0.687643	0.394774	Chr5	7866741	7870302	+	88	+	1087	interaction170916	6043	12	0.070444	0.00017	2	0.070444	200	-1.33091	89	720	-12.1351	1000	-8	-0.0344363	0.922265	0.306038	0.27791
29076413	29076913	AT1G77380	Chr1	29074887	29077390	NA	NA	Yes	0.213384	0.307382	29073561	29074061	AT1G77370	NA	NA	NA	0.137606	0.217377	Chr1	29073842	29074796	+	1779	+	183	interaction55687	2852	51	0.070444	0	27	0.070444	2700	-67.7465	1705	156	-12.1217	2400	-62	0.0950925	0.891667	0.409541	0.00430935
12592500	12593000	AT2G29320	Chr2	12592147	12593686	NA	NA	Yes	1.65206	1.32101	12563499	12563999	AT2G29220	NA	Yes	Yes	8.02955	14.1358	Chr2	12562780	12564664	+	1553	+	84	interaction72458	29001	12	0.070444	0.000165	2	0.070444	200	-1.33091	1456	93	-12.1152	1000	-8	0.146937	0.57366	-3.00148	NA
10143541	10144041	AT2G23830	Chr2	10143645	10144511	Yes	NA	Yes	1.83172	0.827496	10140992	10141492	AT2G23820	NA	NA	NA	0.226089	0.256758	Chr2	10140526	10142899	+	529	+	80	interaction67806	2549	18	0.070444	0	5	0.070444	500	-5.71526	564	62	-12.1052	1300	-14	1.88802	NA	-0.182186	0.466302
6420402	6420902	AT1G18650	Chr1	6418857	6420557	NA	NA	NA	0.138132	0.231578	6409894	6410394	AT1G18620	NA	NA	NA	0.110879	0.203164	Chr1	6409977	6414451	+	56	+	1200	interaction12258	10508	9	0.070444	0.179936	1	0.070444	100	-0.450962	38	1169	-12.1022	800	-4	0.0278088	0.933167	0.120626	0.719268
4472528	4473028	AT1G13120	Chr1	4469180	4473213	NA	NA	Yes	0.130418	0.222228	4467657	4468157	AT1G13110	NA	NA	Yes	0.151921	0.239401	Chr1	4467219	4469033	+	100	+	474	interaction8971	4871	12	0.070444	0.000182	2	0.070444	200	-1.33091	97	408	-12.0971	1000	-8	-0.148188	0.573587	-0.0260551	0.942607
5790040	5790540	AT1G16930	Chr1	5789986	5791534	NA	NA	Yes	6.7698	5.18144	5788930	5789430	AT1G16920	NA	NA	Yes	0.23884	0.334842	Chr1	5787329	5789249	+	95	+	338	interaction11285	1110	12	0.070444	0.000177	2	0.070444	200	-1.33091	97	302	-12.0971	1000	-8	0.453506	0.0744462	0.109006	0.669145
17420078	17420578	AT3G47290	Chr3	17420509	17423588	NA	NA	Yes	1.54461	1.97582	17401436	17401936	AT3G47250	NA	NA	Yes	0.854387	1.05029	Chr3	17399876	17401731	+	114	+	973	interaction113361	18642	12	0.070444	0.000194	2	0.070444	200	-1.33091	98	705	-12.0929	1000	-8	-0.0564588	0.841778	0.0790072	0.78769
6267671	6268171	AT1G18210	Chr1	6266608	6268828	NA	NA	Yes	0.424106	0.573055	6265117	6265617	AT1G18200	NA	NA	Yes	3.31238	3.93083	Chr1	6265415	6266937	+	790	+	45	interaction12035	2554	9	0.070444	0.157388	1	0.070444	100	-0.451161	635	39	-12.085	800	-4	0.239781	0.142968	0.834867	0.0211246
1807456	1807956	AT1G05950	Chr1	1804400	1807471	NA	NA	Yes	0.116175	0.216235	1803462	1803962	AT1G05940	NA	NA	NA	0.152504	0.249991	Chr1	1801161	1803984	+	102	+	2010	interaction4016	3994	18	0.070444	0	5	0.070444	500	-5.71353	63	1978	-12.0816	1300	-14	-0.304168	0.34748	-0.00127067	0.997061
507680	508180	AT4G01210	Chr4	507716	512782	NA	NA	NA	0.139797	0.257307	506911	507411	AT4G01200	NA	NA	NA	0.264542	0.312443	Chr4	506510	507626	+	542	+	478	interaction126015	769	26	0.070444	0	9	0.070444	900	-13.7901	398	310	-12.0756	1700	-24	0.0849945	0.718702	-0.314992	0.556438
18303561	18304061	AT3G49360	Chr3	18303045	18304416	NA	NA	Yes	10.3272	16.7542	18299511	18300011	AT3G49350	NA	NA	NA	0.17204	0.310377	Chr3	18297405	18300189	+	782	+	119	interaction115151	4050	12	0.070444	0.000198	2	0.070444	200	-1.3309	750	104	-12.069	1000	-8	0.0696129	0.864389	0.142791	0.609589
6269403	6269903	AT5G18810	Chr5	6268717	6271325	NA	NA	NA	5.50307	3.20543	6264502	6265002	AT5G18780	NA	NA	NA	0.229136	0.316205	Chr5	6264269	6266174	+	45	+	1109	interaction167399	4901	9	0.070444	0.157388	1	0.070444	100	-0.451351	40	1288	-12.0688	800	-4	-0.0279985	0.980378	0.0499042	0.92716
10026506	10027006	AT4G18050	Chr4	10022204	10027415	Yes	NA	Yes	0.794484	0.811922	10017996	10018496	AT4G18040	NA	NA	Yes	0.217201	0.314179	Chr4	10016566	10018228	+	129	+	701	interaction138484	8510	12	0.070444	0.000204	2	0.070444	200	-1.3309	106	611	-12.0616	1000	-8	-0.246996	0.382023	0.0790441	0.769644
3316420	3316920	AT5G10510	Chr5	3315528	3320202	NA	NA	Yes	0.530441	0.858447	3307932	3308432	AT5G10500	NA	NA	Yes	0.895912	1.19834	Chr5	3305330	3308109	+	1347	+	96	interaction162283	8488	18	0.070444	0	5	0.070444	500	-5.71187	1509	64	-12.0588	1300	-14	-0.027603	0.964019	0.509668	NA
28047859	28048359	AT1G74660	Chr1	28047575	28048127	Yes	NA	Yes	0.173421	0.26533	28034001	28034501	AT1G74640	NA	NA	NA	0.173989	0.250564	Chr1	28032762	28034773	+	1812	+	80	interaction53719	13858	12	0.070444	0.000159	2	0.070444	200	-1.3309	2021	108	-12.0546	1000	-8	0.175449	0.645037	0.0166182	0.965922
13171417	13171917	AT4G25940	Chr4	13169640	13172881	NA	Yes	Yes	1.25406	0.99475	13164880	13165380	AT4G25910	NA	NA	NA	0.247001	0.335656	Chr4	13163928	13165205	+	112	+	1416	interaction146388	6537	12	0.070444	0.000193	2	0.070444	200	-1.3309	108	1506	-12.0546	1000	-8	0.473088	0.150341	0.147653	0.458687
18615603	18616103	AT3G50210	Chr3	18614169	18616452	NA	NA	NA	0.141254	0.221769	18605587	18606087	AT3G50180	Yes	NA	Yes	6.68715	7.51428	Chr3	18604940	18607162	+	1282	+	95	interaction115803	10016	12	0.070444	0.000177	2	0.070444	200	-1.3309	1061	111	-12.0445	1000	-8	0.222311	0.37895	0.509668	NA
16675936	16676436	AT4G35030	Chr4	16675701	16678206	NA	NA	Yes	0.243855	0.267186	16673129	16673629	AT4G35020	NA	Yes	Yes	0.25037	0.402441	Chr4	16672191	16674771	+	1047	+	90	interaction151692	2807	14	0.070444	1e-06	3	0.070444	300	-2.54464	1175	52	-12.0414	1100	-10	0.29327	0.231421	0.141967	0.592087
2645386	2645886	AT3G08710	Chr3	2645166	2646497	NA	NA	NA	7.16894	2.39739	2638513	2639013	AT3G08680	NA	NA	Yes	0.146888	0.222527	Chr3	2637559	2640838	+	1633	+	106	interaction93077	6873	12	0.070444	0.000188	2	0.070444	200	-1.3309	1557	112	-12.0413	1000	-8	0.193047	0.392869	-0.309778	0.045039
4847424	4847924	AT1G14180	Chr1	4847161	4849207	NA	NA	NA	0.145515	0.201949	4839014	4839514	AT1G14140	NA	NA	NA	0.216369	0.257051	Chr1	4837926	4839633	+	1470	+	133	interaction9722	8410	12	0.070444	0.000207	2	0.070444	200	-1.3309	1506	113	-12.0381	1000	-8	-0.0846634	0.864135	-0.180503	0.521325
7494015	7494515	AT1G21400	Chr1	7493425	7496710	NA	NA	NA	0.163733	0.258329	7484020	7484520	AT1G21370	NA	NA	Yes	0.237772	0.367512	Chr1	7483780	7485666	+	1993	+	123	interaction14381	9995	12	0.070444	0.000201	2	0.070444	200	-1.3309	1647	113	-12.0381	1000	-8	0.59145	0.0128884	0.146364	0.622555
25829126	25829626	AT1G68760	Chr1	25829041	25829813	NA	NA	Yes	0.216473	0.272725	25827949	25828449	AT1G68750	Yes	NA	Yes	4.58319	2.81823	Chr1	25822941	25828107	+	1397	+	1707	interaction48740	1177	59	0.123327	0	23	0.099626	1626.28	-52.7466	1277	1633	-12.0271	1743.77	-72	0.0336305	0.937205	1.81658	0.254496
18706521	18707021	AT5G46140	Chr5	18704996	18706708	Yes	NA	Yes	0.205797	0.297494	18704442	18704942	AT5G46130	Yes	NA	Yes	4.36821	2.76281	Chr5	18702913	18704484	+	172	+	238	interaction184168	2079	12	0.070444	0.000225	2	0.070444	200	-1.3309	117	180	-12.026	1000	-8	-0.147374	0.950182	0.912442	0.603493
7239127	7239627	AT4G12080	Chr4	7239218	7241494	NA	NA	Yes	0.115079	0.18426	7229850	7230350	AT4G12060	NA	NA	Yes	0.548281	0.321585	Chr4	7228006	7229941	+	65	+	1147	interaction132517	9277	9	0.070444	0.192781	1	0.070444	100	-0.451865	43	1099	-12.025	800	-4	0.314975	0.136553	-0.178045	0.370467
3517048	3517548	AT5G11080	Chr5	3517222	3520003	NA	NA	Yes	1.01412	1.22417	3516382	3516882	AT5G11070	NA	NA	Yes	0.477711	0.352319	Chr5	3516216	3516995	+	209	+	1064	interaction162684	666	12	0.070444	0.000237	2	0.070444	200	-1.3309	118	888	-12.0231	1000	-8	0.0999511	NA	0.883142	4.79e-07
3355885	3356385	AT5G10620	Chr5	3355319	3356615	NA	NA	Yes	0.169364	0.177202	3353556	3354056	AT5G10610	NA	NA	NA	0.196778	0.287027	Chr5	3353506	3355124	+	464	+	127	interaction162412	2329	12	0.070444	0.000203	2	0.070444	200	-1.3309	407	119	-12.0203	1000	-8	-0.212007	0.59656	0.117303	0.714892
2027521	2028021	AT1G06630	Chr1	2027738	2031388	NA	Yes	NA	0.126034	0.224835	2026060	2026560	AT1G06620	NA	Yes	Yes	2.52304	4.34473	Chr1	2025600	2027271	+	152	+	973	interaction4399	1461	46	0.070444	0	24	0.070444	2400	-58.2232	111	1005	-12.0186	2200	-54	0.230168	0.254496	1.29193	2.43e-13
12218593	12219093	AT4G23390	Chr4	12217805	12219713	Yes	NA	Yes	0.208208	0.339258	12213919	12214419	AT4G23375	NA	NA	NA	8.31594	1.65691	Chr4	12214068	12214167	+	1347	+	156	interaction144360	4674	12	0.070444	0.000219	2	0.070444	200	-1.3309	1425	125	-12.0042	1000	-8	3.43493	0.0696748	NA	NA
9420128	9420628	AT2G22145	Chr2	9420319	9420589	Yes	NA	Yes	0.732764	0.484305	9413596	9414096	AT2G22125	NA	NA	NA	0.142627	0.244025	Chr2	9406262	9414518	+	903	+	59	interaction66663	6532	9	0.070444	0.184707	1	0.070444	100	-0.452169	805	45	-11.9993	800	-4	NA	NA	-0.241414	0.174438
2132694	2133194	AT3G06760	Chr3	2132757	2134556	NA	NA	NA	2.27454	1.5552	2127445	2127945	AT3G06740	NA	NA	NA	0.127868	0.250566	Chr3	2126413	2127467	+	402	+	85	interaction92254	5249	9	0.070444	0.210708	1	0.070444	100	-0.452169	250	45	-11.9993	800	-4	0.0618802	0.842593	-0.232219	0.381978
11865969	11866469	AT4G22540	Chr4	11860443	11866364	Yes	NA	Yes	10.4705	7.09007	11859512	11860012	AT4G22530	NA	NA	Yes	2.19911	1.53582	Chr4	11859003	11860208	+	1593	+	157	interaction142920	6457	27	0.070444	0	10	0.070444	1000	-16.2917	1246	133	-11.9952	1700	-26	-0.0569562	0.855355	0.0131529	0.985924
24225460	24225960	AT1G65210	Chr1	24224811	24225815	NA	Yes	Yes	0.525222	0.726049	24221912	24222412	AT1G65200	Yes	NA	Yes	1.73434	0.944762	Chr1	24218469	24222789	+	66	+	1060	interaction43477	3548	9	0.070444	0.193953	1	0.070444	100	-0.452312	46	1177	-11.9873	800	-4	NA	NA	-0.433593	NA
17708502	17709002	AT3G47965	Chr3	17707917	17708909	NA	NA	NA	0.21757	0.217636	17697401	17697901	AT3G47950	NA	NA	Yes	0.453849	0.586179	Chr3	17692701	17697999	+	470	+	66	interaction114040	11101	9	0.070444	0.193953	1	0.070444	100	-0.452312	464	46	-11.9873	800	-4	0.402338	0.339175	-0.374455	0.285264
23283624	23284124	AT3G63000	Chr3	23283608	23285540	NA	Yes	NA	0.422674	0.361006	23266108	23266608	AT3G62950	NA	Yes	Yes	4.49125	8.44467	Chr3	23266248	23266934	+	62	+	1498	interaction124932	17516	9	0.070444	0.188998	1	0.070444	100	-0.452312	46	1266	-11.9873	800	-4	-0.0674711	0.811084	0.82875	0.526368
3397914	3398414	AT1G10370	Chr1	3397080	3398358	NA	NA	Yes	0.802604	0.937541	3396441	3396941	AT1G10360	NA	NA	NA	0.499299	0.404205	Chr1	3395557	3396849	+	431	+	1524	interaction6237	1473	72	0.070444	0	42	0.070444	4200	-121.335	332	1500	-11.9826	3000	-96	-0.044279	0.89754	0.0729141	0.802146
2789494	2789994	AT5G08600	Chr5	2786186	2790241	NA	NA	Yes	0.266481	0.3716	2783498	2783998	AT5G08590	NA	NA	Yes	0.137538	0.22238	Chr5	2783330	2786094	+	97	+	1629	interaction161216	5996	31	0.070444	0	13	0.070444	1300	-24.1995	97	1219	-11.9781	1800	-32	-0.102011	0.866697	-0.0488677	0.864289
316447	316947	AT3G01910	Chr3	314693	317431	NA	Yes	NA	0.810991	0.455496	302012	302512	AT3G01850	NA	NA	NA	0.166203	0.31191	Chr3	299986	302038	+	1785	+	153	interaction89483	14435	12	0.070444	0.000217	2	0.070444	200	-1.3309	1783	137	-11.9764	1000	-8	-0.0178318	0.951798	0.0855961	0.758198
13738406	13738906	AT4G27480	Chr4	13736834	13738975	NA	NA	Yes	0.136607	0.235554	13735464	13735964	AT4G27470	NA	NA	NA	0.161521	0.221232	Chr4	13734998	13736518	+	218	+	1268	interaction147702	2942	46	0.070444	0	23	0.070444	2300	-53.9281	178	1409	-11.9762	2300	-54	-0.0193592	0.983783	0.299545	0.38391
6870393	6870893	AT4G11290	Chr4	6869952	6871661	NA	NA	Yes	0.152991	0.245131	6854133	6854633	AT4G11270	NA	NA	NA	0.146384	0.230527	Chr4	6854363	6859664	+	696	+	55	interaction131655	16260	9	0.070444	0.178231	1	0.070444	100	-0.452448	731	47	-11.9759	800	-4	-0.0192133	0.964027	-0.24048	0.159138
27576557	27577057	AT1G73350	Chr1	27575492	27577275	NA	NA	NA	1.58623	0.494167	27574028	27574528	AT1G73340	NA	NA	Yes	0.130459	0.215151	Chr1	27573115	27575419	+	47	+	1119	interaction52761	2529	13	0.070444	6e-06	3	0.070444	300	-2.65654	10	1608	-11.9708	1000	-8	0.0920854	0.812707	0.919864	0.00287055
6553495	6553995	AT3G19000	Chr3	6553528	6555147	NA	Yes	NA	4.61462	1.1123	6546372	6546872	AT3G18980	NA	NA	Yes	0.287044	0.462666	Chr3	6546462	6548062	+	200	+	1728	interaction99539	7123	12	0.070444	0.000235	2	0.070444	200	-1.3309	140	1420	-11.9702	1000	-8	-0.0996014	0.674227	0.104566	0.730418
8858563	8859063	AT2G20580	Chr2	8858987	8864865	NA	Yes	NA	0.238366	0.322373	8850105	8850605	AT2G20562	NA	NA	NA	0.302319	0.423439	Chr2	8850206	8850929	+	1160	+	58	interaction65768	8458	9	0.070444	0.183177	1	0.070444	100	-0.452578	1023	48	-11.965	800	-4	-0.319364	0.0207915	-0.135922	0.823594
20604418	20604918	AT3G55560	Chr3	20604615	20606380	NA	NA	NA	0.198092	0.352473	20597401	20597901	AT3G55530	Yes	NA	Yes	0.260615	0.314899	Chr3	20595125	20597603	+	157	+	551	interaction119982	7017	12	0.070444	0.000219	2	0.070444	200	-1.3309	146	359	-11.9587	1000	-8	0.195169	0.375032	0.0852873	0.801426
4128514	4129014	AT1G12170	Chr1	4128606	4129701	NA	NA	Yes	5.46771	4.577	4126424	4126924	AT1G12160	NA	NA	Yes	5.05199	3.43852	Chr1	4126065	4128310	+	1472	+	1691	interaction7966	2090	78	0.12873	0	48	0.1351	2502.81	-142.389	1486	1903	-11.9582	1765.52	-104	NA	NA	0.349313	0.303605
1329986	1330486	AT4G03010	Chr4	1329951	1331139	NA	NA	Yes	0.138866	0.219626	1317931	1318431	AT4G02970	NA	NA	NA	0.155463	0.300858	Chr4	1317498	1319179	+	163	+	892	interaction127689	12055	12	0.070444	0.000222	2	0.070444	200	-1.3309	147	1014	-11.9568	1000	-8	-0.340336	0.447061	0.141925	0.945815
17573544	17574044	AT4G37380	Chr4	17572039	17573938	NA	Yes	Yes	6.92296	3.77801	17568518	17569018	AT4G37360	NA	Yes	Yes	1.07272	2.01033	Chr4	17567123	17568858	+	985	+	136	interaction153483	5026	12	0.070444	0.000209	2	0.070444	200	-1.3309	780	154	-11.9447	1000	-8	-0.081835	0.859298	NA	NA
2829997	2830497	AT5G08695	Chr5	2829192	2834695	NA	Yes	Yes	9.67502	9.41781	2825947	2826447	AT5G08690	NA	Yes	Yes	0.186059	0.300394	Chr5	2825712	2828662	+	696	+	62	interaction161241	4050	9	0.070444	0.188998	1	0.070444	100	-0.452824	888	50	-11.9446	800	-4	NA	NA	-0.253625	0.0570103
5678014	5678514	AT5G17262	Chr5	5678376	5678508	NA	NA	Yes	0.514633	0.308381	5676868	5677368	AT5G17260	NA	NA	Yes	4.65342	3.6781	Chr5	5675322	5677912	+	836	+	106	interaction165640	1146	9	0.070444	0.221532	1	0.070444	100	-0.452824	978	50	-11.9446	800	-4	NA	NA	-0.195686	0.858987
12182016	12182516	AT4G23300	Chr4	12181931	12184704	NA	NA	Yes	4.06752	1.11635	12180482	12180982	AT4G23290	NA	NA	Yes	1.01417	0.72238	Chr4	12177737	12180826	+	242	+	1909	interaction144062	1534	41	0.070444	0	19	0.070444	1900	-40.9414	242	1866	-11.9434	2200	-46	-0.181446	0.404637	-0.395909	0.00670432
15634959	15635459	AT5G39050	Chr5	15634585	15636065	NA	NA	Yes	6.62309	12.5146	15626543	15627043	AT5G39040	NA	NA	NA	0.165571	0.205581	Chr5	15625577	15629802	+	1903	+	120	interaction177758	8416	12	0.070444	0.000199	2	0.070444	200	-1.3309	1650	155	-11.9431	1000	-8	0.249622	0.402605	-0.0340201	0.918355
15112947	15113447	AT2G35990	Chr2	15112083	15116776	NA	NA	Yes	0.174355	0.292463	15110323	15110823	AT2G35980	NA	NA	Yes	7.86882	6.78629	Chr2	15110587	15111471	+	88	+	1285	interaction79083	2624	18	0.070444	0	5	0.070444	500	-5.70289	70	1460	-11.9376	1300	-14	-0.767534	0.424027	1.25234	0.00295997
17711518	17712018	AT2G42540	Chr2	17711031	17712330	NA	Yes	Yes	0.131826	0.203287	17709884	17710384	AT2G42530	NA	NA	Yes	0.984966	1.41867	Chr2	17709035	17709945	+	650	+	86	interaction84577	1634	9	0.070444	0.211312	1	0.070444	100	-0.452939	405	51	-11.9351	800	-4	-0.391446	0.786404	-0.407025	0.640324
20860963	20861463	AT3G56230	Chr3	20860777	20862265	NA	NA	Yes	0.179874	0.261807	20859005	20859505	AT3G56220	NA	NA	Yes	8.09101	9.49074	Chr3	20858917	20860531	+	228	+	768	interaction120255	1958	12	0.070444	0.000242	2	0.070444	200	-1.3309	171	607	-11.9195	1000	-8	0.269604	0.557095	0.200432	0.853353
3950982	3951482	AT1G11710	Chr1	3948713	3951359	NA	NA	NA	0.118037	0.221534	3938635	3939135	AT1G11680	NA	NA	Yes	0.206356	0.261414	Chr1	3938500	3940754	+	1043	+	61	interaction7536	12347	9	0.070444	0.187613	1	0.070444	100	-0.453156	1074	53	-11.9171	800	-4	-0.147848	0.829753	-0.104716	0.663315
6278116	6278616	AT1G18250	Chr1	6276787	6278150	NA	NA	Yes	0.783932	1.00899	6268627	6269127	AT1G18210	NA	NA	Yes	0.424106	0.573055	Chr1	6266608	6268828	+	58	+	961	interaction12060	9489	9	0.070444	0.183177	1	0.070444	100	-0.453156	53	890	-11.9171	800	-4	-0.327663	0.186909	0.239781	0.142968
835504	836004	AT5G03390	Chr5	834987	836751	NA	NA	Yes	3.85451	2.92789	821530	822030	AT5G03360	NA	Yes	Yes	0.298653	0.572244	Chr5	817863	825149	+	1588	+	69	interaction156922	13974	9	0.070444	0.19731	1	0.070444	100	-0.453156	1686	53	-11.9171	800	-4	-0.446892	0.369467	0.0917939	NA
25332939	25333439	AT5G63160	Chr5	25333262	25335485	NA	NA	NA	2.76515	0.83921	25329093	25329593	AT5G63140	NA	NA	Yes	1.07296	0.646646	Chr5	25328118	25329799	+	60	+	521	interaction196123	3846	9	0.070444	0.186206	1	0.070444	100	-0.453156	53	518	-11.9171	800	-4	1.05304	0.15249	0.121792	0.779856
11732382	11732882	AT4G22150	Chr4	11731137	11732901	Yes	NA	Yes	0.647728	1.01016	11730492	11730992	AT4G22140	NA	NA	NA	0.192958	0.260281	Chr4	11727725	11730509	+	1375	+	223	interaction142539	1890	24	0.070444	0	8	0.070444	800	-11.5882	1139	217	-11.9133	1600	-22	0.0254211	0.943711	0.00710691	0.986368
17883589	17884089	AT3G48290	Chr3	17882555	17884270	NA	NA	Yes	2.95852	1.26858	17877027	17877527	AT3G48270	NA	NA	Yes	11.2034	15.974	Chr3	17876570	17878173	+	140	+	1619	interaction114360	6562	12	0.070444	0.000211	2	0.070444	200	-1.3309	176	1749	-11.913	1000	-8	-0.030795	0.975339	-0.214409	NA
29196885	29197385	AT1G77682	Chr1	29196542	29197071	NA	NA	Yes	0.205243	0.293188	29195036	29195536	AT1G77680	NA	NA	Yes	0.178488	0.293989	Chr1	29191833	29196287	+	79	+	919	interaction55942	1849	9	0.070444	0.206454	1	0.070444	100	-0.453259	54	918	-11.9087	800	-4	NA	NA	-0.292507	0.222011
9760415	9760915	AT2G22930	Chr2	9759672	9761163	Yes	NA	Yes	2.43754	2.78192	9757547	9758047	AT2G22920	NA	NA	Yes	1.37391	0.343088	Chr2	9753630	9757600	+	1232	+	80	interaction67194	2868	14	0.070444	1e-06	3	0.070444	300	-2.54188	1140	59	-11.9076	1100	-10	0.338676	0.337003	0.236508	0.411021
25986948	25987448	AT5G65060	Chr5	25987428	25991315	NA	NA	NA	0.155799	0.248708	25982179	25982679	AT5G65050	NA	NA	NA	0.114499	0.173868	Chr5	25982253	25986326	+	168	+	1207	interaction197126	4769	22	0.070444	0	7	0.070444	700	-9.51073	134	992	-11.9072	1500	-18	0.195949	0.507481	0.0962866	0.714205
10466476	10466976	AT3G28130	Chr3	10465515	10468911	NA	NA	NA	11.6956	10.7615	10455138	10455638	AT3G28080	NA	NA	Yes	0.976873	0.258316	Chr3	10451485	10455267	+	963	+	256	interaction108344	11338	12	0.070444	0.000248	2	0.070444	200	-1.3309	783	181	-11.9069	1000	-8	-0.290554	0.158736	-0.492225	0.0418979
22836987	22837487	AT5G56370	Chr5	22835981	22837941	Yes	NA	Yes	1.75505	1.68509	22835077	22835577	AT5G56369	Yes	NA	Yes	8.36164	0.954617	Chr5	22835445	22835823	+	1477	+	143	interaction191841	1910	28	0.070444	0	11	0.070444	1100	-18.9159	1801	95	-11.9054	1700	-28	2.91671	7.54e-48	1.96386	NA
19457474	19457974	AT1G52240	Chr1	19455765	19459586	NA	NA	NA	0.219413	0.330744	19453943	19454443	AT1G52220	NA	NA	NA	0.395142	0.391728	Chr1	19453568	19454697	+	758	+	1585	interaction31406	3531	29	0.070444	0	14	0.087234	1130.53	-26.1976	1050	1739	-11.9027	1769.47	-28	-0.398509	0.513116	-0.198356	0.22438
19984614	19985114	AT3G53965	Chr3	19984940	19985011	NA	NA	Yes	0.127282	0.200307	19980070	19980570	AT3G53960	NA	NA	Yes	0.8603	0.762799	Chr3	19978121	19980959	+	109	+	1260	interaction118900	4544	18	0.070444	0	5	0.070444	500	-5.70024	72	896	-11.9024	1300	-14	NA	NA	0.8467	0.000862281
13714456	13714956	AT4G27420	Chr4	13712198	13714797	Yes	NA	Yes	0.226699	0.435971	13707487	13707987	AT4G27410	NA	NA	NA	0.287218	0.304747	Chr4	13707239	13709149	+	865	+	90	interaction147602	6969	16	0.070444	0	4	0.070444	400	-4.01941	844	60	-11.9009	1200	-12	-0.214409	NA	1.37672	5.44e-15
29968952	29969452	AT1G79640	Chr1	29966710	29971600	NA	NA	NA	8.62153	7.04736	29964952	29965452	AT1G79630	NA	NA	NA	0.118568	0.209677	Chr1	29962644	29965795	+	46	+	474	interaction57839	4000	9	0.070444	0.159828	1	0.070444	100	-0.453454	56	440	-11.8927	800	-4	-0.223289	0.534913	-0.0832474	0.776235
2548596	2549096	AT4G04985	Chr4	2548994	2549471	NA	NA	Yes	0.14922	0.260741	2533211	2533711	AT4G04960	NA	NA	NA	0.140706	0.245165	Chr4	2533055	2535386	+	56	+	1556	interaction129068	15385	9	0.070444	0.179936	1	0.070444	100	-0.453454	56	1503	-11.8927	800	-4	NA	NA	0.498313	0.00217413
1295977	1296477	AT5G04540	Chr5	1296441	1302444	NA	NA	NA	0.25908	0.276049	1293391	1293891	AT5G04530	NA	NA	Yes	3.16554	4.1301	Chr5	1291821	1293688	+	73	+	345	interaction157977	2586	9	0.070444	0.201338	1	0.070444	100	-0.453454	56	222	-11.8927	800	-4	0.161083	0.425943	0.182036	0.698206
17717493	17717993	AT3G48000	Chr3	17716866	17720020	NA	NA	NA	2.92062	0.584546	17715999	17716499	AT3G47990	NA	NA	Yes	0.39721	0.414211	Chr3	17713143	17716308	+	143	+	956	interaction114075	1494	27	0.070444	0	10	0.070444	1000	-16.2659	146	861	-11.8907	1700	-26	0.277542	0.0389342	-0.0319137	0.922939
1008921	1009421	AT2G03330	Chr2	1008459	1014122	NA	NA	Yes	4.96455	3.84312	1007527	1008027	AT2G03320	NA	NA	Yes	2.1488	2.22471	Chr2	1007381	1007945	+	1470	+	923	interaction59547	1394	90	0.070444	0	55	0.070444	5500	-171.171	1525	788	-11.8889	3500	-126	0.00956176	0.984986	0.349131	NA
6357931	6358431	AT2G14810	Chr2	6357464	6358470	NA	NA	Yes	1.99772	2.80645	6355477	6355977	AT2G14800	NA	NA	NA	0.127258	0.179512	Chr2	6355181	6357375	+	741	+	55	interaction61667	2454	9	0.070444	0.178231	1	0.070444	100	-0.453634	821	58	-11.878	800	-4	NA	NA	-0.13889	0.917124
9059980	9060480	AT3G24810	Chr3	9060895	9061998	NA	NA	NA	0.142367	0.210198	9053426	9053926	AT3G24790	Yes	NA	Yes	3.19976	2.0511	Chr3	9052981	9054531	+	54	+	1125	interaction105291	6554	9	0.070444	0.176492	1	0.070444	100	-0.453634	58	1044	-11.878	800	-4	-0.318372	0.573396	1.21356	NA
21385466	21385966	AT1G57750	Chr1	21383980	21385709	NA	NA	Yes	2.4497	1.90048	21379948	21380448	AT1G57720	NA	NA	Yes	0.23569	0.289274	Chr1	21377614	21380382	+	879	+	76	interaction36088	5518	9	0.070444	0.204066	1	0.070444	100	-0.45372	1073	59	-11.871	800	-4	-2.52372	NA	-0.0801086	0.724222
17732988	17733488	AT5G44065	Chr5	17733484	17733712	NA	NA	NA	3.26166	4.03609	17723001	17723501	AT5G44050	NA	NA	Yes	0.313575	0.263544	Chr5	17722483	17726379	+	57	+	1677	interaction182009	9987	9	0.070444	0.18159	1	0.070444	100	-0.45372	59	1593	-11.871	800	-4	1.05504	0.490967	0.621952	2.37e-05
7333479	7333979	AT4G12380	Chr4	7333510	7334469	NA	NA	Yes	0.251259	0.276245	7331974	7332474	AT4G12370	NA	NA	Yes	12.7936	10.5206	Chr4	7331971	7332874	+	1026	+	184	interaction132978	1505	38	0.070444	0	17	0.070444	1700	-34.9815	834	232	-11.8679	2100	-42	3.52904	NA	-0.260867	0.925744
7179939	7180439	AT3G20557	Chr3	7180036	7181079	NA	NA	Yes	0.294043	0.349102	7177503	7178003	AT3G20550	NA	Yes	Yes	0.30585	0.487507	Chr3	7174463	7177942	+	107	+	1596	interaction100287	2436	9	0.070444	0.221937	1	0.070444	100	-0.453803	60	1666	-11.8643	800	-4	0.156455	0.940263	0.111656	0.638817
15997465	15997965	AT2G38180	Chr2	15997113	15998906	NA	NA	Yes	0.178564	0.344772	15985986	15986486	AT2G38160	NA	NA	Yes	0.176256	0.312572	Chr2	15986427	15988659	+	1734	+	116	interaction80772	11479	23	0.070444	0	8	0.070444	800	-11.7942	1548	73	-11.8631	1500	-20	0.0216536	0.964214	-0.303858	0.580009
18177886	18178386	AT3G49040	Chr3	18177675	18179339	NA	NA	Yes	0.185326	0.226198	18174174	18174674	AT3G49030	Yes	NA	Yes	4.06524	1.16764	Chr3	18173086	18174947	+	74	+	394	interaction115012	3712	9	0.070444	0.2023	1	0.070444	100	-0.453883	61	561	-11.8577	800	-4	NA	NA	NA	NA
11240654	11241154	AT1G31380	Chr1	11240450	11241099	NA	NA	Yes	1.79145	1.3738	11236022	11236522	AT1G31360	NA	NA	NA	0.149667	0.194052	Chr1	11232332	11237530	+	1073	+	111	interaction21899	4632	25	0.070444	0	9	0.070444	900	-13.9857	1473	102	-11.8472	1600	-24	2.68836	NA	-0.177024	0.572124
26424548	26425048	AT5G66080	Chr5	26423418	26425406	NA	NA	Yes	0.248227	0.345321	26422468	26422968	AT5G66070	NA	NA	NA	0.145593	0.24496	Chr5	26421854	26423240	+	1169	+	120	interaction197716	2080	25	0.070444	0	9	0.070444	900	-13.9857	1124	102	-11.8472	1600	-24	0.630822	0.0296665	0.429691	0.122586
9881994	9882494	AT4G17785	Chr4	9881634	9883432	Yes	NA	Yes	0.169695	0.255	9880988	9881488	AT4G17780	Yes	NA	Yes	4.01831	2.144	Chr4	9880258	9881455	+	403	+	1453	interaction138285	1006	71	0.070444	0	41	0.070444	4100	-117.013	404	1462	-11.846	3000	-94	-0.0979137	0.959864	NA	NA
3552836	3553336	AT5G11170	Chr5	3553116	3556977	NA	NA	NA	0.17658	0.248402	3550534	3551034	AT5G11160	NA	NA	Yes	0.156159	0.235787	Chr5	3550519	3552207	+	653	+	316	interaction162840	2302	12	0.070444	0.000258	2	0.070444	200	-1.33089	538	255	-11.8452	1000	-8	-0.070038	0.766125	0.483325	0.0470586
14197466	14197966	AT5G36110	Chr5	14195376	14197613	Yes	NA	Yes	0.237884	0.336805	14193578	14194078	AT5G36100	Yes	NA	Yes	4.11304	1.10953	Chr5	14191710	14194176	+	73	+	605	interaction175006	3888	16	0.070444	0	4	0.070444	400	-4.01669	63	635	-11.8425	1200	-12	0.515564	0.329306	1.30001	0.247422
20148056	20148556	AT1G53970	Chr1	20148418	20148898	Yes	NA	Yes	0.166823	0.25167	20144473	20144973	AT1G53940	Yes	NA	Yes	3.23623	1.17484	Chr1	20143278	20145780	+	449	+	62	interaction33037	3583	9	0.070444	0.188998	1	0.070444	100	-0.454109	468	64	-11.8395	800	-4	0.208135	0.943547	1.89783	0.000660603
16835339	16835839	AT5G42130	Chr5	16835298	16836839	NA	NA	Yes	3.32633	1.72054	16831931	16832431	AT5G42110	NA	NA	Yes	0.145221	0.264311	Chr5	16831727	16832279	+	1133	+	111	interaction180709	3408	20	0.070444	0	6	0.070444	600	-7.53304	1433	101	-11.8325	1400	-16	-0.057416	0.841833	0.241163	0.395425
14725990	14726490	AT5G37190	Chr5	14723143	14726694	NA	NA	Yes	12.9194	13.7878	14718902	14719402	AT5G37180	Yes	NA	Yes	2.56765	0.869773	Chr5	14718237	14722913	+	66	+	1153	interaction175245	7088	14	0.070444	1e-06	3	0.070444	300	-2.54029	64	1243	-11.8319	1100	-10	0.0199881	0.962073	-0.481756	0.217164
19139399	19139899	AT3G51610	Chr3	19139551	19142085	NA	Yes	NA	3.78838	3.36419	19132935	19133435	AT3G51580	NA	NA	NA	0.148063	0.256827	Chr3	19130767	19133347	+	757	+	1055	interaction117128	6464	26	0.070444	0	9	0.070444	900	-13.7361	783	740	-11.828	1700	-24	0.192806	0.331179	0.18251	0.469317
25651122	25651622	AT1G68410	Chr1	25649998	25653019	NA	NA	NA	0.165138	0.233474	25647828	25648328	AT1G68400	NA	Yes	Yes	0.66886	0.985173	Chr1	25646038	25648946	+	66	+	546	interaction48233	3294	9	0.070444	0.193953	1	0.070444	100	-0.454314	67	509	-11.823	800	-4	0.661916	3.54e-07	0.338185	0.308715
7232382	7232882	AT3G20690	Chr3	7231569	7232682	Yes	NA	Yes	0.254787	0.233049	7230450	7230950	AT3G20680	NA	NA	Yes	0.316072	0.440107	Chr3	7230067	7231194	+	1169	+	250	interaction100422	1932	49	0.070444	0	25	0.070444	2500	-60.2266	987	228	-11.8184	2400	-58	NA	NA	0.165924	0.58194
17496988	17497488	AT2G41910	Chr2	17496955	17498077	NA	NA	Yes	7.91053	2.10958	17496111	17496611	AT2G41905	NA	NA	NA	0.207986	0.227566	Chr2	17495679	17496142	+	409	+	96	interaction83995	877	9	0.070444	0.216962	1	0.070444	100	-0.454379	335	68	-11.8178	800	-4	NA	NA	0.29746	0.577084
22086060	22086560	AT5G54390	Chr5	22085997	22088017	NA	NA	NA	0.167957	0.206604	22075525	22076025	AT5G54370	NA	NA	Yes	5.0062	6.58093	Chr5	22075282	22076777	+	82	+	1083	interaction190529	10535	9	0.070444	0.208687	1	0.070444	100	-0.454379	68	1233	-11.8178	800	-4	-0.00317452	0.994875	0.750169	0.36494
4550477	4550977	AT3G13820	Chr3	4549615	4550863	NA	NA	Yes	9.58113	7.93388	4539031	4539531	AT3G13800	NA	NA	NA	0.131037	0.192197	Chr3	4538766	4541487	+	851	+	68	interaction96566	11446	9	0.070444	0.196225	1	0.070444	100	-0.454561	1022	71	-11.8033	800	-4	1.81723	NA	-0.184041	0.522013
5820989	5821489	AT5G17670	Chr5	5821059	5822736	NA	NA	NA	4.56439	5.49917	5812023	5812523	AT5G17640	NA	NA	NA	0.140897	0.236259	Chr5	5810934	5813284	+	995	+	94	interaction166049	8966	9	0.070444	0.215892	1	0.070444	100	-0.454561	853	71	-11.8033	800	-4	-0.046186	0.878585	0.488323	0.00189564
11000488	11000988	AT2G25790	Chr2	11000598	11004235	Yes	NA	Yes	0.614851	1.0002	10993503	10994003	AT2G25770	NA	NA	Yes	10.6736	15.0278	Chr2	10992807	10993652	+	1106	+	467	interaction69290	6985	12	0.070444	0.000271	2	0.070444	200	-1.33089	1259	359	-11.8021	1000	-8	-0.342617	0.0393404	2.26751	3.92e-06
6617535	6618035	AT1G19170	Chr1	6616642	6618986	NA	Yes	Yes	0.56165	0.981732	6614408	6614908	AT1G19160	NA	Yes	Yes	2.34941	3.83592	Chr1	6614161	6615214	+	296	+	1015	interaction12531	3127	12	0.070444	0.000255	2	0.070444	200	-1.33089	361	953	-11.8015	1000	-8	-0.211444	0.380162	-0.0735913	0.981415
14879494	14879994	AT4G30430	Chr4	14878782	14880331	NA	NA	Yes	2.71393	0.41437	14877563	14878063	AT4G30420	Yes	NA	Yes	2.10929	0.556605	Chr4	14877068	14878914	+	153	+	634	interaction149411	1931	22	0.070444	0	7	0.070444	700	-9.49526	154	567	-11.7998	1500	-20	1.71358	0.0462329	0.0182183	0.985276
5139021	5139521	AT1G14900	Chr1	5138333	5139432	NA	Yes	NA	0.282539	0.432505	5137014	5137514	AT1G14890	NA	Yes	Yes	2.92721	4.6422	Chr1	5137013	5137957	+	138	+	1683	interaction10474	2007	60	0.070444	0	36	0.070444	3600	-103.112	106	1827	-11.7987	2400	-80	0.165958	0.487187	0.275543	0.304477
19158975	19159475	AT1G51680	Chr1	19158751	19161552	NA	NA	Yes	1.10607	1.01803	19156948	19157448	AT1G51670	NA	NA	Yes	0.167644	0.227501	Chr1	19156503	19158749	+	158	+	531	interaction30221	2027	22	0.070444	0	7	0.070444	700	-9.49459	155	443	-11.7952	1500	-18	-0.423021	0.000714074	0.198102	0.894433
13722953	13723453	AT2G32300	Chr2	13722426	13723590	NA	NA	Yes	0.126957	0.219549	13719543	13720043	AT2G32295	NA	NA	NA	0.167759	0.235502	Chr2	13719297	13722179	+	1170	+	92	interaction75505	3410	18	0.070444	0	5	0.070444	500	-5.69205	1453	79	-11.7949	1300	-14	0.0106778	0.979047	-0.317535	0.19316
8177529	8178029	AT4G14170	Chr4	8176323	8178142	NA	NA	Yes	8.78166	11.4298	8175442	8175942	AT4G14165	Yes	NA	Yes	5.37736	3.3159	Chr4	8174597	8175715	+	86	+	1033	interaction134535	2087	18	0.070444	0	5	0.070444	500	-5.69205	79	952	-11.7949	1300	-14	0.0330304	0.975895	1.57231	NA
29485037	29485537	AT1G78370	Chr1	29484268	29485290	NA	NA	Yes	0.216275	0.294344	29461506	29462006	AT1G78300	NA	NA	NA	0.170591	0.330836	Chr1	29461670	29463385	+	1562	+	91	interaction56398	23531	9	0.070444	0.214325	1	0.070444	100	-0.454674	1589	73	-11.7942	800	-4	-0.559411	0.0415056	-0.103487	0.682355
16281512	16282012	AT4G33970	Chr4	16279794	16281894	NA	NA	NA	0.700817	0.456919	16267490	16267990	AT4G33940	NA	Yes	NA	0.167553	0.290956	Chr4	16266022	16267786	+	1615	+	82	interaction150858	14022	9	0.070444	0.208687	1	0.070444	100	-0.454674	1998	73	-11.7942	800	-4	0.705209	NA	0.666947	1.45e-05
2054951	2055451	AT5G06670	Chr5	2048242	2055019	NA	NA	NA	0.201512	0.308075	2046621	2047121	AT5G06660	NA	NA	Yes	0.260954	0.352634	Chr5	2046809	2047794	+	788	+	1189	interaction159615	8330	12	0.070444	0.000283	2	0.070444	200	-1.33089	390	895	-11.7937	1000	-8	-0.222588	0.383919	-0.00260248	0.994875
14945572	14946072	AT2G35605	Chr2	14946062	14947276	NA	NA	NA	0.134691	0.228252	14944804	14945304	AT2G35600	NA	NA	Yes	0.438885	0.395227	Chr2	14940844	14945357	+	443	+	1537	interaction78630	768	12	0.070444	0.00027	2	0.070444	200	-1.33089	400	1476	-11.7913	1000	-8	0.0640106	0.867186	-0.0795897	0.938371
18672931	18673431	AT3G50350	Chr3	18672101	18674022	Yes	NA	Yes	0.29147	0.297011	18666358	18666858	AT3G50340	NA	NA	Yes	0.25697	0.290117	Chr3	18665093	18666672	+	1150	+	97	interaction116012	6573	9	0.070444	0.217464	1	0.070444	100	-0.454728	933	74	-11.7899	800	-4	0.321377	0.207934	0.192556	0.452186
22266458	22266958	AT5G54810	Chr5	22264593	22266785	NA	NA	NA	0.163168	0.301975	22262014	22262514	AT5G54800	NA	NA	Yes	2.0536	2.82568	Chr5	22261270	22263921	+	80	+	1079	interaction191106	4444	9	0.070444	0.207248	1	0.070444	100	-0.454728	74	986	-11.7899	800	-4	0.156935	0.37589	-0.302252	0.159303
16736651	16737151	AT4G35170	Chr4	16736756	16738437	Yes	NA	Yes	1.53798	1.29125	16731473	16731973	AT4G35160	NA	NA	Yes	7.41665	10.7812	Chr4	16730759	16732811	+	1475	+	117	interaction151858	5178	9	0.070444	0.225532	1	0.070444	100	-0.454781	1284	75	-11.7857	800	-4	0.205404	0.946748	0.604122	0.000656364
17942086	17942586	AT5G44550	Chr5	17941874	17943213	Yes	NA	Yes	0.176332	0.268288	17937486	17937986	AT5G44530	NA	NA	Yes	0.392169	0.340331	Chr5	17937688	17941292	+	519	+	99	interaction182554	4600	9	0.070444	0.218481	1	0.070444	100	-0.454781	603	75	-11.7857	800	-4	0.235329	0.291077	-0.569682	8.17e-05
18148426	18148926	AT3G48950	Chr3	18148016	18149987	NA	NA	Yes	0.373856	0.248004	18130523	18131023	AT3G48890	NA	NA	NA	0.171354	0.283191	Chr3	18129600	18131573	+	1876	+	75	interaction114799	17903	9	0.070444	0.203183	1	0.070444	100	-0.454833	1984	76	-11.7816	800	-4	NA	NA	0.16619	0.387827
10652020	10652520	AT4G19530	Chr4	10651743	10657282	NA	NA	Yes	1.1286	0.491518	10645984	10646484	AT4G19520	NA	NA	Yes	2.54711	3.07985	Chr4	10639268	10647079	+	592	+	77	interaction140089	6036	9	0.070444	0.20489	1	0.070444	100	-0.454833	641	76	-11.7816	800	-4	0.711296	9.43e-05	2.03633	0.000319624
18727522	18728022	AT2G45430	Chr2	18727560	18728935	NA	Yes	Yes	0.790296	0.361164	18719456	18719956	AT2G45420	NA	Yes	Yes	11.6176	17.7485	Chr2	18718347	18720729	+	551	+	489	interaction86545	8066	12	0.070444	0.000272	2	0.070444	200	-1.33089	463	481	-11.7785	1000	-8	0.262172	0.246462	-0.337402	0.715003
1886558	1887058	AT5G06230	Chr5	1884927	1887121	NA	NA	Yes	0.16386	0.258597	1876092	1876592	AT5G06190	NA	NA	NA	0.168469	0.256589	Chr5	1875788	1876782	+	1676	+	82	interaction159172	10466	9	0.070444	0.208687	1	0.070444	100	-0.454883	1850	77	-11.7777	800	-4	-0.175224	0.781898	0.0559041	0.943547
15347043	15347543	AT4G31700	Chr4	15346071	15347727	NA	Yes	NA	0.190489	0.245474	15345542	15346042	AT4G31695	NA	NA	NA	0.108363	0.113151	Chr4	15345711	15345747	+	1288	+	98	interaction149731	1501	27	0.070444	0	11	0.070444	1100	-19.3284	1264	54	-11.7775	1600	-26	-0.0634518	0.794951	NA	NA
18917610	18918110	AT3G50900	Chr3	18918018	18918618	NA	NA	Yes	0.165237	0.237694	18914555	18915055	AT3G50880	NA	NA	NA	0.576319	0.464773	Chr3	18913485	18914960	+	1556	+	149	interaction116489	3055	31	0.070444	0	13	0.070444	1300	-24.1288	1358	107	-11.7749	1800	-32	0.0942872	0.884987	0.00770625	0.986368
6019988	6020488	AT3G17600	Chr3	6020024	6021142	NA	NA	Yes	0.397145	0.510626	6018946	6019446	AT3G17590	NA	NA	Yes	0.194991	0.243615	Chr3	6017211	6019666	+	895	+	113	interaction98390	1042	9	0.070444	0.224174	1	0.070444	100	-0.454931	744	78	-11.7738	800	-4	0.231938	0.838003	0.0920394	0.81324
19013485	19013985	AT3G51180	Chr3	19013389	19016185	NA	Yes	Yes	0.142918	0.205998	19001031	19001531	AT3G51150	NA	NA	NA	0.135954	0.236311	Chr3	19000855	19006769	+	88	+	2001	interaction116817	12454	9	0.070444	0.212549	1	0.070444	100	-0.454931	78	2058	-11.7738	800	-4	0.0939077	0.876519	0.0430027	0.912398
12048184	12048684	AT4G22990	Chr4	12048185	12051796	NA	NA	NA	0.185546	0.287996	12043070	12043570	AT4G22970	NA	NA	Yes	0.115626	0.210115	Chr4	12033436	12043728	+	66	+	594	interaction143314	5114	9	0.070444	0.193953	1	0.070444	100	-0.454931	78	481	-11.7738	800	-4	0.325947	0.110176	-0.419292	0.214244
10062927	10063427	AT1G28630	Chr1	10058455	10063460	Yes	NA	Yes	1.70897	0.392954	10044993	10045493	AT1G28580	NA	NA	NA	0.193826	0.225779	Chr1	10044336	10046442	+	1994	+	75	interaction19448	17934	9	0.070444	0.203183	1	0.070444	100	-0.454979	1852	79	-11.77	800	-4	2.68836	NA	0.411268	0.000512005
28599585	28600085	AT1G76230	Chr1	28599759	28600442	NA	Yes	Yes	4.917	4.60077	28595028	28595528	AT1G76210	NA	Yes	Yes	7.57399	13.3522	Chr1	28594949	28595981	+	561	+	49	interaction54998	4557	9	0.070444	0.166663	1	0.070444	100	-0.454979	505	79	-11.77	800	-4	0.252779	0.914078	-0.2492	0.851383
7233549	7234049	AT4G12070	Chr4	7231821	7234501	NA	NA	NA	0.299765	0.204061	7229189	7229689	AT4G12060	NA	NA	Yes	0.548281	0.321585	Chr4	7228006	7229941	+	88	+	1340	interaction132510	4360	9	0.070444	0.212549	1	0.070444	100	-0.454979	79	1465	-11.77	800	-4	0.205598	0.552313	-0.178045	0.370467
23260456	23260956	AT1G62810	Chr1	23257725	23261966	NA	NA	Yes	0.142872	0.232375	23256962	23257462	AT1G62800	NA	NA	Yes	0.964688	0.325577	Chr1	23253702	23257463	+	110	+	907	interaction40845	3494	20	0.070444	0	6	0.070444	600	-7.52609	108	638	-11.7692	1400	-16	0.230167	0.298165	0.00336777	0.993907
1587496	1587996	AT1G05410	Chr1	1585370	1587778	NA	Yes	Yes	0.459636	0.673725	1584034	1584534	AT1G05400	NA	Yes	Yes	3.00809	5.75548	Chr1	1584072	1585421	+	1263	+	1255	interaction3245	3462	57	0.081974	0	24	0.070444	2400	-56.0004	997	1250	-11.7675	2498.27	-70	-0.045458	0.911168	-0.20071	0.871424
10198430	10198930	AT1G29179	Chr1	10198763	10200255	NA	NA	Yes	3.37545	2.60452	10194153	10194653	AT1G29170	NA	NA	Yes	0.332393	0.28864	Chr1	10190213	10194900	+	664	+	625	interaction19850	4277	12	0.070444	0.000278	2	0.070444	200	-1.33089	595	721	-11.7606	1000	-8	0.881314	0.26649	-0.364949	0.0477198
12016508	12017008	AT2G28190	Chr2	12014497	12016569	NA	NA	Yes	15.8431	28.4712	12009869	12010369	AT2G28170	NA	NA	Yes	3.43987	2.86122	Chr2	12006370	12009956	+	79	+	1256	interaction71108	6639	9	0.070444	0.206454	1	0.070444	100	-0.455115	82	897	-11.7593	800	-4	0.637662	2.04e-05	NA	NA
7044635	7045135	AT5G20810	Chr5	7043897	7045712	NA	Yes	Yes	0.155651	0.22604	7019442	7019942	AT5G20730	NA	NA	NA	0.166231	0.24639	Chr5	7016444	7022113	+	1586	+	67	interaction168727	25193	9	0.070444	0.195119	1	0.070444	100	-0.455115	1602	82	-11.7593	800	-4	0.741691	0.438039	-0.0157893	0.969416
7793373	7793873	AT3G22110	Chr3	7792637	7794165	NA	NA	NA	0.130824	0.214305	7789543	7790043	AT3G22104	NA	NA	NA	0.206417	0.250028	Chr3	7789375	7792380	+	1172	+	79	interaction102531	3830	14	0.070444	1e-06	3	0.070444	300	-2.53869	1129	70	-11.7568	1100	-10	-0.0251572	0.930522	-0.682149	1.05e-05
9928897	9929397	AT3G26934	Chr3	9928156	9929123	Yes	NA	Yes	2.819	2.5512	9918513	9919013	AT3G26910	NA	NA	NA	0.129691	0.244066	Chr3	9915110	9918784	+	778	+	94	interaction107504	10384	9	0.070444	0.215892	1	0.070444	100	-0.455158	788	83	-11.7559	800	-4	-0.162071	NA	0.469883	0.0218636
578438	578938	AT4G01410	Chr4	578164	579169	NA	Yes	Yes	1.74082	1.48419	574881	575381	AT4G01400	NA	NA	NA	0.216251	0.325106	Chr4	572996	577276	+	1127	+	96	interaction126153	3557	9	0.070444	0.216962	1	0.070444	100	-0.455158	1054	83	-11.7559	800	-4	0.347136	0.156773	-0.461315	0.540454
11733368	11733868	AT4G22160	Chr4	11733122	11734027	Yes	NA	Yes	0.647728	1.01016	11729440	11729940	AT4G22140	NA	NA	NA	0.192958	0.260281	Chr4	11727725	11730509	+	1670	+	109	interaction142552	3928	9	0.070444	0.222684	1	0.070444	100	-0.455158	1539	83	-11.7559	800	-4	0.478209	0.0365443	0.00710691	0.986368
25865594	25866094	AT1G68820	Chr1	25865659	25868985	NA	NA	Yes	2.74726	2.70371	25861503	25862003	AT1G68810	Yes	NA	Yes	15.0817	19.9166	Chr1	25861122	25863120	+	102	+	601	interaction48949	4091	9	0.070444	0.219849	1	0.070444	100	-0.4552	84	661	-11.7526	800	-4	0.0722611	0.854203	-0.229373	0.376973
2994375	2994875	AT1G09270	Chr1	2994368	2998222	NA	NA	NA	0.200103	0.263302	2976936	2977436	AT1G09210	NA	NA	NA	0.128713	0.195588	Chr1	2972841	2976750	+	1511	+	73	interaction5521	17439	9	0.070444	0.201338	1	0.070444	100	-0.455241	1266	85	-11.7494	800	-4	-0.0134076	0.966383	-0.116618	0.584588
12902507	12903007	AT2G30240	Chr2	12899906	12902779	NA	NA	Yes	0.308672	0.38746	12892462	12892962	AT2G30220	NA	NA	Yes	6.36955	6.89555	Chr2	12891265	12892537	+	81	+	896	interaction73520	10045	9	0.070444	0.207998	1	0.070444	100	-0.455241	85	836	-11.7494	800	-4	NA	NA	0.624857	0.705948
3032001	3032501	AT3G09880	Chr3	3029510	3032256	NA	NA	NA	9.55835	6.01835	3019524	3020024	AT3G09840	NA	NA	NA	0.133766	0.228379	Chr3	3019339	3023052	+	89	+	2022	interaction93925	12477	9	0.070444	0.213145	1	0.070444	100	-0.455241	85	1919	-11.7494	800	-4	0.142113	0.612873	-0.0817711	0.697657
12878998	12879498	AT1G35181	Chr1	12879305	12879470	Yes	NA	Yes	1.92729	0.62388	12871028	12871528	AT1G35170	Yes	NA	Yes	1.78489	0.712294	Chr1	12870737	12872194	+	1151	+	689	interaction24698	7970	12	0.070444	0.00028	2	0.070444	200	-1.33089	1348	746	-11.7479	1000	-8	NA	NA	-0.115458	NA
5505853	5506353	AT3G16240	Chr3	5505403	5507050	NA	Yes	Yes	8.41484	13.3743	5501533	5502033	AT3G16230	NA	NA	NA	0.115486	0.178132	Chr3	5500177	5503545	+	1078	+	82	interaction97574	4320	9	0.070444	0.208687	1	0.070444	100	-0.455281	953	86	-11.7462	800	-4	0.554844	0.377515	0.0988364	0.708697
19622395	19622895	AT5G48410	Chr5	19620266	19623425	NA	NA	Yes	0.214483	0.353538	19612011	19612511	AT5G48390	NA	NA	NA	0.142905	0.259531	Chr5	19612061	19615383	+	67	+	1248	interaction185679	10384	9	0.070444	0.195119	1	0.070444	100	-0.455281	86	1317	-11.7462	800	-4	-0.102497	0.895889	-0.429677	0.778848
18741453	18741953	AT2G45460	Chr2	18736827	18741841	NA	NA	NA	0.877714	0.489029	18731878	18732378	AT2G45440	NA	NA	Yes	0.191014	0.284477	Chr2	18730839	18733015	+	93	+	1053	interaction86624	9575	9	0.070444	0.215385	1	0.070444	100	-0.455358	88	1398	-11.7401	800	-4	0.0110865	0.984026	-0.162631	0.48418
1412927	1413427	AT4G03205	Chr4	1412784	1414902	NA	NA	NA	2.33309	1.73781	1401138	1401638	AT4G03170	NA	NA	Yes	4.81816	4.16858	Chr4	1400831	1401584	+	60	+	1596	interaction127860	11789	9	0.070444	0.186206	1	0.070444	100	-0.455432	90	1747	-11.7343	800	-4	-0.110599	0.78205	NA	NA
14876944	14877444	AT4G30420	Chr4	14877068	14878914	Yes	NA	Yes	9.06956	4.3979	14863049	14863549	AT4G30390	NA	NA	NA	0.198159	0.250087	Chr4	14862008	14863185	+	1155	+	93	interaction149359	13895	9	0.070444	0.215385	1	0.070444	100	-0.455432	1222	90	-11.7343	800	-4	0.0182183	0.985276	0.21665	0.519612
28428508	28429008	AT1G75710	Chr1	28428705	28431249	NA	Yes	Yes	7.88777	2.86852	28423018	28423518	AT1G75690	NA	NA	Yes	0.299811	0.394189	Chr1	28422109	28423285	+	739	+	91	interaction54618	5490	9	0.070444	0.214325	1	0.070444	100	-0.455468	690	91	-11.7315	800	-4	-0.360558	0.0219863	-0.0216213	0.93866
4019560	4020060	AT5G12400	Chr5	4013812	4021543	NA	NA	NA	1.7804	3.70055	4008864	4009364	AT5G12380	NA	NA	NA	0.108345	0.154535	Chr5	4009222	4010687	+	78	+	1060	interaction163817	10696	9	0.070444	0.205695	1	0.070444	100	-0.455468	91	908	-11.7315	800	-4	-0.132387	0.565343	-1.88438	NA
83006	83506	AT3G01270	Chr3	82684	84897	NA	NA	Yes	0.262108	0.406151	74425	74925	AT3G01220	Yes	NA	Yes	5.12895	3.46284	Chr3	73480	75538	+	87	+	1143	interaction88609	8581	9	0.070444	0.211969	1	0.070444	100	-0.455503	92	1209	-11.7288	800	-4	-1.55316	NA	0.387748	0.102272
18875026	18875526	AT3G50780	Chr3	18875398	18877534	NA	Yes	Yes	1.24262	1.33236	18873915	18874415	AT3G50770	NA	Yes	Yes	11.5954	17.7632	Chr3	18873957	18874780	+	459	+	764	interaction116358	1111	29	0.070444	0	11	0.070444	1100	-18.5544	332	809	-11.7284	1800	-28	-0.17942	0.411679	0.600747	0.2234
9411901	9412401	AT4G16745	Chr4	9411839	9414897	NA	NA	Yes	7.7134	15.0565	9405990	9406490	AT4G16730	Yes	NA	Yes	5.80814	3.45851	Chr4	9402897	9406003	+	1350	+	98	interaction137465	5911	14	0.070444	1e-06	3	0.070444	300	-2.53798	1129	73	-11.7243	1100	-10	0.883095	0.000261339	-0.414418	NA
11579485	11579985	AT1G32172	Chr1	11578505	11580547	NA	NA	Yes	6.89818	2.96146	11577439	11577939	AT1G32170	Yes	NA	Yes	2.62434	2.8819	Chr1	11575319	11577927	+	1112	+	107	interaction22973	2046	23	0.070444	0	8	0.070444	800	-11.77	1272	79	-11.7224	1500	-20	2.26857	0.258137	0.755629	0.00257014
5961513	5962013	AT5G18000	Chr5	5959899	5961642	NA	NA	Yes	0.31731	0.334351	5955517	5956017	AT5G17980	NA	Yes	Yes	3.75119	4.44969	Chr5	5953595	5956745	+	524	+	114	interaction166616	5996	9	0.070444	0.224517	1	0.070444	100	-0.455603	472	95	-11.7209	800	-4	0.574158	0.834245	-0.599754	0.0156839
17864627	17865127	AT5G44350	Chr5	17864519	17865707	Yes	NA	Yes	1.14971	2.00403	17856604	17857104	AT5G44320	NA	NA	Yes	0.280378	0.378036	Chr5	17854588	17856680	+	1609	+	99	interaction182212	8023	9	0.070444	0.218481	1	0.070444	100	-0.455635	1370	96	-11.7184	800	-4	0.197864	0.76299	0.00951539	0.975339
628940	629440	AT1G02840	Chr1	626740	629819	NA	NA	NA	0.147234	0.265286	624343	624843	AT1G02820	NA	NA	Yes	0.168603	0.226443	Chr1	623764	624475	+	97	+	1043	interaction1566	4597	9	0.070444	0.217464	1	0.070444	100	-0.455667	97	1017	-11.716	800	-4	0.172343	0.300894	-0.0576296	0.844569
28778877	28779377	AT1G76690	Chr1	28778889	28780483	NA	NA	Yes	3.03552	1.24688	28770965	28771465	AT1G76660	NA	NA	NA	0.101603	0.239211	Chr1	28768878	28771409	+	1597	+	124	interaction55252	7912	9	0.070444	0.227615	1	0.070444	100	-0.455667	1536	97	-11.716	800	-4	-0.1776	0.573897	0.0126759	0.974517
169434	169934	AT2G01370	Chr2	168630	169642	NA	NA	Yes	6.17956	4.1509	160060	160560	AT2G01330	NA	NA	NA	0.146374	0.252305	Chr2	158276	160901	+	955	+	79	interaction58615	9374	9	0.070444	0.206454	1	0.070444	100	-0.455667	1118	97	-11.716	800	-4	1.21356	NA	-0.0392176	0.940399
4377083	4377583	AT3G13440	Chr3	4377096	4379575	NA	NA	Yes	0.122184	0.254071	4364012	4364512	AT3G13410	NA	NA	NA	0.158801	0.260703	Chr3	4361856	4364262	+	1850	+	149	interaction96327	13071	9	0.070444	0.23399	1	0.070444	100	-0.455667	1573	97	-11.716	800	-4	0.075488	0.827956	-0.0129782	0.965452
16497088	16497588	AT2G39520	Chr2	16496812	16497621	Yes	NA	Yes	0.689225	0.663989	16495954	16496454	AT2G39518	Yes	NA	Yes	6.27872	0.790153	Chr2	16495874	16496995	+	1365	+	484	interaction81487	1134	47	0.070444	0	23	0.070444	2300	-53.1078	1165	434	-11.7154	2400	-54	-1.55316	NA	0.509834	0.199298
9347533	9348033	AT2G21930	Chr2	9347640	9349128	Yes	NA	Yes	10.3002	3.98754	9344403	9344903	AT2G21920	Yes	NA	Yes	4.89324	2.07039	Chr2	9343409	9347159	+	1220	+	118	interaction66610	3130	14	0.070444	1e-06	3	0.070444	300	-2.53776	1424	74	-11.7141	1100	-10	4.07751	NA	1.21356	NA
23614922	23615422	AT1G63680	Chr1	23614436	23617767	NA	NA	NA	0.654115	0.467454	23607526	23608026	AT1G63670	NA	NA	NA	0.115026	0.209095	Chr1	23607421	23610653	+	1100	+	120	interaction41732	7396	9	0.070444	0.226437	1	0.070444	100	-0.455698	1261	98	-11.7136	800	-4	-0.232815	0.220942	-0.299598	0.191764
25426141	25426641	AT1G67810	Chr1	25426487	25427349	NA	Yes	Yes	0.13422	0.224654	25420459	25420959	AT1G67800	NA	NA	Yes	0.208529	0.207892	Chr1	25420779	25423731	+	460	+	86	interaction47769	5682	9	0.070444	0.211312	1	0.070444	100	-0.455698	312	98	-11.7136	800	-4	0.499162	0.180883	0.0425328	0.918355
3644615	3645115	AT5G11420	Chr5	3644546	3647295	NA	NA	Yes	0.328445	0.474986	3642966	3643466	AT5G11416	NA	NA	Yes	0.607928	0.776023	Chr5	3642779	3643010	+	396	+	107	interaction163039	1649	9	0.070444	0.221937	1	0.070444	100	-0.455698	143	98	-11.7136	800	-4	0.177421	0.420413	-0.335269	NA
8034874	8035374	AT5G23830	Chr5	8033737	8034930	NA	NA	Yes	8.36706	8.67869	8023485	8023985	AT5G23800	NA	NA	Yes	0.26418	0.292609	Chr5	8022215	8024689	+	792	+	115	interaction171139	11389	9	0.070444	0.224857	1	0.070444	100	-0.455698	904	98	-11.7136	800	-4	0.838758	7.64e-07	-0.188247	0.782195
22080108	22080608	AT3G59770	Chr3	22079032	22086149	NA	NA	NA	0.147056	0.251313	22071828	22072328	AT3G59760	NA	NA	NA	0.135526	0.206575	Chr3	22071947	22075416	+	88	+	899	interaction123116	8280	9	0.070444	0.212549	1	0.070444	100	-0.455757	100	1088	-11.7089	800	-4	-0.182696	0.352116	0.0739834	0.812927
11564493	11564993	AT4G21770	Chr4	11563516	11566357	NA	NA	NA	0.249357	0.314176	11562471	11562971	AT4G21760	NA	NA	Yes	0.710797	0.613248	Chr4	11561228	11563950	+	87	+	372	interaction141811	2022	9	0.070444	0.211969	1	0.070444	100	-0.455757	100	289	-11.7089	800	-4	-0.265885	0.269943	-0.729034	0.0973651
17232398	17232898	AT1G46408	Chr1	17232134	17232935	Yes	NA	Yes	2.79902	1.852	17230037	17230537	AT1G46336	Yes	NA	Yes	2.31336	0.52844	Chr1	17230410	17230653	+	1184	+	114	interaction25988	2361	20	0.070444	0	6	0.070444	600	-7.5192	1516	116	-11.7071	1400	-16	1.21356	NA	NA	NA
26276039	26276539	AT1G69800	Chr1	26274229	26276329	NA	NA	Yes	4.81816	4.16858	26272495	26272995	AT1G69795	NA	NA	NA	4.00627	1.53561	Chr1	26272775	26272870	+	937	+	85	interaction49869	3544	9	0.070444	0.210708	1	0.070444	100	-0.455786	732	101	-11.7067	800	-4	0.0196248	0.962074	NA	NA
2191388	2191888	AT5G07050	Chr5	2191384	2193416	NA	NA	Yes	7.14523	7.67719	2189955	2190455	AT5G07040	NA	NA	Yes	4.71988	4.45096	Chr5	2190343	2190823	+	469	+	201	interaction160030	1433	9	0.070444	0.24263	1	0.070444	100	-0.455815	459	102	-11.7045	800	-4	-1.55316	NA	0.251231	0.871998
11264557	11265057	AT1G31470	Chr1	11262917	11264963	NA	NA	NA	0.147915	0.260885	11258623	11259123	AT1G31440	NA	NA	NA	0.145225	0.235177	Chr1	11255835	11258715	+	112	+	452	interaction22084	5934	9	0.070444	0.223784	1	0.070444	100	-0.455897	105	377	-11.6981	800	-4	-0.0332036	0.949166	-0.0689817	0.823221
7522082	7522582	AT2G17300	Chr2	7522400	7523033	NA	NA	Yes	1.66422	1.76264	7517385	7517885	AT2G17290	NA	NA	NA	0.387963	0.331701	Chr2	7516414	7519633	+	149	+	685	interaction63106	4697	9	0.070444	0.23399	1	0.070444	100	-0.455897	105	722	-11.6981	800	-4	-0.0423989	0.922801	0.397423	0.0221735
560027	560527	AT5G02510	Chr5	560134	560860	NA	NA	Yes	0.509213	0.649522	555492	555992	AT5G02500	NA	NA	NA	0.133221	0.272421	Chr5	553744	556442	+	104	+	700	interaction156667	4535	9	0.070444	0.220714	1	0.070444	100	-0.455923	106	495	-11.696	800	-4	0.351147	NA	-0.26041	0.0401305
26409107	26409607	AT1G70120	Chr1	26408920	26409597	NA	NA	Yes	0.0861583	0.154128	26407141	26407641	AT1G70110	NA	NA	Yes	0.37023	0.468664	Chr1	26406237	26408323	+	651	+	1234	interaction50176	1966	40	0.070444	0	18	0.070444	1800	-37.5672	611	1396	-11.6952	2200	-44	NA	NA	0.160283	NA
9108889	9109389	AT5G26090	Chr5	9109025	9113235	Yes	NA	Yes	0.12759	0.186468	9107963	9108463	AT5G26080	Yes	NA	Yes	8.21982	1.35772	Chr5	9107996	9108422	+	119	+	443	interaction173147	926	9	0.070444	0.226134	1	0.070444	100	-0.455949	107	527	-11.694	800	-4	0.204391	NA	0.154693	0.912398
16632966	16633466	AT5G41590	Chr5	16632085	16633896	NA	Yes	Yes	0.116314	0.240875	16626504	16627004	AT5G41580	NA	Yes	Yes	0.533537	0.590334	Chr5	16626336	16630783	+	1036	+	89	interaction180380	6462	9	0.070444	0.213145	1	0.070444	100	-0.455949	962	107	-11.694	800	-4	0.428638	0.62835	-0.105593	0.781028
15804484	15804984	AT2G37680	Chr2	15803242	15805573	NA	NA	NA	0.156681	0.258278	15802508	15803008	AT2G37678	NA	NA	NA	0.145472	0.204612	Chr2	15801464	15802793	+	107	+	863	interaction80383	1976	9	0.070444	0.221937	1	0.070444	100	-0.455974	108	573	-11.6921	800	-4	-0.00268845	0.996494	0.545755	0.0372821
7434460	7434960	AT1G21240	Chr1	7434302	7436830	NA	NA	Yes	0.337866	0.448747	7424472	7424972	AT1G21210	NA	NA	Yes	0.280492	0.405791	Chr1	7424105	7427041	+	529	+	84	interaction14058	9988	9	0.070444	0.210028	1	0.070444	100	-0.455999	748	109	-11.6902	800	-4	-1.45757	0.263258	-0.481314	0.73263
13921409	13921909	AT2G32810	Chr2	13919126	13925351	Yes	NA	Yes	0.262403	0.259392	13916595	13917095	AT2G32800	NA	NA	NA	0.188174	0.27737	Chr2	13916451	13919179	+	73	+	1262	interaction76364	4814	9	0.070444	0.201338	1	0.070444	100	-0.455999	109	1074	-11.6902	800	-4	-0.207741	0.2271	0.482209	0.0521895
20891487	20891987	AT5G51440	Chr5	20891162	20892211	NA	NA	NA	2.48794	4.89169	20890094	20890594	AT5G51430	NA	NA	Yes	0.157711	0.272642	Chr5	20886837	20890907	+	354	+	1159	interaction187357	1393	24	0.070444	0	8	0.070444	800	-11.547	367	1036	-11.6888	1600	-22	-0.138253	0.725628	-0.20596	0.204316
12507626	12508126	AT2G29110	Chr2	12506879	12510552	Yes	NA	Yes	0.36724	0.689866	12503531	12504031	AT2G29100	Yes	NA	Yes	2.56375	1.61203	Chr2	12501091	12504912	+	93	+	547	interaction72328	4095	9	0.070444	0.215385	1	0.070444	100	-0.456023	110	720	-11.6883	800	-4	0.658682	0.779922	0.758	NA
16686473	16686973	AT4G35060	Chr4	16685719	16686703	NA	Yes	Yes	0.326006	0.488175	16684023	16684523	AT4G35050	NA	NA	NA	0.124615	0.240294	Chr4	16682579	16684848	+	451	+	93	interaction151737	2450	9	0.070444	0.215385	1	0.070444	100	-0.456023	305	110	-11.6883	800	-4	0.510967	0.000735316	0.0182049	0.967595
7377056	7377556	AT2G16980	Chr2	7376348	7381103	Yes	NA	Yes	14.1176	18.5671	7374487	7374987	AT2G16970	Yes	NA	Yes	4.22787	1.40009	Chr2	7369548	7375528	+	1059	+	84	interaction62777	2569	14	0.070444	1e-06	3	0.070444	300	-2.53714	1137	77	-11.6853	1100	-10	0.236933	0.488816	0.685653	0.0493262
9847154	9847654	AT1G28190	Chr1	9846883	9847923	NA	NA	Yes	0.995206	1.10322	9841080	9841580	AT1G28170	NA	NA	Yes	5.32441	5.9335	Chr1	9841331	9842312	+	100	+	1104	interaction18931	6074	18	0.070444	0	5	0.070444	500	-5.68349	88	1217	-11.6847	1300	-14	0.404225	0.26224	-0.61052	0.786165
8795979	8796479	AT5G25350	Chr5	8794251	8797020	NA	Yes	Yes	2.24393	1.93681	8791586	8792086	AT5G25330	NA	NA	Yes	10.035	15.6098	Chr5	8791512	8792813	+	120	+	1142	interaction172686	4393	18	0.070444	0	5	0.070444	500	-5.68349	88	1322	-11.6847	1300	-14	0.167695	0.305601	NA	NA
13827980	13828480	AT2G32580	Chr2	13827435	13829317	NA	NA	NA	0.907071	0.796088	13814988	13815488	AT2G32540	Yes	NA	Yes	4.34853	1.69034	Chr2	13814685	13818289	+	148	+	1087	interaction75979	12992	9	0.070444	0.233776	1	0.070444	100	-0.456071	112	1127	-11.6846	800	-4	0.120804	0.59824	0.211692	0.326
18918454	18918954	AT3G50900	Chr3	18918018	18918618	NA	NA	Yes	0.164051	0.251322	18916648	18917148	AT3G50890	NA	NA	Yes	3.87365	5.63176	Chr3	18916165	18917328	+	157	+	1724	interaction116499	1806	41	0.070444	0	20	0.070444	2000	-44.6402	134	1786	-11.6808	2100	-46	0.0942872	0.884987	-0.342822	0.26948
7675478	7675978	AT4G13230	Chr4	7675652	7676680	Yes	NA	Yes	0.196743	0.272079	7674441	7674941	AT4G13220	Yes	NA	Yes	0.407465	0.46384	Chr4	7674287	7675313	+	826	+	1678	interaction133798	1037	50	0.07168	0	25	0.070444	2500	-59.441	589	1714	-11.6803	2413.75	-58	-0.10148	0.970898	0.0207006	0.956373
9158531	9159031	AT2G21400	Chr2	9158389	9159701	NA	NA	Yes	7.91009	5.09162	9156543	9157043	AT2G21390	NA	NA	NA	0.161743	0.260617	Chr2	9152005	9156878	+	1311	+	88	interaction66072	1988	27	0.070444	0	11	0.070444	1100	-19.1755	1365	64	-11.6779	1600	-26	-0.776341	0.712697	-0.27109	0.0486106
845909	846409	AT3G03540	Chr3	846349	848297	NA	NA	Yes	0.109739	0.179235	844953	845453	AT3G03530	NA	NA	Yes	2.56689	2.41855	Chr3	842498	845043	+	203	+	176	interaction90345	956	9	0.070444	0.239064	1	0.070444	100	-0.456161	161	116	-11.6776	800	-4	NA	NA	-0.23659	0.562875
4377044	4377544	AT3G13440	Chr3	4377096	4379575	NA	NA	Yes	0.201465	0.315962	4366522	4367022	AT3G13420	NA	NA	NA	0.144585	0.24406	Chr3	4364526	4366791	+	1850	+	114	interaction96330	10522	9	0.070444	0.224517	1	0.070444	100	-0.456161	1573	116	-11.6776	800	-4	0.075488	0.827956	0.0277803	0.975063
10933884	10934384	AT4G20240	Chr4	10931492	10934212	Yes	NA	Yes	0.327664	0.316547	10921430	10921930	AT4G20220	Yes	NA	Yes	2.12595	0.512838	Chr4	10918675	10922396	+	856	+	103	interaction140800	12454	9	0.070444	0.220282	1	0.070444	100	-0.456182	853	117	-11.676	800	-4	0.025956	0.961295	NA	NA
25472002	25472502	AT1G67910	Chr1	25471287	25472440	NA	NA	Yes	3.4535	0.68222	25465050	25465550	AT1G67900	NA	NA	NA	0.146329	0.203092	Chr1	25464725	25470017	+	128	+	742	interaction47991	6952	9	0.070444	0.228804	1	0.070444	100	-0.456203	118	584	-11.6743	800	-4	0.628044	0.053804	0.119786	0.691311
8281028	8281528	AT3G23200	Chr3	8281362	8282778	NA	NA	Yes	0.255331	0.33442	8277860	8278360	AT3G23180	NA	NA	Yes	1.28711	0.519393	Chr3	8277036	8278396	+	161	+	948	interaction103636	3168	9	0.070444	0.236455	1	0.070444	100	-0.456203	118	1001	-11.6743	800	-4	-0.145963	0.765191	0.326395	0.226421
4356996	4357496	AT3G13400	Chr3	4355137	4357428	NA	NA	Yes	0.0601291	0.105824	4353126	4353626	AT3G13390	NA	NA	Yes	4.62564	6.46986	Chr3	4351044	4353393	+	62	+	605	interaction96222	3870	16	0.070444	0	4	0.070444	400	-4.00865	74	613	-11.6737	1200	-12	-1.93804	NA	NA	NA
15838017	15838517	AT2G37780	Chr2	15837441	15838302	NA	Yes	Yes	0.159069	0.240218	15831959	15832459	AT2G37760	NA	NA	Yes	0.674171	0.600175	Chr2	15831853	15833920	+	1792	+	496	interaction80460	6058	29	0.070444	0	11	0.070444	1100	-18.5377	1740	377	-11.6728	1800	-28	1.21356	NA	0.179234	0.350893
23912471	23912971	AT5G59270	Chr5	23911150	23913235	NA	NA	NA	0.137444	0.256056	23909903	23910403	AT5G59260	NA	NA	NA	0.164051	0.251322	Chr5	23907900	23909925	+	115	+	805	interaction194067	2568	9	0.070444	0.224857	1	0.070444	100	-0.456224	119	786	-11.6727	800	-4	0.447846	0.863359	0.660255	0.491772
26123618	26124118	AT5G65380	Chr5	26122988	26126439	NA	NA	Yes	0.174093	0.245333	26122337	26122837	AT5G65370	NA	NA	Yes	1.12646	0.70855	Chr5	26121707	26122749	+	172	+	224	interaction197464	1281	9	0.070444	0.238401	1	0.070444	100	-0.456342	125	137	-11.6636	800	-4	0.258673	0.164719	NA	NA
26917838	26918338	AT1G71420	Chr1	26917821	26920099	NA	NA	NA	1.78035	0.487827	26915578	26916078	AT1G71410	NA	NA	NA	0.192004	0.272489	Chr1	26912725	26917712	+	902	+	194	interaction51512	2260	9	0.070444	0.241694	1	0.070444	100	-0.456361	1004	126	-11.6622	800	-4	-0.217766	0.858202	-0.109267	0.67208
29502931	29503431	AT1G78410	Chr1	29502581	29503241	NA	NA	NA	2.66817	1.00373	29499467	29499967	AT1G78400	NA	NA	Yes	3.40447	2.91652	Chr1	29498280	29499682	+	139	+	985	interaction56640	3464	9	0.070444	0.231691	1	0.070444	100	-0.456361	126	1026	-11.6622	800	-4	1.22656	0.30398	-1.55316	NA
18662509	18663009	AT5G46020	Chr5	18662845	18664874	Yes	NA	Yes	0.167343	0.274806	18660653	18661153	AT5G46010	Yes	NA	Yes	8.84322	5.77903	Chr5	18660583	18661183	+	131	+	395	interaction184055	1856	9	0.070444	0.229613	1	0.070444	100	-0.456361	126	361	-11.6622	800	-4	0.263937	0.0503978	-1.60131	NA
7564102	7564602	AT2G17420	Chr2	7564344	7566539	NA	NA	NA	0.218929	0.450265	7560473	7560973	AT2G17410	NA	NA	NA	0.146295	0.22316	Chr2	7558976	7563752	+	673	+	127	interaction63123	3629	9	0.070444	0.228499	1	0.070444	100	-0.456379	504	127	-11.6608	800	-4	0.106258	0.577119	-0.0670963	0.816772
12699502	12700002	AT2G29710	Chr2	12698672	12700343	NA	NA	NA	2.15185	0.964979	12697893	12698393	AT2G29700	NA	NA	NA	0.219544	0.329948	Chr2	12697419	12698167	+	798	+	288	interaction73057	1609	35	0.070444	0	15	0.070444	1500	-29.1743	1040	275	-11.6592	2000	-36	0.8709	0.0287012	0.325216	0.126459
26773514	26774014	AT1G71002	Chr1	26773538	26773725	NA	NA	NA	0.317697	0.482884	26760554	26761054	AT1G70970	NA	NA	Yes	11.8642	11.2921	Chr1	26759833	26761042	+	1542	+	94	interaction51131	12960	9	0.070444	0.215892	1	0.070444	100	-0.456415	1435	129	-11.6581	800	-4	NA	NA	NA	NA
2489044	2489544	AT4G04910	Chr4	2489416	2495766	NA	NA	Yes	11.6529	5.62247	2481013	2481513	AT4G04890	Yes	NA	Yes	4.47113	4.40986	Chr4	2476488	2482345	+	494	+	119	interaction128784	8031	9	0.070444	0.226134	1	0.070444	100	-0.456432	427	130	-11.6567	800	-4	-0.193276	0.33923	-0.372225	0.00358148
9646497	9646997	AT4G17180	Chr4	9646504	9648295	NA	NA	NA	0.516532	0.385489	9636458	9636958	AT4G17140	NA	NA	NA	0.118902	0.224356	Chr4	9613329	9636873	+	170	+	861	interaction138080	10039	9	0.070444	0.238052	1	0.070444	100	-0.456449	131	773	-11.6554	800	-4	0.0456696	0.926018	-0.395278	0.0470292
13819115	13819615	AT2G32550	Chr2	13819378	13822839	Yes	NA	Yes	6.20015	3.54705	13814616	13815116	AT2G32540	Yes	NA	Yes	4.34853	1.69034	Chr2	13814685	13818289	+	157	+	1008	interaction75934	4499	9	0.070444	0.235709	1	0.070444	100	-0.456483	133	931	-11.6528	800	-4	0.626507	0.022375	0.211692	0.326
24828466	24828966	AT1G66550	Chr1	24828501	24829639	NA	NA	Yes	0.763888	1.42765	24821008	24821508	AT1G66530	NA	NA	NA	0.205922	0.230745	Chr1	24818910	24822342	+	1563	+	101	interaction46318	7458	9	0.070444	0.219393	1	0.070444	100	-0.456499	1828	134	-11.6516	800	-4	2.3611	NA	-0.237999	0.221892
18416520	18417020	AT4G39680	Chr4	18414305	18417530	NA	NA	NA	12.4509	21.1697	18400493	18400993	AT4G39640	NA	NA	Yes	1.37419	1.20766	Chr4	18399954	18402963	+	93	+	1318	interaction155185	16027	9	0.070444	0.215385	1	0.070444	100	-0.456499	134	1540	-11.6516	800	-4	-0.0256527	0.929349	0.158097	0.652323
2828964	2829464	AT3G09220	Chr3	2827238	2830542	NA	NA	Yes	6.00912	1.81612	2826211	2826711	AT3G09210	NA	NA	Yes	0.290603	0.386189	Chr3	2825278	2826880	+	126	+	537	interaction93225	2753	9	0.070444	0.228225	1	0.070444	100	-0.456547	137	383	-11.6479	800	-4	0.501752	0.515712	-0.185181	0.252713
27127420	27127920	AT1G72100	Chr1	27127211	27128978	NA	Yes	Yes	0.809889	0.769628	27123609	27124109	AT1G72090	NA	Yes	Yes	0.447698	0.859524	Chr1	27123566	27126895	+	332	+	941	interaction51841	3811	45	0.070444	0	22	0.070444	2200	-50.2237	272	875	-11.6458	2300	-52	1.22243	0.000214386	-0.145212	0.595513
22656518	22657018	AT5G55940	Chr5	22655997	22658048	NA	Yes	Yes	0.168388	0.336921	22653373	22653873	AT5G55930	NA	NA	Yes	0.545893	0.623868	Chr5	22652714	22656106	+	184	+	1010	interaction191465	3145	20	0.070444	0	6	0.070444	600	-7.51118	127	931	-11.6356	1400	-16	-0.00367707	0.992393	0.985472	2.62e-06
904151	904651	AT5G03570	Chr5	903755	906664	Yes	NA	Yes	1.15355	1.41549	902570	903070	AT5G03560	NA	NA	NA	0.17796	0.276504	Chr5	900459	902762	+	1000	+	123	interaction157007	1581	14	0.070444	1e-06	3	0.070444	300	-2.53602	930	83	-11.6344	1100	-10	0.122707	0.839716	0.204	0.330738
7942504	7943004	AT2G18260	Chr2	7942152	7943388	NA	NA	Yes	0.142939	0.230426	7939964	7940464	AT2G18250	NA	NA	Yes	0.172918	0.284236	Chr2	7939906	7941678	+	292	+	1856	interaction64056	2540	72	0.070444	0	43	0.070444	4300	-125.959	265	1534	-11.6279	2900	-98	0.0234965	0.979738	0.154007	0.603493
19278461	19278961	AT1G51890	Chr1	19274657	19278528	Yes	NA	Yes	0.195023	0.270266	19261438	19261938	AT1G51860	Yes	NA	Yes	2.57161	1.26318	Chr1	19257633	19261479	+	792	+	193	interaction30678	17023	9	0.070444	0.241557	1	0.070444	100	-0.456819	900	157	-11.6272	800	-4	0.126732	0.782195	0.180556	0.498012
18770012	18770512	AT5G46280	Chr5	18769696	18773658	NA	NA	NA	0.925179	0.781644	18768959	18769459	AT5G46270	Yes	NA	Yes	1.40529	0.567285	Chr5	18764348	18769090	+	153	+	428	interaction184349	1053	9	0.070444	0.234867	1	0.070444	100	-0.456819	157	291	-11.6272	800	-4	-0.588259	0.00122221	-0.027058	0.951798
7497053	7497553	AT1G21410	Chr1	7497140	7499579	NA	NA	NA	0.149282	0.210256	7494001	7494501	AT1G21400	NA	NA	NA	0.163733	0.258329	Chr1	7493425	7496710	+	125	+	1993	interaction14402	3052	28	0.070444	0	11	0.070444	1100	-18.837	112	1647	-11.6256	1700	-28	0.3153	0.0969194	0.59145	0.0128884
8885001	8885501	AT1G25340	Chr1	8885080	8886398	NA	NA	Yes	6.05982	4.5828	8877605	8878105	AT1G25320	Yes	NA	Yes	0.772546	0.41637	Chr1	8877856	8880310	+	74	+	1383	interaction17285	7396	16	0.070444	0	4	0.070444	400	-4.00631	78	1007	-11.6254	1200	-12	0.920804	NA	-0.000324095	0.999907
8776093	8776593	AT3G24230	Chr3	8774615	8777407	NA	NA	Yes	1.43093	1.81588	8768589	8769089	AT3G24225	Yes	NA	Yes	6.80105	4.34373	Chr3	8768845	8769172	+	1100	+	245	interaction104607	7504	9	0.070444	0.247486	1	0.070444	100	-0.456842	1352	159	-11.6254	800	-4	-0.887458	0.194835	-0.625957	0.793678
20008066	20008566	AT5G49340	Chr5	20007347	20009038	NA	NA	Yes	0.404389	0.632096	20003903	20004403	AT5G49334	Yes	NA	Yes	8.3264	3.09014	Chr5	20003967	20004102	+	354	+	136	interaction186430	4163	9	0.070444	0.23094	1	0.070444	100	-0.456842	235	159	-11.6254	800	-4	-0.0215692	0.986368	NA	NA
1226071	1226571	AT3G04550	Chr3	1225921	1227436	NA	NA	Yes	0.109498	0.211706	1222496	1222996	AT3G04530	NA	NA	Yes	6.36302	9.49995	Chr3	1221545	1222655	+	1834	+	687	interaction90868	3575	24	0.070444	0	8	0.070444	800	-11.5346	1854	465	-11.6226	1600	-22	-0.22646	0.184292	0.465041	0.30637
20036436	20036936	AT1G53670	Chr1	20036640	20038219	NA	NA	Yes	2.00572	1.26959	20028366	20028866	AT1G53645	NA	NA	Yes	0.430992	0.412235	Chr1	20026146	20028635	+	219	+	1957	interaction32634	8070	9	0.070444	0.244779	1	0.070444	100	-0.456898	164	1870	-11.6211	800	-4	0.198231	0.250748	-0.190251	0.398188
14147992	14148492	AT2G33385	Chr2	14147502	14149799	Yes	NA	Yes	0.78016	0.352451	14145462	14145962	AT2G33380	NA	NA	Yes	0.979018	0.839921	Chr2	14144830	14146471	+	261	+	969	interaction76867	2530	9	0.070444	0.248946	1	0.070444	100	-0.456898	164	870	-11.6211	800	-4	-0.396912	0.542114	0.176823	0.531292
6923978	6924478	AT3G19900	Chr3	6922566	6925066	NA	NA	NA	7.40064	4.35659	6920984	6921484	AT3G19895	Yes	NA	Yes	0.543356	0.384763	Chr3	6917293	6921556	+	112	+	1141	interaction100138	2994	14	0.070444	1e-06	3	0.070444	300	-2.53568	85	1093	-11.6191	1100	-10	0.177623	0.356348	-0.107602	0.70267
5965510	5966010	AT5G18015	Chr5	5965970	5966042	NA	NA	Yes	5.38507	1.69817	5963327	5963827	AT5G18010	NA	NA	Yes	0.370268	0.598197	Chr5	5962896	5963405	+	220	+	336	interaction166655	2183	9	0.070444	0.244889	1	0.070444	100	-0.45693	167	199	-11.6187	800	-4	-1.60131	NA	-0.145472	0.850472
16163110	16163610	AT5G40390	Chr5	16161514	16165357	NA	NA	NA	0.160707	0.247745	16152505	16153005	AT5G40380	Yes	NA	Yes	5.08546	4.16686	Chr5	16151771	16155177	+	1205	+	157	interaction179575	10605	9	0.070444	0.235709	1	0.070444	100	-0.45693	1125	167	-11.6187	800	-4	-0.29426	0.120297	0.0909706	0.727591
20746493	20746993	AT5G51020	Chr5	20745348	20747277	NA	Yes	NA	0.336248	0.311587	20742937	20743437	AT5G51000	Yes	NA	Yes	4.67852	0.86116	Chr5	20742532	20743669	+	232	+	458	interaction187263	3556	9	0.070444	0.246182	1	0.070444	100	-0.45693	167	470	-11.6187	800	-4	0.037548	0.889747	3.82464	NA
8149462	8149962	AT5G24100	Chr5	8148615	8151308	NA	NA	Yes	0.641725	0.533156	8135984	8136484	AT5G24070	NA	NA	Yes	11.3888	17.0148	Chr5	8134300	8135991	+	1038	+	145	interaction171549	13478	9	0.070444	0.233074	1	0.070444	100	-0.45694	1166	168	-11.6179	800	-4	-0.0123955	0.98822	0.645079	0.39838
8037539	8038039	AT3G22750	Chr3	8037215	8039903	NA	NA	Yes	0.295125	0.337991	8025476	8025976	AT3G22700	Yes	NA	Yes	3.34073	4.32118	Chr3	8024797	8025814	+	180	+	1512	interaction103156	12063	9	0.070444	0.239707	1	0.070444	100	-0.456971	171	1513	-11.6156	800	-4	0.351735	0.0537642	0.821518	NA
12633457	12633957	AT4G24440	Chr4	12633179	12634760	NA	Yes	Yes	0.165855	0.279924	12627014	12627514	AT4G24420	NA	Yes	Yes	8.82692	14.5846	Chr4	12627095	12627606	+	108	+	1751	interaction145537	6443	18	0.070444	0	5	0.070444	500	-5.67797	95	1876	-11.615	1300	-14	0.188871	0.548428	0.559191	0.823365
19426394	19426894	AT3G52400	Chr3	19425633	19427141	NA	Yes	NA	7.06679	2.02345	19424551	19425051	AT3G52390	NA	Yes	NA	0.122178	0.233538	Chr3	19422987	19425214	+	995	+	90	interaction117592	1843	26	0.070444	0	10	0.070444	1000	-16.4816	916	81	-11.6124	1600	-24	0.582178	0.00236053	-0.203916	0.644135
26849446	26849946	AT5G67290	Chr5	26848147	26849846	NA	NA	NA	9.05843	6.23797	26842498	26842998	AT5G67280	NA	NA	Yes	0.284262	0.470045	Chr5	26842269	26845190	+	1576	+	153	interaction198559	6948	28	0.070444	0	11	0.070444	1100	-18.8332	1302	113	-11.6122	1700	-28	-0.0535762	0.883809	-0.786767	2.26e-05
21768410	21768910	AT3G58880	Chr3	21768484	21770167	Yes	NA	Yes	0.116724	0.2082	21758483	21758983	AT3G58840	NA	NA	NA	0.21931	0.255511	Chr3	21757311	21758772	+	904	+	220	interaction122195	9927	9	0.070444	0.244889	1	0.070444	100	-0.457047	1160	179	-11.6098	800	-4	NA	NA	0.0183137	0.966451
387156	387656	AT5G02020	Chr5	386017	388123	NA	NA	NA	0.219666	0.341314	385087	385587	AT5G02010	NA	NA	NA	0.143154	0.26154	Chr5	383152	385850	+	394	+	189	interaction156226	2069	9	0.070444	0.241009	1	0.070444	100	-0.457056	399	180	-11.6091	800	-4	0.658634	0.370995	0.137396	0.687456
1019067	1019567	AT5G03830	Chr5	1018337	1020460	NA	Yes	Yes	0.480378	0.486129	1013131	1013631	AT5G03800	NA	Yes	Yes	0.385166	0.553505	Chr5	1010779	1013586	+	1926	+	34	interaction157302	5936	8	0.070444	1	1	0.070444	100	-0.428752	1869	10	-11.6049	700	-4	0.0106422	0.984654	-0.208404	0.5824
21775046	21775546	AT3G58910	Chr3	21775305	21776079	NA	NA	NA	0.126302	0.204567	21769043	21769543	AT3G58880	Yes	NA	Yes	9.55835	6.01835	Chr3	21768484	21770167	+	165	+	300	interaction122357	6003	9	0.070444	0.237191	1	0.070444	100	-0.457133	189	345	-11.6033	800	-4	0.163957	NA	NA	NA
22489313	22489813	AT1G61060	Chr1	22488547	22489711	NA	NA	Yes	0.261934	0.312247	22487968	22488468	AT1G61050	NA	NA	Yes	0.382604	0.39028	Chr1	22486735	22488284	+	637	+	484	interaction38803	1345	29	0.070444	0	11	0.070444	1100	-18.5134	470	495	-11.5929	1800	-28	1.61886	NA	0.178277	0.725899
22261889	22262389	AT1G60420	Chr1	22261887	22264408	NA	NA	Yes	0.285398	0.307871	22259542	22260042	AT1G60410	Yes	NA	Yes	9.40932	6.61715	Chr1	22258981	22260715	+	115	+	828	interaction38326	2347	16	0.070444	0	4	0.070444	400	-4.0047	81	1105	-11.5926	1200	-12	-0.0577766	0.832555	1.96386	NA
3531985	3532485	AT5G11100	Chr5	3532401	3535221	NA	NA	Yes	1.01412	1.22417	3519964	3520464	AT5G11080	NA	NA	Yes	0.278633	0.406919	Chr5	3517222	3520003	+	251	+	377	interaction162734	12021	9	0.070444	0.248058	1	0.070444	100	-0.457274	208	317	-11.5926	800	-4	-0.0301046	0.961669	0.0999511	NA
15615540	15616040	AT5G39010	Chr5	15615947	15616457	Yes	NA	Yes	0.126274	0.20555	15611945	15612445	AT5G39000	Yes	NA	Yes	6.52672	4.26991	Chr5	15611859	15614481	+	213	+	1925	interaction177543	3595	20	0.070444	0	6	0.070444	600	-7.50559	136	1969	-11.5864	1400	-16	NA	NA	0.17695	0.901167
7190774	7191274	AT2G16586	Chr2	7190936	7191938	NA	NA	Yes	0.170225	0.242235	3252959	3253459	AT5G10340	NA	NA	Yes	2.66487	2.77224	Chr5	3253121	3255045	+	443	+	1819	interaction62346	interchromosomal	9	0.070444	0.258	1	0.070444	100	-0.457369	223	614	-11.5855	800	-4	-3.13837	NA	-0.58545	NA
3252959	3253459	AT5G10340	Chr5	3253121	3255045	NA	NA	Yes	2.59634	0.649598	7190774	7191274	AT2G16586	NA	NA	Yes	0.807895	0.373693	Chr2	7190936	7191938	+	1819	+	443	interaction162233	interchromosomal	9	0.070444	0.258	1	0.070444	100	-0.457369	614	223	-11.5855	800	-4	-0.58545	NA	-3.13837	NA
9412969	9413469	AT3G25790	Chr3	9413126	9415003	Yes	NA	Yes	0.187299	0.27389	9404413	9404913	AT3G25760	Yes	NA	Yes	3.16682	1.55882	Chr3	9403882	9405250	+	305	+	556	interaction106221	8556	9	0.070444	0.252068	1	0.070444	100	-0.457446	237	365	-11.5797	800	-4	-0.253417	0.626438	1.53125	6.62e-29
7333472	7333972	AT4G12380	Chr4	7333510	7334469	NA	NA	Yes	0.251259	0.276245	7327974	7328474	AT4G12360	Yes	NA	Yes	5.06588	1.55323	Chr4	7327991	7329192	+	1026	+	124	interaction132974	5498	14	0.070444	1e-06	3	0.070444	300	-2.53476	834	91	-11.5777	1100	-10	3.52904	NA	-0.0577408	NA
23618909	23619409	AT1G63690	Chr1	23618377	23622396	NA	NA	NA	0.654115	0.467454	23617062	23617562	AT1G63680	NA	NA	NA	0.149853	0.23778	Chr1	23614436	23617767	+	308	+	450	interaction41792	1847	9	0.070444	0.252251	1	0.070444	100	-0.4576	271	411	-11.5681	800	-4	-0.0441411	0.870312	-0.232815	0.220942
17406011	17406511	AT2G41720	Chr2	17403602	17407135	NA	NA	NA	10.8409	12.204	17396994	17397494	AT2G41705	NA	NA	NA	0.134691	0.228252	Chr2	17397273	17400081	+	272	+	648	interaction83791	9017	9	0.070444	0.249814	1	0.070444	100	-0.457604	272	565	-11.5678	800	-4	-0.159081	0.418528	0.129572	0.715909
7908082	7908582	AT1G22403	Chr1	7908567	7909708	NA	NA	NA	0.274229	0.330498	7899038	7899538	AT1G22370	NA	NA	Yes	1.86236	1.36759	Chr1	7898012	7899879	+	372	+	1032	interaction15236	9044	9	0.070444	0.255468	1	0.070444	100	-0.45762	276	912	-11.5666	800	-4	0.239837	0.555465	0.201889	0.623456
24361486	24361986	AT1G65520	Chr1	24361031	24361993	Yes	NA	Yes	0.758886	1.19713	24359471	24359971	AT1G65510	Yes	NA	Yes	2.64143	0.726205	Chr1	24359452	24360081	+	460	+	1225	interaction43936	2015	55	0.070444	0	29	0.070444	2900	-73.1379	424	1077	-11.563	2600	-66	0.369449	0.0713288	0.872973	0.000306457
13321659	13322159	AT2G31260	Chr2	13322020	13327400	NA	NA	Yes	0.691397	0.690544	13320906	13321406	AT2G31250	NA	NA	Yes	0.211029	0.322602	Chr2	13319620	13321526	+	1187	+	234	interaction74605	753	9	0.070444	0.246388	1	0.070444	100	-0.457671	1210	290	-11.5628	800	-4	-0.0954867	0.714515	-0.788612	0.566174
167656	168156	AT2G01360	Chr2	167996	168479	NA	NA	NA	6.65149	3.90274	166893	167393	AT2G01350	NA	Yes	NA	0.237388	0.37797	Chr2	165140	167259	+	957	+	147	interaction58562	763	20	0.070444	0	6	0.070444	600	-7.50227	1058	142	-11.5574	1400	-16	NA	NA	-0.0549257	0.854136
898487	898987	AT1G03600	Chr1	898875	899655	NA	NA	Yes	0.377775	0.697839	891933	892433	AT1G03560	NA	NA	NA	0.141201	0.238948	Chr1	890155	892410	+	1958	+	338	interaction1900	6554	9	0.070444	0.253853	1	0.070444	100	-0.457748	1450	314	-11.557	800	-4	-0.0875007	0.679082	0.0621419	0.878191
15595005	15595505	AT5G38970	Chr5	15594673	15597885	Yes	NA	Yes	3.74331	5.3643	15593489	15593989	AT5G38960	Yes	NA	Yes	3.57376	0.698349	Chr5	15592991	15593783	+	291	+	1843	interaction177302	1516	42	0.070444	0	20	0.070444	2000	-43.9903	251	1798	-11.5524	2200	-46	-0.217992	0.750931	NA	NA
8097002	8097502	AT2G18690	Chr2	8097419	8098827	Yes	NA	Yes	1.54402	1.96063	8094021	8094521	AT2G18670	NA	NA	Yes	0.880949	0.388327	Chr2	8093219	8095729	+	476	+	429	interaction64658	2981	9	0.070444	0.257603	1	0.070444	100	-0.457831	514	345	-11.5508	800	-4	0.417622	0.228022	0.933624	0.000956687
7922119	7922619	AT1G22440	Chr1	7922427	7924944	NA	NA	Yes	2.47876	2.66231	7921351	7921851	AT1G22430	NA	NA	Yes	0.625856	0.640061	Chr1	7919143	7921832	+	408	+	397	interaction15347	768	9	0.070444	0.256466	1	0.070444	100	-0.45789	438	371	-11.5464	800	-4	0.2852	0.100608	0.0661309	0.799532
15529501	15530001	AT2G36970	Chr2	15529005	15530749	NA	Yes	Yes	4.41903	6.4362	15526900	15527400	AT2G36960	NA	NA	NA	0.151212	0.24322	Chr2	15522919	15527758	+	1602	+	86	interaction80077	2601	27	0.070444	0	11	0.070444	1100	-19.1391	1512	67	-11.5442	1600	-26	-0.465634	0.137601	-0.0186713	0.969416
25909051	25909551	AT5G64810	Chr5	25908412	25909803	NA	NA	Yes	0.177167	0.233888	25895963	25896463	AT5G64760	NA	Yes	Yes	0.137041	0.222967	Chr5	25893779	25896582	+	1594	+	120	interaction196996	13088	14	0.070444	1e-06	3	0.070444	300	-2.53396	1600	97	-11.5418	1100	-10	-0.325496	0.827346	-0.137055	0.661471
8498989	8499489	AT1G24010	Chr1	8498802	8499499	Yes	NA	Yes	7.82847	3.32237	8496435	8496935	AT1G24000	Yes	NA	Yes	5.81594	1.71694	Chr1	8496056	8496566	+	907	+	1262	interaction16596	2554	57	0.070444	0	30	0.070444	3000	-76.0719	921	1296	-11.5402	2700	-70	2.68836	NA	2.58836	NA
29491928	29492428	AT1G78390	Chr1	29490894	29492875	NA	NA	Yes	0.192145	0.301372	29486010	29486510	AT1G78380	NA	NA	Yes	0.283504	0.422019	Chr1	29486412	29487906	+	1148	+	510	interaction56524	5918	9	0.070444	0.259701	1	0.070444	100	-0.457975	1209	416	-11.5401	800	-4	0.952253	0.598131	0.0929859	0.74464
19022535	19023035	AT5G46874	Chr5	19022382	19022699	Yes	NA	Yes	4.15326	4.77299	19015083	19015583	AT5G46870	NA	NA	NA	0.363598	0.264853	Chr5	19015232	19017063	+	658	+	452	interaction185100	7452	9	0.070444	0.258263	1	0.070444	100	-0.458	576	431	-11.5382	800	-4	2.82472	NA	0.00590339	0.993538
7003045	7003545	AT1G20200	Chr1	7001200	7004418	NA	NA	NA	0.164742	0.244122	6998526	6999026	AT1G20190	NA	NA	Yes	0.33719	0.534353	Chr1	6998488	6999817	+	380	+	661	interaction13266	4519	9	0.070444	0.255809	1	0.070444	100	-0.458004	434	681	-11.5379	800	-4	-0.17989	0.308715	-0.495324	0.00487612
1237512	1238012	AT3G04580	Chr3	1235282	1238493	NA	NA	NA	5.39027	5.34842	1222569	1223069	AT3G04530	NA	NA	Yes	6.36302	9.49995	Chr3	1221545	1222655	+	1125	+	687	interaction90956	14943	9	0.070444	0.262332	1	0.070444	100	-0.458049	1233	465	-11.5346	800	-4	-0.0814888	0.788455	0.465041	0.30637
4954524	4955024	AT5G15260	Chr5	4953439	4954932	NA	NA	Yes	3.69471	2.43055	4952022	4952522	AT5G15250	NA	Yes	Yes	2.58135	3.85977	Chr5	4950358	4952803	+	178	+	1749	interaction165154	2502	56	0.070444	0	32	0.070444	3200	-86.4924	129	1636	-11.5295	2400	-70	0.258313	0.269756	1.1057	0.656154
9640411	9640911	AT3G26300	Chr3	9639198	9640866	NA	NA	Yes	6.18413	2.55291	9631035	9631535	AT3G26280	Yes	NA	Yes	2.72569	1.28095	Chr3	9630199	9632009	+	545	+	607	interaction106665	9376	9	0.070444	0.260361	1	0.070444	100	-0.458137	548	541	-11.528	800	-4	0.0593273	0.833793	0.247316	0.351613
20451052	20451552	AT1G54830	Chr1	20451082	20452671	NA	NA	Yes	1.88708	0.498283	20440450	20440950	AT1G54780	NA	NA	NA	0.293531	0.350505	Chr1	20439433	20441159	+	706	+	899	interaction34054	10602	9	0.070444	0.262535	1	0.070444	100	-0.458174	581	1039	-11.5253	800	-4	-0.0529012	0.885391	-0.189254	0.262451
5238557	5239057	AT5G16030	Chr5	5238177	5240748	NA	NA	Yes	2.05569	0.651211	5229450	5229950	AT5G16020	NA	Yes	Yes	0.329155	0.465745	Chr5	5229691	5232241	+	950	+	522	interaction165442	9107	9	0.070444	0.259928	1	0.070444	100	-0.458178	898	586	-11.525	800	-4	-0.463961	0.0202085	-1.26454	NA
29195553	29196053	AT1G77680	Chr1	29191833	29196287	NA	NA	Yes	0.266894	0.343267	29179534	29180034	AT1G77640	NA	Yes	Yes	6.62309	12.5146	Chr1	29178736	29179675	+	665	+	1428	interaction55915	16019	9	0.070444	0.262094	1	0.070444	100	-0.458195	606	1114	-11.5237	800	-4	-0.292507	0.222011	1.37084	0.00162552
2858489	2858989	AT3G09300	Chr3	2857846	2860668	NA	NA	NA	1.39047	1.08332	2843583	2844083	AT3G09260	Yes	NA	Yes	2.14396	1.64577	Chr3	2840476	2843781	+	1540	+	766	interaction93491	14906	9	0.070444	0.263134	1	0.070444	100	-0.458207	1358	622	-11.5228	800	-4	0.0176437	0.963954	0.530812	1.73e-06
26749037	26749537	AT1G70944	Chr1	26749136	26749253	NA	NA	Yes	0.178918	0.23374	26745000	26745500	AT1G70940	NA	NA	NA	0.208851	0.277016	Chr1	26743053	26746395	+	1776	+	49	interaction51011	4037	8	0.070444	1	1	0.070444	100	-0.428752	1598	10	-11.5223	700	-4	1.21356	NA	0.170567	0.568765
8097551	8098051	AT2G18690	Chr2	8097419	8098827	Yes	NA	Yes	7.82011	17.0517	8084030	8084530	AT2G18640	NA	NA	Yes	0.545465	0.779778	Chr2	8083739	8084888	+	748	+	887	interaction64661	13521	9	0.070444	0.262951	1	0.070444	100	-0.45829	755	1038	-11.5167	800	-4	0.417622	0.228022	-0.583767	0.767875
21585112	21585612	AT3G58320	Chr3	21585566	21586328	Yes	NA	Yes	0.276721	0.358543	21584372	21584872	AT3G58310	Yes	NA	Yes	4.69601	1.82729	Chr3	21584037	21585030	+	879	+	987	interaction121497	740	9	0.070444	0.264036	1	0.070444	100	-0.458421	1147	1239	-11.507	800	-4	1.71817	NA	NA	NA
21185589	21186089	AT5G52140	Chr5	21184521	21186872	Yes	NA	Yes	0.229121	0.241743	21178446	21178946	AT5G52120	Yes	NA	Yes	1.85984	0.579014	Chr5	21176421	21180310	+	1180	+	134	interaction188395	7143	14	0.070444	1e-06	3	0.070444	300	-2.53314	1239	104	-11.5054	1100	-10	NA	NA	1.57084	5.45e-15
580468	580968	AT4G01420	Chr4	580037	581518	Yes	NA	Yes	1.74082	1.48419	579128	579628	AT4G01410	NA	Yes	Yes	3.46604	5.4189	Chr4	578164	579169	+	110	+	576	interaction126168	1340	16	0.070444	0	4	0.070444	400	-3.99973	92	545	-11.4924	1200	-12	2.83467	0.0302467	0.347136	0.156773
7046972	7047472	AT1G20360	Chr1	7046503	7047744	NA	NA	Yes	1.73345	2.30903	7043849	7044349	AT1G20350	NA	Yes	Yes	1.88131	3.16467	Chr1	7043712	7044592	+	229	+	843	interaction13475	3123	27	0.070444	0	10	0.070444	1000	-16.1633	241	658	-11.4923	1700	-26	NA	NA	1.55797	0.000371021
1149555	1150055	AT2G03760	Chr2	1149336	1150663	NA	NA	NA	0.144338	0.251884	1148445	1148945	AT2G03750	NA	NA	Yes	1.5609	1.69864	Chr2	1147806	1149061	+	573	+	1503	interaction59977	1110	59	0.070444	0	32	0.070444	3200	-83.5622	461	1468	-11.4869	2700	-74	0.356801	0.209063	-0.137053	0.607994
6525440	6525940	AT3G18930	Chr3	6523378	6525543	NA	NA	NA	1.60138	1.42379	6521471	6521971	AT3G18910	NA	NA	NA	0.136758	0.231073	Chr3	6521718	6523043	+	686	+	125	interaction99324	3969	14	0.070444	1e-06	3	0.070444	300	-2.53252	542	110	-11.4781	1100	-10	0.0570674	0.899451	0.0325057	0.952581
10940896	10941396	AT4G20260	Chr4	10940745	10943561	NA	NA	NA	0.476167	0.653629	10940008	10940508	AT4G20250	Yes	NA	Yes	1.0701	0.530399	Chr4	10937989	10940528	+	286	+	1240	interaction140847	888	22	0.070444	0	7	0.070444	700	-9.44701	291	1075	-11.4773	1500	-18	0.846679	6.26e-06	NA	NA
21387579	21388079	AT5G52760	Chr5	21386823	21387703	Yes	NA	Yes	9.34739	9.6097	21383970	21384470	AT5G52750	NA	NA	Yes	1.07055	0.272198	Chr5	21384042	21384924	+	1041	+	111	interaction188917	3609	16	0.070444	0	4	0.070444	400	-3.99896	1038	94	-11.477	1200	-12	0.328678	0.801131	0.785165	0.0467357
18309107	18309607	AT2G44310	Chr2	18309211	18309826	NA	NA	Yes	0.19849	0.262659	18307929	18308429	AT2G44300	NA	NA	Yes	0.981087	1.12576	Chr2	18307308	18308349	+	597	+	1490	interaction86060	1178	35	0.070444	0	15	0.070444	1500	-29.0886	366	1349	-11.4753	2000	-36	0.110757	0.73263	-0.311117	0.174438
7919042	7919542	AT1G22430	Chr1	7919143	7921832	NA	NA	Yes	0.625856	0.640061	7914462	7914962	AT1G22410	NA	NA	NA	0.226882	0.337145	Chr1	7912045	7915003	+	736	+	109	interaction15315	4580	14	0.070444	1e-06	3	0.070444	300	-2.53243	559	111	-11.4739	1100	-10	0.0661309	0.799532	-0.206087	0.171947
25458975	25459475	AT5G63595	Chr5	25459086	25460436	NA	NA	Yes	7.04495	2.85312	25455559	25456059	AT5G63580	Yes	NA	Yes	6.59205	3.69544	Chr5	25454729	25456476	+	82	+	1710	interaction196323	3416	31	0.070444	0	14	0.070444	1400	-27.373	68	1798	-11.4721	1700	-32	0.143051	0.841326	0.9069	0.0318131
3024031	3024531	AT3G09850	Chr3	3023210	3025851	NA	NA	NA	9.55835	6.01835	3019074	3019574	AT3G09840	NA	NA	NA	0.133766	0.228379	Chr3	3019339	3023052	+	86	+	784	interaction93906	4957	16	0.070444	0	4	0.070444	400	-3.99858	95	620	-11.4695	1200	-12	-0.0506425	0.844664	-0.0817711	0.697657
18525072	18525572	AT2G44920	Chr2	18524386	18526827	NA	NA	Yes	0.211789	0.276859	18517429	18517929	AT2G44910	NA	Yes	Yes	1.72594	2.80679	Chr2	18517886	18519525	+	1962	+	95	interaction86330	7643	21	0.070444	0	7	0.070444	700	-9.63285	2121	67	-11.4683	1400	-18	-0.0421413	0.87901	-0.759069	0.131691
15107153	15107653	AT2G35960	Chr2	15106939	15107993	NA	Yes	Yes	0.133322	0.226589	15104577	15105077	AT2G35950	NA	NA	Yes	0.174064	0.220957	Chr2	15104760	15106088	+	860	+	136	interaction79038	2576	14	0.070444	1e-06	3	0.070444	300	-2.53224	825	113	-11.4657	1100	-10	-0.270126	0.118354	0.306242	0.58194
2645424	2645924	AT3G08710	Chr3	2645166	2646497	NA	NA	NA	7.16894	2.39739	2633984	2634484	AT3G08670	NA	NA	NA	0.130824	0.253939	Chr3	2633727	2636715	+	1633	+	131	interaction93072	11440	16	0.070444	0	4	0.070444	400	-3.99821	1557	96	-11.4622	1200	-12	0.193047	0.392869	-0.0781925	0.839334
11433939	11434439	AT1G31860	Chr1	11434107	11436607	NA	NA	NA	0.150304	0.24275	11430510	11431010	AT1G31850	NA	NA	NA	0.126185	0.233406	Chr1	11430221	11433699	+	105	+	1628	interaction22527	3429	34	0.070444	0	16	0.070444	1600	-33.0754	78	1748	-11.4579	1800	-36	-0.0188691	0.967616	-0.0841958	0.780343
17713071	17713571	AT2G42550	Chr2	17713195	17714230	NA	Yes	Yes	4.708	1.06649	17711543	17712043	AT2G42540	NA	Yes	Yes	3.69679	7.26009	Chr2	17711031	17712330	+	93	+	650	interaction84586	1528	14	0.070444	1e-06	3	0.070444	300	-2.53206	115	405	-11.4577	1100	-10	-1.60131	NA	-0.391446	0.786404
21330490	21330990	AT3G57590	Chr3	21330181	21331396	NA	NA	NA	0.114699	0.240376	21321527	21322027	AT3G57580	NA	NA	NA	0.141888	0.256426	Chr3	21320490	21322379	+	1810	+	132	interaction120929	8963	28	0.070444	0	11	0.070444	1100	-18.7826	1603	128	-11.44	1700	-28	0.105917	0.832856	-0.0694379	0.919373
17776922	17777422	AT4G37800	Chr4	17775473	17777397	NA	NA	Yes	0.162042	0.209937	17752984	17753484	AT4G37770	NA	Yes	Yes	11.4652	16.8782	Chr4	17752083	17754157	+	1966	+	121	interaction153959	23938	14	0.070444	1e-06	3	0.070444	300	-2.53155	1864	121	-11.4356	1100	-10	-0.00687925	0.982631	1.16752	0.103918
4988986	4989486	AT5G15360	Chr5	4987436	4989182	NA	NA	NA	10.7503	3.10057	4981019	4981519	AT5G15330	NA	NA	NA	0.13877	0.267595	Chr5	4980487	4982231	+	100	+	1574	interaction165268	7967	16	0.070444	0	4	0.070444	400	-3.99682	100	1541	-11.4345	1200	-12	0.239494	0.916966	0.395505	0.188686
23742094	23742594	AT5G58787	Chr5	23742449	23744619	NA	NA	NA	2.73857	2.61453	23741148	23741648	AT5G58784	NA	Yes	Yes	1.73986	2.41588	Chr5	23739949	23741279	+	908	+	242	interaction193458	946	20	0.070444	0	6	0.070444	600	-7.48677	716	179	-11.4238	1400	-16	0.260135	0.19545	0.844022	0.224883
24620032	24620532	AT1G66140	Chr1	24619836	24622004	NA	NA	Yes	10.8745	5.94118	24614927	24615427	AT1G66130	NA	Yes	Yes	0.597034	0.624634	Chr1	24614961	24616930	+	119	+	960	interaction45202	5105	14	0.070444	1e-06	3	0.070444	300	-2.53117	126	790	-11.4188	1100	-10	-0.329717	0.0854657	0.108593	0.697656
29744351	29744851	AT1G79070	Chr1	29744669	29745815	NA	NA	NA	1.96052	2.56632	29742042	29742542	AT1G79060	NA	NA	NA	0.26449	0.532977	Chr1	29741747	29743600	+	123	+	690	interaction57569	2309	16	0.070444	0	4	0.070444	400	-3.99584	103	682	-11.4153	1200	-12	0.047759	0.939814	-0.149371	0.643556
16588981	16589481	AT5G41450	Chr5	16588599	16589094	NA	NA	Yes	0.376143	0.525033	16586006	16586506	AT5G41430	NA	NA	Yes	2.10127	0.345108	Chr5	16586118	16586604	+	284	+	1476	interaction180061	2975	44	0.070444	0	22	0.070444	2200	-50.6645	178	1754	-11.4103	2200	-50	-2.61046	NA	-0.214409	NA
20441574	20442074	AT3G55150	Chr3	20440549	20442604	NA	NA	NA	11.6991	14.183	20435994	20436494	AT3G55130	NA	Yes	Yes	11.0879	21.9888	Chr3	20433877	20436390	+	114	+	838	interaction119619	5580	14	0.070444	1e-06	3	0.070444	300	-2.53095	129	838	-11.4094	1100	-10	0.126732	0.835598	-0.470493	0.00598574
24432436	24432936	AT1G65690	Chr1	24431429	24432953	Yes	NA	Yes	0.163482	0.280099	24429999	24430499	AT1G65681	Yes	NA	Yes	5.13604	1.8485	Chr1	24428874	24430670	+	1560	+	411	interaction44137	2437	38	0.070444	0	17	0.070444	1700	-34.7251	1714	441	-11.3956	2100	-40	0.0963199	0.80684	NA	NA
24500982	24501482	AT1G65860	Chr1	24499065	24502745	Yes	NA	Yes	0.163824	0.172351	24494544	24495044	AT1G65850	Yes	NA	Yes	6.02555	2.84381	Chr1	24494677	24498542	+	156	+	1049	interaction44637	6438	18	0.070444	0	5	0.070444	500	-5.65985	129	1089	-11.3919	1300	-14	0.408312	0.0526188	0.967177	0.120378
14394964	14395464	AT2G34110	Chr2	14392550	14403317	Yes	NA	Yes	0.536757	0.626718	14383507	14384007	AT2G34050	NA	NA	NA	0.170206	0.244776	Chr2	14382682	14384279	+	1015	+	133	interaction77281	11457	14	0.070444	1e-06	3	0.070444	300	-2.5303	817	139	-11.3811	1100	-10	NA	NA	-0.0722627	0.881915
8405532	8406032	AT5G24570	Chr5	8405680	8406132	NA	NA	Yes	0.388473	0.623839	8403025	8403525	AT5G24560	Yes	NA	Yes	8.03528	5.25857	Chr5	8402204	8403266	+	172	+	667	interaction172099	2507	14	0.070444	1e-06	3	0.070444	300	-2.53024	140	544	-11.3785	1100	-10	0.579673	0.0523947	1.21356	NA
7039146	7039646	AT2G16240	Chr2	7039093	7039165	NA	NA	NA	0.219635	0.259767	7035046	7035546	AT2G16230	Yes	NA	Yes	6.50323	2.46874	Chr2	7035462	7038326	+	1816	+	234	interaction62220	4100	20	0.070444	0	6	0.070444	600	-7.48136	1371	197	-11.378	1400	-16	NA	NA	0.0168442	0.990874
7033993	7034493	AT1G20320	Chr1	7033656	7034874	NA	Yes	Yes	2.26049	2.24692	7032654	7033154	AT1G20310	NA	Yes	Yes	2.14381	3.26437	Chr1	7032289	7033208	+	540	+	521	interaction13366	1339	38	0.070444	0	17	0.070444	1700	-34.7147	458	528	-11.3772	2100	-40	3.05929	NA	0.771267	0.665704
11983880	11984380	AT4G22810	Chr4	11984139	11985702	Yes	NA	Yes	0.138053	0.249635	11980543	11981043	AT4G22800	Yes	NA	Yes	3.08103	1.49837	Chr4	11978004	11983071	+	1188	+	69	interaction143204	3337	21	0.070444	0	7	0.070444	700	-9.61882	1184	71	-11.3715	1400	-18	0.215548	0.579594	NA	NA
17116995	17117495	AT2G41020	Chr2	17117262	17121119	NA	NA	NA	0.29611	0.290054	17106518	17107018	AT2G40990	NA	NA	Yes	3.11988	3.47685	Chr2	17105096	17106773	+	237	+	1369	interaction82876	10477	14	0.070444	2e-06	3	0.070444	300	-2.52995	145	1829	-11.3661	1100	-10	0.013165	0.975339	NA	NA
28544973	28545473	AT1G76065	Chr1	28544337	28545376	NA	NA	Yes	5.46273	3.29631	28543425	28543925	AT1G76060	NA	NA	Yes	0.158097	0.289447	Chr1	28543099	28543850	+	549	+	972	interaction54923	1548	38	0.070444	0	17	0.070444	1700	-34.7083	469	724	-11.366	2100	-40	0.0545105	0.947955	0.11613	0.742843
9436478	9436978	AT4G16770	Chr4	9434392	9437172	NA	NA	Yes	0.202571	0.138972	9432436	9432936	AT4G16765	NA	NA	NA	0.15758	0.204957	Chr4	9429874	9432437	+	1587	+	75	interaction137573	4042	22	0.070444	0	8	0.070444	800	-11.9351	1635	51	-11.363	1400	-20	0.297064	0.333887	-0.0247293	0.955614
5871531	5872031	AT5G17790	Chr5	5869709	5872718	NA	Yes	Yes	8.15036	2.45421	5866003	5866503	AT5G17770	NA	NA	Yes	0.221445	0.262422	Chr5	5864250	5866709	+	1083	+	189	interaction166387	5528	25	0.070444	0	9	0.070444	900	-13.8789	1564	160	-11.3588	1600	-22	-0.11409	0.717119	-0.00186856	0.99512
11393490	11393990	AT2G26740	Chr2	11392964	11394279	NA	NA	Yes	0.284729	0.418012	11386012	11386512	AT2G26720	NA	NA	Yes	9.39513	11.2312	Chr2	11384781	11385402	+	1840	+	81	interaction69780	7478	19	0.070444	0	6	0.070444	600	-7.63255	1878	53	-11.3577	1300	-16	0.376494	0.00332589	0.16159	NA
3426488	3426988	AT3G10960	Chr3	3424812	3426997	NA	NA	Yes	0.941328	0.348306	3420559	3421059	AT3G10930	NA	NA	NA	0.227983	0.242401	Chr3	3420129	3420832	+	1832	+	133	interaction94870	5929	14	0.070444	1e-06	3	0.070444	300	-2.52968	1406	150	-11.3545	1100	-10	0.184844	0.585794	0.652266	0.0788643
21932940	21933440	AT1G59680	Chr1	21933020	21934216	Yes	NA	Yes	0.323233	0.389404	21931462	21931962	AT1G59675	Yes	NA	Yes	12.6208	7.23303	Chr1	21931832	21932403	+	1761	+	652	interaction37281	1478	32	0.070444	0	13	0.070444	1300	-23.5939	1931	580	-11.3525	1900	-32	NA	NA	NA	NA
4126434	4126934	AT1G12160	Chr1	4126065	4128310	NA	NA	Yes	5.05199	3.43852	4115926	4116426	AT1G12120	NA	NA	NA	0.17887	0.265095	Chr1	4114770	4117594	+	1691	+	126	interaction7912	10508	14	0.070444	1e-06	3	0.070444	300	-2.52958	1903	152	-11.3501	1100	-10	0.349313	0.303605	0.199108	0.345256
23848523	23849023	AT5G59080	Chr5	23847404	23848557	NA	NA	Yes	2.37863	1.3812	23846055	23846555	AT5G59070	NA	Yes	Yes	0.761404	1.34453	Chr5	23845197	23847393	+	723	+	414	interaction193744	2468	14	0.070444	2e-06	3	0.070444	300	-2.52958	596	152	-11.3501	1100	-10	-0.235106	0.441129	-0.0503359	0.97005
5861999	5862499	AT5G17760	Chr5	5860420	5862422	NA	NA	Yes	0.342064	0.289644	5859513	5860013	AT5G17750	NA	NA	Yes	15.8035	23.9503	Chr5	5858694	5860041	+	216	+	890	interaction166349	2486	20	0.070444	0	6	0.070444	600	-7.47757	212	703	-11.346	1400	-16	-0.109735	0.82235	NA	NA
21811962	21812462	AT5G53740	Chr5	21811632	21814908	Yes	NA	Yes	0.81972	0.982714	21795476	21795976	AT5G53660	NA	NA	Yes	0.183691	0.227626	Chr5	21794535	21796046	+	1350	+	146	interaction189420	16486	14	0.070444	1e-06	3	0.070444	300	-2.52948	1209	154	-11.3459	1100	-10	-3.56761	NA	-0.628698	0.615044
10346501	10347001	AT4G18870	Chr4	10346167	10347228	Yes	NA	Yes	3.09916	2.95455	10344522	10345022	AT4G18860	Yes	NA	Yes	2.75274	1.76644	Chr4	10344686	10345588	+	992	+	327	interaction139312	1979	42	0.070444	0	20	0.070444	2000	-43.8495	684	312	-11.3446	2200	-46	2.94581	NA	NA	NA
16621972	16622472	AT5G41560	Chr5	16621250	16622656	NA	NA	Yes	1.49512	1.22524	16620102	16620602	AT5G41550	NA	NA	Yes	3.61216	2.61629	Chr5	16617231	16620785	+	738	+	1794	interaction180332	1870	51	0.070444	0	26	0.070444	2600	-62.685	661	1849	-11.3359	2500	-60	0.212331	0.461652	0.713237	0.278158
21950137	21950637	AT3G59410	Chr3	21950187	21959266	NA	NA	NA	0.131121	0.215262	21949038	21949538	AT3G59400	NA	NA	Yes	0.259144	0.500278	Chr3	21948716	21949710	+	760	+	922	interaction122834	1099	22	0.070444	0	7	0.070444	700	-9.42451	502	985	-11.333	1500	-18	-0.175955	0.523659	-0.208162	0.243865
19269534	19270034	AT2G46900	Chr2	19269557	19272195	NA	NA	NA	10.0455	20.7367	19267510	19268010	AT2G46890	Yes	NA	Yes	0.392231	0.32562	Chr2	19266732	19268170	+	160	+	1103	interaction87691	2024	16	0.070444	0	4	0.070444	400	-3.99125	120	940	-11.3259	1200	-12	0.126129	0.577164	-0.307261	0.239837
25909986	25910486	AT5G64813	Chr5	25910278	25912896	NA	NA	Yes	0.498345	0.323942	25908996	25909496	AT5G64810	NA	NA	Yes	4.23481	3.43313	Chr5	25908412	25909803	+	228	+	1594	interaction197038	990	59	0.070444	0	34	0.070444	3400	-93.5337	145	1600	-11.3255	2500	-76	0.109467	0.654096	-0.325496	0.827346
19267516	19268016	AT3G51915	Chr3	19267233	19267784	NA	NA	NA	0.158843	0.230095	19265366	19265866	AT3G51910	NA	NA	Yes	0.127921	0.186933	Chr3	19265293	19266619	+	194	+	1540	interaction117421	2150	41	0.070444	0	20	0.070444	2000	-44.4095	160	1459	-11.323	2100	-46	NA	NA	0.740055	0.00194321
9846046	9846546	AT4G17690	Chr4	9846126	9847107	NA	NA	Yes	4.364	3.1078	9843509	9844009	AT4G17680	NA	NA	Yes	2.10718	2.47626	Chr4	9842871	9844265	+	37	+	587	interaction138190	2537	8	0.070444	1	1	0.070444	100	-0.431543	11	445	-11.317	700	-4	0.117652	NA	-0.378918	0.100696
2866613	2867113	AT5G09220	Chr5	2866251	2869054	NA	NA	Yes	0.197443	0.376616	2864505	2865005	AT5G09210	NA	NA	Yes	4.15326	4.77299	Chr5	2862609	2865359	+	21	+	1224	interaction161368	2108	8	0.070444	0.742163	1	0.070444	100	-0.431543	11	1680	-11.317	700	-4	-0.781818	5.07e-08	-0.605386	0.758335
1163619	1164119	AT1G04340	Chr1	1163096	1164851	NA	NA	NA	0.187023	0.288647	1161468	1161968	AT1G04330	NA	Yes	Yes	3.95829	6.86728	Chr1	1161310	1161982	+	34	+	884	interaction2595	2151	13	0.070444	3e-06	3	0.070444	300	-2.56686	27	857	-11.3102	1000	-10	-0.0150078	0.974052	-0.0887793	0.912703
23863963	23864463	AT5G59110	Chr5	23863529	23864048	Yes	NA	Yes	5.24905	3.42529	23861930	23862430	AT5G59100	Yes	NA	Yes	4.29372	4.35713	Chr5	23858893	23862129	+	203	+	646	interaction193819	2033	14	0.070444	1e-06	3	0.070444	300	-2.52838	180	463	-11.2992	1100	-10	NA	NA	0.252965	NA
15957458	15957958	AT5G39860	Chr5	15957416	15958455	NA	NA	Yes	0.50432	0.51261	15950103	15950603	AT5G39850	Yes	NA	Yes	1.60138	1.42379	Chr5	15950021	15951425	+	130	+	959	interaction178784	7355	16	0.070444	0	4	0.070444	400	-3.98932	129	910	-11.2886	1200	-12	-0.846393	0.00114672	0.282386	0.25213
3063898	3064398	AT3G09970	Chr3	3063773	3065575	NA	NA	Yes	0.404612	0.481696	3062460	3062960	AT3G09960	NA	NA	Yes	2.84564	3.28061	Chr3	3061951	3063594	+	298	+	786	interaction94113	1438	30	0.070444	0	12	0.070444	1200	-21.1271	257	618	-11.2849	1800	-30	-0.0937512	0.812759	0.271245	0.686467
14630117	14630617	AT2G34690	Chr2	14630306	14632061	NA	NA	NA	0.124137	0.188599	14628932	14629432	AT2G34680	NA	NA	NA	0.122736	0.197258	Chr2	14616621	14629129	+	870	+	246	interaction78014	1185	14	0.070444	2e-06	3	0.070444	300	-2.52798	718	192	-11.282	1100	-10	0.235034	0.200767	-0.39582	0.021833
1590449	1590949	AT1G05420	Chr1	1590072	1590753	NA	Yes	Yes	8.97944	16.4246	1584068	1584568	AT1G05400	NA	Yes	Yes	3.00809	5.75548	Chr1	1584072	1585421	+	202	+	1255	interaction3279	6381	18	0.070444	0	5	0.070444	500	-5.65013	160	1250	-11.2759	1300	-14	0.0387284	0.975063	-0.20071	0.871424
17136563	17137063	AT3G46550	Chr3	17136455	17137874	NA	NA	NA	11.7039	7.18683	17133986	17134486	AT3G46540	NA	NA	NA	0.43855	0.336058	Chr3	17134090	17135587	+	419	+	1601	interaction112595	2577	27	0.070444	0	10	0.070444	1000	-16.1027	396	1685	-11.2689	1700	-26	-0.348392	0.119727	-0.149624	0.589734
9261380	9261880	AT5G26570	Chr5	9261579	9267729	NA	NA	NA	0.171118	0.302135	9258907	9259407	AT5G26360	NA	NA	NA	0.168265	0.272183	Chr5	9255052	9258991	+	1418	+	104	interaction173719	2473	21	0.070444	0	7	0.070444	700	-9.60344	1280	76	-11.2673	1400	-18	-0.299728	0.250304	-0.216319	0.124431
13298097	13298597	AT4G26260	Chr4	13297697	13300387	Yes	NA	Yes	0.15509	0.236422	13290907	13291407	AT4G26250	Yes	NA	Yes	9.85199	8.7342	Chr4	13289640	13291084	+	1591	+	41	interaction146869	7190	11	0.070444	0.001057	2	0.070444	200	-1.33106	1418	27	-11.2578	900	-6	1.57448	0.00223181	1.21356	NA
1935954	1936454	AT5G06340	Chr5	1936365	1938114	NA	Yes	NA	5.317	4.84203	1935050	1935550	AT5G06330	NA	NA	Yes	8.57133	16.4949	Chr5	1934738	1935644	+	877	+	1111	interaction159357	904	59	0.070444	0	32	0.070444	3200	-83.2699	638	891	-11.2489	2700	-72	-0.0281463	0.923175	0.148468	0.750931
21012025	21012525	AT5G51730	Chr5	21011417	21013657	NA	Yes	Yes	0.12147	0.232204	21009964	21010464	AT5G51720	NA	Yes	Yes	2.9881	5.39122	Chr5	21009591	21010345	+	1681	+	542	interaction187831	2061	27	0.070444	0	10	0.070444	1000	-16.0945	1974	434	-11.2393	1700	-26	0.208336	0.428774	0.632809	0.00571824
18775888	18776388	AT2G45560	Chr2	18776051	18778510	NA	NA	Yes	0.252984	0.369888	18775046	18775546	AT2G45550	NA	NA	Yes	1.7623	2.08256	Chr2	18773540	18775654	+	528	+	348	interaction86661	842	14	0.070444	2e-06	3	0.070444	300	-2.52683	531	237	-11.2336	1100	-10	-0.186582	0.428959	3.45545	NA
12619483	12619983	AT2G29430	Chr2	12619553	12620027	Yes	NA	Yes	0.295288	0.390122	12618020	12618520	AT2G29420	NA	NA	Yes	0.353642	0.256145	Chr2	12617935	12618899	+	1539	+	130	interaction72549	1463	23	0.070444	0	8	0.070444	800	-11.6793	1500	115	-11.2251	1500	-20	0.741156	NA	0.374591	0.0258961
28435006	28435506	AT1G75720	Chr1	28434567	28435489	NA	NA	Yes	0.274579	0.301664	28433972	28434472	AT1G75717	NA	NA	Yes	9.35496	7.8058	Chr1	28433918	28434261	+	1129	+	285	interaction54671	1034	59	0.070444	0	33	0.070444	3300	-87.9393	1144	271	-11.2249	2600	-74	0.535883	0.557678	0.849079	NA
5834117	5834617	AT1G17060	Chr1	5832096	5835456	NA	NA	Yes	1.21966	1.55959	5828989	5829489	AT1G17050	NA	NA	NA	0.187126	0.296728	Chr1	5829079	5831343	+	271	+	859	interaction11479	5128	14	0.070444	2e-06	3	0.070444	300	-2.52656	251	776	-11.2222	1100	-10	0.890189	5.39e-05	-0.139368	0.43102
9241014	9241514	AT5G26320	Chr5	9238309	9241236	Yes	NA	Yes	0.65967	1.09564	9235503	9236003	AT5G26310	NA	NA	Yes	11.8847	20.4173	Chr5	9234684	9236385	+	140	+	1318	interaction173664	5511	23	0.070444	0	8	0.070444	800	-11.6776	116	1321	-11.2162	1500	-20	0.620644	0.515398	0.0139445	0.981623
7548495	7548995	AT4G12900	Chr4	7548819	7549974	NA	NA	Yes	5.52519	3.03807	7546930	7547430	AT4G12890	Yes	NA	Yes	3.48578	1.35456	Chr4	7546376	7547641	+	138	+	1002	interaction133394	1565	26	0.070444	0	10	0.070444	1000	-16.3807	102	953	-11.2156	1600	-24	-0.774008	0.175298	-0.184137	0.926188
11486953	11487453	AT4G21600	Chr4	11485118	11487416	NA	Yes	Yes	0.448476	0.470602	11481382	11481882	AT4G21590	NA	NA	NA	0.381254	0.566474	Chr4	11480343	11482719	+	278	+	1580	interaction141550	5571	20	0.070444	0	6	0.070444	600	-7.46134	315	1851	-11.2115	1400	-16	0.447847	0.0403413	0.303672	0.749536
10343599	10344099	AT1G29600	Chr1	10344045	10346243	NA	NA	Yes	0.131466	0.205048	10340541	10341041	AT1G29590	NA	NA	NA	0.263751	0.315951	Chr1	10339936	10342848	+	94	+	1647	interaction20338	3058	25	0.070444	0	10	0.070444	1000	-16.6823	58	1867	-11.2084	1500	-24	-0.164835	0.717796	0.0327913	0.969416
10445674	10446174	AT3G28060	Chr3	10445859	10446846	NA	NA	Yes	5.24939	5.22624	10444899	10445399	AT3G28050	NA	NA	NA	0.200562	0.218348	Chr3	10442813	10445398	+	398	+	314	interaction108201	775	14	0.070444	2e-06	3	0.070444	300	-2.52622	271	282	-11.208	1100	-10	-1.30864	NA	-0.0328382	0.918355
7751072	7751572	AT1G22015	Chr1	7751001	7753519	Yes	NA	Yes	6.01815	2.48658	7749532	7750032	AT1G22010	Yes	NA	Yes	14.0881	8.84884	Chr1	7749570	7750062	+	192	+	966	interaction14732	1540	28	0.070444	0	11	0.070444	1100	-18.7111	158	1176	-11.205	1700	-26	1.21356	NA	NA	NA
16503538	16504038	AT2G39550	Chr2	16501622	16504304	Yes	NA	Yes	4.01791	3.8923	16501099	16501599	AT2G39540	Yes	NA	Yes	5.37168	3.46469	Chr2	16500865	16501241	+	309	+	788	interaction81571	2439	14	0.070444	2e-06	3	0.070444	300	-2.52608	280	698	-11.2022	1100	-10	0.0358678	0.925132	1.21356	NA
3957118	3957618	AT1G11730	Chr1	3957472	3960113	NA	NA	NA	0.209928	0.27782	3955503	3956003	AT1G11720	NA	NA	NA	0.134361	0.200031	Chr1	3951552	3957044	+	406	+	128	interaction7569	1615	16	0.070444	0	4	0.070444	400	-3.98435	389	160	-11.194	1200	-12	-0.208338	0.81997	-0.372148	0.00460318
9047430	9047930	AT1G26170	Chr1	9047432	9054589	NA	NA	NA	0.134844	0.228633	9045628	9046128	AT1G26160	NA	NA	NA	0.142471	0.202608	Chr1	9044440	9046979	+	325	+	454	interaction17592	1802	14	0.070444	2e-06	3	0.070444	300	-2.52568	310	447	-11.1856	1100	-10	-0.235918	0.189654	-0.0154146	0.967836
3696011	3696511	AT5G11530	Chr5	3695861	3701548	NA	Yes	Yes	0.447792	0.414756	3687383	3687883	AT5G11520	Yes	NA	Yes	0.234428	0.327052	Chr5	3685088	3687764	+	401	+	1385	interaction163157	8628	14	0.070444	2e-06	3	0.070444	300	-2.52553	323	911	-11.1794	1100	-10	-0.223988	0.353743	0.301817	0.106317
11138472	11138972	AT2G26160	Chr2	11137977	11139451	NA	NA	Yes	7.85596	6.57342	11135958	11136458	AT2G26150	NA	NA	Yes	0.518837	0.505175	Chr2	11135681	11137396	+	1124	+	126	interaction69462	2514	37	0.070444	0	18	0.070444	1800	-38.8352	1405	98	-11.1752	1900	-40	1.21356	NA	-0.787285	0.0326611
122078	122578	AT3G01324	Chr3	122139	122448	Yes	NA	Yes	0.135954	0.236311	120947	121447	AT3G01323	Yes	NA	Yes	5.19235	1.67604	Chr3	121056	121423	+	292	+	330	interaction88719	1131	16	0.070444	0	4	0.070444	400	-3.98269	174	362	-11.1629	1200	-12	NA	NA	NA	NA
11936504	11937004	AT2G28040	Chr2	11936053	11937401	NA	NA	Yes	1.62054	2.5828	11934961	11935461	AT2G28030	Yes	NA	Yes	6.42324	4.32392	Chr2	11934207	11935386	+	1151	+	1124	interaction70932	1543	62	0.070444	0	47	0.09526	3475.6	-138.573	1506	1324	-11.1617	2724.4	-78	-0.800352	0.385632	NA	NA
11479061	11479561	AT4G21585	Chr4	11477987	11479953	NA	NA	NA	1.18808	0.849008	11475532	11476032	AT4G21580	NA	NA	NA	0.159503	0.229051	Chr4	11475718	11477768	+	783	+	198	interaction141418	3529	16	0.070444	0	4	0.070444	400	-3.98247	975	176	-11.1588	1200	-12	-0.43847	0.322956	0.25507	0.190849
10529118	10529618	AT3G28230	Chr3	10529214	10530199	NA	NA	Yes	4.67852	0.86116	10525010	10525510	AT3G28220	Yes	NA	Yes	2.26931	1.14747	Chr3	10524403	10526728	+	1176	+	60	interaction108414	4108	15	0.070444	0	4	0.070444	400	-4.06117	1043	35	-11.1561	1100	-12	-1.55316	NA	0.375917	0.12467
9735111	9735611	AT5G27570	Chr5	9734895	9736131	NA	NA	Yes	0.379101	0.539942	9731459	9731959	AT5G27560	NA	NA	NA	0.14022	0.251612	Chr5	9731601	9733918	+	552	+	522	interaction174254	3652	14	0.070444	2e-06	3	0.070444	300	-2.52495	618	385	-11.1555	1100	-10	NA	NA	-0.0565642	0.843755
843166	843666	AT1G03400	Chr1	842746	844190	NA	NA	Yes	1.93899	2.18188	841505	842005	AT1G03390	NA	NA	Yes	0.481553	0.497125	Chr1	841032	842418	+	571	+	145	interaction1716	1661	35	0.070444	0	16	0.070444	1600	-32.441	634	133	-11.1515	1900	-38	0.357385	0.210303	-1.78564	NA
14565538	14566038	AT5G36925	Chr5	14565812	14566244	Yes	NA	Yes	10.6693	17.4902	14562574	14563074	AT5G36910	NA	NA	Yes	1.03488	0.77661	Chr5	14561816	14562750	+	675	+	735	interaction175127	2964	27	0.070444	0	10	0.070444	1000	-16.0642	674	692	-11.1314	1700	-24	1.49533	0.000102928	0.526687	0.0113631
5522979	5523479	AT1G16120	Chr1	5522638	5524983	NA	NA	Yes	0.201551	0.283705	5518515	5519015	AT1G16110	NA	NA	NA	0.174081	0.360832	Chr1	5518372	5520891	+	82	+	1464	interaction11025	4464	21	0.070444	0	7	0.070444	700	-9.58277	84	1431	-11.1304	1400	-18	0.355001	0.694374	0.857409	0.00223728
116947	117447	AT3G01328	Chr3	117253	117568	NA	NA	Yes	4.90323	5.90802	114969	115469	AT3G01326	Yes	NA	Yes	4.54089	2.27591	Chr3	115319	115756	+	1179	+	1005	interaction88660	1978	35	0.070444	0	15	0.070444	1500	-28.9184	1258	1102	-11.1256	2000	-36	NA	NA	NA	NA
12160482	12160982	AT1G33530	Chr1	12159883	12161314	Yes	NA	Yes	10.6797	9.98681	12158119	12158619	AT1G33520	NA	Yes	Yes	0.28257	0.381588	Chr1	12157155	12158953	+	70	+	1584	interaction23444	2363	24	0.070444	0	9	0.070444	900	-14.089	76	1586	-11.1251	1500	-22	NA	NA	0.113244	0.635348
977086	977586	AT1G03850	Chr1	976096	977761	NA	NA	Yes	2.54768	2.88088	961565	962065	AT1G03830	NA	NA	Yes	0.31279	0.367036	Chr1	962015	966757	+	1901	+	315	interaction2226	15521	16	0.070444	0	4	0.070444	400	-3.98007	1769	202	-11.114	1200	-12	0.912495	1.54e-06	-0.318071	0.306211
22748919	22749419	AT1G61640	Chr1	22746371	22749184	Yes	NA	Yes	0.112417	0.218385	22744533	22745033	AT1G61630	Yes	NA	Yes	9.0144	2.08375	Chr1	22744206	22746111	+	704	+	843	interaction39729	4386	14	0.070444	2e-06	3	0.070444	300	-2.52391	593	697	-11.1123	1100	-10	-0.248643	0.461652	1.02261	NA
13411962	13412462	AT2G31490	Chr2	13411982	13413246	NA	NA	NA	2.46578	4.21517	13408873	13409373	AT2G31480	Yes	NA	Yes	1.59034	1.14515	Chr2	13408977	13410999	+	278	+	691	interaction74796	3089	18	0.070444	0	5	0.070444	500	-5.63568	250	692	-11.1082	1300	-14	0.12884	0.568791	0.427159	0.841142
11714547	11715047	AT4G22115	Chr4	11714742	11715167	Yes	NA	Yes	5.37226	2.66309	11709939	11710439	AT4G22105	Yes	NA	Yes	4.20316	1.88048	Chr4	11710217	11710608	+	643	+	1405	interaction142378	4608	14	0.070444	2e-06	3	0.070444	300	-2.5238	628	1657	-11.1079	1100	-10	1.61886	NA	0.783336	NA
17688020	17688520	AT3G47940	Chr3	17687955	17689549	NA	NA	NA	0.142333	0.207967	17684447	17684947	AT3G47930	NA	NA	NA	0.14727	0.223183	Chr3	17684443	17687620	+	258	+	1643	interaction113983	3573	44	0.070444	0	22	0.070444	2200	-50.4334	217	1391	-11.107	2200	-50	0.0349774	0.94576	-0.266181	0.124256
9128429	9128929	AT2G21330	Chr2	9128146	9130240	NA	NA	Yes	9.47095	4.40432	9126956	9127456	AT2G21320	NA	NA	NA	0.189246	0.293775	Chr2	9126262	9127843	+	304	+	88	interaction66016	1473	24	0.070444	0	9	0.070444	900	-14.0837	262	77	-11.1012	1500	-22	-0.205801	0.216829	-0.769128	4.04e-08
15369551	15370051	AT3G43440	Chr3	15367595	15370059	NA	NA	NA	5.31213	1.02321	15354648	15355148	AT3G43430	NA	Yes	Yes	6.00857	9.19302	Chr3	15354534	15355304	+	19	+	1864	interaction110031	14903	8	0.070444	0.635875	1	0.070444	100	-0.433858	12	2087	-11.0973	700	-4	0.0452398	0.916621	0.323689	0.204358
21190936	21191436	AT3G57270	Chr3	21191236	21193189	NA	NA	Yes	1.03988	2.06064	21186939	21187439	AT3G57250	NA	NA	Yes	2.27454	1.5552	Chr3	21186718	21187251	+	22	+	1453	interaction120814	3997	8	0.070444	0.791732	1	0.070444	100	-0.433858	12	1543	-11.0973	700	-4	3.36167	NA	NA	NA
18801421	18801921	AT5G46350	Chr5	18801217	18804043	Yes	NA	Yes	0.170311	0.253248	18800053	18800553	AT5G46340	Yes	NA	Yes	0.482681	0.380188	Chr5	18795925	18800094	+	238	+	720	interaction184537	1368	16	0.070444	0	4	0.070444	400	-3.97915	214	549	-11.0971	1200	-12	0.00638991	0.995494	-0.0834852	0.784125
5147534	5148034	AT3G15300	Chr3	5147404	5148305	Yes	NA	Yes	9.94441	8.0223	5146491	5146991	AT3G15290	NA	Yes	Yes	0.258953	0.496067	Chr3	5144996	5146856	+	714	+	84	interaction97165	1043	21	0.070444	0	7	0.070444	700	-9.57604	632	87	-11.0866	1400	-18	-0.327719	0.326458	0.218008	0.287176
21343580	21344080	AT3G57630	Chr3	21339301	21343796	NA	Yes	Yes	0.134197	0.22932	21336436	21336936	AT3G57610	NA	Yes	NA	0.247066	0.434357	Chr3	21334283	21336674	+	124	+	1284	interaction121048	7144	21	0.070444	0	7	0.070444	700	-9.57604	87	1193	-11.0866	1400	-18	-0.317778	0.174667	-0.286156	0.0650463
19903536	19904036	AT3G53710	Chr3	19903312	19905489	NA	Yes	Yes	4.11536	6.53528	19900972	19901472	AT3G53700	NA	Yes	Yes	0.177267	0.300772	Chr3	19900279	19902884	+	101	+	1853	interaction118610	2564	42	0.070444	0	22	0.070444	2200	-51.7163	100	1654	-11.078	2000	-50	0.0540577	0.832987	-0.0621243	0.856288
10633938	10634438	AT4G19510	Chr4	10633684	10639001	NA	NA	Yes	0.358821	0.408166	10625600	10626100	AT4G19500	NA	NA	NA	0.119357	0.206694	Chr4	10625658	10631570	+	1725	+	332	interaction140002	8338	16	0.070444	0	4	0.070444	400	-3.97803	1679	231	-11.0763	1200	-12	0.185135	0.425004	-0.108983	0.657995
1590531	1591031	AT1G05420	Chr1	1590072	1590753	NA	Yes	Yes	8.97944	16.4246	1587128	1587628	AT1G05410	NA	Yes	Yes	0.459636	0.673725	Chr1	1585370	1587778	+	202	+	1714	interaction3283	3403	38	0.070444	0	18	0.070444	1800	-38.2309	160	1718	-11.0739	2000	-42	0.0387284	0.975063	-0.045458	0.911168
1496524	1497024	AT5G05070	Chr5	1496854	1498544	Yes	NA	Yes	1.19948	0.605045	1494996	1495496	AT5G05060	Yes	NA	Yes	5.00089	0.258912	Chr5	1493718	1495085	+	261	+	730	interaction158125	1528	16	0.070444	0	4	0.070444	400	-3.9769	251	689	-11.0555	1200	-12	NA	NA	1.66728	1.34e-33
13482045	13482545	AT2G31710	Chr2	13481792	13483124	NA	NA	Yes	0.539137	0.530854	13480035	13480535	AT2G31700	Yes	NA	Yes	1.81676	1.03071	Chr2	13480509	13481568	+	954	+	120	interaction74978	2010	37	0.070444	0	18	0.070444	1800	-38.7575	1084	103	-11.0391	1900	-40	0.268896	0.480315	NA	NA
2994419	2994919	AT1G09270	Chr1	2994368	2998222	NA	NA	NA	0.200103	0.263302	2993036	2993536	AT1G09260	NA	NA	Yes	1.8505	1.41419	Chr1	2993403	2993820	+	1511	+	51	interaction5537	1383	13	0.070444	7e-06	3	0.070444	300	-2.56078	1266	31	-11.0268	1000	-8	-0.0134076	0.966383	1.61886	NA
4868158	4868658	AT1G14250	Chr1	4868451	4871488	NA	NA	Yes	2.33592	2.0493	4864467	4864967	AT1G14240	NA	NA	Yes	4.96026	5.22761	Chr1	4864901	4868000	+	697	+	420	interaction9932	3691	18	0.070444	0	5	0.070444	500	-5.62774	744	363	-11.0183	1300	-14	0.406345	0.0975081	0.395766	0.250748
7978991	7979491	AT2G18360	Chr2	7976711	7979377	Yes	NA	Yes	1.03591	1.43593	7970124	7970624	AT2G18340	NA	NA	Yes	1.5289	1.16965	Chr2	7969319	7971114	+	1347	+	1155	interaction64169	8867	20	0.080459	0	6	0.080468	525.256	-7.43642	1276	1320	-11.0113	1225.78	-16	0.159418	0.665371	2.15086	0.230808
8595943	8596443	AT5G24950	Chr5	8595208	8597761	Yes	NA	Yes	0.728363	0.537802	8592554	8593054	AT5G24940	NA	NA	Yes	1.30614	0.768232	Chr5	8591406	8593601	+	124	+	1575	interaction172208	3389	27	0.070444	0	11	0.070444	1100	-18.9849	84	1617	-11.0105	1600	-26	5.33026	NA	0.0846936	NA
19141469	19141969	AT3G51610	Chr3	19139551	19142085	NA	Yes	NA	2.53469	2.17521	19138617	19139117	AT3G51600	NA	Yes	Yes	1.73722	3.31711	Chr3	19138393	19139252	+	211	+	1223	interaction117162	2852	23	0.070444	0	8	0.070444	800	-11.6368	147	1114	-11.0067	1500	-20	0.192806	0.331179	0.185331	0.361568
961543	962043	AT1G03830	Chr1	962015	966757	NA	NA	Yes	0.31279	0.367036	960422	960922	AT1G03820	Yes	NA	Yes	3.71847	1.62128	Chr1	959868	960728	+	315	+	1271	interaction2092	1121	34	0.070444	0	15	0.070444	1500	-29.3004	202	1521	-11.0002	1900	-34	-0.318071	0.306211	-0.090703	0.810947
4486648	4487148	AT5G13920	Chr5	4485930	4487433	NA	NA	NA	2.81935	0.876528	4485056	4485556	AT5G13917	NA	NA	NA	0.533998	0.264455	Chr5	4485167	4485311	+	1307	+	139	interaction164626	1592	37	0.070444	0	18	0.070444	1800	-38.7287	1445	105	-10.9893	1900	-40	-0.372074	0.523685	NA	NA
18954496	18954996	AT1G51170	Chr1	18953457	18954892	NA	NA	Yes	4.91128	2.66979	18949523	18950023	AT1G51160	NA	NA	Yes	0.273935	0.301904	Chr1	18949590	18951783	+	1620	+	138	interaction29129	4973	26	0.070444	0	10	0.070444	1000	-16.3179	1610	122	-10.9826	1600	-24	-0.0704505	0.859298	-0.0938751	0.730744
21043553	21044053	AT5G51795	Chr5	21043082	21044194	Yes	NA	Yes	2.50204	4.60366	21034578	21035078	AT5G51780	Yes	NA	Yes	8.58705	5.60031	Chr5	21034822	21036773	+	431	+	1254	interaction188057	8975	18	0.070444	0	5	0.070444	500	-5.62411	458	1402	-10.9777	1300	-14	1.29032	8.91e-08	0.967432	3.45e-09
18153122	18153622	AT3G48970	Chr3	18152287	18153375	Yes	NA	Yes	0.949966	0.840232	18149027	18149527	AT3G48950	NA	NA	Yes	1.17001	1.15614	Chr3	18148016	18149987	+	732	+	354	interaction114875	4095	16	0.070444	0	4	0.070444	400	-3.97259	708	375	-10.9771	1200	-12	0.174257	0.817475	NA	NA
3705493	3705993	AT1G11100	Chr1	3703671	3709302	NA	NA	NA	0.125338	0.209007	3703108	3703608	AT1G11090	NA	NA	Yes	0.22345	0.300314	Chr1	3702607	3703779	+	201	+	1041	interaction6853	2385	31	0.070444	0	13	0.070444	1300	-23.8259	196	1061	-10.976	1800	-32	-0.248016	0.52627	-0.115001	0.72829
9814053	9814553	AT3G26710	Chr3	9813370	9814750	NA	NA	NA	0.385674	0.225089	9811012	9811512	AT3G26700	NA	NA	NA	0.115094	0.187014	Chr3	9809949	9812664	+	1859	+	39	interaction107059	3041	13	0.070444	4e-06	3	0.070444	300	-2.55951	1838	32	-10.9697	1000	-10	-0.00519617	0.990644	-0.266823	0.315227
15424408	15424908	AT5G38530	Chr5	15424037	15426470	NA	NA	Yes	8.54939	15.8659	15421452	15421952	AT5G38520	NA	NA	Yes	0.360891	0.338902	Chr5	15421572	15423431	+	934	+	684	interaction176840	2956	30	0.070444	0	12	0.070444	1200	-21.0107	948	542	-10.9655	1800	-28	-0.335162	0.0973969	-0.196798	0.177047
17198988	17199488	AT5G42900	Chr5	17197640	17199793	NA	Yes	Yes	0.173005	0.244123	17197048	17197548	AT5G42895	NA	NA	NA	0.11155	0.148946	Chr5	17196794	17197163	+	1545	+	28	interaction181105	1940	10	0.070444	0.007837	2	0.070444	200	-1.3325	1555	9	-10.9597	800	-6	0.500696	0.680152	NA	NA
23000978	23001478	AT1G62262	Chr1	23000156	23002093	Yes	NA	Yes	0.211886	0.227788	22998547	22999047	AT1G62260	NA	NA	Yes	0.280565	0.344684	Chr1	22997825	22999796	+	390	+	762	interaction40285	2431	16	0.070444	0	4	0.070444	400	-3.97131	440	782	-10.954	1200	-12	0.270577	0.899001	-0.260664	0.687618
19118988	19119488	AT1G51550	Chr1	19117031	19119371	NA	NA	NA	4.51008	1.79052	19113927	19114427	AT1G51538	NA	NA	Yes	0.564895	0.88352	Chr1	19113182	19115273	+	57	+	930	interaction30085	5061	11	0.070444	0.001526	2	0.070444	200	-1.331	34	1151	-10.9517	900	-6	0.0959684	0.810144	-0.50161	0.810836
11545988	11546488	AT1G32100	Chr1	11546337	11547994	NA	Yes	Yes	5.68012	11.1666	11539469	11539969	AT1G32080	NA	NA	NA	0.207443	0.266754	Chr1	11537341	11539800	+	179	+	1752	interaction22804	6519	23	0.070444	0	8	0.070444	800	-11.6245	160	1649	-10.945	1500	-20	-0.225042	0.615802	-0.20474	0.165851
5133982	5134482	AT3G15240	Chr3	5133605	5135902	NA	Yes	Yes	7.5603	1.97231	5130956	5131456	AT3G15220	NA	NA	NA	0.138521	0.223861	Chr3	5126596	5132306	+	1927	+	48	interaction97117	3026	15	0.070444	0	4	0.070444	400	-4.05072	1941	39	-10.944	1100	-12	-0.145385	0.782619	-0.0515009	0.886561
4338007	4338507	AT5G13500	Chr5	4338154	4341003	NA	NA	NA	1.44364	1.43315	4337003	4337503	AT5G13490	NA	NA	NA	0.160317	0.293163	Chr5	4335466	4337680	+	1846	+	148	interaction164351	1004	55	0.070444	0	32	0.070444	3200	-86.3932	1598	132	-10.9417	2300	-70	0.0721698	0.804189	-0.0387506	0.918224
19267936	19268436	AT3G51920	Chr3	19268042	19269479	NA	NA	Yes	0.136802	0.179472	19265399	19265899	AT3G51910	NA	NA	Yes	0.127921	0.186933	Chr3	19265293	19266619	+	330	+	1540	interaction117425	2537	23	0.070444	0	8	0.070444	800	-11.6237	161	1459	-10.9407	1500	-20	0.277786	0.0920938	0.740055	0.00194321
14691402	14691902	AT2G34825	Chr2	14691410	14691629	Yes	NA	Yes	1.27088	1.85166	14690015	14690515	AT2G34820	Yes	NA	Yes	10.8745	5.94118	Chr2	14689623	14690879	+	669	+	723	interaction78099	1387	16	0.070444	0	4	0.070444	400	-3.96984	549	867	-10.9277	1200	-12	-3.54615	NA	NA	NA
11758527	11759027	AT1G32520	Chr1	11758210	11759280	NA	NA	NA	0.616981	0.255573	11757052	11757552	AT1G32510	Yes	NA	Yes	2.19355	0.888589	Chr1	11756999	11758118	+	36	+	519	interaction23153	1475	8	0.070444	1	1	0.070444	100	-0.435809	13	554	-10.9237	700	-4	-0.068474	0.830587	-0.966146	0.611315
23836421	23836921	AT1G64235	Chr1	23836248	23836620	NA	NA	Yes	0.159119	0.226939	23834971	23835471	AT1G64230	NA	NA	Yes	0.365821	0.343707	Chr1	23833550	23835536	+	1046	+	215	interaction42295	1450	41	0.070444	0	20	0.070444	2000	-44.1202	1186	213	-10.9025	2100	-46	-0.214409	NA	0.316664	0.0611273
23390086	23390586	AT1G63080	Chr1	23387630	23390816	NA	NA	Yes	0.291506	0.337383	23386582	23387082	AT1G63070	Yes	NA	Yes	5.79921	5.06207	Chr1	23385323	23387167	+	1039	+	662	interaction41171	3504	16	0.070444	0	4	0.070444	400	-3.96785	1036	827	-10.8922	1200	-12	0.0526014	0.941579	1.21356	NA
4341056	4341556	AT5G13510	Chr5	4341261	4342095	NA	NA	NA	1.44364	1.43315	4338002	4338502	AT5G13500	NA	NA	NA	0.134064	0.212004	Chr5	4338154	4341003	+	88	+	1846	interaction164385	3054	19	0.070444	0	6	0.070444	600	-7.57889	71	1598	-10.8907	1300	-16	-0.135907	0.554243	0.0721698	0.804189
624402	624902	AT1G02820	Chr1	623764	624475	NA	NA	Yes	0.168603	0.226443	621957	622457	AT1G02816	NA	Yes	Yes	0.237259	0.487929	Chr1	621460	622469	+	1043	+	1013	interaction1501	2445	64	0.070444	0	36	0.070444	3600	-97.3844	1017	873	-10.8855	2800	-80	-0.0576296	0.844569	0.204131	0.364167
1837448	1837948	AT1G06070	Chr1	1834828	1837648	NA	NA	Yes	0.186661	0.275446	1829011	1829511	AT1G06040	NA	NA	NA	0.177297	0.307202	Chr1	1828412	1829890	+	137	+	1902	interaction4178	8437	21	0.070444	0	7	0.070444	700	-9.54393	105	1771	-10.8824	1400	-18	-0.0130052	0.97489	0.0560821	0.866211
21129577	21130077	AT5G52030	Chr5	21128128	21130090	NA	NA	NA	0.19003	0.26199	21124520	21125020	AT5G52020	NA	NA	Yes	2.86641	3.97081	Chr5	21123957	21124948	+	84	+	1872	interaction188319	5057	24	0.070444	0	9	0.070444	900	-14.0334	88	1864	-10.8814	1500	-22	-0.101836	0.750427	0.226823	0.851048
4962981	4963481	AT3G14780	Chr3	4961805	4963544	NA	NA	Yes	5.99798	0.787431	4958965	4959465	AT3G14770	NA	NA	Yes	0.186084	0.228342	Chr3	4957333	4959704	+	135	+	1941	interaction96995	4016	41	0.070444	0	21	0.070444	2100	-48.1084	115	1883	-10.8813	2000	-46	0.136115	0.797513	0.119697	0.743004
4377489	4377989	AT3G13440	Chr3	4377096	4379575	NA	NA	Yes	0.201465	0.315962	4376589	4377089	AT3G13437	NA	NA	Yes	1.62864	2.11299	Chr3	4376360	4376959	+	678	+	1099	interaction96353	900	36	0.070444	0	16	0.070444	1600	-31.8157	522	888	-10.8785	2000	-38	0.075488	0.827956	0.600082	0.241683
19156993	19157493	AT1G51670	Chr1	19156503	19158749	NA	NA	Yes	1.10607	1.01803	19154137	19154637	AT1G51660	NA	NA	Yes	0.170005	0.296807	Chr1	19154322	19155947	+	531	+	886	interaction30194	2856	25	0.070444	0	9	0.070444	900	-13.7621	443	727	-10.8692	1600	-22	0.198102	0.894433	-0.0677086	0.864036
12358633	12359133	AT2G28800	Chr2	12356363	12359252	NA	NA	Yes	0.123222	0.21109	12354907	12355407	AT2G28790	NA	Yes	Yes	10.3523	23.7479	Chr2	12354429	12355431	+	1487	+	49	interaction71661	3726	11	0.070444	0.001315	2	0.070444	200	-1.33098	1287	37	-10.8612	900	-6	-0.0412293	0.882442	-0.106704	0.73646
2084144	2084644	AT3G66652	Chr3	2083393	2087556	NA	NA	NA	0.13379	0.217157	2082543	2083043	AT3G06650	NA	NA	NA	0.120426	0.205005	Chr3	2079032	2083291	+	925	+	1263	interaction92193	1601	30	0.070444	0	12	0.070444	1200	-20.9713	875	959	-10.8612	1800	-28	-0.105595	0.826953	-0.124171	0.517271
1290837	1291337	AT5G04520	Chr5	1290011	1291063	NA	NA	NA	0.183615	0.252954	1287066	1287566	AT5G04510	NA	NA	NA	0.14731	0.252856	Chr5	1286865	1289908	+	111	+	1168	interaction157953	3771	19	0.070444	0	6	0.070444	600	-7.57462	73	1171	-10.8553	1300	-16	0.0717835	0.877533	-0.284955	0.117331
8858565	8859065	AT2G20580	Chr2	8858987	8864865	NA	Yes	NA	0.300815	0.383209	8856556	8857056	AT2G20570	NA	Yes	Yes	4.0009	6.10752	Chr2	8855357	8857756	+	1160	+	852	interaction65777	2009	30	0.070444	0	12	0.070444	1200	-20.9682	1023	919	-10.8532	1800	-28	-0.319364	0.0207915	-0.655732	0.00010248
9845491	9845991	AT2G23140	Chr2	9845485	9849264	NA	Yes	NA	5.39391	1.15072	9844512	9845012	AT2G23130	NA	Yes	Yes	1.85894	3.5729	Chr2	9844298	9845385	+	31	+	1253	interaction67437	979	12	0.070444	4.1e-05	3	0.070444	300	-2.60674	15	1161	-10.8497	900	-8	0.110875	0.691653	1.09667	2.16e-06
17110595	17111095	AT2G41997	Chr2	17110827	17111207	Yes	NA	Yes	3.58675	6.69146	17109357	17109857	AT2G40995	Yes	NA	Yes	5.49688	2.0252	Chr2	17109393	17109712	+	635	+	864	interaction82814	1238	25	0.070444	0	9	0.070444	900	-13.7538	508	699	-10.8359	1600	-22	NA	NA	NA	NA
23888949	23889449	AT1G64370	Chr1	23888919	23889661	Yes	NA	Yes	5.58756	7.48564	23888046	23888546	AT1G64360	Yes	NA	Yes	1.44296	0.700265	Chr1	23887869	23888533	+	916	+	71	interaction42497	903	11	0.070444	0.001806	2	0.070444	200	-1.33098	887	38	-10.8347	900	-6	-0.189922	0.224513	0.177842	0.714844
7043678	7044178	AT1G20350	Chr1	7043712	7044592	NA	Yes	Yes	1.88131	3.16467	7042918	7043418	AT1G20340	NA	Yes	Yes	0.381559	0.682155	Chr1	7042428	7043363	+	710	+	1588	interaction13427	760	25	0.070444	0	9	0.070444	900	-13.753	515	1345	-10.8329	1600	-22	1.55797	0.000371021	-0.00428941	0.991755
115901	116401	AT3G01327	Chr3	116230	116548	Yes	NA	Yes	4.41113	6.31881	114989	115489	AT3G01326	Yes	NA	Yes	4.54089	2.27591	Chr3	115319	115756	+	1090	+	1005	interaction88645	912	29	0.070444	0	12	0.071811	1177.14	-20.9581	1364	1102	-10.8268	1722.86	-28	-0.214409	NA	NA	NA
25902967	25903467	AT5G64790	Chr5	25902640	25904701	Yes	NA	Yes	2.88296	2.43529	25896546	25897046	AT5G64760	NA	Yes	Yes	0.137041	0.222967	Chr5	25893779	25896582	+	1443	+	133	interaction196924	6421	19	0.070444	0	6	0.070444	600	-7.57058	1389	75	-10.8221	1300	-16	-1.25269	NA	-0.137055	0.661471
2956522	2957022	AT5G09510	Chr5	2955112	2956673	NA	NA	Yes	12.5155	9.39957	2949101	2949601	AT5G09470	NA	Yes	Yes	9.59778	15.959	Chr5	2949240	2950513	+	1998	+	185	interaction161490	7421	23	0.070444	0	8	0.070444	800	-11.5991	1841	196	-10.8199	1500	-20	-0.0071301	0.982943	-0.0685361	NA
9660950	9661450	AT3G26380	Chr3	9660064	9663298	NA	Yes	NA	1.03137	1.14035	9656956	9657456	AT3G26370	NA	NA	NA	0.162773	0.25572	Chr3	9656743	9659935	+	1539	+	129	interaction106821	3994	27	0.070444	0	11	0.070444	1100	-18.9215	2034	94	-10.8054	1600	-26	-0.095562	0.725628	-0.0926558	0.703963
25709542	25710042	AT1G68520	Chr1	25709113	25710907	NA	Yes	Yes	1.42688	1.37437	25706909	25707409	AT1G68510	NA	Yes	Yes	8.96571	16.1747	Chr1	25706881	25708255	+	654	+	680	interaction48326	2633	25	0.070444	0	9	0.070444	900	-13.7429	629	632	-10.7927	1600	-22	0.00224473	0.994875	NA	NA
22246920	22247420	AT5G54770	Chr5	22246591	22248332	NA	Yes	Yes	0.173817	0.309926	22245524	22246024	AT5G54760	NA	NA	NA	0.144926	0.241238	Chr5	22243799	22245770	+	1870	+	142	interaction190956	1396	38	0.070444	0	19	0.070444	1900	-41.9039	2094	102	-10.7903	1900	-42	-0.0365375	0.878778	0.0448276	0.863456
25228525	25229025	AT5G62840	Chr5	25228224	25229683	NA	NA	Yes	0.167143	0.269443	25225016	25225516	AT5G62820	NA	NA	Yes	0.559066	0.596984	Chr5	25223726	25225021	+	108	+	1899	interaction195959	3509	11	0.070444	0.002223	2	0.070444	200	-1.33097	40	1720	-10.7862	900	-6	-0.153937	0.621901	-0.14611	0.773736
8047966	8048466	AT3G22770	Chr3	8047683	8048667	Yes	NA	Yes	0.385874	0.450144	8046964	8047464	AT3G22760	Yes	NA	Yes	0.750687	0.312871	Chr3	8044454	8047530	+	539	+	214	interaction103196	1002	23	0.070444	0	8	0.070444	800	-11.5896	536	214	-10.7741	1500	-20	-0.93607	NA	0.0123261	0.980704
12675505	12676005	AT2G29650	Chr2	12673382	12676049	NA	Yes	Yes	1.03729	0.269668	12671042	12671542	AT2G29640	NA	NA	NA	0.153395	0.20852	Chr2	12671205	12673300	+	1796	+	249	interaction72828	4463	42	0.070444	0	21	0.070444	2100	-47.3894	1706	188	-10.7709	2100	-48	-0.235109	0.0769537	0.188966	0.669199
30335909	30336409	AT1G80720	Chr1	30336137	30337565	NA	NA	NA	11.2746	7.98652	30331485	30331985	AT1G80700	NA	NA	NA	0.058248	0.112822	Chr1	30331921	30333400	+	935	+	71	interaction58129	4424	11	0.070444	0.001806	2	0.070444	200	-1.33096	844	41	-10.7639	900	-6	-0.240043	0.645297	0.143737	0.755527
8311632	8312132	AT3G23255	Chr3	8311721	8313125	NA	NA	Yes	6.06083	3.35546	8310007	8310507	AT3G23250	Yes	NA	Yes	7.30483	4.65656	Chr3	8309208	8310826	+	74	+	1142	interaction103805	1625	11	0.070444	0.001855	2	0.070444	200	-1.33096	41	1329	-10.7639	900	-6	-0.0258609	0.965824	0.235486	0.772371
6355900	6356400	AT3G18510	Chr3	6355663	6356153	NA	NA	Yes	2.16617	1.34153	6337985	6338485	AT3G18480	NA	NA	NA	0.266593	0.327092	Chr3	6336735	6341788	+	1932	+	57	interaction98826	17915	17	0.070444	0	5	0.070444	500	-5.72482	2008	57	-10.7549	1200	-14	0.182916	0.792574	-0.0811575	0.758305
24614900	24615400	AT1G66130	Chr1	24614961	24616930	NA	Yes	Yes	3.24836	4.39398	24613001	24613501	AT1G66120	NA	Yes	Yes	9.89996	16.8654	Chr1	24612619	24614805	+	960	+	983	interaction45174	1899	36	0.070444	0	16	0.070444	1600	-31.7459	790	1234	-10.7546	2000	-38	0.108593	0.697656	NA	NA
15206941	15207441	AT2G36270	Chr2	15204763	15207528	NA	NA	Yes	1.8942	1.04131	15203841	15204341	AT2G36261	NA	NA	NA	1.09589	0.776777	Chr2	15203903	15204146	+	52	+	821	interaction79465	3100	11	0.070444	0.001399	2	0.070444	200	-1.33096	42	1135	-10.7429	900	-6	1.52849	1.28e-05	NA	NA
1637060	1637560	AT1G05530	Chr1	1636495	1637863	NA	NA	Yes	0.768102	1.24199	1634565	1635065	AT1G05520	NA	Yes	Yes	0.199131	0.348362	Chr1	1630899	1635711	+	1228	+	1048	interaction3431	2495	38	0.070444	0	19	0.074564	1795.01	-40.4145	1272	1227	-10.7394	2004.99	-40	-0.137941	0.901855	-0.150112	0.49992
13192885	13193385	AT4G25990	Chr4	13191689	13193543	NA	NA	Yes	2.09352	2.74004	13190456	13190956	AT4G25980	NA	NA	Yes	0.352189	0.303349	Chr4	13189392	13191507	+	205	+	1905	interaction146570	2429	19	0.070444	0	6	0.070444	600	-7.55971	81	1603	-10.7337	1300	-16	0.226703	0.725628	0.32197	0.796338
8017446	8017946	AT1G22660	Chr1	8017396	8021712	NA	NA	NA	0.131144	0.226949	8015030	8015530	AT1G22650	NA	NA	Yes	0.725458	0.770657	Chr1	8013381	8015991	+	80	+	1427	interaction15742	2416	22	0.070444	0	8	0.070444	800	-11.8178	68	1448	-10.7244	1400	-20	0.0397453	0.933283	0.326743	0.113314
12242510	12243010	AT4G23450	Chr4	12240802	12242706	NA	NA	Yes	1.7386	1.47608	12237626	12238126	AT4G23440	NA	NA	Yes	0.177271	0.221452	Chr4	12237764	12240826	+	2016	+	121	interaction144444	4884	27	0.070444	0	11	0.070444	1100	-18.8948	1595	99	-10.7214	1600	-26	0.386979	0.399378	0.0640085	0.861962
25712954	25713454	AT1G68530	Chr1	25712587	25714807	NA	NA	Yes	0.779418	0.639359	25712028	25712528	AT1G68526	NA	NA	NA	0.794234	0.655919	Chr1	25711868	25712238	+	331	+	1003	interaction48415	926	31	0.070444	0	13	0.070444	1300	-23.713	288	887	-10.7047	1800	-30	0.123939	0.585457	0.297557	NA
247544	248044	AT3G01670	Chr3	247233	250470	NA	NA	Yes	0.138481	0.243624	246455	246955	AT3G01660	NA	NA	Yes	0.224004	0.350035	Chr3	245477	246508	+	1300	+	408	interaction89220	1089	26	0.070444	0	10	0.070444	1000	-16.2302	1604	169	-10.673	1600	-24	-0.672386	0.00218436	-0.170754	0.629218
28449917	28450417	AT1G75770	Chr1	28449989	28451108	NA	NA	NA	0.13943	0.19738	28439524	28440024	AT1G75730	NA	NA	Yes	0.696468	0.980466	Chr1	28435705	28439769	+	57	+	1376	interaction54744	10393	11	0.070444	0.001526	2	0.070444	200	-1.33095	46	1053	-10.6688	900	-6	0.618467	0.0236023	0.441515	0.015212
13938057	13938557	AT5G35770	Chr5	13936085	13940867	NA	NA	Yes	0.255867	0.44041	13934468	13934968	AT5G35760	Yes	NA	Yes	4.27556	1.04775	Chr5	13934107	13934782	+	43	+	948	interaction174922	3589	8	0.070444	1	1	0.070444	100	-0.438915	15	976	-10.6659	700	-4	0.0183631	0.993246	0.657687	0.6385
15611993	15612493	AT5G39000	Chr5	15611859	15614481	Yes	NA	Yes	0.137618	0.220938	15610968	15611468	AT5G38990	Yes	NA	Yes	1.85893	1.75767	Chr5	15608813	15611598	+	1925	+	385	interaction177483	1025	48	0.070444	0	25	0.070444	2500	-59.8706	1969	314	-10.6563	2300	-56	0.17695	0.901167	0.00492248	0.991776
3238131	3238631	AT1G09940	Chr1	3236994	3239554	NA	NA	Yes	0.257473	0.371854	3232533	3233033	AT1G09932	NA	NA	Yes	5.79485	4.18671	Chr1	3230449	3233109	+	44	+	1668	interaction6039	5598	11	0.070444	0.00116	2	0.070444	200	-1.33095	47	1707	-10.6525	900	-6	0.283937	0.170327	-0.0743339	0.879712
14753997	14754497	AT2G35010	Chr2	14754270	14756323	NA	NA	NA	0.208399	0.263147	14751983	14752483	AT2G35000	NA	Yes	Yes	3.84056	6.72748	Chr2	14751573	14753319	+	194	+	1819	interaction78288	2014	44	0.070444	0	23	0.070444	2300	-54.198	150	1356	-10.6396	2100	-50	0.00808185	0.984426	0.243343	0.456209
16342466	16342966	AT3G44798	Chr3	16342294	16343014	NA	NA	NA	0.114003	0.208833	16329055	16329555	AT3G44790	NA	NA	Yes	1.86368	0.807503	Chr3	16328791	16330265	+	167	+	1106	interaction110893	13411	21	0.070444	0	7	0.070444	700	-9.50245	144	1192	-10.6299	1400	-18	0.0595167	0.986957	0.996217	0.622377
21009979	21010479	AT5G51720	Chr5	21009591	21010345	NA	Yes	Yes	0.152281	0.244097	21008349	21008849	AT5G51710	NA	Yes	NA	0.145225	0.218315	Chr5	21004277	21008718	+	542	+	771	interaction187807	1630	28	0.070444	0	11	0.070444	1100	-18.5215	434	539	-10.6262	1700	-26	0.632809	0.00571824	0.0473594	0.908463
19590600	19591100	AT3G52850	Chr3	19587820	19591947	NA	NA	NA	0.585342	0.299	19581479	19581979	AT3G52840	NA	NA	NA	0.264707	0.21918	Chr3	19581112	19586299	+	46	+	1414	interaction117989	9121	11	0.070444	0.001224	2	0.070444	200	-1.33094	49	1171	-10.622	900	-6	-0.0170915	0.95515	0.247132	0.185254
7053463	7053963	AT4G11680	Chr4	7053442	7055622	NA	NA	NA	3.31606	2.98764	7052508	7053008	AT4G11670	NA	NA	NA	0.132009	0.215464	Chr4	7044243	7053091	+	126	+	1236	interaction132170	955	38	0.070444	0	19	0.070444	1900	-41.7929	109	1246	-10.6178	1900	-42	-0.310507	0.120572	-0.0335961	0.936004
1530498	1530998	AT1G05260	Chr1	1529766	1531439	NA	NA	Yes	3.05271	2.7664	1522627	1523127	AT1G05240	NA	NA	NA	0.0610428	0.0799789	Chr1	1521136	1522681	+	1448	+	44	interaction3043	7871	11	0.070444	0.00116	2	0.070444	200	-1.33094	1506	50	-10.6078	900	-6	-0.0507276	0.874557	1.21356	NA
10481595	10482095	AT5G28510	Chr5	10481040	10484022	Yes	NA	Yes	0.10264	0.198429	10478362	10478862	AT5G28500	NA	NA	Yes	0.621537	0.528172	Chr5	10477770	10479384	+	45	+	1153	interaction174709	3233	11	0.070444	0.001192	2	0.070444	200	-1.33094	50	1277	-10.6078	900	-6	1.88498	0.20605	-0.135582	0.449401
17513038	17513538	AT2G41950	Chr2	17513078	17514167	NA	NA	NA	0.226259	0.24987	17501958	17502458	AT2G41930	NA	NA	Yes	3.04688	4.19927	Chr2	17501628	17502684	+	407	+	1758	interaction84137	11080	34	0.070444	0	15	0.070444	1500	-29.0966	355	1985	-10.5988	1900	-34	-0.430703	0.0300068	-0.67821	NA
11714504	11715004	AT4G22115	Chr4	11714742	11715167	Yes	NA	Yes	0.170814	0.27194	11712571	11713071	AT4G22110	Yes	NA	Yes	5.43422	1.9568	Chr4	11711313	11714228	+	643	+	376	interaction142382	1933	23	0.070444	0	8	0.070444	800	-11.5517	628	340	-10.5944	1500	-20	1.61886	NA	0.575796	0.332936
13221478	13221978	AT4G26080	Chr4	13219960	13222284	NA	NA	NA	0.200204	0.217295	13218549	13219049	AT4G26070	NA	NA	Yes	0.116617	0.233034	Chr4	13217648	13219933	+	145	+	1156	interaction146704	2929	39	0.070444	0	20	0.070444	2000	-45.1376	100	1368	-10.5906	1900	-44	-0.396478	0.0262668	-0.0550515	0.921202
8762961	8763461	AT4G15350	Chr4	8762952	8764594	Yes	NA	Yes	10.7822	2.57077	8760550	8761050	AT4G15340	Yes	NA	Yes	8.23655	3.85095	Chr4	8754479	8760589	+	1484	+	1113	interaction135805	2411	39	0.085419	0	21	0.09568	1546.1	-46.5233	1979	1012	-10.5879	1670.15	-42	0.497948	0.725628	0.45226	0.034467
5774962	5775462	AT3G16910	Chr3	5773054	5775501	NA	Yes	NA	3.57376	0.698349	5770438	5770938	AT3G16895	NA	NA	NA	0.261329	0.234336	Chr3	5770867	5771544	+	1791	+	77	interaction98133	4524	20	0.070444	0	7	0.070444	700	-9.69959	1481	53	-10.578	1300	-18	-0.0943959	0.710239	-1.55316	NA
15202956	15203456	AT2G36260	Chr2	15202645	15203703	Yes	NA	Yes	0.423089	0.22389	15201459	15201959	AT2G36255	NA	NA	Yes	2.45845	1.04203	Chr2	15201401	15201728	+	557	+	92	interaction79436	1497	19	0.070444	0	6	0.070444	600	-7.53983	548	95	-10.5759	1300	-16	-2.61046	NA	2.75599	NA
1080502	1081002	AT5G04010	Chr5	1080104	1081074	NA	Yes	Yes	4.36439	2.14206	1078616	1079116	AT5G04000	NA	Yes	Yes	1.13617	0.960115	Chr5	1079036	1079869	+	1378	+	44	interaction157384	1886	13	0.070444	5e-06	3	0.070444	300	-2.55024	1341	42	-10.5745	1000	-8	3.23268	0.0229745	0.743057	0.0745087
343472	343972	AT3G02020	Chr3	340545	343835	NA	Yes	Yes	4.83292	5.74434	337533	338033	AT3G02010	NA	NA	NA	0.176247	0.262911	Chr3	337964	340442	+	1702	+	152	interaction89563	5939	30	0.070444	0	13	0.070444	1300	-24.0656	1975	118	-10.5742	1700	-30	-0.553638	0.449862	-0.0649324	0.947101
4094538	4095038	AT3G12870	Chr3	4094416	4095037	NA	Yes	Yes	2.46058	3.36395	4091965	4092465	AT3G12860	NA	NA	Yes	0.186962	0.236391	Chr3	4091569	4093921	+	980	+	39	interaction95991	2573	10	0.070444	0.012599	2	0.070444	200	-1.33195	1038	11	-10.5713	800	-6	-0.189824	0.672017	-0.309046	0.432264
21079445	21079945	AT3G56950	Chr3	21078296	21079856	NA	NA	NA	11.8613	13.023	21073560	21074060	AT3G56930	NA	NA	NA	0.121251	0.226538	Chr3	21073420	21076314	+	115	+	1184	interaction120727	5885	19	0.070444	0	6	0.070444	600	-7.53864	96	1153	-10.5666	1300	-16	-0.0971525	0.721808	0.165944	0.524503
16272436	16272936	AT5G40630	Chr5	16271139	16272470	Yes	NA	Yes	0.350697	0.55937	16267018	16267518	AT5G40610	NA	NA	Yes	0.214596	0.273319	Chr5	16264860	16267354	+	1161	+	154	interaction179728	5418	24	0.070444	0	9	0.070444	900	-13.9567	1212	113	-10.5629	1500	-22	-0.0508668	0.9599	-0.0783481	0.78545
863618	864118	AT2G02960	Chr2	862086	864447	NA	NA	NA	0.379115	0.51973	856472	856972	AT2G02950	NA	NA	Yes	0.455473	0.671506	Chr2	854946	856538	+	57	+	1450	interaction59284	7146	11	0.070444	0.001526	2	0.070444	200	-1.33093	54	1253	-10.5567	900	-6	0.116924	0.596973	0.573796	0.0283647
18068944	18069444	AT2G43520	Chr2	18068424	18069168	NA	NA	Yes	6.041	6.57023	18067119	18067619	AT2G43510	NA	NA	Yes	3.68925	4.84987	Chr2	18067171	18067802	+	1207	+	443	interaction85362	1825	31	0.070444	0	13	0.070444	1300	-23.6474	1117	398	-10.553	1800	-30	0.653859	0.0611796	0.749543	0.0174866
9464033	9464533	AT5G26900	Chr5	9463751	9465086	NA	NA	Yes	0.130459	0.215151	9458998	9459498	AT5G26880	NA	NA	NA	0.159916	0.224839	Chr5	9457036	9459230	+	910	+	63	interaction173911	5035	13	0.070444	9e-06	3	0.070444	300	-2.54956	1029	43	-10.5468	1000	-8	-1.21834	NA	-0.0403165	0.909904
3717985	3718485	AT5G11570	Chr5	3715942	3718276	NA	NA	Yes	0.546915	0.610733	3713954	3714454	AT5G11560	NA	NA	Yes	0.24414	0.297952	Chr5	3709480	3714059	+	871	+	872	interaction163377	4031	28	0.070444	0	11	0.070444	1100	-18.4899	777	618	-10.5352	1700	-26	0.382101	0.673451	-0.232154	0.0977368
612988	613488	AT3G02820	Chr3	611523	613448	NA	NA	Yes	4.59363	8.83044	605169	605669	AT3G02790	NA	NA	Yes	0.143719	0.330483	Chr3	604844	605421	+	86	+	1540	interaction90144	7819	11	0.070444	0.002017	2	0.070444	200	-1.33093	56	1591	-10.5341	900	-6	-0.209457	0.658499	0.0137544	0.975091
2446501	2447001	AT4G04830	Chr4	2445793	2447086	NA	NA	Yes	5.47765	5.80243	2442078	2442578	AT4G04810	NA	NA	Yes	0.928219	0.321828	Chr4	2441326	2442567	+	1436	+	115	interaction128655	4423	24	0.070444	0	9	0.070444	900	-13.9476	1299	117	-10.5262	1500	-22	0.349767	0.062901	-0.0544386	0.921891
13945906	13946406	AT2G32870	Chr2	13944610	13946790	Yes	NA	Yes	0.228853	0.27171	13942579	13943079	AT2G32860	Yes	NA	Yes	6.52689	2.54273	Chr2	13940186	13943804	+	570	+	73	interaction76520	3327	11	0.070444	0.001839	2	0.070444	200	-1.33093	631	59	-10.5034	900	-6	-0.139569	0.671348	-0.463796	0.0685015
10546910	10547410	AT1G30070	Chr1	10546590	10548151	NA	NA	Yes	0.254453	0.333208	10544950	10545450	AT1G30060	NA	NA	NA	0.318965	0.341565	Chr1	10545086	10545906	+	533	+	226	interaction20648	1960	21	0.070444	0	7	0.070444	700	-9.47893	565	183	-10.4921	1400	-18	-0.0589476	0.893036	NA	NA
1024465	1024965	AT5G03840	Chr5	1024640	1025812	Yes	NA	Yes	0.16704	0.278	1019071	1019571	AT5G03830	NA	Yes	Yes	0.535441	0.501811	Chr5	1018337	1020460	+	85	+	1926	interaction157333	5394	26	0.070444	0	11	0.070444	1100	-19.1755	64	1869	-10.4853	1500	-26	0.953094	0.476671	0.0106422	0.984654
17388399	17388899	AT3G47220	Chr3	17387975	17390762	NA	NA	Yes	0.134118	0.207496	17385041	17385541	AT3G47210	NA	NA	Yes	8.0115	7.86277	Chr3	17385312	17387244	+	1450	+	42	interaction113277	3358	8	0.070444	1	1	0.070444	100	-0.441278	1737	17	-10.4833	700	-4	0.500433	0.404878	0.241967	0.612236
22217104	22217604	AT3G60140	Chr3	22216671	22220824	Yes	NA	Yes	5.5152	2.63819	22210981	22211481	AT3G60130	NA	NA	NA	0.126514	0.151462	Chr3	22210245	22213840	+	1397	+	82	interaction123246	6123	11	0.070444	0.001968	2	0.070444	200	-1.33092	1383	62	-10.4758	900	-6	1.6815	0.117282	0.608263	0.00247057
16865922	16866422	AT5G42210	Chr5	16866039	16870887	Yes	NA	Yes	7.04404	4.22166	16847568	16848068	AT5G42150	NA	NA	NA	0.183537	0.252342	Chr5	16846149	16848279	+	1268	+	61	interaction180761	18354	11	0.070444	0.001617	2	0.070444	200	-1.33092	1412	62	-10.4758	900	-6	-0.220974	0.665374	-0.0590471	0.880851
10895461	10895961	AT1G30710	Chr1	10895279	10897109	NA	NA	Yes	6.85668	5.43973	10892924	10893424	AT1G30700	NA	NA	Yes	4.50309	5.32665	Chr1	10892569	10894572	+	985	+	582	interaction21415	2537	31	0.070444	0	13	0.070444	1300	-23.6126	1028	500	-10.4742	1800	-30	NA	NA	0.463839	0.125874
13723992	13724492	AT2G32310	Chr2	13724393	13726374	NA	NA	Yes	0.176479	0.213178	13722991	13723491	AT2G32300	NA	NA	Yes	0.268593	0.302606	Chr2	13722426	13723590	+	339	+	1170	interaction75531	1001	35	0.070444	0	16	0.070444	1600	-32.0736	234	1453	-10.4704	1900	-36	-0.702378	NA	0.0106778	0.979047
7191576	7192076	AT3G20590	Chr3	7191685	7192453	NA	NA	Yes	4.69305	1.36456	7188991	7189491	AT3G20580	NA	NA	Yes	4.26086	5.18715	Chr3	7187855	7190562	+	1779	+	145	interaction100338	2585	45	0.070444	0	24	0.070444	2400	-57.5899	1923	146	-10.4686	2100	-54	0.738462	0.502328	0.509668	NA
5339949	5340449	AT1G15530	Chr1	5339960	5341931	NA	Yes	NA	0.206002	0.33279	5337542	5338042	AT1G15520	NA	NA	Yes	0.199781	0.328555	Chr1	5331857	5338326	+	65	+	905	interaction10801	2407	11	0.070444	0.001698	2	0.070444	200	-1.33092	63	1123	-10.4673	900	-6	0.244828	0.368213	-1.24627	0.38152
12529537	12530037	AT4G24140	Chr4	12529874	12533842	NA	NA	Yes	0.178621	0.276987	12527871	12528371	AT4G24130	NA	NA	Yes	4.76273	4.0547	Chr4	12527752	12528593	+	53	+	911	interaction145245	1666	11	0.070444	0.001426	2	0.070444	200	-1.33092	64	808	-10.459	900	-6	0.0100537	0.979961	0.202206	0.245396
10678934	10679434	AT2G25100	Chr2	10679523	10681998	NA	NA	NA	0.647452	0.605197	10676474	10676974	AT2G25095	NA	NA	Yes	11.4529	14.0433	Chr2	10676471	10676553	+	77	+	524	interaction68733	2460	15	0.070444	0	4	0.070444	400	-4.02462	55	478	-10.4529	1100	-10	-0.133139	0.680152	NA	NA
7857503	7858003	AT2G18080	Chr2	7857197	7859715	Yes	NA	Yes	0.231504	0.277523	7852508	7853008	AT2G18070	Yes	NA	Yes	13.5036	6.64274	Chr2	7852528	7853666	+	1209	+	723	interaction63606	4995	23	0.070444	0	8	0.070444	800	-11.5209	1292	658	-10.4527	1500	-20	NA	NA	NA	NA
9646495	9646995	AT3G26330	Chr3	9646804	9648584	NA	NA	Yes	0.465444	0.343329	9642435	9642935	AT3G26310	NA	NA	Yes	1.70578	1.40965	Chr3	9641088	9642779	+	635	+	940	interaction106748	4060	23	0.070444	0	8	0.070444	800	-11.5195	689	846	-10.446	1500	-20	0.560765	0.00112718	-0.0749223	0.838557
2059926	2060426	AT5G06685	Chr5	2060152	2060234	NA	NA	NA	1.96164	0.978585	2057078	2057578	AT5G06680	NA	NA	NA	0.142856	0.2199	Chr5	2056586	2059787	+	83	+	1718	interaction159676	2848	20	0.070444	0	7	0.070444	700	-9.677	57	1842	-10.4364	1300	-16	NA	NA	-0.141712	0.622849
18081623	18082123	AT2G43590	Chr2	18081330	18082767	NA	Yes	Yes	10.4982	11.9242	18079455	18079955	AT2G43580	NA	NA	Yes	5.01705	3.85608	Chr2	18078648	18080028	+	952	+	41	interaction85472	2168	12	0.070444	7.4e-05	3	0.070444	300	-2.5958	883	17	-10.4308	900	-8	-0.984811	1.3e-09	1.06155	NA
20105606	20106106	AT1G53850	Chr1	20103952	20106015	NA	NA	NA	0.165735	0.335833	20092056	20092556	AT1G53820	Yes	NA	Yes	6.92216	3.6696	Chr1	20091490	20092423	+	81	+	987	interaction33035	13550	11	0.070444	0.001955	2	0.070444	200	-1.33092	68	1145	-10.4286	900	-6	0.113878	0.641244	1.61886	NA
6367523	6368023	AT3G18524	Chr3	6368009	6372568	NA	NA	NA	5.14056	1.80683	6355868	6356368	AT3G18510	NA	NA	Yes	0.437411	0.516458	Chr3	6355663	6356153	+	62	+	1932	interaction98883	11655	11	0.070444	0.001638	2	0.070444	200	-1.33092	68	2008	-10.4286	900	-6	-0.191919	0.561703	0.182916	0.792574
6384074	6384574	AT3G18550	Chr3	6383507	6385663	NA	NA	Yes	0.356591	0.346681	6376527	6377027	AT3G18535	NA	NA	Yes	0.231607	0.327804	Chr3	6375676	6377220	+	602	+	86	interaction98904	7547	11	0.070444	0.002017	2	0.070444	200	-1.33092	548	68	-10.4286	900	-6	3.16624	1.46e-10	0.33525	0.190723
23648454	23648954	AT5G58510	Chr5	23648152	23654552	NA	NA	NA	2.5969	0.868824	23646044	23646544	AT5G58500	NA	Yes	Yes	6.73316	13.8215	Chr5	23645534	23646083	+	70	+	1011	interaction193250	2410	11	0.070444	0.001789	2	0.070444	200	-1.33092	68	1079	-10.4286	900	-6	-0.0777131	0.807184	-0.217421	0.712499
2261544	2262044	AT1G07360	Chr1	2260388	2262865	NA	NA	NA	0.126931	0.226819	2259044	2259544	AT1G07350	NA	NA	NA	0.134372	0.200964	Chr1	2257424	2260101	+	89	+	857	interaction4689	2500	11	0.070444	0.002051	2	0.070444	200	-1.33092	69	809	-10.4216	900	-6	-0.123449	0.589897	-0.463458	0.0108429
13831035	13831535	AT4G27720	Chr4	13831037	13833814	NA	NA	NA	12.0373	12.5654	13828622	13829122	AT4G27710	NA	NA	NA	0.127889	0.213498	Chr4	13828431	13830596	+	263	+	1868	interaction147892	2413	32	0.070444	0	14	0.070444	1400	-26.4809	224	1633	-10.4145	1800	-32	-0.137098	0.583963	0.109101	0.694754
7783023	7783523	AT3G22090	Chr3	7782911	7783561	NA	NA	Yes	6.71461	3.23543	7780089	7780589	AT3G22080	Yes	NA	Yes	8.92878	6.90828	Chr3	7777817	7781718	+	1229	+	76	interaction102501	2934	17	0.070444	0	5	0.070444	500	-5.69424	1313	77	-10.4119	1200	-14	-0.986474	0.488824	NA	NA
14432442	14432942	AT4G29290	Chr4	14432740	14433084	NA	NA	Yes	15.0936	7.82654	14431101	14431601	AT4G29285	NA	NA	Yes	1.93363	0.807473	Chr4	14431525	14432290	+	1236	+	129	interaction148985	1341	19	0.070444	0	6	0.070444	600	-7.51841	940	117	-10.4113	1300	-16	NA	NA	NA	NA
6557467	6557967	AT3G19010	Chr3	6556196	6558009	NA	NA	NA	7.89871	8.73715	6555498	6555998	AT3G19002	NA	NA	Yes	0.864214	1.5349	Chr3	6554530	6555657	+	123	+	1072	interaction99601	1969	25	0.070444	0	10	0.070444	1000	-16.4697	83	985	-10.4108	1500	-24	0.588843	0.000193816	-0.497898	0.675999
14546957	14547457	AT4G29710	Chr4	14547000	14547402	NA	NA	Yes	3.52111	1.99729	14541559	14542059	AT4G29690	NA	NA	Yes	1.24972	1.67453	Chr4	14540906	14542481	+	913	+	83	interaction149045	5398	17	0.070444	0	5	0.070444	500	-5.69313	827	78	-10.4	1200	-14	0.90189	0.713232	0.330495	0.351035
16155575	16156075	AT5G40382	Chr5	16155085	16155683	Yes	NA	Yes	0.307938	0.415873	16148980	16149480	AT5G40370	NA	NA	Yes	0.588772	0.294887	Chr5	16147593	16149198	+	1361	+	102	interaction179518	6595	17	0.070444	0	5	0.070444	500	-5.69313	1546	78	-10.4	1200	-14	1.81085	0.214028	0.47465	0.0259869
14199948	14200448	AT2G33530	Chr2	14197645	14200560	NA	NA	Yes	8.02849	3.39894	14190045	14190545	AT2G33500	NA	NA	Yes	0.181105	0.257789	Chr2	14187986	14190254	+	1803	+	178	interaction77042	9903	27	0.070444	0	11	0.070444	1100	-18.7886	1781	126	-10.3998	1600	-26	-0.296687	0.194441	-0.0655563	0.894011
6430427	6430927	AT3G18690	Chr3	6429533	6430514	NA	NA	NA	0.15802	0.229826	6426391	6426891	AT3G18670	NA	NA	Yes	2.6316	3.02266	Chr3	6424134	6426471	+	107	+	1238	interaction99098	4036	11	0.070444	0.002215	2	0.070444	200	-1.33092	73	1262	-10.3956	900	-6	0.436678	0.123814	-0.515728	0.518781
27654545	27655045	AT1G73580	Chr1	27654840	27655518	NA	Yes	Yes	0.867036	0.26599	27650614	27651114	AT1G73570	NA	Yes	NA	0.243812	0.458016	Chr1	27650991	27653942	+	1721	+	970	interaction52848	3931	45	0.086333	0	19	0.075921	1762.92	-40.4558	1718	925	-10.392	1908.84	-50	-0.187587	0.782017	-0.0457398	0.936848
23839503	23840003	AT5G59050	Chr5	23839156	23842677	NA	NA	Yes	0.998086	0.780272	23833981	23834481	AT5G59030	NA	NA	Yes	1.54237	2.20209	Chr5	23833727	23834511	+	92	+	1504	interaction193641	5522	11	0.070444	0.002083	2	0.070444	200	-1.33092	74	1259	-10.3895	900	-6	-0.279781	0.308715	0.0427918	0.932467
24973955	24974455	AT1G66940	Chr1	24973027	24974791	NA	NA	NA	0.286209	0.757562	24971990	24972490	AT1G66930	NA	NA	Yes	0.234136	0.23362	Chr1	24970522	24973069	+	1797	+	228	interaction46948	1965	46	0.070444	0	24	0.070444	2400	-56.7853	1699	252	-10.3884	2200	-54	0.0615692	0.883828	0.529428	0.717171
27555140	27555640	AT1G73280	Chr1	27552969	27555322	Yes	NA	Yes	10.644	14.3405	27551068	27551568	AT1G73270	Yes	NA	Yes	3.73988	2.36478	Chr1	27549020	27552517	+	1162	+	71	interaction52694	4072	17	0.070444	0	5	0.070444	500	-5.69205	1218	79	-10.3883	1200	-14	0.563586	0.0333874	0.627073	0.101779
3841541	3842041	AT1G11410	Chr1	3841285	3844432	NA	NA	NA	0.123649	0.206838	3836522	3837022	AT1G11390	NA	NA	NA	0.14584	0.287469	Chr1	3834458	3837629	+	921	+	76	interaction7061	5019	11	0.070444	0.001886	2	0.070444	200	-1.33091	1299	75	-10.3837	900	-6	-0.00569446	0.988113	-0.0165655	0.968818
14750419	14750919	AT2G34990	Chr2	14750259	14751168	NA	Yes	Yes	3.76987	5.87904	14749009	14749509	AT2G34980	NA	Yes	Yes	0.212858	0.324183	Chr2	14748966	14749878	+	1872	+	238	interaction78240	1410	64	0.070444	0	39	0.070444	3900	-111.695	1568	186	-10.3831	2500	-84	-0.0749929	NA	-0.100706	0.916108
2175447	2175947	AT5G07010	Chr5	2174677	2176106	NA	Yes	Yes	0.220436	0.381247	2172469	2172969	AT5G07000	NA	Yes	Yes	7.33616	13.2537	Chr5	2171402	2172939	+	145	+	1342	interaction160017	2978	38	0.070444	0	19	0.070444	1900	-41.6344	121	1370	-10.3807	1900	-42	0.639631	0.215572	-0.157404	0.583129
8780963	8781463	AT5G25300	Chr5	8780257	8783093	NA	NA	Yes	0.295105	0.418045	8759462	8759962	AT5G25270	NA	NA	NA	0.167143	0.269443	Chr5	8757546	8762757	+	1169	+	62	interaction172498	21501	11	0.070444	0.001638	2	0.070444	200	-1.33091	1266	76	-10.378	900	-6	NA	NA	0.150126	0.393322
17501993	17502493	AT2G41930	Chr2	17501628	17502684	NA	NA	Yes	1.86368	0.807503	17495505	17496005	AT2G41905	NA	NA	NA	0.207986	0.227566	Chr2	17495679	17496142	+	1758	+	157	interaction84068	6488	11	0.070444	0.00249	2	0.070444	200	-1.33091	1985	77	-10.3724	900	-6	-0.67821	NA	0.29746	0.577084
12685413	12685913	AT1G34630	Chr1	12685199	12687641	NA	NA	NA	0.224991	0.283948	12661421	12661921	AT1G34580	NA	NA	Yes	4.41705	4.73488	Chr1	12660550	12663870	+	83	+	1065	interaction24664	23992	11	0.070444	0.001981	2	0.070444	200	-1.33091	79	985	-10.3618	900	-6	0.104751	0.749732	-0.683358	0.0706554
4146470	4146970	AT3G12980	Chr3	4146498	4154895	NA	NA	NA	0.187541	0.352159	4141895	4142395	AT3G12970	NA	Yes	Yes	1.49801	3.19105	Chr3	4141050	4142548	+	151	+	1927	interaction96136	4575	28	0.070444	0	12	0.070444	1200	-21.5341	93	1819	-10.3607	1600	-28	-0.106739	0.748443	-0.245343	0.560804
491598	492098	AT4G01140	Chr4	490748	492199	NA	Yes	Yes	0.125444	0.232262	484076	484576	AT4G01120	NA	NA	NA	0.108389	0.17864	Chr4	481596	484483	+	1485	+	110	interaction125929	7522	11	0.070444	0.002239	2	0.070444	200	-1.33091	1348	80	-10.3567	900	-6	0.0464513	0.953991	0.440032	0.0181997
15411963	15412463	AT4G31875	Chr4	15411700	15412289	NA	NA	Yes	0.205642	0.213766	15410003	15410503	AT4G31870	NA	NA	Yes	0.415602	0.28536	Chr4	15410204	15411617	+	1415	+	154	interaction149809	1960	17	0.070444	0	5	0.070444	500	-5.68898	1375	82	-10.3554	1200	-12	0.285133	0.699095	0.641802	3.14e-06
23451041	23451541	AT1G63230	Chr1	23450653	23452311	NA	NA	Yes	1.49521	0.357222	23449025	23449525	AT1G63220	NA	NA	Yes	0.778122	0.602608	Chr1	23448918	23450452	+	570	+	99	interaction41283	2016	11	0.070444	0.00215	2	0.070444	200	-1.33091	532	81	-10.3517	900	-6	-0.340222	0.586979	0.185371	0.462054
18026479	18026979	AT1G48742	Chr1	18026837	18027009	NA	NA	Yes	4.40829	3.50359	18025598	18026098	AT1G48740	NA	NA	Yes	0.968536	0.543074	Chr1	18023386	18026065	+	44	+	1363	interaction27550	881	8	0.070444	1	1	0.070444	100	-0.443136	19	1314	-10.3468	700	-4	NA	NA	0.00665335	0.996967
23562511	23563011	AT1G63522	Chr1	23562204	23562482	NA	NA	NA	0.156222	0.2582	23559980	23560480	AT1G63520	NA	NA	NA	0.185641	0.247435	Chr1	23559886	23562143	+	29	+	490	interaction41695	2531	8	0.070444	1	1	0.070444	100	-0.443136	19	655	-10.3468	700	-4	-1.43939	NA	-0.633675	0.36776
17888085	17888585	AT3G48310	Chr3	17888100	17889814	Yes	NA	Yes	0.418955	0.274298	17886996	17887496	AT3G48300	Yes	NA	Yes	12.6483	15.9235	Chr3	17885523	17887118	+	791	+	48	interaction114378	1089	8	0.070444	1	1	0.070444	100	-0.443136	720	19	-10.3468	700	-4	0.339003	0.0470292	-0.590042	0.622428
15986032	15986532	AT5G39930	Chr5	15985024	15987339	Yes	NA	Yes	0.11673	0.188341	15981397	15981897	AT5G39910	Yes	NA	Yes	5.28784	4.02086	Chr5	15979411	15981671	+	591	+	57	interaction178954	4635	8	0.070444	1	1	0.070444	100	-0.443136	796	19	-10.3468	700	-4	1.53562	NA	NA	NA
26420446	26420946	AT1G70160	Chr1	26419948	26422529	NA	NA	NA	2.51085	0.877328	26419104	26419604	AT1G70150	NA	NA	NA	0.13042	0.205486	Chr1	26416897	26419588	+	1574	+	132	interaction50294	1342	17	0.070444	0	5	0.070444	500	-5.68801	1542	83	-10.345	1200	-12	0.163253	0.30944	0.079481	0.874212
[truncated: 626 more rows]
