# Supplementary material for: Polycomb-dependent differential chromatin compartmentalization determines gene coregulation in Arabidopsis
Source: HighWire-hosted journal article supplement (doi:10.1101/gr.273771.120), 2021-06-03
Supplement: Supplemental_Table_S19.xlsx [file Supplemental_Table_S19.xlsx]

## Sheet: S19
Supplementary Table S19: C-Hi-C_clf_Figure5D
hypo_clf AND "clf loop"							hyper_clf AND "clf loop"
Gene	#'chr'	'start'	'end'	Clf	Col0		Gene	#'chr'	'start'	'end'	Clf	Col0
AT1G02940	Chr1	663078	664128	1.23165	2.86712		AT1G01290	Chr1	114285	116108	0.234464	0.120682
AT1G03820	Chr1	959868	960728	1.65053	3.76085		AT1G02310	Chr1	458132	460696	3.67438	2.11543
AT1G09483	Chr1	3060991	3061729	4.39642	6.15594		AT1G02390	Chr1	480851	483292	17.8242	9.19498
AT1G10586	Chr1	3496927	3499439	1.65746	4.34713		AT1G02680	Chr1	580624	582310	0.704152	0.438486
AT1G11980	Chr1	4045618	4045855	1.51532	3.08961		AT1G02810	Chr1	618264	620480	9.21993	5.31109
AT1G12190	Chr1	4132966	4134094	2.3894	6.42829		AT1G02813	Chr1	620677	621289	15.0899	7.31879
AT1G12540	Chr1	4272959	4274206	2.44881	5.43805		AT1G02816	Chr1	621460	622469	0.496732	0.239963
AT1G13610	Chr1	4663830	4666031	3.03715	5.75722		AT1G03800	Chr1	957260	957998	16.8232	8.24474
AT1G14600	Chr1	5001010	5003370	1.89246	2.77085		AT1G03870	Chr1	982505	983540	4.39165	2.30176
AT1G17190	Chr1	5875349	5876545	4.26804	4.74704		AT1G04330	Chr1	1161310	1161982	6.99117	4.0034
AT1G17200	Chr1	5878399	5880041	1.12312	2.90674		AT1G04450	Chr1	1208520	1209874	8.52842	8.02839
AT1G20120	Chr1	6975387	6977264	1.0808	1.99889		AT1G05385	Chr1	1582670	1583718	0.217726	0.147859
AT1G20132	Chr1	6981263	6983627	1.1141	3.01488		AT1G05400	Chr1	1584072	1585421	5.85932	3.04237
AT1G21323	Chr1	7466693	7467359	0.758556	2.33293		AT1G05410	Chr1	1585370	1587778	0.68588	0.464874
AT1G22010	Chr1	7749570	7750062	9.0085	14.2486		AT1G05420	Chr1	1590072	1590753	16.7209	9.08177
AT1G22015	Chr1	7751001	7753519	2.53144	6.08674		AT1G05550	Chr1	1640958	1643917	1.33457	1.16575
AT1G22150	Chr1	7818360	7821344	0.747676	1.69319		AT1G06270	Chr1	1918087	1919760	0.561437	0.331929
AT1G23724	Chr1	8393186	8393330	1.56769	5.79549		AT1G06290	Chr1	1922351	1926278	0.325826	0.188464
AT1G23730	Chr1	8395556	8398144	2.87535	4.65221		AT1G06620	Chr1	2025600	2027271	4.42312	2.5518
AT1G24000	Chr1	8496056	8496566	1.74792	5.88222		AT1G06800	Chr1	2089416	2091686	3.25871	1.42317
AT1G24010	Chr1	8498802	8499499	3.38231	7.91769		AT1G06810	Chr1	2091737	2092528	11.2574	5.19375
AT1G24020	Chr1	8500399	8502065	1.71019	4.38982		AT1G07090	Chr1	2173951	2174894	16.7204	5.78519
AT1G25320	Chr1	8877856	8880310	0.423882	0.781351		AT1G08580	Chr1	2715078	2716404	0.294694	0.172355
AT1G28306	Chr1	9907201	9907615	1.02419	10.6449		AT1G08990	Chr1	2888752	2890959	20.1438	9.61082
AT1G28470	Chr1	10010180	10012198	3.58525	5.6451		AT1G09000	Chr1	2891036	2895182	0.682226	0.379251
AT1G28480	Chr1	10013473	10014073	3.22506	4.46463		AT1G09750	Chr1	3157500	3159148	1.57819	0.767349
AT1G28590	Chr1	10047275	10049300	3.38076	6.12559		AT1G10385	Chr1	3403223	3405856	6.15161	3.68844
AT1G28610	Chr1	10053616	10055731	0.710031	2.22151		AT1G11370	Chr1	3828097	3830945	14.0409	7.76991
AT1G28630	Chr1	10058455	10063460	0.400044	1.72844		AT1G11600	Chr1	3902011	3903782	18.6519	9.38338
AT1G30160	Chr1	10606209	10607810	6.1047	8.50949		AT1G14040	Chr1	4810487	4814543	2.21403	1.20148
AT1G30910	Chr1	11000882	11002936	0.305471	0.449144		AT1G14420	Chr1	4931565	4933515	1.63882	0.963079
AT1G31140	Chr1	11117992	11119785	0.770981	1.71244		AT1G15350	Chr1	5278259	5279877	0.338942	0.177669
AT1G31250	Chr1	11166556	11167547	2.66909	4.93889		AT1G15360	Chr1	5283537	5284673	20.0868	11.0677
AT1G31720	Chr1	11356101	11357081	6.71014	7.37103		AT1G16290	Chr1	5570752	5573538	2.34659	1.40923
AT1G32510	Chr1	11756999	11758118	0.90462	2.21855		AT1G18310	Chr1	6301199	6303956	1.57708	0.99601
AT1G33530	Chr1	12159883	12161314	10.167	10.8014		AT1G19160	Chr1	6614161	6615214	3.90513	2.37618
AT1G33820	Chr1	12278437	12279451	3.49963	7.68372		AT1G19170	Chr1	6616642	6618986	0.999445	0.568051
AT1G33850	Chr1	12287912	12288210	0.577413	4.66876		AT1G19670	Chr1	6803610	6805044	6.80371	3.41593
AT1G33880	Chr1	12303861	12304911	2.68828	6.39723		AT1G19680	Chr1	6805456	6807862	0.259121	0.171207
AT1G33890	Chr1	12308283	12309686	2.56336	6.44163		AT1G20340	Chr1	7042428	7043363	0.694462	0.385907
AT1G33900	Chr1	12311517	12313518	2.66166	5.3929		AT1G20350	Chr1	7043712	7044592	3.22177	1.90275
AT1G34440	Chr1	12591347	12592737	0.233644	1.33314		AT1G22570	Chr1	7976619	7978573	4.86124	3.09964
AT1G35170	Chr1	12870737	12872194	0.725146	1.80523		AT1G22600	Chr1	7987140	7989217	4.88687	2.69898
AT1G35181	Chr1	12879305	12879470	0.635136	1.94926		AT1G23205	Chr1	8233996	8234893	11.1096	5.81205
AT1G35255	Chr1	12935646	12936553	2.35974	5.53172		AT1G26380	Chr1	9126736	9128528	8.38667	4.93352
AT1G35260	Chr1	12936848	12937787	3.53477	7.28135		AT1G27170	Chr1	9433487	9439417	0.482302	0.272432
AT1G35310	Chr1	12956158	12957090	2.04704	5.4027		AT1G27580	Chr1	9589932	9591075	3.71381	2.22242
AT1G35320	Chr1	12959056	12962853	0.624485	2.02028		AT1G28390	Chr1	9966185	9968301	5.0572	2.96376
AT1G35880	Chr1	13339850	13341228	2.10754	2.22923		AT1G29160	Chr1	10183796	10184324	12.4939	7.11453
AT1G35890	Chr1	13341299	13341953	3.44232	4.59301		AT1G29395	Chr1	10288196	10289621	1.86442	0.928703
AT1G36060	Chr1	13454495	13456331	2.31151	2.3259		AT1G30050	Chr1	10543021	10544591	1.47224	0.866457
AT1G44542	Chr1	16864969	16866605	2.17825	4.0754		AT1G32100	Chr1	11546337	11547994	11.3681	5.74485
AT1G46336	Chr1	17230410	17230653	0.537974	2.33973		AT1G33520	Chr1	12157155	12158953	0.388472	0.28579
AT1G46408	Chr1	17232134	17232935	2.81891	5.68107		AT1G49930	Chr1	18484931	18485639	15.1951	7.78
AT1G46840	Chr1	17270184	17271706	4.20696	8.02196		AT1G54340	Chr1	20283479	20286786	0.900629	0.454423
AT1G47780	Chr1	17594682	17595343	3.5582	6.66039		AT1G55700	Chr1	20821600	20823640	13.2341	8.10229
AT1G47786	Chr1	17597897	17599099	1.41554	4.48062		AT1G55930	Chr1	20918716	20922232	0.57527	0.466423
AT1G47790	Chr1	17600003	17601173	7.30358	12.1018		AT1G62490	Chr1	23130404	23131533	0.802468	0.567573
AT1G47800	Chr1	17601512	17602676	4.93154	12.0084		AT1G64660	Chr1	24028917	24030780	3.76731	1.80069
AT1G47810	Chr1	17603503	17604559	4.47724	9.17292		AT1G64780	Chr1	24060769	24062630	8.18727	4.34838
AT1G49300	Chr1	18234723	18237543	0.715881	1.13818		AT1G64910	Chr1	24115136	24116747	20.4459	10.9033
AT1G49310	Chr1	18237862	18238367	5.08371	8.66483		AT1G65210	Chr1	24224811	24225815	6.69207	3.30375
AT1G50960	Chr1	18889548	18891719	5.09501	10.5985		AT1G66120	Chr1	24612619	24614805	17.1697	10.0128
AT1G51190	Chr1	18977283	18980618	8.41837	11.7661		AT1G66130	Chr1	24614961	24616930	0.635904	0.603838
AT1G51250	Chr1	19001543	19002215	1.34283	8.57216		AT1G67760	Chr1	25405579	25406372	21.3775	13.5636
AT1G51260	Chr1	19003375	19005641	1.20882	5.9582		AT1G67810	Chr1	25426487	25427349	10.8344	6.58653
AT1G51270	Chr1	19007509	19011272	1.63769	7.23268		AT1G68510	Chr1	25706881	25708255	16.4665	9.06789
AT1G51300	Chr1	19014259	19016103	4.42846	10.1691		AT1G68520	Chr1	25709113	25710907	10.1562	7.09874
AT1G51840	Chr1	19249448	19250709	1.98307	5.86577		AT1G70250	Chr1	26452964	26456088	5.38993	4.52568
AT1G51850	Chr1	19252846	19256783	1.45435	4.56938		AT1G70949	Chr1	26752400	26752664	0.525431	0.432744
AT1G51860	Chr1	19257633	19261479	1.28596	2.60092		AT1G70990	Chr1	26767296	26768076	10.0557	4.84466
AT1G51890	Chr1	19274657	19278528	0.666805	2.7072		AT1G71000	Chr1	26769335	26770111	13.0281	5.66626
AT1G51900	Chr1	19279883	19282895	3.72875	9.37061		AT1G71160	Chr1	26828700	26830208	8.95364	5.55935
AT1G51990	Chr1	19330948	19332667	0.672344	2.10291		AT1G71696	Chr1	26966886	26970572	0.887137	0.214796
AT1G52800	Chr1	19664043	19665362	2.80221	5.29872		AT1G71770	Chr1	26990524	26994259	2.98005	1.72001
AT1G52990	Chr1	19740502	19743449	1.92967	3.29663		AT1G72090	Chr1	27123566	27126895	0.875031	0.4528
AT1G53640	Chr1	20020884	20025461	3.89706	5.53537		AT1G72100	Chr1	27127211	27128978	15.7121	8.97056
AT1G53815	Chr1	20090248	20090962	1.50518	3.40022		AT1G72125	Chr1	27134167	27136389	10.1039	4.79488
AT1G53820	Chr1	20091490	20092423	3.73581	7.00104		AT1G72430	Chr1	27264910	27265630	3.97101	1.5317
AT1G53940	Chr1	20143278	20145780	1.19603	3.27311		AT1G72790	Chr1	27394746	27396799	0.245304	0.161323
AT1G53970	Chr1	20148418	20148898	0.966256	2.1229		AT1G72800	Chr1	27397215	27398500	4.09762	2.56629
AT1G53980	Chr1	20149333	20149609	3.34717	5.56326		AT1G73110	Chr1	27494120	27496878	0.332357	0.200302
AT1G54000	Chr1	20154168	20156419	3.43645	7.45694		AT1G73560	Chr1	27649694	27650471	3.24961	2.25161
AT1G54010	Chr1	20158663	20160815	1.32997	4.38559		AT1G75490	Chr1	28335501	28336706	8.30075	2.77501
AT1G54520	Chr1	20363447	20366061	0.344725	0.348129		AT1G76210	Chr1	28594949	28595981	13.5931	7.6603
AT1G54540	Chr1	20367571	20368434	3.30068	6.20168		AT1G76230	Chr1	28599759	28600442	23.0027	12.5575
AT1G54550	Chr1	20369650	20370986	2.8896	8.74174		AT1G76430	Chr1	28678934	28681995	8.033	5.01649
AT1G55590	Chr1	20769319	20771871	0.651823	0.848164		AT1G76440	Chr1	28682128	28683750	0.469571	0.388407
AT1G55600	Chr1	20774045	20776294	3.99185	5.47598		AT1G77640	Chr1	29178736	29179675	12.7404	6.69857
AT1G55660	Chr1	20800693	20802340	1.0278	2.58309		AT1G77650	Chr1	29181109	29182261	17.6171	10.6914
AT1G56380	Chr1	21101326	21102701	2.80027	6.23426		AT1G78500	Chr1	29531645	29535177	4.44336	2.27839
AT1G56400	Chr1	21111804	21113621	3.7538	7.13024		AT1G78820	Chr1	29634123	29635813	5.79438	2.65732
AT1G56550	Chr1	21185661	21188369	2.42094	3.373		AT1G79420	Chr1	29871457	29874315	1.2436	0.91005
AT1G56553	Chr1	21189721	21190175	2.63539	3.49302		AT1G79840	Chr1	30036955	30041440	6.1874	4.96979
AT1G57550	Chr1	21312540	21312809	1.05163	2.54324		AT1G79860	Chr1	30042091	30044175	16.12	8.22469
AT1G57570	Chr1	21320937	21324637	3.26353	6.57634		AT1G79870	Chr1	30044745	30046027	0.551704	0.331282
AT1G58300	Chr1	21628011	21629996	1.8983	4.67743		AT1G80330	Chr1	30198060	30199537	2.81992	1.64789
AT1G58390	Chr1	21690961	21694447	0.636343	1.47052		AT1G80340	Chr1	30200692	30202200	10.2355	4.20011
AT1G58400	Chr1	21696164	21699118	0.985864	3.53385		AT2G02990	Chr2	873505	874811	1.58506	1.33216
AT1G59660	Chr1	21924692	21929424	0.378662	0.482922		AT2G18620	Chr2	8078287	8079360	11.3859	6.88776
AT1G59670	Chr1	21930009	21931366	1.53602	6.9947		AT2G20570	Chr2	8855357	8857756	6.21771	4.04649
AT1G59675	Chr1	21931832	21932403	7.36352	12.7646		AT2G22170	Chr2	9426848	9427817	6.40785	4.29724
AT1G59680	Chr1	21933020	21934216	5.07236	10.5478		AT2G22540	Chr2	9579873	9583893	2.1534	0.675448
AT1G59690	Chr1	21935309	21935820	1.28982	6.8168		AT2G23130	Chr2	9844298	9845385	3.63736	1.88013
AT1G59700	Chr1	21936295	21937959	0.611553	2.36592		AT2G28790	Chr2	12354429	12355431	24.1764	10.4703
AT1G59970	Chr1	22073533	22074876	0.574611	1.09157		AT2G29220	Chr2	12562780	12564664	14.3909	8.12107
AT1G60390	Chr1	22247473	22249636	1.813	2.30107		AT2G29600	Chr2	12655150	12657296	10.6081	5.86787
AT1G60410	Chr1	22258981	22260715	6.73654	9.51654		AT2G30210	Chr2	12887445	12889874	7.16429	4.29137
AT1G60450	Chr1	22271225	22273214	0.996241	1.984		AT2G31005	Chr2	13193503	13193797	1.16537	0.657134
AT1G60983	Chr1	22455319	22455589	0.744306	3.95425		AT2G31460	Chr2	13404775	13405510	7.27012	4.07124
AT1G60986	Chr1	22458999	22459650	1.27654	4.22021		AT2G32030	Chr2	13632467	13633335	3.34643	1.91594
AT1G61080	Chr1	22493193	22497019	0.943815	1.98224		AT2G32100	Chr2	13647851	13648785	4.83285	1.8584
AT1G61563	Chr1	22714920	22715448	3.0472	6.26022		AT2G33070	Chr2	14028281	14031164	16.4823	8.00685
AT1G61566	Chr1	22717059	22717610	0.422459	1.98617		AT2G34700	Chr2	14634133	14635627	13.1319	7.40898
AT1G61590	Chr1	22723500	22726074	5.73428	7.42367		AT2G34980	Chr2	14748966	14749878	0.330031	0.215284
AT1G61630	Chr1	22744206	22746111	2.12134	9.11713		AT2G34990	Chr2	14750259	14751168	5.07346	3.09897
AT1G61640	Chr1	22746371	22749184	0.276549	0.340068		AT2G35000	Chr2	14751573	14753319	6.84885	3.88433
AT1G61660	Chr1	22753714	22756300	6.34597	8.98309		AT2G35810	Chr2	15049149	15050323	4.81114	2.71255
AT1G61700	Chr1	22787011	22788333	1.27144	3.10953		AT2G35830	Chr2	15052198	15053275	3.07093	2.44022
AT1G61710	Chr1	22788858	22790576	4.27354	4.98583		AT2G35960	Chr2	15106939	15107993	2.0297	1.1175
AT1G61750	Chr1	22804612	22806318	9.58772	9.78528		AT2G36050	Chr2	15135571	15136749	5.40584	3.22518
AT1G62262	Chr1	23000156	23002093	3.57978	3.8047		AT2G36640	Chr2	15356833	15358612	8.67083	4.18397
AT1G62300	Chr1	23016682	23019279	7.48885	8.78499		AT2G36970	Chr2	15529005	15530749	4.29122	2.49388
AT1G62510	Chr1	23136368	23137191	5.26101	6.73215		AT2G37100	Chr2	15591100	15592104	6.44717	3.14449
AT1G62530	Chr1	23146331	23148367	0.461574	2.50757		AT2G37780	Chr2	15837441	15838302	3.65867	2.09872
AT1G62710	Chr1	23223873	23226916	2.70163	5.4561		AT2G38870	Chr2	16236380	16237280	2.23227	1.29084
AT1G62975	Chr1	23328849	23330776	0.546138	2.30505		AT2G39250	Chr2	16388885	16391073	6.8664	3.02147
AT1G63070	Chr1	23385323	23387167	5.1534	5.8653		AT2G40250	Chr2	16813329	16815251	1.39829	1.04763
AT1G64360	Chr1	23887869	23888533	0.712899	1.4594		AT2G40510	Chr2	16918432	16919888	0.298171	0.242047
AT1G64370	Chr1	23888919	23889661	2.16485	4.82389		AT2G41100	Chr2	17137828	17139612	1.7406	1.11887
AT1G65200	Chr1	24218469	24222789	0.961808	1.75411		AT2G41130	Chr2	17143293	17144949	18.8652	10.2949
AT1G65352	Chr1	24277771	24278298	0.892342	2.85148		AT2G41380	Chr2	17251940	17253057	5.98511	3.81283
AT1G65360	Chr1	24281336	24282151	1.3287	3.72605		AT2G42540	Chr2	17711031	17712330	7.39107	3.73892
AT1G65370	Chr1	24284468	24286145	0.91433	2.35605		AT2G42550	Chr2	17713195	17714230	5.63756	4.32635
AT1G65390	Chr1	24292477	24294631	2.79121	3.61057		AT2G43060	Chr2	17909184	17910082	13.7313	5.61328
AT1G65510	Chr1	24359452	24360081	0.739307	2.67154		AT2G43070	Chr2	17910887	17914870	0.446303	0.306045
AT1G65520	Chr1	24361031	24361993	0.274917	0.436097		AT2G43590	Chr2	18081330	18082767	12.6532	7.30308
AT1G65681	Chr1	24428874	24430670	1.88185	5.19457		AT2G44020	Chr2	18217558	18219385	0.483128	0.270724
AT1G65690	Chr1	24431429	24432953	2.4744	3.73682		AT2G44030	Chr2	18220085	18221228	13.9427	6.91214
AT1G65730	Chr1	24442503	24446291	2.23829	4.26927		AT2G44290	Chr2	18305200	18306251	1.57228	0.997101
AT1G65740	Chr1	24452095	24453211	3.15651	10.8729		AT2G44910	Chr2	18517886	18519525	2.85743	1.74561
AT1G65780	Chr1	24462957	24466888	1.15553	4.0487		AT2G45430	Chr2	18727560	18728935	31.9006	16.7169
AT1G65800	Chr1	24473120	24476715	0.662959	2.07912		AT2G45570	Chr2	18779792	18781958	1.30849	0.855254
AT1G65850	Chr1	24494677	24498542	2.89511	6.09422		AT2G46150	Chr2	18961402	18962376	4.08042	3.30715
AT1G65860	Chr1	24499065	24502745	1.74196	5.39423		AT2G46160	Chr2	18963082	18963885	7.73736	4.24159
AT1G66310	Chr1	24722970	24724475	5.16432	9.83038		AT2G47200	Chr2	19377728	19378331	6.81219	3.62762
AT1G66320	Chr1	24726811	24728614	6.50415	7.01685		AT2G47210	Chr2	19378868	19382418	0.390005	0.205136
AT1G67148	Chr1	25121234	25121898	1.02061	3.18027		AT2G47460	Chr2	19476336	19479478	4.80978	3.00618
AT1G67150	Chr1	25122458	25124695	4.43721	6.54976		AT2G47485	Chr2	19485874	19486553	7.24975	2.96385
AT1G67450	Chr1	25266162	25267359	2.06481	4.52003		AT2G48090	Chr2	19669109	19669764	6.94676	3.49861
AT1G67455	Chr1	25268144	25269475	1.02159	2.75057		AT3G01510	Chr3	198678	201742	0.657428	0.339931
AT1G67775	Chr1	25411311	25411696	0.996537	2.70776		AT3G01900	Chr3	312358	313849	24.04	10.3114
AT1G68750	Chr1	25822941	25828107	2.86907	4.63542		AT3G02020	Chr3	340545	343835	0.803632	0.471506
AT1G69790	Chr1	26266608	26269013	0.558635	1.61738		AT3G05625	Chr3	1632283	1634139	0.360672	0.244043
AT1G69860	Chr1	26309627	26312174	1.65415	4.53507		AT3G06360	Chr3	1928901	1929446	16.5892	7.46205
AT1G69870	Chr1	26316026	26320220	2.20548	3.25779		AT3G06370	Chr3	1930395	1934073	3.48532	2.63231
AT1G73270	Chr1	27549020	27552517	2.40745	3.7825		AT3G09330	Chr3	2864781	2867230	1.22954	0.816978
AT1G73280	Chr1	27552969	27555322	1.0766	2.02223		AT3G09400	Chr3	2891039	2893629	5.65749	3.78415
AT1G77340	Chr1	29068342	29069828	1.36925	2.38755		AT3G10190	Chr3	3155297	3156143	6.68413	3.63772
AT1G78476	Chr1	29523981	29526284	1.51498	3.60802		AT3G10710	Chr3	3352288	3354237	1.68533	0.781459
AT1G80110	Chr1	30135380	30136956	2.38372	3.95793		AT3G10720	Chr3	3354446	3357614	1.37576	0.759539
AT2G03710	Chr2	1129267	1131838	3.52637	6.01465		AT3G11110	Chr3	3479978	3480455	15.3624	7.08081
AT2G03720	Chr2	1132169	1133379	0.669049	1.26857		AT3G11210	Chr3	3510662	3513060	0.93759	0.503289
AT2G03740	Chr2	1142724	1143988	7.77592	9.73542		AT3G11370	Chr3	3561098	3562880	5.86959	3.84804
AT2G03830	Chr2	1171135	1172363	1.07808	2.75791		AT3G11380	Chr3	3564078	3565779	2.68356	2.34827
AT2G03840	Chr2	1173169	1174115	2.46364	4.83534		AT3G12970	Chr3	4141050	4142548	3.24863	1.51509
AT2G05400	Chr2	1974885	1976570	2.03982	5.31999		AT3G13760	Chr3	4517516	4519475	5.45741	3.49593
AT2G05410	Chr2	1976917	1978553	7.66834	9.79669		AT3G14370	Chr3	4797844	4799504	14.6476	7.94651
AT2G15590	Chr2	6801942	6802618	4.91123	8.45768		AT3G15240	Chr3	5133605	5135902	4.55377	3.31943
AT2G16230	Chr2	7035462	7038326	2.51328	6.57734		AT3G15250	Chr3	5136261	5137195	9.53937	5.15712
AT2G16970	Chr2	7369548	7375528	1.42535	4.27605		AT3G15290	Chr3	5144996	5146856	0.505017	0.261904
AT2G16980	Chr2	7376348	7381103	1.22824	4.44291		AT3G15356	Chr3	5174401	5175469	1.70263	0.908255
AT2G18070	Chr2	7852528	7853666	6.76258	13.6575		AT3G15690	Chr3	5316915	5319613	0.315403	0.228617
AT2G18080	Chr2	7857197	7859715	5.53078	9.7216		AT3G16050	Chr3	5443949	5445329	0.271689	0.141811
AT2G18360	Chr2	7976711	7979377	2.32001	4.02207		AT3G16240	Chr3	5505403	5507050	2.67748	1.57143
AT2G18600	Chr2	8073199	8074982	3.94517	5.29625		AT3G16920	Chr3	5776485	5777889	16.9577	7.50681
AT2G18690	Chr2	8097419	8098827	0.762551	4.04648		AT3G17520	Chr3	5999288	6000370	7.1758	4.46554
AT2G19040	Chr2	8249922	8250141	0.71744	7.78757		AT3G20550	Chr3	7174463	7177942	0.496303	0.309335
AT2G19045	Chr2	8251673	8251892	6.23725	10.4408		AT3G22840	Chr3	8084446	8085560	19.8682	9.11553
AT2G21920	Chr2	9343409	9347159	2.10774	4.949		AT3G25730	Chr3	9396419	9397747	18.6349	6.67869
AT2G22145	Chr2	9420319	9420589	1.26107	3.89205		AT3G26390	Chr3	9663449	9663950	2.61857	1.55602
AT2G22530	Chr2	9572795	9577441	0.280318	0.412916		AT3G28321	Chr3	10583133	10583277	3.88288	2.78181
AT2G22640	Chr2	9623067	9624218	0.31881	0.337924		AT3G47390	Chr3	17459338	17464716	0.272045	0.183704
AT2G22930	Chr2	9759672	9761163	1.7712	2.7413		AT3G49950	Chr3	18522509	18523906	21.1108	10.1599
AT2G22980	Chr2	9778876	9783251	0.251503	1.27879		AT3G50220	Chr3	18617423	18618729	25.5262	12.0509
AT2G23830	Chr2	10143645	10144511	0.990771	1.98691		AT3G50390	Chr3	18702073	18703619	14.4754	8.18934
AT2G25230	Chr2	10747210	10748467	1.08003	2.46225		AT3G50770	Chr3	18873957	18874780	18.0837	11.7275
AT2G25355	Chr2	10801277	10803722	0.297473	0.496344		AT3G50780	Chr3	18875398	18877534	0.252223	0.198326
AT2G25360	Chr2	10804248	10805761	2.28239	5.90382		AT3G50960	Chr3	18938696	18940428	0.413478	0.265095
AT2G25540	Chr2	10866821	10872077	0.970073	1.16482		AT3G50970	Chr3	18940776	18941554	14.5742	6.55784
AT2G25790	Chr2	11000598	11004235	8.37347	8.90729		AT3G50980	Chr3	18941924	18942865	6.43281	4.4614
AT2G27370	Chr2	11708449	11710004	2.33885	5.31581		AT3G50990	Chr3	18943134	18944811	6.01461	4.95911
AT2G28030	Chr2	11934207	11935386	4.40193	6.49644		AT3G51180	Chr3	19013389	19016185	0.420428	0.298993
AT2G28960	Chr2	12437913	12442347	3.78889	7.29866		AT3G51600	Chr3	19138393	19139252	3.37696	1.75701
AT2G28970	Chr2	12443918	12448163	1.63542	6.34935		AT3G52480	Chr3	19452253	19453162	9.85708	4.29625
AT2G28990	Chr2	12455054	12459541	1.34759	7.23003		AT3G53690	Chr3	19898787	19900065	1.44141	0.820224
AT2G29000	Chr2	12460780	12465037	1.87782	6.35098		AT3G53710	Chr3	19903312	19905489	0.353914	0.19791
AT2G29100	Chr2	12501091	12504912	1.64111	2.59296		AT3G53720	Chr3	19905677	19910112	6.84999	3.47772
AT2G29110	Chr2	12506879	12510552	2.56397	5.45756		AT3G54760	Chr3	20269079	20272457	0.339558	0.189141
AT2G29330	Chr2	12594589	12596330	0.874312	2.59259		AT3G54770	Chr3	20273715	20275898	10.8545	6.96159
AT2G29430	Chr2	12619553	12620027	0.326587	1.11615		AT3G54990	Chr3	20373717	20376522	0.94389	0.31413
AT2G29440	Chr2	12620059	12621148	1.02273	2.51897		AT3G55130	Chr3	20433877	20436390	22.3855	11.2143
AT2G29490	Chr2	12631377	12632473	0.448827	1.24689		AT3G56810	Chr3	21036759	21038947	5.41944	3.17072
AT2G31110	Chr2	13258328	13262099	0.363667	1.51225		AT3G57620	Chr3	21337563	21339301	22.8981	10.2912
AT2G31180	Chr2	13286720	13288176	0.977012	2.12063		AT3G57630	Chr3	21339301	21343796	2.15512	1.05963
AT2G31470	Chr2	13407491	13408655	2.2597	4.41178		AT3G60420	Chr3	22334423	22337617	2.22313	1.6419
AT2G31480	Chr2	13408977	13410999	1.16581	1.60847		AT3G61270	Chr3	22678150	22680379	5.9128	3.76766
AT2G31700	Chr2	13480509	13481568	1.04931	1.83747		AT3G61550	Chr3	22776400	22777225	4.40003	1.81637
AT2G32540	Chr2	13814685	13818289	1.72084	4.39809		AT3G61920	Chr3	22932495	22933362	11.953	6.28718
AT2G32550	Chr2	13819378	13822839	1.68887	2.3987		AT3G62070	Chr3	22983137	22984513	2.63667	1.09923
AT2G32788	Chr2	13904915	13905110	1.51134	2.74389		AT3G62950	Chr3	23266248	23266934	8.59702	4.54243
AT2G32830	Chr2	13927698	13929713	5.38133	7.73982		AT4G00300	Chr4	126508	130399	6.55934	3.72952
AT2G32860	Chr2	13940186	13943804	2.5886	6.60127		AT4G01140	Chr4	490748	492199	4.59177	2.61413
AT2G32870	Chr2	13944610	13946790	6.32022	7.67331		AT4G01180	Chr4	501286	503394	6.10608	3.83971
AT2G33385	Chr2	14147502	14149799	2.8364	4.17154		AT4G02235	Chr4	980954	981711	7.63882	3.93381
AT2G34110	Chr2	14392550	14403317	2.74627	2.93129		AT4G02250	Chr4	983969	984523	14.2114	8.07354
AT2G34350	Chr2	14493585	14495802	4.13031	5.07826		AT4G03630	Chr4	1608749	1610037	10.4457	5.7677
AT2G34820	Chr2	14689623	14690879	6.04837	10.9984		AT4G05350	Chr4	2726909	2727530	15.1406	7.97464
AT2G34825	Chr2	14691410	14691629	1.241	5.49249		AT4G11140	Chr4	6794775	6795793	2.91437	1.32172
AT2G36260	Chr2	15202645	15203703	1.51166	2.30053		AT4G12290	Chr4	7304404	7307138	2.57636	1.21734
AT2G36550	Chr2	15327478	15328802	0.756176	1.55331		AT4G13210	Chr4	7669947	7673376	10.4607	5.5336
AT2G36560	Chr2	15329142	15332447	4.1744	5.60207		AT4G14560	Chr4	8361057	8361986	9.59797	5.45306
AT2G39410	Chr2	16455568	16458217	3.61105	6.27081		AT4G14570	Chr4	8362183	8366653	0.273554	0.199349
AT2G39510	Chr2	16491142	16493151	8.45945	8.97429		AT4G16450	Chr4	9280019	9280854	0.762162	0.490671
AT2G39518	Chr2	16495874	16496995	0.804409	6.35027		AT4G16560	Chr4	9324745	9328628	7.69904	4.55853
AT2G39520	Chr2	16496812	16497621	0.790348	4.72001		AT4G16670	Chr4	9385218	9387754	2.79262	1.57063
AT2G39540	Chr2	16500865	16501241	3.5272	5.4329		AT4G16690	Chr4	9392146	9393529	4.02554	2.18419
AT2G40995	Chr2	17109393	17109712	2.06174	5.55953		AT4G18350	Chr4	10142649	10144445	9.31	5.40639
AT2G41997	Chr2	17110827	17111207	0.548277	2.03452		AT4G18650	Chr4	10263968	10265439	5.66841	3.65247
AT2G41473	Chr2	17294452	17294728	1.86589	3.54388		AT4G19610	Chr4	10677228	10681771	1.28849	0.650461
AT2G41475	Chr2	17295073	17296420	1.12197	2.86614		AT4G21445	Chr4	11424709	11425767	0.471556	0.328616
AT2G41860	Chr2	17467343	17469786	2.54877	3.96085		AT4G22090	Chr4	11704002	11706042	9.69355	6.43924
AT2G43140	Chr2	17931524	17935686	1.51062	2.12277		AT4G24310	Chr4	12600892	12601675	10.2763	5.3001
AT2G43650	Chr2	18099237	18103345	0.386458	0.42134		AT4G25940	Chr4	13169640	13172881	0.562637	0.477213
AT2G43660	Chr2	18103750	18104581	3.8761	5.08701		AT4G26270	Chr4	13300794	13304347	1.78522	1.31306
AT2G44460	Chr2	18346438	18349966	2.06105	2.59703		AT4G27130	Chr4	13604557	13606448	0.41636	0.229666
AT2G44470	Chr2	18354185	18358679	1.51507	2.2937		AT4G27250	Chr4	13642675	13644479	2.6294	1.639
AT2G44480	Chr2	18359733	18363088	0.505134	1.01961		AT4G28110	Chr4	13968028	13969384	16.9434	9.96279
AT2G45840	Chr2	18869260	18871561	1.52881	2.71038		AT4G30460	Chr4	14888979	14889802	23.3953	11.2382
AT2G46140	Chr2	18959077	18960547	2.64664	4.21338		AT4G31840	Chr4	15401639	15402617	0.263442	0.150608
AT2G46494	Chr2	19082343	19083811	2.6467	5.45838		AT4G33020	Chr4	15932602	15934267	7.00879	3.38056
AT2G46495	Chr2	19084133	19085704	1.4627	4.05238		AT4G33450	Chr4	16095391	16096610	16.2446	9.17027
AT2G46870	Chr2	19260917	19262404	6.51623	8.80137		AT4G35060	Chr4	16685719	16686703	9.45159	4.99534
AT2G46880	Chr2	19264572	19266446	2.91666	5.23552		AT4G37360	Chr4	17567123	17568858	2.0466	1.08494
AT2G46890	Chr2	19266732	19268170	0.331495	0.396701		AT4G37380	Chr4	17572039	17573938	0.336697	0.213727
AT3G01220	Chr3	73480	75538	3.52532	5.1874		AT4G37870	Chr4	17802693	17806539	0.546012	0.366052
AT3G01326	Chr3	115319	115756	2.31697	4.59263		AT4G38590	Chr4	18036091	18040928	1.02958	0.635707
AT3G01327	Chr3	116230	116548	0.837802	2.99383		AT4G38620	Chr4	18053550	18054999	5.51468	2.52577
AT3G01329	Chr3	118872	119178	0.851397	3.18355		AT4G39950	Chr4	18525245	18527579	23.3799	9.49158
AT3G01331	Chr3	119617	119917	0.744972	2.24639		AT5G02090	Chr5	412030	412698	7.82157	4.15361
AT3G01323	Chr3	121056	121423	1.70628	5.25152		AT5G03800	Chr5	1010779	1013586	0.563491	0.389555
AT3G01324	Chr3	122139	122448	1.51287	4.39298		AT5G05250	Chr5	1557036	1557998	2.73801	1.59635
AT3G02242	Chr3	420107	420680	5.76655	8.28961		AT5G06580	Chr5	2011287	2016539	0.677462	0.361514
AT3G05860	Chr3	1751405	1752355	3.04684	5.82004		AT5G07000	Chr5	2171402	2172939	13.4929	7.41977
AT3G07970	Chr3	2541005	2543432	2.90222	2.93352		AT5G07010	Chr5	2174677	2176106	20.144	9.20564
AT3G09260	Chr3	2840476	2843781	1.67546	2.16839		AT5G07330	Chr5	2315979	2316874	14.5644	7.19292
AT3G09290	Chr3	2856140	2856659	6.43597	6.5573		AT5G07340	Chr5	2317212	2319649	0.302862	0.208142
AT3G09930	Chr3	3053259	3055410	11.2714	11.9183		AT5G07770	Chr5	2474641	2479402	1.19986	0.782123
AT3G10595	Chr3	3311784	3312831	3.7541	8.30707		AT5G09440	Chr5	2938346	2939461	2.68406	1.74686
AT3G13730	Chr3	4497975	4500920	1.86458	2.47853		AT5G10625	Chr5	3358786	3359781	17.1215	9.45008
AT3G14820	Chr3	4978725	4980241	1.74003	2.86419		AT5G10630	Chr5	3360116	3364619	0.6435	0.408997
AT3G16420	Chr3	5579385	5580953	2.03506	4.16315		AT5G11530	Chr5	3695861	3701548	7.35959	5.25629
AT3G16430	Chr3	5581662	5583187	2.90665	5.31787		AT5G11540	Chr5	3703001	3704981	23.1546	14.7082
AT3G19895	Chr3	6917293	6921556	0.391704	0.549548		AT5G11610	Chr5	3735349	3738217	2.27303	2.21189
AT3G20690	Chr3	7231569	7232682	1.00506	2.71251		AT5G13080	Chr5	4149739	4151150	4.15079	3.23037
AT3G20980	Chr3	7355962	7357966	6.02735	13.2067		AT5G13330	Chr5	4272059	4274660	9.18403	6.22241
AT3G21340	Chr3	7511786	7515937	2.44659	3.77288		AT5G13350	Chr5	4279883	4282287	4.68672	2.53056
AT3G21360	Chr3	7522803	7524580	0.559967	1.97408		AT5G13620	Chr5	4385384	4386373	2.38361	1.28106
AT3G21370	Chr3	7524053	7527652	4.84106	5.86193		AT5G14730	Chr5	4756217	4757657	6.33848	3.68753
AT3G21700	Chr3	7644349	7646383	0.277816	0.892573		AT5G14920	Chr5	4826478	4827980	7.16413	3.20483
AT3G21710	Chr3	7648341	7649799	4.12873	10.001		AT5G15250	Chr5	4950358	4952803	3.92941	2.61077
AT3G21730	Chr3	7659555	7661232	0.705218	4.42707		AT5G17780	Chr5	5867282	5869050	2.88517	1.92051
AT3G21950	Chr3	7734395	7736394	4.35284	8.38776		AT5G17790	Chr5	5869709	5872718	0.5326	0.355099
AT3G21970	Chr3	7742458	7743601	4.58132	10.5844		AT5G17980	Chr5	5953595	5956745	4.52997	3.79394
AT3G22080	Chr3	7777817	7781718	7.03292	9.03053		AT5G18690	Chr5	6233518	6234206	8.60068	4.56552
AT3G22730	Chr3	8031340	8032459	3.07033	7.13781		AT5G19650	Chr5	6639631	6640297	18.1386	8.94099
AT3G22740	Chr3	8032958	8035809	2.93387	3.56485		AT5G20100	Chr5	6790055	6790725	16.1542	9.10503
AT3G22760	Chr3	8044454	8047530	0.318516	0.759242		AT5G20110	Chr5	6791486	6793346	1.12125	0.916221
AT3G22770	Chr3	8047683	8048667	0.661784	3.56927		AT5G20380	Chr5	6887724	6892432	0.840195	0.564753
AT3G22830	Chr3	8078819	8081051	1.60142	6.4309		AT5G20390	Chr5	6892830	6894195	6.77726	4.1801
AT3G23250	Chr3	8309208	8310826	4.74057	7.38808		AT5G20740	Chr5	7025685	7026532	22.5988	9.61941
AT3G23870	Chr3	8619191	8621907	0.419624	1.49276		AT5G20790	Chr5	7039910	7040654	6.79393	3.33872
AT3G24130	Chr3	8711662	8713424	3.08755	9.05567		AT5G20810	Chr5	7043897	7045712	1.66694	1.59466
AT3G24140	Chr3	8715235	8718211	8.94622	9.63298		AT5G20820	Chr5	7046750	7047396	28.6721	14.0115
AT3G24225	Chr3	8768845	8769172	4.4221	6.87856		AT5G22890	Chr5	7653256	7654724	13.7809	8.21395
AT3G24790	Chr3	9052981	9054531	2.08811	3.23622		AT5G23220	Chr5	7819815	7820676	34.019	16.4475
AT3G25170	Chr3	9165743	9166253	3.16387	4.41373		AT5G23230	Chr5	7825881	7826611	6.20398	3.03462
AT3G25750	Chr3	9400954	9402088	7.29215	9.17495		AT5G23240	Chr5	7826731	7828724	1.15143	0.698119
AT3G25760	Chr3	9403882	9405250	1.58695	3.20291		AT5G25350	Chr5	8794251	8797020	0.607511	0.532013
AT3G25770	Chr3	9406872	9407955	2.81984	4.18772		AT5G27310	Chr5	9625448	9626561	4.06559	2.7274
AT3G25780	Chr3	9409289	9410567	0.788137	2.61579		AT5G38490	Chr5	15411671	15413132	1.52844	1.00897
AT3G25790	Chr3	9413126	9415003	7.08711	9.02041		AT5G41580	Chr5	16626336	16630783	0.600984	0.539617
AT3G26270	Chr3	9627561	9629200	7.3171	8.12503		AT5G41590	Chr5	16632085	16633896	4.13994	2.7078
AT3G26280	Chr3	9630199	9632009	1.30406	2.75675		AT5G42900	Chr5	17197640	17199793	2.03693	1.11688
AT3G26290	Chr3	9632681	9634470	1.37072	2.46659		AT5G44345	Chr5	17862112	17863079	28.2227	15.8113
AT3G26934	Chr3	9928156	9929123	0.494649	2.11465		AT5G45690	Chr5	18534998	18536316	5.47378	3.51882
AT3G27500	Chr3	10182832	10185081	2.42948	3.57545		AT5G45700	Chr5	18537348	18538196	1.84864	1.44724
AT3G28220	Chr3	10524403	10526728	1.16817	2.29517		AT5G48480	Chr5	19644674	19645889	1.35429	0.849638
AT3G28243	Chr3	10532388	10532502	1.12248	5.9316		AT5G49200	Chr5	19947795	19949055	1.59372	0.940901
AT3G28260	Chr3	10534539	10536144	2.57868	6.92347		AT5G51510	Chr5	20921432	20922978	0.522209	0.414212
AT3G30260	Chr3	11909118	11912880	0.877831	4.81016		AT5G51720	Chr5	21009591	21010345	5.48849	3.02215
AT3G30280	Chr3	11914365	11915697	1.50252	5.26205		AT5G51730	Chr5	21011417	21013657	0.203464	0.151419
AT3G46340	Chr3	17026657	17031842	2.79373	6.07069		AT5G54060	Chr5	21936878	21938369	0.770573	0.559995
AT3G46350	Chr3	17036426	17041680	2.16118	6.7145		AT5G54062	Chr5	21938792	21939623	6.44773	4.41019
AT3G47600	Chr3	17539337	17541230	5.03776	8.69468		AT5G54770	Chr5	22246591	22248332	1.56378	0.774016
AT3G47760	Chr3	17611786	17616639	3.17598	4.8566		AT5G58500	Chr5	23645534	23646083	14.0709	6.80989
AT3G47770	Chr3	17618054	17622678	3.53592	5.78957		AT5G58660	Chr5	23701466	23703988	9.32875	4.95639
AT3G48260	Chr3	17873011	17875220	1.95677	5.25887		AT5G58670	Chr5	23704230	23706800	2.42925	1.71493
AT3G48310	Chr3	17888100	17889814	4.28325	7.25251		AT5G59060	Chr5	23844300	23844777	5.3205	2.44587
AT3G48340	Chr3	17897738	17899208	5.52831	8.12073		AT5G59070	Chr5	23845197	23847393	1.36878	0.770081
AT3G48344	Chr3	17902087	17902255	0.725405	2.01375		AT5G60110	Chr5	24201953	24202937	3.04944	1.8475
AT3G48970	Chr3	18152287	18153375	1.69078	2.83569		AT5G64760	Chr5	25893779	25896582	0.22699	0.138602
AT3G49030	Chr3	18173086	18174947	1.18871	4.11156		AT5G65300	Chr5	26095146	26095771	8.40969	3.92589
AT3G50350	Chr3	18672101	18674022	0.729731	0.736953		AT5G66690	Chr5	26625079	26626793	12.7326	7.11807
AT3G50460	Chr3	18727839	18728649	1.62231	3.00133		AT5G66830	Chr5	26691303	26692488	6.09535	3.41281
AT3G50470	Chr3	18729053	18730269	2.36278	4.14595		AT5G67060	Chr5	26766127	26767250	11.9213	5.20011
AT3G51690	Chr3	19176373	19178161	1.3194	3.97742		AT5G67180	Chr5	26801948	26804249	1.62172	0.878752
AT3G52680	Chr3	19527028	19531167	2.13562	3.59439		AT5G67620	Chr5	26964769	26965996	4.48869	2.71471
AT3G55910	Chr3	20742898	20743479	0.341096	0.595333
AT3G56780	Chr3	21031612	21033202	1.64866	4.90824
AT3G58300	Chr3	21582763	21583390	0.638058	1.44438
AT3G58310	Chr3	21584037	21585030	1.86026	4.74952
AT3G58320	Chr3	21585566	21586328	1.54361	4.07296
AT3G58330	Chr3	21587361	21588002	1.3344	4.56566
AT3G58350	Chr3	21591451	21592962	2.55526	7.31171
AT3G58360	Chr3	21593504	21594866	1.84888	6.0776
AT3G58370	Chr3	21595773	21596538	0.99459	4.15819
AT3G58410	Chr3	21604870	21606229	1.10286	1.40631
AT3G58880	Chr3	21768484	21770167	6.12693	9.66728
AT3G59260	Chr3	21903838	21905188	0.71749	1.83958
AT3G60140	Chr3	22216671	22220824	1.70369	4.09279
AT4G00315	Chr4	137403	138888	2.14715	6.12839
AT4G00320	Chr4	139938	141643	5.27186	5.49803
AT4G01420	Chr4	580037	581518	0.694529	3.49286
AT4G01430	Chr4	585597	588029	6.67257	7.9344
AT4G01450	Chr4	608453	610724	3.05383	4.52455
AT4G01510	Chr4	642732	644336	0.293849	0.38765
AT4G01516	Chr4	649861	649957	0.924227	2.96594
AT4G01535	Chr4	669338	669830	1.86936	1.97618
AT4G02290	Chr4	1002393	1005253	0.628304	0.638343
AT4G02300	Chr4	1009365	1013034	3.68013	3.90212
AT4G02690	Chr4	1185750	1187816	1.44582	5.03966
AT4G02700	Chr4	1188982	1193611	3.66406	5.21387
AT4G02740	Chr4	1217590	1220857	0.571323	0.72731
AT4G03565	Chr4	1586746	1587734	2.58509	5.62043
AT4G03600	Chr4	1603701	1604508	0.226138	0.259456
AT4G03610	Chr4	1604938	1606982	1.56935	3.52749
AT4G04080	Chr4	1963357	1964423	1.31018	3.10657
AT4G04890	Chr4	2476488	2482345	4.48942	4.52208
AT4G04900	Chr4	2486217	2487779	0.887528	3.09998
AT4G05110	Chr4	2626404	2628830	1.76418	3.47478
AT4G08150	Chr4	5147699	5150966	6.01734	7.53747
AT4G08151	Chr4	5151862	5151979	1.06657	4.46862
AT4G08360	Chr4	5295932	5296978	1.35064	2.55898
AT4G09850	Chr4	6192511	6193130	3.12801	5.25346
AT4G09860	Chr4	6194708	6195301	0.39763	2.47878
AT4G09960	Chr4	6236374	6240932	5.14497	8.96634
AT4G10260	Chr4	6371376	6372770	1.22928	2.9811
AT4G10410	Chr4	6448982	6449998	2.71899	3.12522
AT4G10595	Chr4	6545339	6546401	0.656304	2.41109
AT4G10600	Chr4	6547785	6548864	0.503082	1.6043
AT4G11050	Chr4	6747466	6751311	0.890158	3.37408
AT4G11211	Chr4	6836105	6836588	1.66187	3.2693
AT4G11400	Chr4	6938716	6940539	0.412648	2.44176
AT4G12360	Chr4	7327991	7329192	1.58125	5.12361
AT4G12890	Chr4	7546376	7547641	1.379	3.52551
AT4G12930	Chr4	7573280	7573706	2.17182	5.55918
AT4G12960	Chr4	7583271	7584630	3.35578	5.52498
AT4G13080	Chr4	7626611	7628367	0.593122	2.78741
AT4G13090	Chr4	7631534	7632870	4.68377	4.97304
AT4G13230	Chr4	7675652	7676680	1.80756	3.37396
AT4G13235	Chr4	7677865	7678247	2.31984	5.34475
AT4G13480	Chr4	7836674	7837684	4.50806	7.57075
AT4G13490	Chr4	7839136	7840284	4.74959	8.97879
AT4G14165	Chr4	8174597	8175715	3.37573	5.43864
AT4G14630	Chr4	8392840	8393813	1.02184	2.69857
AT4G15040	Chr4	8581372	8584122	0.774518	1.10084
AT4G15053	Chr4	8591929	8593834	0.23557	0.764659
AT4G15330	Chr4	8751386	8753157	13.4828	14.3208
AT4G15340	Chr4	8754479	8760589	3.92043	8.33041
AT4G15350	Chr4	8762952	8764594	4.80989	9.81194
AT4G15610	Chr4	8909063	8910908	1.84995	2.84006
AT4G15630	Chr4	8917429	8918852	2.15567	2.64905
AT4G15670	Chr4	8929178	8929765	7.48384	11.2085
AT4G15680	Chr4	8931651	8932295	9.79095	10.5863
AT4G15735	Chr4	8963040	8963583	0.82884	3.27839
AT4G15960	Chr4	9045623	9047449	2.18465	3.5889
AT4G15970	Chr4	9049327	9051370	3.90412	9.61714
AT4G15990	Chr4	9061268	9061676	1.97635	6.27792
AT4G16000	Chr4	9063844	9064481	0.59788	3.00633
AT4G16730	Chr4	9402897	9406003	3.52091	5.87434
AT4G16920	Chr4	9519172	9525691	0.224391	0.396169
AT4G17780	Chr4	9880258	9881455	2.18268	4.0641
AT4G17785	Chr4	9881634	9883432	4.87691	7.83835
AT4G17980	Chr4	9978849	9980038	1.34502	2.88274
AT4G18050	Chr4	10022204	10027415	0.862111	1.27082
AT4G18340	Chr4	10130049	10132061	2.54306	4.1446
AT4G18790	Chr4	10317784	10319660	1.85037	2.76197
AT4G18860	Chr4	10344686	10345588	1.79831	2.78411
AT4G18870	Chr4	10346167	10347228	0.693689	3.14353
AT4G19630	Chr4	10683935	10684683	1.95808	4.17446
AT4G19940	Chr4	10806194	10807532	6.5044	7.9008
AT4G19950	Chr4	10809876	10811084	0.753053	2.59378
AT4G20210	Chr4	10913612	10918282	0.774752	3.61227
AT4G20220	Chr4	10918675	10922396	0.522091	2.15018
AT4G20240	Chr4	10931492	10934212	2.46769	5.95158
AT4G20250	Chr4	10937989	10940528	0.539969	1.0823
AT4G20990	Chr4	11219771	11221126	1.15272	2.50466
AT4G21000	Chr4	11222528	11223756	1.16271	4.7469
AT4G21030	Chr4	11231413	11231998	0.459807	4.16518
AT4G21040	Chr4	11234806	11235505	2.81154	7.47796
AT4G21830	Chr4	11584345	11585419	4.61354	4.91036
AT4G22060	Chr4	11687619	11689021	1.61237	6.50062
AT4G22070	Chr4	11691377	11694392	11.3161	11.3458
AT4G22105	Chr4	11710217	11710608	1.91441	4.25106
AT4G22110	Chr4	11711313	11714228	1.99211	5.49615
AT4G22115	Chr4	11714742	11715167	1.76522	4.62247
AT4G22160	Chr4	11733122	11734027	2.02423	3.44144
AT4G22400	Chr4	11816728	11817912	4.81036	7.94414
AT4G22540	Chr4	11860443	11866364	0.487695	0.616013
AT4G22680	Chr4	11922339	11924216	5.18349	8.00023
AT4G22800	Chr4	11978004	11983071	1.5254	3.11614
AT4G23080	Chr4	12096785	12098888	0.523176	2.77096
AT4G23350	Chr4	12197312	12199200	1.1169	2.32192
AT4G23360	Chr4	12200268	12204792	1.00651	3.1605
AT4G23370	Chr4	12206361	12213435	1.17148	5.45538
AT4G23380	Chr4	12214666	12216333	1.12526	7.42678
AT4G23390	Chr4	12217805	12219713	1.60285	7.1757
AT4G24540	Chr4	12670964	12674072	3.70106	5.39628
AT4G24550	Chr4	12675733	12679040	0.45339	0.475285
AT4G26250	Chr4	13289640	13291084	8.89178	9.96426
AT4G26260	Chr4	13297697	13300387	4.95402	6.65593
AT4G26330	Chr4	13320407	13323461	2.10512	2.57686
AT4G27420	Chr4	13712198	13714797	6.4502	12.5255
AT4G28930	Chr4	14271071	14271652	1.85817	5.05635
AT4G30420	Chr4	14877068	14878914	0.566647	2.13333
AT4G33790	Chr4	16204156	16207947	1.06144	5.39152
AT4G34580	Chr4	16515326	16519534	1.13649	4.11387
AT4G34770	Chr4	16591228	16591892	0.579294	3.55273
AT4G34780	Chr4	16592396	16592717	1.01103	6.14058
AT4G34790	Chr4	16594468	16595153	2.10661	3.55282
AT4G34800	Chr4	16596859	16597144	1.26399	4.75894
AT4G34810	Chr4	16599103	16599421	0.301565	1.05191
AT4G35170	Chr4	16736756	16738437	2.43777	3.10416
AT5G03570	Chr5	903755	906664	1.75158	3.36424
AT5G03600	Chr5	912806	914226	7.49181	10.3603
AT5G03840	Chr5	1024640	1025812	5.18681	7.0607
AT5G04280	Chr5	1192273	1195662	0.360487	0.496227
AT5G05060	Chr5	1493718	1495085	0.263583	5.05788
AT5G05070	Chr5	1496854	1498544	1.01949	1.93393
AT5G07225	Chr5	2268641	2270227	1.06785	2.02375
AT5G07230	Chr5	2270964	2271610	0.821037	2.04079
AT5G08141	Chr5	2619141	2619555	1.26398	4.46234
AT5G09976	Chr5	3119103	3119573	2.8875	3.50531
AT5G09978	Chr5	3120712	3121864	0.909881	2.16648
AT5G10220	Chr5	3206867	3208825	2.8737	3.09697
AT5G10230	Chr5	3209539	3211423	1.99257	2.72905
AT5G11180	Chr5	3557260	3561575	2.11117	2.64317
AT5G13825	Chr5	4464966	4466052	1.16748	1.92925
AT5G15140	Chr5	4908685	4910799	1.27423	7.20109
AT5G17330	Chr5	5711011	5715075	2.48513	4.69057
AT5G17340	Chr5	5715623	5716268	6.86339	14.2206
AT5G17440	Chr5	5749761	5753643	0.340694	0.457682
AT5G17650	Chr5	5816697	5818347	1.76355	4.08182
AT5G17810	Chr5	5880442	5884770	3.98177	6.28207
AT5G19270	Chr5	6485616	6487009	5.31202	6.44223
AT5G19560	Chr5	6603290	6606448	1.0497	1.71395
AT5G19710	Chr5	6664744	6666107	0.425442	2.47859
AT5G19720	Chr5	6667663	6668587	3.35159	7.23191
AT5G20710	Chr5	7010521	7014249	2.605	2.84181
AT5G22550	Chr5	7483869	7485482	1.40612	2.40573
AT5G22950	Chr5	7681304	7682903	0.340451	0.412079
AT5G22970	Chr5	7686252	7686837	1.37829	5.81035
AT5G23210	Chr5	7810682	7815039	2.97229	3.56952
AT5G23380	Chr5	7866741	7870302	0.401897	0.695479
AT5G23989	Chr5	8105232	8105325	1.72679	4.97458
AT5G23990	Chr5	8105564	8108590	5.87818	6.90341
AT5G24150	Chr5	8172315	8175431	2.76143	3.39378
AT5G24160	Chr5	8183074	8186640	2.84438	4.84507
AT5G24560	Chr5	8402204	8403266	5.35345	8.12686
AT5G24950	Chr5	8595208	8597761	1.9171	3.11349
AT5G25850	Chr5	9014081	9015917	3.45453	9.14015
AT5G25860	Chr5	9016907	9018424	4.82009	11.283
AT5G26080	Chr5	9107996	9108422	1.38222	8.3135
AT5G26090	Chr5	9109025	9113235	3.40656	9.01802
AT5G26110	Chr5	9117906	9119826	0.411425	1.25773
AT5G26114	Chr5	9120687	9120960	2.10143	7.2624
AT5G26260	Chr5	9200462	9202400	1.27095	3.90919
AT5G26320	Chr5	9238309	9241236	1.08765	2.69532
AT5G28510	Chr5	10481040	10484022	1.16331	3.1563
AT5G33340	Chr5	12594466	12595952	5.09191	6.74202
AT5G35760	Chr5	13934107	13934782	1.06665	4.32429
AT5G36100	Chr5	14191710	14194176	1.12955	4.15991
AT5G36110	Chr5	14195376	14197613	4.7059	8.05544
AT5G36925	Chr5	14565812	14566244	1.7738	2.34238
AT5G37180	Chr5	14718237	14722913	0.885465	2.59691
AT5G37810	Chr5	15045231	15047807	1.14818	4.87861
AT5G37820	Chr5	15050260	15051542	1.32719	5.04976
AT5G38350	Chr5	15328658	15331528	0.954855	2.4464
AT5G38420	Chr5	15380944	15382035	1.37018	2.5238
AT5G38960	Chr5	15592991	15593783	0.710949	3.61449
AT5G38970	Chr5	15594673	15597885	0.737561	1.45632
AT5G38990	Chr5	15608813	15611598	1.78938	1.88011
AT5G39000	Chr5	15611859	15614481	4.34695	6.6011
AT5G39010	Chr5	15615947	15616457	4.25938	5.75967
AT5G39024	Chr5	15619690	15619786	0.705307	1.2375
AT5G39030	Chr5	15620065	15622486	2.82512	3.72608
AT5G39220	Chr5	15705815	15708228	0.518171	1.53798
AT5G39260	Chr5	15726377	15727458	0.279617	1.4271
AT5G39270	Chr5	15729117	15730150	3.21551	4.90164
AT5G39280	Chr5	15730712	15731706	2.33765	3.58709
AT5G39430	Chr5	15775301	15777599	2.14666	5.45162
AT5G39440	Chr5	15781906	15784699	1.83943	5.19914
AT5G39450	Chr5	15785716	15787946	0.352936	0.360654
AT5G39630	Chr5	15868261	15869714	1.06069	4.14002
AT5G39850	Chr5	15950021	15951425	1.44948	1.61962
AT5G39910	Chr5	15979411	15981671	4.0934	5.3481
AT5G40310	Chr5	16113271	16115816	4.43519	7.48498
AT5G40320	Chr5	16121756	16123541	4.60888	7.16853
AT5G40380	Chr5	16151771	16155177	4.24204	5.14341
AT5G40382	Chr5	16155085	16155683	1.38918	4.74654
AT5G40420	Chr5	16173392	16174783	0.876799	1.34759
AT5G40430	Chr5	16176426	16177731	1.59527	4.14673
AT5G40630	Chr5	16271139	16272470	2.13853	4.3948
AT5G41500	Chr5	16604001	16605213	6.48348	12.2022
AT5G41510	Chr5	16607123	16608326	5.39349	8.26819
AT5G41630	Chr5	16650281	16651835	2.03738	7.35168
AT5G42210	Chr5	16866039	16870887	0.658438	1.21557
AT5G43110	Chr5	17309841	17311937	3.58784	7.61679
AT5G43200	Chr5	17346140	17346764	4.56814	8.38894
AT5G43300	Chr5	17376733	17379277	1.2126	2.69269
AT5G44020	Chr5	17712408	17714336	2.4549	3.96278
AT5G44350	Chr5	17864519	17865707	1.24763	1.97074
AT5G44550	Chr5	17941874	17943213	1.47568	3.03449
AT5G46010	Chr5	18660583	18661183	5.8833	8.944
AT5G46020	Chr5	18662845	18664874	0.410049	0.582877
AT5G46130	Chr5	18702913	18704484	2.81266	4.41799
AT5G46140	Chr5	18704996	18706708	2.51348	2.99176
AT5G46270	Chr5	18764348	18769090	0.57752	1.42131
AT5G46340	Chr5	18795925	18800094	0.387047	0.488181
AT5G46350	Chr5	18801217	18804043	6.55764	10.132
AT5G46810	Chr5	18991163	18993376	0.91657	2.82884
AT5G46820	Chr5	18993632	18996672	1.38611	3.59139
AT5G46871	Chr5	19018100	19018443	1.0469	2.63709
AT5G46873	Chr5	19021204	19021529	0.511986	2.84832
AT5G46874	Chr5	19022382	19022699	3.63521	5.93769
AT5G46900	Chr5	19039700	19040402	6.67453	9.70612
AT5G48110	Chr5	19501156	19504357	4.59235	6.69445
AT5G48550	Chr5	19678916	19680560	4.78814	7.96336
AT5G49334	Chr5	20003967	20004102	3.14589	8.42129
AT5G49800	Chr5	20234641	20236184	4.34508	4.90045
AT5G50060	Chr5	20362549	20363461	1.70314	3.67962
AT5G50070	Chr5	20364555	20365429	1.17648	1.70866
AT5G50460	Chr5	20551436	20552566	0.277616	0.373262
AT5G50490	Chr5	20560433	20561187	9.80568	13.4351
AT5G51000	Chr5	20742532	20743669	0.876698	4.73184
AT5G51470	Chr5	20907286	20909340	5.16489	6.07251
AT5G51780	Chr5	21034822	21036773	5.70134	8.68491
AT5G51795	Chr5	21043082	21044194	0.692854	2.67421
AT5G52120	Chr5	21176421	21180310	0.58946	1.88103
AT5G52130	Chr5	21182467	21183875	1.04167	5.37267
AT5G52140	Chr5	21184521	21186872	0.891805	4.76256
AT5G52340	Chr5	21250801	21253939	1.02539	1.80952
AT5G52350	Chr5	21254910	21257618	1.61822	2.37306
AT5G52760	Chr5	21386823	21387703	1.02518	3.93143
AT5G53592	Chr5	21773687	21774927	2.59871	4.70022
AT5G53620	Chr5	21780946	21785230	0.418915	0.641078
AT5G53635	Chr5	21785998	21787444	4.02096	7.34804
AT5G53730	Chr5	21807973	21808810	2.77485	6.55763
AT5G53740	Chr5	21811632	21814908	0.608321	1.586
AT5G54040	Chr5	21928846	21930637	5.53347	7.40419
AT5G54145	Chr5	21972464	21973083	1.92575	3.0928
AT5G54320	Chr5	22062804	22063914	3.0752	5.48615
AT5G54480	Chr5	22118003	22120166	2.64835	4.82425
AT5G55856	Chr5	22607926	22608640	3.01597	3.68418
AT5G56369	Chr5	22835445	22835823	0.971841	8.45693
AT5G56370	Chr5	22835981	22837941	2.30354	12.4229
AT5G56380	Chr5	22838671	22841015	0.282205	1.15054
AT5G56470	Chr5	22869059	22869958	4.6881	9.63608
AT5G57620	Chr5	23334816	23336566	8.57733	10.7508
AT5G59110	Chr5	23863529	23864048	2.25253	4.46878
AT5G59370	Chr5	23949738	23951837	2.04129	3.59665
AT5G60980	Chr5	24543359	24546269	0.236212	0.265581
AT5G61630	Chr5	24773656	24774502	4.4688	6.47596
AT5G61640	Chr5	24775034	24776390	0.304394	0.592013
AT5G61650	Chr5	24778245	24779098	0.540112	1.01931
AT5G61660	Chr5	24779214	24779930	1.82958	2.76118
AT5G62110	Chr5	24942168	24946081	0.300807	0.808524
AT5G62120	Chr5	24946954	24948225	1.26761	2.50349
AT5G62470	Chr5	25078990	25081101	3.81815	7.64537
AT5G63580	Chr5	25454729	25456476	3.76211	6.66717
AT5G63740	Chr5	25510775	25511456	1.59944	3.71558
AT5G64780	Chr5	25900558	25902127	0.738709	2.96938
AT5G66810	Chr5	26672925	26676613	0.463909	0.554947
