# Supplementary material for: Polycomb-dependent differential chromatin compartmentalization determines gene coregulation in Arabidopsis
Source: HighWire-hosted journal article supplement (doi:10.1101/gr.273771.120), 2021-06-03
Supplement: Supplemental_Table_S20.xlsx [file Supplemental_Table_S20.xlsx]

## Sheet: Col0_vs_clf_DEGs
Supplementary Table S20: Differentially expressed genes spanning Col0_vs_clf loops
InteractionID	Gene1	Chr1	Start	End	Gene2	Gene2	Gene2_Chr	Gene2_Start	Gene2_End	LFC_1	pval_1	LFC_2	pval_2
interaction85419	AT2G43540	Chr2	18072370	18072963	AT2G43535	AT2G01008	Chr2	1024	2810	0.612198	0.00106388	0.909007	9.98e-11			LFC_1>0	LFC_1<0
interaction115097	AT3G49270	Chr3	18267251	18268271	AT3G49260	AT5G20100	Chr5	6790055	6790725	6.44002	0.00494222	-0.439155	0.00431004		LFC_2>0	184	43
interaction106086	AT3G25770	Chr3	9406872	9407955	AT3G25760	AT2G43535	Chr2	18070972	18071676	1.36574	2.54e-37	1.53125	6.62e-29		LFC_2<0	42	30
interaction124755	AT3G62750	Chr3	23214370	23217045	AT3G62740	AT1G57540	Chr1	21310328	21311502	-0.336491	0.0156128	0.75946	0.000113182
interaction97918	AT3G16430	Chr3	5581662	5583187	AT3G16420	AT2G01010	Chr2	3705	5513	0.624021	0.000234038	0.549818	2.42e-06		X2 (3, N = 299) = 214.297, p = 4.33e-7
interaction171107	AT5G23830	Chr5	8033737	8034930	AT5G23820	AT2G35620	Chr2	14960939	14965497	0.838758	7.64e-07	0.463274	0.00050182
interaction54701	AT1G75730	Chr1	28435705	28439769	AT1G75710	AT3G22690	Chr3	8021228	8024534	0.441515	0.015212	-0.360558	0.0219863
interaction198408	AT5G67180	Chr5	26801948	26804249	AT5G67160	AT3G19610	Chr3	6812492	6814719	-0.618596	0.00631521	-0.609826	0.0361456
interaction17631	AT1G26390	Chr1	9130016	9131779	AT1G26380	AT3G02790	Chr3	604844	605421	-2.32289	0.000114801	-1.51838	0.030148
interaction72607	AT2G29450	Chr2	12624585	12625637	AT2G29440	AT4G16740	Chr4	9407767	9410877	0.565233	7.69e-07	0.495431	0.0420538
interaction18109	AT1G27130	Chr1	9425459	9426886	AT1G27120	AT3G49260	Chr3	18262398	18266021	0.449537	0.00238139	-0.602481	0.000575271
interaction69290	AT2G25790	Chr2	11000598	11004235	AT2G25770	AT5G56795	Chr5	22972041	22972449	-0.342617	0.0393404	2.26751	3.92e-06
interaction140089	AT4G19530	Chr4	10651743	10657282	AT4G19520	AT5G05240	Chr5	1553813	1556556	0.711296	9.43e-05	2.03633	0.000319624
interaction175127	AT5G36925	Chr5	14565812	14566244	AT5G36910	AT4G16770	Chr4	9434392	9437172	1.49533	0.000102928	0.526687	0.0113631
interaction188057	AT5G51795	Chr5	21043082	21044194	AT5G51780	AT1G67400	Chr1	25247987	25250734	1.29032	8.91e-08	0.967432	3.45e-09
interaction65777	AT2G20580	Chr2	8858987	8864865	AT2G20570	AT2G26975	Chr2	11512860	11513553	-0.319364	0.0207915	-0.655732	0.00010248
interaction54744	AT1G75770	Chr1	28449989	28451108	AT1G75730	AT2G38180	Chr2	15997113	15998906	0.618467	0.0236023	0.441515	0.015212
interaction15487	AT1G22570	Chr1	7976619	7978573	AT1G22550	AT5G54520	Chr5	22146513	22149120	2.15438	1.41e-11	0.867089	3.73e-06
interaction149779	AT4G31870	Chr4	15410204	15411617	AT4G31860	AT5G39630	Chr5	15868261	15869714	0.641802	3.14e-06	0.350509	0.0358776
interaction56742	AT1G78476	Chr1	29523981	29526284	AT1G78460	AT2G38860	Chr2	16233314	16235235	1.2778	4.81e-05	0.780367	8.68e-05
interaction106179	AT3G25780	Chr3	9409289	9410567	AT3G25770	AT2G32190	Chr2	13674497	13675286	1.02259	1.53e-08	1.36574	2.54e-37
interaction55779	AT1G77530	Chr1	29136036	29137555	AT1G77520	AT5G58660	Chr5	23701466	23703988	1.44534	2.34e-09	0.901649	0.00100696
interaction14977	AT1G22150	Chr1	7818360	7821344	AT1G22140	AT3G08690	Chr3	2641055	2642688	-1.28967	0.00632288	0.547928	0.000199229
interaction85398	AT2G43535	Chr2	18070972	18071676	AT2G43530	AT3G58490	Chr3	21632811	21635106	0.909007	9.98e-11	2.13826	4.54e-44
interaction6761	AT1G11080	Chr1	3694671	3698013	AT1G11070	AT3G09405	Chr3	2894811	2897674	0.606509	0.000362246	0.879195	0.0411726
interaction52159	AT1G72430	Chr1	27264910	27265630	AT1G72416	AT1G02930	Chr1	661176	662456	0.797648	0.00223754	1.41296	6.83e-06
interaction25261	AT1G35580	Chr1	13122203	13125264	AT1G35560	AT2G43261	Chr2	17985246	17986775	0.491812	0.000985995	-0.434566	0.0116028
interaction66832	AT2G22250	Chr2	9457809	9460919	AT2G22190	AT5G41090	Chr5	16445763	16446537	-0.334449	0.0296498	-0.962821	1.36e-05
interaction139912	AT4G19420	Chr4	10587165	10590588	AT4G19410	AT1G13690	Chr1	4693288	4694410	1.09039	5.98e-08	0.424784	0.000536253
interaction67295	AT2G22980	Chr2	9778876	9783251	AT2G22970	AT3G50390	Chr3	18702073	18703619	1.20763	2.05e-12	0.571514	0.00130603
interaction58015	AT1G80120	Chr1	30139100	30140204	AT1G80110	AT4G35589	Chr4	16892765	16892903	0.931957	0.000396874	0.948892	0.00729539
interaction103228	AT3G22800	Chr3	8062887	8064556	AT3G22790	AT4G29970	Chr4	14662764	14663917	0.822425	4.25e-05	-0.489497	0.0103911
interaction116241	AT3G50480	Chr3	18733067	18734388	AT3G50470	AT2G16240	Chr2	7039093	7039165	0.699308	0.0259869	1.55499	0.000988383
interaction58771	AT2G01530	Chr2	239704	240520	AT2G01520	AT1G20580	Chr1	7128883	7130642	1.13719	9.14e-09	1.02174	6.37e-08
interaction171166	AT5G23840	Chr5	8035766	8036982	AT5G23830	AT5G39210	Chr5	15703120	15704104	1.65147	3.12e-06	0.838758	7.64e-07
interaction22137	AT1G31550	Chr1	11295524	11297379	AT1G31540	AT4G33780	Chr4	16201830	16203641	0.867874	0.000118391	1.21034	8.2e-10
interaction98089	AT3G16690	Chr3	5684358	5686490	AT3G16670	AT1G35880	Chr1	13339850	13341228	1.4642	8.35e-15	-1.71178	7.31e-18
interaction183073	AT5G44980	Chr5	18160289	18162264	AT5G44973	AT3G28080	Chr3	10451485	10455267	1.21503	0.0267183	2.14859	0.00460318
interaction188078	AT5G51795	Chr5	21043082	21044194	AT5G51790	AT1G22320	Chr1	7884416	7884454	1.29032	8.91e-08	1.62418	3.2e-07
interaction86821	AT2G45650	Chr2	18804349	18806522	AT2G45640	AT4G01935	Chr4	841056	842364	2.6073	0.00741611	0.344496	0.0392927
interaction50072	AT1G69900	Chr1	26326380	26327831	AT1G69890	AT1G49960	Chr1	18498638	18501886	1.29195	1.26e-05	2.40016	2.02e-28
interaction23475	AT1G33600	Chr1	12180775	12182363	AT1G33560	AT1G59960	Chr1	22071291	22073147	0.621465	0.000297416	0.400905	0.04925
interaction139490	AT4G18970	Chr4	10388721	10390991	AT4G18950	AT4G03600	Chr4	1603701	1604508	-0.380699	0.0340162	0.509313	0.0255981
interaction171156	AT5G23840	Chr5	8035766	8036982	AT5G23810	AT5G61350	Chr5	24667972	24670501	1.65147	3.12e-06	0.74397	0.0300954
interaction33232	AT1G54030	Chr1	20167628	20169600	AT1G54010	AT1G63855	Chr1	23699368	23700967	0.37077	0.00943251	0.449591	0.000265788
interaction89286	AT3G01680	Chr3	251980	255513	AT3G01670	AT1G11550	Chr1	3881528	3881608	-0.567291	0.00213244	-0.672386	0.00218436
interaction84298	AT2G42200	Chr2	17587406	17589630	AT2G42190	AT3G52180	Chr3	19349651	19353596	-1.02747	0.00233089	0.354883	0.019377
interaction97076	AT3G14940	Chr3	5025237	5029710	AT3G14930	AT5G66780	Chr5	26663572	26664403	-0.379405	0.0188943	-0.393015	0.00982304
interaction191641	AT5G56250	Chr5	22768576	22772896	AT5G56240	AT5G48610	Chr5	19711541	19715910	0.996445	6.15e-13	0.552392	0.000173424
interaction136083	AT4G15440	Chr4	8835494	8838676	AT4G15430	AT1G61470	Chr1	22678184	22679021	0.713754	0.0299135	-0.571675	0.00299076
interaction154319	AT4G37980	Chr4	17852440	17854500	AT4G37940	AT1G61070	Chr1	22491732	22492542	0.486648	1.76e-05	1.01824	0.00098937
interaction153388	AT4G37320	Chr4	17559579	17561727	AT4G37300	AT3G60420	Chr3	22334423	22337617	-0.511258	0.00586258	0.440885	0.0363696
interaction195399	AT5G61640	Chr5	24775034	24776390	AT5G61570	AT3G18500	Chr3	6352476	6355442	0.683597	0.000175902	0.689574	0.000780295
interaction15986	AT1G23230	Chr1	8244439	8251795	AT1G23205	AT5G09976	Chr5	3119103	3119573	-0.348401	0.0459989	-0.503867	0.0157288
interaction3636	AT1G05690	Chr1	1707010	1709347	AT1G05675	AT1G29430	Chr1	10302649	10303335	-0.524903	0.00914402	1.7105	0.00375379
interaction190175	AT5G54145	Chr5	21972464	21973083	AT5G54130	AT1G14180	Chr1	4847161	4849207	0.712938	0.000196776	-1.15519	2.21e-09
interaction30980	AT1G52030	Chr1	19345939	19349088	AT1G52000	AT4G16670	Chr4	9385218	9387754	0.462599	0.0487774	0.321571	0.0170944
interaction176208	AT5G38030	Chr5	15171245	15175457	AT5G38020	AT1G08985	Chr1	2887284	2887706	0.387675	0.00623842	0.687119	8.35e-06
interaction85377	AT2G43530	Chr2	18070055	18070718	AT2G43510	AT5G09440	Chr5	2938346	2939461	2.13826	4.54e-44	0.749543	0.0174866
interaction161983	AT5G10140	Chr5	3173496	3179448	AT5G10120	AT2G47200	Chr2	19377728	19378331	2.15092	2.26e-45	1.6095	0.0037031
interaction4413	AT1G06640	Chr1	2032337	2034018	AT1G06620	AT1G01560	Chr1	202135	204335	0.359273	0.0134375	1.29193	2.43e-13
interaction52733	AT1G73340	Chr1	27573115	27575419	AT1G73330	AT1G20110	Chr1	6971484	6974835	0.919864	0.00287055	0.69652	0.000198666
interaction33227	AT1G54030	Chr1	20167628	20169600	AT1G54020	AT1G20180	Chr1	6996209	6997943	0.37077	0.00943251	1.88784	2.79e-06
interaction164851	AT5G14930	Chr5	4828639	4830955	AT5G14920	AT3G59845	Chr3	22106242	22107924	0.541219	0.016059	0.461654	0.0404728
interaction43902	AT1G65510	Chr1	24359452	24360081	AT1G65490	AT1G22380	Chr1	7900386	7902332	0.872973	0.000306457	0.587785	1.13e-05
interaction94981	AT3G11110	Chr3	3479978	3480455	AT3G11090	AT1G05030	Chr1	1438151	1441417	0.678171	0.0347759	-0.471709	0.0168975
interaction50903	AT1G70890	Chr1	26725625	26726544	AT1G70880	AT4G16745	Chr4	9411839	9414897	0.336892	0.0331632	0.910265	0.0197513
interaction160338	AT5G07350	Chr5	2320020	2325419	AT5G07330	AT1G69800	Chr1	26274229	26276329	-0.309476	0.0225477	1.94299	1.66e-07
interaction98000	AT3G16450	Chr3	5588393	5590055	AT3G16420	AT5G40420	Chr5	16173392	16174783	0.721505	1.85e-05	0.549818	2.42e-06
interaction52710	AT1G73300	Chr1	27559672	27562048	AT1G73280	AT4G33450	Chr4	16095391	16096610	2.08805	6.19e-09	0.563586	0.0333874
interaction198033	AT5G66780	Chr5	26663572	26664403	AT5G66770	AT2G22145	Chr2	9420319	9420589	2.3353	0.045123	-0.634249	0.00134833
interaction54729	AT1G75750	Chr1	28441525	28442429	AT1G75730	AT3G11100	Chr3	3476186	3477405	0.820168	4.1e-06	0.441515	0.015212
interaction120162	AT3G55890	Chr3	20740816	20742002	AT3G55880	AT1G75050	Chr1	28180115	28181062	0.807152	0.0182214	0.655783	0.0042441
interaction80144	AT2G37130	Chr2	15597920	15600077	AT2G37100	AT1G79870	Chr1	30044745	30046027	0.554281	0.00195571	-0.795364	0.00329722
interaction53456	AT1G74450	Chr1	27982508	27984280	AT1G74430	AT5G36920	Chr5	14564391	14564971	0.5176	0.00555619	1.35744	4.4e-09
interaction72567	AT2G29440	Chr2	12620059	12621148	AT2G29420	AT3G25760	Chr3	9403882	9405250	0.495431	0.0420538	0.374591	0.0258961
interaction93346	AT3G09270	Chr3	2848288	2849289	AT3G09260	AT1G30050	Chr1	10543021	10544591	0.505129	0.000584341	0.530812	1.73e-06
interaction118928	AT3G53990	Chr3	19989336	19991134	AT3G53960	AT3G48980	Chr3	18155415	18158417	0.495729	0.0117086	0.8467	0.000862281
interaction33198	AT1G54020	Chr1	20161669	20163748	AT1G54010	AT4G04620	Chr4	2328448	2330200	1.88784	2.79e-06	0.449591	0.000265788
interaction136436	AT4G15700	Chr4	8937392	8937892	AT4G15690	AT3G10700	Chr3	3346577	3351023	1.35035	0.00576997	1.09733	0.00150291
interaction58738	AT2G01520	Chr2	235924	237147	AT2G01505	AT4G02760	Chr4	1223958	1228941	1.02174	6.37e-08	-0.741923	0.0200637
interaction27217	AT1G48100	Chr1	17766873	17769951	AT1G48090	AT2G34990	Chr2	14750259	14751168	-1.40408	4.08e-11	-0.436738	0.0109939
interaction82	AT1G01080	Chr1	45295	47019	AT1G01060	AT1G79050	Chr1	29736958	29740179	-0.312187	0.047167	-0.29198	0.0403535
interaction64450	AT2G18550	Chr2	8049662	8051213	AT2G18540	AT5G10340	Chr5	3253121	3255045	1.27457	0.0267183	1.84328	1.87e-17
interaction20580	AT1G29720	Chr1	10393796	10399873	AT1G29690	AT2G01008	Chr2	1024	2810	-0.40637	0.0449708	0.818498	2.64e-06
interaction1837	AT1G03457	Chr1	860787	864125	AT1G03445	AT1G73100	Chr1	27491183	27494182	0.774033	0.000148202	0.919852	0.0280036
interaction103944	AT3G23580	Chr3	8460044	8462815	AT3G23550	AT5G45250	Chr5	18321913	18326022	0.363187	0.0281698	1.94095	3.39e-05
interaction90278	AT3G03470	Chr3	824551	826437	AT3G03450	AT1G22440	Chr1	7922427	7924944	0.833056	0.000198069	-0.66748	0.0117356
interaction58907	AT2G01890	Chr2	396767	399208	AT2G01880	AT5G14730	Chr5	4756217	4757657	0.388236	0.0130411	0.708598	0.0044764
interaction14414	AT1G21440	Chr1	7502158	7504175	AT1G21400	AT4G18790	Chr4	10317784	10319660	-0.530629	0.0265111	0.59145	0.0128884
interaction195422	AT5G61640	Chr5	24775034	24776390	AT5G61590	AT3G24160	Chr3	8726121	8729389	0.683597	0.000175902	1.37368	0.00750996
interaction126083	AT4G01330	Chr4	550348	553016	AT4G01250	AT1G06800	Chr1	2089416	2091686	0.803654	0.000212398	0.852834	0.0048077
interaction77882	AT2G34650	Chr2	14589759	14591788	AT2G34640	AT2G41473	Chr2	17294452	17294728	-0.658399	0.0182988	-0.313533	0.0429702
interaction49809	AT1G69790	Chr1	26266608	26269013	AT1G69770	AT2G29600	Chr2	12655150	12657296	0.538666	0.0451625	-0.39323	0.0109395
interaction186615	AT5G49810	Chr5	20239342	20246380	AT5G49780	AT3G62060	Chr3	22979954	22982944	-0.289196	0.0372012	1.02294	0.00977465
interaction59710	AT2G03550	Chr2	1077035	1078083	AT2G03530	AT2G43210	Chr2	17960699	17963727	0.289145	0.0480903	0.612564	0.0179656
interaction52787	AT1G73370	Chr1	27584424	27588464	AT1G73340	AT3G61560	Chr3	22777828	22780191	-0.723302	0.00121119	0.919864	0.00287055
interaction140870	AT4G20270	Chr4	10949660	10953083	AT4G20260	AT3G61910	Chr3	22929005	22930442	-0.539048	0.000190245	0.846679	6.26e-06
interaction52289	AT1G72810	Chr1	27398590	27400417	AT1G72790	AT2G27370	Chr2	11708449	11710004	-0.486013	0.00169258	1.43856	3.55e-17
interaction71878	AT2G28960	Chr2	12437913	12442347	AT2G28950	AT4G02235	Chr4	980954	981711	0.948487	6.28e-07	-0.589524	3.03e-07
interaction198590	AT5G67300	Chr5	26854021	26856006	AT5G67280	AT3G56800	Chr3	21034536	21036077	1.36588	2.54e-10	-0.786767	2.26e-05
interaction38893	AT1G61080	Chr1	22493193	22497019	AT1G61065	AT5G49800	Chr5	20234641	20236184	0.837512	0.0397181	0.887923	0.00150291
interaction2296	AT1G03870	Chr1	982505	983540	AT1G03850	AT3G25750	Chr3	9400954	9402088	0.862633	0.000297416	0.912495	1.54e-06
interaction79978	AT2G36900	Chr2	15491039	15492822	AT2G36870	AT3G21610	Chr3	7609142	7610717	0.423918	0.0338191	-0.613363	4.93e-07
interaction79057	AT2G35980	Chr2	15110587	15111471	AT2G35930	AT5G06290	Chr5	1919212	1921425	1.25234	0.00295997	0.99251	1.41e-05
interaction171088	AT5G23830	Chr5	8033737	8034930	AT5G23810	AT1G75410	Chr1	28299791	28302603	0.838758	7.64e-07	0.74397	0.0300954
interaction164008	AT5G13080	Chr5	4149739	4151150	AT5G13060	AT3G23850	Chr3	8615563	8616533	0.916959	0.00659821	-0.703248	0.0217888
interaction187214	AT5G50915	Chr5	20710208	20712315	AT5G50900	AT5G53530	Chr5	21746034	21748595	0.898566	2.39e-08	0.469647	0.00112718
interaction85486	AT2G43590	Chr2	18081330	18082767	AT2G43530	AT4G21000	Chr4	11222528	11223756	-0.984811	1.3e-09	2.13826	4.54e-44
interaction56774	AT1G78476	Chr1	29523981	29526284	AT1G78450	AT1G54000	Chr1	20154168	20156419	1.2778	4.81e-05	1.78021	3.19e-16
interaction188004	AT5G51790	Chr5	21039761	21040594	AT5G51780	AT5G02200	Chr5	437459	438894	1.62418	3.2e-07	0.967432	3.45e-09
interaction188170	AT5G51820	Chr5	21063367	21068057	AT5G51795	AT2G45840	Chr2	18869260	18871561	-0.369998	0.0398106	1.29032	8.91e-08
interaction84246	AT2G42190	Chr2	17582868	17584194	AT2G42170	AT2G41130	Chr2	17143293	17144949	0.354883	0.019377	1.08483	0.000131579
interaction63940	AT2G18196	Chr2	7920507	7922326	AT2G18193	AT5G17650	Chr5	5816697	5818347	0.706018	0.00164519	-0.805386	0.000516194
interaction32203	AT1G53180	Chr1	19831440	19832895	AT1G53170	AT5G63670	Chr5	25487926	25489428	0.45792	0.0215557	-0.397205	0.0316355
interaction143347	AT4G23020	Chr4	12066172	12068538	AT4G23010	AT5G09490	Chr5	2952215	2953245	-0.658708	0.00251898	0.336042	0.0446929
interaction80417	AT2G37770	Chr2	15834866	15837001	AT2G37750	AT3G09320	Chr3	2861742	2864245	0.760188	0.000120954	1.05143	8.46e-07
interaction91855	AT3G06390	Chr3	1938731	1939779	AT3G06380	AT2G03550	Chr2	1077035	1078083	0.716942	0.0240356	0.460073	0.00192367
interaction184379	AT5G46290	Chr5	18774085	18776742	AT5G46280	AT1G02500	Chr1	518250	520437	-0.294721	0.0359571	-0.588259	0.00122221
interaction158321	AT5G05250	Chr5	1557036	1557998	AT5G05230	AT4G37510	Chr4	17626103	17628947	-0.587958	0.0134934	0.337553	0.0433598
interaction55463	AT1G77220	Chr1	29012716	29015803	AT1G77210	AT5G38410	Chr5	15377172	15378416	0.351173	0.0493518	0.943181	0.000784334
interaction9819	AT1G14200	Chr1	4854383	4855200	AT1G14185	AT3G01329	Chr3	118872	119178	-0.425058	0.0429418	0.520362	0.0487829
interaction157448	AT5G04040	Chr5	1089341	1093179	AT5G04010	AT1G62620	Chr1	23182643	23184991	0.539786	0.00539656	3.23268	0.0229745
interaction192565	AT5G56870	Chr5	23004195	23008649	AT5G56850	AT4G01935	Chr4	841056	842364	1.38382	2.93e-09	-0.324918	0.0410468
interaction24435	AT1G34460	Chr1	12595109	12599628	AT1G34430	AT2G17420	Chr2	7564344	7566539	0.738978	0.0364161	-0.288459	0.0318131
interaction103953	AT3G23580	Chr3	8460044	8462815	AT3G23560	AT4G03610	Chr4	1604938	1606982	0.363187	0.0281698	0.481296	0.00194154
interaction77252	AT2G34010	Chr2	14368855	14370438	AT2G34000	AT4G16560	Chr4	9324745	9328628	1.19926	0.000118391	1.89552	0.00686184
interaction135031	AT4G14630	Chr4	8392840	8393813	AT4G14615	AT1G11360	Chr1	3821442	3823088	-1.34392	0.000169123	0.366357	0.0422584
interaction119632	AT3G55160	Chr3	20445411	20452400	AT3G55130	AT3G53690	Chr3	19898787	19900065	-0.43962	0.0170944	-0.470493	0.00598574
interaction106169	AT3G25780	Chr3	9409289	9410567	AT3G25760	AT4G05110	Chr4	2626404	2628830	1.02259	1.53e-08	1.53125	6.62e-29
interaction43706	AT1G65390	Chr1	24292477	24294631	AT1G65370	AT2G41090	Chr2	17135720	17136852	1.16678	0.0239454	1.13554	4.6e-16
interaction159029	AT5G05965	Chr5	1790787	1792634	AT5G05930	AT1G67760	Chr1	25405579	25406372	2.15968	0.00131294	0.591297	0.000518029
interaction165996	AT5G17650	Chr5	5816697	5818347	AT5G17640	AT1G21395	Chr1	7491964	7492339	0.438702	0.0175168	0.488323	0.00189564
interaction48551	AT1G68580	Chr1	25752734	25756076	AT1G68570	AT4G37060	Chr4	17461365	17463734	0.658484	6.9e-09	-0.603025	5.91e-07
interaction129836	AT4G08870	Chr4	5646438	5648727	AT4G08850	AT5G55630	Chr5	22531357	22533122	0.981898	1.45e-24	0.495282	0.02384
interaction59931	AT2G03730	Chr2	1137610	1140186	AT2G03710	AT3G13730	Chr3	4497975	4500920	0.391237	0.0339677	1.223	1.01e-15
interaction1263	AT1G02650	Chr1	568703	570418	AT1G02640	AT5G48545	Chr5	19676116	19678109	1.30744	0.00294375	1.10696	0.0377967
interaction67061	AT2G22770	Chr2	9684724	9686595	AT2G22760	AT3G56390	Chr3	20907353	20907697	1.17798	1.48e-17	4.14641	2.24e-09
interaction176111	AT5G38010	Chr5	15158274	15160212	AT5G38005	AT1G22360	Chr1	7894857	7897591	0.736279	3.12e-05	1.88431	1.26e-15
interaction67026	AT2G22760	Chr2	9677879	9679364	AT2G22750	AT2G01190	Chr2	114974	117640	4.14641	2.24e-09	3.98094	8.86e-09
interaction3632	AT1G05690	Chr1	1707010	1709347	AT1G05680	AT3G15356	Chr3	5174401	5175469	-0.524903	0.00914402	1.06035	1.23e-09
interaction15601	AT1G22600	Chr1	7987140	7989217	AT1G22570	AT4G00710	Chr4	290047	293453	1.55239	0.00308864	2.15438	1.41e-11
interaction50812	AT1G70880	Chr1	26722880	26723778	AT1G70830	AT2G45560	Chr2	18776051	18778510	0.910265	0.0197513	0.308582	0.0317977
interaction144029	AT4G23290	Chr4	12177737	12180826	AT4G23270	AT2G34690	Chr2	14630306	14632061	-0.395909	0.00670432	0.527552	0.0135127
interaction101075	AT3G21380	Chr3	7528183	7530677	AT3G21370	AT5G02080	Chr5	409810	411557	2.18083	1.49e-13	2.1566	1.63e-21
interaction139446	AT4G18960	Chr4	10382855	10388539	AT4G18950	AT5G41440	Chr5	16587234	16587609	9.15593	2.66e-24	0.509313	0.0255981
interaction83578	AT2G41650	Chr2	17363906	17364434	AT2G41640	AT3G25740	Chr3	9397785	9399762	0.497163	0.000153447	1.31916	4.59e-09
interaction177665	AT5G39030	Chr5	15620065	15622486	AT5G39020	AT1G32080	Chr1	11537341	11539800	0.509484	0.0330476	0.988783	0.00629948
interaction119574	AT3G55130	Chr3	20433877	20436390	AT3G55110	AT5G27570	Chr5	9734895	9736131	-0.470493	0.00598574	-0.845991	0.00804809
interaction72680	AT2G29490	Chr2	12631377	12632473	AT2G29440	AT5G44490	Chr5	17924034	17925843	0.529327	0.00874242	0.495431	0.0420538
interaction181892	AT5G44020	Chr5	17712408	17714336	AT5G44005	AT3G62740	Chr3	23211415	23213888	0.874353	0.00035248	0.60142	0.00350326
interaction77642	AT2G34355	Chr2	14496327	14498389	AT2G34350	AT5G40270	Chr5	16093171	16097232	0.63286	0.00482734	1.28466	0.0241021
interaction85393	AT2G43535	Chr2	18070972	18071676	AT2G43510	AT5G49190	Chr5	19943281	19947189	0.909007	9.98e-11	0.749543	0.0174866
interaction161836	AT5G09978	Chr5	3120712	3121864	AT5G09960	AT2G26730	Chr2	11388406	11391641	0.698148	0.0119652	0.451215	0.0287012
interaction50915	AT1G70890	Chr1	26725625	26726544	AT1G70850	AT4G19710	Chr4	10724854	10729768	0.336892	0.0331632	0.605691	0.000142053
interaction185413	AT5G48000	Chr5	19444137	19447850	AT5G47990	AT5G67250	Chr5	26831372	26833333	0.755664	1.26e-06	0.682069	0.00499146
interaction30983	AT1G52050	Chr1	19354918	19356764	AT1G52040	AT5G45680	Chr5	18530879	18532337	1.21518	0.00345383	1.12625	0.00167225
interaction171086	AT5G23820	Chr5	8031267	8033020	AT5G23810	AT1G71130	Chr1	26822787	26823530	0.463274	0.00050182	0.74397	0.0300954
interaction32143	AT1G53170	Chr1	19821336	19822252	AT1G53160	AT4G35590	Chr4	16892908	16894865	-0.397205	0.0316355	1.19215	1.02e-06
interaction23499	AT1G33610	Chr1	12188909	12190418	AT1G33600	AT5G36925	Chr5	14565812	14566244	1.19667	2.04e-05	0.621465	0.000297416
interaction15914	AT1G23205	Chr1	8233996	8234893	AT1G23190	AT4G13210	Chr4	7669947	7673376	-0.503867	0.0157288	-0.370731	0.00243956
interaction90300	AT3G03480	Chr3	828295	829896	AT3G03470	AT2G39681	Chr2	16539383	16540417	1.2293	0.0117954	0.833056	0.000198069
interaction110147	AT3G44326	Chr3	16000878	16002118	AT3G44320	AT4G32340	Chr4	15612583	15614305	1.01591	3.26e-05	0.331158	0.0392927
interaction182005	AT5G44060	Chr5	17731004	17731905	AT5G44050	AT2G45540	Chr2	18757488	18772831	0.417814	0.0181178	0.621952	2.37e-05
interaction98050	AT3G16460	Chr3	5592581	5595717	AT3G16450	AT5G10340	Chr5	3253121	3255045	0.643574	0.000518284	0.721505	1.85e-05
interaction35695	AT1G56520	Chr1	21174663	21178974	AT1G56510	AT1G61470	Chr1	22678184	22679021	0.590024	0.0370245	1.00668	1.43e-10
interaction162564	AT5G10690	Chr5	3374392	3377451	AT5G10625	AT1G02810	Chr1	618264	620480	-0.330261	0.0391266	0.976918	6.68e-05
interaction11037	AT1G16130	Chr1	5525490	5528212	AT1G16110	AT1G49980	Chr1	18507970	18513172	1.03639	0.00973154	0.857409	0.00223728
interaction101145	AT3G21460	Chr3	7557383	7557958	AT3G21420	AT1G44750	Chr1	16892638	16895465	1.09592	0.00126538	1.04759	4.38e-08
interaction72488	AT2G29330	Chr2	12594589	12596330	AT2G29300	AT3G10595	Chr3	3311784	3312831	0.890736	0.00163742	0.82087	0.00011988
interaction124710	AT3G62740	Chr3	23211415	23213888	AT3G62720	AT4G25990	Chr4	13191689	13193543	0.75946	0.000113182	1.29915	1.25e-09
interaction81887	AT2G40140	Chr2	16772072	16774657	AT2G40130	AT1G49790	Chr1	18435350	18437068	-0.811777	1.66e-07	-1.11274	0.00156141
interaction135263	AT4G14960	Chr4	8548491	8550453	AT4G14930	AT1G02390	Chr1	480851	483292	-0.349518	0.00304251	0.532893	7.46e-05
interaction51928	AT1G72140	Chr1	27141813	27144490	AT1G72120	AT1G63420	Chr1	23515873	23518910	0.607287	0.0060527	0.689442	0.00229323
interaction142742	AT4G22200	Chr4	11746512	11750698	AT4G22160	AT4G35150	Chr4	16726947	16728531	-0.605482	2.39e-06	0.478209	0.0365443
interaction176200	AT5G38030	Chr5	15171245	15175457	AT5G38010	AT2G02990	Chr2	873505	874811	0.387675	0.00623842	0.736279	3.12e-05
interaction176201	AT5G38030	Chr5	15171245	15175457	AT5G38010	AT1G50954	Chr1	18886532	18886628	0.387675	0.00623842	0.736279	3.12e-05
interaction196352	AT5G63670	Chr5	25487926	25489428	AT5G63580	AT1G53710	Chr1	20053160	20056396	0.331658	0.0435354	0.9069	0.0318131
interaction52721	AT1G73340	Chr1	27573115	27575419	AT1G73280	AT3G01327	Chr3	116230	116548	0.919864	0.00287055	0.563586	0.0333874
interaction75748	AT2G32460	Chr2	13782207	13784471	AT2G32450	AT5G06770	Chr5	2090702	2092950	1.84959	0.00101553	0.403642	0.0285633
interaction67427	AT2G23130	Chr2	9844298	9845385	AT2G23110	AT3G43430	Chr3	15354534	15355304	1.09667	2.16e-06	2.57668	1.15e-08
interaction171179	AT5G23840	Chr5	8035766	8036982	AT5G23820	AT1G62520	Chr1	23144411	23145509	1.65147	3.12e-06	0.463274	0.00050182
interaction103904	AT3G23560	Chr3	8454115	8456681	AT3G23550	AT4G35260	Chr4	16774194	16776325	0.481296	0.00194154	1.94095	3.39e-05
interaction57982	AT1G80110	Chr1	30135380	30136956	AT1G80080	AT3G46180	Chr3	16954364	16956833	0.948892	0.00729539	-0.52623	0.0105318
interaction165992	AT5G17650	Chr5	5816697	5818347	AT5G17630	AT4G12320	Chr4	7314777	7316669	0.438702	0.0175168	-0.324401	0.0342722
interaction79755	AT2G36780	Chr2	15417489	15419154	AT2G36750	AT5G66680	Chr5	26617543	26620667	2.94643	0.0158752	0.603555	0.0188333
interaction79589	AT2G36640	Chr2	15356833	15358612	AT2G36630	AT1G11710	Chr1	3948713	3951359	1.258	2.83e-07	-0.333989	0.0135753
interaction93017	AT3G08530	Chr3	2586805	2595572	AT3G08505	AT3G10190	Chr3	3155297	3156143	-0.280959	0.0495181	-0.6026	0.00583361
interaction117394	AT3G51910	Chr3	19265293	19266619	AT3G51880	AT3G16420	Chr3	5579385	5580953	0.740055	0.00194321	0.39134	0.0249497
interaction10751	AT1G15400	Chr1	5295772	5296902	AT1G15380	AT3G01900	Chr3	312358	313849	0.364521	0.014036	0.741285	1.14e-05
interaction83893	AT2G41870	Chr2	17470865	17472936	AT2G41850	AT5G39940	Chr5	15987460	15990701	-0.405478	0.00413722	1.16735	0.0464488
interaction153070	AT4G36740	Chr4	17314558	17316374	AT4G36710	AT1G68850	Chr1	25883615	25885247	1.54536	1.66e-07	-0.541479	0.0218834
interaction70501	AT2G27420	Chr2	11726143	11727614	AT2G27402	AT2G31470	Chr2	13407491	13408655	-1.04954	2.4e-05	-1.06107	6.83e-06
interaction48648	AT1G68620	Chr1	25765946	25767240	AT1G68580	AT1G12160	Chr1	4126065	4128310	0.608175	0.0101522	0.658484	6.9e-09
interaction176151	AT5G38020	Chr5	15165651	15167729	AT5G37990	AT4G21750	Chr4	11555185	11560733	0.687119	8.35e-06	0.441568	0.000368248
interaction79745	AT2G36770	Chr2	15415138	15416766	AT2G36750	AT2G30550	Chr2	13014847	13017153	0.910451	0.0344507	0.603555	0.0188333
interaction193058	AT5G57800	Chr5	23420208	23424052	AT5G57780	AT1G30200	Chr1	10625028	10627105	0.421265	0.00234943	-0.808407	2.79e-06
interaction84295	AT2G42200	Chr2	17587406	17589630	AT2G42170	AT1G03590	Chr1	894253	897518	-1.02747	0.00233089	1.08483	0.000131579
interaction85475	AT2G43590	Chr2	18081330	18082767	AT2G43510	AT4G29283	Chr4	14430222	14430601	-0.984811	1.3e-09	0.749543	0.0174866
interaction85466	AT2G43590	Chr2	18081330	18082767	AT2G43535	AT3G09310	Chr3	2860401	2861359	-0.984811	1.3e-09	0.909007	9.98e-11
interaction185548	AT5G48110	Chr5	19501156	19504357	AT5G47980	AT3G49950	Chr3	18522509	18523906	0.694605	0.00272552	0.698891	0.00161017
interaction181974	AT5G44050	Chr5	17722483	17726379	AT5G44020	AT3G49360	Chr3	18303045	18304416	0.621952	2.37e-05	0.874353	0.00035248
interaction6612	AT1G10700	Chr1	3554103	3556503	AT1G10682	AT5G18000	Chr5	5959899	5961642	0.482615	0.0011604	0.600802	0.000947517
interaction139885	AT4G19410	Chr4	10580892	10585861	AT4G19390	AT2G03310	Chr2	1006255	1007183	0.424784	0.000536253	0.916708	0.0493724
interaction79922	AT2G36880	Chr2	15479365	15481412	AT2G36870	AT1G29570	Chr1	10335909	10337854	-0.350921	0.011862	-0.613363	4.93e-07
interaction42909	AT1G64670	Chr1	24030819	24033556	AT1G64650	AT2G44300	Chr2	18307308	18308349	-0.669174	4.13e-06	-0.319295	0.0486165
interaction80407	AT2G37770	Chr2	15834866	15837001	AT2G37710	AT5G41510	Chr5	16607123	16608326	0.760188	0.000120954	-0.362606	0.00861139
interaction13972	AT1G21140	Chr1	7404382	7405281	AT1G21100	AT1G27130	Chr1	9425459	9426886	-0.748168	0.0240085	1.60027	0.0106632
interaction52186	AT1G72450	Chr1	27274064	27276317	AT1G72430	AT3G17810	Chr3	6094097	6096566	3.01921	1.07e-50	0.797648	0.00223754
interaction67425	AT2G23130	Chr2	9844298	9845385	AT2G23100	AT1G78110	Chr1	29391826	29393334	1.09667	2.16e-06	1.80153	2.44e-12
interaction81355	AT2G39420	Chr2	16460363	16463061	AT2G39400	AT5G46810	Chr5	18991163	18993376	0.418566	0.00667701	0.886641	0.00156915
interaction163483	AT5G12030	Chr5	3884106	3884737	AT5G12020	AT3G09290	Chr3	2856140	2856659	0.841806	0.0292994	1.03072	0.00747949
interaction72710	AT2G29490	Chr2	12631377	12632473	AT2G29450	AT3G46990	Chr3	17311671	17313752	0.529327	0.00874242	0.565233	7.69e-07
interaction86702	AT2G45570	Chr2	18779792	18781958	AT2G45540	AT5G51440	Chr5	20891162	20892211	2.79369	0.0300645	-0.406407	0.0236051
interaction117391	AT3G51880	Chr3	19246983	19249124	AT3G51860	AT2G47190	Chr2	19376201	19377531	0.39134	0.0249497	0.468204	0.0326071
interaction43888	AT1G65510	Chr1	24359452	24360081	AT1G65480	AT1G70944	Chr1	26749136	26749253	0.872973	0.000306457	3.54608	3.02e-37
interaction31167	AT1G52130	Chr1	19400618	19402363	AT1G52100	AT3G27630	Chr3	10231115	10231418	-2.53439	0.0291265	0.923981	1.71e-17
interaction15479	AT1G22570	Chr1	7976619	7978573	AT1G22530	AT1G22370	Chr1	7898012	7899879	2.15438	1.41e-11	0.873114	0.000104098
interaction110970	AT3G44890	Chr3	16386433	16388466	AT3G44860	AT1G29390	Chr1	10286292	10288103	-0.296	0.0236023	2.22608	1.43e-26
interaction67667	AT2G23620	Chr2	10047378	10049291	AT2G23590	AT4G11950	Chr4	7173275	7174259	1.29105	2.23e-05	0.751875	0.0102889
interaction35722	AT1G56540	Chr1	21181663	21185306	AT1G56520	AT3G01040	Chr3	8956	12444	1.17838	0.00280522	0.590024	0.0370245
interaction153068	AT4G36740	Chr4	17314558	17316374	AT4G36670	AT2G44480	Chr2	18359733	18363088	1.54536	1.66e-07	0.883753	0.000450548
interaction162669	AT5G11070	Chr5	3516216	3516995	AT5G11040	AT1G18610	Chr1	6405644	6409297	0.883142	4.79e-07	-0.318194	0.0296228
interaction52368	AT1G73120	Chr1	27497185	27497950	AT1G73080	AT5G20280	Chr5	6844713	6850154	0.420939	0.0499248	0.682001	1.34e-05
interaction39086	AT1G61100	Chr1	22508537	22512333	AT1G61080	AT1G51780	Chr1	19204511	19206586	1.10752	1.2e-11	0.837512	0.0397181
interaction151058	AT4G34410	Chr4	16451875	16453260	AT4G34390	AT1G69790	Chr1	26266608	26269013	5.27188	7.65e-05	0.560455	0.00120826
interaction172115	AT5G24580	Chr5	8410257	8412265	AT5G24530	AT5G66690	Chr5	26625079	26626793	-0.7205	6.61e-05	0.575526	0.00126505
interaction4701	AT1G07370	Chr1	2263139	2264551	AT1G07350	AT5G12380	Chr5	4009222	4010687	-0.561789	0.0111989	-0.463458	0.0108429
interaction41064	AT1G63020	Chr1	23354684	23362564	AT1G62975	AT5G05710	Chr5	1715874	1716499	-0.733131	0.0016892	0.666193	0.000646252
interaction197987	AT5G66770	Chr5	26660599	26662894	AT5G66750	AT4G28730	Chr4	14199095	14200901	-0.634249	0.00134833	-0.552509	0.00577751
interaction173522	AT5G26280	Chr5	9208710	9210572	AT5G26260	AT4G28860	Chr4	14246282	14249544	0.869169	3.6e-15	0.701385	0.00243956
interaction187937	AT5G51780	Chr5	21034822	21036773	AT5G51760	AT1G28080	Chr1	9789825	9791546	0.967432	3.45e-09	1.81723	0.00950489
interaction187956	AT5G51780	Chr5	21034822	21036773	AT5G51750	AT1G54820	Chr1	20447315	20450861	0.967432	3.45e-09	-0.37779	0.00670432
interaction98051	AT3G16460	Chr3	5592581	5595717	AT3G16420	AT5G13825	Chr5	4464966	4466052	0.643574	0.000518284	0.549818	2.42e-06
interaction98052	AT3G16460	Chr3	5592581	5595717	AT3G16430	AT3G22730	Chr3	8031340	8032459	0.643574	0.000518284	0.624021	0.000234038
interaction185422	AT5G48010	Chr5	19456959	19461689	AT5G47990	AT4G29283	Chr4	14430222	14430601	0.550431	0.0016802	0.682069	0.00499146
interaction162173	AT5G10230	Chr5	3209539	3211423	AT5G10170	AT3G47020	Chr3	17319861	17321077	0.608296	0.00113729	-0.393785	0.0387434
interaction97885	AT3G16420	Chr3	5579385	5580953	AT3G16400	AT1G08570	Chr1	2712882	2714734	0.549818	2.42e-06	0.549924	1.12e-05
interaction97908	AT3G16430	Chr3	5581662	5583187	AT3G16400	AT5G33320	Chr5	12588837	12591748	0.624021	0.000234038	0.549924	1.12e-05
interaction93015	AT3G08520	Chr3	2586031	2586206	AT3G08505	AT3G15354	Chr3	5169094	5172837	0.336776	0.0384009	-0.6026	0.00583361
interaction184982	AT5G46700	Chr5	18950916	18952629	AT5G46690	AT4G27290	Chr4	13666280	13669202	-0.375848	0.0351739	-1.02137	8.69e-08
interaction116169	AT3G50470	Chr3	18729053	18730269	AT3G50440	AT1G29150	Chr1	10180517	10182703	1.55499	0.000988383	0.379508	0.0277359
interaction124583	AT3G61980	Chr3	22956138	22956883	AT3G61950	AT4G22060	Chr4	11687619	11689021	0.562478	0.0037031	-1.15645	7.39e-05
interaction135759	AT4G15340	Chr4	8754479	8760589	AT4G15290	AT4G27540	Chr4	13753209	13754745	0.45226	0.034467	0.763849	0.0290418
interaction63068	AT2G17290	Chr2	7516414	7519633	AT2G17265	AT5G19550	Chr5	6598016	6601819	0.397423	0.0221735	-0.393236	0.023351
interaction179869	AT5G41100	Chr5	16447221	16450881	AT5G41080	AT1G28390	Chr1	9966185	9968301	0.529085	0.0303976	1.23589	1.33e-06
interaction41896	AT1G63860	Chr1	23701483	23706005	AT1G63850	AT1G55730	Chr1	20831051	20834519	1.95857	9.94e-22	-0.408248	0.0125737
interaction15587	AT1G22600	Chr1	7987140	7989217	AT1G22550	AT5G02480	Chr5	547562	549912	1.55239	0.00308864	0.867089	3.73e-06
interaction151954	AT4G35190	Chr4	16746598	16748266	AT4G35160	AT5G44250	Chr5	17823744	17825762	0.999974	0.0037545	0.604122	0.000656364
interaction192804	AT5G57560	Chr5	23307129	23308282	AT5G57550	AT1G76690	Chr1	28778889	28780483	1.92939	0.0493518	3.30618	0.00036668
interaction196283	AT5G63580	Chr5	25454729	25456476	AT5G63450	AT1G60920	Chr1	22429691	22430267	0.9069	0.0318131	1.59173	8.19e-22
interaction1230	AT1G02640	Chr1	564204	567769	AT1G02620	AT4G01450	Chr4	608453	610724	1.10696	0.0377967	1.72238	0.00403363
interaction162452	AT5G10625	Chr5	3358786	3359781	AT5G10580	AT4G18610	Chr4	10250697	10251542	0.976918	6.68e-05	-0.563003	0.00623516
interaction85417	AT2G43540	Chr2	18072370	18072963	AT2G43530	AT3G11100	Chr3	3476186	3477405	0.612198	0.00106388	2.13826	4.54e-44
interaction109928	AT3G42670	Chr3	14755797	14760085	AT3G42660	AT1G62300	Chr1	23016682	23019279	-0.801873	0.00112012	-0.455295	0.0124778
interaction98082	AT3G16690	Chr3	5684358	5686490	AT3G16650	AT1G64430	Chr1	23933379	23936867	1.4642	8.35e-15	0.672843	0.0371761
interaction151255	AT4G34610	Chr4	16530345	16533034	AT4G34560	AT1G62490	Chr1	23130404	23131533	-0.365567	0.0474102	-0.369996	0.0431497
interaction63065	AT2G17290	Chr2	7516414	7519633	AT2G17260	AT5G13820	Chr5	4460893	4464666	0.397423	0.0221735	-0.674194	0.0108358
interaction13624	AT1G20870	Chr1	7259101	7260775	AT1G20840	AT3G57680	Chr3	21381053	21383629	-1.0933	0.000580894	0.338391	0.0162629
interaction43947	AT1G65570	Chr1	24374097	24375846	AT1G65510	AT1G51530	Chr1	19109853	19112157	1.34961	0.0200484	0.872973	0.000306457
interaction64555	AT2G18600	Chr2	8073199	8074982	AT2G18540	AT4G26310	Chr4	13313769	13316238	1.00407	0.00570818	1.84328	1.87e-17
interaction15911	AT1G23205	Chr1	8233996	8234893	AT1G23120	AT4G16450	Chr4	9280019	9280854	-0.503867	0.0157288	0.844533	0.000893016
interaction99173	AT3G18730	Chr3	6445851	6453159	AT3G18710	AT3G52480	Chr3	19452253	19453162	-0.684251	0.0265546	-0.859482	5.75e-07
interaction64533	AT2G18600	Chr2	8073199	8074982	AT2G18550	AT5G17800	Chr5	5877188	5879331	1.00407	0.00570818	1.27457	0.0267183
interaction117393	AT3G51910	Chr3	19265293	19266619	AT3G51860	AT5G18670	Chr5	6225955	6228132	0.740055	0.00194321	0.468204	0.0326071
interaction147461	AT4G27300	Chr4	13669307	13672348	AT4G27240	AT3G56230	Chr3	20860777	20862265	0.389774	0.014193	-0.582751	0.0019699
interaction156914	AT5G03240	Chr5	771724	773515	AT5G03230	AT3G58350	Chr3	21591451	21592962	0.517205	0.000949453	-0.461544	0.00111107
interaction153655	AT4G37540	Chr4	17639532	17640665	AT4G37520	AT4G12290	Chr4	7304404	7307138	0.733907	0.000176662	0.698209	9.4e-05
interaction153656	AT4G37540	Chr4	17639532	17640665	AT4G37530	AT2G44490	Chr2	18364755	18367725	0.733907	0.000176662	0.484004	0.0274384
interaction140115	AT4G19540	Chr4	10657382	10659233	AT4G19530	AT4G22670	Chr4	11918079	11920910	0.614732	0.000786944	0.711296	9.43e-05
interaction164050	AT5G13110	Chr5	4158810	4161820	AT5G13080	AT1G51580	Chr1	19125582	19128161	-0.36969	0.0213103	0.916959	0.00659821
interaction67076	AT2G22800	Chr2	9704705	9706150	AT2G22790	AT1G75270	Chr1	28250074	28251350	0.722354	6.75e-06	0.715824	0.0228237
interaction15212	AT1G22400	Chr1	7903659	7906673	AT1G22360	AT4G39960	Chr4	18533754	18536618	1.01364	5.79e-07	0.475818	0.00188701
interaction161919	AT5G10020	Chr5	3133260	3137242	AT5G09978	AT3G09830	Chr3	3016493	3018983	-0.36669	0.0335659	0.698148	0.0119652
interaction169275	AT5G22270	Chr5	7372232	7373102	AT5G22250	AT4G15440	Chr4	8835494	8838676	0.612402	0.0462329	1.15599	1.62e-06
interaction144902	AT4G23790	Chr4	12387839	12389791	AT4G23740	AT1G68750	Chr1	25822941	25828107	-0.365595	0.0446929	-0.464098	0.000187454
interaction147255	AT4G26970	Chr4	13542917	13548629	AT4G26950	AT4G38580	Chr4	18034430	18035889	-0.296132	0.0332079	-1.92131	5.1e-06
interaction136110	AT4G15460	Chr4	8841419	8841866	AT4G15440	AT2G43280	Chr2	17989697	17991022	3.83633	0.0228273	0.713754	0.0299135
interaction85487	AT2G43590	Chr2	18081330	18082767	AT2G43540	AT4G23350	Chr4	12197312	12199200	-0.984811	1.3e-09	0.612198	0.00106388
interaction59239	AT2G02710	Chr2	758692	761013	AT2G02680	AT3G46790	Chr3	17231772	17234002	0.97469	7.03e-06	0.662812	0.0317977
interaction58765	AT2G01530	Chr2	239704	240520	AT2G01505	AT5G67170	Chr5	26799765	26802067	1.13719	9.14e-09	-0.741923	0.0200637
interaction136067	AT4G15440	Chr4	8835494	8838676	AT4G15400	AT3G51590	Chr3	19135664	19136675	0.713754	0.0299135	0.811272	0.00298893
interaction67763	AT2G23640	Chr2	10057553	10059108	AT2G23590	AT1G53640	Chr1	20020884	20025461	1.95	0.0108429	0.751875	0.0102889
interaction94957	AT3G11000	Chr3	3447567	3450589	AT3G10985	AT5G51420	Chr5	20885418	20886726	0.912995	0.0202197	0.696565	2.24e-07
interaction176193	AT5G38030	Chr5	15171245	15175457	AT5G37990	AT2G47250	Chr2	19399693	19403044	0.387675	0.00623842	0.441568	0.000368248
interaction67075	AT2G22790	Chr2	9695931	9696909	AT2G22770	AT1G20200	Chr1	7001200	7004418	0.715824	0.0228237	1.17798	1.48e-17
interaction172418	AT5G25210	Chr5	8723957	8725771	AT5G25190	AT4G28660	Chr4	14149879	14151104	0.849723	0.0151419	0.664543	0.00250856
interaction173514	AT5G26270	Chr5	9206374	9208136	AT5G26260	AT5G19710	Chr5	6664744	6666107	0.722818	8.4e-07	0.701385	0.00243956
interaction2496	AT1G04160	Chr1	1086494	1096146	AT1G04120	AT3G52190	Chr3	19353971	19357074	-0.46694	0.0115112	-0.337872	0.0469678
interaction64184	AT2G18370	Chr2	7980624	7981758	AT2G18328	AT5G10220	Chr5	3206867	3208825	0.377701	0.0198386	-0.489616	0.00768807
interaction124738	AT3G62750	Chr3	23214370	23217045	AT3G62720	AT3G50460	Chr3	18727839	18728649	-0.336491	0.0156128	1.29915	1.25e-09
interaction124739	AT3G62750	Chr3	23214370	23217045	AT3G62720	AT5G65290	Chr5	26089555	26094548	-0.336491	0.0156128	1.29915	1.25e-09
interaction124740	AT3G62750	Chr3	23214370	23217045	AT3G62720	AT5G55860	Chr5	22609531	22612393	-0.336491	0.0156128	1.29915	1.25e-09
interaction136453	AT4G15700	Chr4	8937392	8937892	AT4G15680	AT3G09840	Chr3	3019339	3023052	1.35035	0.00576997	1.00696	0.0170416
interaction136454	AT4G15700	Chr4	8937392	8937892	AT4G15680	AT5G23820	Chr5	8031267	8033020	1.35035	0.00576997	1.00696	0.0170416
interaction171219	AT5G23860	Chr5	8042875	8044819	AT5G23830	AT5G17430	Chr5	5742541	5745568	0.657403	7.96e-05	0.838758	7.64e-07
interaction171220	AT5G23860	Chr5	8042875	8044819	AT5G23830	AT5G51970	Chr5	21111444	21113403	0.657403	7.96e-05	0.838758	7.64e-07
interaction185420	AT5G48010	Chr5	19456959	19461689	AT5G47980	AT2G36890	Chr2	15485778	15487277	0.550431	0.0016802	0.698891	0.00161017
interaction99363	AT3G18950	Chr3	6536714	6538658	AT3G18890	AT1G63080	Chr1	23387630	23390816	-1.17131	3e-10	-0.418684	0.00169025
interaction18118	AT1G27130	Chr1	9425459	9426886	AT1G27100	AT1G35255	Chr1	12935646	12936553	0.449537	0.00238139	0.652152	0.00317489
interaction66829	AT2G22230	Chr2	9449983	9451622	AT2G22190	AT4G18050	Chr4	10022204	10027415	-0.403911	0.00490163	-0.962821	1.36e-05
						AT5G07340	Chr5	2317212	2319649
						AT2G14045	Chr2	5906549	5908374
						AT1G35310	Chr1	12956158	12957090
						AT1G15215	Chr1	5238064	5240051
						AT2G43520	Chr2	18068424	18069168
						AT4G28930	Chr4	14271071	14271652
						AT5G53592	Chr5	21773687	21774927
						AT3G51600	Chr3	19138393	19139252
						AT4G24630	Chr4	12714623	12717111
						AT3G61280	Chr3	22680959	22683769
						AT4G19985	Chr4	10830236	10832094
						AT5G17410	Chr5	5730609	5736695
						AT2G03820	Chr2	1164956	1167029
						AT3G20660	Chr3	7225134	7228595
						AT5G42130	Chr5	16835298	16836839
						AT2G26310	Chr2	11201302	11204153
						AT1G44740	Chr1	16887403	16889155
						AT5G50020	Chr5	20351159	20354436
						AT1G49938	Chr1	18487544	18488107
						AT1G15350	Chr1	5278259	5279877
						AT1G76500	Chr1	28705526	28706562
						AT1G26558	Chr1	9175610	9177598
						AT3G11330	Chr3	3551973	3554763
						AT4G23450	Chr4	12240802	12242706
						AT3G21700	Chr3	7644349	7646383
						AT3G26580	Chr3	9758886	9760544
						AT1G52150	Chr1	19409710	19414678
						AT1G54730	Chr1	20424409	20430123
						AT3G53960	Chr3	19978121	19980959
						AT3G46520	Chr3	17128262	17130210
						AT1G54710	Chr1	20416769	20421035
						AT3G55360	Chr3	20520929	20523014
						AT3G21730	Chr3	7659555	7661232
						AT5G57330	Chr5	23218213	23221089
						AT1G75490	Chr1	28335501	28336706
						AT2G46880	Chr2	19264572	19266446
						AT3G56810	Chr3	21036759	21038947
						AT3G21360	Chr3	7522803	7524580
						AT3G58360	Chr3	21593504	21594866
						AT4G36600	Chr4	17263665	17265100
						AT1G74880	Chr1	28129857	28131077
						AT4G26160	Chr4	13255250	13256760
						AT1G79040	Chr1	29736015	29737009
						AT4G27300	Chr4	13669307	13672348
						AT4G37510	Chr4	17626103	17628947
						AT2G22640	Chr2	9623067	9624218
						AT4G09900	Chr4	6221663	6224134
						AT1G20310	Chr1	7032289	7033208
						AT5G44340	Chr5	17859194	17861101
						AT1G05310	Chr1	1550542	1552517
						AT1G51420	Chr1	19064767	19066704
						AT1G09910	Chr1	3220034	3224541
						AT2G03370	Chr2	1024709	1027045
						AT3G58300	Chr3	21582763	21583390
						AT1G51990	Chr1	19330948	19332667
						AT3G62970	Chr3	23270632	23272923
						AT2G22530	Chr2	9572795	9577441
						AT2G40510	Chr2	16918432	16919888
						AT1G74458	Chr1	27986956	27987675
						AT3G30260	Chr3	11909118	11912880
						AT1G04120	Chr1	1064449	1071047
						AT5G63730	Chr5	25508099	25509706
						AT4G33780	Chr4	16201830	16203641
						AT5G19860	Chr5	6714263	6715875
						AT4G34780	Chr4	16592396	16592717
						AT1G66310	Chr1	24722970	24724475
						AT1G73875	Chr1	27781005	27784920
						AT5G39750	Chr5	15906874	15907942
						AT3G20690	Chr3	7231569	7232682
						AT1G23750	Chr1	8400150	8401487
						AT5G67560	Chr5	26950308	26952211
						AT3G02160	Chr3	394069	395984
						AT5G46870	Chr5	19015232	19017063
						AT1G64660	Chr1	24028917	24030780
						AT3G18970	Chr3	6543317	6545432
						AT4G05180	Chr4	2671821	2673243
						AT5G19270	Chr5	6485616	6487009
						AT1G70185	Chr1	26429732	26430069
						AT5G08580	Chr5	2780511	2783066
						AT3G01328	Chr3	117253	117568
						AT1G61700	Chr1	22787011	22788333
						AT1G01620	Chr1	225664	227302
						AT1G48640	Chr1	17986357	17988991
						AT3G53700	Chr3	19900279	19902884
						AT4G01740	Chr4	753421	755456
						AT5G02840	Chr5	648703	651972
						AT4G37370	Chr4	17569827	17571704
						AT1G75710	Chr1	28428705	28431249
						AT4G03600	Chr4	1603701	1604508
						AT3G61550	Chr3	22776400	22777225
						AT5G39865	Chr5	15965460	15967173
						AT3G15240	Chr3	5133605	5135902
						AT2G43850	Chr2	18159181	18162044
						AT3G50960	Chr3	18938696	18940428
						AT5G18370	Chr5	6085035	6088926
						AT3G01329	Chr3	118872	119178
						AT1G29380	Chr1	10284120	10285970
						AT1G77930	Chr1	29300999	29303570
						AT5G66830	Chr5	26691303	26692488
						AT5G46873	Chr5	19021204	19021529
						AT1G61060	Chr1	22488547	22489711
						AT4G01480	Chr4	626117	628055
						AT2G26975	Chr2	11512860	11513553
						AT4G21030	Chr4	11231413	11231998
						AT5G39024	Chr5	15619690	15619786
						AT1G12620	Chr1	4294593	4297084
						AT2G42160	Chr2	17574640	17577463
						AT1G02830	Chr1	625144	625608
						AT2G35960	Chr2	15106939	15107993
						AT4G24120	Chr4	12524490	12527341
						AT5G61650	Chr5	24778245	24779098
						AT4G12310	Chr4	7310415	7312577
						AT2G31990	Chr2	13611350	13613573
						AT3G51390	Chr3	19075575	19078120
						AT5G45670	Chr5	18528493	18530450
						AT3G46530	Chr3	17130366	17133338
						AT4G12960	Chr4	7583271	7584630
						AT2G37080	Chr2	15581385	15585186
						AT1G75260	Chr1	28247808	28249441
						AT3G10700	Chr3	3346577	3351023
						AT1G28470	Chr1	10010180	10012198
						AT3G29670	Chr3	11527871	11529350
						AT5G56460	Chr5	22865109	22867996
						AT5G20230	Chr5	6826505	6827629
						AT2G37100	Chr2	15591100	15592104
						AT3G46340	Chr3	17026657	17031842
						AT4G31840	Chr4	15401639	15402617
						AT5G59060	Chr5	23844300	23844777
						AT1G67148	Chr1	25121234	25121898
						AT5G13610	Chr5	4383012	4385029
						AT4G27660	Chr4	13817094	13818136
						AT2G18245	Chr2	7937281	7939600
						AT4G16695	Chr4	9394182	9395517
						AT1G68840	Chr1	25880322	25882222
						AT1G47780	Chr1	17594682	17595343
						AT1G02630	Chr1	560609	562424
						AT5G14890	Chr5	4817948	4821808
						AT1G32130	Chr1	11558860	11561920
						AT5G67160	Chr5	26797612	26799041
						AT3G59390	Chr3	21946117	21948372
						AT1G14590	Chr1	4998815	5000643
						AT3G13433	Chr3	4374235	4374712
						AT1G12850	Chr1	4379706	4381612
						AT5G37810	Chr5	15045231	15047807
						AT5G12390	Chr5	4010442	4012039
						AT5G51000	Chr5	20742532	20743669
						AT2G34970	Chr2	14746306	14748781
						AT5G23830	Chr5	8033737	8034930
						AT4G23280	Chr4	12174739	12177471
						AT1G73540	Chr1	27645657	27646698
						AT4G11660	Chr4	7042629	7044708
						AT1G01620	Chr1	225664	227302
						AT2G41690	Chr2	17381722	17382577
						AT3G47430	Chr3	17480602	17481792
						AT3G09250	Chr3	2838999	2840614
						AT2G41380	Chr2	17251940	17253057
						AT5G09978	Chr5	3120712	3121864
						AT5G43300	Chr5	17376733	17379277
						AT5G05420	Chr5	1604039	1604823
						AT4G26260	Chr4	13297697	13300387
						AT5G45660	Chr5	18525070	18527007
						AT1G73060	Chr1	27478969	27481448
						AT4G27110	Chr4	13599125	13601552
						AT1G34430	Chr1	12587751	12590192
						AT1G17190	Chr1	5875349	5876545
						AT1G12490	Chr1	4260782	4261869
						AT4G13230	Chr4	7675652	7676680
						AT2G36895	Chr2	15489027	15490347
						AT2G44450	Chr2	18340920	18343849
						AT4G25910	Chr4	13163928	13165205
						AT1G23200	Chr1	8227177	8229582
						AT3G11370	Chr3	3561098	3562880
						AT3G07970	Chr3	2541005	2543432
						AT3G50780	Chr3	18875398	18877534
						AT4G11211	Chr4	6836105	6836588
						AT3G25740	Chr3	9397785	9399762
						AT1G49300	Chr1	18234723	18237543
						AT5G07770	Chr5	2474641	2479402
						AT1G79630	Chr1	29962644	29965795
						AT1G70990	Chr1	26767296	26768076
						AT4G27700	Chr4	13826373	13827823
						AT3G12730	Chr3	4047071	4048614
						AT1G35537	Chr1	13105205	13105570
						AT1G26380	Chr1	9126736	9128528
						AT1G01300	Chr1	116942	118764
						AT4G01160	Chr4	494975	497006
						AT4G01340	Chr4	554538	556961
						AT2G19070	Chr2	8260037	8261985
						AT5G61630	Chr5	24773656	24774502
						AT2G18720	Chr2	8114919	8116811
						AT5G40270	Chr5	16093171	16097232
						AT1G03800	Chr1	957260	957998
						AT3G50470	Chr3	18729053	18730269
						AT4G13080	Chr4	7626611	7628367
						AT1G05385	Chr1	1582670	1583718
						AT1G67450	Chr1	25266162	25267359
						AT5G58510	Chr5	23648152	23654552
						AT1G68760	Chr1	25829041	25829813
						AT1G02220	Chr1	428813	430647
						AT1G78370	Chr1	29484268	29485290
						AT2G40890	Chr2	17058052	17060652
						AT1G09750	Chr1	3157500	3159148
						AT3G49820	Chr3	18481236	18481722
						AT1G59950	Chr1	22068032	22070588
						AT1G63340	Chr1	23491881	23494019
						AT3G26170	Chr3	9573359	9575148
						AT4G00315	Chr4	137403	138888
						AT4G23870	Chr4	12414229	12415049
						AT4G02370	Chr4	1042337	1043206
						AT1G11350	Chr1	3817590	3820805
						AT1G57550	Chr1	21312540	21312809
						AT4G25433	Chr4	13001197	13001870
						AT5G12260	Chr5	3966364	3968878
						AT4G28260	Chr4	14004484	14006970
						AT5G23220	Chr5	7819815	7820676
						AT4G03630	Chr4	1608749	1610037
						AT2G30420	Chr2	12960826	12962162
						AT4G38830	Chr4	18122325	18124943
						AT5G04180	Chr5	1147647	1149284
						AT1G61700	Chr1	22787011	22788333
						AT1G24200	Chr1	8571172	8572377
						AT4G01180	Chr4	501286	503394
						AT5G13900	Chr5	4481231	4481889
						AT5G44200	Chr5	17801813	17804130
						AT2G33180	Chr2	14066462	14067467
						AT2G43260	Chr2	17983690	17985104
						AT5G63660	Chr5	25485691	25486062
						AT1G65352	Chr1	24277771	24278298
						AT4G05240	Chr4	2688199	2689018
						AT2G02950	Chr2	854946	856538
						AT3G19840	Chr3	6891085	6897356
						AT5G03030	Chr5	708317	709703
						AT1G54310	Chr1	20273566	20275574
						AT1G29670	Chr1	10375762	10377871
						AT5G61610	Chr5	24770098	24771252
						AT4G05340	Chr4	2725689	2726065
						AT3G51850	Chr3	19232466	19235889
						AT4G19160	Chr4	10477295	10480141
						AT3G26932	Chr3	9930269	9932120
						AT5G50060	Chr5	20362549	20363461
						AT3G53680	Chr3	19892862	19897412
						AT3G16030	Chr3	5439608	5442802
						AT5G60820	Chr5	24469586	24470895
						AT5G20380	Chr5	6887724	6892432
						AT5G52740	Chr5	21382529	21383180
						AT5G20680	Chr5	6998102	7001910
						AT5G55920	Chr5	22645482	22649447
						AT1G67455	Chr1	25268144	25269475
						AT2G03850	Chr2	1175580	1176702
						AT4G13075	Chr4	7624679	7625192
						AT1G05730	Chr1	1718554	1720303
						AT5G18690	Chr5	6233518	6234206
						AT5G52000	Chr5	21119023	21121119
						AT5G11570	Chr5	3715942	3718276
						AT1G16130	Chr1	5525490	5528212
						AT1G62710	Chr1	23223873	23226916
						AT3G14240	Chr3	4741472	4744117
						AT4G01935	Chr4	841056	842364
						AT3G25640	Chr3	9333718	9334804
						AT3G61540	Chr3	22773385	22775827
						AT4G15960	Chr4	9045623	9047449
						AT1G07420	Chr1	2277806	2280297
						AT1G11360	Chr1	3821442	3823088
						AT4G04080	Chr4	1963357	1964423
						AT1G14600	Chr1	5001010	5003370
						AT5G12170	Chr5	3931561	3935129
						AT1G03560	Chr1	890155	892410
						AT2G43210	Chr2	17960699	17963727
						AT3G51690	Chr3	19176373	19178161
						AT1G78340	Chr1	29472891	29473863
						AT1G13610	Chr1	4663830	4666031
						AT4G08351	Chr4	5292393	5292579
						AT2G29320	Chr2	12592147	12593686
						AT5G55856	Chr5	22607926	22608640
						AT3G28100	Chr3	10456098	10460965
						AT3G52770	Chr3	19557720	19559007
						AT2G17290	Chr2	7516414	7519633
						AT2G29490	Chr2	12631377	12632473
						AT3G27500	Chr3	10182832	10185081
						AT1G22410	Chr1	7912045	7915003
						AT4G01410	Chr4	578164	579169
						AT2G18600	Chr2	8073199	8074982
						AT1G22360	Chr1	7894857	7897591
						AT3G50210	Chr3	18614169	18616452
						AT5G57620	Chr5	23334816	23336566
						AT1G25290	Chr1	8867107	8869092
						AT2G36750	Chr2	15410461	15412038
						AT2G43060	Chr2	17909184	17910082
						AT1G49970	Chr1	18501569	18504609
						AT4G37840	Chr4	17790146	17792198
						AT3G06610	Chr3	2060736	2062067
						AT1G22600	Chr1	7987140	7989217
						AT1G78800	Chr1	29625658	29627989
						AT4G23190	Chr4	12141031	12143833
						AT1G58290	Chr1	21623725	21626200
						AT1G76430	Chr1	28678934	28681995
						AT5G38490	Chr5	15411671	15413132
						AT4G12800	Chr4	7521321	7522670
						AT3G59460	Chr3	21977512	21978323
						AT3G49380	Chr3	18311908	18313490
						AT5G66830	Chr5	26691303	26692488
						AT3G21690	Chr3	7638662	7642205
						AT5G43210	Chr5	17347566	17348641
						AT5G23240	Chr5	7826731	7828724
						AT3G26380	Chr3	9660064	9663298
						AT2G33500	Chr2	14187986	14190254
						AT4G34570	Chr4	16511000	16514343
						AT2G46750	Chr2	19208319	19210958
						AT5G56610	Chr5	22916709	22918338
						AT5G59370	Chr5	23949738	23951837
						AT3G56770	Chr3	21029201	21030618
						AT3G49370	Chr3	18304741	18307906
						AT2G30210	Chr2	12887445	12889874
						AT4G39640	Chr4	18399954	18402963
						AT3G02780	Chr3	602432	604684
						AT5G64800	Chr5	25906082	25906403
						AT1G52990	Chr1	19740502	19743449
						AT5G39430	Chr5	15775301	15777599
						AT5G53550	Chr5	21755290	21758921
						AT4G22090	Chr4	11704002	11706042
						AT2G38820	Chr2	16221835	16223662
						AT4G39952	Chr4	18527679	18530007
						AT4G12070	Chr4	7231821	7234501
						AT3G01500	Chr3	194723	198019
						AT2G43650	Chr2	18099237	18103345
						AT5G66760	Chr5	26653657	26657536
						AT5G22950	Chr5	7681304	7682903
						AT1G65780	Chr1	24462957	24466888
						AT4G24640	Chr4	12717787	12719017
						AT2G31170	Chr2	13282354	13285666
						AT4G24540	Chr4	12670964	12674072
						AT4G38880	Chr4	18134115	18135714
						AT3G47590	Chr3	17535758	17537530
						AT5G07320	Chr5	2309910	2312287
						AT1G10350	Chr1	3393406	3395055
						AT3G13435	Chr3	4375424	4376069
						AT2G32020	Chr2	13631061	13631768
						AT5G26110	Chr5	9117906	9119826
						AT2G34350	Chr2	14493585	14495802
						AT1G47790	Chr1	17600003	17601173
						AT3G11210	Chr3	3510662	3513060
						AT3G08505	Chr3	2580076	2582129
						AT2G28990	Chr2	12455054	12459541
						AT1G56550	Chr1	21185661	21188369
						AT1G10370	Chr1	3397080	3398358
						AT3G25680	Chr3	9349611	9352427
						AT5G15130	Chr5	4904346	4907094
						AT5G51010	Chr5	20744565	20745703
						AT1G27140	Chr1	9427857	9428716
						AT4G00390	Chr4	171496	172843
						AT3G18670	Chr3	6424134	6426471
						AT5G07330	Chr5	2315979	2316874
						AT1G08350	Chr1	2632809	2635852
						AT5G54145	Chr5	21972464	21973083
						AT4G24530	Chr4	12667357	12670013
						AT4G22390	Chr4	11813424	11815133
						AT5G39260	Chr5	15726377	15727458
						AT4G38400	Chr4	17978442	17979740
						AT2G34340	Chr2	14488785	14489602
						AT5G13330	Chr5	4272059	4274660
						AT1G42540	Chr1	15973053	15976703
						AT1G12880	Chr1	4389750	4391151
						AT4G28270	Chr4	14007538	14009019
						AT3G58330	Chr3	21587361	21588002
						AT5G59050	Chr5	23839156	23842677
						AT5G06310	Chr5	1928390	1930951
						AT5G22450	Chr5	7437144	7443347
						AT3G01327	Chr3	116230	116548
						AT1G54520	Chr1	20363447	20366061
						AT3G24850	Chr3	9071104	9072184
						AT5G08360	Chr5	2689712	2690974
						AT1G61630	Chr1	22744206	22746111
						AT1G70190	Chr1	26430542	26432049
						AT1G76050	Chr1	28540822	28543227
						AT5G53990	Chr5	21915549	21917149
						AT4G37660	Chr4	17695495	17696270
						AT3G17520	Chr3	5999288	6000370
						AT4G23493	Chr4	12256179	12257039
						AT2G40000	Chr2	16700509	16702028
						AT2G17410	Chr2	7558976	7563752
						AT1G23770	Chr1	8405213	8406266
						AT3G48340	Chr3	17897738	17899208
						AT4G32340	Chr4	15612583	15614305
						AT2G26460	Chr2	11254931	11258973
						AT3G14750	Chr3	4953575	4955656
						AT5G26910	Chr5	9465928	9470403
						AT5G39800	Chr5	15935463	15937132
						AT1G67810	Chr1	25426487	25427349
						AT2G16240	Chr2	7039093	7039165
						AT2G28940	Chr2	12426709	12428730
						AT4G39250	Chr4	18271456	18271857
						AT1G23960	Chr1	8478406	8480316
						AT3G18820	Chr3	6484067	6486247
						AT4G38620	Chr4	18053550	18054999
						AT4G22600	Chr4	11900210	11901032
						AT2G26340	Chr2	11215251	11217033
						AT1G69520	Chr1	26128287	26129602
						AT1G59710	Chr1	21938366	21940184
						AT2G32500	Chr2	13794425	13797227
						AT1G02380	Chr1	476999	478971
						AT1G50670	Chr1	18774855	18776959
						AT5G48470	Chr5	19641743	19644362
						AT1G02720	Chr1	591825	594236
						AT5G48480	Chr5	19644674	19645889
						AT4G27120	Chr4	13601969	13604427
						AT5G11190	Chr5	3564975	3566051
						AT3G20978	Chr3	7353906	7355339
						AT2G36550	Chr2	15327478	15328802
						AT3G59260	Chr3	21903838	21905188
						AT2G41340	Chr2	17229007	17230482
						AT5G63860	Chr5	25554507	25559499
						AT4G31875	Chr4	15411700	15412289
						AT2G40230	Chr2	16803091	16804741
						AT1G67720	Chr1	25386340	25391073
						AT1G51538	Chr1	19113182	19115273
						AT5G17460	Chr5	5757097	5759795
						AT1G11362	Chr1	3824509	3825196
						AT2G29045	Chr2	12476371	12477107
						AT1G27130	Chr1	9425459	9426886
						AT3G09680	Chr3	2969044	2970371
						AT4G29960	Chr4	14660566	14662403
						AT2G30560	Chr2	13017346	13018857
						AT3G60970	Chr3	22557534	22561716
						AT1G60770	Chr1	22366700	22368714
						AT1G15215	Chr1	5238064	5240051
						AT4G12270	Chr4	7297807	7299930
						AT5G44020	Chr5	17712408	17714336
						AT2G32550	Chr2	13819378	13822839
						AT1G53790	Chr1	20079080	20081455
						AT5G54480	Chr5	22118003	22120166
						AT3G13740	Chr3	4504269	4506311
						AT2G20860	Chr2	8979578	8981226
						AT1G58430	Chr1	21711564	21713103
						AT2G26830	Chr2	11443560	11447171
						AT1G51840	Chr1	19249448	19250709
						AT4G39950	Chr4	18525245	18527579
						AT5G39270	Chr5	15729117	15730150
						AT2G03710	Chr2	1129267	1131838
						AT1G62975	Chr1	23328849	23330776
						AT1G36050	Chr1	13450203	13453683
						AT2G43280	Chr2	17989697	17991022
						AT3G04530	Chr3	1221545	1222655
						AT4G27690	Chr4	13823587	13826395
						AT3G02130	Chr3	380725	384405
						AT3G10960	Chr3	3424812	3426997
						AT4G12290	Chr4	7304404	7307138
						AT2G25355	Chr2	10801277	10803722
						AT2G29290	Chr2	12585855	12587742
						AT5G61610	Chr5	24770098	24771252
						AT1G03870	Chr1	982505	983540
						AT3G05860	Chr3	1751405	1752355
						AT2G26440	Chr2	11247382	11249493
						AT3G24210	Chr3	8753473	8756065
						AT1G27170	Chr1	9433487	9439417
						AT4G11040	Chr4	6745099	6746944
						AT2G35830	Chr2	15052198	15053275
						AT1G01390	Chr1	148119	149806
						AT5G61320	Chr5	24655097	24656638
						AT5G51410	Chr5	20880740	20883908
						AT4G39940	Chr4	18519716	18521568
						AT3G19002	Chr3	6554530	6555657
						AT1G51260	Chr1	19003375	19005641
						AT3G13430	Chr3	4367180	4368879
						AT5G26910	Chr5	9465928	9470403
						AT5G17350	Chr5	5718771	5719608
						AT3G59690	Chr3	22048753	22051673
						AT5G38350	Chr5	15328658	15331528
						AT1G22420	Chr1	7916075	7917518
						AT5G07225	Chr5	2268641	2270227
						AT2G33380	Chr2	14144830	14146471
						AT5G61880	Chr5	24850256	24851776
						AT2G45850	Chr2	18871478	18873972
						AT1G24010	Chr1	8498802	8499499
						AT5G44230	Chr5	17814335	17816309
						AT1G22130	Chr1	7812386	7814264
						AT2G29440	Chr2	12620059	12621148
						AT1G06910	Chr1	2120990	2123748
						AT1G74120	Chr1	27871273	27873260
						AT4G04040	Chr4	1939249	1942954
						AT5G58020	Chr5	23485499	23486818
						AT5G27080	Chr5	9529602	9531081
						AT5G40410	Chr5	16171373	16173226
						AT5G58780	Chr5	23735628	23737335
						AT1G27120	Chr1	9421176	9424069
						AT1G06030	Chr1	1826879	1828161
						AT4G21820	Chr4	11577523	11584053
						AT1G30900	Chr1	10997274	11000543
						AT5G56690	Chr5	22939722	22941099
						AT1G46984	Chr1	17274721	17275834
						AT1G10350	Chr1	3393406	3395055
						AT1G02720	Chr1	591825	594236
						AT2G26430	Chr2	11243218	11246035
						AT4G08150	Chr4	5147699	5150966
						AT4G34770	Chr4	16591228	16591892
						AT4G03610	Chr4	1604938	1606982
						AT1G69860	Chr1	26309627	26312174
						AT5G38420	Chr5	15380944	15382035
						AT3G15359	Chr3	5173592	5173781
						AT1G52230	Chr1	19454835	19455668
						AT1G12860	Chr1	4384352	4386610
						AT5G44480	Chr5	17921514	17923643
						AT2G43270	Chr2	17988206	17989491
						AT1G53815	Chr1	20090248	20090962
						AT5G63680	Chr5	25490072	25492752
						AT1G51250	Chr1	19001543	19002215
						AT4G25970	Chr4	13184113	13189435
						AT3G47760	Chr3	17611786	17616639
						AT5G64050	Chr5	25629854	25633209
						AT4G21000	Chr4	11222528	11223756
						AT1G28590	Chr1	10047275	10049300
						AT4G28740	Chr4	14200902	14202681
						AT1G31170	Chr1	11133409	11134844
						AT1G55660	Chr1	20800693	20802340
						AT1G59700	Chr1	21936295	21937959
						AT1G48090	Chr1	17732009	17758444
						AT1G12855	Chr1	4382159	4383611
						AT4G14440	Chr4	8306744	8307753
						AT1G05530	Chr1	1636495	1637863
						AT5G56370	Chr5	22835981	22837941
						AT5G02400	Chr5	513560	515896
						AT3G56210	Chr3	20852384	20855610
						AT1G65150	Chr1	24203840	24205775
						AT4G34770	Chr4	16591228	16591892
						AT1G11362	Chr1	3824509	3825196
						AT1G01600	Chr1	218993	221286
						AT1G21323	Chr1	7466693	7467359
						AT1G53330	Chr1	19896026	19897442
						AT1G73110	Chr1	27494120	27496878
						AT3G08670	Chr3	2633727	2636715
						AT5G67060	Chr5	26766127	26767250
						AT1G55930	Chr1	20918716	20922232
						AT1G61750	Chr1	22804612	22806318
						AT2G01360	Chr2	167996	168479
						AT1G72790	Chr1	27394746	27396799
						AT3G47750	Chr3	17606426	17610889
						AT2G27520	Chr2	11762060	11763104
						AT5G57090	Chr5	23100692	23104735
						AT4G12790	Chr4	7517054	7519422
						AT4G15248	Chr4	8708847	8709373
						AT5G11330	Chr5	3617214	3618897
						AT1G02310	Chr1	458132	460696
						AT1G49140	Chr1	18176771	18178298
						AT2G41233	Chr2	17196650	17196758
						AT4G15570	Chr4	8892606	8898999
						AT1G09483	Chr1	3060991	3061729
						AT1G30160	Chr1	10606209	10607810
						AT3G54750	Chr3	20264633	20268881
						AT5G20870	Chr5	7079974	7081769
						AT5G24950	Chr5	8595208	8597761
						AT2G19910	Chr2	8595819	8600757
						AT3G02800	Chr3	606470	607886
						AT5G17660	Chr5	5818547	5820864
						AT1G04120	Chr1	1064449	1071047
						AT1G69526	Chr1	26131293	26133196
						AT1G69810	Chr1	26277237	26279118
						AT5G53620	Chr5	21780946	21785230
						AT3G10180	Chr3	3146392	3154644
						AT1G59690	Chr1	21935309	21935820
						AT2G14610	Chr2	6241703	6242463
						AT1G12630	Chr1	4298888	4299475
						AT4G12880	Chr4	7544380	7545327
						AT4G22230	Chr4	11762291	11762688
						AT2G01880	Chr2	391422	394032
						AT5G08141	Chr5	2619141	2619555
						AT1G47790	Chr1	17600003	17601173
						AT3G10360	Chr3	3210883	3215556
						AT2G32788	Chr2	13904915	13905110
						AT4G25980	Chr4	13189392	13191507
						AT3G27884	Chr3	10346154	10348282
						AT5G39050	Chr5	15634585	15636065
						AT3G04050	Chr3	1049794	1051522
						AT5G23380	Chr5	7866741	7870302
						AT1G77370	Chr1	29073842	29074796
						AT2G29220	Chr2	12562780	12564664
						AT2G23820	Chr2	10140526	10142899
						AT1G18620	Chr1	6409977	6414451
						AT1G13110	Chr1	4467219	4469033
						AT1G16920	Chr1	5787329	5789249
						AT3G47250	Chr3	17399876	17401731
						AT1G18200	Chr1	6265415	6266937
						AT1G05940	Chr1	1801161	1803984
						AT4G01200	Chr4	506510	507626
						AT3G49350	Chr3	18297405	18300189
						AT5G18780	Chr5	6264269	6266174
						AT4G18040	Chr4	10016566	10018228
						AT5G10500	Chr5	3305330	3308109
						AT1G74640	Chr1	28032762	28034773
						AT4G25910	Chr4	13163928	13165205
						AT3G50180	Chr3	18604940	18607162
						AT4G35020	Chr4	16672191	16674771
						AT3G08680	Chr3	2637559	2640838
						AT1G14140	Chr1	4837926	4839633
						AT1G21370	Chr1	7483780	7485666
						AT1G68750	Chr1	25822941	25828107
						AT5G46130	Chr5	18702913	18704484
						AT4G12060	Chr4	7228006	7229941
						AT5G11070	Chr5	3516216	3516995
						AT5G10610	Chr5	3353506	3355124
						AT1G06620	Chr1	2025600	2027271
						AT4G23375	Chr4	12214068	12214167
						AT2G22125	Chr2	9406262	9414518
						AT3G06740	Chr3	2126413	2127467
						AT4G22530	Chr4	11859003	11860208
						AT1G65200	Chr1	24218469	24222789
						AT3G47950	Chr3	17692701	17697999
						AT3G62950	Chr3	23266248	23266934
						AT1G10360	Chr1	3395557	3396849
						AT5G08590	Chr5	2783330	2786094
						AT3G01850	Chr3	299986	302038
						AT4G27470	Chr4	13734998	13736518
						AT4G11270	Chr4	6854363	6859664
						AT1G73340	Chr1	27573115	27575419
						AT3G18980	Chr3	6546462	6548062
						AT2G20562	Chr2	8850206	8850929
						AT3G55530	Chr3	20595125	20597603
						AT1G12160	Chr1	4126065	4128310
						AT4G02970	Chr4	1317498	1319179
						AT4G37360	Chr4	17567123	17568858
						AT5G08690	Chr5	2825712	2828662
						AT5G17260	Chr5	5675322	5677912
						AT4G23290	Chr4	12177737	12180826
						AT5G39040	Chr5	15625577	15629802
						AT2G35980	Chr2	15110587	15111471
						AT2G42530	Chr2	17709035	17709945
						AT3G56220	Chr3	20858917	20860531
						AT1G11680	Chr1	3938500	3940754
						AT1G18210	Chr1	6266608	6268828
						AT5G03360	Chr5	817863	825149
						AT5G63140	Chr5	25328118	25329799
						AT4G22140	Chr4	11727725	11730509
						AT3G48270	Chr3	17876570	17878173
						AT1G77680	Chr1	29191833	29196287
						AT2G22920	Chr2	9753630	9757600
						AT5G65050	Chr5	25982253	25986326
						AT3G28080	Chr3	10451485	10455267
						AT5G56369	Chr5	22835445	22835823
						AT1G52220	Chr1	19453568	19454697
						AT3G53960	Chr3	19978121	19980959
						AT4G27410	Chr4	13707239	13709149
						AT1G79630	Chr1	29962644	29965795
						AT4G04960	Chr4	2533055	2535386
						AT5G04530	Chr5	1291821	1293688
						AT3G47990	Chr3	17713143	17716308
						AT2G03320	Chr2	1007381	1007945
						AT2G14800	Chr2	6355181	6357375
						AT3G24790	Chr3	9052981	9054531
						AT1G57720	Chr1	21377614	21380382
						AT5G44050	Chr5	17722483	17726379
						AT4G12370	Chr4	7331971	7332874
						AT3G20550	Chr3	7174463	7177942
						AT2G38160	Chr2	15986427	15988659
						AT3G49030	Chr3	18173086	18174947
						AT1G31360	Chr1	11232332	11237530
						AT5G66070	Chr5	26421854	26423240
						AT4G17780	Chr4	9880258	9881455
						AT5G11160	Chr5	3550519	3552207
						AT5G36100	Chr5	14191710	14194176
						AT1G53940	Chr1	20143278	20145780
						AT5G42110	Chr5	16831727	16832279
						AT5G37180	Chr5	14718237	14722913
						AT3G51580	Chr3	19130767	19133347
						AT1G68400	Chr1	25646038	25648946
						AT3G20680	Chr3	7230067	7231194
						AT2G41905	Chr2	17495679	17496142
						AT5G54370	Chr5	22075282	22076777
						AT3G13800	Chr3	4538766	4541487
						AT5G17640	Chr5	5810934	5813284
						AT2G25770	Chr2	10992807	10993652
						AT1G19160	Chr1	6614161	6615214
						AT4G30420	Chr4	14877068	14878914
						AT1G14890	Chr1	5137013	5137957
						AT1G51670	Chr1	19156503	19158749
						AT2G32295	Chr2	13719297	13722179
						AT4G14165	Chr4	8174597	8175715
						AT1G78300	Chr1	29461670	29463385
						AT4G33940	Chr4	16266022	16267786
						AT5G06660	Chr5	2046809	2047794
						AT2G35600	Chr2	14940844	14945357
						AT3G50340	Chr3	18665093	18666672
						AT5G54800	Chr5	22261270	22263921
						AT4G35160	Chr4	16730759	16732811
						AT5G44530	Chr5	17937688	17941292
						AT3G48890	Chr3	18129600	18131573
						AT4G19520	Chr4	10639268	10647079
						AT2G45420	Chr2	18718347	18720729
						AT5G06190	Chr5	1875788	1876782
						AT4G31695	Chr4	15345711	15345747
						AT3G50880	Chr3	18913485	18914960
						AT3G17590	Chr3	6017211	6019666
						AT3G51150	Chr3	19000855	19006769
						AT4G22970	Chr4	12033436	12043728
						AT1G28580	Chr1	10044336	10046442
						AT1G76210	Chr1	28594949	28595981
						AT4G12060	Chr4	7228006	7229941
						AT1G62800	Chr1	23253702	23257463
						AT1G05400	Chr1	1584072	1585421
						AT1G29170	Chr1	10190213	10194900
						AT2G28170	Chr2	12006370	12009956
						AT5G20730	Chr5	7016444	7022113
						AT3G22104	Chr3	7789375	7792380
						AT3G26910	Chr3	9915110	9918784
						AT4G01400	Chr4	572996	577276
						AT4G22140	Chr4	11727725	11730509
						AT1G68810	Chr1	25861122	25863120
						AT1G09210	Chr1	2972841	2976750
						AT2G30220	Chr2	12891265	12892537
						AT3G09840	Chr3	3019339	3023052
						AT1G35170	Chr1	12870737	12872194
						AT3G16230	Chr3	5500177	5503545
						AT5G48390	Chr5	19612061	19615383
						AT2G45440	Chr2	18730839	18733015
						AT4G03170	Chr4	1400831	1401584
						AT4G30390	Chr4	14862008	14863185
						AT1G75690	Chr1	28422109	28423285
						AT5G12380	Chr5	4009222	4010687
						AT3G01220	Chr3	73480	75538
						AT3G50770	Chr3	18873957	18874780
						AT4G16730	Chr4	9402897	9406003
						AT1G32170	Chr1	11575319	11577927
						AT5G17980	Chr5	5953595	5956745
						AT5G44320	Chr5	17854588	17856680
						AT1G02820	Chr1	623764	624475
						AT1G76660	Chr1	28768878	28771409
						AT2G01330	Chr2	158276	160901
						AT3G13410	Chr3	4361856	4364262
						AT2G39518	Chr2	16495874	16496995
						AT2G21920	Chr2	9343409	9347159
						AT1G63670	Chr1	23607421	23610653
						AT1G67800	Chr1	25420779	25423731
						AT5G11416	Chr5	3642779	3643010
						AT5G23800	Chr5	8022215	8024689
						AT3G59760	Chr3	22071947	22075416
						AT4G21760	Chr4	11561228	11563950
						AT1G46336	Chr1	17230410	17230653
						AT1G69795	Chr1	26272775	26272870
						AT5G07040	Chr5	2190343	2190823
						AT1G31440	Chr1	11255835	11258715
						AT2G17290	Chr2	7516414	7519633
						AT5G02500	Chr5	553744	556442
						AT1G70110	Chr1	26406237	26408323
						AT5G26080	Chr5	9107996	9108422
						AT5G41580	Chr5	16626336	16630783
						AT2G37678	Chr2	15801464	15802793
						AT1G21210	Chr1	7424105	7427041
						AT2G32800	Chr2	13916451	13919179
						AT5G51430	Chr5	20886837	20890907
						AT2G29100	Chr2	12501091	12504912
						AT4G35050	Chr4	16682579	16684848
						AT2G16970	Chr2	7369548	7375528
						AT1G28170	Chr1	9841331	9842312
						AT5G25330	Chr5	8791512	8792813
						AT2G32540	Chr2	13814685	13818289
						AT3G50890	Chr3	18916165	18917328
						AT4G13220	Chr4	7674287	7675313
						AT2G21390	Chr2	9152005	9156878
						AT3G03530	Chr3	842498	845043
						AT3G13420	Chr3	4364526	4366791
						AT4G20220	Chr4	10918675	10922396
						AT1G67900	Chr1	25464725	25470017
						AT3G23180	Chr3	8277036	8278396
						AT3G13390	Chr3	4351044	4353393
						AT2G37760	Chr2	15831853	15833920
						AT5G59260	Chr5	23907900	23909925
						AT5G65370	Chr5	26121707	26122749
						AT1G71410	Chr1	26912725	26917712
						AT1G78400	Chr1	29498280	29499682
						AT5G46010	Chr5	18660583	18661183
						AT2G17410	Chr2	7558976	7563752
						AT2G29700	Chr2	12697419	12698167
						AT1G70970	Chr1	26759833	26761042
						AT4G04890	Chr4	2476488	2482345
						AT4G17140	Chr4	9613329	9636873
						AT2G32540	Chr2	13814685	13818289
						AT1G66530	Chr1	24818910	24822342
						AT4G39640	Chr4	18399954	18402963
						AT3G09210	Chr3	2825278	2826880
						AT1G72090	Chr1	27123566	27126895
						AT5G55930	Chr5	22652714	22656106
						AT5G03560	Chr5	900459	902762
						AT2G18250	Chr2	7939906	7941678
						AT1G51860	Chr1	19257633	19261479
						AT5G46270	Chr5	18764348	18769090
						AT1G21400	Chr1	7493425	7496710
						AT1G25320	Chr1	8877856	8880310
						AT3G24225	Chr3	8768845	8769172
						AT5G49334	Chr5	20003967	20004102
						AT3G04530	Chr3	1221545	1222655
						AT1G53645	Chr1	20026146	20028635
						AT2G33380	Chr2	14144830	14146471
						AT3G19895	Chr3	6917293	6921556
						AT5G18010	Chr5	5962896	5963405
						AT5G40380	Chr5	16151771	16155177
						AT5G51000	Chr5	20742532	20743669
						AT5G24070	Chr5	8134300	8135991
						AT3G22700	Chr3	8024797	8025814
						AT4G24420	Chr4	12627095	12627606
						AT3G52390	Chr3	19422987	19425214
						AT5G67280	Chr5	26842269	26845190
						AT3G58840	Chr3	21757311	21758772
						AT5G02010	Chr5	383152	385850
						AT5G03800	Chr5	1010779	1013586
						AT3G58880	Chr3	21768484	21770167
						AT1G61050	Chr1	22486735	22488284
						AT1G60410	Chr1	22258981	22260715
						AT5G11080	Chr5	3517222	3520003
						AT5G39000	Chr5	15611859	15614481
						AT5G10340	Chr5	3253121	3255045
						AT2G16586	Chr2	7190936	7191938
						AT3G25760	Chr3	9403882	9405250
						AT4G12360	Chr4	7327991	7329192
						AT1G63680	Chr1	23614436	23617767
						AT2G41705	Chr2	17397273	17400081
						AT1G22370	Chr1	7898012	7899879
						AT1G65510	Chr1	24359452	24360081
						AT2G31250	Chr2	13319620	13321526
						AT2G01350	Chr2	165140	167259
						AT1G03560	Chr1	890155	892410
						AT5G38960	Chr5	15592991	15593783
						AT2G18670	Chr2	8093219	8095729
						AT1G22430	Chr1	7919143	7921832
						AT2G36960	Chr2	15522919	15527758
						AT5G64760	Chr5	25893779	25896582
						AT1G24000	Chr1	8496056	8496566
						AT1G78380	Chr1	29486412	29487906
						AT5G46870	Chr5	19015232	19017063
						AT1G20190	Chr1	6998488	6999817
						AT3G04530	Chr3	1221545	1222655
						AT5G15250	Chr5	4950358	4952803
						AT3G26280	Chr3	9630199	9632009
						AT1G54780	Chr1	20439433	20441159
						AT5G16020	Chr5	5229691	5232241
						AT1G77640	Chr1	29178736	29179675
						AT3G09260	Chr3	2840476	2843781
						AT1G70940	Chr1	26743053	26746395
						AT2G18640	Chr2	8083739	8084888
						AT3G58310	Chr3	21584037	21585030
						AT5G52120	Chr5	21176421	21180310
						AT4G01410	Chr4	578164	579169
						AT1G20350	Chr1	7043712	7044592
						AT2G03750	Chr2	1147806	1149061
						AT3G18910	Chr3	6521718	6523043
						AT4G20250	Chr4	10937989	10940528
						AT5G52750	Chr5	21384042	21384924
						AT2G44300	Chr2	18307308	18308349
						AT1G22410	Chr1	7912045	7915003
						AT5G63580	Chr5	25454729	25456476
						AT3G09840	Chr3	3019339	3023052
						AT2G44910	Chr2	18517886	18519525
						AT2G35950	Chr2	15104760	15106088
						AT3G08670	Chr3	2633727	2636715
						AT1G31850	Chr1	11430221	11433699
						AT2G42540	Chr2	17711031	17712330
						AT3G57580	Chr3	21320490	21322379
						AT4G37770	Chr4	17752083	17754157
						AT5G15330	Chr5	4980487	4982231
						AT5G58784	Chr5	23739949	23741279
						AT1G66130	Chr1	24614961	24616930
						AT1G79060	Chr1	29741747	29743600
						AT5G41430	Chr5	16586118	16586604
						AT3G55130	Chr3	20433877	20436390
						AT1G65681	Chr1	24428874	24430670
						AT1G65850	Chr1	24494677	24498542
						AT2G34050	Chr2	14382682	14384279
						AT5G24560	Chr5	8402204	8403266
						AT2G16230	Chr2	7035462	7038326
						AT1G20310	Chr1	7032289	7033208
						AT4G22800	Chr4	11978004	11983071
						AT2G40990	Chr2	17105096	17106773
						AT1G76060	Chr1	28543099	28543850
						AT4G16765	Chr4	9429874	9432437
						AT5G17770	Chr5	5864250	5866709
						AT2G26720	Chr2	11384781	11385402
						AT3G10930	Chr3	3420129	3420832
						AT1G59675	Chr1	21931832	21932403
						AT1G12120	Chr1	4114770	4117594
						AT5G59070	Chr5	23845197	23847393
						AT5G17750	Chr5	5858694	5860041
						AT5G53660	Chr5	21794535	21796046
						AT4G18860	Chr4	10344686	10345588
						AT5G41550	Chr5	16617231	16620785
						AT3G59400	Chr3	21948716	21949710
						AT2G46890	Chr2	19266732	19268170
						AT5G64810	Chr5	25908412	25909803
						AT3G51910	Chr3	19265293	19266619
						AT4G17680	Chr4	9842871	9844265
						AT5G09210	Chr5	2862609	2865359
						AT1G04330	Chr1	1161310	1161982
						AT5G59100	Chr5	23858893	23862129
						AT5G39850	Chr5	15950021	15951425
						AT3G09960	Chr3	3061951	3063594
						AT2G34680	Chr2	14616621	14629129
						AT1G05400	Chr1	1584072	1585421
						AT3G46540	Chr3	17134090	17135587
						AT5G26360	Chr5	9255052	9258991
						AT4G26250	Chr4	13289640	13291084
						AT5G06330	Chr5	1934738	1935644
						AT5G51720	Chr5	21009591	21010345
						AT2G45550	Chr2	18773540	18775654
						AT2G29420	Chr2	12617935	12618899
						AT1G75717	Chr1	28433918	28434261
						AT1G17050	Chr1	5829079	5831343
						AT5G26310	Chr5	9234684	9236385
						AT4G12890	Chr4	7546376	7547641
						AT4G21590	Chr4	11480343	11482719
						AT1G29590	Chr1	10339936	10342848
						AT3G28050	Chr3	10442813	10445398
						AT1G22010	Chr1	7749570	7750062
						AT2G39540	Chr2	16500865	16501241
						AT1G11720	Chr1	3951552	3957044
						AT1G26160	Chr1	9044440	9046979
						AT5G11520	Chr5	3685088	3687764
						AT2G26150	Chr2	11135681	11137396
						AT3G01323	Chr3	121056	121423
						AT2G28030	Chr2	11934207	11935386
						AT4G21580	Chr4	11475718	11477768
						AT3G28220	Chr3	10524403	10526728
						AT5G27560	Chr5	9731601	9733918
						AT1G03390	Chr1	841032	842418
						AT5G36910	Chr5	14561816	14562750
						AT1G16110	Chr1	5518372	5520891
						AT3G01326	Chr3	115319	115756
						AT1G33520	Chr1	12157155	12158953
						AT1G03830	Chr1	962015	966757
						AT1G61630	Chr1	22744206	22746111
						AT2G31480	Chr2	13408977	13410999
						AT4G22105	Chr4	11710217	11710608
						AT3G47930	Chr3	17684443	17687620
						AT2G21320	Chr2	9126262	9127843
						AT3G43430	Chr3	15354534	15355304
						AT3G57250	Chr3	21186718	21187251
						AT5G46340	Chr5	18795925	18800094
						AT3G15290	Chr3	5144996	5146856
						AT3G57610	Chr3	21334283	21336674
						AT3G53700	Chr3	19900279	19902884
						AT4G19500	Chr4	10625658	10631570
						AT1G05410	Chr1	1585370	1587778
						AT5G05060	Chr5	1493718	1495085
						AT2G31700	Chr2	13480509	13481568
						AT1G09260	Chr1	2993403	2993820
						AT1G14240	Chr1	4864901	4868000
						AT2G18340	Chr2	7969319	7971114
						AT5G24940	Chr5	8591406	8593601
						AT3G51600	Chr3	19138393	19139252
						AT1G03820	Chr1	959868	960728
						AT5G13917	Chr5	4485167	4485311
						AT1G51160	Chr1	18949590	18951783
						AT5G51780	Chr5	21034822	21036773
						AT3G48950	Chr3	18148016	18149987
						AT1G11090	Chr1	3702607	3703779
						AT3G26700	Chr3	9809949	9812664
						AT5G38520	Chr5	15421572	15423431
						AT5G42895	Chr5	17196794	17197163
						AT1G62260	Chr1	22997825	22999796
						AT1G51538	Chr1	19113182	19115273
						AT1G32080	Chr1	11537341	11539800
						AT3G15220	Chr3	5126596	5132306
						AT5G13490	Chr5	4335466	4337680
						AT3G51910	Chr3	19265293	19266619
						AT2G34820	Chr2	14689623	14690879
						AT1G32510	Chr1	11756999	11758118
						AT1G64230	Chr1	23833550	23835536
						AT1G63070	Chr1	23385323	23387167
						AT5G13500	Chr5	4338154	4341003
						AT1G02816	Chr1	621460	622469
						AT1G06040	Chr1	1828412	1829890
						AT5G52020	Chr5	21123957	21124948
						AT3G14770	Chr3	4957333	4959704
						AT3G13437	Chr3	4376360	4376959
						AT1G51660	Chr1	19154322	19155947
						AT2G28790	Chr2	12354429	12355431
						AT3G06650	Chr3	2079032	2083291
						AT5G04510	Chr5	1286865	1289908
						AT2G20570	Chr2	8855357	8857756
						AT2G23130	Chr2	9844298	9845385
						AT2G40995	Chr2	17109393	17109712
						AT1G64360	Chr1	23887869	23888533
						AT1G20340	Chr1	7042428	7043363
						AT3G01326	Chr3	115319	115756
						AT5G64760	Chr5	25893779	25896582
						AT5G09470	Chr5	2949240	2950513
						AT3G26370	Chr3	9656743	9659935
						AT1G68510	Chr1	25706881	25708255
						AT5G54760	Chr5	22243799	22245770
						AT5G62820	Chr5	25223726	25225021
						AT3G22760	Chr3	8044454	8047530
						AT2G29640	Chr2	12671205	12673300
						AT1G80700	Chr1	30331921	30333400
						AT3G23250	Chr3	8309208	8310826
						AT3G18480	Chr3	6336735	6341788
						AT1G66120	Chr1	24612619	24614805
						AT2G36261	Chr2	15203903	15204146
						AT1G05520	Chr1	1630899	1635711
						AT4G25980	Chr4	13189392	13191507
						AT1G22650	Chr1	8013381	8015991
						AT4G23440	Chr4	12237764	12240826
						AT1G68526	Chr1	25711868	25712238
						AT3G01660	Chr3	245477	246508
						AT1G75730	Chr1	28435705	28439769
						AT5G35760	Chr5	13934107	13934782
						AT5G38990	Chr5	15608813	15611598
						AT1G09932	Chr1	3230449	3233109
						AT2G35000	Chr2	14751573	14753319
						AT3G44790	Chr3	16328791	16330265
						AT5G51710	Chr5	21004277	21008718
						AT3G52840	Chr3	19581112	19586299
						AT4G11670	Chr4	7044243	7053091
						AT1G05240	Chr1	1521136	1522681
						AT5G28500	Chr5	10477770	10479384
						AT2G41930	Chr2	17501628	17502684
						AT4G22110	Chr4	11711313	11714228
						AT4G26070	Chr4	13217648	13219933
						AT4G15340	Chr4	8754479	8760589
						AT3G16895	Chr3	5770867	5771544
						AT2G36255	Chr2	15201401	15201728
						AT5G04000	Chr5	1079036	1079869
						AT3G02010	Chr3	337964	340442
						AT3G12860	Chr3	4091569	4093921
						AT3G56930	Chr3	21073420	21076314
						AT5G40610	Chr5	16264860	16267354
						AT2G02950	Chr2	854946	856538
						AT2G43510	Chr2	18067171	18067802
						AT5G26880	Chr5	9457036	9459230
						AT5G11560	Chr5	3709480	3714059
						AT3G02790	Chr3	604844	605421
						AT4G04810	Chr4	2441326	2442567
						AT2G32860	Chr2	13940186	13943804
						AT1G30060	Chr1	10545086	10545906
						AT5G03830	Chr5	1018337	1020460
						AT3G47210	Chr3	17385312	17387244
						AT3G60130	Chr3	22210245	22213840
						AT5G42150	Chr5	16846149	16848279
						AT1G30700	Chr1	10892569	10894572
						AT2G32300	Chr2	13722426	13723590
						AT3G20580	Chr3	7187855	7190562
						AT1G15520	Chr1	5331857	5338326
						AT4G24130	Chr4	12527752	12528593
						AT2G25095	Chr2	10676471	10676553
						AT2G18070	Chr2	7852528	7853666
						AT3G26310	Chr3	9641088	9642779
						AT5G06680	Chr5	2056586	2059787
						AT2G43580	Chr2	18078648	18080028
						AT1G53820	Chr1	20091490	20092423
						AT3G18510	Chr3	6355663	6356153
						AT3G18535	Chr3	6375676	6377220
						AT5G58500	Chr5	23645534	23646083
						AT1G07350	Chr1	2257424	2260101
						AT4G27710	Chr4	13828431	13830596
						AT3G22080	Chr3	7777817	7781718
						AT4G29285	Chr4	14431525	14432290
						AT3G19002	Chr3	6554530	6555657
						AT4G29690	Chr4	14540906	14542481
						AT5G40370	Chr5	16147593	16149198
						AT2G33500	Chr2	14187986	14190254
						AT3G18670	Chr3	6424134	6426471
						AT1G73570	Chr1	27650991	27653942
						AT5G59030	Chr5	23833727	23834511
						AT1G66930	Chr1	24970522	24973069
						AT1G73270	Chr1	27549020	27552517
						AT1G11390	Chr1	3834458	3837629
						AT2G34980	Chr2	14748966	14749878
						AT5G07000	Chr5	2171402	2172939
						AT5G25270	Chr5	8757546	8762757
						AT2G41905	Chr2	17495679	17496142
						AT1G34580	Chr1	12660550	12663870
						AT3G12970	Chr3	4141050	4142548
						AT4G01120	Chr4	481596	484483
						AT4G31870	Chr4	15410204	15411617
						AT1G63220	Chr1	23448918	23450452
						AT1G48740	Chr1	18023386	18026065
						AT1G63520	Chr1	23559886	23562143
						AT3G48300	Chr3	17885523	17887118
						AT5G39910	Chr5	15979411	15981671
						AT1G70150	Chr1	26416897	26419588
						AT2G47430	Chr2	19459044	19464087
						AT1G22550	Chr1	7966532	7968641
						AT1G67740	Chr1	25394067	25395154
						AT4G05160	Chr4	2664384	2666707
						AT1G60760	Chr1	22365831	22366323
						AT4G34800	Chr4	16596859	16597144
						AT5G24150	Chr5	8172315	8175431
						AT5G46115	Chr5	18701319	18701740
						AT3G04520	Chr3	1217238	1219771
						AT1G77330	Chr1	29062989	29064537
						AT3G52560	Chr3	19494376	19496095
						AT1G25280	Chr1	8863776	8866805
						AT2G20580	Chr2	8858987	8864865
						AT4G18760	Chr4	10308162	10309458
						AT5G23989	Chr5	8105232	8105325
						AT4G28690	Chr4	14158949	14160979
						AT4G04900	Chr4	2486217	2487779
						AT1G56550	Chr1	21185661	21188369
						AT4G10590	Chr4	6538540	6543448
						AT4G23940	Chr4	12437107	12441968
						AT2G41000	Chr2	17111444	17113636
						AT2G18720	Chr2	8114919	8116811
						AT5G61345	Chr5	24667281	24667353
						AT4G31860	Chr4	15406438	15409000
						AT3G21320	Chr3	7499052	7501841
						AT5G20740	Chr5	7025685	7026532
						AT5G55950	Chr5	22658111	22660434
						AT5G08060	Chr5	2580448	2582564
						AT1G05000	Chr1	1425592	1428782
						AT5G09440	Chr5	2938346	2939461
						AT5G26240	Chr5	9189523	9194731
						AT1G06010	Chr1	1822617	1823997
						AT1G58520	Chr1	21729912	21738652
						AT2G28960	Chr2	12437913	12442347
						AT4G12020	Chr4	7201655	7209648
						AT1G70060	Chr1	26383243	26389916
						AT2G44460	Chr2	18346438	18349966
						AT3G04040	Chr3	1047639	1049260
						AT3G54970	Chr3	20368167	20370098
						AT4G19610	Chr4	10677228	10681771
						AT4G16892	Chr4	9506321	9508337
						AT1G11710	Chr1	3948713	3951359
						AT5G20860	Chr5	7076889	7079077
						AT1G14185	Chr1	4850273	4852096
						AT4G20980	Chr4	11216880	11219638
						AT3G09320	Chr3	2861742	2864245
						AT2G44290	Chr2	18305200	18306251
						AT5G58770	Chr5	23734375	23735634
						AT2G37760	Chr2	15831853	15833920
						AT3G47390	Chr3	17459338	17464716
						AT1G04330	Chr1	1161310	1161982
						AT2G39240	Chr2	16384785	16387827
						AT5G43100	Chr5	17299122	17303058
						AT1G20132	Chr1	6981263	6983627
						AT3G47920	Chr3	17682951	17683854
						AT2G31240	Chr2	13317414	13319560
						AT4G37660	Chr4	17695495	17696270
						AT3G14370	Chr3	4797844	4799504
						AT4G37320	Chr4	17559579	17561727
						AT3G56220	Chr3	20858917	20860531
						AT4G23380	Chr4	12214666	12216333
						AT1G05000	Chr1	1425592	1428782
						AT2G28220	Chr2	12033952	12037527
						AT4G28085	Chr4	13959969	13960574
						AT2G32320	Chr2	13726818	13731767
						AT3G09370	Chr3	2879365	2882267
						AT1G58390	Chr1	21690961	21694447
						AT3G54760	Chr3	20269079	20272457
						AT3G28230	Chr3	10529214	10530199
						AT4G24290	Chr4	12594281	12598028
						AT1G13650	Chr1	4680431	4682196
						AT3G26730	Chr3	9823684	9827438
						AT2G36640	Chr2	15356833	15358612
						AT2G42190	Chr2	17582868	17584194
						AT1G11545	Chr1	3878549	3880361
						AT2G32810	Chr2	13919126	13925351
						AT2G17785	Chr2	7728185	7728927
						AT2G39410	Chr2	16455568	16458217
						AT3G16030	Chr3	5439608	5442802
						AT5G39440	Chr5	15781906	15784699
						AT5G51710	Chr5	21004277	21008718
						AT4G01470	Chr4	625091	625850
						AT1G54320	Chr1	20275533	20277957
						AT3G07120	Chr3	2254478	2255742
						AT1G57550	Chr1	21312540	21312809
						AT1G27580	Chr1	9589932	9591075
						AT4G04880	Chr4	2464858	2467166
						AT5G60100	Chr5	24197997	24201404
						AT4G11600	Chr4	7009768	7011375
						AT4G24620	Chr4	12708751	12712825
						AT4G00310	Chr4	133642	135469
						AT1G14230	Chr1	4861265	4864094
						AT3G53640	Chr3	19887006	19888935
						AT5G12270	Chr5	3970130	3971301
						AT2G19040	Chr2	8249922	8250141
						AT4G12300	Chr4	7307736	7309755
						AT5G54060	Chr5	21936878	21938369
						AT3G01326	Chr3	115319	115756
						AT3G48260	Chr3	17873011	17875220
						AT5G17200	Chr5	5653523	5655336
						AT4G12930	Chr4	7573280	7573706
						AT1G03870	Chr1	982505	983540
						AT1G78460	Chr1	29518315	29519323
						AT5G20250	Chr5	6833658	6836782
						AT3G60450	Chr3	22340956	22342315
						AT4G11400	Chr4	6938716	6940539
						AT4G34770	Chr4	16591228	16591892
						AT3G06360	Chr3	1928901	1929446
						AT1G60870	Chr1	22409471	22410654
						AT4G20210	Chr4	10913612	10918282
						AT1G10586	Chr1	3496927	3499439
						AT2G01890	Chr2	396767	399208
						AT5G15220	Chr5	4941243	4942483
						AT1G77640	Chr1	29178736	29179675
						AT3G50980	Chr3	18941924	18942865
						AT4G16915	Chr4	9516723	9518697
						AT1G71000	Chr1	26769335	26770111
						AT4G23450	Chr4	12240802	12242706
						AT1G61380	Chr1	22646071	22649521
						AT2G46494	Chr2	19082343	19083811
						AT4G03620	Chr4	1607039	1608665
						AT4G01060	Chr4	460471	461085
						AT2G46870	Chr2	19260917	19262404
						AT1G71760	Chr1	26989349	26990617
						AT2G47270	Chr2	19411559	19412151
						AT3G27590	Chr3	10220325	10221857
						AT3G45590	Chr3	16732592	16733854
						AT1G23724	Chr1	8393186	8393330
						AT5G53740	Chr5	21811632	21814908
						AT4G21445	Chr4	11424709	11425767
						AT1G54340	Chr1	20283479	20286786
						AT2G29000	Chr2	12460780	12465037
						AT1G80330	Chr1	30198060	30199537
						AT1G50690	Chr1	18779605	18780604
						AT3G50970	Chr3	18940776	18941554
						AT3G25730	Chr3	9396419	9397747
						AT3G07990	Chr3	2552476	2554921
						AT4G15330	Chr4	8751386	8753157
						AT1G14040	Chr1	4810487	4814543
						AT3G61940	Chr3	22937169	22938574
						AT5G25300	Chr5	8780257	8783093
						AT4G35160	Chr4	16730759	16732811
						AT1G12250	Chr1	4159264	4161455
						AT1G12250	Chr1	4159264	4161455
						AT3G15680	Chr3	5315000	5316466
						AT4G15520	Chr4	8862814	8864618
						AT5G63840	Chr5	25545055	25549199
						AT4G12870	Chr4	7542232	7543474
						AT5G25850	Chr5	9014081	9015917
						AT1G11330	Chr1	3810092	3813607
						AT5G52130	Chr5	21182467	21183875
						AT1G64910	Chr1	24115136	24116747
						AT1G33820	Chr1	12278437	12279451
						AT1G03830	Chr1	962015	966757
						AT1G64370	Chr1	23888919	23889661
						AT3G25770	Chr3	9406872	9407955
						AT4G02690	Chr4	1185750	1187816
						AT1G19670	Chr1	6803610	6805044
						AT3G06370	Chr3	1930395	1934073
						AT5G56800	Chr5	22972988	22974308
						AT1G52780	Chr1	19658642	19662181
						AT1G12530	Chr1	4268985	4270787
						AT4G23730	Chr4	12362483	12365098
						AT3G46750	Chr3	17219740	17221638
						AT1G65740	Chr1	24452095	24453211
						AT4G02660	Chr4	1159666	1174321
						AT5G54020	Chr5	21921863	21923534
						AT1G77520	Chr1	29130402	29132180
						AT2G36895	Chr2	15489027	15490347
						AT2G37170	Chr2	15613401	15614857
						AT5G51730	Chr5	21011417	21013657
						AT4G11140	Chr4	6794775	6795793
						AT5G64790	Chr5	25902640	25904701
						AT1G06270	Chr1	1918087	1919760
						AT3G53700	Chr3	19900279	19902884
						AT4G18340	Chr4	10130049	10132061
						AT5G23200	Chr5	7807182	7809164
						AT2G18980	Chr2	8233334	8235316
						AT1G21090	Chr1	7384628	7386558
						AT4G24070	Chr4	12508894	12509095
						AT2G03120	Chr2	937419	940339
						AT1G06380	Chr1	1945123	1946076
						AT5G10625	Chr5	3358786	3359781
						AT1G10050	Chr1	3279269	3283482
						AT2G25220	Chr2	10742712	10745594
						AT2G34140	Chr2	14413757	14414765
						AT1G64770	Chr1	24057062	24059561
						AT1G05540	Chr1	1639285	1640811
						AT4G37920	Chr4	17828432	17830465
						AT5G38980	Chr5	15606770	15607350
						AT4G14160	Chr4	8167425	8173368
						AT3G26210	Chr3	9593131	9595243
						AT5G19640	Chr5	6636459	6638590
						AT3G23175	Chr3	8273999	8275470
						AT1G61560	Chr1	22708603	22712210
						AT1G46554	Chr1	17252951	17253903
						AT3G23240	Chr3	8295643	8296604
						AT1G13630	Chr1	4669783	4672957
						AT1G48530	Chr1	17943241	17944315
						AT4G29940	Chr4	14648138	14653379
						AT1G63080	Chr1	23387630	23390816
						AT5G63680	Chr5	25490072	25492752
						AT1G16300	Chr1	5574309	5577622
						AT3G09950	Chr3	3060089	3060633
						AT5G07060	Chr5	2193965	2195963
						AT1G63080	Chr1	23387630	23390816
						AT2G44270	Chr2	18297860	18300273
						AT4G39490	Chr4	18365048	18366888
						AT5G13610	Chr5	4383012	4385029
						AT4G23050	Chr4	12080059	12084256
						AT2G39230	Chr2	16381646	16384250
						AT1G10380	Chr1	3400605	3402324
						AT3G61270	Chr3	22678150	22680379
						AT3G13433	Chr3	4374235	4374712
						AT3G28230	Chr3	10529214	10530199
						AT5G20810	Chr5	7043897	7045712
						AT5G63580	Chr5	25454729	25456476
						AT1G22140	Chr1	7814762	7815631
						AT1G25280	Chr1	8863776	8866805
						AT5G12370	Chr5	4002774	4008804
						AT1G67890	Chr1	25457178	25462792
						AT5G67290	Chr5	26848147	26849846
						AT1G68520	Chr1	25709113	25710907
						AT3G26280	Chr3	9630199	9632009
						AT4G14630	Chr4	8392840	8393813
						AT4G03165	Chr4	1399377	1400291
						AT3G16220	Chr3	5497596	5499235
						AT5G43190	Chr5	17340137	17341569
						AT3G01210	Chr3	71625	73220
						AT1G55020	Chr1	20525707	20530273
						AT2G43530	Chr2	18070055	18070718
						AT3G27884	Chr3	10346154	10348282
						AT3G18980	Chr3	6546462	6548062
						AT5G19855	Chr5	6711971	6713636
						AT1G11070	Chr1	3690211	3693648
						AT5G06560	Chr5	2003303	2006188
						AT1G73280	Chr1	27552969	27555322
						AT3G45400	Chr3	16651962	16653678
						AT4G01510	Chr4	642732	644336
						AT3G51375	Chr3	19073449	19073541
						AT1G73560	Chr1	27649694	27650471
						AT1G29120	Chr1	10174186	10178521
						AT1G07620	Chr1	2344389	2346842
						AT2G32100	Chr2	13647851	13648785
						AT4G35170	Chr4	16736756	16738437
						AT1G11970	Chr1	4044369	4044669
						AT4G35210	Chr4	16751223	16752239
						AT5G61630	Chr5	24773656	24774502
						AT5G62430	Chr5	25069092	25070934
						AT1G18280	Chr1	6294332	6295364
						AT5G09500	Chr5	2953912	2954918
						AT1G21590	Chr1	7566231	7569902
						AT1G11730	Chr1	3957472	3960113
						AT3G28917	Chr3	10924816	10925640
						AT1G49930	Chr1	18484931	18485639
						AT1G28306	Chr1	9907201	9907615
						AT1G54730	Chr1	20424409	20430123
						AT2G39510	Chr2	16491142	16493151
						AT4G14430	Chr4	8304599	8305705
						AT4G28690	Chr4	14158949	14160979
						AT5G41071	Chr5	16440068	16440251
						AT2G33370	Chr2	14143553	14144721
						AT3G02950	Chr3	665357	666907
						AT1G14410	Chr1	4929122	4930904
						AT4G17770	Chr4	9876237	9880254
						AT1G17040	Chr1	5824847	5828233
						AT4G27090	Chr4	13593904	13595252
						AT5G44050	Chr5	17722483	17726379
						AT5G15090	Chr5	4888963	4891603
						AT3G11200	Chr3	3508041	3510627
						AT1G07880	Chr1	2434029	2435763
						AT4G19185	Chr4	10489041	10491671
						AT4G26560	Chr4	13406732	13407973
						AT5G22460	Chr5	7443507	7445546
						AT1G65120	Chr1	24191347	24196073
						AT1G31710	Chr1	11349839	11355486
						AT2G33051	Chr2	14022036	14025085
						AT3G01760	Chr3	273298	275270
						AT5G48110	Chr5	19501156	19504357
						AT1G06390	Chr1	1946787	1950860
						AT1G31230	Chr1	11158617	11163274
						AT1G70080	Chr1	26394668	26397565
						AT5G54062	Chr5	21938792	21939623
						AT2G47485	Chr2	19485874	19486553
						AT3G16910	Chr3	5773054	5775501
						AT2G39520	Chr2	16496812	16497621
						AT5G11530	Chr5	3695861	3701548
						AT1G72416	Chr1	27258828	27260291
						AT2G21380	Chr2	9141630	9149309
						AT3G14810	Chr3	4970989	4974534
						AT3G52680	Chr3	19527028	19531167
						AT2G29660	Chr2	12678889	12680667
						AT5G20070	Chr5	6779853	6782482
						AT1G31173	Chr1	11137364	11138969
						AT3G24130	Chr3	8711662	8713424
						AT3G24130	Chr3	8711662	8713424
						AT1G69526	Chr1	26131293	26133196
						AT1G16290	Chr1	5570752	5573538
						AT1G35560	Chr1	13115825	13117235
						AT1G63880	Chr1	23712275	23716124
						AT2G39980	Chr2	16687672	16689956
						AT5G18330	Chr5	6068473	6070042
						AT1G51890	Chr1	19274657	19278528
						AT4G12300	Chr4	7307736	7309755
						AT1G56380	Chr1	21101326	21102701
						AT4G04910	Chr4	2489416	2495766
						AT3G03470	Chr3	824551	826437
						AT1G17200	Chr1	5878399	5880041
						AT3G07130	Chr3	2255709	2258005
						AT3G59850	Chr3	22109163	22111609
						AT5G27300	Chr5	9620809	9624990
						AT1G55700	Chr1	20821600	20823640
						AT5G52340	Chr5	21250801	21253939
						AT1G22470	Chr1	7932853	7933390
						AT2G03720	Chr2	1132169	1133379
						AT5G04270	Chr5	1182717	1184765
						AT3G21340	Chr3	7511786	7515937
						AT1G01540	Chr1	195779	198684
						AT1G28590	Chr1	10047275	10049300
						AT3G09640	Chr3	2956155	2958327
						AT5G06570	Chr5	2007599	2011041
						AT5G38480	Chr5	15409696	15411516
						AT1G23750	Chr1	8400150	8401487
						AT4G39952	Chr4	18527679	18530007
						AT2G03840	Chr2	1173169	1174115
						AT5G17330	Chr5	5711011	5715075
						AT5G50990	Chr5	20739418	20741281
						AT3G14310	Chr3	4771901	4775119
						AT3G26270	Chr3	9627561	9629200
						AT4G21590	Chr4	11480343	11482719
						AT1G72120	Chr1	27132096	27133985
						AT4G15610	Chr4	8909063	8910908
						AT1G51850	Chr1	19252846	19256783
						AT2G44020	Chr2	18217558	18219385
						AT2G03250	Chr2	982172	986662
						AT3G47390	Chr3	17459338	17464716
						AT4G13480	Chr4	7836674	7837684
						AT1G33890	Chr1	12308283	12309686
						AT5G19855	Chr5	6711971	6713636
						AT2G15570	Chr2	6791289	6792933
						AT2G47200	Chr2	19377728	19378331
						AT5G43000	Chr5	17246353	17247202
						AT1G61566	Chr1	22717059	22717610
						AT2G31460	Chr2	13404775	13405510
						AT1G72430	Chr1	27264910	27265630
						AT4G19190	Chr4	10493246	10496160
						AT5G07340	Chr5	2317212	2319649
						AT5G60966	Chr5	24531666	24531738
						AT2G05400	Chr2	1974885	1976570
						AT1G05260	Chr1	1529766	1531439
						AT1G79410	Chr1	29867879	29869633
						AT3G60310	Chr3	22287681	22291308
						AT3G59220	Chr3	21894133	21895623
						AT5G07225	Chr5	2268641	2270227
						AT5G37250	Chr5	14750392	14750971
						AT4G23370	Chr4	12206361	12213435
						AT2G03380	Chr2	1028291	1030361
						AT4G15670	Chr4	8929178	8929765
						AT1G03570	Chr1	892513	892585
						AT1G61580	Chr1	22720691	22723152
						AT4G23920	Chr4	12431276	12433864
						AT1G23500	Chr1	8339667	8341072
						AT2G46150	Chr2	18961402	18962376
						AT1G58300	Chr1	21628011	21629996
						AT4G19940	Chr4	10806194	10807532
						AT2G17760	Chr2	7713313	7716464
						AT5G38990	Chr5	15608813	15611598
						AT1G65360	Chr1	24281336	24282151
						AT3G26570	Chr3	9756190	9758633
						AT1G01550	Chr1	199638	201775
						AT1G20320	Chr1	7033656	7034874
						AT3G09680	Chr3	2969044	2970371
						AT3G13380	Chr3	4346556	4350923
						AT4G05310	Chr4	2714764	2716012
						AT5G53720	Chr5	21806621	21807012
						AT1G31130	Chr1	11114700	11116195
						AT1G55265	Chr1	20617312	20618005
						AT1G71696	Chr1	26966886	26970572
						AT3G09410	Chr3	2897637	2901019
						AT4G17975	Chr4	9978105	9978177
						AT5G26040	Chr5	9099156	9101636
						AT1G51270	Chr1	19007509	19011272
						AT5G65370	Chr5	26121707	26122749
						AT2G31005	Chr2	13193503	13193797
						AT2G31530	Chr2	13427010	13430465
						AT4G00710	Chr4	290047	293453
						AT5G10170	Chr5	3187276	3190251
						AT1G31330	Chr1	11214823	11216037
						AT2G22190	Chr2	9433764	9436544
						AT2G31180	Chr2	13286720	13288176
						AT3G28321	Chr3	10583133	10583277
						AT4G27400	Chr4	13705340	13706668
						AT4G37310	Chr4	17555926	17558943
						AT5G44345	Chr5	17862112	17863079
						AT1G67400	Chr1	25247987	25250734
						AT4G02290	Chr4	1002393	1005253
						AT4G16650	Chr4	9372476	9376409
						AT5G26930	Chr5	9479465	9480200
						AT2G31110	Chr2	13258328	13262099
						AT2G34970	Chr2	14746306	14748781
						AT2G35000	Chr2	14751573	14753319
						AT2G26440	Chr2	11247382	11249493
						AT1G17590	Chr1	6050192	6052568
						AT5G50460	Chr5	20551436	20552566
						AT3G09930	Chr3	3053259	3055410
						AT3G10590	Chr3	3310423	3311311
						AT3G61270	Chr3	22678150	22680379
						AT4G16080	Chr4	9101347	9102887
						AT5G64780	Chr5	25900558	25902127
						AT5G45680	Chr5	18530879	18532337
						AT1G10610	Chr1	3506185	3509006
						AT2G43120	Chr2	17927263	17928984
						AT3G23870	Chr3	8619191	8621907
						AT1G32060	Chr1	11532532	11534639
						AT2G25920	Chr2	11054290	11056042
						AT2G44890	Chr2	18508270	18510364
						AT3G55170	Chr3	20452909	20454342
						AT4G34800	Chr4	16596859	16597144
						AT1G19660	Chr1	6799980	6802685
						AT3G59390	Chr3	21946117	21948372
						AT1G31880	Chr1	11445489	11450189
						AT1G01380	Chr1	147152	147942
						AT1G29390	Chr1	10286292	10288103
						AT3G27500	Chr3	10182832	10185081
						AT1G26670	Chr1	9215900	9218010
						AT4G27250	Chr4	13642675	13644479
						AT5G38250	Chr5	15280642	15282709
						AT4G03565	Chr4	1586746	1587734
						AT1G21380	Chr1	7485635	7488713
						AT1G30270	Chr1	10654856	10658897
						AT2G24255	Chr2	10315514	10317353
						AT4G02740	Chr4	1217590	1220857
						AT1G29690	Chr1	10379019	10382123
						AT4G00752	Chr4	317563	320895
						AT4G24420	Chr4	12627095	12627606
						AT5G46890	Chr5	19036295	19036916
						AT5G20240	Chr5	6829041	6831515
						AT1G65390	Chr1	24292477	24294631
						AT1G69540	Chr1	26145043	26147571
						AT4G19410	Chr4	10580892	10585861
						AT3G09630	Chr3	2953736	2955748
						AT3G23770	Chr3	8565493	8567496
						AT3G29385	Chr3	11284394	11285402
						AT4G14560	Chr4	8361057	8361986
						AT1G55590	Chr1	20769319	20771871
						AT4G12850	Chr4	7536974	7538276
						AT5G10630	Chr5	3360116	3364619
						AT2G32100	Chr2	13647851	13648785
						AT3G27160	Chr3	10017475	10019090
						AT4G12250	Chr4	7289191	7290902
						AT3G49390	Chr3	18314526	18317998
						AT4G33000	Chr4	15924348	15926628
						AT5G40316	Chr5	16119295	16120018
						AT1G60983	Chr1	22455319	22455589
						AT4G15040	Chr4	8581372	8584122
						AT5G52120	Chr5	21176421	21180310
						AT5G05930	Chr5	1779973	1783412
						AT1G14685	Chr1	5042322	5044294
						AT1G54770	Chr1	20434638	20436008
						AT1G70944	Chr1	26749136	26749253
						AT2G40880	Chr2	17057401	17058122
						AT5G22890	Chr5	7653256	7654724
						AT1G51190	Chr1	18977283	18980618
						AT4G15990	Chr4	9061268	9061676
						AT4G10590	Chr4	6538540	6543448
						AT1G09000	Chr1	2891036	2895182
						AT2G30350	Chr2	12934149	12935773
						AT1G14170	Chr1	4843233	4845847
						AT5G03600	Chr5	912806	914226
						AT1G78500	Chr1	29531645	29535177
						AT4G35220	Chr4	16752570	16754305
						AT5G13070	Chr5	4147635	4149252
						AT1G79860	Chr1	30042091	30044175
						AT2G22970	Chr2	9774852	9778528
						AT5G07040	Chr5	2190343	2190823
						AT5G11170	Chr5	3553116	3556977
						AT4G15730	Chr4	8951532	8957632
						AT1G79830	Chr1	30027669	30033901
						AT1G14570	Chr1	4983534	4987375
						AT3G58540	Chr3	21648592	21649390
						AT3G02160	Chr3	394069	395984
						AT4G03610	Chr4	1604938	1606982
						AT4G15735	Chr4	8963040	8963583
						AT1G80110	Chr1	30135380	30136956
						AT4G10410	Chr4	6448982	6449998
						AT4G02280	Chr4	994926	998967
						AT2G25780	Chr2	10995140	10996024
						AT3G55910	Chr3	20742898	20743479
						AT1G58360	Chr1	21676529	21680502
						AT5G63850	Chr5	25551054	25553520
						AT3G02230	Chr3	415392	417547
						AT3G22790	Chr3	8052317	8058764
						AT1G65720	Chr1	24440258	24441073
						AT5G41500	Chr5	16604001	16605213
						AT1G02680	Chr1	580624	582310
						AT4G27710	Chr4	13828431	13830596
						AT5G02100	Chr5	413519	416225
						AT2G35540	Chr2	14927157	14928930
						AT5G51470	Chr5	20907286	20909340
						AT5G54310	Chr5	22057051	22061270
						AT2G34820	Chr2	14689623	14690879
						AT5G04700	Chr5	1354239	1356754
						AT5G46810	Chr5	18991163	18993376
						AT5G41620	Chr5	16646329	16648968
						AT3G06985	Chr3	2205391	2205706
						AT4G20240	Chr4	10931492	10934212
						AT2G46110	Chr2	18954569	18956530
						AT5G62110	Chr5	24942168	24946081
						AT1G12190	Chr1	4132966	4134094
						AT3G46980	Chr3	17307002	17309938
						AT5G11130	Chr5	3542319	3544724
						AT2G20150	Chr2	8697299	8699299
						AT5G53560	Chr5	21759366	21760578
						AT1G74870	Chr1	28126927	28128463
						AT4G38830	Chr4	18122325	18124943
						AT1G11560	Chr1	3881787	3882819
						AT4G00300	Chr4	126508	130399
						AT4G20070	Chr4	10861454	10864696
						AT3G01325	Chr3	123368	123741
						AT4G02670	Chr4	1176189	1178489
						AT3G61560	Chr3	22777828	22780191
						AT5G59100	Chr5	23858893	23862129
						AT3G10960	Chr3	3424812	3426997
						AT3G25800	Chr3	9422587	9426044
						AT4G30450	Chr4	14886026	14886675
						AT3G20670	Chr3	7229406	7230146
						AT2G39420	Chr2	16460363	16463061
						AT1G67035	Chr1	25018076	25019057
						AT2G48090	Chr2	19669109	19669764
						AT3G50770	Chr3	18873957	18874780
						AT5G17750	Chr5	5858694	5860041
						AT1G31380	Chr1	11240450	11241099
						AT2G41470	Chr2	17289951	17293749
						AT2G41860	Chr2	17467343	17469786
						AT5G64060	Chr5	25633535	25635781
						AT5G51460	Chr5	20900976	20904539
						AT2G32340	Chr2	13732246	13734534
						AT4G28670	Chr4	14151386	14153935
						AT4G09850	Chr4	6192511	6193130
						AT3G04550	Chr3	1225921	1227436
						AT4G33020	Chr4	15932602	15934267
						AT1G11545	Chr1	3878549	3880361
						AT4G16695	Chr4	9394182	9395517
						AT2G35810	Chr2	15049149	15050323
						AT5G04460	Chr5	1259530	1264025
						AT5G46140	Chr5	18704996	18706708
						AT3G22830	Chr3	8078819	8081051
						AT3G60140	Chr3	22216671	22220824
						AT2G32830	Chr2	13927698	13929713
						AT1G66540	Chr1	24824458	24826670
						AT3G09200	Chr3	2823089	2825114
						AT2G41000	Chr2	17111444	17113636
						AT4G27460	Chr4	13732909	13734304
						AT4G20990	Chr4	11219771	11221126
						AT5G60966	Chr5	24531666	24531738
						AT5G56200	Chr5	22747767	22749249
						AT5G13330	Chr5	4272059	4274660
						AT1G06010	Chr1	1822617	1823997
						AT1G78460	Chr1	29518315	29519323
						AT2G42160	Chr2	17574640	17577463
						AT3G53160	Chr3	19702455	19703976
						AT3G25170	Chr3	9165743	9166253
						AT3G06778	Chr3	2140102	2141533
						AT1G33880	Chr1	12303861	12304911
						AT1G70220	Chr1	26446135	26448009
						AT1G20340	Chr1	7042428	7043363
						AT1G59670	Chr1	21930009	21931366
						AT5G56840	Chr5	22980692	22982342
						AT3G48960	Chr3	18150443	18151412
						AT5G39430	Chr5	15775301	15777599
						AT1G23965	Chr1	8480421	8481486
						AT5G40270	Chr5	16093171	16097232
						AT5G20230	Chr5	6826505	6827629
						AT3G21950	Chr3	7734395	7736394
						AT1G67440	Chr1	25263803	25265719
						AT1G54550	Chr1	20369650	20370986
						AT3G11285	Chr3	3535145	3535218
						AT3G26310	Chr3	9641088	9642779
						AT2G35970	Chr2	15109006	15109773
						AT5G64050	Chr5	25629854	25633209
						AT1G60390	Chr1	22247473	22249636
						AT1G44446	Chr1	16848358	16851224
						AT1G26150	Chr1	9039627	9043288
						AT2G46140	Chr2	18959077	18960547
						AT2G25540	Chr2	10866821	10872077
						AT1G61563	Chr1	22714920	22715448
						AT3G60450	Chr3	22340956	22342315
						AT5G50060	Chr5	20362549	20363461
						AT1G31840	Chr1	11423905	11426714
						AT1G77250	Chr1	29020264	29023474
						AT1G59660	Chr1	21924692	21929424
						AT4G04950	Chr4	2517665	2519977
						AT4G10260	Chr4	6371376	6372770
						AT5G11560	Chr5	3709480	3714059
						AT1G53970	Chr1	20148418	20148898
						AT5G06760	Chr5	2089491	2090430
						AT1G28390	Chr1	9966185	9968301
						AT1G79310	Chr1	29833920	29835545
						AT4G16680	Chr4	9387392	9390774
						AT1G18300	Chr1	6299686	6301086
						AT3G04210	Chr3	1105962	1108069
						AT1G03600	Chr1	898875	899655
						AT1G01290	Chr1	114285	116108
						AT4G16070	Chr4	9096688	9100983
						AT3G27900	Chr3	10352904	10353639
						AT2G19120	Chr2	8287035	8292498
						AT3G57610	Chr3	21334283	21336674
						AT4G31875	Chr4	15411700	15412289
						AT4G15270	Chr4	8716600	8717796
						AT3G50470	Chr3	18729053	18730269
						AT1G07090	Chr1	2173951	2174894
						AT3G60450	Chr3	22340956	22342315
						AT3G53470	Chr3	19822725	19823493
						AT4G00420	Chr4	181322	184387
						AT5G22545	Chr5	7483252	7483811
						AT1G73160	Chr1	27506533	27507994
						AT5G06230	Chr5	1884927	1887121
						AT1G31240	Chr1	11163857	11164928
						AT4G08160	Chr4	5159033	5162774
						AT3G01170	Chr3	57640	58909
						AT1G04450	Chr1	1208520	1209874
						AT3G09670	Chr3	2966374	2968972
						AT3G05625	Chr3	1632283	1634139
						AT4G01535	Chr4	669338	669830
[truncated: 2 more rows]
