# Supplementary material for: Polycomb-dependent differential chromatin compartmentalization determines gene coregulation in Arabidopsis
Source: HighWire-hosted journal article supplement (doi:10.1101/gr.273771.120), 2021-06-03
Supplement: Supplemental_Table_S21.xlsx [file Supplemental_Table_S21.xlsx]

## Sheet: S21
Supplementary Table S21: Col-0_clf_LogOdds_Figure 5F
			Log Odds Ratio
	Gene1_Hypo_H3K27me3	Gene1_NA
Gene2_Hypo_H3K27me3	1967	2389
Gene2_NA	2314	11576
	0.823357	4.11892	2.04227
	0.199896
	Gene1_Up	Gene1_NA
Gene2_Hypo_H3K27me3	320	50
Gene2_NA	733	241
	6.4	2.10423	1.07329
	3.04149
	Gene1_Hypo_H3K27me3	Gene1_NA
Gene2_Up	283	746
Gene2_NA	34	219
	0.379357	2.4435	1.28895
	0.155251
	Gene1_down	Gene1_NA
Gene2_Hypo_H3K27me3	50	320
Gene2_NA	241	733
	0.15625	0.475233	-1.07329
	0.328786
	Gene1_Hypo_H3K27me3	Gene1_NA
Gene2_down	34	219
Gene2_NA	283	746
	0.155251	0.409249	-1.28895
	0.379357
	Gene1_Down	Gene1_NA
Gene2_up	10	91
Gene2_NA	4	7
	0.10989	0.192308	-2.37851
	0.571429
	Gene1_Up	Gene1_NA
Gene2_DOWN	7	4
Gene2_NA	91	10
	1.75	0.192308	-2.37851
	9.1
	Gene1_Down	Gene1_NA
Gene2_Down	4	7
Gene2_NA	10	91
	0.571429	5.2	2.37851
	0.10989
	Gene1_Up	Gene1_NA
Gene2_Up	91	10
Gene2_NA	7	4
	9.1	5.2	2.37851
	1.75
