# Supplementary material for: Polycomb-dependent differential chromatin compartmentalization determines gene coregulation in Arabidopsis
Source: HighWire-hosted journal article supplement (doi:10.1101/gr.273771.120), 2021-06-03
Supplement: Supplemental_Table_S22.xlsx [file Supplemental_Table_S22.xlsx]

## Sheet: S22
Supplementary Table S22: MACS2 Peakcalling for H3K9ac in clf mutant
PeakID (cmd=annotatePeaks.pl merged_clf_H3K9_q0.05_with_ctrl_for_homer.txt tair10)	Chr	Start	End	Strand	Peak Score	Focus Ratio/Region Size	Annotation	Detailed Annotation	Distance to TSS	Nearest PromoterID	Entrez ID	Nearest Unigene	Nearest Refseq	Nearest Ensembl	Gene Name	Gene Alias	Gene Description	Gene Type
merged_clf_H3K9_q_0.05_with_ctrl.peaks_peak_12254	4	2660360	2661051	+	340	NA	intron (AT4G05150.1, intron 1 of 1)	intron (AT4G05150.1, intron 1 of 1)	549	AT4G05150.1	825863	At.4069	NM_116754		AT4G05150	C17L7.70|C17L7_70	Octicosapeptide/Phox/Bem1p family protein	protein-coding
merged_clf_H3K9_q_0.05_with_ctrl.peaks_peak_12553	4	7385907	7386645	+	340	NA	exon (AT4G12450.1, exon 1 of 1)	exon (AT4G12450.1, exon 1 of 1)	655	AT4G12450.1	826857	At.33472	NM_117315		AT4G12450	T1P17.40|T1P17_40	zinc finger (C2H2 type) family protein	protein-coding
merged_clf_H3K9_q_0.05_with_ctrl.peaks_peak_7214	2	16018245	16019454	+	340	NA	intron (AT2G38250.1, intron 1 of 1)	intron (AT2G38250.1, intron 1 of 1)	639	AT2G38250.1	818404	At.28319	NM_129382		AT2G38250	F16M14.18|F16M14_18	Homeodomain-like superfamily protein	protein-coding
merged_clf_H3K9_q_0.05_with_ctrl.peaks_peak_144	1	572291	574956	+	336	NA	exon (AT1G02660.1, exon 2 of 5)	exon (AT1G02660.1, exon 2 of 5)	1462	AT1G02660.1	839544	At.26191	NM_100146		AT1G02660	T14P4.6|T14P4_6	alpha/beta-Hydrolases superfamily protein	protein-coding
merged_clf_H3K9_q_0.05_with_ctrl.peaks_peak_2718	1	17295596	17296251	+	334	NA	promoter-TSS (AT1G07323.1)	promoter-TSS (AT1G07323.1)	84	AT1G07323.1	28716635		NR_139228		AT1G07323	-	ncRNA	ncRNA
merged_clf_H3K9_q_0.05_with_ctrl.peaks_peak_14699	4	17768113	17769342	+	333	NA	intron (AT4G37790.1, intron 1 of 2)	intron (AT4G37790.1, intron 1 of 2)	685	AT4G37790.1	829935	At.23912	NM_119941		HAT22	HOMEOBOX PROTEIN|T28I19.70|T28I19_70	Homeobox-leucine zipper protein family	protein-coding
merged_clf_H3K9_q_0.05_with_ctrl.peaks_peak_5459	2	4006224	4006996	+	333	NA	Intergenic	Intergenic	-6194	AT2G05505.1	28717655		NR_140083		AT2G05505	-	ncRNA	ncRNA
merged_clf_H3K9_q_0.05_with_ctrl.peaks_peak_9119	3	4377177	4378330	+	333	NA	promoter-TSS (AT3G13440.3)	promoter-TSS (AT3G13440.3)	-585	AT3G13440.2	820545	At.27985	NM_112189		AT3G13440	-	S-adenosyl-L-methionine-dependent methyltransferases superfamily protein	protein-coding
merged_clf_H3K9_q_0.05_with_ctrl.peaks_peak_12262	4	2718174	2720222	+	332	NA	exon (AT4G05320.2, exon 2 of 2)	exon (AT4G05320.2, exon 2 of 2)	986	AT4G05320.4	825880	At.23108	NM_116771		UBQ10	C17L7.240|C17L7_240|UBI10|polyubiquitin 10|ubiquitin 10	polyubiquitin 10	protein-coding
merged_clf_H3K9_q_0.05_with_ctrl.peaks_peak_13027	4	9991922	9994339	+	331	NA	intron (AT4G18010.2, intron 5 of 8)	intron (AT4G18010.2, intron 5 of 8)	1303	AT4G18010.2	827526	At.2057	NM_117911		IP5PII	4|5)P3 5-PHOSPHATASE II|5PTASE2|AT5PTASE2|INOSITOL POLYPHOSPHATE 5-PHOSPHATASE II|INOSITOL(1|T6K21.190|T6K21_190|myo-inositol polyphosphate 5-phosphatase 2	myo-inositol polyphosphate 5-phosphatase 2	protein-coding
merged_clf_H3K9_q_0.05_with_ctrl.peaks_peak_8239	3	634682	636245	+	328	NA	exon (AT3G02880.1, exon 1 of 3)	exon (AT3G02880.1, exon 1 of 3)	998	AT3G02880.1	821198	At.24310	NM_111157		AT3G02880	F13E7.17|F13E7_17	Leucine-rich repeat protein kinase family protein	protein-coding
merged_clf_H3K9_q_0.05_with_ctrl.peaks_peak_14899	4	18562735	18563816	+	327	NA	exon (AT4G40050.2, exon 1 of 9)	exon (AT4G40050.2, exon 1 of 9)	706	AT4G40050.2	830168	At.2870	NM_120170		AT4G40050	T5J17.220|T5J17_220	signal transducer, putative (DUF3550/UPF0682)	protein-coding
merged_clf_H3K9_q_0.05_with_ctrl.peaks_peak_11560	3	22198008	22199037	+	326	NA	intron (AT3G60110.1, intron 1 of 2)	intron (AT3G60110.1, intron 1 of 2)	993	AT3G60110.1	825181	At.26330	NM_115874		AT3G60110	-	DNA-binding bromodomain-containing protein	protein-coding
merged_clf_H3K9_q_0.05_with_ctrl.peaks_peak_14517	4	17039929	17041099	+	325	NA	exon (AT4G36010.1, exon 1 of 2)	exon (AT4G36010.1, exon 1 of 2)	617	AT4G36010.2	829757	At.2222	NM_119768		AT4G36010	T19K4.140|T19K4_140	Pathogenesis-related thaumatin superfamily protein	protein-coding
merged_clf_H3K9_q_0.05_with_ctrl.peaks_peak_10557	3	17254399	17255160	+	324	NA	promoter-TSS (AT3G07555.1)	promoter-TSS (AT3G07555.1)	79	AT3G07555.1	28719006		NR_141333		AT3G07555	-	ncRNA	ncRNA
merged_clf_H3K9_q_0.05_with_ctrl.peaks_peak_11780	3	23172931	23174740	+	324	NA	exon (AT3G62660.1, exon 1 of 1)	exon (AT3G62660.1, exon 1 of 1)	1081	AT3G62660.1	825440	At.4823	NM_116131		GATL7	galacturonosyltransferase-like 7	galacturonosyltransferase-like 7	protein-coding
merged_clf_H3K9_q_0.05_with_ctrl.peaks_peak_12278	4	3765933	3766548	+	324	NA	exon (AT4G06634.1, exon 2 of 6)	exon (AT4G06634.1, exon 2 of 6)	338	AT4G06634.3	826093	At.47264	NM_178992		YY1	AtYY1|Yin Yang 1	zinc finger (C2H2 type) family protein	protein-coding
merged_clf_H3K9_q_0.05_with_ctrl.peaks_peak_11251	3	20752814	20753234	+	322	NA	TTS (AT3G55950.1)	TTS (AT3G55950.1)	3666	AT3G55950.1	824761	At.34973	NM_115453		CCR3	ATCRR3|CRINKLY4 related 3	CRINKLY4 related 3	protein-coding
merged_clf_H3K9_q_0.05_with_ctrl.peaks_peak_15293	5	1609209	1610942	+	320	NA	exon (AT5G05440.1, exon 1 of 1)	exon (AT5G05440.1, exon 1 of 1)	1087	AT5G05440.1	830427	At.9146	NM_120626		PYL5	AtPYL5|K18I23.25|K18I23_25|PYRABACTIN RESISTANCE 1-LIKE 5|RCAR8|regulatory component of ABA receptor 8	Polyketide cyclase/dehydrase and lipid transport superfamily protein	protein-coding
merged_clf_H3K9_q_0.05_with_ctrl.peaks_peak_14156	4	15487946	15489798	+	320	NA	exon (AT4G32020.1, exon 1 of 1)	exon (AT4G32020.1, exon 1 of 1)	958	AT4G32020.1	829333	At.25285	NM_119354		AT4G32020	F10N7.170|F10N7_170	serine/arginine repetitive matrix-like protein	protein-coding
merged_clf_H3K9_q_0.05_with_ctrl.peaks_peak_12245	4	2587970	2589342	+	319	NA	exon (AT4G05050.3, exon 2 of 2)	exon (AT4G05050.3, exon 2 of 2)	528	AT4G05050.3	825847	At.24970	NM_116744		UBQ11	C17L7.6|ubiquitin 11	ubiquitin 11	protein-coding
merged_clf_H3K9_q_0.05_with_ctrl.peaks_peak_1800	1	7956793	7958415	+	319	NA	exon (AT1G22530.1, exon 1 of 4)	exon (AT1G22530.1, exon 1 of 4)	860	AT1G22530.2	838859	At.25355	NM_102102		PATL2	F12K8.13|F12K8_13|PATELLIN 2	PATELLIN 2	protein-coding
merged_clf_H3K9_q_0.05_with_ctrl.peaks_peak_8443	3	1514289	1515495	+	317	NA	promoter-TSS (AT3G05320.1)	promoter-TSS (AT3G05320.1)	27	AT3G05320.1	819696	At.40691	NM_111405		AT3G05320	T12H1.29|T12H1_29	O-fucosyltransferase family protein	protein-coding
merged_clf_H3K9_q_0.05_with_ctrl.peaks_peak_48	1	199729	201387	+	317	NA	exon (AT1G01550.1, exon 3 of 3)	exon (AT1G01550.1, exon 3 of 3)	928	AT1G01550.2	839536	At.19713	NM_100037		BPS1	BYPASS 1|F22L4.9|F22L4_9	BPS1-like protein (DUF793)	protein-coding
merged_clf_H3K9_q_0.05_with_ctrl.peaks_peak_12983	4	9759377	9760432	+	316	NA	exon (AT4G17500.1, exon 1 of 1)	exon (AT4G17500.1, exon 1 of 1)	701	AT4G17500.1	827464	At.23185	NM_117855		ERF-1	ATERF-1|AtERF#100|DL4785W|ERF1A|FCAALL.123|ethylene responsive element binding factor 1	ethylene responsive element binding factor 1	protein-coding
merged_clf_H3K9_q_0.05_with_ctrl.peaks_peak_2153	1	9886253	9887387	+	316	NA	exon (AT1G28280.2, exon 1 of 2)	exon (AT1G28280.2, exon 1 of 2)	658	AT1G28280.1	839722	At.16033	NM_102593		AT1G28280	F3H9.7|F3H9_7|MPK3/6-targeted VQP 1|MVQ1	VQ motif-containing protein	protein-coding
merged_clf_H3K9_q_0.05_with_ctrl.peaks_peak_730	1	3252357	3255433	+	316	NA	exon (AT1G09970.2, exon 1 of 2)	exon (AT1G09970.2, exon 1 of 2)	1578	AT1G09970.2	837531	At.22076	NM_100871		LRR XI-23	F21M12.36|F21M12_36|RLK7|receptor-like kinase 7	Leucine-rich receptor-like protein kinase family protein	protein-coding
merged_clf_H3K9_q_0.05_with_ctrl.peaks_peak_14638	4	17540544	17541849	+	315	NA	TTS (AT4G37270.1)	TTS (AT4G37270.1)	706	AT4G37260.1	829880	At.56989	NM_119889		MYB73	AP22.97|AP22_97|ATMYB73|myb domain protein 73	myb domain protein 73	protein-coding
merged_clf_H3K9_q_0.05_with_ctrl.peaks_peak_1961	1	8911230	8912361	+	315	NA	exon (AT1G25400.2, exon 2 of 2)	exon (AT1G25400.2, exon 2 of 2)	847	AT1G25400.2	839126	At.23261	NM_102351		AT1G25400	F2J7.13|F2J7_13	transmembrane protein	protein-coding
merged_clf_H3K9_q_0.05_with_ctrl.peaks_peak_15207	5	1290453	1291103	+	314	NA	TTS (AT5G04510.2)	TTS (AT5G04510.2)	326	AT5G04520.1	830331		NM_120534		AT5G04520	T32M21.120|T32M21_120	3-oxoacyl-acyl-carrier synthase-like protein (Protein of unknown function DUF455)	protein-coding
merged_clf_H3K9_q_0.05_with_ctrl.peaks_peak_9622	3	6714634	6715922	+	314	NA	exon (AT3G19380.1, exon 1 of 1)	exon (AT3G19380.1, exon 1 of 1)	900	AT3G19380.1	821472	At.5707	NM_112825		PUB25	plant U-box 25	plant U-box 25	protein-coding
merged_clf_H3K9_q_0.05_with_ctrl.peaks_peak_7485	2	17261317	17262820	+	314	NA	TTS (AT2G09265.1)	TTS (AT2G09265.1)	949	AT2G41410.1	818739	At.24025	NM_129704		AT2G41410	F13H10.4|F13H10_4	Calcium-binding EF-hand family protein	protein-coding
merged_clf_H3K9_q_0.05_with_ctrl.peaks_peak_13402	4	12087324	12087896	+	314	NA	exon (AT4G23060.1, exon 1 of 4)	exon (AT4G23060.1, exon 1 of 4)	712	AT4G23060.1	828405	At.23452	NM_118435		IQD22	F7H19.250|F7H19_250|IQ-domain 22	IQ-domain 22	protein-coding
merged_clf_H3K9_q_0.05_with_ctrl.peaks_peak_9280	3	5121450	5123294	+	314	NA	exon (AT3G15210.1, exon 1 of 1)	exon (AT3G15210.1, exon 1 of 1)	1069	AT3G15210.1	820752	At.47551	NM_112384		ERF4	ATERF-4|ATERF4|ETHYLENE RESPONSIVE ELEMENT BINDING FACTOR 4|RAP2.5|RELATED TO AP2 5|ethylene responsive element binding factor 4	ethylene responsive element binding factor 4	protein-coding
merged_clf_H3K9_q_0.05_with_ctrl.peaks_peak_6084	2	9924940	9926346	+	313	NA	promoter-TSS (AT2G23321.1)	promoter-TSS (AT2G23321.1)	710	AT2G23320.2	816864	At.24883	NM_127896		WRKY15	AtWRKY15|T20D16.5|T20D16_5|WRKY DNA-binding protein 15	WRKY DNA-binding protein 15	protein-coding
merged_clf_H3K9_q_0.05_with_ctrl.peaks_peak_9963	3	8686684	8687570	+	313	NA	exon (AT3G24050.1, exon 2 of 2)	exon (AT3G24050.1, exon 2 of 2)	1388	AT3G24050.1	821990	At.24370	NM_113310		GATA1	GATA transcription factor 1	GATA transcription factor 1	protein-coding
merged_clf_H3K9_q_0.05_with_ctrl.peaks_peak_4863	1	29387924	29388870	+	313	NA	exon (AT1G78100.1, exon 1 of 1)	exon (AT1G78100.1, exon 1 of 1)	725	AT1G78100.1	844146	At.22971	NM_106460		AUF1	T11I11.4|T11I11_4|auxin up-regulated f-box protein 1	F-box family protein	protein-coding
merged_clf_H3K9_q_0.05_with_ctrl.peaks_peak_14157	4	15490737	15492993	+	312	NA	intron (AT4G32030.2, intron 1 of 2)	intron (AT4G32030.2, intron 1 of 2)	1125	AT4G32030.2	829334	At.1884	NM_119355		AT4G32030	F10N7.160|F10N7_160	hypothetical protein	protein-coding
merged_clf_H3K9_q_0.05_with_ctrl.peaks_peak_18899	5	25110062	25111633	+	312	NA	exon (AT5G62560.1, exon 1 of 1)	exon (AT5G62560.1, exon 1 of 1)	1007	AT5G62560.1	836376	At.29043	NM_125650		AT5G62560	K19B1.17|K19B1_17	RING/U-box superfamily protein with ARM repeat domain-containing protein	protein-coding
merged_clf_H3K9_q_0.05_with_ctrl.peaks_peak_14113	4	15290172	15291526	+	312	NA	exon (AT4G31550.1, exon 1 of 3)	exon (AT4G31550.1, exon 1 of 3)	690	AT4G31550.1	829282	At.24683	NM_119304		WRKY11	ATWRKY11|F3L17.120|F3L17_120|WRKY DNA-binding protein 11	WRKY DNA-binding protein 11	protein-coding
merged_clf_H3K9_q_0.05_with_ctrl.peaks_peak_15125	5	832437	834400	+	311	NA	intron (AT5G03380.2, intron 2 of 3)	intron (AT5G03380.2, intron 2 of 3)	871	AT5G03380.2	831854	At.19989	NM_120417		AT5G03380	F12E4.120|F12E4_120	Heavy metal transport/detoxification superfamily protein	protein-coding
merged_clf_H3K9_q_0.05_with_ctrl.peaks_peak_14766	4	18025689	18026951	+	311	NA	promoter-TSS (AT4G38550.5)	promoter-TSS (AT4G38550.5)	113	AT4G38550.4	830012	At.19022	NM_120016		AT4G38550	F20M13.110|F20M13_110	phospholipase-like protein (PEARLI 4) family protein	protein-coding
merged_clf_H3K9_q_0.05_with_ctrl.peaks_peak_9962	3	8685943	8686458	+	311	NA	exon (AT3G24050.1, exon 1 of 2)	exon (AT3G24050.1, exon 1 of 2)	461	AT3G24050.1	821990	At.24370	NM_113310		GATA1	GATA transcription factor 1	GATA transcription factor 1	protein-coding
merged_clf_H3K9_q_0.05_with_ctrl.peaks_peak_11877	4	143127	144482	+	310	NA	exon (AT4G00330.2, exon 4 of 7)	exon (AT4G00330.2, exon 4 of 7)	757	AT4G00330.1	828125	At.27082	NM_116255		CRCK2	A_IG005I10.8|A_IG005I10_8|F5I10.8|F5I10_8|calmodulin-binding receptor-like cytoplasmic kinase 2	calmodulin-binding receptor-like cytoplasmic kinase 2	protein-coding
merged_clf_H3K9_q_0.05_with_ctrl.peaks_peak_5218	2	385222	387177	+	310	NA	intron (AT2G01850.1, intron 3 of 3)	intron (AT2G01850.1, intron 3 of 3)	1028	AT2G01850.1	814716	At.21536	NM_126246		EXGT-A3	ATXTH27|T23K3.4|T23K3_4|XTH27|XYLOGLUCAN ENDOTRANSGLUCOSYLASE/HYDROLASE 27|endoxyloglucan transferase A3	endoxyloglucan transferase A3	protein-coding
merged_clf_H3K9_q_0.05_with_ctrl.peaks_peak_6238	2	10850104	10850484	+	309	NA	exon (AT2G25490.1, exon 1 of 2)	exon (AT2G25490.1, exon 1 of 2)	503	AT2G25490.1	817087	At.24288	NM_128106		EBF1	EIN3-binding F box protein 1|F13B15.15|F13B15_15|FBL6	EIN3-binding F box protein 1	protein-coding
merged_clf_H3K9_q_0.05_with_ctrl.peaks_peak_6565	2	12776506	12777658	+	309	NA	exon (AT2G29970.1, exon 1 of 3)	exon (AT2G29970.1, exon 1 of 3)	874	AT2G29970.1	817547	At.22058	NM_128551		AT2G29970	F23F1.11|F23F1_11|SMAX1-like 7|SMXL7	Double Clp-N motif-containing P-loop nucleoside triphosphate hydrolases superfamily protein	protein-coding
merged_clf_H3K9_q_0.05_with_ctrl.peaks_peak_839	1	3777348	3779812	+	308	NA	intron (AT1G11260.1, intron 2 of 3)	intron (AT1G11260.1, intron 2 of 3)	1344	AT1G11260.1	837667	At.24793	NM_100998		STP1	ATSTP1|SUGAR TRANSPORTER 1|T28P6.9|T28P6_9|sugar transporter 1	sugar transporter 1	protein-coding
merged_clf_H3K9_q_0.05_with_ctrl.peaks_peak_6036	2	9704916	9706141	+	308	NA	exon (AT2G22800.1, exon 2 of 3)	exon (AT2G22800.1, exon 2 of 3)	689	AT2G22800.1	816811	At.12844	NM_127845		HAT9	T30L20.6|TRANSCRIPTION FACTOR HAT9	Homeobox-leucine zipper protein family	protein-coding
merged_clf_H3K9_q_0.05_with_ctrl.peaks_peak_14601	4	17400946	17401705	+	308	NA	exon (AT4G36920.2, exon 2 of 11)	exon (AT4G36920.2, exon 2 of 11)	601	AT4G36920.1	829845	At.4638	NM_119856		AP2	AP22.49|AP22_49|APETALA 2|AtAP2|FL1|FLO2|FLORAL HOMEOTIC PROTEIN APETALA 2|FLORAL MUTANT 2|FLOWER 1	Integrase-type DNA-binding superfamily protein	protein-coding
merged_clf_H3K9_q_0.05_with_ctrl.peaks_peak_9992	3	8960359	8962357	+	307	NA	exon (AT3G24550.1, exon 2 of 8)	exon (AT3G24550.1, exon 2 of 8)	1263	AT3G24550.1	822051	At.21723	NM_113366		PERK1	ATPERK1|MOB24.11|proline extensin-like receptor kinase 1|proline-rich extensin-like receptor kinase 1	proline extensin-like receptor kinase 1	protein-coding
merged_clf_H3K9_q_0.05_with_ctrl.peaks_peak_16493	5	7248445	7250446	+	306	NA	TTS (AT5G21930.3)	TTS (AT5G21930.3)	1325	AT5G21940.1	832254	At.21428	NM_147877		AT5G21940	-	hybrid signal transduction histidine kinase M-like protein	protein-coding
merged_clf_H3K9_q_0.05_with_ctrl.peaks_peak_14488	4	16940659	16941777	+	306	NA	TTS (AT4G35740.1)	TTS (AT4G35740.1)	842	AT4G35750.1	829728	At.24014	NM_119741		AT4G35750	F4B14.4	SEC14 cytosolic factor family protein / phosphoglyceride transfer family protein	protein-coding
merged_clf_H3K9_q_0.05_with_ctrl.peaks_peak_5155	2	115014	116750	+	306	NA	exon (AT2G01190.1, exon 1 of 2)	exon (AT2G01190.1, exon 1 of 2)	956	AT2G01190.1	814647	At.19855	NM_126180		PDE331	F10A8.7|F10A8_7|PIGMENT DEFECTIVE 331	Octicosapeptide/Phox/Bem1p family protein	protein-coding
merged_clf_H3K9_q_0.05_with_ctrl.peaks_peak_5436	2	2361452	2362160	+	306	NA	exon (AT2G06050.1, exon 3 of 5)	exon (AT2G06050.1, exon 3 of 5)	343	AT2G06050.3	815160	At.1135	NM_126619		OPR3	11-REDUCTASE|12-OXO-PHYTODIENOATE REDUCTASE|12-OXOPHYTODIENOATE-10|AtOPR3|DDE1|DELAYED DEHISCENCE 1|F5K7.19|F5K7_19|oxophytodienoate-reductase 3	oxophytodienoate-reductase 3	protein-coding
merged_clf_H3K9_q_0.05_with_ctrl.peaks_peak_3428	1	22055962	22057182	+	306	NA	exon (AT1G59910.1, exon 1 of 2)	exon (AT1G59910.1, exon 1 of 2)	696	AT1G59910.1	842285	At.11380	NM_104683		AT1G59910	F23H11.22|F23H11_22	Actin-binding FH2 (formin homology 2) family protein	protein-coding
merged_clf_H3K9_q_0.05_with_ctrl.peaks_peak_6230	2	10833354	10835477	+	306	NA	exon (AT2G25460.2, exon 3 of 4)	exon (AT2G25460.2, exon 3 of 4)	1068	AT2G25460.1	817084	At.27352	NM_128103		AT2G25460	F13B15.12|F13B15_12	EEIG1/EHBP1 protein amino-terminal domain protein	protein-coding
merged_clf_H3K9_q_0.05_with_ctrl.peaks_peak_901	1	4105289	4106791	+	305	NA	intron (AT1G12110.1, intron 3 of 4)	intron (AT1G12110.1, intron 3 of 4)	817	AT1G12110.1	837763	At.19624	NM_101083		NRT1.1	ARABIDOPSIS THALIANA NITRATE TRANSPORTER 1|ATNRT1|ATNRT1.1|AtNPF6.3|B-1|CHL1|CHL1-1|CHLORATE/NITRATE TRANSPORTER|CHLORINA 1|F12F1.1|F12F1_1|NITRATE TRANSPORTER 1|NITRATE/CHLORATE TRANSPORTER|NPF6.3|NRT1|NRT1/ PTR family 6.3|nitrate transporter 1.1	nitrate transporter 1.1	protein-coding
merged_clf_H3K9_q_0.05_with_ctrl.peaks_peak_14903	4	18576576	18577459	+	305	NA	exon (AT4G40070.1, exon 1 of 1)	exon (AT4G40070.1, exon 1 of 1)	801	AT4G40070.1	830170	At.27385	NM_120172		AT4G40070	T5J17.240|T5J17_240	RING/U-box superfamily protein	protein-coding
merged_clf_H3K9_q_0.05_with_ctrl.peaks_peak_5662	2	7576370	7577258	+	305	NA	promoter-TSS (AT2G17442.3)	promoter-TSS (AT2G17442.3)	-863	AT2G17442.1	3768659	At.63232	NM_001036285		AT2G17442	-	hypothetical protein	protein-coding
merged_clf_H3K9_q_0.05_with_ctrl.peaks_peak_10348	3	12448835	12451211	+	305	NA	intron (AT3G30775.1, intron 2 of 4)	intron (AT3G30775.1, intron 2 of 4)	1533	AT3G30775.1	822833	At.24174	NM_113981		ERD5	ARABIDOPSIS THALIANA PROLINE OXIDASE|AT-POX|ATPDH|ATPOX|EARLY RESPONSIVE TO DEHYDRATION 5|PDH1|PRO1|PRODH|PROLINE DEHYDROGENASE|PROLINE OXIDASE|proline dehydrogenase 1	Methylenetetrahydrofolate reductase family protein	protein-coding
merged_clf_H3K9_q_0.05_with_ctrl.peaks_peak_8212	3	556897	557324	+	304	NA	exon (AT3G02610.2, exon 3 of 4)	exon (AT3G02610.2, exon 3 of 4)	1439	AT3G02610.1	820709	At.41109	NM_111129		AT3G02610	F16B3.24|F16B3_24	plant stearoyl-acyl-carrier desaturase family protein	protein-coding
merged_clf_H3K9_q_0.05_with_ctrl.peaks_peak_12288	4	4643905	4644462	+	304	NA	exon (AT4G07825.1, exon 1 of 1)	exon (AT4G07825.1, exon 1 of 1)	436	AT4G07825.1	826264	At.44185	NM_179010		AT4G07825	-	transmembrane protein	protein-coding
merged_clf_H3K9_q_0.05_with_ctrl.peaks_peak_12836	4	9112797	9113695	+	304	NA	intron (AT4G16110.1, intron 1 of 5)	intron (AT4G16110.1, intron 1 of 5)	560	AT4G16110.1	827297	At.21955	NM_117704		RR2	ARR2|DL4095W|FCAALL.287|response regulator 2	response regulator 2	protein-coding
merged_clf_H3K9_q_0.05_with_ctrl.peaks_peak_11883	4	162050	162850	+	303	NA	TTS (AT4G00370.1)	TTS (AT4G00370.1)	372	AT4G03585.1	28719503		NR_141740		AT4G03585	-	ncRNA	ncRNA
merged_clf_H3K9_q_0.05_with_ctrl.peaks_peak_6636	2	13095391	13096312	+	303	NA	promoter-TSS (AT2G30740.15)	promoter-TSS (AT2G30740.15)	-111	AT2G30740.15	817625	At.20728	NM_001336285		AT2G30740	T11J7.13|T11J7_13	Protein kinase superfamily protein	protein-coding
merged_clf_H3K9_q_0.05_with_ctrl.peaks_peak_12099	4	1143949	1144859	+	301	NA	intron (AT4G02600.2, intron 2 of 12)	intron (AT4G02600.2, intron 2 of 12)	516	AT4G02600.2	828229	At.20439	NM_116494		MLO1	ATMLO1|MILDEW RESISTANCE LOCUS O 1|T10P11.12|T10P11_12	Seven transmembrane MLO family protein	protein-coding
merged_clf_H3K9_q_0.05_with_ctrl.peaks_peak_18489	5	23310363	23310918	+	301	NA	exon (AT5G57565.1, exon 1 of 3)	exon (AT5G57565.1, exon 1 of 3)	294	AT5G57565.1	2746216	At.48083	NM_203223		AT5G57565	-	Protein kinase superfamily protein	protein-coding
merged_clf_H3K9_q_0.05_with_ctrl.peaks_peak_4336	1	27148497	27150773	+	301	NA	exon (AT1G72150.1, exon 1 of 4)	exon (AT1G72150.1, exon 1 of 4)	1374	AT1G72150.1	843546	At.43384	NM_105873		PATL1	PATELLIN 1|T9N14.1|T9N14_1	PATELLIN 1	protein-coding
merged_clf_H3K9_q_0.05_with_ctrl.peaks_peak_1486	1	6458088	6460209	+	301	NA	intron (AT1G18720.2, intron 2 of 4)	intron (AT1G18720.2, intron 2 of 4)	1062	AT1G18720.1	838454	At.11916	NM_101730		AT1G18720	F6A14.17|F6A14_17	ER membrane protein, putative (DUF962)	protein-coding
merged_clf_H3K9_q_0.05_with_ctrl.peaks_peak_17884	5	20048563	20049602	+	301	NA	exon (AT5G49440.1, exon 1 of 1)	exon (AT5G49440.1, exon 1 of 1)	843	AT5G49440.1	835004	At.50519	NM_124321		AT5G49440	K7J8.12|K7J8_12	hypothetical protein	protein-coding
merged_clf_H3K9_q_0.05_with_ctrl.peaks_peak_1777	1	7896789	7897584	+	300	NA	TTS (AT1G22370.2)	TTS (AT1G22370.2)	405	AT1G22360.2	838843	At.21323	NM_102086		UGT85A2	AtUGT85A2|UDP-glucosyl transferase 85A2	UDP-glucosyl transferase 85A2	protein-coding
merged_clf_H3K9_q_0.05_with_ctrl.peaks_peak_43	1	180428	182311	+	300	NA	exon (AT1G01490.2, exon 3 of 4)	exon (AT1G01490.2, exon 3 of 4)	1128	AT1G01490.4	839440	At.27454	NM_100031		AT1G01490	F22L4.5|F22L4_5	Heavy metal transport/detoxification superfamily protein	protein-coding
merged_clf_H3K9_q_0.05_with_ctrl.peaks_peak_13593	4	12977296	12978693	+	300	NA	exon (AT4G25390.1, exon 1 of 1)	exon (AT4G25390.1, exon 1 of 1)	653	AT4G25390.2	828642	At.32262	NM_118671		AT4G25390	T30C3.60|T30C3_60	Protein kinase superfamily protein	protein-coding
merged_clf_H3K9_q_0.05_with_ctrl.peaks_peak_6737	2	13656221	13657160	+	300	NA	exon (AT2G32140.1, exon 1 of 3)	exon (AT2G32140.1, exon 1 of 3)	679	AT2G32140.1	817773	At.38115	NM_128773		AT2G32140	F22D22.11|F22D22_11	transmembrane receptor	protein-coding
merged_clf_H3K9_q_0.05_with_ctrl.peaks_peak_17783	5	19397445	19398674	+	300	NA	exon (AT5G47910.1, exon 1 of 8)	exon (AT5G47910.1, exon 1 of 8)	1018	AT5G47910.1	834842	At.23270	NM_124165		RBOHD	ATRBOHD|MCA23.25|MCA23_25|RESPIRATORY BURST OXIDASE|respiratory burst oxidase homologue D	respiratory burst oxidase homologue D	protein-coding
merged_clf_H3K9_q_0.05_with_ctrl.peaks_peak_8640	3	2354760	2356619	+	300	NA	exon (AT3G07360.1, exon 2 of 2)	exon (AT3G07360.1, exon 2 of 2)	515	AT3G07360.10	819924	At.21635	NM_111615		PUB9	ARABIDOPSIS THALIANA PLANT U-BOX 9|ATPUB9|plant U-box 9	plant U-box 9	protein-coding
merged_clf_H3K9_q_0.05_with_ctrl.peaks_peak_14900	4	18571593	18572924	+	299	NA	exon (AT4G40060.1, exon 2 of 3)	exon (AT4G40060.1, exon 2 of 3)	826	AT4G40060.1	830169	At.20863	NM_120171		HB16	ATHB-16|ATHB16|T5J17.230|T5J17_230|homeobox protein 16	homeobox protein 16	protein-coding
merged_clf_H3K9_q_0.05_with_ctrl.peaks_peak_5716	2	7898293	7899178	+	299	NA	exon (AT2G18160.1, exon 1 of 1)	exon (AT2G18160.1, exon 1 of 1)	507	AT2G18160.1	816329	At.23493	NM_127373		bZIP2	ATBZIP2|F8D23.6|F8D23_6|FLORAL TRANSITION AT THE MERISTEM3|FTM3|G-BOX BINDING FACTOR 5|GBF5|TRANSCRIPTION FACTOR GBF5|basic leucine-zipper 2	basic leucine-zipper 2	protein-coding
merged_clf_H3K9_q_0.05_with_ctrl.peaks_peak_10365	3	14811209	14811570	+	299	NA	Intergenic	Intergenic	20215	AT3G06465.1	28718921		NR_141253		AT3G06465	-	ncRNA	ncRNA
merged_clf_H3K9_q_0.05_with_ctrl.peaks_peak_10832	3	18806737	18808176	+	299	NA	exon (AT3G50650.1, exon 1 of 1)	exon (AT3G50650.1, exon 1 of 1)	787	AT3G50650.1	824228	At.42939	NM_114925		AT3G50650	-	GRAS family transcription factor	protein-coding
merged_clf_H3K9_q_0.05_with_ctrl.peaks_peak_11101	3	19996618	19998221	+	299	NA	exon (AT3G54000.3, exon 2 of 4)	exon (AT3G54000.3, exon 2 of 4)	886	AT3G54000.3	824567	At.21821	NM_115260		AT3G54000	-	TIP41-like protein	protein-coding
merged_clf_H3K9_q_0.05_with_ctrl.peaks_peak_8581	3	2129428	2130292	+	298	NA	promoter-TSS (AT3G01885.1)	promoter-TSS (AT3G01885.1)	591	AT3G06750.1	819860	At.18840	NM_111555		AT3G06750	-	hydroxyproline-rich glycoprotein family protein	protein-coding
merged_clf_H3K9_q_0.05_with_ctrl.peaks_peak_5888	2	8911973	8913521	+	298	NA	intron (AT2G20670.1, intron 2 of 2)	intron (AT2G20670.1, intron 2 of 2)	1000	AT2G20670.1	816595	At.23709	NM_127631		AT2G20670	F23N11.1	sugar phosphate exchanger, putative (DUF506)	protein-coding
merged_clf_H3K9_q_0.05_with_ctrl.peaks_peak_232	1	930943	931644	+	298	NA	exon (AT1G03730.1, exon 1 of 1)	exon (AT1G03730.1, exon 1 of 1)	692	AT1G03730.1	839106	At.42527	NM_100252		AT1G03730	F21B7.33	pyrroline-5-carboxylate reductase	protein-coding
merged_clf_H3K9_q_0.05_with_ctrl.peaks_peak_15310	5	1672163	1673625	+	297	NA	TTS (AT5G05598.1)	TTS (AT5G05598.1)	798	AT5G05600.2	830443	At.8725	NM_120642		AT5G05600	MOP10.14|MOP10_14	2-oxoglutarate (2OG) and Fe(II)-dependent oxygenase superfamily protein	protein-coding
merged_clf_H3K9_q_0.05_with_ctrl.peaks_peak_4728	1	28746928	28747819	+	297	NA	exon (AT1G76600.1, exon 1 of 1)	exon (AT1G76600.1, exon 1 of 1)	540	AT1G76600.1	843993	At.19394	NM_106310		AT1G76600	F14G6.20|F14G6_20	poly polymerase	protein-coding
merged_clf_H3K9_q_0.05_with_ctrl.peaks_peak_16944	5	10796748	10798150	+	297	NA	intron (AT5G28770.3, intron 2 of 4)	intron (AT5G28770.3, intron 2 of 4)	786	AT5G28770.4	832990	At.15754	NM_122760		BZO2H3	Arabidopsis thaliana basic leucine zipper 63|AtbZIP63|T32B20.4|T32B20_4	bZIP transcription factor family protein	protein-coding
merged_clf_H3K9_q_0.05_with_ctrl.peaks_peak_8961	3	3698864	3700719	+	297	NA	exon (AT3G11700.1, exon 1 of 3)	exon (AT3G11700.1, exon 1 of 3)	1133	AT3G11700.1	820342	At.22262	NM_112002		FLA18	FASCICLIN-like arabinogalactan protein 18 precursor	FASCICLIN-like arabinogalactan protein 18 precursor	protein-coding
merged_clf_H3K9_q_0.05_with_ctrl.peaks_peak_14599	4	17388873	17389697	+	297	NA	exon (AT4G36900.1, exon 1 of 1)	exon (AT4G36900.1, exon 1 of 1)	636	AT4G36900.1	829843	At.461	NM_119854		RAP2.10	AP22.2|AP22_2|DEAR4|DREB AND EAR MOTIF PROTEIN 4|related to AP2 10	related to AP2 10	protein-coding
merged_clf_H3K9_q_0.05_with_ctrl.peaks_peak_5199	2	296612	298079	+	297	NA	intron (AT2G01670.1, intron 3 of 4)	intron (AT2G01670.1, intron 3 of 4)	870	AT2G01670.1	814696	At.25360	NM_126228		NUDT17	T8O11.16|T8O11_16|atnudt17|nudix hydrolase homolog 17	nudix hydrolase homolog 17	protein-coding
merged_clf_H3K9_q_0.05_with_ctrl.peaks_peak_13249	4	11307007	11307458	+	297	NA	TTS (AT4G21200.1)	TTS (AT4G21200.1)	287	AT4G21210.1	827869	At.20726	NM_118240		RP1	ATRP1|F7J7.150|F7J7_150|PPDK REGULATORY PROTEIN|PPDK regulatory protein	PPDK regulatory protein	protein-coding
merged_clf_H3K9_q_0.05_with_ctrl.peaks_peak_15227	5	1373759	1374634	+	297	NA	TTS (AT5G00990.1)	TTS (AT5G00990.1)	523	AT5G00990.1	28720349		NR_142470		AT5G00990	-	ncRNA	ncRNA
merged_clf_H3K9_q_0.05_with_ctrl.peaks_peak_16940	5	10632258	10632930	+	297	NA	Intergenic	Intergenic	-2761	AT5G04795.1	28720666		NR_142787		AT5G04795	-	ncRNA	ncRNA
merged_clf_H3K9_q_0.05_with_ctrl.peaks_peak_643	1	2873510	2875286	+	296	NA	intron (AT1G08930.1, intron 4 of 16)	intron (AT1G08930.1, intron 4 of 16)	933	AT1G08930.2	837414	At.20925	NM_100765		ERD6	EARLY RESPONSE TO DEHYDRATION 6|F7G19.19|F7G19_19	Major facilitator superfamily protein	protein-coding
merged_clf_H3K9_q_0.05_with_ctrl.peaks_peak_3354	1	21425005	21425508	+	296	NA	promoter-TSS (AT1G57850.2)	promoter-TSS (AT1G57850.2)	-225	AT1G57850.2	842160	At.66048	NM_104578		AT1G57850	F12K22.22|F12K22_22	Toll-Interleukin-Resistance (TIR) domain family protein	protein-coding
merged_clf_H3K9_q_0.05_with_ctrl.peaks_peak_16805	5	9054496	9055183	+	296	NA	TTS (AT5G04185.1)	TTS (AT5G04185.1)	416	AT5G25940.1	832663	At.30881	NM_122495		AT5G25940	T1N24.3|T1N24_3	early nodulin-like protein	protein-coding
merged_clf_H3K9_q_0.05_with_ctrl.peaks_peak_16732	5	8558319	8559355	+	296	NA	intron (AT5G24890.1, intron 1 of 1)	intron (AT5G24890.1, intron 1 of 1)	651	AT5G24890.1	832558	At.19706	NM_122398		AT5G24890	F6A4.100|F6A4_100	stress response NST1-like protein	protein-coding
merged_clf_H3K9_q_0.05_with_ctrl.peaks_peak_19148	5	26031236	26032042	+	296	NA	TTS (AT5G65158.1)	TTS (AT5G65158.1)	1564	AT5G65158.1	3771559	At.63376	NM_001037069		PLAT3	PLAT domain protein 3	Lipase/lipooxygenase, PLAT/LH2 family protein	protein-coding
merged_clf_H3K9_q_0.05_with_ctrl.peaks_peak_11474	3	21716102	21716794	+	296	NA	promoter-TSS (AT3G09145.1)	promoter-TSS (AT3G09145.1)	-563	AT3G09145.1	28719192		NR_141512		AT3G09145	-	ncRNA	ncRNA
merged_clf_H3K9_q_0.05_with_ctrl.peaks_peak_6095	2	9989955	9991707	+	296	NA	exon (AT2G23450.2, exon 2 of 4)	exon (AT2G23450.2, exon 2 of 4)	695	AT2G23450.1	816877	At.39289	NM_127909		AT2G23450	F26B6.10|F26B6_10	Protein kinase superfamily protein	protein-coding
merged_clf_H3K9_q_0.05_with_ctrl.peaks_peak_7912	2	19018142	19019255	+	296	NA	TTS (AT2G46320.1)	TTS (AT2G46320.1)	557	AT2G46330.2	819241	At.48601	NM_130196		AGP16	ARABINOGALACTAN PROTEIN 16|ATAGP16|F11C10.2|arabinogalactan protein 16	arabinogalactan protein 16	protein-coding
merged_clf_H3K9_q_0.05_with_ctrl.peaks_peak_11861	4	57356	59197	+	295	NA	exon (AT4G00150.1, exon 1 of 1)	exon (AT4G00150.1, exon 1 of 1)	1219	AT4G00150.1	828208	At.3732	NM_116232		HAM3	ARABIDOPSIS THALIANA HAIRY MERISTEM 3|ATHAM3|F6N15.20|F6N15_20|HAIRY MERISTEM 3|LOM3|LOST MERISTEMS 3|SCL6-IV	GRAS family transcription factor	protein-coding
merged_clf_H3K9_q_0.05_with_ctrl.peaks_peak_12256	4	2661619	2662263	+	295	NA	exon (AT4G05150.1, exon 2 of 2)	exon (AT4G05150.1, exon 2 of 2)	1785	AT4G05150.1	825863	At.4069	NM_116754		AT4G05150	C17L7.70|C17L7_70	Octicosapeptide/Phox/Bem1p family protein	protein-coding
merged_clf_H3K9_q_0.05_with_ctrl.peaks_peak_13335	4	11742306	11743184	+	295	NA	exon (AT4G22190.1, exon 1 of 1)	exon (AT4G22190.1, exon 1 of 1)	573	AT4G22190.1	828310	At.1969	NM_118341		AT4G22190	T10I14.20|T10I14_20	serine/arginine repetitive matrix-like protein	protein-coding
merged_clf_H3K9_q_0.05_with_ctrl.peaks_peak_8048	2	19600345	19601429	+	293	NA	exon (AT2G47860.2, exon 1 of 2)	exon (AT2G47860.2, exon 1 of 2)	939	AT2G47860.3	819398	At.43938	NM_130353		SETH6	F17A22.25	Phototropic-responsive NPH3 family protein	protein-coding
merged_clf_H3K9_q_0.05_with_ctrl.peaks_peak_13972	4	14657053	14658766	+	293	NA	intron (AT4G29950.2, intron 2 of 4)	intron (AT4G29950.2, intron 2 of 4)	861	AT4G29950.2	829118	At.20316	NM_119141		AT4G29950	-	Ypt/Rab-GAP domain of gyp1p superfamily protein	protein-coding
merged_clf_H3K9_q_0.05_with_ctrl.peaks_peak_13468	4	12414091	12415092	+	293	NA	TTS (AT4G23880.1)	TTS (AT4G23880.1)	533	AT4G23870.1	828486	At.47440	NM_118518		AT4G23870	T32A16.40|T32A16_40	hypothetical protein	protein-coding
merged_clf_H3K9_q_0.05_with_ctrl.peaks_peak_15190	5	1205742	1207319	+	293	NA	exon (AT5G04310.1, exon 3 of 6)	exon (AT5G04310.1, exon 3 of 6)	1149	AT5G04310.3	830310	At.26658	NM_120513		AT5G04310	T19N18.40|T19N18_40	Pectin lyase-like superfamily protein	protein-coding
merged_clf_H3K9_q_0.05_with_ctrl.peaks_peak_7505	2	17360516	17362091	+	293	NA	exon (AT2G41640.2, exon 3 of 4)	exon (AT2G41640.2, exon 3 of 4)	884	AT2G41640.2	818762	At.21091	NM_129727		AT2G41640	T32G6.16|T32G6_16	Glycosyltransferase family 61 protein	protein-coding
merged_clf_H3K9_q_0.05_with_ctrl.peaks_peak_5322	2	1122605	1123087	+	293	NA	TTS (AT2G03700.1)	TTS (AT2G03700.1)	252	AT2G04555.1	28717578		NR_140016		AT2G04555	-	ncRNA	ncRNA
merged_clf_H3K9_q_0.05_with_ctrl.peaks_peak_14267	4	16000236	16000802	+	293	NA	exon (AT4G33180.1, exon 1 of 5)	exon (AT4G33180.1, exon 1 of 5)	413	AT4G33180.2	829455	At.31605	NM_119472		AT4G33180	AT4G33190|F4I10.110|F4I10_110	alpha/beta-Hydrolases superfamily protein	protein-coding
merged_clf_H3K9_q_0.05_with_ctrl.peaks_peak_9311	3	5234629	5236042	+	293	NA	intron (AT3G15500.1, intron 2 of 2)	intron (AT3G15500.1, intron 2 of 2)	878	AT3G15500.1	820789	At.20460	NM_112418		NAC3	ANAC055|ATNAC3|NAC domain containing protein 3|NAC domain containing protein 55|NAC-DOMAIN ENCODING GENE|NAC055	NAC domain containing protein 3	protein-coding
merged_clf_H3K9_q_0.05_with_ctrl.peaks_peak_14513	4	17032977	17033884	+	292	NA	exon (AT4G35985.1, exon 1 of 4)	exon (AT4G35985.1, exon 1 of 4)	542	AT4G35985.3	829753	At.54622	NM_119765		AT4G35985	-	Senescence/dehydration-associated protein-like protein	protein-coding
merged_clf_H3K9_q_0.05_with_ctrl.peaks_peak_1978	1	8981637	8982963	+	292	NA	exon (AT1G25560.1, exon 1 of 1)	exon (AT1G25560.1, exon 1 of 1)	1014	AT1G25560.1	839143	At.17318	NM_102367		TEM1	AtTEM1|EDF1|ETHYLENE RESPONSE DNA BINDING FACTOR 1|F2J7.3|F2J7_3|TEMPRANILLO 1	AP2/B3 transcription factor family protein	protein-coding
merged_clf_H3K9_q_0.05_with_ctrl.peaks_peak_14466	4	16852039	16852918	+	292	NA	promoter-TSS (AT4G35485.1)	promoter-TSS (AT4G35485.1)	-8	AT4G35485.1	28720207		NM_001342352		AT4G35485	-	hypothetical protein	protein-coding
merged_clf_H3K9_q_0.05_with_ctrl.peaks_peak_16648	5	8039016	8039494	+	292	NA	exon (AT5G23850.1, exon 2 of 6)	exon (AT5G23850.1, exon 2 of 6)	1457	AT5G23850.1	832450	At.30989	NM_122290		AT5G23850	MRO11.11|MRO11_11	O-glucosyltransferase rumi-like protein (DUF821)	protein-coding
merged_clf_H3K9_q_0.05_with_ctrl.peaks_peak_13696	4	13458617	13460016	+	292	NA	exon (AT4G26690.1, exon 2 of 8)	exon (AT4G26690.1, exon 2 of 8)	789	AT4G26690.1	828776	At.23755	NM_118803		SHV3	F10M23.30|F10M23_30|GDPDL3|GLYCEROPHOSPHODIESTERASE-LIKE 2|GPDL2|Glycerophosphodiester phosphodiesterase (GDPD) like 3|MRH5|MUTANT ROOT HAIR 5|SHAVEN 3	PLC-like phosphodiesterase family protein	protein-coding
merged_clf_H3K9_q_0.05_with_ctrl.peaks_peak_11657	3	22645595	22646292	+	292	NA	exon (AT3G61180.1, exon 1 of 5)	exon (AT3G61180.1, exon 1 of 5)	451	AT3G61180.1	825290	At.21194	NM_115982		AT3G61180	-	RING/U-box superfamily protein	protein-coding
merged_clf_H3K9_q_0.05_with_ctrl.peaks_peak_9598	3	6563476	6564391	+	292	NA	TTS (AT3G19030.1)	TTS (AT3G19030.1)	491	AT3G19030.1	821436	At.28720	NM_112789		AT3G19030	-	transcription initiation factor TFIID subunit 1b-like protein	protein-coding
merged_clf_H3K9_q_0.05_with_ctrl.peaks_peak_9337	3	5351115	5351709	+	292	NA	exon (AT3G15820.1, exon 1 of 3)	exon (AT3G15820.1, exon 1 of 3)	598	AT3G15820.1	820825	At.5629	NM_112452		ROD1	REDUCED OLEATE DESATURATION 1	phosphatidic acid phosphatase-related / PAP2-like protein	protein-coding
merged_clf_H3K9_q_0.05_with_ctrl.peaks_peak_11743	3	23012723	23013858	+	292	NA	TTS (AT3G62160.1)	TTS (AT3G62160.1)	619	AT3G62150.2	825388	At.34174	NM_116080		ABCB21	ATP-binding cassette B21|P-glycoprotein 21|PGP21	P-glycoprotein 21	protein-coding
merged_clf_H3K9_q_0.05_with_ctrl.peaks_peak_19261	5	26421854	26422822	+	291	NA	TTS (AT5G66060.1)	TTS (AT5G66060.1)	579	AT5G66070.5	836739	At.28882	NM_126005		AT5G66070	K2A18.15|K2A18_15	RING/U-box superfamily protein	protein-coding
merged_clf_H3K9_q_0.05_with_ctrl.peaks_peak_10261	3	10589476	10590562	+	291	NA	exon (AT3G28340.1, exon 1 of 1)	exon (AT3G28340.1, exon 1 of 1)	666	AT3G28340.1	822462	At.42818	NM_113753		GATL10	GolS8|galactinol synthase 8|galacturonosyltransferase-like 10	galacturonosyltransferase-like 10	protein-coding
merged_clf_H3K9_q_0.05_with_ctrl.peaks_peak_2039	1	9329565	9330657	+	291	NA	TTS (AT1G26921.1)	TTS (AT1G26921.1)	618	AT1G26920.1	839582	At.21273	NM_102456		AT1G26920	T2P11.11|T2P11_11	zinc finger CCHC domain protein	protein-coding
merged_clf_H3K9_q_0.05_with_ctrl.peaks_peak_7486	2	17267045	17267991	+	291	NA	exon (AT2G41420.1, exon 2 of 3)	exon (AT2G41420.1, exon 2 of 3)	682	AT2G41420.1	818740	At.43111	NM_129705		WIH2	F13H10.3|F13H10_3|WINDHOSE 2	proline-rich family protein	protein-coding
merged_clf_H3K9_q_0.05_with_ctrl.peaks_peak_14109	4	15276350	15277377	+	291	NA	intron (AT4G31510.1, intron 1 of 1)	intron (AT4G31510.1, intron 1 of 1)	642	AT4G31510.1	829278	At.54565	NM_119300		AT4G31510	F3L17.80|F3L17_80	major centromere autoantigen B-like protein	protein-coding
merged_clf_H3K9_q_0.05_with_ctrl.peaks_peak_9695	3	7085343	7086808	+	291	NA	exon (AT3G20310.1, exon 1 of 1)	exon (AT3G20310.1, exon 1 of 1)	819	AT3G20310.1	821575	At.20161	NM_112922		ERF7	ATERF-7|ATERF7|ethylene response factor 7	ethylene response factor 7	protein-coding
merged_clf_H3K9_q_0.05_with_ctrl.peaks_peak_14814	4	18215953	18217419	+	291	NA	TTS (AT4G39100.2)	TTS (AT4G39100.2)	930	AT4G39090.1	830064	At.2850	NM_120069		RD19	F19H22.190|F19H22_190|RD19A|RESPONSIVE TO DEHYDRATION 19|RESPONSIVE TO DEHYDRATION 19A	Papain family cysteine protease	protein-coding
merged_clf_H3K9_q_0.05_with_ctrl.peaks_peak_6318	2	11282893	11284015	+	290	NA	exon (AT2G26530.1, exon 1 of 1)	exon (AT2G26530.1, exon 1 of 1)	757	AT2G26530.2	817194	At.343	NM_128210		AR781	T9J22.20|T9J22_20	AR781, pheromone receptor-like protein (DUF1645)	protein-coding
merged_clf_H3K9_q_0.05_with_ctrl.peaks_peak_14898	4	18559147	18560686	+	290	NA	promoter-TSS (AT4G40040.1)	promoter-TSS (AT4G40040.1)	797	AT4G40045.1	830167	At.26468	NM_120169		AT4G40045	-	transmembrane protein	protein-coding
merged_clf_H3K9_q_0.05_with_ctrl.peaks_peak_8750	3	2754839	2756175	+	289	NA	TTS (AT3G09020.1)	TTS (AT3G09020.1)	839	AT3G09030.1	820055	At.40182	NM_111737		AT3G09030	T16O11.1	BTB/POZ domain-containing protein	protein-coding
merged_clf_H3K9_q_0.05_with_ctrl.peaks_peak_5118	1	30383712	30384248	+	289	NA	intron (AT1G80840.1, intron 1 of 3)	intron (AT1G80840.1, intron 1 of 3)	419	AT1G80840.1	844423	At.28188	NM_106732		WRKY40	ATWRKY40|F23A5.19|F23A5_19|WRKY DNA-binding protein 40	WRKY DNA-binding protein 40	protein-coding
merged_clf_H3K9_q_0.05_with_ctrl.peaks_peak_12279	4	3898890	3899753	+	289	NA	intron (AT4G06676.2, intron 2 of 9)	intron (AT4G06676.2, intron 2 of 9)	510	AT4G06676.2	826112	At.50861	NM_178994		AT4G06676	-	etoposide-induced protein	protein-coding
merged_clf_H3K9_q_0.05_with_ctrl.peaks_peak_7528	2	17471826	17472676	+	289	NA	exon (AT2G41870.1, exon 1 of 2)	exon (AT2G41870.1, exon 1 of 2)	733	AT2G41870.1	818787	At.14701	NM_129751		AT2G41870	AtREM4.2|REM4.2|remorin group 4 2	Remorin family protein	protein-coding
merged_clf_H3K9_q_0.05_with_ctrl.peaks_peak_7623	2	17909240	17909767	+	289	NA	exon (AT2G43060.1, exon 1 of 1)	exon (AT2G43060.1, exon 1 of 1)	496	AT2G43060.1	818908	At.27337	NM_129867		IBH1	AtIBH1|ILI1 binding bHLH 1|MFL8.8	ILI1 binding bHLH 1	protein-coding
merged_clf_H3K9_q_0.05_with_ctrl.peaks_peak_18737	5	24386158	24387109	+	289	NA	exon (AT5G60680.1, exon 1 of 1)	exon (AT5G60680.1, exon 1 of 1)	623	AT5G60680.1	836189	At.7237	NM_125461		AT5G60680	MUP24.10|MUP24_10	transcription initiation factor TFIID subunit (Protein of unknown function, DUF584)	protein-coding
merged_clf_H3K9_q_0.05_with_ctrl.peaks_peak_19312	5	26603133	26604351	+	289	NA	exon (AT5G66650.1, exon 1 of 2)	exon (AT5G66650.1, exon 1 of 2)	-1149	AT5G09665.1	28721119		NR_143228		AT5G09665	-	ncRNA	ncRNA
merged_clf_H3K9_q_0.05_with_ctrl.peaks_peak_15429	5	2204290	2205425	+	288	NA	TTS (AT5G07090.1)	TTS (AT5G07090.1)	609	AT5G07100.1	830601	At.5041	NM_120792		WRKY26	T28J14.40|T28J14_40|WRKY DNA-binding protein 26	WRKY DNA-binding protein 26	protein-coding
merged_clf_H3K9_q_0.05_with_ctrl.peaks_peak_2712	1	17199332	17200036	+	288	NA	intron (AT1G45976.1, intron 2 of 3)	intron (AT1G45976.1, intron 2 of 3)	370	AT1G45976.1	841106	At.16918	NM_103601		SBP1	F2G19.22|F2G19_22|S-ribonuclease binding protein 1	S-ribonuclease binding protein 1	protein-coding
merged_clf_H3K9_q_0.05_with_ctrl.peaks_peak_15264	5	1519809	1522591	+	288	NA	intron (AT5G05140.1, intron 3 of 7)	intron (AT5G05140.1, intron 3 of 7)	1495	AT5G05140.1	830396	At.21997	NM_120596		AT5G05140	MUG13.28	Transcription elongation factor (TFIIS) family protein	protein-coding
merged_clf_H3K9_q_0.05_with_ctrl.peaks_peak_1653	1	7324595	7325808	+	288	NA	exon (AT1G20980.1, exon 1 of 10)	exon (AT1G20980.1, exon 1 of 10)	730	AT1G20980.1	838692	At.21192	NM_101951		SPL14	ATSPL14|F9H16.3|F9H16_3|FBR6|SPL1R2|SQUAMOSA PROMOTER BINDING PROTEIN-LIKE 14|squamosa promoter binding protein-like 14	squamosa promoter binding protein-like 14	protein-coding
merged_clf_H3K9_q_0.05_with_ctrl.peaks_peak_9722	3	7262410	7263278	+	287	NA	intron (AT3G20770.1, intron 1 of 1)	intron (AT3G20770.1, intron 1 of 1)	540	AT3G20770.1	821625	At.24824	NM_112968		EIN3	AtEIN3|ETHYLENE-INSENSITIVE3	Ethylene insensitive 3 family protein	protein-coding
merged_clf_H3K9_q_0.05_with_ctrl.peaks_peak_10049	3	9307307	9308410	+	287	NA	TTS (AT3G25610.1)	TTS (AT3G25610.1)	1082	AT3G25600.1	822147	At.37357	NM_113458		AT3G25600	T5M7.6	Calcium-binding EF-hand family protein	protein-coding
merged_clf_H3K9_q_0.05_with_ctrl.peaks_peak_14330	4	16283121	16285047	+	287	NA	exon (AT4G33980.1, exon 2 of 5)	exon (AT4G33980.1, exon 2 of 5)	975	AT4G33980.2	829544	At.25515	NM_119559		AT4G33980	F17I5.170|F17I5_170	hypothetical protein	protein-coding
merged_clf_H3K9_q_0.05_with_ctrl.peaks_peak_14949	5	155300	157509	+	287	NA	exon (AT5G01380.1, exon 2 of 2)	exon (AT5G01380.1, exon 2 of 2)	1197	AT5G01380.1	831895	At.33561	NM_120216		AT5G01380	T10O8.90|T10O8_90	Homeodomain-like superfamily protein	protein-coding
merged_clf_H3K9_q_0.05_with_ctrl.peaks_peak_487	1	2151326	2152407	+	287	NA	promoter-TSS (AT1G07010.1)	promoter-TSS (AT1G07010.1)	675	AT1G07000.1	837210	At.43622	NM_100573		EXO70B2	ATEXO70B2|F10K1.28|F10K1_28|exocyst subunit exo70 family protein B2	exocyst subunit exo70 family protein B2	protein-coding
merged_clf_H3K9_q_0.05_with_ctrl.peaks_peak_7114	2	15515208	15516551	+	287	NA	intron (AT2G36950.1, intron 1 of 2)	intron (AT2G36950.1, intron 1 of 2)	956	AT2G36950.1	818269	At.24096	NM_129251		AT2G36950	T1J8.13|T1J8_13	Heavy metal transport/detoxification superfamily protein	protein-coding
merged_clf_H3K9_q_0.05_with_ctrl.peaks_peak_13740	4	13675780	13676838	+	287	NA	exon (AT4G27310.1, exon 1 of 2)	exon (AT4G27310.1, exon 1 of 2)	772	AT4G27310.1	828839	At.28344	NM_118865		BBX28	B-box domain protein 28|M4I22.120|M4I22_120	B-box type zinc finger family protein	protein-coding
merged_clf_H3K9_q_0.05_with_ctrl.peaks_peak_11418	3	21406140	21407042	+	287	NA	exon (AT3G57790.2, exon 1 of 3)	exon (AT3G57790.2, exon 1 of 3)	843	AT3G57790.2	824949	At.28595	NM_115640		AT3G57790	-	Pectin lyase-like superfamily protein	protein-coding
merged_clf_H3K9_q_0.05_with_ctrl.peaks_peak_14008	4	14847939	14849986	+	287	NA	exon (AT4G30350.1, exon 1 of 3)	exon (AT4G30350.1, exon 1 of 3)	1379	AT4G30350.1	829158	At.23371	NM_119181		AT4G30350	F17I23.310|F17I23_310|SMAX1-like 2|SMXL2	Double Clp-N motif-containing P-loop nucleoside triphosphate hydrolases superfamily protein	protein-coding
merged_clf_H3K9_q_0.05_with_ctrl.peaks_peak_27	1	117093	118526	+	287	NA	exon (AT1G01300.1, exon 1 of 1)	exon (AT1G01300.1, exon 1 of 1)	1025	AT1G01300.1	839375	At.22191	NM_100012		AT1G01300	F6F3.10|F6F3_10	Eukaryotic aspartyl protease family protein	protein-coding
merged_clf_H3K9_q_0.05_with_ctrl.peaks_peak_1387	1	6062276	6063439	+	286	NA	exon (AT1G17620.1, exon 1 of 1)	exon (AT1G17620.1, exon 1 of 1)	962	AT1G17620.1	838339	At.22670	NM_101625		AT1G17620	F11A6.25	Late embryogenesis abundant (LEA) hydroxyproline-rich glycoprotein family	protein-coding
merged_clf_H3K9_q_0.05_with_ctrl.peaks_peak_18660	5	23998334	23999728	+	286	NA	exon (AT5G59550.2, exon 1 of 1)	exon (AT5G59550.2, exon 1 of 1)	806	AT5G59550.1	836074	At.9728	NM_125347		RDUF2	Arabidopsis thaliana RING and Domain of Unknown Function 1117 2|AtRDUF2|F2O15.22|F2O15_22|RING and Domain of Unknown Function 1117 2	zinc finger (C3HC4-type RING finger) family protein	protein-coding
merged_clf_H3K9_q_0.05_with_ctrl.peaks_peak_8171	3	384831	386581	+	286	NA	exon (AT3G02140.1, exon 1 of 1)	exon (AT3G02140.1, exon 1 of 1)	1345	AT3G02140.1	821182	At.18540	NM_111081		TMAC2	ABI FIVE BINDING PROTEIN 4|AFP4|F1C9.7|TWO OR MORE ABRES-CONTAINING GENE 2	AFP2 (ABI five-binding protein 2) family protein	protein-coding
merged_clf_H3K9_q_0.05_with_ctrl.peaks_peak_13046	4	10071731	10073289	+	286	NA	TTS (AT4G18203.1)	TTS (AT4G18203.1)	1029	AT4G18197.1	3770303	At.63296	NM_001036586		PUP7	ARABIDOPSIS THALIANA PURINE PERMEASE 7|AT4G18200|ATPUP7|PEROXIN 17|PEX17|purine permease 7	purine permease 7	protein-coding
merged_clf_H3K9_q_0.05_with_ctrl.peaks_peak_12249	4	2593210	2594153	+	286	NA	TTS (AT4G05071.1)	TTS (AT4G05071.1)	444	AT4G05070.1	825849	At.23412	NM_116746		AT4G05070	C17L7.2	Wound-responsive family protein	protein-coding
merged_clf_H3K9_q_0.05_with_ctrl.peaks_peak_18817	5	24766223	24767424	+	285	NA	exon (AT5G61600.1, exon 1 of 1)	exon (AT5G61600.1, exon 1 of 1)	909	AT5G61600.1	836281	At.47568	NM_125553		ERF104	K11J9.13|K11J9_13|ethylene response factor 104	ethylene response factor 104	protein-coding
merged_clf_H3K9_q_0.05_with_ctrl.peaks_peak_12156	4	1493801	1495094	+	285	NA	intron (AT4G03390.1, intron 2 of 16)	intron (AT4G03390.1, intron 2 of 16)	767	AT4G03390.1	827941	At.27919	NM_116577		SRF3	F4C21.35|F4C21_35|STRUBBELIG-receptor family 3	STRUBBELIG-receptor family 3	protein-coding
merged_clf_H3K9_q_0.05_with_ctrl.peaks_peak_16549	5	7524576	7525848	+	285	NA	exon (AT5G22630.1, exon 1 of 1)	exon (AT5G22630.1, exon 1 of 1)	1126	AT5G22630.1	832326	At.20326	NM_122169		ADT5	MDJ22.5|MDJ22_5|arogenate dehydratase 5	arogenate dehydratase 5	protein-coding
merged_clf_H3K9_q_0.05_with_ctrl.peaks_peak_7007	2	15013129	15014500	+	284	NA	promoter-TSS (AT2G35710.2)	promoter-TSS (AT2G35710.2)	333	AT2G35710.3	818140	At.27134	NM_129126		PGSIP7	T20F21.27|plant glycogenin-like starch initiation protein 7	Nucleotide-diphospho-sugar transferases superfamily protein	protein-coding
merged_clf_H3K9_q_0.05_with_ctrl.peaks_peak_12551	4	7351357	7352983	+	284	NA	exon (AT4G12420.2, exon 2 of 10)	exon (AT4G12420.2, exon 2 of 10)	947	AT4G12420.1	826851	At.23464	NM_117312		SKU5	T1P17.10|T1P17_10	Cupredoxin superfamily protein	protein-coding
merged_clf_H3K9_q_0.05_with_ctrl.peaks_peak_11159	3	20296296	20297754	+	284	NA	exon (AT3G54810.1, exon 2 of 3)	exon (AT3G54810.1, exon 2 of 3)	609	AT3G54810.1	824646	At.23953	NM_115338		BME3	BLUE MICROPYLAR END 3|BLUE MICROPYLAR END 3-ZINC FINGER|BME3-ZF|GATA TRANSCRIPTION FACTOR 8|GATA8|T5N23.3	Plant-specific GATA-type zinc finger transcription factor family protein	protein-coding
merged_clf_H3K9_q_0.05_with_ctrl.peaks_peak_10847	3	18882385	18882956	+	284	NA	promoter-TSS (AT3G50790.2)	promoter-TSS (AT3G50790.2)	363	AT3G50800.1	824244	At.35454	NM_114940		AT3G50800	-	hypothetical protein	protein-coding
merged_clf_H3K9_q_0.05_with_ctrl.peaks_peak_6440	2	11962458	11963244	+	284	NA	exon (AT2G28080.1, exon 1 of 2)	exon (AT2G28080.1, exon 1 of 2)	589	AT2G28080.1	817352	At.38670	NM_128367		AT2G28080	F24D13.13|F24D13_13	UDP-Glycosyltransferase superfamily protein	protein-coding
merged_clf_H3K9_q_0.05_with_ctrl.peaks_peak_6602	2	12929106	12929708	+	284	NA	exon (AT2G30330.1, exon 2 of 3)	exon (AT2G30330.1, exon 2 of 3)	392	AT2G30330.2	817583	At.38369	NM_128586		BLOS1	BLOC subunit 1|T9D9.14|T9D9_14	GCN5L1 family protein	protein-coding
merged_clf_H3K9_q_0.05_with_ctrl.peaks_peak_6067	2	9842085	9842933	+	283	NA	promoter-TSS (AT2G23118.1)	promoter-TSS (AT2G23118.1)	-484	AT2G23118.1	6241238	At.73762	NM_001124895		AT2G23118	-	hypothetical protein	protein-coding
merged_clf_H3K9_q_0.05_with_ctrl.peaks_peak_7669	2	18072428	18073700	+	283	NA	promoter-TSS (AT2G43550.1)	promoter-TSS (AT2G43550.1)	-241	AT2G43550.1	818957	At.24392	NM_129917		AT2G43550	T1O24.29	scorpion toxin-like knottin superfamily protein	protein-coding
merged_clf_H3K9_q_0.05_with_ctrl.peaks_peak_5089	1	30303092	30304012	+	283	NA	intron (AT1G80610.1, intron 1 of 4)	intron (AT1G80610.1, intron 1 of 4)	876	AT1G80610.1	844400	At.28335	NM_106709		AT1G80610	T21F11.6|T21F11_6	hypothetical protein	protein-coding
merged_clf_H3K9_q_0.05_with_ctrl.peaks_peak_992	1	4478134	4478580	+	283	NA	promoter-TSS (AT1G13143.1)	promoter-TSS (AT1G13143.1)	-668	AT1G13143.1	28717236		NM_001332063		AT1G13143	-	hypothetical protein	protein-coding
merged_clf_H3K9_q_0.05_with_ctrl.peaks_peak_13505	4	12565174	12566305	+	283	NA	TTS (AT4G24230.1)	TTS (AT4G24230.1)	794	AT4G24220.1	828523	At.32364	NM_118555		VEP1	5-steroid-5[beta]-reductase|5[beta]-StR|AWI31|Delta4|T22A6.50|T22A6_50|VEIN PATTERNING 1	NAD(P)-binding Rossmann-fold superfamily protein	protein-coding
merged_clf_H3K9_q_0.05_with_ctrl.peaks_peak_5219	2	388039	389444	+	283	NA	promoter-TSS (AT2G04125.1)	promoter-TSS (AT2G04125.1)	-428	AT2G04125.1	28717547		NR_139987		AT2G04125	-	ncRNA	ncRNA
merged_clf_H3K9_q_0.05_with_ctrl.peaks_peak_7678	2	18115055	18115327	+	283	NA	promoter-TSS (AT2G43700.4)	promoter-TSS (AT2G43700.4)	99	AT2G43700.1	818972	At.37031	NM_129932		AT2G43700	F18O19.19|L-type lectin receptor kinase V.4|LecRK-V.4	Concanavalin A-like lectin protein kinase family protein	protein-coding
merged_clf_H3K9_q_0.05_with_ctrl.peaks_peak_8017	2	19469800	19471459	+	283	NA	exon (AT2G47440.2, exon 2 of 2)	exon (AT2G47440.2, exon 2 of 2)	1017	AT2G47440.1	819357	At.26830	NM_130312		AT2G47440	T30B22.26	Tetratricopeptide repeat (TPR)-like superfamily protein	protein-coding
merged_clf_H3K9_q_0.05_with_ctrl.peaks_peak_12319	4	5461448	5462012	+	283	NA	exon (AT4G08580.2, exon 1 of 2)	exon (AT4G08580.2, exon 1 of 2)	296	AT4G08580.2	826419	At.31498	NM_116927		AT4G08580	T3F12.11	microfibrillar-associated protein-like protein	protein-coding
merged_clf_H3K9_q_0.05_with_ctrl.peaks_peak_12522	4	7214719	7215663	+	283	NA	exon (AT4G12040.2, exon 1 of 1)	exon (AT4G12040.2, exon 1 of 1)	481	AT4G12040.2	826812	At.19630	NM_117274		SAP7	AtSAP7|F16J13.110|F16J13_110|stress-associated protein 7	A20/AN1-like zinc finger family protein	protein-coding
merged_clf_H3K9_q_0.05_with_ctrl.peaks_peak_7063	2	15229101	15230390	+	282	NA	exon (AT2G36320.1, exon 2 of 2)	exon (AT2G36320.1, exon 2 of 2)	1031	AT2G36320.1	818205	At.14117	NM_129189		AT2G36320	F2H17.7|F2H17_7	A20/AN1-like zinc finger family protein	protein-coding
merged_clf_H3K9_q_0.05_with_ctrl.peaks_peak_6177	2	10453511	10454514	+	282	NA	exon (AT2G24600.4, exon 1 of 3)	exon (AT2G24600.4, exon 1 of 3)	579	AT2G24600.2	816996	At.26359	NM_128021		AT2G24600	F25P17.10|F25P17_10	Ankyrin repeat family protein	protein-coding
merged_clf_H3K9_q_0.05_with_ctrl.peaks_peak_8434	3	1488595	1490394	+	282	NA	exon (AT3G05220.2, exon 1 of 1)	exon (AT3G05220.2, exon 1 of 1)	493	AT3G05220.2	819686	At.40712	NM_111395		AT3G05220	T12H1.19|T12H1_19	Heavy metal transport/detoxification superfamily protein	protein-coding
merged_clf_H3K9_q_0.05_with_ctrl.peaks_peak_12610	4	7773004	7773691	+	282	NA	exon (AT4G13350.2, exon 2 of 13)	exon (AT4G13350.2, exon 2 of 13)	319	AT4G13350.1	826966	At.23435	NM_117409		NIG	NSP (nuclear shuttle protein)-interacting GTPase|T9E8.90|T9E8_90	NSP (nuclear shuttle protein)-interacting GTPase	protein-coding
merged_clf_H3K9_q_0.05_with_ctrl.peaks_peak_14626	4	17504591	17506137	+	282	NA	exon (AT4G37180.1, exon 3 of 5)	exon (AT4G37180.1, exon 3 of 5)	800	AT4G37180.2	829872	At.4657	NM_119881		AT4G37180	-	Homeodomain-like superfamily protein	protein-coding
merged_clf_H3K9_q_0.05_with_ctrl.peaks_peak_14843	4	18324692	18327611	+	282	NA	exon (AT4G39400.1, exon 1 of 1)	exon (AT4G39400.1, exon 1 of 1)	1694	AT4G39400.1	830095	At.27898	NM_120100		BRI1	ATBRI1|BIN1|BR INSENSITIVE 1|BRASSINOSTEROID INSENSITIVE 1|CABBAGE 2|CBB2|DWARF 2|DWF2|F23K16.30|F23K16_30	Leucine-rich receptor-like protein kinase family protein	protein-coding
merged_clf_H3K9_q_0.05_with_ctrl.peaks_peak_14613	4	17440349	17441545	+	282	NA	intron (AT4G36990.1, intron 1 of 1)	intron (AT4G36990.1, intron 1 of 1)	770	AT4G36990.1	829853	At.5365	NM_119862		HSF4	AP22.9|AP22_9|ARABIDOPSIS THALIANA CLASS B HEAT SHOCK FACTOR B1|ARABIDOPSIS THALIANA HEAT SHOCK FACTOR 4|AT-HSFB1|ATHSF4|CLASS B HEAT SHOCK FACTOR B1|HSFB1|TBF1|TL1-binding transcription factor 1|heat shock factor 4	heat shock factor 4	protein-coding
merged_clf_H3K9_q_0.05_with_ctrl.peaks_peak_14803	4	18152001	18152494	+	282	NA	promoter-TSS (AT4G38940.1)	promoter-TSS (AT4G38940.1)	350	AT4G38932.1	10723029		NR_142410		AT4G38932	-	ncRNA	ncRNA
merged_clf_H3K9_q_0.05_with_ctrl.peaks_peak_2073	1	9481580	9482765	+	281	NA	promoter-TSS (AT1G27300.1)	promoter-TSS (AT1G27300.1)	640	AT1G27290.2	839618	At.20786	NM_102491		AT1G27290	F17L21.8|F17L21_8	transmembrane protein	protein-coding
merged_clf_H3K9_q_0.05_with_ctrl.peaks_peak_7982	2	19333816	19334952	+	281	NA	exon (AT2G47060.4, exon 3 of 7)	exon (AT2G47060.4, exon 3 of 7)	519	AT2G47060.2	819320	At.21876	NM_130274		PTI1-4	F14M4.11|Pto-interacting 1-4	Protein kinase superfamily protein	protein-coding
merged_clf_H3K9_q_0.05_with_ctrl.peaks_peak_12282	4	4073843	4074576	+	281	NA	exon (AT4G06746.1, exon 1 of 1)	exon (AT4G06746.1, exon 1 of 1)	526	AT4G06746.1	826148	At.47204	NM_179009		RAP2.9	DEAR5|DREB AND EAR MOTIF PROTEIN 5|related to AP2 9	related to AP2 9	protein-coding
merged_clf_H3K9_q_0.05_with_ctrl.peaks_peak_1976	1	8976501	8978187	+	281	NA	exon (AT1G25550.2, exon 2 of 3)	exon (AT1G25550.2, exon 2 of 3)	1018	AT1G25550.2	839142	At.25159	NM_102366		AT1G25550	-	myb-like transcription factor family protein	protein-coding
merged_clf_H3K9_q_0.05_with_ctrl.peaks_peak_8461	3	1591283	1592204	+	281	NA	exon (AT3G05490.1, exon 1 of 1)	exon (AT3G05490.1, exon 1 of 1)	628	AT3G05490.1	28718845	At.43157	NM_001337587		RALFL22	F22F7.6|F22F7_6|ralf-like 22	ralf-like 22	protein-coding
merged_clf_H3K9_q_0.05_with_ctrl.peaks_peak_2454	1	11799137	11800932	+	280	NA	exon (AT1G32640.1, exon 1 of 1)	exon (AT1G32640.1, exon 1 of 1)	1373	AT1G32640.1	840158	At.22648	NM_102998		MYC2	ATMYC2|F6N18.4|F6N18_4|JAI1|JASMONATE INSENSITIVE 1|JIN1|RD22BP1|ZBF1	Basic helix-loop-helix (bHLH) DNA-binding family protein	protein-coding
merged_clf_H3K9_q_0.05_with_ctrl.peaks_peak_12232	4	2506173	2506747	+	280	NA	TTS (AT4G04920.3)	TTS (AT4G04920.3)	481	AT4G04925.1	2745645	At.48001	NM_202783		AT4G04925	-	transmembrane protein	protein-coding
merged_clf_H3K9_q_0.05_with_ctrl.peaks_peak_2591	1	13145613	13146787	+	280	NA	Intergenic	Intergenic	-1212	AT1G35610.1	840457		NM_103258		AT1G35610	F15O4.27	Cysteine/Histidine-rich C1 domain family protein	protein-coding
merged_clf_H3K9_q_0.05_with_ctrl.peaks_peak_11041	3	19744655	19745989	+	280	NA	exon (AT3G53260.1, exon 2 of 2)	exon (AT3G53260.1, exon 2 of 2)	1792	AT3G53260.1	824493	At.21614	NM_115186		PAL2	ATPAL2|phenylalanine ammonia-lyase 2	phenylalanine ammonia-lyase 2	protein-coding
merged_clf_H3K9_q_0.05_with_ctrl.peaks_peak_15092	5	711452	712772	+	279	NA	exon (AT5G03040.2, exon 3 of 6)	exon (AT5G03040.2, exon 3 of 6)	679	AT5G03040.2	831696	At.25015	NM_120382		iqd2	F15A17.70|F15A17_70|IQ-domain 2	IQ-domain 2	protein-coding
merged_clf_H3K9_q_0.05_with_ctrl.peaks_peak_12070	4	1042364	1043450	+	279	NA	exon (AT4G02370.1, exon 1 of 1)	exon (AT4G02370.1, exon 1 of 1)	672	AT4G02370.1	828057	At.22062	NM_116470		AT4G02370	T14P8.18|T14P8_18	pectinesterase (Protein of unknown function, DUF538)	protein-coding
merged_clf_H3K9_q_0.05_with_ctrl.peaks_peak_6573	2	12814355	12815657	+	279	NA	intron (AT2G30020.1, intron 1 of 1)	intron (AT2G30020.1, intron 1 of 1)	735	AT2G30020.1	817553	At.19796	NM_128557		AT2G30020	AP2C1|F23F1.6|F23F1_6	Protein phosphatase 2C family protein	protein-coding
merged_clf_H3K9_q_0.05_with_ctrl.peaks_peak_10809	3	18665639	18666599	+	279	NA	exon (AT3G50340.1, exon 1 of 1)	exon (AT3G50340.1, exon 1 of 1)	572	AT3G50340.1	824196	At.1431	NM_114894		AT3G50340	-	hypothetical protein	protein-coding
merged_clf_H3K9_q_0.05_with_ctrl.peaks_peak_10538	3	17181024	17182470	+	279	NA	intron (AT3G46630.1, intron 1 of 2)	intron (AT3G46630.1, intron 1 of 2)	813	AT3G46630.1	823816	At.35903	NM_114530		AT3G46630	-	DCL protein (DUF3223)	protein-coding
merged_clf_H3K9_q_0.05_with_ctrl.peaks_peak_18754	5	24480517	24482067	+	279	NA	TTS (AT5G08975.1)	TTS (AT5G08975.1)	1001	AT5G60850.1	836206	At.20219	NM_125478		OBP4	MAE1.2|MAE1_2|OBF binding protein 4|ZINC FINGER PROTEIN OBP4	OBF binding protein 4	protein-coding
merged_clf_H3K9_q_0.05_with_ctrl.peaks_peak_2166	1	9963627	9964537	+	278	NA	exon (AT1G28380.1, exon 2 of 7)	exon (AT1G28380.1, exon 2 of 7)	634	AT1G28380.1	839735	At.22050	NM_102605		NSL1	F3M18.18|F3M18_18|necrotic spotted lesions 1	MAC/Perforin domain-containing protein	protein-coding
merged_clf_H3K9_q_0.05_with_ctrl.peaks_peak_14918	5	36949	37887	+	278	NA	exon (AT5G01100.1, exon 1 of 8)	exon (AT5G01100.1, exon 1 of 8)	581	AT5G01100.1	831831	At.33964	NM_120188		FRB1	F7J8.80|F7J8_80|FRIABLE 1	O-fucosyltransferase family protein	protein-coding
merged_clf_H3K9_q_0.05_with_ctrl.peaks_peak_11269	3	20799969	20800855	+	278	NA	intron (AT3G56050.2, intron 3 of 6)	intron (AT3G56050.2, intron 3 of 6)	676	AT3G56050.1	824771	At.20885	NM_115463		AT3G56050	-	Protein kinase family protein	protein-coding
merged_clf_H3K9_q_0.05_with_ctrl.peaks_peak_15098	5	730276	731203	+	278	NA	exon (AT5G03110.1, exon 1 of 1)	exon (AT5G03110.1, exon 1 of 1)	612	AT5G03110.1	831797	At.43848	NM_120389		AT5G03110	F15A17.140|F15A17_140	protamine P1 family protein	protein-coding
merged_clf_H3K9_q_0.05_with_ctrl.peaks_peak_14375	4	16441213	16442298	+	278	NA	exon (AT4G34390.1, exon 1 of 8)	exon (AT4G34390.1, exon 1 of 8)	646	AT4G34390.2	829589	At.27827	NM_119604		XLG2	F10M10.160|F10M10_160|extra-large GTP-binding protein 2	extra-large GTP-binding protein 2	protein-coding
merged_clf_H3K9_q_0.05_with_ctrl.peaks_peak_14870	4	18458059	18459179	+	278	NA	exon (AT4G39780.1, exon 1 of 1)	exon (AT4G39780.1, exon 1 of 1)	638	AT4G39780.1	830136	At.2297	NM_120141		AT4G39780	T19P19.170|T19P19_170	Integrase-type DNA-binding superfamily protein	protein-coding
merged_clf_H3K9_q_0.05_with_ctrl.peaks_peak_10537	3	17178809	17180020	+	278	NA	TTS (ENSRNA049757954-T1)	TTS (ENSRNA049757954-T1)	967	at3g07515
merged_clf_H3K9_q_0.05_with_ctrl.peaks_peak_12097	4	1139326	1140460	+	278	NA	intron (AT4G02590.3, intron 2 of 6)	intron (AT4G02590.3, intron 2 of 6)	598	AT4G02590.2	828126	At.20028	NM_116493		UNE12	T10P11.13|T10P11_13|unfertilized embryo sac 12	basic helix-loop-helix (bHLH) DNA-binding superfamily protein	protein-coding
merged_clf_H3K9_q_0.05_with_ctrl.peaks_peak_7928	2	19079384	19079976	+	278	NA	TTS (AT2G46493.1)	TTS (AT2G46493.1)	375	AT2G46490.1	819258	At.25021	NM_130213		AT2G46490	F11C10.31	hypothetical protein	protein-coding
merged_clf_H3K9_q_0.05_with_ctrl.peaks_peak_2852	1	18321317	18322292	+	278	NA	exon (AT1G49500.2, exon 1 of 1)	exon (AT1G49500.2, exon 1 of 1)	480	AT1G49500.1	841374	At.23092	NM_103838		AT1G49500	F13F21.6|F13F21_6	transcription initiation factor TFIID subunit 1b-like protein	protein-coding
merged_clf_H3K9_q_0.05_with_ctrl.peaks_peak_16249	5	6061752	6062523	+	278	NA	exon (AT5G18310.3, exon 1 of 3)	exon (AT5G18310.3, exon 1 of 3)	505	AT5G18310.4	831949	At.31446	NM_121836		AT5G18310	F20L16.30|F20L16_30	ubiquitin hydrolase	protein-coding
merged_clf_H3K9_q_0.05_with_ctrl.peaks_peak_13200	4	10940717	10943241	+	278	NA	intron (AT4G20260.1, intron 2 of 4)	intron (AT4G20260.1, intron 2 of 4)	1233	AT4G20260.3	827773	At.21638	NM_118145		PCAP1	ARABIDOPSIS THALIANA PLASMA-MEMBRANE ASSOCIATED CATION-BINDING PROTEIN 1|ATPCAP1|F1C12.180|F1C12_180|MDP25|microtubule-destabilizing protein 25|plasma-membrane associated cation-binding protein 1	plasma-membrane associated cation-binding protein 1	protein-coding
merged_clf_H3K9_q_0.05_with_ctrl.peaks_peak_9105	3	4310439	4311375	+	277	NA	TTS (AT3G13300.1)	TTS (AT3G13300.1)	722	AT3G13310.1	820531	At.23684	NM_112176		AT3G13310	DJC66|DNA J protein C66	Chaperone DnaJ-domain superfamily protein	protein-coding
merged_clf_H3K9_q_0.05_with_ctrl.peaks_peak_4652	1	28430534	28431047	+	277	NA	exon (AT1G75710.1, exon 3 of 3)	exon (AT1G75710.1, exon 3 of 3)	2119	AT1G75710.1	843905	At.47595	NM_106222		AT1G75710	F10A5.10|F10A5_10	C2H2-like zinc finger protein	protein-coding
merged_clf_H3K9_q_0.05_with_ctrl.peaks_peak_14016	4	14881992	14883379	+	277	NA	exon (AT4G30440.1, exon 1 of 1)	exon (AT4G30440.1, exon 1 of 1)	898	AT4G30440.1	829167	At.20969	NM_119190		GAE1	F17I23.220|F17I23_220|UDP-D-glucuronate 4-epimerase 1	UDP-D-glucuronate 4-epimerase 1	protein-coding
merged_clf_H3K9_q_0.05_with_ctrl.peaks_peak_4876	1	29434304	29436481	+	277	NA	exon (AT1G78240.1, exon 2 of 9)	exon (AT1G78240.1, exon 2 of 9)	1267	AT1G78240.2	844160	At.20566	NM_106474		TSD2	F3F9.21|F3F9_21|OSU1|QUA2|QUASIMODO2|TUMOROUS SHOOT DEVELOPMENT 2	S-adenosyl-L-methionine-dependent methyltransferases superfamily protein	protein-coding
merged_clf_H3K9_q_0.05_with_ctrl.peaks_peak_18680	5	24103004	24103778	+	277	NA	exon (AT5G59820.1, exon 1 of 1)	exon (AT5G59820.1, exon 1 of 1)	577	AT5G59820.1	836103	At.24260	NM_125374		RHL41	AtZAT12|MMN10.11|MMN10_11|RESPONSIVE TO HIGH LIGHT 41|ZAT12	C2H2-type zinc finger family protein	protein-coding
merged_clf_H3K9_q_0.05_with_ctrl.peaks_peak_18503	5	23355549	23357340	+	277	NA	exon (AT5G57660.1, exon 2 of 2)	exon (AT5G57660.1, exon 2 of 2)	1107	AT5G57660.1	835872	At.20797	NM_125149		COL5	ATCOL5|B-box domain protein 6|BBX6|CONSTANS-like 5|MRI1.1|MRI1_1	CONSTANS-like 5	protein-coding
merged_clf_H3K9_q_0.05_with_ctrl.peaks_peak_16234	5	5999712	6000433	+	277	NA	exon (AT5G18140.1, exon 3 of 3)	exon (AT5G18140.1, exon 3 of 3)	482	AT5G18150.1	831933	At.43144	NM_121820		AT5G18150	MRG7.11|MRG7_11	Methyltransferase-related protein	protein-coding
merged_clf_H3K9_q_0.05_with_ctrl.peaks_peak_13951	4	14579771	14581617	+	277	NA	exon (AT4G29780.1, exon 1 of 1)	exon (AT4G29780.1, exon 1 of 1)	1131	AT4G29780.1	829100	At.3318	NM_119124		AT4G29780	F27B13.20|F27B13_20	nuclease	protein-coding
merged_clf_H3K9_q_0.05_with_ctrl.peaks_peak_9567	3	6429729	6430491	+	277	NA	promoter-TSS (AT3G03745.1)	promoter-TSS (AT3G03745.1)	26	AT3G03745.1	28718689		NR_141032		AT3G03745	-	ncRNA	ncRNA
merged_clf_H3K9_q_0.05_with_ctrl.peaks_peak_5565	2	6797649	6798224	+	277	NA	intron (AT2G15580.1, intron 1 of 2)	intron (AT2G15580.1, intron 1 of 2)	601	AT2G15580.2	816051	At.43738	NM_127119		AT2G15580	-	RING/U-box superfamily protein	protein-coding
merged_clf_H3K9_q_0.05_with_ctrl.peaks_peak_9056	3	4078726	4079595	+	277	NA	exon (AT3G12830.1, exon 1 of 1)	exon (AT3G12830.1, exon 1 of 1)	467	AT3G12830.1	820465	At.5682	NM_112119		AT3G12830	SAUR72|SMALL AUXIN UPREGULATED 72	SAUR-like auxin-responsive protein family	protein-coding
merged_clf_H3K9_q_0.05_with_ctrl.peaks_peak_18232	5	22078605	22080191	+	277	NA	exon (AT5G54380.1, exon 1 of 1)	exon (AT5G54380.1, exon 1 of 1)	943	AT5G54380.1	835526	At.28202	NM_124818		THE1	GA469.3|GA469_3|THESEUS1	protein kinase family protein	protein-coding
merged_clf_H3K9_q_0.05_with_ctrl.peaks_peak_8514	3	1836705	1837861	+	277	NA	promoter-TSS (AT3G06085.1)	promoter-TSS (AT3G06085.1)	-340	AT3G06085.1	28718889		NM_001337631		AT3G06085	-	hypothetical protein	protein-coding
merged_clf_H3K9_q_0.05_with_ctrl.peaks_peak_14672	4	17670582	17672320	+	277	NA	TTS (AT4G37608.1)	TTS (AT4G37608.1)	902	AT4G37610.1	829915	At.28153	NM_119924		BT5	BTB and TAZ domain protein 5|F19F18.100|F19F18_100	BTB and TAZ domain protein 5	protein-coding
merged_clf_H3K9_q_0.05_with_ctrl.peaks_peak_17758	5	19312967	19313723	+	277	NA	promoter-TSS (AT5G47650.1)	promoter-TSS (AT5G47650.1)	598	AT5G47660.1	834817	At.29884	NM_124140		AT5G47660	MNJ7.25|MNJ7_25	Homeodomain-like superfamily protein	protein-coding
merged_clf_H3K9_q_0.05_with_ctrl.peaks_peak_5423	2	2215261	2216994	+	276	NA	promoter-TSS (AT2G05812.3)	promoter-TSS (AT2G05812.3)	-947	AT2G05812.3	28717675		NR_140103		AT2G05812	-	ncRNA	ncRNA
merged_clf_H3K9_q_0.05_with_ctrl.peaks_peak_13551	4	12785338	12786147	+	276	NA	TTS (AT4G24810.5)	TTS (AT4G24810.5)	491	AT4G07285.1	28719908		NR_142128		AT4G07285	-	ncRNA	ncRNA
merged_clf_H3K9_q_0.05_with_ctrl.peaks_peak_2442	1	11738204	11739174	+	276	NA	TTS (AT1G32470.1)	TTS (AT1G32470.1)	571	AT1G32460.1	840140	At.15531	NM_102981		AT1G32460	F5D14.24|F5D14_24	hypothetical protein	protein-coding
merged_clf_H3K9_q_0.05_with_ctrl.peaks_peak_7750	2	18374328	18376434	+	276	NA	exon (AT2G44500.1, exon 2 of 4)	exon (AT2G44500.1, exon 2 of 4)	1089	AT2G44500.2	819057	At.21825	NM_130013		AT2G44500	F4I1.31	O-fucosyltransferase family protein	protein-coding
merged_clf_H3K9_q_0.05_with_ctrl.peaks_peak_5713	2	7864326	7865373	+	276	NA	intron (AT2G18090.1, intron 1 of 3)	intron (AT2G18090.1, intron 1 of 3)	655	AT2G18090.1	816321	At.13556	NM_179640		AT2G18090	T27K22.4|T27K22_4	PHD finger family protein / SWIB complex BAF60b domain-containing protein / GYF domain-containing protein	protein-coding
merged_clf_H3K9_q_0.05_with_ctrl.peaks_peak_1770	1	7874020	7875281	+	276	NA	exon (AT1G22280.3, exon 3 of 6)	exon (AT1G22280.3, exon 3 of 6)	717	AT1G22280.1	838835	At.41611	NM_102079		PAPP2C	T16E15.10|T16E15_10|phytochrome-associated protein phosphatase type 2C	phytochrome-associated protein phosphatase type 2C	protein-coding
merged_clf_H3K9_q_0.05_with_ctrl.peaks_peak_2057	1	9409946	9411157	+	275	NA	exon (AT1G27100.1, exon 1 of 3)	exon (AT1G27100.1, exon 1 of 3)	817	AT1G27100.1	839599	At.16281	NM_102472		AT1G27100	T7N9.16|T7N9_16	Actin cross-linking protein	protein-coding
merged_clf_H3K9_q_0.05_with_ctrl.peaks_peak_7955	2	19175966	19177081	+	275	NA	TTS (at2g46685)	TTS (at2g46685)	415	at2g46685
merged_clf_H3K9_q_0.05_with_ctrl.peaks_peak_5648	2	7516503	7517507	+	275	NA	exon (AT2G17290.2, exon 2 of 8)	exon (AT2G17290.2, exon 2 of 8)	675	AT2G17290.1	816235	At.9828	NM_127284		CPK6	ARABIDOPSIS THALIANA CALCIUM-DEPENDENT PROTEIN KINASE 6|ARABIDOPSIS THALIANA CALMODULIN-DOMAIN PROTEIN KINASE 3|ATCDPK3|ATCPK6|CALCIUM-DEPENDENT PROTEIN KINASE 6|CALMODULIN-DOMAIN PROTEIN KINASE 3|F5J6.13|F5J6_13|calcium dependent protein kinase 6	Calcium-dependent protein kinase family protein	protein-coding
merged_clf_H3K9_q_0.05_with_ctrl.peaks_peak_12241	4	2567337	2568204	+	275	NA	intron (AT4G05010.1, intron 1 of 2)	intron (AT4G05010.1, intron 1 of 2)	587	AT4G05010.1	825843	At.54152	NM_116740		FBS3	AtFBS3|C17L7.7|F-box stress induced 3	F-box family protein	protein-coding
merged_clf_H3K9_q_0.05_with_ctrl.peaks_peak_10227	3	10318539	10318920	+	275	NA	TTS (AT3G27825.1)	TTS (AT3G27825.1)	224	AT3G27830.2	822403	At.251	NM_113699		RPL12-A	RIBOSOMAL PROTEIN L12|RPL12|ribosomal protein L12-A	ribosomal protein L12-A	protein-coding
merged_clf_H3K9_q_0.05_with_ctrl.peaks_peak_13010	4	9928707	9930061	+	274	NA	exon (AT4G17870.1, exon 1 of 1)	exon (AT4G17870.1, exon 1 of 1)	797	AT4G17870.1	827510	At.2045	NM_117896		PYR1	PYRABACTIN RESISTANCE 1|RCAR11|T6K21.50|T6K21_50|regulatory component of ABA receptor 11	Polyketide cyclase/dehydrase and lipid transport superfamily protein	protein-coding
merged_clf_H3K9_q_0.05_with_ctrl.peaks_peak_497	1	2187468	2188403	+	274	NA	TTS (AT1G07119.4)	TTS (AT1G07119.4)	159	AT1G07130.1	837223	At.27320	NM_100586		STN1	ATSTN1|F10K1.17|F10K1_17	Nucleic acid-binding, OB-fold-like protein	protein-coding
merged_clf_H3K9_q_0.05_with_ctrl.peaks_peak_10114	3	9665550	9666152	+	274	NA	promoter-TSS (AT3G26400.1)	promoter-TSS (AT3G26400.1)	303	AT3G26395.1	28719322		NM_001338801		AT3G26395	-	hypothetical protein	protein-coding
merged_clf_H3K9_q_0.05_with_ctrl.peaks_peak_10071	3	9463610	9464180	+	274	NA	TTS (AT3G25860.1)	TTS (AT3G25860.1)	781	AT3G25870.1	822182	At.43505	NM_113490		AT3G25870	-	hypothetical protein	protein-coding
merged_clf_H3K9_q_0.05_with_ctrl.peaks_peak_14904	4	18579318	18580327	+	274	NA	exon (AT4G40085.1, exon 1 of 1)	exon (AT4G40085.1, exon 1 of 1)	508	AT4G40080.1	830171	At.27784	NM_120173		AT4G40080	T5J17.250|T5J17_250	ENTH/ANTH/VHS superfamily protein	protein-coding
merged_clf_H3K9_q_0.05_with_ctrl.peaks_peak_1657	1	7346210	7346921	+	274	NA	exon (AT1G21010.1, exon 1 of 1)	exon (AT1G21010.1, exon 1 of 1)	409	AT1G21010.1	838695	At.41675	NM_101954		AT1G21010	F9H16.19|F9H16_19	poly polymerase	protein-coding
merged_clf_H3K9_q_0.05_with_ctrl.peaks_peak_7237	2	16108413	16109793	+	274	NA	promoter-TSS (AT2G08965.1)	promoter-TSS (AT2G08965.1)	-134	AT2G08965.1	28718058		NR_140443		AT2G08965	-	ncRNA	ncRNA
merged_clf_H3K9_q_0.05_with_ctrl.peaks_peak_4170	1	26400726	26402466	+	274	NA	exon (AT1G70090.2, exon 1 of 2)	exon (AT1G70090.2, exon 1 of 2)	806	AT1G70090.2	843345	At.20996	NM_105677		LGT8	F20P5.18|F20P5_18|GALACTURONOSYLTRANSFERASE-LIKE 9|GATL9|glucosyl transferase family 8	glucosyl transferase family 8	protein-coding
merged_clf_H3K9_q_0.05_with_ctrl.peaks_peak_11332	3	21059997	21061066	+	273	NA	exon (AT3G56880.1, exon 1 of 1)	exon (AT3G56880.1, exon 1 of 1)	746	AT3G56880.1	824855	At.23094	NM_115547		AT3G56880	-	VQ motif-containing protein	protein-coding
merged_clf_H3K9_q_0.05_with_ctrl.peaks_peak_15799	5	3931645	3932312	+	273	NA	exon (AT5G12170.3, exon 1 of 7)	exon (AT5G12170.3, exon 1 of 7)	494	AT5G12170.3	831090	At.51404	NM_001085106		CLT3	CRT (chloroquine-resistance transporter)-like transporter 3	CRT (chloroquine-resistance transporter)-like transporter 3	protein-coding
merged_clf_H3K9_q_0.05_with_ctrl.peaks_peak_6647	2	13162389	13163373	+	273	NA	TTS (AT2G30925.1)	TTS (AT2G30925.1)	807	AT2G30930.1	817644	At.24806	NM_128646		AT2G30930	F7F1.14|F7F1_14	hypothetical protein	protein-coding
merged_clf_H3K9_q_0.05_with_ctrl.peaks_peak_9200	3	4707671	4708840	+	273	NA	exon (AT3G14180.1, exon 1 of 1)	exon (AT3G14180.1, exon 1 of 1)	921	AT3G14180.1	820635	At.39278	NM_112274		ASIL2	Arabidopsis 6B-interacting protein 1-like 2	sequence-specific DNA binding transcription factor	protein-coding
merged_clf_H3K9_q_0.05_with_ctrl.peaks_peak_3359	1	21441653	21442921	+	273	NA	exon (AT1G57990.1, exon 1 of 1)	exon (AT1G57990.1, exon 1 of 1)	749	AT1G57990.1	842166	At.20872	NM_104584		PUP18	ATPUP18|F13D13.3|purine permease 18	purine permease 18	protein-coding
merged_clf_H3K9_q_0.05_with_ctrl.peaks_peak_2281	1	10689061	10690818	+	273	NA	intron (AT1G30330.3, intron 1 of 13)	intron (AT1G30330.3, intron 1 of 13)	899	AT1G30330.2	839913	At.21939	NM_102771		ARF6	T4K22.6|T4K22_6|auxin response factor 6	auxin response factor 6	protein-coding
merged_clf_H3K9_q_0.05_with_ctrl.peaks_peak_5555	2	6666628	6667641	+	273	NA	exon (AT2G15320.1, exon 1 of 1)	exon (AT2G15320.1, exon 1 of 1)	912	AT2G15320.1	816021	At.14560	NM_127092		AT2G15320	F27O10.3|F27O10_3	Leucine-rich repeat (LRR) family protein	protein-coding
merged_clf_H3K9_q_0.05_with_ctrl.peaks_peak_5442	2	2589143	2590402	+	273	NA	exon (AT2G06530.2, exon 2 of 5)	exon (AT2G06530.2, exon 2 of 5)	681	AT2G06530.2	815211	At.20774	NM_126650		VPS2.1	T12H3.8|T12H3_8|VPS2	SNF7 family protein	protein-coding
merged_clf_H3K9_q_0.05_with_ctrl.peaks_peak_14459	4	16814043	16814665	+	273	NA	promoter-TSS (AT4G35370.1)	promoter-TSS (AT4G35370.1)	391	AT4G35360.3	829689	At.27351	NM_119702		AT4G35360	F23E12.80|F23E12_80	pantothenate kinase	protein-coding
merged_clf_H3K9_q_0.05_with_ctrl.peaks_peak_18847	5	24910421	24912165	+	272	NA	intron (AT5G62000.2, intron 3 of 15)	intron (AT5G62000.2, intron 3 of 15)	935	AT5G62000.4	836321	At.21704	NM_125593		ARF2	ARF1-BINDING PROTEIN|ARF1-BP|AT5G62010|AtARF2|HLS1 SUPPRESSOR|HSS|MTG10.1|MTG10_1|ORE14|ORESARA 14|auxin response factor 2	auxin response factor 2	protein-coding
merged_clf_H3K9_q_0.05_with_ctrl.peaks_peak_5179	2	216790	217584	+	272	NA	exon (AT2G01480.1, exon 1 of 10)	exon (AT2G01480.1, exon 1 of 10)	492	AT2G01480.2	814676	At.42486	NM_126209		AT2G01480	F2I9.10|F2I9_10	O-fucosyltransferase family protein	protein-coding
merged_clf_H3K9_q_0.05_with_ctrl.peaks_peak_11784	3	23201186	23202590	+	272	NA	exon (AT3G62720.2, exon 2 of 2)	exon (AT3G62720.2, exon 2 of 2)	855	AT3G62720.1	825446	At.4829	NM_116137		XT1	ATXT1|AtXXT1|XXT1|XYG XYLOSYLTRANSFERASE 1|xylosyltransferase 1	xylosyltransferase 1	protein-coding
merged_clf_H3K9_q_0.05_with_ctrl.peaks_peak_11667	3	22675563	22676768	+	272	NA	intron (AT3G61260.1, intron 1 of 4)	intron (AT3G61260.1, intron 1 of 4)	686	AT3G61260.1	825298	At.21524	NM_115990		AT3G61260	-	Remorin family protein	protein-coding
merged_clf_H3K9_q_0.05_with_ctrl.peaks_peak_5808	2	8470624	8471508	+	272	NA	exon (AT2G19570.1, exon 1 of 1)	exon (AT2G19570.1, exon 1 of 1)	578	AT2G19570.1	816476	At.25410	NM_127515		CDA1	AT-CDA1|CYTIDINE DEAMINASE 1|DESZ|F3P11.17|F3P11_17|cytidine deaminase 1	cytidine deaminase 1	protein-coding
merged_clf_H3K9_q_0.05_with_ctrl.peaks_peak_8243	3	649862	650582	+	272	NA	exon (AT3G02910.1, exon 1 of 1)	exon (AT3G02910.1, exon 1 of 1)	408	AT3G02910.1	821189	At.18767	NM_111161		AT3G02910	F13E7.14|F13E7_14	AIG2-like (avirulence induced gene) family protein	protein-coding
merged_clf_H3K9_q_0.05_with_ctrl.peaks_peak_13038	4	10030698	10032293	+	272	NA	intron (AT4G18070.7, intron 1 of 3)	intron (AT4G18070.7, intron 1 of 3)	573	AT4G18070.7	827532	At.27158	NM_117917		AT4G18070	F15J5.40|F15J5_40	suppressor	protein-coding
merged_clf_H3K9_q_0.05_with_ctrl.peaks_peak_12608	4	7758472	7759914	+	272	NA	exon (AT4G13340.1, exon 1 of 1)	exon (AT4G13340.1, exon 1 of 1)	918	AT4G13340.1	826964	At.48854	NM_117407		LRX3	T9E8.80|T9E8_80|leucine-rich repeat/extensin 3	Leucine-rich repeat (LRR) family protein	protein-coding
merged_clf_H3K9_q_0.05_with_ctrl.peaks_peak_8374	3	1260823	1261573	+	272	NA	promoter-TSS (AT3G04650.1)	promoter-TSS (AT3G04650.1)	436	AT3G04640.2	819622	At.70150	NM_111336		AT3G04640	F7O18.12|F7O18_12	glycine-rich protein	protein-coding
merged_clf_H3K9_q_0.05_with_ctrl.peaks_peak_7960	2	19204354	19204895	+	272	NA	TTS (AT2G46740.1)	TTS (AT2G46740.1)	439	AT2G46735.1	819286	At.28435	NM_130239		AT2G46735	-	death domain associated protein	protein-coding
merged_clf_H3K9_q_0.05_with_ctrl.peaks_peak_7595	2	17774939	17775468	+	272	NA	promoter-TSS (AT2G42670.1)	promoter-TSS (AT2G42670.1)	371	AT2G42680.1	818868	At.14148	NM_129829		MBF1A	ARABIDOPSIS THALIANA MULTIPROTEIN BRIDGING FACTOR 1A|ATMBF1A|F14N22.5|F14N22_5|multiprotein bridging factor 1A	multiprotein bridging factor 1A	protein-coding
merged_clf_H3K9_q_0.05_with_ctrl.peaks_peak_11013	3	19569443	19570574	+	272	NA	TTS (AT3G52810.1)	TTS (AT3G52810.1)	752	AT3G52800.2	824446	At.22407	NM_115140		AT3G52800	-	A20/AN1-like zinc finger family protein	protein-coding
merged_clf_H3K9_q_0.05_with_ctrl.peaks_peak_2055	1	9407476	9408680	+	272	NA	exon (AT1G27100.1, exon 2 of 3)	exon (AT1G27100.1, exon 2 of 3)	-1709	AT1G27090.1	839598	At.23341	NM_102471		AT1G27090	T7N9.15|T7N9_15	glycine-rich protein	protein-coding
merged_clf_H3K9_q_0.05_with_ctrl.peaks_peak_13379	4	11964950	11965680	+	271	NA	exon (AT4G22770.2, exon 2 of 5)	exon (AT4G22770.2, exon 2 of 5)	369	AT4G22770.2	828376	At.32499	NM_118406		AT4G22770	AHL2|AT-hook motif nuclear localized protein 2|T12H17.160|T12H17_160	AT hook motif DNA-binding family protein	protein-coding
merged_clf_H3K9_q_0.05_with_ctrl.peaks_peak_2157	1	9933957	9935264	+	271	NA	exon (AT1G28330.6, exon 2 of 2)	exon (AT1G28330.6, exon 2 of 2)	654	AT1G28330.3	839729	At.25271	NM_102599		DYL1	AtDRM1|DORMANCY-ASSOCIATED PROTEIN 1|DRM1|F3H9.1|F3H9_1|dormancy-associated protein-like 1	dormancy-associated protein-like 1	protein-coding
merged_clf_H3K9_q_0.05_with_ctrl.peaks_peak_10255	3	10518079	10519114	+	271	NA	exon (AT3G28200.1, exon 1 of 1)	exon (AT3G28200.1, exon 1 of 1)	619	AT3G28200.1	822446	At.13955	NM_113739		AT3G28200	-	Peroxidase superfamily protein	protein-coding
merged_clf_H3K9_q_0.05_with_ctrl.peaks_peak_9895	3	8267957	8268726	+	271	NA	exon (AT3G23170.1, exon 1 of 1)	exon (AT3G23170.1, exon 1 of 1)	620	AT3G23170.1	821893	At.37753	NM_113218		AT3G23170	-	hypothetical protein	protein-coding
merged_clf_H3K9_q_0.05_with_ctrl.peaks_peak_11867	4	95234	95955	+	271	NA	exon (AT4G00230.2, exon 6 of 10)	exon (AT4G00230.2, exon 6 of 10)	1700	AT4G00230.2	827949	At.3738	NM_116240		XSP1	F6N15.3|F6N15_3|SUBTILISIN-TYPE SERINE ENDOPEPTIDASE XSP1|xylem serine peptidase 1	xylem serine peptidase 1	protein-coding
merged_clf_H3K9_q_0.05_with_ctrl.peaks_peak_4884	1	29452756	29453697	+	271	NA	promoter-TSS (AT1G78270.1)	promoter-TSS (AT1G78270.1)	671	AT1G78280.1	844163	At.48390	NM_106477		AT1G78280	F3F9.18|F3F9_18	transferases, transferring glycosyl groups	protein-coding
merged_clf_H3K9_q_0.05_with_ctrl.peaks_peak_12013	4	744876	745590	+	271	NA	intron (AT4G01720.1, intron 1 of 5)	intron (AT4G01720.1, intron 1 of 5)	429	AT4G01720.1	828001	At.27833	NM_116402		WRKY47	AtWRKY47|T15B16.12|T15B16_12	WRKY family transcription factor	protein-coding
merged_clf_H3K9_q_0.05_with_ctrl.peaks_peak_1232	1	5390041	5391173	+	271	NA	exon (AT1G15670.1, exon 1 of 1)	exon (AT1G15670.1, exon 1 of 1)	655	AT1G15670.1	838136	At.23684	NM_101435		AT1G15670	F7H2.1|F7H2_1|KFB01|KISS ME DEADLY 2|KMD2|Kelch repeat F-box 1	Galactose oxidase/kelch repeat superfamily protein	protein-coding
merged_clf_H3K9_q_0.05_with_ctrl.peaks_peak_13577	4	12913351	12913947	+	271	NA	TTS (AT4G25190.1)	TTS (AT4G25190.1)	350	AT4G07365.1	28719917		NR_142135		AT4G07365	-	ncRNA	ncRNA
merged_clf_H3K9_q_0.05_with_ctrl.peaks_peak_7932	2	19091953	19093246	+	271	NA	exon (AT2G46510.1, exon 1 of 1)	exon (AT2G46510.1, exon 1 of 1)	774	AT2G46510.1	819262	At.19872	NM_130216		AIB	ABA-inducible BHLH-type transcription factor|ATAIB|F11C10.32|JA-associated MYC2-like 1|JAM1	ABA-inducible BHLH-type transcription factor	protein-coding
merged_clf_H3K9_q_0.05_with_ctrl.peaks_peak_7767	2	18437582	18438717	+	271	NA	promoter-TSS (AT2G44735.1)	promoter-TSS (AT2G44735.1)	416	AT2G44730.1	819080	At.36721	NM_130037		AT2G44730	F16B22.22	Alcohol dehydrogenase transcription factor Myb/SANT-like family protein	protein-coding
merged_clf_H3K9_q_0.05_with_ctrl.peaks_peak_2271	1	10625063	10626003	+	270	NA	exon (AT1G30200.2, exon 1 of 2)	exon (AT1G30200.2, exon 1 of 2)	533	AT1G30200.1	839900	At.20393	NM_102759		AT1G30200	F12P21.1|F12P21_1	F-box family protein	protein-coding
merged_clf_H3K9_q_0.05_with_ctrl.peaks_peak_2365	1	11221611	11222717	+	270	NA	exon (AT1G31350.1, exon 1 of 1)	exon (AT1G31350.1, exon 1 of 1)	625	AT1G31350.1	840024	At.40363	NM_102874		KUF1	KAR-UP F-box 1|T19E23.14|T19E23_14	KAR-UP F-box 1	protein-coding
merged_clf_H3K9_q_0.05_with_ctrl.peaks_peak_10407	3	15971670	15972475	+	270	NA	promoter-TSS (AT3G44280.2)	promoter-TSS (AT3G44280.2)	16	AT3G06755.1	28718948		NR_141278		AT3G06755	-	ncRNA	ncRNA
merged_clf_H3K9_q_0.05_with_ctrl.peaks_peak_11479	3	21745363	21746274	+	270	NA	exon (AT3G58790.1, exon 1 of 6)	exon (AT3G58790.1, exon 1 of 6)	360	AT3G58795.1	5008093		NR_141701		AT3G58795	-	ncRNA	ncRNA
merged_clf_H3K9_q_0.05_with_ctrl.peaks_peak_4210	1	26583418	26583961	+	270	NA	TTS (AT1G70510.1)	TTS (AT1G70510.1)	119	AT1G70518.1	7922283		NR_143597		AT1G70518	-	ncRNA	ncRNA
merged_clf_H3K9_q_0.05_with_ctrl.peaks_peak_4689	1	28578508	28581106	+	269	NA	intron (AT1G76160.1, intron 3 of 7)	intron (AT1G76160.1, intron 3 of 7)	1508	AT1G76160.1	843948	At.21355	NM_106265		sks5	SKU5 similar 5|T23E18.10|T23E18_10	SKU5 similar 5	protein-coding
merged_clf_H3K9_q_0.05_with_ctrl.peaks_peak_15150	5	966211	967316	+	269	NA	exon (AT5G03700.1, exon 1 of 1)	exon (AT5G03700.1, exon 1 of 1)	669	AT5G03700.1	831753	At.65485	NM_120451		AT5G03700	F17C15.120|F17C15_120	D-mannose binding lectin protein with Apple-like carbohydrate-binding domain-containing protein	protein-coding
merged_clf_H3K9_q_0.05_with_ctrl.peaks_peak_1254	1	5464335	5464989	+	269	NA	promoter-TSS (AT1G15910.1)	promoter-TSS (AT1G15910.1)	389	AT1G15900.1	838160	At.51626	NM_101458		AT1G15900	F7H2.24|F7H2_24	transmembrane protein	protein-coding
merged_clf_H3K9_q_0.05_with_ctrl.peaks_peak_12763	4	8639703	8640267	+	269	NA	TTS (AT4G15130.1)	TTS (AT4G15130.1)	306	AT4G15140.1	827180	At.4322	NM_117603		AT4G15140	DL3615C|FCAALL.236	hypothetical protein	protein-coding
merged_clf_H3K9_q_0.05_with_ctrl.peaks_peak_8223	3	594947	596488	+	269	NA	promoter-TSS (AT3G02750.3)	promoter-TSS (AT3G02750.3)	38	AT3G02750.3	820909	At.22072	NM_111143		AT3G02750	F13E7.31|F13E7_31	Protein phosphatase 2C family protein	protein-coding
merged_clf_H3K9_q_0.05_with_ctrl.peaks_peak_5824	2	8531217	8533532	+	269	NA	intron (AT2G19800.1, intron 4 of 10)	intron (AT2G19800.1, intron 4 of 10)	1405	AT2G19800.1	816499	At.12894	NM_127538		MIOX2	F6F22.17|F6F22_17|myo-inositol oxygenase 2	myo-inositol oxygenase 2	protein-coding
merged_clf_H3K9_q_0.05_with_ctrl.peaks_peak_7375	2	16743049	16743838	+	269	NA	intron (AT2G40095.3, intron 1 of 1)	intron (AT2G40095.3, intron 1 of 1)	547	AT2G40095.3	818598	At.45683	NM_179994		AT2G40095	-	Alpha/beta hydrolase related protein	protein-coding
merged_clf_H3K9_q_0.05_with_ctrl.peaks_peak_4220	1	26618357	26619430	+	269	NA	exon (AT1G70590.1, exon 1 of 4)	exon (AT1G70590.1, exon 1 of 4)	794	AT1G70590.1	843396	At.18112	NM_105727		AT1G70590	F24J13.16|F24J13_16	F-box family protein	protein-coding
merged_clf_H3K9_q_0.05_with_ctrl.peaks_peak_12818	4	8984884	8985571	+	268	NA	TTS (AT4G15790.2)	TTS (AT4G15790.2)	440	AT4G15800.1	827260	At.19870	NM_117672		RALFL33	DL3940C|FCAALL.206|ralf-like 33	ralf-like 33	protein-coding
merged_clf_H3K9_q_0.05_with_ctrl.peaks_peak_10741	3	18299101	18300090	+	268	NA	intron (AT3G49350.1, intron 1 of 4)	intron (AT3G49350.1, intron 1 of 4)	594	AT3G49350.1	824097	At.35617	NM_114795		AT3G49350	-	Ypt/Rab-GAP domain of gyp1p superfamily protein	protein-coding
merged_clf_H3K9_q_0.05_with_ctrl.peaks_peak_14901	4	18574717	18575667	+	268	NA	exon (AT4G40063.1, exon 1 of 1)	exon (AT4G40063.1, exon 1 of 1)	122	AT4G40063.1	28720219		NM_001342567		AT4G40063	-	hypothetical protein	protein-coding
merged_clf_H3K9_q_0.05_with_ctrl.peaks_peak_5733	2	7971133	7972078	+	268	NA	TTS (AT2G18340.3)	TTS (AT2G18340.3)	791	AT2G18350.1	816350	At.40008	NM_127392		HB24	AtHB24|T30D6.14|T30D6_14|ZHD6|ZINC FINGER HOMEODOMAIN 6|homeobox protein 24	homeobox protein 24	protein-coding
merged_clf_H3K9_q_0.05_with_ctrl.peaks_peak_10852	3	18894465	18895469	+	268	NA	intron (AT3G50830.1, intron 1 of 3)	intron (AT3G50830.1, intron 1 of 3)	620	AT3G50830.1	824247	At.22366	NM_114943		COR413-PM2	ATCOR413-PM2|cold-regulated 413-plasma membrane 2	cold-regulated 413-plasma membrane 2	protein-coding
merged_clf_H3K9_q_0.05_with_ctrl.peaks_peak_5427	2	2287523	2289356	+	268	NA	exon (AT2G05940.1, exon 3 of 4)	exon (AT2G05940.1, exon 3 of 4)	1197	AT2G05940.1	815147	At.23011	NM_126607		RIPK	RPM1-induced protein kinase|T6P5.14|T6P5_14	Protein kinase superfamily protein	protein-coding
merged_clf_H3K9_q_0.05_with_ctrl.peaks_peak_5129	1	30403053	30404683	+	268	NA	TTS (AT1G80910.1)	TTS (AT1G80910.1)	845	AT1G80920.1	844432	At.21479	NM_106740		J8	AtJ8|AtToc12|DJC22|DNA J protein C22|F23A5.28|F23A5_28|Toc12|translocon at the outer envelope membrane of chloroplasts 12	Chaperone DnaJ-domain superfamily protein	protein-coding
merged_clf_H3K9_q_0.05_with_ctrl.peaks_peak_13083	4	10275904	10278496	+	268	NA	exon (AT4G18670.1, exon 1 of 1)	exon (AT4G18670.1, exon 1 of 1)	1594	AT4G18670.1	827601	At.46566	NM_117983		AT4G18670	F28A21.80|F28A21_80	Leucine-rich repeat (LRR) family protein	protein-coding
merged_clf_H3K9_q_0.05_with_ctrl.peaks_peak_8897	3	3442528	3443263	+	268	NA	exon (AT3G10985.1, exon 1 of 1)	exon (AT3G10985.1, exon 1 of 1)	658	AT3G10985.1	2745879	At.20787	NM_202550		SAG20	ARABIDOPSIS THALIANA WOUND-INDUCED PROTEIN 12|ATWI-12|WI12|WOUND-INDUCED PROTEIN 12|senescence associated gene 20	senescence associated gene 20	protein-coding
merged_clf_H3K9_q_0.05_with_ctrl.peaks_peak_1185	1	5211193	5212155	+	268	NA	promoter-TSS (AT1G15150.1)	promoter-TSS (AT1G15150.1)	675	AT1G15140.1	838079	At.22546	NM_101382		AT1G15140	F9L1.8|F9L1_8	FAD/NAD(P)-binding oxidoreductase	protein-coding
merged_clf_H3K9_q_0.05_with_ctrl.peaks_peak_7079	2	15299780	15300561	+	268	NA	exon (AT2G36470.1, exon 1 of 1)	exon (AT2G36470.1, exon 1 of 1)	856	AT2G36470.1	818221	At.37548	NM_129204		AT2G36470	F1O11.10|F1O11_10	DUF868 family protein, putative (DUF868)	protein-coding
merged_clf_H3K9_q_0.05_with_ctrl.peaks_peak_3370	1	21512799	21513945	+	268	NA	exon (AT1G58100.1, exon 1 of 1)	exon (AT1G58100.1, exon 1 of 1)	650	AT1G58100.2	842177	At.43156	NM_104592		TCP8	AtTCP8|T15M6.11|TCP domain protein 8	TCP family transcription factor	protein-coding
merged_clf_H3K9_q_0.05_with_ctrl.peaks_peak_14568	4	17281143	17282714	+	268	NA	exon (AT4G36648.1, exon 2 of 2)	exon (AT4G36648.1, exon 2 of 2)	802	AT4G36648.1	5008185		NR_144117		AT4G36648	-	ncRNA	ncRNA
merged_clf_H3K9_q_0.05_with_ctrl.peaks_peak_15024	5	421371	422021	+	268	NA	intron (AT5G02130.1, intron 1 of 11)	intron (AT5G02130.1, intron 1 of 11)	372	AT5G02130.1	831694	At.23559	NM_120291		NDP1	T7H20.180|T7H20_180	Tetratricopeptide repeat (TPR)-like superfamily protein	protein-coding
merged_clf_H3K9_q_0.05_with_ctrl.peaks_peak_11003	3	19534552	19535490	+	268	NA	exon (AT3G52710.1, exon 1 of 1)	exon (AT3G52710.1, exon 1 of 1)	436	AT3G52710.1	824437	At.35266	NM_115131		AT3G52710	-	hypothetical protein	protein-coding
merged_clf_H3K9_q_0.05_with_ctrl.peaks_peak_15789	5	3862671	3863655	+	268	NA	promoter-TSS (AT5G11975.1)	promoter-TSS (AT5G11975.1)	-114	AT5G11975.1	28721151		NM_001343225		AT5G11975	-	hypothetical protein	protein-coding
merged_clf_H3K9_q_0.05_with_ctrl.peaks_peak_2322	1	10908116	10909626	+	268	NA	promoter-TSS (AT1G30757.1)	promoter-TSS (AT1G30757.1)	-109	AT1G30757.1	839957	At.44265	NM_148492		AT1G30757	-	transmembrane protein	protein-coding
merged_clf_H3K9_q_0.05_with_ctrl.peaks_peak_12287	4	4309999	4310597	+	268	NA	Intergenic	Intergenic	-1075	AT4G07455.1	28719924	At.20125	NM_001340566		AT4G07455	-	hypothetical protein	protein-coding
merged_clf_H3K9_q_0.05_with_ctrl.peaks_peak_6065	2	9838684	9839724	+	268	NA	exon (AT2G23100.1, exon 1 of 1)	exon (AT2G23100.1, exon 1 of 1)	620	AT2G23100.1	816842	At.39343	NM_127874		AT2G23100	F21P24.16|F21P24_16	Cysteine/Histidine-rich C1 domain family protein	protein-coding
merged_clf_H3K9_q_0.05_with_ctrl.peaks_peak_4755	1	28881843	28883061	+	268	NA	exon (AT1G76900.1, exon 1 of 4)	exon (AT1G76900.1, exon 1 of 4)	412	AT1G76900.3	844025	At.17482	NM_106341		TLP1	AtTLP1|F7O12.7|tubby like protein 1	tubby like protein 1	protein-coding
merged_clf_H3K9_q_0.05_with_ctrl.peaks_peak_11873	4	128640	129429	+	268	NA	TTS (AT4G00295.1)	TTS (AT4G00295.1)	453	AT4G00300.1	28719430	At.44524	NM_001203713		AT4G00300	A_IG005I10.16|A_IG005I10_16|F5I10.16|F5I10_16	receptor-like kinase	protein-coding
merged_clf_H3K9_q_0.05_with_ctrl.peaks_peak_5505	2	5925133	5926871	+	268	NA	intron (AT2G14080.1, intron 1 of 3)	intron (AT2G14080.1, intron 1 of 3)	860	AT2G14080.2	815893	At.43244	NM_126980		AT2G14080	T22C12.1	Disease resistance protein (TIR-NBS-LRR class) family	protein-coding
merged_clf_H3K9_q_0.05_with_ctrl.peaks_peak_7852	2	18820711	18821852	+	267	NA	exon (AT2G45685.1, exon 1 of 1)	exon (AT2G45685.1, exon 1 of 1)	608	AT2G45680.1	819176	At.24576	NM_130131		TCP9	F17K2.21|TCP domain protein 9	TCP family transcription factor	protein-coding
merged_clf_H3K9_q_0.05_with_ctrl.peaks_peak_1605	1	7038772	7040090	+	267	NA	exon (AT1G20330.1, exon 1 of 1)	exon (AT1G20330.1, exon 1 of 1)	800	AT1G20330.1	838621	At.186	NM_101884		SMT2	COTYLEDON VASCULAR PATTERN 1|CVP1|F14O10.7|F14O10_7|FRILL1|FRL1|sterol methyltransferase 2	sterol methyltransferase 2	protein-coding
merged_clf_H3K9_q_0.05_with_ctrl.peaks_peak_12563	4	7480727	7481924	+	267	NA	exon (AT4G12690.2, exon 1 of 1)	exon (AT4G12690.2, exon 1 of 1)	684	AT4G12690.1	826881	At.33452	NM_117338		AT4G12690	T20K18.40|T20K18_40	DUF868 family protein (DUF868)	protein-coding
merged_clf_H3K9_q_0.05_with_ctrl.peaks_peak_5986	2	9471397	9472447	+	267	NA	exon (AT2G22300.3, exon 1 of 14)	exon (AT2G22300.3, exon 1 of 14)	699	AT2G22300.1	816762	At.48505	NM_179692		SR1	CALMODULIN-BINDING TRANSCRIPTION ACTIVATOR 3|CAMTA3|T26C19.4|T26C19_4|signal responsive 1	signal responsive 1	protein-coding
merged_clf_H3K9_q_0.05_with_ctrl.peaks_peak_12318	4	5433649	5434265	+	267	NA	exon (AT4G08540.1, exon 2 of 11)	exon (AT4G08540.1, exon 2 of 11)	336	AT4G08540.1	826413	At.33744	NM_116923		AT4G08540	T15F16.15|T15F16_15	DNA-directed RNA polymerase II protein	protein-coding
merged_clf_H3K9_q_0.05_with_ctrl.peaks_peak_13451	4	12326609	12327433	+	266	NA	TTS (AT4G23660.3)	TTS (AT4G23660.3)	630	AT4G23650.1	828465	At.24517	NM_118496		CDPK6	AtCDPK6|CALCIUM-DEPENDENT PROTEIN KINASE 6|CPK3|Calcium dependent protein kinase 3|F9D16.120|F9D16_120|calcium-dependent protein kinase 6	calcium-dependent protein kinase 6	protein-coding
merged_clf_H3K9_q_0.05_with_ctrl.peaks_peak_401	1	1746123	1747242	+	266	NA	intron (AT1G05805.1, intron 2 of 5)	intron (AT1G05805.1, intron 2 of 5)	-1577	AT1G05810.2	837091	At.11934	NM_100462		RABA5E	ARA|ARA-1|ARABIDOPSIS THALIANA RAB GTPASE HOMOLOG A5E|ATRAB11D|ATRABA5E|RAB GTPase homolog A5E|T20M3.8|T20M3_8	Rab GTPase-like A5A protein	protein-coding
merged_clf_H3K9_q_0.05_with_ctrl.peaks_peak_8681	3	2484467	2485787	+	266	NA	TTS (AT3G07770.1)	TTS (AT3G07770.1)	673	AT3G07780.1	819969	At.25420	NM_111657		OBE1	OBERON1	potyvirus VPg interacting protein (DUF1423)	protein-coding
merged_clf_H3K9_q_0.05_with_ctrl.peaks_peak_14352	4	16354943	16356459	+	266	NA	intron (AT4G34150.1, intron 4 of 6)	intron (AT4G34150.1, intron 4 of 6)	844	AT4G34150.1	829563	At.20546	NM_119578		AT4G34150	F28A23.90|F28A23_90	Calcium-dependent lipid-binding (CaLB domain) family protein	protein-coding
merged_clf_H3K9_q_0.05_with_ctrl.peaks_peak_8230	3	616429	617434	+	266	NA	TTS (AT3G02830.1)	TTS (AT3G02830.1)	143	AT3G01155.1	28718464		NR_140811		AT3G01155	-	ncRNA	ncRNA
merged_clf_H3K9_q_0.05_with_ctrl.peaks_peak_7346	2	16643629	16645034	+	266	NA	exon (AT2G39870.1, exon 2 of 4)	exon (AT2G39870.1, exon 2 of 4)	950	AT2G39870.1	818574	At.24826	NM_129545		AT2G39870	T28M21.3|T28M21_3	hypothetical protein	protein-coding
merged_clf_H3K9_q_0.05_with_ctrl.peaks_peak_10050	3	9312364	9313500	+	266	NA	intron (AT3G25610.1, intron 1 of 9)	intron (AT3G25610.1, intron 1 of 9)	667	AT3G25610.1	822148	At.49391	NM_113459		AT3G25610	T5M7.10	ATPase E1-E2 type family protein / haloacid dehalogenase-like hydrolase family protein	protein-coding
merged_clf_H3K9_q_0.05_with_ctrl.peaks_peak_2645	1	16310064	16310882	+	265	NA	exon (AT1G43245.2, exon 1 of 4)	exon (AT1G43245.2, exon 1 of 4)	527	AT1G43245.2	840925	At.49948	NM_148531		AT1G43245	-	SET domain-containing protein	protein-coding
merged_clf_H3K9_q_0.05_with_ctrl.peaks_peak_10775	3	18468242	18469711	+	265	NA	exon (AT3G49790.1, exon 1 of 1)	exon (AT3G49790.1, exon 1 of 1)	986	AT3G49790.1	824141	At.35568	NM_114839		AT3G49790	-	Carbohydrate-binding protein	protein-coding
merged_clf_H3K9_q_0.05_with_ctrl.peaks_peak_10404	3	15914884	15915410	+	265	NA	Intergenic	Intergenic	-1123	AT3G44210.1	823544	At.53723	NM_114289		AT3G44210	-	hypothetical protein	protein-coding
merged_clf_H3K9_q_0.05_with_ctrl.peaks_peak_4045	1	25782178	25783897	+	265	NA	exon (AT1G68670.1, exon 3 of 5)	exon (AT1G68670.1, exon 3 of 5)	1236	AT1G68670.1	843197	At.27154	NM_105539		AT1G68670	F24J5.9|F24J5_9	myb-like transcription factor family protein	protein-coding
merged_clf_H3K9_q_0.05_with_ctrl.peaks_peak_8648	3	2387100	2388433	+	265	NA	promoter-TSS (AT3G07480.1)	promoter-TSS (AT3G07480.1)	909	AT3G07470.2	819935	At.18422	NM_111625		AT3G07470	-	transmembrane protein, putative (Protein of unknown function, DUF538)	protein-coding
merged_clf_H3K9_q_0.05_with_ctrl.peaks_peak_13913	4	14450065	14450920	+	264	NA	TTS (AT4G29360.2)	TTS (AT4G29360.2)	604	AT4G29350.1	829056	At.24227	NM_119080		PFN2	F17A13.170|F17A13_170|PRF2|PRO2|PROFILIN|PROFILIN 2|profilin 2	profilin 2	protein-coding
merged_clf_H3K9_q_0.05_with_ctrl.peaks_peak_5665	2	7592888	7594087	+	264	NA	intron (AT2G17480.1, intron 1 of 14)	intron (AT2G17480.1, intron 1 of 14)	708	AT2G17480.1	816254	At.14583	NM_127302		MLO8	ATMLO8|F5J6.21|MILDEW RESISTANCE LOCUS O 8	Seven transmembrane MLO family protein	protein-coding
merged_clf_H3K9_q_0.05_with_ctrl.peaks_peak_19152	5	26051352	26052609	+	264	NA	TTS (AT5G65207.1)	TTS (AT5G65207.1)	227	AT5G65205.1	836644	At.26303	NM_125918		AT5G65205	-	NAD(P)-binding Rossmann-fold superfamily protein	protein-coding
merged_clf_H3K9_q_0.05_with_ctrl.peaks_peak_10186	3	10045961	10047307	+	264	NA	intron (AT3G27210.1, intron 2 of 3)	intron (AT3G27210.1, intron 2 of 3)	819	AT3G27210.1	822340	At.6167	NM_113635		AT3G27210	-	hypothetical protein	protein-coding
merged_clf_H3K9_q_0.05_with_ctrl.peaks_peak_5449	2	2921684	2922135	+	264	NA	intron (AT2G07042.1, intron 1 of 2)	intron (AT2G07042.1, intron 1 of 2)	340	AT2G07042.1	6241285		NR_143735		AT2G07042	-	ncRNA	ncRNA
merged_clf_H3K9_q_0.05_with_ctrl.peaks_peak_17514	5	17829826	17831126	+	264	NA	exon (AT5G44260.1, exon 1 of 1)	exon (AT5G44260.1, exon 1 of 1)	860	AT5G44260.1	834449	At.20940	NM_123793		AT5G44260	AtTZF5|K9L2.1|K9L2_1|TZF5|Tandem CCCH Zinc Finger protein 5	Zinc finger C-x8-C-x5-C-x3-H type family protein	protein-coding
merged_clf_H3K9_q_0.05_with_ctrl.peaks_peak_2604	1	13450218	13453097	+	264	NA	exon (AT1G36050.2, exon 6 of 13)	exon (AT1G36050.2, exon 6 of 13)	1453	AT1G36050.1	840509	At.28182	NM_103301		AT1G36050	F5J5.4|F5J5_4	Endoplasmic reticulum vesicle transporter protein	protein-coding
merged_clf_H3K9_q_0.05_with_ctrl.peaks_peak_13774	4	13813094	13813748	+	264	NA	exon (AT4G27657.1, exon 1 of 1)	exon (AT4G27657.1, exon 1 of 1)	432	AT4G27657.1	828879	At.32080	NM_118904		AT4G27657	-	hypothetical protein	protein-coding
merged_clf_H3K9_q_0.05_with_ctrl.peaks_peak_1416	1	6190734	6191632	+	264	NA	TTS (AT1G17990.2)	TTS (AT1G17990.2)	524	AT1G17980.2	838378	At.26787	NM_101661		PAPS1	F2H15.20|F2H15_20|poly(A) polymerase 1	poly(A) polymerase 1	protein-coding
merged_clf_H3K9_q_0.05_with_ctrl.peaks_peak_1344	1	5867643	5868464	+	264	NA	TTS (AT1G17150.1)	TTS (AT1G17150.1)	418	AT1G17160.2	838287	At.18939	NM_101577		AT1G17160	F20D23.14|F20D23_14	pfkB-like carbohydrate kinase family protein	protein-coding
merged_clf_H3K9_q_0.05_with_ctrl.peaks_peak_5737	2	7995781	7997151	+	264	NA	TTS (AT2G18450.1)	TTS (AT2G18450.1)	732	AT2G18440.1	816358		NR_143752		GUT15	GENE WITH UNSTABLE TRANSCRIPT 15|T30D6.5|T30D6_5	ncRNA	ncRNA
merged_clf_H3K9_q_0.05_with_ctrl.peaks_peak_1365	1	5955619	5957197	+	263	NA	intron (AT1G17380.1, intron 2 of 3)	intron (AT1G17380.1, intron 2 of 3)	847	AT1G17380.3	838310	At.27828	NM_101599		JAZ5	F28G4.16|TIFY11A|jasmonate-zim-domain protein 5	jasmonate-zim-domain protein 5	protein-coding
merged_clf_H3K9_q_0.05_with_ctrl.peaks_peak_4376	1	27308547	27310171	+	263	NA	exon (AT1G72520.1, exon 2 of 6)	exon (AT1G72520.1, exon 2 of 6)	846	AT1G72520.1	843584	At.18241	NM_105911		LOX4	ATLOX4|Arabidopsis thaliana lipoxygenase 4|T10D10.1|T10D10_1|lipoxygenase 4	PLAT/LH2 domain-containing lipoxygenase family protein	protein-coding
merged_clf_H3K9_q_0.05_with_ctrl.peaks_peak_13646	4	13220334	13222232	+	263	NA	exon (AT4G26080.1, exon 1 of 4)	exon (AT4G26080.1, exon 1 of 4)	1093	AT4G26080.1	828714	At.21332	NM_118741		ABI1	ABA INSENSITIVE 1|AtABI1|F20B18.190|F20B18_190|PROTEIN PHOSPHATASE 2C ABI1	Protein phosphatase 2C family protein	protein-coding
merged_clf_H3K9_q_0.05_with_ctrl.peaks_peak_8975	3	3729760	3730965	+	263	NA	exon (AT3G11820.2, exon 2 of 3)	exon (AT3G11820.2, exon 2 of 3)	889	AT3G11820.1	820355	At.11000	NM_112015		SYP121	AT-SYR1|ATSYP121|ATSYR1|PEN1|PENETRATION1|SYNTAXIN RELATED PROTEIN 1|SYR1|syntaxin of plants 121	syntaxin of plants 121	protein-coding
merged_clf_H3K9_q_0.05_with_ctrl.peaks_peak_9640	3	6803144	6804203	+	263	NA	exon (AT3G19580.2, exon 1 of 2)	exon (AT3G19580.2, exon 1 of 2)	441	AT3G19580.2	821495	At.23023	NM_112848		ZF2	AZF2|MMB12.27|zinc-finger protein 2	zinc-finger protein 2	protein-coding
merged_clf_H3K9_q_0.05_with_ctrl.peaks_peak_4590	1	28148842	28150383	+	263	NA	intron (AT1G74950.1, intron 2 of 4)	intron (AT1G74950.1, intron 2 of 4)	832	AT1G74950.2	843834	At.19896	NM_106153		TIFY10B	F25A4.8|F25A4_8|JASMONATE-ZIM-DOMAIN PROTEIN 2|JAZ2	TIFY domain/Divergent CCT motif family protein	protein-coding
merged_clf_H3K9_q_0.05_with_ctrl.peaks_peak_9728	3	7285212	7286229	+	263	NA	exon (AT3G20830.1, exon 1 of 1)	exon (AT3G20830.1, exon 1 of 1)	722	AT3G20830.1	821631	At.49615	NM_112974		UCNL	AGC2 kinase 4|AGC2-4|UNICORN-like	AGC (cAMP-dependent, cGMP-dependent and protein kinase C) kinase family protein	protein-coding
merged_clf_H3K9_q_0.05_with_ctrl.peaks_peak_6287	2	11120927	11121767	+	263	NA	exon (AT2G26110.1, exon 1 of 1)	exon (AT2G26110.1, exon 1 of 1)	824	AT2G26110.1	817151	At.21501	NM_128169		AT2G26110	T19L18.8|T19L18_8	bromodomain protein (DUF761)	protein-coding
merged_clf_H3K9_q_0.05_with_ctrl.peaks_peak_14323	4	16260702	16262082	+	263	NA	exon (AT4G33920.2, exon 1 of 3)	exon (AT4G33920.2, exon 1 of 3)	872	AT4G33920.3	829536	At.2397	NM_119551		AT4G33920	APD5|Arabidopsis Pp2c clade D 5|F17I5.110|F17I5_110	Protein phosphatase 2C family protein	protein-coding
merged_clf_H3K9_q_0.05_with_ctrl.peaks_peak_1031	1	4592792	4593650	+	263	NA	intron (AT1G13390.1, intron 2 of 2)	intron (AT1G13390.1, intron 2 of 2)	1230	AT1G13390.1	837899	At.43692	NM_101209		AT1G13390	T6J4.14|T6J4_14	translocase subunit seca	protein-coding
merged_clf_H3K9_q_0.05_with_ctrl.peaks_peak_7315	2	16484215	16484943	+	263	NA	promoter-TSS (AT2G39480.2)	promoter-TSS (AT2G39480.2)	460	AT2G39480.1	818533	At.37167	NM_129506		ABCB6	ATP-binding cassette B6|F12L6.14|F12L6_14|P-glycoprotein 6|PGP6	P-glycoprotein 6	protein-coding
merged_clf_H3K9_q_0.05_with_ctrl.peaks_peak_1740	1	7696574	7697815	+	263	NA	exon (AT1G21910.1, exon 1 of 1)	exon (AT1G21910.1, exon 1 of 1)	767	AT1G21910.1	838793	At.41636	NM_102039		DREB26	T26F17.14|T26F17_14|dehydration response element-binding protein 26	Integrase-type DNA-binding superfamily protein	protein-coding
merged_clf_H3K9_q_0.05_with_ctrl.peaks_peak_19015	5	25570973	25571588	+	263	NA	TTS (AT5G63900.1)	TTS (AT5G63900.1)	306	AT5G63905.2	836511	At.28975	NM_125786		AT5G63905	-	transmembrane protein	protein-coding
merged_clf_H3K9_q_0.05_with_ctrl.peaks_peak_9277	3	5118283	5119467	+	263	NA	exon (AT3G15200.1, exon 1 of 1)	exon (AT3G15200.1, exon 1 of 1)	185	AT3G15200.1	820751	At.21189	NM_112383		AT3G15200	-	Tetratricopeptide repeat (TPR)-like superfamily protein	protein-coding
merged_clf_H3K9_q_0.05_with_ctrl.peaks_peak_18815	5	24764258	24765305	+	263	NA	TTS (AT5G61580.2)	TTS (AT5G61580.2)	730	AT5G61590.1	836280	At.24138	NM_125552		AT5G61590	DEWAX|Decrease Wax Biosynthesis|K11J9.4|K11J9_4	Integrase-type DNA-binding superfamily protein	protein-coding
merged_clf_H3K9_q_0.05_with_ctrl.peaks_peak_9057	3	4083110	4083676	+	263	NA	promoter-TSS (AT3G12835.1)	promoter-TSS (AT3G12835.1)	-24	AT3G12835.1	6240815	At.73678	NM_001125146		AT3G12835	-	hypothetical protein	protein-coding
merged_clf_H3K9_q_0.05_with_ctrl.peaks_peak_9051	3	4049595	4050600	+	263	NA	promoter-TSS (AT3G02585.1)	promoter-TSS (AT3G02585.1)	-36	AT3G02585.1	28718584		NR_140927		AT3G02585	-	ncRNA	ncRNA
merged_clf_H3K9_q_0.05_with_ctrl.peaks_peak_5757	2	8118864	8119992	+	263	NA	intron (AT2G18730.1, intron 1 of 11)	intron (AT2G18730.1, intron 1 of 11)	692	AT2G18730.1	816388	At.27505	NM_179649		DGK3	ATDGK3|MSF3.11|MSF3_11|diacylglycerol kinase 3	diacylglycerol kinase 3	protein-coding
merged_clf_H3K9_q_0.05_with_ctrl.peaks_peak_11393	3	21306762	21307995	+	263	NA	exon (AT3G57550.2, exon 3 of 11)	exon (AT3G57550.2, exon 3 of 11)	357	AT3G57550.3	824922	At.717	NM_115615		AGK2	GK-2|GUANYLATE KINAS|GUANYLATE KINAS 2|guanylate kinase	guanylate kinase	protein-coding
merged_clf_H3K9_q_0.05_with_ctrl.peaks_peak_153	1	621575	622382	+	263	NA	TTS (AT1G02813.1)	TTS (AT1G02813.1)	525	AT1G02816.1	839308	At.11715	NM_100162		AT1G02816	-	pectinesterase (Protein of unknown function, DUF538)	protein-coding
merged_clf_H3K9_q_0.05_with_ctrl.peaks_peak_17425	5	17357486	17358038	+	263	NA	exon (AT5G43260.1, exon 1 of 1)	exon (AT5G43260.1, exon 1 of 1)	578	AT5G43260.1	834344	At.9492	NM_123692		AT5G43260	MNL12.8|MNL12_8	chaperone protein dnaJ-like protein	protein-coding
merged_clf_H3K9_q_0.05_with_ctrl.peaks_peak_12907	4	9449225	9449919	+	263	NA	exon (AT4G16780.1, exon 2 of 4)	exon (AT4G16780.1, exon 2 of 4)	458	AT4G16780.1	827384	At.24419	NM_117780		HB-2	ARABIDOPSIS THALIANA HOMEOBOX PROTEIN 2|ATHB-2|ATHB2|DL4415W|FCAALL.101|HAT4|homeobox protein 2	homeobox protein 2	protein-coding
merged_clf_H3K9_q_0.05_with_ctrl.peaks_peak_12128	4	1329806	1331106	+	263	NA	TTS (AT4G03020.1)	TTS (AT4G03020.1)	908	AT4G03010.1	828113	At.54104	NM_116535		AT4G03010	T4I9.11|T4I9_11	RNI-like superfamily protein	protein-coding
merged_clf_H3K9_q_0.05_with_ctrl.peaks_peak_5669	2	7617285	7617874	+	263	NA	exon (AT2G17520.1, exon 2 of 8)	exon (AT2G17520.1, exon 2 of 8)	428	AT2G17520.1	816258	At.14585	NM_127306		IRE1A	ARABIDOPSIS THALIANA INOSITOL REQUIRING 1-2|ATIRE1-2|AtIRE1A|INOSITOL REQUIRING 1-2|IRE1-2|MJB20.8|MJB20_8|TRANSMEMBRANE PROTEIN KINASE/RIBONUCLEASE	Endoribonuclease/protein kinase IRE1-like protein	protein-coding
merged_clf_H3K9_q_0.05_with_ctrl.peaks_peak_19274	5	26453941	26455867	+	263	NA	exon (AT5G66200.1, exon 1 of 1)	exon (AT5G66200.1, exon 1 of 1)	1250	AT5G66200.1	836752	At.9222	NM_126018		ARO2	K2A18.28|K2A18_28|armadillo repeat only 2	armadillo repeat only 2	protein-coding
merged_clf_H3K9_q_0.05_with_ctrl.peaks_peak_663	1	2989386	2990195	+	263	NA	exon (AT1G09250.1, exon 1 of 1)	exon (AT1G09250.1, exon 1 of 1)	649	AT1G09250.1	837446	At.43282	NM_100795		AT1G09250	AIF4|ATBS1 Interacting Factor 4|T12M4.4|T12M4_4	basic helix-loop-helix (bHLH) DNA-binding superfamily protein	protein-coding
merged_clf_H3K9_q_0.05_with_ctrl.peaks_peak_640	1	2867399	2869392	+	263	NA	intron (AT1G08920.3, intron 5 of 15)	intron (AT1G08920.3, intron 5 of 15)	1124	AT1G08920.3	837413	At.700	NM_100764		ESL1	ERD (early response to dehydration) six-like 1|F7G19.20|F7G19_20	ERD (early response to dehydration) six-like 1	protein-coding
merged_clf_H3K9_q_0.05_with_ctrl.peaks_peak_12618	4	7790305	7791276	+	263	NA	intron (AT4G13400.1, intron 2 of 13)	intron (AT4G13400.1, intron 2 of 13)	497	AT4G13400.2	826971	At.33378	NM_117414		AT4G13400	T9E8.140|T9E8_140	2-oxoglutarate (2OG) and Fe(II)-dependent oxygenase superfamily protein	protein-coding
merged_clf_H3K9_q_0.05_with_ctrl.peaks_peak_12525	4	7231887	7232431	+	263	NA	TTS (ENSRNA049492449-T1)	TTS (ENSRNA049492449-T1)	340	AT4G12070.1	826815	At.3079	NM_117277		AT4G12070	F16J13.140|F16J13_140	hypothetical protein	protein-coding
merged_clf_H3K9_q_0.05_with_ctrl.peaks_peak_9982	3	8901370	8902700	+	263	NA	exon (AT3G24480.1, exon 1 of 1)	exon (AT3G24480.1, exon 1 of 1)	800	AT3G24480.1	822038	At.37518	NM_113355		AT3G24480	-	Leucine-rich repeat (LRR) family protein	protein-coding
merged_clf_H3K9_q_0.05_with_ctrl.peaks_peak_14035	4	14950453	14951681	+	262	NA	promoter-TSS (AT4G30620.1)	promoter-TSS (AT4G30620.1)	747	AT4G30630.1	829186	At.31818	NM_119209		AT4G30630	F17I23.30|F17I23_30	hypothetical protein	protein-coding
merged_clf_H3K9_q_0.05_with_ctrl.peaks_peak_15977	5	4752923	4753598	+	262	NA	intron (AT5G14720.2, intron 1 of 20)	intron (AT5G14720.2, intron 1 of 20)	521	AT5G14720.2	831324	At.20062	NM_121476		AT5G14720	T9L3.20|T9L3_20	Protein kinase superfamily protein	protein-coding
merged_clf_H3K9_q_0.05_with_ctrl.peaks_peak_13817	4	13959737	13960797	+	262	NA	TTS (AT4G28088.1)	TTS (AT4G28088.1)	297	AT4G28085.2	828924	At.26176	NM_118948		AT4G28085	-	transmembrane protein	protein-coding
merged_clf_H3K9_q_0.05_with_ctrl.peaks_peak_11835	3	23411195	23411964	+	262	NA	promoter-TSS (AT3G63400.1)	promoter-TSS (AT3G63400.1)	409	AT3G63390.1	825514	At.33935	NM_116204		AT3G63390	-	hypothetical protein	protein-coding
merged_clf_H3K9_q_0.05_with_ctrl.peaks_peak_9477	3	5991969	5992824	+	262	NA	promoter-TSS (AT3G17510.2)	promoter-TSS (AT3G17510.2)	-318	AT3G17510.2	821016	At.21023	NM_112631		CIPK1	CBL-interacting protein kinase 1|SNF1-RELATED PROTEIN KINASE 3.16|SnRK3.16	CBL-interacting protein kinase 1	protein-coding
merged_clf_H3K9_q_0.05_with_ctrl.peaks_peak_12283	4	4195688	4196332	+	262	NA	exon (AT4G07390.2, exon 2 of 9)	exon (AT4G07390.2, exon 2 of 9)	446	AT4G07390.2	826170	At.25518	NM_116811		AT4G07390	F28D6.6|F28D6_6	Mannose-P-dolichol utilization defect 1 protein	protein-coding
merged_clf_H3K9_q_0.05_with_ctrl.peaks_peak_5073	1	30241611	30243113	+	262	NA	exon (AT1G80440.1, exon 1 of 1)	exon (AT1G80440.1, exon 1 of 1)	910	AT1G80440.1	844383	At.21261	NM_106692		AT1G80440	KFB20|KISS ME DEADLY 1|KMD1|Kelch repeat F-box 20|T21F11.23|T21F11_23	Galactose oxidase/kelch repeat superfamily protein	protein-coding
merged_clf_H3K9_q_0.05_with_ctrl.peaks_peak_4679	1	28546514	28547554	+	261	NA	TTS (AT1G76080.1)	TTS (AT1G76080.1)	652	AT1G76070.1	843939	At.34705	NM_106256		AT1G76070	T23E18.1|T23E18_1	hypothetical protein	protein-coding
merged_clf_H3K9_q_0.05_with_ctrl.peaks_peak_1016	1	4542314	4543931	+	261	NA	exon (AT1G13260.1, exon 1 of 1)	exon (AT1G13260.1, exon 1 of 1)	954	AT1G13260.1	837886	At.20558	NM_101197		RAV1	AtRAV1|EDF4|ETHYLENE RESPONSE DNA BINDING FACTOR 4|T6J4.2|T6J4_2|related to ABI3/VP1 1	related to ABI3/VP1 1	protein-coding
merged_clf_H3K9_q_0.05_with_ctrl.peaks_peak_13576	4	12909615	12910482	+	261	NA	exon (AT4G25170.1, exon 1 of 4)	exon (AT4G25170.1, exon 1 of 4)	473	AT4G25170.2	828620	At.302	NM_118649		AT4G25170	F24A6.10|F24A6_10	Uncharacterized conserved protein (UCP012943)	protein-coding
merged_clf_H3K9_q_0.05_with_ctrl.peaks_peak_7464	2	17140318	17141188	+	261	NA	TTS (AT2G41120.1)	TTS (AT2G41120.1)	263	AT2G09225.1	28718108		NR_140493		AT2G09225	-	ncRNA	ncRNA
merged_clf_H3K9_q_0.05_with_ctrl.peaks_peak_8109	3	165686	166324	+	261	NA	TTS (AT3G01435.3)	TTS (AT3G01435.3)	537	AT3G01430.1	821144	At.41278	NM_111009		AT3G01430	T13O15.7|T13O15_7	NHL domain protein	protein-coding
merged_clf_H3K9_q_0.05_with_ctrl.peaks_peak_2507	1	12177792	12179242	+	261	NA	exon (AT1G33590.2, exon 1 of 1)	exon (AT1G33590.2, exon 1 of 1)	815	AT1G33590.1	840253	At.26728	NM_103082		AT1G33590	T1E4.3|T1E4_3	Leucine-rich repeat (LRR) family protein	protein-coding
merged_clf_H3K9_q_0.05_with_ctrl.peaks_peak_15078	5	652119	652977	+	261	NA	TTS (AT5G02840.2)	TTS (AT5G02840.2)	500	AT5G02850.1	831762	At.4977	NM_120363		AT5G02850	F9G14.160|F9G14_160	hydroxyproline-rich glycoprotein family protein	protein-coding
merged_clf_H3K9_q_0.05_with_ctrl.peaks_peak_7075	2	15286401	15287259	+	261	NA	exon (AT2G36420.1, exon 1 of 3)	exon (AT2G36420.1, exon 1 of 3)	709	AT2G36420.1	818216	At.37555	NM_129199		TRM27	F1O11.5|F1O11_5|TON1 Recruiting Motif 27	nucleolin-like protein	protein-coding
merged_clf_H3K9_q_0.05_with_ctrl.peaks_peak_2628	1	15651932	15652501	+	261	NA	intron (AT1G41880.2, intron 2 of 4)	intron (AT1G41880.2, intron 2 of 4)	326	AT1G41880.1	840799	At.24952	NM_001333197		AT1G41880	F5A13.4|F5A13_4	Ribosomal protein L35Ae family protein	protein-coding
merged_clf_H3K9_q_0.05_with_ctrl.peaks_peak_9951	3	8603480	8604981	+	261	NA	exon (AT3G23820.1, exon 1 of 1)	exon (AT3G23820.1, exon 1 of 1)	1018	AT3G23820.1	821965	At.24934	NM_113287		GAE6	UDP-D-glucuronate 4-epimerase 6	UDP-D-glucuronate 4-epimerase 6	protein-coding
merged_clf_H3K9_q_0.05_with_ctrl.peaks_peak_2118	1	9657392	9657810	+	261	NA	exon (AT1G27750.1, exon 1 of 8)	exon (AT1G27750.1, exon 1 of 8)	428	AT1G27750.1	839668	At.41014	NM_102540		AT1G27750	T22C5.20|T22C5_20	nucleic acid binding protein	protein-coding
merged_clf_H3K9_q_0.05_with_ctrl.peaks_peak_13932	4	14517466	14518259	+	260	NA	exon (AT4G29610.1, exon 1 of 1)	exon (AT4G29610.1, exon 1 of 1)	469	AT4G29610.1	829082	At.54547	NM_119106		AT4G29610	T16L4.120|T16L4_120	Cytidine/deoxycytidylate deaminase family protein	protein-coding
merged_clf_H3K9_q_0.05_with_ctrl.peaks_peak_12257	4	2664407	2665183	+	260	NA	exon (AT4G05160.1, exon 1 of 6)	exon (AT4G05160.1, exon 1 of 6)	481	AT4G05160.1	825864	At.33913	NM_116755		AT4G05160	C17L7.80|C17L7_80	AMP-dependent synthetase and ligase family protein	protein-coding
merged_clf_H3K9_q_0.05_with_ctrl.peaks_peak_17970	5	20543485	20544751	+	260	NA	exon (AT5G50450.1, exon 3 of 3)	exon (AT5G50450.1, exon 3 of 3)	739	AT5G50450.1	835113	At.24402	NM_124427		AT5G50450	MXI22.17|MXI22_17	HCP-like superfamily protein with MYND-type zinc finger	protein-coding
merged_clf_H3K9_q_0.05_with_ctrl.peaks_peak_7774	2	18468762	18469284	+	260	NA	promoter-TSS (AT2G44798.4)	promoter-TSS (AT2G44798.4)	242	AT2G44798.5	5007962		NR_140768		AT2G44798	-	ncRNA	ncRNA
merged_clf_H3K9_q_0.05_with_ctrl.peaks_peak_11827	3	23373872	23374948	+	260	NA	TTS (AT3G63255.1)	TTS (AT3G63255.1)	928	AT3G63260.2	825501	At.20368	NM_116191		ATMRK1	-	Protein kinase superfamily protein	protein-coding
merged_clf_H3K9_q_0.05_with_ctrl.peaks_peak_14520	4	17048676	17050258	+	260	NA	exon (AT4G36040.1, exon 1 of 1)	exon (AT4G36040.1, exon 1 of 1)	1141	AT4G36040.1	829760	At.20876	NM_119771		J11	DJC23|DNA J protein C23|DnaJ11|T19K4.170|T19K4_170	Chaperone DnaJ-domain superfamily protein	protein-coding
merged_clf_H3K9_q_0.05_with_ctrl.peaks_peak_1432	1	6267810	6268788	+	260	NA	exon (AT1G18210.2, exon 1 of 2)	exon (AT1G18210.2, exon 1 of 2)	529	AT1G18210.2	838401	At.22394	NM_101681		AT1G18210	T10F20.22	Calcium-binding EF-hand family protein	protein-coding
merged_clf_H3K9_q_0.05_with_ctrl.peaks_peak_14632	4	17524468	17525045	+	260	NA	exon (AT4G37240.1, exon 1 of 1)	exon (AT4G37240.1, exon 1 of 1)	295	AT4G37240.1	829878	At.43110	NM_119887		AT4G37240	AP22.53|AP22_53	HTH-type transcriptional regulator	protein-coding
merged_clf_H3K9_q_0.05_with_ctrl.peaks_peak_17342	5	16815500	16817104	+	260	NA	exon (AT5G42050.1, exon 1 of 4)	exon (AT5G42050.1, exon 1 of 4)	992	AT5G42050.1	834210	At.21438	NM_123570		AT5G42050	MJC20.15|MJC20_15	DCD (Development and Cell Death) domain protein	protein-coding
merged_clf_H3K9_q_0.05_with_ctrl.peaks_peak_11915	4	302648	304406	+	260	NA	intron (AT4G00730.2, intron 2 of 7)	intron (AT4G00730.2, intron 2 of 7)	981	AT4G00730.2	828022	At.24442	NM_116298		ANL2	AHDP|ANTHOCYANINLESS 2|ARABIDOPSIS THALIANA HOMEODOMAIN PROTEIN|F6N23.10|F6N23_10|HOMEODOMAIN PROTEIN AHDP	Homeobox-leucine zipper family protein / lipid-binding START domain-containing protein	protein-coding
merged_clf_H3K9_q_0.05_with_ctrl.peaks_peak_3737	1	23941870	23942794	+	260	NA	TTS (AT1G64455.1)	TTS (AT1G64455.1)	568	AT1G64455.1	28717395		NM_001334161		AT1G64455	-	collagen triple helix protein	protein-coding
merged_clf_H3K9_q_0.05_with_ctrl.peaks_peak_12073	4	1058984	1059600	+	260	NA	TTS (AT4G02410.1)	TTS (AT4G02410.1)	379	AT4G02405.2	2745606	At.26158	NM_202773		AT4G02405	-	S-adenosyl-L-methionine-dependent methyltransferases superfamily protein	protein-coding
merged_clf_H3K9_q_0.05_with_ctrl.peaks_peak_1417	1	6204386	6204946	+	259	NA	TTS (AT1G18020.1)	TTS (AT1G18020.1)	335	AT1G18030.1	838383	At.14957	NM_101665		AT1G18030	T10F20.4|T10F20_4	Protein phosphatase 2C family protein	protein-coding
merged_clf_H3K9_q_0.05_with_ctrl.peaks_peak_14840	4	18315649	18316624	+	259	NA	exon (AT4G39390.3, exon 2 of 7)	exon (AT4G39390.3, exon 2 of 7)	531	AT4G39390.3	830094	At.27447	NM_120099		NST-K1	A. THALIANA NUCLEOTIDE SUGAR TRANSPORTER-KT 1|ATNST-KT1|F23K16.20|F23K16_20|UDP-Rha/UDP-Gal transporter 4|URGT4|nucleotide sugar transporter-KT 1	nucleotide sugar transporter-KT 1	protein-coding
merged_clf_H3K9_q_0.05_with_ctrl.peaks_peak_6919	2	14573154	14573974	+	259	NA	exon (AT2G34600.1, exon 2 of 2)	exon (AT2G34600.1, exon 2 of 2)	534	AT2G34600.1	818025	At.37783	NM_129014		JAZ7	T31E10.6|T31E10_6|TIFY5B|jasmonate-zim-domain protein 7	jasmonate-zim-domain protein 7	protein-coding
merged_clf_H3K9_q_0.05_with_ctrl.peaks_peak_8547	3	1970275	1970749	+	259	NA	exon (AT3G06435.2, exon 1 of 2)	exon (AT3G06435.2, exon 1 of 2)	172	AT3G06436.1	28718919		NM_001337655		AT3G06436	-	hypothetical protein	protein-coding
merged_clf_H3K9_q_0.05_with_ctrl.peaks_peak_435	1	1944136	1944908	+	259	NA	promoter-TSS (AT1G06380.1)	promoter-TSS (AT1G06380.1)	-471	AT1G06380.1	837149	At.42343	NM_100518		AT1G06380	T2D23.8|T2D23_8	Ribosomal protein L1p/L10e family	protein-coding
merged_clf_H3K9_q_0.05_with_ctrl.peaks_peak_14686	4	17708160	17708977	+	259	NA	exon (AT4G37690.1, exon 1 of 1)	exon (AT4G37690.1, exon 1 of 1)	674	AT4G37690.1	829924	At.45313	NM_148407		AT4G37690	-	Galactosyl transferase GMA12/MNN10 family protein	protein-coding
merged_clf_H3K9_q_0.05_with_ctrl.peaks_peak_499	1	2189264	2190605	+	259	NA	TTS (AT1G07135.1)	TTS (AT1G07135.1)	850	AT1G07135.1	837224	At.45818	NM_100587		AT1G07135	-	glycine-rich protein	protein-coding
merged_clf_H3K9_q_0.05_with_ctrl.peaks_peak_3054	1	19689270	19690486	+	259	NA	exon (AT1G52880.1, exon 2 of 3)	exon (AT1G52880.1, exon 2 of 3)	711	AT1G52880.1	841721	At.11024	NM_104166		NAM	ANAC018|ATNAM|Arabidopsis NAC domain containing protein 18|F14G24.15|F14G24_15|NAC DOMAIN PROTEIN NAM|NAC-REGULATED SEED MORPHOLOGY 2|NARS2|NO APICAL MERISTEM	NAC (No Apical Meristem) domain transcriptional regulator superfamily protein	protein-coding
merged_clf_H3K9_q_0.05_with_ctrl.peaks_peak_19187	5	26172122	26173470	+	259	NA	intron (AT5G65470.1, intron 1 of 7)	intron (AT5G65470.1, intron 1 of 7)	787	AT5G65470.1	836672	At.22388	NM_125945		AT5G65470	MNA5.21|MNA5_21	O-fucosyltransferase family protein	protein-coding
merged_clf_H3K9_q_0.05_with_ctrl.peaks_peak_6087	2	9938079	9938638	+	259	NA	exon (AT2G23340.1, exon 1 of 1)	exon (AT2G23340.1, exon 1 of 1)	566	AT2G23340.1	816866	At.43320	NM_127898		DEAR3	DREB and EAR motif protein 3|T20D16.3|T20D16_3	DREB and EAR motif protein 3	protein-coding
merged_clf_H3K9_q_0.05_with_ctrl.peaks_peak_7895	2	18963136	18963923	+	259	NA	exon (AT2G46160.2, exon 1 of 2)	exon (AT2G46160.2, exon 1 of 2)	446	AT2G46160.2	819223	At.37022	NM_130178		AT2G46160	T3F17.19	RING/U-box superfamily protein	protein-coding
merged_clf_H3K9_q_0.05_with_ctrl.peaks_peak_16049	5	5087064	5088053	+	258	NA	TTS (AT5G15630.1)	TTS (AT5G15630.1)	339	AT5G15640.2	831418	At.10150	NM_121568		AT5G15640	F14F8.20|F14F8_20	Mitochondrial substrate carrier family protein	protein-coding
merged_clf_H3K9_q_0.05_with_ctrl.peaks_peak_11365	3	21215778	21216540	+	258	NA	promoter-TSS (AT3G57330.2)	promoter-TSS (AT3G57330.2)	677	AT3G57330.1	824900	At.34841	NM_115593		ACA11	autoinhibited Ca2+-ATPase 11	autoinhibited Ca2+-ATPase 11	protein-coding
merged_clf_H3K9_q_0.05_with_ctrl.peaks_peak_16478	5	7164642	7165690	+	258	NA	intron (AT5G21090.1, intron 1 of 5)	intron (AT5G21090.1, intron 1 of 5)	606	AT5G21090.1	832233	At.24114	NM_122117		AT5G21090	-	Leucine-rich repeat (LRR) family protein	protein-coding
merged_clf_H3K9_q_0.05_with_ctrl.peaks_peak_8204	3	536831	537898	+	258	NA	promoter-TSS (AT3G02540.1)	promoter-TSS (AT3G02540.1)	762	AT3G02550.1	821112	At.22633	NM_111122		LBD41	F16B3.18|F16B3_18|LOB domain-containing protein 41	LOB domain-containing protein 41	protein-coding
merged_clf_H3K9_q_0.05_with_ctrl.peaks_peak_134	1	554463	555994	+	258	NA	promoter-TSS (AT1G02610.3)	promoter-TSS (AT1G02610.3)	9	AT1G02610.3	837915		NM_100141		AT1G02610	T14P4.10|T14P4_10	RING/FYVE/PHD zinc finger superfamily protein	protein-coding
merged_clf_H3K9_q_0.05_with_ctrl.peaks_peak_5332	2	1156745	1157531	+	258	NA	exon (AT2G03800.1, exon 2 of 9)	exon (AT2G03800.1, exon 2 of 9)	481	AT2G03800.1	814906	At.41372	NM_126426		GEK1	F19B11.25|F19B11_25|GEKO1	D-aminoacyl-tRNA deacylase	protein-coding
merged_clf_H3K9_q_0.05_with_ctrl.peaks_peak_14331	4	16288070	16288867	+	258	NA	intron (AT4G33985.1, intron 1 of 1)	intron (AT4G33985.1, intron 1 of 1)	503	AT4G33985.1	829545	At.31531	NM_119560		AT4G33985	-	membrane insertase, putative (DUF1685)	protein-coding
merged_clf_H3K9_q_0.05_with_ctrl.peaks_peak_1655	1	7337776	7339119	+	258	NA	exon (AT1G21000.1, exon 3 of 4)	exon (AT1G21000.1, exon 3 of 4)	628	AT1G21000.2	838694	At.21086	NM_101953		AT1G21000	F9H16.1|F9H16_1	PLATZ transcription factor family protein	protein-coding
merged_clf_H3K9_q_0.05_with_ctrl.peaks_peak_10405	3	15952264	15953084	+	258	NA	exon (AT3G44260.1, exon 1 of 1)	exon (AT3G44260.1, exon 1 of 1)	672	AT3G44260.1	823551	At.1713	NM_114294		CAF1a	AtCAF1a|CCR4- associated factor 1a	Polynucleotidyl transferase, ribonuclease H-like superfamily protein	protein-coding
merged_clf_H3K9_q_0.05_with_ctrl.peaks_peak_11499	3	21836568	21837963	+	258	NA	exon (AT3G59080.1, exon 1 of 1)	exon (AT3G59080.1, exon 1 of 1)	686	AT3G59080.2	825077	At.26307	NM_115770		AT3G59080	-	Eukaryotic aspartyl protease family protein	protein-coding
merged_clf_H3K9_q_0.05_with_ctrl.peaks_peak_587	1	2620513	2621570	+	258	NA	TTS (AT1G08320.3)	TTS (AT1G08320.3)	504	AT1G08315.1	837352	At.42266	NM_179282		AT1G08315	-	ARM repeat superfamily protein	protein-coding
merged_clf_H3K9_q_0.05_with_ctrl.peaks_peak_6596	2	12903866	12905156	+	258	NA	TTS (AT2G30260.2)	TTS (AT2G30260.2)	827	AT2G30250.1	817575	At.12235	NM_128578		WRKY25	ATWRKY25|T9D9.6|T9D9_6|WRKY DNA-binding protein 25	WRKY DNA-binding protein 25	protein-coding
merged_clf_H3K9_q_0.05_with_ctrl.peaks_peak_9810	3	7818118	7818750	+	258	NA	TTS (AT3G04245.1)	TTS (AT3G04245.1)	551	AT3G22160.1	821780	At.42989	NM_113113		AT3G22160	JAV1|jasmonate-associated VQ motif gene 1	VQ motif-containing protein	protein-coding
merged_clf_H3K9_q_0.05_with_ctrl.peaks_peak_11904	4	252814	253461	+	258	NA	promoter-TSS (AT4G00585.1)	promoter-TSS (AT4G00585.1)	326	AT4G00590.1	827968	At.44020	NM_116284		AT4G00590	F6N23.5|F6N23_5	N-terminal nucleophile aminohydrolases (Ntn hydrolases) superfamily protein	protein-coding
merged_clf_H3K9_q_0.05_with_ctrl.peaks_peak_6079	2	9904821	9905872	+	258	NA	exon (AT2G23290.1, exon 1 of 1)	exon (AT2G23290.1, exon 1 of 1)	686	AT2G23290.1	816861	At.28681	NM_127893		MYB70	AtMYB70|T20D16.8|T20D16_8|myb domain protein 70	myb domain protein 70	protein-coding
merged_clf_H3K9_q_0.05_with_ctrl.peaks_peak_4740	1	28784580	28785212	+	258	NA	TTS (AT1G09647.1)	TTS (AT1G09647.1)	476	AT1G09647.1	28717131		NR_139666		AT1G09647	-	ncRNA	ncRNA
merged_clf_H3K9_q_0.05_with_ctrl.peaks_peak_4369	1	27283753	27285086	+	258	NA	exon (AT1G72470.1, exon 1 of 1)	exon (AT1G72470.1, exon 1 of 1)	791	AT1G72470.1	843579	At.35095	NM_105906		EXO70D1	ATEXO70D1|T10D10.6|T10D10_6|exocyst subunit exo70 family protein D1	exocyst subunit exo70 family protein D1	protein-coding
merged_clf_H3K9_q_0.05_with_ctrl.peaks_peak_4588	1	28146104	28147128	+	258	NA	exon (AT1G74940.1, exon 1 of 2)	exon (AT1G74940.1, exon 1 of 2)	638	AT1G74940.1	843833	At.27584	NM_106152		AT1G74940	F25A4.9|F25A4_9	cyclin-dependent kinase, putative (DUF581)	protein-coding
merged_clf_H3K9_q_0.05_with_ctrl.peaks_peak_18903	5	25114055	25115294	+	258	NA	promoter-TSS (AT5G62573.1)	promoter-TSS (AT5G62573.1)	253	AT5G62570.2	836377	At.46830	NM_001203668		AT5G62570	CBP60a|K19B1.18|K19B1_18|calmodulin-binding protein 60a	Calmodulin binding protein-like protein	protein-coding
merged_clf_H3K9_q_0.05_with_ctrl.peaks_peak_15152	5	978640	979745	+	258	NA	exon (AT5G03730.2, exon 1 of 16)	exon (AT5G03730.2, exon 1 of 16)	657	AT5G03730.2	831748	At.300	NM_120454		CTR1	AtCTR1|CONSTITUTIVE TRIPLE RESPONSE 1|F17C15.150|F17C15_150|SERINE/THREONINE-PROTEIN KINASE CTR1|SIS1|SUGAR-INSENSITIVE 1	Protein kinase superfamily protein	protein-coding
merged_clf_H3K9_q_0.05_with_ctrl.peaks_peak_16422	5	6833726	6836648	+	258	NA	exon (AT5G20250.1, exon 2 of 4)	exon (AT5G20250.1, exon 2 of 4)	1528	AT5G20250.4	832147	At.25459	NM_122032		DIN10	DARK INDUCIBLE 10|F5O24.140|F5O24_140|RS6|raffinose synthase 6	Raffinose synthase family protein	protein-coding
merged_clf_H3K9_q_0.05_with_ctrl.peaks_peak_9435	3	5761092	5762202	+	258	NA	exon (AT3G16860.1, exon 1 of 2)	exon (AT3G16860.1, exon 1 of 2)	617	AT3G16860.1	820941	At.183	NM_112562		COBL8	COBRA-like protein 8 precursor	COBRA-like protein 8 precursor	protein-coding
merged_clf_H3K9_q_0.05_with_ctrl.peaks_peak_4154	1	26330105	26331944	+	258	NA	exon (AT1G69910.1, exon 1 of 1)	exon (AT1G69910.1, exon 1 of 1)	1161	AT1G69910.1	843327	At.50020	NM_105659		AT1G69910	T17F3.6|T17F3_6	Protein kinase superfamily protein	protein-coding
merged_clf_H3K9_q_0.05_with_ctrl.peaks_peak_19074	5	25743378	25744025	+	258	NA	TTS (AT5G64380.1)	TTS (AT5G64380.1)	355	AT5G64390.3	836560	At.28960	NM_125835		HEN4	HUA ENHANCER 4|MSJ1.23|MSJ1_23	RNA-binding KH domain-containing protein	protein-coding
merged_clf_H3K9_q_0.05_with_ctrl.peaks_peak_4362	1	27264717	27265606	+	258	NA	exon (AT1G72430.1, exon 1 of 1)	exon (AT1G72430.1, exon 1 of 1)	645	AT1G72430.1	843575	At.35101	NM_105902		AT1G72430	SAUR78|SMALL AUXIN UPREGULATED RNA 78|T10D10.10|T10D10_10	SAUR-like auxin-responsive protein family	protein-coding
merged_clf_H3K9_q_0.05_with_ctrl.peaks_peak_4853	1	29345909	29346911	+	258	NA	intron (AT1G78040.1, intron 2 of 2)	intron (AT1G78040.1, intron 2 of 2)	559	AT1G78040.2	844139	At.25076	NM_106453		AT1G78040	F28K19.26|F28K19_26	Pollen Ole e 1 allergen and extensin family protein	protein-coding
merged_clf_H3K9_q_0.05_with_ctrl.peaks_peak_14967	5	211219	213393	+	258	NA	exon (AT5G01542.1, exon 1 of 1)	exon (AT5G01542.1, exon 1 of 1)	1166	AT5G01540.1	831722	At.28701	NM_120232		LECRKA4.1	F7A7.60|F7A7_60|L-type lectin receptor kinase-VI.2|LecRK-VI.2|lectin receptor kinase a4.1	lectin receptor kinase a4.1	protein-coding
merged_clf_H3K9_q_0.05_with_ctrl.peaks_peak_8289	3	850429	851457	+	258	NA	exon (AT3G03550.1, exon 1 of 1)	exon (AT3G03550.1, exon 1 of 1)	798	AT3G03550.1	821237	At.44888	NM_111226		AT3G03550	T12J13.17|T12J13_17	RING/U-box superfamily protein	protein-coding
merged_clf_H3K9_q_0.05_with_ctrl.peaks_peak_8933	3	3591670	3592709	+	258	NA	exon (AT3G11420.1, exon 1 of 3)	exon (AT3G11420.1, exon 1 of 3)	938	AT3G11420.1	820315	At.26897	NM_111975		AT3G11420	-	beta-1,3-N-acetylglucosaminyltransferase lunatic protein, putative (DUF604)	protein-coding
merged_clf_H3K9_q_0.05_with_ctrl.peaks_peak_9042	3	4012619	4013623	+	258	NA	promoter-TSS (AT3G12640.2)	promoter-TSS (AT3G12640.2)	-926	AT3G12640.2	820444	At.42987	NM_112099		AT3G12640	-	RNA binding (RRM/RBD/RNP motifs) family protein	protein-coding
merged_clf_H3K9_q_0.05_with_ctrl.peaks_peak_6086	2	9928984	9930172	+	258	NA	Intergenic	Intergenic	-3109	AT2G07900.1	28717859		NR_140245		AT2G07900	-	ncRNA	ncRNA
merged_clf_H3K9_q_0.05_with_ctrl.peaks_peak_17872	5	19976325	19977464	+	258	NA	exon (AT5G49280.1, exon 1 of 1)	exon (AT5G49280.1, exon 1 of 1)	726	AT5G49280.1	834988	At.20124	NM_124305		AT5G49280	K21P3.16|K21P3_16	hydroxyproline-rich glycoprotein family protein	protein-coding
merged_clf_H3K9_q_0.05_with_ctrl.peaks_peak_4151	1	26323274	26324593	+	258	NA	TTS (AT1G69880.1)	TTS (AT1G69880.1)	1013	AT1G69890.1	843325	At.43696	NM_105657		AT1G69890	T17F3.8|T17F3_8	actin cross-linking protein (DUF569)	protein-coding
merged_clf_H3K9_q_0.05_with_ctrl.peaks_peak_11853	4	13537	14118	+	257	NA	promoter-TSS (AT4G00040.1)	promoter-TSS (AT4G00040.1)	300	AT4G00030.1	828231	At.34610	NM_116220		AT4G00030	F6N15.13|F6N15_13	Plastid-lipid associated protein PAP / fibrillin family protein	protein-coding
merged_clf_H3K9_q_0.05_with_ctrl.peaks_peak_12277	4	3666702	3667556	+	257	NA	exon (AT4G06599.1, exon 2 of 6)	exon (AT4G06599.1, exon 2 of 6)	418	AT4G06599.1	826068	At.23843	NM_178989		AT4G06599	-	ubiquitin family protein	protein-coding
merged_clf_H3K9_q_0.05_with_ctrl.peaks_peak_7542	2	17543126	17543969	+	257	NA	intron (AT2G42040.1, intron 1 of 3)	intron (AT2G42040.1, intron 1 of 3)	542	AT2G42040.1	818804	At.22354	NM_129767		AT2G42040	T6D20.7|T6D20_7	WRC protein	protein-coding
merged_clf_H3K9_q_0.05_with_ctrl.peaks_peak_19367	5	26848776	26849741	+	257	NA	exon (AT5G67290.1, exon 1 of 2)	exon (AT5G67290.1, exon 1 of 2)	782	AT5G67290.1	836864	At.43255	NM_126129		AT5G67290	K8K14.1|K8K14_1	FAD-dependent oxidoreductase family protein	protein-coding
merged_clf_H3K9_q_0.05_with_ctrl.peaks_peak_13411	4	12138177	12139464	+	257	NA	exon (AT4G23180.3, exon 1 of 5)	exon (AT4G23180.3, exon 1 of 5)	683	AT4G23180.2	828417	At.19078	NM_118447		CRK10	F21P8.70|F21P8_70|RLK4|cysteine-rich RLK (RECEPTOR-like protein kinase) 10	cysteine-rich RLK (RECEPTOR-like protein kinase) 10	protein-coding
merged_clf_H3K9_q_0.05_with_ctrl.peaks_peak_9578	3	6484159	6485053	+	257	NA	promoter-TSS (AT3G18815.1)	promoter-TSS (AT3G18815.1)	538	AT3G18820.1	821415	At.24625	NM_112768		RAB7B	ATRAB7B|ATRABG3F|RAB GTPase homolog G3F|RAB71|RABG3F	RAB GTPase homolog G3F	protein-coding
merged_clf_H3K9_q_0.05_with_ctrl.peaks_peak_4660	1	28458789	28460379	+	257	NA	exon (AT1G75800.1, exon 2 of 3)	exon (AT1G75800.1, exon 2 of 3)	893	AT1G75800.1	843913	At.20871	NM_106230		AT1G75800	T4O12.3|T4O12_3	Pathogenesis-related thaumatin superfamily protein	protein-coding
merged_clf_H3K9_q_0.05_with_ctrl.peaks_peak_13803	4	13916341	13917405	+	257	NA	intron (AT4G27960.1, intron 2 of 4)	intron (AT4G27960.1, intron 2 of 4)	627	AT4G27960.2	828909	At.24357	NM_118934		UBC9	T13J8.70|T13J8_70|UBIQUITIN-PROTEIN LIGASE|ubiquitin conjugating enzyme 9	ubiquitin conjugating enzyme 9	protein-coding
merged_clf_H3K9_q_0.05_with_ctrl.peaks_peak_14011	4	14858665	14859449	+	257	NA	exon (AT4G30370.1, exon 1 of 1)	exon (AT4G30370.1, exon 1 of 1)	446	AT4G30370.1	829160	At.31839	NM_119183		AT4G30370	F17I23.290|F17I23_290|IDF1|IRT1 DEGRADATION FACTOR 1	RING/U-box superfamily protein	protein-coding
merged_clf_H3K9_q_0.05_with_ctrl.peaks_peak_6023	2	9657481	9658396	+	257	NA	exon (AT2G22720.2, exon 2 of 9)	exon (AT2G22720.2, exon 2 of 9)	451	AT2G22720.1	816802	At.21735	NM_127837		AT2G22720	T9I22.16|T9I22_16	SPT2 chromatin protein	protein-coding
merged_clf_H3K9_q_0.05_with_ctrl.peaks_peak_12533	4	7287822	7288531	+	257	NA	TTS (AT4G12230.1)	TTS (AT4G12230.1)	373	AT4G12240.1	826832	At.48849	NM_117294		AT4G12240	T4C9.80|T4C9_80	zinc finger (C2H2 type) family protein	protein-coding
merged_clf_H3K9_q_0.05_with_ctrl.peaks_peak_6010	2	9563274	9564705	+	257	NA	exon (AT2G22500.1, exon 1 of 1)	exon (AT2G22500.1, exon 1 of 1)	861	AT2G22500.1	816783	At.20524	NM_127816		UCP5	ATPUMP5|DIC1|DICARBOXYLATE CARRIER 1|F14M13.10|F14M13_10|PLANT UNCOUPLING MITOCHONDRIAL PROTEIN 5|uncoupling protein 5	uncoupling protein 5	protein-coding
merged_clf_H3K9_q_0.05_with_ctrl.peaks_peak_8014	2	19446852	19447480	+	257	NA	promoter-TSS (AT2G47410.2)	promoter-TSS (AT2G47410.2)	436	AT2G47400.1	819353	At.20118	NM_130308		CP12-1	CP12|CP12 DOMAIN-CONTAINING PROTEIN 1|CP12 domain-containing protein 1|T8I13.24	CP12 domain-containing protein 1	protein-coding
merged_clf_H3K9_q_0.05_with_ctrl.peaks_peak_9983	3	8910769	8911554	+	257	NA	exon (AT3G24490.1, exon 1 of 1)	exon (AT3G24490.1, exon 1 of 1)	739	AT3G24490.1	822039	At.37516	NM_113356		AT3G24490	-	Alcohol dehydrogenase transcription factor Myb/SANT-like family protein	protein-coding
merged_clf_H3K9_q_0.05_with_ctrl.peaks_peak_12526	4	7239236	7240029	+	256	NA	exon (AT4G12080.1, exon 1 of 5)	exon (AT4G12080.1, exon 1 of 5)	432	AT4G12080.1	826816	At.28340	NM_117278		AHL1	AT-hook motif nuclear-localized protein 1|ATAHL1|F16J13.150|F16J13_150	AT-hook motif nuclear-localized protein 1	protein-coding
merged_clf_H3K9_q_0.05_with_ctrl.peaks_peak_7901	2	18979503	18980599	+	256	NA	promoter-TSS (AT2G46200.3)	promoter-TSS (AT2G46200.3)	652	AT2G46220.1	819229	At.23006	NM_130184		AT2G46220	T3F17.13	DUF2358 family protein (DUF2358)	protein-coding
merged_clf_H3K9_q_0.05_with_ctrl.peaks_peak_13746	4	13707966	13709075	+	256	NA	exon (AT4G27410.2, exon 2 of 3)	exon (AT4G27410.2, exon 2 of 3)	341	AT4G27410.1	828849	At.20412	NM_118875		RD26	ANAC072|Arabidopsis NAC domain containing protein 72|AtRD26|F27G19.10|F27G19_10|RESPONSIVE TO DESICCATION 26	NAC (No Apical Meristem) domain transcriptional regulator superfamily protein	protein-coding
merged_clf_H3K9_q_0.05_with_ctrl.peaks_peak_13988	4	14796796	14798179	+	256	NA	exon (AT4G30210.3, exon 3 of 17)	exon (AT4G30210.3, exon 3 of 17)	723	AT4G30210.1	829144	At.145	NM_119167		ATR2	AR2|F9N11.60|F9N11_60|P450 reductase 2	P450 reductase 2	protein-coding
merged_clf_H3K9_q_0.05_with_ctrl.peaks_peak_9314	3	5243555	5245103	+	256	NA	exon (AT3G15510.1, exon 2 of 3)	exon (AT3G15510.1, exon 2 of 3)	897	AT3G15510.1	820790	At.10489	NM_112419		NAC2	ANAC056|ATNAC2|Arabidopsis NAC domain containing protein 56|NAC domain containing protein 2|NAC domain containing protein 2|NAC-REGULATED SEED MORPHOLOGY 1|NARS1	NAC domain containing protein 2	protein-coding
merged_clf_H3K9_q_0.05_with_ctrl.peaks_peak_18191	5	21817397	21818600	+	256	NA	exon (AT5G53750.1, exon 2 of 2)	exon (AT5G53750.1, exon 2 of 2)	870	AT5G53750.1	835456	At.29535	NM_124754		AT5G53750	MGN6.11|MGN6_11	CBS domain-containing protein	protein-coding
merged_clf_H3K9_q_0.05_with_ctrl.peaks_peak_17885	5	20051862	20052827	+	256	NA	exon (AT5G49450.1, exon 1 of 1)	exon (AT5G49450.1, exon 1 of 1)	515	AT5G49450.1	835005	At.26573	NM_124322		bZIP1	AtbZIP1|K7J8.13|K7J8_13|basic leucine-zipper 1	basic leucine-zipper 1	protein-coding
merged_clf_H3K9_q_0.05_with_ctrl.peaks_peak_14587	4	17343470	17344679	+	256	NA	exon (AT4G36810.1, exon 1 of 1)	exon (AT4G36810.1, exon 1 of 1)	700	AT4G36810.1	829834	At.304	NM_119845		GGPS1	AtGGPPS11|AtLSU|GGPPS11|LSU|Large subunit of Heterodimeric geranyl(geranyl)diphosphate synthase|geranyl(geranyl)diphosphate synthase 11|geranylgeranyl pyrophosphate synthase 1	geranylgeranyl pyrophosphate synthase 1	protein-coding
merged_clf_H3K9_q_0.05_with_ctrl.peaks_peak_12169	4	1558031	1559412	+	256	NA	exon (AT4G03510.3, exon 1 of 1)	exon (AT4G03510.3, exon 1 of 1)	691	AT4G03510.3	825654	At.239	NM_116589		RMA1	ATRMA1|F9H3.14|F9H3_14|RING membrane-anchor 1	RING membrane-anchor 1	protein-coding
merged_clf_H3K9_q_0.05_with_ctrl.peaks_peak_19317	5	26615858	26616889	+	256	NA	exon (AT5G66675.4, exon 2 of 3)	exon (AT5G66675.4, exon 2 of 3)	651	AT5G66675.3	836800	At.25386	NM_180598		AT5G66675	-	transmembrane protein, putative (DUF677)	protein-coding
merged_clf_H3K9_q_0.05_with_ctrl.peaks_peak_3479	1	22409641	22410285	+	256	NA	intron (AT1G60870.1, intron 1 of 1)	intron (AT1G60870.1, intron 1 of 1)	665	AT1G60870.1	842379	At.36576	NM_104768		MEE9	T7P1.2|T7P1_2|maternal effect embryo arrest 9	maternal effect embryo arrest 9	protein-coding
merged_clf_H3K9_q_0.05_with_ctrl.peaks_peak_7491	2	17301710	17302213	+	255	NA	exon (AT2G41490.1, exon 1 of 11)	exon (AT2G41490.1, exon 1 of 11)	389	AT2G41490.1	818747	At.12395	NM_129712		GPT	T26J13.8|T26J13_8|UDP-glcnac-adolichol phosphate glcnac-1-p-transferase	UDP-glcnac-adolichol phosphate glcnac-1-p-transferase	protein-coding
merged_clf_H3K9_q_0.05_with_ctrl.peaks_peak_14132	4	15383196	15384812	+	255	NA	exon (AT4G31800.1, exon 3 of 5)	exon (AT4G31800.1, exon 3 of 5)	371	AT4G31800.2	829308	At.19031	NM_119329		WRKY18	ARABIDOPSIS THALIANA WRKY DNA-BINDING PROTEIN 18|ATWRKY18|F11C18.16|WRKY DNA-binding protein 18	WRKY DNA-binding protein 18	protein-coding
merged_clf_H3K9_q_0.05_with_ctrl.peaks_peak_4023	1	25651529	25652860	+	255	NA	exon (AT1G68410.3, exon 2 of 10)	exon (AT1G68410.3, exon 2 of 10)	808	AT1G68410.1	843170	At.26552	NM_105512		AT1G68410	T2E12.9|T2E12_9	Protein phosphatase 2C family protein	protein-coding
merged_clf_H3K9_q_0.05_with_ctrl.peaks_peak_13456	4	12376315	12377672	+	255	NA	exon (AT4G23750.2, exon 2 of 2)	exon (AT4G23750.2, exon 2 of 2)	799	AT4G23750.2	828475	At.26323	NM_118506		CRF2	F9D16.220|F9D16_220|TARGET OF MONOPTEROS 3|TMO3|cytokinin response factor 2	cytokinin response factor 2	protein-coding
merged_clf_H3K9_q_0.05_with_ctrl.peaks_peak_12878	4	9301066	9301950	+	255	NA	exon (AT4G16500.2, exon 1 of 2)	exon (AT4G16500.2, exon 1 of 2)	514	AT4G16500.2	827348	At.33073	NM_001341104		AT4G16500	AtCYS4|CYS4|DL4275C|FCAALL.171|phytocystatin 4	Cystatin/monellin superfamily protein	protein-coding
merged_clf_H3K9_q_0.05_with_ctrl.peaks_peak_12534	4	7289884	7290899	+	255	NA	exon (AT4G12250.1, exon 1 of 1)	exon (AT4G12250.1, exon 1 of 1)	729	AT4G12250.1	826833	At.48849	NM_117295		GAE5	T4C9.90|T4C9_90|UDP-D-glucuronate 4-epimerase 5	UDP-D-glucuronate 4-epimerase 5	protein-coding
merged_clf_H3K9_q_0.05_with_ctrl.peaks_peak_7219	2	16041549	16042300	+	255	NA	exon (AT2G38290.2, exon 1 of 4)	exon (AT2G38290.2, exon 1 of 4)	459	AT2G38290.2	818409	At.11996	NM_129385		AMT2	AMMONIUM TRANSPORTER 2|AMMONIUM TRANSPORTER 2;1|AMT2;1|ATAMT2|F16M14.22|F16M14_22|ammonium transporter 2	ammonium transporter 2	protein-coding
merged_clf_H3K9_q_0.05_with_ctrl.peaks_peak_15645	5	3267661	3268573	+	255	NA	TTS (AT5G10370.1)	TTS (AT5G10370.1)	482	AT5G10380.1	830902	At.1824	NM_121076		RING1	ATRING1|F12B17.270|F12B17_270	RING/U-box superfamily protein	protein-coding
merged_clf_H3K9_q_0.05_with_ctrl.peaks_peak_7950	2	19139164	19140700	+	255	NA	exon (AT2G46620.1, exon 1 of 1)	exon (AT2G46620.1, exon 1 of 1)	917	AT2G46620.1	819274	At.19721	NM_130227		AT2G46620	F13A10.15	P-loop containing nucleoside triphosphate hydrolases superfamily protein	protein-coding
merged_clf_H3K9_q_0.05_with_ctrl.peaks_peak_5143	2	77971	78684	+	255	NA	TTS (AT2G01070.1)	TTS (AT2G01070.1)	439	AT2G01080.1	814636	At.14053	NM_126170		AT2G01080	F23H14.5|F23H14_5	Late embryogenesis abundant (LEA) hydroxyproline-rich glycoprotein family	protein-coding
merged_clf_H3K9_q_0.05_with_ctrl.peaks_peak_19355	5	26809113	26809840	+	255	NA	exon (AT5G67190.1, exon 1 of 1)	exon (AT5G67190.1, exon 1 of 1)	640	AT5G67190.1	836854	At.50633	NM_126119		DEAR2	DREB and EAR motif protein 2|K21H1.15|K21H1_15	DREB and EAR motif protein 2	protein-coding
merged_clf_H3K9_q_0.05_with_ctrl.peaks_peak_15771	5	3784276	3785423	+	255	NA	exon (AT5G11740.1, exon 1 of 1)	exon (AT5G11740.1, exon 1 of 1)	919	AT5G11740.1	831046	At.5118	NM_121212		AGP15	ARABINOGALACTAN PROTEIN 15|ATAGP15|T22P22.130|T22P22_130|arabinogalactan protein 15	arabinogalactan protein 15	protein-coding
merged_clf_H3K9_q_0.05_with_ctrl.peaks_peak_16837	5	9409013	9410027	+	255	NA	intron (AT5G26770.3, intron 2 of 5)	intron (AT5G26770.3, intron 2 of 5)	589	AT5G26770.6	832735	At.30845	NM_122559		AT5G26770	F2P16.30|F2P16_30	myosin heavy chain, cardiac protein	protein-coding
merged_clf_H3K9_q_0.05_with_ctrl.peaks_peak_7034	2	15090711	15092310	+	255	NA	exon (AT2G35940.1, exon 3 of 6)	exon (AT2G35940.1, exon 3 of 6)	668	AT2G35940.2	818167	At.23033	NM_129153		BLH1	BEL1-like homeodomain 1|EDA29|F11F19.15|F11F19_15|embryo sac development arrest 29	BEL1-like homeodomain 1	protein-coding
merged_clf_H3K9_q_0.05_with_ctrl.peaks_peak_3194	1	20430829	20431713	+	255	NA	exon (AT1G54740.1, exon 1 of 1)	exon (AT1G54740.1, exon 1 of 1)	502	AT1G54740.1	841915	At.37173	NM_104350		AT1G54740	T22H22.16|T22H22_16	FANTASTIC four-like protein (DUF3049)	protein-coding
merged_clf_H3K9_q_0.05_with_ctrl.peaks_peak_3646	1	23371538	23372156	+	254	NA	Intergenic	Intergenic	-3431	AT1G63030.1	842606	At.49508	NM_104981		ddf2	DWARF AND DELAYED FLOWERING 2|F16P17.20|F16P17_20	Integrase-type DNA-binding superfamily protein	protein-coding
merged_clf_H3K9_q_0.05_with_ctrl.peaks_peak_10521	3	17066112	17066527	+	254	NA	Intergenic	Intergenic	5364	AT3G46390.1	823789	At.53792	NM_114506		AT3G46390	-	NAC domain protein	protein-coding
merged_clf_H3K9_q_0.05_with_ctrl.peaks_peak_4359	1	27259234	27260264	+	254	NA	intron (AT1G72416.5, intron 1 of 3)	intron (AT1G72416.5, intron 1 of 3)	542	AT1G72416.5	3767688	At.47738	NM_001036191		AT1G72416	-	Chaperone DnaJ-domain superfamily protein	protein-coding
merged_clf_H3K9_q_0.05_with_ctrl.peaks_peak_14388	4	16482953	16483931	+	254	NA	exon (AT4G34480.3, exon 2 of 5)	exon (AT4G34480.3, exon 2 of 5)	592	AT4G34480.3	829599	At.48072	NM_119613		AT4G34480	T4L20.60|T4L20_60	O-Glycosyl hydrolases family 17 protein	protein-coding
merged_clf_H3K9_q_0.05_with_ctrl.peaks_peak_13095	4	10348205	10349642	+	254	NA	exon (AT4G18880.1, exon 1 of 2)	exon (AT4G18880.1, exon 1 of 2)	979	AT4G18880.1	827622	At.1951	NM_118004		HSF A4A	ARABIDOPSIS THALIANA HEAT SHOCK TRANSCRIPTION FACTOR A4A|ARABIDOPSIS THALIANA HEAT SHOCK TRANSCRIPTION FACTOR A4A|AT-HSFA4A|F13C5.50|F13C5_50|heat shock transcription factor A4A|heat shock transcription factor A4A	heat shock transcription factor A4A	protein-coding
merged_clf_H3K9_q_0.05_with_ctrl.peaks_peak_4693	1	28586563	28587713	+	254	NA	promoter-TSS (AT1G76170.4)	promoter-TSS (AT1G76170.4)	-720	AT1G76170.4	843949	At.50040	NM_106266		AT1G76170	T23E18.11|T23E18_11	2-thiocytidine tRNA biosynthesis protein, TtcA	protein-coding
merged_clf_H3K9_q_0.05_with_ctrl.peaks_peak_9147	3	4495150	4495824	+	254	NA	exon (AT3G13720.1, exon 1 of 1)	exon (AT3G13720.1, exon 1 of 1)	1313	AT3G13720.1	820581	At.23301	NM_112222		PRA8	PRA1.F3|PRENYLATED RAB ACCEPTOR 1.F3	PRA1 (Prenylated rab acceptor) family protein	protein-coding
merged_clf_H3K9_q_0.05_with_ctrl.peaks_peak_2640	1	16230576	16231172	+	254	NA	promoter-TSS (AT1G43130.3)	promoter-TSS (AT1G43130.3)	-44	AT1G43130.3	840912	At.39020	NM_103466		LCV2	F1I21.3|F1I21_3|like COV 2	like COV 2	protein-coding
merged_clf_H3K9_q_0.05_with_ctrl.peaks_peak_11097	3	19976336	19977302	+	254	NA	exon (AT3G53950.1, exon 1 of 1)	exon (AT3G53950.1, exon 1 of 1)	1480	AT3G53950.1	824562	At.1408	NM_115255		AT3G53950	-	glyoxal oxidase-related protein	protein-coding
merged_clf_H3K9_q_0.05_with_ctrl.peaks_peak_19102	5	25842123	25843434	+	254	NA	exon (AT5G64660.1, exon 1 of 1)	exon (AT5G64660.1, exon 1 of 1)	777	AT5G64660.1	836587	At.19743	NM_125862		CMPG2	''CYS|ATCMPG2|CYS|MET|MUB3.18|MUB3_18|PRO|and GLY protein 2|and GLY protein 2''	CYS, MET, PRO, and GLY protein 2	protein-coding
merged_clf_H3K9_q_0.05_with_ctrl.peaks_peak_14421	4	16635674	16636320	+	254	NA	TTS (AT4G34910.1)	TTS (AT4G34910.1)	493	AT4G34920.1	829644	At.3507	NM_119658		AT4G34920	F11I11.160|F11I11_160	PLC-like phosphodiesterases superfamily protein	protein-coding
merged_clf_H3K9_q_0.05_with_ctrl.peaks_peak_2468	1	11931285	11932399	+	254	NA	TTS (AT1G32930.1)	TTS (AT1G32930.1)	693	AT1G32928.1	3766886	At.49476	NM_001036055		AT1G32928	-	Avr9/Cf-9 rapidly elicited protein	protein-coding
merged_clf_H3K9_q_0.05_with_ctrl.peaks_peak_18342	5	22580350	22581220	+	254	NA	promoter-TSS (AT5G55800.1)	promoter-TSS (AT5G55800.1)	550	AT5G55790.3	835673	At.50912	NM_124961		AT5G55790	MDF20.23|MDF20_23	hypothetical protein	protein-coding
merged_clf_H3K9_q_0.05_with_ctrl.peaks_peak_7393	2	16823153	16824492	+	254	NA	intron (AT2G40270.1, intron 2 of 5)	intron (AT2G40270.1, intron 2 of 5)	639	AT2G40270.2	818619	At.43577	NM_129585		AT2G40270	T7M7.19	Protein kinase family protein	protein-coding
merged_clf_H3K9_q_0.05_with_ctrl.peaks_peak_16554	5	7541238	7542193	+	254	NA	promoter-TSS (AT5G22680.1)	promoter-TSS (AT5G22680.1)	473	AT5G22690.4	832332	At.31047	NM_122175		AT5G22690	MDJ22.11|MDJ22_11	Disease resistance protein (TIR-NBS-LRR class) family	protein-coding
merged_clf_H3K9_q_0.05_with_ctrl.peaks_peak_4719	1	28715183	28716441	+	254	NA	exon (AT1G76520.2, exon 3 of 9)	exon (AT1G76520.2, exon 3 of 9)	1047	AT1G76520.2	843985	At.25397	NM_106302		AT1G76520	F14G6.12|F14G6_12|PILS3|PIN-LIKES 3	Auxin efflux carrier family protein	protein-coding
merged_clf_H3K9_q_0.05_with_ctrl.peaks_peak_1140	1	5047963	5048476	+	254	NA	exon (AT1G14687.1, exon 1 of 1)	exon (AT1G14687.1, exon 1 of 1)	437	AT1G14687.1	838033	At.74098	NM_101337		HB32	AtHB32|ZHD14|ZINC FINGER HOMEODOMAIN 14|homeobox protein 32	homeobox protein 32	protein-coding
merged_clf_H3K9_q_0.05_with_ctrl.peaks_peak_9879	3	8180714	8181774	+	254	NA	exon (AT3G23030.2, exon 2 of 2)	exon (AT3G23030.2, exon 2 of 2)	609	AT3G23030.1	821877	At.23539	NM_113203		IAA2	indole-3-acetic acid inducible 2	indole-3-acetic acid inducible 2	protein-coding
merged_clf_H3K9_q_0.05_with_ctrl.peaks_peak_833	1	3756359	3756970	+	254	NA	exon (AT1G11210.1, exon 1 of 2)	exon (AT1G11210.1, exon 1 of 2)	334	AT1G11210.1	837662	At.11566	NM_100993		AT1G11210	-	cotton fiber protein, putative (DUF761)	protein-coding
merged_clf_H3K9_q_0.05_with_ctrl.peaks_peak_7929	2	19088032	19088947	+	254	NA	TTS (AT2G46505.1)	TTS (AT2G46505.1)	538	AT2G46500.3	819260	At.27467	NM_130214		PI4K GAMMA 4	ATPI4K GAMMA 4|F11C10.19|F11C10_19|UBDK GAMMA 4|UBIQUITIN-LIKE DOMAIN KINASE GAMMA 4|phosphoinositide 4-kinase gamma 4	phosphoinositide 4-kinase gamma 4	protein-coding
merged_clf_H3K9_q_0.05_with_ctrl.peaks_peak_5358	2	1503099	1503742	+	254	NA	exon (AT2G04305.1, exon 2 of 5)	exon (AT2G04305.1, exon 2 of 5)	407	AT2G04305.1	814969	At.41327	NM_126463		AT2G04305	T23O15.7|T23O15_7	Magnesium transporter CorA-like family protein	protein-coding
merged_clf_H3K9_q_0.05_with_ctrl.peaks_peak_8660	3	2419567	2420213	+	254	NA	TTS (AT3G07580.2)	TTS (AT3G07580.2)	441	AT3G07570.1	819948	At.27235	NM_111636		AT3G07570	-	Cytochrome b561/ferric reductase transmembrane with DOMON related domain-containing protein	protein-coding
merged_clf_H3K9_q_0.05_with_ctrl.peaks_peak_2210	1	10248130	10249518	+	254	NA	exon (AT1G29300.1, exon 1 of 1)	exon (AT1G29300.1, exon 1 of 1)	880	AT1G29300.1	839804	At.40767	NM_102670		UNE1	F28N24.3|F28N24_3|unfertilized embryo sac 1	intracellular protein transporter, putative (DUF641)	protein-coding
merged_clf_H3K9_q_0.05_with_ctrl.peaks_peak_6848	2	14217350	14218365	+	253	NA	exon (AT2G33570.1, exon 1 of 2)	exon (AT2G33570.1, exon 1 of 2)	1086	AT2G33570.1	817922	At.12133	NM_128917		GALS1	F4P9.34|F4P9_34|galactan synthase 1	glycosyltransferase family protein (DUF23)	protein-coding
merged_clf_H3K9_q_0.05_with_ctrl.peaks_peak_3699	1	23705152	23706009	+	253	NA	exon (AT1G63860.4, exon 1 of 6)	exon (AT1G63860.4, exon 1 of 6)	425	AT1G63860.2	3767624	At.47650	NM_001160971		AT1G63860	T12P18.12	Disease resistance protein (TIR-NBS-LRR class) family	protein-coding
merged_clf_H3K9_q_0.05_with_ctrl.peaks_peak_19115	5	25891511	25892424	+	253	NA	exon (AT5G64750.1, exon 1 of 2)	exon (AT5G64750.1, exon 1 of 2)	518	AT5G64750.1	836596	At.27199	NM_125871		ABR1	ABA REPRESSOR1|MVP7.8|MVP7_8	Integrase-type DNA-binding superfamily protein	protein-coding
merged_clf_H3K9_q_0.05_with_ctrl.peaks_peak_11498	3	21832338	21832941	+	253	NA	exon (AT3G59068.1, exon 1 of 1)	exon (AT3G59068.1, exon 1 of 1)	447	AT3G59068.1	28719415		NR_141702		AT3G59068	-	ncRNA	ncRNA
merged_clf_H3K9_q_0.05_with_ctrl.peaks_peak_9828	3	7906856	7907962	+	253	NA	exon (AT3G22370.1, exon 2 of 4)	exon (AT3G22370.1, exon 2 of 4)	888	AT3G22370.1	821806	At.23475	NM_113135		AOX1A	ATAOX1A|AtHSR3|HSR3|alternative oxidase 1A|hyper-sensitivity-related 3	alternative oxidase 1A	protein-coding
merged_clf_H3K9_q_0.05_with_ctrl.peaks_peak_4943	1	29665190	29665730	+	253	NA	TTS (AT1G78900.1)	TTS (AT1G78900.1)	294	AT1G78910.2	844229	At.45151	NM_106540		AT1G78910	F9K20.4|F9K20_4	Pseudouridine synthase family protein	protein-coding
merged_clf_H3K9_q_0.05_with_ctrl.peaks_peak_7211	2	16011647	16012380	+	253	NA	TTS (AT2G38240.1)	TTS (AT2G38240.1)	780	AT2G38230.1	818402	At.48565	NM_129380		PDX1.1	ARABIDOPSIS THALIANA PYRIDOXINE BIOSYNTHESIS 1.1|ATPDX1.1|F16M14.16|F16M14_16|pyridoxine biosynthesis 1.1	pyridoxine biosynthesis 1.1	protein-coding
merged_clf_H3K9_q_0.05_with_ctrl.peaks_peak_17460	5	17585852	17586997	+	253	NA	exon (AT5G43760.1, exon 1 of 2)	exon (AT5G43760.1, exon 1 of 2)	901	AT5G43760.1	834398	At.9037	NM_123743		KCS20	3-ketoacyl-CoA synthase 20|MQD19.11|MQD19_11	3-ketoacyl-CoA synthase 20	protein-coding
merged_clf_H3K9_q_0.05_with_ctrl.peaks_peak_508	1	2223807	2224513	+	253	NA	exon (AT1G07240.1, exon 1 of 1)	exon (AT1G07240.1, exon 1 of 1)	535	AT1G07240.1	837235	At.17148	NM_100598		UGT71C5	F10K1.5|F10K1_5|UDP-glucosyl transferase 71C5	UDP-glucosyl transferase 71C5	protein-coding
merged_clf_H3K9_q_0.05_with_ctrl.peaks_peak_11185	3	20399539	20400276	+	253	NA	TTS (AT3G55050.1)	TTS (AT3G55050.1)	439	AT3G55040.1	824670	At.20918	NM_115362		GSTL2	glutathione transferase lambda 2	glutathione transferase lambda 2	protein-coding
merged_clf_H3K9_q_0.05_with_ctrl.peaks_peak_4771	1	28952557	28953440	+	253	NA	intron (AT1G77060.1, intron 2 of 5)	intron (AT1G77060.1, intron 2 of 5)	582	AT1G77060.1	844041	At.34553	NM_106356		AT1G77060	F22K20.14|F22K20_14	Phosphoenolpyruvate carboxylase family protein	protein-coding
merged_clf_H3K9_q_0.05_with_ctrl.peaks_peak_15968	5	4695736	4696826	+	253	NA	TTS (AT5G14580.1)	TTS (AT5G14580.1)	797	AT5G14570.1	831308	At.5082	NM_121461		NRT2.7	ATNRT2.7|T15N1.60|T15N1_60|high affinity nitrate transporter 2.7	high affinity nitrate transporter 2.7	protein-coding
merged_clf_H3K9_q_0.05_with_ctrl.peaks_peak_837	1	3774563	3775195	+	253	NA	Intergenic	Intergenic	-2357	AT1G11260.1	837667	At.24793	NM_100998		STP1	ATSTP1|SUGAR TRANSPORTER 1|T28P6.9|T28P6_9|sugar transporter 1	sugar transporter 1	protein-coding
merged_clf_H3K9_q_0.05_with_ctrl.peaks_peak_12740	4	8519646	8520403	+	253	NA	promoter-TSS (AT4G14890.1)	promoter-TSS (AT4G14890.1)	439	AT4G14880.2	827145	At.30	NM_117574		OASA1	ATCYS-3A|CYTACS1|DL3480C|FCAALL.34|O-ACETHYLSERINE SULFHYDRYLASE|O-ACETYLSERINE (THIOL)LYASE|O-acetylserine (thiol) lyase (OAS-TL) isoform A1|OLD3|ONSET OF LEAF DEATH 3	O-acetylserine (thiol) lyase (OAS-TL)	protein-coding
merged_clf_H3K9_q_0.05_with_ctrl.peaks_peak_1151	1	5090249	5091572	+	253	NA	exon (AT1G14780.1, exon 1 of 7)	exon (AT1G14780.1, exon 1 of 7)	101	AT1G14780.1	838043	At.70434	NM_101347		AT1G14780	F10B6.18|F10B6_18	MAC/Perforin domain-containing protein	protein-coding
merged_clf_H3K9_q_0.05_with_ctrl.peaks_peak_13992	4	14819304	14820452	+	253	NA	promoter-TSS (AT4G30260.2)	promoter-TSS (AT4G30260.2)	717	AT4G30270.1	829150	At.20967	NM_119173		XTH24	F9N11.120|F9N11_120|MERI-5|MERI5B|MERISTEM 5|SEN4|SENESCENCE 4|meristem-5|xyloglucan endotransglucosylase/hydrolase 24	xyloglucan endotransglucosylase/hydrolase 24	protein-coding
merged_clf_H3K9_q_0.05_with_ctrl.peaks_peak_15434	5	2265899	2266890	+	253	NA	exon (AT5G07220.1, exon 2 of 4)	exon (AT5G07220.1, exon 2 of 4)	618	AT5G07220.1	830613	At.20033	NM_120804		BAG3	ATBAG3|BCL-2-associated athanogene 3|T28J14.160|T28J14_160	BCL-2-associated athanogene 3	protein-coding
merged_clf_H3K9_q_0.05_with_ctrl.peaks_peak_6228	2	10830107	10831549	+	253	NA	exon (AT2G25450.1, exon 2 of 3)	exon (AT2G25450.1, exon 2 of 3)	827	AT2G25450.1	817083	At.47589	NM_128102		AT2G25450	F13B15.11|F13B15_11	2-oxoglutarate (2OG) and Fe(II)-dependent oxygenase superfamily protein	protein-coding
merged_clf_H3K9_q_0.05_with_ctrl.peaks_peak_13155	4	10646173	10647161	+	253	NA	exon (AT4G19520.3, exon 1 of 8)	exon (AT4G19520.3, exon 1 of 8)	412	AT4G19520.3	827694	At.2018	NM_118072		AT4G19520	F24J7.80|F24J7_80	disease resistance protein (TIR-NBS-LRR class) family	protein-coding
merged_clf_H3K9_q_0.05_with_ctrl.peaks_peak_291	1	1198141	1199119	+	253	NA	exon (AT1G04430.3, exon 1 of 8)	exon (AT1G04430.3, exon 1 of 8)	327	AT1G04430.2	839522	At.19913	NM_100323		AT1G04430	F19P19.11|F19P19_11	S-adenosyl-L-methionine-dependent methyltransferases superfamily protein	protein-coding
merged_clf_H3K9_q_0.05_with_ctrl.peaks_peak_8542	3	1936211	1937318	+	253	NA	exon (AT3G06380.2, exon 1 of 4)	exon (AT3G06380.2, exon 1 of 4)	691	AT3G06380.1	819812	At.46725	NM_111513		TLP9	ATTLP9|F24P17.15|F24P17_15|tubby-like protein 9	tubby-like protein 9	protein-coding
merged_clf_H3K9_q_0.05_with_ctrl.peaks_peak_9585	3	6524106	6525401	+	253	NA	TTS (AT3G18915.1)	TTS (AT3G18915.1)	702	AT3G18915.1	28719286		NM_001338370		AT3G18915	-	transmembrane protein	protein-coding
merged_clf_H3K9_q_0.05_with_ctrl.peaks_peak_16753	5	8724000	8724886	+	253	NA	intron (AT5G25210.2, intron 1 of 3)	intron (AT5G25210.2, intron 1 of 3)	500	AT5G25210.2	832592	At.43982	NM_122430		AT5G25210	F21J6.105|F21J6_105	hypothetical protein	protein-coding
merged_clf_H3K9_q_0.05_with_ctrl.peaks_peak_14791	4	18114501	18115119	+	253	NA	TTS (AT4G38810.1)	TTS (AT4G38810.1)	366	AT4G38800.1	830035	At.2827	NM_120040		MTN1	ARABIDOPSIS METHYLTHIOADENOSINE NUCLEOSIDASE 1|ATMTAN1|ATMTN1|METHYLTHIOADENOSINE NUCLEOSIDASE 1|MTAN1|T9A14.80|T9A14_80|methylthioadenosine nucleosidase 1	methylthioadenosine nucleosidase 1	protein-coding
merged_clf_H3K9_q_0.05_with_ctrl.peaks_peak_19387	5	26904517	26905529	+	253	NA	exon (AT5G67420.1, exon 3 of 3)	exon (AT5G67420.1, exon 3 of 3)	1494	AT5G67420.1	836878	At.27456	NM_126142		LBD37	ASL39|ASYMMETRIC LEAVES2-LIKE 39|K8K14.16|K8K14_16|LOB domain-containing protein 37	LOB domain-containing protein 37	protein-coding
merged_clf_H3K9_q_0.05_with_ctrl.peaks_peak_9203	3	4724707	4725502	+	252	NA	intron (AT3G02895.1, intron 1 of 1)	intron (AT3G02895.1, intron 1 of 1)	357	AT3G02895.1	28718611		NR_140952		AT3G02895	-	ncRNA	ncRNA
merged_clf_H3K9_q_0.05_with_ctrl.peaks_peak_10480	3	16790833	16791550	+	252	NA	TTS (AT3G45730.1)	TTS (AT3G45730.1)	430	AT3G45740.2	823716	At.43663	NM_114443		AT3G45740	-	hydrolase family protein / HAD-superfamily protein	protein-coding
merged_clf_H3K9_q_0.05_with_ctrl.peaks_peak_18493	5	23317159	23318087	+	252	NA	TTS (AT5G57590.1)	TTS (AT5G57590.1)	554	AT5G57580.1	835862	At.7485	NM_125139		AT5G57580	MUA2.16|MUA2_16	Calmodulin-binding protein	protein-coding
merged_clf_H3K9_q_0.05_with_ctrl.peaks_peak_6195	2	10610811	10611599	+	252	NA	exon (AT2G24945.1, exon 1 of 1)	exon (AT2G24945.1, exon 1 of 1)	372	AT2G24945.1	817033	At.44381	NM_179729		AT2G24945	-	transmembrane protein	protein-coding
merged_clf_H3K9_q_0.05_with_ctrl.peaks_peak_5582	2	6947305	6947988	+	252	NA	promoter-TSS (ENSRNA049492411-T1)	promoter-TSS (ENSRNA049492411-T1)	550	AT2G15960.1	816091	At.184	NM_127155		AT2G15960	F19G14.4|F19G14_4	stress-induced protein	protein-coding
merged_clf_H3K9_q_0.05_with_ctrl.peaks_peak_5312	2	1047230	1047677	+	252	NA	intron (AT2G03470.1, intron 1 of 2)	intron (AT2G03470.1, intron 1 of 2)	231	AT2G03470.2	814876	At.41390	NM_126398		AT2G03470	T4M8.10|T4M8_10	ELM2 domain-containing protein	protein-coding
merged_clf_H3K9_q_0.05_with_ctrl.peaks_peak_4392	1	27383503	27384386	+	252	NA	promoter-TSS (AT1G72755.1)	promoter-TSS (AT1G72755.1)	-94	AT1G72755.1	31370866		NM_001349580		AT1G72755	-	hypothetical protein	protein-coding
merged_clf_H3K9_q_0.05_with_ctrl.peaks_peak_19353	5	26799763	26800472	+	252	NA	promoter-TSS (AT5G67160.1)	promoter-TSS (AT5G67160.1)	351	AT5G67170.1	836852	At.28821	NM_126117		AT5G67170	K21H1.13|K21H1_13	SEC-C motif-containing protein / OTU-like cysteine protease family protein	protein-coding
merged_clf_H3K9_q_0.05_with_ctrl.peaks_peak_3930	1	25175222	25176267	+	252	NA	exon (AT1G67265.1, exon 1 of 1)	exon (AT1G67265.1, exon 1 of 1)	486	AT1G67265.1	5007837	At.49512	NM_001084313		RTFL21	DEVIL 3|DVL3|ROTUNDIFOLIA like 21	ROTUNDIFOLIA like 21	protein-coding
merged_clf_H3K9_q_0.05_with_ctrl.peaks_peak_4153	1	26326619	26327861	+	252	NA	exon (AT1G69900.1, exon 1 of 2)	exon (AT1G69900.1, exon 1 of 2)	725	AT1G69900.1	843326	At.50019	NM_105658		AT1G69900	T17F3.7|T17F3_7	Actin cross-linking protein	protein-coding
merged_clf_H3K9_q_0.05_with_ctrl.peaks_peak_3294	1	21006898	21007800	+	252	NA	TTS (AT1G56145.2)	TTS (AT1G56145.2)	506	AT1G56140.1	842066	At.42833	NM_104492		AT1G56140	T6H22.26|T6H22_26	Leucine-rich repeat transmembrane protein kinase	protein-coding
merged_clf_H3K9_q_0.05_with_ctrl.peaks_peak_5134	1	30414185	30415101	+	251	NA	promoter-TSS (AT1G80960.1)	promoter-TSS (AT1G80960.1)	-480	AT1G80960.1	844436	At.33867	NM_106744		AT1G80960	F23A5.32|F23A5_32	F-box and Leucine Rich Repeat domains containing protein	protein-coding
merged_clf_H3K9_q_0.05_with_ctrl.peaks_peak_16083	5	5261279	5262548	+	251	NA	exon (AT5G16110.1, exon 2 of 4)	exon (AT5G16110.1, exon 2 of 4)	927	AT5G16110.1	831468	At.24196	NM_121616		AT5G16110	-	hypothetical protein	protein-coding
merged_clf_H3K9_q_0.05_with_ctrl.peaks_peak_4642	1	28366035	28367387	+	251	NA	exon (AT1G75540.1, exon 2 of 3)	exon (AT1G75540.1, exon 2 of 3)	887	AT1G75540.1	843890	At.34761	NM_106207		BBX21	AtBBX21|B BOX 21|B-box domain protein 21|F10A5.24|F10A5_24|LHUS|STH2|long hypocotyl under shade|salt tolerance homolog2	salt tolerance homolog2	protein-coding
merged_clf_H3K9_q_0.05_with_ctrl.peaks_peak_10942	3	19284370	19285158	+	251	NA	promoter-TSS (AT3G51960.3)	promoter-TSS (AT3G51960.3)	164	AT3G08215.1	28719083		NR_141409		AT3G08215	-	ncRNA	ncRNA
merged_clf_H3K9_q_0.05_with_ctrl.peaks_peak_15515	5	2651424	2652395	+	251	NA	intron (AT5G08240.1, intron 1 of 1)	intron (AT5G08240.1, intron 1 of 1)	626	AT5G08240.1	830720	At.32606	NM_120907		AT5G08240	F8L15.11	transmembrane protein	protein-coding
merged_clf_H3K9_q_0.05_with_ctrl.peaks_peak_18918	5	25191872	25192698	+	250	NA	intron (AT5G62720.2, intron 1 of 3)	intron (AT5G62720.2, intron 1 of 3)	425	AT5G62720.2	836393	At.27613	NM_125667		AT5G62720	MQB2.4|MQB2_4	Integral membrane HPP family protein	protein-coding
merged_clf_H3K9_q_0.05_with_ctrl.peaks_peak_12609	4	7760360	7760938	+	250	NA	exon (AT4G13340.1, exon 1 of 1)	exon (AT4G13340.1, exon 1 of 1)	2374	AT4G13340.1	826964	At.48854	NM_117407		LRX3	T9E8.80|T9E8_80|leucine-rich repeat/extensin 3	Leucine-rich repeat (LRR) family protein	protein-coding
merged_clf_H3K9_q_0.05_with_ctrl.peaks_peak_12374	4	6053827	6054351	+	250	NA	exon (AT4G09580.1, exon 1 of 4)	exon (AT4G09580.1, exon 1 of 4)	365	AT4G09580.1	826542	At.43150	NM_117026		AT4G09580	T25P22.20|T25P22_20	SNARE associated Golgi protein family	protein-coding
merged_clf_H3K9_q_0.05_with_ctrl.peaks_peak_1772	1	7882691	7883706	+	250	NA	exon (AT1G22310.1, exon 1 of 3)	exon (AT1G22310.1, exon 1 of 3)	626	AT1G22310.1	838838	At.41609	NM_102082		MBD8	ATMBD8|T16E15.7|T16E15_7|methyl-CPG-binding domain 8	methyl-CPG-binding domain 8	protein-coding
merged_clf_H3K9_q_0.05_with_ctrl.peaks_peak_18723	5	24317277	24317948	+	250	NA	exon (AT5G60460.1, exon 1 of 1)	exon (AT5G60460.1, exon 1 of 1)	323	AT5G60460.2	28721282	At.43597	NM_001345419		AT5G60460	MUF9.9|MUF9_9	Preprotein translocase Sec, Sec61-beta subunit protein	protein-coding
merged_clf_H3K9_q_0.05_with_ctrl.peaks_peak_10883	3	19013445	19014385	+	250	NA	promoter-TSS (AT3G08185.1)	promoter-TSS (AT3G08185.1)	526	AT3G51180.1	824281	At.863	NM_114977		AT3G51180	-	Zinc finger C-x8-C-x5-C-x3-H type family protein	protein-coding
merged_clf_H3K9_q_0.05_with_ctrl.peaks_peak_15844	5	4153796	4154613	+	250	NA	exon (AT5G13090.1, exon 1 of 1)	exon (AT5G13090.1, exon 1 of 1)	526	AT5G13090.1	831148	At.10073	NM_121312		AT5G13090	T19L5.50|T19L5_50	hypothetical protein	protein-coding
merged_clf_H3K9_q_0.05_with_ctrl.peaks_peak_5305	2	1016287	1017013	+	250	NA	exon (AT2G03340.1, exon 1 of 4)	exon (AT2G03340.1, exon 1 of 4)	572	AT2G03340.1	814863	At.23587	NM_126385		WRKY3	T4M8.23|T4M8_23|WRKY DNA-binding protein 3	WRKY DNA-binding protein 3	protein-coding
merged_clf_H3K9_q_0.05_with_ctrl.peaks_peak_18	1	75567	76462	+	250	NA	exon (AT1G01180.1, exon 1 of 1)	exon (AT1G01180.1, exon 1 of 1)	624	AT1G01180.1	839239	At.42663	NM_100000		AT1G01180	F6F3.5	S-adenosyl-L-methionine-dependent methyltransferases superfamily protein	protein-coding
merged_clf_H3K9_q_0.05_with_ctrl.peaks_peak_19411	5	26969849	26970588	+	250	NA	promoter-TSS (AT5G67630.1)	promoter-TSS (AT5G67630.1)	450	AT5G67640.1	836900	At.55726	NM_126164		AT5G67640	K9I9.21|K9I9_21	hypothetical protein	protein-coding
merged_clf_H3K9_q_0.05_with_ctrl.peaks_peak_9590	3	6546282	6547717	+	250	NA	exon (AT3G18980.2, exon 1 of 2)	exon (AT3G18980.2, exon 1 of 2)	762	AT3G18980.2	821431	At.8156	NM_112784		ETP1	EIN2 targeting protein1	EIN2 targeting protein1	protein-coding
merged_clf_H3K9_q_0.05_with_ctrl.peaks_peak_2539	1	12455745	12456548	+	250	NA	exon (AT1G34200.1, exon 1 of 2)	exon (AT1G34200.1, exon 1 of 2)	493	AT1G34200.1	840319	At.28728	NM_103143		AT1G34200	F23M19.12|F23M19_12	Glyceraldehyde-3-phosphate dehydrogenase-like family protein	protein-coding
merged_clf_H3K9_q_0.05_with_ctrl.peaks_peak_15879	5	4338223	4339012	+	250	NA	TTS (AT5G13490.1)	TTS (AT5G13490.1)	255	AT5G13500.2	831194	At.32061	NM_121353		AT5G13500	T6I14.30|T6I14_30	Hyp O-arabinosyltransferase-like protein	protein-coding
merged_clf_H3K9_q_0.05_with_ctrl.peaks_peak_6867	2	14309216	14310345	+	250	NA	exon (AT2G33830.1, exon 3 of 4)	exon (AT2G33830.1, exon 3 of 4)	559	AT2G33830.1	817950	At.25108	NM_179889		AT2G33830	AtDRM2|DRM2|dormancy associated gene 2	Dormancy/auxin associated family protein	protein-coding
merged_clf_H3K9_q_0.05_with_ctrl.peaks_peak_5998	2	9526304	9527771	+	250	NA	intron (AT2G22430.1, intron 2 of 2)	intron (AT2G22430.1, intron 2 of 2)	808	AT2G22430.1	816775	At.25257	NM_127808		HB6	ATHB6|F14M13.17|F14M13_17|homeobox protein 6	homeobox protein 6	protein-coding
merged_clf_H3K9_q_0.05_with_ctrl.peaks_peak_9595	3	6559181	6559839	+	249	NA	promoter-TSS (AT3G19010.4)	promoter-TSS (AT3G19010.4)	-862	AT3G19010.4	821434	At.20707	NM_112787		AT3G19010	-	2-oxoglutarate (2OG) and Fe(II)-dependent oxygenase superfamily protein	protein-coding
merged_clf_H3K9_q_0.05_with_ctrl.peaks_peak_6967	2	14861514	14862069	+	249	NA	TTS (AT2G35300.1)	TTS (AT2G35300.1)	387	AT2G35290.1	818096	At.37685	NM_129081		AT2G35290	SAUR79|SMALL AUXIN UPREGULATED RNA 79|T4C15.4|T4C15_4	hypothetical protein	protein-coding
merged_clf_H3K9_q_0.05_with_ctrl.peaks_peak_13138	4	10575774	10576423	+	249	NA	exon (AT4G19390.1, exon 1 of 5)	exon (AT4G19390.1, exon 1 of 5)	521	AT4G19390.1	827680	At.19094	NM_118059		AT4G19390	T5K18.170|T5K18_170	Uncharacterized protein family (UPF0114)	protein-coding
merged_clf_H3K9_q_0.05_with_ctrl.peaks_peak_8637	3	2347587	2348597	+	249	NA	exon (AT3G07350.1, exon 1 of 1)	exon (AT3G07350.1, exon 1 of 1)	906	AT3G07350.1	819923	At.28250	NM_111614		AT3G07350	-	sulfate/thiosulfate import ATP-binding protein, putative (DUF506)	protein-coding
merged_clf_H3K9_q_0.05_with_ctrl.peaks_peak_15329	5	1746858	1747967	+	249	NA	exon (AT5G05810.1, exon 1 of 1)	exon (AT5G05810.1, exon 1 of 1)	864	AT5G05810.1	830466	At.50435	NM_120663		ATL43	MJJ3.23|MJJ3_23	RING/U-box superfamily protein	protein-coding
merged_clf_H3K9_q_0.05_with_ctrl.peaks_peak_9217	3	4785816	4787123	+	249	NA	promoter-TSS (AT3G02915.1)	promoter-TSS (AT3G02915.1)	78	AT3G02915.1	28718613		NR_140954		AT3G02915	-	ncRNA	ncRNA
merged_clf_H3K9_q_0.05_with_ctrl.peaks_peak_15205	5	1279839	1280825	+	249	NA	intron (AT5G04490.2, intron 1 of 4)	intron (AT5G04490.2, intron 1 of 4)	680	AT5G04490.2	830328	At.33117	NM_120531		VTE5	T32M21.90|T32M21_90|vitamin E pathway gene 5	phytol kinase 1 VTE5	protein-coding
merged_clf_H3K9_q_0.05_with_ctrl.peaks_peak_4887	1	29463955	29465006	+	249	NA	exon (AT1G78310.1, exon 1 of 1)	exon (AT1G78310.1, exon 1 of 1)	769	AT1G78310.1	844166	At.28469	NM_106480		AT1G78310	F3F9.15|F3F9_15|VQ motif-containing protein 9|VQ9	VQ motif-containing protein	protein-coding
merged_clf_H3K9_q_0.05_with_ctrl.peaks_peak_13123	4	10469703	10470488	+	249	NA	promoter-TSS (AT4G19130.2)	promoter-TSS (AT4G19130.2)	431	AT4G19140.1	827652	At.43375	NM_118033		AT4G19140	T18B16.110|T18B16_110	exopolysaccharide production negative regulator	protein-coding
merged_clf_H3K9_q_0.05_with_ctrl.peaks_peak_18525	5	23451264	23452629	+	249	NA	exon (AT5G57910.1, exon 2 of 4)	exon (AT5G57910.1, exon 2 of 4)	918	AT5G57910.2	835902	At.43058	NM_125176		AT5G57910	MTI20.17|MTI20_17	ribosomal RNA small subunit methyltransferase G	protein-coding
merged_clf_H3K9_q_0.05_with_ctrl.peaks_peak_4695	1	28590299	28591317	+	249	NA	intron (AT1G76185.1, intron 1 of 1)	intron (AT1G76185.1, intron 1 of 1)	483	AT1G76185.1	843951	At.34694	NM_106268		AT1G76185	-	NADH-ubiquinone oxidoreductase chain	protein-coding
merged_clf_H3K9_q_0.05_with_ctrl.peaks_peak_203	1	830664	831421	+	249	NA	TTS (AT1G03365.1)	TTS (AT1G03365.1)	492	AT1G03370.2	839519	At.10872	NM_100219		AT1G03370	F15K9.2|F15K9_2	C2 calcium/lipid-binding and GRAM domain containing protein	protein-coding
merged_clf_H3K9_q_0.05_with_ctrl.peaks_peak_12343	4	5740375	5741807	+	249	NA	exon (AT4G08950.1, exon 1 of 1)	exon (AT4G08950.1, exon 1 of 1)	872	AT4G08950.1	826473	At.22399	NM_116964		EXO	EXORDIUM|T3H13.3|T3H13_3	Phosphate-responsive 1 family protein	protein-coding
merged_clf_H3K9_q_0.05_with_ctrl.peaks_peak_10614	3	17559066	17560569	+	249	NA	exon (AT3G47620.1, exon 1 of 1)	exon (AT3G47620.1, exon 1 of 1)	1024	AT3G47620.1	823916	At.21251	NM_114630		TCP14	AtTCP14|TEOSINTE BRANCHED|cycloidea and PCF (TCP) 14	TEOSINTE BRANCHED, cycloidea and PCF (TCP) 14	protein-coding
merged_clf_H3K9_q_0.05_with_ctrl.peaks_peak_16268	5	6135830	6136717	+	249	NA	intron (AT5G18490.1, intron 1 of 1)	intron (AT5G18490.1, intron 1 of 1)	534	AT5G18490.1	831967	At.26472	NM_121854		AT5G18490	T28N17.2	vacuolar sorting-associated protein (DUF946)	protein-coding
merged_clf_H3K9_q_0.05_with_ctrl.peaks_peak_2829	1	18138197	18138786	+	249	NA	TTS (AT1G49040.1)	TTS (AT1G49040.1)	322	AT1G49032.2	6240812	At.24315	NM_001123985		AT1G49032	-	hypothetical protein	protein-coding
merged_clf_H3K9_q_0.05_with_ctrl.peaks_peak_17018	5	14065536	14066241	+	249	NA	TTS (AT5G35930.3)	TTS (AT5G35930.3)	285	AT5G35927.1	28721217		NM_001344119		AT5G35927	-	hypothetical protein	protein-coding
merged_clf_H3K9_q_0.05_with_ctrl.peaks_peak_118	1	486892	487694	+	249	NA	exon (AT1G02400.2, exon 1 of 2)	exon (AT1G02400.2, exon 1 of 2)	492	AT1G02400.2	839508	At.42605	NM_100121		GA2OX6	ARABIDOPSIS THALIANA GIBBERELLIN 2-OXIDASE 4|ARABIDOPSIS THALIANA GIBBERELLIN 2-OXIDASE 6|ATGA2OX4|ATGA2OX6|Arabidopsis thaliana gibberellin 2-oxidase 4|DOWNSTREAM TARGET OF AGL15 1|DTA1|T6A9.9|T6A9_9|gibberellin 2-oxidase 6	gibberellin 2-oxidase 6	protein-coding
merged_clf_H3K9_q_0.05_with_ctrl.peaks_peak_5502	2	5906520	5907427	+	249	NA	exon (AT2G14045.4, exon 1 of 5)	exon (AT2G14045.4, exon 1 of 5)	423	AT2G14045.3	815889	At.21382	NM_147314		AT2G14045	-	c-Myc-binding protein	protein-coding
merged_clf_H3K9_q_0.05_with_ctrl.peaks_peak_7326	2	16528472	16529378	+	249	NA	exon (AT2G39650.2, exon 1 of 2)	exon (AT2G39650.2, exon 1 of 2)	569	AT2G39650.2	818548	At.24780	NM_129521		AT2G39650	F12L6.31|F12L6_31	cruciferin (DUF506)	protein-coding
merged_clf_H3K9_q_0.05_with_ctrl.peaks_peak_612	1	2715778	2716375	+	249	NA	intron (AT1G08580.1, intron 1 of 3)	intron (AT1G08580.1, intron 1 of 3)	456	AT1G08580.1	837380	At.42259	NM_100731		AT1G08580	F22O13.6|F22O13_6	hypothetical protein	protein-coding
merged_clf_H3K9_q_0.05_with_ctrl.peaks_peak_13930	4	14513703	14514517	+	249	NA	intron (AT4G29590.1, intron 1 of 7)	intron (AT4G29590.1, intron 1 of 7)	478	AT4G29590.1	829080	At.3482	NM_119104		AT4G29590	T16L4.100|T16L4_100	S-adenosyl-L-methionine-dependent methyltransferases superfamily protein	protein-coding
merged_clf_H3K9_q_0.05_with_ctrl.peaks_peak_18856	5	24931913	24932539	+	249	NA	exon (AT5G62070.1, exon 1 of 2)	exon (AT5G62070.1, exon 1 of 2)	460	AT5G62070.1	836327	At.26591	NM_125600		IQD23	IQ-domain 23|MTG10.10|MTG10_10	IQ-domain 23	protein-coding
merged_clf_H3K9_q_0.05_with_ctrl.peaks_peak_11967	4	522636	524198	+	249	NA	intron (AT4G01250.1, intron 2 of 2)	intron (AT4G01250.1, intron 2 of 2)	832	AT4G01250.1	827896	At.3803	NM_116355		WRKY22	AtWRKY22|F2N1.6|F2N1_6	WRKY family transcription factor	protein-coding
merged_clf_H3K9_q_0.05_with_ctrl.peaks_peak_13412	4	12142239	12143785	+	249	NA	exon (AT4G23190.4, exon 1 of 7)	exon (AT4G23190.4, exon 1 of 7)	464	AT4G23190.4	828418	At.50	NM_118448		CRK11	AT-RLK3|F21P8.80|F21P8_80|RECEPTOR LIKE PROTEIN KINASE 3|cysteine-rich RLK (RECEPTOR-like protein kinase) 11	cysteine-rich RLK (RECEPTOR-like protein kinase) 11	protein-coding
merged_clf_H3K9_q_0.05_with_ctrl.peaks_peak_10464	3	16623324	16624935	+	249	NA	intron (AT3G45300.1, intron 3 of 14)	intron (AT3G45300.1, intron 3 of 14)	914	AT3G45300.1	823668	At.428	NM_114399		IVD	ATIVD|ISOVALERYL-COA-DEHYDROGENASE|ISOVALERYL-COA-DEHYDROGENASE PRECURSOR|IVDH|isovaleryl-CoA-dehydrogenase	isovaleryl-CoA-dehydrogenase	protein-coding
merged_clf_H3K9_q_0.05_with_ctrl.peaks_peak_3862	1	24647244	24648285	+	249	NA	exon (AT1G66180.1, exon 1 of 1)	exon (AT1G66180.1, exon 1 of 1)	643	AT1G66180.1	842933	At.24736	NM_105289		AT1G66180	F15E12.7|F15E12_7	Eukaryotic aspartyl protease family protein	protein-coding
merged_clf_H3K9_q_0.05_with_ctrl.peaks_peak_12011	4	735720	736185	+	249	NA	exon (AT4G01710.1, exon 2 of 4)	exon (AT4G01710.1, exon 2 of 4)	299	AT4G01710.1	828087	At.26442	NM_116401		CRK	ARPC5|CROOKED|T15B16.22|T15B16_22	ARP2/3 complex 16 kDa subunit (p16-Arc)	protein-coding
merged_clf_H3K9_q_0.05_with_ctrl.peaks_peak_9713	3	7194872	7195608	+	249	NA	exon (AT3G20600.1, exon 1 of 1)	exon (AT3G20600.1, exon 1 of 1)	469	AT3G20600.1	821607	At.38209	NM_112952		NDR1	NON-RACE SPECIFIC DISEASE RESISTANCE PROTEIN|non race-specific disease resistance 1	Late embryogenesis abundant (LEA) hydroxyproline-rich glycoprotein family	protein-coding
merged_clf_H3K9_q_0.05_with_ctrl.peaks_peak_11761	3	23090988	23092813	+	249	NA	TTS (AT3G62410.1)	TTS (AT3G62410.1)	950	AT3G62420.1	825415	At.48798	NM_116107		BZIP53	ATBZIP53|basic region/leucine zipper motif 53	basic region/leucine zipper motif 53	protein-coding
merged_clf_H3K9_q_0.05_with_ctrl.peaks_peak_555	1	2443916	2444669	+	249	NA	promoter-TSS (AT1G07901.1)	promoter-TSS (AT1G07901.1)	-169	AT1G07901.1	6240572	At.47731	NM_001123773		AT1G07901	-	hypothetical protein	protein-coding
merged_clf_H3K9_q_0.05_with_ctrl.peaks_peak_1539	1	6697021	6697731	+	249	NA	promoter-TSS (AT1G19376.1)	promoter-TSS (AT1G19376.1)	-62	AT1G19376.1	3766755		NR_139764		AT1G19376	52195.SNORNA00002	ncRNA	ncRNA
merged_clf_H3K9_q_0.05_with_ctrl.peaks_peak_8721	3	2645194	2646700	+	249	NA	exon (AT3G08710.3, exon 3 of 4)	exon (AT3G08710.3, exon 3 of 4)	830	AT3G08710.3	820018	At.50160	NM_111705		TH9	ATH9|THIOREDOXIN TYPE H 9|TRX H9|thioredoxin H-type 9	thioredoxin H-type 9	protein-coding
merged_clf_H3K9_q_0.05_with_ctrl.peaks_peak_6420	2	11833103	11834250	+	249	NA	exon (AT2G27770.1, exon 1 of 1)	exon (AT2G27770.1, exon 1 of 1)	751	AT2G27770.1	817323	At.38721	NM_128336		AT2G27770	F15K20.13|F15K20_13	DUF868 family protein (DUF868)	protein-coding
merged_clf_H3K9_q_0.05_with_ctrl.peaks_peak_5961	2	9264902	9266325	+	249	NA	exon (AT2G21660.1, exon 2 of 2)	exon (AT2G21660.1, exon 2 of 2)	780	AT2G21660.2	816705	At.22672	NM_127738		GRP7	''cold|ATGPR7|ATGRP7|CCR2|F2G1.4|GLYCINE RICH PROTEIN 7|GLYCINE-RICH RNA-BINDING PROTEIN 7|GR-RBP7|and rna binding 2|and rna binding 2''|circadian rhythm|cold	cold, circadian rhythm, and rna binding 2	protein-coding
merged_clf_H3K9_q_0.05_with_ctrl.peaks_peak_5388	2	1703474	1704005	+	248	NA	promoter-TSS (AT2G04850.1)	promoter-TSS (AT2G04850.1)	306	AT2G04845.3	815030	At.41254	NM_126516		AT2G04845	-	Acyl-CoA N-acyltransferases (NAT) superfamily protein	protein-coding
merged_clf_H3K9_q_0.05_with_ctrl.peaks_peak_16750	5	8693200	8693728	+	248	NA	exon (AT5G25170.2, exon 1 of 2)	exon (AT5G25170.2, exon 1 of 2)	445	AT5G25170.2	832588	At.28576	NM_122426		AT5G25170	F21J6.101|F21J6_101	PPPDE putative thiol peptidase family protein	protein-coding
merged_clf_H3K9_q_0.05_with_ctrl.peaks_peak_692	1	3122970	3123875	+	248	NA	TTS (AT1G09640.1)	TTS (AT1G09640.1)	496	AT1G09645.1	837492	At.49573	NM_148450		AT1G09645	-	transmembrane protein	protein-coding
merged_clf_H3K9_q_0.05_with_ctrl.peaks_peak_17237	5	16202272	16203049	+	248	NA	promoter-TSS (AT5G06065.1)	promoter-TSS (AT5G06065.1)	518	AT5G40460.1	834044	At.21072	NM_123410		AT5G40460	K21I16.3|K21I16_3	cyclin-dependent kinase inhibitor SMR3-like protein	protein-coding
merged_clf_H3K9_q_0.05_with_ctrl.peaks_peak_2670	1	16847749	16848120	+	248	NA	TTS (AT1G44446.3)	TTS (AT1G44446.3)	250	AT1G44414.1	841028	At.49952	NM_103547		AT1G44414	T18F15.8|T18F15_8	zinc-ribbon domain protein	protein-coding
merged_clf_H3K9_q_0.05_with_ctrl.peaks_peak_9192	3	4670456	4671570	+	248	NA	exon (AT3G14090.1, exon 2 of 2)	exon (AT3G14090.1, exon 2 of 2)	783	AT3G14090.1	820625	At.26369	NM_112265		EXO70D3	ATEXO70D3|MAG2.5|exocyst subunit exo70 family protein D3	exocyst subunit exo70 family protein D3	protein-coding
merged_clf_H3K9_q_0.05_with_ctrl.peaks_peak_2214	1	10264280	10265252	+	248	NA	exon (AT1G29340.1, exon 1 of 1)	exon (AT1G29340.1, exon 1 of 1)	723	AT1G29340.1	839808	At.17411	NM_102674		PUB17	ARABIDOPSIS THALIANA PLANT U-BOX 17|ATPUB17|F15D2.34|F15D2_34|plant U-box 17	plant U-box 17	protein-coding
merged_clf_H3K9_q_0.05_with_ctrl.peaks_peak_3625	1	23261215	23261793	+	248	NA	promoter-TSS (AT1G08573.1)	promoter-TSS (AT1G08573.1)	498	AT1G62810.1	842580	At.36219	NM_104959		CuAO1	COPPER AMINE OXIDASE1|F23N19.18|F23N19_18	Copper amine oxidase family protein	protein-coding
merged_clf_H3K9_q_0.05_with_ctrl.peaks_peak_16216	5	5916970	5917448	+	248	NA	exon (AT5G17890.1, exon 1 of 13)	exon (AT5G17890.1, exon 1 of 13)	347	AT5G17890.1	831657	At.43401	NM_121795		DAR4	CHILLING SENSITIVE 3|CHS3|DA1-related protein 4|MPI7.6|MPI7_6	DA1-related protein 4	protein-coding
merged_clf_H3K9_q_0.05_with_ctrl.peaks_peak_15193	5	1216196	1217094	+	248	NA	exon (AT5G04340.1, exon 1 of 1)	exon (AT5G04340.1, exon 1 of 1)	717	AT5G04340.1	830313	At.65029	NM_120516		ZAT6	AtZAT6|C2H2|C2H2 ZINC FINGER TRANSCRIPTION FACTOR|COLD INDUCED ZINC FINGER PROTEIN 2|CZF2|T19N18.70|T19N18_70|zinc finger of Arabidopsis thaliana 6	6	protein-coding
merged_clf_H3K9_q_0.05_with_ctrl.peaks_peak_15295	5	1612029	1613055	+	247	NA	exon (AT5G05450.1, exon 2 of 11)	exon (AT5G05450.1, exon 2 of 11)	805	AT5G05450.1	830428	At.23004	NM_120627		AT5G05450	K18I23.26|K18I23_26	P-loop containing nucleoside triphosphate hydrolases superfamily protein	protein-coding
merged_clf_H3K9_q_0.05_with_ctrl.peaks_peak_894	1	4062659	4063305	+	247	NA	exon (AT1G12020.1, exon 1 of 1)	exon (AT1G12020.1, exon 1 of 1)	567	AT1G12020.1	28717234	At.42097	NM_001332017		AT1G12020	F12F1.11|F12F1_11	hypothetical protein	protein-coding
merged_clf_H3K9_q_0.05_with_ctrl.peaks_peak_449	1	1992364	1993010	+	247	NA	promoter-TSS (AT1G06515.2)	promoter-TSS (AT1G06515.2)	458	AT1G06510.1	837162	At.42337	NM_100530		AT1G06510	F12K11.16|F12K11_16	forkhead-associated domain protein	protein-coding
merged_clf_H3K9_q_0.05_with_ctrl.peaks_peak_3782	1	24147045	24147825	+	247	NA	intron (AT1G65000.1, intron 1 of 1)	intron (AT1G65000.1, intron 1 of 1)	510	AT1G65000.1	842808	At.35940	NM_105174		AT1G65000	F13O11.34|F13O11_34	F-box only protein	protein-coding
merged_clf_H3K9_q_0.05_with_ctrl.peaks_peak_10638	3	17688700	17689520	+	247	NA	exon (AT3G47940.1, exon 1 of 2)	exon (AT3G47940.1, exon 1 of 2)	633	AT3G47940.1	823949	At.35757	NM_114663		AT3G47940	-	DNAJ heat shock family protein	protein-coding
merged_clf_H3K9_q_0.05_with_ctrl.peaks_peak_175	1	737386	738034	+	247	NA	intron (AT1G03080.3, intron 1 of 3)	intron (AT1G03080.3, intron 1 of 3)	346	AT1G03080.3	838350	At.42561	NM_100190		NET1D	F10O3.10|F10O3_10|Networked 1D	kinase interacting (KIP1-like) family protein	protein-coding
merged_clf_H3K9_q_0.05_with_ctrl.peaks_peak_8098	3	137962	138817	+	247	NA	promoter-TSS (AT3G01370.1)	promoter-TSS (AT3G01370.1)	342	AT3G01360.1	821158	At.41288	NM_111002		AT3G01360	T13O15.14	plant viral-response family protein (DUF716)	protein-coding
merged_clf_H3K9_q_0.05_with_ctrl.peaks_peak_13228	4	11179370	11180799	+	247	NA	exon (AT4G20880.1, exon 1 of 1)	exon (AT4G20880.1, exon 1 of 1)	965	AT4G20880.1	827836	At.32688	NM_118206		AT4G20880	T13K14.40|T13K14_40	ethylene-responsive nuclear protein / ethylene-regulated nuclear protein (ERT2)	protein-coding
merged_clf_H3K9_q_0.05_with_ctrl.peaks_peak_18868	5	24988709	24989199	+	247	NA	exon (AT5G62220.1, exon 1 of 1)	exon (AT5G62220.1, exon 1 of 1)	-1143	AT5G62210.1	836342	At.8930	NM_125615		AT5G62210	MMI9.4|MMI9_4	Embryo-specific protein 3, (ATS3)	protein-coding
merged_clf_H3K9_q_0.05_with_ctrl.peaks_peak_14563	4	17247073	17248452	+	247	NA	exon (AT4G36550.1, exon 3 of 6)	exon (AT4G36550.1, exon 3 of 6)	699	AT4G36550.1	829807	At.31319	NM_119818		AT4G36550	AP22.63|AP22_63	ARM repeat superfamily protein	protein-coding
merged_clf_H3K9_q_0.05_with_ctrl.peaks_peak_1268	1	5518349	5519232	+	247	NA	promoter-TSS (AT1G16100.1)	promoter-TSS (AT1G16100.1)	571	AT1G16110.1	838180	At.41901	NM_101478		WAKL6	T24D18.30|T24D18_30|wall associated kinase-like 6	wall associated kinase-like 6	protein-coding
merged_clf_H3K9_q_0.05_with_ctrl.peaks_peak_3145	1	20180865	20181856	+	246	NA	promoter-TSS (AT1G54050.1)	promoter-TSS (AT1G54050.1)	750	AT1G54060.1	841844	At.19741	NM_104283		ASIL1	6B-interacting protein 1-like 1|F15I1.14|F15I1_14	6B-interacting protein 1-like 1	protein-coding
merged_clf_H3K9_q_0.05_with_ctrl.peaks_peak_10536	3	17161735	17162437	+	246	NA	exon (AT3G46610.1, exon 1 of 2)	exon (AT3G46610.1, exon 1 of 2)	389	AT3G46610.1	823814	At.49645	NM_114528		AT3G46610	-	Pentatricopeptide repeat (PPR-like) superfamily protein	protein-coding
merged_clf_H3K9_q_0.05_with_ctrl.peaks_peak_6267	2	11008899	11009713	+	246	NA	exon (AT2G25800.1, exon 1 of 5)	exon (AT2G25800.1, exon 1 of 5)	555	AT2G25800.1	817122	At.20496	NM_128140		AT2G25800	F17H15.17|F17H15_17	elongation factor Ts (DUF810)	protein-coding
merged_clf_H3K9_q_0.05_with_ctrl.peaks_peak_495	1	2173789	2174806	+	246	NA	exon (AT1G07090.1, exon 1 of 1)	exon (AT1G07090.1, exon 1 of 1)	741	AT1G07090.1	837220	At.42313	NM_100583		LSH6	F10K1.20|F10K1_20|LIGHT SENSITIVE HYPOCOTYLS 6	LIGHT-DEPENDENT SHORT HYPOCOTYLS-like protein (DUF640)	protein-coding
merged_clf_H3K9_q_0.05_with_ctrl.peaks_peak_1059	1	4748956	4749845	+	246	NA	promoter-TSS (AT1G13870.1)	promoter-TSS (AT1G13870.1)	527	AT1G13880.3	837947	At.47470	NM_101254		AT1G13880	ELM2|F16A14.9|F16A14_9	ELM2 domain-containing protein	protein-coding
merged_clf_H3K9_q_0.05_with_ctrl.peaks_peak_12905	4	9427789	9428808	+	246	NA	intron (AT4G16760.1, intron 2 of 13)	intron (AT4G16760.1, intron 2 of 13)	596	AT4G16760.1	827381	At.20864	NM_117778		ACX1	ATACX1|DL4405C|FCAALL.119|acyl-CoA oxidase 1	acyl-CoA oxidase 1	protein-coding
merged_clf_H3K9_q_0.05_with_ctrl.peaks_peak_6107	2	10063182	10063850	+	246	NA	exon (AT2G23672.1, exon 1 of 1)	exon (AT2G23672.1, exon 1 of 1)	347	AT2G23670.1	816898	At.12618	NM_127930		YCF37	F26B6.28|homolog of Synechocystis YCF37	homolog of Synechocystis YCF37	protein-coding
merged_clf_H3K9_q_0.05_with_ctrl.peaks_peak_2925	1	18756872	18758407	+	246	NA	exon (AT1G50640.1, exon 1 of 1)	exon (AT1G50640.1, exon 1 of 1)	1069	AT1G50640.1	841486	At.1645	NM_103946		ERF3	ATERF-3|ATERF3|F11F12.4|F11F12_4|ethylene responsive element binding factor 3	ethylene responsive element binding factor 3	protein-coding
merged_clf_H3K9_q_0.05_with_ctrl.peaks_peak_6104	2	10045528	10046526	+	246	NA	intron (AT2G23610.1, intron 1 of 2)	intron (AT2G23610.1, intron 1 of 2)	505	AT2G23610.2	816893	At.27995	NM_127925		MES3	ARABIDOPSIS THALIANA METHYL ESTERASE 3|ATMES3|F26B6.26|F26B6_26|methyl esterase 3	methyl esterase 3	protein-coding
merged_clf_H3K9_q_0.05_with_ctrl.peaks_peak_8642	3	2365500	2366246	+	246	NA	exon (AT3G07390.2, exon 1 of 2)	exon (AT3G07390.2, exon 1 of 2)	572	AT3G07390.1	819927	At.48629	NM_111618		AIR12	Auxin-Induced in Root cultures 12	auxin-induced in root cultures-like protein	protein-coding
merged_clf_H3K9_q_0.05_with_ctrl.peaks_peak_8799	3	2989473	2990136	+	246	NA	intron (AT3G09740.1, intron 1 of 8)	intron (AT3G09740.1, intron 1 of 8)	448	AT3G09740.1	820132	At.20899	NM_111809		SYP71	ATSYP71|syntaxin of plants 71	syntaxin of plants 71	protein-coding
merged_clf_H3K9_q_0.05_with_ctrl.peaks_peak_6474	2	12187797	12188145	+	246	NA	exon (AT2G28500.1, exon 1 of 2)	exon (AT2G28500.1, exon 1 of 2)	322	AT2G28500.1	817398	At.50670	NM_128410		LBD11	LOB domain-containing protein 11|T17D12.6|T17D12_6	LOB domain-containing protein 11	protein-coding
merged_clf_H3K9_q_0.05_with_ctrl.peaks_peak_5849	2	8705662	8706756	+	246	NA	exon (AT2G20180.6, exon 2 of 7)	exon (AT2G20180.6, exon 2 of 7)	691	AT2G20180.5	816538	At.43003	NM_179665		PIL5	PHY-INTERACTING FACTOR 1|PIF1|T2G17.2|T2G17_2|phytochrome interacting factor 3-like 5	phytochrome interacting factor 3-like 5	protein-coding
merged_clf_H3K9_q_0.05_with_ctrl.peaks_peak_10534	3	17157971	17159220	+	245	NA	exon (AT3G46600.2, exon 2 of 2)	exon (AT3G46600.2, exon 2 of 2)	671	AT3G46600.3	823813	At.595	NM_114527		AT3G46600	-	GRAS family transcription factor	protein-coding
merged_clf_H3K9_q_0.05_with_ctrl.peaks_peak_6605	2	12937407	12938669	+	245	NA	promoter-TSS (AT2G30362.3)	promoter-TSS (AT2G30362.3)	-609	AT2G30362.3	5007913		NR_140677		AT2G30362	-	ncRNA	ncRNA
merged_clf_H3K9_q_0.05_with_ctrl.peaks_peak_7074	2	15278848	15280211	+	245	NA	intron (AT2G36410.1, intron 1 of 3)	intron (AT2G36410.1, intron 1 of 3)	760	AT2G36410.1	818215	At.37557	NM_129198		AT2G36410	F1O11.4|F1O11_4	transcriptional activator (DUF662)	protein-coding
merged_clf_H3K9_q_0.05_with_ctrl.peaks_peak_19372	5	26854018	26855443	+	245	NA	promoter-TSS (AT5G09855.1)	promoter-TSS (AT5G09855.1)	-214	AT5G09855.1	28721135		NR_143242		AT5G09855	-	ncRNA	ncRNA
merged_clf_H3K9_q_0.05_with_ctrl.peaks_peak_9800	3	7691091	7691495	+	245	NA	TTS (AT3G21825.1)	TTS (AT3G21825.1)	274	AT3G21820.1	821736	At.5858	NM_113077		ATXR2	SDG36|SET DOMAIN PROTEIN 36|histone-lysine N-methyltransferase ATXR2	histone-lysine N-methyltransferase ATXR2	protein-coding
merged_clf_H3K9_q_0.05_with_ctrl.peaks_peak_15678	5	3398974	3400115	+	245	NA	TTS (AT5G10760.1)	TTS (AT5G10760.1)	754	AT5G10750.1	830942	At.43940	NM_121113		AT5G10750	MAJ23.2	enhanced disease resistance-like protein (DUF1336)	protein-coding
merged_clf_H3K9_q_0.05_with_ctrl.peaks_peak_6698	2	13474428	13474992	+	245	NA	exon (AT2G31680.1, exon 1 of 2)	exon (AT2G31680.1, exon 1 of 2)	375	AT2G31680.1	817724	At.66393	NM_128725		RABA5d	AtRABA5d|RAB GTPase homolog A5D|T9H9.20|T9H9_20	RAB GTPase homolog A5D	protein-coding
merged_clf_H3K9_q_0.05_with_ctrl.peaks_peak_438	1	1951384	1952831	+	245	NA	intron (AT1G06400.1, intron 1 of 1)	intron (AT1G06400.1, intron 1 of 1)	773	AT1G06400.1	837151	At.133	NM_100520		ARA-2	ARA2|ARABIDOPSIS THALIANA RAB GTPASE HOMOLOG A1A|ATRAB11E|ATRABA1A|SMALL GTP-BINDING PROTEIN|T2D23.10|T2D23_10	Ras-related small GTP-binding family protein	protein-coding
merged_clf_H3K9_q_0.05_with_ctrl.peaks_peak_11263	3	20776349	20777859	+	245	NA	exon (AT3G55980.2, exon 2 of 2)	exon (AT3G55980.2, exon 2 of 2)	839	AT3G55980.1	824764	At.21697	NM_115456		SZF1	ATSZF1|salt-inducible zinc finger 1	salt-inducible zinc finger 1	protein-coding
merged_clf_H3K9_q_0.05_with_ctrl.peaks_peak_16032	5	5005372	5006800	+	245	NA	exon (AT5G15410.2, exon 3 of 9)	exon (AT5G15410.2, exon 3 of 9)	796	AT5G15410.2	831393	At.20813	NM_121545		DND1	ATCNGC2|CNGC2|CYCLIC NUCLEOTIDE GATED CHANNEL 2|CYCLIC NUCLEOTIDE-GATED CHANNEL 2|DEFENSE NO DEATH 1	Cyclic nucleotide-regulated ion channel family protein	protein-coding
merged_clf_H3K9_q_0.05_with_ctrl.peaks_peak_14118	4	15316381	15317104	+	245	NA	promoter-TSS (AT4G31610.2)	promoter-TSS (AT4G31610.2)	393	AT4G31600.2	829287	At.2366	NM_119309		UTr7	F28M20.210|F28M20_210|UDP-galactose transporter 7	UDP-N-acetylglucosamine (UAA) transporter family	protein-coding
merged_clf_H3K9_q_0.05_with_ctrl.peaks_peak_15906	5	4442038	4444595	+	245	NA	exon (AT5G13760.1, exon 3 of 5)	exon (AT5G13760.1, exon 3 of 5)	1458	AT5G13760.1	831221	At.19625	NM_121379		AT5G13760	MXE10.1|MXE10_1	Plasma-membrane choline transporter family protein	protein-coding
merged_clf_H3K9_q_0.05_with_ctrl.peaks_peak_16694	5	8342165	8342939	+	245	NA	exon (AT5G24430.1, exon 1 of 11)	exon (AT5G24430.1, exon 1 of 11)	732	AT5G24430.1	832514	At.28684	NM_122351		AT5G24430	K16H17.14|K16H17_14	Calcium-dependent protein kinase (CDPK) family protein	protein-coding
merged_clf_H3K9_q_0.05_with_ctrl.peaks_peak_19182	5	26149274	26150316	+	245	NA	exon (AT5G65430.3, exon 1 of 3)	exon (AT5G65430.3, exon 1 of 3)	547	AT5G65430.2	836668	At.10382	NM_125941		GRF8	14-3-3 PROTEIN G-BOX FACTOR14 KAPPA|14-3-3KAPPA|GF14 KAPPA|GF14 KAPPA ISOFORM|MNA5.16|MNA5_16|general regulatory factor 8	general regulatory factor 8	protein-coding
merged_clf_H3K9_q_0.05_with_ctrl.peaks_peak_11246	3	20736615	20737976	+	245	NA	promoter-TSS (AT3G08605.1)	promoter-TSS (AT3G08605.1)	-414	AT3G08605.1	28719144		NR_141466		U5.1b	-	ncRNA	ncRNA
merged_clf_H3K9_q_0.05_with_ctrl.peaks_peak_2799	1	17940101	17940731	+	245	NA	exon (AT1G48520.2, exon 1 of 7)	exon (AT1G48520.2, exon 1 of 7)	328	AT1G48520.3	841273	At.22009	NM_103748		GATB	GLU-ADT subunit B	GLU-ADT subunit B	protein-coding
merged_clf_H3K9_q_0.05_with_ctrl.peaks_peak_455	1	2012108	2013475	+	244	NA	TTS (AT1G06560.1)	TTS (AT1G06560.1)	668	AT1G06570.1	837168	At.48158	NM_100536		PDS1	4-HYDROXYPHENYLPYRUVATE DIOXYGENASE|4-hydroxyphenylpyruvate dioxygenase|F12K11.9|F12K11_9|HPD|HPPD|P-HYDROXYPHENYLPYRUVATE DIOXYGENASE|phytoene desaturation 1	4-hydroxyphenylpyruvate dioxygenase	protein-coding
merged_clf_H3K9_q_0.05_with_ctrl.peaks_peak_15845	5	4156730	4158040	+	244	NA	exon (AT5G13100.1, exon 1 of 4)	exon (AT5G13100.1, exon 1 of 4)	884	AT5G13100.1	831149	At.25168	NM_121313		AT5G13100	T19L5.60|T19L5_60	Gap junction beta-4 protein	protein-coding
merged_clf_H3K9_q_0.05_with_ctrl.peaks_peak_13616	4	13088184	13088947	+	244	NA	intron (AT4G25680.1, intron 1 of 3)	intron (AT4G25680.1, intron 1 of 3)	592	AT4G25680.1	828673	At.32241	NM_118700		AT4G25680	L73G19.60|L73G19_60	PPPDE putative thiol peptidase family protein	protein-coding
merged_clf_H3K9_q_0.05_with_ctrl.peaks_peak_12172	4	1573373	1574391	+	244	NA	exon (AT4G03550.1, exon 1 of 5)	exon (AT4G03550.1, exon 1 of 5)	616	AT4G03550.1	825650	At.3956	NM_116593		GSL05	ATGSL05|ATGSL5|EED3|GLUCAN SYNTHASE-LIKE 5|GSL5|PMR4|POWDERY MILDEW RESISTANT 4|T5L23.4|enhancer of edr1 3|glucan synthase-like 5	glucan synthase-like 5	protein-coding
merged_clf_H3K9_q_0.05_with_ctrl.peaks_peak_15898	5	4427875	4428471	+	244	NA	promoter-TSS (AT5G13710.1)	promoter-TSS (AT5G13710.1)	390	AT5G13720.1	831217	At.43777	NM_121375		AT5G13720	MSH12.19|MSH12_19	Uncharacterized protein family (UPF0114)	protein-coding
merged_clf_H3K9_q_0.05_with_ctrl.peaks_peak_6924	2	14591017	14591767	+	244	NA	exon (AT2G34650.1, exon 1 of 2)	exon (AT2G34650.1, exon 1 of 2)	748	AT2G34650.1	818030	At.19528	NM_129019		PID	ABR|ABRUPTUS|PINOID|PROTEIN KINASE PINOID|T31E10.1|T31E10_1	Protein kinase superfamily protein	protein-coding
merged_clf_H3K9_q_0.05_with_ctrl.peaks_peak_8495	3	1755595	1756559	+	244	NA	TTS (AT3G05870.1)	TTS (AT3G05870.1)	191	AT3G01795.1	28718517		NR_140861		AT3G01795	-	ncRNA	ncRNA
merged_clf_H3K9_q_0.05_with_ctrl.peaks_peak_16484	5	7205699	7206982	+	244	NA	promoter-TSS (AT5G21170.3)	promoter-TSS (AT5G21170.3)	673	AT5G21170.2	832243	At.21001	NM_122124		AKINBETA1	KINbeta1|T10F18.200|T10F18_200	5'-AMP-activated protein kinase beta-2 subunit protein	protein-coding
merged_clf_H3K9_q_0.05_with_ctrl.peaks_peak_10823	3	18743089	18744041	+	244	NA	intron (AT3G50500.1, intron 1 of 8)	intron (AT3G50500.1, intron 1 of 8)	592	AT3G50500.2	824214	At.313	NM_114910		SNRK2.2	PROTEIN KINASE|SNF1-RELATED PROTEIN KINASE 2-2|SNF1-related protein kinase 2.2|SNRK2-2|SPK-2-2|SRK2D	SNF1-related protein kinase 2.2	protein-coding
merged_clf_H3K9_q_0.05_with_ctrl.peaks_peak_10143	3	9801282	9802084	+	244	NA	promoter-TSS (AT3G26670.4)	promoter-TSS (AT3G26670.4)	473	AT3G26680.4	822280	At.21140	NM_180304		SNM1	ATSNM1|SENSITIVE TO NITROGEN MUSTARD 1	DNA repair metallo-beta-lactamase family protein	protein-coding
merged_clf_H3K9_q_0.05_with_ctrl.peaks_peak_12071	4	1045554	1046958	+	244	NA	TTS (at4g04125)	TTS (at4g04125)	727	at4g04125
merged_clf_H3K9_q_0.05_with_ctrl.peaks_peak_1736	1	7691326	7692340	+	244	NA	intron (AT1G21900.1, intron 1 of 3)	intron (AT1G21900.1, intron 1 of 3)	626	AT1G21900.1	838792	At.41637	NM_102038		p24delta5	T26F17.12|T26F17_12|p24 subfamily delta 5	emp24/gp25L/p24 family/GOLD family protein	protein-coding
merged_clf_H3K9_q_0.05_with_ctrl.peaks_peak_15192	5	1212580	1213295	+	244	NA	TTS (AT5G04320.4)	TTS (AT5G04320.4)	1502	AT5G04330.1	830312	At.50430	NM_120515		CYP84A4	CYTOCHROME P450 84A4|T19N18.60|T19N18_60	Cytochrome P450 superfamily protein	protein-coding
merged_clf_H3K9_q_0.05_with_ctrl.peaks_peak_14162	4	15519137	15519855	+	244	NA	TTS (AT4G32130.1)	TTS (AT4G32130.1)	500	AT4G32120.1	829344	At.25086	NM_119364		AT4G32120	F10N7.70|F10N7_70	Galactosyltransferase family protein	protein-coding
merged_clf_H3K9_q_0.05_with_ctrl.peaks_peak_9334	3	5341434	5342043	+	244	NA	promoter-TSS (AT3G15790.1)	promoter-TSS (AT3G15790.1)	382	AT3G15780.1	820821	At.27224	NM_112448		AT3G15780	-	transmembrane protein	protein-coding
merged_clf_H3K9_q_0.05_with_ctrl.peaks_peak_8402	3	1362916	1363914	+	244	NA	TTS (AT3G04920.1)	TTS (AT3G04920.1)	510	AT3G04930.2	819653	At.17642	NM_111365		AT3G04930	T9J14.12|T9J14_12	DNA-binding storekeeper protein-related transcriptional regulator	protein-coding
merged_clf_H3K9_q_0.05_with_ctrl.peaks_peak_19208	5	26261411	26263182	+	244	NA	exon (AT5G65683.1, exon 2 of 2)	exon (AT5G65683.1, exon 2 of 2)	1160	AT5G65683.1	836695	At.44174	NM_148162		WAVH2	WAV3 homolog 2	Zinc finger (C3HC4-type RING finger) family protein	protein-coding
merged_clf_H3K9_q_0.05_with_ctrl.peaks_peak_15566	5	2859056	2860240	+	244	NA	TTS (AT5G08780.1)	TTS (AT5G08780.1)	910	AT5G08790.1	830779	At.27826	NM_147856		ATAF2	Arabidopsis NAC domain containing protein 81|anac081	NAC (No Apical Meristem) domain transcriptional regulator superfamily protein	protein-coding
merged_clf_H3K9_q_0.05_with_ctrl.peaks_peak_17084	5	15005400	15006146	+	244	NA	intron (AT5G37780.3, intron 1 of 2)	intron (AT5G37780.3, intron 1 of 2)	432	AT5G37780.3	833756	At.294	NM_123137		CAM1	ACAM-1|K22F20.20|K22F20_20|TCH1|TOUCH 1|calmodulin 1	calmodulin 1	protein-coding
merged_clf_H3K9_q_0.05_with_ctrl.peaks_peak_17722	5	19171985	19172808	+	244	NA	exon (AT5G47220.1, exon 1 of 1)	exon (AT5G47220.1, exon 1 of 1)	560	AT5G47220.1	834768	At.19731	NM_124093		ERF2	ATERF-2|ATERF2|ETHYLENE RESPONSE FACTOR- 2|ETHYLENE RESPONSIVE ELEMENT BINDING FACTOR 2|MQL5.7|MQL5_7|ethylene responsive element binding factor 2	ethylene responsive element binding factor 2	protein-coding
merged_clf_H3K9_q_0.05_with_ctrl.peaks_peak_13599	4	13015444	13016165	+	244	NA	exon (AT4G25470.1, exon 1 of 1)	exon (AT4G25470.1, exon 1 of 1)	431	AT4G25470.1	828651	At.233	NM_118679		CBF2	ATCBF2|C-repeat/DRE binding factor 2|DRE/CRT-BINDING PROTEIN|DRE/CRT-BINDING PROTEIN 1C|DREB1C|FREEZING TOLERANCE QTL 4|FTQ4|T30C3.12	C-repeat/DRE binding factor 2	protein-coding
merged_clf_H3K9_q_0.05_with_ctrl.peaks_peak_10981	3	19450739	19451343	+	244	NA	TTS (AT3G52480.1)	TTS (AT3G52480.1)	535	AT3G52470.1	824412	At.20394	NM_115107		AT3G52470	-	Late embryogenesis abundant (LEA) hydroxyproline-rich glycoprotein family	protein-coding
merged_clf_H3K9_q_0.05_with_ctrl.peaks_peak_7567	2	17639000	17640073	+	244	NA	exon (AT2G42350.1, exon 1 of 1)	exon (AT2G42350.1, exon 1 of 1)	535	AT2G42350.1	818836	At.42716	NM_129797		AT2G42350	MHK10.7|MHK10_7	RING/U-box superfamily protein	protein-coding
merged_clf_H3K9_q_0.05_with_ctrl.peaks_peak_15031	5	437434	437997	+	244	NA	TTS (AT5G02190.1)	TTS (AT5G02190.1)	350	AT5G02200.1	830832	At.50419	NM_120298		FHL	T7H20.250|T7H20_250|far-red-elongated hypocotyl1-like	far-red-elongated hypocotyl1-like protein	protein-coding
merged_clf_H3K9_q_0.05_with_ctrl.peaks_peak_1697	1	7509034	7510071	+	244	NA	intron (AT1G21450.1, intron 1 of 1)	intron (AT1G21450.1, intron 1 of 1)	851	AT1G21450.1	838743	At.14825	NM_101996		SCL1	F24J8.8|F24J8_8|SCARECROW-like 1	SCARECROW-like 1	protein-coding
merged_clf_H3K9_q_0.05_with_ctrl.peaks_peak_12290	4	4798026	4798525	+	244	NA	intron (AT4G07950.1, intron 1 of 2)	intron (AT4G07950.1, intron 1 of 2)	434	AT4G07950.1	826299	At.33786	NM_116865		AT4G07950	F1K3.2|F1K3_2	DNA-directed RNA polymerase, subunit M, archaeal	protein-coding
merged_clf_H3K9_q_0.05_with_ctrl.peaks_peak_13291	4	11529980	11530657	+	244	NA	exon (AT4G21700.1, exon 1 of 1)	exon (AT4G21700.1, exon 1 of 1)	362	AT4G21700.1	828257	At.54462	NM_118290		AT4G21700	F17L22.160|F17L22_160	DUF2921 family protein, putative (DUF2921)	protein-coding
merged_clf_H3K9_q_0.05_with_ctrl.peaks_peak_2564	1	12840404	12841592	+	244	NA	Intergenic	Intergenic	-10985	AT1G35140.1	840399	At.24168	NM_103210		PHI-1	EXL1|EXL7|EXORDIUM LIKE 7|EXORDIUM like 1|PHOSPHATE-INDUCED 1|T32G9.32|T32G9_32	Phosphate-responsive 1 family protein	protein-coding
merged_clf_H3K9_q_0.05_with_ctrl.peaks_peak_15791	5	3878504	3879533	+	244	NA	exon (AT5G12010.1, exon 1 of 1)	exon (AT5G12010.1, exon 1 of 1)	639	AT5G12010.1	831074	At.5105	NM_121239		AT5G12010	F14F18.180|F14F18_180	nuclease	protein-coding
merged_clf_H3K9_q_0.05_with_ctrl.peaks_peak_16193	5	5800093	5801093	+	244	NA	exon (AT5G17600.1, exon 1 of 1)	exon (AT5G17600.1, exon 1 of 1)	825	AT5G17600.1	831626	At.28195	NM_121766		AT5G17600	K10A8.80|K10A8_80	RING/U-box superfamily protein	protein-coding
merged_clf_H3K9_q_0.05_with_ctrl.peaks_peak_2577	1	12982617	12984647	+	244	NA	intron (AT1G35350.2, intron 1 of 10)	intron (AT1G35350.2, intron 1 of 10)	1008	AT1G35350.2	840424	At.49310	NM_103232		AT1G35350	T9I1.12|T9I1_12	EXS (ERD1/XPR1/SYG1) family protein	protein-coding
merged_clf_H3K9_q_0.05_with_ctrl.peaks_peak_1612	1	7088050	7089201	+	244	NA	exon (AT1G20450.1, exon 2 of 2)	exon (AT1G20450.1, exon 2 of 2)	981	AT1G20450.2	838633	At.24491	NM_101895		ERD10	EARLY RESPONSIVE TO DEHYDRATION 10|ER10|F5M15.21|F5M15_21|LOW TEMPERATURE INDUCED 29|LOW TEMPERATURE INDUCED 45|LTI29|LTI45	Dehydrin family protein	protein-coding
merged_clf_H3K9_q_0.05_with_ctrl.peaks_peak_8590	3	2159171	2160514	+	244	NA	intron (AT3G06850.1, intron 2 of 6)	intron (AT3G06850.1, intron 2 of 6)	804	AT3G06850.1	819869	At.24601	NM_111565		BCE2	DARK INDUCIBLE 3|DIN3|LTA1	2-oxoacid dehydrogenases acyltransferase family protein	protein-coding
merged_clf_H3K9_q_0.05_with_ctrl.peaks_peak_6740	2	13659016	13660504	+	243	NA	exon (AT2G32150.2, exon 5 of 7)	exon (AT2G32150.2, exon 5 of 7)	756	AT2G32150.3	817774	At.21600	NM_128774		AT2G32150	F22D22.10|F22D22_10	Haloacid dehalogenase-like hydrolase (HAD) superfamily protein	protein-coding
merged_clf_H3K9_q_0.05_with_ctrl.peaks_peak_10528	3	17132186	17133369	+	243	NA	exon (AT3G46530.1, exon 1 of 1)	exon (AT3G46530.1, exon 1 of 1)	685	AT3G46530.1	823806	At.589	NM_114520		RPP13	RECOGNITION OF PERONOSPORA PARASITICA 13	NB-ARC domain-containing disease resistance protein	protein-coding
merged_clf_H3K9_q_0.05_with_ctrl.peaks_peak_13	1	66419	67615	+	243	NA	intron (AT1G01140.2, intron 1 of 13)	intron (AT1G01140.2, intron 1 of 13)	608	AT1G01140.3	839349	At.11899	NM_099996		CIPK9	CBL-interacting protein kinase 9|F6F3.28|PKS6|PROTEIN KINASE 6|SNF1-RELATED PROTEIN KINASE 3.12|SnRK3.12	CBL-interacting protein kinase 9	protein-coding
merged_clf_H3K9_q_0.05_with_ctrl.peaks_peak_1244	1	5442746	5443626	+	243	NA	intron (AT1G15800.1, intron 1 of 4)	intron (AT1G15800.1, intron 1 of 4)	725	AT1G15800.1	838149	At.41915	NM_101448		AT1G15800	F7H2.14|F7H2_14	hypothetical protein	protein-coding
merged_clf_H3K9_q_0.05_with_ctrl.peaks_peak_4667	1	28515447	28515879	+	243	NA	promoter-TSS (AT1G75950.1)	promoter-TSS (AT1G75950.1)	253	AT1G75945.1	28717429		NM_001334702		AT1G75945	-	hypothetical protein	protein-coding
merged_clf_H3K9_q_0.05_with_ctrl.peaks_peak_15914	5	4473433	4474346	+	243	NA	TTS (AT5G13850.1)	TTS (AT5G13850.1)	641	AT5G13860.1	831232	At.49744	NM_121389		ELC-Like	ELCH-like|MAC12.18|MAC12_18	ELCH-like protein	protein-coding
merged_clf_H3K9_q_0.05_with_ctrl.peaks_peak_644	1	2877638	2878191	+	243	NA	TTS (AT1G08930.2)	TTS (AT1G08930.2)	484	AT1G08940.1	837415	At.43619	NM_100766		AT1G08940	F7G19.18|F7G19_18	Phosphoglycerate mutase family protein	protein-coding
merged_clf_H3K9_q_0.05_with_ctrl.peaks_peak_5496	2	5741917	5742856	+	243	NA	intron (AT2G13790.1, intron 2 of 10)	intron (AT2G13790.1, intron 2 of 10)	794	AT2G13790.1	815862	At.13851	NM_126955		SERK4	AT2G13780|ATSERK4|BAK1-LIKE 1|BAK7|BKK1|BRI1- ASSOCIATED KINASE 7|BRI1- ASSOCIATED KINASE 7|F13J11.14|F13J11_14|SOMATIC EMBRYOGENESIS RECEPTOR-LIKE KINASE 4|somatic embryogenesis receptor-like kinase 4	somatic embryogenesis receptor-like kinase 4	protein-coding
merged_clf_H3K9_q_0.05_with_ctrl.peaks_peak_7040	2	15135867	15136692	+	243	NA	exon (AT2G36050.1, exon 1 of 1)	exon (AT2G36050.1, exon 1 of 1)	733	AT2G36050.1	818178	At.14241	NM_129164		OFP15	ARABIDOPSIS THALIANA OVATE FAMILY PROTEIN 15|ATOFP15|F11F19.32|F11F19_32|ovate family protein 15	ovate family protein 15	protein-coding
merged_clf_H3K9_q_0.05_with_ctrl.peaks_peak_9457	3	5891384	5892205	+	243	NA	TTS (AT3G17250.1)	TTS (AT3G17250.1)	422	AT3G17240.2	820984	At.20793	NM_112601		mtLPD2	LIPOAMIDE DEHYDROGENASE 2|lipoamide dehydrogenase 2	lipoamide dehydrogenase 2	protein-coding
merged_clf_H3K9_q_0.05_with_ctrl.peaks_peak_11299	3	20920297	20921258	+	242	NA	promoter-TSS (AT3G56410.3)	promoter-TSS (AT3G56410.3)	-258	AT3G56410.3	824808	At.34938	NM_115499		AT3G56410	-	hypothetical protein (DUF3133)	protein-coding
merged_clf_H3K9_q_0.05_with_ctrl.peaks_peak_18625	5	23818724	23819470	+	242	NA	TTS (AT5G59010.1)	TTS (AT5G59010.1)	913	AT5G59000.1	836017	At.29249	NM_125290		AT5G59000	K19M22.19|K19M22_19	RING/FYVE/PHD zinc finger superfamily protein	protein-coding
merged_clf_H3K9_q_0.05_with_ctrl.peaks_peak_16231	5	5995489	5996733	+	242	NA	exon (AT5G18130.1, exon 1 of 2)	exon (AT5G18130.1, exon 1 of 2)	632	AT5G18130.2	831931	At.7548	NM_121818		AT5G18130	MRG7.9|MRG7_9	transmembrane protein	protein-coding
merged_clf_H3K9_q_0.05_with_ctrl.peaks_peak_13483	4	12479843	12480554	+	242	NA	exon (AT4G24020.2, exon 1 of 6)	exon (AT4G24020.2, exon 1 of 6)	670	AT4G24020.2	828502	At.32386	NM_118534		NLP7	NIN like protein 7|T19F6.10|T19F6_10	NIN like protein 7	protein-coding
merged_clf_H3K9_q_0.05_with_ctrl.peaks_peak_3215	1	20574544	20575094	+	242	NA	promoter-TSS (AT1G55140.2)	promoter-TSS (AT1G55140.2)	339	AT1G55150.1	841958	At.20425	NM_104388		RH20	AtRH20|RNA helicase 20|T7N22.9|T7N22_9	DEA(D/H)-box RNA helicase family protein	protein-coding
merged_clf_H3K9_q_0.05_with_ctrl.peaks_peak_5674	2	7635691	7637647	+	242	NA	exon (AT2G17550.2, exon 2 of 4)	exon (AT2G17550.2, exon 2 of 4)	1163	AT2G17550.2	816262	At.27964	NM_127309		TRM26	MJB20.11|MJB20_11|TON1 Recruiting Motif 26	RB1-inducible coiled-coil protein	protein-coding
merged_clf_H3K9_q_0.05_with_ctrl.peaks_peak_3020	1	19471389	19472425	+	242	NA	exon (AT1G52290.2, exon 2 of 7)	exon (AT1G52290.2, exon 2 of 7)	675	AT1G52290.1	841659	At.37627	NM_104108		PERK15	AtPERK15|F19K6.9|F19K6_9|proline-rich extensin-like receptor kinase 15	Protein kinase superfamily protein	protein-coding
merged_clf_H3K9_q_0.05_with_ctrl.peaks_peak_5910	2	8998722	8999712	+	242	NA	TTS (AT2G20921.1)	TTS (AT2G20921.1)	767	AT2G20920.1	816626	At.28149	NM_127661		AT2G20920	F5H14.11|F5H14_11	chaperone (DUF3353)	protein-coding
merged_clf_H3K9_q_0.05_with_ctrl.peaks_peak_2457	1	11827493	11828752	+	242	NA	intron (AT1G32700.2, intron 1 of 2)	intron (AT1G32700.2, intron 1 of 2)	655	AT1G32700.2	840164	At.16977	NM_103004		AT1G32700	F6N18.8|F6N18_8	PLATZ transcription factor family protein	protein-coding
merged_clf_H3K9_q_0.05_with_ctrl.peaks_peak_4270	1	26814635	26815488	+	242	NA	TTS (AT1G71090.1)	TTS (AT1G71090.1)	801	AT1G71100.1	843450	At.17810	NM_105779		RSW10	F23N20.9|F23N20_9|RADIAL SWELLING 10|RIBOSE 5-PHOSPHATE ISOMERASE|RPI	Ribose 5-phosphate isomerase, type A protein	protein-coding
merged_clf_H3K9_q_0.05_with_ctrl.peaks_peak_1804	1	7976973	7978680	+	242	NA	exon (AT1G22570.2, exon 2 of 3)	exon (AT1G22570.2, exon 2 of 3)	621	AT1G22570.2	838863	At.51725	NM_102105		AT1G22570	F12K8.8|F12K8_8	Major facilitator superfamily protein	protein-coding
merged_clf_H3K9_q_0.05_with_ctrl.peaks_peak_7032	2	15082995	15084432	+	242	NA	exon (AT2G35930.1, exon 1 of 1)	exon (AT2G35930.1, exon 1 of 1)	360	AT2G35935.1	28718330		NM_001336583		AT2G35935	-	hypothetical protein	protein-coding
merged_clf_H3K9_q_0.05_with_ctrl.peaks_peak_3408	1	21887793	21888548	+	242	NA	exon (AT1G59590.1, exon 1 of 1)	exon (AT1G59590.1, exon 1 of 1)	582	AT1G59590.1	842249	At.453	NM_104652		ZCF37	T30E16.15|T30E16_15	ZCF37	protein-coding
merged_clf_H3K9_q_0.05_with_ctrl.peaks_peak_5441	2	2587168	2588292	+	242	NA	TTS (AT2G06520.1)	TTS (AT2G06520.1)	718	AT2G06520.1	815210	At.20999	NM_126649		PSBX	PSII-X|T12H3.7|T12H3_7|photosystem II subunit X	photosystem II subunit X	protein-coding
merged_clf_H3K9_q_0.05_with_ctrl.peaks_peak_6745	2	13674516	13675159	+	241	NA	exon (AT2G32190.1, exon 2 of 3)	exon (AT2G32190.1, exon 2 of 3)	439	AT2G32190.1	817778	At.38112	NM_128778		AT2G32190	F22D22.6|F22D22_6	cysteine-rich/transmembrane domain A-like protein	protein-coding
merged_clf_H3K9_q_0.05_with_ctrl.peaks_peak_4189	1	26472685	26474727	+	241	NA	exon (AT1G70290.1, exon 2 of 4)	exon (AT1G70290.1, exon 2 of 4)	1080	AT1G70290.2	843365	At.27738	NM_105697		TPS8	ATTPS8|ATTPSC|F17O7.18|F17O7_18|trehalose-6-phosphatase synthase S8	trehalose-6-phosphatase synthase S8	protein-coding
merged_clf_H3K9_q_0.05_with_ctrl.peaks_peak_2715	1	17265864	17266498	+	241	NA	exon (AT1G46768.3, exon 1 of 2)	exon (AT1G46768.3, exon 1 of 2)	543	AT1G46768.2	841117	At.28676	NM_103607		RAP2.1	F2G19.32|F2G19_32|related to AP2 1	related to AP2 1	protein-coding
merged_clf_H3K9_q_0.05_with_ctrl.peaks_peak_4125	1	26239963	26240667	+	241	NA	exon (AT1G69760.1, exon 1 of 1)	exon (AT1G69760.1, exon 1 of 1)	528	AT1G69760.1	843312	At.46680	NM_105644		AT1G69760	T6C23.4|T6C23_4	suppressor SRP40-like protein	protein-coding
merged_clf_H3K9_q_0.05_with_ctrl.peaks_peak_12295	4	5036919	5037297	+	241	NA	Intergenic	Intergenic	-16622	ENSRNA049758002-T1
merged_clf_H3K9_q_0.05_with_ctrl.peaks_peak_6609	2	12972922	12974307	+	241	NA	exon (AT2G30440.1, exon 1 of 6)	exon (AT2G30440.1, exon 1 of 6)	932	AT2G30440.1	817595	At.10032	NM_128597		TPP	Plsp2B|T6B20.20|T6B20_20|plastidic type I signal peptidase 2B|thylakoid processing peptide	thylakoid processing peptide	protein-coding
merged_clf_H3K9_q_0.05_with_ctrl.peaks_peak_5345	2	1264248	1264760	+	241	NA	Intergenic	Intergenic	3687	AT2G03980.1	814924	At.42977	NM_126435		AT2G03980	F3C11.9|F3C11_9	GDSL-like Lipase/Acylhydrolase superfamily protein	protein-coding
merged_clf_H3K9_q_0.05_with_ctrl.peaks_peak_332	1	1431474	1432755	+	241	NA	exon (AT1G05010.1, exon 3 of 4)	exon (AT1G05010.1, exon 3 of 4)	896	AT1G05010.1	839345	At.23109	NM_100380		EFE	1-AMINOCYCLOPROPANE-1-CARBOXYLATE OXIDASE|ACO4|EAT1|ETHYLENE-FORMING ENZYME|T7A14.12|T7A14_12|ethylene forming enzyme|ethylene-forming enzyme	ethylene-forming enzyme	protein-coding
merged_clf_H3K9_q_0.05_with_ctrl.peaks_peak_1625	1	7143061	7146410	+	241	NA	exon (AT1G20620.1, exon 3 of 7)	exon (AT1G20620.1, exon 3 of 7)	930	AT1G20620.7	838651	At.24821	NM_101913		CAT3	ATCAT3|F5M15.5|F5M15_5|SEN2|SENESCENCE 2|catalase 3	catalase 3	protein-coding
merged_clf_H3K9_q_0.05_with_ctrl.peaks_peak_16084	5	5265852	5266921	+	241	NA	intron (AT5G16120.2, intron 3 of 8)	intron (AT5G16120.2, intron 3 of 8)	753	AT5G16120.2	831469	At.23932	NM_121617		AT5G16120	T21H19.40|T21H19_40	alpha/beta-Hydrolases superfamily protein	protein-coding
merged_clf_H3K9_q_0.05_with_ctrl.peaks_peak_13324	4	11660065	11660850	+	241	NA	intron (AT4G22000.1, intron 1 of 1)	intron (AT4G22000.1, intron 1 of 1)	462	AT4G22000.1	828289	At.27313	NM_118321		AT4G22000	F1N20.100|F1N20_100	tyrosine sulfotransferase-like protein	protein-coding
merged_clf_H3K9_q_0.05_with_ctrl.peaks_peak_18510	5	23384487	23387331	+	241	NA	exon (AT5G57710.1, exon 1 of 4)	exon (AT5G57710.1, exon 1 of 4)	1654	AT5G57710.1	835878	At.40639	NM_125154		AT5G57710	MRI1.7|MRI1_7|SMAX1|SUPPRESSOR OF MAX2 1	Double Clp-N motif-containing P-loop nucleoside triphosphate hydrolases superfamily protein	protein-coding
merged_clf_H3K9_q_0.05_with_ctrl.peaks_peak_10976	3	19425830	19427096	+	241	NA	exon (AT3G52400.1, exon 1 of 2)	exon (AT3G52400.1, exon 1 of 2)	767	AT3G52400.1	824405	At.479	NM_115100		SYP122	ATSYP122|syntaxin of plants 122	syntaxin of plants 122	protein-coding
merged_clf_H3K9_q_0.05_with_ctrl.peaks_peak_13148	4	10606473	10606859	+	241	NA	exon (AT4G19450.2, exon 1 of 2)	exon (AT4G19450.2, exon 1 of 2)	255	AT4G19450.2	827686	At.28176	NM_118065		AT4G19450	T5K18.230|T5K18_230	Major facilitator superfamily protein	protein-coding
merged_clf_H3K9_q_0.05_with_ctrl.peaks_peak_7385	2	16772150	16773654	+	241	NA	exon (AT2G40140.1, exon 2 of 2)	exon (AT2G40140.1, exon 2 of 2)	699	AT2G40140.2	818605	At.27663	NM_129572		CZF1	(SALT-INDUCIBLE ZINC FINGER 2|ATSZF2|SZF2|T7M7.3|T7M7_3|ZFAR1	zinc finger (CCCH-type) family protein	protein-coding
merged_clf_H3K9_q_0.05_with_ctrl.peaks_peak_14981	5	269192	270466	+	241	NA	exon (AT5G01720.1, exon 1 of 8)	exon (AT5G01720.1, exon 1 of 8)	817	AT5G01720.1	831688	At.24859	NM_120250		AT5G01720	F7A7.240|F7A7_240	RNI-like superfamily protein	protein-coding
merged_clf_H3K9_q_0.05_with_ctrl.peaks_peak_11685	3	22741522	22742289	+	241	NA	exon (AT3G61460.1, exon 1 of 1)	exon (AT3G61460.1, exon 1 of 1)	867	AT3G61460.1	825319	At.942	NM_116011		BRH1	brassinosteroid-responsive RING-H2	brassinosteroid-responsive RING-H2	protein-coding
merged_clf_H3K9_q_0.05_with_ctrl.peaks_peak_17470	5	17642435	17643773	+	241	NA	exon (AT5G43880.4, exon 1 of 6)	exon (AT5G43880.4, exon 1 of 6)	876	AT5G43880.2	834410	At.30096	NM_123755		TRM21	F6B6.2|F6B6_2|TON1 Recruiting Motif 21	methyl-coenzyme M reductase II subunit gamma, putative (DUF3741)	protein-coding
merged_clf_H3K9_q_0.05_with_ctrl.peaks_peak_14886	4	18515882	18516693	+	241	NA	TTS (AT4G39917.1)	TTS (AT4G39917.1)	594	AT4G39920.1	830151	At.43301	NM_120155		POR	PORCINO|T5J17.90|T5J17_90|TFC C|TUBULIN-FOLDING COFACTOR C	C-CAP/cofactor C-like domain-containing protein	protein-coding
merged_clf_H3K9_q_0.05_with_ctrl.peaks_peak_11389	3	21297131	21299482	+	241	NA	exon (AT3G57530.1, exon 3 of 8)	exon (AT3G57530.1, exon 3 of 8)	1383	AT3G57530.2	824920	At.43700	NM_115613		CPK32	ATCPK32|CDPK32|calcium-dependent protein kinase 32	calcium-dependent protein kinase 32	protein-coding
merged_clf_H3K9_q_0.05_with_ctrl.peaks_peak_3134	1	20135235	20136515	+	241	NA	exon (AT1G53910.2, exon 2 of 3)	exon (AT1G53910.2, exon 2 of 3)	763	AT1G53910.3	841829	At.20952	NM_104269		RAP2.12	T18A20.14|T18A20_14|related to AP2 12	related to AP2 12	protein-coding
merged_clf_H3K9_q_0.05_with_ctrl.peaks_peak_10286	3	10940592	10941730	+	241	NA	exon (AT3G28920.1, exon 1 of 1)	exon (AT3G28920.1, exon 1 of 1)	672	AT3G28920.1	822527	At.19633	NM_113813		HB34	AtHB34|ZHD9|ZINC FINGER HOMEODOMAIN 9|homeobox protein 34	homeobox protein 34	protein-coding
merged_clf_H3K9_q_0.05_with_ctrl.peaks_peak_14392	4	16500438	16501049	+	240	NA	TTS (AT4G34530.1)	TTS (AT4G34530.1)	-1789	AT4G34550.1	829606	At.31494	NM_119620		AT4G34550	T4L20.130|T4L20_130	F-box protein	protein-coding
merged_clf_H3K9_q_0.05_with_ctrl.peaks_peak_15853	5	4218917	4220226	+	240	NA	promoter-TSS (AT5G02045.1)	promoter-TSS (AT5G02045.1)	-715	AT5G02045.1	28720435		NR_142567		AT5G02045	-	ncRNA	ncRNA
merged_clf_H3K9_q_0.05_with_ctrl.peaks_peak_1733	1	7661431	7662600	+	240	NA	intron (AT1G21830.1, intron 1 of 1)	intron (AT1G21830.1, intron 1 of 1)	710	AT1G21830.1	838785	At.11474	NM_102031		AT1G21830	AT1G21820|T26F17.4	hypothetical protein	protein-coding
merged_clf_H3K9_q_0.05_with_ctrl.peaks_peak_3109	1	19987267	19988410	+	240	NA	intron (AT1G53570.2, intron 1 of 10)	intron (AT1G53570.2, intron 1 of 10)	647	AT1G53570.4	841792	At.21129	NM_104235		MAP3KA	F22G10.18|MAP KINASE KINASE KINASE 3|MAPKKK3|MEK KINASE|mitogen-activated protein kinase kinase kinase 3	mitogen-activated protein kinase kinase kinase 3	protein-coding
merged_clf_H3K9_q_0.05_with_ctrl.peaks_peak_7453	2	17113871	17114778	+	240	NA	TTS (AT2G41000.1)	TTS (AT2G41000.1)	723	AT2G41010.1	818701	At.19612	NM_129666		CAMBP25	ATCAMBP25|T3K9.22|T3K9_22|calmodulin (CAM)-binding protein of 25 kDa	calmodulin (CAM)-binding protein of 25 kDa	protein-coding
merged_clf_H3K9_q_0.05_with_ctrl.peaks_peak_11496	3	21828352	21830409	+	240	NA	exon (AT3G59060.2, exon 3 of 6)	exon (AT3G59060.2, exon 3 of 6)	827	AT3G59060.3	825075	At.43437	NM_115768		PIL6	PHYTOCHROME-INTERACTING FACTOR 5|PIF5|phytochrome interacting factor 3-like 6	phytochrome interacting factor 3-like 6	protein-coding
merged_clf_H3K9_q_0.05_with_ctrl.peaks_peak_15581	5	2938367	2939273	+	240	NA	exon (AT5G09440.1, exon 1 of 1)	exon (AT5G09440.1, exon 1 of 1)	627	AT5G09440.1	830803	At.24839	NM_120981		EXL4	EXORDIUM like 4|T5E8.240|T5E8_240	EXORDIUM like 4	protein-coding
merged_clf_H3K9_q_0.05_with_ctrl.peaks_peak_19333	5	26710600	26711712	+	240	NA	promoter-TSS (AT5G09785.1)	promoter-TSS (AT5G09785.1)	73	AT5G09785.1	28721129		NR_143237		AT5G09785	-	ncRNA	ncRNA
merged_clf_H3K9_q_0.05_with_ctrl.peaks_peak_5005	1	29975737	29976554	+	240	NA	promoter-TSS (AT1G79650.3)	promoter-TSS (AT1G79650.3)	173	AT1G09897.1	28717200		NR_139718		AT1G09897	-	ncRNA	ncRNA
merged_clf_H3K9_q_0.05_with_ctrl.peaks_peak_16755	5	8736279	8738112	+	240	NA	exon (AT5G25220.1, exon 2 of 6)	exon (AT5G25220.1, exon 2 of 6)	1121	AT5G25220.2	832593	At.5376	NM_122431		KNAT3	F21J6.18|F21J6_18|KNAT3 HOMEOBOX PROTEIN|KNOTTED1-like homeobox gene 3	homeobox protein knotted-1-like 3	protein-coding
merged_clf_H3K9_q_0.05_with_ctrl.peaks_peak_11253	3	20754770	20756421	+	240	NA	exon (AT3G55950.1, exon 1 of 1)	exon (AT3G55950.1, exon 1 of 1)	1095	AT3G55950.1	824761	At.34973	NM_115453		CCR3	ATCRR3|CRINKLY4 related 3	CRINKLY4 related 3	protein-coding
merged_clf_H3K9_q_0.05_with_ctrl.peaks_peak_12068	4	1038100	1039245	+	240	NA	exon (AT4G02350.1, exon 1 of 3)	exon (AT4G02350.1, exon 1 of 3)	558	AT4G02350.2	828060	At.34308	NM_116468		SEC15B	T14P8.16|T14P8_16|exocyst complex component sec15B	exocyst complex component sec15B	protein-coding
merged_clf_H3K9_q_0.05_with_ctrl.peaks_peak_8647	3	2384610	2385682	+	240	NA	intron (AT3G07460.2, intron 1 of 1)	intron (AT3G07460.2, intron 1 of 1)	567	AT3G07460.2	819934	At.44908	NM_148697		AT3G07460	-	transmembrane protein, putative (Protein of unknown function, DUF538)	protein-coding
merged_clf_H3K9_q_0.05_with_ctrl.peaks_peak_1883	1	8385308	8386458	+	240	NA	exon (AT1G23710.1, exon 1 of 1)	exon (AT1G23710.1, exon 1 of 1)	695	AT1G23710.1	838981	At.10942	NM_102219		AT1G23710	F5O8.26|F5O8_26	hypothetical protein (DUF1645)	protein-coding
merged_clf_H3K9_q_0.05_with_ctrl.peaks_peak_9294	3	5177853	5178625	+	240	NA	TTS (AT3G15351.7)	TTS (AT3G15351.7)	428	AT3G15358.1	2745884	At.46974	NM_202591		AT3G15358	-	transmembrane protein	protein-coding
merged_clf_H3K9_q_0.05_with_ctrl.peaks_peak_10574	3	17360896	17362031	+	240	NA	exon (AT3G47160.3, exon 2 of 5)	exon (AT3G47160.3, exon 2 of 5)	655	AT3G47160.3	823869	At.43855	NM_114583		AT3G47160	-	RING/U-box superfamily protein	protein-coding
merged_clf_H3K9_q_0.05_with_ctrl.peaks_peak_15752	5	3695980	3696330	+	240	NA	exon (AT5G11530.3, exon 1 of 7)	exon (AT5G11530.3, exon 1 of 7)	332	AT5G11530.3	831025	At.43396	NM_121191		EMF1	F15N18.120|F15N18_120|embryonic flower 1	embryonic flower 1 (EMF1)	protein-coding
merged_clf_H3K9_q_0.05_with_ctrl.peaks_peak_8353	3	1167304	1167929	+	240	NA	exon (AT3G04400.2, exon 2 of 4)	exon (AT3G04400.2, exon 2 of 4)	310	AT3G04400.2	819595	At.11034	NM_111311		emb2171	T27C4.4|T27C4_4|embryo defective 2171	Ribosomal protein L14p/L23e family protein	protein-coding
merged_clf_H3K9_q_0.05_with_ctrl.peaks_peak_251	1	1008549	1008895	+	240	NA	promoter-TSS (AT1G04227.1)	promoter-TSS (AT1G04227.1)	-87	ENSRNA049495701-T1
merged_clf_H3K9_q_0.05_with_ctrl.peaks_peak_18611	5	23744914	23745442	+	240	NA	TTS (AT5G58800.1)	TTS (AT5G58800.1)	302	AT5G58790.1	835996	At.27481	NM_001161314		AT5G58790	MZN1.28	hypothetical protein	protein-coding
merged_clf_H3K9_q_0.05_with_ctrl.peaks_peak_15652	5	3285138	3286286	+	240	NA	intron (AT5G10450.3, intron 1 of 2)	intron (AT5G10450.3, intron 1 of 2)	635	AT5G10450.3	830909	At.24269	NM_121083		GRF6	14-3-3 PROTEIN G-BOX FACTOR14 LAMBDA|14-3-3LAMBDA|14-3-3lambda|AFT1|F12B17.200|F12B17_200|G-box regulating factor 6|GF14 LAMBDA	G-box regulating factor 6	protein-coding
merged_clf_H3K9_q_0.05_with_ctrl.peaks_peak_18084	5	21213065	21214066	+	240	NA	intron (AT5G52240.2, intron 1 of 2)	intron (AT5G52240.2, intron 1 of 2)	585	AT5G52240.2	835300	At.21163	NM_124603		MSBP1	ARABIDOPSIS THALIANA MEMBRANE-ASSOCIATED PROGESTERONE BINDING PROTEIN 5|ATMP1|AtMAPR5|F17P19.14|F17P19_14|membrane steroid binding protein 1	membrane steroid binding protein 1	protein-coding
merged_clf_H3K9_q_0.05_with_ctrl.peaks_peak_13578	4	12918342	12919226	+	240	NA	TTS (AT4G25200.1)	TTS (AT4G25200.1)	562	AT4G25210.1	828624	At.2577	NM_118653		AT4G25210	F24A6.50|F24A6_50	DNA-binding storekeeper protein-related transcriptional regulator	protein-coding
merged_clf_H3K9_q_0.05_with_ctrl.peaks_peak_15754	5	3708318	3708888	+	240	NA	TTS (AT5G11560.1)	TTS (AT5G11560.1)	800	AT5G11550.1	831027	At.32242	NM_121193		AT5G11550	F15N18.140|F15N18_140	ARM repeat superfamily protein	protein-coding
merged_clf_H3K9_q_0.05_with_ctrl.peaks_peak_6723	2	13612986	13613562	+	240	NA	TTS (AT2G31985.1)	TTS (AT2G31985.1)	299	AT2G31990.1	817758	At.38132	NM_128759		AT2G31990	F22D22.26|F22D22_26	Exostosin family protein	protein-coding
merged_clf_H3K9_q_0.05_with_ctrl.peaks_peak_4084	1	26039217	26040527	+	240	NA	TTS (AT1G69270.1)	TTS (AT1G69270.1)	967	AT1G69260.1	843257	At.16506	NM_105593		AFP1	ABI five binding protein|F4N2.22|F4N2_22	ABI five binding protein	protein-coding
merged_clf_H3K9_q_0.05_with_ctrl.peaks_peak_10423	3	16158439	16158759	+	239	NA	intron (AT3G44570.1, intron 1 of 3)	intron (AT3G44570.1, intron 1 of 3)	194	AT3G44570.1	823582	At.53728	NM_114325		AT3G44570	-	retrotransposon ORF-1 protein	protein-coding
merged_clf_H3K9_q_0.05_with_ctrl.peaks_peak_4373	1	27303381	27304630	+	239	NA	exon (AT1G72510.1, exon 2 of 2)	exon (AT1G72510.1, exon 2 of 2)	639	AT1G72510.1	843583	At.23983	NM_105910		AT1G72510	T10D10.2|T10D10_2	DUF1677 family protein (DUF1677)	protein-coding
merged_clf_H3K9_q_0.05_with_ctrl.peaks_peak_13991	4	14817642	14818864	+	239	NA	TTS (AT4G30270.1)	TTS (AT4G30270.1)	645	AT4G30260.3	829149	At.3685	NM_119172		AT4G30260	F9N11.110|F9N11_110|YIP4b|YPT/RAB GTPase Interacting Protein 4b	Integral membrane Yip1 family protein	protein-coding
merged_clf_H3K9_q_0.05_with_ctrl.peaks_peak_3649	1	23391382	23392785	+	239	NA	exon (AT1G63090.1, exon 2 of 3)	exon (AT1G63090.1, exon 2 of 3)	790	AT1G63090.1	842612	At.17747	NM_104987		PP2-A11	AtPP2-A11|F16M19.16|F16M19_16|phloem protein 2-A11	phloem protein 2-A11	protein-coding
merged_clf_H3K9_q_0.05_with_ctrl.peaks_peak_11619	3	22435141	22435916	+	239	NA	exon (AT3G60690.1, exon 1 of 1)	exon (AT3G60690.1, exon 1 of 1)	664	AT3G60690.1	825240	At.20817	NM_115933		AT3G60690	SAUR59|SMALL AUXIN UPREGULATED RNA 59	SAUR-like auxin-responsive protein family	protein-coding
merged_clf_H3K9_q_0.05_with_ctrl.peaks_peak_18804	5	24725183	24726652	+	239	NA	exon (AT5G61480.1, exon 1 of 2)	exon (AT5G61480.1, exon 1 of 2)	2327	AT5G61480.1	836269	At.55662	NM_125541		PXY	MCI2.4|MCI2_4|PHLOEM INTERCALATED WITH XYLEM|TDIF receptor|TDR	Leucine-rich repeat protein kinase family protein	protein-coding
merged_clf_H3K9_q_0.05_with_ctrl.peaks_peak_4366	1	27274614	27276272	+	239	NA	intron (AT1G72450.1, intron 2 of 3)	intron (AT1G72450.1, intron 2 of 3)	874	AT1G72450.2	843577	At.25041	NM_105904		JAZ6	T10D10.8|T10D10_8|TIFY DOMAIN PROTEIN 11B|TIFY11B|jasmonate-zim-domain protein 6	jasmonate-zim-domain protein 6	protein-coding
merged_clf_H3K9_q_0.05_with_ctrl.peaks_peak_13210	4	11004583	11005201	+	239	NA	exon (AT4G20380.4, exon 2 of 8)	exon (AT4G20380.4, exon 2 of 8)	284	AT4G20380.4	827786	At.24187	NM_118157		LSD1	F9F13.30|F9F13_30|LESION SIMULATING DISEASE|LESION SIMULATING DISEASE 1	LSD1 zinc finger family protein	protein-coding
merged_clf_H3K9_q_0.05_with_ctrl.peaks_peak_14298	4	16136896	16137858	+	239	NA	promoter-TSS (AT4G33580.1)	promoter-TSS (AT4G33580.1)	628	AT4G33565.1	829496	At.31572	NM_119512		AT4G33565	-	RING/U-box superfamily protein	protein-coding
merged_clf_H3K9_q_0.05_with_ctrl.peaks_peak_9229	3	4908953	4909908	+	239	NA	intron (AT3G14595.1, intron 1 of 3)	intron (AT3G14595.1, intron 1 of 3)	699	AT3G14595.1	820686	At.39206	NM_112320		AT3G14595	-	Ribosomal protein L18ae family	protein-coding
merged_clf_H3K9_q_0.05_with_ctrl.peaks_peak_500	1	2192370	2193764	+	239	NA	TTS (AT1G07150.2)	TTS (AT1G07150.2)	769	AT1G07140.1	837225	At.22610	NM_100588		SIRANBP	F10K1.15|F10K1_15|RAN-BINDING PROTEIN SIRANBP	Pleckstrin homology (PH) domain superfamily protein	protein-coding
merged_clf_H3K9_q_0.05_with_ctrl.peaks_peak_11750	3	23039410	23040544	+	239	NA	exon (AT3G62260.3, exon 1 of 3)	exon (AT3G62260.3, exon 1 of 3)	593	AT3G62260.2	825399	At.43534	NM_116091		AT3G62260	-	Protein phosphatase 2C family protein	protein-coding
merged_clf_H3K9_q_0.05_with_ctrl.peaks_peak_11701	3	22805236	22806216	+	239	NA	exon (AT3G61630.1, exon 1 of 1)	exon (AT3G61630.1, exon 1 of 1)	728	AT3G61630.1	825336	At.34258	NM_116028		CRF6	cytokinin response factor 6	cytokinin response factor 6	protein-coding
merged_clf_H3K9_q_0.05_with_ctrl.peaks_peak_13380	4	11969542	11971180	+	239	NA	exon (AT4G22780.2, exon 3 of 7)	exon (AT4G22780.2, exon 3 of 7)	842	AT4G22780.1	828377	At.32498	NM_118407		ACR7	ACT domain repeat 7|T12H17.170|T12H17_170	ACT domain repeat 7	protein-coding
merged_clf_H3K9_q_0.05_with_ctrl.peaks_peak_16091	5	5289738	5290297	+	239	NA	TTS (AT5G16210.1)	TTS (AT5G16210.1)	398	AT5G16200.2	831478	At.49749	NM_121625		AT5G16200	T21H19.120|T21H19_120	50S ribosomal protein-like protein	protein-coding
merged_clf_H3K9_q_0.05_with_ctrl.peaks_peak_8577	3	2117295	2117958	+	239	NA	promoter-TSS (AT3G06710.1)	promoter-TSS (AT3G06710.1)	280	AT3G06700.2	819855	At.17413	NM_111550		AT3G06700	-	Ribosomal L29e protein family	protein-coding
merged_clf_H3K9_q_0.05_with_ctrl.peaks_peak_12535	4	7304442	7305012	+	239	NA	exon (AT4G12290.1, exon 1 of 4)	exon (AT4G12290.1, exon 1 of 4)	404	AT4G12290.2	826838	At.19654	NM_117299		AT4G12290	T4C9.130|T4C9_130	Copper amine oxidase family protein	protein-coding
merged_clf_H3K9_q_0.05_with_ctrl.peaks_peak_14165	4	15526571	15527789	+	239	NA	intron (AT4G32150.1, intron 1 of 3)	intron (AT4G32150.1, intron 1 of 3)	746	AT4G32150.1	829347	At.25445	NM_119367		VAMP711	ATVAMP711|F10N7.40|F10N7_40|vesicle-associated membrane protein 711	vesicle-associated membrane protein 711	protein-coding
merged_clf_H3K9_q_0.05_with_ctrl.peaks_peak_10496	3	16909888	16910788	+	239	NA	intron (AT3G46010.1, intron 1 of 2)	intron (AT3G46010.1, intron 1 of 2)	476	AT3G46010.2	823744	At.21187	NM_114470		ADF1	ATADF1|actin depolymerizing factor 1|atadf	actin depolymerizing factor 1	protein-coding
merged_clf_H3K9_q_0.05_with_ctrl.peaks_peak_13539	4	12724714	12725575	+	239	NA	exon (AT4G24660.2, exon 1 of 2)	exon (AT4G24660.2, exon 1 of 2)	493	AT4G24660.2	828568	At.2543	NM_118599		HB22	ATHB22|F22K18.140|F22K18_140|HOMEOBOX PROTEIN 22|MATERNAL EFFECT EMBRYO ARREST 68|MEE68|ZHD2|ZINC FINGER HOMEODOMAIN 2|homeobox protein 22	homeobox protein 22	protein-coding
merged_clf_H3K9_q_0.05_with_ctrl.peaks_peak_18467	5	23207384	23207855	+	239	NA	TTS (AT5G57300.3)	TTS (AT5G57300.3)	307	AT5G57290.2	835834	At.20208	NM_125111		AT5G57290	MJB24.10|MJB24_10	60S acidic ribosomal protein family	protein-coding
merged_clf_H3K9_q_0.05_with_ctrl.peaks_peak_18261	5	22232250	22232992	+	239	NA	exon (AT5G54720.1, exon 1 of 1)	exon (AT5G54720.1, exon 1 of 1)	328	AT5G54720.1	835561	At.29481	NM_124853		AT5G54720	K5F14.7|K5F14_7	Ankyrin repeat family protein	protein-coding
merged_clf_H3K9_q_0.05_with_ctrl.peaks_peak_2669	1	16837653	16838230	+	239	NA	exon (AT1G44350.1, exon 1 of 5)	exon (AT1G44350.1, exon 1 of 5)	621	AT1G44350.1	841026	At.28163	NM_103546		ILL6	IAA-leucine resistant (ILR)-like gene 6|T18F15.9|T18F15_9	IAA-amino acid hydrolase ILR1-like 6	protein-coding
merged_clf_H3K9_q_0.05_with_ctrl.peaks_peak_13741	4	13679683	13680809	+	239	NA	exon (AT4G27320.2, exon 1 of 2)	exon (AT4G27320.2, exon 1 of 2)	700	AT4G27320.1	828840	At.24337	NM_118866		PHOS34	ATPHOS34|M4I22.130|M4I22_130	Adenine nucleotide alpha hydrolases-like superfamily protein	protein-coding
merged_clf_H3K9_q_0.05_with_ctrl.peaks_peak_1935	1	8693227	8694157	+	239	NA	exon (AT1G24530.1, exon 1 of 1)	exon (AT1G24530.1, exon 1 of 1)	1062	AT1G24530.1	839068	At.15901	NM_102297		AT1G24530	F21J9.19	Transducin/WD40 repeat-like superfamily protein	protein-coding
merged_clf_H3K9_q_0.05_with_ctrl.peaks_peak_3906	1	24957525	24958093	+	239	NA	exon (AT1G66890.1, exon 1 of 1)	exon (AT1G66890.1, exon 1 of 1)	447	AT1G66890.1	843007	At.35720	NM_105360		AT1G66890	T4O24.4|T4O24_4	50S ribosomal-like protein	protein-coding
merged_clf_H3K9_q_0.05_with_ctrl.peaks_peak_4354	1	27236935	27237622	+	239	NA	TTS (AT1G72330.3)	TTS (AT1G72330.3)	413	AT1G72340.3	843566	At.18244	NM_105893		AT1G72340	T10D10.19|T10D10_19	NagB/RpiA/CoA transferase-like superfamily protein	protein-coding
merged_clf_H3K9_q_0.05_with_ctrl.peaks_peak_8502	3	1776014	1776621	+	239	NA	TTS (AT3G05940.1)	TTS (AT3G05940.1)	523	AT3G05937.1	2745871	At.49592	NM_202504		AT3G05937	-	hypothetical protein	protein-coding
merged_clf_H3K9_q_0.05_with_ctrl.peaks_peak_8303	3	939996	940609	+	238	NA	exon (AT3G03740.1, exon 1 of 4)	exon (AT3G03740.1, exon 1 of 4)	350	AT3G03750.1	821169	At.40936	NM_111246		SDG20	F20H23.22|F20H23_22|SET domain protein 20|SUVR3	SET domain protein 20	protein-coding
merged_clf_H3K9_q_0.05_with_ctrl.peaks_peak_822	1	3681854	3683017	+	238	NA	exon (AT1G11050.1, exon 1 of 1)	exon (AT1G11050.1, exon 1 of 1)	756	AT1G11050.1	837646	At.42154	NM_100978		AT1G11050	T19D16.6|T19D16_6	Protein kinase superfamily protein	protein-coding
merged_clf_H3K9_q_0.05_with_ctrl.peaks_peak_4087	1	26051032	26051923	+	238	NA	exon (AT1G69295.2, exon 2 of 4)	exon (AT1G69295.2, exon 2 of 4)	1090	AT1G69295.1	843261	At.21446	NM_105597		PDCB4	plasmodesmata callose-binding protein 4	plasmodesmata callose-binding protein 4	protein-coding
merged_clf_H3K9_q_0.05_with_ctrl.peaks_peak_4298	1	26976190	26976803	+	238	NA	exon (AT1G71710.2, exon 3 of 10)	exon (AT1G71710.2, exon 3 of 10)	504	AT1G71710.1	843501	At.12019	NM_105829		AT1G71710	F14O23.9|F14O23_9	DNAse I-like superfamily protein	protein-coding
merged_clf_H3K9_q_0.05_with_ctrl.peaks_peak_1611	1	7084560	7085685	+	238	NA	exon (AT1G20440.1, exon 2 of 2)	exon (AT1G20440.1, exon 2 of 2)	-1212	AT1G20430.1	838631	At.26156	NM_101893		AT1G20430	F5M15.30|F5M15_30	hypothetical protein	protein-coding
merged_clf_H3K9_q_0.05_with_ctrl.peaks_peak_6409	2	11776525	11777437	+	238	NA	TTS (AT2G27590.1)	TTS (AT2G27590.1)	548	AT2G27580.2	817304	At.43983	NM_128317		AT2G27580	F10A12.25|F10A12_25	A20/AN1-like zinc finger family protein	protein-coding
merged_clf_H3K9_q_0.05_with_ctrl.peaks_peak_16319	5	6423279	6425462	+	238	NA	promoter-TSS (AT5G19140.3)	promoter-TSS (AT5G19140.3)	-409	AT5G19140.3	832034	At.22240	NM_121919		AILP1	ATAILP1|T24G5.40|T24G5_40	aluminum induced protein with YGL and LRDR motifs	protein-coding
merged_clf_H3K9_q_0.05_with_ctrl.peaks_peak_14164	4	15524538	15525392	+	238	NA	intron (AT4G32140.1, intron 1 of 7)	intron (AT4G32140.1, intron 1 of 7)	571	AT4G32140.1	829346	At.1877	NM_119366		AT4G32140	F10N7.50|F10N7_50	EamA-like transporter family	protein-coding
merged_clf_H3K9_q_0.05_with_ctrl.peaks_peak_14578	4	17311126	17312492	+	238	NA	promoter-TSS (AT4G09375.1)	promoter-TSS (AT4G09375.1)	40	AT4G09375.1	28720066		NR_142275		AT4G09375	-	ncRNA	ncRNA
merged_clf_H3K9_q_0.05_with_ctrl.peaks_peak_13681	4	13395461	13398060	+	238	NA	exon (AT4G26540.1, exon 1 of 2)	exon (AT4G26540.1, exon 1 of 2)	1345	AT4G26542.1	10723129		NR_142358		AT4G26542	-	ncRNA	ncRNA
merged_clf_H3K9_q_0.05_with_ctrl.peaks_peak_18835	5	24858628	24859250	+	238	NA	TTS (AT5G61910.3)	TTS (AT5G61910.3)	333	AT5G61900.3	836311	At.20314	NM_125583		BON1	BON|BONZAI 1|COPINE 1|CPN1|K22G18.2|K22G18_2	Calcium-dependent phospholipid-binding Copine family protein	protein-coding
merged_clf_H3K9_q_0.05_with_ctrl.peaks_peak_4061	1	25880353	25881893	+	238	NA	exon (AT1G68840.1, exon 1 of 1)	exon (AT1G68840.1, exon 1 of 1)	800	AT1G68840.2	843216	At.25344	NM_105558		RAV2	AtRAV2|EDF2|ETHYLENE RESPONSE DNA BINDING FACTOR 2|RAP2.8|RELATED TO AP2 8|T6L1.3|T6L1_3|TEM2|TEMPRANILLO 2|related to ABI3/VP1 2	related to ABI3/VP1 2	protein-coding
merged_clf_H3K9_q_0.05_with_ctrl.peaks_peak_19129	5	25932323	25933740	+	238	NA	intron (AT5G64880.1, intron 1 of 1)	intron (AT5G64880.1, intron 1 of 1)	929	AT5G64880.1	836611	At.27520	NM_125886		AT5G64880	MXK3.11|MXK3_11	transmembrane protein	protein-coding
merged_clf_H3K9_q_0.05_with_ctrl.peaks_peak_795	1	3549887	3550669	+	237	NA	exon (AT1G10690.1, exon 1 of 1)	exon (AT1G10690.1, exon 1 of 1)	570	AT1G10690.1	837612	At.43217	NM_100945		AT1G10690	T16B5.17|T16B5_17	cyclin-dependent kinase inhibitor	protein-coding
merged_clf_H3K9_q_0.05_with_ctrl.peaks_peak_2179	1	10045649	10046405	+	237	NA	exon (AT1G28580.2, exon 1 of 4)	exon (AT1G28580.2, exon 1 of 4)	525	AT1G28580.2	839758	At.19829	NM_102626		AT1G28580	F1K23.18|F1K23_18	GDSL-like Lipase/Acylhydrolase superfamily protein	protein-coding
merged_clf_H3K9_q_0.05_with_ctrl.peaks_peak_1540	1	6698081	6698890	+	237	NA	TTS (AT1G19376.1)	TTS (AT1G19376.1)	611	AT1G19380.1	838521	At.41752	NM_101795		AT1G19380	F18O14.10|F18O14_10	sugar, putative (DUF1195)	protein-coding
merged_clf_H3K9_q_0.05_with_ctrl.peaks_peak_17371	5	16973993	16974556	+	237	NA	exon (AT5G42440.1, exon 1 of 1)	exon (AT5G42440.1, exon 1 of 1)	603	AT5G42440.1	834250	At.30173	NM_123609		AT5G42440	MDH9.13|MDH9_13	Protein kinase superfamily protein	protein-coding
merged_clf_H3K9_q_0.05_with_ctrl.peaks_peak_2621	1	14158585	14160692	+	237	NA	exon (AT1G37130.1, exon 1 of 3)	exon (AT1G37130.1, exon 1 of 3)	1186	AT1G37130.1	840630	At.23731	NM_103364		NIA2	ARABIDOPSIS NITRATE REDUCTASE 2|ATNR2|B29|CHL3|CHLORATE RESISTANT 3|F28L22.2|F28L22_2|NIA2-1|NITRATE REDUCTASE|NITRATE REDUCTASE 2|NR|NR2|nitrate reductase 2	nitrate reductase 2	protein-coding
merged_clf_H3K9_q_0.05_with_ctrl.peaks_peak_2467	1	11928837	11930087	+	237	NA	exon (AT1G32920.1, exon 1 of 1)	exon (AT1G32920.1, exon 1 of 1)	705	AT1G32920.1	28717292	At.24163	NM_001333021		AT1G32920	F9L11.25|F9L11_25	hypothetical protein	protein-coding
merged_clf_H3K9_q_0.05_with_ctrl.peaks_peak_11317	3	21006940	21007567	+	237	NA	exon (AT3G56710.2, exon 2 of 2)	exon (AT3G56710.2, exon 2 of 2)	811	AT3G56710.1	824838	At.9832	NM_115530		SIB1	sigma factor binding protein 1	sigma factor binding protein 1	protein-coding
merged_clf_H3K9_q_0.05_with_ctrl.peaks_peak_7663	2	18049074	18049775	+	237	NA	TTS (AT2G43470.1)	TTS (AT2G43470.1)	355	AT2G43465.6	7922418	At.74539	NM_001161100		AT2G43465	-	RNA-binding ASCH domain protein	protein-coding
merged_clf_H3K9_q_0.05_with_ctrl.peaks_peak_19055	5	25703953	25705056	+	237	NA	exon (AT5G64260.1, exon 1 of 1)	exon (AT5G64260.1, exon 1 of 1)	855	AT5G64260.1	836547	At.23633	NM_125822		EXL2	EXORDIUM like 2|MSJ1_10	EXORDIUM like 2	protein-coding
merged_clf_H3K9_q_0.05_with_ctrl.peaks_peak_11297	3	20909764	20910461	+	237	NA	exon (AT3G56400.1, exon 1 of 3)	exon (AT3G56400.1, exon 1 of 3)	511	AT3G56400.1	824807	At.5242	NM_115498		WRKY70	ARABIDOPSIS THALIANA WRKY DNA-BINDING PROTEIN 70|ATWRKY70|WRKY DNA-binding protein 70	WRKY DNA-binding protein 70	protein-coding
merged_clf_H3K9_q_0.05_with_ctrl.peaks_peak_14101	4	15248477	15248940	+	237	NA	promoter-TSS (AT4G31420.1)	promoter-TSS (AT4G31420.1)	252	AT4G31430.3	829270	At.1858	NM_119292		AT4G31430	(Japanese for nucleus) 4|F3L17.8|KAKU4	flocculation protein	protein-coding
merged_clf_H3K9_q_0.05_with_ctrl.peaks_peak_10075	3	9470522	9470915	+	237	NA	promoter-TSS (AT3G25880.1)	promoter-TSS (AT3G25880.1)	321	AT3G25882.1	822184	At.6314	NM_148752		NIMIN-2	NIM1-interacting 2	NIM1-interacting 2	protein-coding
merged_clf_H3K9_q_0.05_with_ctrl.peaks_peak_3933	1	25189918	25190634	+	237	NA	TTS (AT1G67290.1)	TTS (AT1G67290.1)	418	AT1G67280.1	843048	At.22738	NM_105396		AT1G67280	F1N21.10	Glyoxalase/Bleomycin resistance protein/Dioxygenase superfamily protein	protein-coding
merged_clf_H3K9_q_0.05_with_ctrl.peaks_peak_14897	4	18557524	18558725	+	237	NA	promoter-TSS (AT4G40042.1)	promoter-TSS (AT4G40042.1)	619	AT4G40040.2	830165	At.6019	NM_179198		AT4G40040	H3.3|T5J17.210|histone 3.3	Histone superfamily protein	protein-coding
merged_clf_H3K9_q_0.05_with_ctrl.peaks_peak_4599	1	28185570	28186431	+	237	NA	TTS (AT1G09523.1)	TTS (AT1G09523.1)	496	AT1G75080.1	843845	At.17945	NM_106164		BZR1	BRASSINAZOLE-RESISTANT 1|F9E10.7|F9E10_7	Brassinosteroid signaling positive regulator (BZR1) family protein	protein-coding
merged_clf_H3K9_q_0.05_with_ctrl.peaks_peak_6661	2	13256222	13257024	+	237	NA	TTS (AT2G31100.1)	TTS (AT2G31100.1)	532	AT2G31090.1	817665	At.38263	NM_128665		AT2G31090	T16B12.10|T16B12_10	transmembrane protein	protein-coding
merged_clf_H3K9_q_0.05_with_ctrl.peaks_peak_6506	2	12431813	12432171	+	237	NA	exon (AT2G28950.1, exon 3 of 3)	exon (AT2G28950.1, exon 3 of 3)	-1392	AT2G08305.1	28717931		NR_140316		AT2G08305	-	ncRNA	ncRNA
merged_clf_H3K9_q_0.05_with_ctrl.peaks_peak_2717	1	17285058	17285637	+	237	NA	exon (AT1G47128.1, exon 1 of 5)	exon (AT1G47128.1, exon 1 of 5)	402	AT1G47128.1	841122	At.43549	NM_103612		RD21A	F2G19.31|F2G19_31|RD21|RESPONSIVE TO DEHYDRATION 21A|responsive to dehydration 21|responsive to dehydration 21A	Granulin repeat cysteine protease family protein	protein-coding
merged_clf_H3K9_q_0.05_with_ctrl.peaks_peak_15138	5	883535	884732	+	237	NA	intron (AT5G03520.2, intron 2 of 7)	intron (AT5G03520.2, intron 2 of 7)	670	AT5G03520.2	831817	At.4875	NM_120432		RAB8C	ARABIDOPSIS RAB HOMOLOG E1D|ATRAB-E1D|ATRAB8C|ATRABE1D|F12E4.300|F12E4_300|RAB GTPase homolog 8C|RAB HOMOLOG E1D|RAB-E1D	RAB GTPase homolog 8C	protein-coding
merged_clf_H3K9_q_0.05_with_ctrl.peaks_peak_7843	2	18786698	18788525	+	237	NA	exon (AT2G45590.1, exon 1 of 1)	exon (AT2G45590.1, exon 1 of 1)	1621	AT2G45590.1	819167	At.20541	NM_130121		AT2G45590	F17K2.12	Protein kinase superfamily protein	protein-coding
merged_clf_H3K9_q_0.05_with_ctrl.peaks_peak_4861	1	29364240	29366169	+	237	NA	exon (AT1G78080.1, exon 1 of 1)	exon (AT1G78080.1, exon 1 of 1)	1132	AT1G78080.1	844143	At.25524	NM_106457		RAP2.4	AtWIND1|F28K19.29|F28K19_29|WIND1|related to AP2 4|wound induced dedifferentiation 1	related to AP2 4	protein-coding
merged_clf_H3K9_q_0.05_with_ctrl.peaks_peak_19399	5	26937857	26938426	+	237	NA	TTS (AT5G67500.1)	TTS (AT5G67500.1)	357	AT5G67510.1	836887	At.28589	NM_126151		AT5G67510	K9I9.7|K9I9_7	Translation protein SH3-like family protein	protein-coding
merged_clf_H3K9_q_0.05_with_ctrl.peaks_peak_7216	2	16028910	16029427	+	237	NA	Intergenic	Intergenic	4001	AT2G38270.1	818407	At.25559	NM_129383		CXIP2	ATGRX2|AtGRXS16|CAX-interacting protein 2|F16M14.20|F16M14_20|GLUTAREDOXIN|GLUTAREDOXIN 2|glutaredoxin 16	CAX-interacting protein 2	protein-coding
merged_clf_H3K9_q_0.05_with_ctrl.peaks_peak_15369	5	1930947	1931749	+	236	NA	promoter-TSS (AT5G01255.1)	promoter-TSS (AT5G01255.1)	56	AT5G01255.1	28720368		NR_142492		AT5G01255	-	ncRNA	ncRNA
merged_clf_H3K9_q_0.05_with_ctrl.peaks_peak_3689	1	23668128	23669036	+	236	NA	TTS (AT1G63810.2)	TTS (AT1G63810.2)	543	AT1G63800.1	842683	At.43954	NM_105055		UBC5	T12P18.18|T12P18_18|ubiquitin-conjugating enzyme 5	ubiquitin-conjugating enzyme 5	protein-coding
merged_clf_H3K9_q_0.05_with_ctrl.peaks_peak_9	1	50395	51184	+	236	NA	intron (AT1G01100.4, intron 2 of 3)	intron (AT1G01100.4, intron 2 of 3)	319	AT1G01100.1	839410	At.11901	NM_099992		AT1G01100	T25K16.9|T25K16_9	60S acidic ribosomal protein family	protein-coding
merged_clf_H3K9_q_0.05_with_ctrl.peaks_peak_9928	3	8467582	8468222	+	236	NA	exon (AT3G23590.1, exon 1 of 12)	exon (AT3G23590.1, exon 1 of 12)	504	AT3G23590.1	821938	At.23102	NM_113262		RFR1	MED33A|REF4-related 1	REF4-related 1	protein-coding
merged_clf_H3K9_q_0.05_with_ctrl.peaks_peak_3713	1	23785251	23786577	+	236	NA	exon (AT1G64080.1, exon 1 of 2)	exon (AT1G64080.1, exon 1 of 2)	886	AT1G64080.1	842712	At.36050	NM_105081		MAKR2	F22C12.16|F22C12_16|MEMBRANE-ASSOCIATED KINASE REGULATOR 2	membrane-associated kinase regulator	protein-coding
merged_clf_H3K9_q_0.05_with_ctrl.peaks_peak_17717	5	19162950	19163736	+	236	NA	TTS (AT5G47190.1)	TTS (AT5G47190.1)	575	AT5G47180.2	834764	At.24799	NM_124089		AT5G47180	MQL5.3|MQL5_3	Plant VAMP (vesicle-associated membrane protein) family protein	protein-coding
merged_clf_H3K9_q_0.05_with_ctrl.peaks_peak_11868	4	97504	98208	+	236	NA	TTS (AT4G00230.2)	TTS (AT4G00230.2)	380	AT4G00231.1	826583	At.34586	NM_116241		MEE50	maternal effect embryo arrest 50	ARM repeat superfamily protein	protein-coding
merged_clf_H3K9_q_0.05_with_ctrl.peaks_peak_19380	5	26882692	26883367	+	236	NA	promoter-TSS (AT5G67385.2)	promoter-TSS (AT5G67385.2)	391	AT5G67380.2	836873	At.24323	NM_126138		CKA1	ATCKA1|ATPK12D|K8K14.10|K8K14_10|casein kinase alpha 1	casein kinase alpha 1	protein-coding
merged_clf_H3K9_q_0.05_with_ctrl.peaks_peak_16395	5	6774318	6775568	+	236	NA	exon (AT5G20050.1, exon 1 of 1)	exon (AT5G20050.1, exon 1 of 1)	841	AT5G20050.1	832127	At.21169	NM_122012		AT5G20050	F28I16.200|F28I16_200	Protein kinase superfamily protein	protein-coding
merged_clf_H3K9_q_0.05_with_ctrl.peaks_peak_18878	5	25037480	25038237	+	236	NA	exon (AT5G62350.1, exon 1 of 1)	exon (AT5G62350.1, exon 1 of 1)	667	AT5G62350.1	836356	At.8941	NM_125629		AT5G62350	MMI9.21|MMI9_21	Plant invertase/pectin methylesterase inhibitor superfamily protein	protein-coding
merged_clf_H3K9_q_0.05_with_ctrl.peaks_peak_533	1	2349083	2350656	+	236	NA	exon (AT1G07630.1, exon 1 of 4)	exon (AT1G07630.1, exon 1 of 4)	954	AT1G07630.1	837276	At.43724	NM_100636		PLL5	F24B9.31|F24B9_31|pol-like 5	pol-like 5	protein-coding
merged_clf_H3K9_q_0.05_with_ctrl.peaks_peak_18745	5	24413999	24415048	+	236	NA	intron (AT5G60710.1, intron 1 of 1)	intron (AT5G60710.1, intron 1 of 1)	622	AT5G60710.1	836192	At.21965	NM_125464		AT5G60710	MUP24.2|MUP24_2	Zinc finger (C3HC4-type RING finger) family protein	protein-coding
merged_clf_H3K9_q_0.05_with_ctrl.peaks_peak_5664	2	7580720	7581231	+	236	NA	Intergenic	Intergenic	-3129	AT2G17450.1	816251	At.25384	NM_127300		RHA3A	F5J6.22|RING-H2 FINGER PROTEIN RHA3A|RING-H2 finger A3A	RING-H2 finger A3A	protein-coding
merged_clf_H3K9_q_0.05_with_ctrl.peaks_peak_5206	2	324487	325349	+	236	NA	TTS (AT2G01730.1)	TTS (AT2G01730.1)	553	AT2G01735.1	814703	At.47033	NM_179593		RIE1	RING-finger protein for embryogenesis	RING-finger protein for embryogenesi	protein-coding
merged_clf_H3K9_q_0.05_with_ctrl.peaks_peak_4219	1	26616366	26617131	+	236	NA	TTS (AT1G70580.4)	TTS (AT1G70580.4)	481	AT1G70581.1	6241359		NR_143598		AT1G70581	-	ncRNA	ncRNA
merged_clf_H3K9_q_0.05_with_ctrl.peaks_peak_3874	1	24748256	24749625	+	236	NA	exon (AT1G66350.1, exon 1 of 1)	exon (AT1G66350.1, exon 1 of 1)	835	AT1G66350.1	842953	At.26400	NM_105306		RGL1	RGA-like 1|RGL|T27F4.10|T27F4_10	RGA-like 1	protein-coding
merged_clf_H3K9_q_0.05_with_ctrl.peaks_peak_6210	2	10734020	10734768	+	236	NA	intron (AT2G25190.1, intron 1 of 2)	intron (AT2G25190.1, intron 1 of 2)	473	AT2G25190.1	817057	At.14335	NM_128076		AT2G25190	F13D4.5	PPPDE putative thiol peptidase family protein	protein-coding
merged_clf_H3K9_q_0.05_with_ctrl.peaks_peak_12032	4	842647	843403	+	236	NA	TTS (AT4G01935.1)	TTS (AT4G01935.1)	368	AT4G04035.1	28719534		NR_141770		AT4G04035	-	ncRNA	ncRNA
merged_clf_H3K9_q_0.05_with_ctrl.peaks_peak_14325	4	16266063	16266891	+	235	NA	intron (AT4G33940.1, intron 1 of 4)	intron (AT4G33940.1, intron 1 of 4)	458	AT4G33940.1	829539	At.31536	NM_119554		AT4G33940	F17I5.1	RING/U-box superfamily protein	protein-coding
merged_clf_H3K9_q_0.05_with_ctrl.peaks_peak_15784	5	3831729	3832784	+	235	NA	exon (AT5G11890.1, exon 1 of 1)	exon (AT5G11890.1, exon 1 of 1)	756	AT5G11890.1	831062	At.28027	NM_121227		EMB3135	EMBRYO DEFECTIVE 3135|F14F18.60|F14F18_60	harpin-induced protein	protein-coding
merged_clf_H3K9_q_0.05_with_ctrl.peaks_peak_18692	5	24140211	24141079	+	235	NA	promoter-TSS (ENSRNA049492664-T1)	promoter-TSS (ENSRNA049492664-T1)	450	AT5G59950.3	836117	At.23634	NM_125388		AT5G59950	MMN10.26|MMN10_26	RNA-binding (RRM/RBD/RNP motifs) family protein	protein-coding
merged_clf_H3K9_q_0.05_with_ctrl.peaks_peak_13427	4	12192118	12192718	+	235	NA	promoter-TSS (AT4G23320.2)	promoter-TSS (AT4G23320.2)	303	AT4G23330.1	828432	At.28532	NM_118462		AT4G23330	F16G20.30	hypothetical protein	protein-coding
merged_clf_H3K9_q_0.05_with_ctrl.peaks_peak_18646	5	23961618	23962630	+	235	NA	intron (AT5G59420.1, intron 1 of 9)	intron (AT5G59420.1, intron 1 of 9)	557	AT5G59420.1	836061	At.24458	NM_125333		ORP3C	F2O15.17|F2O15_17|OSBP(oxysterol binding protein)-related protein 3C	OSBP(oxysterol binding protein)-related protein 3C	protein-coding
merged_clf_H3K9_q_0.05_with_ctrl.peaks_peak_4753	1	28865533	28867887	+	235	NA	exon (AT1G76878.1, exon 1 of 1)	exon (AT1G76878.1, exon 1 of 1)	1396	AT1G76880.1	844023	At.43159	NM_106339		AT1G76880	F7O12.5|F7O12_5	Duplicated homeodomain-like superfamily protein	protein-coding
merged_clf_H3K9_q_0.05_with_ctrl.peaks_peak_12463	4	6803598	6804285	+	235	NA	intron (AT4G11160.2, intron 1 of 7)	intron (AT4G11160.2, intron 1 of 7)	404	AT4G11160.3	826717	At.3295	NM_117186		AT4G11160	T22B4.140|T22B4_140	Translation initiation factor 2, small GTP-binding protein	protein-coding
merged_clf_H3K9_q_0.05_with_ctrl.peaks_peak_4680	1	28548029	28549377	+	235	NA	intron (AT1G76080.1, intron 1 of 1)	intron (AT1G76080.1, intron 1 of 1)	883	AT1G76080.1	843940	At.16596	NM_106257		CDSP32	ARABIDOPSIS THALIANA CHLOROPLASTIC DROUGHT-INDUCED STRESS PROTEIN OF 32 KD|ATCDSP32|T23E18.2|T23E18_2|chloroplastic drought-induced stress protein of 32 kD	chloroplastic drought-induced stress protein of 32 kD	protein-coding
merged_clf_H3K9_q_0.05_with_ctrl.peaks_peak_11379	3	21261929	21263187	+	235	NA	TTS (AT3G57460.1)	TTS (AT3G57460.1)	1512	AT3G57450.1	28719408	At.34830	NM_001339868		AT3G57450	-	hypothetical protein	protein-coding
merged_clf_H3K9_q_0.05_with_ctrl.peaks_peak_17135	5	15501310	15502176	+	235	NA	exon (AT5G38710.2, exon 1 of 3)	exon (AT5G38710.2, exon 1 of 3)	559	AT5G38710.2	833862	At.50494	NM_123232		AT5G38710	MKD10.10|MKD10_10	Methylenetetrahydrofolate reductase family protein	protein-coding
merged_clf_H3K9_q_0.05_with_ctrl.peaks_peak_848	1	3821648	3822934	+	235	NA	exon (AT1G11360.2, exon 1 of 2)	exon (AT1G11360.2, exon 1 of 2)	797	AT1G11360.4	837678	At.27599	NM_101009		AT1G11360	T23J18.35|T23J18_35	Adenine nucleotide alpha hydrolases-like superfamily protein	protein-coding
merged_clf_H3K9_q_0.05_with_ctrl.peaks_peak_16144	5	5534738	5535243	+	235	NA	promoter-TSS (AT5G16840.2)	promoter-TSS (AT5G16840.2)	305	AT5G16830.1	831546	At.1639	NM_121689		SYP21	ATPEP12|ATSYP21|PEP12|PEP12P|syntaxin of plants 21|syntaxin of plants 21	syntaxin of plants 21	protein-coding
merged_clf_H3K9_q_0.05_with_ctrl.peaks_peak_3375	1	21538507	21539808	+	235	NA	intron (AT1G58180.5, intron 4 of 8)	intron (AT1G58180.5, intron 4 of 8)	372	AT1G58180.7	842185	At.25362	NM_104599		BCA6	A. THALIANA BETA CARBONIC ANHYDRASE 6|ATBCA6|T15M6.18|beta carbonic anhydrase 6	beta carbonic anhydrase 6	protein-coding
merged_clf_H3K9_q_0.05_with_ctrl.peaks_peak_1111	1	4934766	4935858	+	235	NA	exon (AT1G14430.1, exon 1 of 1)	exon (AT1G14430.1, exon 1 of 1)	1192	AT1G14430.1	838005	At.41973	NM_101310		AT1G14430	F14L17.20|F14L17_20	glyoxal oxidase-related protein	protein-coding
merged_clf_H3K9_q_0.05_with_ctrl.peaks_peak_15758	5	3734306	3735172	+	235	NA	TTS (AT5G11610.1)	TTS (AT5G11610.1)	394	AT5G11600.2	831032	At.32238	NM_121198		AT5G11600	T22P22.2	hypothetical protein	protein-coding
merged_clf_H3K9_q_0.05_with_ctrl.peaks_peak_5454	2	3045601	3046072	+	235	NA	intron (AT2G07340.1, intron 2 of 5)	intron (AT2G07340.1, intron 2 of 5)	277	AT2G07340.2	815304	At.13573	NM_126703		PFD1	PREFOLDIN 1|T13E11.11|T13E11_11	PREFOLDIN 1	protein-coding
merged_clf_H3K9_q_0.05_with_ctrl.peaks_peak_15283	5	1588348	1588961	+	235	NA	exon (AT5G05360.1, exon 1 of 3)	exon (AT5G05360.1, exon 1 of 3)	339	AT5G05360.2	830418	At.43299	NM_120618		AT5G05360	K18I23.16|K18I23_16	hypothetical protein	protein-coding
merged_clf_H3K9_q_0.05_with_ctrl.peaks_peak_15676	5	3396461	3397743	+	235	NA	promoter-TSS (AT5G10740.1)	promoter-TSS (AT5G10740.1)	746	AT5G10745.3	2745984	At.44868	NM_203035		AT5G10745	-	transmembrane protein	protein-coding
merged_clf_H3K9_q_0.05_with_ctrl.peaks_peak_9872	3	8152057	8153864	+	235	NA	exon (AT3G22970.2, exon 1 of 3)	exon (AT3G22970.2, exon 1 of 3)	922	AT3G22970.2	821871	At.43562	NM_113197		AT3G22970	-	hypothetical protein (DUF506)	protein-coding
merged_clf_H3K9_q_0.05_with_ctrl.peaks_peak_6715	2	13554914	13556023	+	235	NA	TTS (AT2G08475.1)	TTS (AT2G08475.1)	598	AT2G31880.1	817746	At.13945	NM_128746		SOBIR1	EVERSHED|EVR|F20M17.8|F20M17_8|SUPPRESSOR OF BIR1 1	Leucine-rich repeat protein kinase family protein	protein-coding
merged_clf_H3K9_q_0.05_with_ctrl.peaks_peak_4883	1	29450784	29452244	+	235	NA	TTS (AT1G78260.1)	TTS (AT1G78260.1)	903	AT1G78270.1	844162	At.14794	NM_106476		UGT85A4	AtUGT85A4|F3F9.19|F3F9_19|UDP-glucosyl transferase 85A4	UDP-glucosyl transferase 85A4	protein-coding
merged_clf_H3K9_q_0.05_with_ctrl.peaks_peak_14200	4	15676457	15677892	+	235	NA	intron (AT4G32480.1, intron 2 of 2)	intron (AT4G32480.1, intron 2 of 2)	934	AT4G32480.1	829383	At.2514	NM_119400		AT4G32480	F8B4.180|F8B4_180	sugar phosphate exchanger, putative (DUF506)	protein-coding
merged_clf_H3K9_q_0.05_with_ctrl.peaks_peak_2570	1	12896686	12897433	+	235	NA	exon (AT1G35210.1, exon 1 of 1)	exon (AT1G35210.1, exon 1 of 1)	616	AT1G35210.1	840410	At.39615	NM_103219		AT1G35210	T32G9.25|T32G9_25	hypothetical protein	protein-coding
merged_clf_H3K9_q_0.05_with_ctrl.peaks_peak_3852	1	24631417	24632648	+	235	NA	exon (AT1G66150.1, exon 1 of 2)	exon (AT1G66150.1, exon 1 of 2)	694	AT1G66150.1	842930	At.28076	NM_105286		TMK1	F15E12.4|F15E12_4|transmembrane kinase 1	transmembrane kinase 1	protein-coding
merged_clf_H3K9_q_0.05_with_ctrl.peaks_peak_10378	3	15430749	15431340	+	235	NA	exon (AT3G43540.2, exon 1 of 8)	exon (AT3G43540.2, exon 1 of 8)	384	AT3G43540.1	823446	At.1267	NM_114222		AT3G43540	-	initiation factor 4F subunit (DUF1350)	protein-coding
merged_clf_H3K9_q_0.05_with_ctrl.peaks_peak_19403	5	26950379	26951380	+	235	NA	intron (AT5G67560.1, intron 1 of 5)	intron (AT5G67560.1, intron 1 of 5)	773	AT5G67560.1	836892	At.7634	NM_126156		ARLA1D	ADP-ribosylation factor-like A1D|ATARLA1D|K9I9.13|K9I9_13	ADP-ribosylation factor-like A1D	protein-coding
merged_clf_H3K9_q_0.05_with_ctrl.peaks_peak_2025	1	9241296	9242510	+	234	NA	exon (AT1G26730.2, exon 1 of 11)	exon (AT1G26730.2, exon 1 of 11)	867	AT1G26730.2	839214	At.49308	NM_102436		AT1G26730	T24P13.11|T24P13_11	EXS (ERD1/XPR1/SYG1) family protein	protein-coding
merged_clf_H3K9_q_0.05_with_ctrl.peaks_peak_4321	1	27093055	27093820	+	234	NA	exon (AT1G71970.1, exon 1 of 1)	exon (AT1G71970.1, exon 1 of 1)	544	AT1G71970.1	843528	At.18058	NM_105855		AT1G71970	F17M19.12|F17M19_12	hypothetical protein	protein-coding
merged_clf_H3K9_q_0.05_with_ctrl.peaks_peak_658	1	2954861	2955641	+	234	NA	intron (AT1G09160.1, intron 1 of 7)	intron (AT1G09160.1, intron 1 of 7)	494	AT1G09160.2	837436	At.27393	NM_100786		AT1G09160	T12M4.15|T12M4_15	Protein phosphatase 2C family protein	protein-coding
merged_clf_H3K9_q_0.05_with_ctrl.peaks_peak_1779	1	7899231	7899940	+	234	NA	TTS (AT1G22380.1)	TTS (AT1G22380.1)	750	AT1G22370.2	838844	At.15676	NM_102087		UGT85A5	AtUGT85A5|T16E15.2|T16E15_2|UDP-glucosyl transferase 85A5	UDP-glucosyl transferase 85A5	protein-coding
merged_clf_H3K9_q_0.05_with_ctrl.peaks_peak_3725	1	23854694	23855497	+	234	NA	TTS (AT1G08667.1)	TTS (AT1G08667.1)	187	AT1G08667.1	28716881		NR_139474		AT1G08667	-	ncRNA	ncRNA
merged_clf_H3K9_q_0.05_with_ctrl.peaks_peak_4477	1	27712661	27713636	+	234	NA	TTS (at1g73687)	TTS (at1g73687)	268	ENSRNA049757788-T1
merged_clf_H3K9_q_0.05_with_ctrl.peaks_peak_8399	3	1354744	1356799	+	234	NA	exon (AT3G04910.2, exon 3 of 7)	exon (AT3G04910.2, exon 3 of 7)	1029	AT3G04910.3	819651	At.27912	NM_111363		WNK1	ATWNK1|T9J14.14|T9J14_14|ZIK4|with no lysine (K) kinase 1	with no lysine (K) kinase 1	protein-coding
merged_clf_H3K9_q_0.05_with_ctrl.peaks_peak_11702	3	22810140	22810728	+	234	NA	intron (AT3G61640.1, intron 1 of 1)	intron (AT3G61640.1, intron 1 of 1)	590	AT3G61640.1	825337	At.34255	NM_116029		AGP20	Arabinogalactan protein 20|AtAGP20|arabinogalactan protein 20	arabinogalactan protein 20	protein-coding
merged_clf_H3K9_q_0.05_with_ctrl.peaks_peak_15696	5	3456284	3457291	+	234	NA	promoter-TSS (ENSRNA049758093-T1)	promoter-TSS (ENSRNA049758093-T1)	-38	at5g10945
merged_clf_H3K9_q_0.05_with_ctrl.peaks_peak_15397	5	2063576	2065744	+	234	NA	exon (AT5G06700.1, exon 2 of 5)	exon (AT5G06700.1, exon 2 of 5)	1246	AT5G06700.1	830559	At.32824	NM_120753		AT5G06700	MPH15.5|MPH15_5|TRICHOME BIREFRINGENCE	trichome birefringence-like protein (DUF828)	protein-coding
merged_clf_H3K9_q_0.05_with_ctrl.peaks_peak_5591	2	7051057	7052628	+	234	NA	exon (AT2G16280.1, exon 1 of 1)	exon (AT2G16280.1, exon 1 of 1)	1043	AT2G16280.1	816124	At.20689	NM_127184		KCS9	3-ketoacyl-CoA synthase 9|F16F14.22|F16F14_22	3-ketoacyl-CoA synthase 9	protein-coding
merged_clf_H3K9_q_0.05_with_ctrl.peaks_peak_16498	5	7258856	7259365	+	234	NA	exon (AT5G21960.1, exon 1 of 1)	exon (AT5G21960.1, exon 1 of 1)	458	AT5G21960.1	832256	At.45636	NM_147879		AT5G21960	-	Integrase-type DNA-binding superfamily protein	protein-coding
merged_clf_H3K9_q_0.05_with_ctrl.peaks_peak_1577	1	6872430	6872989	+	234	NA	exon (AT1G19840.1, exon 1 of 1)	exon (AT1G19840.1, exon 1 of 1)	649	AT1G19840.1	28717252	At.65917	NM_001332414		AT1G19840	F6F9.11|F6F9_11|SAUR53|SMALL AUXIN UPREGULATED RNA 53	SAUR-like auxin-responsive protein family	protein-coding
merged_clf_H3K9_q_0.05_with_ctrl.peaks_peak_19406	5	26958026	26958662	+	234	NA	promoter-TSS (AT5G67580.1)	promoter-TSS (AT5G67580.1)	429	AT5G67590.1	836895	At.28805	NM_126159		FRO1	FROSTBITE1|K9I9.16|K9I9_16	NADH-ubiquinone oxidoreductase-like protein	protein-coding
merged_clf_H3K9_q_0.05_with_ctrl.peaks_peak_4763	1	28924537	28925314	+	234	NA	promoter-TSS (AT1G76970.7)	promoter-TSS (AT1G76970.7)	-181	AT1G76970.7	844033	At.21498	NM_106348		AT1G76970	F22K20.7|F22K20_7	Target of Myb protein 1	protein-coding
merged_clf_H3K9_q_0.05_with_ctrl.peaks_peak_12839	4	9129011	9129806	+	234	NA	exon (AT4G16140.2, exon 1 of 1)	exon (AT4G16140.2, exon 1 of 1)	508	AT4G16140.1	827300	At.33108	NM_117707		AT4G16140	DL4110W|FCAALL.289	proline-rich family protein	protein-coding
merged_clf_H3K9_q_0.05_with_ctrl.peaks_peak_12050	4	945718	947050	+	234	NA	exon (AT4G02130.2, exon 1 of 1)	exon (AT4G02130.2, exon 1 of 1)	691	AT4G02130.2	827438	At.3866	NM_116445		GATL6	LGT10|T10M13.14|T10M13_14|galacturonosyltransferase 6|galacturonosyltransferase-like 6	galacturonosyltransferase 6	protein-coding
merged_clf_H3K9_q_0.05_with_ctrl.peaks_peak_13285	4	11488982	11489666	+	234	NA	intron (AT4G21610.1, intron 1 of 3)	intron (AT4G21610.1, intron 1 of 3)	255	AT4G21610.2	828248	At.46979	NM_118281		LOL2	F18E5.230|F18E5_230|lsd one like 2	lsd one like 2	protein-coding
merged_clf_H3K9_q_0.05_with_ctrl.peaks_peak_44	1	185130	186325	+	234	NA	exon (AT1G01500.1, exon 1 of 2)	exon (AT1G01500.1, exon 1 of 2)	694	AT1G01500.1	839430	At.27718	NM_100032		AT1G01500	F22L4.17|F22L4_17	Erythronate-4-phosphate dehydrogenase family protein	protein-coding
merged_clf_H3K9_q_0.05_with_ctrl.peaks_peak_11663	3	22657372	22658323	+	234	NA	TTS (AT3G61210.1)	TTS (AT3G61210.1)	735	AT3G61200.1	825292	At.22490	NM_115984		AT3G61200	-	Thioesterase superfamily protein	protein-coding
merged_clf_H3K9_q_0.05_with_ctrl.peaks_peak_19242	5	26369070	26369819	+	234	NA	TTS (AT5G65930.2)	TTS (AT5G65930.2)	399	AT5G65925.1	836722	At.45471	NM_148165		AT5G65925	-	hypothetical protein	protein-coding
merged_clf_H3K9_q_0.05_with_ctrl.peaks_peak_16313	5	6387541	6389825	+	234	NA	exon (AT5G19090.5, exon 3 of 3)	exon (AT5G19090.5, exon 3 of 3)	948	AT5G19090.5	832028	At.31334	NM_121914		AT5G19090	T16G12.130|T16G12_130	Heavy metal transport/detoxification superfamily protein	protein-coding
merged_clf_H3K9_q_0.05_with_ctrl.peaks_peak_4711	1	28668881	28669391	+	234	NA	exon (AT1G76410.1, exon 1 of 1)	exon (AT1G76410.1, exon 1 of 1)	472	AT1G76410.1	843974	At.34661	NM_106291		ATL8	F15M4.9	RING/U-box superfamily protein	protein-coding
merged_clf_H3K9_q_0.05_with_ctrl.peaks_peak_4398	1	27406719	27407820	+	234	NA	intron (AT1G72830.1, intron 1 of 5)	intron (AT1G72830.1, intron 1 of 5)	271	AT1G72830.2	843614	At.82	NM_105941		NF-YA3	''nuclear factor Y|ATHAP2C|F3N23.3|F3N23_3|HAP2C|nuclear factor Y|subunit A3|subunit A3''	nuclear factor Y, subunit A3	protein-coding
merged_clf_H3K9_q_0.05_with_ctrl.peaks_peak_13908	4	14419368	14420170	+	234	NA	promoter-TSS (AT4G29250.1)	promoter-TSS (AT4G29250.1)	-920	AT4G29250.1	829046	At.4537	NM_119069		AT4G29250	F17A13.70|F17A13_70	HXXXD-type acyl-transferase family protein	protein-coding
merged_clf_H3K9_q_0.05_with_ctrl.peaks_peak_9333	3	5340095	5341227	+	234	NA	promoter-TSS (AT3G15780.1)	promoter-TSS (AT3G15780.1)	587	AT3G15770.2	820820	At.38995	NM_112447		AT3G15770	-	hypothetical protein	protein-coding
merged_clf_H3K9_q_0.05_with_ctrl.peaks_peak_143	1	569338	570333	+	234	NA	exon (AT1G02650.1, exon 3 of 3)	exon (AT1G02650.1, exon 3 of 3)	1277	AT1G02650.1	837951	At.51461	NM_100145		AT1G02650	T14P4.7|T14P4_7	Tetratricopeptide repeat (TPR)-like superfamily protein	protein-coding
merged_clf_H3K9_q_0.05_with_ctrl.peaks_peak_5966	2	9322101	9322662	+	234	NA	intron (AT2G21870.2, intron 1 of 6)	intron (AT2G21870.2, intron 1 of 6)	353	AT2G21870.2	816723	At.24983	NM_127756		MGP1	F7D8.19|F7D8_19|MALE GAMETOPHYTE DEFECTIVE 1	MALE GAMETOPHYTE DEFECTIVE 1	protein-coding
merged_clf_H3K9_q_0.05_with_ctrl.peaks_peak_19077	5	25754118	25755017	+	234	NA	exon (AT5G64410.1, exon 1 of 5)	exon (AT5G64410.1, exon 1 of 5)	934	AT5G64410.1	836562	At.7393	NM_125837		OPT4	ARABIDOPSIS THALIANA OLIGOPEPTIDE TRANSPORTER 4|ATOPT4|MSJ1.25|MSJ1_25|oligopeptide transporter 4	oligopeptide transporter 4	protein-coding
merged_clf_H3K9_q_0.05_with_ctrl.peaks_peak_4574	1	28081484	28082619	+	234	NA	exon (AT1G74740.1, exon 1 of 7)	exon (AT1G74740.1, exon 1 of 7)	620	AT1G74740.1	843813	At.45891	NM_106132		CPK30	ATCPK30|CALCIUM-DEPENDENT PROTEIN KINASE 1A|CDPK1A|F25A4.29|F25A4_29|calcium-dependent protein kinase 30	calcium-dependent protein kinase 30	protein-coding
merged_clf_H3K9_q_0.05_with_ctrl.peaks_peak_9210	3	4753900	4755228	+	234	NA	exon (AT3G14270.1, exon 2 of 12)	exon (AT3G14270.1, exon 2 of 12)	639	AT3G14270.1	820647	At.23226	NM_112285		FAB1B	FORMS APLOID AND BINUCLEATE CELLS 1B	phosphatidylinositol-4-phosphate 5-kinase family protein	protein-coding
merged_clf_H3K9_q_0.05_with_ctrl.peaks_peak_4487	1	27744677	27745318	+	234	NA	TTS (AT1G73780.1)	TTS (AT1G73780.1)	348	AT1G73790.1	843714	At.34954	NM_106038		GIP2	AtGIP2|F25P22.21|F25P22_21|GCP3-Interacting Protein 1b|GCP3-interacting protein 2|GIP1b	mitotic-spindle organizing 1B-like protein (DUF3743)	protein-coding
merged_clf_H3K9_q_0.05_with_ctrl.peaks_peak_14793	4	18118095	18119057	+	233	NA	promoter-TSS (AT4G38810.1)	promoter-TSS (AT4G38810.1)	60	AT4G38810.1	830036	At.21986	NM_120041		AT4G38810	T9A14.90|T9A14_90	Calcium-binding EF-hand family protein	protein-coding
merged_clf_H3K9_q_0.05_with_ctrl.peaks_peak_7187	2	15890027	15890565	+	233	NA	promoter-TSS (AT2G08900.1)	promoter-TSS (AT2G08900.1)	31	AT2G08905.1	28718046		NR_140430		AT2G08905	-	ncRNA	ncRNA
merged_clf_H3K9_q_0.05_with_ctrl.peaks_peak_12161	4	1511870	1513824	+	233	NA	exon (AT4G03420.1, exon 3 of 5)	exon (AT4G03420.1, exon 3 of 5)	1250	AT4G03420.1	827928	At.19892	NM_116580		AT4G03420	F9H3.4|F9H3_4	hypothetical protein (DUF789)	protein-coding
merged_clf_H3K9_q_0.05_with_ctrl.peaks_peak_8146	3	294619	295440	+	233	NA	promoter-TSS (AT3G01830.2)	promoter-TSS (AT3G01830.2)	695	AT3G01820.1	821071	At.46806	NM_111048		AT3G01820	F28J7.15|F28J7_15	P-loop containing nucleoside triphosphate hydrolases superfamily protein	protein-coding
merged_clf_H3K9_q_0.05_with_ctrl.peaks_peak_10686	3	17987411	17988965	+	233	NA	exon (AT3G48530.1, exon 2 of 6)	exon (AT3G48530.1, exon 2 of 6)	810	AT3G48530.1	824012	At.20522	NM_114711		KING1	KINgamma|SNF1-related protein kinase regulatory subunit gamma 1	SNF1-related protein kinase regulatory subunit gamma 1	protein-coding
merged_clf_H3K9_q_0.05_with_ctrl.peaks_peak_18956	5	25330224	25330968	+	233	NA	TTS (AT5G63145.1)	TTS (AT5G63145.1)	471	AT5G63150.1	836436	At.29012	NM_125710		AT5G63150	MDC12.12|MDC12_12	hypothetical protein	protein-coding
merged_clf_H3K9_q_0.05_with_ctrl.peaks_peak_1852	1	8164963	8165599	+	233	NA	exon (AT1G23040.1, exon 1 of 1)	exon (AT1G23040.1, exon 1 of 1)	322	AT1G23040.2	838912	At.10436	NM_102152		AT1G23040	F19G10.19	hydroxyproline-rich glycoprotein family protein	protein-coding
merged_clf_H3K9_q_0.05_with_ctrl.peaks_peak_19325	5	26665167	26665937	+	233	NA	exon (AT5G66790.1, exon 1 of 3)	exon (AT5G66790.1, exon 1 of 3)	710	AT5G66790.1	836812	At.28850	NM_126077		AT5G66790	MUD21.3|MUD21_3	Protein kinase superfamily protein	protein-coding
merged_clf_H3K9_q_0.05_with_ctrl.peaks_peak_4807	1	29121345	29122776	+	233	NA	TTS (AT1G77490.1)	TTS (AT1G77490.1)	834	AT1G77500.1	844086	At.34465	NM_106399		AT1G77500	T5M16.9|T5M16_9	DUF630 family protein, putative (DUF630 and DUF632)	protein-coding
merged_clf_H3K9_q_0.05_with_ctrl.peaks_peak_17691	5	18979041	18980047	+	233	NA	exon (AT5G46780.2, exon 2 of 2)	exon (AT5G46780.2, exon 2 of 2)	567	AT5G46780.2	834721	At.29931	NM_124048		AT5G46780	MZA15.20|MZA15_20	VQ motif-containing protein	protein-coding
merged_clf_H3K9_q_0.05_with_ctrl.peaks_peak_722	1	3240722	3241757	+	233	NA	exon (AT1G09950.1, exon 1 of 1)	exon (AT1G09950.1, exon 1 of 1)	624	AT1G09950.1	837529	At.42201	NM_100869		RAS1	F21M12.34|F21M12_34|RESPONSE TO ABA AND SALT 1	RESPONSE TO ABA AND SALT 1	protein-coding
merged_clf_H3K9_q_0.05_with_ctrl.peaks_peak_5748	2	8093297	8094235	+	233	NA	promoter-TSS (AT2G18680.1)	promoter-TSS (AT2G18680.1)	546	AT2G18670.1	816382	At.13211	NM_127423		AT2G18670	MSF3.5|MSF3_5	RING/U-box superfamily protein	protein-coding
merged_clf_H3K9_q_0.05_with_ctrl.peaks_peak_4873	1	29423685	29424204	+	232	NA	exon (AT1G78210.1, exon 1 of 3)	exon (AT1G78210.1, exon 1 of 3)	645	AT1G78210.1	844157	At.18012	NM_106471		AT1G78210	T11I11.15|T11I11_15	alpha/beta-Hydrolases superfamily protein	protein-coding
merged_clf_H3K9_q_0.05_with_ctrl.peaks_peak_9829	3	7913077	7915251	+	232	NA	exon (AT3G22380.2, exon 3 of 13)	exon (AT3G22380.2, exon 3 of 13)	1259	AT3G22380.3	821807	At.21572	NM_113136		TIC	TIME FOR COFFEE	time for coffee	protein-coding
merged_clf_H3K9_q_0.05_with_ctrl.peaks_peak_18570	5	23596322	23596871	+	232	NA	TTS (AT5G58370.1)	TTS (AT5G58370.1)	354	AT5G58375.1	835950	At.49188	NM_125223		AT5G58375	-	Methyltransferase-related protein	protein-coding
merged_clf_H3K9_q_0.05_with_ctrl.peaks_peak_18237	5	22086072	22086778	+	232	NA	intron (AT5G54390.1, intron 1 of 3)	intron (AT5G54390.1, intron 1 of 3)	427	AT5G54390.1	835527	At.9004	NM_124819		HL	AHL|ATAHL|F24B18.1|F24B18_1|HAL2-like	HAL2-like protein	protein-coding
merged_clf_H3K9_q_0.05_with_ctrl.peaks_peak_11927	4	356764	357248	+	232	NA	promoter-TSS (AT4G00850.2)	promoter-TSS (AT4G00850.2)	290	AT4G00840.1	826193	At.24279	NM_116310		AT4G00840	A_TM018A10.8|A_TM018A10_8|T18A10.14|T18A10_14	DHHC-type zinc finger family protein	protein-coding
merged_clf_H3K9_q_0.05_with_ctrl.peaks_peak_12250	4	2609228	2609982	+	232	NA	intron (AT4G05090.2, intron 2 of 8)	intron (AT4G05090.2, intron 2 of 8)	463	AT4G05090.2	825853	At.33920	NM_116748		AT4G05090	C17L7.10|C17L7_10	Inositol monophosphatase family protein	protein-coding
merged_clf_H3K9_q_0.05_with_ctrl.peaks_peak_7930	2	19089500	19090546	+	232	NA	promoter-TSS (AT2G46500.3)	promoter-TSS (AT2G46500.3)	753	AT2G46505.1	819261	At.23852	NM_130215		SDH4	succinate dehydrogenase subunit 4	succinate dehydrogenase subunit 4	protein-coding
merged_clf_H3K9_q_0.05_with_ctrl.peaks_peak_12311	4	5375816	5376444	+	232	NA	promoter-TSS (AT4G05535.1)	promoter-TSS (AT4G05535.1)	416	AT4G08455.1	826404	At.50326	NM_148294		AT4G08455	-	BTB/POZ domain-containing protein	protein-coding
merged_clf_H3K9_q_0.05_with_ctrl.peaks_peak_10629	3	17644310	17645836	+	232	NA	exon (AT3G47820.1, exon 1 of 1)	exon (AT3G47820.1, exon 1 of 1)	875	AT3G47820.1	823936	At.35768	NM_114650		PUB39	PLANT U-BOX 39	PLANT U-BOX 39	protein-coding
merged_clf_H3K9_q_0.05_with_ctrl.peaks_peak_12119	4	1279056	1280000	+	232	NA	promoter-TSS (AT4G04335.1)	promoter-TSS (AT4G04335.1)	-115	AT4G04335.1	28719555		NR_141797		AT4G04335	-	ncRNA	ncRNA
merged_clf_H3K9_q_0.05_with_ctrl.peaks_peak_15503	5	2621824	2622768	+	232	NA	exon (AT5G08150.1, exon 1 of 1)	exon (AT5G08150.1, exon 1 of 1)	604	AT5G08150.1	830711	At.49736	NM_120898		SOB5	SUPPRESSOR OF PHYTOCHROME B 5|T22D6.90|T22D6_90	suppressor of phytochrome b 5	protein-coding
merged_clf_H3K9_q_0.05_with_ctrl.peaks_peak_13316	4	11636081	11636510	+	232	NA	exon (AT4G21920.1, exon 1 of 1)	exon (AT4G21920.1, exon 1 of 1)	425	AT4G21920.1	828281	At.49406	NM_118313		AT4G21920	F1N20.1	hypothetical protein	protein-coding
merged_clf_H3K9_q_0.05_with_ctrl.peaks_peak_8380	3	1285961	1286557	+	232	NA	exon (AT3G04720.1, exon 1 of 2)	exon (AT3G04720.1, exon 1 of 2)	501	AT3G04720.1	819632	At.252	NM_111344		PR4	AtPR4|F7O18.21|F7O18_21|HEL|HEVEIN-LIKE|PR-4|pathogenesis-related 4	pathogenesis-related 4	protein-coding
merged_clf_H3K9_q_0.05_with_ctrl.peaks_peak_14677	4	17686066	17686950	+	232	NA	exon (AT4G37640.1, exon 2 of 7)	exon (AT4G37640.1, exon 2 of 7)	597	AT4G37640.1	829918	At.24252	NM_119927		ACA2	CALCIUM ATPASE 2|F19F18.130|F19F18_130|calcium ATPase 2	calcium ATPase 2	protein-coding
merged_clf_H3K9_q_0.05_with_ctrl.peaks_peak_12863	4	9254554	9255542	+	232	NA	exon (AT4G16380.3, exon 1 of 2)	exon (AT4G16380.3, exon 1 of 2)	493	AT4G16380.2	2745712	At.24999	NM_202830		AT4G16380	-	Heavy metal transport/detoxification superfamily protein	protein-coding
merged_clf_H3K9_q_0.05_with_ctrl.peaks_peak_9865	3	8112756	8113882	+	232	NA	exon (AT3G22890.1, exon 1 of 5)	exon (AT3G22890.1, exon 1 of 5)	705	AT3G22890.1	821861	At.19053	NM_113189		APS1	ATP sulfurylase 1	ATP sulfurylase 1	protein-coding
merged_clf_H3K9_q_0.05_with_ctrl.peaks_peak_2461	1	11876219	11877307	+	232	NA	exon (AT1G32790.1, exon 1 of 10)	exon (AT1G32790.1, exon 1 of 10)	624	AT1G32790.2	840173	At.27546	NM_103013		CID11	CTC-interacting domain 11|F6N18.17|F6N18_17	CTC-interacting domain 11	protein-coding
merged_clf_H3K9_q_0.05_with_ctrl.peaks_peak_18574	5	23622334	23623410	+	232	NA	TTS (AT5G58440.1)	TTS (AT5G58440.1)	671	AT5G58430.1	835956	At.21678	NM_125229		EXO70B1	ATEXO70B1|MQJ2.2|MQJ2_2|exocyst subunit exo70 family protein B1	exocyst subunit exo70 family protein B1	protein-coding
merged_clf_H3K9_q_0.05_with_ctrl.peaks_peak_18293	5	22330897	22331780	+	232	NA	exon (AT5G55040.2, exon 1 of 10)	exon (AT5G55040.2, exon 1 of 10)	740	AT5G55040.2	835595	At.48079	NM_124886		AT5G55040	K13P22.4|K13P22_4	DNA-binding bromodomain-containing protein	protein-coding
merged_clf_H3K9_q_0.05_with_ctrl.peaks_peak_14274	4	16055815	16056464	+	232	NA	promoter-TSS (AT4G33310.1)	promoter-TSS (AT4G33310.1)	-17	AT4G33310.1	829467	At.23642	NM_119485		AT4G33310	F17M5.70|F17M5_70	hypothetical protein	protein-coding
merged_clf_H3K9_q_0.05_with_ctrl.peaks_peak_9185	3	4651786	4653900	+	232	NA	exon (AT3G14050.1, exon 1 of 6)	exon (AT3G14050.1, exon 1 of 6)	1203	AT3G14050.1	820619	At.25183	NM_112259		RSH2	AT-RSH2|ATRSH2|RELA-SPOT HOMOLOG 2|RELA/SPOT HOMOLOG 2|RELA/SPOT homolog 2	RELA/SPOT homolog 2	protein-coding
merged_clf_H3K9_q_0.05_with_ctrl.peaks_peak_10785	3	18501502	18501923	+	232	NA	promoter-TSS (AT3G08085.1)	promoter-TSS (AT3G08085.1)	-810	AT3G08085.1	28719060		NR_141386		AT3G08085	-	ncRNA	ncRNA
merged_clf_H3K9_q_0.05_with_ctrl.peaks_peak_208	1	852410	853792	+	232	NA	exon (AT1G03440.1, exon 1 of 1)	exon (AT1G03440.1, exon 1 of 1)	950	AT1G03440.1	839504	At.15581	NM_100226		AT1G03440	F21B7.6|F21B7_6	Leucine-rich repeat (LRR) family protein	protein-coding
merged_clf_H3K9_q_0.05_with_ctrl.peaks_peak_18158	5	21633373	21634186	+	232	NA	promoter-TSS (AT5G53310.2)	promoter-TSS (AT5G53310.2)	384	AT5G53300.2	835411	At.24357	NM_124709		UBC10	ubiquitin-conjugating enzyme 10	ubiquitin-conjugating enzyme 10	protein-coding
merged_clf_H3K9_q_0.05_with_ctrl.peaks_peak_12351	4	5792239	5792965	+	232	NA	promoter-TSS (AT4G09035.1)	promoter-TSS (AT4G09035.1)	23	AT4G09035.1	28720035		NM_001340609		AT4G09035	-	hypothetical protein	protein-coding
merged_clf_H3K9_q_0.05_with_ctrl.peaks_peak_16804	5	9050954	9052605	+	232	NA	exon (AT5G25930.1, exon 1 of 2)	exon (AT5G25930.1, exon 1 of 2)	1119	AT5G25930.1	832662	At.30881	NM_122494		AT5G25930	F18A17.4	kinase family with leucine-rich repeat domain-containing protein	protein-coding
merged_clf_H3K9_q_0.05_with_ctrl.peaks_peak_46	1	195805	198383	+	232	NA	intron (AT1G01540.1, intron 1 of 5)	intron (AT1G01540.1, intron 1 of 5)	1282	AT1G01540.1	839533	At.24027	NM_100036		AT1G01540	F22L4.8|F22L4_8	Protein kinase superfamily protein	protein-coding
merged_clf_H3K9_q_0.05_with_ctrl.peaks_peak_15610	5	3073038	3074172	+	232	NA	intron (AT5G09870.1, intron 1 of 12)	intron (AT5G09870.1, intron 1 of 12)	735	AT5G09870.1	830847	At.27671	NM_121024		CESA5	MUCILAGE-MODIFIED 3|MUM3|MYH9.8|MYH9_8|cellulose synthase 5	cellulose synthase 5	protein-coding
merged_clf_H3K9_q_0.05_with_ctrl.peaks_peak_10231	3	10338390	10339170	+	232	NA	exon (AT3G27880.1, exon 1 of 1)	exon (AT3G27880.1, exon 1 of 1)	632	AT3G27880.1	822408	At.42887	NM_113704		AT3G27880	-	hypothetical protein (DUF1645)	protein-coding
merged_clf_H3K9_q_0.05_with_ctrl.peaks_peak_8081	3	40956	41915	+	232	NA	exon (AT3G01120.1, exon 1 of 11)	exon (AT3G01120.1, exon 1 of 11)	724	AT3G01120.1	821292	At.20198	NM_110977		MTO1	A. THALIANA CYSTATHIONINE GAMMA-SYNTHASE 1|A. thaliana cystathionine gamma-synthetase 1|ATCYS1|AtCGS1|AtCYS1|CGS|CGS1|CYSTATHIONINE GAMMA-SYNTHASE|CYSTATHIONINE GAMMA-SYNTHASE 1|CYSTATHIONINE-GAMMA-SYNTHASE|METHIONINE OVERACCUMULATION 1|T4P13.19|T4P13_19	Pyridoxal phosphate (PLP)-dependent transferases superfamily protein	protein-coding
merged_clf_H3K9_q_0.05_with_ctrl.peaks_peak_16409	5	6814010	6815340	+	232	NA	intron (AT5G20190.1, intron 1 of 2)	intron (AT5G20190.1, intron 1 of 2)	913	AT5G20190.1	832142	At.31218	NM_122026		AT5G20190	F5O24.80|F5O24_80	Tetratricopeptide repeat (TPR)-like superfamily protein	protein-coding
merged_clf_H3K9_q_0.05_with_ctrl.peaks_peak_14344	4	16341094	16342169	+	232	NA	TTS (AT4G08925.1)	TTS (AT4G08925.1)	635	AT4G08925.1	28720025		NR_142239		AT4G08925	-	ncRNA	ncRNA
merged_clf_H3K9_q_0.05_with_ctrl.peaks_peak_16770	5	8801807	8802613	+	232	NA	promoter-TSS (AT5G25360.3)	promoter-TSS (AT5G25360.3)	34	AT5G25360.3	832608	At.30915	NM_122445		AT5G25360	F18G18.100|F18G18_100	hypothetical protein	protein-coding
merged_clf_H3K9_q_0.05_with_ctrl.peaks_peak_11744	3	23014565	23015127	+	231	NA	promoter-TSS (AT3G62150.1)	promoter-TSS (AT3G62150.1)	-816	AT3G62150.3	825388	At.34174	NM_116080		ABCB21	ATP-binding cassette B21|P-glycoprotein 21|PGP21	P-glycoprotein 21	protein-coding
merged_clf_H3K9_q_0.05_with_ctrl.peaks_peak_7752	2	18379597	18380268	+	231	NA	TTS (AT2G44510.1)	TTS (AT2G44510.1)	405	AT2G44520.1	819059	At.24738	NM_130015		COX10	F4I1.50|F4I1_50|cytochrome c oxidase 10	cytochrome c oxidase 10	protein-coding
merged_clf_H3K9_q_0.05_with_ctrl.peaks_peak_2588	1	13116086	13117057	+	231	NA	exon (AT1G35560.1, exon 1 of 1)	exon (AT1G35560.1, exon 1 of 1)	664	AT1G35560.1	840452	At.26325	NM_103253		AT1G35560	AtTCP23|F15O4.35|TCP domain protein 23|TCP23	TCP family transcription factor	protein-coding
merged_clf_H3K9_q_0.05_with_ctrl.peaks_peak_13610	4	13067593	13069480	+	231	NA	exon (AT4G25620.1, exon 2 of 2)	exon (AT4G25620.1, exon 2 of 2)	1226	AT4G25620.1	828667	At.32244	NM_118694		AT4G25620	M7J2.10|M7J2_10	hydroxyproline-rich glycoprotein family protein	protein-coding
merged_clf_H3K9_q_0.05_with_ctrl.peaks_peak_18460	5	23183080	23183845	+	231	NA	intron (AT5G57210.2, intron 1 of 4)	intron (AT5G57210.2, intron 1 of 4)	458	AT5G57210.2	835827	At.29344	NM_125103		AT5G57210	MJB24.2|MJB24_2	Ypt/Rab-GAP domain of gyp1p superfamily protein	protein-coding
merged_clf_H3K9_q_0.05_with_ctrl.peaks_peak_5426	2	2271093	2272178	+	231	NA	exon (AT2G05920.1, exon 1 of 2)	exon (AT2G05920.1, exon 1 of 2)	817	AT2G05920.1	815145	At.21638	NM_126605		AT2G05920	T6P5.12|T6P5_12	Subtilase family protein	protein-coding
merged_clf_H3K9_q_0.05_with_ctrl.peaks_peak_13232	4	11216977	11217862	+	231	NA	TTS (AT4G20970.1)	TTS (AT4G20970.1)	475	AT4G20980.3	827845	At.22289	NM_118216		AT4G20980	T13K14.140|T13K14_140	Eukaryotic translation initiation factor 3 subunit 7 (eIF-3)	protein-coding
merged_clf_H3K9_q_0.05_with_ctrl.peaks_peak_8368	3	1240784	1241544	+	231	NA	exon (AT3G04590.1, exon 1 of 6)	exon (AT3G04590.1, exon 1 of 6)	526	AT3G04590.1	819615	At.19818	NM_111330		AT3G04590	AHL14|AT-hook motif nuclear localized protein 14|F7O18.6|F7O18_6	AT hook motif DNA-binding family protein	protein-coding
merged_clf_H3K9_q_0.05_with_ctrl.peaks_peak_15598	5	3024277	3024719	+	231	NA	exon (AT5G09740.2, exon 1 of 8)	exon (AT5G09740.2, exon 1 of 8)	258	AT5G09740.2	830834	At.32464	NM_121011		HAM2	F17I14.70|F17I14_70|HAC11|HAG05|HAG5|HISTONE ACETYLTRANSFERASE OF THE CBP FAMILY 11|HISTONE ACETYLTRANSFERASE OF THE GNAT/MYST SUPERFAMILY 5|histone acetyltransferase of the MYST family 2	histone acetyltransferase of the MYST family 2	protein-coding
merged_clf_H3K9_q_0.05_with_ctrl.peaks_peak_13301	4	11569805	11570958	+	231	NA	intron (AT4G21790.1, intron 1 of 10)	intron (AT4G21790.1, intron 1 of 10)	857	AT4G21790.1	828267	At.24879	NM_118299		TOM1	ATTOM1|F17L22.250|F17L22_250|tobamovirus multiplication 1	tobamovirus multiplication 1	protein-coding
merged_clf_H3K9_q_0.05_with_ctrl.peaks_peak_14166	4	15528755	15529446	+	231	NA	exon (AT4G32160.1, exon 1 of 10)	exon (AT4G32160.1, exon 1 of 10)	675	AT4G32160.1	829348	At.26639	NM_119368		AT4G32160	F10N7.30|F10N7_30	Phox (PX) domain-containing protein	protein-coding
merged_clf_H3K9_q_0.05_with_ctrl.peaks_peak_18958	5	25333353	25335433	+	231	NA	exon (AT5G63160.2, exon 3 of 4)	exon (AT5G63160.2, exon 3 of 4)	1156	AT5G63160.3	836437	At.27672	NM_125711		BT1	BTB and TAZ domain protein 1|MDC12.13|MDC12_13	BTB and TAZ domain protein 1	protein-coding
merged_clf_H3K9_q_0.05_with_ctrl.peaks_peak_14906	5	4047	5020	+	231	NA	promoter-TSS (AT5G01017.1)	promoter-TSS (AT5G01017.1)	461	AT5G01010.2	831893	At.22145	NM_120177		AT5G01010	TOPTELOMERE.1|TOPTELOMERE_1	retinal-binding protein	protein-coding
merged_clf_H3K9_q_0.05_with_ctrl.peaks_peak_16278	5	6192483	6193308	+	231	NA	intron (AT5G18610.2, intron 1 of 4)	intron (AT5G18610.2, intron 1 of 4)	452	AT5G18610.1	831979	At.54903	NM_121866		AT5G18610	PBL27|T28N17.90|T28N17_90	Protein kinase superfamily protein	protein-coding
merged_clf_H3K9_q_0.05_with_ctrl.peaks_peak_7052	2	15192504	15193339	+	231	NA	TTS (AT2G36230.1)	TTS (AT2G36230.1)	441	AT2G36220.1	818194	At.20166	NM_129180		AT2G36220	F2H17.17|F2H17_17	hypothetical protein	protein-coding
merged_clf_H3K9_q_0.05_with_ctrl.peaks_peak_18378	5	22758723	22759343	+	231	NA	TTS (AT5G56240.3)	TTS (AT5G56240.3)	523	AT5G56230.1	835722	At.29399	NM_125006		PRA1.G2	K24C1.4|K24C1_4|prenylated RAB acceptor 1.G2	prenylated RAB acceptor 1.G2	protein-coding
merged_clf_H3K9_q_0.05_with_ctrl.peaks_peak_2874	1	18429065	18430295	+	231	NA	exon (AT1G49780.1, exon 1 of 1)	exon (AT1G49780.1, exon 1 of 1)	817	AT1G49780.1	841401	At.38168	NM_103865		PUB26	F14J22.1|F14J22_1|plant U-box 26	plant U-box 26	protein-coding
merged_clf_H3K9_q_0.05_with_ctrl.peaks_peak_7284	2	16317468	16318123	+	231	NA	promoter-TSS (AT2G39090.1)	promoter-TSS (AT2G39090.1)	357	AT2G39100.2	818496	At.20141	NM_179979		AT2G39100	T7F6.27|T7F6_27	RING/U-box superfamily protein	protein-coding
merged_clf_H3K9_q_0.05_with_ctrl.peaks_peak_3826	1	24440312	24441020	+	230	NA	exon (AT1G65720.1, exon 1 of 1)	exon (AT1G65720.1, exon 1 of 1)	407	AT1G65720.1	842883	At.22495	NM_105246		AT1G65720	F1E22.9|F1E22_9	transmembrane protein	protein-coding
merged_clf_H3K9_q_0.05_with_ctrl.peaks_peak_8382	3	1288956	1290534	+	230	NA	exon (AT3G04730.1, exon 2 of 5)	exon (AT3G04730.1, exon 2 of 5)	1146	AT3G04730.1	819633	At.24121	NM_111345		IAA16	F7O18.22|F7O18_22|indoleacetic acid-induced protein 16	indoleacetic acid-induced protein 16	protein-coding
merged_clf_H3K9_q_0.05_with_ctrl.peaks_peak_611	1	2712961	2714396	+	230	NA	exon (AT1G08570.1, exon 2 of 4)	exon (AT1G08570.1, exon 2 of 4)	748	AT1G08570.4	837379	At.24182	NM_100730		ACHT4	atypical CYS HIS rich thioredoxin 4|atypical CYS HIS rich thioredoxin 4	atypical CYS HIS rich thioredoxin 4	protein-coding
merged_clf_H3K9_q_0.05_with_ctrl.peaks_peak_4394	1	27394785	27396447	+	230	NA	exon (AT1G72790.1, exon 1 of 1)	exon (AT1G72790.1, exon 1 of 1)	1018	AT1G72790.1	843610	At.27739	NM_105937		AT1G72790	F28P22.2|F28P22_2	hydroxyproline-rich glycoprotein family protein	protein-coding
merged_clf_H3K9_q_0.05_with_ctrl.peaks_peak_11633	3	22546683	22548040	+	230	NA	intron (AT3G60961.1, intron 1 of 5)	intron (AT3G60961.1, intron 1 of 5)	-5199	AT3G60966.1	3769752	At.73258	NM_001035830		AT3G60966	-	RING/U-box superfamily protein	protein-coding
merged_clf_H3K9_q_0.05_with_ctrl.peaks_peak_769	1	3393105	3395049	+	230	NA	intron (AT1G10350.1, intron 1 of 1)	intron (AT1G10350.1, intron 1 of 1)	1104	AT1G10350.1	837574	At.11287	NM_100909		AT1G10350	F14N23.23|F14N23_23	DNAJ heat shock family protein	protein-coding
merged_clf_H3K9_q_0.05_with_ctrl.peaks_peak_17213	5	16057227	16058946	+	230	NA	exon (AT5G40140.1, exon 1 of 1)	exon (AT5G40140.1, exon 1 of 1)	1007	AT5G40140.1	834011	At.55272	NM_123377		AT5G40140	MSN9.4|MSN9_4	RING/U-box superfamily protein with ARM repeat domain-containing protein	protein-coding
merged_clf_H3K9_q_0.05_with_ctrl.peaks_peak_8397	3	1346448	1347375	+	230	NA	promoter-TSS (AT3G01525.1)	promoter-TSS (AT3G01525.1)	-146	AT3G01525.1	28718493		NR_140837		AT3G01525	-	ncRNA	ncRNA
merged_clf_H3K9_q_0.05_with_ctrl.peaks_peak_16835	5	9401553	9402380	+	230	NA	intron (AT5G26751.1, intron 1 of 12)	intron (AT5G26751.1, intron 1 of 12)	510	AT5G26751.1	832733	At.132	NM_122557		SK 11	ARABIDOPSIS THALIANA SHAGGY-RELATED KINASE 11|ASKALPHA|ASKalpha|ATSK11|Arabidopsis GSK alpha|F2P16.21|F2P16_21|shaggy-related kinase 11	shaggy-related kinase 11	protein-coding
merged_clf_H3K9_q_0.05_with_ctrl.peaks_peak_18995	5	25477748	25478706	+	230	NA	exon (AT5G63640.2, exon 2 of 11)	exon (AT5G63640.2, exon 2 of 11)	671	AT5G63640.2	836484	At.8695	NM_125759		AT5G63640	MBK5.12|MBK5_12	ENTH/VHS/GAT family protein	protein-coding
merged_clf_H3K9_q_0.05_with_ctrl.peaks_peak_15978	5	4756252	4757057	+	230	NA	exon (AT5G14730.1, exon 1 of 1)	exon (AT5G14730.1, exon 1 of 1)	597	AT5G14730.1	831325	At.9940	NM_121477		AT5G14730	T9L3.30|T9L3_30	hypothetical protein	protein-coding
merged_clf_H3K9_q_0.05_with_ctrl.peaks_peak_13426	4	12171061	12172463	+	230	NA	exon (AT4G23270.3, exon 1 of 8)	exon (AT4G23270.3, exon 1 of 8)	745	AT4G23270.3	828426	At.45988	NM_118456		CRK19	F21P8.160|F21P8_160|cysteine-rich RLK (RECEPTOR-like protein kinase) 19	cysteine-rich RLK (RECEPTOR-like protein kinase) 19	protein-coding
merged_clf_H3K9_q_0.05_with_ctrl.peaks_peak_18895	5	25097958	25099317	+	230	NA	TTS (AT5G62530.1)	TTS (AT5G62530.1)	610	AT5G62520.2	836372	At.9309	NM_125646		SRO5	K19B1.13|K19B1_13|similar to RCD one 5	similar to RCD one 5	protein-coding
merged_clf_H3K9_q_0.05_with_ctrl.peaks_peak_3096	1	19935118	19936123	+	230	NA	exon (AT1G53430.2, exon 1 of 24)	exon (AT1G53430.2, exon 1 of 24)	457	AT1G53430.2	841778	At.21553	NM_001124007		AT1G53430	T3F20.25|T3F20_25	Leucine-rich repeat transmembrane protein kinase	protein-coding
merged_clf_H3K9_q_0.05_with_ctrl.peaks_peak_4556	1	27982603	27983938	+	230	NA	exon (AT1G74450.1, exon 1 of 1)	exon (AT1G74450.1, exon 1 of 1)	817	AT1G74450.1	843786	At.18129	NM_106105		AT1G74450	F1M20.13|F1M20_13	BPS1-like protein (DUF793)	protein-coding
merged_clf_H3K9_q_0.05_with_ctrl.peaks_peak_1848	1	8152587	8153588	+	230	NA	intron (AT1G23020.2, intron 2 of 8)	intron (AT1G23020.2, intron 2 of 8)	443	AT1G23020.2	838910	At.41573	NM_102150		FRO3	ATFRO3|F19G10.4|F19G10_4|FERRIC REDUCTION OXIDASE 3|ferric reduction oxidase 3	ferric reduction oxidase 3	protein-coding
merged_clf_H3K9_q_0.05_with_ctrl.peaks_peak_16029	5	4984933	4986187	+	230	NA	intron (AT5G15350.1, intron 1 of 1)	intron (AT5G15350.1, intron 1 of 1)	817	AT5G15350.1	831387	At.24543	NM_121539		ENODL17	AtENODL17|F8M21.240|F8M21_240|early nodulin-like protein 17	early nodulin-like protein 17	protein-coding
merged_clf_H3K9_q_0.05_with_ctrl.peaks_peak_11767	3	23116479	23116959	+	230	NA	intron (AT3G09775.1, intron 1 of 1)	intron (AT3G09775.1, intron 1 of 1)	445	AT3G09775.1	28719243		NR_141565		AT3G09775	-	ncRNA	ncRNA
merged_clf_H3K9_q_0.05_with_ctrl.peaks_peak_9310	3	5226992	5227791	+	230	NA	intron (AT3G15480.1, intron 1 of 2)	intron (AT3G15480.1, intron 1 of 2)	544	AT3G15480.1	820787	At.20829	NM_112416		AT3G15480	-	fiber (DUF1218)	protein-coding
merged_clf_H3K9_q_0.05_with_ctrl.peaks_peak_12159	4	1501851	1502863	+	230	NA	promoter-TSS (AT4G03400.1)	promoter-TSS (AT4G03400.1)	750	AT4G03405.1	3770386				AT4G03405	67050.TRNA-GLN-1|67051.TRNA-GLN-1	tRNA	tRNA
merged_clf_H3K9_q_0.05_with_ctrl.peaks_peak_13226	4	11172633	11174227	+	230	NA	exon (AT4G20860.1, exon 1 of 1)	exon (AT4G20860.1, exon 1 of 1)	808	AT4G20860.1	827834	At.3571	NM_118204		AT4G20860	T13K14.20|T13K14_20	FAD-binding Berberine family protein	protein-coding
merged_clf_H3K9_q_0.05_with_ctrl.peaks_peak_1180	1	5193301	5194198	+	230	NA	TTS (AT1G15085.1)	TTS (AT1G15085.1)	465	AT1G15100.1	838073	At.10851	NM_101378		RHA2A	RING-H2 FINGER PROTEIN RHA2A|RING-H2 finger A2A	RING-H2 finger A2A	protein-coding
merged_clf_H3K9_q_0.05_with_ctrl.peaks_peak_13846	4	14048362	14049469	+	230	NA	intron (AT4G28400.3, intron 1 of 4)	intron (AT4G28400.3, intron 1 of 4)	285	AT4G28400.3	828957	At.24767	NM_118982		AT4G28400	F20O9.80|F20O9_80	Protein phosphatase 2C family protein	protein-coding
merged_clf_H3K9_q_0.05_with_ctrl.peaks_peak_11274	3	20822120	20822921	+	230	NA	promoter-TSS (AT3G56120.1)	promoter-TSS (AT3G56120.1)	497	AT3G56110.4	824777	At.5058	NM_115469		PRA1.B1	prenylated RAB acceptor 1.B1	prenylated RAB acceptor 1.B1	protein-coding
merged_clf_H3K9_q_0.05_with_ctrl.peaks_peak_5458	2	3781390	3782182	+	230	NA	exon (AT2G09990.1, exon 1 of 1)	exon (AT2G09990.1, exon 1 of 1)	458	AT2G09990.1	815456	At.48467	NM_126785		AT2G09990	F7B19.13|F7B19_13	Ribosomal protein S5 domain 2-like superfamily protein	protein-coding
merged_clf_H3K9_q_0.05_with_ctrl.peaks_peak_6147	2	10281923	10282858	+	230	NA	exon (AT2G24180.1, exon 1 of 2)	exon (AT2G24180.1, exon 1 of 2)	672	AT2G24180.1	816952	At.21132	NM_127979		CYP71B6	CYTOCHROME P450 MONOOXYGENASE 71B6|F27D4.9|F27D4_9|cytochrome p450 71b6	cytochrome p450 71b6	protein-coding
merged_clf_H3K9_q_0.05_with_ctrl.peaks_peak_5057	1	30191862	30192896	+	230	NA	exon (AT1G80300.1, exon 1 of 5)	exon (AT1G80300.1, exon 1 of 5)	841	AT1G80300.1	844370	At.23897	NM_106679		NTT1	AATP1|ATNTT1|F5I6.5|F5I6_5|nucleotide transporter 1	nucleotide transporter 1	protein-coding
merged_clf_H3K9_q_0.05_with_ctrl.peaks_peak_8070	2	19670532	19671058	+	230	NA	promoter-TSS (AT2G48090.2)	promoter-TSS (AT2G48090.2)	110	AT2G48100.2	819422	At.13478	NM_130377		AT2G48100	-	Exonuclease family protein	protein-coding
merged_clf_H3K9_q_0.05_with_ctrl.peaks_peak_1360	1	5933906	5934664	+	230	NA	intron (AT1G17340.1, intron 1 of 15)	intron (AT1G17340.1, intron 1 of 15)	505	AT1G17340.1	838305	At.43908	NM_101595		AT1G17340	F28G4.21|F28G4_21|SAC5|suppressor of actin 5	Phosphoinositide phosphatase family protein	protein-coding
merged_clf_H3K9_q_0.05_with_ctrl.peaks_peak_12979	4	9751059	9751686	+	230	NA	intron (AT4G17486.1, intron 1 of 4)	intron (AT4G17486.1, intron 1 of 4)	337	AT4G17486.2	827462	At.27036	NM_117853		AT4G17486	FCAALL.234	PPPDE putative thiol peptidase family protein	protein-coding
merged_clf_H3K9_q_0.05_with_ctrl.peaks_peak_19197	5	26218719	26219355	+	230	NA	promoter-TSS (AT5G65610.1)	promoter-TSS (AT5G65610.1)	308	AT5G65609.1	6241295		NM_001345699		AT5G65609	-	hypothetical protein	protein-coding
merged_clf_H3K9_q_0.05_with_ctrl.peaks_peak_2329	1	10967074	10967999	+	230	NA	Intergenic	Intergenic	-3890	AT1G30830.1	3766854				AT1G30830	50967.TRNA-VAL-1	tRNA	tRNA
merged_clf_H3K9_q_0.05_with_ctrl.peaks_peak_9717	3	7228064	7228567	+	230	NA	exon (AT3G20660.1, exon 1 of 2)	exon (AT3G20660.1, exon 1 of 2)	482	AT3G20660.1	821613	At.50209	NM_112957		2021-10-04	AtOCT4|organic cation/carnitine transporter4	organic cation/carnitine transporter4	protein-coding
merged_clf_H3K9_q_0.05_with_ctrl.peaks_peak_1328	1	5786465	5787058	+	230	NA	TTS (AT1G16910.1)	TTS (AT1G16910.1)	394	AT1G16916.1	6241479	At.47889	NM_001123827		AT1G16916	-	transmembrane protein	protein-coding
merged_clf_H3K9_q_0.05_with_ctrl.peaks_peak_11146	3	20213532	20214229	+	230	NA	TTS (AT3G54600.1)	TTS (AT3G54600.1)	474	AT3G54610.1	824626	At.10490	NM_115318		HAG1	BGT|BIG TOP|GCN5|HAC3|HAG01|HAT1|HISTONE ACETYLTRANSFERASE 1|general control non-repressible 5|histone acetyltransferase of the GNAT family 1	histone acetyltransferase of the GNAT family 1	protein-coding
merged_clf_H3K9_q_0.05_with_ctrl.peaks_peak_17982	5	20705346	20706760	+	230	NA	exon (AT5G50900.1, exon 1 of 1)	exon (AT5G50900.1, exon 1 of 1)	789	AT5G50900.1	835162	At.25502	NM_124468		AT5G50900	K3K7.4|K3K7_4	ARM repeat superfamily protein	protein-coding
merged_clf_H3K9_q_0.05_with_ctrl.peaks_peak_17062	5	14885425	14885994	+	230	NA	TTS (AT5G37485.1)	TTS (AT5G37485.1)	130	AT5G37480.2	833726	At.30485	NM_123107		AT5G37480	MPA22.2|MPA22_2	maltase-glucoamylase, intestinal protein	protein-coding
merged_clf_H3K9_q_0.05_with_ctrl.peaks_peak_15290	5	1606488	1607417	+	230	NA	promoter-TSS (AT5G05430.3)	promoter-TSS (AT5G05430.3)	-240	AT5G05430.1	830426		NM_120625		AT5G05430	K18I23.24|K18I23_24	RNA-binding protein	protein-coding
merged_clf_H3K9_q_0.05_with_ctrl.peaks_peak_12154	4	1487692	1488183	+	230	NA	intron (AT4G03380.1, intron 3 of 6)	intron (AT4G03380.1, intron 3 of 6)	2291	AT4G03380.1	827946	At.50318	NM_116576		AT4G03380	F4C21.34|F4C21_34	hypothetical protein	protein-coding
merged_clf_H3K9_q_0.05_with_ctrl.peaks_peak_16211	5	5898740	5900216	+	230	NA	TTS (AT5G17847.1)	TTS (AT5G17847.1)	432	AT5G17850.2	831653	At.54892	NM_121791		AT5G17850	MVA3.200|MVA3_200	Sodium/calcium exchanger family protein	protein-coding
merged_clf_H3K9_q_0.05_with_ctrl.peaks_peak_15931	5	4556168	4558123	+	229	NA	promoter-TSS (AT5G02155.1)	promoter-TSS (AT5G02155.1)	-148	AT5G02155.1	28720446		NR_142577		AT5G02155	-	ncRNA	ncRNA
merged_clf_H3K9_q_0.05_with_ctrl.peaks_peak_9225	3	4831599	4833522	+	229	NA	exon (AT3G14440.1, exon 1 of 1)	exon (AT3G14440.1, exon 1 of 1)	1455	AT3G14440.1	820667	At.26346	NM_112304		NCED3	9-CIS-EPOXYCAROTENOID DIOXYGENASE|ATNCED3|SALT TOLERANT 1|SIS7|STO1|SUGAR INSENSITIVE 7|nine-cis-epoxycarotenoid dioxygenase 3	nine-cis-epoxycarotenoid dioxygenase 3	protein-coding
merged_clf_H3K9_q_0.05_with_ctrl.peaks_peak_9325	3	5295826	5297562	+	229	NA	promoter-TSS (AT3G15635.1)	promoter-TSS (AT3G15635.1)	-58	AT3G15620.2	820804	At.188	NM_112432		UVR3	6-4 PHOTOLYASE|UV REPAIR DEFECTIVE 3	DNA photolyase family protein	protein-coding
merged_clf_H3K9_q_0.05_with_ctrl.peaks_peak_6090	2	9954448	9955060	+	229	NA	promoter-TSS (AT2G23380.1)	promoter-TSS (AT2G23380.1)	337	AT2G23370.2	816869	At.39302	NM_179709		AT2G23370	F26B6.2|F26B6_2	cyclin delta-3	protein-coding
merged_clf_H3K9_q_0.05_with_ctrl.peaks_peak_14924	5	54095	54844	+	229	NA	TTS (AT5G01150.1)	TTS (AT5G01150.1)	613	AT5G01160.2	831742	At.9814	NM_120194		AT5G01160	F7J8.140|F7J8_140	RING/U-box superfamily protein	protein-coding
merged_clf_H3K9_q_0.05_with_ctrl.peaks_peak_3732	1	23890934	23892103	+	229	NA	exon (AT1G64380.1, exon 1 of 1)	exon (AT1G64380.1, exon 1 of 1)	675	AT1G64380.1	842745	At.36008	NM_105113		AT1G64380	F15H21.12|F15H21_12	Integrase-type DNA-binding superfamily protein	protein-coding
merged_clf_H3K9_q_0.05_with_ctrl.peaks_peak_5951	2	9215863	9216501	+	229	NA	intron (AT2G21520.1, intron 1 of 10)	intron (AT2G21520.1, intron 1 of 10)	546	AT2G21520.3	816691	At.43802	NM_127724		AT2G21520	F3K23.28|F3K23_28	Sec14p-like phosphatidylinositol transfer family protein	protein-coding
merged_clf_H3K9_q_0.05_with_ctrl.peaks_peak_10602	3	17523520	17524432	+	229	NA	exon (AT3G47550.6, exon 1 of 7)	exon (AT3G47550.6, exon 1 of 7)	478	AT3G47550.6	823909	At.48746	NM_114623		AT3G47550	-	RING/FYVE/PHD zinc finger superfamily protein	protein-coding
merged_clf_H3K9_q_0.05_with_ctrl.peaks_peak_285	1	1187241	1188358	+	229	NA	exon (AT1G04400.2, exon 2 of 5)	exon (AT1G04400.2, exon 2 of 5)	635	AT1G04400.2	839529	At.21976	NM_100320		CRY2	AT-PHH1|ATCRY2|CRYPTOCHROME 2 APOPROTEIN|F19P19.14|F19P19_14|FHA|PHH1|cryptochrome 2	cryptochrome 2	protein-coding
merged_clf_H3K9_q_0.05_with_ctrl.peaks_peak_16916	5	9984110	9985228	+	229	NA	exon (AT5G27950.1, exon 1 of 10)	exon (AT5G27950.1, exon 1 of 10)	623	AT5G27950.1	832864	At.28657	NM_122678		AT5G27950	F15F15.20|F15F15_20	P-loop containing nucleoside triphosphate hydrolases superfamily protein	protein-coding
merged_clf_H3K9_q_0.05_with_ctrl.peaks_peak_10366	3	14878971	14879707	+	229	NA	intron (AT3G42790.1, intron 2 of 4)	intron (AT3G42790.1, intron 2 of 4)	453	AT3G42790.1	823316	At.27212	NM_114147		AL3	alfin-like 3	alfin-like 3	protein-coding
merged_clf_H3K9_q_0.05_with_ctrl.peaks_peak_13295	4	11545919	11546431	+	229	NA	exon (AT4G21740.1, exon 1 of 1)	exon (AT4G21740.1, exon 1 of 1)	544	AT4G21740.1	828262	At.32602	NM_118294		AT4G21740	F17L22.200|F17L22_200	transmembrane protein	protein-coding
merged_clf_H3K9_q_0.05_with_ctrl.peaks_peak_15597	5	3003741	3004240	+	229	NA	promoter-TSS (AT5G09690.1)	promoter-TSS (AT5G09690.1)	-451	AT5G09690.2	830828	At.32473	NM_121006		MGT7	ARABIDOPSIS THALIANA MAGNESIUM TRANSPORTER 7|ATMGT7|F17I14.120|F17I14_120|MRS2-7|magnesium transporter 7	magnesium transporter 7	protein-coding
merged_clf_H3K9_q_0.05_with_ctrl.peaks_peak_4757	1	28892241	28893194	+	229	NA	exon (AT1G76920.1, exon 1 of 1)	exon (AT1G76920.1, exon 1 of 1)	741	AT1G76920.1	844027	At.21630	NM_106343		AT1G76920	F22K20.2|F22K20_2	F-box family protein	protein-coding
merged_clf_H3K9_q_0.05_with_ctrl.peaks_peak_14186	4	15613125	15614222	+	229	NA	intron (AT4G32340.1, intron 1 of 2)	intron (AT4G32340.1, intron 1 of 2)	871	AT4G32340.1	829368	At.2033	NM_119386		AT4G32340	F8B4.40	Tetratricopeptide repeat (TPR)-like superfamily protein	protein-coding
merged_clf_H3K9_q_0.05_with_ctrl.peaks_peak_17302	5	16569533	16570130	+	229	NA	exon (AT5G41400.1, exon 1 of 1)	exon (AT5G41400.1, exon 1 of 1)	444	AT5G41400.1	834142	At.30234	NM_123505		AT5G41400	MYC6.11|MYC6_11	RING/U-box superfamily protein	protein-coding
merged_clf_H3K9_q_0.05_with_ctrl.peaks_peak_5700	2	7767096	7767715	+	229	NA	exon (AT2G17880.1, exon 1 of 1)	exon (AT2G17880.1, exon 1 of 1)	635	AT2G17880.1	816298	At.24450	NM_127342		AT2G17880	DJC24|DNA J protein C24|T13L16.10|T13L16_10	Chaperone DnaJ-domain superfamily protein	protein-coding
merged_clf_H3K9_q_0.05_with_ctrl.peaks_peak_10297	3	11030120	11030691	+	229	NA	exon (AT3G29034.1, exon 1 of 1)	exon (AT3G29034.1, exon 1 of 1)	501	AT3G29034.1	822546	At.47046	NM_180315		AT3G29034	-	transmembrane protein	protein-coding
merged_clf_H3K9_q_0.05_with_ctrl.peaks_peak_10702	3	18075846	18076602	+	229	NA	intron (AT3G48760.1, intron 1 of 4)	intron (AT3G48760.1, intron 1 of 4)	519	AT3G48760.1	824037	At.43205	NM_114735		AT3G48760	-	DHHC-type zinc finger family protein	protein-coding
merged_clf_H3K9_q_0.05_with_ctrl.peaks_peak_247	1	991216	992064	+	229	NA	TTS (AT1G03890.1)	TTS (AT1G03890.1)	534	AT1G03900.1	839378	At.23085	NM_100270		ABCI18	ATNAP4|ATP-binding cassette I18|F21M11.36|NAP4|non-intrinsic ABC protein 4	non-intrinsic ABC protein 4	protein-coding
merged_clf_H3K9_q_0.05_with_ctrl.peaks_peak_867	1	3913839	3914384	+	229	NA	promoter-TSS (AT1G11650.1)	promoter-TSS (AT1G11650.1)	354	AT1G11630.1	837707	At.11186	NM_101036		AT1G11630	F25C20.22|F25C20_22	Tetratricopeptide repeat (TPR)-like superfamily protein	protein-coding
merged_clf_H3K9_q_0.05_with_ctrl.peaks_peak_10979	3	19440978	19442371	+	229	NA	exon (AT3G52450.1, exon 1 of 1)	exon (AT3G52450.1, exon 1 of 1)	753	AT3G52450.1	824410	At.35294	NM_115105		PUB22	AtPUB22|plant U-box 22	plant U-box 22	protein-coding
merged_clf_H3K9_q_0.05_with_ctrl.peaks_peak_18435	5	23064589	23065317	+	229	NA	intron (AT5G57000.1, intron 1 of 3)	intron (AT5G57000.1, intron 1 of 3)	380	AT5G57000.2	835802	At.29352	NM_125082		AT5G57000	MHM17.12|MHM17_12	DEAD-box ATP-dependent RNA helicase	protein-coding
merged_clf_H3K9_q_0.05_with_ctrl.peaks_peak_15379	5	1963830	1964332	+	229	NA	TTS (AT5G06440.4)	TTS (AT5G06440.4)	386	AT5G06430.1	830531	At.32857	NM_120726		AT5G06430	MHF15.5|MHF15_5	Thioredoxin superfamily protein	protein-coding
merged_clf_H3K9_q_0.05_with_ctrl.peaks_peak_5844	2	8688668	8689462	+	229	NA	intron (AT2G20120.2, intron 2 of 7)	intron (AT2G20120.2, intron 2 of 7)	470	AT2G20120.1	816531	At.20924	NM_127570		COV1	CONTINUOUS VASCULAR RING|T2G17.8|T2G17_8	CONTINUOUS VASCULAR RING protein (DUF502)	protein-coding
merged_clf_H3K9_q_0.05_with_ctrl.peaks_peak_7541	2	17540259	17540995	+	229	NA	exon (AT2G42030.1, exon 1 of 2)	exon (AT2G42030.1, exon 1 of 2)	618	AT2G42030.1	818803	At.20315	NM_129766		AT2G42030	T6D20.8|T6D20_8	RING/U-box superfamily protein	protein-coding
merged_clf_H3K9_q_0.05_with_ctrl.peaks_peak_18708	5	24257713	24258973	+	229	NA	TTS (AT5G60265.1)	TTS (AT5G60265.1)	620	AT5G60270.1	836149	At.51102	NM_125420		AT5G60270	F15L12.9|F15L12_9|L-type lectin receptor kinase I.7|LecRK-I.7	Concanavalin A-like lectin protein kinase family protein	protein-coding
merged_clf_H3K9_q_0.05_with_ctrl.peaks_peak_7209	2	15999945	16000785	+	229	NA	exon (AT2G38185.3, exon 2 of 10)	exon (AT2G38185.3, exon 2 of 10)	439	AT2G38185.4	818397	At.73935	NM_129375		APD1	ABERRANT POLLEN DEVELOPMENT 1	RING/U-box superfamily protein	protein-coding
merged_clf_H3K9_q_0.05_with_ctrl.peaks_peak_8321	3	1033796	1034589	+	229	NA	TTS (AT3G03980.1)	TTS (AT3G03980.1)	613	AT3G03990.1	819554	At.27069	NM_111270		AT3G03990	D14|DWARF 14|T11I18.10|T11I18_10	alpha/beta-Hydrolases superfamily protein	protein-coding
merged_clf_H3K9_q_0.05_with_ctrl.peaks_peak_10124	3	9709337	9709971	+	228	NA	TTS (AT3G26510.6)	TTS (AT3G26510.6)	446	AT3G26500.1	822257	At.37205	NM_113557		PIRL2	MFE16.10|plant intracellular ras group-related LRR 2	plant intracellular ras group-related LRR 2	protein-coding
merged_clf_H3K9_q_0.05_with_ctrl.peaks_peak_14966	5	209020	210157	+	228	NA	TTS (AT5G01520.2)	TTS (AT5G01520.2)	722	AT5G01530.1	830325	At.23015	NM_120231		LHCB4.1	F7A7.50|F7A7_50|light harvesting complex photosystem II	light harvesting complex photosystem II	protein-coding
merged_clf_H3K9_q_0.05_with_ctrl.peaks_peak_11591	3	22331566	22332867	+	228	NA	TTS (AT3G60400.1)	TTS (AT3G60400.1)	731	AT3G60410.3	825212	At.1235	NM_115905		AT3G60410	-	hypothetical protein (DUF1639)	protein-coding
merged_clf_H3K9_q_0.05_with_ctrl.peaks_peak_7403	2	16864542	16865386	+	228	NA	exon (AT2G40380.1, exon 1 of 1)	exon (AT2G40380.1, exon 1 of 1)	623	AT2G40380.1	818631	At.28021	NM_129598		PRA1.B2	T3G21.15|T3G21_15|prenylated RAB acceptor 1.B2	prenylated RAB acceptor 1.B2	protein-coding
merged_clf_H3K9_q_0.05_with_ctrl.peaks_peak_7245	2	16149055	16149712	+	228	NA	exon (AT2G38610.1, exon 3 of 8)	exon (AT2G38610.1, exon 3 of 8)	490	AT2G38610.1	818443	At.23456	NM_129418		AT2G38610	T6A23.19|T6A23_19	RNA-binding KH domain-containing protein	protein-coding
merged_clf_H3K9_q_0.05_with_ctrl.peaks_peak_5204	2	315777	316581	+	228	NA	TTS (AT2G01720.1)	TTS (AT2G01720.1)	467	AT2G01710.1	814700	At.13463	NM_126232		AT2G01710	T8O11.12|T8O11_12	Chaperone DnaJ-domain superfamily protein	protein-coding
merged_clf_H3K9_q_0.05_with_ctrl.peaks_peak_6173	2	10427925	10429213	+	228	NA	promoter-TSS (AT2G24545.1)	promoter-TSS (AT2G24545.1)	-908	AT2G24545.1	5007906		NR_140661		AT2G24545	-	ncRNA	ncRNA
merged_clf_H3K9_q_0.05_with_ctrl.peaks_peak_1441	1	6299719	6300844	+	228	NA	TTS (AT1G18310.1)	TTS (AT1G18310.1)	612	AT1G18300.1	838410	At.22732	NM_101688		NUDT4	F15H18.18|atnudt4|nudix hydrolase homolog 4	nudix hydrolase homolog 4	protein-coding
merged_clf_H3K9_q_0.05_with_ctrl.peaks_peak_4088	1	26057141	26057971	+	228	NA	exon (AT1G69310.1, exon 1 of 5)	exon (AT1G69310.1, exon 1 of 5)	549	AT1G69310.4	843262	At.35430	NM_105598		WRKY57	ATWRKY57|F23O10.11|F23O10_11|WRKY DNA-binding protein 57	WRKY DNA-binding protein 57	protein-coding
merged_clf_H3K9_q_0.05_with_ctrl.peaks_peak_1459	1	6377879	6378573	+	228	NA	TTS (AT1G18530.1)	TTS (AT1G18530.1)	354	AT1G18540.1	838435	At.24719	NM_101712		AT1G18540	F25I16.12|F25I16_12	Ribosomal protein L6 family protein	protein-coding
merged_clf_H3K9_q_0.05_with_ctrl.peaks_peak_12113	4	1229227	1229877	+	228	NA	promoter-TSS (AT4G02760.8)	promoter-TSS (AT4G02760.8)	-538	AT4G02760.1	828184	At.47914	NM_001084879		AT4G02760	T5J8.6|T5J8_6	RNI-like superfamily protein	protein-coding
merged_clf_H3K9_q_0.05_with_ctrl.peaks_peak_15897	5	4426530	4427026	+	228	NA	intron (AT5G13710.1, intron 2 of 13)	intron (AT5G13710.1, intron 2 of 13)	179	AT5G13710.2	831216	At.23211	NM_121374		SMT1	CEPHALOPOD|CPH|MSH12.18|MSH12_18|SAM:CYCLOARTENOL-C24-METHYLTRANSFERASE|sterol methyltransferase 1	sterol methyltransferase 1	protein-coding
merged_clf_H3K9_q_0.05_with_ctrl.peaks_peak_16339	5	6512106	6512727	+	228	NA	intron (AT5G19330.2, intron 1 of 16)	intron (AT5G19330.2, intron 1 of 16)	343	AT5G19330.2	832053	At.20128	NM_121938		ARIA	ARM repeat protein interacting with ABF2|ARM repeat protein interacting with ABF2|F7K24.80|F7K24_80	ARM repeat protein interacting with ABF2	protein-coding
merged_clf_H3K9_q_0.05_with_ctrl.peaks_peak_11573	3	22273929	22275422	+	228	NA	intron (AT3G60260.3, intron 1 of 8)	intron (AT3G60260.3, intron 1 of 8)	170	AT3G60260.3	825197	At.23351	NM_115890		AT3G60260	-	ELMO/CED-12 family protein	protein-coding
merged_clf_H3K9_q_0.05_with_ctrl.peaks_peak_5163	2	151214	151709	+	228	NA	promoter-TSS (AT2G01290.1)	promoter-TSS (AT2G01290.1)	510	AT2G01300.1	814658	At.28520	NM_126191		AT2G01300	F10A8.18|F10A8_18	mediator of RNA polymerase II transcription subunit	protein-coding
merged_clf_H3K9_q_0.05_with_ctrl.peaks_peak_7775	2	18484348	18485079	+	228	NA	exon (AT2G44820.2, exon 2 of 5)	exon (AT2G44820.2, exon 2 of 5)	207	AT2G44820.1	819091	At.36711	NM_130046		AT2G44820	F16B22.34|F16B22_34	axoneme-associated protein MST101(2) protein	protein-coding
merged_clf_H3K9_q_0.05_with_ctrl.peaks_peak_10618	3	17575054	17575762	+	228	NA	TTS (AT3G47660.7)	TTS (AT3G47660.7)	337	AT3G07795.1	28719028		NR_141354		AT3G07795	-	ncRNA	ncRNA
merged_clf_H3K9_q_0.05_with_ctrl.peaks_peak_2963	1	19050347	19051426	+	228	NA	TTS (AT1G51380.2)	TTS (AT1G51380.2)	588	AT1G51390.1	841563	At.66913	NM_104017		NFU5	ATNFU1|F11M15.25|F11M15_25|NFU domain protein 5	NFU domain protein 5	protein-coding
merged_clf_H3K9_q_0.05_with_ctrl.peaks_peak_9696	3	7087525	7088608	+	228	NA	intron (AT3G20320.3, intron 3 of 4)	intron (AT3G20320.3, intron 3 of 4)	-1172	AT3G20310.1	821575	At.20161	NM_112922		ERF7	ATERF-7|ATERF7|ethylene response factor 7	ethylene response factor 7	protein-coding
merged_clf_H3K9_q_0.05_with_ctrl.peaks_peak_8608	3	2228377	2229105	+	228	NA	TTS (AT3G07050.1)	TTS (AT3G07050.1)	814	AT3G07040.1	819889	At.40415	NM_111584		RPM1	DISEASE RESISTANCE PROTEIN RPM1|RESISTANCE TO P. SYRINGAE PV MACULICOLA 1|RESISTANCE TO PSEUDOMONAS SYRINGAE 3|RPS3	NB-ARC domain-containing disease resistance protein	protein-coding
merged_clf_H3K9_q_0.05_with_ctrl.peaks_peak_15146	5	938035	938715	+	228	NA	TTS (AT5G03650.1)	TTS (AT5G03650.1)	377	AT5G03660.2	831768	At.4766	NM_120447		AT5G03660	F17C15.80|F17C15_80	transcriptional activator (DUF662)	protein-coding
merged_clf_H3K9_q_0.05_with_ctrl.peaks_peak_4193	1	26480441	26481460	+	228	NA	exon (AT1G70300.1, exon 2 of 6)	exon (AT1G70300.1, exon 2 of 6)	680	AT1G70300.1	843366	At.27303	NM_105698		KUP6	F17O7.17|F17O7_17|K+ uptake permease 6	K+ uptake permease 6	protein-coding
merged_clf_H3K9_q_0.05_with_ctrl.peaks_peak_17007	5	13902164	13902943	+	228	NA	exon (AT5G35735.1, exon 1 of 2)	exon (AT5G35735.1, exon 1 of 2)	665	AT5G35735.1	833550	At.7499	NM_122964		AT5G35735	-	Auxin-responsive family protein	protein-coding
merged_clf_H3K9_q_0.05_with_ctrl.peaks_peak_7323	2	16507917	16509267	+	228	NA	exon (AT2G39570.1, exon 3 of 6)	exon (AT2G39570.1, exon 3 of 6)	710	AT2G39570.1	818542	At.19583	NM_129515		ACR9	ACT domain repeats 9|F12L6.23|F12L6_23	ACT domain-containing protein	protein-coding
merged_clf_H3K9_q_0.05_with_ctrl.peaks_peak_12047	4	930166	931665	+	228	NA	exon (AT4G02100.1, exon 3 of 3)	exon (AT4G02100.1, exon 3 of 3)	1046	AT4G02100.1	828142	At.34336	NM_116442		AT4G02100	T10M13.11|T10M13_11	Heat shock protein DnaJ with tetratricopeptide repeat-containing protein	protein-coding
merged_clf_H3K9_q_0.05_with_ctrl.peaks_peak_13520	4	12617304	12618037	+	228	NA	exon (AT4G24400.2, exon 2 of 14)	exon (AT4G24400.2, exon 2 of 14)	414	AT4G24400.2	828542	At.3467	NM_118573		CIPK8	ATCIPK8|CBL-interacting protein kinase 8|PKS11|PROTEIN KINASE 11|SNF1-RELATED PROTEIN KINASE 3.13|SnRK3.13|T22A6.230|T22A6_230	CBL-interacting protein kinase 8	protein-coding
merged_clf_H3K9_q_0.05_with_ctrl.peaks_peak_17534	5	17963411	17963910	+	227	NA	promoter-TSS (AT5G44570.2)	promoter-TSS (AT5G44570.2)	123	AT5G44566.1	28721248		NM_001344563		AT5G44566	-	hypothetical protein	protein-coding
merged_clf_H3K9_q_0.05_with_ctrl.peaks_peak_6389	2	11684229	11684978	+	227	NA	exon (AT2G27310.1, exon 1 of 1)	exon (AT2G27310.1, exon 1 of 1)	739	AT2G27310.1	817274	At.13633	NM_128290		AT2G27310	F12K2.11|F12K2_11	F-box family protein	protein-coding
merged_clf_H3K9_q_0.05_with_ctrl.peaks_peak_6599	2	12908226	12909119	+	227	NA	TTS (AT2G30280.1)	TTS (AT2G30280.1)	589	AT2G30270.1	817577	At.28218	NM_128580		AT2G30270	T9D9.8|T9D9_8	LURP-one-like protein (DUF567)	protein-coding
merged_clf_H3K9_q_0.05_with_ctrl.peaks_peak_11792	3	23227714	23228418	+	227	NA	promoter-TSS (AT3G62800.3)	promoter-TSS (AT3G62800.3)	384	AT3G62810.2	825456	At.34047	NM_116146		AT3G62810	-	complex 1 family protein / LVR family protein	protein-coding
merged_clf_H3K9_q_0.05_with_ctrl.peaks_peak_15036	5	448946	450161	+	227	NA	intron (AT5G02230.2, intron 3 of 6)	intron (AT5G02230.2, intron 3 of 6)	1364	AT5G02230.2	831784	At.4818	NM_120301		AT5G02230	T7H20.280|T7H20_280	Haloacid dehalogenase-like hydrolase (HAD) superfamily protein	protein-coding
merged_clf_H3K9_q_0.05_with_ctrl.peaks_peak_16449	5	6985300	6985937	+	227	NA	promoter-TSS (AT5G03185.1)	promoter-TSS (AT5G03185.1)	-69	AT5G03185.1	28720537		NR_142666		AT5G03185	-	ncRNA	ncRNA
merged_clf_H3K9_q_0.05_with_ctrl.peaks_peak_400	1	1744838	1745560	+	227	NA	exon (AT1G05805.1, exon 1 of 6)	exon (AT1G05805.1, exon 1 of 6)	755	AT1G05805.1	837090	At.11933	NM_100461		AT1G05805	ABA-responsive kinase substrate 2|AKS2	basic helix-loop-helix (bHLH) DNA-binding superfamily protein	protein-coding
merged_clf_H3K9_q_0.05_with_ctrl.peaks_peak_10955	3	19323349	19324267	+	227	NA	promoter-TSS (AT3G08230.1)	promoter-TSS (AT3G08230.1)	-262	AT3G08230.1	28719086		NR_141412		AT3G08230	-	ncRNA	ncRNA
merged_clf_H3K9_q_0.05_with_ctrl.peaks_peak_7587	2	17732781	17733883	+	227	NA	TTS (AT2G42600.1)	TTS (AT2G42600.1)	635	AT2G42590.2	818859	At.21859	NM_129820		GRF9	F14N22.14|F14N22_14|GF14 MU|general regulatory factor 9	general regulatory factor 9	protein-coding
merged_clf_H3K9_q_0.05_with_ctrl.peaks_peak_6272	2	11041857	11042810	+	227	NA	exon (AT2G25900.1, exon 2 of 2)	exon (AT2G25900.1, exon 2 of 2)	1002	AT2G25900.1	817131	At.23916	NM_128150		ATCTH	A. THALIANA TANDEM ZINC FINGER PROTEIN 1|ATTZF1|F17H15.7|F17H15_7|PUTATIVE CYS3HIS ZINC FINGER PROTEIN	Zinc finger C-x8-C-x5-C-x3-H type family protein	protein-coding
merged_clf_H3K9_q_0.05_with_ctrl.peaks_peak_5410	2	2023273	2023905	+	227	NA	exon (AT2G05518.1, exon 2 of 3)	exon (AT2G05518.1, exon 2 of 3)	294	AT2G05518.1	7922291		NR_143729		AT2G05518	-	ncRNA	ncRNA
merged_clf_H3K9_q_0.05_with_ctrl.peaks_peak_16764	5	8795280	8797043	+	227	NA	TTS (AT5G03965.1)	TTS (AT5G03965.1)	862	AT5G03965.1	28720597		NR_142721		AT5G03965	-	ncRNA	ncRNA
merged_clf_H3K9_q_0.05_with_ctrl.peaks_peak_1907	1	8536161	8537372	+	227	NA	exon (AT1G24140.1, exon 1 of 1)	exon (AT1G24140.1, exon 1 of 1)	1014	AT1G24140.1	839026	At.41476	NM_102260		AT1G24140	F3I6.6|F3I6_6	Matrixin family protein	protein-coding
merged_clf_H3K9_q_0.05_with_ctrl.peaks_peak_5279	2	837848	838941	+	227	NA	exon (AT2G02870.2, exon 3 of 3)	exon (AT2G02870.2, exon 3 of 3)	554	AT2G02870.2	814818	At.27431	NM_126342		AT2G02870	T17M13.4|T17M13_4	Galactose oxidase/kelch repeat superfamily protein	protein-coding
merged_clf_H3K9_q_0.05_with_ctrl.peaks_peak_14457	4	16806022	16806637	+	227	NA	promoter-TSS (AT4G35335.1)	promoter-TSS (AT4G35335.1)	501	AT4G35320.1	829686	At.23840	NM_119698		AT4G35320	F23E12.120|F23E12_120	hypothetical protein	protein-coding
merged_clf_H3K9_q_0.05_with_ctrl.peaks_peak_16875	5	9669953	9670873	+	227	NA	TTS (AT5G27395.1)	TTS (AT5G27395.1)	602	AT5G27380.1	832797	At.21515	NM_122620		GSH2	AtGSH2|F21A20.90|F21A20_90|GLUTATHIONE SYNTHETASE|GSHB|glutathione synthetase 2	glutathione synthetase 2	protein-coding
merged_clf_H3K9_q_0.05_with_ctrl.peaks_peak_8892	3	3420152	3420825	+	227	NA	TTS (AT3G10920.1)	TTS (AT3G10920.1)	444	AT3G10930.1	820264	At.39835	NM_111930		AT3G10930	-	hypothetical protein	protein-coding
merged_clf_H3K9_q_0.05_with_ctrl.peaks_peak_1461	1	6385304	6385779	+	226	NA	promoter-TSS (AT1G18550.1)	promoter-TSS (AT1G18550.1)	355	AT1G18560.1	838437	At.41787	NM_001332349		AT1G18560	F25I16.10|F25I16_10	BED zinc finger and hAT dimerization domain-containing protein	protein-coding
merged_clf_H3K9_q_0.05_with_ctrl.peaks_peak_16316	5	6414516	6416085	+	226	NA	TTS (AT5G19130.2)	TTS (AT5G19130.2)	812	AT5G19120.1	832032	At.47575	NM_121917		AT5G19120	T24G5.20|T24G5_20	Eukaryotic aspartyl protease family protein	protein-coding
merged_clf_H3K9_q_0.05_with_ctrl.peaks_peak_18983	5	25433284	25433743	+	226	NA	exon (AT5G63530.2, exon 1 of 4)	exon (AT5G63530.2, exon 1 of 4)	247	AT5G63530.2	836472	At.10973	NM_125748		FP3	ARABIDOPSIS THALIANA FARNESYLATED PROTEIN 3|ATFP3|MLE2.16|MLE2_16|farnesylated protein 3	farnesylated protein 3	protein-coding
merged_clf_H3K9_q_0.05_with_ctrl.peaks_peak_1495	1	6524913	6525899	+	226	NA	promoter-TSS (AT1G05453.1)	promoter-TSS (AT1G05453.1)	82	AT1G05453.1	28716314		NR_138901		AT1G05453	-	ncRNA	ncRNA
merged_clf_H3K9_q_0.05_with_ctrl.peaks_peak_935	1	4242651	4243027	+	226	NA	exon (AT1G12440.2, exon 1 of 1)	exon (AT1G12440.2, exon 1 of 1)	124	AT1G12440.2	837801	At.15271	NM_101116		AT1G12440	F5O11.17|F5O11_17	A20/AN1-like zinc finger family protein	protein-coding
merged_clf_H3K9_q_0.05_with_ctrl.peaks_peak_17082	5	14998869	14999589	+	226	NA	TTS (AT5G37760.1)	TTS (AT5G37760.1)	390	AT5G37770.1	833755	At.30466	NM_123136		TCH2	AtCML24|CALMODULIN-LIKE 24|CML24|K22F20.10|K22F20_10|TOUCH 2	EF hand calcium-binding protein family	protein-coding
merged_clf_H3K9_q_0.05_with_ctrl.peaks_peak_11111	3	20037129	20037959	+	226	NA	exon (AT3G54100.1, exon 1 of 8)	exon (AT3G54100.1, exon 1 of 8)	656	AT3G54100.1	824577	At.35137	NM_115270		AT3G54100	-	O-fucosyltransferase family protein	protein-coding
merged_clf_H3K9_q_0.05_with_ctrl.peaks_peak_11473	3	21715031	21715600	+	226	NA	TTS (AT3G09145.1)	TTS (AT3G09145.1)	403	AT3G58710.1	825040		NM_115733		WRKY69	ATWRKY69|RABIDOPSIS THALIANA WRKY DNA-BINDING PROTEIN 69|WRKY DNA-binding protein 69	WRKY DNA-binding protein 69	protein-coding
merged_clf_H3K9_q_0.05_with_ctrl.peaks_peak_7324	2	16510398	16511076	+	226	NA	TTS (AT2G39570.1)	TTS (AT2G39570.1)	312	AT2G39580.1	818543	At.43594	NM_129516		AT2G39580	F12L6.24|F12L6_24	zinc finger C3H1 domain protein	protein-coding
merged_clf_H3K9_q_0.05_with_ctrl.peaks_peak_4482	1	27734303	27735327	+	226	NA	exon (AT1G73740.1, exon 1 of 4)	exon (AT1G73740.1, exon 1 of 4)	791	AT1G73740.1	843709	At.17988	NM_106033		AT1G73740	F25P22.16|F25P22_16	UDP-Glycosyltransferase superfamily protein	protein-coding
merged_clf_H3K9_q_0.05_with_ctrl.peaks_peak_2552	1	12582140	12582573	+	226	NA	exon (AT1G34418.1, exon 1 of 2)	exon (AT1G34418.1, exon 1 of 2)	234	AT1G34418.1	5007751		NR_143576		AT1G34418	-	ncRNA	ncRNA
merged_clf_H3K9_q_0.05_with_ctrl.peaks_peak_12885	4	9334157	9335949	+	226	NA	intron (AT4G16566.3, intron 5 of 5)	intron (AT4G16566.3, intron 5 of 5)	915	AT4G16566.1	827357	At.22235	NM_117757		HINT4	histidine triad nucleotide-binding 4	histidine triad nucleotide-binding 4	protein-coding
merged_clf_H3K9_q_0.05_with_ctrl.peaks_peak_3440	1	22179471	22180857	+	226	NA	exon (AT1G60140.2, exon 2 of 4)	exon (AT1G60140.2, exon 2 of 4)	415	AT1G60140.6	842309	At.27896	NM_104705		TPS10	ATTPS10|T13D8.4|T13D8_4|TREHALOSE PHOSPHATE SYNTHASE 10|trehalose phosphate synthase	trehalose phosphate synthase	protein-coding
merged_clf_H3K9_q_0.05_with_ctrl.peaks_peak_14885	4	18513691	18514288	+	226	NA	intron (AT4G39910.1, intron 1 of 5)	intron (AT4G39910.1, intron 1 of 5)	393	AT4G39910.1	830150	At.24733	NM_120154		UBP3	ATUBP3|T5J17.80|T5J17_80|ubiquitin-specific protease 3	ubiquitin-specific protease 3	protein-coding
merged_clf_H3K9_q_0.05_with_ctrl.peaks_peak_1024	1	4576978	4577860	+	226	NA	promoter-TSS (AT1G13350.3)	promoter-TSS (AT1G13350.3)	548	AT1G13360.3	837896	At.44076	NM_148463		AT1G13360	-	hypothetical protein	protein-coding
merged_clf_H3K9_q_0.05_with_ctrl.peaks_peak_1951	1	8864001	8864846	+	226	NA	intron (AT1G25280.1, intron 1 of 4)	intron (AT1G25280.1, intron 1 of 4)	504	AT1G25280.2	839112	At.23717	NM_102338		TLP10	AtTLP10|F4F7.33|F4F7_33|tubby like protein 10	tubby like protein 10	protein-coding
merged_clf_H3K9_q_0.05_with_ctrl.peaks_peak_5886	2	8899076	8899791	+	226	NA	promoter-TSS (AT2G20635.1)	promoter-TSS (AT2G20635.1)	402	AT2G20630.2	816590	At.25486	NM_127627		PIA1	F23N11.5|F23N11_5|PP2C induced by AVRRPM1	PP2C induced by AVRRPM1	protein-coding
merged_clf_H3K9_q_0.05_with_ctrl.peaks_peak_6471	2	12177822	12178445	+	226	NA	TTS (AT2G28490.1)	TTS (AT2G28490.1)	365	AT2G28480.1	817396	At.50106	NM_128408		AT2G28480	T17D12.4|T17D12_4	RNA-binding CRS1 / YhbY (CRM) domain protein	protein-coding
merged_clf_H3K9_q_0.05_with_ctrl.peaks_peak_10792	3	18534516	18535225	+	226	NA	promoter-TSS (AT3G49990.1)	promoter-TSS (AT3G49990.1)	420	AT3G50000.1	824162	At.268	NM_114860		CKA2	''casein kinase II|ALPHA CHAIN 2|ATCKA2|ATPK15D|CASEIN KINASE II|alpha chain 2|alpha chain 2''|casein kinase II	casein kinase II, alpha chain 2	protein-coding
merged_clf_H3K9_q_0.05_with_ctrl.peaks_peak_7851	2	18817570	18818426	+	226	NA	exon (AT2G45670.1, exon 1 of 14)	exon (AT2G45670.1, exon 1 of 14)	547	AT2G45670.2	819175	At.22680	NM_130129		AT2G45670	F17K2.20	calcineurin B subunit-like protein	protein-coding
merged_clf_H3K9_q_0.05_with_ctrl.peaks_peak_9202	3	4719911	4720888	+	226	NA	intron (AT3G14205.1, intron 1 of 15)	intron (AT3G14205.1, intron 1 of 15)	604	AT3G14205.1	820638	At.26576	NM_112277		AT3G14205	SAC2|suppressor of actin 2	Phosphoinositide phosphatase family protein	protein-coding
merged_clf_H3K9_q_0.05_with_ctrl.peaks_peak_11583	3	22293404	22295317	+	226	NA	exon (AT3G60320.1, exon 1 of 4)	exon (AT3G60320.1, exon 1 of 4)	1169	AT3G60320.1	825203	At.22086	NM_115896		AT3G60320	-	bZIP domain class transcription factor (DUF630 and DUF632)	protein-coding
merged_clf_H3K9_q_0.05_with_ctrl.peaks_peak_2865	1	18377569	18378487	+	226	NA	TTS (AT1G49660.1)	TTS (AT1G49660.1)	606	AT1G49650.1	841389	At.38186	NM_103853		AT1G49650	F14J22.21|F14J22_21	alpha/beta-Hydrolases superfamily protein	protein-coding
merged_clf_H3K9_q_0.05_with_ctrl.peaks_peak_14763	4	18023165	18023971	+	226	NA	TTS (AT4G38530.1)	TTS (AT4G38530.1)	447	AT4G38540.1	830011	At.483	NM_120015		AT4G38540	F20M13.100|F20M13_100	FAD/NAD(P)-binding oxidoreductase family protein	protein-coding
merged_clf_H3K9_q_0.05_with_ctrl.peaks_peak_17047	5	14681403	14681944	+	226	NA	exon (AT5G37130.1, exon 1 of 20)	exon (AT5G37130.1, exon 1 of 20)	325	AT5G37130.1	833685	At.9476	NM_123072		AT5G37130	MJG14.18|MJG14_18	Protein prenylyltransferase superfamily protein	protein-coding
merged_clf_H3K9_q_0.05_with_ctrl.peaks_peak_2997	1	19224921	19225651	+	226	NA	exon (AT1G51805.1, exon 2 of 13)	exon (AT1G51805.1, exon 2 of 13)	404	AT1G51805.2	841607	At.22048	NM_104060		AT1G51805	F19C24.2|F19C24_2	Leucine-rich repeat protein kinase family protein	protein-coding
merged_clf_H3K9_q_0.05_with_ctrl.peaks_peak_2567	1	12852059	12853403	+	226	NA	exon (AT1G35140.1, exon 1 of 1)	exon (AT1G35140.1, exon 1 of 1)	748	AT1G35140.1	840399	At.24168	NM_103210		PHI-1	EXL1|EXL7|EXORDIUM LIKE 7|EXORDIUM like 1|PHOSPHATE-INDUCED 1|T32G9.32|T32G9_32	Phosphate-responsive 1 family protein	protein-coding
merged_clf_H3K9_q_0.05_with_ctrl.peaks_peak_10482	3	16807032	16807783	+	225	NA	intron (AT3G45770.1, intron 2 of 9)	intron (AT3G45770.1, intron 2 of 9)	388	AT3G45770.2	823720	At.3719	NM_114446		AT3G45770	F16L2.2	Polyketide synthase, enoylreductase family protein	protein-coding
merged_clf_H3K9_q_0.05_with_ctrl.peaks_peak_111	1	469828	471463	+	225	NA	TTS (AT1G02350.1)	TTS (AT1G02350.1)	827	AT1G02350.1	839490	At.70439	NM_100116		AT1G02350	T6A9.34	protoporphyrinogen oxidase-like protein	protein-coding
merged_clf_H3K9_q_0.05_with_ctrl.peaks_peak_9543	3	6305948	6306947	+	225	NA	promoter-TSS (AT3G03675.1)	promoter-TSS (AT3G03675.1)	-769	AT3G03675.1	28718682		NR_141020		AT3G03675	-	ncRNA	ncRNA
merged_clf_H3K9_q_0.05_with_ctrl.peaks_peak_2459	1	11845138	11846014	+	225	NA	TTS (AT1G32750.1)	TTS (AT1G32750.1)	588	AT1G32740.4	840168	At.40077	NM_103008		AT1G32740	F6N18.12|F6N18_12	SBP (S-ribonuclease binding protein) family protein	protein-coding
merged_clf_H3K9_q_0.05_with_ctrl.peaks_peak_3613	1	23179547	23180329	+	225	NA	promoter-TSS (AT1G62590.1)	promoter-TSS (AT1G62590.1)	130	AT1G08543.1	28716856		NR_139449		AT1G08543	-	ncRNA	ncRNA
merged_clf_H3K9_q_0.05_with_ctrl.peaks_peak_8722	3	2649649	2651015	+	225	NA	TTS (AT3G08730.1)	TTS (AT3G08730.1)	769	AT3G08720.4	820019	At.266	NM_111706		S6K2	ARABIDOPSIS THALIANA PROTEIN KINASE 2|ARABIDOPSIS THALIANA SERINE/THREONINE PROTEIN KINASE 2|ATPK19|ATPK2|ATS6K2|Arabidopsis thaliana protein kinase 19|serine/threonine protein kinase 2	serine/threonine protein kinase 2	protein-coding
merged_clf_H3K9_q_0.05_with_ctrl.peaks_peak_8641	3	2359871	2360392	+	225	NA	TTS (AT3G07380.1)	TTS (AT3G07380.1)	418	AT3G07370.1	819925	At.18421	NM_111616		CHIP	ATCHIP|CARBOXYL TERMINUS OF HSC70-INTERACTING PROTEIN|carboxyl terminus of HSC70-interacting protein	carboxyl terminus of HSC70-interacting protein	protein-coding
merged_clf_H3K9_q_0.05_with_ctrl.peaks_peak_3018	1	19468813	19469583	+	225	NA	TTS (AT1G52290.2)	TTS (AT1G52290.2)	388	AT1G52280.1	841658	At.22905	NM_104107		RABG3d	AtRABG3d|F19K6.10|F19K6_10|RAB GTPase homolog G3D	RAB GTPase homolog G3D	protein-coding
merged_clf_H3K9_q_0.05_with_ctrl.peaks_peak_8775	3	2889430	2890228	+	225	NA	exon (AT3G09390.1, exon 2 of 2)	exon (AT3G09390.1, exon 2 of 2)	691	AT3G09390.2	820098	At.24444	NM_111773		MT2A	ARABIDOPSIS THALIANA METALLOTHIONEIN-1|ARABIDOPSIS THALIANA METALLOTHIONEIN-K|ATMT-1|ATMT-K|metallothionein 2A	metallothionein 2A	protein-coding
merged_clf_H3K9_q_0.05_with_ctrl.peaks_peak_853	1	3832626	3833765	+	225	NA	exon (AT1G11380.1, exon 2 of 5)	exon (AT1G11380.1, exon 2 of 5)	632	AT1G11380.1	837680	At.42137	NM_101011		AT1G11380	T23J18.4|T23J18_4	PLAC8 family protein	protein-coding
merged_clf_H3K9_q_0.05_with_ctrl.peaks_peak_17494	5	17731764	17732649	+	225	NA	promoter-TSS (AT5G44063.1)	promoter-TSS (AT5G44063.1)	-113	AT5G44063.1	28721246		NM_001344530		AT5G44063	-	hypothetical protein	protein-coding
merged_clf_H3K9_q_0.05_with_ctrl.peaks_peak_6403	2	11752599	11753909	+	225	NA	exon (AT2G27500.2, exon 2 of 2)	exon (AT2G27500.2, exon 2 of 2)	513	AT2G27500.3	817295	At.24289	NM_128310		AT2G27500	F10A12.18|F10A12_18	Glycosyl hydrolase superfamily protein	protein-coding
merged_clf_H3K9_q_0.05_with_ctrl.peaks_peak_4681	1	28550488	28551690	+	225	NA	exon (AT1G76090.1, exon 1 of 1)	exon (AT1G76090.1, exon 1 of 1)	747	AT1G76090.1	843941	At.23490	NM_106258		SMT3	sterol methyltransferase 3	sterol methyltransferase 3	protein-coding
merged_clf_H3K9_q_0.05_with_ctrl.peaks_peak_16952	5	10940228	10940738	+	225	NA	exon (AT5G28920.1, exon 8 of 8)	exon (AT5G28920.1, exon 8 of 8)	450	AT5G28919.1	6240566	At.19745	NM_001125825		AT5G28919	-	hypothetical protein	protein-coding
merged_clf_H3K9_q_0.05_with_ctrl.peaks_peak_11902	4	246113	246741	+	225	NA	exon (AT4G00570.1, exon 2 of 19)	exon (AT4G00570.1, exon 2 of 19)	377	AT4G00570.1	828222	At.34536	NM_116281		NAD-ME2	F6N23.16|F6N23_16|NAD-dependent malic enzyme 2	NAD-dependent malic enzyme 2	protein-coding
merged_clf_H3K9_q_0.05_with_ctrl.peaks_peak_13960	4	14618389	14619493	+	225	NA	promoter-TSS (AT4G08245.2)	promoter-TSS (AT4G08245.2)	-195	AT4G08245.2	28719976		NR_142191		AT4G08245	-	ncRNA	ncRNA
merged_clf_H3K9_q_0.05_with_ctrl.peaks_peak_872	1	3945822	3946468	+	225	NA	exon (AT1G11700.1, exon 1 of 1)	exon (AT1G11700.1, exon 1 of 1)	561	AT1G11700.1	837714	At.24842	NM_101042		AT1G11700	F25C20.15|F25C20_15	senescence regulator (Protein of unknown function, DUF584)	protein-coding
merged_clf_H3K9_q_0.05_with_ctrl.peaks_peak_13231	4	11211971	11212601	+	225	NA	exon (AT4G20960.1, exon 1 of 3)	exon (AT4G20960.1, exon 1 of 3)	1042	AT4G20960.1	827843	At.32681	NM_118214		PyrD	T13K14.120|T13K14_120|pyrimidine deaminase	Cytidine/deoxycytidylate deaminase family protein	protein-coding
merged_clf_H3K9_q_0.05_with_ctrl.peaks_peak_16502	5	7273211	7274271	+	225	NA	exon (AT5G21990.1, exon 2 of 11)	exon (AT5G21990.1, exon 2 of 11)	670	AT5G21990.1	832259	At.20053	NM_147882		TPR7	AtTPR7|OEP61|outer envelope protein 61|tetratricopeptide repeat 7	Tetratricopeptide repeat (TPR)-like superfamily protein	protein-coding
merged_clf_H3K9_q_0.05_with_ctrl.peaks_peak_7805	2	18618404	18620215	+	225	NA	exon (AT2G45160.1, exon 1 of 1)	exon (AT2G45160.1, exon 1 of 1)	1142	AT2G45160.1	819124	At.27046	NM_130079		HAM1	ARABIDOPSIS THALIANA HAIRY MERISTEM 1|ATHAM1|HAIRY MERISTEM 1|LOM1|LOST MERISTEMS 1|SCARECROW-LIKE 27|SCL27|T14P1.3	GRAS family transcription factor	protein-coding
merged_clf_H3K9_q_0.05_with_ctrl.peaks_peak_18877	5	25034941	25035412	+	225	NA	TTS (AT5G62340.1)	TTS (AT5G62340.1)	950	AT5G09055.1	28721051		NR_143160		AT5G09055	-	ncRNA	ncRNA
merged_clf_H3K9_q_0.05_with_ctrl.peaks_peak_13446	4	12299846	12300759	+	225	NA	intron (AT4G23570.2, intron 1 of 9)	intron (AT4G23570.2, intron 1 of 9)	424	AT4G23570.3	828457	At.27360	NM_118488		SGT1A	F9D16.40|F9D16_40	phosphatase-like protein	protein-coding
merged_clf_H3K9_q_0.05_with_ctrl.peaks_peak_15211	5	1305222	1305953	+	225	NA	intron (AT5G04550.1, intron 1 of 1)	intron (AT5G04550.1, intron 1 of 1)	558	AT5G04550.2	830334	At.27330	NM_120537		AT5G04550	T32M21.140|T32M21_140	type-1 restriction enzyme mjaxp r protein (DUF668)	protein-coding
merged_clf_H3K9_q_0.05_with_ctrl.peaks_peak_7662	2	18046683	18047349	+	225	NA	TTS (AT2G43465.3)	TTS (AT2G43465.3)	385	AT2G43460.1	818947	At.12192	NM_129907		AT2G43460	T1O24.20	Ribosomal L38e protein family	protein-coding
merged_clf_H3K9_q_0.05_with_ctrl.peaks_peak_16572	5	7665010	7667060	+	225	NA	intron (AT5G22920.1, intron 6 of 11)	intron (AT5G22920.1, intron 6 of 11)	1164	AT5G22920.2	832356	At.19948	NM_122198		AT5G22920	AtRZPF34|MRN17.15|MRN17_15|RING zinc-finger protein 34|RZPF34	CHY-type/CTCHY-type/RING-type Zinc finger protein	protein-coding
merged_clf_H3K9_q_0.05_with_ctrl.peaks_peak_8153	3	317467	318190	+	225	NA	promoter-TSS (AT3G01910.3)	promoter-TSS (AT3G01910.3)	-397	AT3G01910.1	820118	At.24506	NM_111057		SOX	AT-SO|AtSO|F28J7.38|F28J7_38|SULFITE OXIDASE|sulfite oxidase	sulfite oxidase	protein-coding
merged_clf_H3K9_q_0.05_with_ctrl.peaks_peak_12203	4	2228701	2229229	+	225	NA	promoter-TSS (AT4G04480.1)	promoter-TSS (AT4G04480.1)	315	AT4G04470.2	825777	At.20045	NM_116685		PMP22	22-KD PEROXISOMAL MEMBRANE PROTEIN|T26N6.9|T26N6_9	Peroxisomal membrane 22 kDa (Mpv17/PMP22) family protein	protein-coding
merged_clf_H3K9_q_0.05_with_ctrl.peaks_peak_2635	1	15977095	15978139	+	225	NA	TTS (AT1G42540.3)	TTS (AT1G42540.3)	812	AT1G42550.1	840860	At.43829	NM_103439		PMI1	PLASTID MOVEMENT IMPAIRED1|T8D8.2|T8D8_2	plastid movement impaired1	protein-coding
merged_clf_H3K9_q_0.05_with_ctrl.peaks_peak_7862	2	18839613	18840692	+	225	NA	promoter-TSS (AT2G45730.1)	promoter-TSS (AT2G45730.1)	477	AT2G45740.1	819182	At.12700	NM_130137		PEX11D	F4I18.28|peroxin 11D	peroxin 11D	protein-coding
merged_clf_H3K9_q_0.05_with_ctrl.peaks_peak_999	1	4512826	4513893	+	225	NA	intron (AT1G13210.1, intron 1 of 10)	intron (AT1G13210.1, intron 1 of 10)	651	AT1G13210.1	837881	At.27871	NM_101192		ACA.l	F3F19.24|F3F19_24|autoinhibited Ca2+/ATPase II	autoinhibited Ca2+/ATPase II	protein-coding
merged_clf_H3K9_q_0.05_with_ctrl.peaks_peak_12045	4	915037	916467	+	225	NA	intron (AT4G02075.2, intron 2 of 4)	intron (AT4G02075.2, intron 2 of 4)	757	AT4G02075.3	828146	At.11152	NM_116439		PIT1	pitchoun 1	RING/FYVE/PHD zinc finger superfamily protein	protein-coding
merged_clf_H3K9_q_0.05_with_ctrl.peaks_peak_9755	3	7445884	7446881	+	225	NA	exon (AT3G21220.1, exon 1 of 2)	exon (AT3G21220.1, exon 1 of 2)	651	AT3G21220.2	821676	At.24898	NM_113017		MKK5	ARABIDOPSIS THALIANA MITOGEN-ACTIVATED PROTEIN KINASE KINASE 5|ATMAP2K_ALPHA|ATMEK5|ATMKK5|MAP KINASE KINASE 5|MAP kinase kinase 5|MAP2K_A|MEK5	MAP kinase kinase 5	protein-coding
merged_clf_H3K9_q_0.05_with_ctrl.peaks_peak_6966	2	14856916	14857889	+	225	NA	exon (AT2G35270.1, exon 1 of 1)	exon (AT2G35270.1, exon 1 of 1)	738	AT2G35270.1	818094	At.66313	NM_129079		GIK	AHL21|AT-hook motif nuclear localized protein 21|GIANT KILLER|T4C15.6|T4C15_6	Putative AT-hook DNA-binding family protein	protein-coding
merged_clf_H3K9_q_0.05_with_ctrl.peaks_peak_12954	4	9665325	9665878	+	225	NA	TTS (AT4G17240.2)	TTS (AT4G17240.2)	-1792	AT4G17230.1	827435	At.25323	NM_117828		SCL13	DL4650C|FCAALL.225|SCARECROW-like 13	SCARECROW-like 13	protein-coding
merged_clf_H3K9_q_0.05_with_ctrl.peaks_peak_4587	1	28144221	28144899	+	225	NA	promoter-TSS (AT1G74929.1)	promoter-TSS (AT1G74929.1)	-462	AT1G74929.1	6240887	At.73806	NM_001124129		AT1G74929	-	hypothetical protein	protein-coding
merged_clf_H3K9_q_0.05_with_ctrl.peaks_peak_10573	3	17352319	17352801	+	225	NA	intron (AT3G47120.1, intron 1 of 4)	intron (AT3G47120.1, intron 1 of 4)	278	AT3G47120.1	823865	At.35841	NM_114579		AT3G47120	-	RNA recognition motif (RRM)-containing protein	protein-coding
merged_clf_H3K9_q_0.05_with_ctrl.peaks_peak_7303	2	16430761	16431778	+	225	NA	exon (AT2G39350.1, exon 1 of 1)	exon (AT2G39350.1, exon 1 of 1)	1482	AT2G39350.1	818520	At.48570	NM_129492		ABCG1	ATP-binding cassette G1|T16B24.1|T16B24_1	ABC-2 type transporter family protein	protein-coding
merged_clf_H3K9_q_0.05_with_ctrl.peaks_peak_2456	1	11820829	11821725	+	225	NA	exon (AT1G32690.1, exon 1 of 1)	exon (AT1G32690.1, exon 1 of 1)	547	AT1G32690.1	840163	At.43689	NM_103003		AT1G32690	F6N18.23|F6N18_23	DUF740 family protein	protein-coding
merged_clf_H3K9_q_0.05_with_ctrl.peaks_peak_18315	5	22429039	22429469	+	225	NA	TTS (AT5G55310.1)	TTS (AT5G55310.1)	241	AT5G55300.3	835623	At.197	NM_124912		TOP1ALPHA	DNA topoisomerase 1 beta|DNA topoisomerase I alpha|MGO1|MGOUN 1|MTE17.1|MTE17_1|TOP1|TOP1BETA|TOPOISOMERASE 1	DNA topoisomerase I alpha	protein-coding
merged_clf_H3K9_q_0.05_with_ctrl.peaks_peak_503	1	2200155	2200703	+	224	NA	promoter-TSS (AT1G07160.1)	promoter-TSS (AT1G07160.1)	255	AT1G07170.4	837228	At.12753	NM_100591		AT1G07170	F10K1.35	PHF5-like protein	protein-coding
merged_clf_H3K9_q_0.05_with_ctrl.peaks_peak_12952	4	9662502	9663787	+	224	NA	intron (AT4G17230.1, intron 1 of 1)	intron (AT4G17230.1, intron 1 of 1)	650	AT4G17230.2	827435	At.25323	NM_117828		SCL13	DL4650C|FCAALL.225|SCARECROW-like 13	SCARECROW-like 13	protein-coding
merged_clf_H3K9_q_0.05_with_ctrl.peaks_peak_15477	5	2503342	2504040	+	224	NA	intron (AT5G07830.1, intron 1 of 9)	intron (AT5G07830.1, intron 1 of 9)	566	AT5G07830.1	830676	At.620	NM_120865		GUS2	AtGUS2|F13G24.30|glucuronidase 2	glucuronidase 2	protein-coding
merged_clf_H3K9_q_0.05_with_ctrl.peaks_peak_17046	5	14651022	14651611	+	224	NA	intron (AT5G37070.1, intron 1 of 2)	intron (AT5G37070.1, intron 1 of 2)	403	AT5G37070.1	833678	At.30516	NM_123066		AT5G37070	MJG14.7|MJG14_7	hypothetical protein (Protein of unknown function, DUF538)	protein-coding
merged_clf_H3K9_q_0.05_with_ctrl.peaks_peak_11954	4	472513	473762	+	224	NA	exon (AT4G01090.1, exon 2 of 5)	exon (AT4G01090.1, exon 2 of 5)	742	AT4G01090.1	827898	At.28429	NM_116339		AT4G01090	F2N1.13|F2N1_13	hypothetical protein (DUF3133)	protein-coding
merged_clf_H3K9_q_0.05_with_ctrl.peaks_peak_9264	3	5061956	5063838	+	224	NA	exon (AT3G15030.2, exon 2 of 3)	exon (AT3G15030.2, exon 2 of 3)	1216	AT3G15030.1	820732	At.23764	NM_112365		TCP4	MEE35|TCP family transcription factor 4|maternal effect embryo arrest 35	TCP family transcription factor 4	protein-coding
merged_clf_H3K9_q_0.05_with_ctrl.peaks_peak_3666	1	23497011	23497755	+	224	NA	promoter-TSS (AT1G08607.1)	promoter-TSS (AT1G08607.1)	248	AT1G63350.1	842641	At.66084	NM_105014		AT1G63350	F9N12.3|F9N12_3	Disease resistance protein (CC-NBS-LRR class) family	protein-coding
merged_clf_H3K9_q_0.05_with_ctrl.peaks_peak_13454	4	12362437	12363760	+	224	NA	exon (AT4G23730.2, exon 1 of 6)	exon (AT4G23730.2, exon 1 of 6)	614	AT4G23730.3	828473	At.32410	NM_118504		AT4G23730	F9D16.200|F9D16_200	Galactose mutarotase-like superfamily protein	protein-coding
merged_clf_H3K9_q_0.05_with_ctrl.peaks_peak_13398	4	12061204	12062813	+	224	NA	intron (AT4G23010.1, intron 1 of 6)	intron (AT4G23010.1, intron 1 of 6)	749	AT4G23010.2	828400	At.23149	NM_118430		UTR2	ATUTR2|F7H19.200|F7H19_200|UDP-galactose transporter 2	UDP-galactose transporter 2	protein-coding
merged_clf_H3K9_q_0.05_with_ctrl.peaks_peak_6461	2	12114103	12115478	+	224	NA	exon (AT2G28350.1, exon 1 of 4)	exon (AT2G28350.1, exon 1 of 4)	728	AT2G28350.2	817382	At.13730	NM_128394		ARF10	T1B3.13|T1B3_13|auxin response factor 10	auxin response factor 10	protein-coding
merged_clf_H3K9_q_0.05_with_ctrl.peaks_peak_8046	2	19594424	19594941	+	224	NA	promoter-TSS (AT2G47850.3)	promoter-TSS (AT2G47850.3)	319	AT2G47840.1	819396	At.12945	NM_130351		Tic20-II	AtTic20-II|F17A22.23|translocon at the inner envelope membrane of chloroplasts 20-II	Uncharacterized conserved protein ycf60	protein-coding
merged_clf_H3K9_q_0.05_with_ctrl.peaks_peak_9761	3	7474742	7475491	+	224	NA	exon (AT3G21270.1, exon 1 of 1)	exon (AT3G21270.1, exon 1 of 1)	572	AT3G21270.1	821681	At.257	NM_113022		DOF2	ADOF2|DOF zinc finger protein 2	DOF zinc finger protein 2	protein-coding
merged_clf_H3K9_q_0.05_with_ctrl.peaks_peak_14855	4	18383065	18383746	+	224	NA	TTS (AT4G39570.1)	TTS (AT4G39570.1)	480	AT4G39560.1	830110	At.43033	NM_120116		AT4G39560	F23K16.190|F23K16_190	Galactose oxidase/kelch repeat superfamily protein	protein-coding
merged_clf_H3K9_q_0.05_with_ctrl.peaks_peak_18354	5	22657420	22657969	+	224	NA	TTS (AT5G55950.2)	TTS (AT5G55950.2)	390	AT5G55940.1	835692	At.20183	NM_124976		emb2731	MYN21.5|MYN21_5|embryo defective 2731	Uncharacterized protein family (UPF0172)	protein-coding
merged_clf_H3K9_q_0.05_with_ctrl.peaks_peak_10704	3	18091290	18092270	+	224	NA	intron (AT3G48780.1, intron 10 of 12)	intron (AT3G48780.1, intron 10 of 12)	-1487	AT3G48790.2	824040		NM_114738		AT3G48790	-	Pyridoxal phosphate (PLP)-dependent transferases superfamily protein	protein-coding
merged_clf_H3K9_q_0.05_with_ctrl.peaks_peak_17590	5	18369182	18370986	+	224	NA	exon (AT5G45340.1, exon 3 of 6)	exon (AT5G45340.1, exon 3 of 6)	937	AT5G45340.1	834570	At.9625	NM_123902		CYP707A3	''cytochrome P450|K9E15.12|K9E15_12|cytochrome P450|family 707|polypeptide 3|polypeptide 3''|subfamily A	cytochrome P450, family 707, subfamily A, polypeptide 3	protein-coding
merged_clf_H3K9_q_0.05_with_ctrl.peaks_peak_1146	1	5076382	5077788	+	224	NA	exon (AT1G14740.1, exon 1 of 2)	exon (AT1G14740.1, exon 1 of 2)	896	AT1G14740.1	838039	At.24757	NM_101343		TTA1	F10B6.14|F10B6_14|TITANIA 1	class I heat shock protein, putative (DUF1423)	protein-coding
merged_clf_H3K9_q_0.05_with_ctrl.peaks_peak_9266	3	5069230	5069903	+	224	NA	TTS (AT3G15070.2)	TTS (AT3G15070.2)	462	AT3G15060.1	820735	At.24446	NM_112368		RABA1g	AtRABA1g|RAB GTPase homolog A1G	RAB GTPase homolog A1G	protein-coding
merged_clf_H3K9_q_0.05_with_ctrl.peaks_peak_9434	3	5755881	5757111	+	224	NA	exon (AT3G16857.3, exon 1 of 6)	exon (AT3G16857.3, exon 1 of 6)	140	AT3G16857.3	820940	At.183	NM_112561		RR1	ARR1|response regulator 1	response regulator 1	protein-coding
merged_clf_H3K9_q_0.05_with_ctrl.peaks_peak_15042	5	471552	472563	+	224	NA	intron (AT5G02290.2, intron 2 of 6)	intron (AT5G02290.2, intron 2 of 6)	717	AT5G02290.1	831880	At.21647	NM_120307		NAK	PROTEIN KINASE NAK|T1E22.50|T1E22_50	Protein kinase superfamily protein	protein-coding
merged_clf_H3K9_q_0.05_with_ctrl.peaks_peak_12358	4	5843009	5843384	+	224	NA	TTS (AT4G09160.1)	TTS (AT4G09160.1)	587	AT4G09170.1	826498	At.68683	NM_116986		AT4G09170	T8A17.80|T8A17_80	transmembrane protein	protein-coding
merged_clf_H3K9_q_0.05_with_ctrl.peaks_peak_6702	2	13488800	13489624	+	224	NA	promoter-TSS (AT2G31730.2)	promoter-TSS (AT2G31730.2)	467	AT2G31730.1	817730	At.38180	NM_128731		AT2G31730	T9H9.27	basic helix-loop-helix (bHLH) DNA-binding superfamily protein	protein-coding
merged_clf_H3K9_q_0.05_with_ctrl.peaks_peak_17673	5	18860351	18861087	+	224	NA	exon (AT5G46510.1, exon 1 of 9)	exon (AT5G46510.1, exon 1 of 9)	268	AT5G46510.1	834694	At.29951	NM_124021		AT5G46510	K11I1.10|K11I1_10|VARIATION IN COMPOUND TRIGGERED ROOT growth response-like|VICTL	Disease resistance protein (TIR-NBS-LRR class) family	protein-coding
merged_clf_H3K9_q_0.05_with_ctrl.peaks_peak_15271	5	1541366	1542384	+	224	NA	TTS (AT5G01005.1)	TTS (AT5G01005.1)	657	AT5G05190.1	830401	At.22863	NM_120601		AT5G05190	K2A11.6|K2A11_6	hypothetical protein (DUF3133)	protein-coding
merged_clf_H3K9_q_0.05_with_ctrl.peaks_peak_15177	5	1145538	1146541	+	224	NA	exon (AT5G04170.1, exon 1 of 5)	exon (AT5G04170.1, exon 1 of 5)	608	AT5G04170.1	830295	At.19699	NM_120499		AT5G04170	F21E1.90|F21E1_90	Calcium-binding EF-hand family protein	protein-coding
merged_clf_H3K9_q_0.05_with_ctrl.peaks_peak_3372	1	21529938	21530453	+	224	NA	promoter-TSS (AT1G58150.1)	promoter-TSS (AT1G58150.1)	92	AT1G58150.1	842182	At.66052	NM_104596		AT1G58150	T15M6.2	phosphoglycerate kinase	protein-coding
merged_clf_H3K9_q_0.05_with_ctrl.peaks_peak_9228	3	4906923	4907943	+	224	NA	promoter-TSS (AT3G14590.5)	promoter-TSS (AT3G14590.5)	-10	AT3G14590.5	820685	At.39207	NM_112319		NTMC2T6.2	NTMC2TYPE6.2	Calcium-dependent lipid-binding (CaLB domain) family protein	protein-coding
merged_clf_H3K9_q_0.05_with_ctrl.peaks_peak_4512	1	27833682	27834115	+	224	NA	exon (AT1G74010.1, exon 1 of 3)	exon (AT1G74010.1, exon 1 of 3)	309	AT1G74010.1	843739	At.34933	NM_106060		AT1G74010	F2P9.12|F2P9_12	Calcium-dependent phosphotriesterase superfamily protein	protein-coding
merged_clf_H3K9_q_0.05_with_ctrl.peaks_peak_9158	3	4533964	4535056	+	224	NA	exon (AT3G13790.5, exon 2 of 6)	exon (AT3G13790.5, exon 2 of 6)	1069	AT3G13790.5	820591	At.24308	NM_112232		ATBFRUCT1	ARABIDOPSIS THALIANA CELL WALL INVERTASE 1|ATCWINV1	Glycosyl hydrolases family 32 protein	protein-coding
merged_clf_H3K9_q_0.05_with_ctrl.peaks_peak_13096	4	10352629	10353216	+	223	NA	exon (AT4G18890.2, exon 1 of 2)	exon (AT4G18890.2, exon 1 of 2)	536	AT4G18890.1	827623	At.32859	NM_118005		BEH3	BES1/BZR1 homolog 3|F13C5.60|F13C5_60	BES1/BZR1 homolog 3	protein-coding
merged_clf_H3K9_q_0.05_with_ctrl.peaks_peak_4390	1	27372290	27373208	+	223	NA	TTS (AT1G72700.1)	TTS (AT1G72700.1)	552	AT1G72710.1	843603	At.19326	NM_105930		CKL2	F28P22.10|F28P22_10|casein kinase 1-like protein 2	casein kinase 1-like protein 2	protein-coding
merged_clf_H3K9_q_0.05_with_ctrl.peaks_peak_16461	5	7084014	7084716	+	223	NA	exon (AT5G20885.1, exon 1 of 1)	exon (AT5G20885.1, exon 1 of 1)	494	AT5G20885.1	832212	At.26270	NM_122096		AT5G20885	-	RING/U-box superfamily protein	protein-coding
merged_clf_H3K9_q_0.05_with_ctrl.peaks_peak_9798	3	7682284	7683003	+	223	NA	promoter-TSS (AT3G21800.1)	promoter-TSS (AT3G21800.1)	4	AT3G04165.1	28718728		NR_141070		AT3G04165	-	ncRNA	ncRNA
merged_clf_H3K9_q_0.05_with_ctrl.peaks_peak_9248	3	4988109	4988692	+	223	NA	intron (AT3G14840.2, intron 1 of 23)	intron (AT3G14840.2, intron 1 of 23)	293	AT3G14840.1	820713	At.46496	NM_112345		AT3G14840	LIK1|LysM RLK1-interacting kinase 1	Leucine-rich repeat transmembrane protein kinase	protein-coding
merged_clf_H3K9_q_0.05_with_ctrl.peaks_peak_13709	4	13512064	13513213	+	223	NA	exon (AT4G26890.1, exon 1 of 1)	exon (AT4G26890.1, exon 1 of 1)	801	AT4G26890.1	828796	At.32136	NM_118823		MAPKKK16	F10M23.230|F10M23_230|mitogen-activated protein kinase kinase kinase 16	mitogen-activated protein kinase kinase kinase 16	protein-coding
merged_clf_H3K9_q_0.05_with_ctrl.peaks_peak_7472	2	17172675	17173107	+	223	NA	promoter-TSS (AT2G41210.1)	promoter-TSS (AT2G41210.1)	-483	AT2G41210.1	818720	At.13170	NM_129686		PIP5K5	T3K9.2|T3K9_2|phosphatidylinositol- 4-phosphate 5-kinase 5	phosphatidylinositol- 4-phosphate 5-kinase 5	protein-coding
merged_clf_H3K9_q_0.05_with_ctrl.peaks_peak_4754	1	28873664	28875297	+	223	NA	promoter-TSS (AT1G76892.1)	promoter-TSS (AT1G76892.1)	-211	AT1G76892.1	28717431		NR_139959		AT1G76892	-	ncRNA	ncRNA
merged_clf_H3K9_q_0.05_with_ctrl.peaks_peak_13269	4	11426054	11426868	+	223	NA	TTS (AT4G21445.1)	TTS (AT4G21445.1)	438	AT4G21450.2	826300	At.28664	NM_118265		AT4G21450	F18E5.70|F18E5_70	PapD-like superfamily protein	protein-coding
merged_clf_H3K9_q_0.05_with_ctrl.peaks_peak_8925	3	3576032	3576804	+	223	NA	TTS (AT3G11395.1)	TTS (AT3G11395.1)	401	AT3G11397.1	2745881	At.23273	NM_202553		PRA1.A3	prenylated RAB acceptor 1.A3	prenylated RAB acceptor 1.A3	protein-coding
merged_clf_H3K9_q_0.05_with_ctrl.peaks_peak_11351	3	21139056	21140436	+	223	NA	exon (AT3G57120.1, exon 1 of 1)	exon (AT3G57120.1, exon 1 of 1)	925	AT3G57120.1	824879	At.34868	NM_115571		AT3G57120	-	Protein kinase superfamily protein	protein-coding
merged_clf_H3K9_q_0.05_with_ctrl.peaks_peak_7733	2	18309277	18309925	+	223	NA	promoter-TSS (AT2G44330.1)	promoter-TSS (AT2G44330.1)	457	AT2G44320.1	3768738				AT2G44320	19115.TRNA-SER-1	tRNA	tRNA
merged_clf_H3K9_q_0.05_with_ctrl.peaks_peak_16212	5	5902878	5904346	+	223	NA	exon (AT5G17860.1, exon 1 of 1)	exon (AT5G17860.1, exon 1 of 1)	768	AT5G17860.2	831654	At.9244	NM_121792		CAX7	MPI7.2|calcium exchanger 7	calcium exchanger 7	protein-coding
merged_clf_H3K9_q_0.05_with_ctrl.peaks_peak_15909	5	4455404	4456310	+	223	NA	exon (AT5G13810.1, exon 2 of 2)	exon (AT5G13810.1, exon 2 of 2)	709	AT5G13810.1	831226	At.21450	NM_121384		AT5G13810	MAC12.24|MAC12_24	Glutaredoxin family protein	protein-coding
merged_clf_H3K9_q_0.05_with_ctrl.peaks_peak_1319	1	5763204	5764054	+	223	NA	exon (AT1G16840.1, exon 1 of 3)	exon (AT1G16840.1, exon 1 of 3)	480	AT1G16840.2	838255	At.16054	NM_101545		AT1G16840	F17F16.27	hypothetical protein	protein-coding
merged_clf_H3K9_q_0.05_with_ctrl.peaks_peak_17324	5	16738219	16739451	+	223	NA	intron (AT5G41810.2, intron 1 of 1)	intron (AT5G41810.2, intron 1 of 1)	768	AT5G41810.1	834186	At.26146	NM_123546		AT5G41810	K16L22.9|K16L22_9	Avr9/Cf-9 rapidly elicited protein	protein-coding
merged_clf_H3K9_q_0.05_with_ctrl.peaks_peak_7983	2	19336783	19338505	+	223	NA	intron (AT2G47070.2, intron 2 of 10)	intron (AT2G47070.2, intron 2 of 10)	949	AT2G47070.2	819321	At.12581	NM_180137		SPL1	F14M4.10|SQUAMOSA PROMOTER BINDING PROTEIN-LIKE 1|squamosa promoter binding protein-like 1	squamosa promoter binding protein-like 1	protein-coding
merged_clf_H3K9_q_0.05_with_ctrl.peaks_peak_10285	3	10934304	10934818	+	222	NA	Intergenic	Intergenic	1595	AT3G28918.1	6241089	At.69177	NM_001125262		AT3G28918	-	hypothetical protein	protein-coding
merged_clf_H3K9_q_0.05_with_ctrl.peaks_peak_12078	4	1072526	1073457	+	222	NA	TTS (AT4G02430.4)	TTS (AT4G02430.4)	615	AT4G02440.1	828008	At.3886	NM_116477		EID1	EMPFINDLICHER IM DUNKELROTEN LICHT 1|T14P8.22|T14P8_22	F-box family protein	protein-coding
merged_clf_H3K9_q_0.05_with_ctrl.peaks_peak_12006	4	711946	712505	+	222	NA	promoter-TSS (AT4G03955.1)	promoter-TSS (AT4G03955.1)	-117	AT4G03955.1	28719528		NR_141765		AT4G03955	-	ncRNA	ncRNA
merged_clf_H3K9_q_0.05_with_ctrl.peaks_peak_12000	4	687588	688144	+	222	NA	promoter-TSS (AT4G03925.1)	promoter-TSS (AT4G03925.1)	-32	AT4G03925.1	28719527		NR_141761		AT4G03925	-	ncRNA	ncRNA
merged_clf_H3K9_q_0.05_with_ctrl.peaks_peak_1367	1	5969236	5969917	+	222	NA	intron (AT1G17410.1, intron 1 of 4)	intron (AT1G17410.1, intron 1 of 4)	400	AT1G17410.1	838313	At.41837	NM_101602		AT1G17410	F28G4.12|F28G4_12	Nucleoside diphosphate kinase family protein	protein-coding
merged_clf_H3K9_q_0.05_with_ctrl.peaks_peak_5488	2	5597836	5598290	+	222	NA	TTS (AT2G13450.1)	TTS (AT2G13450.1)	349	AT2G13440.1	815830	At.27893	NM_126930		AT2G13440	T26C18.3|T26C18_3	glucose-inhibited division family A protein	protein-coding
merged_clf_H3K9_q_0.05_with_ctrl.peaks_peak_17	1	74054	74740	+	222	NA	promoter-TSS (AT1G04013.1)	promoter-TSS (AT1G04013.1)	-38	AT1G04013.1	28716034		NR_138632		AT1G04013	-	ncRNA	ncRNA
merged_clf_H3K9_q_0.05_with_ctrl.peaks_peak_18027	5	20921463	20922127	+	222	NA	intron (AT5G51510.1, intron 2 of 5)	intron (AT5G51510.1, intron 2 of 5)	418	AT5G51510.1	835225	At.24851	NM_124530		AT5G51510	K17N15.6|K17N15_6	jagunal-like protein	protein-coding
merged_clf_H3K9_q_0.05_with_ctrl.peaks_peak_14875	4	18477054	18477922	+	222	NA	exon (AT4G39820.2, exon 1 of 2)	exon (AT4G39820.2, exon 1 of 2)	481	AT4G39820.1	830141	At.2300	NM_120145		AT4G39820	T5J17.8	Tetratricopeptide repeat (TPR)-like superfamily protein	protein-coding
merged_clf_H3K9_q_0.05_with_ctrl.peaks_peak_13496	4	12520179	12520814	+	222	NA	TTS (AT4G24100.2)	TTS (AT4G24100.2)	402	AT4G24110.1	828511	At.32377	NM_118543		AT4G24110	T19F6.100|T19F6_100	NADP-specific glutamate dehydrogenase	protein-coding
merged_clf_H3K9_q_0.05_with_ctrl.peaks_peak_19132	5	25944496	25945397	+	222	NA	TTS (AT5G09285.1)	TTS (AT5G09285.1)	496	AT5G64920.1	836616	At.7851	NM_125891		CIP8	COP1-INTERACTING PROTEIN CIP8|COP1-interacting protein 8|MXK3.15|MXK3_15	COP1-interacting protein 8	protein-coding
merged_clf_H3K9_q_0.05_with_ctrl.peaks_peak_14576	4	17306061	17307385	+	222	NA	promoter-TSS (AT4G36720.1)	promoter-TSS (AT4G36720.1)	965	AT4G36710.1	829824	At.31304	NM_119835		HAM4	AP22.56|AP22_56|Arabidopsis thaliana HAIRY MERISTEM 4|AtHAM4	GRAS family transcription factor	protein-coding
merged_clf_H3K9_q_0.05_with_ctrl.peaks_peak_16123	5	5431678	5433173	+	222	NA	exon (AT5G16590.1, exon 1 of 3)	exon (AT5G16590.1, exon 1 of 3)	841	AT5G16590.1	831521	At.8850	NM_121665		AT5G16590	LRR1|Leucine rich repeat protein 1|MTG13.3|MTG13_3	Leucine-rich repeat protein kinase family protein	protein-coding
merged_clf_H3K9_q_0.05_with_ctrl.peaks_peak_6708	2	13522473	13523753	+	222	NA	promoter-TSS (AT2G31810.1)	promoter-TSS (AT2G31810.1)	805	AT2G31800.1	817737	At.13938	NM_128738		AT2G31800	F20M17.16|F20M17_16	Integrin-linked protein kinase family	protein-coding
merged_clf_H3K9_q_0.05_with_ctrl.peaks_peak_15010	5	375259	376175	+	222	NA	promoter-TSS (AT5G01970.2)	promoter-TSS (AT5G01970.2)	509	AT5G01980.1	831911	At.28192	NM_120276		AT5G01980	T7H20.30|T7H20_30	RING/U-box superfamily protein	protein-coding
merged_clf_H3K9_q_0.05_with_ctrl.peaks_peak_6033	2	9696189	9696644	+	222	NA	TTS (AT2G22795.3)	TTS (AT2G22795.3)	584	AT2G22790.1	816809	At.52870	NM_127844		AT2G22790	T30L20.5|T30L20_5	hypothetical protein	protein-coding
merged_clf_H3K9_q_0.05_with_ctrl.peaks_peak_15627	5	3179009	3179399	+	222	NA	exon (AT5G10140.4, exon 1 of 6)	exon (AT5G10140.4, exon 1 of 6)	244	AT5G10140.3	830878	At.1629	NM_121052		FLC	AGAMOUS-like 25|AGL25|FLF|FLOWERING LOCUS C|FLOWERING LOCUS F|MADS BOX PROTEIN FLOWERING LOCUS F|REDUCED STEM BRANCHING 6|RSB6|T31P16.130|T31P16_130	K-box region and MADS-box transcription factor family protein	protein-coding
merged_clf_H3K9_q_0.05_with_ctrl.peaks_peak_1195	1	5240866	5241472	+	222	NA	TTS (AT1G15230.1)	TTS (AT1G15230.1)	369	AT1G15220.1	838089	At.26582	NM_101390		CCMH	ATCCMH|F9L1.17|F9L1_17	cytochrome c biogenesis protein family	protein-coding
merged_clf_H3K9_q_0.05_with_ctrl.peaks_peak_11261	3	20775439	20775728	+	222	NA	promoter-TSS (AT3G55980.2)	promoter-TSS (AT3G55980.2)	-637	AT3G55980.2	824764	At.21697	NM_115456		SZF1	ATSZF1|salt-inducible zinc finger 1	salt-inducible zinc finger 1	protein-coding
merged_clf_H3K9_q_0.05_with_ctrl.peaks_peak_4160	1	26342012	26343083	+	222	NA	TTS (AT1G69940.1)	TTS (AT1G69940.1)	603	AT1G69935.2	843330	At.35361	NM_105662		SHW1	SHORT HYPOCOTYL IN WHITE LIGHT1	short hypocotyl in white light1	protein-coding
merged_clf_H3K9_q_0.05_with_ctrl.peaks_peak_7958	2	19191968	19192555	+	222	NA	exon (AT2G46710.1, exon 1 of 5)	exon (AT2G46710.1, exon 1 of 5)	1014	AT2G46710.1	819283	At.36471	NM_180127		ROPGAP3	ROP guanosine triphosphatase (GTPase)-activating protein 3|T3A4.9	Rho GTPase activating protein with PAK-box/P21-Rho-binding domain-containing protein	protein-coding
merged_clf_H3K9_q_0.05_with_ctrl.peaks_peak_3400	1	21727080	21727829	+	222	NA	exon (AT1G58470.2, exon 1 of 2)	exon (AT1G58470.2, exon 1 of 2)	473	AT1G58470.2	842216	At.17236	NM_104627		RBP1	ATRBP1|F9K23.11|F9K23_11|RNA-binding protein 1	RNA-binding protein 1	protein-coding
merged_clf_H3K9_q_0.05_with_ctrl.peaks_peak_17345	5	16826714	16827806	+	222	NA	exon (AT5G42090.1, exon 1 of 1)	exon (AT5G42090.1, exon 1 of 1)	718	AT5G42090.1	834214	At.21158	NM_123574		AT5G42090	MJC20.20|MJC20_20	Lung seven transmembrane receptor family protein	protein-coding
merged_clf_H3K9_q_0.05_with_ctrl.peaks_peak_5236	2	505510	506518	+	222	NA	exon (AT2G02070.2, exon 2 of 5)	exon (AT2G02070.2, exon 2 of 5)	639	AT2G02070.2	814738	At.13356	NM_126268		IDD5	AtIDD5|F5O4.16|F5O4_16|indeterminate(ID)-domain 5	indeterminate(ID)-domain 5	protein-coding
merged_clf_H3K9_q_0.05_with_ctrl.peaks_peak_12978	4	9739719	9740902	+	222	NA	exon (AT4G17460.1, exon 2 of 4)	exon (AT4G17460.1, exon 2 of 4)	792	AT4G17460.1	827457	At.19738	NM_117849		HAT1	DL4765W|FCAALL.65|HOMEOBOX PROTEIN|JAB|JAIBA	Homeobox-leucine zipper protein 4 (HB-4) / HD-ZIP protein	protein-coding
merged_clf_H3K9_q_0.05_with_ctrl.peaks_peak_3021	1	19475580	19476208	+	222	NA	intron (AT1G52300.1, intron 2 of 3)	intron (AT1G52300.1, intron 2 of 3)	340	AT1G52300.1	841660	At.21076	NM_104109		AT1G52300	F19K6.12|F19K6_12	Zinc-binding ribosomal protein family protein	protein-coding
merged_clf_H3K9_q_0.05_with_ctrl.peaks_peak_15137	5	877569	878227	+	222	NA	exon (AT5G03500.5, exon 2 of 6)	exon (AT5G03500.5, exon 2 of 6)	218	AT5G03500.7	831822	At.48976	NM_120430		AT5G03500	F12E4.280|F12E4_280	Mediator complex, subunit Med7	protein-coding
merged_clf_H3K9_q_0.05_with_ctrl.peaks_peak_206	1	846730	847623	+	221	NA	promoter-TSS (AT1G03410.2)	promoter-TSS (AT1G03410.2)	507	AT1G03410.1	838763	At.19920	NM_100223		2A6	F21B7.3	2-oxoglutarate (2OG) and Fe(II)-dependent oxygenase superfamily protein	protein-coding
merged_clf_H3K9_q_0.05_with_ctrl.peaks_peak_18379	5	22762567	22764489	+	221	NA	exon (AT5G56240.3, exon 2 of 4)	exon (AT5G56240.3, exon 2 of 4)	395	AT5G56240.4	835723	At.7071	NM_125007		AT5G56240	K24C1.5|K24C1_5	hapless protein	protein-coding
merged_clf_H3K9_q_0.05_with_ctrl.peaks_peak_7710	2	18237171	18238422	+	221	NA	TTS (AT2G44090.4)	TTS (AT2G44090.4)	1007	AT2G44080.1	819014	At.36798	NM_180078		ARL	ARGOS-like|F6E13.21	ARGOS-like protein	protein-coding
merged_clf_H3K9_q_0.05_with_ctrl.peaks_peak_6088	2	9942208	9942831	+	221	NA	promoter-TSS (AT2G23350.1)	promoter-TSS (AT2G23350.1)	-184	ENSRNA049757846-T1
merged_clf_H3K9_q_0.05_with_ctrl.peaks_peak_13037	4	10029207	10029860	+	221	NA	promoter-TSS (AT4G18070.1)	promoter-TSS (AT4G18070.1)	500	AT4G18060.1	827531	At.27424	NM_117916		AT4G18060	F15J5.30|F15J5_30	SH3 domain-containing protein	protein-coding
merged_clf_H3K9_q_0.05_with_ctrl.peaks_peak_13654	4	13240367	13241229	+	221	NA	exon (AT4G26130.1, exon 1 of 1)	exon (AT4G26130.1, exon 1 of 1)	739	AT4G26130.1	828719	At.25514	NM_118746		AT4G26130	F20B18.240|F20B18_240	cotton fiber protein	protein-coding
merged_clf_H3K9_q_0.05_with_ctrl.peaks_peak_2125	1	9723937	9724693	+	221	NA	intron (AT1G27910.1, intron 1 of 5)	intron (AT1G27910.1, intron 1 of 5)	485	AT1G27910.1	839684	At.22435	NM_102556		PUB45	ARABIDOPSIS THALIANA PLANT U-BOX 45|ATPUB45|F13K9.2|F13K9_2|plant U-box 45	plant U-box 45	protein-coding
merged_clf_H3K9_q_0.05_with_ctrl.peaks_peak_7115	2	15522971	15523684	+	221	NA	promoter-TSS (AT2G36960.2)	promoter-TSS (AT2G36960.2)	-142	AT2G36960.2	818270	At.27079	NM_179942		TKI1	T1J8.14|T1J8_14|TSL-kinase interacting protein 1	TSL-kinase interacting protein 1	protein-coding
merged_clf_H3K9_q_0.05_with_ctrl.peaks_peak_19100	5	25836640	25837831	+	221	NA	TTS (AT5G64630.1)	TTS (AT5G64630.1)	721	AT5G64640.1	836585	At.28947	NM_125860		AT5G64640	MUB3.16|MUB3_16	Plant invertase/pectin methylesterase inhibitor superfamily	protein-coding
merged_clf_H3K9_q_0.05_with_ctrl.peaks_peak_6214	2	10753860	10754744	+	221	NA	promoter-TSS (AT2G25240.1)	promoter-TSS (AT2G25240.1)	700	AT2G25250.1	817063	At.25269	NM_128082		AT2G25250	T22F11.16|T22F11_16	serine/arginine repetitive matrix-like protein	protein-coding
merged_clf_H3K9_q_0.05_with_ctrl.peaks_peak_12411	4	6375234	6376101	+	221	NA	promoter-TSS (AT4G05775.1)	promoter-TSS (AT4G05775.1)	475	AT4G10280.1	826620	At.48840	NM_117096		AT4G10280	T9A4.15	RmlC-like cupins superfamily protein	protein-coding
merged_clf_H3K9_q_0.05_with_ctrl.peaks_peak_9704	3	7116230	7117322	+	221	NA	exon (AT3G20410.1, exon 1 of 8)	exon (AT3G20410.1, exon 1 of 8)	708	AT3G20410.2	821586	At.8182	NM_112932		CPK9	calmodulin-domain protein kinase 9	calmodulin-domain protein kinase 9	protein-coding
merged_clf_H3K9_q_0.05_with_ctrl.peaks_peak_8166	3	364716	365220	+	221	NA	promoter-TSS (AT3G02090.2)	promoter-TSS (AT3G02090.2)	408	AT3G02080.1	821120	At.24575	NM_111074		AT3G02080	F1C9.13|F1C9_13	Ribosomal protein S19e family protein	protein-coding
merged_clf_H3K9_q_0.05_with_ctrl.peaks_peak_7045	2	15150688	15151368	+	221	NA	exon (AT2G36080.1, exon 1 of 3)	exon (AT2G36080.1, exon 1 of 3)	547	AT2G36080.2	818181	At.23308	NM_129167		ABS2	ABNORMAL SHOOT 2|F9C22.1|NGAL1|NGATHA-Like 1	AP2/B3-like transcriptional factor family protein	protein-coding
merged_clf_H3K9_q_0.05_with_ctrl.peaks_peak_6728	2	13632744	13633307	+	221	NA	exon (AT2G32030.1, exon 1 of 1)	exon (AT2G32030.1, exon 1 of 1)	526	AT2G32030.1	817763	At.13600	NM_128763		AT2G32030	F22D22.22|F22D22_22	Acyl-CoA N-acyltransferases (NAT) superfamily protein	protein-coding
merged_clf_H3K9_q_0.05_with_ctrl.peaks_peak_12921	4	9504690	9505710	+	221	NA	exon (AT4G16890.5, exon 1 of 6)	exon (AT4G16890.5, exon 1 of 6)	255	AT4G16890.3	827397	At.43451	NM_001341145		SNC1	BAL|BALL|CONSTITUTIVE 1|DL4475C|FCAALL.51|SUPPRESSOR OF NPR1-1	TIR-NBS-LRR class disease resistance protein	protein-coding
merged_clf_H3K9_q_0.05_with_ctrl.peaks_peak_1210	1	5295901	5296890	+	221	NA	TTS (AT1G15390.1)	TTS (AT1G15390.1)	429	AT1G15400.3	838110	At.11423	NM_101409		AT1G15400	F9L1.35|F9L1_35	hypothetical protein	protein-coding
merged_clf_H3K9_q_0.05_with_ctrl.peaks_peak_7608	2	17836750	17837230	+	221	NA	exon (AT2G42870.1, exon 1 of 1)	exon (AT2G42870.1, exon 1 of 1)	628	AT2G42870.1	818887	At.43188	NM_129848		PAR1	F7D19.13|F7D19_13|HELIX-LOOP-HELIX 1|HLH1|PHY RAPIDLY REGULATED 1	phy rapidly regulated 1	protein-coding
merged_clf_H3K9_q_0.05_with_ctrl.peaks_peak_14354	4	16370676	16371361	+	221	NA	intron (AT4G34180.1, intron 1 of 6)	intron (AT4G34180.1, intron 1 of 6)	511	AT4G34180.1	829566	At.24487	NM_119581		AT4G34180	F10M10.6	Cyclase family protein	protein-coding
merged_clf_H3K9_q_0.05_with_ctrl.peaks_peak_15269	5	1534339	1535408	+	221	NA	exon (AT5G05170.1, exon 3 of 15)	exon (AT5G05170.1, exon 3 of 15)	685	AT5G05170.1	830399	At.24338	NM_120599		CEV1	ATCESA3|ATH-B|CELLULOSE SYNTHASE 3|CESA3|CONSTITUTIVE EXPRESSION OF VSP 1|ECTOPIC LIGNIFICATION 1|ELI1|ISOXABEN RESISTANT 1|ISOXABEN RESISTANT 1|IXR1|K2A11.4|K2A11_4|MRE1|multiple response expansion 1	Cellulose synthase family protein	protein-coding
merged_clf_H3K9_q_0.05_with_ctrl.peaks_peak_10125	3	9711369	9712641	+	221	NA	exon (AT3G26510.7, exon 1 of 2)	exon (AT3G26510.7, exon 1 of 2)	236	AT3G26512.1	28719323		NM_001338811		AT3G26512	-	hypothetical protein	protein-coding
merged_clf_H3K9_q_0.05_with_ctrl.peaks_peak_7517	2	17421778	17422482	+	221	NA	exon (AT2G41760.1, exon 1 of 6)	exon (AT2G41760.1, exon 1 of 6)	441	AT2G41760.1	818775	At.48579	NM_129740		AT2G41760	T11A7.14|T11A7_14	amino-terminal glutamine amidohydrolase	protein-coding
merged_clf_H3K9_q_0.05_with_ctrl.peaks_peak_5186	2	255488	257500	+	221	NA	exon (AT2G01570.1, exon 1 of 1)	exon (AT2G01570.1, exon 1 of 1)	1074	AT2G01570.1	814686	At.24012	NM_126218		RGA1	F2I9.19|F2I9_19|REPRESSOR OF GA|REPRESSOR OF GA1-3 1|RGA	GRAS family transcription factor family protein	protein-coding
merged_clf_H3K9_q_0.05_with_ctrl.peaks_peak_12016	4	756498	757289	+	221	NA	exon (AT4G01750.1, exon 1 of 4)	exon (AT4G01750.1, exon 1 of 4)	545	AT4G01750.1	827905	At.3842	NM_116405		RGXT2	T7B11.1|rhamnogalacturonan xylosyltransferase 2	rhamnogalacturonan xylosyltransferase 2	protein-coding
merged_clf_H3K9_q_0.05_with_ctrl.peaks_peak_18345	5	22603463	22604423	+	221	NA	intron (AT5G55850.2, intron 2 of 3)	intron (AT5G55850.2, intron 2 of 3)	567	AT5G55850.2	835679	At.9528	NM_124967		NOI	MWJ3.3|MWJ3_3|NOI PROTEIN	RPM1-interacting protein 4 (RIN4) family protein	protein-coding
merged_clf_H3K9_q_0.05_with_ctrl.peaks_peak_13132	4	10498901	10500346	+	221	NA	intron (AT4G19200.1, intron 2 of 2)	intron (AT4G19200.1, intron 2 of 2)	875	AT4G19200.1	827660	At.43017	NM_118040		AT4G19200	T18B16.170|T18B16_170	proline-rich family protein	protein-coding
merged_clf_H3K9_q_0.05_with_ctrl.peaks_peak_10345	3	11974073	11975068	+	221	NA	exon (AT3G30380.2, exon 1 of 6)	exon (AT3G30380.2, exon 1 of 6)	561	AT3G30380.1	822739	At.53597	NM_113937		AT3G30380	-	alpha/beta-Hydrolases superfamily protein	protein-coding
merged_clf_H3K9_q_0.05_with_ctrl.peaks_peak_960	1	4348577	4349518	+	221	NA	promoter-TSS (AT1G12750.1)	promoter-TSS (AT1G12750.1)	549	AT1G12760.1	837832	At.43884	NM_101146		AT1G12760	T12C24.29|T12C24_29	Zinc finger, C3HC4 type (RING finger) family protein	protein-coding
merged_clf_H3K9_q_0.05_with_ctrl.peaks_peak_2568	1	12867237	12867931	+	221	NA	exon (AT1G35160.1, exon 1 of 4)	exon (AT1G35160.1, exon 1 of 4)	458	AT1G35160.2	840403	At.22949	NM_103213		GF14 PHI	14-3-3 PROTEIN G-BOX FACTOR14 PHI|14-3-3PHI|GENERAL REGULATORY FACTOR 4|GF14 protein phi chain|GRF4|T32G9.30|T32G9_30	GF14 protein phi chain	protein-coding
merged_clf_H3K9_q_0.05_with_ctrl.peaks_peak_13760	4	13750566	13751841	+	220	NA	exon (AT4G27520.1, exon 2 of 2)	exon (AT4G27520.1, exon 2 of 2)	900	AT4G27520.1	828861	At.2793	NM_118887		ENODL2	AtENODL2|early nodulin-like protein 2	early nodulin-like protein 2	protein-coding
merged_clf_H3K9_q_0.05_with_ctrl.peaks_peak_18776	5	24590145	24590621	+	220	NA	promoter-TSS (AT5G61130.1)	promoter-TSS (AT5G61130.1)	384	AT5G61140.1	836235	At.46196	NM_125507		AT5G61140	MAF19.14|MAF19_14	U5 small nuclear ribonucleoprotein helicase	protein-coding
merged_clf_H3K9_q_0.05_with_ctrl.peaks_peak_18433	5	23056500	23057729	+	220	NA	TTS (AT5G56985.1)	TTS (AT5G56985.1)	628	AT5G56980.1	835800	At.7095	NM_125080		AT5G56980	MHM17.10|MHM17_10	cotton fiber protein	protein-coding
merged_clf_H3K9_q_0.05_with_ctrl.peaks_peak_17183	5	15851389	15852132	+	220	NA	exon (AT5G39590.1, exon 2 of 7)	exon (AT5G39590.1, exon 2 of 7)	371	AT5G39590.1	833955	At.21744	NM_123321		AT5G39590	MIJ24.8|MIJ24_8	TLD-domain containing nucleolar protein	protein-coding
merged_clf_H3K9_q_0.05_with_ctrl.peaks_peak_5899	2	8948609	8949373	+	220	NA	promoter-TSS (AT2G20784.1)	promoter-TSS (AT2G20784.1)	426	AT2G20780.2	816607	At.27138	NM_127643		AT2G20780	F5H14.25|F5H14_25	Major facilitator superfamily protein	protein-coding
merged_clf_H3K9_q_0.05_with_ctrl.peaks_peak_4671	1	28526085	28526757	+	220	NA	exon (AT1G75990.1, exon 2 of 7)	exon (AT1G75990.1, exon 2 of 7)	427	AT1G75990.1	843931	At.15402	NM_106248		AT1G75990	T4O12.21|T4O12_21	PAM domain (PCI/PINT associated module) protein	protein-coding
merged_clf_H3K9_q_0.05_with_ctrl.peaks_peak_7952	2	19163769	19164231	+	220	NA	promoter-TSS (AT2G09745.1)	promoter-TSS (AT2G09745.1)	100	AT2G09745.1	28718208		NR_140594		AT2G09745	-	ncRNA	ncRNA
merged_clf_H3K9_q_0.05_with_ctrl.peaks_peak_15708	5	3510283	3511607	+	220	NA	exon (AT5G11060.1, exon 1 of 6)	exon (AT5G11060.1, exon 1 of 6)	1112	AT5G11060.1	830973	At.5377	NM_121144		KNAT4	KNOTTED1-like homeobox gene 4|T5K6.50|T5K6_50	homeobox protein knotted-1-like 4	protein-coding
merged_clf_H3K9_q_0.05_with_ctrl.peaks_peak_9425	3	5705804	5706736	+	220	NA	TTS (AT3G16760.1)	TTS (AT3G16760.1)	729	AT3G16770.1	820929	At.24773	NM_112550		EBP	ATEBP|ERF72|ETHYLENE RESPONSE FACTOR 72|MGL6.1|RAP2.3|RELATED TO AP2 3|ethylene-responsive element binding protein	ethylene-responsive element binding protein	protein-coding
merged_clf_H3K9_q_0.05_with_ctrl.peaks_peak_9637	3	6780657	6782878	+	220	NA	exon (AT3G19540.1, exon 2 of 3)	exon (AT3G19540.1, exon 2 of 3)	1204	AT3G19540.1	821490	At.21232	NM_112843		AT3G19540	-	glutamyl-tRNA (Gln) amidotransferase subunit A (DUF620)	protein-coding
merged_clf_H3K9_q_0.05_with_ctrl.peaks_peak_12291	4	4804453	4805253	+	220	NA	exon (AT4G07960.1, exon 2 of 6)	exon (AT4G07960.1, exon 2 of 6)	484	AT4G07960.2	826301	At.33785	NM_116866		CSLC12	ATCSLC12|CELLULOSE-SYNTHASE LIKE C12|Cellulose-synthase-like C12|F1K3.3|F1K3_3	Cellulose-synthase-like C12	protein-coding
merged_clf_H3K9_q_0.05_with_ctrl.peaks_peak_19213	5	26281776	26283983	+	220	NA	exon (AT5G65700.2, exon 1 of 3)	exon (AT5G65700.2, exon 1 of 3)	1168	AT5G65700.2	836699	At.1921	NM_125967		BAM1	BARELY ANY MERISTEM 1|MPA24.5|MPA24_5	Leucine-rich receptor-like protein kinase family protein	protein-coding
merged_clf_H3K9_q_0.05_with_ctrl.peaks_peak_16480	5	7172726	7173933	+	220	NA	promoter-TSS (AT5G21105.2)	promoter-TSS (AT5G21105.2)	-597	AT5G21105.2	832235	At.22575	NM_147871		AT5G21105	-	Plant L-ascorbate oxidase	protein-coding
merged_clf_H3K9_q_0.05_with_ctrl.peaks_peak_17572	5	18218734	18219664	+	220	NA	exon (AT5G45100.2, exon 1 of 1)	exon (AT5G45100.2, exon 1 of 1)	596	AT5G45100.1	834543	At.26652	NM_123878		BRG1	BOI-related gene 1|K17O22.9|K17O22_9	SBP (S-ribonuclease binding protein) family protein	protein-coding
merged_clf_H3K9_q_0.05_with_ctrl.peaks_peak_7017	2	15042209	15043073	+	220	NA	TTS (AT2G35790.1)	TTS (AT2G35790.1)	466	AT2G35795.1	818152	At.37624	NM_129138		AT2G35795	T20F21.1|T20F21_1	Chaperone DnaJ-domain superfamily protein	protein-coding
merged_clf_H3K9_q_0.05_with_ctrl.peaks_peak_13677	4	13375153	13375965	+	220	NA	TTS (AT4G07655.1)	TTS (AT4G07655.1)	466	AT4G07655.1	28719935		NR_142151		AT4G07655	-	ncRNA	ncRNA
merged_clf_H3K9_q_0.05_with_ctrl.peaks_peak_19282	5	26496203	26497812	+	220	NA	exon (AT5G66320.1, exon 2 of 3)	exon (AT5G66320.1, exon 2 of 3)	841	AT5G66320.2	836764	At.28170	NM_126030		GATA5	GATA transcription factor 5|K1L20.10|K1L20_10	GATA transcription factor 5	protein-coding
merged_clf_H3K9_q_0.05_with_ctrl.peaks_peak_17422	5	17340347	17341440	+	220	NA	exon (AT5G43190.1, exon 1 of 1)	exon (AT5G43190.1, exon 1 of 1)	921	AT5G43190.1	834337	At.27993	NM_123685		AT5G43190	MNL12.1|MNL12_1	Galactose oxidase/kelch repeat superfamily protein	protein-coding
merged_clf_H3K9_q_0.05_with_ctrl.peaks_peak_12332	4	5703404	5704059	+	220	NA	exon (AT4G08900.1, exon 2 of 6)	exon (AT4G08900.1, exon 2 of 6)	420	AT4G08900.1	826468	At.1554	NM_116959		ARGAH1	arginine amidohydrolase 1	arginase	protein-coding
merged_clf_H3K9_q_0.05_with_ctrl.peaks_peak_4618	1	28241169	28242515	+	220	NA	exon (AT1G75240.1, exon 2 of 2)	exon (AT1G75240.1, exon 2 of 2)	831	AT1G75240.1	843861	At.34802	NM_106180		HB33	AtHB33|F22H5.4|F22H5_4|ZHD5|homeobox protein 33|zinc-finger homeodomain 5	homeobox protein 33	protein-coding
merged_clf_H3K9_q_0.05_with_ctrl.peaks_peak_11540	3	22121047	22121526	+	220	NA	exon (AT3G59880.1, exon 1 of 1)	exon (AT3G59880.1, exon 1 of 1)	410	AT3G59880.1	825158	At.54010	NM_115851		AT3G59880	-	hypothetical protein	protein-coding
merged_clf_H3K9_q_0.05_with_ctrl.peaks_peak_3079	1	19849894	19851756	+	220	NA	exon (AT1G53230.2, exon 1 of 1)	exon (AT1G53230.2, exon 1 of 1)	610	AT1G53230.2	841756	At.10667	NM_104201		TCP3	F12M16.13|F12M16_13|TEOSINTE BRANCHED 1|cycloidea and PCF transcription factor 3	TEOSINTE BRANCHED 1, cycloidea and PCF transcription factor 3	protein-coding
merged_clf_H3K9_q_0.05_with_ctrl.peaks_peak_17282	5	16447246	16448100	+	220	NA	TTS (AT5G41090.1)	TTS (AT5G41090.1)	488	AT5G41100.1	834112	At.43503	NM_123475		AT5G41100	MEE6.17|MEE6_17	hydroxyproline-rich glycoprotein family protein	protein-coding
merged_clf_H3K9_q_0.05_with_ctrl.peaks_peak_8424	3	1466636	1467240	+	220	NA	exon (AT3G05170.1, exon 1 of 2)	exon (AT3G05170.1, exon 1 of 2)	455	AT3G05170.1	819681	At.18376	NM_111390		AT3G05170	T12H1.14|T12H1_14	Phosphoglycerate mutase family protein	protein-coding
merged_clf_H3K9_q_0.05_with_ctrl.peaks_peak_19142	5	25982400	25982827	+	220	NA	exon (AT5G65050.4, exon 1 of 6)	exon (AT5G65050.4, exon 1 of 6)	324	AT5G65050.2	836629	At.49225	NM_125904		AGL31	AGAMOUS-like 31|MADS AFFECTING FLOWERING 2|MAF2|MXK3.30|MXK3_30	AGAMOUS-like 31	protein-coding
merged_clf_H3K9_q_0.05_with_ctrl.peaks_peak_2883	1	18496602	18497204	+	220	NA	intron (AT1G49950.2, intron 1 of 6)	intron (AT1G49950.2, intron 1 of 6)	284	AT1G49950.3	841418	At.27250	NM_103882		TRB1	ATTRB1|F2J10.16|F2J10_16|TELOMERE REPEAT BINDING FACTOR 1|telomere repeat binding factor 1	telomere repeat binding factor 1	protein-coding
merged_clf_H3K9_q_0.05_with_ctrl.peaks_peak_11919	4	320294	320894	+	220	NA	intron (AT4G00752.1, intron 1 of 9)	intron (AT4G00752.1, intron 1 of 9)	341	AT4G00752.1	825947	At.45840	NM_148183		AT4G00752	-	UBX domain-containing protein	protein-coding
merged_clf_H3K9_q_0.05_with_ctrl.peaks_peak_4047	1	25788623	25789833	+	220	NA	exon (AT1G68690.1, exon 1 of 9)	exon (AT1G68690.1, exon 1 of 9)	628	AT1G68690.4	3767664	At.11547	NM_105541		PERK9	AtPERK9|F24J5.8|F24J5_8|proline-rich extensin-like receptor kinase 9	Protein kinase superfamily protein	protein-coding
merged_clf_H3K9_q_0.05_with_ctrl.peaks_peak_1958	1	8907651	8909108	+	220	NA	exon (AT1G25390.1, exon 1 of 4)	exon (AT1G25390.1, exon 1 of 4)	950	AT1G25390.1	839125	At.17321	NM_102350		AT1G25390	F2J7.14|F2J7_14	Protein kinase superfamily protein	protein-coding
merged_clf_H3K9_q_0.05_with_ctrl.peaks_peak_13409	4	12135220	12136119	+	220	NA	exon (AT4G23170.1, exon 1 of 1)	exon (AT4G23170.1, exon 1 of 1)	696	AT4G23170.1	828416	At.2195	NM_118446		EP1	CRK9|CYSTEINE-RICH RLK (RECEPTOR-LIKE PROTEIN KINASE) 9|F21P8.60|F21P8_60	receptor-like protein kinase-related family protein	protein-coding
merged_clf_H3K9_q_0.05_with_ctrl.peaks_peak_6534	2	12618099	12618896	+	220	NA	TTS (AT2G29410.1)	TTS (AT2G29410.1)	236	AT2G08340.1	28717937		NR_140322		AT2G08340	-	ncRNA	ncRNA
merged_clf_H3K9_q_0.05_with_ctrl.peaks_peak_7890	2	18950881	18951356	+	220	NA	promoter-TSS (AT2G46080.1)	promoter-TSS (AT2G46080.1)	316	AT2G46090.1	819217	At.13073	NM_130172		LCBK2	T3F17.26|long-chain base (LCB) kinase 2	Diacylglycerol kinase family protein	protein-coding
merged_clf_H3K9_q_0.05_with_ctrl.peaks_peak_222	1	898932	899693	+	220	NA	exon (AT1G03600.1, exon 1 of 1)	exon (AT1G03600.1, exon 1 of 1)	832	AT1G03600.1	839449	At.15585	NM_100240		PSB27	F21B7.21	photosystem II family protein	protein-coding
merged_clf_H3K9_q_0.05_with_ctrl.peaks_peak_1032	1	4593900	4594313	+	220	NA	exon (AT1G13390.1, exon 1 of 3)	exon (AT1G13390.1, exon 1 of 3)	345	AT1G13390.1	837899	At.43692	NM_101209		AT1G13390	T6J4.14|T6J4_14	translocase subunit seca	protein-coding
merged_clf_H3K9_q_0.05_with_ctrl.peaks_peak_14755	4	17999188	18001755	+	220	NA	exon (AT4G38470.3, exon 5 of 15)	exon (AT4G38470.3, exon 5 of 15)	1389	AT4G38470.2	830003	At.22724	NM_120008		STY46	F20M13.30|F20M13_30|serine/threonine/tyrosine kinase 46	ACT-like protein tyrosine kinase family protein	protein-coding
merged_clf_H3K9_q_0.05_with_ctrl.peaks_peak_3839	1	24552059	24552674	+	219	NA	exon (AT1G65960.3, exon 2 of 5)	exon (AT1G65960.3, exon 2 of 5)	363	AT1G65960.2	842908	At.19149	NM_105268		GAD2	F12P19.12|F12P19_12|GLUTAMATE DECARBOXYLASE 2|glutamate decarboxylase 2	glutamate decarboxylase 2	protein-coding
merged_clf_H3K9_q_0.05_with_ctrl.peaks_peak_8425	3	1477321	1478480	+	219	NA	exon (AT3G05200.1, exon 1 of 1)	exon (AT3G05200.1, exon 1 of 1)	940	AT3G05200.1	819684	At.22987	NM_111393		ATL6	Arabidopsis toxicos en levadura 6|T12H1.17|T12H1_17	RING/U-box superfamily protein	protein-coding
merged_clf_H3K9_q_0.05_with_ctrl.peaks_peak_10873	3	18973600	18974397	+	219	NA	exon (AT3G51080.1, exon 3 of 3)	exon (AT3G51080.1, exon 3 of 3)	872	AT3G51080.1	824272	At.27088	NM_114968		GATA6	GATA transcription factor 6	GATA transcription factor 6	protein-coding
merged_clf_H3K9_q_0.05_with_ctrl.peaks_peak_10730	3	18240791	18241176	+	219	NA	exon (AT3G49210.1, exon 1 of 7)	exon (AT3G49210.1, exon 1 of 7)	358	AT3G49210.2	824082	At.35633	NM_114780		AT3G49210	-	O-acyltransferase (WSD1-like) family protein	protein-coding
merged_clf_H3K9_q_0.05_with_ctrl.peaks_peak_10267	3	10673787	10674367	+	219	NA	promoter-TSS (AT3G28460.3)	promoter-TSS (AT3G28460.3)	66	AT3G28460.3	822476	At.42673	NM_113766		AT3G28460	-	methyltransferase	protein-coding
merged_clf_H3K9_q_0.05_with_ctrl.peaks_peak_17401	5	17198438	17199751	+	219	NA	exon (AT5G42900.3, exon 2 of 5)	exon (AT5G42900.3, exon 2 of 5)	699	AT5G42900.3	834301	At.30148	NM_123655		COR27	MBD2.9|MBD2_9|cold regulated gene 27	cold regulated protein 27	protein-coding
merged_clf_H3K9_q_0.05_with_ctrl.peaks_peak_14883	4	18506028	18506671	+	219	NA	TTS (AT4G39880.1)	TTS (AT4G39880.1)	430	AT4G39890.1	830148	At.2863	NM_120152		RABH1c	AtRABH1c|RAB GTPase homolog H1C|T5J17.60|T5J17_60	RAB GTPase homolog H1C	protein-coding
merged_clf_H3K9_q_0.05_with_ctrl.peaks_peak_5277	2	831752	832434	+	219	NA	exon (AT2G02860.2, exon 1 of 14)	exon (AT2G02860.2, exon 1 of 14)	526	AT2G02860.2	814817	At.10182	NM_126341		SUT2	ARABIDOPSIS THALIANA SUCROSE TRANSPORTER 3|ATSUC3|ATSUT2|SUC3|SUCROSE TRANSPORTER 3|T17M13.3|T17M13_3|sucrose transporter 2	sucrose transporter 2	protein-coding
merged_clf_H3K9_q_0.05_with_ctrl.peaks_peak_10253	3	10505846	10507372	+	219	NA	exon (AT3G28180.1, exon 1 of 4)	exon (AT3G28180.1, exon 1 of 4)	898	AT3G28180.1	822444	At.23682	NM_113737		CSLC04	ATCSLC04|ATCSLC4|CELLULOSE-SYNTHASE LIKE C4|CSLC4|Cellulose-synthase-like C4	Cellulose-synthase-like C4	protein-coding
merged_clf_H3K9_q_0.05_with_ctrl.peaks_peak_5456	2	3669953	3670484	+	219	NA	exon (AT2G09795.3, exon 2 of 2)	exon (AT2G09795.3, exon 2 of 2)	2010	AT2G09795.1	5007869		NR_140603		AT2G09795	-	ncRNA	ncRNA
merged_clf_H3K9_q_0.05_with_ctrl.peaks_peak_13101	4	10370753	10371399	+	219	NA	TTS (AT4G18920.1)	TTS (AT4G18920.1)	643	AT4G18930.1	827628	At.29	NM_118010		AT4G18930	F13C5.100|F13C5_100	RNA ligase/cyclic nucleotide phosphodiesterase family protein	protein-coding
merged_clf_H3K9_q_0.05_with_ctrl.peaks_peak_1171	1	5168668	5170577	+	219	NA	TTS (AT1G05137.1)	TTS (AT1G05137.1)	685	AT1G05137.1	28716254		NR_138842		AT1G05137	-	ncRNA	ncRNA
merged_clf_H3K9_q_0.05_with_ctrl.peaks_peak_4164	1	26363686	26364689	+	219	NA	exon (AT1G70000.2, exon 2 of 4)	exon (AT1G70000.2, exon 2 of 4)	572	AT1G70000.2	843337	At.35354	NM_105669		AT1G70000	F20P5.26|F20P5_26	myb-like transcription factor family protein	protein-coding
merged_clf_H3K9_q_0.05_with_ctrl.peaks_peak_6982	2	14908885	14909774	+	219	NA	intron (AT2G35470.1, intron 1 of 2)	intron (AT2G35470.1, intron 1 of 2)	534	AT2G35470.1	818112	At.43650	NM_129099		AT2G35470	T32F12.15|T32F12_15	ribosome maturation factor	protein-coding
merged_clf_H3K9_q_0.05_with_ctrl.peaks_peak_16959	5	12079680	12080627	+	219	NA	intron (AT5G32450.1, intron 3 of 7)	intron (AT5G32450.1, intron 3 of 7)	625	AT5G32450.1	833204	At.30677	NM_122824		AT5G32450	F18O9.60|F18O9_60	RNA binding (RRM/RBD/RNP motifs) family protein	protein-coding
merged_clf_H3K9_q_0.05_with_ctrl.peaks_peak_18544	5	23515209	23516001	+	219	NA	TTS (AT5G58100.2)	TTS (AT5G58100.2)	455	AT5G58110.1	835923	At.28648	NM_125196		AT5G58110	K21L19.11|K21L19_11	chaperone binding / ATPase activator	protein-coding
merged_clf_H3K9_q_0.05_with_ctrl.peaks_peak_8365	3	1228605	1229359	+	219	NA	TTS (AT3G01495.1)	TTS (AT3G01495.1)	769	AT3G01495.1	28718489		NR_140834		AT3G01495	-	ncRNA	ncRNA
merged_clf_H3K9_q_0.05_with_ctrl.peaks_peak_13129	4	10491068	10491701	+	219	NA	exon (AT4G19185.1, exon 1 of 7)	exon (AT4G19185.1, exon 1 of 7)	334	AT4G19185.2	827657	At.27366	NM_118038		UMAMIT2	Usually multiple acids move in and out Transporters 2	nodulin MtN21 /EamA-like transporter family protein	protein-coding
merged_clf_H3K9_q_0.05_with_ctrl.peaks_peak_2310	1	10854636	10855597	+	219	NA	promoter-TSS (AT1G30620.6)	promoter-TSS (AT1G30620.6)	-4	AT1G30620.5	839942	At.20201	NM_102799		MUR4	HIGH SUGAR RESPONSE8|HSR8|MURUS 4|T5I8.7|T5I8_7|UDP-D-XYLOSE 4-EPIMERASE 1|UXE1	NAD(P)-binding Rossmann-fold superfamily protein	protein-coding
merged_clf_H3K9_q_0.05_with_ctrl.peaks_peak_13464	4	12407761	12408321	+	219	NA	promoter-TSS (AT4G23860.2)	promoter-TSS (AT4G23860.2)	380	AT4G23850.1	828484	At.3384	NM_118516		LACS4	T32A16.20|T32A16_20|long-chain acyl-CoA synthetase 4	AMP-dependent synthetase and ligase family protein	protein-coding
merged_clf_H3K9_q_0.05_with_ctrl.peaks_peak_923	1	4194685	4196145	+	219	NA	exon (AT1G12330.1, exon 2 of 3)	exon (AT1G12330.1, exon 2 of 3)	995	AT1G12330.1	837787	At.42080	NM_101105		AT1G12330	F5O11.6|F5O11_6	cyclin-dependent kinase-like protein	protein-coding
merged_clf_H3K9_q_0.05_with_ctrl.peaks_peak_19091	5	25810244	25810832	+	218	NA	promoter-TSS (AT5G64560.1)	promoter-TSS (AT5G64560.1)	240	AT5G64572.1	5008331		NR_143370		AT5G64572	-	ncRNA	ncRNA
merged_clf_H3K9_q_0.05_with_ctrl.peaks_peak_16972	5	13360517	13361347	+	218	NA	exon (AT5G35100.3, exon 2 of 3)	exon (AT5G35100.3, exon 2 of 3)	458	AT5G35100.2	833461	At.27662	NM_122901		AT5G35100	F7N22.3|F7N22_3	Cyclophilin-like peptidyl-prolyl cis-trans isomerase family protein	protein-coding
merged_clf_H3K9_q_0.05_with_ctrl.peaks_peak_1853	1	8168192	8169175	+	218	NA	exon (AT1G23050.1, exon 1 of 1)	exon (AT1G23050.1, exon 1 of 1)	240	AT1G23050.1	838913	At.41571	NM_102153		AT1G23050	F19G10.1	hydroxyproline-rich glycoprotein family protein	protein-coding
merged_clf_H3K9_q_0.05_with_ctrl.peaks_peak_476	1	2090221	2091413	+	218	NA	TTS (AT1G04513.1)	TTS (AT1G04513.1)	869	AT1G06800.2	837191	At.26438	NM_100557		PLA-I{gamma}1	DAD1-Like Lipase 4|DALL4|F4H5.11|F4H5_11|phospholipase A I gamma 1	alpha/beta-Hydrolases superfamily protein	protein-coding
merged_clf_H3K9_q_0.05_with_ctrl.peaks_peak_16207	5	5865830	5866603	+	218	NA	TTS (AT5G17780.2)	TTS (AT5G17780.2)	593	AT5G17770.1	831645	At.43640	NM_121783		CBR	ATCBR|CBR1|NADH:CYTOCHROME B5 REDUCTASE 1|NADH:cytochrome B5 reductase 1	NADH:cytochrome B5 reductase 1	protein-coding
merged_clf_H3K9_q_0.05_with_ctrl.peaks_peak_8968	3	3714211	3714537	+	218	NA	TTS (AT3G11750.1)	TTS (AT3G11750.1)	205	AT3G11745.2	820347	At.39702	NM_112007		AT3G11745	-	transmembrane protein	protein-coding
merged_clf_H3K9_q_0.05_with_ctrl.peaks_peak_11122	3	20065715	20066579	+	218	NA	exon (AT3G54200.1, exon 1 of 1)	exon (AT3G54200.1, exon 1 of 1)	540	AT3G54200.1	824587	At.27525	NM_115280		AT3G54200	-	Late embryogenesis abundant (LEA) hydroxyproline-rich glycoprotein family	protein-coding
merged_clf_H3K9_q_0.05_with_ctrl.peaks_peak_2699	1	17090940	17091337	+	218	NA	promoter-TSS (AT1G07293.1)	promoter-TSS (AT1G07293.1)	326	AT1G45163.1	10723049	At.75682	NM_001198227		AT1G45163	-	transmembrane protein	protein-coding
merged_clf_H3K9_q_0.05_with_ctrl.peaks_peak_2121	1	9675162	9676153	+	218	NA	intron (AT1G27770.3, intron 1 of 5)	intron (AT1G27770.3, intron 1 of 5)	500	AT1G27770.2	839670	At.21941	NM_102542		ACA1	CA2+-ATPASE|PEA1|PLASTID ENVELOPE ATPASE 1|T22C5.23|T22C5_23|autoinhibited Ca2+-ATPase 1	autoinhibited Ca2+-ATPase 1	protein-coding
merged_clf_H3K9_q_0.05_with_ctrl.peaks_peak_17825	5	19676104	19676868	+	218	NA	intron (AT5G48545.1, intron 1 of 6)	intron (AT5G48545.1, intron 1 of 6)	1034	AT5G48545.2	2746201	At.44264	NM_203178		HINT3	histidine triad nucleotide-binding 3	histidine triad nucleotide-binding 3	protein-coding
merged_clf_H3K9_q_0.05_with_ctrl.peaks_peak_19257	5	26416143	26416756	+	218	NA	promoter-TSS (AT5G09565.1)	promoter-TSS (AT5G09565.1)	-110	AT5G09565.1	28721111		NR_143221		AT5G09565	-	ncRNA	ncRNA
merged_clf_H3K9_q_0.05_with_ctrl.peaks_peak_9988	3	8947161	8947925	+	218	NA	exon (AT3G24530.2, exon 1 of 6)	exon (AT3G24530.2, exon 1 of 6)	416	AT3G24530.2	822048	At.6250	NM_113364		AT3G24530	-	AAA-type ATPase family protein / ankyrin repeat family protein	protein-coding
merged_clf_H3K9_q_0.05_with_ctrl.peaks_peak_1743	1	7712890	7713415	+	218	NA	promoter-TSS (AT1G21928.1)	promoter-TSS (AT1G21928.1)	333	AT1G21930.1	838795	At.41635	NM_102041		AT1G21930	T26F17.22|T26F17_22	transmembrane protein	protein-coding
merged_clf_H3K9_q_0.05_with_ctrl.peaks_peak_18616	5	23783969	23785196	+	218	NA	exon (AT5G58900.1, exon 1 of 2)	exon (AT5G58900.1, exon 1 of 2)	930	AT5G58900.1	836007	At.7757	NM_125280		AT5G58900	K19M22.10|K19M22_10	Homeodomain-like transcriptional regulator	protein-coding
merged_clf_H3K9_q_0.05_with_ctrl.peaks_peak_13909	4	14423064	14423498	+	218	NA	TTS (AT4G29250.1)	TTS (AT4G29250.1)	322	AT4G29260.1	829047	At.4537	NM_119070		AT4G29260	F17A13.80|F17A13_80	HAD superfamily, subfamily IIIB acid phosphatase	protein-coding
merged_clf_H3K9_q_0.05_with_ctrl.peaks_peak_8470	3	1619139	1620608	+	218	NA	promoter-TSS (AT3G01655.1)	promoter-TSS (AT3G01655.1)	525	AT3G05580.2	819724	At.40648	NM_111431		TOPP9	F18C1.15|F18C1_15|type one protein phosphatase 9	Calcineurin-like metallo-phosphoesterase superfamily protein	protein-coding
merged_clf_H3K9_q_0.05_with_ctrl.peaks_peak_11643	3	22603024	22604504	+	218	NA	TTS (AT3G61070.3)	TTS (AT3G61070.3)	854	AT3G61060.2	825278	At.44960	NM_115970		PP2-A13	AtPP2-A13|phloem protein 2-A13	phloem protein 2-A13	protein-coding
merged_clf_H3K9_q_0.05_with_ctrl.peaks_peak_16285	5	6229664	6230489	+	218	NA	intron (AT5G18680.2, intron 1 of 4)	intron (AT5G18680.2, intron 1 of 4)	554	AT5G18680.1	831986	At.31402	NM_121873		TLP11	AtTLP11|T1A4.60|T1A4_60|tubby like protein 11	tubby like protein 11	protein-coding
merged_clf_H3K9_q_0.05_with_ctrl.peaks_peak_16027	5	4980522	4981249	+	218	NA	exon (AT5G15330.1, exon 1 of 3)	exon (AT5G15330.1, exon 1 of 3)	463	AT5G15330.1	831385	At.1776	NM_121537		SPX4	ARABIDOPSIS THALIANA SPX DOMAIN GENE 4|ATSPX4|F8M21.220|F8M21_220|SPX domain gene 4	SPX domain-containing protein 4	protein-coding
merged_clf_H3K9_q_0.05_with_ctrl.peaks_peak_17473	5	17666236	17666831	+	218	NA	TTS (AT5G43910.5)	TTS (AT5G43910.5)	430	AT5G43900.1	834412	At.9049	NM_123757		MYA2	ARABIDOPSIS MYOSIN 2|ATMYA2|F6B6.4|F6B6_4|MYOSIN X1 2|MYOSIN XI-6|XI-2|XI-6|myosin 2	myosin 2	protein-coding
merged_clf_H3K9_q_0.05_with_ctrl.peaks_peak_684	1	3093885	3094804	+	218	NA	TTS (AT1G09570.4)	TTS (AT1G09570.4)	700	AT1G09560.1	837482	At.11328	NM_100827		GLP5	F14J9.22|F14J9_22|PDGLP1|PLASMODESMAL GERMIN-LIKE PROTEIN 1|germin-like protein 5	germin-like protein 5	protein-coding
merged_clf_H3K9_q_0.05_with_ctrl.peaks_peak_11566	3	22247075	22247729	+	218	NA	exon (AT3G60190.1, exon 2 of 15)	exon (AT3G60190.1, exon 2 of 15)	574	AT3G60190.1	825189	At.20951	NM_115882		DL1E	ADL1E|ADL4|ADLP2|ARABIDOPSIS DYNAMIN-LIKE 4|DRP1E|DYNAMIN-LIKE PROTEIN 2|DYNAMIN-RELATED PROTEIN 1E|DYNAMIN-like 1E|EDR3|ENHANCED DISEASE RESISTANCE 3|F27H5.4	DYNAMIN-like 1E	protein-coding
merged_clf_H3K9_q_0.05_with_ctrl.peaks_peak_8815	3	3069284	3070311	+	218	NA	intron (AT3G09980.1, intron 1 of 3)	intron (AT3G09980.1, intron 1 of 3)	707	AT3G09980.1	820159	At.40010	NM_111833		AT3G09980	ACETYLATED INTERACTING PROTEIN 1|ACIP1	ankyrin repeat 30A-like protein (DUF662)	protein-coding
merged_clf_H3K9_q_0.05_with_ctrl.peaks_peak_5289	2	900294	900909	+	218	NA	promoter-TSS (AT2G03060.5)	promoter-TSS (AT2G03060.5)	345	AT2G03050.1	814834	At.41435	NM_126357		EMB93	EMBRYO DEFECTIVE 93|SINGLET OXYGEN-LINKED DEATH ACTIVATOR 10|SOLDAT10|T17M13.22|T17M13_22	Mitochondrial transcription termination factor family protein	protein-coding
merged_clf_H3K9_q_0.05_with_ctrl.peaks_peak_1369	1	5977460	5979116	+	218	NA	exon (AT1G17420.1, exon 2 of 8)	exon (AT1G17420.1, exon 2 of 8)	965	AT1G17420.1	838314	At.20467	NM_101603		LOX3	ATLOX3|Arabidopsis thaliana lipoxygenase 3|F28G4.10|lipoxygenase 3	lipoxygenase 3	protein-coding
merged_clf_H3K9_q_0.05_with_ctrl.peaks_peak_7221	2	16050091	16051485	+	218	NA	TTS (AT2G08945.1)	TTS (AT2G08945.1)	870	AT2G38310.1	818411	At.12775	NM_129387		PYL4	AtPYL4|PYR1-like 4|RCAR10|T19C21.20|T19C21_20|regulatory components of ABA receptor 10	PYR1-like 4	protein-coding
merged_clf_H3K9_q_0.05_with_ctrl.peaks_peak_13644	4	13215764	13216437	+	218	NA	intron (AT4G26060.1, intron 1 of 5)	intron (AT4G26060.1, intron 1 of 5)	486	AT4G26060.1	828712	At.32212	NM_118739		AT4G26060	F20B18.170|F20B18_170	Ribosomal protein L18ae family	protein-coding
merged_clf_H3K9_q_0.05_with_ctrl.peaks_peak_18301	5	22375466	22376065	+	217	NA	promoter-TSS (AT5G55130.3)	promoter-TSS (AT5G55130.3)	321	AT5G55130.2	835604	At.24643	NM_124895		CNX5	''co-factor for nitrate|MCO15.8|MCO15_8|SIR1|SIRTINOL RESISTANT 1|co-factor for nitrate|reductase and xanthine dehydrogenase 5|reductase and xanthine dehydrogenase 5''	co-factor for nitrate, reductase and xanthine dehydrogenase 5	protein-coding
merged_clf_H3K9_q_0.05_with_ctrl.peaks_peak_16962	5	12558384	12559500	+	217	NA	exon (AT5G33290.1, exon 2 of 4)	exon (AT5G33290.1, exon 2 of 4)	788	AT5G33290.1	833302	At.19950	NM_122853		XGD1	F19N2.10|F19N2_10|xylogalacturonan deficient 1	xylogalacturonan deficient 1	protein-coding
merged_clf_H3K9_q_0.05_with_ctrl.peaks_peak_7530	2	17479473	17480624	+	217	NA	exon (AT2G41890.1, exon 2 of 2)	exon (AT2G41890.1, exon 2 of 2)	1193	AT2G41890.1	818789	At.49579	NM_001336946		AT2G41890	T11A7.1|T11A7_1	curculin-like (mannose-binding) lectin family protein / PAN domain-containing protein	protein-coding
merged_clf_H3K9_q_0.05_with_ctrl.peaks_peak_16520	5	7365707	7366517	+	217	NA	TTS (AT5G22240.1)	TTS (AT5G22240.1)	687	AT5G22250.1	832285	At.27479	NM_122130		CAF1b	AtCAF1b|CCR4- associated factor 1b|T6G21.2	Polynucleotidyl transferase, ribonuclease H-like superfamily protein	protein-coding
merged_clf_H3K9_q_0.05_with_ctrl.peaks_peak_829	1	3744919	3745499	+	217	NA	promoter-TSS (AT1G11180.2)	promoter-TSS (AT1G11180.2)	351	AT1G11175.1	6241237		NR_143555		AT1G11175	-	ncRNA	ncRNA
merged_clf_H3K9_q_0.05_with_ctrl.peaks_peak_14273	4	16052712	16054025	+	217	NA	exon (AT4G33300.1, exon 1 of 5)	exon (AT4G33300.1, exon 1 of 5)	-1215	AT4G08785.1	28720014		NR_142227		AT4G08785	-	ncRNA	ncRNA
merged_clf_H3K9_q_0.05_with_ctrl.peaks_peak_5317	2	1102206	1102732	+	217	NA	promoter-TSS (AT2G03630.2)	promoter-TSS (AT2G03630.2)	342	AT2G03620.1	814891	At.28377	NM_126412		MGT3	AtMGT3|AtMRS2-5|F19B11.7|F19B11_7|MRS2-5|magnesium transporter 3	magnesium transporter 3	protein-coding
merged_clf_H3K9_q_0.05_with_ctrl.peaks_peak_7957	2	19185949	19186562	+	217	NA	promoter-TSS (AT2G09755.1)	promoter-TSS (AT2G09755.1)	492	AT2G46700.2	819282	At.27399	NM_130235		CRK3	ATCRK3|CDPK-related kinase 3|T3A4.8	CDPK-related kinase 3	protein-coding
merged_clf_H3K9_q_0.05_with_ctrl.peaks_peak_5928	2	9080917	9081592	+	217	NA	intron (AT2G21190.1, intron 1 of 5)	intron (AT2G21190.1, intron 1 of 5)	494	AT2G21190.1	816655	At.13705	NM_127690		AT2G21190	F26H11.5|F26H11_5	ER lumen protein retaining receptor family protein	protein-coding
merged_clf_H3K9_q_0.05_with_ctrl.peaks_peak_16235	5	6006058	6006448	+	217	NA	exon (AT5G18170.1, exon 1 of 9)	exon (AT5G18170.1, exon 1 of 9)	218	AT5G18170.1	831935	At.23609	NM_121822		GDH1	GLUTAMATE DECARBOXYLASE 1|GLUTAMATE DEHYDROGENASE 1|MRG7.13|MRG7_13|glutamate dehydrogenase 1	glutamate dehydrogenase 1	protein-coding
merged_clf_H3K9_q_0.05_with_ctrl.peaks_peak_4206	1	26539821	26540748	+	217	NA	exon (AT1G70420.1, exon 1 of 1)	exon (AT1G70420.1, exon 1 of 1)	534	AT1G70420.1	843378	At.10649	NM_105710		AT1G70420	F17O7.4|F17O7_4	DNA ligase-like protein, putative (DUF1645)	protein-coding
merged_clf_H3K9_q_0.05_with_ctrl.peaks_peak_2843	1	18268976	18269460	+	217	NA	exon (AT1G49360.2, exon 1 of 3)	exon (AT1G49360.2, exon 1 of 3)	230	AT1G49360.2	841359	At.19287	NM_103826		AT1G49360	F13F21.21|F13F21_21	F-box family protein	protein-coding
merged_clf_H3K9_q_0.05_with_ctrl.peaks_peak_10717	3	18160145	18161306	+	217	NA	exon (AT3G48990.1, exon 2 of 5)	exon (AT3G48990.1, exon 2 of 5)	761	AT3G48990.1	824060	At.19806	NM_114758		AAE3	ACYL-ACTIVATING ENZYME 3	AMP-dependent synthetase and ligase family protein	protein-coding
merged_clf_H3K9_q_0.05_with_ctrl.peaks_peak_4454	1	27628968	27629966	+	217	NA	exon (AT1G73480.1, exon 1 of 7)	exon (AT1G73480.1, exon 1 of 7)	789	AT1G73480.1	843683	At.23620	NM_106007		AT1G73480	T9L24.33|T9L24_33	alpha/beta-Hydrolases superfamily protein	protein-coding
merged_clf_H3K9_q_0.05_with_ctrl.peaks_peak_2760	1	17687295	17688517	+	217	NA	intron (AT1G47970.1, intron 1 of 1)	intron (AT1G47970.1, intron 1 of 1)	916	AT1G47970.1	841215	At.17710	NM_103693		AT1G47970	T2J15.12|T2J15_12	nucleolin	protein-coding
merged_clf_H3K9_q_0.05_with_ctrl.peaks_peak_1237	1	5409249	5409943	+	217	NA	TTS (AT1G05193.1)	TTS (AT1G05193.1)	447	AT1G15730.1	838142	At.16909	NM_101441		AT1G15730	F7H2.7|F7H2_7	Cobalamin biosynthesis CobW-like protein	protein-coding
merged_clf_H3K9_q_0.05_with_ctrl.peaks_peak_5761	2	8125572	8126655	+	217	NA	exon (AT2G18750.3, exon 3 of 9)	exon (AT2G18750.3, exon 3 of 9)	985	AT2G18750.2	816390	At.20176	NM_127431		AT2G18750	MSF3.13|MSF3_13	Calmodulin-binding protein	protein-coding
merged_clf_H3K9_q_0.05_with_ctrl.peaks_peak_9917	3	8404878	8405153	+	217	NA	exon (AT3G23440.1, exon 1 of 1)	exon (AT3G23440.1, exon 1 of 1)	274	AT3G23440.1	28719309	At.65136	NM_001338636		EDA6	EMBRYO SAC DEVELOPMENT ARREST 6|MATERNAL EFFECT EMBRYO ARREST 37|MEE37	embryo sac development arrest 6	protein-coding
merged_clf_H3K9_q_0.05_with_ctrl.peaks_peak_1066	1	4776469	4777573	+	217	NA	promoter-TSS (AT1G13960.2)	promoter-TSS (AT1G13960.2)	-25	AT1G13960.2	837956	At.20024	NM_101262		WRKY4	F16A14.18|WRKY DNA-binding protein 4	WRKY DNA-binding protein 4	protein-coding
merged_clf_H3K9_q_0.05_with_ctrl.peaks_peak_17397	5	17182009	17182587	+	217	NA	TTS (AT5G42840.1)	TTS (AT5G42840.1)	324	AT5G42850.2	834296	At.20056	NM_123650		AT5G42850	MBD2.4|MBD2_4	Thioredoxin superfamily protein	protein-coding
merged_clf_H3K9_q_0.05_with_ctrl.peaks_peak_5246	2	560907	561843	+	217	NA	intron (AT2G02180.1, intron 2 of 10)	intron (AT2G02180.1, intron 2 of 10)	680	AT2G02180.1	814749	At.23323	NM_126278		TOM3	F5O4.5|F5O4_5|tobamovirus multiplication protein 3	tobamovirus multiplication protein 3	protein-coding
merged_clf_H3K9_q_0.05_with_ctrl.peaks_peak_13282	4	11471364	11472853	+	217	NA	exon (AT4G21570.1, exon 2 of 5)	exon (AT4G21570.1, exon 2 of 5)	913	AT4G21570.2	828242	At.43310	NM_118277		AT4G21570	F17L22.30	organic solute transporter ostalpha protein (DUF300)	protein-coding
merged_clf_H3K9_q_0.05_with_ctrl.peaks_peak_12347	4	5775315	5776459	+	217	NA	TTS (AT4G05685.1)	TTS (AT4G05685.1)	677	AT4G09000.2	826479	At.22637	NM_116969		GRF1	GENERAL REGULATORY FACTOR1-G-BOX FACTOR 14-3-3 HOMOLOG ISOFORM CHI|GF14 CHI|general regulatory factor 1	general regulatory factor 1	protein-coding
merged_clf_H3K9_q_0.05_with_ctrl.peaks_peak_18584	5	23660352	23661238	+	217	NA	exon (AT5G58530.1, exon 1 of 1)	exon (AT5G58530.1, exon 1 of 1)	712	AT5G58530.1	835966	At.29274	NM_125239		AT5G58530	MQJ2.15|MQJ2_15	Glutaredoxin family protein	protein-coding
merged_clf_H3K9_q_0.05_with_ctrl.peaks_peak_8419	3	1447776	1448293	+	216	NA	promoter-TSS (AT3G05155.2)	promoter-TSS (AT3G05155.2)	-162	AT3G05155.1	819678	At.45136	NM_148688		AT3G05155	-	Major facilitator superfamily protein	protein-coding
merged_clf_H3K9_q_0.05_with_ctrl.peaks_peak_17643	5	18689756	18690678	+	216	NA	exon (AT5G46080.1, exon 1 of 1)	exon (AT5G46080.1, exon 1 of 1)	640	AT5G46080.1	834649	At.29976	NM_123976		AT5G46080	MCL19.13|MCL19_13	Protein kinase superfamily protein	protein-coding
merged_clf_H3K9_q_0.05_with_ctrl.peaks_peak_10085	3	9528746	9529538	+	216	NA	TTS (AT3G26070.1)	TTS (AT3G26070.1)	368	AT3G26080.1	822205	At.70372	NM_113512		AT3G26080	-	plastid-lipid associated protein PAP / fibrillin family protein	protein-coding
merged_clf_H3K9_q_0.05_with_ctrl.peaks_peak_888	1	4028768	4029590	+	216	NA	exon (AT1G11930.2, exon 2 of 7)	exon (AT1G11930.2, exon 2 of 7)	487	AT1G11930.1	837744	At.21268	NM_101065		AT1G11930	F12F1.20|F12F1_20	Putative pyridoxal phosphate-dependent enzyme, YBL036C type	protein-coding
merged_clf_H3K9_q_0.05_with_ctrl.peaks_peak_9577	3	6479724	6480471	+	216	NA	TTS (AT3G18790.1)	TTS (AT3G18790.1)	510	AT3G18800.1	821413	At.38492	NM_112766		AT3G18800	-	transmembrane protein	protein-coding
merged_clf_H3K9_q_0.05_with_ctrl.peaks_peak_1894	1	8432212	8433283	+	216	NA	exon (AT1G23870.1, exon 2 of 4)	exon (AT1G23870.1, exon 2 of 4)	568	AT1G23870.1	838998	At.41515	NM_102235		TPS9	ATTPS9|T23E23.3|T23E23_3|TREHALOSE -6-PHOSPHATASE SYNTHASE S9|trehalose-phosphatase/synthase 9	trehalose-phosphatase/synthase 9	protein-coding
merged_clf_H3K9_q_0.05_with_ctrl.peaks_peak_9205	3	4737532	4739063	+	216	NA	exon (AT3G14230.2, exon 2 of 3)	exon (AT3G14230.2, exon 2 of 3)	839	AT3G14230.1	820643	At.25146	NM_112281		RAP2.2	related to AP2 2	related to AP2 2	protein-coding
merged_clf_H3K9_q_0.05_with_ctrl.peaks_peak_2810	1	18030802	18031381	+	216	NA	TTS (AT1G07503.1)	TTS (AT1G07503.1)	387	AT1G48745.1	5007786	At.64865	NM_001084220		AT1G48745	-	hypothetical protein	protein-coding
merged_clf_H3K9_q_0.05_with_ctrl.peaks_peak_15435	5	2271996	2272405	+	216	NA	promoter-TSS (AT5G01375.1)	promoter-TSS (AT5G01375.1)	37	AT5G01375.1	28720377		NR_142500		AT5G01375	-	ncRNA	ncRNA
merged_clf_H3K9_q_0.05_with_ctrl.peaks_peak_12960	4	9671039	9672126	+	216	NA	exon (AT4G17250.3, exon 2 of 2)	exon (AT4G17250.3, exon 2 of 2)	701	AT4G17250.2	827439	At.19726	NM_117831		AT4G17250	DL4660W|FCAALL.204	transmembrane protein	protein-coding
merged_clf_H3K9_q_0.05_with_ctrl.peaks_peak_17617	5	18505857	18506310	+	216	NA	exon (AT5G45630.1, exon 1 of 1)	exon (AT5G45630.1, exon 1 of 1)	299	AT5G45630.1	834603	At.30002	NM_123931		AT5G45630	MRA19.3|MRA19_3	senescence regulator (Protein of unknown function, DUF584)	protein-coding
merged_clf_H3K9_q_0.05_with_ctrl.peaks_peak_17414	5	17271319	17272131	+	216	NA	exon (AT5G43060.1, exon 1 of 5)	exon (AT5G43060.1, exon 1 of 5)	573	AT5G43060.1	834321	At.24130	NM_123672		RD21B	MMG4.7|MMG4_7|esponsive to dehydration 21B	Granulin repeat cysteine protease family protein	protein-coding
merged_clf_H3K9_q_0.05_with_ctrl.peaks_peak_19240	5	26364442	26365951	+	216	NA	exon (AT5G65920.1, exon 1 of 1)	exon (AT5G65920.1, exon 1 of 1)	806	AT5G65920.2	836721	At.74058	NM_125989		AT5G65920	K14B20.9|K14B20_9	ARM repeat superfamily protein	protein-coding
merged_clf_H3K9_q_0.05_with_ctrl.peaks_peak_4982	1	29860725	29861576	+	216	NA	TTS (AT1G79370.1)	TTS (AT1G79370.1)	659	AT1G79380.1	844276	At.48394	NM_106586		RGLG4	RING DOMAIN LIGASE 4|T8K14.20|T8K14_20	Ca(2)-dependent phospholipid-binding protein (Copine) family	protein-coding
merged_clf_H3K9_q_0.05_with_ctrl.peaks_peak_4026	1	25669089	25670010	+	216	NA	exon (AT1G68460.1, exon 1 of 1)	exon (AT1G68460.1, exon 1 of 1)	796	AT1G68460.1	843175	At.10552	NM_105517		IPT1	ATIPT1|ATP/ADP ISOPENTENYLTRANSFERASE|Arabidopsis thaliana isopentenyltransferase 1|T26J14.3|T26J14_3|isopentenyltransferase 1	isopentenyltransferase 1	protein-coding
merged_clf_H3K9_q_0.05_with_ctrl.peaks_peak_18381	5	22776653	22777228	+	216	NA	exon (AT5G56260.4, exon 1 of 2)	exon (AT5G56260.4, exon 1 of 2)	384	AT5G56260.3	835725	At.29397	NM_125009		AT5G56260	K24C1.7|K24C1_7	Ribonuclease E inhibitor RraA/Dimethylmenaquinone methyltransferase	protein-coding
merged_clf_H3K9_q_0.05_with_ctrl.peaks_peak_8468	3	1614215	1614956	+	216	NA	TTS (AT3G05550.1)	TTS (AT3G05550.1)	370	AT3G05560.3	819722	At.28518	NM_111429		AT3G05560	F18C1.17|F18C1_17	Ribosomal L22e protein family	protein-coding
merged_clf_H3K9_q_0.05_with_ctrl.peaks_peak_843	1	3802737	3804060	+	216	NA	intron (AT1G11310.2, intron 2 of 12)	intron (AT1G11310.2, intron 2 of 12)	297	AT1G11310.3	837673	At.24513	NM_101004		MLO2	ATMLO2|MILDEW RESISTANCE LOCUS O 2|PMR2|POWDERY MILDEW RESISTANT 2|T28P6.4|T28P6_4	Seven transmembrane MLO family protein	protein-coding
merged_clf_H3K9_q_0.05_with_ctrl.peaks_peak_4235	1	26674626	26675898	+	216	NA	intron (AT1G70740.2, intron 2 of 5)	intron (AT1G70740.2, intron 2 of 5)	728	AT1G70740.2	843411	At.35272	NM_105742		AT1G70740	F5A18.8|F5A18_8	Protein kinase superfamily protein	protein-coding
merged_clf_H3K9_q_0.05_with_ctrl.peaks_peak_17493	5	17731154	17731611	+	216	NA	promoter-TSS (AT5G44063.1)	promoter-TSS (AT5G44063.1)	377	AT5G44060.1	834429	At.27507	NM_123773		AT5G44060	MRH10.17|MRH10_17	embryo sac development arrest protein	protein-coding
merged_clf_H3K9_q_0.05_with_ctrl.peaks_peak_3115	1	20017028	20017775	+	216	NA	TTS (AT1G53633.1)	TTS (AT1G53633.1)	531	AT1G53633.1	7922339	At.68968	NM_001160949		AT1G53633	-	hypothetical protein	protein-coding
merged_clf_H3K9_q_0.05_with_ctrl.peaks_peak_4422	1	27484411	27485328	+	216	NA	TTS (AT1G73066.1)	TTS (AT1G73066.1)	629	AT1G73080.1	843639	At.20127	NM_105966		PEPR1	ATPEPR1|F3N23.28|F3N23_28|PEP1 RECEPTOR 1|PEP1 receptor 1	PEP1 receptor 1	protein-coding
merged_clf_H3K9_q_0.05_with_ctrl.peaks_peak_8038	2	19555082	19556014	+	216	NA	promoter-TSS (AT2G47730.1)	promoter-TSS (AT2G47730.1)	578	AT2G47710.1	819384	At.20504	NM_130339		AT2G47710	F17A22.10	Adenine nucleotide alpha hydrolases-like superfamily protein	protein-coding
merged_clf_H3K9_q_0.05_with_ctrl.peaks_peak_18017	5	20877916	20878427	+	216	NA	TTS (AT5G51380.1)	TTS (AT5G51380.1)	293	AT5G51390.1	835213	At.7949	NM_124518		AT5G51390	-	hypothetical protein	protein-coding
merged_clf_H3K9_q_0.05_with_ctrl.peaks_peak_8261	3	723925	724627	+	216	NA	promoter-TSS (AT3G03130.1)	promoter-TSS (AT3G03130.1)	398	AT3G03140.1	821075	At.41023	NM_111184		AT3G03140	T17B22.17|T17B22_17	Tudor/PWWP/MBT superfamily protein	protein-coding
merged_clf_H3K9_q_0.05_with_ctrl.peaks_peak_2060	1	9425583	9426429	+	216	NA	intron (AT1G27130.1, intron 1 of 1)	intron (AT1G27130.1, intron 1 of 1)	726	AT1G27130.1	839602	At.16269	NM_102475		GSTU13	ATGSTU13|GLUTATHIONE S-TRANSFERASE 12|GST12|T7N9.190|T7N9_190|glutathione S-transferase tau 13	glutathione S-transferase tau 13	protein-coding
merged_clf_H3K9_q_0.05_with_ctrl.peaks_peak_12871	4	9270987	9271646	+	216	NA	TTS (AT4G16442.1)	TTS (AT4G16442.1)	353	AT4G16440.1	827338	At.4413	NM_117739		NAR1	DL4245C|FCAALL.367|GOLLUM|Growth at different Oxygen Levels Influences Morphogenesis|homolog of yeast NAR1	ferredoxin hydrogenase	protein-coding
merged_clf_H3K9_q_0.05_with_ctrl.peaks_peak_15993	5	4823775	4825291	+	216	NA	promoter-TSS (AT5G14900.1)	promoter-TSS (AT5G14900.1)	819	AT5G14910.2	831343	At.9884	NM_121495		AT5G14910	F2G14.30|F2G14_30	Heavy metal transport/detoxification superfamily protein	protein-coding
merged_clf_H3K9_q_0.05_with_ctrl.peaks_peak_11324	3	21034968	21036004	+	216	NA	intron (AT3G56800.1, intron 1 of 1)	intron (AT3G56800.1, intron 1 of 1)	680	AT3G56800.1	824847	At.23067	NM_115539		CAM3	ACAM-3|CALMODULIN 3|T8M16.130|acam-3|calmodulin 3	calmodulin 3	protein-coding
merged_clf_H3K9_q_0.05_with_ctrl.peaks_peak_8067	2	19649145	19649991	+	216	NA	exon (AT2G48030.2, exon 1 of 3)	exon (AT2G48030.2, exon 1 of 3)	719	AT2G48030.1	819415	At.27774	NM_130370		AT2G48030	T9J23.18	DNAse I-like superfamily protein	protein-coding
merged_clf_H3K9_q_0.05_with_ctrl.peaks_peak_4094	1	26082965	26083538	+	216	NA	exon (AT1G69380.1, exon 1 of 7)	exon (AT1G69380.1, exon 1 of 7)	355	AT1G69380.1	843270	At.24346	NM_105605		RRG	F23O10.4|F23O10_4|RETARDED ROOT GROWTH	sporulation protein (DUF155)	protein-coding
merged_clf_H3K9_q_0.05_with_ctrl.peaks_peak_12364	4	5962953	5963864	+	216	NA	exon (AT4G09420.1, exon 1 of 2)	exon (AT4G09420.1, exon 1 of 2)	646	AT4G09420.1	826524	At.33696	NM_117010		AT4G09420	T15G18.160|T15G18_160	Disease resistance protein (TIR-NBS class)	protein-coding
merged_clf_H3K9_q_0.05_with_ctrl.peaks_peak_5587	2	6984634	6985400	+	216	NA	exon (AT2G16070.3, exon 1 of 2)	exon (AT2G16070.3, exon 1 of 2)	445	AT2G16070.1	816104	At.14413	NM_127166		PDV2	F7H1.9|F7H1_9|PLASTID DIVISION2	plastid division2	protein-coding
merged_clf_H3K9_q_0.05_with_ctrl.peaks_peak_19060	5	25718227	25719765	+	216	NA	exon (AT5G64300.1, exon 2 of 7)	exon (AT5G64300.1, exon 2 of 7)	988	AT5G64300.1	836551	At.49217	NM_125826		GCH	ARABIDOPSIS THALIANA GTP CYCLOHYDROLASE II|ATGCH|ATRIBA1|Arabidopsis thaliana riboflavin A1|GTP CYCLOHYDROLASE II|GTP cyclohydrolase II|RED FLUORESCENT IN DARKNESS 1|RFD1|RIBA1|riboflavin A1	GTP cyclohydrolase II	protein-coding
merged_clf_H3K9_q_0.05_with_ctrl.peaks_peak_15701	5	3472344	3473435	+	215	NA	promoter-TSS (AT5G10965.3)	promoter-TSS (AT5G10965.3)	681	AT5G10980.1	830965	At.6019	NM_121136		AT5G10980	H3.3|T30N20.250|T30N20_250|histone 3.3	Histone superfamily protein	protein-coding
merged_clf_H3K9_q_0.05_with_ctrl.peaks_peak_1632	1	7176850	7178401	+	215	NA	promoter-TSS (AT1G20691.1)	promoter-TSS (AT1G20691.1)	850	AT1G20693.2	838658	At.21298	NM_101920		HMGB2	HIGH MOBILITY GROUP BETA 1|HMG BETA 1|NFD02|NFD2|NUCLEOSOME/CHROMATIN ASSEMBLY FACTOR GROUP D 02|NUCLEOSOME/CHROMATIN ASSEMBLY FACTOR GROUP D 2|high mobility group B2	high mobility group B2	protein-coding
merged_clf_H3K9_q_0.05_with_ctrl.peaks_peak_18382	5	22779728	22780514	+	215	NA	exon (AT5G56270.1, exon 1 of 5)	exon (AT5G56270.1, exon 1 of 5)	507	AT5G56270.1	835726	At.21527	NM_125010		WRKY2	ARABIDOPSIS THALIANA WRKY DNA-BINDING PROTEIN 2|ATWRKY2|MXK23.1|MXK23_1|WRKY DNA-binding protein 2	WRKY DNA-binding protein 2	protein-coding
merged_clf_H3K9_q_0.05_with_ctrl.peaks_peak_1145	1	5066805	5068525	+	215	NA	intron (AT1G14720.1, intron 3 of 3)	intron (AT1G14720.1, intron 3 of 3)	1012	AT1G14720.1	838037	At.279	NM_101341		XTH28	ATXTH28|ENDOXYLOGLUCAN TRANSFERASE A2|EXGT-A2|F10B6.12|F10B6_12|XTR2|XYLOGLUCAN ENDOTRANSGLYCOSYLASE-RELATED PROTEIN|xyloglucan endotransglucosylase/hydrolase 28|xyloglucan endotransglycosylase related 2	xyloglucan endotransglucosylase/hydrolase 28	protein-coding
merged_clf_H3K9_q_0.05_with_ctrl.peaks_peak_3825	1	24435785	24436259	+	215	NA	TTS (AT1G65710.1)	TTS (AT1G65710.1)	233	AT1G65700.2	842881	At.28329	NM_105244		LSM8	AtLSM8|F1E22.8|F1E22_8|SM-like 8	Small nuclear ribonucleoprotein family protein	protein-coding
merged_clf_H3K9_q_0.05_with_ctrl.peaks_peak_14801	4	18147233	18148043	+	215	NA	promoter-TSS (AT4G38910.1)	promoter-TSS (AT4G38910.1)	427	AT4G38920.2	830047	At.20761	NM_120052		VHA-C3	ATVHA-C3|AVA-P3|F19H22.20|vacuolar-type H(+)-ATPase C3	vacuolar-type H[+]-ATPase C3	protein-coding
merged_clf_H3K9_q_0.05_with_ctrl.peaks_peak_246	1	982472	983424	+	215	NA	promoter-TSS (AT1G03860.1)	promoter-TSS (AT1G03860.1)	596	AT1G03870.1	839384	At.23966	NM_100267		FLA9	F21M11.20|F21M11_20|FASCICLIN-like arabinoogalactan 9	FASCICLIN-like arabinoogalactan 9	protein-coding
merged_clf_H3K9_q_0.05_with_ctrl.peaks_peak_16756	5	8746752	8747181	+	215	NA	exon (AT5G25240.1, exon 1 of 1)	exon (AT5G25240.1, exon 1 of 1)	324	AT5G25240.1	832595	At.30923	NM_122433		AT5G25240	F21J6.107|F21J6_107	stress induced protein	protein-coding
merged_clf_H3K9_q_0.05_with_ctrl.peaks_peak_14427	4	16657118	16659217	+	215	NA	exon (AT4G34980.1, exon 1 of 1)	exon (AT4G34980.1, exon 1 of 1)	1319	AT4G34980.1	829650	At.27496	NM_119664		SLP2	M4E13.40|M4E13_40|subtilisin-like serine protease 2	subtilisin-like serine protease 2	protein-coding
merged_clf_H3K9_q_0.05_with_ctrl.peaks_peak_5592	2	7053719	7054400	+	215	NA	TTS (AT2G06605.1)	TTS (AT2G06605.1)	279	AT2G06605.1	28717730		NR_140157		AT2G06605	-	ncRNA	ncRNA
merged_clf_H3K9_q_0.05_with_ctrl.peaks_peak_10418	3	16056297	16056965	+	215	NA	TTS (AT3G06815.1)	TTS (AT3G06815.1)	656	AT3G06815.1	28718954		NR_141284		AT3G06815	-	ncRNA	ncRNA
merged_clf_H3K9_q_0.05_with_ctrl.peaks_peak_19276	5	26458049	26459499	+	215	NA	exon (AT5G66210.4, exon 2 of 11)	exon (AT5G66210.4, exon 2 of 11)	850	AT5G66210.4	836753	At.27527	NM_126019		CPK28	K2A18.29|K2A18_29|calcium-dependent protein kinase 28	calcium-dependent protein kinase 28	protein-coding
merged_clf_H3K9_q_0.05_with_ctrl.peaks_peak_6189	2	10566926	10568099	+	215	NA	exon (AT2G24790.2, exon 1 of 1)	exon (AT2G24790.2, exon 1 of 1)	614	AT2G24790.2	817016	At.24362	NM_128038		COL3	ATCOL3|B-box domain protein 4|BBX4|CONSTANS-like 3|F27A10.10	CONSTANS-like 3	protein-coding
merged_clf_H3K9_q_0.05_with_ctrl.peaks_peak_18159	5	21634610	21635346	+	215	NA	promoter-TSS (AT5G53300.2)	promoter-TSS (AT5G53300.2)	397	AT5G53310.2	835412	At.43086	NM_124710		AT5G53310	K19E1.11|K19E1_11	myosin heavy chain-like protein	protein-coding
merged_clf_H3K9_q_0.05_with_ctrl.peaks_peak_1833	1	8098639	8099871	+	215	NA	exon (AT1G22882.1, exon 2 of 3)	exon (AT1G22882.1, exon 2 of 3)	863	AT1G22882.1	838894	At.45268	NM_148482		AT1G22882	AtSUN3|SUN-domain protein 3|SUN3	Galactose-binding protein	protein-coding
merged_clf_H3K9_q_0.05_with_ctrl.peaks_peak_880	1	3992586	3993509	+	215	NA	intron (AT1G11820.3, intron 1 of 1)	intron (AT1G11820.3, intron 1 of 1)	478	AT1G11820.1	837730	At.10643	NM_101054		AT1G11820	-	O-Glycosyl hydrolases family 17 protein	protein-coding
merged_clf_H3K9_q_0.05_with_ctrl.peaks_peak_8062	2	19641478	19643273	+	215	NA	exon (AT2G48010.1, exon 1 of 1)	exon (AT2G48010.1, exon 1 of 1)	1024	AT2G48010.1	819413	At.221	NM_130368		RKF3	T9J23.16|receptor-like kinase in in flowers 3	receptor-like kinase in in flowers 3	protein-coding
merged_clf_H3K9_q_0.05_with_ctrl.peaks_peak_5046	1	30156649	30157596	+	215	NA	exon (AT1G80180.1, exon 1 of 1)	exon (AT1G80180.1, exon 1 of 1)	686	AT1G80180.1	844358	At.11611	NM_106667		AT1G80180	F18B13.26|F18B13_26	hypothetical protein	protein-coding
merged_clf_H3K9_q_0.05_with_ctrl.peaks_peak_13833	4	13997749	13998307	+	215	NA	promoter-TSS (AT4G28230.1)	promoter-TSS (AT4G28230.1)	576	AT4G28240.1	828939	At.4519	NM_118964		AT4G28240	F26K10.120|F26K10_120	Wound-responsive family protein	protein-coding
merged_clf_H3K9_q_0.05_with_ctrl.peaks_peak_14160	4	15501161	15501912	+	215	NA	TTS (AT4G32050.1)	TTS (AT4G32050.1)	458	AT4G32060.2	829337	At.24296	NM_119358		AT4G32060	F10N7.140|F10N7_140	calcium-binding EF hand family protein	protein-coding
merged_clf_H3K9_q_0.05_with_ctrl.peaks_peak_9922	3	8449847	8450675	+	215	NA	intron (AT3G23550.1, intron 1 of 6)	intron (AT3G23550.1, intron 1 of 6)	538	AT3G23550.1	821934	At.28427	NM_113258		AT3G23550	-	MATE efflux family protein	protein-coding
merged_clf_H3K9_q_0.05_with_ctrl.peaks_peak_4972	1	29807970	29809445	+	215	NA	Intergenic	Intergenic	3572	AT1G79250.3	844265	At.50049	NM_106575		AGC1.7	AGC kinase 1.7|YUP8H12R.15|YUP8H12R_15	AGC kinase 1.7	protein-coding
merged_clf_H3K9_q_0.05_with_ctrl.peaks_peak_18932	5	25248819	25249839	+	215	NA	promoter-TSS (AT5G62910.1)	promoter-TSS (AT5G62910.1)	639	AT5G62900.1	836410	At.8486	NM_125684		AT5G62900	MQB2.22|MQB2_22	basic-leucine zipper transcription factor K	protein-coding
merged_clf_H3K9_q_0.05_with_ctrl.peaks_peak_3896	1	24902107	24903434	+	215	NA	exon (AT1G66760.4, exon 2 of 6)	exon (AT1G66760.4, exon 2 of 6)	792	AT1G66760.3	842994	At.26433	NM_105347		AT1G66760	F4N21.11|F4N21_11	MATE efflux family protein	protein-coding
merged_clf_H3K9_q_0.05_with_ctrl.peaks_peak_18229	5	22054260	22054513	+	215	NA	promoter-TSS (AT5G08175.1)	promoter-TSS (AT5G08175.1)	-486	AT5G08175.1	28720954		NR_143062		AT5G08175	-	ncRNA	ncRNA
merged_clf_H3K9_q_0.05_with_ctrl.peaks_peak_8344	3	1106546	1108035	+	215	NA	intron (AT3G04210.2, intron 1 of 1)	intron (AT3G04210.2, intron 1 of 1)	779	AT3G04210.1	819576	At.18791	NM_111292		AT3G04210	T6K12.17|T6K12_17	Disease resistance protein (TIR-NBS class)	protein-coding
merged_clf_H3K9_q_0.05_with_ctrl.peaks_peak_7917	2	19042485	19043074	+	215	NA	TTS (AT2G46380.1)	TTS (AT2G46380.1)	455	AT2G46390.1	819247	At.20468	NM_130203		SDH8	F11C10.8|succinate dehydrogenase 8	succinate dehydrogenase subunit	protein-coding
merged_clf_H3K9_q_0.05_with_ctrl.peaks_peak_5154	2	107138	108680	+	215	NA	exon (AT2G01180.1, exon 2 of 3)	exon (AT2G01180.1, exon 2 of 3)	322	AT2G01180.6	814646	At.10548	NM_126179		PAP1	ATLPP1|ATPAP1|F10A8.6|F10A8_6|LIPID PHOSPHATE PHOSPHATASE 1|LPP1|phosphatidic acid phosphatase 1	phosphatidic acid phosphatase 1	protein-coding
merged_clf_H3K9_q_0.05_with_ctrl.peaks_peak_6650	2	13177614	13178316	+	215	NA	promoter-TSS (AT2G30970.2)	promoter-TSS (AT2G30970.2)	23	AT2G08425.1	28717954		NR_140339		AT2G08425	-	ncRNA	ncRNA
merged_clf_H3K9_q_0.05_with_ctrl.peaks_peak_3131	1	20101468	20102878	+	215	NA	exon (AT1G53840.1, exon 1 of 2)	exon (AT1G53840.1, exon 1 of 2)	874	AT1G53840.1	841821	At.24997	NM_104261		PME1	ATPME1|T18A20.7|T18A20_7|pectin methylesterase 1	pectin methylesterase 1	protein-coding
merged_clf_H3K9_q_0.05_with_ctrl.peaks_peak_19188	5	26176044	26177404	+	215	NA	promoter-TSS (AT5G09385.1)	promoter-TSS (AT5G09385.1)	-344	AT5G09385.1	28721095		NR_143205		AT5G09385	-	ncRNA	ncRNA
merged_clf_H3K9_q_0.05_with_ctrl.peaks_peak_12639	4	7938050	7938562	+	215	NA	TTS (AT4G13650.1)	TTS (AT4G13650.1)	339	AT4G13640.2	826998	At.22199	NM_117438		UNE16	F18A5.30|F18A5_30|unfertilized embryo sac 16	Homeodomain-like superfamily protein	protein-coding
merged_clf_H3K9_q_0.05_with_ctrl.peaks_peak_8049	2	19608189	19609204	+	215	NA	exon (AT2G47890.3, exon 1 of 3)	exon (AT2G47890.3, exon 1 of 3)	700	AT2G47890.3	819401	At.12948	NM_130356		AT2G47890	F17A22.28	B-box type zinc finger protein with CCT domain-containing protein	protein-coding
merged_clf_H3K9_q_0.05_with_ctrl.peaks_peak_8336	3	1073405	1074090	+	215	NA	exon (AT3G04090.1, exon 1 of 3)	exon (AT3G04090.1, exon 1 of 3)	497	AT3G04090.1	819564	At.40902	NM_111280		SIP1A	SIP1;1|T6K12.29|T6K12_29|small and basic intrinsic protein 1A	small and basic intrinsic protein 1A	protein-coding
merged_clf_H3K9_q_0.05_with_ctrl.peaks_peak_8874	3	3356701	3357588	+	215	NA	promoter-TSS (AT3G10720.1)	promoter-TSS (AT3G10720.1)	-333	AT3G10720.1	820241	At.19163	NM_111908		AT3G10720	-	Plant invertase/pectin methylesterase inhibitor superfamily	protein-coding
merged_clf_H3K9_q_0.05_with_ctrl.peaks_peak_13761	4	13754137	13754687	+	215	NA	exon (AT4G27540.1, exon 1 of 4)	exon (AT4G27540.1, exon 1 of 4)	400	AT4G27540.2	828863	At.32093	NM_118889		PRA1.H	T29A15.30|T29A15_30|prenylated RAB acceptor 1.H	prenylated RAB acceptor 1.H	protein-coding
merged_clf_H3K9_q_0.05_with_ctrl.peaks_peak_16573	5	7677056	7678278	+	215	NA	exon (AT5G22940.2, exon 1 of 3)	exon (AT5G22940.2, exon 1 of 3)	729	AT5G22940.2	832358	At.44147	NM_122200		F8H	FRA8 homolog|MRN17.17|MRN17_17	glucuronoxylan glucuronosyltransferase, putative	protein-coding
merged_clf_H3K9_q_0.05_with_ctrl.peaks_peak_7404	2	16869427	16870217	+	215	NA	TTS (AT2G40390.1)	TTS (AT2G40390.1)	488	AT2G40400.3	818633	At.14284	NM_129600		AT2G40400	BPG3|Brz-insensitive-pale green 3|T3G21.17|T3G21_17	DUF399 family protein, putative (DUF399 and DUF3411)	protein-coding
merged_clf_H3K9_q_0.05_with_ctrl.peaks_peak_13672	4	13345898	13346511	+	215	NA	promoter-TSS (AT4G26410.1)	promoter-TSS (AT4G26410.1)	393	AT4G26400.1	828746	At.45862	NM_118773		AT4G26400	M3E9.170|M3E9_170	RING/U-box superfamily protein	protein-coding
merged_clf_H3K9_q_0.05_with_ctrl.peaks_peak_15501	5	2609451	2610101	+	215	NA	exon (AT5G08130.7, exon 2 of 12)	exon (AT5G08130.7, exon 2 of 12)	347	AT5G08130.3	830708	At.20960	NM_001125718		BIM1	T22D6.70|T22D6_70	basic helix-loop-helix (bHLH) DNA-binding superfamily protein	protein-coding
merged_clf_H3K9_q_0.05_with_ctrl.peaks_peak_2617	1	13900059	13900759	+	214	NA	intron (AT1G36730.1, intron 1 of 1)	intron (AT1G36730.1, intron 1 of 1)	422	AT1G36730.1	840582	At.3809	NM_103340		AT1G36730	T15P17.7|T15P17_7	Translation initiation factor IF2/IF5	protein-coding
merged_clf_H3K9_q_0.05_with_ctrl.peaks_peak_11802	3	23266249	23266679	+	214	NA	exon (AT3G62950.1, exon 1 of 1)	exon (AT3G62950.1, exon 1 of 1)	237	AT3G62950.1	825470	At.34020	NM_116160		AT3G62950	-	Thioredoxin superfamily protein	protein-coding
merged_clf_H3K9_q_0.05_with_ctrl.peaks_peak_3695	1	23689800	23690564	+	214	NA	exon (AT1G63840.1, exon 1 of 1)	exon (AT1G63840.1, exon 1 of 1)	625	AT1G63840.1	842687	At.21224	NM_105059		AT1G63840	T12P18.14|T12P18_14	RING/U-box superfamily protein	protein-coding
merged_clf_H3K9_q_0.05_with_ctrl.peaks_peak_8058	2	19629516	19630576	+	214	NA	TTS (AT2G47960.1)	TTS (AT2G47960.1)	572	AT2G47970.2	819409	At.21030	NM_130364		AT2G47970	T9J23.1	Nuclear pore localization protein NPL4	protein-coding
merged_clf_H3K9_q_0.05_with_ctrl.peaks_peak_8020	2	19484197	19484676	+	214	NA	promoter-TSS (AT2G09905.1)	promoter-TSS (AT2G09905.1)	91	AT2G09905.1	28718226		NR_140614		AT2G09905	-	ncRNA	ncRNA
merged_clf_H3K9_q_0.05_with_ctrl.peaks_peak_18969	5	25386320	25387202	+	214	NA	TTS (AT5G63380.1)	TTS (AT5G63380.1)	487	AT5G63370.3	836456	At.8970	NM_125732		AT5G63370	CDKG1|K9H21.10|K9H21_10|cyclin-dependent kinase G1	Protein kinase superfamily protein	protein-coding
merged_clf_H3K9_q_0.05_with_ctrl.peaks_peak_3094	1	19918062	19918842	+	214	NA	intron (AT1G53390.1, intron 1 of 13)	intron (AT1G53390.1, intron 1 of 13)	458	AT1G53390.1	841775	At.37411	NM_104218		ABCG24	ATP-binding cassette G24|F12M16.28|F12M16_28	P-loop containing nucleoside triphosphate hydrolases superfamily protein	protein-coding
merged_clf_H3K9_q_0.05_with_ctrl.peaks_peak_1084	1	4855526	4856206	+	214	NA	promoter-TSS (AT1G14200.1)	promoter-TSS (AT1G14200.1)	333	AT1G14205.1	837981	At.22450	NM_148464		AT1G14205	-	Ribosomal L18p/L5e family protein	protein-coding
merged_clf_H3K9_q_0.05_with_ctrl.peaks_peak_17626	5	18559184	18560094	+	214	NA	TTS (ENSRNA049492640-T1)	TTS (ENSRNA049492640-T1)	579	AT5G45750.1	834614	At.7538	NM_123942		RABA1c	AtRABA1c|MRA19.18|MRA19_18|RAB GTPase homolog A1C	RAB GTPase homolog A1C	protein-coding
merged_clf_H3K9_q_0.05_with_ctrl.peaks_peak_157	1	635285	636474	+	214	NA	TTS (AT1G04147.1)	TTS (AT1G04147.1)	735	AT1G02860.2	839559	At.22880	NM_100167		NLA	BAH1|BENZOIC ACID HYPERSENSITIVE 1|F22D16.14|F22D16_14|nitrogen limitation adaptation	SPX (SYG1/Pho81/XPR1) domain-containing protein	protein-coding
merged_clf_H3K9_q_0.05_with_ctrl.peaks_peak_15108	5	769508	770271	+	214	NA	promoter-TSS (AT5G03220.1)	promoter-TSS (AT5G03220.1)	451	AT5G03230.1	831900	At.1595	NM_120401		AT5G03230	F15A17.260|F15A17_260	senescence regulator (Protein of unknown function, DUF584)	protein-coding
merged_clf_H3K9_q_0.05_with_ctrl.peaks_peak_12123	4	1306597	1307363	+	214	NA	exon (AT4G02940.1, exon 1 of 7)	exon (AT4G02940.1, exon 1 of 7)	667	AT4G02940.1	828132	At.20270	NM_116528		AT4G02940	T4I9.18|T4I9_18	oxidoreductase, 2OG-Fe(II) oxygenase family protein	protein-coding
merged_clf_H3K9_q_0.05_with_ctrl.peaks_peak_6814	2	14044262	14045491	+	214	NA	intron (AT2G33120.1, intron 1 of 4)	intron (AT2G33120.1, intron 1 of 4)	667	AT2G33120.2	817874	At.20250	NM_128872		SAR1	ARABIDOPSIS THALIANA VESICLE-ASSOCIATED MEMBRANE PROTEIN 722|ATVAMP722|F25I18.14|F25I18_14|VAMP722|synaptobrevin-related protein 1	synaptobrevin-related protein 1	protein-coding
merged_clf_H3K9_q_0.05_with_ctrl.peaks_peak_8176	3	397687	399666	+	214	NA	exon (AT3G02170.3, exon 3 of 4)	exon (AT3G02170.3, exon 3 of 4)	1122	AT3G02170.2	821279	At.23828	NM_111084		LNG2	F1C9.4|LONGIFOLIA2|TON1 Recruiting Motif 1|TRM1	longifolia2	protein-coding
merged_clf_H3K9_q_0.05_with_ctrl.peaks_peak_3812	1	24361310	24361946	+	214	NA	TTS (AT1G65540.2)	TTS (AT1G65540.2)	426	AT1G65520.1	842864	At.35874	NM_105226		ECI1	''delta(3)|ARABIDOPSIS THALIANA DELTA(3)|ATECI1|DELTA(2)-ENOYL COA ISOMERASE 1|ECHIC|ENOYL-COA HYDRATASE/ISOMERASE C|F5I14.5|F5I14_5|PEC11|delta(2)-enoyl CoA isomerase 1|delta(2)-enoyl CoA isomerase 1''|delta(3)	delta(3), delta(2)-enoyl CoA isomerase 1	protein-coding
merged_clf_H3K9_q_0.05_with_ctrl.peaks_peak_14139	4	15414441	15415892	+	214	NA	TTS (at4g31877)	TTS (at4g31877)	355	ENSRNA049758063-T1
merged_clf_H3K9_q_0.05_with_ctrl.peaks_peak_15831	5	4070134	4071165	+	214	NA	exon (AT5G12890.1, exon 1 of 1)	exon (AT5G12890.1, exon 1 of 1)	600	AT5G12890.1	831129	At.28295	NM_121292		AT5G12890	T24H18.60|T24H18_60	UDP-Glycosyltransferase superfamily protein	protein-coding
merged_clf_H3K9_q_0.05_with_ctrl.peaks_peak_2426	1	11612145	11613255	+	214	NA	intron (AT1G32230.3, intron 1 of 6)	intron (AT1G32230.3, intron 1 of 6)	582	AT1G32230.3	840115	At.10171	NM_102956		RCD1	ARABIDOPSIS THALIANA P8 (INTERACTING PROTEIN)|ATP8|AtRCD1|CEO|CEO1|F3C3.1|F3C3_1|RADICAL-INDUCED CELL DEATH1|REDOX IMBALANCED 1|RIMB1	WWE protein-protein interaction domain protein family	protein-coding
merged_clf_H3K9_q_0.05_with_ctrl.peaks_peak_937	1	4244320	4245580	+	214	NA	intron (AT1G12450.1, intron 1 of 3)	intron (AT1G12450.1, intron 1 of 3)	1046	AT1G12450.1	837802	At.15260	NM_101117		AT1G12450	F5O11.19|F5O11_19	SNARE associated Golgi protein family	protein-coding
merged_clf_H3K9_q_0.05_with_ctrl.peaks_peak_11294	3	20892819	20893415	+	214	NA	TTS (AT3G56350.1)	TTS (AT3G56350.1)	361	AT3G56340.1	824801	At.5076	NM_115492		AT3G56340	T5P19.4	Ribosomal protein S26e family protein	protein-coding
merged_clf_H3K9_q_0.05_with_ctrl.peaks_peak_3397	1	21707438	21707968	+	214	NA	exon (AT1G58420.1, exon 1 of 1)	exon (AT1G58420.1, exon 1 of 1)	528	AT1G58420.1	842211	At.42952	NM_104622		AT1G58420	F9K23.5|F9K23_5	Uncharacterized conserved protein UCP031279	protein-coding
merged_clf_H3K9_q_0.05_with_ctrl.peaks_peak_12714	4	8376495	8377065	+	214	NA	TTS (AT4G14590.1)	TTS (AT4G14590.1)	380	AT4G14600.1	827108	At.33264	NM_117540		AT4G14600	DL3340W|FCAALL.126	Target SNARE coiled-coil domain protein	protein-coding
merged_clf_H3K9_q_0.05_with_ctrl.peaks_peak_5029	1	30084151	30084819	+	214	NA	promoter-TSS (ENSRNA049492579-T1)	promoter-TSS (ENSRNA049492579-T1)	371	AT1G79985.1	28717438	At.22078	NM_001124152		AT1G79985	-	structural molecules protein	protein-coding
merged_clf_H3K9_q_0.05_with_ctrl.peaks_peak_10475	3	16756791	16758515	+	214	NA	promoter-TSS (AT3G45645.1)	promoter-TSS (AT3G45645.1)	-869	AT3G45645.1	28719381		NM_001339213		AT3G45645	-	transmembrane protein	protein-coding
merged_clf_H3K9_q_0.05_with_ctrl.peaks_peak_4608	1	28219406	28220235	+	214	NA	TTS (AT1G75200.1)	TTS (AT1G75200.1)	438	AT1G75190.2	843856	At.34806	NM_106175		AT1G75190	F22H5.8|F22H5_8	hypothetical protein	protein-coding
merged_clf_H3K9_q_0.05_with_ctrl.peaks_peak_4459	1	27639239	27640418	+	214	NA	exon (AT1G73500.1, exon 1 of 1)	exon (AT1G73500.1, exon 1 of 1)	815	AT1G73500.1	843685	At.27674	NM_106009		MKK9	ATMKK9|MAP kinase kinase 9|T9L24.32|T9L24_32	MAP kinase kinase 9	protein-coding
merged_clf_H3K9_q_0.05_with_ctrl.peaks_peak_5380	2	1644590	1645277	+	214	NA	intron (AT2G04690.1, intron 1 of 5)	intron (AT2G04690.1, intron 1 of 5)	436	AT2G04690.5	815012	At.41279	NM_126499		AT2G04690	F28I8.27|F28I8_27	Pyridoxamine 5'-phosphate oxidase family protein	protein-coding
merged_clf_H3K9_q_0.05_with_ctrl.peaks_peak_292	1	1202263	1203603	+	214	NA	intron (AT1G04440.1, intron 1 of 13)	intron (AT1G04440.1, intron 1 of 13)	773	AT1G04440.1	839520	At.22161	NM_100324		CKL13	F19P19.10|F19P19_10|casein kinase like 13	casein kinase like 13	protein-coding
merged_clf_H3K9_q_0.05_with_ctrl.peaks_peak_4273	1	26830679	26831524	+	213	NA	promoter-TSS (AT1G71160.1)	promoter-TSS (AT1G71160.1)	498	AT1G71170.1	843457	At.12951	NM_105786		AT1G71170	F23N20.16|F23N20_16	6-phosphogluconate dehydrogenase family protein	protein-coding
merged_clf_H3K9_q_0.05_with_ctrl.peaks_peak_17955	5	20474512	20474992	+	213	NA	intron (AT5G50310.1, intron 1 of 19)	intron (AT5G50310.1, intron 1 of 19)	295	AT5G50310.1	835096	At.26409	NM_124410		AT5G50310	MXI22.1|MXI22_1	Galactose oxidase/kelch repeat superfamily protein	protein-coding
merged_clf_H3K9_q_0.05_with_ctrl.peaks_peak_17968	5	20536419	20537058	+	213	NA	TTS (AT5G50440.1)	TTS (AT5G50440.1)	333	AT5G50430.2	835111	At.6859	NM_124425		UBC33	MXI22.15|MXI22_15|ubiquitin-conjugating enzyme 33	ubiquitin-conjugating enzyme 33	protein-coding
merged_clf_H3K9_q_0.05_with_ctrl.peaks_peak_235	1	933654	934662	+	213	NA	exon (AT1G03740.1, exon 1 of 7)	exon (AT1G03740.1, exon 1 of 7)	714	AT1G03740.1	839423	At.15590	NM_100253		AT1G03740	F21B7.34	Protein kinase superfamily protein	protein-coding
merged_clf_H3K9_q_0.05_with_ctrl.peaks_peak_4340	1	27157926	27159161	+	213	NA	TTS (AT1G72170.1)	TTS (AT1G72170.1)	668	AT1G72175.2	843549	At.19073	NM_105876		AT1G72175	-	E3 ubiquitin-protein ligase RNF170-like protein (DUF 1232)	protein-coding
merged_clf_H3K9_q_0.05_with_ctrl.peaks_peak_664	1	2994412	2995137	+	213	NA	TTS (AT1G09260.1)	TTS (AT1G09260.1)	360	AT1G09270.3	837448	At.48171	NM_100797		IMPA-4	T12M4.2|T12M4_2|importin alpha isoform 4	importin alpha	protein-coding
merged_clf_H3K9_q_0.05_with_ctrl.peaks_peak_17385	5	17098352	17099348	+	213	NA	exon (AT5G42650.1, exon 1 of 1)	exon (AT5G42650.1, exon 1 of 1)	745	AT5G42650.1	834273	At.211	NM_123629		AOS	CYP74A|CYTOCHROME P450 74A|DDE2|DELAYED DEHISCENCE 2|allene oxide synthase	allene oxide synthase	protein-coding
merged_clf_H3K9_q_0.05_with_ctrl.peaks_peak_6729	2	13635175	13635870	+	213	NA	exon (AT2G32040.1, exon 2 of 9)	exon (AT2G32040.1, exon 2 of 9)	416	AT2G32040.2	817764	At.38125	NM_128764		AT2G32040	F22D22.21|F22D22_21	Major facilitator superfamily protein	protein-coding
merged_clf_H3K9_q_0.05_with_ctrl.peaks_peak_6081	2	9917560	9918499	+	213	NA	TTS (AT2G23300.1)	TTS (AT2G23300.1)	509	AT2G23310.2	816863	At.25538	NM_127895		ATRER1C1	ATRER1C|T20D16.6|T20D16_6	Rer1 family protein	protein-coding
merged_clf_H3K9_q_0.05_with_ctrl.peaks_peak_647	1	2884413	2885529	+	213	NA	TTS (AT1G08970.4)	TTS (AT1G08970.4)	620	AT1G08980.1	837418	At.21299	NM_100769		AMI1	AMIDASE-LIKE PROTEIN 1|ARABIDOPSIS THALIANA TRANSLOCON AT THE OUTER MEMBRANE OF CHLOROPLASTS 64-I|ATAMI1|ATTOC64-I|TOC64-I|TRANSLOCON AT THE OUTER MEMBRANE OF CHLOROPLASTS 64-I|amidase 1	amidase 1	protein-coding
merged_clf_H3K9_q_0.05_with_ctrl.peaks_peak_14438	4	16708643	16710023	+	213	NA	exon (AT4G35100.1, exon 2 of 4)	exon (AT4G35100.1, exon 2 of 4)	781	AT4G35100.2	829662	At.20518	NM_119676		PIP3	PIP2;7|PIP3A|PLASMA MEMBRANE INTRINSIC PROTEIN 2;7|PLASMA MEMBRANE INTRINSIC PROTEIN 3|PLASMA MEMBRANE INTRINSIC PROTEIN 3A|SIMIP|T12J5.9|plasma membrane intrinsic protein 3	plasma membrane intrinsic protein 3	protein-coding
merged_clf_H3K9_q_0.05_with_ctrl.peaks_peak_5090	1	30305381	30306407	+	213	NA	exon (AT1G80620.1, exon 1 of 5)	exon (AT1G80620.1, exon 1 of 5)	872	AT1G80620.1	844401	At.44637	NM_179583		AT1G80620	-	S15/NS1, RNA-binding protein	protein-coding
merged_clf_H3K9_q_0.05_with_ctrl.peaks_peak_10398	3	15866692	15867311	+	213	NA	intron (AT3G44100.1, intron 1 of 3)	intron (AT3G44100.1, intron 1 of 3)	533	AT3G44100.1	823530	At.5322	NM_114278		AT3G44100	-	MD-2-related lipid recognition domain-containing protein	protein-coding
merged_clf_H3K9_q_0.05_with_ctrl.peaks_peak_9665	3	6934801	6936238	+	213	NA	exon (AT3G19930.2, exon 3 of 5)	exon (AT3G19930.2, exon 3 of 5)	892	AT3G19930.2	821531	At.187	NM_112883		STP4	ATSTP4|SUGAR TRANSPORTER 4|sugar transporter 4	sugar transporter 4	protein-coding
merged_clf_H3K9_q_0.05_with_ctrl.peaks_peak_2878	1	18452131	18452879	+	213	NA	exon (AT1G49840.1, exon 1 of 3)	exon (AT1G49840.1, exon 1 of 3)	759	AT1G49840.1	841407	At.28492	NM_103871		AT1G49840	F10F5.2|F10F5_2	glutamyl-tRNA (Gln) amidotransferase subunit A (DUF620)	protein-coding
merged_clf_H3K9_q_0.05_with_ctrl.peaks_peak_17700	5	19046490	19047263	+	213	NA	promoter-TSS (AT5G06885.1)	promoter-TSS (AT5G06885.1)	43	AT5G06885.1	28720846		NR_142958		AT5G06885	-	ncRNA	ncRNA
[truncated: 17,949 more rows]
