# Supplementary material for: Polycomb-dependent differential chromatin compartmentalization determines gene coregulation in Arabidopsis
Source: HighWire-hosted journal article supplement (doi:10.1101/gr.273771.120), 2021-06-03
Supplement: Supplemental_Table_S23.xlsx [file Supplemental_Table_S23.xlsx]

## Sheet: S23
Supplementary Table S23: Gene_list-clf_H3k9_peaks
AT4G05150
AT4G12450
AT2G38250
AT1G02660
AT1G07323
AT4G37790
AT3G13440
AT4G05320
AT4G18010
AT3G02880
AT4G40050
AT3G60110
AT4G36010
AT3G07555
AT3G62660
AT4G06634
AT3G55950
AT5G05440
AT4G32020
AT4G05050
AT1G22530
AT3G05320
AT1G01550
AT4G17500
AT1G28280
AT1G09970
AT4G37270
AT1G25400
AT5G04510
AT3G19380
AT2G09265
AT4G23060
AT3G15210
AT2G23321
AT3G24050
AT1G78100
AT4G32030
AT5G62560
AT4G31550
AT5G03380
AT4G38550
AT4G00330
AT2G01850
AT2G25490
AT2G29970
AT1G11260
AT2G22800
AT4G36920
AT3G24550
AT5G21930
AT4G35740
AT2G01190
AT2G06050
AT1G59910
AT2G25460
AT1G12110
AT4G40070
AT2G17442
AT3G30775
AT3G02610
AT4G07825
AT4G16110
AT4G00370
AT2G30740
AT4G02600
AT5G57565
AT1G72150
AT1G18720
AT5G49440
AT1G22370
AT1G01490
AT4G25390
AT2G32140
AT5G47910
AT3G07360
AT4G40060
AT2G18160
AT3G50650
AT3G54000
AT3G01885
AT2G20670
AT1G03730
AT5G05598
AT1G76600
AT5G28770
AT3G11700
AT4G36900
AT2G01670
AT4G21200
AT5G00990
AT1G08930
AT1G57850
AT5G04185
AT5G24890
AT5G65158
AT3G09145
AT2G23450
AT2G46320
AT4G00150
AT4G22190
AT2G47860
AT4G29950
AT4G23880
AT5G04310
AT2G41640
AT2G03700
AT4G33180
AT3G15500
AT4G35985
AT1G25560
AT4G35485
AT5G23850
AT4G26690
AT3G61180
AT3G19030
AT3G15820
AT3G62160
AT5G66060
AT3G28340
AT1G26921
AT2G41420
AT4G31510
AT3G20310
AT4G39100
AT2G26530
AT4G40040
AT3G09020
AT1G80840
AT4G06676
AT2G41870
AT2G43060
AT5G60680
AT5G66650
AT5G07090
AT1G45976
AT5G05140
AT1G20980
AT3G20770
AT3G25610
AT4G33980
AT5G01380
AT1G07010
AT2G36950
AT4G27310
AT3G57790
AT4G30350
AT1G01300
AT1G17620
AT5G59550
AT3G02140
AT4G18203
AT4G05071
AT5G61600
AT4G03390
AT5G22630
AT2G35710
AT4G12420
AT3G54810
AT3G50790
AT2G28080
AT2G30330
AT2G23118
AT2G43550
AT1G80610
AT1G13143
AT4G24230
AT2G04125
AT2G43700
AT2G47440
AT4G08580
AT4G12040
AT2G36320
AT2G24600
AT3G05220
AT4G13350
AT4G37180
AT4G39400
AT4G36990
AT4G38940
AT1G27300
AT2G47060
AT4G06746
AT1G25550
AT3G05490
AT1G32640
AT4G04920
AT3G53260
AT5G03040
AT4G02370
AT2G30020
AT3G50340
AT3G46630
AT5G08975
AT1G28380
AT5G01100
AT3G56050
AT5G03110
AT4G34390
AT4G39780
ENSRNA049757954-T1
AT4G02590
AT2G46493
AT1G49500
AT5G18310
AT4G20260
AT3G13300
AT1G75710
AT4G30440
AT1G78240
AT5G59820
AT5G57660
AT5G18140
AT4G29780
AT3G03745
AT2G15580
AT3G12830
AT5G54380
AT3G06085
AT4G37608
AT5G47650
AT2G05812
AT4G24810
AT1G32470
AT2G44500
AT2G18090
AT1G22280
AT1G27100
at2g46685
AT2G17290
AT4G05010
AT3G27825
AT4G17870
AT1G07119
AT3G26400
AT3G25860
AT4G40085
AT1G21010
AT2G08965
AT1G70090
AT3G56880
AT5G12170
AT2G30925
AT3G14180
AT1G57990
AT1G30330
AT2G15320
AT2G06530
AT4G35370
AT5G62000
AT2G01480
AT3G62720
AT3G61260
AT2G19570
AT3G02910
AT4G18070
AT4G13340
AT3G04650
AT2G46740
AT2G42670
AT3G52810
AT4G22770
AT1G28330
AT3G28200
AT3G23170
AT4G00230
AT1G78270
AT4G01720
AT1G15670
AT4G25190
AT2G46510
AT2G44735
AT1G30200
AT1G31350
AT3G44280
AT3G58790
AT1G70510
AT1G76160
AT5G03700
AT1G15910
AT4G15130
AT3G02750
AT2G19800
AT2G40095
AT1G70590
AT4G15790
AT3G49350
AT4G40063
AT2G18340
AT3G50830
AT2G05940
AT1G80910
AT4G18670
AT3G10985
AT1G15150
AT2G36470
AT1G58100
AT4G36648
AT5G02130
AT3G52710
AT5G11975
AT1G30757
AT2G23100
AT1G76900
AT4G00295
AT2G14080
AT2G45685
AT1G20330
AT4G12690
AT2G22300
AT4G08540
AT4G23660
AT1G05805
AT3G07770
AT4G34150
AT3G02830
AT2G39870
AT1G43245
AT3G49790
AT1G68670
AT3G07480
AT4G29360
AT2G17480
AT5G65207
AT3G27210
AT2G07042
AT5G44260
AT1G36050
AT4G27657
AT1G17990
AT1G17150
AT2G18450
AT1G17380
AT1G72520
AT4G26080
AT3G11820
AT3G19580
AT1G74950
AT3G20830
AT2G26110
AT4G33920
AT1G13390
AT2G39480
AT1G21910
AT5G63900
AT3G15200
AT5G61580
AT3G12835
AT3G02585
AT2G18730
AT3G57550
AT1G02813
AT5G43260
AT4G16780
AT4G03020
AT2G17520
AT5G66200
AT1G09250
AT1G08920
AT4G13400
ENSRNA049492449-T1
AT3G24480
AT4G30620
AT5G14720
AT4G28088
AT3G63400
AT3G17510
AT4G07390
AT1G80440
AT1G76080
AT1G13260
AT4G25170
AT2G41120
AT3G01435
AT1G33590
AT5G02840
AT2G36420
AT1G41880
AT3G23820
AT1G27750
AT4G29610
AT4G05160
AT5G50450
AT2G44798
AT3G63255
AT4G36040
AT1G18210
AT4G37240
AT5G42050
AT4G00730
AT1G64455
AT4G02410
AT1G18020
AT4G39390
AT2G34600
AT3G06435
AT1G06380
AT4G37690
AT1G07135
AT1G52880
AT5G65470
AT2G23340
AT2G46160
AT5G15630
AT3G57330
AT5G21090
AT3G02540
AT1G02610
AT2G03800
AT4G33985
AT1G21000
AT3G44260
AT3G59080
AT1G08320
AT2G30260
AT3G04245
AT4G00585
AT2G23290
AT1G09647
AT1G72470
AT1G74940
AT5G62573
AT5G03730
AT5G20250
AT3G16860
AT1G69910
AT5G64380
AT1G72430
AT1G78040
AT5G01542
AT3G03550
AT3G11420
AT3G12640
AT5G49280
AT1G69880
AT4G00040
AT4G06599
AT2G42040
AT5G67290
AT4G23180
AT3G18815
AT1G75800
AT4G27960
AT4G30370
AT2G22720
AT4G12230
AT2G22500
AT2G47410
AT3G24490
AT4G12080
AT2G46200
AT4G27410
AT4G30210
AT3G15510
AT5G53750
AT5G49450
AT4G36810
AT4G03510
AT5G66675
AT1G60870
AT2G41490
AT4G31800
AT1G68410
AT4G23750
AT4G16500
AT4G12250
AT2G38290
AT5G10370
AT2G46620
AT2G01070
AT5G67190
AT5G11740
AT5G26770
AT2G35940
AT1G54740
AT1G72416
AT4G34480
AT4G18880
AT1G76170
AT3G13720
AT1G43130
AT3G53950
AT5G64660
AT4G34910
AT1G32930
AT5G55800
AT2G40270
AT5G22680
AT1G76520
AT1G14687
AT3G23030
AT1G11210
AT2G46505
AT2G04305
AT3G07580
AT1G29300
AT2G33570
AT1G63860
AT5G64750
AT3G59068
AT3G22370
AT1G78900
AT2G38240
AT5G43760
AT1G07240
AT3G55050
AT1G77060
AT5G14580
AT4G14890
AT1G14780
AT4G30260
AT5G07220
AT2G25450
AT4G19520
AT1G04430
AT3G06380
AT3G18915
AT5G25210
AT4G38810
AT5G67420
AT3G02895
AT3G45730
AT5G57590
AT2G24945
ENSRNA049492411-T1
AT2G03470
AT1G72755
AT5G67160
AT1G67265
AT1G69900
AT1G56145
AT1G80960
AT5G16110
AT1G75540
AT3G51960
AT5G08240
AT5G62720
AT4G09580
AT1G22310
AT5G60460
AT3G08185
AT5G13090
AT2G03340
AT1G01180
AT5G67630
AT3G18980
AT1G34200
AT5G13490
AT2G33830
AT2G22430
AT3G19010
AT2G35300
AT4G19390
AT3G07350
AT5G05810
AT3G02915
AT5G04490
AT1G78310
AT4G19130
AT5G57910
AT1G76185
AT1G03365
AT4G08950
AT3G47620
AT5G18490
AT1G49040
AT5G35930
AT1G02400
AT2G14045
AT2G39650
AT1G08580
AT4G29590
AT5G62070
AT4G01250
AT4G23190
AT3G45300
AT1G66180
AT4G01710
AT3G20600
AT3G62410
AT1G07901
AT1G19376
AT3G08710
AT2G27770
AT2G21660
AT2G04850
AT5G25170
AT1G09640
AT5G06065
AT1G44446
AT3G14090
AT1G29340
AT1G08573
AT5G17890
AT5G04340
AT5G05450
AT1G12020
AT1G06515
AT1G65000
AT3G47940
AT1G03080
AT3G01370
AT4G20880
AT5G62220
AT4G36550
AT1G16100
AT1G54050
AT3G46610
AT2G25800
AT1G07090
AT1G13870
AT4G16760
AT2G23672
AT1G50640
AT2G23610
AT3G07390
AT3G09740
AT2G28500
AT2G20180
AT3G46600
AT2G30362
AT2G36410
AT5G09855
AT3G21825
AT5G10760
AT2G31680
AT1G06400
AT3G55980
AT5G15410
AT4G31610
AT5G13760
AT5G24430
AT5G65430
AT3G08605
AT1G48520
AT1G06560
AT5G13100
AT4G25680
AT4G03550
AT5G13710
AT2G34650
AT3G05870
AT5G21170
AT3G50500
AT3G26670
at4g04125
AT1G21900
AT5G04320
AT4G32130
AT3G15790
AT3G04920
AT5G65683
AT5G08780
AT5G37780
AT5G47220
AT4G25470
AT3G52480
AT2G42350
AT5G02190
AT1G21450
AT4G07950
AT4G21700
AT5G12010
AT5G17600
AT1G35350
AT1G20450
AT3G06850
AT2G32150
AT3G46530
AT1G01140
AT1G15800
AT1G75950
AT5G13850
AT2G13790
AT2G36050
AT3G17250
AT3G56410
AT5G59010
AT5G18130
AT4G24020
AT1G55140
AT2G17550
AT1G52290
AT2G20921
AT1G32700
AT1G71090
AT1G22570
AT2G35930
AT1G59590
AT2G06520
AT2G32190
AT1G70290
AT1G46768
AT1G69760
AT2G30440
AT1G05010
AT1G20620
AT5G16120
AT4G22000
AT5G57710
AT3G52400
AT4G19450
AT2G40140
AT5G01720
AT3G61460
AT5G43880
AT4G39917
AT3G57530
AT1G53910
AT3G28920
AT4G34530
AT5G02045
AT1G21830
AT1G53570
AT2G41000
AT3G59060
AT5G09440
AT5G09785
AT1G79650
AT5G25220
AT4G02350
AT3G07460
AT1G23710
AT3G15351
AT3G47160
AT5G11530
AT3G04400
AT1G04227
AT5G58800
AT5G10450
AT5G52240
AT4G25200
AT5G11560
AT2G31985
AT1G69270
AT3G44570
AT1G72510
AT4G30270
AT1G63090
AT3G60690
AT5G61480
AT1G72450
AT4G20380
AT4G33580
AT3G14595
AT1G07150
AT3G62260
AT3G61630
AT4G22780
AT5G16210
AT3G06710
AT4G12290
AT4G32150
AT3G46010
AT4G24660
AT5G57300
AT5G54720
AT1G44350
AT4G27320
AT1G24530
AT1G66890
AT1G72330
AT3G05940
AT3G03740
AT1G11050
AT1G69295
AT1G71710
AT1G20440
AT2G27590
AT5G19140
AT4G32140
AT4G09375
AT4G26540
AT5G61910
AT1G68840
AT5G64880
AT1G10690
AT1G28580
AT5G42440
AT1G37130
AT1G32920
AT3G56710
AT2G43470
AT5G64260
AT3G56400
AT4G31420
AT3G25880
AT1G67290
AT4G40042
AT1G09523
AT2G31100
AT2G28950
AT1G47128
AT5G03520
AT2G45590
AT1G78080
AT5G67500
AT5G01255
AT1G63810
AT1G01100
AT3G23590
AT1G64080
AT5G47190
AT5G67385
AT5G20050
AT5G62350
AT1G07630
AT5G60710
AT2G01730
AT1G70580
AT1G66350
AT2G25190
AT4G01935
AT4G33940
AT5G11890
ENSRNA049492664-T1
AT4G23320
AT5G59420
AT1G76878
AT4G11160
AT3G57460
AT5G38710
AT1G11360
AT5G16840
AT1G58180
AT1G14430
AT5G11610
AT2G07340
AT5G05360
AT5G10740
AT3G22970
AT2G08475
AT1G78260
AT4G32480
AT1G35210
AT1G66150
AT3G43540
AT5G67560
AT1G26730
AT1G71970
AT1G09160
AT1G22380
AT1G08667
at1g73687
AT3G04910
AT3G61640
ENSRNA049758093-T1
AT5G06700
AT2G16280
AT5G21960
AT1G19840
AT5G67580
AT1G76970
AT4G16140
AT4G02130
AT4G21610
AT1G01500
AT3G61210
AT5G65930
AT5G19090
AT1G76410
AT1G72830
AT4G29250
AT3G15780
AT1G02650
AT2G21870
AT5G64410
AT1G74740
AT3G14270
AT1G73780
AT2G08900
AT4G03420
AT3G01830
AT3G48530
AT5G63145
AT1G23040
AT5G66790
AT1G77490
AT5G46780
AT1G09950
AT2G18680
AT1G78210
AT3G22380
AT5G58370
AT5G54390
AT4G00850
AT4G05090
AT2G46500
AT4G05535
AT3G47820
AT4G04335
AT5G08150
AT4G21920
AT3G04720
AT4G37640
AT4G16380
AT3G22890
AT1G32790
AT5G58440
AT5G55040
AT4G33310
AT3G14050
AT3G08085
AT1G03440
AT5G53310
AT4G09035
AT5G25930
AT1G01540
AT5G09870
AT3G27880
AT3G01120
AT5G20190
AT4G08925
AT5G25360
AT3G62150
AT2G44510
AT1G35560
AT4G25620
AT5G57210
AT2G05920
AT4G20970
AT3G04590
AT5G09740
AT4G21790
AT4G32160
AT5G63160
AT5G01017
AT5G18610
AT2G36230
AT5G56240
AT1G49780
AT2G39090
AT1G65720
AT3G04730
AT1G08570
AT1G72790
AT3G60961
AT1G10350
AT5G40140
AT3G01525
AT5G26751
AT5G63640
AT5G14730
AT4G23270
AT5G62530
AT1G53430
AT1G74450
AT1G23020
AT5G15350
AT3G09775
AT3G15480
AT4G03400
AT4G20860
AT1G15085
AT4G28400
AT3G56120
AT2G09990
AT2G24180
AT1G80300
AT2G48090
AT1G17340
AT4G17486
AT5G65610
AT3G20660
AT1G16910
AT3G54600
AT5G50900
AT5G37485
AT5G05430
AT4G03380
AT5G17847
AT5G02155
AT3G14440
AT3G15635
AT2G23380
AT5G01150
AT1G64380
AT2G21520
AT3G47550
AT1G04400
AT5G27950
AT3G42790
AT4G21740
AT5G09690
AT1G76920
AT4G32340
AT5G41400
AT2G17880
AT3G29034
AT3G48760
AT1G03890
AT1G11650
AT3G52450
AT5G57000
AT5G06440
AT2G20120
AT2G42030
AT5G60265
AT2G38185
AT3G03980
AT3G26510
AT5G01520
AT3G60400
AT2G40380
AT2G38610
AT2G01720
AT2G24545
AT1G18310
AT1G69310
AT1G18530
AT4G02760
AT5G19330
AT3G60260
AT2G01290
AT2G44820
AT3G47660
AT1G51380
AT3G20320
AT3G07050
AT5G03650
AT1G70300
AT5G35735
AT2G39570
AT4G02100
AT4G24400
AT5G44570
AT2G27310
AT2G30280
AT3G62800
AT5G02230
AT5G03185
AT3G08230
AT2G42600
AT2G25900
AT2G05518
AT5G03965
AT1G24140
AT2G02870
AT4G35335
AT5G27395
AT3G10920
AT1G18550
AT5G19130
AT5G63530
AT1G05453
AT1G12440
AT5G37760
AT3G54100
AT1G73740
AT1G34418
AT4G16566
AT1G60140
AT4G39910
AT1G13350
AT1G25280
AT2G20635
AT2G28490
AT3G49990
AT2G45670
AT3G14205
AT3G60320
AT1G49660
AT4G38530
AT5G37130
AT1G51805
AT1G35140
AT3G45770
AT1G02350
AT3G03675
AT1G32750
AT1G62590
AT3G08730
AT3G07380
AT3G09390
AT1G11380
AT5G44063
AT2G27500
AT1G76090
AT5G28920
AT4G00570
AT4G08245
AT1G11700
AT4G20960
AT5G21990
AT2G45160
AT5G62340
AT4G23570
AT5G04550
AT2G43465
AT5G22920
AT3G01910
AT4G04480
AT1G42540
AT2G45730
AT1G13210
AT4G02075
AT3G21220
AT2G35270
AT4G17240
AT1G74929
AT3G47120
AT2G39350
AT1G32690
AT5G55310
AT1G07160
AT4G17230
AT5G07830
AT5G37070
AT4G01090
AT3G15030
AT1G08607
AT4G23730
AT4G23010
AT2G28350
AT2G47850
AT3G21270
AT4G39570
AT5G55950
AT3G48780
AT5G45340
AT1G14740
AT3G15070
AT3G16857
AT5G02290
AT4G09160
AT2G31730
AT5G46510
AT5G01005
AT5G04170
AT1G58150
AT3G14590
AT1G74010
AT3G13790
AT4G18890
AT1G72700
AT5G20885
AT3G21800
AT3G14840
AT4G26890
AT2G41210
AT1G76892
AT4G21445
AT3G11395
AT3G57120
AT2G44330
AT5G17860
AT5G13810
AT1G16840
AT5G41810
AT2G47070
AT4G02430
AT4G03955
AT4G03925
AT1G17410
AT2G13450
AT1G04013
AT5G51510
AT4G39820
AT4G24100
AT5G09285
AT4G36720
AT5G16590
AT2G31810
AT5G01970
AT2G22795
AT5G10140
AT1G15230
AT1G69940
AT2G46710
AT1G58470
AT5G42090
AT2G02070
AT4G17460
AT1G52300
AT5G03500
AT1G03410
AT2G44090
AT2G23350
AT4G26130
AT1G27910
AT2G36960
AT5G64630
AT2G25240
AT4G05775
AT3G20410
AT3G02090
AT2G36080
AT2G32030
AT4G16890
AT1G15390
AT2G42870
AT4G34180
AT5G05170
AT2G41760
AT2G01570
AT4G01750
AT5G55850
AT4G19200
AT3G30380
AT1G12750
AT1G35160
AT4G27520
AT5G61130
AT5G56985
AT5G39590
AT2G20784
AT1G75990
AT2G09745
AT5G11060
AT3G16760
AT3G19540
AT4G07960
AT5G65700
AT5G21105
AT5G45100
AT2G35790
AT4G07655
AT5G66320
AT5G43190
AT4G08900
AT1G75240
AT3G59880
AT1G53230
AT5G41090
AT3G05170
AT5G65050
AT1G49950
AT4G00752
AT1G68690
AT1G25390
AT4G23170
AT2G29410
AT2G46080
AT1G03600
AT4G38470
AT1G65960
AT3G05200
AT3G51080
AT3G49210
AT3G28460
AT5G42900
AT4G39880
AT2G02860
AT3G28180
AT2G09795
AT4G18920
AT1G05137
AT1G70000
AT2G35470
AT5G32450
AT5G58100
AT3G01495
AT4G19185
AT1G30620
AT4G23860
AT1G12330
AT5G64560
AT5G35100
AT1G23050
AT1G04513
AT5G17780
AT3G11750
AT3G54200
AT1G07293
AT1G27770
AT5G48545
AT5G09565
AT3G24530
AT1G21928
AT5G58900
AT3G01655
AT3G61070
AT5G18680
AT5G15330
AT5G43910
AT1G09570
AT3G60190
AT3G09980
AT2G03060
AT1G17420
AT2G08945
AT4G26060
AT5G55130
AT5G33290
AT2G41890
AT5G22240
AT1G11180
AT4G33300
AT2G03630
AT2G09755
AT2G21190
AT5G18170
AT1G70420
AT1G49360
AT3G48990
AT1G73480
AT1G47970
AT1G05193
AT2G18750
AT3G23440
AT1G13960
AT5G42840
AT2G02180
AT4G21570
AT4G05685
AT5G58530
AT3G05155
AT5G46080
AT3G26070
AT1G11930
AT3G18790
AT1G23870
AT3G14230
AT1G07503
AT5G01375
AT4G17250
AT5G45630
AT5G43060
AT5G65920
AT1G79370
AT1G68460
AT5G56260
AT3G05550
AT1G11310
AT1G70740
AT1G53633
AT1G73066
AT2G47730
AT5G51380
AT3G03130
AT1G27130
AT4G16442
AT5G14900
AT3G56800
AT2G48030
AT1G69380
AT4G09420
AT2G16070
AT5G64300
AT5G10965
AT1G20691
AT5G56270
AT1G14720
AT1G65710
AT4G38910
AT1G03860
AT5G25240
AT4G34980
AT2G06605
AT3G06815
AT5G66210
AT2G24790
AT5G53300
AT1G22882
AT1G11820
AT2G48010
AT1G80180
AT4G28230
AT4G32050
AT3G23550
AT5G62910
AT1G66760
AT5G08175
AT3G04210
AT2G46380
AT2G01180
AT2G30970
AT1G53840
AT5G09385
AT4G13650
AT2G47890
AT3G04090
AT3G10720
AT4G27540
AT5G22940
AT2G40390
AT4G26410
AT5G08130
AT1G36730
AT3G62950
AT1G63840
AT2G47960
AT2G09905
AT5G63380
AT1G53390
AT1G14200
ENSRNA049492640-T1
AT1G04147
AT5G03220
AT4G02940
AT2G33120
AT3G02170
AT1G65540
at4g31877
AT5G12890
AT1G32230
AT1G12450
AT3G56350
AT1G58420
AT4G14590
ENSRNA049492579-T1
AT3G45645
AT1G75200
AT1G73500
AT2G04690
AT1G04440
AT1G71160
AT5G50310
AT5G50440
AT1G03740
AT1G72170
AT1G09260
AT5G42650
AT2G32040
AT2G23300
AT1G08970
AT4G35100
AT1G80620
AT3G44100
AT3G19930
AT1G49840
AT5G06885
AT3G48360
AT1G61260
AT3G29010
AT4G32290
AT1G19180
AT1G21980
AT5G10080
AT1G70820
AT1G76660
AT3G28950
AT2G27840
AT3G52470
AT3G13380
AT3G60300
AT2G22680
AT3G02785
AT1G59970
AT1G29250
AT5G62860
AT3G18060
AT1G50325
AT2G06005
AT4G08500
AT4G11300
AT3G49940
AT3G15460
AT1G49000
AT2G32240
AT1G04300
AT1G63120
AT1G80900
AT5G48340
AT1G22190
AT5G27420
AT4G21910
AT1G05993
AT4G29658
AT4G09535
AT1G30360
AT3G61620
AT5G10780
AT5G18280
AT4G13505
AT1G80865
AT1G67340
AT2G22470
AT4G37250
AT4G14370
AT4G24565
AT2G45620
AT4G36830
AT2G41180
AT5G63410
AT2G43680
AT2G40760
AT4G17615
AT1G04550
AT5G22330
AT5G66770
AT2G14265
AT4G16490
AT2G24330
AT1G70150
AT1G09575
AT5G46860
AT1G11970
AT4G23870
AT5G05550
AT1G58290
AT1G59650
AT3G54030
AT1G20696
AT2G22780
AT3G21690
AT4G32970
AT5G39580
AT5G10550
AT3G01280
AT3G59350
AT1G05820
AT2G11035
AT1G04853
AT3G15111
AT5G61640
AT4G25120
AT2G25735
AT3G02340
AT4G15510
AT5G54110
AT1G31330
AT5G09450
AT2G01540
AT4G22290
AT5G66055
AT5G01750
AT4G01330
AT1G05763
AT1G13180
AT1G16120
AT1G29760
AT5G52010
AT2G15980
AT3G09735
AT2G18720
AT3G05120
AT3G23050
AT2G09420
AT1G51950
AT1G51660
AT5G40520
AT4G28490
AT3G47350
AT4G36808
AT5G41920
AT4G23460
AT1G07733
AT3G17100
AT3G45820
AT5G08335
AT1G17120
AT2G39000
AT4G36890
AT4G34220
AT4G01370
AT4G13520
AT4G35510
AT5G60390
AT5G14920
AT5G67610
AT2G14290
AT3G54440
AT4G08180
AT3G01390
AT5G65290
AT5G08125
AT1G76590
AT2G17870
AT1G51970
AT2G36310
AT1G80850
AT2G02360
AT3G44620
AT3G45100
AT5G53880
AT2G44020
AT2G23430
AT2G04515
AT3G22070
AT1G72420
AT5G40450
AT2G31940
AT2G39810
AT1G21400
AT3G33530
AT4G15258
AT4G22550
AT1G79800
AT5G28630
AT1G08890
AT1G54380
AT5G67440
AT1G23380
AT4G04960
AT2G21940
AT1G70370
AT5G57010
AT5G43320
AT4G16957
AT5G46295
AT5G02970
AT4G22840
AT5G32440
AT2G22450
AT4G07990
AT2G23810
AT1G04233
AT3G60080
AT1G78300
AT4G08930
AT4G04570
AT1G24170
AT3G18170
AT4G32800
AT3G62650
AT3G17400
AT4G28300
AT1G76640
AT4G25670
AT3G13560
AT4G35210
AT4G22580
AT5G10710
AT1G69252
AT4G36520
AT1G75760
AT5G09810
AT3G13772
AT3G07025
AT1G05077
AT2G19780
AT4G17616
AT5G52060
AT5G09876
AT2G24940
AT3G01500
AT1G02480
AT5G24590
AT4G36670
AT1G43900
AT2G30010
AT4G19840
AT2G41440
AT4G17950
AT1G62660
AT4G33870
AT1G70230
AT3G07470
AT1G10100
AT1G01360
AT4G00955
AT4G14385
AT5G46190
AT4G22260
AT3G63180
AT3G57400
AT5G42000
AT4G15490
AT4G13390
AT1G05280
AT3G54870
AT5G52050
AT3G04010
AT5G57655
AT2G19880
AT1G26120
AT1G02145
AT5G51140
AT4G14713
AT2G28830
AT1G02920
AT5G45260
AT1G73660
AT3G09180
AT2G04505
AT2G05710
AT3G26520
ENSRNA049757802-T1
AT2G28120
AT1G22520
AT1G45688
AT1G19835
AT2G02730
AT3G16750
AT5G47070
AT4G30340
AT5G01400
AT3G57880
AT2G39660
AT1G56225
AT1G74020
AT3G44020
AT5G52250
AT3G51870
AT4G25360
AT5G66335
AT4G22590
AT5G13200
AT5G08980
AT5G49700
AT5G57500
AT3G58620
AT1G66480
AT1G06000
AT5G47390
AT5G07590
AT5G52120
AT5G44210
AT4G36870
AT1G61890
AT5G63130
AT1G14000
AT4G12310
AT1G48310
AT4G24750
AT3G61670
AT5G25910
AT3G33520
AT2G40960
AT2G34530
AT5G52380
AT3G27960
AT2G01930
AT2G06925
AT3G24440
AT2G30990
AT3G05690
AT1G75970
AT1G09903
AT3G03870
AT3G14240
AT2G37100
AT1G34750
AT5G62840
AT1G09623
AT3G05945
AT5G47060
ENSRNA049758116-T1
AT5G21030
AT1G04230
AT1G56540
AT4G13495
AT2G19830
AT2G31955
AT4G39530
AT1G12090
AT2G21070
AT4G00180
AT3G60130
AT5G63085
AT1G65370
AT1G19025
AT3G51770
AT2G05790
AT4G25770
AT5G66390
AT3G43740
AT1G09840
AT3G57580
AT1G02640
AT1G78200
AT1G50040
AT4G02195
AT3G23400
AT5G25280
at2g03445
AT5G64320
AT1G36310
AT1G62800
AT4G12720
AT1G08213
ENSRNA049492366-T1
AT4G05530
AT3G01860
AT2G43990
AT4G39900
AT4G23050
AT4G20290
AT5G47660
AT5G44790
AT5G56340
AT5G23280
AT4G38710
AT1G17270
AT1G05370
AT2G24580
AT3G27660
AT3G51550
AT5G63620
AT2G31010
AT4G39260
AT5G42570
AT1G33050
AT3G02130
AT1G78150
AT5G05720
AT1G21080
AT5G58610
AT3G15730
AT4G19410
AT1G01470
AT1G79700
AT5G20730
AT2G12550
AT5G54970
AT5G56250
AT2G14825
AT3G04060
AT4G17070
AT3G21320
AT3G17460
ENSRNA049492715-T1
AT2G37540
AT3G06483
AT5G06205
AT3G10800
AT2G04740
AT5G58730
at1g76062
AT5G11790
AT4G01550
AT5G11840
AT2G47140
AT5G30495
AT5G12840
AT1G08010
AT2G25310
AT5G19050
AT2G16700
AT1G70940
AT5G49530
AT1G80820
AT2G30040
AT2G43850
AT1G67360
AT1G27730
AT3G06120
AT3G29360
AT5G54810
AT3G50700
AT2G27710
AT5G24170
AT5G22050
AT4G26000
AT1G17147
AT3G16520
AT5G11630
AT4G10140
AT5G39785
AT1G09420
AT5G26040
AT3G18040
AT5G51195
AT3G11440
AT1G14315
AT4G17760
AT3G10760
AT1G52710
ENSRNA049495656-T1
AT4G16563
AT3G54950
AT1G05577
AT3G12040
AT1G66830
AT4G16748
AT5G49720
AT1G74920
AT4G37760
AT5G15175
AT5G01305
AT3G60630
AT5G01170
AT4G39830
AT1G54710
AT5G54940
AT3G28900
AT4G25540
AT4G24150
AT5G11090
AT5G16340
AT4G13330
AT3G61340
AT1G23280
AT2G36300
AT2G40210
AT1G78630
AT3G52290
AT3G26990
AT3G01165
AT2G32795
AT5G51020
AT3G29320
AT2G40330
AT5G05690
AT3G19150
AT2G42450
AT2G21170
AT1G19230
AT1G14520
AT4G10740
AT3G18830
AT3G16720
AT5G39320
AT3G21290
AT5G07290
AT5G57050
AT1G07200
AT3G02050
AT5G05110
AT2G17320
AT5G65840
AT5G20170
AT1G62850
AT5G04540
AT1G66170
AT5G17490
AT1G20090
AT2G18740
AT4G31500
AT4G38660
AT3G57930
AT5G05740
AT2G33550
AT5G25450
AT1G20570
AT5G61560
AT2G10950
AT5G38590
AT4G23220
AT5G11000
AT5G66560
AT1G63500
AT2G25625
AT5G11700
AT4G25900
AT1G78890
AT1G08410
AT1G21390
AT2G32800
AT1G14330
AT2G22880
AT5G39570
AT5G48560
AT2G18915
AT5G39024
AT2G15570
AT5G03900
AT4G25450
AT3G04355
AT1G78000
AT2G28720
AT1G26570
AT3G21790
AT3G27010
AT5G26110
AT1G72010
AT1G02880
AT3G54625
AT5G36290
AT5G08520
AT1G35340
AT4G02750
AT4G37460
AT5G07990
AT5G65310
AT3G61990
AT5G47229
AT3G48115
AT4G08810
AT1G06323
AT1G08645
AT3G50690
AT1G67060
AT5G54310
AT4G09335
AT5G30490
AT1G12500
AT1G05740
AT1G66240
AT5G44080
AT3G58730
AT1G76990
AT4G35600
AT4G30470
AT2G20825
AT1G64090
AT5G03140
AT5G19290
AT1G63720
AT1G04657
AT1G64180
AT1G19300
AT2G22475
AT3G13450
AT3G29075
AT1G08360
AT4G38670
AT3G07560
AT3G27990
AT3G52565
AT3G28450
AT3G02330
AT1G71040
AT4G03635
AT1G01830
AT1G09940
AT1G01940
AT1G72880
AT5G47810
[truncated: 17,428 more rows]
