# Supplementary material for: Polycomb-dependent differential chromatin compartmentalization determines gene coregulation in Arabidopsis
Source: HighWire-hosted journal article supplement (doi:10.1101/gr.273771.120), 2021-06-03
Supplement: Supplemental_Table_S24.xlsx [file Supplemental_Table_S24.xlsx]

## Sheet: S24
Supplementary Table S24: clf_vs_Col-0_C-Hi-C_for_Figure5G
Gene1	Gene2	PeakID(1)	chr(1)	start(1)	end(1)	strand(1)	Total Reads(1)	PeakID(2)	chr(2)	start(2)	end(2)	strand(2)	Total Reads(2)	Distance	Interaction Reads	Expected Reads	Z-score	LogP	FDR(Benjamini, based on 2.84e+10 total tests)	Bg Interaction Reads	Bg Expected Reads	Bg Z-score	Bg LogP	Bg Total Reads Peak1	Bg Total Reads Peak2	Probe_Gene1	Probe_Gene2	Hypo_H3K27me3_Gene1	Hypo_H3K27me3_Gene2	clf_H3K9marked_Gene1	clf_H3K9marked_Gene2
AT1G65350	AT1G65342	1-24276500	1	24276532	24277032	+	1782	1-24271000	1	24271113	24271613	+	161	5419	26	0.070444	2600	-64.2057	0	3	0.070444	300	-2.53371	943	99	Yes	NA	Yes	Yes	NA	NA
AT2G26170	AT2G26160	2-11142500	2	11142490	11142990	+	66	2-11139000	2	11139060	11139560	+	932	3430	15	0.070444	1500	-30.35	0	1	0.070444	100	-0.452021	44	812	NA	Yes	NA	NA	Yes	NA
AT1G29630	AT1G29590	1-10350500	1	10350517	10351017	+	85	1-10340500	1	10340509	10341009	+	1867	10008	15	0.070444	1500	-29.9866	0	1	0.070444	100	-0.453803	60	1647	NA	Yes	NA	NA	Yes	NA
AT2G32640	AT2G32610	2-13848000	2	13847940	13848440	+	111	2-13836500	2	13836547	13837047	+	2058	11393	15	0.070444	1500	-29.7022	0	1	0.070444	100	-0.45418	65	1662	NA	Yes	NA	NA	NA	Yes
AT1G18910	AT1G18890	1-6535500	1	6535543	6536043	+	70	1-6525000	1	6525063	6525563	+	1702	10480	14	0.070444	1400	-27.3343	1e-06	1	0.070444	100	-0.445871	23	1638	NA	Yes	NA	NA	Yes	NA
AT1G15215	AT1G15210	1-5239000	1	5238981	5239481	+	2049	1-5233500	1	5233448	5233948	+	74	5533	14	0.070444	1400	-27.2636	1e-06	1	0.070444	100	-0.451161	1468	39	Yes	NA	NA	NA	Yes	Yes
AT1G01695	AT1G01690	1-253000	1	252955	253455	+	207	1-250000	1	249924	250424	+	1484	3031	60	0.070444	6000	-198.841	0	24	0.070444	2400	-57.6312	143	1169	NA	Yes	NA	NA	NA	NA
AT1G54940	AT1G54930	1-20482000	1	20482052	20482552	+	1268	1-20478500	1	20478514	20479014	+	83	3538	20	0.070444	2000	-45.5551	0	3	0.070444	300	-2.54956	906	43	Yes	NA	Yes	Yes	NA	NA
AT2G42810	AT2G42800	2-17813500	2	17813506	17814006	+	165	2-17809000	2	17809029	17809529	+	1612	4477	30	0.070444	3000	-78.2613	0	7	0.070444	700	-9.56204	94	1404	NA	Yes	NA	NA	Yes	Yes
AT1G65350	AT1G65340	1-24276500	1	24276519	24277019	+	1782	1-24268500	1	24268472	24268972	+	177	8047	21	0.070444	2100	-47.4581	0	3	0.070444	300	-2.53155	943	121	Yes	NA	Yes	Yes	NA	NA
AT1G62990	AT1G62980	1-23337500	1	23337430	23337930	+	1268	1-23333000	1	23332993	23333493	+	257	4437	26	0.070444	2600	-63.437	0	5	0.070444	500	-5.63441	1162	263	Yes	NA	Yes	NA	Yes	NA
AT2G04940	AT2G04920	2-1738000	2	1737970	1738470	+	40	2-1726000	2	1726035	1726535	+	1835	11935	13	0.070444	1300	-25.3776	6e-06	1	0.070444	100	-0.44818	28	1440	NA	Yes	NA	Yes	Yes	NA
AT1G32030	AT1G32010	1-11514500	1	11514408	11514908	+	891	1-11511500	1	11511498	11511998	+	78	2910	13	0.070444	1300	-24.3872	1.5e-05	1	0.070444	100	-0.448546	831	29	Yes	NA	Yes	NA	NA	NA
AT2G28250	AT2G28240	2-12043500	2	12043584	12044084	+	1567	2-12040000	2	12039938	12040438	+	138	3646	33	0.070444	3300	-89.9631	0	9	0.070444	900	-13.9916	1288	100	Yes	NA	NA	NA	NA	Yes
AT1G21230	AT1G21200	1-7430500	1	7430583	7431083	+	1831	1-7422500	1	7422498	7422998	+	114	8085	17	0.070444	1700	-35.5661	0	2	0.070444	200	-1.33091	1008	77	Yes	NA	NA	NA	NA	Yes
AT2G40350	AT2G40320	2-16852000	2	16851907	16852407	+	179	2-16841000	2	16840911	16841411	+	1946	10996	20	0.070444	2000	-44.2853	0	3	0.070444	300	-2.5318	118	1509	NA	Yes	NA	NA	NA	Yes
AT1G02260	AT1G02230	1-441000	1	441000	441500	+	102	1-435500	1	435614	436114	+	1527	5386	13	0.070444	1300	-24.1624	1.8e-05	1	0.070444	100	-0.453961	62	1373	NA	Yes	NA	NA	Yes	NA
AT1G01660	AT1G01650	1-241500	1	241492	241992	+	1038	1-235500	1	235485	235985	+	96	6007	13	0.070444	1300	-24.2074	1.7e-05	1	0.070444	100	-0.45418	827	65	Yes	NA	NA	NA	NA	Yes
AT1G35330	AT1G35310	1-12966000	1	12965902	12966402	+	103	1-12956000	1	12956086	12956586	+	1169	9816	13	0.070444	1300	-24.1554	1.8e-05	1	0.070444	100	-0.454931	78	836	NA	Yes	Yes	Yes	Yes	NA
AT2G03505	AT2G03500	2-1064500	2	1064428	1064928	+	1703	2-1062000	2	1062015	1062515	+	113	2413	30	0.070444	3000	-79.6084	0	8	0.070444	800	-11.7431	1394	87	Yes	NA	NA	Yes	NA	NA
AT1G21230	AT1G21210	1-7430500	1	7430580	7431080	+	1831	1-7425500	1	7425405	7425905	+	106	5175	19	0.070444	1900	-41.8385	0	3	0.070444	300	-2.5409	1008	62	Yes	NA	NA	NA	NA	NA
AT3G16330	AT3G16320	3-5535000	3	5535150	5535650	+	1377	3-5531000	3	5531009	5531509	+	91	4141	21	0.070444	2100	-48.6213	0	4	0.070444	400	-4.01128	1055	70	Yes	NA	NA	NA	Yes	Yes
AT2G14692	AT2G14690	2-6287500	2	6287634	6288134	+	993	2-6285500	2	6285569	6286069	+	101	2065	27	0.070444	2700	-69.0938	0	7	0.070444	700	-9.61241	847	73	Yes	NA	Yes	NA	NA	NA
AT1G19700	AT1G19680	1-6810000	1	6810043	6810543	+	99	1-6806000	1	6806002	6806502	+	2130	4041	30	0.070444	3000	-80.2457	0	9	0.070444	900	-14.2384	56	1806	NA	Yes	NA	NA	Yes	Yes
AT1G48740	AT1G48730	1-18024500	1	18024685	18025185	+	1072	1-18020000	1	18019956	18020456	+	147	4729	23	0.070444	2300	-54.2334	0	5	0.070444	500	-5.68614	871	85	Yes	NA	NA	Yes	NA	NA
AT2G30690	AT2G30660	2-13076500	2	13076497	13076997	+	84	2-13061000	2	13060992	13061492	+	1916	15505	12	0.070444	1200	-21.6051	0.000206	1	0.070444	100	-0.45153	41	1542	NA	Yes	Yes	Yes	NA	Yes
AT2G24030	AT2G24000	2-10220500	2	10220541	10221041	+	82	2-10211000	2	10210928	10211428	+	930	9613	12	0.070444	1200	-21.6231	0.000203	1	0.070444	100	-0.452169	45	868	NA	Yes	NA	Yes	Yes	NA
AT1G25350	AT1G25330	1-8890500	1	8890528	8891028	+	70	1-8881500	1	8881548	8882048	+	1458	8980	12	0.070444	1200	-21.7545	0.00018	1	0.070444	100	-0.453454	56	1169	NA	Yes	NA	Yes	Yes	NA
AT1G20160	AT1G20135	1-6992500	1	6992555	6993055	+	142	1-6985000	1	6984901	6985401	+	748	7654	12	0.070444	1200	-21.3107	0.000262	1	0.070444	100	-0.455158	83	656	NA	Yes	NA	Yes	NA	NA
AT2G31500	AT2G31480	2-13415000	2	13414936	13415436	+	177	2-13410500	2	13410451	13410951	+	1788	4485	27	0.070444	2700	-67.4667	0	7	0.070444	700	-9.52251	122	1391	NA	Yes	NA	Yes	NA	NA
AT1G69660	AT1G69630	1-26200000	1	26199923	26200423	+	1815	1-26192000	1	26192033	26192533	+	130	7890	12	0.070444	1200	-21.3493	0.000255	1	0.070444	100	-0.455786	1333	101	Yes	NA	Yes	NA	NA	NA
AT1G70830	AT1G70790	1-26710500	1	26710492	26710992	+	1497	1-26701500	1	26701547	26702047	+	181	8945	12	0.070444	1200	-21.2216	0.000282	1	0.070444	100	-0.455999	1353	109	Yes	NA	Yes	NA	NA	Yes
AT1G32170	AT1G32150	1-11577000	1	11577028	11577528	+	142	1-11566500	1	11566539	11567039	+	568	10489	12	0.070444	1200	-21.3107	0.000262	1	0.070444	100	-0.456304	123	519	NA	Yes	Yes	NA	Yes	Yes
AT1G64235	AT1G64210	1-23836500	1	23836436	23836936	+	1186	1-23831500	1	23831481	23831981	+	169	4955	18	0.070444	1800	-38.1816	0	3	0.070444	300	-2.53491	1046	90	Yes	NA	NA	NA	NA	Yes
AT1G21560	AT1G21550	1-7556000	1	7556031	7556531	+	125	1-7554000	1	7553861	7554361	+	487	2170	12	0.070444	1200	-21.3676	0.000251	1	0.070444	100	-0.456593	140	392	NA	Yes	NA	Yes	Yes	Yes
AT2G05370	AT2G05360	2-1961000	2	1960946	1961446	+	1321	2-1958000	2	1958049	1958549	+	85	2897	38	0.070444	3800	-113.367	0	15	0.070444	1500	-30.6522	1200	56	Yes	NA	NA	NA	NA	NA
AT2G10450	AT2G10440	2-4020500	2	4020513	4021013	+	1117	2-4014500	2	4014442	4014942	+	37	6071	11	0.070444	1100	-19.8042	0.001114	1	0.070444	100	-0.443924	841	20	Yes	NA	NA	NA	NA	NA
AT3G03910	AT3G03900	3-1007000	3	1007013	1007513	+	737	3-1003000	3	1002951	1003451	+	102	4062	15	0.070444	1500	-29.7833	0	2	0.070444	200	-1.33091	744	77	Yes	NA	NA	NA	NA	Yes
AT2G01210	AT2G01180	2-121500	2	121399	121899	+	1471	2-107500	2	107554	108054	+	94	13845	15	0.070444	1500	-29.8692	0	2	0.070444	200	-1.33091	1313	78	Yes	NA	NA	NA	Yes	Yes
AT2G42850	AT2G42840	2-17831500	2	17831506	17832006	+	1135	2-17826000	2	17826018	17826518	+	166	5488	15	0.070444	1500	-29.4048	0	2	0.070444	200	-1.3309	1080	113	Yes	NA	NA	Yes	NA	NA
AT1G72800	AT1G72760	1-27397500	1	27397396	27397896	+	1541	1-27387000	1	27386939	27387439	+	59	10457	11	0.070444	1100	-19.2449	0.001936	1	0.070444	100	-0.445871	1165	23	Yes	NA	NA	NA	Yes	NA
AT2G40330	AT2G40320	2-16845500	2	16845527	16846027	+	152	2-16841000	2	16840903	16841403	+	1946	4624	15	0.070444	1500	-29.4593	0	2	0.070444	200	-1.3309	123	1509	NA	Yes	NA	NA	Yes	Yes
AT1G49220	AT1G49170	1-18206000	1	18206134	18206634	+	2125	1-18183500	1	18183562	18184062	+	223	22572	15	0.070444	1500	-29.2554	0	2	0.070444	200	-1.3309	1576	190	Yes	NA	NA	NA	NA	Yes
AT2G02320	AT2G02290	2-611500	2	611448	611948	+	44	2-604500	2	604370	604870	+	1357	7078	14	0.070444	1400	-28.1531	0	2	0.070444	200	-1.33101	32	1112	NA	Yes	Yes	Yes	NA	NA
AT1G49920	AT1G49910	1-18483000	1	18483010	18483510	+	219	1-18479500	1	18479583	18480083	+	789	3427	20	0.070444	2000	-44.0966	0	4	0.070444	400	-3.98474	157	614	NA	Yes	NA	NA	NA	NA
AT1G17010	AT1G17000	1-5818000	1	5818035	5818535	+	88	1-5813000	1	5813114	5813614	+	1650	4921	17	0.070444	1700	-35.9225	0	3	0.070444	300	-2.54121	61	1303	NA	Yes	NA	Yes	NA	NA
AT2G02680	AT2G02660	2-747000	2	746990	747490	+	1314	2-739500	2	739545	740045	+	55	7445	16	0.070444	1600	-33.7659	0	3	0.070444	300	-2.56078	949	31	Yes	NA	Yes	NA	Yes	NA
AT1G32030	AT1G32000	1-11515000	1	11515089	11515589	+	1185	1-11508500	1	11508439	11508939	+	83	6650	14	0.070444	1400	-27.1313	1e-06	2	0.070444	200	-1.33097	841	40	Yes	NA	Yes	NA	NA	NA
AT1G44940	AT1G44920	1-16994000	1	16994056	16994556	+	1227	1-16984500	1	16984573	16985073	+	57	9483	11	0.070444	1100	-19.2764	0.001878	1	0.070444	100	-0.451702	818	42	Yes	NA	NA	NA	NA	Yes
AT1G18640	AT1G18620	1-6417500	1	6417505	6418005	+	62	1-6410000	1	6409998	6410498	+	1169	7507	11	0.070444	1100	-19.2018	0.002017	1	0.070444	100	-0.451865	43	1200	NA	Yes	NA	NA	Yes	Yes
AT1G64790	AT1G64780	1-24078500	1	24078518	24079018	+	90	1-24062000	1	24061941	24062441	+	2054	16577	11	0.070444	1100	-18.9451	0.002533	1	0.070444	100	-0.452312	46	1653	NA	Yes	NA	NA	Yes	Yes
AT1G42540	AT1G42525	1-15973500	1	15973553	15974053	+	979	1-15967500	1	15967553	15968053	+	72	6000	16	0.070444	1600	-33.2088	0	3	0.070444	300	-2.57521	960	23	Yes	NA	NA	NA	Yes	NA
AT1G05460	AT1G05400	1-1603500	1	1603476	1603976	+	75	1-1584500	1	1584490	1584990	+	2036	18986	11	0.070444	1100	-19.0573	0.002305	1	0.070444	100	-0.452939	51	1835	NA	Yes	NA	NA	Yes	Yes
AT1G52030	AT1G51990	1-19346500	1	19346452	19346952	+	105	1-19331000	1	19330909	19331409	+	1689	15543	11	0.070444	1100	-18.8663	0.002695	1	0.070444	100	-0.452939	51	1343	NA	Yes	NA	Yes	NA	NA
AT2G21770	AT2G21730	2-9287000	2	9287009	9287509	+	74	2-9281000	2	9280844	9281344	+	969	6165	14	0.070444	1400	-27.2636	1e-06	2	0.070444	200	-1.33095	46	646	NA	Yes	NA	Yes	NA	NA
AT2G28340	AT2G28320	2-12104000	2	12103916	12104416	+	1666	2-12096000	2	12095961	12096461	+	76	7955	14	0.070444	1400	-27.2313	1e-06	2	0.070444	200	-1.33095	1293	48	Yes	NA	Yes	NA	NA	Yes
AT3G07980	AT3G07960	3-2545000	3	2544991	2545491	+	169	3-2535500	3	2535594	2536094	+	2109	9397	29	0.070444	2900	-74.6099	0	9	0.070444	900	-13.9411	120	1750	NA	Yes	NA	NA	Yes	Yes
AT1G60040	AT1G60030	1-22119500	1	22119581	22120081	+	1025	1-22115000	1	22114988	22115488	+	117	4593	19	0.070444	1900	-41.6833	0	4	0.070444	400	-4.00993	887	72	Yes	NA	Yes	NA	NA	NA
AT1G55580	AT1G55570	1-20763500	1	20763520	20764020	+	58	1-20758500	1	20758564	20759064	+	1801	4956	11	0.070444	1100	-19.2603	0.001907	1	0.070444	100	-0.453803	60	1250	NA	Yes	NA	Yes	Yes	NA
AT1G19220	AT1G19190	1-6628500	1	6628542	6629042	+	95	1-6624000	1	6623991	6624491	+	1120	4551	11	0.070444	1100	-18.9159	0.002592	1	0.070444	100	-0.454441	69	1046	NA	Yes	NA	NA	Yes	Yes
AT1G10390	AT1G10380	1-3407500	1	3407440	3407940	+	124	1-3402000	1	3401829	3402329	+	434	5611	11	0.070444	1100	-18.7948	0.002844	1	0.070444	100	-0.455432	90	423	NA	Yes	NA	NA	NA	NA
AT1G65890	AT1G65880	1-24513500	1	24513508	24514008	+	1675	1-24509000	1	24508944	24509444	+	137	4564	21	0.070444	2100	-47.8061	0	5	0.070444	500	-5.69205	1235	79	Yes	NA	Yes	Yes	NA	NA
AT1G02530	AT1G02520	1-531000	1	531000	531500	+	149	1-524500	1	524420	524920	+	408	6580	11	0.070444	1100	-18.7294	0.002987	1	0.070444	100	-0.455603	95	328	NA	Yes	NA	NA	NA	Yes
AT1G67630	AT1G67620	1-25345000	1	25344949	25345449	+	115	1-25341500	1	25341304	25341804	+	1044	3645	11	0.070444	1100	-18.8256	0.002779	1	0.070444	100	-0.455815	102	862	NA	Yes	NA	NA	NA	Yes
AT2G25570	AT2G25540	2-10885500	2	10885502	10886002	+	173	2-10871500	2	10871594	10872094	+	1514	13908	17	0.070444	1700	-35.1703	0	3	0.070444	300	-2.52857	175	1273	NA	Yes	NA	Yes	Yes	NA
AT1G26480	AT1G26460	1-9157000	1	9157009	9157509	+	764	1-9152000	1	9151899	9152399	+	89	5110	11	0.070444	1100	-18.9513	0.00252	1	0.070444	100	-0.455949	544	107	Yes	NA	NA	NA	Yes	Yes
AT1G11410	AT1G11400	1-3842000	1	3841833	3842333	+	576	1-3839500	1	3839509	3840009	+	123	2324	11	0.070444	1100	-18.798	0.002837	1	0.070444	100	-0.456203	406	118	Yes	NA	NA	NA	NA	Yes
AT2G32860	AT2G32850	2-13940500	2	13940318	13940818	+	1301	2-13936000	2	13935927	13936427	+	137	4391	11	0.070444	1100	-18.7577	0.002925	1	0.070444	100	-0.456203	1023	118	Yes	NA	Yes	Yes	NA	Yes
AT1G25300	AT1G25275	1-8871500	1	8871566	8872066	+	133	1-8860500	1	8860601	8861101	+	1300	10965	11	0.070444	1100	-18.7684	0.002901	1	0.070444	100	-0.456285	122	1512	NA	Yes	NA	NA	NA	Yes
AT2G05370	AT2G05350	2-1961000	2	1960907	1961407	+	1321	2-1950000	2	1950076	1950576	+	50	10831	10	0.070444	1000	-16.7992	0.019384	1	0.070444	100	-0.431543	1200	11	Yes	NA	NA	NA	NA	NA
AT1G10385	AT1G10340	1-3404000	1	3403903	3404403	+	1276	1-3391500	1	3391566	3392066	+	173	12337	19	0.070444	1900	-41.2126	0	4	0.070444	400	-3.99434	857	108	Yes	NA	NA	NA	NA	Yes
AT2G03020	AT2G03010	2-883500	2	883416	883916	+	85	2-879500	2	879375	879875	+	801	4041	14	0.070444	1400	-27.106	1e-06	2	0.070444	200	-1.33091	80	642	NA	Yes	NA	NA	NA	Yes
AT3G06790	AT3G06760	3-2145000	3	2144981	2145481	+	748	3-2133500	3	2133427	2133927	+	1150	11554	11	0.070444	1100	-18.477	0.003663	1	0.070444	100	-0.458295	765	1308	NA	Yes	NA	NA	Yes	Yes
AT1G29020	AT1G29010	1-10122500	1	10122403	10122903	+	722	1-10118500	1	10118499	10118999	+	127	3904	14	0.070444	1400	-26.7665	1e-06	2	0.070444	200	-1.3309	602	103	Yes	NA	NA	Yes	NA	NA
AT1G60270	AT1G60250	1-22223500	1	22223547	22224047	+	1743	1-22217500	1	22217482	22217982	+	100	6065	24	0.070444	2400	-58.5233	0	7	0.070444	700	-9.64875	1643	63	Yes	NA	NA	NA	Yes	NA
AT3G13830	AT3G13820	3-4554000	3	4554010	4554510	+	144	3-4549500	3	4549574	4550074	+	1858	4436	36	0.070444	3600	-101.238	0	14	0.070444	1400	-26.9247	103	1312	NA	Yes	NA	NA	NA	NA
AT2G21750	AT2G21730	2-9283500	2	9283335	9283835	+	64	2-9280500	2	9280560	9281060	+	718	2775	13	0.070444	1300	-24.603	1.2e-05	2	0.070444	200	-1.33107	26	506	NA	Yes	NA	Yes	NA	NA
AT1G49250	AT1G49240	1-18221000	1	18220972	18221472	+	1367	1-18217000	1	18217065	18217565	+	269	3907	21	0.070444	2100	-47.0622	0	5	0.070444	500	-5.65143	911	155	Yes	NA	Yes	NA	NA	Yes
AT3G03920	AT3G03910	3-1009500	3	1009412	1009912	+	63	3-1007500	3	1007601	1008101	+	765	1811	13	0.070444	1300	-24.6224	1.2e-05	2	0.070444	200	-1.33103	30	542	NA	Yes	NA	NA	NA	NA
AT1G09770	AT1G09750	1-3163500	1	3163602	3164102	+	43	1-3157500	1	3157390	3157890	+	1179	6212	10	0.070444	1000	-16.9408	0.016861	1	0.070444	100	-0.444636	21	1157	NA	Yes	NA	NA	Yes	Yes
AT2G25360	AT2G25350	2-10805000	2	10805000	10805500	+	1932	2-10800000	2	10799990	10800490	+	198	5010	28	0.070444	2800	-70.7245	0	9	0.070444	900	-13.9292	1462	126	Yes	NA	Yes	NA	NA	Yes
AT3G01175	AT3G01160	3-60500	3	60431	60931	+	1755	3-55500	3	55534	56034	+	116	4897	16	0.070444	1600	-32.5693	0	3	0.070444	300	-2.53821	1517	72	Yes	NA	NA	NA	NA	Yes
AT1G64600	AT1G64590	1-23997000	1	23997021	23997521	+	115	1-23993500	1	23993621	23994121	+	1799	3400	18	0.070444	1800	-38.6005	0	4	0.070444	400	-4.01941	60	1397	NA	Yes	NA	Yes	NA	Yes
AT2G03560	AT2G03520	2-1079500	2	1079424	1079924	+	1150	2-1070000	2	1070011	1070511	+	132	9413	16	0.070444	1600	-32.4476	0	3	0.070444	300	-2.53602	1228	83	Yes	NA	NA	NA	NA	Yes
AT2G34300	AT2G34290	2-14474000	2	14473952	14474452	+	130	2-14473000	2	14472883	14473383	+	346	1069	16	0.070444	1600	-32.4611	0	3	0.070444	300	-2.53602	83	319	NA	NA	NA	NA	Yes	NA
AT1G30920	AT1G30900	1-11004500	1	11004440	11004940	+	1914	1-11000000	1	11000024	11000524	+	177	4416	33	0.070444	3300	-89.0305	0	12	0.070444	1200	-21.2529	1612	165	Yes	NA	Yes	NA	Yes	Yes
AT1G14048	AT1G14030	1-4815500	1	4815556	4816056	+	116	1-4806500	1	4806449	4806949	+	1645	9107	16	0.070444	1600	-32.5693	0	3	0.070444	300	-2.53303	105	1333	NA	Yes	NA	NA	NA	Yes
AT3G11370	AT3G11350	3-3562000	3	3561895	3562395	+	1657	3-3558500	3	3558536	3559036	+	288	3359	41	0.070444	4100	-117.864	0	17	0.070444	1700	-35.042	1332	209	Yes	NA	NA	NA	NA	NA
AT1G06070	AT1G06030	1-1837500	1	1837420	1837920	+	105	1-1827500	1	1827408	1827908	+	1941	10012	16	0.070444	1600	-32.6757	0	3	0.070444	300	-2.53042	137	1733	NA	Yes	NA	NA	Yes	NA
AT3G17740	AT3G17720	3-6069500	3	6069477	6069977	+	141	3-6063000	3	6063057	6063557	+	2089	6420	24	0.070444	2400	-57.6598	0	7	0.070444	700	-9.53302	113	1837	NA	Yes	NA	NA	NA	NA
AT1G64110	AT1G64100	1-23799500	1	23799533	23800033	+	142	1-23792500	1	23792408	23792908	+	1850	7125	20	0.070444	2000	-44.5597	0	5	0.070444	500	-5.68614	85	1398	NA	Yes	NA	NA	NA	NA
AT2G15350	AT2G15327	2-6689000	2	6689041	6689541	+	1883	2-6672500	2	6672503	6673003	+	48	16538	10	0.070444	1000	-16.835	0.018715	1	0.070444	100	-0.449504	1440	32	Yes	NA	Yes	Yes	NA	NA
AT1G80850	AT1G80810	1-30386000	1	30386003	30386503	+	88	1-30365500	1	30365547	30366047	+	2079	20456	10	0.070444	1000	-16.4424	0.026706	1	0.070444	100	-0.450531	36	1734	NA	Yes	NA	NA	Yes	Yes
AT1G73360	AT1G73340	1-27580500	1	27580497	27580997	+	98	1-27574000	1	27574029	27574529	+	1608	6468	13	0.070444	1300	-24.1918	1.7e-05	2	0.070444	200	-1.33094	49	1119	NA	Yes	NA	NA	Yes	Yes
AT3G10190	AT3G10180	3-3155000	3	3155165	3155665	+	848	3-3151500	3	3151550	3152050	+	69	3615	10	0.070444	1000	-16.5686	0.024073	1	0.070444	100	-0.451702	842	42	Yes	NA	NA	NA	Yes	Yes
AT1G18280	AT1G18270	1-6294000	1	6294086	6294586	+	736	1-6285500	1	6285479	6285979	+	70	8607	10	0.070444	1000	-16.5602	0.024249	1	0.070444	100	-0.452021	711	44	Yes	NA	NA	NA	Yes	Yes
AT2G30660	AT2G30630	2-13061000	2	13060950	13061450	+	1916	2-13048000	2	13048025	13048525	+	84	12925	10	0.070444	1000	-16.464	0.026264	1	0.070444	100	-0.452021	1542	44	Yes	NA	Yes	NA	Yes	Yes
AT1G22030	AT1G22015	1-7760500	1	7760454	7760954	+	50	1-7753000	1	7753012	7753512	+	1679	7442	10	0.070444	1000	-16.7992	0.019384	1	0.070444	100	-0.452169	45	1344	NA	Yes	NA	Yes	Yes	NA
AT1G14610	AT1G14590	1-5011000	1	5011104	5011604	+	53	1-4999500	1	4999529	5000029	+	1364	11575	10	0.070444	1000	-16.7509	0.020317	1	0.070444	100	-0.452312	46	1399	NA	Yes	NA	Yes	Yes	Yes
AT2G32795	AT2G32770	2-13910500	2	13910404	13910904	+	1439	2-13896500	2	13896457	13896957	+	81	13947	10	0.070444	1000	-16.4816	0.025894	1	0.070444	100	-0.452578	1626	48	Yes	NA	NA	NA	Yes	Yes
AT2G17420	AT2G17380	2-7565500	2	7565398	7565898	+	1694	2-7555000	2	7554973	7555473	+	62	10425	10	0.070444	1000	-16.636	0.022651	1	0.070444	100	-0.452939	1366	51	Yes	NA	NA	NA	Yes	Yes
AT1G35320	AT1G35310	1-12959500	1	12959605	12960105	+	130	1-12956500	1	12956477	12956977	+	1990	3128	33	0.070444	3300	-90.2311	0	13	0.070444	1300	-24.1995	97	1579	NA	Yes	Yes	Yes	Yes	NA
AT1G31740	AT1G31710	1-11366500	1	11366572	11367072	+	128	1-11349500	1	11349542	11350042	+	1515	17030	10	0.070444	1000	-16.303	0.029437	1	0.070444	100	-0.453358	55	1186	NA	Yes	NA	Yes	NA	Yes
AT2G30460	AT2G30432	2-12978000	2	12977991	12978491	+	73	2-12968500	2	12968439	12968939	+	1164	9552	13	0.070444	1300	-24.454	1.4e-05	2	0.070444	200	-1.33092	69	1133	NA	Yes	NA	NA	Yes	NA
AT1G24420	AT1G24400	1-8657000	1	8656894	8657394	+	1062	1-8653000	1	8652958	8653458	+	159	3936	20	0.070444	2000	-44.4169	0	5	0.070444	500	-5.65691	844	137	Yes	NA	NA	NA	NA	NA
AT2G43700	AT2G43680	2-18117500	2	18117465	18117965	+	119	2-18109000	2	18108971	18109471	+	1698	8494	10	0.070444	1000	-16.3259	0.028981	1	0.070444	100	-0.453883	61	1854	NA	Yes	NA	NA	Yes	Yes
AT1G68640	AT1G68600	1-25770500	1	25770522	25771022	+	89	1-25760000	1	25759982	25760482	+	1106	10540	10	0.070444	1000	-16.4373	0.026804	1	0.070444	100	-0.45418	65	1066	NA	Yes	NA	NA	NA	NA
AT2G24460	AT2G24440	2-10395000	2	10394882	10395382	+	854	2-10392000	2	10392079	10392579	+	263	2803	18	0.070444	1800	-37.8736	0	4	0.070444	400	-3.98057	670	196	Yes	NA	Yes	Yes	NA	Yes
AT1G22403	AT1G22340	1-7909500	1	7909504	7910004	+	1177	1-7891000	1	7890940	7891440	+	118	18564	10	0.070444	1000	-16.3287	0.028925	1	0.070444	100	-0.454781	1104	75	Yes	NA	NA	NA	Yes	Yes
AT1G10700	AT1G10682	1-3555500	1	3555384	3555884	+	83	1-3545500	1	3545350	3545850	+	733	10034	10	0.070444	1000	-16.4697	0.026146	1	0.070444	100	-0.454931	78	786	NA	Yes	NA	NA	Yes	Yes
AT2G34240	AT2G34210	2-14459500	2	14459470	14459970	+	121	2-14446500	2	14446516	14447016	+	1940	12954	10	0.070444	1000	-16.3205	0.029089	1	0.070444	100	-0.454931	78	1616	NA	Yes	NA	NA	Yes	NA
AT2G03830	AT2G03820	2-1172000	2	1172081	1172581	+	488	2-1165000	2	1164995	1165495	+	122	7086	10	0.070444	1000	-16.3179	0.029138	1	0.070444	100	-0.455071	527	81	Yes	NA	Yes	NA	NA	Yes
AT3G11130	AT3G11120	3-3491000	3	3490986	3491486	+	80	3-3481500	3	3481362	3481862	+	1413	9624	10	0.070444	1000	-16.4878	0.025764	1	0.070444	100	-0.45532	87	1703	NA	Yes	NA	NA	Yes	Yes
AT1G77930	AT1G77890	1-29301500	1	29301573	29302073	+	1912	1-29295000	1	29295133	29295633	+	89	6440	10	0.070444	1000	-16.4373	0.026804	1	0.070444	100	-0.455358	1683	88	Yes	NA	NA	NA	Yes	Yes
AT1G62085	AT1G62050	1-22950000	1	22949876	22950376	+	1547	1-22937500	1	22937403	22937903	+	107	12473	13	0.070444	1300	-24.1288	1.8e-05	2	0.070444	200	-1.33091	1620	94	Yes	NA	NA	NA	Yes	Yes
AT1G65660	AT1G65640	1-24419000	1	24418951	24419451	+	140	1-24412500	1	24412527	24413027	+	978	6424	10	0.070444	1000	-16.2772	0.029947	1	0.070444	100	-0.455537	93	796	NA	Yes	NA	Yes	Yes	NA
AT1G70900	AT1G70890	1-26732500	1	26732433	26732933	+	127	1-26726000	1	26726046	26726546	+	1651	6387	13	0.070444	1300	-24.0223	2e-05	2	0.070444	200	-1.33091	100	1490	NA	Yes	NA	NA	Yes	Yes
AT3G01330	AT3G01326	3-125500	3	125623	126123	+	135	3-115500	3	115378	115878	+	824	10245	10	0.070444	1000	-16.2874	0.029743	1	0.070444	100	-0.45587	104	692	NA	Yes	NA	Yes	NA	NA
AT1G59640	AT1G59620	1-21910000	1	21909952	21910452	+	163	1-21903500	1	21903642	21904142	+	823	6310	10	0.070444	1000	-16.2385	0.030752	1	0.070444	100	-0.455897	105	781	NA	Yes	NA	NA	Yes	Yes
AT1G69660	AT1G69640	1-26199500	1	26199549	26200049	+	788	1-26195000	1	26195000	26195500	+	133	4549	10	0.070444	1000	-16.2917	0.029661	1	0.070444	100	-0.455897	823	105	Yes	NA	Yes	NA	NA	Yes
AT1G29090	AT1G29080	1-10163500	1	10163417	10163917	+	729	1-10157000	1	10156996	10157496	+	112	6421	13	0.070444	1300	-24.0985	1.9e-05	2	0.070444	200	-1.3309	571	104	Yes	NA	Yes	NA	NA	NA
AT2G32120	AT2G32100	2-13652000	2	13651877	13652377	+	152	2-13647500	2	13647551	13648051	+	365	4326	10	0.070444	1000	-16.2555	0.030398	1	0.070444	100	-0.456047	111	468	NA	Yes	NA	NA	Yes	Yes
AT1G22420	AT1G22403	1-7917000	1	7916918	7917418	+	155	1-7909500	1	7909472	7909972	+	1177	7446	10	0.070444	1000	-16.2506	0.030497	1	0.070444	100	-0.456139	115	1104	NA	Yes	NA	NA	NA	Yes
AT1G70890	AT1G70850	1-26726000	1	26726055	26726555	+	1651	1-26715000	1	26715004	26715504	+	171	11051	10	0.070444	1000	-16.2276	0.030991	1	0.070444	100	-0.456449	1490	131	Yes	NA	NA	Yes	Yes	NA
AT2G32370	AT2G32350	2-13741500	2	13741483	13741983	+	127	2-13735500	2	13735408	13735908	+	1314	6075	10	0.070444	1000	-16.3054	0.029386	1	0.070444	100	-0.456499	134	1000	NA	Yes	Yes	Yes	NA	NA
AT1G78790	AT1G78750	1-29624500	1	29624490	29624990	+	201	1-29614000	1	29614006	29614506	+	977	10484	10	0.070444	1000	-16.1945	0.031749	1	0.070444	100	-0.457211	199	876	NA	Yes	NA	NA	Yes	Yes
AT3G11402	AT3G11350	3-3574000	3	3574062	3574562	+	867	3-3558500	3	3558486	3558986	+	288	15576	10	0.070444	1000	-16.138	0.03322	1	0.070444	100	-0.457281	917	209	Yes	NA	NA	NA	NA	NA
AT1G56410	AT1G56380	1-21117000	1	21116996	21117496	+	215	1-21102000	1	21101939	21102439	+	1351	15057	10	0.070444	1000	-16.1822	0.032047	1	0.070444	100	-0.457363	222	1153	NA	Yes	Yes	Yes	NA	NA
AT1G14120	AT1G14110	1-4834500	1	4834489	4834989	+	174	1-4830000	1	4830016	4830516	+	1906	4473	39	0.070444	3900	-112.003	0	17	0.070444	1700	-35.3553	139	1563	NA	Yes	NA	NA	NA	NA
AT2G23540	AT2G23520	2-10025000	2	10024976	10025476	+	2117	2-10015000	2	10014980	10015480	+	94	9996	15	0.070444	1500	-29.8692	0	3	0.070444	300	-2.53844	1844	71	Yes	NA	Yes	NA	NA	Yes
AT1G77520	AT1G77500	1-29130000	1	29130154	29130654	+	1282	1-29123000	1	29123016	29123516	+	140	7138	15	0.070444	1500	-29.515	0	3	0.070444	300	-2.53776	1177	74	Yes	NA	NA	NA	Yes	Yes
AT1G11590	AT1G11580	1-3894000	1	3894053	3894553	+	163	1-3889000	1	3888992	3889492	+	2085	5061	34	0.070444	3400	-93.0569	0	14	0.070444	1400	-26.8502	113	1643	NA	Yes	NA	NA	NA	Yes
AT2G18720	AT2G18710	2-8116500	2	8116415	8116915	+	1196	2-8113000	2	8113087	8113587	+	116	3328	21	0.070444	2100	-48.092	0	6	0.070444	600	-7.54105	1118	94	Yes	NA	NA	NA	Yes	Yes
AT1G55720	AT1G55700	1-20830000	1	20830076	20830576	+	1860	1-20821500	1	20821459	20821959	+	224	8617	23	0.070444	2300	-53.6371	0	7	0.070444	700	-9.50562	1451	140	Yes	NA	Yes	NA	NA	NA
AT1G53790	AT1G53780	1-20080500	1	20080638	20081138	+	2113	1-20075500	1	20075455	20075955	+	109	5183	22	0.070444	2200	-51.5117	0	7	0.070444	700	-9.66213	1662	60	Yes	NA	NA	NA	NA	Yes
AT2G28360	AT2G28340	2-12126000	2	12126112	12126612	+	55	2-12103500	2	12103620	12104120	+	1591	22492	12	0.070444	1200	-22.007	0.000141	2	0.070444	200	-1.331	33	1300	NA	Yes	NA	Yes	Yes	NA
AT1G74890	AT1G74875	1-28131500	1	28131667	28132167	+	1093	1-28129000	1	28128886	28129386	+	152	2781	21	0.070444	2100	-47.6529	0	6	0.070444	600	-7.50617	984	135	Yes	NA	NA	NA	NA	NA
AT1G11990	AT1G11960	1-4048500	1	4048485	4048985	+	1579	1-4042500	1	4042495	4042995	+	120	5990	17	0.070444	1700	-35.507	0	4	0.070444	400	-3.99463	1420	107	Yes	NA	Yes	NA	NA	Yes
AT2G19190	AT2G19170	2-8329500	2	8329525	8330025	+	1647	2-8315000	2	8314976	8315476	+	95	14549	12	0.070444	1200	-21.5202	0.000222	2	0.070444	200	-1.33099	1544	36	Yes	NA	NA	NA	NA	Yes
AT1G23230	AT1G23210	1-8246000	1	8246013	8246513	+	102	1-8240500	1	8240429	8240929	+	1428	5584	12	0.070444	1200	-21.4762	0.00023	2	0.070444	200	-1.33096	42	1273	NA	Yes	NA	NA	Yes	Yes
AT1G79890	AT1G79870	1-30050000	1	30049886	30050386	+	44	1-30044500	1	30044574	30045074	+	1390	5312	9	0.070444	900	-14.3991	0.184158	1	0.070444	100	-0.445282	22	1391	NA	NA	NA	NA	Yes	Yes
AT2G35585	AT2G35550	2-14937000	2	14936807	14937307	+	1486	2-14930500	2	14930423	14930923	+	68	6384	12	0.070444	1200	-21.7813	0.000175	2	0.070444	200	-1.33095	1089	46	Yes	NA	NA	NA	Yes	NA
AT1G32440	AT1G32430	1-11714500	1	11714520	11715020	+	65	1-11705500	1	11705518	11706018	+	1752	9002	14	0.070444	1400	-27.436	1e-06	3	0.070444	300	-2.55516	36	1327	NA	Yes	NA	Yes	Yes	NA
AT2G30680	AT2G30660	2-13074500	2	13074456	13074956	+	57	2-13061000	2	13060997	13061497	+	1916	13459	12	0.070444	1200	-21.965	0.000147	2	0.070444	200	-1.33095	47	1542	NA	Yes	Yes	Yes	NA	Yes
AT2G19090	AT2G19070	2-8265500	2	8265509	8266009	+	112	2-8261500	2	8261502	8262002	+	1346	4007	22	0.070444	2200	-51.4514	0	7	0.070444	700	-9.59786	78	1173	NA	Yes	NA	Yes	Yes	NA
AT2G17090	AT2G17070	2-7436500	2	7436376	7436876	+	1814	2-7430500	2	7430572	7431072	+	133	5804	24	0.070444	2400	-57.7833	0	8	0.070444	800	-11.6864	1270	111	Yes	NA	Yes	Yes	NA	NA
AT1G61700	AT1G61690	1-22787000	1	22787035	22787535	+	1234	1-22783000	1	22783049	22783549	+	178	3986	22	0.070444	2200	-50.6645	0	7	0.070444	700	-9.58513	1256	83	Yes	NA	Yes	Yes	Yes	Yes
AT1G60460	AT1G60450	1-22278000	1	22278009	22278509	+	88	1-22273000	1	22273021	22273521	+	1672	4988	20	0.070444	2000	-45.4139	0	6	0.070444	600	-7.59602	64	1560	NA	Yes	NA	Yes	Yes	NA
AT1G51600	AT1G51580	1-19134000	1	19134003	19134503	+	62	1-19126000	1	19126071	19126571	+	1840	7932	18	0.070444	1800	-39.8118	0	5	0.070444	500	-5.7363	52	1555	NA	Yes	NA	NA	Yes	Yes
AT1G72020	AT1G72000	1-27109500	1	27109541	27110041	+	68	1-27103000	1	27102973	27103473	+	1667	6568	12	0.070444	1200	-21.7813	0.000175	2	0.070444	200	-1.33093	60	1329	NA	Yes	NA	NA	Yes	NA
AT1G06270	AT1G06240	1-1919500	1	1919442	1919942	+	1081	1-1911500	1	1911407	1911907	+	81	8035	12	0.070444	1200	-21.6325	0.000201	2	0.070444	200	-1.33092	1015	61	Yes	NA	NA	NA	Yes	NA
AT2G34230	AT2G34210	2-14456500	2	14456478	14456978	+	84	2-14446500	2	14446505	14447005	+	1940	9973	12	0.070444	1200	-21.6051	0.000206	2	0.070444	200	-1.33092	61	1616	NA	Yes	NA	NA	NA	NA
AT2G21730	AT2G21720	2-9281000	2	9280854	9281354	+	969	2-9274000	2	9273973	9274473	+	74	6881	12	0.070444	1200	-21.7057	0.000188	2	0.070444	200	-1.33092	646	62	Yes	NA	Yes	NA	NA	NA
AT2G23550	AT2G23540	2-10028000	2	10027938	10028438	+	135	2-10025000	2	10025015	10025515	+	2117	2923	31	0.070444	3100	-82.5788	0	13	0.070444	1300	-24.3181	84	1844	NA	Yes	NA	Yes	NA	NA
AT1G15520	AT1G15510	1-5337500	1	5337451	5337951	+	1123	1-5330000	1	5330044	5330544	+	88	7407	18	0.070444	1800	-39.0192	0	5	0.070444	500	-5.72915	905	55	Yes	NA	NA	NA	NA	Yes
AT1G11070	AT1G11050	1-3693500	1	3693394	3693894	+	1700	1-3683000	1	3682977	3683477	+	91	10417	12	0.070444	1200	-21.5486	0.000216	2	0.070444	200	-1.33092	1473	67	Yes	NA	NA	NA	NA	Yes
AT2G37100	AT2G37070	2-15591500	2	15591540	15592040	+	1438	2-15580500	2	15580486	15580986	+	41	11054	9	0.070444	900	-14.4554	0.174231	1	0.070444	100	-0.448887	1576	30	Yes	NA	NA	NA	Yes	NA
AT1G71160	AT1G71110	1-26829000	1	26829019	26829519	+	1607	1-26820500	1	26820555	26821055	+	95	8464	12	0.070444	1200	-21.5202	0.000222	2	0.070444	200	-1.33092	1059	69	Yes	NA	NA	NA	Yes	Yes
AT2G01190	AT2G01180	2-115500	2	115459	115959	+	1561	2-106500	2	106506	107006	+	49	8953	9	0.070444	900	-14.3218	0.198457	1	0.070444	100	-0.449205	1516	31	Yes	NA	NA	NA	Yes	Yes
AT2G36710	AT2G36700	2-15390500	2	15390344	15390844	+	1111	2-15386000	2	15386066	15386566	+	126	4278	22	0.070444	2200	-51.2106	0	7	0.070444	700	-9.55668	625	97	Yes	NA	NA	NA	NA	NA
AT1G30680	AT1G30660	1-10886000	1	10885917	10886417	+	82	1-10877000	1	10877023	10877523	+	1113	8894	12	0.070444	1200	-21.6231	0.000203	2	0.070444	200	-1.33091	75	1051	NA	Yes	NA	NA	Yes	NA
AT1G77260	AT1G77250	1-29024500	1	29024551	29025051	+	114	1-29022500	1	29022419	29022919	+	2052	2132	31	0.070444	3100	-83.3012	0	13	0.070444	1300	-24.2777	88	1737	NA	Yes	NA	NA	Yes	Yes
AT2G48140	AT2G48120	2-19686000	2	19686108	19686608	+	906	2-19681000	2	19680962	19681462	+	103	5146	12	0.070444	1200	-21.4704	0.000231	2	0.070444	200	-1.33091	606	77	Yes	NA	NA	NA	NA	Yes
AT2G26460	AT2G26450	2-11258000	2	11257923	11258423	+	1386	2-11251500	2	11251540	11252040	+	125	6383	22	0.070444	2200	-51.2259	0	7	0.070444	700	-9.54847	1449	102	Yes	NA	NA	NA	Yes	NA
AT1G75940	AT1G75910	1-28513000	1	28512946	28513446	+	124	1-28502000	1	28502041	28502541	+	1529	10905	20	0.070444	2000	-44.7563	0	6	0.070444	600	-7.56865	76	1385	NA	Yes	Yes	Yes	NA	NA
AT3G12740	AT3G12730	3-4050500	3	4050547	4051047	+	58	3-4047500	3	4047415	4047915	+	989	3132	9	0.070444	900	-14.2185	0.218734	1	0.070444	100	-0.450531	36	1064	NA	Yes	NA	NA	NA	NA
AT2G39260	AT2G39240	2-16395500	2	16395567	16396067	+	60	2-16387000	2	16387198	16387698	+	862	8369	9	0.070444	900	-14.2	0.222401	1	0.070444	100	-0.450752	37	794	NA	Yes	NA	NA	Yes	NA
AT1G68400	AT1G68390	1-25648500	1	25648417	25648917	+	876	1-25643000	1	25643078	25643578	+	122	5339	12	0.070444	1200	-21.3793	0.000249	2	0.070444	200	-1.33091	823	96	Yes	NA	NA	NA	NA	NA
AT1G16300	AT1G16270	1-5575000	1	5574957	5575457	+	1773	1-5565500	1	5565495	5565995	+	73	9462	9	0.070444	900	-14.106	0.240641	1	0.070444	100	-0.451702	1501	42	Yes	NA	NA	NA	NA	Yes
AT1G63450	AT1G63420	1-23532000	1	23531914	23532414	+	1606	1-23518000	1	23517943	23518443	+	146	13971	12	0.070444	1200	-21.2993	0.000265	2	0.070444	200	-1.3309	1496	124	Yes	NA	NA	NA	Yes	Yes
AT1G48095	AT1G48090	1-17760000	1	17760000	17760500	+	1152	1-17747000	1	17746920	17747420	+	73	13080	9	0.070444	900	-14.106	0.240641	1	0.070444	100	-0.452169	661	45	Yes	NA	NA	NA	NA	Yes
AT1G70850	AT1G70820	1-26715000	1	26714907	26715407	+	171	1-26706000	1	26705947	26706447	+	1413	8960	12	0.070444	1200	-21.2405	0.000278	2	0.070444	200	-1.3309	131	1200	NA	Yes	Yes	NA	NA	Yes
AT1G13980	AT1G13970	1-4790000	1	4789843	4790343	+	77	1-4782000	1	4782001	4782501	+	1222	7842	9	0.070444	900	-14.0837	0.244662	1	0.070444	100	-0.452312	46	1043	NA	Yes	NA	NA	Yes	NA
AT2G25355	AT2G25330	2-10801500	2	10801470	10801970	+	1791	2-10789500	2	10789483	10789983	+	74	11987	9	0.070444	900	-14.1002	0.241778	1	0.070444	100	-0.452312	1852	46	Yes	NA	Yes	NA	Yes	NA
AT2G01200	AT2G01190	2-118500	2	118578	119078	+	155	2-115000	2	115213	115713	+	583	3365	12	0.070444	1200	-21.2759	0.00027	2	0.070444	200	-1.3309	136	763	NA	Yes	NA	NA	Yes	Yes
AT1G07340	AT1G07310	1-2254500	1	2254638	2255138	+	1257	1-2247500	1	2247563	2248063	+	63	7075	9	0.070444	900	-14.1747	0.227458	1	0.070444	100	-0.452578	1235	48	Yes	NA	NA	NA	NA	Yes
AT1G24577	AT1G24560	1-8713000	1	8712835	8713335	+	1158	1-8705000	1	8705016	8705516	+	58	7819	9	0.070444	900	-14.2185	0.218734	1	0.070444	100	-0.452578	1023	48	Yes	NA	NA	NA	NA	NA
AT1G11490	AT1G11470	1-3869500	1	3869488	3869988	+	1572	1-3860000	1	3860014	3860514	+	186	9474	12	0.070444	1200	-21.213	0.000284	2	0.070444	200	-1.3309	1048	144	Yes	NA	NA	NA	NA	NA
AT2G44500	AT2G44490	2-18375500	2	18375493	18375993	+	80	2-18365500	2	18365429	18365929	+	1775	10064	9	0.070444	900	-14.0686	0.247478	1	0.070444	100	-0.452703	49	1783	NA	Yes	NA	NA	Yes	Yes
AT1G14620	AT1G14590	1-5016500	1	5016453	5016953	+	45	1-5000000	1	5000038	5000538	+	1851	16415	9	0.070444	900	-14.3821	0.187217	1	0.070444	100	-0.452824	50	1909	NA	Yes	NA	Yes	Yes	Yes
AT3G01580	AT3G01550	3-224500	3	224530	225030	+	81	3-218000	3	218092	218592	+	2111	6438	9	0.070444	900	-14.0638	0.248273	1	0.070444	100	-0.452824	50	1937	NA	Yes	NA	NA	Yes	Yes
AT1G34060	AT1G34046	1-12398000	1	12397923	12398423	+	82	1-12388500	1	12388489	12388989	+	664	9434	9	0.070444	900	-14.0591	0.249094	1	0.070444	100	-0.452939	51	504	NA	Yes	NA	Yes	NA	NA
AT1G61120	AT1G61090	1-22526000	1	22525978	22526478	+	73	1-22499000	1	22499026	22499526	+	1591	26952	9	0.070444	900	-14.106	0.240641	1	0.070444	100	-0.45305	52	1433	NA	Yes	NA	Yes	NA	NA
AT1G56570	AT1G56550	1-21197000	1	21197005	21197505	+	91	1-21187000	1	21187062	21187562	+	1950	9943	9	0.070444	900	-14.0219	0.255321	1	0.070444	100	-0.453156	53	1825	NA	Yes	NA	Yes	Yes	Yes
AT3G13840	AT3G13820	3-4555500	3	4555585	4556085	+	125	3-4549500	3	4549582	4550082	+	1858	6003	32	0.070444	3200	-86.6329	0	14	0.070444	1400	-27.1185	84	1312	NA	Yes	NA	NA	NA	NA
AT2G03360	AT2G03270	2-1024000	2	1024069	1024569	+	1283	2-995500	2	995554	996054	+	96	28515	9	0.070444	900	-14.0044	0.258028	1	0.070444	100	-0.453358	1125	55	Yes	NA	NA	NA	NA	Yes
AT1G71310	AT1G71300	1-26878500	1	26878446	26878946	+	85	1-26874000	1	26874118	26874618	+	1073	4328	9	0.070444	900	-14.0458	0.251437	1	0.070444	100	-0.453454	56	744	NA	Yes	NA	NA	Yes	NA
AT2G46510	AT2G46495	2-19091500	2	19091443	19091943	+	65	2-19084000	2	19084070	19084570	+	1281	7373	9	0.070444	900	-14.1591	0.230548	1	0.070444	100	-0.453454	56	926	NA	Yes	NA	Yes	Yes	NA
AT1G65170	AT1G65150	1-24210000	1	24209900	24210400	+	88	1-24205000	1	24205079	24205579	+	1049	4821	9	0.070444	900	-14.0334	0.253464	1	0.070444	100	-0.453546	57	907	NA	Yes	NA	NA	NA	NA
AT1G53040	AT1G53025	1-19765000	1	19765031	19765531	+	96	1-19759000	1	19758922	19759422	+	1761	6109	9	0.070444	900	-14.0044	0.258028	1	0.070444	100	-0.453803	60	1793	NA	Yes	NA	Yes	Yes	Yes
AT1G07720	AT1G07705	1-2391500	1	2391387	2391887	+	456	1-2384500	1	2384540	2385040	+	86	6847	9	0.070444	900	-14.0416	0.252124	1	0.070444	100	-0.453883	363	61	Yes	NA	NA	NA	Yes	Yes
AT1G50960	AT1G50950	1-18890000	1	18890010	18890510	+	968	1-18881500	1	18881466	18881966	+	101	8544	9	0.070444	900	-13.9886	0.260488	1	0.070444	100	-0.453883	915	61	Yes	NA	Yes	NA	NA	Yes
AT3G17600	AT3G17550	3-6020000	3	6019920	6020420	+	744	3-6005500	3	6005465	6005965	+	110	14455	9	0.070444	900	-13.964	0.264084	1	0.070444	100	-0.454109	895	64	Yes	NA	NA	Yes	Yes	NA
AT1G28610	AT1G28580	1-10055500	1	10055346	10055846	+	1206	1-10044500	1	10044552	10045052	+	85	10794	9	0.070444	900	-14.0458	0.251437	1	0.070444	100	-0.454248	1273	66	Yes	NA	Yes	NA	Yes	Yes
AT1G34580	AT1G34550	1-12660500	1	12660505	12661005	+	1061	1-12650000	1	12650039	12650539	+	101	10466	9	0.070444	900	-13.9886	0.260488	1	0.070444	100	-0.454561	972	71	Yes	NA	NA	NA	NA	Yes
AT3G11370	AT3G11320	3-3561000	3	3560981	3561481	+	2092	3-3547000	3	3546905	3547405	+	89	14076	9	0.070444	900	-14.0295	0.254073	1	0.070444	100	-0.454618	1802	72	Yes	NA	NA	NA	NA	Yes
AT1G49970	AT1G49950	1-18503500	1	18503381	18503881	+	1397	1-18497000	1	18497009	18497509	+	96	6372	9	0.070444	900	-14.0044	0.258028	1	0.070444	100	-0.454979	1157	79	Yes	NA	NA	NA	Yes	Yes
AT1G30960	AT1G30950	1-11039500	1	11039586	11040086	+	100	1-11037000	1	11036783	11037283	+	297	2803	9	0.070444	900	-13.9916	0.260055	1	0.070444	100	-0.455281	86	193	NA	Yes	NA	Yes	Yes	NA
AT1G31420	AT1G31360	1-11250000	1	11250031	11250531	+	1998	1-11237500	1	11237450	11237950	+	110	12581	9	0.070444	900	-13.964	0.264084	1	0.070444	100	-0.455358	1658	88	Yes	NA	NA	NA	Yes	Yes
AT1G62810	AT1G62800	1-23261500	1	23261459	23261959	+	130	1-23256000	1	23256108	23256608	+	425	5351	9	0.070444	900	-13.9219	0.270262	1	0.070444	100	-0.455396	89	418	NA	Yes	NA	NA	Yes	Yes
AT2G03560	AT2G03530	2-1080500	2	1080627	1081127	+	1289	2-1073500	2	1073394	1073894	+	91	7233	14	0.070444	1400	-27.0371	1e-06	3	0.070444	300	-2.53821	1128	72	Yes	NA	NA	NA	NA	Yes
AT3G10010	AT3G10000	3-3081500	3	3081496	3081996	+	102	3-3077000	3	3076903	3077403	+	1217	4593	9	0.070444	900	-13.9857	0.260906	1	0.070444	100	-0.455571	94	1265	NA	Yes	NA	Yes	Yes	NA
AT1G64620	AT1G64610	1-24007000	1	24007143	24007643	+	977	1-23999000	1	23998946	23999446	+	140	8197	9	0.070444	900	-13.9054	0.272914	1	0.070444	100	-0.455635	794	96	Yes	NA	Yes	NA	Yes	Yes
AT2G32795	AT2G32765	2-13910500	2	13910403	13910903	+	1439	2-13895000	2	13894944	13895444	+	90	15459	9	0.070444	900	-14.0257	0.254729	1	0.070444	100	-0.455635	1626	96	Yes	NA	NA	NA	Yes	Yes
AT1G05510	AT1G05490	1-1629500	1	1629530	1630030	+	132	1-1622500	1	1622606	1623106	+	1327	6924	9	0.070444	900	-13.9184	0.27086	1	0.070444	100	-0.455757	100	862	NA	Yes	NA	NA	NA	NA
AT1G77290	AT1G77250	1-29038000	1	29037981	29038481	+	89	1-29022500	1	29022369	29022869	+	2052	15612	9	0.070444	900	-14.0295	0.254073	1	0.070444	100	-0.455757	100	1737	NA	Yes	NA	NA	Yes	Yes
AT2G46495	AT2G46480	2-19084000	2	19084134	19084634	+	1281	2-19077500	2	19077662	19078162	+	143	6472	9	0.070444	900	-13.901	0.273654	1	0.070444	100	-0.455757	926	100	Yes	NA	Yes	NA	NA	NA
AT1G64260	AT1G64200	1-23847500	1	23847561	23848061	+	1769	1-23829000	1	23829019	23829519	+	158	18542	9	0.070444	900	-13.8812	0.276794	1	0.070444	100	-0.45587	1371	104	Yes	NA	NA	NA	Yes	Yes
AT1G53030	AT1G53023	1-19760500	1	19760408	19760908	+	115	1-19755500	1	19755617	19756117	+	789	4791	9	0.070444	900	-13.9521	0.26576	1	0.070444	100	-0.455897	105	775	NA	Yes	NA	Yes	Yes	NA
AT1G70110	AT1G70070	1-26407000	1	26407125	26407625	+	1396	1-26390000	1	26390021	26390521	+	149	17104	9	0.070444	900	-13.8926	0.274877	1	0.070444	100	-0.455949	1234	107	Yes	NA	NA	NA	NA	Yes
AT1G67880	AT1G67860	1-25454000	1	25453948	25454448	+	127	1-25445000	1	25444944	25445444	+	544	9004	9	0.070444	900	-13.9273	0.26942	1	0.070444	100	-0.455974	108	499	NA	Yes	NA	NA	Yes	NA
AT1G52080	AT1G52070	1-19371500	1	19371438	19371938	+	170	1-19366000	1	19366052	19366552	+	988	5386	9	0.070444	900	-13.868	0.279007	1	0.070444	100	-0.455999	109	839	NA	Yes	NA	Yes	Yes	NA
AT3G08020	AT3G07990	3-2559500	3	2559540	2560040	+	84	3-2553000	3	2553072	2553572	+	1464	6468	16	0.070444	1600	-32.9626	0	4	0.070444	400	-4.00928	73	1086	NA	Yes	NA	NA	Yes	Yes
AT2G27530	AT2G27460	2-11764000	2	11764065	11764565	+	1329	2-11740500	2	11740627	11741127	+	140	23438	9	0.070444	900	-13.9054	0.272914	1	0.070444	100	-0.456047	1387	111	Yes	NA	Yes	NA	Yes	Yes
AT1G54340	AT1G54310	1-20284000	1	20284014	20284514	+	942	1-20274500	1	20274462	20274962	+	182	9552	9	0.070444	900	-13.8565	0.281028	1	0.070444	100	-0.456117	820	114	Yes	NA	NA	NA	Yes	Yes
AT1G75150	AT1G75110	1-28205500	1	28205474	28205974	+	155	1-28195000	1	28195047	28195547	+	1804	10427	9	0.070444	900	-13.8849	0.27618	1	0.070444	100	-0.456203	118	1680	NA	Yes	NA	NA	Yes	Yes
AT1G12120	AT1G12100	1-4116000	1	4116026	4116526	+	152	1-4095000	1	4095129	4095629	+	1166	20897	9	0.070444	900	-13.8886	0.275539	1	0.070444	100	-0.456361	126	1240	NA	Yes	NA	NA	Yes	Yes
AT1G65810	AT1G65790	1-24479000	1	24478996	24479496	+	254	1-24470000	1	24469799	24470299	+	1069	9197	9	0.070444	900	-13.8108	0.290359	1	0.070444	100	-0.456607	141	1008	NA	Yes	NA	Yes	NA	Yes
AT2G43270	AT2G43250	2-17988500	2	17988607	17989107	+	1627	2-17979000	2	17978978	17979478	+	124	9629	16	0.070444	1600	-32.5043	0	4	0.070444	400	-4.00687	1249	77	Yes	NA	NA	NA	Yes	Yes
AT2G28830	AT2G28810	2-12370000	2	12370072	12370572	+	1198	2-12364000	2	12364050	12364550	+	129	6022	14	0.070444	1400	-26.7561	1e-06	3	0.070444	300	-2.53602	1303	83	Yes	NA	Yes	Yes	Yes	NA
AT2G15370	AT2G15350	2-6699000	2	6698938	6699438	+	228	2-6689000	2	6689018	6689518	+	1883	9920	9	0.070444	900	-13.824	0.287449	1	0.070444	100	-0.45683	158	1440	NA	Yes	Yes	Yes	NA	NA
AT2G27020	AT2G26975	2-11529000	2	11528917	11529417	+	190	2-11513000	2	11512960	11513460	+	1557	15957	9	0.070444	900	-13.8497	0.28243	1	0.070444	100	-0.45693	167	1684	NA	Yes	NA	NA	Yes	Yes
AT3G09210	AT3G09190	3-2826500	3	2826343	2826843	+	1813	3-2822000	3	2821989	2822489	+	159	4354	18	0.070444	1800	-38.2367	0	5	0.070444	500	-5.67797	1656	95	Yes	NA	NA	NA	Yes	NA
AT2G28970	AT2G28960	2-12443500	2	12443584	12444084	+	609	2-12438000	2	12437970	12438470	+	199	5614	9	0.070444	900	-13.8427	0.283749	1	0.070444	100	-0.457019	559	176	Yes	NA	Yes	Yes	NA	NA
AT1G72130	AT1G72110	1-27138000	1	27137871	27138371	+	1016	1-27131000	1	27130947	27131447	+	247	6924	9	0.070444	900	-13.8141	0.289665	1	0.070444	100	-0.457274	820	208	Yes	NA	NA	NA	Yes	NA
AT1G55430	AT1G55420	1-20699000	1	20698936	20699436	+	289	1-20693000	1	20692868	20693368	+	305	6068	9	0.070444	900	-13.7969	0.293514	1	0.070444	100	-0.457345	239	219	NA	NA	NA	Yes	Yes	Yes
AT1G10390	AT1G10385	1-3407500	1	3407567	3408067	+	124	1-3404000	1	3403964	3404464	+	1276	3603	14	0.070444	1400	-26.7828	1e-06	3	0.070444	300	-2.53491	90	857	NA	Yes	NA	NA	NA	NA
AT1G14190	AT1G14180	1-4852500	1	4852519	4853019	+	455	1-4849000	1	4849020	4849520	+	161	3499	9	0.070444	900	-13.8777	0.277345	1	0.070444	100	-0.457419	377	232	NA	Yes	NA	NA	NA	Yes
AT2G40990	AT2G40980	2-17106500	2	17106519	17107019	+	1829	2-17102000	2	17102059	17102559	+	136	4460	25	0.070444	2500	-61.1424	0	9	0.070444	900	-13.9219	1369	130	Yes	NA	NA	NA	NA	Yes
AT2G21930	AT2G21890	2-9348500	2	9348473	9348973	+	357	2-9331000	2	9330914	9331414	+	1264	17559	9	0.070444	900	-13.7778	0.297745	1	0.070444	100	-0.457917	384	1088	NA	Yes	Yes	Yes	NA	NA
AT1G66090	AT1G66060	1-24603500	1	24603618	24604118	+	424	1-24594500	1	24594617	24595117	+	721	9001	9	0.070444	900	-13.765	0.300712	1	0.070444	100	-0.457965	410	573	Yes	NA	Yes	NA	Yes	Yes
AT2G18340	AT2G18328	2-7970000	2	7970104	7970604	+	1320	2-7964000	2	7963980	7964480	+	127	6124	14	0.070444	1400	-26.7665	1e-06	3	0.070444	300	-2.53371	1155	99	Yes	NA	NA	NA	Yes	NA
AT1G65540	AT1G65510	1-24364000	1	24363989	24364489	+	148	1-24359000	1	24359135	24359635	+	1434	4854	14	0.070444	1400	-26.6718	2e-06	3	0.070444	300	-2.53282	107	1609	NA	Yes	NA	Yes	Yes	Yes
AT1G29200	AT1G29180	1-10207500	1	10207503	10208003	+	142	1-10200500	1	10200522	10201022	+	1988	6981	18	0.070444	1800	-38.3492	0	5	0.070444	500	-5.66751	112	1456	NA	Yes	NA	NA	NA	Yes
AT1G61095	AT1G61080	1-22505500	1	22505424	22505924	+	137	1-22496000	1	22496117	22496617	+	1917	9307	14	0.070444	1400	-26.7176	2e-06	3	0.070444	300	-2.53215	114	1770	NA	Yes	NA	Yes	NA	NA
AT1G21110	AT1G21070	1-7391000	1	7390939	7391439	+	1784	1-7377500	1	7377510	7378010	+	158	13429	14	0.070444	1400	-26.6358	2e-06	3	0.070444	300	-2.53102	1461	128	Yes	NA	Yes	NA	NA	Yes
AT1G51340	AT1G51320	1-19032500	1	19032512	19033012	+	165	1-19026500	1	19026371	19026871	+	1491	6141	14	0.070444	1400	-26.6133	2e-06	3	0.070444	300	-2.53088	130	1240	NA	Yes	NA	Yes	Yes	NA
AT1G61730	AT1G61720	1-22794500	1	22794367	22794867	+	168	1-22792000	1	22791916	22792416	+	735	2451	14	0.070444	1400	-26.6043	2e-06	3	0.070444	300	-2.53055	135	698	NA	Yes	NA	Yes	Yes	NA
AT1G20370	AT1G20360	1-7052500	1	7052457	7052957	+	854	1-7047000	1	7046954	7047454	+	241	5503	20	0.070444	2000	-44.0204	0	6	0.070444	600	-7.47387	757	229	Yes	NA	NA	NA	Yes	NA
AT1G78740	AT1G78720	1-29610000	1	29610003	29610503	+	243	1-29606000	1	29606021	29606521	+	1535	3982	36	0.070444	3600	-99.2789	0	16	0.070444	1600	-32.0183	265	1148	NA	Yes	NA	NA	NA	NA
AT2G33080	AT2G33070	2-14033000	2	14032972	14033472	+	65	2-14030500	2	14030559	14031059	+	601	2413	15	0.070444	1500	-30.3756	0	4	0.070444	400	-4.06419	34	498	NA	NA	NA	NA	NA	NA
AT1G73140	AT1G73130	1-27502500	1	27502481	27502981	+	296	1-27499500	1	27499518	27500018	+	1500	2963	43	0.070444	4300	-125.578	0	21	0.070444	2100	-47.065	268	1437	NA	Yes	NA	NA	NA	Yes
AT2G25160	AT2G25150	2-10710000	2	10710052	10710552	+	634	2-10702500	2	10702463	10702963	+	414	7589	14	0.070444	1400	-26.3144	2e-06	3	0.070444	300	-2.52475	421	413	Yes	NA	NA	NA	NA	Yes
AT2G20150	AT2G20140	2-8697000	2	8697069	8697569	+	1434	2-8693500	2	8693485	8693985	+	116	3584	24	0.070444	2400	-58.1073	0	9	0.070444	900	-14.0735	1317	79	Yes	NA	NA	NA	NA	Yes
AT1G32940	AT1G32910	1-11940000	1	11940032	11940532	+	48	1-11925500	1	11925516	11926016	+	1994	14516	11	0.070444	1100	-19.4538	0.001578	2	0.070444	200	-1.331	33	1853	NA	Yes	NA	NA	Yes	NA
AT1G31380	AT1G31360	1-11241000	1	11240877	11241377	+	1450	1-11237000	1	11237117	11237617	+	132	3760	30	0.070444	3000	-78.9812	0	13	0.070444	1300	-24.2155	1138	95	Yes	NA	NA	NA	NA	Yes
AT3G06400	AT3G06390	3-1944500	3	1944649	1945149	+	53	3-1939000	3	1938964	1939464	+	1625	5685	11	0.070444	1100	-19.3471	0.001753	2	0.070444	200	-1.33098	37	1504	NA	Yes	NA	NA	Yes	NA
AT1G31410	AT1G31380	1-11247000	1	11246965	11247465	+	166	1-11240500	1	11240655	11241155	+	1473	6310	21	0.070444	2100	-47.5362	0	7	0.070444	700	-9.52933	116	1073	NA	Yes	NA	NA	Yes	NA
AT1G51172	AT1G51170	1-18963000	1	18963088	18963588	+	120	1-18954500	1	18954509	18955009	+	1610	8579	13	0.070444	1300	-24.0554	2e-05	3	0.070444	300	-2.55334	38	1620	NA	Yes	NA	NA	NA	Yes
AT1G34575	AT1G34550	1-12658000	1	12657939	12658439	+	1717	1-12652500	1	12652605	12653105	+	81	5334	18	0.070444	1800	-39.1777	0	6	0.070444	600	-7.81763	1581	29	Yes	NA	NA	NA	Yes	Yes
AT3G14820	AT3G14810	3-4978500	3	4978487	4978987	+	61	3-4973500	3	4973573	4974073	+	956	4914	11	0.070444	1100	-19.2157	0.001991	2	0.070444	200	-1.33094	49	910	NA	Yes	Yes	NA	NA	Yes
AT1G51538	AT1G51530	1-19114000	1	19113890	19114390	+	1151	1-19111000	1	19110953	19111453	+	165	2937	24	0.070444	2400	-57.3653	0	9	0.070444	900	-13.964	930	110	Yes	NA	NA	NA	Yes	NA
AT1G09483	AT1G09440	1-3061000	1	3061004	3061504	+	1906	1-3047000	1	3047010	3047510	+	82	13994	11	0.070444	1100	-18.9995	0.002422	2	0.070444	200	-1.33093	1714	53	Yes	NA	Yes	NA	NA	NA
AT1G60270	AT1G60260	1-22223000	1	22223094	22223594	+	730	1-22218500	1	22218560	22219060	+	67	4534	11	0.070444	1100	-19.1391	0.00214	2	0.070444	200	-1.33093	683	53	Yes	NA	NA	NA	Yes	Yes
AT1G35860	AT1G35850	1-13332500	1	13332463	13332963	+	103	1-13331000	1	13330959	13331459	+	1286	1504	43	0.070444	4300	-132.412	0	24	0.070444	2400	-60.2714	65	737	NA	NA	NA	NA	NA	NA
AT2G04800	AT2G04780	2-1687000	2	1687164	1687664	+	1077	2-1677500	2	1677525	1678025	+	72	9639	11	0.070444	1100	-19.0857	0.002247	2	0.070444	200	-1.33093	938	55	Yes	NA	Yes	NA	Yes	Yes
AT3G04990	AT3G04980	3-1384500	3	1384602	1385102	+	558	3-1379000	3	1379001	1379501	+	81	5601	11	0.070444	1100	-19.0071	0.002406	2	0.070444	200	-1.33093	436	55	Yes	NA	NA	NA	NA	NA
AT1G49100	AT1G49050	1-18169500	1	18169437	18169937	+	1280	1-18151000	1	18151077	18151577	+	92	18360	11	0.070444	1100	-18.933	0.002558	2	0.070444	200	-1.33093	1147	57	Yes	NA	Yes	NA	NA	Yes
AT1G17220	AT1G17200	1-5889000	1	5888986	5889486	+	94	1-5879000	1	5879051	5879551	+	1637	9935	11	0.070444	1100	-18.9215	0.002582	2	0.070444	200	-1.33093	59	1437	NA	Yes	NA	Yes	Yes	Yes
AT1G66660	AT1G66610	1-24862000	1	24862128	24862628	+	981	1-24850000	1	24850024	24850524	+	105	12104	11	0.070444	1100	-18.8663	0.002695	2	0.070444	200	-1.33092	757	62	Yes	NA	NA	NA	Yes	NA
AT3G10845	AT3G10820	3-3395000	3	3394880	3395380	+	1681	3-3388000	3	3388060	3388560	+	74	6820	11	0.070444	1100	-19.0665	0.002286	2	0.070444	200	-1.33092	1437	62	Yes	NA	NA	NA	NA	Yes
AT1G29060	AT1G29025	1-10148500	1	10148520	10149020	+	83	1-10126500	1	10126449	10126949	+	1654	22071	11	0.070444	1100	-18.9921	0.002437	2	0.070444	200	-1.33092	67	1348	NA	Yes	NA	NA	Yes	NA
AT1G54330	AT1G54310	1-20280500	1	20280606	20281106	+	1359	1-20273500	1	20273596	20274096	+	71	7010	11	0.070444	1100	-19.0957	0.002227	2	0.070444	200	-1.33092	1255	67	Yes	NA	NA	NA	NA	Yes
AT3G01820	AT3G01780	3-295000	3	294883	295383	+	1893	3-282000	3	281971	282471	+	107	12912	11	0.070444	1100	-18.8575	0.002713	2	0.070444	200	-1.33092	1932	67	Yes	NA	NA	NA	Yes	Yes
AT2G29940	AT2G29930	2-12761000	2	12760824	12761324	+	1037	2-12757000	2	12756978	12757478	+	102	3846	11	0.070444	1100	-18.8801	0.002667	2	0.070444	200	-1.33092	953	69	Yes	NA	Yes	NA	NA	NA
AT1G29700	AT1G29690	1-10385500	1	10385486	10385986	+	70	1-10381000	1	10381052	10381552	+	1383	4434	15	0.070444	1500	-30.2556	0	4	0.070444	400	-4.02242	57	1302	NA	Yes	NA	NA	Yes	Yes
AT1G26700	AT1G26680	1-9228000	1	9228101	9228601	+	81	1-9220000	1	9220060	9220560	+	1201	8041	11	0.070444	1100	-19.0071	0.002406	2	0.070444	200	-1.33092	73	842	NA	Yes	Yes	NA	NA	NA
AT3G07990	AT3G07980	3-2553500	3	2553538	2554038	+	1529	3-2547000	3	2547068	2547568	+	100	6470	11	0.070444	1100	-18.8898	0.002646	2	0.070444	200	-1.33091	1319	79	Yes	NA	NA	NA	Yes	Yes
AT2G35810	AT2G35800	2-15049000	2	15049089	15049589	+	1623	2-15045500	2	15045624	15046124	+	86	3465	11	0.070444	1100	-18.971	0.002481	2	0.070444	200	-1.33091	1645	80	Yes	NA	NA	NA	Yes	Yes
AT2G42720	AT2G42700	2-17785500	2	17785437	17785937	+	1038	2-17780500	2	17780522	17781022	+	125	4915	11	0.070444	1100	-18.7917	0.002851	2	0.070444	200	-1.33091	1067	82	Yes	NA	NA	NA	NA	Yes
AT2G42230	AT2G42200	2-17594000	2	17594016	17594516	+	105	2-17588000	2	17588016	17588516	+	1531	6000	11	0.070444	1100	-18.8663	0.002695	2	0.070444	200	-1.33091	83	1554	NA	Yes	NA	NA	Yes	Yes
AT1G70110	AT1G70060	1-26407000	1	26407110	26407610	+	1396	1-26386500	1	26386522	26387022	+	130	20588	11	0.070444	1100	-18.7768	0.002882	2	0.070444	200	-1.33091	1234	86	Yes	NA	NA	NA	NA	Yes
AT1G11080	AT1G11050	1-3697500	1	3697430	3697930	+	1117	1-3682500	1	3682516	3683016	+	119	14914	11	0.070444	1100	-18.8113	0.002809	2	0.070444	200	-1.33091	1007	87	Yes	NA	NA	NA	NA	Yes
AT2G16230	AT2G16210	2-7038000	2	7037938	7038438	+	1440	2-7028000	2	7028037	7028537	+	116	9901	11	0.070444	1100	-18.822	0.002787	2	0.070444	200	-1.33091	1183	88	Yes	NA	Yes	Yes	NA	NA
AT1G77270	AT1G77250	1-29029500	1	29029468	29029968	+	135	1-29022000	1	29022091	29022591	+	1656	7377	11	0.070444	1100	-18.763	0.002913	2	0.070444	200	-1.33091	89	1410	NA	Yes	NA	NA	NA	Yes
AT1G65150	AT1G65130	1-24205500	1	24205444	24205944	+	1036	1-24199500	1	24199463	24199963	+	109	5981	11	0.070444	1100	-18.8491	0.002731	2	0.070444	200	-1.33091	1080	93	Yes	NA	NA	NA	NA	NA
AT1G12860	AT1G12855	1-4384500	1	4384402	4384902	+	78	1-4382500	1	4382486	4382986	+	1247	1916	17	0.070444	1700	-36.1288	0	5	0.070444	500	-5.68349	88	1104	NA	Yes	NA	NA	Yes	NA
AT3G01640	AT3G01620	3-239500	3	239635	240135	+	968	3-236000	3	236031	236531	+	164	3604	11	0.070444	1100	-18.7	0.003054	2	0.070444	200	-1.33091	896	100	Yes	NA	NA	NA	Yes	Yes
AT2G35920	AT2G35890	2-15076000	2	15075977	15076477	+	117	2-15068500	2	15068438	15068938	+	1825	7539	11	0.070444	1100	-18.8184	0.002795	2	0.070444	200	-1.3309	104	1353	NA	Yes	NA	NA	Yes	NA
AT1G51780	AT1G51760	1-19204500	1	19204554	19205054	+	2000	1-19200000	1	19200049	19200549	+	256	4505	24	0.070444	2400	-56.7685	0	9	0.070444	900	-13.8789	1767	160	Yes	NA	NA	NA	NA	Yes
AT1G52100	AT1G52080	1-19384500	1	19384467	19384967	+	883	1-19371500	1	19371418	19371918	+	170	13049	11	0.070444	1100	-18.6897	0.003078	2	0.070444	200	-1.3309	779	109	Yes	NA	Yes	NA	NA	Yes
AT2G18690	AT2G18660	2-8098500	2	8098321	8098821	+	1332	2-8090500	2	8090477	8090977	+	135	7844	11	0.070444	1100	-18.763	0.002913	2	0.070444	200	-1.3309	988	109	Yes	NA	Yes	NA	Yes	NA
AT1G20150	AT1G20132	1-6989000	1	6988952	6989452	+	145	1-6981500	1	6981559	6982059	+	1407	7393	17	0.070444	1700	-35.3161	0	5	0.070444	500	-5.67797	95	1260	NA	Yes	NA	Yes	Yes	NA
AT1G65360	AT1G65320	1-24281500	1	24281540	24282040	+	1875	1-24259500	1	24259416	24259916	+	122	22124	17	0.070444	1700	-35.4887	0	5	0.070444	500	-5.67797	1379	95	Yes	NA	Yes	NA	NA	Yes
AT2G32840	AT2G32830	2-13932500	2	13932471	13932971	+	168	2-13928500	2	13928546	13929046	+	2005	3925	19	0.070444	1900	-41.2413	0	6	0.070444	600	-7.49424	159	1721	NA	Yes	NA	Yes	Yes	Yes
AT2G41415	AT2G41380	2-17264500	2	17264482	17264982	+	104	2-17252500	2	17252423	17252923	+	1819	12059	13	0.070444	1300	-24.1485	1.8e-05	3	0.070444	300	-2.5409	62	1838	NA	Yes	NA	NA	NA	Yes
AT1G71300	AT1G71280	1-26875500	1	26875531	26876031	+	218	1-26871500	1	26871479	26871979	+	661	4052	11	0.070444	1100	-18.6282	0.003232	2	0.070444	200	-1.3309	132	660	Yes	NA	NA	NA	NA	NA
AT3G04590	AT3G04580	3-1239000	3	1239166	1239666	+	441	3-1235500	3	1235547	1236047	+	193	3619	11	0.070444	1100	-18.6564	0.003159	2	0.070444	200	-1.3309	354	145	NA	Yes	NA	NA	Yes	Yes
AT1G60920	AT1G60900	1-22429500	1	22429625	22430125	+	976	1-22425000	1	22424987	22425487	+	93	4638	13	0.070444	1300	-24.2323	1.7e-05	3	0.070444	300	-2.54	746	65	Yes	NA	NA	NA	NA	Yes
AT1G80990	AT1G80970	1-30424500	1	30424643	30425143	+	943	1-30421500	1	30421339	30421839	+	23	3304	12	0.070444	1200	-23.9588	2.1e-05	3	0.070444	300	-2.58384	739	20	Yes	NA	NA	NA	Yes	Yes
AT2G01800	AT2G01740	2-344000	2	344045	344545	+	1537	2-327000	2	327032	327532	+	45	17013	8	0.070444	800	-11.9993	1	1	0.070444	100	-0.445871	1257	23	Yes	NA	Yes	NA	NA	Yes
AT1G67460	AT1G67440	1-25270500	1	25270542	25271042	+	188	1-25264500	1	25264617	25265117	+	706	5925	11	0.070444	1100	-18.6629	0.003143	2	0.070444	200	-1.3309	171	640	NA	Yes	NA	Yes	Yes	Yes
AT1G71695	AT1G71690	1-26964000	1	26964066	26964566	+	1205	1-26948500	1	26948485	26948985	+	238	15581	11	0.070444	1100	-18.6101	0.003282	2	0.070444	200	-1.3309	1304	207	Yes	NA	NA	NA	Yes	NA
AT1G54940	AT1G54920	1-20482000	1	20482049	20482549	+	1268	1-20474500	1	20474476	20474976	+	110	7573	15	0.070444	1500	-29.7106	0	4	0.070444	400	-4.00419	906	82	Yes	NA	Yes	NA	NA	Yes
AT1G52690	AT1G52680	1-19620500	1	19620443	19620943	+	1000	1-19618500	1	19618501	19619001	+	151	1942	22	0.070444	2200	-50.8984	0	8	0.070444	800	-11.676	749	117	Yes	NA	Yes	Yes	NA	Yes
AT1G60050	AT1G60025	1-22123500	1	22123386	22123886	+	1737	1-22108000	1	22107904	22108404	+	107	15482	13	0.070444	1300	-24.1288	1.8e-05	3	0.070444	300	-2.53619	1392	82	Yes	NA	Yes	NA	NA	NA
AT3G08720	AT3G08690	3-2649000	3	2649032	2649532	+	139	3-2642000	3	2642019	2642519	+	1298	7013	13	0.070444	1300	-23.9736	2.1e-05	3	0.070444	300	-2.53585	84	1038	NA	Yes	NA	NA	Yes	Yes
AT3G09940	AT3G09930	3-3058000	3	3057879	3058379	+	108	3-3054500	3	3054336	3054836	+	1458	3543	15	0.070444	1500	-29.7277	0	4	0.070444	400	-3.99896	94	1059	NA	Yes	Yes	Yes	NA	NA
AT1G28180	AT1G28170	1-9843000	1	9843012	9843512	+	140	1-9842000	1	9841810	9842310	+	497	1202	15	0.070444	1500	-29.515	0	4	0.070444	400	-3.99858	95	376	NA	Yes	NA	NA	NA	NA
AT2G41740	AT2G41720	2-17416000	2	17416062	17416562	+	45	2-17406500	2	17406543	17407043	+	1717	9519	8	0.070444	800	-11.9993	1	1	0.070444	100	-0.448546	29	1564	NA	Yes	NA	NA	Yes	Yes
AT1G29590	AT1G29580	1-10340500	1	10340518	10341018	+	1867	1-10338500	1	10338428	10338928	+	129	2090	29	0.070444	2900	-75.4175	0	13	0.070444	1300	-24.2409	1647	92	Yes	NA	NA	NA	NA	NA
AT2G17650	AT2G17640	2-7671500	2	7671489	7671989	+	117	2-7669000	2	7669080	7669580	+	1076	2409	28	0.070444	2800	-72.1455	0	12	0.070444	1200	-21.3754	123	960	NA	Yes	NA	NA	Yes	Yes
AT2G25420	AT2G25360	2-10818000	2	10817947	10818447	+	55	2-10805500	2	10805313	10805813	+	2109	12634	8	0.070444	800	-11.9006	1	1	0.070444	100	-0.449205	31	1802	NA	Yes	NA	Yes	Yes	NA
AT1G28430	AT1G28420	1-9993500	1	9993492	9993992	+	623	1-9985500	1	9985467	9985967	+	78	8025	8	0.070444	800	-11.7738	1	1	0.070444	100	-0.449504	648	32	Yes	NA	Yes	NA	NA	Yes
AT2G25440	AT2G25360	2-10827500	2	10827471	10827971	+	87	2-10805500	2	10805337	10805837	+	2109	22134	8	0.070444	800	-11.7431	1	1	0.070444	100	-0.449504	32	1802	NA	Yes	NA	Yes	NA	NA
AT3G01930	AT3G01890	3-321000	3	320951	321451	+	135	3-311000	3	311052	311552	+	1695	9899	13	0.070444	1300	-23.9888	2.1e-05	3	0.070444	300	-2.53252	110	1426	NA	Yes	NA	NA	Yes	Yes
AT3G07000	AT3G06970	3-2209500	3	2209532	2210032	+	2127	3-2199500	3	2199505	2200005	+	160	10027	15	0.070444	1500	-29.4269	0	4	0.070444	400	-3.99172	2033	118	Yes	NA	NA	Yes	Yes	Yes
AT3G11250	AT3G11240	3-3522500	3	3522333	3522833	+	1266	3-3520000	3	3520019	3520519	+	161	2314	15	0.070444	1500	-29.4231	0	4	0.070444	400	-3.99172	1066	118	Yes	NA	Yes	NA	Yes	Yes
AT3G13160	AT3G13140	3-4230500	3	4230462	4230962	+	166	3-4227000	3	4226938	4227438	+	1405	3524	36	0.070444	3600	-100.583	0	18	0.070444	1800	-38.6242	113	1158	NA	Yes	NA	NA	Yes	NA
AT1G71160	AT1G71140	1-26830000	1	26829858	26830358	+	971	1-26825000	1	26824998	26825498	+	65	4860	8	0.070444	800	-11.8338	1	1	0.070444	100	-0.450048	885	34	Yes	NA	NA	NA	Yes	NA
AT2G35630	AT2G35620	2-14969500	2	14969412	14969912	+	40	2-14964500	2	14964620	14965120	+	1745	4792	8	0.070444	800	-12.0688	1	1	0.070444	100	-0.450048	34	1865	NA	Yes	NA	NA	Yes	Yes
AT2G34370	AT2G34357	2-14511500	2	14511366	14511866	+	1651	2-14504500	2	14504525	14505025	+	143	6841	13	0.070444	1300	-23.9593	2.1e-05	3	0.070444	300	-2.53172	1316	119	Yes	NA	NA	NA	NA	Yes
AT1G30170	AT1G30120	1-10609000	1	10608947	10609447	+	1772	1-10585000	1	10585080	10585580	+	59	23867	8	0.070444	800	-11.871	1	1	0.070444	100	-0.450296	1387	35	Yes	NA	NA	NA	NA	Yes
AT1G57760	AT1G57750	1-21390500	1	21390431	21390931	+	38	1-21385500	1	21385477	21385977	+	1073	4954	8	0.070444	800	-12.1022	1	1	0.070444	100	-0.450296	35	879	NA	Yes	NA	NA	NA	NA
AT1G58050	AT1G58037	1-21485500	1	21485406	21485906	+	81	1-21474000	1	21473996	21474496	+	904	11410	8	0.070444	800	-11.7628	1	1	0.070444	100	-0.450296	35	606	NA	Yes	NA	Yes	NA	NA
AT1G58050	AT1G58037	1-21485500	1	21485464	21485964	+	81	1-21474500	1	21474463	21474963	+	1236	11001	8	0.070444	800	-11.7628	1	1	0.070444	100	-0.450296	35	947	NA	Yes	NA	Yes	NA	NA
AT1G74230	AT1G74200	1-27915000	1	27915017	27915517	+	1442	1-27908000	1	27908072	27908572	+	62	6945	8	0.070444	800	-11.8515	1	1	0.070444	100	-0.450296	1322	35	Yes	NA	NA	NA	Yes	Yes
AT1G53023	AT1G53000	1-19754500	1	19754532	19755032	+	1481	1-19745000	1	19744989	19745489	+	145	9543	15	0.070444	1500	-29.4906	0	4	0.070444	400	-3.98932	1108	129	Yes	NA	Yes	NA	NA	Yes
AT1G66330	AT1G66310	1-24730500	1	24730484	24730984	+	172	1-24724500	1	24724436	24724936	+	745	6048	13	0.070444	1300	-23.8758	2.3e-05	3	0.070444	300	-2.53124	125	641	NA	Yes	NA	Yes	Yes	NA
AT2G01360	AT2G01320	2-168000	2	167983	168483	+	1564	2-156000	2	156022	156522	+	63	11961	8	0.070444	800	-11.8454	1	1	0.070444	100	-0.450531	1278	36	Yes	NA	NA	NA	NA	Yes
AT1G24220	AT1G24200	1-8579000	1	8578953	8579453	+	96	1-8572000	1	8571919	8572419	+	1584	7034	21	0.070444	2100	-48.4913	0	8	0.070444	800	-11.8927	56	1449	NA	Yes	NA	NA	NA	NA
AT3G08010	AT3G07990	3-2556000	3	2555950	2556450	+	127	3-2552000	3	2552091	2552591	+	426	3859	13	0.070444	1300	-24.0223	2e-05	3	0.070444	300	-2.53061	134	400	NA	Yes	NA	NA	Yes	Yes
AT2G19930	AT2G19910	2-8607500	2	8607431	8607931	+	75	2-8600500	2	8600530	8601030	+	852	6901	8	0.070444	800	-11.7857	1	1	0.070444	100	-0.450962	38	905	NA	Yes	NA	NA	Yes	NA
AT1G07720	AT1G07710	1-2392000	1	2391963	2392463	+	521	1-2387000	1	2387026	2387526	+	86	4937	8	0.070444	800	-11.7462	1	1	0.070444	100	-0.45153	533	41	Yes	NA	NA	NA	Yes	NA
AT1G19710	AT1G19680	1-6815500	1	6815483	6815983	+	57	1-6806000	1	6806063	6806563	+	2130	9420	8	0.070444	800	-11.8852	1	1	0.070444	100	-0.45153	41	1806	NA	Yes	NA	NA	Yes	Yes
AT1G67105	AT1G67090	1-25057500	1	25057497	25057997	+	92	1-25048500	1	25048481	25048981	+	1760	9016	8	0.070444	800	-11.7288	1	1	0.070444	100	-0.45153	41	1787	NA	Yes	NA	NA	NA	Yes
AT1G51320	AT1G51310	1-19026500	1	19026356	19026856	+	1491	1-19019000	1	19019089	19019589	+	248	7267	13	0.070444	1300	-23.7516	2.5e-05	3	0.070444	300	-2.52924	1240	159	Yes	NA	Yes	NA	NA	Yes
AT2G14520	AT2G14510	2-6183500	2	6183498	6183998	+	56	2-6174500	2	6174457	6174957	+	621	9041	8	0.070444	800	-11.8927	1	1	0.070444	100	-0.451702	42	540	NA	Yes	NA	Yes	Yes	NA
AT2G41020	AT2G40990	2-17120500	2	17120604	17121104	+	187	2-17106000	2	17106077	17106577	+	1410	14527	13	0.070444	1300	-23.8431	2.3e-05	3	0.070444	300	-2.52889	167	1127	NA	Yes	NA	NA	Yes	NA
AT1G23205	AT1G23180	1-8234000	1	8234131	8234631	+	2021	1-8216500	1	8216486	8216986	+	63	17645	8	0.070444	800	-11.8454	1	1	0.070444	100	-0.451865	1906	43	Yes	NA	NA	NA	NA	Yes
AT2G43320	AT2G43280	2-17997500	2	17997594	17998094	+	51	2-17990500	2	17990524	17991024	+	623	7070	8	0.070444	800	-11.9351	1	1	0.070444	100	-0.451865	43	693	NA	Yes	NA	NA	Yes	Yes
AT1G17950	AT1G17920	1-6178000	1	6177973	6178473	+	2019	1-6164000	1	6163952	6164452	+	44	14021	8	0.070444	800	-12.0118	1	1	0.070444	100	-0.452021	1537	44	Yes	NA	Yes	NA	NA	NA
AT1G53470	AT1G53440	1-19958500	1	19958557	19959057	+	1454	1-19949500	1	19949416	19949916	+	75	9141	8	0.070444	800	-11.7857	1	1	0.070444	100	-0.452021	1473	44	Yes	NA	NA	NA	Yes	Yes
AT1G79480	AT1G79460	1-29899000	1	29899034	29899534	+	1504	1-29891500	1	29891506	29892006	+	82	7528	8	0.070444	800	-11.7593	1	1	0.070444	100	-0.452021	1297	44	Yes	NA	NA	NA	NA	NA
AT1G04920	AT1G04890	1-1395000	1	1395058	1395558	+	992	1-1382500	1	1382505	1383005	+	57	12553	8	0.070444	800	-11.8852	1	1	0.070444	100	-0.452169	776	45	Yes	NA	NA	NA	Yes	NA
AT1G76710	AT1G76690	1-28789500	1	28789494	28789994	+	58	1-28778500	1	28778490	28778990	+	1961	11004	8	0.070444	800	-11.878	1	1	0.070444	100	-0.452312	46	2028	NA	Yes	NA	NA	Yes	Yes
AT2G15345	AT2G15318	2-6684500	2	6684400	6684900	+	76	2-6664500	2	6664590	6665090	+	1609	19810	8	0.070444	800	-11.7816	1	1	0.070444	100	-0.452312	46	1647	NA	Yes	Yes	NA	NA	NA
AT2G17785	AT2G17760	2-7728000	2	7728027	7728527	+	1289	2-7715000	2	7715009	7715509	+	67	13018	8	0.070444	800	-11.823	1	1	0.070444	100	-0.452448	1055	47	Yes	NA	NA	NA	NA	Yes
AT2G17785	AT2G17760	2-7728000	2	7728111	7728611	+	1289	2-7715500	2	7715611	7716111	+	71	12500	8	0.070444	800	-11.8033	1	1	0.070444	100	-0.452448	1055	47	Yes	NA	NA	NA	NA	Yes
AT1G63680	AT1G63660	1-23615000	1	23614987	23615487	+	1261	1-23604500	1	23604489	23604989	+	97	10498	8	0.070444	800	-11.716	1	1	0.070444	100	-0.452578	1100	48	Yes	NA	NA	NA	Yes	NA
AT2G26940	AT2G26910	2-11496500	2	11496510	11497010	+	1551	2-11486500	2	11486461	11486961	+	73	10049	8	0.070444	800	-11.7942	1	1	0.070444	100	-0.452578	1108	48	Yes	NA	Yes	NA	NA	Yes
AT1G02340	AT1G02310	1-466000	1	465954	466454	+	54	1-459500	1	459590	460090	+	988	6364	8	0.070444	800	-11.9087	1	1	0.070444	100	-0.452703	49	917	NA	Yes	NA	NA	Yes	NA
AT1G10520	AT1G10480	1-3466500	1	3466551	3467051	+	87	1-3449500	1	3449586	3450086	+	1457	16965	8	0.070444	800	-11.7431	1	1	0.070444	100	-0.452824	50	1324	NA	Yes	NA	NA	NA	NA
AT1G48420	AT1G48400	1-17897000	1	17896987	17897487	+	81	1-17883500	1	17883655	17884155	+	1020	13332	8	0.070444	800	-11.7628	1	1	0.070444	100	-0.452824	50	738	NA	Yes	NA	NA	Yes	NA
AT3G01326	AT3G01320	3-115500	3	115375	115875	+	824	3-107500	3	107620	108120	+	83	7755	8	0.070444	800	-11.7559	1	1	0.070444	100	-0.452824	692	50	Yes	NA	Yes	NA	NA	NA
AT1G11540	AT1G11490	1-3876500	1	3876473	3876973	+	232	1-3869500	1	3869465	3869965	+	1572	7008	15	0.070444	1500	-29.2387	0	4	0.070444	400	-3.97999	203	1048	NA	Yes	NA	NA	Yes	NA
AT1G18870	AT1G18835	1-6518500	1	6518588	6519088	+	95	1-6496000	1	6495970	6496470	+	1447	22618	8	0.070444	800	-11.7209	1	1	0.070444	100	-0.452939	51	1297	NA	Yes	NA	NA	NA	NA
AT1G48540	AT1G48530	1-17946500	1	17946520	17947020	+	50	1-17943500	1	17943500	17944000	+	758	3020	8	0.070444	800	-11.9446	1	1	0.070444	100	-0.452939	51	555	NA	Yes	NA	NA	Yes	NA
AT1G58450	AT1G58420	1-21718000	1	21718080	21718580	+	1495	1-21707500	1	21707526	21708026	+	260	10554	13	0.070444	1300	-23.7387	2.6e-05	3	0.070444	300	-2.52669	1160	244	Yes	NA	Yes	NA	NA	Yes
AT1G63900	AT1G63855	1-23717000	1	23716938	23717438	+	1630	1-23700500	1	23700407	23700907	+	86	16531	8	0.070444	800	-11.7462	1	1	0.070444	100	-0.453156	1562	53	Yes	NA	NA	NA	Yes	Yes
AT1G69710	AT1G69660	1-26224000	1	26223908	26224408	+	109	1-26200000	1	26199896	26200396	+	1815	24012	8	0.070444	800	-11.6902	1	1	0.070444	100	-0.453156	53	1333	NA	Yes	NA	Yes	NA	NA
AT1G12000	AT1G11990	1-4051000	1	4051026	4051526	+	185	1-4048500	1	4048445	4048945	+	1579	2581	41	0.070444	4100	-119.593	0	22	0.070444	2200	-51.4711	111	1420	NA	Yes	NA	Yes	Yes	NA
AT1G54940	AT1G54890	1-20482000	1	20482005	20482505	+	1268	1-20463000	1	20462924	20463424	+	58	19081	8	0.070444	800	-11.878	1	1	0.070444	100	-0.453358	906	55	Yes	NA	Yes	NA	NA	NA
AT2G30380	AT2G30350	2-12948000	2	12947974	12948474	+	95	2-12934500	2	12934500	12935000	+	916	13474	8	0.070444	800	-11.7209	1	1	0.070444	100	-0.453454	56	772	NA	Yes	NA	NA	NA	Yes
AT1G05800	AT1G05785	1-1742000	1	1741985	1742485	+	113	1-1730500	1	1730712	1731212	+	1408	11273	8	0.070444	800	-11.6828	1	1	0.070444	100	-0.453546	57	1262	NA	Yes	NA	NA	NA	Yes
AT1G16330	AT1G16300	1-5586500	1	5586501	5587001	+	81	1-5575000	1	5574877	5575377	+	1773	11624	8	0.070444	800	-11.7628	1	1	0.070444	100	-0.453546	57	1501	NA	Yes	NA	NA	NA	NA
AT2G01210	AT2G01170	2-121500	2	121388	121888	+	1471	2-104000	2	104009	104509	+	78	17379	8	0.070444	800	-11.7738	1	1	0.070444	100	-0.453546	1313	57	Yes	NA	NA	NA	Yes	Yes
AT2G34555	AT2G34490	2-14557500	2	14557583	14558083	+	1920	2-14537000	2	14536907	14537407	+	101	20676	8	0.070444	800	-11.7067	1	1	0.070444	100	-0.453634	1908	58	Yes	NA	NA	NA	Yes	Yes
AT3G02130	AT3G02110	3-382500	3	382475	382975	+	91	3-373500	3	373377	373877	+	979	9098	8	0.070444	800	-11.7315	1	1	0.070444	100	-0.453634	58	855	NA	Yes	NA	NA	Yes	Yes
AT2G35270	AT2G35240	2-14857500	2	14857433	14857933	+	1455	2-14845500	2	14845527	14846027	+	85	11906	8	0.070444	800	-11.7494	1	1	0.070444	100	-0.45372	955	59	Yes	NA	Yes	NA	Yes	Yes
AT1G72460	AT1G72450	1-27280000	1	27280006	27280506	+	101	1-27276000	1	27276002	27276502	+	1090	4004	8	0.070444	800	-11.7067	1	1	0.070444	100	-0.453803	60	1161	NA	Yes	NA	NA	Yes	Yes
AT1G61970	AT1G61950	1-22905000	1	22904980	22905480	+	94	1-22900000	1	22900092	22900592	+	922	4888	8	0.070444	800	-11.7235	1	1	0.070444	100	-0.453883	61	617	NA	Yes	NA	NA	Yes	Yes
AT2G05160	AT2G05140	2-1860500	2	1860477	1860977	+	73	2-1853500	2	1853526	1854026	+	666	6951	8	0.070444	800	-11.7942	1	1	0.070444	100	-0.453883	61	476	NA	Yes	NA	NA	Yes	NA
AT1G67480	AT1G67455	1-25278000	1	25277943	25278443	+	89	1-25268500	1	25268312	25268812	+	857	9631	8	0.070444	800	-11.7372	1	1	0.070444	100	-0.454036	63	600	NA	Yes	NA	Yes	Yes	NA
AT1G05320	AT1G05290	1-1554000	1	1554060	1554560	+	1713	1-1539000	1	1538894	1539394	+	86	15166	8	0.070444	800	-11.7462	1	1	0.070444	100	-0.454109	1365	64	Yes	NA	NA	Yes	Yes	NA
AT1G52440	AT1G52420	1-19540000	1	19539921	19540421	+	674	1-19530000	1	19530028	19530528	+	91	9893	8	0.070444	800	-11.7315	1	1	0.070444	100	-0.45418	548	65	Yes	NA	Yes	NA	NA	Yes
AT2G43900	AT2G43850	2-18182500	2	18182437	18182937	+	83	2-18162000	2	18161869	18162369	+	1523	20568	8	0.070444	800	-11.7559	1	1	0.070444	100	-0.45418	65	1824	NA	Yes	NA	NA	Yes	Yes
AT1G47389	AT1G47350	1-17378500	1	17378516	17379016	+	1808	1-17359000	1	17359117	17359617	+	81	19399	8	0.070444	800	-11.7628	1	1	0.070444	100	-0.454248	1725	66	Yes	NA	Yes	NA	NA	NA
AT1G52490	AT1G52450	1-19556500	1	19556464	19556964	+	1032	1-19544500	1	19544499	19544999	+	143	11965	8	0.070444	800	-11.6411	1	1	0.070444	100	-0.454248	789	66	Yes	NA	Yes	NA	NA	NA
AT1G18900	AT1G18880	1-6530000	1	6530028	6530528	+	89	1-6521000	1	6521135	6521635	+	638	8893	8	0.070444	800	-11.7372	1	1	0.070444	100	-0.454314	67	581	NA	Yes	NA	NA	Yes	NA
AT1G45000	AT1G44970	1-17011000	1	17011046	17011546	+	73	1-17003000	1	17003080	17003580	+	628	7966	8	0.070444	800	-11.7942	1	1	0.070444	100	-0.454314	67	488	NA	Yes	NA	NA	Yes	NA
AT2G01970	AT2G01950	2-454500	2	454478	454978	+	84	2-444000	2	443904	444404	+	1231	10574	21	0.070444	2100	-48.8321	0	8	0.070444	800	-11.8454	63	1206	NA	Yes	NA	NA	Yes	Yes
AT2G34290	AT2G34260	2-14473000	2	14472817	14473317	+	346	2-14468000	2	14468008	14468508	+	105	4809	8	0.070444	800	-11.6981	1	1	0.070444	100	-0.454379	319	68	NA	NA	NA	NA	NA	Yes
AT1G64280	AT1G64255	1-23853500	1	23853477	23853977	+	110	1-23846500	1	23846634	23847134	+	795	6843	8	0.070444	800	-11.6883	1	1	0.070444	100	-0.454441	69	556	NA	Yes	NA	NA	NA	NA
AT1G71010	AT1G71002	1-26787500	1	26787538	26788038	+	91	1-26773500	1	26773592	26774092	+	1435	13946	8	0.070444	800	-11.7315	1	1	0.070444	100	-0.454561	71	1542	NA	Yes	NA	NA	Yes	NA
AT1G67455	AT1G67430	1-25268000	1	25268009	25268509	+	1083	1-25263000	1	25262881	25263381	+	75	5128	8	0.070444	800	-11.7857	1	1	0.070444	100	-0.454618	1053	72	Yes	NA	Yes	NA	NA	NA
AT1G77250	AT1G77210	1-29022000	1	29022077	29022577	+	1656	1-29010500	1	29010456	29010956	+	89	11621	8	0.070444	800	-11.7372	1	1	0.070444	100	-0.454618	1410	72	Yes	NA	NA	NA	Yes	Yes
AT1G34180	AT1G34160	1-12450000	1	12449992	12450492	+	550	1-12441500	1	12441525	12442025	+	81	8467	8	0.070444	800	-11.7628	1	1	0.070444	100	-0.454674	463	73	Yes	NA	NA	NA	Yes	NA
AT1G70970	AT1G70944	1-26761000	1	26760976	26761476	+	95	1-26749000	1	26749032	26749532	+	1598	11944	8	0.070444	800	-11.7209	1	1	0.070444	100	-0.454728	74	1776	NA	Yes	NA	NA	NA	NA
AT2G23290	AT2G23240	2-9904500	2	9904557	9905057	+	89	2-9895500	2	9895626	9896126	+	769	8931	8	0.070444	800	-11.7372	1	1	0.070444	100	-0.454728	74	743	NA	Yes	NA	Yes	Yes	NA
AT3G09680	AT3G09670	3-2969000	3	2969217	2969717	+	806	3-2968500	3	2968408	2968908	+	144	809	20	0.070444	2000	-44.5411	0	7	0.070444	700	-9.53054	650	115	Yes	NA	NA	NA	NA	Yes
AT3G06390	AT3G06330	3-1939000	3	1939018	1939518	+	1625	3-1918500	3	1918438	1918938	+	87	20580	8	0.070444	800	-11.7431	1	1	0.070444	100	-0.454781	1504	75	Yes	NA	NA	NA	NA	Yes
AT1G05790	AT1G05750	1-1733500	1	1733613	1734113	+	90	1-1722000	1	1722067	1722567	+	2087	11546	8	0.070444	800	-11.7343	1	1	0.070444	100	-0.454833	76	1644	NA	Yes	NA	NA	Yes	Yes
AT1G68400	AT1G68380	1-25648500	1	25648414	25648914	+	876	1-25637000	1	25636903	25637403	+	102	11511	8	0.070444	800	-11.7045	1	1	0.070444	100	-0.454833	823	76	Yes	NA	NA	Yes	NA	NA
AT3G01810	AT3G01760	3-291500	3	291581	292081	+	157	3-274000	3	273995	274495	+	1456	17586	8	0.070444	800	-11.6272	1	1	0.070444	100	-0.454833	76	1185	NA	Yes	NA	NA	Yes	NA
AT1G55590	AT1G55580	1-20770500	1	20770675	20771175	+	1232	1-20765000	1	20765047	20765547	+	103	5628	8	0.070444	800	-11.7023	1	1	0.070444	100	-0.454931	802	78	Yes	NA	Yes	NA	Yes	Yes
AT3G16460	AT3G16430	3-5593500	3	5593607	5594107	+	100	3-5582500	3	5582609	5583109	+	1216	10998	8	0.070444	800	-11.7089	1	1	0.070444	100	-0.455115	82	920	NA	Yes	NA	Yes	Yes	Yes
AT1G66340	AT1G66310	1-24735500	1	24735479	24735979	+	120	1-24724000	1	24723932	24724432	+	2073	11547	8	0.070444	800	-11.6712	1	1	0.070444	100	-0.455158	83	1659	NA	Yes	NA	Yes	Yes	NA
AT1G68100	AT1G68060	1-25521500	1	25521601	25522101	+	840	1-25514000	1	25514001	25514501	+	78	7600	8	0.070444	800	-11.7738	1	1	0.070444	100	-0.455158	863	83	Yes	NA	NA	NA	Yes	Yes
AT2G34710	AT2G34680	2-14640000	2	14639970	14640470	+	100	2-14628500	2	14628366	14628866	+	1061	11604	8	0.070444	800	-11.7089	1	1	0.070444	100	-0.455158	83	822	NA	Yes	NA	NA	Yes	NA
AT1G64940	AT1G64920	1-24123500	1	24123464	24123964	+	75	1-24117500	1	24117644	24118144	+	1074	5820	8	0.070444	800	-11.7857	1	1	0.070444	100	-0.455241	85	890	NA	Yes	NA	NA	NA	NA
AT2G32000	AT2G31985	2-13617000	2	13616937	13617437	+	176	2-13613500	2	13613583	13614083	+	1564	3354	41	0.070444	4100	-119.849	0	22	0.070444	2200	-51.2106	126	1376	Yes	NA	NA	NA	Yes	Yes
AT1G26515	AT1G26480	1-9162500	1	9162463	9162963	+	93	1-9157500	1	9157532	9158032	+	750	4931	8	0.070444	800	-11.7261	1	1	0.070444	100	-0.45532	87	814	NA	Yes	NA	NA	NA	Yes
AT1G77280	AT1G77260	1-29033500	1	29033589	29034089	+	960	1-29025500	1	29025492	29025992	+	134	8097	8	0.070444	800	-11.6516	1	1	0.070444	100	-0.45532	849	87	Yes	NA	NA	NA	Yes	Yes
AT3G13820	AT3G13800	3-4550000	3	4549998	4550498	+	772	3-4540500	3	4540504	4541004	+	112	9494	8	0.070444	800	-11.6846	1	1	0.070444	100	-0.45532	633	87	Yes	NA	NA	NA	NA	Yes
AT2G45420	AT2G45410	2-18719500	2	18719525	18720025	+	481	2-18712500	2	18712552	18713052	+	122	6973	8	0.070444	800	-11.6681	1	1	0.070444	100	-0.455358	489	88	Yes	NA	NA	NA	NA	NA
AT2G41340	AT2G41310	2-17228500	2	17228573	17229073	+	1076	2-17222000	2	17221933	17222433	+	113	6640	8	0.070444	800	-11.6828	1	1	0.070444	100	-0.455396	1114	89	Yes	NA	NA	NA	Yes	Yes
AT1G02250	AT1G02230	1-437500	1	437587	438087	+	890	1-435000	1	434966	435466	+	91	2621	8	0.070444	800	-11.7315	1	1	0.070444	100	-0.455503	608	92	NA	Yes	NA	NA	NA	NA
AT1G03810	AT1G03780	1-958500	1	958632	959132	+	965	1-948000	1	947969	948469	+	145	10663	8	0.070444	800	-11.6389	1	1	0.070444	100	-0.455503	665	92	Yes	NA	NA	NA	NA	NA
AT1G27070	AT1G27040	1-9398500	1	9398457	9398957	+	88	1-9389500	1	9389448	9389948	+	866	9009	8	0.070444	800	-11.7401	1	1	0.070444	100	-0.455503	92	798	NA	Yes	NA	NA	Yes	NA
AT3G11110	AT3G11080	3-3480500	3	3480444	3480944	+	640	3-3470500	3	3470550	3471050	+	100	9894	8	0.070444	800	-11.7089	1	1	0.070444	100	-0.455503	622	92	Yes	NA	NA	NA	Yes	Yes
AT2G30900	AT2G30880	2-13151000	2	13150864	13151364	+	595	2-13145500	2	13145514	13146014	+	105	5350	8	0.070444	800	-11.6981	1	1	0.070444	100	-0.455667	377	97	Yes	NA	Yes	NA	NA	Yes
AT1G11610	AT1G11600	1-3908000	1	3907875	3908375	+	144	1-3901500	1	3901652	3902152	+	456	6223	8	0.070444	800	-11.64	1	1	0.070444	100	-0.455728	99	484	NA	Yes	NA	NA	NA	NA
AT2G24510	AT2G24470	2-10404000	2	10404012	10404512	+	141	2-10396000	2	10395984	10396484	+	1374	8028	8	0.070444	800	-11.6433	1	1	0.070444	100	-0.455728	99	1198	NA	Yes	NA	Yes	NA	NA
AT1G44980	AT1G44960	1-17005500	1	17005453	17005953	+	145	1-16999000	1	16999188	16999688	+	374	6265	8	0.070444	800	-11.6389	1	1	0.070444	100	-0.455786	101	384	NA	Yes	NA	NA	NA	Yes
AT2G18410	AT2G18380	2-7991000	2	7990976	7991476	+	132	2-7984000	2	7983897	7984397	+	1309	7079	8	0.070444	800	-11.6541	1	1	0.070444	100	-0.455815	102	1115	NA	Yes	NA	Yes	Yes	NA
AT1G67090	AT1G67040	1-25048500	1	25048486	25048986	+	1760	1-25019000	1	25019090	25019590	+	166	29396	8	0.070444	800	-11.6195	1	1	0.070444	100	-0.455843	1787	103	Yes	NA	NA	NA	Yes	Yes
AT1G53690	AT1G53645	1-20042500	1	20042407	20042907	+	126	1-20028500	1	20028415	20028915	+	1870	13992	8	0.070444	800	-11.6622	1	1	0.070444	100	-0.455923	106	1957	NA	Yes	NA	NA	NA	Yes
AT2G14620	AT2G14610	2-6245500	2	6245415	6245915	+	84	2-6242000	2	6241966	6242466	+	1159	3449	16	0.070444	1600	-32.9626	0	5	0.070444	500	-5.74437	49	943	NA	Yes	NA	NA	NA	NA
AT1G51860	AT1G51840	1-19258500	1	19258549	19259049	+	149	1-19250000	1	19249983	19250483	+	1567	8566	8	0.070444	800	-11.6348	1	1	0.070444	100	-0.455949	107	1336	NA	Yes	Yes	Yes	Yes	NA
AT1G20870	AT1G20850	1-7259000	1	7258798	7259298	+	609	1-7252500	1	7252452	7252952	+	154	6346	8	0.070444	800	-11.6299	1	1	0.070444	100	-0.455974	484	108	Yes	NA	NA	NA	NA	NA
AT3G03670	AT3G03630	3-902500	3	902421	902921	+	1201	3-879000	3	878981	879481	+	140	23440	8	0.070444	800	-11.6444	1	1	0.070444	100	-0.455974	1311	108	Yes	NA	Yes	NA	NA	Yes
AT3G01327	AT3G01320	3-116000	3	115858	116358	+	1364	3-109500	3	109536	110036	+	134	6322	18	0.070444	1800	-38.4125	0	6	0.070444	600	-7.57257	1090	74	Yes	NA	Yes	NA	NA	NA
AT1G51055	AT1G51035	1-18925500	1	18925588	18926088	+	170	1-18917500	1	18917384	18917884	+	1042	8204	8	0.070444	800	-11.6164	1	1	0.070444	100	-0.456023	110	989	NA	Yes	NA	Yes	NA	NA
AT2G36810	AT2G36750	2-15426000	2	15425978	15426478	+	129	2-15411000	2	15411155	15411655	+	897	14823	8	0.070444	800	-11.6581	1	1	0.070444	100	-0.456094	113	648	NA	Yes	NA	NA	Yes	Yes
AT1G32090	AT1G32060	1-11540000	1	11539968	11540468	+	868	1-11532500	1	11532620	11533120	+	155	7348	8	0.070444	800	-11.629	1	1	0.070444	100	-0.456449	876	131	NA	NA	NA	NA	Yes	Yes
AT1G05750	AT1G05675	1-1722000	1	1722144	1722644	+	2087	1-1702500	1	1702398	1702898	+	139	19746	8	0.070444	800	-11.6456	1	1	0.070444	100	-0.456499	1644	134	Yes	NA	NA	NA	Yes	Yes
AT1G51340	AT1G51300	1-19032000	1	19031996	19032496	+	216	1-19015000	1	19014950	19015450	+	1475	17046	8	0.070444	800	-11.5887	1	1	0.070444	100	-0.456515	135	1302	NA	Yes	NA	Yes	Yes	NA
AT1G68540	AT1G68526	1-25721000	1	25720957	25721457	+	173	1-25711500	1	25711492	25711992	+	704	9465	8	0.070444	800	-11.6141	1	1	0.070444	100	-0.456607	141	814	NA	Yes	NA	NA	Yes	Yes
AT1G11410	AT1G11390	1-3842000	1	3841821	3842321	+	576	1-3837000	1	3836989	3837489	+	131	4832	8	0.070444	800	-11.6554	1	1	0.070444	100	-0.456622	406	142	Yes	NA	NA	NA	NA	Yes
AT2G31490	AT2G31480	2-13412500	2	13412443	13412943	+	160	2-13410500	2	13410394	13410894	+	1788	2049	20	0.070444	2000	-44.4095	0	7	0.070444	700	-9.50985	135	1391	NA	Yes	NA	Yes	Yes	NA
AT1G51310	AT1G51290	1-19019000	1	19019104	19019604	+	248	1-19012000	1	19012004	19012504	+	1197	7100	8	0.070444	800	-11.5756	1	1	0.070444	100	-0.456842	159	1301	NA	Yes	NA	Yes	Yes	NA
AT1G75120	AT1G75050	1-28198000	1	28198015	28198515	+	1308	1-28180500	1	28180601	28181101	+	152	17414	8	0.070444	800	-11.6318	1	1	0.070444	100	-0.456981	1254	172	Yes	NA	NA	NA	Yes	Yes
AT1G70880	AT1G70810	1-26723500	1	26723459	26723959	+	1634	1-26704000	1	26704016	26704516	+	228	19443	8	0.070444	800	-11.5833	1	1	0.070444	100	-0.457403	1471	229	Yes	NA	NA	NA	Yes	Yes
AT1G20135	AT1G20110	1-6984500	1	6984532	6985032	+	529	1-6974000	1	6973959	6974459	+	257	10573	8	0.070444	800	-11.5725	1	1	0.070444	100	-0.457572	536	264	Yes	NA	Yes	NA	NA	Yes
AT1G12160	AT1G12130	1-4127000	1	4127012	4127512	+	1008	1-4119000	1	4118966	4119466	+	344	8046	8	0.070444	800	-11.551	1	1	0.070444	100	-0.457771	977	322	Yes	NA	NA	NA	NA	Yes
AT1G23780	AT1G23730	1-8408000	1	8408146	8408646	+	307	1-8395500	1	8395539	8396039	+	1215	12607	8	0.070444	800	-11.5586	1	1	0.070444	100	-0.457782	326	1358	NA	Yes	NA	Yes	Yes	NA
AT1G72125	AT1G72090	1-27135500	1	27135390	27135890	+	386	1-27123500	1	27123665	27124165	+	875	11725	8	0.070444	800	-11.5441	1	1	0.070444	100	-0.45794	396	941	Yes	NA	NA	NA	Yes	Yes
AT1G12490	AT1G12480	1-4261500	1	4261413	4261913	+	1584	1-4258000	1	4257977	4258477	+	68	3436	16	0.070444	1600	-33.3122	0	5	0.070444	500	-5.72915	1429	55	Yes	NA	NA	NA	Yes	NA
AT1G71160	AT1G71150	1-26829500	1	26829527	26830027	+	709	1-26828000	1	26827956	26828456	+	198	1571	26	0.070444	2600	-63.8166	0	11	0.070444	1100	-18.7886	425	126	Yes	NA	NA	NA	Yes	NA
AT2G41960	AT2G41930	2-17517000	2	17517044	17517544	+	117	2-17502000	2	17501944	17502444	+	1985	15100	18	0.070444	1800	-38.5777	0	6	0.070444	600	-7.54756	89	1758	NA	Yes	NA	NA	Yes	NA
AT2G20800	AT2G20780	2-8955500	2	8955391	8955891	+	2023	2-8947500	2	8947494	8947994	+	74	7897	14	0.070444	1400	-27.2636	1e-06	4	0.070444	400	-4.05072	1645	39	Yes	NA	Yes	NA	Yes	Yes
AT1G70730	AT1G70710	1-26671000	1	26670988	26671488	+	75	1-26662500	1	26662476	26662976	+	1711	8512	14	0.070444	1400	-27.2472	1e-06	4	0.070444	400	-4.04629	41	1745	NA	Yes	NA	NA	Yes	Yes
AT2G03830	AT2G03810	2-1171500	2	1171454	1171954	+	1235	2-1164000	2	1163971	1164471	+	62	7483	10	0.070444	1000	-16.636	0.022651	2	0.070444	200	-1.33106	953	27	Yes	NA	Yes	NA	NA	Yes
AT1G65360	AT1G65342	1-24281500	1	24281528	24282028	+	1875	1-24271000	1	24271143	24271643	+	161	10385	18	0.070444	1800	-38.2251	0	6	0.070444	600	-7.53521	1379	99	Yes	NA	Yes	Yes	NA	NA
AT1G24577	AT1G24570	1-8713000	1	8712827	8713327	+	1158	1-8708500	1	8708562	8709062	+	76	4265	14	0.070444	1400	-27.2313	1e-06	4	0.070444	400	-4.04044	1023	44	Yes	NA	NA	NA	NA	NA
AT2G45420	AT2G45406	2-18718500	2	18718533	18719033	+	1786	2-18710500	2	18710465	18710965	+	95	8068	14	0.070444	1400	-26.9963	1e-06	4	0.070444	400	-4.04044	1702	44	Yes	NA	NA	NA	NA	NA
AT1G71170	AT1G71160	1-26830500	1	26830495	26830995	+	175	1-26829000	1	26829038	26829538	+	1607	1457	64	0.070444	6400	-219.034	0	41	0.070444	4100	-120.275	163	1059	NA	Yes	NA	NA	Yes	Yes
AT1G17610	AT1G17600	1-6057500	1	6057393	6057893	+	751	1-6053000	1	6052928	6053428	+	385	4465	20	0.070444	2000	-43.7407	0	7	0.070444	700	-9.44199	547	321	NA	Yes	NA	NA	NA	Yes
AT1G11420	AT1G11410	1-3846000	1	3845972	3846472	+	119	1-3841500	1	3841572	3842072	+	1299	4400	21	0.070444	2100	-48.0445	0	8	0.070444	800	-11.7343	90	921	NA	Yes	NA	NA	Yes	NA
AT2G18340	AT2G18330	2-7970000	2	7970133	7970633	+	1320	2-7967000	2	7967120	7967620	+	168	3013	18	0.070444	1800	-38.1868	0	6	0.070444	600	-7.51052	1155	128	Yes	NA	NA	NA	Yes	Yes
AT2G27010	AT2G26990	2-11527000	2	11527045	11527545	+	1358	2-11521500	2	11521487	11521987	+	151	5558	18	0.070444	1800	-38.2863	0	6	0.070444	600	-7.50923	1223	130	Yes	NA	NA	NA	NA	Yes
AT2G39410	AT2G39400	2-16456000	2	16456106	16456606	+	1591	2-16452500	2	16452522	16453022	+	168	3584	26	0.070444	2600	-64.1181	0	11	0.070444	1100	-18.6833	1216	174	Yes	NA	Yes	NA	NA	Yes
AT2G42860	AT2G42850	2-17834000	2	17834019	17834519	+	217	2-17832500	2	17832409	17832909	+	1574	1610	37	0.070444	3700	-103.397	0	19	0.070444	1900	-41.2978	159	1007	NA	Yes	NA	NA	Yes	NA
AT1G23810	AT1G23790	1-8417000	1	8417027	8417527	+	178	1-8410500	1	8410383	8410883	+	783	6644	18	0.070444	1800	-38.1374	0	6	0.070444	600	-7.50174	143	769	NA	Yes	NA	NA	NA	NA
AT1G79310	AT1G79280	1-29834000	1	29833872	29834372	+	1352	1-29832000	1	29832013	29832513	+	70	1859	15	0.070444	1500	-30.2556	0	5	0.070444	500	-5.87365	1307	26	Yes	NA	NA	NA	Yes	Yes
AT1G68100	AT1G68080	1-25522000	1	25521943	25522443	+	679	1-25517500	1	25517500	25518000	+	79	4443	14	0.070444	1400	-27.1861	1e-06	4	0.070444	400	-4.02825	702	52	Yes	NA	NA	NA	Yes	Yes
AT2G17430	AT2G17410	2-7568000	2	7568096	7568596	+	1675	2-7563000	2	7562963	7563463	+	190	5133	18	0.070444	1800	-38.0853	0	6	0.070444	600	-7.49142	1324	166	Yes	NA	NA	NA	Yes	Yes
AT2G20815	AT2G20805	2-8960000	2	8959936	8960436	+	111	2-8956000	2	8956127	8956627	+	853	3809	16	0.070444	1600	-32.6149	0	5	0.070444	500	-5.68523	86	724	NA	NA	NA	Yes	NA	NA
AT1G30240	AT1G30220	1-10641000	1	10641000	10641500	+	126	1-10634500	1	10634441	10634941	+	1999	6559	16	0.070444	1600	-32.4894	0	5	0.070444	500	-5.68435	87	1729	NA	Yes	NA	NA	Yes	NA
AT1G51190	AT1G51172	1-18978000	1	18978061	18978561	+	1417	1-18963000	1	18962961	18963461	+	120	15100	10	0.070444	1000	-16.3232	0.029039	2	0.070444	200	-1.33098	1154	38	Yes	NA	Yes	NA	NA	NA
AT2G44510	AT2G44490	2-18377500	2	18377478	18377978	+	82	2-18365500	2	18365407	18365907	+	1775	12071	14	0.070444	1400	-27.1445	1e-06	4	0.070444	400	-4.02462	55	1783	NA	Yes	NA	NA	Yes	Yes
AT2G15620	AT2G15590	2-6811500	2	6811497	6811997	+	66	2-6802000	2	6801956	6802456	+	999	9541	10	0.070444	1000	-16.5956	0.023505	2	0.070444	200	-1.33097	40	867	NA	Yes	NA	Yes	Yes	NA
AT1G44980	AT1G44970	1-17005000	1	17004948	17005448	+	80	1-17003000	1	17003134	17003634	+	628	1814	14	0.070444	1400	-27.1719	1e-06	4	0.070444	400	-4.02038	59	488	NA	Yes	NA	NA	NA	NA
AT1G69880	AT1G69860	1-26322000	1	26321977	26322477	+	101	1-26310500	1	26310460	26310960	+	1531	11517	14	0.070444	1400	-26.9415	1e-06	4	0.070444	400	-4.02038	59	1312	NA	Yes	Yes	Yes	Yes	Yes
AT1G32080	AT1G32060	1-11539000	1	11538973	11539473	+	1838	1-11532500	1	11532642	11533142	+	155	6331	27	0.070444	2700	-67.7618	0	12	0.070444	1200	-21.3458	1683	131	Yes	NA	NA	NA	NA	Yes
AT1G72250	AT1G72220	1-27195500	1	27195489	27195989	+	58	1-27184500	1	27184687	27185187	+	1480	10802	10	0.070444	1000	-16.6823	0.021688	2	0.070444	200	-1.33096	42	1189	NA	Yes	NA	Yes	NA	Yes
AT1G78955	AT1G78950	1-29692500	1	29692373	29692873	+	1170	1-29687000	1	29686993	29687493	+	143	5380	19	0.070444	1900	-41.4165	0	7	0.070444	700	-9.62562	944	69	Yes	NA	NA	NA	Yes	Yes
AT2G27120	AT2G27100	2-11581500	2	11581658	11582158	+	1875	2-11574500	2	11574528	11575028	+	93	7130	14	0.070444	1400	-27.0162	1e-06	4	0.070444	400	-4.01847	1331	61	Yes	NA	NA	NA	Yes	Yes
AT1G07360	AT1G07340	1-2260500	1	2260472	2260972	+	316	1-2255500	1	2255362	2255862	+	1780	5110	18	0.070444	1800	-37.7824	0	6	0.070444	600	-7.46808	262	1450	NA	Yes	NA	NA	Yes	NA
AT2G16920	AT2G16900	2-7338500	2	7338616	7339116	+	1881	2-7323500	2	7323518	7324018	+	56	15098	10	0.070444	1000	-16.7082	0.021162	2	0.070444	200	-1.33095	1682	45	Yes	NA	NA	NA	Yes	Yes
AT2G44350	AT2G44300	2-18317000	2	18316988	18317488	+	50	2-18307500	2	18307494	18307994	+	1635	9494	12	0.070444	1200	-22.1285	0.000125	3	0.070444	300	-2.54829	45	1839	NA	Yes	NA	NA	Yes	Yes
AT1G50140	AT1G50120	1-18569500	1	18569485	18569985	+	68	1-18562000	1	18561950	18562450	+	1004	7535	10	0.070444	1000	-16.5773	0.023894	2	0.070444	200	-1.33095	46	999	NA	Yes	NA	NA	Yes	Yes
AT3G08500	AT3G08030	3-2577500	3	2577612	2578112	+	1652	3-2565000	3	2565076	2565576	+	97	12536	10	0.070444	1000	-16.4006	0.027534	2	0.070444	200	-1.33095	1364	46	Yes	NA	NA	NA	NA	Yes
AT2G33190	AT2G33170	2-14068000	2	14068048	14068548	+	1376	2-14057500	2	14057521	14058021	+	60	10527	12	0.070444	1200	-21.9076	0.000155	3	0.070444	300	-2.5477	1135	46	Yes	NA	NA	NA	NA	Yes
AT2G30010	AT2G29995	2-12806000	2	12806013	12806513	+	1150	2-12800000	2	12800100	12800600	+	54	5913	10	0.070444	1000	-16.7361	0.020609	2	0.070444	200	-1.33095	1356	47	Yes	NA	NA	NA	Yes	Yes
AT1G32080	AT1G32070	1-11538500	1	11538555	11539055	+	1448	1-11535500	1	11535527	11536027	+	148	3028	16	0.070444	1600	-32.3534	0	5	0.070444	500	-5.66803	1197	111	Yes	NA	NA	NA	NA	Yes
AT3G02030	AT3G02020	3-347500	3	347587	348087	+	58	3-343500	3	343422	343922	+	1975	4165	10	0.070444	1000	-16.6823	0.021688	2	0.070444	200	-1.33095	48	1702	NA	Yes	NA	NA	Yes	NA
AT2G40930	AT2G40910	2-17076500	2	17076428	17076928	+	93	2-17071000	2	17070975	17071475	+	1481	5453	14	0.070444	1400	-27.0162	1e-06	4	0.070444	400	-4.01422	66	1371	NA	Yes	NA	NA	Yes	NA
AT1G35830	AT1G35820	1-13321000	1	13321141	13321641	+	741	1-13314500	1	13314463	13314963	+	52	6678	10	0.070444	1000	-16.7663	0.020016	2	0.070444	200	-1.33094	593	49	Yes	NA	NA	NA	Yes	NA
AT1G27950	AT1G27940	1-9740500	1	9740475	9740975	+	1312	1-9737500	1	9737559	9738059	+	96	2916	17	0.070444	1700	-35.7908	0	6	0.070444	600	-7.66008	1093	47	Yes	NA	NA	NA	Yes	NA
AT1G55070	AT1G55040	1-20551500	1	20551527	20552027	+	155	1-20535000	1	20535022	20535522	+	2108	16505	16	0.070444	1600	-32.3185	0	5	0.070444	500	-5.6655	116	1986	NA	Yes	NA	NA	NA	Yes
AT1G34510	AT1G34470	1-12615500	1	12615488	12615988	+	79	1-12604500	1	12604581	12605081	+	1197	10907	10	0.070444	1000	-16.4942	0.025635	2	0.070444	200	-1.33094	50	1189	NA	Yes	Yes	NA	NA	Yes
AT3G09210	AT3G09180	3-2826500	3	2826318	2826818	+	1813	3-2819500	3	2819497	2819997	+	113	6821	16	0.070444	1600	-32.5961	0	5	0.070444	500	-5.66363	1656	120	Yes	NA	NA	NA	Yes	Yes
AT1G59620	AT1G59610	1-21902000	1	21902045	21902545	+	1503	1-21898000	1	21898116	21898616	+	92	3929	12	0.070444	1200	-21.5412	0.000218	3	0.070444	300	-2.54558	1772	50	Yes	NA	NA	NA	Yes	Yes
AT1G07430	AT1G07390	1-2282500	1	2282397	2282897	+	1167	1-2272500	1	2272445	2272945	+	82	9952	10	0.070444	1000	-16.4756	0.026018	2	0.070444	200	-1.33093	1266	54	Yes	NA	NA	NA	Yes	NA
AT1G53165	AT1G53160	1-19816500	1	19816504	19817004	+	73	1-19807500	1	19807410	19807910	+	1507	9094	10	0.070444	1000	-16.5363	0.02476	2	0.070444	200	-1.33093	54	1216	NA	Yes	NA	NA	Yes	NA
AT1G35170	AT1G35160	1-12872000	1	12872020	12872520	+	657	1-12867500	1	12867541	12868041	+	84	4479	14	0.070444	1400	-27.1185	1e-06	4	0.070444	400	-4.00993	495	72	Yes	NA	Yes	NA	NA	Yes
AT1G20760	AT1G20750	1-7209000	1	7209065	7209565	+	420	1-7204000	1	7203988	7204488	+	86	5077	10	0.070444	1000	-16.4529	0.02649	2	0.070444	200	-1.33093	543	55	Yes	NA	NA	NA	Yes	Yes
AT3G12560	AT3G12550	3-3984500	3	3984477	3984977	+	150	3-3979000	3	3978910	3979410	+	901	5567	16	0.070444	1600	-32.3431	0	5	0.070444	500	-5.65833	133	708	NA	Yes	NA	NA	Yes	NA
AT1G72450	AT1G72440	1-27276000	1	27275965	27276465	+	1090	1-27272000	1	27272087	27272587	+	58	3878	12	0.070444	1200	-21.9451	0.00015	3	0.070444	300	-2.54464	1161	52	Yes	NA	NA	NA	Yes	Yes
AT1G63780	AT1G63770	1-23666000	1	23665974	23666474	+	98	1-23663500	1	23663648	23664148	+	681	2326	22	0.070444	2200	-51.7674	0	9	0.070444	900	-14.0686	80	502	NA	Yes	NA	NA	Yes	Yes
AT2G36261	AT2G36240	2-15204000	2	15203847	15204347	+	1135	2-15196000	2	15195979	15196479	+	96	7868	14	0.070444	1400	-26.9866	1e-06	4	0.070444	400	-4.00865	821	74	NA	NA	NA	NA	NA	Yes
AT1G28020	AT1G28000	1-9769000	1	9769064	9769564	+	94	1-9757000	1	9756996	9757496	+	739	12068	10	0.070444	1000	-16.4136	0.027273	2	0.070444	200	-1.33093	57	617	NA	Yes	NA	Yes	NA	NA
AT3G04520	AT3G04490	3-1219000	3	1219055	1219555	+	1767	3-1205000	3	1204977	1205477	+	92	14078	10	0.070444	1000	-16.4227	0.027088	2	0.070444	200	-1.33093	1512	58	Yes	NA	NA	NA	Yes	Yes
AT1G53023	AT1G53010	1-19754500	1	19754566	19755066	+	1481	1-19748000	1	19747979	19748479	+	196	6587	30	0.070444	3000	-77.8195	0	14	0.070444	1400	-26.5314	1108	197	Yes	NA	Yes	NA	NA	NA
AT1G80730	AT1G80680	1-30340000	1	30340058	30340558	+	1185	1-30328000	1	30328050	30328550	+	100	12008	10	0.070444	1000	-16.3884	0.027779	2	0.070444	200	-1.33093	1125	60	Yes	NA	NA	NA	NA	Yes
AT1G61570	AT1G61563	1-22718500	1	22718562	22719062	+	261	1-22714500	1	22714631	22715131	+	1124	3931	33	0.070444	3300	-88.0162	0	16	0.070444	1600	-32.0329	256	902	NA	Yes	NA	Yes	Yes	NA
AT2G01370	AT2G01330	2-169000	2	168997	169497	+	1658	2-160500	2	160398	160898	+	126	8599	14	0.070444	1400	-26.7718	1e-06	4	0.070444	400	-4.00631	1200	78	Yes	NA	NA	NA	NA	Yes
AT1G16340	AT1G16300	1-5588000	1	5588034	5588534	+	107	1-5575000	1	5574969	5575469	+	1773	13065	10	0.070444	1000	-16.3627	0.028263	2	0.070444	200	-1.33092	61	1501	NA	Yes	NA	NA	Yes	NA
AT1G16440	AT1G16410	1-5616000	1	5615989	5616489	+	1176	1-5610500	1	5610615	5611115	+	95	5374	12	0.070444	1200	-21.5202	0.000222	3	0.070444	300	-2.54337	968	55	Yes	NA	NA	NA	Yes	NA
AT2G37960	AT2G37940	2-15886500	2	15886635	15887135	+	84	2-15877500	2	15877402	15877902	+	1410	9233	10	0.070444	1000	-16.464	0.026264	2	0.070444	200	-1.33092	62	1295	NA	Yes	NA	NA	NA	Yes
AT2G24130	AT2G24100	2-10259000	2	10259063	10259563	+	2075	2-10246000	2	10246113	10246613	+	88	12950	12	0.070444	1200	-21.5716	0.000212	3	0.070444	300	-2.54298	1502	56	Yes	NA	NA	NA	Yes	Yes
AT1G28660	AT1G28630	1-10072500	1	10072460	10072960	+	82	1-10062500	1	10062505	10063005	+	1196	9955	10	0.070444	1000	-16.4756	0.026018	2	0.070444	200	-1.33092	64	1098	NA	Yes	NA	Yes	Yes	NA
AT1G55600	AT1G55590	1-20776000	1	20775991	20776491	+	100	1-20771000	1	20771031	20771531	+	1452	4960	10	0.070444	1000	-16.3884	0.027779	2	0.070444	200	-1.33092	64	1204	NA	Yes	Yes	Yes	NA	Yes
AT2G37678	AT2G37650	2-15801500	2	15801533	15802033	+	886	2-15794000	2	15793989	15794489	+	112	7544	10	0.070444	1000	-16.3464	0.028579	2	0.070444	200	-1.33092	798	64	Yes	NA	NA	NA	Yes	Yes
AT3G10845	AT3G10840	3-3395000	3	3394898	3395398	+	1681	3-3393000	3	3393075	3393575	+	63	1823	10	0.070444	1000	-16.6254	0.022876	2	0.070444	200	-1.33092	1437	64	Yes	NA	NA	NA	NA	Yes
AT2G02560	AT2G02540	2-690000	2	689941	690441	+	85	2-684500	2	684396	684896	+	767	5545	10	0.070444	1000	-16.4584	0.026381	2	0.070444	200	-1.33092	65	636	NA	Yes	NA	Yes	Yes	NA
AT2G14710	AT2G14700	2-6299500	2	6299527	6300027	+	115	2-6294500	2	6294357	6294857	+	851	5170	14	0.070444	1400	-26.8369	1e-06	4	0.070444	400	-4.0037	83	492	NA	Yes	NA	Yes	NA	NA
AT1G33790	AT1G33770	1-12256500	1	12256476	12256976	+	1387	1-12242500	1	12242562	12243062	+	83	13914	10	0.070444	1000	-16.4697	0.026146	2	0.070444	200	-1.33092	1209	67	Yes	NA	Yes	NA	NA	Yes
AT2G34400	AT2G34370	2-14517000	2	14517086	14517586	+	96	2-14511500	2	14511351	14511851	+	1651	5735	10	0.070444	1000	-16.4048	0.027443	2	0.070444	200	-1.33092	67	1316	NA	Yes	NA	NA	Yes	NA
AT1G63680	AT1G63670	1-23615000	1	23615001	23615501	+	1261	1-23609000	1	23608963	23609463	+	111	6038	10	0.070444	1000	-16.3495	0.028518	2	0.070444	200	-1.33092	1100	69	Yes	NA	NA	NA	Yes	Yes
AT2G20875	AT2G20840	2-8983500	2	8983429	8983929	+	1373	2-8973500	2	8973544	8974044	+	108	9885	10	0.070444	1000	-16.3593	0.028328	2	0.070444	200	-1.33092	1237	69	Yes	NA	NA	NA	NA	Yes
AT2G25560	AT2G25540	2-10882500	2	10882568	10883068	+	122	2-10871000	2	10871110	10871610	+	1096	11458	10	0.070444	1000	-16.3179	0.029138	2	0.070444	200	-1.33092	70	1025	NA	Yes	NA	Yes	Yes	NA
AT1G05790	AT1G05780	1-1736500	1	1736447	1736947	+	128	1-1727000	1	1726908	1727408	+	1154	9539	10	0.070444	1000	-16.303	0.029437	2	0.070444	200	-1.33092	71	1018	NA	Yes	NA	NA	Yes	Yes
AT1G62280	AT1G62260	1-23008000	1	23007999	23008499	+	126	1-22999500	1	22999408	22999908	+	755	8591	10	0.070444	1000	-16.3078	0.02934	2	0.070444	200	-1.33092	71	718	NA	Yes	Yes	NA	NA	Yes
AT1G31600	AT1G31540	1-11313500	1	11313525	11314025	+	78	1-11293500	1	11293546	11294046	+	1905	19979	10	0.070444	1000	-16.5008	0.025503	2	0.070444	200	-1.33092	73	2000	NA	Yes	NA	Yes	Yes	Yes
AT1G09932	AT1G09930	1-3233000	1	3232886	3233386	+	1081	1-3230000	1	3229869	3230369	+	93	3017	14	0.070444	1400	-27.0162	1e-06	4	0.070444	400	-4.00096	1088	89	Yes	NA	NA	NA	Yes	Yes
AT1G24340	AT1G24330	1-8636000	1	8636063	8636563	+	965	1-8632500	1	8632568	8633068	+	142	3495	14	0.070444	1400	-26.6959	2e-06	4	0.070444	400	-4.00096	794	89	Yes	NA	NA	NA	Yes	Yes
AT1G24330	AT1G24320	1-8632500	1	8632534	8633034	+	142	1-8630500	1	8630441	8630941	+	1206	2093	19	0.070444	1900	-41.4249	0	7	0.070444	700	-9.57181	89	945	NA	Yes	NA	NA	Yes	Yes
AT1G55730	AT1G55700	1-20834000	1	20833879	20834379	+	1327	1-20822500	1	20822393	20822893	+	112	11486	10	0.070444	1000	-16.3464	0.028579	2	0.070444	200	-1.33092	1472	74	Yes	NA	NA	NA	Yes	NA
AT1G66330	AT1G66320	1-24731500	1	24731614	24732114	+	105	1-24728000	1	24728118	24728618	+	1391	3496	14	0.070444	1400	-26.9086	1e-06	4	0.070444	400	-3.99973	92	1122	NA	Yes	NA	Yes	Yes	NA
AT2G14530	AT2G14510	2-6187500	2	6187478	6187978	+	73	2-6174000	2	6174063	6174563	+	1109	13415	10	0.070444	1000	-16.5363	0.02476	2	0.070444	200	-1.33091	79	882	NA	Yes	NA	Yes	Yes	NA
AT2G44020	AT2G43980	2-18219500	2	18219317	18219817	+	1176	2-18210500	2	18210531	18211031	+	121	8786	10	0.070444	1000	-16.3205	0.029089	2	0.070444	200	-1.33091	1278	79	Yes	NA	NA	NA	Yes	Yes
AT1G34050	AT1G34046	1-12395000	1	12395004	12395504	+	127	1-12388500	1	12388476	12388976	+	664	6528	10	0.070444	1000	-16.3054	0.029386	2	0.070444	200	-1.33091	80	504	NA	Yes	NA	Yes	NA	NA
AT1G56560	AT1G56550	1-21193500	1	21193536	21194036	+	107	1-21187000	1	21187114	21187614	+	1950	6422	10	0.070444	1000	-16.3627	0.028263	2	0.070444	200	-1.33091	80	1825	NA	Yes	NA	Yes	Yes	Yes
AT1G14250	AT1G14220	1-4869000	1	4868934	4869434	+	1208	1-4859500	1	4859575	4860075	+	93	9359	10	0.070444	1000	-16.4181	0.027183	2	0.070444	200	-1.33091	1186	83	Yes	NA	NA	NA	NA	NA
AT2G28010	AT2G28000	2-11930500	2	11930642	11931142	+	1186	2-11926000	2	11926147	11926647	+	99	4495	10	0.070444	1000	-16.3924	0.027699	2	0.070444	200	-1.33091	754	88	Yes	NA	NA	NA	NA	Yes
AT3G10000	AT3G09980	3-3076500	3	3076670	3077170	+	767	3-3071000	3	3070993	3071493	+	109	5677	10	0.070444	1000	-16.356	0.028387	2	0.070444	200	-1.33091	816	88	Yes	NA	Yes	NA	NA	Yes
AT1G21590	AT1G21580	1-7568500	1	7568605	7569105	+	1383	1-7564000	1	7563947	7564447	+	91	4658	12	0.070444	1200	-21.5486	0.000216	3	0.070444	300	-2.53893	1407	69	Yes	NA	NA	NA	Yes	Yes
AT1G66310	AT1G66250	1-24724000	1	24723945	24724445	+	2073	1-24694000	1	24694014	24694514	+	139	29931	10	0.070444	1000	-16.2792	0.029911	2	0.070444	200	-1.33091	1659	95	Yes	NA	Yes	NA	NA	Yes
AT1G04470	AT1G04440	1-1213500	1	1213403	1213903	+	1084	1-1202500	1	1202484	1202984	+	77	10919	12	0.070444	1200	-21.6726	0.000194	3	0.070444	300	-2.53844	917	71	Yes	NA	NA	NA	NA	Yes
AT1G63100	AT1G63070	1-23400500	1	23400421	23400921	+	131	1-23386500	1	23386619	23387119	+	827	13802	10	0.070444	1000	-16.2961	0.029574	2	0.070444	200	-1.33091	98	662	NA	Yes	NA	Yes	NA	NA
AT1G70260	AT1G70250	1-26459000	1	26459006	26459506	+	125	1-26452500	1	26452651	26453151	+	452	6355	10	0.070444	1000	-16.3103	0.029295	2	0.070444	200	-1.33091	98	476	NA	Yes	NA	NA	NA	Yes
AT1G03810	AT1G03790	1-958500	1	958618	959118	+	965	1-954500	1	954577	955077	+	120	4041	10	0.070444	1000	-16.3232	0.029039	2	0.070444	200	-1.33091	665	100	Yes	NA	NA	NA	NA	NA
AT2G32610	AT2G32590	2-13836000	2	13836152	13836652	+	957	2-13831500	2	13831495	13831995	+	131	4657	10	0.070444	1000	-16.2961	0.029574	2	0.070444	200	-1.33091	941	100	Yes	NA	NA	NA	Yes	NA
AT3G01870	AT3G01820	3-305500	3	305582	306082	+	118	3-295000	3	294840	295340	+	1893	10742	10	0.070444	1000	-16.3287	0.028925	2	0.070444	200	-1.33091	101	1932	NA	Yes	NA	NA	Yes	Yes
AT3G01920	AT3G01890	3-318000	3	318024	318524	+	115	3-311000	3	311027	311527	+	1695	6997	10	0.070444	1000	-16.3373	0.028751	2	0.070444	200	-1.33091	102	1426	NA	Yes	NA	NA	Yes	Yes
AT1G12855	AT1G12840	1-4383000	1	4383013	4383513	+	609	1-4376000	1	4376042	4376542	+	106	6971	10	0.070444	1000	-16.3661	0.0282	2	0.070444	200	-1.3309	587	103	Yes	NA	NA	NA	NA	Yes
AT1G63530	AT1G63520	1-23563500	1	23563504	23564004	+	118	1-23560000	1	23559990	23560490	+	655	3514	12	0.070444	1200	-21.396	0.000245	3	0.070444	300	-2.53755	75	490	NA	Yes	NA	NA	NA	NA
AT1G29170	AT1G29150	1-10193500	1	10193596	10194096	+	981	1-10181000	1	10181022	10181522	+	125	12574	10	0.070444	1000	-16.3103	0.029295	2	0.070444	200	-1.3309	857	111	Yes	NA	NA	NA	Yes	Yes
AT1G35290	AT1G35242	1-12947500	1	12947639	12948139	+	1654	1-12931000	1	12931034	12931534	+	150	16605	10	0.070444	1000	-16.2589	0.030331	2	0.070444	200	-1.3309	1468	116	Yes	NA	Yes	NA	NA	NA
AT1G15660	AT1G15620	1-5384000	1	5384011	5384511	+	120	1-5374000	1	5373935	5374435	+	1928	10076	12	0.070444	1200	-21.3875	0.000247	3	0.070444	300	-2.53694	78	1462	NA	Yes	NA	Yes	Yes	Yes
AT1G75250	AT1G75230	1-28245000	1	28244964	28245464	+	1012	1-28235000	1	28235000	28235500	+	135	9964	10	0.070444	1000	-16.2874	0.029743	2	0.070444	200	-1.3309	814	117	Yes	NA	Yes	NA	NA	Yes
AT1G23205	AT1G23201	1-8234000	1	8234165	8234665	+	2021	1-8230500	1	8230503	8231003	+	98	3662	26	0.070444	2600	-65.6208	0	12	0.070444	1200	-21.6231	1906	82	Yes	NA	NA	NA	NA	NA
AT2G21940	AT2G21930	2-9351500	2	9351468	9351968	+	105	2-9347500	2	9347544	9348044	+	1424	3924	12	0.070444	1200	-21.4592	0.000233	3	0.070444	300	-2.53674	79	1220	NA	NA	NA	Yes	Yes	NA
AT1G50680	AT1G50670	1-18778500	1	18778291	18778791	+	416	1-18776500	1	18776577	18777077	+	92	1714	14	0.070444	1400	-27.0265	1e-06	4	0.070444	400	-3.99103	275	121	Yes	NA	NA	NA	Yes	Yes
AT1G12570	AT1G12550	1-4278000	1	4277929	4278429	+	91	1-4275500	1	4275305	4275805	+	773	2624	12	0.070444	1200	-21.5486	0.000216	3	0.070444	300	-2.53656	80	577	NA	Yes	NA	NA	NA	Yes
AT2G34360	AT2G34357	2-14507000	2	14507199	14507699	+	835	2-14500000	2	14499997	14500497	+	161	7202	12	0.070444	1200	-21.2618	0.000273	3	0.070444	300	-2.53656	670	80	Yes	NA	NA	NA	Yes	Yes
AT1G61710	AT1G61690	1-22790000	1	22789969	22790469	+	614	1-22783000	1	22783028	22783528	+	178	6941	12	0.070444	1200	-21.227	0.000281	3	0.070444	300	-2.53602	435	83	Yes	NA	Yes	Yes	NA	Yes
AT1G14180	AT1G14170	1-4848000	1	4848065	4848565	+	1021	1-4845500	1	4845465	4845965	+	100	2600	14	0.070444	1400	-26.9501	1e-06	4	0.070444	400	-3.98952	757	128	Yes	NA	NA	NA	Yes	Yes
AT1G70140	AT1G70100	1-26414500	1	26414660	26415160	+	1774	1-26403500	1	26403543	26404043	+	132	11117	10	0.070444	1000	-16.2939	0.02962	2	0.070444	200	-1.3309	1823	135	Yes	NA	NA	NA	Yes	Yes
AT1G09483	AT1G09450	1-3061000	1	3061031	3061531	+	1906	1-3050500	1	3050522	3051022	+	111	10509	17	0.070444	1700	-35.5982	0	6	0.070444	600	-7.60769	1714	60	Yes	NA	Yes	NA	NA	NA
AT1G65690	AT1G65660	1-24432500	1	24432393	24432893	+	1714	1-24418500	1	24418510	24419010	+	165	13883	10	0.070444	1000	-16.2357	0.030816	2	0.070444	200	-1.3309	1560	138	Yes	NA	Yes	NA	Yes	Yes
AT2G29060	AT2G29040	2-12483000	2	12482946	12483446	+	947	2-12473500	2	12473552	12474052	+	230	9394	10	0.070444	1000	-16.1708	0.03234	2	0.070444	200	-1.3309	710	139	Yes	NA	NA	NA	Yes	NA
AT1G71680	AT1G71520	1-26945500	1	26945386	26945886	+	1583	1-26938500	1	26938512	26939012	+	79	6874	12	0.070444	1200	-21.652	0.000197	3	0.070444	300	-2.53568	1187	85	Yes	NA	NA	NA	NA	Yes
AT2G29800	AT2G29760	2-12723000	2	12722995	12723495	+	109	2-12713500	2	12713421	12713921	+	1822	9574	12	0.070444	1200	-21.4381	0.000237	3	0.070444	300	-2.53552	86	1604	NA	Yes	NA	NA	NA	NA
AT1G51310	AT1G51260	1-19019000	1	19019092	19019592	+	248	1-19005000	1	19004972	19005472	+	1448	14120	10	0.070444	1000	-16.159	0.032649	2	0.070444	200	-1.3309	159	1088	NA	Yes	NA	Yes	Yes	NA
AT2G27400	AT2G27385	2-11722000	2	11722014	11722514	+	126	2-11716500	2	11716627	11717127	+	1463	5387	22	0.070444	2200	-51.2106	0	9	0.070444	900	-13.9771	105	1330	NA	Yes	NA	NA	Yes	Yes
AT1G53025	AT1G53010	1-19758500	1	19758486	19758986	+	1808	1-19747500	1	19747413	19747913	+	91	11073	12	0.070444	1200	-21.5486	0.000216	3	0.070444	300	-2.53462	1522	92	Yes	NA	Yes	NA	Yes	NA
AT1G64660	AT1G64650	1-24029000	1	24028991	24029491	+	1907	1-24025000	1	24024989	24025489	+	177	4002	12	0.070444	1200	-21.2289	0.00028	3	0.070444	300	-2.53462	1738	92	Yes	NA	NA	NA	Yes	Yes
AT3G12750	AT3G12730	3-4052500	3	4052480	4052980	+	155	3-4048000	3	4048092	4048592	+	1040	4388	19	0.070444	1900	-41.325	0	7	0.070444	700	-9.52933	116	1033	NA	Yes	NA	NA	NA	NA
AT1G49952	AT1G49910	1-18493000	1	18493022	18493522	+	104	1-18479000	1	18479109	18479609	+	1721	13913	12	0.070444	1200	-21.4648	0.000232	3	0.070444	300	-2.53422	95	1754	NA	Yes	NA	NA	NA	NA
AT3G08510	AT3G08500	3-2583000	3	2582997	2583497	+	127	3-2578000	3	2577888	2578388	+	1717	5109	12	0.070444	1200	-21.3601	0.000252	3	0.070444	300	-2.53409	96	1424	NA	Yes	NA	NA	Yes	NA
AT1G49290	AT1G49250	1-18233000	1	18232980	18233480	+	238	1-18221000	1	18220973	18221473	+	1367	12007	10	0.070444	1000	-16.1653	0.032482	2	0.070444	200	-1.3309	204	911	NA	Yes	NA	Yes	NA	NA
AT1G20860	AT1G20850	1-7257500	1	7257630	7258130	+	950	1-7252000	1	7252104	7252604	+	125	5526	12	0.070444	1200	-21.3676	0.000251	3	0.070444	300	-2.53348	787	101	Yes	NA	NA	NA	NA	NA
AT1G79640	AT1G79630	1-29968500	1	29968525	29969025	+	73	1-29965500	1	29965385	29965885	+	1157	3140	15	0.070444	1500	-30.1922	0	5	0.070444	500	-5.77623	40	1318	NA	Yes	NA	NA	Yes	Yes
AT1G21395	AT1G21390	1-7492000	1	7491975	7492475	+	809	1-7489000	1	7489062	7489562	+	99	2913	12	0.070444	1200	-21.4943	0.000226	3	0.070444	300	-2.53325	828	103	Yes	NA	NA	NA	NA	Yes
AT2G38880	AT2G38840	2-16240000	2	16240014	16240514	+	297	2-16229000	2	16228889	16229389	+	981	11125	10	0.070444	1000	-16.134	0.033329	2	0.070444	200	-1.33089	277	774	NA	Yes	NA	NA	Yes	Yes
AT1G25320	AT1G25290	1-8878500	1	8878496	8878996	+	1985	1-8867500	1	8867394	8867894	+	119	11102	12	0.070444	1200	-21.3917	0.000246	3	0.070444	300	-2.53243	1470	111	Yes	NA	Yes	NA	Yes	Yes
AT1G55960	AT1G55950	1-20929000	1	20928910	20929410	+	969	1-20927000	1	20926946	20927446	+	181	1964	19	0.070444	1900	-41.1702	0	7	0.070444	700	-9.50985	922	135	Yes	NA	NA	NA	Yes	NA
AT2G35860	AT2G35830	2-15062000	2	15062078	15062578	+	147	2-15053000	2	15052907	15053407	+	1748	9171	12	0.070444	1200	-21.2966	0.000265	3	0.070444	300	-2.53074	132	1903	NA	Yes	NA	NA	NA	Yes
AT3G04590	AT3G04550	3-1240000	3	1240008	1240508	+	159	3-1226500	3	1226498	1226998	+	1825	13510	12	0.070444	1200	-21.2663	0.000272	3	0.070444	300	-2.53074	132	1770	NA	Yes	NA	NA	Yes	NA
AT1G34418	AT1G34410	1-12582500	1	12582454	12582954	+	1113	1-12580500	1	12580374	12580874	+	62	2080	13	0.070444	1300	-24.6425	1.1e-05	4	0.070444	400	-4.08715	942	28	NA	NA	NA	NA	Yes	NA
AT2G31550	AT2G31530	2-13434500	2	13434424	13434924	+	1273	2-13430000	2	13430012	13430512	+	192	4412	28	0.070444	2800	-70.7862	0	13	0.070444	1300	-23.8984	1215	163	Yes	NA	NA	NA	NA	Yes
AT3G04560	AT3G04520	3-1228500	3	1228506	1229006	+	222	3-1219000	3	1219087	1219587	+	1767	9419	14	0.070444	1400	-26.4843	2e-06	4	0.070444	400	-3.97722	245	1512	NA	Yes	Yes	NA	Yes	Yes
AT2G04500	AT2G04495	2-1568500	2	1568517	1569017	+	106	2-1564500	2	1564589	1565089	+	1645	3928	31	0.070444	3100	-83.6616	0	16	0.070444	1600	-32.9982	82	1343	NA	Yes	NA	Yes	NA	Yes
AT1G51890	AT1G51880	1-19278000	1	19277896	19278396	+	821	1-19271000	1	19270995	19271495	+	176	6901	12	0.070444	1200	-21.2308	0.00028	3	0.070444	300	-2.53018	781	141	Yes	NA	Yes	Yes	NA	NA
AT1G59660	AT1G59650	1-21925000	1	21925090	21925590	+	734	1-21922000	1	21922013	21922513	+	177	3077	12	0.070444	1200	-21.2289	0.00028	3	0.070444	300	-2.53012	521	142	Yes	NA	Yes	NA	NA	Yes
AT1G12900	AT1G12855	1-4393000	1	4393016	4393516	+	177	1-4382000	1	4382079	4382579	+	691	10937	12	0.070444	1200	-21.2289	0.00028	3	0.070444	300	-2.53006	143	625	NA	Yes	NA	NA	Yes	NA
AT1G70840	AT1G70830	1-26714000	1	26714047	26714547	+	229	1-26710000	1	26710167	26710667	+	721	3880	12	0.070444	1200	-21.1545	0.000298	3	0.070444	300	-2.52958	152	630	NA	Yes	Yes	Yes	NA	NA
AT1G65150	AT1G65140	1-24205000	1	24205058	24205558	+	1049	1-24201500	1	24201498	24201998	+	247	3560	35	0.070444	3500	-95.5016	0	18	0.070444	1800	-38.0469	907	200	Yes	NA	NA	NA	NA	NA
AT3G01185	AT3G01180	3-66500	3	66385	66885	+	823	3-63000	3	62951	63451	+	146	3434	12	0.070444	1200	-21.2993	0.000265	3	0.070444	300	-2.52929	954	158	NA	Yes	NA	NA	Yes	Yes
AT1G55610	AT1G55600	1-20783000	1	20782862	20783362	+	1170	1-20774000	1	20773976	20774476	+	192	8886	12	0.070444	1200	-21.2032	0.000286	3	0.070444	300	-2.5291	1259	162	Yes	NA	NA	Yes	Yes	NA
AT2G42740	AT2G42720	2-17792000	2	17792038	17792538	+	361	2-17786000	2	17786020	17786520	+	1599	6018	14	0.070444	1400	-26.3429	2e-06	4	0.070444	400	-3.9739	326	1349	NA	Yes	NA	NA	Yes	NA
AT1G32020	AT1G32010	1-11512500	1	11512587	11513087	+	965	1-11511500	1	11511574	11512074	+	78	1013	13	0.070444	1300	-24.3872	1.5e-05	4	0.070444	400	-4.08262	921	29	Yes	NA	Yes	NA	NA	NA
AT2G44920	AT2G44910	2-18524500	2	18524480	18524980	+	1557	2-18518500	2	18518577	18519077	+	111	5903	23	0.070444	2300	-54.8203	0	10	0.070444	1000	-16.4816	1527	81	Yes	NA	NA	NA	Yes	Yes
AT2G21930	AT2G21910	2-9347500	2	9347545	9348045	+	1424	2-9342000	2	9341963	9342463	+	656	5582	14	0.070444	1400	-26.243	2e-06	4	0.070444	400	-3.97071	1220	479	NA	Yes	Yes	Yes	NA	NA
AT1G71690	AT1G71680	1-26948500	1	26948489	26948989	+	238	1-26944500	1	26944609	26945109	+	420	3880	12	0.070444	1200	-21.145	0.000301	3	0.070444	300	-2.52754	207	370	NA	Yes	NA	NA	NA	NA
AT2G43570	AT2G43520	2-18077000	2	18077034	18077534	+	257	2-18069000	2	18068904	18069404	+	1117	8130	12	0.070444	1200	-21.1271	0.000305	3	0.070444	300	-2.52649	255	1207	NA	Yes	NA	NA	Yes	NA
AT1G33720	AT1G33710	1-12223000	1	12223011	12223511	+	1569	1-12219500	1	12219512	12220012	+	85	3499	30	0.070444	3000	-81.1282	0	16	0.070444	1600	-33.6809	1049	57	Yes	NA	Yes	Yes	Yes	NA
AT1G48650	AT1G48640	1-17991000	1	17990940	17991440	+	140	1-17987000	1	17986977	17987477	+	1197	3963	20	0.070444	2000	-44.5789	0	8	0.070444	800	-11.7816	76	961	NA	Yes	NA	NA	Yes	NA
AT3G01680	AT3G01670	3-252500	3	252498	252998	+	156	3-247000	3	247093	247593	+	1706	5405	26	0.070444	2600	-64.2733	0	12	0.070444	1200	-21.4704	103	1654	NA	Yes	NA	NA	NA	NA
AT2G42835	AT2G42830	2-17824000	2	17824015	17824515	+	156	2-17820500	2	17820414	17820914	+	1613	3601	29	0.070444	2900	-74.8234	0	14	0.070444	1400	-26.7561	129	1450	NA	Yes	NA	Yes	NA	NA
AT1G57820	AT1G57800	1-21417500	1	21417399	21417899	+	1361	1-21410000	1	21410014	21410514	+	152	7385	23	0.070444	2300	-54.1753	0	10	0.070444	1000	-16.4529	1265	86	Yes	NA	Yes	Yes	NA	NA
AT2G15327	AT2G15318	2-6672000	2	6671995	6672495	+	112	2-6664500	2	6664570	6665070	+	1609	7425	27	0.070444	2700	-68.7074	0	13	0.070444	1300	-24.3289	83	1647	NA	Yes	Yes	NA	NA	NA
AT1G48510	AT1G48490	1-17935000	1	17934950	17935450	+	2087	1-17926000	1	17925975	17926475	+	67	8975	15	0.070444	1500	-30.3252	0	5	0.070444	500	-5.74437	1769	49	Yes	NA	Yes	NA	NA	Yes
AT1G49975	AT1G49938	1-18505000	1	18504997	18505497	+	1030	1-18487500	1	18487483	18487983	+	1988	17514	12	0.097825	864.124	-20.9617	0.000352	3	0.09826	215.076	-2.52313	987	1925	NA	Yes	NA	NA	Yes	NA
AT2G36720	AT2G36710	2-15394000	2	15394033	15394533	+	122	2-15391000	2	15391061	15391561	+	1159	2972	17	0.070444	1700	-35.4887	0	6	0.070444	600	-7.54487	91	777	NA	Yes	NA	NA	Yes	NA
AT1G72000	AT1G71980	1-27103000	1	27102927	27103427	+	1667	1-27099500	1	27099501	27100001	+	104	3426	23	0.070444	2300	-54.986	0	10	0.070444	1000	-16.4227	1329	92	Yes	NA	NA	NA	NA	Yes
AT2G17440	AT2G17430	2-7573000	2	7573017	7573517	+	137	2-7568000	2	7568080	7568580	+	1675	4937	23	0.070444	2300	-54.3634	0	10	0.070444	1000	-16.4227	92	1324	NA	Yes	NA	NA	Yes	Yes
AT1G63000	AT1G62990	1-23343000	1	23343115	23343615	+	115	1-23337000	1	23337108	23337608	+	1316	6007	17	0.070444	1700	-35.5558	0	6	0.070444	600	-7.5423	93	1270	NA	Yes	NA	Yes	Yes	Yes
AT2G13900	AT2G13895	2-5833000	2	5833090	5833590	+	347	2-5829000	2	5829148	5829648	+	29	3942	7	0.070444	700	-9.98071	1	1	0.070444	100	-0.441278	322	17	NA	NA	NA	NA	NA	NA
AT2G02550	AT2G02540	2-688000	2	687985	688485	+	79	2-684000	2	684143	684643	+	1069	3842	19	0.070444	1900	-42.4217	0	8	0.070444	800	-12.085	39	1021	NA	Yes	NA	Yes	NA	NA
AT1G69870	AT1G69860	1-26316000	1	26316049	26316549	+	72	1-26309500	1	26309613	26310113	+	1356	6436	15	0.070444	1500	-30.2127	0	5	0.070444	500	-5.72915	55	1262	NA	Yes	Yes	Yes	Yes	Yes
AT2G28290	AT2G28260	2-12062500	2	12062576	12063076	+	31	2-12050500	2	12050482	12050982	+	1757	12094	7	0.070444	700	-9.93891	1	1	0.070444	100	-0.443136	19	1438	NA	Yes	NA	NA	Yes	NA
AT3G13990	AT3G13980	3-4627000	3	4626968	4627468	+	102	3-4620000	3	4620084	4620584	+	1433	6884	21	0.070444	2100	-48.3537	0	9	0.070444	900	-14.1913	61	1370	NA	Yes	NA	NA	Yes	Yes
AT1G73820	AT1G73810	1-27756500	1	27756512	27757012	+	616	1-27755000	1	27754956	27755456	+	103	1556	17	0.070444	1700	-35.6934	0	6	0.070444	600	-7.52252	515	112	Yes	NA	NA	NA	Yes	Yes
AT1G02540	AT1G02520	1-535000	1	535008	535508	+	152	1-524000	1	523976	524476	+	1854	11032	20	0.070444	2000	-44.4717	0	8	0.070444	800	-11.7235	94	1552	NA	Yes	NA	NA	NA	Yes
AT1G75920	AT1G75910	1-28504000	1	28504078	28504578	+	80	1-28501500	1	28501495	28501995	+	1479	2583	15	0.070444	1500	-30.0642	0	5	0.070444	500	-5.72482	57	1274	NA	Yes	Yes	Yes	NA	NA
AT1G32430	AT1G32415	1-11705500	1	11705543	11706043	+	1752	1-11696500	1	11696505	11697005	+	142	9038	20	0.070444	2000	-44.5597	0	8	0.070444	800	-11.716	1327	97	Yes	NA	Yes	NA	NA	NA
AT2G34210	AT2G34208	2-14446500	2	14446507	14447007	+	1940	2-14445000	2	14444984	14445484	+	263	1523	80	0.070444	8000	-287.812	0	56	0.070444	5600	-181.115	1616	211	Yes	NA	NA	NA	NA	NA
AT1G05410	AT1G05380	1-1587000	1	1586988	1587488	+	1718	1-1579000	1	1579071	1579571	+	100	7917	15	0.070444	1500	-29.8034	0	5	0.070444	500	-5.71526	1714	62	Yes	NA	NA	NA	Yes	Yes
AT1G05400	AT1G05380	1-1584500	1	1584477	1584977	+	2036	1-1582000	1	1581895	1582395	+	86	2582	15	0.070444	1500	-29.9723	0	5	0.070444	500	-5.71025	1835	65	Yes	NA	NA	NA	Yes	Yes
AT2G35270	AT2G35250	2-14857000	2	14857050	14857550	+	1349	2-14847000	2	14847032	14847532	+	46	10018	7	0.070444	700	-9.74922	1	1	0.070444	100	-0.446907	1211	25	Yes	NA	Yes	NA	Yes	Yes
AT2G46500	AT2G46495	2-19087000	2	19087031	19087531	+	179	2-19084000	2	19084104	19084604	+	1281	2927	23	0.070444	2300	-53.9201	0	10	0.070444	1000	-16.2961	131	926	NA	Yes	NA	Yes	Yes	NA
AT1G29160	AT1G29120	1-10183500	1	10183594	10184094	+	1997	1-10177500	1	10177490	10177990	+	87	6104	15	0.070444	1500	-29.9583	0	5	0.070444	500	-5.69897	1843	73	Yes	NA	NA	NA	Yes	Yes
AT1G34420	AT1G34410	1-12585000	1	12584902	12585402	+	1052	1-12580500	1	12580327	12580827	+	62	4575	7	0.070444	700	-9.65306	1	1	0.070444	100	-0.44818	919	28	Yes	NA	NA	NA	Yes	NA
AT2G20825	AT2G20800	2-8966000	2	8966079	8966579	+	60	2-8955000	2	8955162	8955662	+	831	10917	7	0.070444	700	-9.66213	1	1	0.070444	100	-0.44818	28	663	NA	Yes	NA	Yes	Yes	Yes
AT3G07360	AT3G07350	3-2356500	3	2356491	2356991	+	64	3-2347500	3	2347514	2348014	+	846	8977	7	0.070444	700	-9.64458	1	1	0.070444	100	-0.448546	29	1080	NA	Yes	NA	NA	Yes	Yes
AT3G08690	AT3G08660	3-2641500	3	2641668	2642168	+	1160	3-2633000	3	2632865	2633365	+	33	8803	7	0.070444	700	-9.90267	1	1	0.070444	100	-0.448887	1171	30	Yes	NA	NA	NA	Yes	Yes
AT1G24430	AT1G24400	1-8659000	1	8658934	8659434	+	1249	1-8651500	1	8651461	8651961	+	94	7473	15	0.070444	1500	-29.8692	0	5	0.070444	500	-5.69205	1065	79	Yes	NA	NA	NA	NA	NA
AT3G17720	AT3G17700	3-6063000	3	6063080	6063580	+	2089	3-6050500	3	6050510	6051010	+	95	12570	15	0.070444	1500	-29.8576	0	5	0.070444	500	-5.69205	1837	79	Yes	NA	NA	NA	NA	Yes
AT1G24320	AT1G24300	1-8630000	1	8630045	8630545	+	1030	1-8619000	1	8619034	8619534	+	55	11011	7	0.070444	700	-9.68786	1	1	0.070444	100	-0.449205	923	31	Yes	NA	NA	NA	Yes	Yes
AT1G63020	AT1G62975	1-23359500	1	23359443	23359943	+	79	1-23329000	1	23328993	23329493	+	1768	30450	7	0.070444	700	-9.59518	1	1	0.070444	100	-0.449504	32	1668	NA	Yes	NA	Yes	Yes	Yes
AT1G76550	AT1G76510	1-28723000	1	28722861	28723361	+	51	1-28712000	1	28712047	28712547	+	1018	10814	7	0.070444	700	-9.7123	1	1	0.070444	100	-0.449504	32	976	NA	Yes	NA	NA	Yes	Yes
AT1G10510	AT1G10490	1-3465000	1	3465105	3465605	+	48	1-3454000	1	3454034	3454534	+	1150	11071	7	0.070444	700	-9.73347	1	1	0.070444	100	-0.449784	33	869	NA	Yes	NA	NA	Yes	Yes
AT1G10760	AT1G10750	1-3584500	1	3584431	3584931	+	62	1-3578000	1	3577937	3578437	+	626	6494	7	0.070444	700	-9.65306	1	1	0.070444	100	-0.450048	34	763	NA	Yes	NA	Yes	Yes	NA
AT1G35250	AT1G35240	1-12933500	1	12933509	12934009	+	1172	1-12929000	1	12929130	12929630	+	38	4379	7	0.070444	700	-9.83019	1	1	0.070444	100	-0.450048	1027	34	Yes	NA	Yes	NA	NA	NA
AT2G28290	AT2G28250	2-12061000	2	12060970	12061470	+	56	2-12043500	2	12043550	12044050	+	1567	17420	7	0.070444	700	-9.68233	1	1	0.070444	100	-0.450048	34	1288	NA	Yes	NA	NA	Yes	NA
AT1G77640	AT1G77620	1-29179500	1	29179513	29180013	+	1114	1-29169000	1	29168882	29169382	+	72	10631	7	0.070444	700	-9.61557	1	1	0.070444	100	-0.450296	1428	35	Yes	NA	NA	NA	Yes	Yes
AT3G14790	AT3G14770	3-4965000	3	4964946	4965446	+	82	3-4959000	3	4958968	4959468	+	1883	5978	21	0.070444	2100	-48.8997	0	9	0.070444	900	-14.0785	78	1941	NA	Yes	NA	NA	Yes	Yes
AT2G31510	AT2G31480	2-13416500	2	13416605	13417105	+	113	2-13410500	2	13410394	13410894	+	1788	6211	15	0.070444	1500	-29.6861	0	5	0.070444	500	-5.68349	88	1391	NA	Yes	NA	Yes	Yes	NA
AT2G34230	AT2G34220	2-14455500	2	14455537	14456037	+	135	2-14451500	2	14451421	14451921	+	686	4116	15	0.070444	1500	-29.5413	0	5	0.070444	500	-5.68349	88	734	NA	Yes	NA	NA	NA	NA
AT3G16390	AT3G16370	3-5563500	3	5563507	5564007	+	1822	3-5557500	3	5557465	5557965	+	140	6042	15	0.070444	1500	-29.515	0	5	0.070444	500	-5.68349	1674	88	Yes	NA	NA	NA	NA	Yes
AT1G48400	AT1G48370	1-17882000	1	17881845	17882345	+	643	1-17876500	1	17876470	17876970	+	58	5375	7	0.070444	700	-9.67187	1	1	0.070444	100	-0.450752	414	37	Yes	NA	NA	NA	NA	Yes
AT1G53200	AT1G53180	1-19841000	1	19841008	19841508	+	67	1-19832000	1	19832027	19832527	+	975	8981	7	0.070444	700	-9.63285	1	1	0.070444	100	-0.450752	37	972	NA	Yes	NA	NA	Yes	Yes
AT1G54300	AT1G54280	1-20271500	1	20271383	20271883	+	707	1-20263500	1	20263476	20263976	+	43	7907	7	0.070444	700	-9.7758	1	1	0.070444	100	-0.450752	491	37	Yes	NA	NA	NA	Yes	NA
AT1G70510	AT1G70500	1-26576000	1	26576051	26576551	+	73	1-26568000	1	26568120	26568620	+	1205	7931	13	0.070444	1300	-24.454	1.4e-05	4	0.070444	400	-4.03536	47	881	NA	Yes	Yes	Yes	Yes	Yes
AT2G34380	AT2G34370	2-14513500	2	14513479	14513979	+	137	2-14511000	2	14510849	14511349	+	1362	2630	15	0.070444	1500	-29.5306	0	5	0.070444	500	-5.68102	91	1025	NA	Yes	NA	NA	Yes	NA
AT1G62305	AT1G62300	1-23027000	1	23027018	23027518	+	47	1-23018000	1	23018060	23018560	+	646	8958	7	0.070444	700	-9.74117	1	1	0.070444	100	-0.451351	40	671	NA	Yes	NA	Yes	Yes	Yes
AT2G04100	AT2G04090	2-1375500	2	1375554	1376054	+	59	2-1364000	2	1364141	1364641	+	452	11413	7	0.070444	700	-9.66691	1	1	0.070444	100	-0.451351	40	350	NA	Yes	NA	Yes	Yes	NA
AT2G34210	AT2G34190	2-14446500	2	14446449	14446949	+	1940	2-14438000	2	14438109	14438609	+	78	8340	7	0.070444	700	-9.59786	1	1	0.070444	100	-0.451351	1616	40	Yes	NA	NA	NA	NA	NA
AT3G10700	AT3G10690	3-3350500	3	3350482	3350982	+	918	3-3342500	3	3342586	3343086	+	67	7896	7	0.070444	700	-9.63285	1	1	0.070444	100	-0.451351	1023	40	Yes	NA	NA	NA	Yes	Yes
AT1G10690	AT1G10680	1-3550000	1	3550077	3550577	+	1284	1-3540500	1	3540403	3540903	+	68	9674	7	0.070444	700	-9.62918	1	1	0.070444	100	-0.45153	1280	41	Yes	NA	NA	NA	Yes	NA
AT1G70505	AT1G70500	1-26571500	1	26571540	26572040	+	54	1-26568500	1	26568553	26569053	+	398	2987	7	0.070444	700	-9.69361	1	1	0.070444	100	-0.45153	41	356	NA	Yes	NA	Yes	NA	Yes
AT3G17570	AT3G17530	3-6010000	3	6010009	6010509	+	53	3-6000500	3	6000668	6001168	+	682	9341	7	0.070444	700	-9.69959	1	1	0.070444	100	-0.45153	41	572	NA	NA	Yes	NA	NA	NA
AT1G62410	AT1G62380	1-23093500	1	23093428	23093928	+	71	1-23082500	1	23082513	23083013	+	1602	10915	7	0.070444	700	-9.61882	1	1	0.070444	100	-0.451702	42	1834	NA	Yes	Yes	NA	NA	Yes
AT2G35110	AT2G35075	2-14801500	2	14801505	14802005	+	61	2-14787500	2	14787506	14788006	+	750	13999	7	0.070444	700	-9.65752	1	1	0.070444	100	-0.451702	42	460	NA	Yes	NA	NA	Yes	NA
AT1G49100	AT1G49040	1-18169000	1	18169069	18169569	+	1973	1-18146000	1	18146075	18146575	+	94	22994	13	0.070444	1300	-24.2238	1.7e-05	4	0.070444	400	-4.03233	1561	49	Yes	NA	Yes	NA	NA	Yes
AT2G02690	AT2G02680	2-750000	2	750108	750608	+	99	2-747000	2	747010	747510	+	1314	3098	25	0.070444	2500	-62.0422	0	12	0.070444	1200	-21.6833	76	949	NA	Yes	Yes	Yes	NA	Yes
AT1G27130	AT1G27110	1-9426000	1	9426095	9426595	+	1485	1-9417000	1	9416972	9417472	+	55	9123	7	0.070444	700	-9.68786	1	1	0.070444	100	-0.451865	1405	43	Yes	NA	NA	NA	Yes	Yes
AT1G26520	AT1G26500	1-9163500	1	9163523	9164023	+	69	1-9159000	1	9158899	9159399	+	392	4624	7	0.070444	700	-9.62562	1	1	0.070444	100	-0.452021	44	314	NA	Yes	NA	NA	Yes	Yes
AT3G09680	AT3G09650	3-2969000	3	2969189	2969689	+	806	3-2960000	3	2960061	2960561	+	68	9128	7	0.070444	700	-9.62918	1	1	0.070444	100	-0.452021	650	44	Yes	NA	NA	NA	NA	Yes
AT1G26680	AT1G26670	1-9220500	1	9220309	9220809	+	679	1-9217000	1	9216992	9217492	+	204	3317	20	0.070444	2000	-44.1583	0	8	0.070444	800	-11.6064	509	184	Yes	NA	NA	NA	NA	Yes
AT1G27070	AT1G27045	1-9397000	1	9397023	9397523	+	78	1-9392000	1	9392126	9392626	+	943	4897	7	0.070444	700	-9.59786	1	1	0.070444	100	-0.452169	45	984	NA	Yes	NA	NA	Yes	Yes
AT1G52280	AT1G52240	1-19468000	1	19467908	19468408	+	51	1-19457000	1	19456998	19457498	+	1187	10910	7	0.070444	700	-9.7123	1	1	0.070444	100	-0.452169	45	1010	NA	Yes	NA	NA	Yes	NA
AT2G16960	AT2G16950	2-7366000	2	7365908	7366408	+	863	2-7355500	2	7355560	7356060	+	63	10348	7	0.070444	700	-9.64875	1	1	0.070444	100	-0.452169	787	45	Yes	NA	Yes	NA	NA	Yes
AT2G48140	AT2G48110	2-19686500	2	19686592	19687092	+	1240	2-19678500	2	19678585	19679085	+	72	8007	7	0.070444	700	-9.61557	1	1	0.070444	100	-0.452169	928	45	Yes	NA	NA	NA	NA	Yes
AT1G76705	AT1G76690	1-28787000	1	28787085	28787585	+	62	1-28779000	1	28778927	28779427	+	1536	8158	7	0.070444	700	-9.65306	1	1	0.070444	100	-0.452312	46	1597	NA	Yes	NA	NA	Yes	Yes
AT1G20160	AT1G20132	1-6993000	1	6993017	6993517	+	127	1-6982000	1	6982042	6982542	+	2024	10975	15	0.070444	1500	-29.5879	0	5	0.070444	500	-5.67261	103	1594	NA	Yes	NA	Yes	NA	NA
AT1G16110	AT1G16070	1-5518500	1	5518468	5518968	+	1431	1-5513500	1	5513355	5513855	+	45	5113	11	0.070444	1100	-19.5305	0.001463	3	0.070444	300	-2.56078	1464	31	Yes	NA	NA	NA	Yes	Yes
AT1G19790	AT1G19750	1-6839000	1	6839074	6839574	+	1433	1-6826500	1	6826579	6827079	+	47	12495	7	0.070444	700	-9.74117	1	1	0.070444	100	-0.452448	1248	47	Yes	NA	Yes	NA	Yes	Yes
AT1G19790	AT1G19750	1-6839500	1	6839503	6840003	+	1449	1-6829500	1	6829517	6830017	+	69	9986	7	0.070444	700	-9.62562	1	1	0.070444	100	-0.452448	1432	47	Yes	NA	Yes	NA	Yes	Yes
AT1G61970	AT1G61940	1-22906500	1	22906446	22906946	+	100	1-22898500	1	22898569	22899069	+	1206	7877	7	0.070444	700	-9.55165	1	1	0.070444	100	-0.452448	47	972	NA	Yes	NA	NA	Yes	NA
AT2G35330	AT2G35270	2-14871500	2	14871516	14872016	+	56	2-14857000	2	14857054	14857554	+	1349	14462	7	0.070444	700	-9.68233	1	1	0.070444	100	-0.452448	47	1211	NA	Yes	NA	Yes	Yes	Yes
AT3G18330	AT3G18270	3-6291500	3	6291492	6291992	+	1698	3-6263500	3	6263472	6263972	+	63	28020	7	0.070444	700	-9.64875	1	1	0.070444	100	-0.452448	1444	47	Yes	NA	NA	NA	Yes	Yes
AT2G31060	AT2G31020	2-13218000	2	13217934	13218434	+	1798	2-13203500	2	13203570	13204070	+	66	14364	7	0.070444	700	-9.63664	1	1	0.070444	100	-0.452578	1777	48	Yes	NA	NA	NA	Yes	NA
AT3G01300	AT3G01210	3-91000	3	90908	91408	+	85	3-71500	3	71641	72141	+	1440	19267	7	0.070444	700	-9.58047	1	1	0.070444	100	-0.452578	48	2027	NA	Yes	NA	Yes	Yes	Yes
AT1G79500	AT1G79480	1-29905000	1	29905014	29905514	+	68	1-29899500	1	29899442	29899942	+	710	5572	7	0.070444	700	-9.62918	1	1	0.070444	100	-0.452703	49	635	NA	Yes	NA	NA	NA	NA
AT1G29240	AT1G29180	1-10219000	1	10218987	10219487	+	83	1-10200500	1	10200503	10201003	+	1988	18484	7	0.070444	700	-9.58513	1	1	0.070444	100	-0.452824	50	1456	NA	Yes	NA	NA	Yes	Yes
AT1G59820	AT1G59810	1-22015000	1	22015062	22015562	+	79	1-22008500	1	22008430	22008930	+	1395	6632	7	0.070444	700	-9.59518	1	1	0.070444	100	-0.452824	50	1235	NA	Yes	NA	Yes	Yes	NA
AT2G19120	AT2G19110	2-8288000	2	8287984	8288484	+	77	2-8279000	2	8278774	8279274	+	557	9210	7	0.070444	700	-9.60061	1	1	0.070444	100	-0.452824	50	541	NA	Yes	NA	NA	Yes	Yes
AT3G04240	AT3G04210	3-1116000	3	1116067	1116567	+	70	3-1108000	3	1108029	1108529	+	782	8038	7	0.070444	700	-9.62217	1	1	0.070444	100	-0.452824	50	963	NA	Yes	NA	NA	Yes	Yes
AT1G12855	AT1G12845	1-4383000	1	4383031	4383531	+	609	1-4378500	1	4378598	4379098	+	42	4433	7	0.070444	700	-9.78556	1	1	0.070444	100	-0.452939	587	51	Yes	NA	NA	NA	NA	Yes
AT2G30350	AT2G30280	2-12935000	2	12935072	12935572	+	1640	2-12911000	2	12910929	12911429	+	76	24143	7	0.070444	700	-9.60344	1	1	0.070444	100	-0.452939	1598	51	Yes	NA	NA	NA	Yes	Yes
AT2G47260	AT2G47250	2-19406000	2	19406116	19406616	+	536	2-19400500	2	19400481	19400981	+	62	5635	7	0.070444	700	-9.65306	1	1	0.070444	100	-0.452939	527	51	Yes	NA	NA	NA	Yes	Yes
AT1G66560	AT1G66550	1-24833500	1	24833484	24833984	+	332	1-24828500	1	24828363	24828863	+	1828	5121	26	0.070444	2600	-63.155	0	12	0.070444	1200	-21.1334	250	1563	NA	Yes	NA	NA	NA	NA
AT2G42470	AT2G42450	2-17684000	2	17684084	17684584	+	1632	2-17674000	2	17673895	17674395	+	65	10189	7	0.070444	700	-9.64054	1	1	0.070444	100	-0.45305	1187	52	Yes	NA	Yes	NA	NA	Yes
AT1G53470	AT1G53430	1-19958500	1	19958598	19959098	+	1454	1-19940500	1	19940431	19940931	+	93	18167	7	0.070444	700	-9.56391	1	1	0.070444	100	-0.453156	1473	53	Yes	NA	NA	NA	Yes	Yes
AT3G11440	AT3G11435	3-3603500	3	3603461	3603961	+	70	3-3599500	3	3599700	3600200	+	606	3761	7	0.070444	700	-9.62217	1	1	0.070444	100	-0.453156	53	526	NA	Yes	NA	NA	Yes	NA
AT1G26720	AT1G26690	1-9234500	1	9234521	9235021	+	72	1-9225000	1	9225014	9225514	+	1906	9507	11	0.070444	1100	-19.0857	0.002247	3	0.070444	300	-2.55951	32	2031	NA	Yes	Yes	NA	NA	Yes
AT1G77640	AT1G77630	1-29179500	1	29179487	29179987	+	1114	1-29174500	1	29174537	29175037	+	47	4950	11	0.070444	1100	-19.4782	0.001541	3	0.070444	300	-2.55951	1428	32	Yes	NA	NA	NA	Yes	Yes
AT1G26700	AT1G26690	1-9228500	1	9228482	9228982	+	132	1-9225000	1	9225027	9225527	+	1906	3455	18	0.070444	1800	-38.4296	0	7	0.070444	700	-9.59257	80	2031	NA	Yes	Yes	NA	NA	Yes
AT1G71290	AT1G71270	1-26872500	1	26872555	26873055	+	1464	1-26864500	1	26864428	26864928	+	81	8127	7	0.070444	700	-9.59003	1	1	0.070444	100	-0.453259	1351	54	Yes	NA	NA	NA	NA	Yes
AT1G79000	AT1G78980	1-29721000	1	29721004	29721504	+	92	1-29710500	1	29710467	29710967	+	1556	10537	7	0.070444	700	-9.56582	1	1	0.070444	100	-0.453259	54	1440	NA	Yes	NA	NA	Yes	NA
AT3G03630	AT3G03610	3-878000	3	878059	878559	+	1455	3-870500	3	870452	870952	+	80	7607	7	0.070444	700	-9.59257	1	1	0.070444	100	-0.453259	1281	54	NA	NA	NA	NA	Yes	Yes
AT1G73340	AT1G73290	1-27573500	1	27573496	27573996	+	1866	1-27556000	1	27556135	27556635	+	60	17361	7	0.070444	700	-9.66213	1	1	0.070444	100	-0.453358	1319	55	Yes	NA	NA	NA	Yes	NA
AT3G15356	AT3G15350	3-5174500	3	5174691	5175191	+	781	3-5167500	3	5167489	5167989	+	79	7202	7	0.070444	700	-9.59518	1	1	0.070444	100	-0.453358	804	55	Yes	NA	NA	NA	Yes	Yes
AT1G01050	AT1G01010	1-31500	1	31467	31967	+	77	4000-01-01	1	4080	4580	+	959	27387	7	0.070444	700	-9.60061	1	1	0.070444	100	-0.453454	56	728	NA	Yes	NA	NA	NA	Yes
AT1G14460	AT1G14420	1-4950000	1	4950071	4950571	+	86	1-4933000	1	4933012	4933512	+	1760	17059	7	0.070444	700	-9.57823	1	1	0.070444	100	-0.453454	56	1601	NA	Yes	NA	NA	Yes	Yes
AT2G32400	AT2G32340	2-13754000	2	13754069	13754569	+	83	2-13733000	2	13733023	13733523	+	1729	21046	7	0.070444	700	-9.58513	1	1	0.070444	100	-0.453454	56	1601	NA	Yes	NA	NA	Yes	NA
AT1G75270	AT1G75260	1-28251000	1	28251105	28251605	+	1131	1-28248500	1	28248483	28248983	+	245	2622	23	0.070444	2300	-53.5419	0	10	0.070444	1000	-16.1856	1174	211	Yes	NA	NA	NA	Yes	NA
AT1G20150	AT1G20135	1-6988000	1	6987978	6988478	+	191	1-6985000	1	6984921	6985421	+	748	3057	15	0.070444	1500	-29.328	0	5	0.070444	500	-5.6655	116	656	NA	Yes	NA	Yes	Yes	NA
AT1G50840	AT1G50830	1-18840000	1	18839937	18840437	+	317	1-18836000	1	18836084	18836584	+	90	3853	7	0.070444	700	-9.56977	1	1	0.070444	100	-0.45372	233	59	Yes	NA	NA	NA	Yes	Yes
AT1G67290	AT1G67260	1-25192000	1	25192077	25192577	+	95	1-25169000	1	25168920	25169420	+	1248	23157	7	0.070444	700	-9.56022	1	1	0.070444	100	-0.45372	59	950	NA	Yes	NA	Yes	Yes	NA
AT2G17787	AT2G17785	2-7732500	2	7732475	7732975	+	73	2-7729000	2	7728867	7729367	+	592	3608	7	0.070444	700	-9.61241	1	1	0.070444	100	-0.45372	59	538	NA	Yes	NA	NA	Yes	NA
AT2G46494	AT2G46470	2-19083000	2	19082959	19083459	+	768	2-19074500	2	19074552	19075052	+	59	8407	7	0.070444	700	-9.66691	1	1	0.070444	100	-0.45372	606	59	Yes	NA	Yes	NA	NA	Yes
AT1G09490	AT1G09470	1-3064500	1	3064319	3064819	+	1294	1-3056000	1	3056073	3056573	+	81	8246	7	0.070444	700	-9.59003	1	1	0.070444	100	-0.453803	1269	60	Yes	NA	NA	NA	Yes	Yes
AT1G24070	AT1G24060	1-8519000	1	8518954	8519454	+	340	1-8509500	1	8509620	8510120	+	56	9334	7	0.070444	700	-9.68233	1	1	0.070444	100	-0.453883	337	61	Yes	NA	Yes	NA	NA	NA
AT2G23590	AT2G23520	2-10035500	2	10035431	10035931	+	1618	2-10014500	2	10014452	10014952	+	88	20979	7	0.070444	700	-9.5739	1	1	0.070444	100	-0.453883	1478	61	Yes	NA	Yes	NA	NA	Yes
AT2G40340	AT2G40310	2-16849500	2	16849537	16850037	+	1952	2-16835000	2	16834999	16835499	+	118	14538	7	0.070444	700	-9.52698	1	1	0.070444	100	-0.453883	1674	61	Yes	NA	NA	NA	Yes	Yes
AT2G41890	AT2G41870	2-17478500	2	17478522	17479022	+	108	2-17472000	2	17472081	17472581	+	1005	6441	7	0.070444	700	-9.53964	1	1	0.070444	100	-0.453883	61	1273	NA	Yes	NA	NA	Yes	Yes
AT1G12490	AT1G12470	1-4261000	1	4261039	4261539	+	723	1-4252000	1	4252037	4252537	+	73	9002	7	0.070444	700	-9.61241	1	1	0.070444	100	-0.453961	624	62	Yes	NA	NA	NA	Yes	Yes
AT1G32450	AT1G32430	1-11718500	1	11718607	11719107	+	57	1-11705500	1	11705520	11706020	+	1752	13087	11	0.070444	1100	-19.2764	0.001878	3	0.070444	300	-2.55831	33	1327	NA	Yes	NA	Yes	NA	NA
AT1G74260	AT1G74230	1-27924500	1	27924449	27924949	+	83	1-27914500	1	27914555	27915055	+	1153	9894	11	0.070444	1100	-18.9921	0.002437	3	0.070444	300	-2.55831	33	1187	NA	Yes	NA	NA	NA	Yes
AT3G04440	AT3G04420	3-1180500	3	1180536	1181036	+	40	3-1173500	3	1173493	1173993	+	2004	7043	11	0.070444	1100	-19.6871	0.001252	3	0.070444	300	-2.55831	33	1718	NA	Yes	NA	NA	NA	Yes
AT1G11740	AT1G11730	1-3964000	1	3963988	3964488	+	98	1-3957500	1	3957452	3957952	+	655	6536	7	0.070444	700	-9.55497	1	1	0.070444	100	-0.454036	63	544	NA	Yes	NA	NA	Yes	NA
AT3G12980	AT3G12970	3-4154500	3	4154451	4154951	+	92	3-4141500	3	4141700	4142200	+	1120	12751	7	0.070444	700	-9.56582	1	1	0.070444	100	-0.454036	63	1049	NA	Yes	NA	NA	Yes	Yes
AT1G20090	AT1G20080	1-6968500	1	6968495	6968995	+	86	1-6962000	1	6961898	6962398	+	544	6597	7	0.070444	700	-9.57823	1	1	0.070444	100	-0.454109	64	441	NA	Yes	NA	NA	Yes	NA
AT1G55320	AT1G55290	1-20634000	1	20633839	20634339	+	564	1-20626000	1	20626077	20626577	+	74	7762	7	0.070444	700	-9.60933	1	1	0.070444	100	-0.454109	445	64	Yes	NA	NA	NA	Yes	NA
AT1G56070	AT1G55960	1-20969000	1	20968938	20969438	+	102	1-20930000	1	20929996	20930496	+	1928	38942	7	0.070444	700	-9.54847	1	1	0.070444	100	-0.454109	64	2033	NA	Yes	NA	NA	Yes	Yes
AT3G06990	AT3G06960	3-2206500	3	2206459	2206959	+	1721	3-2195000	3	2195027	2195527	+	90	11432	7	0.070444	700	-9.56977	1	1	0.070444	100	-0.454109	1571	64	Yes	NA	NA	NA	Yes	Yes
AT2G31710	AT2G31690	2-13482000	2	13482034	13482534	+	1084	2-13477000	2	13477050	13477550	+	71	4984	16	0.070444	1600	-33.2335	0	6	0.070444	600	-7.66541	954	46	Yes	NA	NA	NA	Yes	NA
AT1G17000	AT1G16970	1-5813500	1	5813581	5814081	+	1028	1-5801000	1	5800967	5801467	+	95	12614	7	0.070444	700	-9.56022	1	1	0.070444	100	-0.45418	818	65	Yes	NA	Yes	NA	NA	Yes
AT1G20160	AT1G20120	1-6991000	1	6991063	6991563	+	98	1-6975500	1	6975563	6976063	+	1214	15500	7	0.070444	700	-9.55497	1	1	0.070444	100	-0.45418	65	1077	NA	Yes	NA	Yes	NA	NA
AT1G24450	AT1G24430	1-8665000	1	8665045	8665545	+	81	1-8658500	1	8658303	8658803	+	588	6742	7	0.070444	700	-9.59003	1	1	0.070444	100	-0.45418	65	423	NA	Yes	NA	NA	Yes	NA
AT1G75150	AT1G75120	1-28206500	1	28206490	28206990	+	94	1-28198000	1	28197984	28198484	+	1308	8506	7	0.070444	700	-9.56204	1	1	0.070444	100	-0.45418	65	1254	NA	Yes	NA	NA	Yes	Yes
AT2G39520	AT2G39480	2-16497500	2	16497389	16497889	+	1571	2-16480500	2	16480630	16481130	+	100	16759	7	0.070444	700	-9.55165	1	1	0.070444	100	-0.45418	1641	65	Yes	NA	Yes	NA	Yes	Yes
AT2G40810	AT2G40800	2-17032500	2	17032501	17033001	+	885	2-17025500	2	17025507	17026007	+	83	6994	7	0.070444	700	-9.58513	1	1	0.070444	100	-0.45418	979	65	Yes	NA	NA	NA	Yes	Yes
AT1G55790	AT1G55760	1-20855000	1	20855000	20855500	+	1132	1-20846500	1	20846547	20847047	+	92	8453	7	0.070444	700	-9.56582	1	1	0.070444	100	-0.454248	883	66	Yes	NA	NA	NA	NA	Yes
AT3G05327	AT3G05310	3-1517000	3	1517052	1517552	+	71	3-1511000	3	1511081	1511581	+	927	5971	7	0.070444	700	-9.61882	1	1	0.070444	100	-0.454314	67	704	NA	Yes	NA	NA	Yes	NA
AT1G28170	AT1G28120	1-9841500	1	9841460	9841960	+	1522	1-9814000	1	9814051	9814551	+	102	27409	7	0.070444	700	-9.54847	1	1	0.070444	100	-0.454379	1298	68	Yes	NA	NA	NA	NA	Yes
AT1G71300	AT1G71240	1-26874000	1	26874049	26874549	+	1073	1-26858000	1	26857941	26858441	+	98	16108	7	0.070444	700	-9.55497	1	1	0.070444	100	-0.454379	744	68	Yes	NA	NA	NA	NA	Yes
AT3G02050	AT3G02030	3-352000	3	351877	352377	+	1046	3-346000	3	345958	346458	+	106	5919	7	0.070444	700	-9.54247	1	1	0.070444	100	-0.454441	945	69	Yes	NA	NA	NA	Yes	Yes
AT2G15360	AT2G15350	2-6695000	2	6695023	6695523	+	78	2-6689000	2	6689046	6689546	+	1883	5977	19	0.070444	1900	-42.4519	0	8	0.070444	800	-11.9171	53	1440	NA	Yes	Yes	Yes	NA	NA
AT2G35580	AT2G35550	2-14934500	2	14934531	14935031	+	2062	2-14929000	2	14929010	14929510	+	104	5521	25	0.070444	2500	-61.8793	0	12	0.070444	1200	-21.6231	1908	82	Yes	NA	NA	NA	NA	NA
AT1G53430	AT1G53420	1-19936500	1	19936472	19936972	+	74	1-19931500	1	19931322	19931822	+	633	5150	7	0.070444	700	-9.60933	1	1	0.070444	100	-0.454561	71	619	NA	Yes	NA	Yes	Yes	NA
AT2G16980	AT2G16950	2-7376500	2	7376622	7377122	+	1358	2-7359000	2	7358965	7359465	+	94	17657	7	0.070444	700	-9.56204	1	1	0.070444	100	-0.454561	1300	71	Yes	NA	Yes	NA	NA	Yes
AT2G40140	AT2G40130	2-16773500	2	16773559	16774059	+	123	2-16767000	2	16766817	16767317	+	277	6742	7	0.070444	700	-9.52144	1	1	0.070444	100	-0.454561	71	350	NA	Yes	NA	NA	Yes	Yes
AT2G46130	AT2G46080	2-18957500	2	18957492	18957992	+	1337	2-18948500	2	18948466	18948966	+	106	9026	7	0.070444	700	-9.54247	1	1	0.070444	100	-0.454561	1116	71	Yes	NA	Yes	NA	Yes	Yes
AT3G10010	AT3G09990	3-3087500	3	3087495	3087995	+	78	3-3074500	3	3074337	3074837	+	1005	13158	7	0.070444	700	-9.59786	1	1	0.070444	100	-0.454561	71	855	NA	Yes	NA	Yes	Yes	NA
AT2G28060	AT2G28040	2-11950000	2	11950089	11950589	+	133	2-11936500	2	11936435	11936935	+	1506	13654	24	0.070444	2400	-57.7833	0	11	0.070444	1100	-18.8332	113	1151	NA	NA	NA	NA	Yes	NA
AT1G01680	AT1G01650	1-247500	1	247485	247985	+	1133	1-237500	1	237558	238058	+	109	9927	7	0.070444	700	-9.53827	1	1	0.070444	100	-0.454618	1047	72	Yes	NA	Yes	NA	NA	Yes
AT1G67280	AT1G67260	1-25189000	1	25189126	25189626	+	105	1-25168500	1	25168593	25169093	+	956	20533	7	0.070444	700	-9.54393	1	1	0.070444	100	-0.454618	72	726	NA	Yes	NA	Yes	Yes	NA
AT3G05310	AT3G05290	3-1510500	3	1510574	1511074	+	713	3-1506500	3	1506543	1507043	+	105	4031	7	0.070444	700	-9.54393	1	1	0.070444	100	-0.454618	615	72	Yes	NA	NA	NA	NA	Yes
AT2G04240	AT2G04235	2-1462000	2	1462058	1462558	+	81	2-1449500	2	1449398	1449898	+	453	12660	7	0.070444	700	-9.59003	1	1	0.070444	100	-0.454674	73	474	NA	Yes	NA	NA	Yes	Yes
AT2G37930	AT2G37900	2-15873000	2	15872902	15873402	+	899	2-15864500	2	15864590	15865090	+	105	8312	7	0.070444	700	-9.54393	1	1	0.070444	100	-0.454674	809	73	Yes	NA	NA	NA	Yes	Yes
AT2G46450	AT2G46420	2-19066500	2	19066451	19066951	+	80	2-19055000	2	19054999	19055499	+	1589	11452	7	0.070444	700	-9.59257	1	1	0.070444	100	-0.454674	73	1065	NA	Yes	NA	NA	Yes	Yes
AT1G06920	AT1G06910	1-2125000	1	2125093	2125593	+	997	1-2122000	1	2121963	2122463	+	51	3130	11	0.070444	1100	-19.387	0.001686	3	0.070444	300	-2.5572	902	34	Yes	NA	NA	NA	NA	Yes
AT1G60370	AT1G60270	1-22245000	1	22245057	22245557	+	126	1-22223500	1	22223567	22224067	+	1743	21490	7	0.070444	700	-9.51833	1	1	0.070444	100	-0.454728	74	1643	NA	Yes	Yes	NA	NA	Yes
AT1G70970	AT1G70950	1-26761000	1	26760946	26761446	+	95	1-26753500	1	26753296	26753796	+	808	7650	7	0.070444	700	-9.56022	1	1	0.070444	100	-0.454728	74	578	NA	Yes	NA	NA	NA	NA
AT1G72090	AT1G72060	1-27123500	1	27123588	27124088	+	875	1-27118000	1	27118091	27118591	+	94	5497	7	0.070444	700	-9.56204	1	1	0.070444	100	-0.454883	941	77	NA	NA	NA	NA	Yes	Yes
AT2G19110	AT2G19090	2-8278500	2	8278661	8279161	+	593	2-8267500	2	8267571	8268071	+	103	11090	7	0.070444	700	-9.54692	1	1	0.070444	100	-0.454883	679	77	Yes	NA	NA	NA	Yes	Yes
AT3G03940	AT3G03900	3-1018500	3	1018422	1018922	+	321	3-1003000	3	1003073	1003573	+	102	15349	7	0.070444	700	-9.54847	1	1	0.070444	100	-0.454883	488	77	Yes	NA	NA	NA	Yes	Yes
AT1G47830	AT1G47786	1-17613000	1	17613018	17613518	+	106	1-17599000	1	17598893	17599393	+	1529	14125	7	0.070444	700	-9.54247	1	1	0.070444	100	-0.454931	78	1290	NA	Yes	NA	Yes	Yes	NA
AT2G32670	AT2G32640	2-13858500	2	13858582	13859082	+	1704	2-13847500	2	13847505	13848005	+	126	11077	7	0.070444	700	-9.51833	1	1	0.070444	100	-0.454931	1400	78	Yes	NA	NA	NA	Yes	NA
AT1G10380	AT1G10340	1-3400500	1	3400684	3401184	+	640	1-3392000	1	3391960	3392460	+	115	8724	7	0.070444	700	-9.53054	1	1	0.070444	100	-0.454979	558	79	Yes	NA	NA	NA	NA	Yes
AT1G61563	AT1G61540	1-22715000	1	22714906	22715406	+	700	1-22703000	1	22703022	22703522	+	126	11884	7	0.070444	700	-9.51833	1	1	0.070444	100	-0.454979	728	79	Yes	NA	Yes	NA	NA	NA
AT2G03740	AT2G03720	2-1143500	2	1143465	1143965	+	114	2-1132000	2	1132146	1132646	+	944	11319	7	0.070444	700	-9.53177	1	1	0.070444	100	-0.454979	79	973	NA	Yes	Yes	Yes	Yes	NA
AT1G60870	AT1G60860	1-22409000	1	22409157	22409657	+	340	1-22405500	1	22405554	22406054	+	92	3603	7	0.070444	700	-9.56582	1	1	0.070444	100	-0.455025	339	80	Yes	NA	NA	NA	Yes	Yes
AT1G70890	AT1G70790	1-26725500	1	26725586	26726086	+	1941	1-26702000	1	26701883	26702383	+	107	23703	7	0.070444	700	-9.54104	1	1	0.070444	100	-0.455025	1780	80	Yes	NA	NA	NA	Yes	Yes
AT2G17110	AT2G17090	2-7443000	2	7443044	7443544	+	110	2-7436500	2	7436395	7436895	+	1814	6649	18	0.070444	1800	-38.6615	0	7	0.070444	700	-9.5739	88	1270	NA	Yes	NA	Yes	Yes	NA
AT1G23160	AT1G23100	1-8209500	1	8209523	8210023	+	92	1-8196000	1	8195945	8196445	+	1488	13578	7	0.070444	700	-9.56582	1	1	0.070444	100	-0.455071	81	1291	NA	Yes	NA	NA	NA	NA
AT1G21150	AT1G21100	1-7406000	1	7405968	7406468	+	101	1-7387500	1	7387482	7387982	+	1737	18486	7	0.070444	700	-9.55005	1	1	0.070444	100	-0.455115	82	1454	NA	Yes	NA	NA	Yes	Yes
AT1G74140	AT1G74100	1-27877500	1	27877375	27877875	+	1323	1-27864500	1	27864483	27864983	+	125	12892	7	0.070444	700	-9.51935	1	1	0.070444	100	-0.455115	1103	82	Yes	NA	NA	NA	NA	Yes
AT1G65483	AT1G65470	1-24342000	1	24342160	24342660	+	1108	1-24321000	1	24320982	24321482	+	125	21178	7	0.070444	700	-9.51935	1	1	0.070444	100	-0.455158	788	83	Yes	NA	Yes	NA	NA	Yes
AT1G12550	AT1G12530	1-4275500	1	4275320	4275820	+	773	1-4270500	1	4270545	4271045	+	139	4775	15	0.070444	1500	-29.5201	0	5	0.070444	500	-5.65623	577	139	Yes	NA	NA	NA	Yes	Yes
AT2G42470	AT2G42430	2-17684000	2	17684059	17684559	+	1632	2-17663500	2	17663490	17663990	+	132	20569	7	0.070444	700	-9.51254	1	1	0.070444	100	-0.4552	1187	84	Yes	NA	Yes	NA	NA	Yes
AT1G12550	AT1G12500	1-4275000	1	4275092	4275592	+	1392	1-4263000	1	4262921	4263421	+	90	12171	7	0.070444	700	-9.56977	1	1	0.070444	100	-0.455241	1309	85	Yes	NA	NA	NA	Yes	Yes
AT1G66190	AT1G66160	1-24653000	1	24652880	24653380	+	1247	1-24637000	1	24637051	24637551	+	114	15829	7	0.070444	700	-9.53177	1	1	0.070444	100	-0.455241	1047	85	Yes	NA	NA	NA	Yes	Yes
