# Supplementary material for: Polycomb-dependent differential chromatin compartmentalization determines gene coregulation in Arabidopsis
Source: HighWire-hosted journal article supplement (doi:10.1101/gr.273771.120), 2021-06-03
Supplement: Supplemental_Table_S25.xlsx [file Supplemental_Table_S25.xlsx]

## Sheet: HiC_Arabidopsis_Probes
	Supplemental Table S25: Probs sequences of C-Hi-C
TargetID	ProbeID	Sequence	Number of probes	Strand	Coordinates
Chr1:3544-3703	AJ_ArThaHiC209111033	TTAGATATACCAAACCAGAGAAAACAAATACATAATCGGAGAAATACAGATTACAGAGAGCGAGAGAGATCGACGGCGAAGCTCTTTACCCGGAAACCATTGAAATCGGACGGTTTAGTG	1	+	Chr1:3569-3688
Chr1:40494-40658	AJ_ArThaHiC2091110395	CCGCTTTAATTTTGGTTCCCTTTGCCTATGTCTTGGAAAGGTTTGATATGTTGATCGAAATAGGAGATAGTGAAAATTCTGTATTCTAACATGCAAGTAGAAATTTAGAAGCCACGAATG	3	-	Chr1:40527-40646
Chr1:66725-66927	AJ_ArThaHiC20911103302	GTTATGAGCAAGATCTCGAAGATATAATGATCATAAAGTTTTATTTTTTTGTTGTTGTGCAGCTTAAAAGAGAAATATCTACAATGAAACTGATTAAACATCCAAATGTGGTTGAAATCA	5	-	Chr1:66772-66891
Chr1:67096-67297	AJ_ArThaHiC20911103307	CTCGACCGAGAAAAGGTCTTCCGTCACAAAATGGTCGAACAGGTTCGTTAATTGTGTTTGGTTTGATCACGTAAAATGATTATGGATTTGTTTGTTTTTAAGTACTATAAAGAACAGTTT	3	-	Chr1:67178-67297
Chr1:67382-67546	AJ_ArThaHiC20911103316	TAGAAGAAGGAGAGATATTGAGGGAGAAGAATCACATTGATAGATTCGCCGCCGATCTAGAGCCGTTGATTTTCTTAATCGGAAAAAGAAAATGAGTGGAAGCAGAAGGAAGGCGACGCC	1	-	Chr1:67415-67534
Chr1:149638-149847	AJ_ArThaHiC209111031026	CATAAATAAAATAAATGAGCATAGATATTTTTCAAGAAATAAGAATAAAGAAAATTCTACTCTTAATGGCGGAAGCAAACACTCCACACATAGCAATCATGCCGAGTCCCGGTATGGGTC	3	-	Chr1:149639-149758
Chr1:149847-150078	AJ_ArThaHiC209111031033	CTAACAGCTTGCCACTCAGCAAGATGAAAGATTCCTACTGGACCAAAGCGGTTCCACAATAATAAACCAATTGATTTTACCACATACTTATCTTTAGTCCCGGTATGGGTCACCTCATCC	1	-	Chr1:149887-150006
Chr1:151720-151892	AJ_ArThaHiC209111031078	CCCAAATCAACCAAACGGTAAGGTTTCCTTCTCTGTTGGTATTCTCTTAAGTGATCATGAAGAATCGTACAACGACTTCTTTGTATTTGTTCATCATATGTAGAATCTTGAATCACCAAT	3	-	Chr1:151761-151880
Chr1:151892-152109	AJ_ArThaHiC209111031086	AGAGGAGCCAATTGCGAGGAACGAGGTGGATCACGAAACGCCAACGAAACCAGATGGTAAGGTTCTTTTCTTTTTCTATATTTCTGAGGAATCATATATAACCAAAAGCACTTCTTCTTT	1	-	Chr1:151954-152073
Chr1:175795-175969	AJ_ArThaHiC209111031158	TGCAGTTTTGTCGAAGATAGCGACTAACAATCAACACGGAGAGAACTCAGAGTACTTTGATGGATGGAAAGCTTACGACAAAGATCCTTTTCATCTTTCCCGTAACCCCCATGGGATCAT	1	+	Chr1:175820-175939
Chr1:176001-176220	AJ_ArThaHiC209111031167	ATCAAGCTAATACCTTTTTTTCTTCTTTTCAAGTCAAGTTAAATACTTAATAACACATTTTTCTAAACTTCTTACAGCTTTGCTTAGATTTGATCAAAGATTGGGTCAAAGAGAACCCAG	5	+	Chr1:176062-176181
Chr1:176220-176447	AJ_ArThaHiC209111031178	CAGATATCTTGTAATCAGCTACGGACATATTAGAAAAACAATTTTTACATGGAAAGTTAATAACACCTCTAAACAATCAGTTGATATGATCTGCATAAGAAAAACAAATTCAGTCGTGGT	4	+	Chr1:176293-176412
Chr1:176447-176639	AJ_ArThaHiC209111031185	TTTTATAAACTTATCCCTAATATAAATTTTGGAATTGAAGGCAATTGCACATTTCATGGGAAAAGCTAGAGGTGGAAGAGTGACTTTTGATCCGGAGAGGGTGGTTATGAGCGGAGGAGC	1	+	Chr1:176484-176603
Chr1:202899-203074	AJ_ArThaHiC209111031252	TCAGCCAGACAACTTCAATGATGTTCACATTGTCTATGAGTTAATGGACACTGATCTTCACCACATTATCCGCTCTAACCAACCGTTAACTGATGATCATTCACGGGTACGCATTAACCT	1	+	Chr1:202955-203074
Chr1:223196-223422	AJ_ArThaHiC209111031257	GTGGAGAGGATTCACATGATCTATGGGATACACATGATTTCATAAAAATCTAGAATAATGTTTTAGGATGATAAAATCCATAGTTTCAAAACACATACACGTATAAGTGAATTTAAGTAG	5	-	Chr1:223255-223374
Chr1:223422-223573	AJ_ArThaHiC209111031264	TGAAAGAGTTCGGCGATGACTCACCGGATCTTGGCCTCGGTGACCGCACCTCCGATCACGATTTCATGTCCATTTGCAAGGTTTCTCTATCTCTCTCCTCTCTCGTTTCATTTTGCATAT	1	-	Chr1:223442-223561
Chr1:247459-247654	AJ_ArThaHiC209111031611	TTTCAGCAAGTAGGCTTGAACAAAGTGAGATCGATGCAATCCAAGATTCAGAACTGAATACTTCAGTAAATAGCCTCTACAAGTACCGTGATATCTGCATAAACAAAGGGGTGAGTTCTC	1	-	Chr1:247499-247618
Chr1:249268-249432	AJ_ArThaHiC209111031803	CATCGTTTAGGGTTTTTGTTTTGTTCCGAATCTGGTTTGTGACTGGAGACGAGTGTCAGTGATCTGTATGTGGACATTGTTTTTGATCTATTACCAACTAATTTATCGCTTCCCAGGAGA	1	+	Chr1:249305-249424
Chr1:436154-436372	AJ_ArThaHiC209111031936	GAGGAAATCGTGAGAAGATCGGTGAGAAAAGGGTTTTGGTTTTTAAGAATCGAGATGGTTCAAAGACCGACTGGGTTATGCACGAGTATCACGCTACGTCCTTGTTTCCTAATCAGGTAA	1	-	Chr1:436205-436324
Chr1:436525-436727	AJ_ArThaHiC209111031949	CCGGCCAAAAAATCTCGATAGTGACACTAGCCATGTCGATGAAGTCATTAGCACAGTCGATATCTGTAGCTTCGAGCCTTGGGATTTACCTTGTAAGTCGAGTTATTTTTTCCCAAACTG	1	-	Chr1:436526-436645
Chr1:460168-460355	AJ_ArThaHiC209111032093	TGAACGTCGCTAGGATTTGGGGTTTCAACGAAGGAGATTACATTCCTCTTCAGATCTCTCCTGGCTCCTATAGTGAAGACGTTTTCAAGGTAACACGCATGCATATACATACATACACAT	1	-	Chr1:460224-460343
Chr1:480710-480934	AJ_ArThaHiC209111032259	ACTGTCAGAGCCCCTTCCGTTTCTCTCGACATGCAGAGTCTAGATTCCAGCGACACCATATAATATAGTTATTAGAAAACGAGAGGTCAAAACCATGTCCGGTAATAAGATCTCGACTCT	1	+	Chr1:480759-480878
Chr1:518344-518565	AJ_ArThaHiC209111032513	TGCGTATTTTTTCCGATTTGACGATGGAAGTAGATTTAAGGGACTATTGACTGTATCTATGGTTTTTAATTAGATTTCAGCTACTCTTTAACCATTTTGTTATTGGATCAGCAGCGATTT	4	+	Chr1:518393-518512
Chr1:520734-520917	AJ_ArThaHiC209111032619	TTGGCTTCTTCTTTCAACTATTGCAATGGCTACTCTGTTTCTTTACTTGGCTGAGATGAGAATCGATCGTACTACTGTCATGAAATTGCCCCCGAGGTAAACATTTGCAACTCTGTTTCT	1	-	Chr1:520798-520917
Chr1:521338-521506	AJ_ArThaHiC209111032643	CCGTATCAAAATCGAAATGGACCATTCTTGTACTAGCCATGATCCTCCTCTTGGTCTACTTAACCTTCGGGGTTTGCACATACTCATTCTTTCGAGACCAATTCTCCGGAACCGAGACCA	1	-	Chr1:521363-521482
Chr1:521506-521737	AJ_ArThaHiC209111032654	AAACCAAAAAACCTTTTCTTTCAAATTTGATAATCTCTTCAGAAGCTACCAAGAAGAAGAAGAGAAAGAAGAGCGTTTTCTAAATGGAAGAAGAGAACCTTCTCAATGAGAACCTTCTCC	3	-	Chr1:521522-521641
Chr1:524485-524677	AJ_ArThaHiC209111032744	ACTTGGAATTGAGGAAGGAAAGTTTTCTTTTTGGTTTCTTCATTGCATTTTTGGTGCTCTTGTTATTGTAGAGGTGGCTTGTTGGATGATCACGGGAGAGAGACAAGCCGCGAGGATAAG	1	+	Chr1:524522-524641
Chr1:552585-552783	AJ_ArThaHiC209111032901	GAGGACAGGTGGATAGATGGACGGTCAAGATCTACTGACGATTTAAGGTCATAAATGACGAAAAAACCCTTGTATGAAGGAAATGATGAAAAAAACTTAAAGTGTGTGGCTGCTGGGATT	1	-	Chr1:552628-552747
Chr1:562406-562579	AJ_ArThaHiC209111032986	AAAAACATACAGTCTTGTGTGTCTTTGTACTACTAGCTATGATCTCTAGAGCCATATCAAAGAATCGTAATCCCGAATATATAATGCTAAGATGTGACTCGTGTTGGTCTTGCTACCACC	3	-	Chr1:562436-562555
Chr1:562579-562745	AJ_ArThaHiC209111032992	GTTCTAAGTTTTGAGTGGGAAAACCCTTGAGTAACGCATTGATCATAAGAAGAAATGAAAGTAGTCAATGGAATATAAGGGTACTGAAAAGAAGAGTCCCGACCAATTTCATGAACAAAT	3	-	Chr1:562602-562721
Chr1:574476-574695	AJ_ArThaHiC209111033125	AAATAAGTTTTCTTTCGATGGACAGTTTGTGTTTGAATAGCGGTTTACACGGTGTAATTCCAGCGATCACTGCGGTTGGAAACGGCGGTTGCGGTGGAGTTGTTGAAGTCCGAGCAACTG	1	-	Chr1:574576-574695
Chr1:592416-592633	AJ_ArThaHiC209111033258	TGACGAATCTCAAAATTTACTATTTTGCCCCTGAGACCGTACAGTCTTTGATTTCATCTTCCGTGAGACAAGCCCTAGAGCAACCGTTGAATTACGCCAGAAATTACTTGGCGGATCTGC	1	+	Chr1:592453-592572
Chr1:618145-618391	AJ_ArThaHiC209111033405	CTTTCTTCAATCAGTTCTTGCTTCTTCTCAAACTCTATCAAACTCTTCAACAATCTGCAAAACGACGCCGGATCCAAAGTATTGCAAATCCGTTTTTCCACATAGCCAAGGCAATGTTCA	1	+	Chr1:618254-618373
Chr1:622037-622241	AJ_ArThaHiC209111033565	TAAGACTTCTTATTGCAGAATCTGAACTCTTTGGATGATTTATGTTCTTTCTCCAATCATTTAATTTTTCAATCAATGCTTTGTTTGTATCTCTTCTTAGGATCGAACCGATAAGTTGTA	4	+	Chr1:622074-622193
Chr1:623859-624021	AJ_ArThaHiC209111033612	TTCAAGCGAGAAGGCACCATGGGTTCCAGATCCTAAAACCGGTTATTACAGACCGGAAACCGTTTCTGAGGAGATTGACCCGGCTGAGCTACGAGCTATTCTCTTGAACAACAAGCAATA	1	-	Chr1:623866-623985
Chr1:663239-663413	AJ_ArThaHiC209111033743	AACACAAAGAATGTGGATGGCTATCGAATCTTTTGAGTTTGATCCACTCACATCAACACTGACCTGGGAACAATCCATCAAGCCTATGTACGGTCTAAAGACGGACTATAAGGTTGTGAA	1	-	Chr1:663270-663389
Chr1:663413-663577	AJ_ArThaHiC209111033748	GGGGGTCTTAAGTTGACTGGTGAGTTTAAAACTACATTTTCAACTAATTAATGATCTAATGAATTTTGATATAATTTGTTTTCGTCAGAATCTCGAGCTATATCTGAATACATAGCGACT	4	-	Chr1:663446-663565
Chr1:663577-663818	AJ_ArThaHiC209111033757	TTACGATCCCATCACCGTCAACTTGATAGCCGGTGACCAGAAGAAGCCGAGTTTTCTCGCTATCAATGTACTTTTCACATCTAAATATCTAACTCTGCTTCATGATTAATGGTTAGGTCT	1	-	Chr1:663639-663758
Chr1:843977-844142	AJ_ArThaHiC209111034081	AGTTAAGGACGTAGAAAAGCAAAAAAACAAACAAAAAAAAGACCAAGAAGCAATGGAGTCAACTGATCGTTCAAGTCAAGCAAAAGCTTTCGACGAGGCCAAAATCGGTGTGAAAGGGCT	1	-	Chr1:844023-844142
Chr1:846884-847073	AJ_ArThaHiC209111034162	AAGTGGTTGAACCAAGAAAGACTTCACCGATCTCCACCGACGTCCATAACCAGGAAGAAACGGAAGAGAAGCCTCTCATCCACCGAGAAAGGGCCACCGCTGCCACGCTTACCGGAAAAA	1	-	Chr1:846918-847037
Chr1:847308-847485	AJ_ArThaHiC209111034169	CTACTTTGCAACACAACCACCGGAACGAGATCATTGGCCGAAGTATACGAGTCCTGCCGCAAATCTCTTACCAATGAGCTGGCCGGACCTGCAACAAACCTAACGGAAAAAACCCAGTTT	1	-	Chr1:847330-847449
Chr1:859398-859586	AJ_ArThaHiC209111034251	CACCACAAAATATTGTGTTATGGCTCCTGATCAATCTTATCAATATCCATCTCCTTCGTATGAATCGATACAGACCTTTTACGATACCGATGAGGATTGGCCGGGTCCTAGATGCGGCCA	1	-	Chr1:859431-859550
Chr1:891337-891513	AJ_ArThaHiC209111034323	CGAGAGGTCATGAGGCTGATAAGATTACGTATATGACTATGATCCAGGCTTGTTATGCAGATAGCGACTTTGGTTCTTGTGTGGCTTTGTATCAAGAGATGGATGAGAAGGGAATTCAAG	1	-	Chr1:891370-891489
Chr1:898516-898755	AJ_ArThaHiC209111034482	ACGCACAATGACTCATCATCGCGTGGGCTTTGACATATGGGCCTTATCTTAATCGGGCTTTACAATTAAACCAAACAGATATAAAAACAAGCAAATCCTGACCTGGCAGTGGATCTTCAT	1	+	Chr1:898577-898696
Chr1:958859-959013	AJ_ArThaHiC209111034960	CTCGTATCGCTGAGTGCCTAATTGGTGACGATACTGGATGCATTCTTTTCACCGCTCGCAACGACCAAGGTAAGGATCTTAATTATTTACATATATAAGTTCTCTTGGTTAGGGTTTCGT	1	+	Chr1:958872-958991
Chr1:960081-960306	AJ_ArThaHiC209111035065	ATCTGAAGATTCGGAAGATCTCAATGAGCCAAAGGATAAGTACAACAACAACAACAACAATAATGGATACACTTACACTACTAACAATTATAATGACAATGGGAGAGGTTACGGTAATGA	3	-	Chr1:960139-960258
Chr1:969271-969474	AJ_ArThaHiC209111035196	TGGTGATCTTACCGGCATTAAGAAACATTTTTGTCGGAAACATGGCGAGAAAAAGTGGAAGTGTGAGAAATGCGCCAAGAGATATGCAGTCCAATCTGACTGGAAGGCTCATTCCAAGAC	1	-	Chr1:969295-969414
Chr1:969474-969708	AJ_ArThaHiC209111035204	TATAGATCCAGAAGCTGAGGTCATAGCTCTATCTCCAAAGACACTTATGGCCACAAATCGTTTCCTCTGCGAGATATGTGGAAAAGGGTTTCAAAGAGACCAGAATCTACAGCTTCACCG	1	-	Chr1:969529-969648
Chr1:970042-970230	AJ_ArThaHiC209111035212	CACATATGGGGCTTAAGTGTGTAGGGTGTATATATAAAGTGATCACCCAATATAACTTATCTTTTGTGTTTGCCTCTCATTCATAACTACATCAGATTCTAAGTATTTCTATTTATTTTC	4	-	Chr1:970087-970206
Chr1:970326-970534	AJ_ArThaHiC209111035219	TGAGGATGATGAAAAAAAGAACGGAGAAAAGAAATAATGAGATCATCATTCCAAATAGAAAAAGGCAGACATAGAAACTTTTGTGTGTGTCATGACGCACTGCCACTGAAAAACCAAATA	3	-	Chr1:970391-970510
Chr1:983061-983239	AJ_ArThaHiC209111035412	GAGCCTGCTGGTCCCATCAACCTCACTGCGATCCTCGAAAAAGGTGGTCAATTCACTACTTTCATCCATCTTCTAAACATCACTCAAGTCGGTAGTCAAGTGAACATTCAAGTCAATAGT	1	-	Chr1:983084-983203
Chr1:983239-983413	AJ_ArThaHiC209111035417	CACTCCAAACATTCAACTTCCATATAAACCATTCCCTTCCGATCTCACTTTCCAAATCACTCTTCACACTTTAACTAAGCAAACCAATAATGGCTACCACTCGTCTAACTCTAGCTCCTC	1	-	Chr1:983270-983389
Chr1:993711-993925	AJ_ArThaHiC209111035494	AGAATTTATTTGCCAGTCTGAAATTGGAATCATCCGTTTCTGTCGTTCTGGGGTTGGGTTTTTTTGACGTCGTTGTAGTAGAATCCGGTTTGCCATGTGATCTTAATACTGCGATTAGCT	1	+	Chr1:993760-993879
Chr1:1070396-1070615	AJ_ArThaHiC209111035570	TATTTTTGTATCTCTGTGATCGCTTCTACGTGTTGGGTCATGCAGAGAAACTCATTTTGTTTTGATTTGCAATGTGTCAATTCCACTTTGAAATATAAGATTCATCGCCTCTCTCTCCTT	3	-	Chr1:1070448-1070567
Chr1:1070910-1071132	AJ_ArThaHiC209111035580	ATCACCAAAAAAGTCAGATCACATACAGACACATTGACGCATCGACGTCAAGCATCGTGAGCGCACAAAGAGCTTACGGCTTTATTATTAACACACACACTAAGCAAAACAGTAAGTCCA	1	-	Chr1:1070965-1071084
Chr1:1136962-1137182	AJ_ArThaHiC209111035720	GTGAAGGTATCAATGGACGGAGCACCGTACTTGAGGAAAATCGATTTGAGGATGTATAAAAGCTACGATGAGCTTTCTAATGCTTTGTCCAACATGTTCAGCTCTTTTACCATGGGTACG	1	+	Chr1:1136963-1137082
Chr1:1161351-1161514	AJ_ArThaHiC209111035768	CACAAATACATAAATATTTGAATCTTTTTAATTGTATGCCGATCATATTGACAAATAGCATATTTTATTTTTTTTAACATTACCATCTTTATGCAGTATGTATGTTGGGTTTGATGTTGT	6	-	Chr1:1161371-1161490
Chr1:1168273-1168454	AJ_ArThaHiC209111035930	TCTTACTTGTAAGTTACTACATCTTCGTGATCAAATGCTGTCTTAATTGGCACCAAATCGACATCTTTCGCCGCCGCAGACGAAGCAGTGACCAAAACCCTCTAATGATTTACTCTCCTC	1	-	Chr1:1168299-1168418
Chr1:1168454-1168645	AJ_ArThaHiC209111035934	TACTGAATATTTCCCTTCAAATCCTAGAGGGAGCTTTTCATTTAGATTGTTTTGTAGTCAAATGGATCTAACAGACCGTCGTAACCCTTTTAACAATCTTGTTTTTCCGCCGCCGCCTCC	1	-	Chr1:1168526-1168645
Chr1:1168645-1168820	AJ_ArThaHiC209111035941	CTCTCTTTCATTTCATTACTTCATCTCTGTTTTTCTTCTCTACCACTATCTCTTCTACTATTCTGATCTTTCTCTTACACACGCAATTACGTATATATAAACACTTTCAGAGTAGGGAGG	3	-	Chr1:1168701-1168820
Chr1:1168820-1169026	AJ_ArThaHiC209111035951	CCAAACAAGTCACATAGATCGAGGAAAAAAAAAAAACTCCTAAAAGATTCAGCAAAATGATAACCTAAATGATGAAAAAAACAAAGTAAGATGATAACCTAAATAAATAAATGAGTCATA	5	-	Chr1:1168859-1168978
Chr1:1236739-1236939	AJ_ArThaHiC209111036177	TAATCAAAAGGACACATACGTAAGTTGAAATTGGAAAGAGTTCTTCACCAAAGCTAACTTGATCCTCACGAACGTCTCCTAAAATAGCAATCTTCAGCTGAAGAACAACACACGCCTCCT	1	+	Chr1:1236812-1236931
Chr1:1236939-1237172	AJ_ArThaHiC209111036187	CTACCTTCTTCTTCATTCATCATTCACTTCTCAGAATTTTGAGAATTTTGAATTGAGAATTGCGAGAGAGATCTCATTCTCCCTCTCGCAATTCTCCGTCCCCTCGAATCCAACAAAAAG	1	+	Chr1:1237036-1237155
Chr1:1395572-1395790	AJ_ArThaHiC209111036267	CCAATTCTAGTTTCTTACTCTCCAAGAAACAAAGAGCACCGATCTCAGTTTTCTCGAGAAACAGAGGACAAACTCAGAATGGCGGGGAACGAGTGGATAAATGGGTATTTGGAGGCGATT	1	-	Chr1:1395647-1395766
Chr1:1395790-1395985	AJ_ArThaHiC209111036278	CCACACATGCAACTACTAAACTACCGATGATCTCTCTCGCTCACGTTTAATCCGCCATTTCTGTAAAATCCTCTTCCCTTTTCTGAAGTAAACTTTTTCCCGCAATCAACTCTTGCTTTC	1	-	Chr1:1395830-1395949
Chr1:1553458-1553680	AJ_ArThaHiC209111036756	CCACTCCCTCTCCACATTTTCTTTTTCAAATAAAAAGACTCTCTCTCTCCCATTTACATCTCTTCATCTTCTTCTCTTTCTGCATTTTGTGACTAAATTTGTTCCGATCTCCGAAAAATA	3	+	Chr1:1553507-1553626
Chr1:1553680-1553833	AJ_ArThaHiC209111036763	TAAGCATATCCACACCTCTTCTGGTCTTTTATGATATTTTTTCTTATCTTTTTTTAAAAAAACTTATATAATTGATCTTTGATCCAAGTTGTCTCTGTTTTTCAATTTCGGGATTTGGAA	5	+	Chr1:1553693-1553812
Chr1:1554184-1554368	AJ_ArThaHiC209111036782	GCTACTAGTTTGGTGAGCATTTAATATGTGTTTTTTTTTTATTTGTTGGGTAGTTTTTATTTATTGACATCATAAAGTTTGATCACATTGTAATTTAGATGATCATAAACCTATTAGCCA	5	+	Chr1:1554221-1554340
Chr1:1622687-1622933	AJ_ArThaHiC209111037088	TTCTAGGATAATGAGAGATCTGAATGTGGAGAAGAAATCAGGTCCCAGCTCCTCTAGGTTAACAGATGGGTCTGAGCAGAACCCATGTCTGAAAGAGAGGTCTTTTAGGGTTAGTGATTT	1	-	Chr1:1622766-1622885
Chr1:1635312-1635463	AJ_ArThaHiC209111037237	TGTACCGCTGCTCTTAATCCTTTTGCTCGTGTTGATTTCCTCGCCAAGATCTGGATCTGTCCTATTTGCTTCCAGAGAAACCACTTCCCTCCTCACTACCATGTTATGTCCGAGACTAAT	1	-	Chr1:1635332-1635451
Chr1:1635813-1636053	AJ_ArThaHiC209111037244	TTTGGATTGGCCAAGTGATCTCACATATTCTAAAATGTGAGAAAAACAAAACAGTATTTTGAATTTTTTTTATTTAATAGAAGATTTGGTCAATTGTTAACATAAGTTGATGATGAATTA	6	-	Chr1:1635886-1636005
Chr1:1637127-1637361	AJ_ArThaHiC209111037280	TCCGCGATCTGCCTTCTTTCCTCTCACCTTCCAACACGAACAAAGCCGCACAAGCAGTATATCAAGAACTGATGGATTTTCTCAAAGAAGAATCTAACCCGAAAATTCTCGTCAACACAT	1	-	Chr1:1637182-1637301
Chr1:1637530-1637716	AJ_ArThaHiC209111037291	CTATGATCCCAAACCACAACAACGTCGAAAATCTCTCTTTCCTTACTTTCTCCGACGGATTCGACGACGGAGTCATCTCCAACACCGACGACGTCCAAAACCGGTTGGTACACTTCGAAC	1	-	Chr1:1637537-1637656
Chr1:1639697-1639903	AJ_ArThaHiC209111037443	TCATAATTCTGTATGTATCAGCGACCTTTTTACTCCCATGGCTTCCAAATCAAACACAAAGATAATTCCTCTGCCTCTGCTTACTACTATGATCTATGGCCAAACAGAAGCTGTCTGGAA	1	+	Chr1:1639746-1639865
Chr1:1639903-1640111	AJ_ArThaHiC209111037453	CCGGTCGTGACCACGGTTGGACTAACAAACAAATCCCTTTCATCTGCTCGGAAAACTCAAATCTTATGTACTCGAAGAGAGATCAAAGGTTTTATTTGCCTGCTCCTGGAGGCAATTACT	1	+	Chr1:1639964-1640083
Chr1:1640180-1640416	AJ_ArThaHiC209111037462	CAAATGGTAACGTGCGAGTCTAACATGTAGACAGAAATCTTGGTCAATGCTAATTTGGGTCTTATATGCGTGTGCAGGTACTCTCACATCCCTTCTCAACGATACAAAGATCCGATATTG	1	+	Chr1:1640241-1640360
Chr1:1691235-1691422	AJ_ArThaHiC209111037751	TAATTCAGGCACATTTAATTTTCAATATGATCTATCCATGCCATTTTTAGGAATTTATTTTATAAGCATATAATAACTATTATGATAATGATTTTTGGACAAGGAAATGGATTCTTTGGT	6	-	Chr1:1691267-1691386
Chr1:1706531-1706743	AJ_ArThaHiC209111037870	TATCATATTAATTGGTCGGTCGTCGGTGTTATATTTTCACCGGCTAGTCGGTAAAGATAATGTGCTTATATTTGGTGACAAGGATTCACTAACTTTGATCTTTGGTGCAATTGAAGATCA	3	+	Chr1:1706580-1706699
Chr1:1726679-1726882	AJ_ArThaHiC209111038049	CGGTGGTTTTGCCATGGCTGGAGTTATGCACAAGTTCCTTATTGCGTCAATGTTCATGTGGATTCTTCCTGTTGCCATATTATACGGATTCAACCACAATTTGCTTCCTGGTAATTAATC	1	+	Chr1:1726680-1726799
Chr1:1730133-1730300	AJ_ArThaHiC209111038089	TTAATTTTGATGAAAAGGAATTTGTAAAGAAGCGGTTCTCGTAATTTTTCTTCGGAAGTTGTCAAAGAACCGGCAGATCCTCGCTGCTCTTGCATTCGCTCACTACGGTAACACTCTATC	1	+	Chr1:1730158-1730277
Chr1:1730957-1731161	AJ_ArThaHiC209111038118	ATGTACAACTCTTTTGGCAACGGATTTTCGTTAGTTCTAAGCATTTTGTCGGTCCTGTCGTTCACTTGTCTTTCTCTTGTCTTATAAACATTACTGAACAGATCAAGGTAGATACTGGGT	3	+	Chr1:1730994-1731113
Chr1:1790311-1790535	AJ_ArThaHiC209111038196	TCTCCTCCAGTTCTTTGGCTAATGCAATCGGATAAACAGTCGTTTTAGCAGTTATTTGCAAGGATTTGTTTATATTTCTCAACAGTAACCGTAGATTTGATTGAGGATGATCATTTTCCG	3	+	Chr1:1790360-1790479
Chr1:1790808-1790968	AJ_ArThaHiC209111038216	AAATTGCATGGTCGCTCATACTTGTACTACTCTTCACCAAACATGTTACATAATCGGAAAAGAAACACAAAGACAAGAACGGCAGCCTCTCAGATCGCAAAGATGCTGCACAAAGGAAAC	1	+	Chr1:1790809-1790928
Chr1:1790968-1791134	AJ_ArThaHiC209111038222	GATATTGCATCAATACTCTAATATCTGGCACTTCATCTTTTATAGTTTTATCCTTCAGTACATCATTGGTAAGTGGATATACATATGATCATCTGTTTTTATCTTGTCTTGATTTTCTAC	5	+	Chr1:1790981-1791100
Chr1:1791134-1791321	AJ_ArThaHiC209111038230	ACCGTTTTTTTTTTGTCTCATTAAACCAGAATGTTTATACATTTGCTAATGACGTACAGCCAATTGCATCTGATCTCCGGCGTTCCACGAGGAAGAGAAGAATTTCTGTAAACCTGGAGG	1	+	Chr1:1791183-1791302
Chr1:1827534-1827750	AJ_ArThaHiC209111038506	TGCTTGTTACACTTGGCGAAAATGGATGTCGTTACTACACTAAGGTAATGTACAACAAACATTCATGTGGATTCATCATCATCATGATGATCTTGGTGTGTGATTTTGATTGATGTTCTC	3	+	Chr1:1827595-1827714
Chr1:1828953-1829184	AJ_ArThaHiC209111038516	CTGGGATCAAAGTAGCTCTGACCTCAACTATATGTAGTAAAGAAATTGAGAAGAATCAACCTGAGCCTTCCAACAACCAACAGAAGGCTAATCAGATTCCTGCTAAATCCACAAGCCAGC	1	-	Chr1:1829005-1829124
Chr1:1829218-1829380	AJ_ArThaHiC209111038524	TTAGTTTGAATCTGCTCTGTTGCAAAGTTGTGATTTTATAGATCTTGTAGCAACTGTTGTATGTATGCCTTGTTGTTTAAGACTAGGGTTTGCTCATTATGTTCTTATGACTTGTAGGAG	3	-	Chr1:1829237-1829356
Chr1:1882857-1883037	AJ_ArThaHiC209111038602	TTAGTGCCACTTAGACACAATAAGAAAACCGTTAACAAGAAGAAAAAAAAAAGATCGAAAATGGAATATCAAACTAACTTCTTAAGTGGAGAGTTTTCCCCGGAGAACTCTTCTTCAAGC	3	+	Chr1:1882918-1883037
Chr1:1883766-1883984	AJ_ArThaHiC209111038651	ATGTCAACTATTTGCGTTACTGTTGGAAACATGTATAGATGTGTAGTTCTTTATCTTGGTGCTTAATTTTAATATTTATTTTTGCCATAATTCTACAAAACCGATCCGAGAACTTTAACT	5	+	Chr1:1883815-1883934
Chr1:1885685-1885929	AJ_ArThaHiC209111038661	AACCGTAAAGGCAGAGGATCGAAAAAGCGTAAAATTTTCCCTACAGAACGCGAGAGAAGAGTTCACTTCAAAGACCGGTTTGGTGACTTAAAGAATCTAATTCCAAATCCCACCAAGGTT	1	-	Chr1:1885762-1885881
Chr1:1886521-1886735	AJ_ArThaHiC209111038670	GCCAAGTCGGTAACAATATACCCTTCTCTTACTCTTTTATTCCTAATAACCTGATCATTAGATATACATTACAAGAATTCATCTAAGCTTAGACGATTTTTAAGTTGGTTAGAACAGATT	4	-	Chr1:1886604-1886723
Chr1:1947306-1947550	AJ_ArThaHiC209111038878	GTTTGGATATTATTTATTTCAACACTGTTCATTCTACAAAGTACAGTTTACTTGTAGATCTCTGAATTCACTCTCGGTAGGTTTCGGAGTATTCCTTTAGTTATGGTTTTCTTGGCCCAT	3	+	Chr1:1947427-1947546
Chr1:2025407-2025572	AJ_ArThaHiC209111038988	ACTAAGACATGTACTTCTTCTCATCTATCTTCGTCGTTGACTCGTGAAACTTTTGACAACTTGTAGTATTAAGATCCAACTTCAAACCAACGGCAATTGCATTTTCAGCTAAAAGCAATG	3	+	Chr1:2025432-2025551
Chr1:2025650-2025812	AJ_ArThaHiC209111038996	AATCACAGAGATTCCTTCGATATTTCGTGCACCTCCGGCTACTTTAACAAGTCCAAAACCACCTTCCTCCTCTGATTTCTCCATCCCCACAATCGATCTCAAAGGAGGTGGCACGGACTC	1	+	Chr1:2025651-2025770
Chr1:2125175-2125348	AJ_ArThaHiC209111039049	GAGATTTCAAGAAGAAAACTTTCAAAGAGATCACGAAGTTTGATTCAACGGAGAAAGCCTGTCGTGCAAGTAACCGAACCAAGGAAACACATATACCTCATCATCTCTCTGTGAAGGTCA	1	-	Chr1:2125193-2125312
Chr1:2125348-2125579	AJ_ArThaHiC209111039055	TCACGCTCACGCACATCCTTTGAATCTAGGATCCTTCAAATTTCACCAAGAAACTCTCTTCACAACATACAGAGCAAAAGAAAGACTGTTTACAAGCCTTCTCCTCCTTCCTCTTCTATT	1	-	Chr1:2125424-2125543
Chr1:2125579-2125822	AJ_ArThaHiC209111039073	TGAGCCCAAGTGAATGGTTCCACAAGCTCAAGAACATGACAAAACCTAGAAAAAAGCATTCTCTTCCTCTTTACTCCATAAACACTACCAAGAAGAGAAAACCTTCCTCTGAGTCAAAGT	1	-	Chr1:2125583-2125702
Chr1:2174597-2174761	AJ_ArThaHiC209111039090	ACCCTAGTTCTGAATGGAATCGGCGGATTCCGGACGATCCGATCCGGTAAAAGGAGACGACCCGGGTCCATCTTTCGTCTCTTCACCACCAGCTACACCTAGCAGGTATGAGTCACAGAA	1	-	Chr1:2174618-2174737
Chr1:2254861-2255072	AJ_ArThaHiC209111039295	ACAGGTCAAGTCTTTCTTTGCTGTGTCATTGCTGCTGTTGGTGGTCTCATGTTTGGTTACGACATCGGAATCTCAGGTTTGTTCTTCTATTGGTTTTTGTTTGTTAGGGTTTGACTGTTT	1	+	Chr1:2254862-2254981
Chr1:2259048-2259296	AJ_ArThaHiC209111039347	TCACCGGGTTACTGAAAGAGATCTGGAGGATCATTTCGCTAAAGAAGGAAAGGTTGTGGATGTTATCTTTAATTTTGAACACAATTCAGTTTCGAGTAGCTCACTAGTGTATAATGTTTA	3	-	Chr1:2259141-2259260
Chr1:2287532-2287726	AJ_ArThaHiC209111039616	CCAATGATTGATTAATGATCAATCAACTTTGTGTTTGCTCCACTTATCTCTTCACATCGTACACTTCAAGATAAGAGAGAAATGGCTGGAGCAGAGCAAAGCCAGAGATGGAGCCTTAAG	1	-	Chr1:2287559-2287678
Chr1:2346411-2346631	AJ_ArThaHiC209111039898	CACTTCCTTCTTCTTGTTCTTGAATATTGATCAGGTCAGTTTCTACCGTATAACTTTTTAACGGCTTTTATATATTCTTCTTTTGCTTAGGTTTATCAAAATTATGGAACAAGAAAGATT	5	-	Chr1:2346476-2346595
Chr1:2435190-2435366	AJ_ArThaHiC2091110310068	CGCGTTTGACAACAGAGTTGATGCTAAAAGAACTCTCCGAGAGATCAAGCTCCTTTCCCACATGGATCATGACAATGTAATCTCTTCTTCTTCACTTTGATGAACACTCATATAGTTGGC	1	-	Chr1:2435247-2435366
Chr1:2435735-2435897	AJ_ArThaHiC2091110310092	CTTGTAATAATAATTCTCATTCAAATTTCGAAGTTCAACGGATCAAATAAAAAAGTTTGTCTTCATTTGGCCCACCAAAAGCAAAAGGTGCCACCATTTTCTCTCCTCTTACTCACTGCT	3	-	Chr1:2435754-2435873
Chr1:2628158-2628320	AJ_ArThaHiC2091110310167	TTTCAGGTTTGTGTATGAATAGAGATCGTCCACTCCATCTGATCAATTGCCAAGTACTAGCTTCACCCTTGACAGCTATAAAGTTAGTCAACTAAATTTTCAATTTTCTGTACAACTTTT	3	-	Chr1:2628177-2628296
Chr1:2628337-2628527	AJ_ArThaHiC2091110310173	TCTTAATAATCTACCTCCATTTTCTTGTGATCGGTCCAATTAATCTTATATCCAATCATCTTATTTATCTTCTACATATTGGATAAGGCTCTTTTATTCTTTACCAAAGATAAAGCTCCA	5	-	Chr1:2628372-2628491
Chr1:2631721-2631889	AJ_ArThaHiC2091110310274	AGTTTGATTATGTATGTGTGTGTGGGTTCAGGCTTGGTTCAGAGAGCTGCCGAGAGGGGTACTGGATCCTCTGCCATCGGAGCAAGTGATGCAGTGTGAGTCAGATGAGGATTTTGTCAA	1	+	Chr1:2631758-2631877
Chr1:2715375-2715574	AJ_ArThaHiC2091110310366	ATTTAGTTGTCTTGCTTAATTAATAGCTGATCTCTTCCGTCTGGTTTATCAGCTGCATCAGAAGACTCCAAGAAATCCCCCAGAAAATTTAGCGTTAAGAAGAGCTTGAAGTTGAACAAA	3	-	Chr1:2715419-2715538
Chr1:2842092-2842279	AJ_ArThaHiC2091110310463	CACTTCCTCAACCATCGCCAACAATGCGGCTCACAACGACGCCGTCGATTTTTTCTTCAGATCTCGTGGTCAATATCCTCTCTTTTCTCAAATCGAGGTACTAAAGTCAGGTGTTTTTTA	1	+	Chr1:2842153-2842272
Chr1:2842279-2842452	AJ_ArThaHiC2091110310467	GTCACATTTGGATTAGTCAACCAAGTTAACAATTTGTGAATTGAATATTGCTTAAACACTAGATTATTGCTTTTGTTTAAGGATCCTTGTTCTCCTTTTTTTTATCCATACTGGATAAGA	5	+	Chr1:2842304-2842423
Chr1:2889130-2889328	AJ_ArThaHiC2091110310562	TTTCTCGGAGAAGAGAGGGTTAAGAGACGTTTTCAGGCTACAGGTGAATCTGGCGGCAGCGAATCTTGTGGTGGAGAGTGGTCGGAGGAATGTTGATCGGACTGTGTACGTTGTCTTCAT	1	+	Chr1:2889167-2889286
Chr1:2984829-2984988	AJ_ArThaHiC2091110310840	GAAAAATCAATAACCTCATAGTGTCGACATGGGTTGCCAAGACGAACAATTGGTGCAAACAATATGCGATCTCTACGAAAAGATCTCAAAGCTTGAGAGTCTAAAACCATCCGAAGATGT	1	+	Chr1:2984854-2984973
Chr1:2985002-2985194	AJ_ArThaHiC2091110310846	AGATGTGTGACAGAGTCCAAGAGATTCGACTTAATCTCATCAAGATTTGTGGTCTAGCCGAAGGTCACTTAGAAAACCATTTCTCTTCGATCTTGACCTCTTACCAAGACAACCCACTTC	1	+	Chr1:2985039-2985158
Chr1:2995188-2995369	AJ_ArThaHiC2091110310870	TATGTGTGTAATAGACTTCTGATGGTTGCTTGTAACACGGTTTGATAAACAGAGCGTAGTCCTCCAATTGATGAAGTGATCAAAGCTGGGGTTATCCCTCGATTTGTGGAGTTTCTTGGA	1	+	Chr1:2995225-2995344
Chr1:3003941-3004133	AJ_ArThaHiC2091110310954	TGTTTTCTTCGTAATTTGCCTCCTCCTTGTTGGGATTGTTCATTACCATACTCTGTTCCTGAAGACTTGTATATATTTGAGGATTAAAGATCGAATTTTTTGGGTTCCCTCCAAGTGCAT	3	+	Chr1:3003978-3004097
Chr1:3028929-3029094	AJ_ArThaHiC2091110311104	TCGCATTTTTTCTCGAACGGTAAAAAAAAAACCATACTAATATCTGCCCATATACATCTTATTTGATCAACTAACGATTTTAGACATGTATGAATTACACGATTAAAACAATTGCATCGA	5	-	Chr1:3028975-3029094
Chr1:3060996-3061222	AJ_ArThaHiC2091110311260	ACAGTACCCTCCAGTGTATGAAGGATTAAGATTATACACCTCTTTGTTACAATGTCTGAGTTATTATTAGAGAAATCTAAGGTATAAAAATAAGGGTATTTATGAGCGTAAATTATTGGA	4	-	Chr1:3061019-3061138
Chr1:3061339-3061576	AJ_ArThaHiC2091110311271	TAGAATTTTGCCTACGCGAAACACGCATCCAAACTCGAAAACTTCAAAAGGTAAACTCACTTGCTTTTACTAGGGATAGTAATTTTATGAATACAGTACCAATTTGAGCTGTTCTTTCTG	3	-	Chr1:3061361-3061480
Chr1:3076102-3076254	AJ_ArThaHiC2091110311619	AATGAACACTATTTGATAAAACAATACATACGCAATTATCATTGTCTTTAATTTTTATCAAAGTAATCATACGATCGACTATTTGTATGCAAAAATTCATCATTTTATTTGCAAAAAAAA	6	+	Chr1:3076115-3076234
Chr1:3091371-3091559	AJ_ArThaHiC2091110311704	AGCCGCTGAAAATCCAGGTTTTTCTCAAGATCCCTTATTGAGAACAGAAATGTGATGTGTTGGTGAAATGGTTAAGGAATATTCTCCTCTTCTTTGATTTCAAATCATTATTGGCAGACT	3	-	Chr1:3091404-3091523
Chr1:3091642-3091816	AJ_ArThaHiC2091110311708	GTCTGGATGGGTCAGTGCCTGGATATCATTTGTGTCGCGGGTATGGTTCAGGAGCAAACAACTGGATCATTCAGTTGCAGGTTCTTACTTAAGATATAGCAAGCTCTTTGTATATAAACT	1	-	Chr1:3091697-3091816
Chr1:3091816-3092026	AJ_ArThaHiC2091110311714	GAGCGGGTAACAATTTTCTTACCATTCATTTCGATTGAGATTTAGATTTCTGATATGCATGTTAGATCTCCAATGTTTCAAACGTTAGTTTTCAAGTTTTTTTTACGAAATTTCGTTTGT	4	-	Chr1:3091907-3092026
Chr1:3223813-3223992	AJ_ArThaHiC2091110311950	AAATAAACGCCTTTTCAGTTTGTTTTAAGACCTGTTCTACAGATCCTATATCTATGACCATTTCAAAACTCTTGTTTTACACAAGCACTTATGAAACTTTGAGTATCTCGTGCTGCTGCA	3	-	Chr1:3223849-3223968
Chr1:3232926-3233121	AJ_ArThaHiC2091110312039	TGATGATCACGAACACGAAAGGACGAAGAAGAGAAGAAGAAGAACCTTACAATTGCTTTTGTAAATATTGTAGGTAGTTTAAGGACGTCACTACCTACATACATGGATTTATGTGGAACT	3	-	Chr1:3232942-3233061
Chr1:3240758-3240973	AJ_ArThaHiC2091110312092	TGGTGGAGATTCTTACTCCGCCGCAAGCGATTAAAGTGTTGAGGACAATCGGACAGCTTCACCTCCGTCTGAGAGACAGAGACCAAGAAAGAGCTTAAAAAAAAAGATACTTAATTTGCT	1	-	Chr1:3240759-3240878
Chr1:3400975-3401149	AJ_ArThaHiC2091110312535	ATCCCCTGTATTCACACCGTTAAGTAACGGTAGCGGACGTGTTTCCCTCTGTGATCGTCAAAGCTCCTCCATTTGCACCTTCTTGTACTCAAATTGCAGGTAACCCAAAATTCAAATTCA	1	+	Chr1:3401030-3401149
Chr1:3404105-3404317	AJ_ArThaHiC2091110312706	ACTTCTTATGGGGTAGCATTTGCTGCTGCTCTCTCTCAACTTGTTTTCTCAACGATTGCTCAAGCTGCGAGCGACTCTCAAGCAGTTGTTGGAGAGGATCCGGCCTATACATCAGAGCTT	1	+	Chr1:3404154-3404273
Chr1:3449452-3449670	AJ_ArThaHiC2091110312715	TCTTTAGACATACAATATATTATACTATTACAGATGCAATGCATCATTAGTTACAAACTATTAAACTAAATATCCCCCGTCTCTCTCTTGCTATATAAAGAAGATCATTTACACATCTCC	5	+	Chr1:3449501-3449620
Chr1:3450428-3450599	AJ_ArThaHiC2091110312754	GTGATGTTGTGGAATTATTCAAAAAAAGAAAAAAAACTTTATTAGATGGCTTTACTAGAAAATTCTCGATCATCATCGTCATCCGATACAAAATAAAGTCAGGTAGAGGATCGAGCATTT	4	+	Chr1:3450465-3450584
Chr1:3530395-3530593	AJ_ArThaHiC2091110313165	GTCTAAGAAAATATCTTCTTGTTTTGTTCCTTTCAGCGCTATAACTCATAATTCTCTTCCAAAGTTCTTGGATTTGTTCCCCAAATCAACTGGAGATCTAAGAAGAAGAAGAAGAAGAGC	3	+	Chr1:3530432-3530551
Chr1:3550213-3550408	AJ_ArThaHiC2091110313310	CGTCACAGTTACCGAAACAGAGGAGCAAGATCAGTGTCCTACGACCCCTACGGCGGTTTCCGTCAGAATTCCAAGGGTCCCGCCGTGTCCAGCGGCGCCAAAGAAGCGTAAACCGTCGTT	1	-	Chr1:3550253-3550372
Chr1:3577974-3578142	AJ_ArThaHiC2091110313504	GCTTCTTCTTAGATATGATCCTTCTGTTTCGTACTTGTTCCTCCAACATTCTTTTCCTCTCTCTTCTTCTCTTGTCTTCTTCTTTTTCCTCTGTCTTGTCCGAGAATCTCTCACCTAGAA	1	-	Chr1:3577975-3578094
Chr1:3703265-3703440	AJ_ArThaHiC2091110313889	GGGTTACTGATTACTTAGGGAAGAAGCTAAAAGATGTTAGCATTCCCTTCATTATTGTGCACGGAAGTGCAGATGCTGTGACTGATCCTGAAGTGAGCAGAGAGTTGTACGAACATGCTA	1	+	Chr1:3703290-3703409
Chr1:3708854-3709086	AJ_ArThaHiC2091110314010	GTCTGATCGAAACTGAACTTTTGAGTGATTACTTCCAGGTTAGTCAAGAAATAATGTCTCCGGTTGGTTCATCTGTGGTAGAGTCTGGCGAGTTTAGGAACACACTGATGCAAAGTGGTT	1	-	Chr1:3708907-3709026
Chr1:3822870-3823026	AJ_ArThaHiC2091110314100	GAATATCTATGGTTTTGGTTATATATTTTTACAGCCGTTAGATCTTCAAACCGATCAATCTAACGGTTCTTAACAATATCCAATTCTCATAAGAAAAGAGTACAAAAATAAAAAGAGTCG	5	-	Chr1:3822895-3823014
Chr1:3824381-3824533	AJ_ArThaHiC2091110314127	ATCCCATAAATCTCTACAAAAATATCGACGATTGAATTGAGAAAAGTTAATGGATCTCTCATTATGAGAAAGTTTTGACTTTTGAGAAATCGGTATGACAATTATCTTCACATGATTTAT	5	-	Chr1:3824402-3824521
Chr1:3841266-3841516	AJ_ArThaHiC2091110314245	AGTCTTTGAAAGATGGTGATGTTATATACTCTGAAGGAAAGAGATTTGCTTTTGGATTCTTCAGCTTGGGGAATTCAAAGCTCAGGTATGTTGGGATTTGGTATGCTCAAGTCTCTGAGC	1	+	Chr1:3841303-3841422
Chr1:3866683-3866847	AJ_ArThaHiC2091110314313	AACCATAAACCGAGGCGAGAGAGGAGAGAGCGAGGGAGGTGATCTCTTACCACCTCTTCGTCTCCGGCGGCGAGAAATTCAGTTTCAATCGGAGAAGAGAGGAAAAACAAAGCGATACGC	1	-	Chr1:3866704-3866823
Chr1:3869417-3869650	AJ_ArThaHiC2091110314355	CATCTGCGGTTTCGGAGTTCTTGCTTGTCAAAAATGTCATGAGAGAGTCAGAGATCTTGACGCGTTTGAAGCACATTACCTCTCTAACCACTCTGGTAAGACTTGAATTAGATGAACTTT	1	-	Chr1:3869519-3869638
Chr1:3870327-3870529	AJ_ArThaHiC2091110314397	AGGTTGATCACATGTTTGACTTTTTTACTTTAAAAATGTCAAAGCTCAATAGAGGCAGCATGTGGCGTTATACTCTGTTTTGGAACGTGAAGAGAGGTGAAAATTATTATTCCCATATCT	3	-	Chr1:3870350-3870469
Chr1:3880109-3880265	AJ_ArThaHiC2091110314602	CTCTCTCTTCGAAATATTCGAAGTAGAGACAACCAATGGAGACGGAAAGGAGGATCATAACGAGCTGTTCTGCCATGACGGCTCTGTTCTTGTTCATGACGGCTCTAATGGCGTCGTCCT	1	-	Chr1:3880134-3880253
Chr1:3881921-3882134	AJ_ArThaHiC2091110314654	ATAGCCAGCTACGTCTTCCAGAGTTCCGCCGCGAATTCAGACTCGTCTCCGCCACTTTCATCACCAACAACAACAATGAATCTAACGGCACAAAGCTCTTCTTCTGCGAGATCGAATCAA	1	+	Chr1:3881958-3882077
Chr1:3883988-3884194	AJ_ArThaHiC2091110314767	GTTATTGAAAAACATTCGGCAATTATAGATTGGAAAAATCCATACAATATAAGACTATTAGTGAACGTAGATTCACATGATCCACTTTTTTAAAAAAAGCCGAATAAGACTTTTCTCTGC	5	+	Chr1:3884049-3884168
Chr1:3889131-3889365	AJ_ArThaHiC2091110314859	TACAAACTACATGACATGTTTAGAAAGTATTAGTGATGTCTCCGTCAACTCTAAGCAAATAGTCAAGCCACAACTCGAGGACTTGGTTTCTAGGGCAAGAGTGGCTCTAGCCATCTTTGT	1	+	Chr1:3889156-3889275
Chr1:3902471-3902658	AJ_ArThaHiC2091110314933	ATGAAGAGGATTAAAACGGAGAATGTTGAGAAAGGTTTCGTGGAGGTTATGAGCCAATGTAGGCTAACGATTTGTAGTATCTTGATCTGTCTTTGTTTCGGTGCCAAGATCAGCGAGGAA	1	+	Chr1:3902508-3902627
Chr1:3930818-3931051	AJ_ArThaHiC2091110314960	ATCTTTAAAATGAATAAAGTCTTCTATTTCATACCAAAAAAAATAAAGTCTTCTCTTTGGTCTTCAGAATCTAATCTTTGTTTTTTTAATGGCCGGTGACATAGCTTGGAATGGGAAGTG	4	-	Chr1:3930824-3930943
Chr1:3931064-3931296	AJ_ArThaHiC2091110314970	CTATGCTCACTCGTATCTTCGCTGGTCGTTTGGGAAGTATGCAACTCGCTGCCGCTTCTCTAGGAAACAGCGGTTTCAATATGTTCACTCTTGGTCTCATGGTACTTTACATTTTCATTT	1	-	Chr1:3931081-3931200
Chr1:3951667-3951828	AJ_ArThaHiC2091110315048	TTCGCTGATATGTTTGTATATCTCTTTAGATTCTACTTATCGGGAATTTAAGTGTAAAGTGTTCTACTTTTTCATAGTGAGATCGCCTTTTCGATTAGTATATCTTTAATTGAATCAATG	5	+	Chr1:3951680-3951799
Chr1:4045440-4045623	AJ_ArThaHiC2091110315168	TGAGAGACAAAAGACAAGGTTGAGAGCGAGAGAGAAAACTTGAGTAAGCATGGAGATCAAAGTGAAGACTCTGACGGAAAAACAAATAGACATTGAGATTGAGCTAACGGACACGATTGA	1	+	Chr1:4045501-4045620
Chr1:4048502-4048719	AJ_ArThaHiC2091110315276	CTTCGAAGAGGACTCTCTGAGAACCCAAAACATGTTTCTGCACAGGTCCAATGATCGTAATCTTCATTGACATGTTTCCTTGATTACTGACGTTTCTTGCGCTACACTCATTTTCACATA	1	-	Chr1:4048588-4048707
Chr1:4048719-4048876	AJ_ArThaHiC2091110315287	GATAAAGCGATGCAAGAGGAAGAGAATCCAAGCTTGTAACGATCAAAGAACGGCTAAAACAGCTATTGGCGTTATGGCGATTTTGGGTTTCTTTTGCCTCGTTAATTGGTTCATGCTCTC	1	-	Chr1:4048733-4048852
Chr1:4095287-4095442	AJ_ArThaHiC2091110315441	CACACTTAGCCCCAATGCTAATCATATCCTTACCTCTAGTCACATTAAGCAACCTTTATTAGGGTTTAACTAGAGATCAATGGAATCCAACAGAATTTTTCCACAGCTCTCTTCATATCT	3	+	Chr1:4095300-4095419
Chr1:4124948-4125113	AJ_ArThaHiC2091110315711	CTCTCCTCTGAGGTAAGTAATCCAATACCAACAACATGGATCATTAAAGTCTGATCAAGAAATGGTTCTATGATTCTATCATGGTTTTAGATGACCAGAATATGTCTAGGTAACAGATTG	3	-	Chr1:4124982-4125101
Chr1:4128938-4129119	AJ_ArThaHiC2091110315893	CGTTCGAAACTAATGGGTGGAAGAGTATGAATACCTTTTCTGAAGAAGGAGAGATCCGCCCATTAAGTGATGTGTCTTTGAATGGAAATTTATATTGGGTTGTTAGCAATGGCGAGACAC	1	-	Chr1:4128988-4129107
Chr1:4165334-4165584	AJ_ArThaHiC2091110316280	GGAGCACTGTCAAATCTTGTCCACTCTTTGATCTTATCTCGATCTCTTTCTCTTTCTAGTCTTGTGTAGTCTTCAAACTTGTGATGTTATCTATATAGTAATCACGAGAGAGAATCATAC	3	-	Chr1:4165441-4165560
Chr1:4260651-4260884	AJ_ArThaHiC2091110316307	AGCAAGCCCCTGTTCAACAAAACAATCACAAAAAGAATGTCAAAAAAGCAACGCTGCTTGAGGATGGAATCGCTGCCCCACGAGGTCGTAGAGCGCATCCTAGAGAAGACTTGCTGTGGA	1	+	Chr1:4260652-4260771
Chr1:4273636-4273801	AJ_ArThaHiC2091110316493	GCATCTCAACTAGACTACACCAAGGATTCATACACACCATTGCTTCTGAGGTAATTATCTATAATCTATCTTCGATCTGATTTATGAAGAAAGAGGGAGTTAATCTTTATATTTTATGTG	4	+	Chr1:4273661-4273780
Chr1:4275132-4275349	AJ_ArThaHiC2091110316670	ATTGTTACAGGTAAGTGGGAAGAGAGTTGGGATAGTTGGATTGGGGAGCATTGGATCATTTGTTGCTAAAAGACTTGAATCATTTGGCTGTGTTATCTCTTACAACTCAAGGAGTCAGAA	1	+	Chr1:4275229-4275348
Chr1:4275349-4275563	AJ_ArThaHiC2091110316673	TACCGGTATTACTCTGACATTCTCTCGTTAGCAGAGAACAACGATGTACTTGTCCTCTGCTGCTCTTTGACAGACGAAACGCACCATATTGTGAATAGAGAAGTGATGGAGTTGCTTGGT	1	+	Chr1:4275362-4275481
Chr1:4298774-4298941	AJ_ArThaHiC2091110316729	GAAAACCCTTCTCCGGCTTGCTACTAATATACGACTAATAGTATGAATAGTTCAATGGCTTCTGCCGGCTTAGGTAGCCGGAGAAAGGATCCGGTGTACAGAGGAATCCGGTGCCGAAGT	1	+	Chr1:4298787-4298906
Chr1:4298941-4299119	AJ_ArThaHiC2091110316735	TTACCCCATGGCAGAGATGGCAGCAGCCGCCTATGATGTGGCTGCTATGGCTCTTAAAGGAAGAGAAGCTGTCTTGAACTTCCCTGGATCCGTCGGGTCATACCCGGTTCCTGAATCAAC	1	+	Chr1:4298966-4299085
Chr1:4299119-4299299	AJ_ArThaHiC2091110316742	GAGAAAAAGGCAAAGGAGAAGAAGAGTAGTAGTTCGAAGTCGAGAGCGCGTGAGTGCCACGTAGATAATGATGTTGGATCTTCGTCGTGGTGTGGGACAGAGTTCATGGACGAAGAAGAA	1	+	Chr1:4299156-4299275
Chr1:4299299-4299473	AJ_ArThaHiC2091110316749	TCTCGGCCGTCGGATGACTCTCCGGAGAATTCAAATGATGAGGACTTGTGGGGCTATTGATCGGTTTGTGTTGTCCACGTACGTATATGTAATCATTATTTGTTCTTGTTGCTTTTTTTT	1	+	Chr1:4299348-4299467
Chr1:4299473-4299686	AJ_ArThaHiC2091110316755	TTTATTTAAGATTGTTTCTACTTTCTTGTATCGTTGAATTAGGGTTTGCGTTTGGAGTTTTTAGGGTTATCAACTAGGGCTTAATTAGCCTTATAGTGATCCTCCTTTAGTTTCGCGACT	3	+	Chr1:4299522-4299641
Chr1:4382571-4382746	AJ_ArThaHiC2091110316935	ATTGGTTTTAGTACAATCTGTTTGGAATCGGCTTCTATTCTGTCCTCCACTCTTATCACTTTCCCTCAAGGATTTCAACACCGGATCTATGCTTCTGAAAGCTGTGACGGACTTTTCTGC	1	+	Chr1:4382596-4382715
Chr1:4448405-4448638	AJ_ArThaHiC2091110317114	GCTTAAGCGGCATTGCAGGGTTAGTCATCCTGATAAGTGCTATAACTTCATGGTAAAGGAGATGGAGCCTAGAGGTTTTTGTGATGTCGTTTCGTACAGTACTCTGATCGAAACATTCTG	1	+	Chr1:4448466-4448585
Chr1:4449650-4449838	AJ_ArThaHiC2091110317123	CCACGCTTGTAGAACGTAACTCCACTGTCAGATGCAGTCTCGATTAAGTATCATGTTGGAATGTATGCTACCAATGAGGTTTTGGATCTTGATATGCCAAGAGCTTAAGACGTAACTGAT	1	+	Chr1:4449687-4449806
Chr1:4449838-4450036	AJ_ArThaHiC2091110317129	TTTGTTTCAGAACGTGCCAACCTTTTCCCTTTTGTCAGAATATTGTCATGATTCTGCATATTTTCATAGACTGACATATTCAATAACAAAATCAAGCTTTGTCTGGATCCCTATTGATCG	3	+	Chr1:4449863-4449982
Chr1:4450674-4450889	AJ_ArThaHiC2091110317178	TGAGACCGGAGGAACCATTACCACCACGCCATAATCCAAACTCTGCCAGGCCATTGCAATTGAGCCCTGAGGAGCAACGACCTCCACACCGTGGCTATGGATCTGAACCAACTCCATGGA	1	+	Chr1:4450723-4450842
Chr1:4462109-4462329	AJ_ArThaHiC2091110317283	GGTGGTCGAGCTCTTCAGCTCGAAAAAGCTTCAATCTTTCAGGTATATCAGAGAGGAAGAGAACGACTTGTGTGTCAAGAAACTCTCTGATTTAGCTTCGAGACGATCTTTGGTGAATCT	1	+	Chr1:4462158-4462277
Chr1:4462723-4462874	AJ_ArThaHiC2091110317289	TTTTGTTTTGTTTTACGTCAGGACATATTTCTAGCAGGAGTTGGAACAAGCTCCACTACATTGATATGGGCGATGACCGAGCTGATCAGAAACCCGAGAGTGATGAAGAAAGTTCAAGAC	1	+	Chr1:4462724-4462843
Chr1:4467883-4468039	AJ_ArThaHiC2091110317320	CCGAATCTCAGGTCAGAACAAGACACTAAACAATGTTTTCTCAGAACTTGACACTTTCTTCCAAAACGTGCTCGATGATCATATTAAGCCTGGAAGACAAGTATCTGAGAACCCTGACGT	1	+	Chr1:4467896-4468015
Chr1:4550586-4550783	AJ_ArThaHiC2091110317326	GGTTGTAAGAACAACATAGACCATCCAAGATCAAAGCCTCTCAAAGACTTTAGAACGCTTCAAACGCATTACAAGCGGAAGCACGGAGCAAAACCTTTTCGTTGCCGCAAGAAATGTGAA	1	-	Chr1:4550628-4550747
Chr1:4550783-4550936	AJ_ArThaHiC2091110317332	TTCAGGATATGTAAATTTAACGTGAAAAATGAAATGGACAAGTGTTTTATTCGATCACATCTTTTGCAGATGCATATGTGGGGTCATGGTTCGCAATACCGAAAAGGCCCAGAGTCGCTC	1	-	Chr1:4550805-4550924
Chr1:4557293-4557477	AJ_ArThaHiC2091110317401	AGCAGTTTCTAACTATTAAAGATTCATCGACATCCAACGAAGAAGAAGATGAAGAATTCGACGATGAGCATGGAAATCACGATCCAGACAATGATTCCGAGGACAAGAACACGAAATCTG	1	+	Chr1:4557330-4557449
Chr1:4557596-4557800	AJ_ArThaHiC2091110317408	AAAAAAAAAGTCTCAAAGAAAACGCTCTAATATTTGTGATTTGCGTTTCAGGAAAGGTTGCAGCAGGAGACGATGACAAGAGATGAGAGTATGAGAAAAGATCCGATGGTGAACGGTGGC	1	+	Chr1:4557633-4557752
Chr1:4665437-4665621	AJ_ArThaHiC2091110318142	TATACGTACGCATGAACTGTATTAAATTGATCACTTGTCTTTTTTTTTTTTTTTGGATACTAACGGTAGTTCATACATATTAATTGTCTTAAGTTTTATTGTGACCTTCTTAAGGGATAG	5	-	Chr1:4665466-4665585
Chr1:4690961-4691183	AJ_ArThaHiC2091110318508	TACTGATAACACTAAAGGTGAACATAATTCTTCCAACATAAGCCTCTCAGTATTGAGATATAGATGTGTTGATATATTGACATAAGATAGGCTTGATCTGCAACTCTTGACTATGTGGGG	3	+	Chr1:4691022-4691141
Chr1:4781808-4781994	AJ_ArThaHiC2091110318813	TGGCATCTGATTTTTGATTTCTAGACAAGATCATGTATATCTTGGTAATGGTCTTATTCTTGTTTTATGTCTTGATACAGGTTCCTTACAAAAATTTGATTTCGTTTGGTGAATGAAATA	5	-	Chr1:4781839-4781958
Chr1:4806356-4806534	AJ_ArThaHiC2091110318857	CGAGGGCTTTTTCTCGTCTCCGTGGCCAAAACCTTGTCTTGATCCCTCTTGCAGACTTGGCAAGCTATCTTCTTGTTTCAGATATTGTCTAGTGAAAACTTCAGAAAATAATCTTCATTC	1	-	Chr1:4806391-4806510
Chr1:4806635-4806820	AJ_ArThaHiC2091110318866	GTCTGATCATTGTTTAGATTCATACCAATTGGTCTGAGTAGCAGTAGCTGATGATGATGTACATTATTAACTTTGTGGTTACTGTTGTTTGGCTCAGGGACTCAACTGTTGAGCACCACA	1	-	Chr1:4806641-4806760
Chr1:4810755-4810969	AJ_ArThaHiC2091110318978	GATAAGTTTTACAGAAAGAAAGTTGAAGAAGTGTTGAAAGAAGCGGCGATGCTTAATAAACAGATGGACGCTTTGATCGCGTTTCGTGTTAAAGTTGAGAACCCAGATGGATGGAGATGG	1	+	Chr1:4810828-4810947
Chr1:4810969-4811210	AJ_ArThaHiC2091110318984	CTCTCTCTGCTTCTACTCCAGCCGGAGCTAAATCCAGTAAGCAATAATCAATACATATCTATCTACTCTTCACCTAACTCACCCACTTTGGACATAAAAAGACAGGAATTTGGTCCAAAT	1	+	Chr1:4811006-4811125
Chr1:4828597-4828836	AJ_ArThaHiC2091110319091	TTACGACGATTATGATAAGATGTTCTTCTGTGAAAGTGACCAAATTCTCATCAGGCAAGTCCCTTGGTTGGTCTTCAACTCGAATCTTTACTTTATCCCATCTCTATGGTTGATCCCTTC	1	+	Chr1:4828658-4828777
Chr1:4830412-4830571	AJ_ArThaHiC2091110319111	AAGTGAGAAACTGCTAGGAGGGCTTCTTGCTACAGGGTTTGAAGAGAAATCTTGCTTAAGTAGGTATGATCAGTCTATGAGCAAGCCTTCACCATACAAACCATCTAGACATATTGTTTC	1	+	Chr1:4830437-4830556
Chr1:4847237-4847475	AJ_ArThaHiC2091110319170	GACAATGTGGGTTGTTCTTTTTCCTTGATAATCTTCTTCGTGAAGAAAAAAAGTATTTTGGAAACTAAAGTTCAGATCTTTGCTTGTCGTTTGATGAGTGAGAGATTGCTGGGTAGGTAG	3	+	Chr1:4847334-4847453
Chr1:4847475-4847707	AJ_ArThaHiC2091110319179	ATGATTGAAAGTTTGAAACTTTGGTGCTATTTTGATTACTCAGGTGAGCTAAGCTAAAGAACAAGGAACAAAACCAAATTATGTGTTTGCGAGATCTGTCTCATAGTTTATGGAGTTGGA	3	+	Chr1:4847548-4847667
Chr1:4847707-4847864	AJ_ArThaHiC2091110319186	GGTCTATCGAGTGAATAGAAGTTAAAGTATGGGTTCGCTCTGTTGTGTAGCTGCGAAGTCAGATAGATCAAATTCTACAAGTGGGGACTTTTCATTTGGCCTGCATGAGCCTTATTGGAG	1	+	Chr1:4847732-4847851
Chr1:4847993-4848187	AJ_ArThaHiC2091110319195	TACATCTACGGAACTTGAACAGTGTATCTTTTTGTTTTTTCATTTCTCTATGCAGATCAGATTGTTAAGCAACTACCAGGTACATCAAGAAATGTCGGTATTGGTGACTCTGAACCTGGT	3	+	Chr1:4848066-4848185
Chr1:4850790-4850942	AJ_ArThaHiC2091110319221	TCTTGAAGCAGGGTTTTATCCGTATAACGGATATAGTTTGGAGCACACGCAAGGGACAAAGATCGGTGGAAGCATATTTGATCAGTGTGGGAAAAGACATACATCTGCAGATCTTTTGGG	1	+	Chr1:4850815-4850934
Chr1:4869305-4869539	AJ_ArThaHiC2091110319439	TGGCAATTGGAAGTGCTAATTACTGGGGGGAAAATTTTATTCAGGAACTGATGAAGGTATCTATGCTTGGGTTGTTGCCAATCACGCACTTGGTTCGCTTGGTGGTGATCCATTGAAAAC	1	+	Chr1:4869366-4869485
Chr1:4930073-4930262	AJ_ArThaHiC2091110319447	GTTTGTGGCTTTAGACGTAAGTCTCTATCCCAAAATTAAAGATCAAAGAGCTCTAACTGAATAATCATGCTTTGAGTTTTCCATTTGATTTCTGTTGTTTTTCTGCAGTCTGGAGCTTTC	3	-	Chr1:4930119-4930238
Chr1:4935082-4935313	AJ_ArThaHiC2091110319623	CTCACCGGAGACATTAACAGAACGAAGATAACTGCTGAGGTTATGGTATGCGGCGGTGCTCCGCCGGGAGCGTTCTTCAAAGCGGCGAGGACGATTCCTAAAATCTTCGTCGCGGGATCA	1	+	Chr1:4935131-4935250
Chr1:4999530-4999754	AJ_ArThaHiC2091110319757	GAGAAGCTTATTTTATGACTCGGTCTTACTTGAAGATGATGTGGAGAAGGATTGATCTCCTAAGGTCTGTTCTCGAGATGGGATACAATTTTGTTTTCACGGTAAAGTTCCAGCATCTTC	1	-	Chr1:4999623-4999742
Chr1:4999754-4999910	AJ_ArThaHiC2091110319769	GAATTGGGGAAGAAACTAGTCAAATCTTGGATCATTTGGTGATTGTTGCATTGGATGCTAAGGCTTATTCGCGTTGCTTAGAACTGCATAAGCATTGTTTCAGTCTTGTTACGGAAGGAG	1	-	Chr1:4999756-4999875
Chr1:5000397-5000640	AJ_ArThaHiC2091110319800	TAAAATTATTGGGCAAAATCCTAACGTTGATCGTAAGTGACGATGGTCGGTGGTGATGAATCTATCTCACCGTGTCGGTTCGAGATTCCACACGGCGAGCCTCGAGGCTTCGTCTTCAGC	1	-	Chr1:5000485-5000604
Chr1:5042196-5042371	AJ_ArThaHiC2091110319951	GGGTTGTCTCTTCCGAGTCGGGGACTTAAAATAAAAACGCTGTCTTTCCCTATCTTTGAGATCTCTCTCTCTTCTTGTGTTTTTTTTTTCTTATCTTCTTTCTCATAAAAAGTCTCTCTC	3	+	Chr1:5042245-5042364
Chr1:5137206-5137440	AJ_ArThaHiC2091110320528	TTCTCTCTCCCGCGCAAAATACACGGCGGCTTACCTCTCCAAACTCTCACGTCGCGCTGCCTCAGCTGCTGTCCACGACTGCGTTTCGAACGTGGGAGATGCCGTGGATCAGATGCGTGG	1	+	Chr1:5137267-5137386
Chr1:5271770-5272012	AJ_ArThaHiC2091110320840	AAAAGATCTTTGATAAAAAGAATTGAGCCCTAATTCCTTGATGTTTGTTGAATCGCACAGCAGATAAAAAAAAATGGTGTTGGCGGAGCTCGGCGGCCGGATAACCCGCGCCATACAGCA	1	-	Chr1:5271833-5271952
Chr1:5283785-5283967	AJ_ArThaHiC2091110320937	ATATATATATATATATATTCACCATGCTTAATTATTAATTTTGACATGCGTGATGATCTTTCAAAATAAAAAGGAAACGGAGGATTTGGCTAGGGACGTTCGAGACCGCAGAGGAGGCAG	3	+	Chr1:5283846-5283965
Chr1:5379071-5379229	AJ_ArThaHiC2091110321472	AACGAAGAGCACATCGTCAACATTACAACCAATGTCGATTCTTCATCAGATGATGAGCAAACACAGGATGATTGTGGTGATCATTTGAGACGTATAATAGCTCTTTTTGTGGATGAAGGG	1	+	Chr1:5379084-5379203
Chr1:5436077-5436281	AJ_ArThaHiC2091110321583	CTGTTGTTCTTAAGCCTTGCTTTTTAGAGTTTTCTCTTTTGATCGGGATTCCAAAGAAGATAAAGTATCTCCCTTTGTAGTTGGGTCTGGTTTATTACAATTACGAGAATAGATGAACTT	3	-	Chr1:5436138-5436257
Chr1:5436281-5436482	AJ_ArThaHiC2091110321593	TCTTCATTCGTTTTTCGATCAAGCTAAACCCTAAATCCAGCTCCAATTTCCCCTTTTTCTCCTCTGTTTTCCTAATATCAAGCCCTAATCGTTGTACCAACCTTGACTCCGTCAAACGCC	1	-	Chr1:5436315-5436434
Chr1:5518643-5518889	AJ_ArThaHiC2091110321661	GTCCATATTTCCTCACTGATGAGAACTGCCTCGTGATGGTTGGTTGTGGTACAAAGGCTTTGATGAAGGATATAGAATCAGAGATCTTGGGTTGTGAATCGAGCTGTGAAGATAGCAAGA	1	+	Chr1:5518740-5518859
Chr1:5525860-5526076	AJ_ArThaHiC2091110321755	ATTTCCTCACGGACAAGAACCTACTCGTGGCGGTTGGTTGCAAATTCAAGGCTGTTATGGCGGGTATTACATCGCAGATCACCAGTTGTGAGTCGAGTTGTAACGAGAGAAACAGTAGCA	1	+	Chr1:5525933-5526052
Chr1:5574200-5574405	AJ_ArThaHiC2091110321790	TTTGCATTTGTCTCATTTTTTTACTCAAACGAACATTTTCGTGGCTCCAGAGCTACACTCAAAAGCCATTCAGCGGAAGGGGTTAGGATTTTTGGCGGCGAGATCTCTCTGTTTCTGGTA	1	+	Chr1:5574237-5574356
Chr1:5575195-5575409	AJ_ArThaHiC2091110321845	TGTATTTTATATGTGCGAGACAGGTTTTGGTCGAATTGGAAGATTGGTCCTCCGCATCGCAACCTTTAGGGATGATATCGAGGTTGTAGCAGTCAACGATCCATTCATAGATGCCAAGTA	1	+	Chr1:5575244-5575363
Chr1:5578827-5579022	AJ_ArThaHiC2091110321904	AGTGAATGATTCTCTCTGTTTAAAACCCCTTGCTATTGATTTGATTCAGTATAAAACTTTTTCTTTTTGTTGATTCAAAGTTTTTGATGGGATCTTTAGCTTCTCTTTTGGAGTTTGTAT	5	+	Chr1:5578864-5578983
Chr1:5788517-5788677	AJ_ArThaHiC2091110322081	CTAAGCTCCTTTGCTTCCATACTTAGGTTCTCGATCTAGCAGTGGCTTTAAACGAGTTTCCATAGATCTATCGTTTTGGTGACTTTGATAGCGGACACTAGCTTTTTGATTCGTTTGTTT	1	-	Chr1:5788558-5788677
Chr1:5812679-5812924	AJ_ArThaHiC2091110322203	TGCAAAGAGAACCGGGGAACATTCTTGGTCTCTGGAAATGAGTCCTGGTGGCAAATTTAATCTTCTAGGTAAGTCATAAGACATATAGATATATATTAACATAGTGTGATAATGTTCAAT	3	+	Chr1:5812728-5812847
Chr1:5813249-5813484	AJ_ArThaHiC2091110322213	AGATGGAGATATTGTTTGGTGCCAAGATTATCATCTCATGTTTCTTCCTCAATATCTTAAAGAGTACAACAATAAAATCAAAGTTGGATGGTTTCTCCATTCACCATTTCCTTCTTCCGA	3	+	Chr1:5813274-5813393
Chr1:5834458-5834661	AJ_ArThaHiC2091110322356	ATAGAATGATACACATTTTCATAATTAAGATCTAAATCTGATACCCTTTGTTTCCCTGGTTTTGTCTAAATCTAGTTCAATATACATATGATTGTTGTATGTGCTTTGTTTTGTTTCATT	5	-	Chr1:5834506-5834625
Chr1:5872942-5873143	AJ_ArThaHiC2091110322540	CAAATATTTACTTGAAAATTCGGTTGGGGTGGTTAAGCATGCGTAATACGTTGCATTAGCTTCAATTTTTTAGATCTTCATTGCGATGATAAGTCTAGTAAACCGAATTAAACCAGTACC	3	+	Chr1:5873003-5873122
Chr1:5875559-5875715	AJ_ArThaHiC2091110322645	ACCGATTTGTGAATCTCTTATTCAGCTTGAGTACATTGATGAGGTTTGGTCCGATGCATCCCCAATCCTTCCCTCTGATCCTTACCAGAAGTCTCGAGCTAGATTTTGGGCTGAATTCAT	1	+	Chr1:5875572-5875691
Chr1:6057358-6057562	AJ_ArThaHiC2091110323061	CCTGAAATTTAACAGAGATCTCTGCATAAGTGTACCTTGCAAGTGTTGTCTTTCCCACACCTGAACTACCCCAAATACCAATGGTACGAACCTTTTCGTCAGATTCTAAAGCCAACAACG	1	-	Chr1:6057395-6057514
Chr1:6240468-6240698	AJ_ArThaHiC2091110323576	ACGAGCCTCCGTCTACGGCGCTTTCATCATCTATCCGCGGCAGCCTTATCCCTTTTCCGGCAGCCATATCCAATCCGAAATTCCCATTATACTTGGTAAAAAATATAACTTCTTTTCTTT	1	-	Chr1:6240471-6240590
Chr1:6246959-6247136	AJ_ArThaHiC2091110323633	TTGTCTTGATCCATCATTTTGGTCAATTTTAAGTATGAATCATGAATAAAATTCTTCAGGGTGAAACTGAATTCTTCACGGAGTATGGAGAAGCTAACAGGTATCAGATTCAAGAGGTTG	3	-	Chr1:6246960-6247079
Chr1:6247150-6247326	AJ_ArThaHiC2091110323636	TAACGCTTATTAACGTTCCTAAACGTAATCATTTACCTATGGATCCTCACAAGAAGGTACCTTTCTTCTTCTCCTTCTCTACCCTTTTATGCTATTTGCTCTTAGATGTTGTCTTTTGAT	3	-	Chr1:6247183-6247302
Chr1:6293984-6294223	AJ_ArThaHiC2091110323914	ACTCCTGTAATAATAAATGTAACGATTTTCTAATTAATCCAGAGCTTAGTCTTCGTTTCCAATGCATAATGATAGGATCAGAAACTGATTATCTCGAAAAATCAGGCTGGTGAGCTGGAT	3	+	Chr1:6294081-6294200
Chr1:6300002-6300249	AJ_ArThaHiC2091110324440	TGATATAGTTTTACAACGAACGTTAGAATAATTAAAGTTACCAATTTTAAAAAATTCGTGTTCAATAGAAAGATCGTTAAACGGTTAATTATTCCCGCGGCAATTTGGAATAACGTGTTG	5	+	Chr1:6300111-6300230
Chr1:6325793-6325947	AJ_ArThaHiC2091110324534	CAATGTCCATCTTTTTTTTCTTCATCAGCTTCGTCGTCTTCTCCGTCGCTGACCTCCCGTCGTGCTTCTCAGCCGATCAACAGTACGAGGAGTGTCGCTCACGTAATCTGACATGTGGAT	1	+	Chr1:6325806-6325925
Chr1:6331541-6331709	AJ_ArThaHiC2091110324612	CATCATCAACAACAATTACTTCACTTTCCCGGAAACTCTCCAGACAGTAGTAACAATTTCTCTTCAACTTCAAGTTTCCTCCATAGTGATCACAACATCGTCGATGAGACCAAGAAGAGA	1	+	Chr1:6331554-6331673
Chr1:6520696-6520849	AJ_ArThaHiC2091110325357	AGAAAGCAGAGCAGAGCATAGAGAAAAACATAACAATGGAGGTTGAGAAGACAGAGAAGAACATTGCAGAGGATGATGAGTCTAAGATCATCTACAGAGGATGGAAAGTCATGCCCTTCA	1	+	Chr1:6520697-6520816
Chr1:6525282-6525489	AJ_ArThaHiC2091110325480	CTTTAGCTTGCAAATCGATTTCAAAGCGAAAGCTTCGAACAGCTGTCGATATCGAAGACGTTCGTCGTGAGGTAGCGATTATGTCTACTTTACCTGAGCATCCAAACGTAGTTAAGCTTA	1	-	Chr1:6525286-6525405
Chr1:6616723-6616889	AJ_ArThaHiC2091110326015	TTTCAATTTCATCTTCAGAGACTTGACCCGAAGCGTCGTCTTACTTCTCTCCTTGCTTCTCACAAAACACTCTTCACATTTCTCTGGATCACTGCCTTTGGTTCCGTCTTTCTATGGCAG	1	+	Chr1:6616736-6616855
Chr1:6622654-6622855	AJ_ArThaHiC2091110326226	TTAAACCGACGAATCTGTTTCCTAGGCAACCAAGCTTTTCTTCCTCATCTTCCTCTCTTCCAAAGGAAGATGTTTTGAAAATGACACAGACTACCAGATCTGTGAAACCAGAGTCTCAAA	1	+	Chr1:6622691-6622810
Chr1:6624595-6624760	AJ_ArThaHiC2091110326278	GGAGAAGAGTGGATGGATAGGGAAAGTGAAAGTGATGGAGACTAAGGAAGAAGGTCACGTTTTTCATTTGAGGGATCCTGATTCTGAGAATGCTCGTCGAGTTTTGCGCAATTTTGCAGA	1	+	Chr1:6624620-6624739
Chr1:6806227-6806399	AJ_ArThaHiC2091110326632	ATTTTAGTTCCTTCGTGGATGTTCTTTTCCAGTCTACTCAATCCAGTCAAAGGGGTAACAACATTTATTTGGTAGGATTAGATCGAGAGACATTTCATTTTTTGGTAGAGATCATTTCAG	3	+	Chr1:6806252-6806371
Chr1:6835730-6835904	AJ_ArThaHiC2091110326658	GTGTGTTTGGAAGAGGTGAGCTTGTGATCGACCCTGCAAAGATCGCTGAACGGTATTTGACTCGTTATTTCATTGTCGATTTCCTCGCGGTTCTTCCTTTACCTCAGGTAGTTAATAAAA	1	-	Chr1:6835761-6835880
Chr1:6839536-6839714	AJ_ArThaHiC2091110326762	AGACGAGATCTACAACAACAACAAGGGTTTTGAGATTTTCCCTCCTCAATATTTTCAACAACAACAGCAACAAAATCATGCGGCTGCTCCAACAAATCTCTACTCTTTTGGTATGGTCCC	1	-	Chr1:6839537-6839656
Chr1:6920846-6921009	AJ_ArThaHiC2091110326864	AAACCAATCTCACTCTAGAACAAACAATAAACTCTATTTGGATCAACAAATTGTACTATAATGCTATGTTAAGTATTACGAATTTGTAATTCAAAATTAATTAGCAAAAAGTGAACTTGG	5	-	Chr1:6920866-6920985
Chr1:6975488-6975736	AJ_ArThaHiC2091110327107	TCCAGGGCCAAACCCCGCACCAGCGACAACTAAGAGGACACATAACACTACGTTTCCGGCGATCTTCGCCTTTGGGGATTCGATCTTAGACACAGGAAATAACGATTATATTTTGACCTT	1	+	Chr1:6975609-6975728
Chr1:6981937-6982164	AJ_ArThaHiC2091110327307	GTAAAATATAAACAGAGAGTAAAGTCAATGTTGGAGCAATTGACATATTTCCAACGACACATAGCGAGAGTAAAGAGGTTAGTAGGGGAAGAGAAGACGGATCAACTGTTAGCCAAGGGC	1	+	Chr1:6981998-6982117
Chr1:6984516-6984733	AJ_ArThaHiC2091110327414	TTCTTACTCATTTACTATATGTGCAAACTATATAGGGGGTTATATGGGTACAAGATCAGGTGAGTGACTTTCAAAGATACTTAGAAAAGTTAAACCAACAAGTTGGAGATGCAGCTAAAG	3	+	Chr1:6984613-6984732
Chr1:6984850-6985042	AJ_ArThaHiC2091110327422	TAATATTGTTCTACCTATAATGATTATTTTGTATGAATAACAGAGTCTATATGATCTAGGAGCTAGAAAATTTGCAATTCTTGGAACGTTACCGTTAGGGTGTTTGCCAGGGGCGAGACA	3	+	Chr1:6984923-6985042
Chr1:6999215-6999373	AJ_ArThaHiC2091110327484	TTGCGGAGAATGCTATAGGATAACGTGTGATCACGCGGCGGACTCACGGTGGTGCTTGAAAGGAGCTTCTGTGGTTATTACAGCCACTAACTTTTGCCCACCAAACTTTGCTTTGCCTAA	1	-	Chr1:6999218-6999337
Chr1:6999550-6999751	AJ_ArThaHiC2091110327490	CTCACCTCCTTCACTCGATCATCATCATCATCATCTCTTTCTTCTTCCAAAAGTCATAATCATGTCAAAGTCTCTAGCTGGATTGGCGGTTTTGGCCGCTCTTTTTATTGCGGTTGATGC	1	-	Chr1:6999584-6999703
Chr1:6999751-6999945	AJ_ArThaHiC2091110327497	TGCAGCATTATTACAAACAGAGTTTGCAGATCTACTGTCTTTTTTTGGACTTATACTGTTACTAACAAAAATACACATGTAAGAGATTTGCCCAAATAAATAAATTAAAGATACACACAG	5	-	Chr1:6999790-6999909
Chr1:7003249-7003476	AJ_ArThaHiC2091110327503	ACCTGCAGAGCTCGAGATCTACTGCTACTTCATTGTTCTTCTTTTTCTGATTGATCAGAAGAAGTACAACGAGGTAACTACTGCTGTATCTTTGTGTTTTGTCATAAGTTACTTTTCTGT	3	-	Chr1:7003345-7003464
Chr1:7003828-7004062	AJ_ArThaHiC2091110327537	TCGAACTGTTTTCATAATTGCTAAGTTTCTTCTGGGTTTTGACGCTTTGTTTCTTTGTTTCCCAGATTTGAAGGAGATTGCAGCACTCATCGATACTGGGTCTTACACGAAGGAGGTTCG	1	-	Chr1:7003859-7003978
Chr1:7029166-7029393	AJ_ArThaHiC2091110327623	TAGACCTTATGATTCAGATCTTATGTATAAGTTATGGAGTAAAAGTCGGAAAAGTCTCTTCATATCGTAATCATTATCGAACGAAATTCAACTGATTATGTAAACTATTGCCTGCCAACA	4	-	Chr1:7029226-7029345
Chr1:7032997-7033183	AJ_ArThaHiC2091110327819	AATTTCGTGGCTGCCACGATGCTACGTTACTACGTACTAAGTCTGAGTTTTGTGAATAGACTGAAAAAGACAGAAATAATTCAACGTGTGAATAGATCAAAACGTTTTTTTCTTCTGTCT	3	+	Chr1:7033022-7033141
Chr1:7034537-7034770	AJ_ArThaHiC2091110327877	TTCGATTATCTCGTCCATGGGTTACAATTAAGCCATAAAGCCGTTGCGGTTACAAAGAGCCTTACTACACAACTCGCTTGCCTTAACGAGAGAAAGCTTCATCTAGTCCTTGACTTGGAC	1	-	Chr1:7034555-7034674
Chr1:7034770-7035008	AJ_ArThaHiC2091110327885	AACGGATCCCACATCGGTTAAGAATCAAAAGGCTAAGCAAAGGAGTCCCACATCGCTTGCGAATAAGAATGGTACGCAAAATTTTCTTTTATAAATAAAGGTGTCCCTACGATAAAACGA	2	-	Chr1:7034829-7034948
Chr1:7043824-7043997	AJ_ArThaHiC2091110328022	TGGTCTTTACTCAACCTTCGATTGTGCGTTGGTGTACGCAAGACAAAAGGAAGATCCATGGAACTCGATCTTATCTGGTGCAGCCACTGGAGGATTCCTCTCGTTGCGTCAAGGCTTAGG	1	+	Chr1:7043878-7043997
Chr1:7209177-7209348	AJ_ArThaHiC2091110328211	GAAAAAGTTAATTAGGCCTATAAAGGCCCATTTACCAGCAAAGCGAAAGAGAAAAAAAAAACAATCGTTAAGACGATTCGATCTTTTGCTGTGTCAGTCATTTATACGATTTTTTTTTTG	4	+	Chr1:7209202-7209321
Chr1:7258377-7258571	AJ_ArThaHiC2091110328304	GGGAATGGGTCTATTCACCGACGCATACGATCTTTTCTGCATAGCACCGGTCATGAAAATGATTAGTCATGTTTATTACAACGGTGACTCAATCAACACAGCCGTTCTTTCAACTTCTTA	1	-	Chr1:7258416-7258535
Chr1:7258611-7258793	AJ_ArThaHiC2091110328314	TAAAGATCCTTGTTCTGTTTCACTCATCATGAATTCGAAATTTCGATATAACAAACCAAAAGGAAAGAAGCAAAAAAAAAAAAAAAAAGCTCTGGATTCGGAATCTCAGATAAAAAAACC	5	-	Chr1:7258614-7258733
Chr1:7258793-7259012	AJ_ArThaHiC2091110328323	AGTACTGAACCGACGGTTTAATTTGGCTAGAAAAATTCAAACAATTATGATGTTGTGCCTTAATGTGACAACATAGATAAAAAGAAGCTCTTACAAACAAACTGACTAAGTCTTCCTCGG	3	-	Chr1:7258809-7258928
Chr1:7260375-7260611	AJ_ArThaHiC2091110328331	ATTGGATCTTCCTCTCTAACTGTTTCCCAGCTACAGAACTTGTACTATAATGTACTCAGAAACGCCAAGTCCAGCCTCCTTCTTCATCCAGACATGATTTATATGTATCTCAAGGGATAT	1	-	Chr1:7260432-7260551
Chr1:7260741-7260937	AJ_ArThaHiC2091110328340	CATTGTTAGAAAAGGGTTAAACTTAAGAGATCTAGGGACTAAAATGATGGAGATTTTCAATGCTATGACTAAATTGGCAAATTTGAGACACTTAATTATGTCCTGTAACTATGTTTTTGG	4	-	Chr1:7260782-7260901
Chr1:7346870-7347072	AJ_ArThaHiC2091110328639	TTTTTGTTTTGTTATAAACTGATGAAATAGTTTTCATGAAGAAAACATTGTATATTTTTTCTTTGATTGTGTATTTGGGTCACGTACCATAGACTAGTGATCGTATATGTTTACCAACAA	5	+	Chr1:7346907-7347026
Chr1:7366592-7366814	AJ_ArThaHiC2091110328684	AAAAGTCTCCACTCTCCATTACCACACACCACCTATACATATATGCCATCACACTTCCTATTCTTCACCAAAAACAAGCTCAATATTCTCTTCTTTCATTTCACTCGATCAAGTTTGAGC	3	+	Chr1:7366641-7366760
Chr1:7367316-7367467	AJ_ArThaHiC2091110328707	ACGACGCCGTTTTCTTGAGGATGATGCAGTCTGTGTCAGTCGGAGCCGGAGTGGTGCCGTCGGAAGAGGAGGATCAGATGTTGTATTTGAGGGCTAGGTTTGAGCGAGTTACTGGTTCGA	1	+	Chr1:7367329-7367448
Chr1:7445258-7445459	AJ_ArThaHiC2091110329473	GTAGGTTGTAACAGTTACGCATTTCTCCGCACATCTGGAGTTGAAAAATACTCAACTGGATGCATATCAATATGTGATTCTGCCACAACGAAAAACGGATCATGTTCTGGTGAAGGTTGC	1	+	Chr1:7445295-7445414
Chr1:7469114-7469276	AJ_ArThaHiC2091110329708	GACATTTGTTGGAGGCGAAGGGACTATGGATCAATATTATCATTATCATCATCATCATCATCATCAAGAACAACAACATCAAAATCAAGGGTTCGAGCGGCCAAGTTTCCACCATGCTGG	1	-	Chr1:7469121-7469240
Chr1:7493510-7493686	AJ_ArThaHiC2091110329932	TTATCTTCAACGGCGTATTTGAGTCCCTTCGGTAGCCTCCGTCATGAGTCTACGGCCGTGGAGACACAGGCTGATCATTTGGTTCAGCAGATTGATGAAGTCGATGCCCAGGTATATTTA	1	+	Chr1:7493547-7493666
Chr1:7494123-7494360	AJ_ArThaHiC2091110329957	TATATGGGTCCCACTTGTGTAGTTGATTTGAGTACGTGTACGTCTCATTCATTAGTCAATAGTCACTGCAGTCTGAATCTTCCAAAAAACAGACACTAAATTTCACTATGATCCCTGTAA	3	+	Chr1:7494184-7494303
Chr1:7516950-7517173	AJ_ArThaHiC2091110330008	AGCCCTATACATATATAGAGATATAGATATGGTGGTCTTATGATCTATTGTCTACCCTTATCAACTGCAGCCTTTCCAAGTGAATCGCAGCTAGGAAGGCCGCAGCTTTACGGTGAATCT	1	-	Chr1:7517030-7517149
Chr1:7520632-7520789	AJ_ArThaHiC2091110330070	TTAAATGTGTGAGAATGTTGGGAGGTCTTAATGACAAGGAGATCAATCAGACCTATGTCAAGGTTAACGAAATCATCACTCACTCATTCAAATTGTTGATGCTGATGTTTTATTTTGTTG	3	-	Chr1:7520646-7520765
Chr1:7521290-7521498	AJ_ArThaHiC2091110330094	TGCCTTAAAACATTTGAAGAAGCAAAACGAAGAAACAGTGAGAGAGATAGAAATGGCGAGCTTAACTAGTAATAAGCCTAGAAATTTTGGTGCGTATAGTCACTACGCTACTCCCTGCAC	1	-	Chr1:7521291-7521410
Chr1:7521498-7521654	AJ_ArThaHiC2091110330096	ATTTAAGACATTAAATTAAATTAGAAGATTGTTATAGGTTTGCGGAAAACAAGATCAGATGGGACTGACCATAGGAACGTCGGGCCGTATACGAACTCTTCTTCTGAGCCCATAATGGGC	1	-	Chr1:7521523-7521642
Chr1:7553328-7553557	AJ_ArThaHiC2091110330296	AAAGGATCTAAGAAGAATATTGATGTTGTTGCTGATAATGATGAAGCGATTGCGAGGGCGTTTAATGTGTTCGATGTGAACGGAGATGGTTATATTTCAGCGGAGGAGCTTCGTGATGTG	1	-	Chr1:7553378-7553497
Chr1:7568811-7569047	AJ_ArThaHiC2091110330395	CATCGATCATTCATCACTCTAAAGGTTTGGCCTTTCTCTATAAGTTTCTTTTGTATGTGATGATTTCTGTGTCTGTATTAGGGTTTTGAACTCTTCTTCTTTCTTGGGCATTGGTTTGTA	3	-	Chr1:7568868-7568987
Chr1:7749459-7749669	AJ_ArThaHiC2091110330678	CGAAAAAGTATCCATCAAGCATGAAATCAACTACAATCCTAAACCTGAAGACGCAGGACGAATCAAAGTCTATGTGAGTATCCTAATGTCGGAAGATCCTATAAGAGATCGTCGACCAAT	1	+	Chr1:7749508-7749627
Chr1:7814102-7814318	AJ_ArThaHiC2091110331210	AGTTTTGTAGATTACTGATCAGCATTATTATATCAACTTACGATTTGGATGAATCAAAATCTCTTCCTGCTTCGCCAATATGGGTCGGGTGAAATTAGAAATCAAGAGAATAGAGAACAC	3	-	Chr1:7814151-7814270
Chr1:7817563-7817723	AJ_ArThaHiC2091110331338	TATTTAGACCTAAGCAAAAATTTCTCCATAGAAGAACTTTGAAGGAAAAAAAGAGAGGCTAAATCAAAGATCGAATTCGTCACTGTATTTATTTTCCAGGTAGATATGTAATGCTTTTTT	5	+	Chr1:7817588-7817707
Chr1:7846722-7846883	AJ_ArThaHiC2091110331409	AGTCTGAGTCACTCACCCTCCGACTCGACCACTCAGTATCCGATTCACCCGTCGTCACAAGCATTTTCCGATCTTTATTCAACGGTCTAGTTTCTCTTTTATCCAAACCGGCTAAACCAA	1	+	Chr1:7846747-7846866
Chr1:7886803-7886992	AJ_ArThaHiC2091110331519	CGGTTTTGTAAGTTCTTTTATCTTCCCCACCATTTTAAGGATTCTCAAGGTTTGACACGTCATCATCTCCGTGGTCCAGGTCACGTTTCGAGACTCGGATTCAGCGACGAGAGCCGTCGC	1	+	Chr1:7886804-7886923
Chr1:7902162-7902324	AJ_ArThaHiC2091110331754	ATCACATTTTGTCTTTTGGCAAAAGAGAGATAGAAAATGGGATCCCGTTTTGTTTCTAACGAACAAAAACCACACGTAGTTTGCGTGCCTTACCCAGCTCAAGGCCACATTAACCCTATG	1	-	Chr1:7902181-7902300
Chr1:7933443-7933667	AJ_ArThaHiC2091110332325	CAAATACAATGTGTATGTTTGTATGATTGATCTGAGAACAGAATTATCATAAATAAATTATGTATTTTGGTCACTACTAATATGGAAGAATGACCTAACATTTTCATTTTCTTACAATTT	6	-	Chr1:7933512-7933631
Chr1:7977922-7978110	AJ_ArThaHiC2091110332354	CTAGTTAAACCGGTTTGATCTTTGTATGATTTAAACCGGGATTTTAGCTGAATTTGGAGGATTATTATTATTACAGGGGCTAGGACTATTGACGTTATCAGCTTCTTTAATCATAATGGG	3	-	Chr1:7977943-7978062
Chr1:7978466-7978653	AJ_ArThaHiC2091110332381	CGTGTTCACTAGTTGCGCAAGACAAAGAGATCTTTTAGCTTAAAAATCTCATTTAGGCATTTACCCTTTAAAAAGTTTTCACAGAGATTCTCAACCTCTATTGGTGAGAGAAATGAAGAT	3	-	Chr1:7978498-7978617
Chr1:7982085-7982321	AJ_ArThaHiC2091110332481	TATGTCCACGGAATTTCAATTGTTTGGTCTACCCATTCATTGTTTATTCTCTCTTGCTGAATTAGTGGTTTCTTTTTTTTTTTTGAATAAGTTTTCACTAGAAAACTTTGAGGAAAGTAG	4	+	Chr1:7982086-7982205
Chr1:7988665-7988820	AJ_ArThaHiC2091110332654	TAAGCACAAGCTGGGGACTGTGTTAGGGAGAGTCAAAGATCGAACGGCTAGTGATCTTTCCGACGAAACGCCTGAAATGACGGTCGCACGTGAGGCACTTGAAGTGGAAGAGAAGGTCTC	1	-	Chr1:7988689-7988808
Chr1:7988835-7989006	AJ_ArThaHiC2091110332659	AAACACTAGAGTCTTGATTTCACCTCCGGGGAAAGAAGTAGATCAGAAGAGCAGAGACGAAGGAGAAGTGTTTGGAAATGAGAAGAGAGAAACGGCGTCGTCTCTTCCCGAAGAAGAGGA	1	-	Chr1:7988863-7988982
Chr1:8135698-8135916	AJ_ArThaHiC2091110332776	GCCAAAGCCTTCTCCTGATCGAATCATAAACCAAACAAATCTTTCTTTTAAAAGAAGCGGACACAAACCCTAACCACCAACCCTCTCCGTCGTCAAATTTCCCGGCGAAAGATGAAACGA	1	-	Chr1:8135749-8135868
Chr1:8136022-8136179	AJ_ArThaHiC2091110332784	TGTAAATCAATCTTTGTGTAGAAAAAAAAGTGAAAAAAATGATCTTGTTATGAAATTCAAAATCCATACAGTATTTGTTTTTCCTTCATGATTTTACTTTTTTACCAATTAACTTAATAA	6	-	Chr1:8136036-8136155
Chr1:8205866-8206110	AJ_ArThaHiC2091110333027	TGAATGCTGAAGCTCGTAAAGAAATTGGATATCCAAAACAAAGATTTGGTGAAGACCGAACGAATCCGTACGAGGAAATAACACCACCACTAATAGGAGGATGTGATCCTAAAAATCCTC	1	+	Chr1:8205939-8206058
Chr1:8207125-8207363	AJ_ArThaHiC2091110333150	TCTTGGTGTAGCTTTGAGTCCATGGGAAGCAATTGGGTCGGTGGGAGTGAGGAACTTTATGTTGTGTAAGAAGAAACCAGAGGAGAAGAAGGTTGAGGAAGATAAGGGAAGATCGAATTT	1	+	Chr1:8207186-8207305
Chr1:8207363-8207531	AJ_ArThaHiC2091110333157	AAAGTGACTACCCATTAGAGAGACTACTTATATGTTGTCTTCTCTGTTTCTTTGAATGCTCATGTTTGGTTTGTGTCTTTGTTCTTTTGATCTTCTTATTTTATGAACTTTTGATTTGTT	4	+	Chr1:8207376-8207495
Chr1:8207531-8207692	AJ_ArThaHiC2091110333162	TTGAACAAAAAAAAAGAAGTTTCTTTCGCTATAGATTTTTAGTATTTGTCCTTTTTGTTTACAAAATTAGTTTAGAACTTTGATCACCAGAAATGTGAAAATAGCATTGCTTAAATTAGT	6	+	Chr1:8207544-8207663
Chr1:8301583-8301763	AJ_ArThaHiC2091110333441	TCAGGAAACGTACTGCGATATATTAGTGAAATACAAATCGGATCTAGCAAGACCGTTTGACGAGGCAACGTGTTTCTTGAACAAGATTGAGATGCAGCTACGGAACCTATGTACTGGTGT	1	-	Chr1:8301620-8301739
Chr1:8301763-8301924	AJ_ArThaHiC2091110333446	GGAGAGTGATGTTTATAAGCAAGAGGTTGTTCCTTCTTCTTGCTTTGGAGCTGATCCTGAGCTTGATGAATTTATGGTCTCTCTCTTTTTTTCCCTCGATTTTTTTTCGGATTTTTATTT	3	-	Chr1:8301793-8301912
Chr1:8301924-8302165	AJ_ArThaHiC2091110333452	ATCCTCGCTTACTTCAAGCTTACATCGATTGCCAAAAGGTGATCGTTAACTCTTTCTTTTTTTATCACTTAGATAAAATCTAGGTTTTACTTTTTAAAGATAAAGATAAGATTGAGAAGC	4	-	Chr1:8302022-8302141
Chr1:8302340-8302500	AJ_ArThaHiC2091110333464	TCAAGAAAGCGATTTAGAAGACGGAGGAGTTCTTACCGGAGATCTTATACTTATGGATGGAATGTACAATTTCCATTCGGCCGGTGATTATTCAGATAAGTCGGTTCTGATGATGTCACC	1	-	Chr1:8302357-8302476
Chr1:8302500-8302669	AJ_ArThaHiC2091110333469	TAACTTTCATATCTTTTTTCTTCCAAAAGAAAATAAATTAAGATCCCTCGAGCCTCTCTCTCTCTCTACACACTCCCATAGAAATAAATATTTTCAAGAACCAAAAAGTTTGTTATAAGC	4	-	Chr1:8302526-8302645
Chr1:8315539-8315697	AJ_ArThaHiC2091110333737	ACTTCAAGACATTGGTGTAAGAATATGATCAGAATCAACATAATGGCTAAATTTTGCCTTGCACTAATCCAGGTTAAAACTAAAACAATGTCGCAAAGAATTGTTCCAACACAACGTCCT	3	+	Chr1:8315578-8315697
Chr1:8395529-8395683	AJ_ArThaHiC2091110334381	CTCTAAATCATCTTTTTCGAATTCGCCTCCCAAGGTCCGTCTAGAAAACTAAATCATCTTTTCGTTTTTGTATAGATCATATCATTATGATGATCTCGATCTCTTTTTCTGTCCACTCGT	3	+	Chr1:8395542-8395661
Chr1:8396103-8396275	AJ_ArThaHiC2091110334408	TGTCTTCCTTAATTTTTTTTTTTTTTTTTAAGTATGGATGAAATGGTCAAATTTGCAGTAAGAAATCGGATCTCGGGAACGTGGCAGCCGCAAAGATCAAGAAGTTAACGGATGAGTTAG	3	+	Chr1:8396140-8396259
Chr1:8396301-8396462	AJ_ArThaHiC2091110334411	AATCCGGATTTCTCCATTTCAAGACTAATAATTATGAGTACGTAAAGTTATATTCCATATTCGCATTTTTGATGTTTTTATATCGGTATAAATGATCCACCTTTTTGACCTACTCATATC	5	+	Chr1:8396302-8396421
Chr1:8400834-8401001	AJ_ArThaHiC2091110334508	TGATTCTAGTAATGTTACAGGGTAGCTAGTAATATCTTGATTTGGTTTTGTGTGTAGTGGACTTAATGAAAGAGGGATCAACTGTAACTCTACGCAATGCGAAAATCGACATGTATAAAG	3	+	Chr1:8400859-8400978
Chr1:8401046-8401272	AJ_ArThaHiC2091110334515	GTTGAATGAGTGACAAATTCCTCGAAATACCACTAGGAGAAACGCCCTCAAGAATAAACAAGTCAAATCCGTAACCGTTTATGTTAGCGTCAAGAAAAGAGTTAAACCCTGATCAGCTGA	1	+	Chr1:8401095-8401214
Chr1:8405239-8405410	AJ_ArThaHiC2091110334522	CGATGTTGATTGGAAGCGTAAATTTGCTTCTTTTTGGAGACGGAAACGACTCGATCTCCTAGCAAGACGAAACCCTCCCATAAAAAAGAGCAACCCTCGATTTCCTACGCTATTTCCAGA	1	-	Chr1:8405279-8405398
Chr1:8406016-8406213	AJ_ArThaHiC2091110334575	AGGGGAAATTCGGGTATAGAGGGTCCAGTGCCAATGGATGTGGAGCTCGCTGCCGCTAAAAGCAAAAGGTTAAGTGAACCATTCTTTTTGAAAAATGTATTGCTTGAGAAATCTGGCGAT	1	-	Chr1:8406022-8406141
Chr1:8409766-8409985	AJ_ArThaHiC2091110334599	TTTTCAATTATCCCAATCCTCTTTCTTCTTCAACTACACTTACTTACCGTTGGATCTCTCCGACTTAAGTAACAAATAAAACCCTAAATTCTTCTTCCCGATCTAAACCCATTTCTTGAA	3	+	Chr1:8409866-8409985
Chr1:8410391-8410563	AJ_ArThaHiC2091110334601	AGATTGAGAGTTCGAGACCTAGAAGAGGTTCTTGGGGTCAAAACGGTGACGTTTCGTCTCCGTTTGTGTTAAAGCCTGCACCTTTGGATTTTGATCAGTGTACGCCGGCGAAACATAGGC	1	+	Chr1:8410404-8410523
Chr1:8413880-8414078	AJ_ArThaHiC2091110334664	TCTTAGCTTTGTTAATTTCTTCAGGAGAGATCAAAGATACTGTTTCGTTTCGCTGATTTAATCGAGAAACATAATGATGAGATTGCTGCTCTTGAGACTTGGGATAATGGGAAACCTTAT	3	-	Chr1:8413923-8414042
Chr1:8414078-8414289	AJ_ArThaHiC2091110334670	AATATTGAGACTAGATTGTTTAAAAACTACAGGAAAAACTTTCCCTACTTTGGATCCAAGAAATGGAGAAGTGATTGCTCAAGTGTCTGAAGGTGATGCAGAAGACGTGAACCGCGCGGT	1	-	Chr1:8414158-8414277
Chr1:8481368-8481579	AJ_ArThaHiC2091110334811	ACCCCAAGAACCTTATATAATCCCAAACCCCAAACAAAGCCGAGAGTATTTATTTCAAGAAACGGATGAAACAAATTGGAAGGAGAAAGCCGGTTTTGCTCCATCAACGGATTGGGGAAG	1	-	Chr1:8481376-8481495
Chr1:8483213-8483411	AJ_ArThaHiC2091110334854	TTTAAACTCTTTGTATCATCTAGTTGGTATGTTATAAACGTATGCTCTGTTATATATACCACATTGATTGTTTCGATTTTCTTCTTTCATCTGTCAGGGAACAAGCTTCGAGCTCGCTGC	3	-	Chr1:8483214-8483333
Chr1:8483411-8483569	AJ_ArThaHiC2091110334856	AATTGATCGCTTTTAGTGTTTATATGGACTGATAGATCATCTTTTGCTGGTGGATCTTTAGGGTTTCGATATAGAGAACATTAAACTACCACCAGGTATGCATGGACGGGTCATGGGACT	1	-	Chr1:8483438-8483557
Chr1:8499052-8499268	AJ_ArThaHiC2091110335055	TGCTGTGTTTCACCATAGTCACGGTGGAGATCGAGGAGGTACCTTTGGAGAAGAAAAAGACTACGTTTAGAATCGAGGGCTTTCAGATATCGGAGTGGTACAAATCGTTCAAAGGAACAA	1	-	Chr1:8499113-8499232
Chr1:8571677-8571855	AJ_ArThaHiC2091110335445	GGCGATGATCGTGTATACAAATCAGTTTTAGACATTTTAAACATGTACAGAAAGGATAGGAAGCCCATCACCGCGGTCTACCGGGAGGTAGGCTCATTGATTCATACTAAGTTTTTTTTT	1	-	Chr1:8571678-8571797
Chr1:8571855-8572037	AJ_ArThaHiC2091110335448	TACTTTTGGGTTTCAATGCCTTCTTACCAAATGGTTATATGATCACACATCATGAACAACCTTCACAGAAGAAACCTGTCGAGTTAGGGGAAGCAATTAGTTTTATTAACAAGATTAAGG	3	-	Chr1:8571894-8572013
Chr1:8572037-8572260	AJ_ArThaHiC2091110335457	ATGACGAGTTTCTTCAGATCATGATAGATTATAAAACTCAGAGGTTAAAGTTCTTTCTACTTTTATGTTTGCATTTGGTCTTGGTTTAGGTAAAACTCCATGGTTTCTGAGAACTGATTA	4	-	Chr1:8572093-8572212
Chr1:8572260-8572484	AJ_ArThaHiC2091110335470	AACCTTGCACCATCTTTTGATTCTAATAATGTTTCACCTTTTTTTTTGGCTGCCTCTCTTTGAACAATAAAGCTTTCCTAAACTTCAAACCATGGTTGGAGAAGGAGGCGCACACAAGCC	1	-	Chr1:8572281-8572400
Chr1:8595020-8595214	AJ_ArThaHiC2091110335477	GGGGGTCGTCCAATTCGATCAAATCACTCAATTTTGTTGTCAGATTGATATAAGTTCATAGGGGGATATTGTTTCCACGACAATCCATTTTAGTAACCCTTAGGGGTTTCCAATTTTGGG	1	-	Chr1:8595047-8595166
Chr1:8700363-8700602	AJ_ArThaHiC2091110335951	TATGAAAGAAAGCTGAATAATGCAGTTAGAATAGTTCACGCGTTTGCGAATAAGACAGTGAGAGAGAGGAGGAACAAGATGAGGAAACTCGGGAACTTGAACGATTACGCTGATCTCTTG	1	+	Chr1:8700424-8700543
Chr1:8700602-8700845	AJ_ArThaHiC2091110335962	ATCAGTGGCCCTCGTGTGGTTCTTCTGGCTAGTTCAGAAACATCCTGAAGTCGAGAAGAGAATCCTAAGAGAAATCAGAGAGATTAAAAGGAAACTTACAACACAAGAAACTGAAGATCA	1	+	Chr1:8700663-8700782
Chr1:8860698-8860929	AJ_ArThaHiC2091110336079	ACCGCCTGCGTCCAACGTGACCGTGAGTACTCTCTTCTTTCTTAGTTTTCCCCAAAGGTTTCTGTCTCCATTTGTATAATAACTCCTTGTCGATCTTCTCTTTTCTTCAGCGAGAAAGAC	1	+	Chr1:8860771-8860890
Chr1:8860968-8861173	AJ_ArThaHiC2091110336084	GTGATACATTTGTCTGATTTGTACCAACCCCTGATTAACCGGTCTGATTTGTACCGGAACTAATGTTGATGTTTTTTGTAAATTACAGATGCTGCCAGGGCAAGTGGGAGTGGTGTTTAA	1	+	Chr1:8860969-8861088
Chr1:8861173-8861349	AJ_ArThaHiC2091110336096	TAACAGCTACAATGGTGGAATTAAGTACACTAGTGCTGGTTTGTAATCAACTTTAAAATGTGTTGAGAACCGGATCAGCTGGTCTAACTGAAATCTAATTAATCAGTTTGCAACTATAAC	3	+	Chr1:8861210-8861329
Chr1:8861460-8861628	AJ_ArThaHiC2091110336100	ACTCAAGTCAATAAAGAAGACCAAACGCATATATAGTCTCACTTTAACTTCAATCTCTGAAACTTTTTTTTGTTCACGTTAGACATATGATCTCTGAAAACCTAAGTTATTTAAACTGTG	4	+	Chr1:8861473-8861592
Chr1:8939535-8939777	AJ_ArThaHiC2091110336453	GGAAGATCTCTTCAAGAATACAGGTCTTAAACCTAAAGACATCGACATCCTCATTGTTAATTGCTCTCTGTTCTCACCAACGCCGTCTCTCTCCGCTATGATTATCAACAAGTACAAGCT	1	-	Chr1:8939598-8939717
Chr1:8943089-8943295	AJ_ArThaHiC2091110336637	ATAAACTGGCTTATGTTTATTGAAGCTTTTTTTTGTTTTCCTTAGGATAAATTTGATCCTAATATAAGTGGAACAATGAATGTGATGAACTCTTGTGCAAAGTCAAGAAACACTGTGAAA	5	+	Chr1:8943174-8943293
Chr1:8943295-8943448	AJ_ArThaHiC2091110336640	ATCTTCTTCAACCGCGATACGGTACCGTTTTGATGCTACACAAGTCTCTCCACTTAATGAATCGCATTGGACCGATCTTGAATACTGCAAACACTTCAAAGTCAGAACTTTTTAACTCAT	1	+	Chr1:8943308-8943427
Chr1:8943448-8943617	AJ_ArThaHiC2091110336645	ATCGATGAATGTCTGAAAAAATGTATGTAGATTTGGTATGCTTATAAAAAGACTTTAGGGGAGAAAGAAGCTTGGAGGATCGCAGCTGATAAGAAGCTAAACCTAGTTGTCGTAATCCCA	3	+	Chr1:8943473-8943592
Chr1:8943617-8943814	AJ_ArThaHiC2091110336655	ACTTTCATACTTATGTTTTCTATTTCACCAAATACACTTTTTCTGTCCATTTGAGCTGATCTTGTCTTGACTAGGGACTCGTGGAACGTACCCTAACTTCAGGGGAGGGTTTGTGCACAT	1	+	Chr1:8943690-8943809
Chr1:9042921-9043125	AJ_ArThaHiC2091110336856	TGGTGATCTGGGTTTTATCTGTTTAGTGTTGAAGCCTGTTGTCCGAGTATTTAGGGTTCAAATTATAGTACAGTGTTGAGTGATGTGTGGTTTTTAGTTGGTGCTTGGAGGTTACTGTCA	1	-	Chr1:9042946-9043065
Chr1:9046175-9046424	AJ_ArThaHiC2091110336953	AAATGGACCTGAATCAATTGCTGATCATATGTACCGTATGGCTCTAATGGCACTTATAGCTGGTGATCTTACTGGAGTTGACAGAGAAAGGTTCGGTTTTGCCTCAAAATGTTTTTCCTT	1	-	Chr1:9046305-9046424
Chr1:9157437-9157594	AJ_ArThaHiC2091110337121	ATCTGTTGTCGGTTGGTTACAAGAACGTGATCGGAGCAAGAAGAGCTTCGTGGAGGATAATGTCGTCCATCGAGCAGAAAGAAGAGTCTAAAGGCAATGAATCAAACGTGAAACAAATCA	1	-	Chr1:9157439-9157558
Chr1:9157594-9157828	AJ_ArThaHiC2091110337125	TTTCAGACAGATTATTATCGGAACAAAATGTCATCATCAGGATCCGACAAAGAGAGAGAGACTTTTGTCTATATGGCTAAGCTCTCCGAACAAGCCGAGCGATACGACGGTAACATAATC	1	-	Chr1:9157685-9157804
Chr1:9157877-9158038	AJ_ArThaHiC2091110337136	GGAAAAACCCAGGAATTTCGCAGACACAGAGGTGTGTTCGGATCTCAAGGTTGAGATTCAGTCTTCTTCCGCCATTTGCGAACCATCTTCGAAACTCTTTTTATATTTCTCTCTTTCCCT	1	-	Chr1:9157895-9158014
Chr1:9158038-9158238	AJ_ArThaHiC2091110337146	TCTCGCATGCAAAGCGAGCGCTCTACCATTTGAGCTACATCCCCGTTGATGTTTAAATACGTAACCAAAAACATATATAGGATTAGATAAAACGGTGTCGTTAGGGAGCGAAAAGTTCGT	1	-	Chr1:9158038-9158157
Chr1:9178112-9178310	AJ_ArThaHiC2091110337249	CAGTGGTTATCATATTATTATTTCTTTTGTCTAAAAAAACAAAAAATTTGTCACTTTTTTCTTTGGCTCGGATCAGAAGATTTTAGGTCTCTCTTTCCTTTCCTATATATAGTAGTACCC	5	+	Chr1:9178173-9178292
Chr1:9219580-9219782	AJ_ArThaHiC2091110337332	TAGTTTTTTGTTTGCATGTTTGTTGCAGAACATTCCTGTAGCTTTCTTCTCGAAGCATGTTGAAGGAAGAAACAACCAAAACAAGACTGTGACGCTAAGATCAGACGCGTCGGATAAAAC	1	+	Chr1:9219617-9219736
Chr1:9220375-9220555	AJ_ArThaHiC2091110337361	AGGCAAGGTCAATATACATTCAAACTTGTCCGAAAATCAGCACCACCTGTCATCCGTTTGTGCCGCGCAAAAGCTAAACCAAAACAAAGATCAGTTGCAGAATATTCATCAGACCATTCT	1	+	Chr1:9220400-9220519
Chr1:9225274-9225478	AJ_ArThaHiC2091110337426	TGACCGTCGGGAAGTACACCGTCGTTAACCCTAACGAAGCTCATCCTTCTCCTCAATCTCACAAGATCTCCATCAGAGTACTACTCTCTTAAAAATCCGAGATTTTCATAACTTTGATTA	1	-	Chr1:9225359-9225478
Chr1:9225478-9225668	AJ_ArThaHiC2091110337437	CTCTTCAAAGCTTCCACCATGTTTCTCCGATCACTCAATCTCTGTACAATACTACTCTTCCTAGCGATTTCATCACAAGTTTCTCAATCTCTCCACTTCGAATTGCAATCTGGTCGAACA	1	-	Chr1:9225513-9225632
Chr1:9253681-9253848	AJ_ArThaHiC2091110337510	TGCTTGTTTTGCTTCTTTGAACAGTTTATTTTCCCAAAATTCCTTCTAGTGAGTGGTATGGATGATCAAGACTTGTCGGTATTGCAAGGTTTTACTTCCCGGCTTATAGTCCCCTTTGCC	1	+	Chr1:9253718-9253837
Chr1:9274526-9274702	AJ_ArThaHiC2091110337638	CAAAAGAAACATCTGAGAACAGTGATGACCAACACAGCGAGATCACAACAATTACATCGGAAGAAGAGAAAACAACTGAACTGAAGAAACCAGACAAGATTCTTCCATGTCCGAGATGCA	1	-	Chr1:9274559-9274678
Chr1:9275019-9275220	AJ_ArThaHiC2091110337660	TCCCTCTCTAAGCTGACGTGTAATTTCTCCATTTTCTCTGTCTTTATGGCTTGTGGCTCTGTGTGATCCGTTATTAATTTAATACCAACCTCAGCCTCTTATACATACTCTTGTCTCAGA	1	-	Chr1:9275101-9275220
Chr1:9590799-9590995	AJ_ArThaHiC2091110338483	CAGCGGCCAAAAGCCAGATCTCCATTGCTGATGCTTTCTGCAGAAAAGGATGGTTGTCGTAGTAATAGTGTGTACAACCCATACAATGATAGGGTTTACGAGACGAAGAGTGACTTTTCA	1	-	Chr1:9590828-9590947
Chr1:9628499-9628693	AJ_ArThaHiC2091110338632	TCCCCAATAATTCTATGATCAATTGTTCATCTAATGAGTTTATTTTGTATTCTTTTTTTTCAGGAATTGGACTTATTCACCTAATGCTTTTTAGTCATGAAAATTCCACGACCGAACTAT	5	-	Chr1:9628526-9628645
Chr1:9740780-9740949	AJ_ArThaHiC2091110338772	TTTGGACTTTGCGACCGGGAAGGCAACAATTCCGTCTAAGAAGTGTTGTGACGCTGTTGAAGATATCAAAGAAAGAGATCCAAAGTGTTTGTGTTTCGTTATACAACAAGCGAAGACAGG	1	+	Chr1:9740805-9740924
Chr1:9757273-9757501	AJ_ArThaHiC2091110338897	GGCTTTGTCTTGTTGAGATCAGTACAGGGTTGAAAGAAGCAGAAAAGTTCTTCAAAAGCATTCCTGAAAACATGAGAGACGACTCAGTCCACACCACTCTCTTAAGCTTGTACACAATAT	1	-	Chr1:9757334-9757453
Chr1:9783319-9783567	AJ_ArThaHiC2091110339080	GTAGCATCAAATTTTGAGATGCTGAGGTGGGGTTTTTGTTTATAGACAGGAGAGATTTACTACAGAAGCTGGAATAGTGGAATGAGAGTGAAAGAAGATCCGAGAAAATCGATGAGTCGT	1	+	Chr1:9783404-9783523
Chr1:9783837-9784069	AJ_ArThaHiC2091110339104	GTATATGTATAAACTAGTGTTCGTGTTGTGGCATTATATTTAAAGACAATGTCTCAAAGTTGTTGGAAAAGAAAAAAACAACAACATGGATTAGTGAAAAGCAGATCAGACTGTGTAAAC	4	+	Chr1:9783898-9784017
Chr1:9790266-9790506	AJ_ArThaHiC2091110339153	TAATAATAATAGTCTTTCAAGAAGCTGTTGTGTGGATGAGGGAGGAGCTGGACCAAGCTCTGAGTTTAGGGTTCTTGATCCTCCAAGAAGACCACATTCTGGTCTTTGGTTTCTTCTTCA	1	+	Chr1:9790363-9790482
Chr1:9829230-9829473	AJ_ArThaHiC2091110339415	AATGTCTCACGACAATCTAAACCCAGGGCTCAGGCAAGAAAACCAGGGAAGCGTGAAAGAGCTCACTCGTCCAAAGTTAGATCTAGCGAATAGCGATAGCGTTTTTGTTTGTATAACAAC	1	+	Chr1:9829327-9829446
Chr1:9829553-9829739	AJ_ArThaHiC2091110339422	GGTTAATGTGGAAGTAAGTAACCGACAAGAGTTGGATATGATGGATGTGTTGCTATAAAGAGTAAATGGGGTAAAAGAGACAGATCTATGACCCCAAATATTAAAGCAAAAGAAAAAAGG	3	+	Chr1:9829590-9829709
Chr1:9841345-9841593	AJ_ArThaHiC2091110339456	GATGTTGGTACGACGACAAAACTCTGCAAGGAGTCCTCAATTTTCAAAGAGGTTTCGAGCCACAAGACACCGATATAATTATTGCTTCGTTCCCCAAATCTGGCACTACTTGGCTCAAAG	1	+	Chr1:9841382-9841501
Chr1:9907237-9907462	AJ_ArThaHiC2091110339943	AAGGAAGACAAGAACTTCCGTGGGGAAAACTATATCAATTTCCTGTTAAGGAAACATGGTTGAGGAATACACTTTTTTGGTGTACTTTAAGACATGGGCCTGGTTATACGATTGGCCAAC	1	-	Chr1:9907271-9907390
Chr1:9912688-9912852	AJ_ArThaHiC2091110339977	TTCATCAACAACTCCACAACAAACAAACCCTTTCTTCTATCGGGTCTATTCGGATCCTCGATGTCTTCTTCTTCTACTCTTCTCCAGCACCCACATAAACCCATGAACAATGGTGGTGAC	1	-	Chr1:9912721-9912840
Chr1:9912852-9913052	AJ_ArThaHiC2091110339986	CAATGATCCCAAGCCGTTTCAGTGATTCTTCAAAGACTTGTTCATCAAGTGGTTTAGAGAGTGAGTTTCTCTCATCTGGTTTTAGCAGTCTTAGTGCTCTTGGATTAGGGCTTCCGCATC	1	-	Chr1:9912873-9912992
Chr1:9967282-9967532	AJ_ArThaHiC2091110340217	TTTAGATCCGTCGTACTTAGCACCGGCGGACTTGACGGCTAAGAGCGATGTTTTCAGCTTTGGGATATTGTTGTTGGAGATTATTAGTGGTAGAGAAGCCATTGATTTGAATTATAGTCC	1	-	Chr1:9967353-9967472
Chr1:9967917-9968149	AJ_ArThaHiC2091110340224	TCTCTCTTGCAACGGCGAATCCGCCGTCGCAATCTGCGATACTTATAACTGGAATCCTCGTCGACGATCTAAAGTACCGGAGAAACGTCATCCTCCTAAGCTTCGGGTTTTCAACTACGA	1	-	Chr1:9968030-9968149
Chr1:9993558-9993760	AJ_ArThaHiC2091110340302	CATTATTGGCAGCTTATCAAGACGAAAACGCAGAGTATAAGATCACTAGAAACCATATCAAGGCACTACTAGCGGTAAATTGTTATCCTATCATTGGTTATAATATTTCATTGAGAATCC	3	-	Chr1:9993617-9993736
Chr1:9993760-9993922	AJ_ArThaHiC2091110340310	GTGTGGCACAAATATTTCATAAGCCGCTTGAGAAGCTAGGGATCTCTCTTTTAAAGAAGCAGATTATGGATGTTTCACACAAATTTGAGGAGTTGCTAGAAAATATTGTTGTGAAGTACG	3	-	Chr1:9993779-9993898
Chr1:9993922-9994102	AJ_ArThaHiC2091110340313	CAGCTGAGCTAGAGAGGTTTCATAGAAAATTACTCGATAAGGCTATGAAAAAACAAAGCCTTAAGATCGGTGAAGAAGCAAGGATACTCGTTAACAACACCCTCGGAAAAATGAGCCTAG	1	-	Chr1:9993983-9994102
Chr1:10004075-10004233	AJ_ArThaHiC2091110340394	TGGAGCGGTTTCTCAACGGCGAGGCCTCGTCGTCTTCTTCATCATCGTTGCAACGATCGGTCAAGAATGCTCACAAGCAAGCGAAGATTCAAGAGCTTTGCAAAAGATACAATAGATTGG	1	+	Chr1:10004112-10004231
Chr1:10004233-10004391	AJ_ArThaHiC2091110340398	AAAGTCAAGAAGGCAGCTGCATTGGCGGAGACGAGGGCCGTGAATAAGGATGCGTGGTGGAAAGCAGATCCAAATGACGTGAAGGATCACGAAAAGGCGAAGAAGATGATGGAGAAGTAT	1	+	Chr1:10004258-10004377
Chr1:10014120-10014277	AJ_ArThaHiC2091110340579	GTGCAGATTTATTAAAAGAATAAAGTGGGATCCAAAAAGTCAGCGTGAAACATGTGATACGATATAACGACACGGTCCTATGACTAAGTCCACTCCAATCCAGTGACGTAAACAGCACCA	1	-	Chr1:10014122-10014241
Chr1:10054853-10055038	AJ_ArThaHiC2091110340584	GTGCCTCCTTTTTATGGATCTAAAAATGGAAACTTTGAGAAAGGAGTTAATTTCGCTGTTGCGGGAGCAACGGCACTAGAAACTTCCATTCTTGAGAAGAGAGGAATTTATTATCCTCAC	1	-	Chr1:10054871-10054990
Chr1:10055136-10055334	AJ_ArThaHiC2091110340592	TCATGATCTTATAATTGGTCTCAGTTGGAGTGTTTTAGACGTCTTCAATCTCTGAGAAGAATCCAAAAACACAAAAAAAAACTGATAGTTGCGTTTGAACCTCTGTTTTCTTGTGTGGGC	3	-	Chr1:10055155-10055274
Chr1:10055334-10055514	AJ_ArThaHiC2091110340597	TGATTCGATTACCGACACAGGAAACTTGGTTGGTCTCTCGGATCGTAACCATCTTCCTGTGACCGCGTTTCTGCCGTATGGAGAAACCTTCTTCCACCACCCAACTGGCCGTTCCTGCAA	1	-	Chr1:10055371-10055490
Chr1:10062247-10062494	AJ_ArThaHiC2091110340664	ACCTTTAGAACAATCTGATCTACAACGTTTATTAAATCCAAATATGATGTATTCTGAGCCAGATTTTTCTACATCGGTAAGTATAGATTTCATTTTCTTTTTCCAGTAACCAGTTATTTC	5	-	Chr1:10062327-10062446
Chr1:10063016-10063232	AJ_ArThaHiC2091110340703	GATAAATCTTAGTGGAGATCGAAGATATGATAGGGGTCTTTAATTTTAGTTTCAAACAAGAGAGACAGATTAAACAGAGCTTTCTTCATGGGTTTTTAACAACTGCATCTCATAAGCTTT	4	-	Chr1:10063065-10063184
Chr1:10063232-10063445	AJ_ArThaHiC2091110340712	TAAACAAGTCAAGATGGATCTCGTTGATGATATGTTGCCATTTACTCCTTCGTGGTTCCCCCCATCACCAGAACCATTTCCTTCAATAATGGTAATTCTTTTAAATAATTTATTTTCACT	3	-	Chr1:10063278-10063397
Chr1:10125995-10126227	AJ_ArThaHiC2091110340883	GGGAGCTTGTGTTGTCTTTGGCTTGTCTGGTTTGAGATCAGATGATCAGTCCATAACTTGTGTAAGATCTTCTTGTCCTTCTTCTCTTTTTGAGTGTATAGAATCATCAAGTGATTTTTA	3	-	Chr1:10126108-10126227
Chr1:10126741-10126919	AJ_ArThaHiC2091110340916	GTGTCAGTGTATATAAATATATGCAGCGTAAGAAGAGAAGGATCAGACCAAAACTATTGACTTAAAACACTGTTTCAAGTTTACTTCCATGGCACGTCTTACTCTGTTTCTGTCTTTTCT	3	-	Chr1:10126776-10126895
Chr1:10183918-10184141	AJ_ArThaHiC2091110341350	GCAAGAGCATGGAGACTAAGTTTTGTTACTTCAACAACTACAACGTTAATCAACCAAGACACTTCTGCAAAGGTTGTCAACGTTACTGGACCGCCGGTGGAGCTCTCCGGAATGTTCCCG	1	-	Chr1:10183938-10184057
Chr1:10194360-10194572	AJ_ArThaHiC2091110341435	CCCATTTTGATTGCATGATCCTTTGAAGTTTTTGAGTTAAGCTTTAGCAAAAAGGAAGAAGCTTTATTCATTTATGATTCTATGATTGTTGTGATGTTTCTATCAATCATTCTCCATTTT	5	-	Chr1:10194405-10194524
Chr1:10194572-10194770	AJ_ArThaHiC2091110341443	ACTTGTTGGGGTCTTGCGTCAGCTTGGTGATCTCGCTGAGTAAGTATTCAATTCGAGCTAATGTTGCGTCTCTTTTGGGTATCTCTACTGTTGAATGATTCTTTGAGCTAGTGGTGAAGT	1	-	Chr1:10194615-10194734
Chr1:10203191-10203354	AJ_ArThaHiC2091110341832	ACAATTTAAATTTAGTTCTTCTTCAAGCTTCTCTCTTCAAGATCACTACCTTACGTCTCTCTCATATTCATCTTCAATCTTCTCTGATGATTTTTTACAAGAACCAAAGTCTTTAAATTA	5	-	Chr1:10203211-10203330
Chr1:10236624-10236826	AJ_ArThaHiC2091110341880	AAAAATTCTCATTTGACTAAAGTATATTCATATATTGATGTACTTGTTACTTTACAGCAGGAGATCCGTAGAGAAGAGAGTAGTGAACGTACCGATGAAAGAAATGGAAGGATCTCGGCA	3	+	Chr1:10236697-10236816
Chr1:10287640-10287845	AJ_ArThaHiC2091110342039	GTCTCTCATCGTCCCGGATCGTTTCTCTTCACCACCAGAAACCCTTTCTCGCTCTTAAACTCCGGCCTCGTCCTTCAAATATCTCCGGTCTAGGTCACAGTACTAGTGTTGTTTGCTTCA	1	-	Chr1:10287678-10287797
Chr1:10287960-10288204	AJ_ArThaHiC2091110342053	TTGGTCGACATGGGATTGGGATATTTAAAAGCTGACGTGGAATCCTACGTGGTTAGATTTGCAGTCGTATTGATGCCAACAACGGTGGAGATTCAAGATTCTTTGATTGATTGTGAACTA	1	-	Chr1:10287977-10288096
Chr1:10303134-10303306	AJ_ArThaHiC2091110342113	TCCTTCTATATAATGAAACAAAGCTTATTGGTATTCCTCATCAACCAGAACTTTTATTCAAAGAGATCTATACAAACAGAACTCACCAATCTTATCTCTTTCCTTCTCCACCTTGCTTTC	4	-	Chr1:10303187-10303306
Chr1:10303306-10303518	AJ_ArThaHiC2091110342126	AGTTATCTATAGTCCACTAGTTGAATGCAGACATAATTGATTACCAACTTGGGACCATAGATTAGAAACATAATCATGTGTTGTGTCTGGTTGGATTGCTCAGGAGCTTGTCTTAACCTA	3	-	Chr1:10303315-10303434
Chr1:10340122-10340345	AJ_ArThaHiC2091110342152	TTCGATAATCCTTCCTCCAAATCGAATCAAGTCATATGGGGAAGCTCTTTGAGATCTTTGTATACATTCGCTACCATCGAAGAGTTCTGGAGGTGAGATCTTTGTATCTTTCTTGTTGTC	1	+	Chr1:10340226-10340345
Chr1:10340530-10340761	AJ_ArThaHiC2091110342158	CCTGTGTATCTTCTTTTTCTGAGTTTTAAAGCTCTGCTTGTGAACTACTTGATGCAGTCTTTACAATAACATTCATCCTCCAACCAAGTGGGTGTCAGGGTCGGATCTCTACTGCTTCAA	1	+	Chr1:10340591-10340710
Chr1:10340803-10341015	AJ_ArThaHiC2091110342166	CAGGAGTTAATTGTAGTTCGCTTGGCCATGCTGCTGCTTGTTGGATGCACCTTGTGATGTTTTTGTGTCATTGTTTTAGTTACTTGCGTTGGTTGGTGAGCAATTTGACCAAGGAGATGA	1	+	Chr1:10340828-10340947
Chr1:10371949-10372102	AJ_ArThaHiC2091110342202	GTTCCATGTTACTTCATCTTTGGTGATTCTTTGGTTGACAATGGAAACAACAATCGTCTTAGATCTATTGCAAGAGCCGATTATTTCCCTTACGGCATCGATTTCGGCGGCCCCACCGGC	1	+	Chr1:10371974-10372093
Chr1:10377765-10377992	AJ_ArThaHiC2091110342347	ATGGTAAGTGTTTTGTACTCGATATTGCGACTGTCGAAATGAACCGTCACGCGCAATTCCCGTGAACAATGTCCTCTCATGGCTCACTTGTATGAGTGATGAAGTTGATATAGAAATCGA	1	-	Chr1:10377777-10377896
Chr1:10377992-10378192	AJ_ArThaHiC2091110342351	GAAATTCTAGAAGTGGGTTCGATTTTGTCCGGTTTAGTTTGATCCGACCAATCATTGGTTATTTATGTGTGTTTCTGTAGGTGACAAGTTACCAATGGGTGCACCCGAACTAATGATGTC	1	-	Chr1:10378049-10378168
Chr1:10378192-10378352	AJ_ArThaHiC2091110342359	CCGAGGTATGTCTCCTCATCTAAATACTGGTCCGAAACCGGATCCGGACAGATTTTATGTAAACCGCTTCTATCAGTTAGTATACCGATTAATCGTATGGTTAAACAATTAGTTATCCGG	1	-	Chr1:10378209-10378328
Chr1:10380999-10381168	AJ_ArThaHiC2091110342446	ATATACGTTTTTTGGCAGATGGCAGAAGAATTCAATGTGAGATCAGGTGTAAAAGGGAACATACCACTCGGATGCTTTAACGCAATGTTCAATTACACGGGTTCTTGGCAAGTAGATGCA	1	-	Chr1:10381025-10381144
Chr1:10381168-10381355	AJ_ArThaHiC2091110342452	TTAACTTGAATGAGGCAATTTGTAGTTCGATCAAGTCAGATGCTAAGGGAAATTTCAGAGCAGAATGATGTTTCTTATATTTTCGGATAAAGATTGGTCTTTGGGGAACAAAAATGAGTC	3	-	Chr1:10381200-10381319
Chr1:10381786-10381988	AJ_ArThaHiC2091110342474	CGGTTTCTACGATTTTTGTAGAGTCAAAACCAGCAATGGTGTTGGTGAGAGTCTAAAAAAAATCGATCGAAAGCTCAAAAACTCCATCTTCTTTCCCCCAGGAACTCACAAACCCTAGAT	1	-	Chr1:10381869-10381988
Chr1:10381988-10382160	AJ_ArThaHiC2091110342484	CACAAAGTCAAACTATTTGTCTGTCTGGAAATGAAGAAAGGATCTATGTAATTAGTAACCAAAAGAAAATAAAGACCAGTCAACCTAAGAATCTTCTTGATATCACTCAGAAAGAAAAAA	4	-	Chr1:10382017-10382136
Chr1:10543366-10543610	AJ_ArThaHiC2091110342703	GCTCAGAAAGCTAAATCAATCCTTGAAGACGAAGAAGAGCAACAACAACAACAACAACAACAAAACGACGTCATTTTCGAGCCCTCGAATCCAACCATACGCAAAAGCATAGACAAGATC	1	+	Chr1:10543427-10543546
Chr1:10547074-10547302	AJ_ArThaHiC2091110342742	AGGTTCAAGCTGAGTTCAAGCCAATGTCTTTAGACATCAAGATCCATGATGTACAAGGAAAAAATTACCGATGTGCCATCCCGAAGTTGTGTAAGGAGATTATGCCTGAGAAATGTAAAG	1	-	Chr1:10547159-10547278
Chr1:10547302-10547514	AJ_ArThaHiC2091110342750	TTCTTCGGGTAAGCCGGTTTCTTCTTCGGCATTGAACTATGTAACTCTCGGAACATTCAGCTGGGATCAAGACAATGACAAAGTCAAGGTAAACCATTCAGAGTTTTCCTCAATCAATAC	1	-	Chr1:10547395-10547514
Chr1:10552518-10552691	AJ_ArThaHiC2091110342853	GTATCAAACCCTACTTTCCGGCCACCAAGATCGGTGGTATCGCCGTCGGCAACGAACTATACACTGACGATGACTCAAGCCTTATAGGGTTTGTTACATACATCCCCTCATTCCTATAAA	1	-	Chr1:10552536-10552655
Chr1:10597220-10597455	AJ_ArThaHiC2091110343006	TTGACTATTCACGTCAAATTATGAAAAAATTTAGTTGAATGTTAAAGAATATAATTTCTGTTTACAAATTGTATACTATATTGATCAAATAAAATGAACGGCCTTGTTTCAAAATGGGTC	6	+	Chr1:10597305-10597424
Chr1:10606854-10607058	AJ_ArThaHiC2091110343088	AACCCCTTTTGAGTCGTGGGAAGTCTCAGAACTCATGTATTCTAAAAAAGACCAACGGTTCTATTTGCTTGCTCCTGGAGGCAACTACTTATGCTCCTGGGATCTCAACTTCAAGGAAGA	1	+	Chr1:10606891-10607010
Chr1:10608696-10608871	AJ_ArThaHiC2091110343128	ATCCTCTGTTCTCTTGCCAAACTGATGTGATCTGGAACGTGGCAATGTCCTCTTGTCCTGATGACGATGAAGACTGGGTTGTTGGCATCAAGTCCTTGGGTGACCAGGTGAGTTTCTGTA	1	-	Chr1:10608716-10608835
Chr1:10608871-10609024	AJ_ArThaHiC2091110343132	TACTCAACCTTACGGACAAACCAATTCCAGAAGAAATCGTGACAGCCAAATGGATCGGAGCTTCCAAGGGATGGGCATTCTTCTTGGACACACAAGACCGTTGTGTACTCATCACCGACT	1	-	Chr1:10608893-10609012
Chr1:10655309-10655484	AJ_ArThaHiC2091110343613	TTGGGTGAAGGAACTTTCGCTAAGGTCAAATTCGCTAGAAATGTTGAGAATGGTGATAATGTCGCTATTAAGGTTATTGATAAAGAGAAAGTTCTGAAAAATAAGATGATCGCTCAGGTA	3	+	Chr1:10655310-10655429
Chr1:10663599-10663809	AJ_ArThaHiC2091110343644	AGAAACCATAAGCTTGGATCCGAATTCCTTCAGAAGAATGGATGACTACGGACCAAGCTCCCCTGCATCTTCCCCTGTTTCTTCCTTCATCTGCGAAGAAGAAGACGACAACACTCATGC	1	-	Chr1:10663642-10663761
Chr1:10868545-10868764	AJ_ArThaHiC2091110344193	TCCCTCGAACATCTGGCCTCTTCCTCTGTCACATCCAACACCATCACCGTCAGATCTTAACATAAACCCCTTCGGAGATCCCTTTGTGAGCATGGACGATCCACTCCTCCAAGAACTAAA	1	+	Chr1:10868645-10868764
Chr1:10868970-10869209	AJ_ArThaHiC2091110344199	GAAACTGTCTATTGGTTGATGGTACCACGTTCTCCTCGCAGATTCAGATATCTTCCCCTCGGAATCTAGGCCTTAAAAGAAGGTACAAAATTTAGTTTATCAACTTTTCTCGATCTTGGA	1	+	Chr1:10869031-10869150
Chr1:10877426-10877629	AJ_ArThaHiC2091110344306	TTTATTATATTTTGGACTTATCCTCATTTCTGTTTGCAGGTGGATGGTAAGTTGGTATCTAAAGATCCAATAGGGAAGGTTGAAAGAAAAATTACGGTGGAGAGTATAAAGCTAGAACCT	3	+	Chr1:10877499-10877618
Chr1:10893298-10893513	AJ_ArThaHiC2091110344423	ATGTTCTCACTATATTTTCACTTTTGTATTTGAAAATTTTTAGGAAAAATTTTGGATAGAAAATTGATGGGAGAAGATCTCTACTGGGCAATAAACGGAGGAGGAGGAGGGAGCTACGGC	3	+	Chr1:10893371-10893490
Chr1:10895954-10896121	AJ_ArThaHiC2091110344470	CACAGTCTTTAACATTGAAACGTTTGGAAACACAGGAAGCGTGAACACCACGGAACTTGTAGCCAAATGGCAAGAGATCGCAGACAAGATTGACAATGATCTGTTCATAAGATTAACTTT	1	+	Chr1:10895979-10896098
Chr1:11004309-11004513	AJ_ArThaHiC2091110344574	AGAGGATGTCGGAAAAGAAGAATGGTCGACATATGTCTACACTTTGAGGGATGATAATAAAGTCGATCAGGTTAAATATAATCTCTCCGTTGTTGGGGTGACTGCTTCAGGTGAAATTGT	1	-	Chr1:11004394-11004513
Chr1:11012255-11012433	AJ_ArThaHiC2091110344669	TAGGTCTTCTTCATGACCTTCTTTCTGGTAATATTAAGTCCATCACGTTTTCGATCAAAACTGAATAAAAAGTAAAAAGTTAATATAAATGTTGATGGTAAAAAACCCGTATGCTTCTTG	4	-	Chr1:11012302-11012421
Chr1:11015617-11015863	AJ_ArThaHiC2091110344714	GCAAAATCAGTAGCAAGGTGTCATTGTGTGTCGAAGCAATGGAGAGCCATCTTTCGCCGTAAATATTTCATCGAATTGTTTCTAACAAGGTCCAAGGCTCGTCCTCGTATCTTATTTGTT	1	-	Chr1:11015672-11015791
Chr1:11036821-11037033	AJ_ArThaHiC2091110344820	GGAATCTGGTAAGATGGTTTACGTGCAAGGCAAGTTTTACTGTATGAACTATAGCCCTTTTAGCGTTTTGTCCTATGAAGTTACTGGAAACCGGTGGATCAAGATTCAAGCTCCGATGAG	1	+	Chr1:11036870-11036989
Chr1:11250406-11250585	AJ_ArThaHiC2091110345298	CTGGACCTTTTATTGAGCTTTAATCCTTTATTGCTTGTTTCCATTCTTCAGGCGAGGCGCTTCTGAGCTTCAGAAATGCAGTTACTAGATCAGATAGTTTCATCCATCAGTGGAGACCGG	1	+	Chr1:11250431-11250550
Chr1:11296333-11296577	AJ_ArThaHiC2091110345489	TGAAGATCAACTTTAGTAAAGTGATTATAATGTATTTGTTTTCAAGTGGTTTGAGCTAACTTGTATTTGTTCTTAGATTGTAGAGATATGATTGGAAATGCTTTGATTCTCATGGGAGAG	4	-	Chr1:11296398-11296517
Chr1:11297173-11297366	AJ_ArThaHiC2091110345522	CATTGATCACTAACGGTACATTCCAAAACAATAATATATATAAAGTAAATAAAAAGATAGAAAAACAGAAAGTCACTCTGGACCACTCCCATGGCGTCGCTAGATTCTCATGTGTTGATG	3	-	Chr1:11297187-11297306
Chr1:11310932-11311118	AJ_ArThaHiC2091110345540	CCGGTAACAATCGTGTCCACAGAAATACACACCCACACACACAAATAATAAGTATTAGCTAGAATAATGCATGGGGGCAAAGACATTTCGCCAAAGACTACGAAATGATCCAAAACTTGA	1	+	Chr1:11310945-11311064
Chr1:11359718-11359946	AJ_ArThaHiC2091110345930	ATCGTTATAACCAATCGGAGAAATCACCGCTCAAACTTTGTTGCTAGGGATTTGAGTGAGTGAGAGAGGAAGATGGAGCAGCTAAAGACAATTGGAAGAGAGCTAGCGATGGGATCACAA	1	+	Chr1:11359767-11359886
Chr1:11360034-11360251	AJ_ArThaHiC2091110345940	ACGCTTCTTTTGGTTACATTTACGCCGTGAAGATGACTCACGACGATAATCTTCTTCTCAAGCGTACTGGTTACTTAGCAGTGACGTTGTTTCTCAACGAAGATCATGATCTTATTATCC	1	+	Chr1:11360083-11360202
Chr1:11360300-11360524	AJ_ArThaHiC2091110345952	ATGGCTTTGCATAGATTTCATCGCAAATCTCCTTCTTCTGTTTCGCATTTGGTTTCTAATTTCAGAAAGAGGTTATGTGATAATGATCCTGGTGTTATGGGAGCGACTCTATGTCCGTTG	1	+	Chr1:11360373-11360492
Chr1:11377784-11377942	AJ_ArThaHiC2091110345957	ACTCCTCTGTGTTGTAAGAACAGAAAAAGGAAGAGAGAGAGACATACAAAAAAAAAGGCTTTCTTTACTATGTTGGCCGATCAATCGTCTATGGTGGGTTCCCACTTTCTCTATCTCTCA	1	+	Chr1:11377797-11377916
Chr1:11378627-11378866	AJ_ArThaHiC2091110346016	GGAAATGAAAAGGAAGAGACTTTGCGGCTTTTGCATTATACATGACCAATAATTATGCTCTCCACCATTTCAGAACTCTAAACCGCCTCTATCACACCCGATCCAAGTGGGAAGATCCTC	1	+	Chr1:11378700-11378819
Chr1:11430314-11430501	AJ_ArThaHiC2091110346221	TCCTCCAAAGTAAAAAACAAAACACTGCAAGTAAGTAAGTTCTGTTCATATTCCTCTGTTTTTTTTTGTTTGTGTGTTTGTCAGATCCATTCTCTATAGCTTGTGAGCTGTGACCATTGT	3	+	Chr1:11430351-11430470
Chr1:11430668-11430909	AJ_ArThaHiC2091110346230	GATGCTTTTAGGGGATGCTTTAGTTTTGGGGACCCATAAATCAAATCACCTATGAAAAAAATGTGATAATGCAACAGAACTTGCACTGTGTTGTGTTAAAGTGTTTATTTTCAGATCTCA	3	+	Chr1:11430729-11430848
Chr1:11512776-11512998	AJ_ArThaHiC2091110346593	TAGTCTCATACCTTGGGATCAAAGATTCGATTAAGACAAGCGTTTTATCTAAGAGATGGGAATTTGTCTGGCTAAAGGTTGTCGGATTGGACTTAAAGAACTGTGACTTCCCTCCTAATG	1	-	Chr1:11512831-11512950
Chr1:11539489-11539675	AJ_ArThaHiC2091110346728	CAGCAAGGAACCGTCTTTCTTGCTCTAAGATCCGTTTCGGTTCCAAAAATGGGAAAATTCTCAATTCTGATGGTGCCCAGAAGTTGAATCTCTCAAAATTCCGTAAACCCGATGGCCAAA	1	-	Chr1:11539520-11539639
Chr1:11539675-11539894	AJ_ArThaHiC2091110346740	CCATACAAATATCGTAATCCAATTTCAATCACAAACATCATTAACGAAGATGGAGAAGACTATGATGTGCCGTCTCTTAGAATCACATCCACGTCGTCGTCTCCATACCCATGGCTACTC	1	-	Chr1:11539679-11539798
Chr1:11552783-11552941	AJ_ArThaHiC2091110346907	AACCCTAAAATTTGTGTTTTTGGTTCTCCGACCTAATAATGGAGGAGTCTCGAGGATCTTCTGATCAAGAAGATGAACAAATTGTTCAAGTCAGGGAAGCTTTAATGTGTCCCGACGGTG	1	+	Chr1:11552820-11552939
Chr1:11552949-11553123	AJ_ArThaHiC2091110346909	ATCTTTACGAACGGCGAGGTTCTTAAACTACACAACGGCATCTATCGACGACGATGTCTTTGACCTTCCTCTCGATGCGTTTGTGTGTAGACCACCGGAAGGGTTTGATCCAACGGCGAA	1	+	Chr1:11552950-11553069
Chr1:11565686-11565899	AJ_ArThaHiC2091110346974	ACTAAAAAGTTACGTTTTTTATTTGTACCCTGAGATAAAAATGTGACCTTTTTAGCTTCCTTGGTTTTATCAGTTCATATGCTTAGGAACTGTATTGATCAATGTTAAGTTGGAGAAATC	4	+	Chr1:11565735-11565854
Chr1:11578342-11578545	AJ_ArThaHiC2091110347060	AAGATATAAAAGTGCTTAATATGGATAAAAGTCCGAAAGATAAGAGTGGTCGACATAAGTCAACAGTTGTCGTTCGCCTACCTAACAGATCGTCTGCAGTGTTCCTAGCTCCAGTTTGTC	1	+	Chr1:11578391-11578510
Chr1:11702603-11702792	AJ_ArThaHiC2091110347442	TGAATATGGTTCCACATATTTCTTGGTGAGTTTTGATGTTAGGTCCGAGAAATTTAATCATGTCAAGGCACCGAAAATACTGACGGATCATCCTTGCACTTTGATAAACTATCAAGGGAA	3	+	Chr1:11702640-11702759
Chr1:11757137-11757303	AJ_ArThaHiC2091110347640	AGAGAAATCCTTCTTGCCAAATCGAGATATGGAATGGTTTTTCTTCTGTCATCGCGACAGAAAATACCAGAACGGATCTCGAATAAACAGAGCAACTAAATCTGGTTATTGGAAAGCCAC	1	+	Chr1:11757162-11757281
Chr1:11757356-11757516	AJ_ArThaHiC2091110347644	TATGGGTCGAGCTCCTTTTGGTGGTAGAACCGAGTGGGTAATGCATGAGTATCGCCTCTTCGACAACGATACTTCACAAGGATCACTAAACTTCAAGGTAACAACATCATAAACCAAACA	1	+	Chr1:11757369-11757488
Chr1:11925776-11925972	AJ_ArThaHiC2091110347878	TGTGTAATTAGGTAACTCAACTTAAATGTGGGAGCATAGTGGTAGGATGCACATTTGATCATCGAATTGCAGATGCTTTCTCCATGAACATGTTCCTTGTTTCTTGGGCTGAGATCTCTA	1	+	Chr1:11925849-11925968
Chr1:11926075-11926233	AJ_ArThaHiC2091110347882	ACAACAAATGACCTAGATAATATCCTCACAAGCCGTATCTATTACATCAAAGAAAATGCGTTGGAAGATCTCCAAACTCTAGCAAGCGGTAGCTCCCCCAAGACTGGTTATGGTCAGAGG	1	+	Chr1:11926100-11926219
Chr1:12046831-12047023	AJ_ArThaHiC2091110348036	TCTCCGTAACAGAGCCTCCGTCGTTGACTCATCAATCCGCCGTCTTCATTCTACTCTTGCCTCTGACAAACATCTCGATCCCAAGCTTTTCGAAAAGGTTAATCTTTTATAACCTATCTC	1	+	Chr1:12046880-12046999
Chr1:12158081-12158265	AJ_ArThaHiC2091110348141	AAAGTGGACTGCTAAGGAAGGGTTAGGTTTTGATCCTGATAGATCTAAGGTTGTTGATGTGAAGGCTAAAGTGAAGGAAAGTGTGAAACTTGATAAGAAGGGAGTAGGTATTAATGGTGG	1	-	Chr1:12158122-12158241
Chr1:12158275-12158440	AJ_ArThaHiC2091110348148	GTTACAGAGTTTGAGGAGAGATCTGATGTCACTTGCTGATGATCCGACTTTGGAGGATTTTGAGAGTGTTCCTGTGGATGGTTTCGGTGCTGCGTTGATGGCTGGATATGGATGGAAGCC	1	-	Chr1:12158297-12158416
Chr1:12158461-12158665	AJ_ArThaHiC2091110348155	GAAGATGAAGAATCTCGATCTACCTCTTCAATCTGGTAACGCAGGTTCCGGACTCGAATTCGAGCCTGAGGTTCCTTTACCTGGTACTGAGAAACCTGATAATATCAGTTACGGTTTAAA	1	-	Chr1:12158498-12158617
Chr1:12177919-12178114	AJ_ArThaHiC2091110348289	CACTCTCTCGCCGTCGTTGGCTAAACTCAAGCACCTTGATGGGATTTACTTCACCGATCTCAAGAACATCACTGGTTCTTTTCCTCAATTCCTTTTCCAATTACCAAATCTTAAGTACGT	1	+	Chr1:12177992-12178111
Chr1:12178114-12178281	AJ_ArThaHiC2091110348293	TACTCTTCCGGCTAACATCGGTGCGCTAAGCCAGCTTGAAGCGTTCAGCCTCGAGGGAAACCGGTTCACCGGTCCGATCCCGAGCTCGATATCTAATTTGACTCTGTTAACTCAACTCAA	1	+	Chr1:12178139-12178258
Chr1:12178281-12178460	AJ_ArThaHiC2091110348297	TAGGGGTCGCTAATCTCAAGCTCATGTCGTATCTCAACCTTGGAGGTAACCGTCTCACTGGAACCATTCCAGATATTTTCAAATCCATGCCAGAGCTCCGATCTTTAACTCTCTCCCGCA	1	+	Chr1:12178294-12178413
Chr1:12178460-12178615	AJ_ArThaHiC2091110348303	CTCGAGTTAGGCCATAACAAACTCTCCGGGACGATTCCAAACTTTTTATCAAACTTCAAGGCGCTCGACACATTGGATCTCTCCAAGAATCGGTTCTCGGGTGTCATACCGAAGAGTTTC	1	+	Chr1:12178473-12178592
Chr1:12181368-12181531	AJ_ArThaHiC2091110348370	TCTCCCGCAACAAATTCTCTGGAAATCTTCCTCCGTCCATTGCATCACTCAAACCAATTCTCAATTACCTCGATCTAAGCCAGAATAATCTCTCTGGGACAATCCCGACCTTTTTATCAA	1	+	Chr1:12181393-12181512
Chr1:12280467-12280711	AJ_ArThaHiC2091110348857	TTTTTAACTTGGATTAATTACGAATTTCTAGAGAGTTCTCAAACTATGTGGAGGACGAAAGGTCCTGTTTAACAACAAGACAAAGGATAAAGGCAAGAGGAATAAGCAACTTAACCAGCT	3	-	Chr1:12280472-12280591
Chr1:12284868-12285069	AJ_ArThaHiC2091110349013	CGAATGCGGAAGGAAACTTGTTGTTCAAGGTGAAGGATCCTTTTTTTAGTCTTCACGAGAAGAGGATCTTGATGGATGGTTTTGGAACTAAGGTCTTGACTTTGAAAGGGAAGGTACAAA	1	-	Chr1:12284950-12285069
Chr1:12287739-12287942	AJ_ArThaHiC2091110349078	TTGTTATCTTTAAAAGGTTTTCTAGAGGATTTACCAGGAAACCTATGGCTTTGATCAAGAAATTGCGCAAAGCGGTAAAATCATAATTTCTCACATCACTAATTAGATGTTACGTTTGTT	4	-	Chr1:12287811-12287930
Chr1:12287942-12288101	AJ_ArThaHiC2091110349087	AGGAGTCGATCTCGATGCGCTTCTCGACATGTCCACCGAAGATCTTGTCAAACATTTCAGTTCCCGTATTCGCAGAAGGTTAGCTTCTTTCTTTGAACCAAACAAAACGCTTTTGTCTAA	1	-	Chr1:12287958-12288077
Chr1:12288134-12288315	AJ_ArThaHiC2091110349093	AGACTTTGTGGATTTTTAGAGTTTCATCGATCCAACAATGATTAGTTCCAATCTCTGTCTCTCTGAAATTTTATTTCGTGATTAAGGTTTCGAACATTGTGGTTGTAATGTCTCGTCATG	3	-	Chr1:12288160-12288279
Chr1:12294515-12294747	AJ_ArThaHiC2091110349107	CACTACTCTTGGGGTTTTAATCCTTCCGAGTTGTGTTGATGTTATTCCAAGAATTAGCTAACTGTAACGAAGATGTTCTTGGCAACCATCTTTTGATGGGAGTCTGGCTATTCGATGATC	1	+	Chr1:12294564-12294683
Chr1:12302626-12302834	AJ_ArThaHiC2091110349317	GTCTACTATGTCTCCAAGATCCGTTAAAGCCATAGAAATATGAGAAAGTCAAATAAGAAACCAAATAAAATTCTTACAACATCTTTCACATTAAAATAAAATGACTAACACACCTACGCA	4	-	Chr1:12302667-12302786
Chr1:12304330-12304485	AJ_ArThaHiC2091110349422	ATAATATAGTTAATTCTAAGAGTTTCCTTACTGAATTGGCCAAGGTTAAATTGATCAAAGTCTTGATTTATTATTGTATGTACGTGATACAGGTATGTTCGATTTGTCTGTGTCCGAAGA	4	-	Chr1:12304354-12304473
Chr1:12304485-12304698	AJ_ArThaHiC2091110349425	TCGGCTCCGAAGGTGCTTTCATGCACTGTCAGATGTATAGTACCACGACACCAGATGGTCAAATGATCAATGTAATTAAAACTCCTGGTATGTGCTCAATTAAAACTTGAGATTTAGCCT	1	-	Chr1:12304579-12304698
Chr1:12304698-12304916	AJ_ArThaHiC2091110349438	GCAAATAATTGCTGGTGATCAAAACATGGGTACGTCCGTGTCTAAGCCGGTTTCTGATGATAAGAAAAAAGGTACGTCAGTGTCTAAGCCGGTTAAAAACATTGTTCTAGTGGGGCGTTC	1	-	Chr1:12304749-12304868
Chr1:12309152-12309391	AJ_ArThaHiC2091110349555	GTGATATAGGTCTGTTCGATTTATCGGTGTCCGCTGAATTTATCAGTAAAGAAATCATCAATTGCCTTAGGCTTGCGGAAGGAGGATTACATGTTGTTGTGTTAGTTCTATCCGTGAGAA	1	-	Chr1:12309164-12309283
Chr1:12320782-12320940	AJ_ArThaHiC2091110349852	TCATTTATGTCTGAATTGCCTGTCATTGCAAGCTGATGCACATGCATGCTTGATTACTTATTGTCTGATCACATATTTCAGTTATGTAAAACATAAATATTCTCACCTAAATTTCTTTCT	4	+	Chr1:12320807-12320926
Chr1:12323661-12323896	AJ_ArThaHiC2091110349958	TTCTATATTTTGTAGGGAATTAAAATATTTTACTAATACAAAATTTGTTTTTTCTTTTTCAGATGGCTGAAGATCAGAACACAACTGACCGTTGGGAGTTGCCTTCAGCGTCAGAGCCCG	3	+	Chr1:12323758-12323877
Chr1:12389092-12389258	AJ_ArThaHiC2091110350144	ATTAATTAGTAATTTTTGATTAAAGCGTAGGTGATACTCTACATCACTATGATACAACAATAGATCTCTACGTCAAAAACACTCGAGGACTGGAAGCGGTTGATCTTATCAATGTCGACC	3	+	Chr1:12389129-12389248
Chr1:12449087-12449333	AJ_ArThaHiC2091110350277	GTGGTTCTTTTTCACTCCAAGGAATAGGAAGTATCCTAACGCAGCTAGGTCAAGTAGAGGTACTGCAACTGGTTATTGGAAGGCGACAGGAAAGGATCGAGTCATTGAGTACAATTCAAG	1	+	Chr1:12449172-12449291
Chr1:12451704-12451896	AJ_ArThaHiC2091110350365	AGAGCTTGTGATGTATTATTTGAAGAGGAAGATTTGTAGGAAGAGGCTTAGAGTTAATGTTATCGGTGTTGTTGATGTTTACAAAATGGATCCTGAGGAATTGCCTGGTAAATTTCGTCT	3	+	Chr1:12451741-12451860
Chr1:12451976-12452191	AJ_ArThaHiC2091110350373	AGACAGTGGTTCTATTTCACTCCAAGGAGTAGGAAGTATCCAAACGCAGCTAGGTCTAATAGAGGAACTGAAAATGGGTATTGGAAGGCTACAGGGAAGGATCGAGTCATTGAGTATAAT	1	+	Chr1:12452025-12452144
Chr1:12585282-12585492	AJ_ArThaHiC2091110350636	TTCAAGCATCCAGACATTGCGTCGGTTTGCAGCGAACCGTAACCGATTCACGGGAGAAATTCCATCAGGGCTCACAAAACACCTCGAGAACTTAGATCTCAGTTTCAACAGTTTAGCGGG	1	+	Chr1:12585331-12585450
Chr1:12590022-12590214	AJ_ArThaHiC2091110350722	TTCAATACACTAGTAAGAGTCACACAGTGATCGTCACCGGTAAATTAGTTGGCAAACTCCGCCTGCTCTTCGATAATTCCGAGGAGCTTCTTCACTCTTCTTATATCTCATTTCTCTCTA	1	-	Chr1:12590059-12590178
Chr1:12595918-12596077	AJ_ArThaHiC2091110350899	TCCTTTTCTCTCCGCAAACTATTCATTTCATTTCTCTCCAAGATTTTAATTTTGTTTTTGATTCATCGATCATTTCATTCACTTCAAAATTCTCTTCCGATTATTCCAGAACAGAAGCGT	4	+	Chr1:12595943-12596062
Chr1:12657718-12657886	AJ_ArThaHiC2091110351005	CTACCGATCTTGCAGCGAAATGGCAAGAGATCGCCGACAAGATCGATAACGATTTGTTCATAAGATTAACGTTGAGCTCAAGTAACAAGACGGTCAAGGCTTCTTTCATGGGAATGTACT	1	-	Chr1:12657743-12657862
Chr1:12658062-12658267	AJ_ArThaHiC2091110351015	ATAAAAGCAACAACCTCCGTGGTTTCCCCGCTGGAATCTGTCCCGGTCTCGGTGCTGGTGGGCATTTTAGCGGTGGAGGTTACGGAAACATGATGAGGAAATACGGTTTATCGATTGATA	1	-	Chr1:12658064-12658183
Chr1:12658321-12658489	AJ_ArThaHiC2091110351017	ACCATTCTCAACAACTACGTCCGCAATCTCCGTTACTTCAACGGTACTACACGTAAACCGGTAGCGATCGTAGCCGCGGCTCACTTCACTCATATCCAAGCTACAATCAACTGCGCCAAA	1	-	Chr1:12658370-12658489
Chr1:12871689-12871847	AJ_ArThaHiC2091110351202	GTTGGCGTTTTCATTGTCGTACATGATCTACGATCTCATTTGTAGCCACTTTGATCAAGTCCTTAGCATTGATAATGCGGTTCATCATTCTGTTTGCATTCTTGGTTTTGTAGCTGGACT	1	-	Chr1:12871716-12871835
Chr1:12872140-12872387	AJ_ArThaHiC2091110351219	CGGTTGCGGTTACGGGAGTTTAAGGAAAAGGGTGTTTGCGGTTCCAATCAAGCCCTAAGTAAGAGATCGTGTCTCCGAGATTCTCACTAACAAAACCCTAAAACTAAAATTGTACGTTTA	1	-	Chr1:12872268-12872387
Chr1:12879380-12879617	AJ_ArThaHiC2091110351266	CCCAAGCCAACAAGGAGATACTCAACCAAATCAAGTTCTACTCGACCAAATGGAGTGGACTTCAAAATCCATCTAGAAGTTGCCTATTTTGTGATAAATGGTCGAGTCATAATCCAATTG	1	+	Chr1:12879429-12879548
Chr1:12883081-12883312	AJ_ArThaHiC2091110351354	CGAGGGCAACGGTTGTTAACGGTTTTTGTTTTAATTTAAACTTAAGAAAATCATCTTACCTTTTCGATATTACATATCAAATAATCATGTTATTCTTTAATTATAATTGATGTTGAGGTT	5	+	Chr1:12883094-12883213
Chr1:12935932-12936083	AJ_ArThaHiC2091110351591	CGAAAAACCTTCACCTACGATTAAACCAGATTCACCGGAGAAACTAGATCTAGATCAAGAAAATCGCCTTCAAGAGAGAGAAAAGTTCGAGAAACGATGCAACGATTGTGCCCGATTCTT	1	-	Chr1:12935952-12936071
Chr1:12937144-12937307	AJ_ArThaHiC2091110351698	ATGTTGGTGTAGATGGAGAGCCACGAGTGTCAAAGGATATGATCGAGGTAATAGATGAGGAGAAGAATGTGATTCAGTTGAGGGTGTTAGAGGGACCTCTGAAGAAAGAATACAAGAGCT	1	-	Chr1:12937164-12937283
Chr1:12947757-12947908	AJ_ArThaHiC2091110351735	TTGTTGATCTCATCAAGCCTTTTTGTTGGTTTTTATTTGGAATTCTTATTTCGATCCATTTTGTGTATCATTAACAAAGCAGCCTATTTTGGAGGCAAAAGGAATGGCTGTGTGGCTTGA	3	-	Chr1:12947777-12947896
Chr1:12947955-12948111	AJ_ArThaHiC2091110351740	TGACCCTGTGTTTCCTATAATGTTTTGTCATATTTTATAAGATCATTGTTTTTAGTTTTTATATTGATTTGATTTCTTTTAGCAGAGTGGATGCAAGTTTGTGGTGAAAACGAGGATATC	5	-	Chr1:12947968-12948087
Chr1:12977552-12977744	AJ_ArThaHiC2091110351989	TCCAGTTTCAATTAAACCGGAAACACTTTCAGTTTCAATTTCAATTCAACCGGATCTATCTTCTTCTTCTTCACCATGCTATTTTCTACGGCTGAGCTTAACGGAGAATCCCTGAATCCG	1	+	Chr1:12977625-12977744
Chr1:12977744-12977980	AJ_ArThaHiC2091110351991	CACATTTTCCCGATGACTTCCACTCTAATCTCCTCAAACCTCTCTTCCTCTTTCTTCCCAACCCAAAATATCCACCGAATTCGAATCCCGACGACTTCAATTCCCGGAAGTTTCAACATT	1	+	Chr1:12977757-12977876
Chr1:12984243-12984467	AJ_ArThaHiC2091110352085	GATTACACTTGTCTCAAAACCATTCTTCGAGAAATCAAAACTTCACAGAAAAGATCAGAAAGCCAAGGTGTCTTGAAACGCAAGCTATCTGGTCGCCGCAACTTCAGCGGCCTGACAAAG	1	-	Chr1:12984336-12984455
Chr1:12984467-12984628	AJ_ArThaHiC2091110352096	TATGCTGTTTCTATATACATTAAAAATAGGCTTTAAATTGGATCTGGATTCTTGAAATTTTACAGAGAAATTCAAGAAGGGAAACAAAGATGAAGTTTGGAAAAGAGTATGTTGCTCAGA	5	-	Chr1:12984485-12984604
Chr1:13116142-13116355	AJ_ArThaHiC2091110352475	ACAGCACATGTGGGCGTTTAATCCGGGTCATTACCCGGGTCGAATCGGGTCGGTTCAGCTAGGGTCTATGTTAGTGGGAGGTCAACAGTTAGGGTTAGGTGTTGCAGAAAATAACAATTT	1	-	Chr1:13116164-13116283
Chr1:13321353-13321545	AJ_ArThaHiC2091110352620	CCACACAACTACTTCCATGACGTTTCCTGATCTACCTCTCCCTCAAACTCACCAAGTTTCTACGTTCCAGTCTCTTTTATCTCATCAACATCATCATCAACCAACACTCTCCTCTCTTCA	1	-	Chr1:13321390-13321509
Chr1:13340810-13340982	AJ_ArThaHiC2091110352869	TTAATATTTTAGCAATTAGAAAATAAATGATCCCAAAATAAAATAAAAAATACCTTTAAACTATATCCAAATCAGTTCAAGAAAATTATAAATCTAACTAAACTATCATGCCGTTGAAGA	6	-	Chr1:13340827-13340946
Chr1:13340982-13341221	AJ_ArThaHiC2091110352876	ACTTATGGGTACGATGGATCAAAGTGAATCCCTTCGTCTTCTTCGAAGTACTCTATCGACACATTTTTGGTTTTCAAGGATTAGGTTTATGGTGAGCAGCTGAGAGCTTATTGATTGTGT	1	-	Chr1:13341054-13341173
Chr1:13341531-13341707	AJ_ArThaHiC2091110352885	TAGTGGACCCGGAGGAAGAAGATAAGTTTGAGGATAGTCGTCTGGAAGATTCAGAAGTATAAGAAGTCCAAGAAGGACAAGAAGGATCATCAGCATGAAGCATCTTCTTCCTCTAAGCCG	1	+	Chr1:13341556-13341675
Chr1:13341773-13342006	AJ_ArThaHiC2091110352893	GAACAAATCATCATCTTCTTGCTCTGTTGCGGAAACAGAAAGCAGAATGGAGAAGGAGACATGATTCACCAAACAGACGCACTCGCAACAAAGAAGAATGAACAGGCTGATGCCATGGAT	1	+	Chr1:13341822-13341941
Chr1:13455188-13455403	AJ_ArThaHiC2091110352904	ATCTTCATTCGGGTCGGATCTTCAACAACCCGAAAACTACCAATCTCAGTTCCATTACCAAAACACTATCACTTACACTCACCAAGACAACAACACTTGCATGCTTAACTTCATTGAGCC	1	-	Chr1:13455236-13455355
Chr1:13455435-13455652	AJ_ArThaHiC2091110352910	TCTTGTTTTTTGTAGTACATTTTTTTTTGTATTTCAGGAAACTCCGATGGCGGATCTCTTCGGTGGTGGCCACGGCGGCGAGCTTATGGAAGCACTTCAACCTTTTTACAAAAGTGCTTC	1	-	Chr1:13455521-13455640
Chr1:13455652-13455807	AJ_ArThaHiC2091110352920	ATAAATTTATTTTAGTTTTGATCTATGGAGGTTGCTTATTTCAAACCTCGTTGATCACTTTTATTTCTGTATAAACCAAAAAACCAGTCTTTGAATTTTTTCTAAAAAGACAGGTTTTAT	6	-	Chr1:13455676-13455795
Chr1:15973758-15973957	AJ_ArThaHiC2091110353205	TTGGGATTATAGGACCACAATGTTCTGTAGTAGCTCATATGATATCTCATATGGCTAACGAACTTCGTGTACCGCTTCTTTCGTTTGCTGTAACCGATCCCGTAATGTCGCCGTTACAGT	1	+	Chr1:15973795-15973914
Chr1:15973957-15974202	AJ_ArThaHiC2091110353215	TGATGATGATTTCGGTAGGAACGGTGTTGCTGCGTTGAACGATAAGCTTGCGAGTAGGAGATTGAGAATTACTTATAAGGCGGGTTTACATCCTGACACGGCTGTTAATAAGAATGAGAT	1	+	Chr1:15974018-15974137
Chr1:16850837-16851087	AJ_ArThaHiC2091110353732	CCTTCTGCTTTATCTCTCCCTATCTCCTTCTCTAAAACCCGATCCTCTTTTCTCTCCAGAAAGAAGGTAACTTTTTACTCTTCTTCTCCACTTTTGGCTTCAAACTCTGTAATCAGTGTC	1	-	Chr1:16850944-16851063
Chr1:16851087-16851270	AJ_ArThaHiC2091110353743	CGCCACGTGTTCAATTCTCTCTACACGTGTCATCTTCCCGAAGGCATTCTCAGATCGCGGGCAAAATCCTTTTCTTATCAACAAAAAAAATCTCAATAAAATAAAAAGATAAAATCTCAA	3	-	Chr1:16851139-16851258
Chr1:16852233-16852433	AJ_ArThaHiC2091110353797	AGAAGAAACTACAAAGAGAAGAGAAAGAGATCGTAAGGATGATGAACACAGAAGAAAAATATGCCGCCAAGAAACGAGAGTGGGGATTACATCATGTCCCGGCTCATGAGATAGGGCAGA	1	-	Chr1:16852278-16852397
Chr1:16852433-16852666	AJ_ArThaHiC2091110353805	GTTAACAAAATGTTTTACAAGGTCGGGAGATCATGTTGCCAAAAGTCCCGAGAAGAGAGAGCTTCGTCGTCATGGCAGTGAGAAGATTCATAGGAGAAGTTCTCATGGTTATGGTGAAGG	1	-	Chr1:16852511-16852630
Chr1:16865903-16866120	AJ_ArThaHiC2091110353897	TTTTTAAGTAGCTAGTGATCGTTTTTGAAATTGGTTTCTGTGAATTTAATTTATAGGTCCTGCTTTATTGGTTGATGTTCCAAGAGATAAGAACATTTCAGGTTTGTTGAGAGTTTTCTA	4	-	Chr1:16865953-16866072
Chr1:16875540-16875738	AJ_ArThaHiC2091110354066	AAATTTGTTAAGTCAATAATTAGAACTGCGCACACGTTAATTACAAATAGTTGAAGAATAAAATGATCATTTTTCCCTTCTCTAAATAAATAATATATTTTTTGTTTATTAAATAAATAA	6	-	Chr1:16875619-16875738
Chr1:16963412-16963585	AJ_ArThaHiC2091110354506	CAGAACTCGTTAATCGGTGCCTCCTCGACGGCTTTCTCTCGCTATCGCTCTGTTTTCCAATCTCCTGCGACGATTTCATCGGATCGATTCATTTCGACTTTCAATTTCTCTGGTTCCGGT	1	+	Chr1:16963437-16963556
Chr1:16995110-16995354	AJ_ArThaHiC2091110354606	AGGCTGATCAAGCTTCGGCCGTTAACAAGACTCTATCTCCTTTATCACCTTGTTACTAGCTCTACTTGATGATTAGAAGAGCTAGTCCTCTTTTTGATATCACTAGCTCAATTGGCCCTC	1	-	Chr1:16995175-16995294
Chr1:16999695-16999871	AJ_ArThaHiC2091110354630	CTCTTTGGTTTCCTTCCTGCTCTTCTCTGTGTTTTCTCTGCTAAAGTTCTCGCCGCTTCTTTCTCCTTCTGGATCGGCAGGTCTGCTTCTCAATTGCACTGTTATGTGATTCAAATTGAT	1	+	Chr1:16999732-16999851
Chr1:17075858-17076085	AJ_ArThaHiC2091110354814	GGTTTTCAGTTTTCTTGATCTAGTGGTAAACTGGTAATTCATGTTAGATACAAAACCTTGGTTTTTATCATGTTCATGTACCATGTCTTGATTTGGTCTGAAATTTGATAGAAACTGGTA	4	-	Chr1:17075918-17076037
Chr1:17232205-17232379	AJ_ArThaHiC2091110355046	TGATGATCTCGATCAAATCTTCGATACGGTGACAAACTCTGAATTTTTATCGGTGAATTTGGAGATGGATGATGTAACTGTGAATTCTGAAGGGAACACGGAAGAGCAAACCCTAGCGGT	1	-	Chr1:17232206-17232325
Chr1:17232385-17232562	AJ_ArThaHiC2091110355049	GACTATGTTGCGAGATCTCAAGGAGTTGGAGAAGCAAAGAGATCATCAAACGCAAACCCTAATTCATCAGCCGTGTTCTGCAAGGGTTTGCATTCAAGATTATGTAACTGTGAATTTCGA	1	-	Chr1:17232419-17232538
Chr1:17232589-17232794	AJ_ArThaHiC2091110355056	TTTGTCTTCTCTCGGACGCAGAGATTGCGATCATAGCGACTCCTGTTTCTTCTAATTCCAACGCCGCTTTCTACAGTTTTGGCCACTCCTCTGTTGATAATGTCGTCGCTGCTTTTCTCG	1	-	Chr1:17232639-17232758
Chr1:17270712-17270912	AJ_ArThaHiC2091110355202	GTTGTGGAGAAACATAGAATGTCCGTTTATGTATCGTCTTCGTGATAAAAGTAACAGAGGGATATGCATCAATGGAGTTTTGTATTTCATAGGTTGGATCAAATGTAGTACCATGATAAT	3	+	Chr1:17270749-17270868
Chr1:17276972-17277124	AJ_ArThaHiC2091110355335	GGATTTGAAGATATTCTCTTGTGGTTCTTGTGATTTTGGAGCTAAAGGTGTGAAAGCTGTGCTTGATCATTGCTCGAATCTCGAGGAGTTATCGATTAAGCGTCTCCGTGGATTCACCGA	1	-	Chr1:17277005-17277124
Chr1:17277124-17277284	AJ_ArThaHiC2091110355341	ATCGTAGATCTGTTAGTATCGGCGACGAAGCGCTTGTTAAGATCTCTCTCCGGTGTAGGAATTTGAAGAGACTTAAGCTTAGAGCTTGCCGTGAGCTCACCGATGTAGGTATGGCTGCTT	1	-	Chr1:17277141-17277260
Chr1:17380021-17380227	AJ_ArThaHiC2091110355740	GTTCGTCCTGGTTTACTACAATTTTTCCAATGAAAAGGTCTACAAGTTTTCTGATCTACCATGTGGGGAGAACCATCATCACGATGTTCTTGTTCTTAGGATTTTTAGGGAAGATCGGCT	1	+	Chr1:17380108-17380227
Chr1:17380287-17380511	AJ_ArThaHiC2091110355745	TTTCATGGAAGTGTCAACTCTTAACTTGCCGGTTTTAGTACACCCAAGTTACTTCATCGACGATAAAAAGCTCGTTGTGTGTTCTTGCGACCAAACTGGCCAAGCTTGGATCTATGTTGT	1	+	Chr1:17380336-17380455
Chr1:17394907-17395099	AJ_ArThaHiC2091110356248	TTCTTCGACAACACGAATTACACGAATTACACAACCTTTCGTTTTGTGATTGTTGATTTCAGGTTGTTGTTTTCGAGATCAGAAGTCGGGCGATGGAAAAACTAAGGAAGAAGCGAAGGA	1	+	Chr1:17394956-17395075
Chr1:17396854-17397022	AJ_ArThaHiC2091110356301	CCACATCGAGAAACATCGTAAGCTTCCACTTGCTTCGCTCTATTGAACCCTAGATCCAATTCTGTATCTCTCATTTGTATCAATAATTTCCTTTTGATTCGAGAAATTTGTAGTTTAGAT	3	-	Chr1:17396891-17397010
Chr1:17397022-17397255	AJ_ArThaHiC2091110356308	ACAACAAAATCAACGAACTGAATAAAGCGATCGCGTTGGTTCTCTTCTTCAAAACAAGCTCTCTCTGTCCCTCTCTGTCTCTCTCTTTGGGTAATCGGAAAAATCAGAAAAATGGGAACC	1	-	Chr1:17397100-17397219
Chr1:17486314-17486511	AJ_ArThaHiC2091110356777	AAGTTATACTAAACTATGGGCATAAGCCATTTATGCAACTTCCAATGCTTTTTCCTCAAACGTTTATTTATCATCGAGTATTGAAGATAGATAGATCATTGTAAGAGATAACAAGACGTT	4	+	Chr1:17486351-17486470
Chr1:17508628-17508819	AJ_ArThaHiC2091110356925	GGAGGATCTTTTAACATCCTTCATAAAGCTTGATGCAACCAAGTACGAGGTTTTGAAACCTAGTCATGATAAGTTCCTCAGGGACTTCACAATAGGTTTCATGGCAGCTGGGAGAGATTC	1	-	Chr1:17508640-17508759
Chr1:17508860-17509077	AJ_ArThaHiC2091110356933	AAGTCTCTCCATTGAAATGCCAGAGGTCGAATTTTCCAAAGCTCTTGACGATGTTGGAGATGCGATTGTGCATAGGCATATTACACCGAGGTTCGTGTGGAAGTTACAAAAATGGATTGG	1	-	Chr1:17508886-17509005
Chr1:17509077-17509306	AJ_ArThaHiC2091110356946	CATCTCAGCTTATATTCAATCATCAAAGGTACCAAAACTTCTCAGCAAGTACCACGAAAACTAAAGTCAATGATGGGCTTGTACCTCTTTTCAATCACTTTGCAAATGAAGAGATTGTTG	3	-	Chr1:17509079-17509198
Chr1:17590682-17590833	AJ_ArThaHiC2091110357016	GGCTATCTATTACCAAGTAGAGACTATATATGACACTACTTCTCGATATAAACTGATAAGTTTTGATGTTAGATCTGATAAAAACACTGATGGATCACTGTTCGTATCCTATAAACTACC	4	+	Chr1:17590695-17590814
Chr1:17590854-17591020	AJ_ArThaHiC2091110357022	TGTTTTTATGTGATGGAGGGTTCAATAAAATGGCGCATCTTGGAGGCTACTATGGTGGTGAGATCGTTTTGGTCAAATGGCTTTTTATTTATTTTTTGGGCCCTAGAAGTGAACTGCACT	1	+	Chr1:17590891-17591010
Chr1:17598522-17598675	AJ_ArThaHiC2091110357191	TCCTAGACGCCCCGTTACTATCTTAGGTGGAATGGAAACCAATGCATGTAAGATCAGTTGATTTCAAATTTCATTTAATGTTTCTAATATATTATTAATAATATTGTATCTACACTCTTC	4	+	Chr1:17598556-17598675
Chr1:17598675-17598846	AJ_ArThaHiC2091110357193	GGGTTCGATATTGCAGAAATTTCTGAAAACATGCAAGATGATGAGGTGTCATTACATCATGCAGCTTTATCTATTGCTAACCTTTTTTCTGATCATGCTTCCCCAAATAGTAACTTATAA	3	+	Chr1:17598688-17598807
Chr1:17601088-17601279	AJ_ArThaHiC2091110357264	TTATTTATATATGTTCAAATATTAATAATAAGTAAAAAAAAGTATAGAGGCATACATACTGTAGTTTACATTTATGACTGAAGAAATTAGGTTTTGACCAAAGATGGAGCAACAAGAGAA	6	-	Chr1:17601089-17601208
Chr1:17693538-17693718	AJ_ArThaHiC2091110357529	TTCACCATCTTCAAGTCACGAGTTGTCCAGATCAGGCGACGACAAACTGTACGGACCAGGACAGGAAATTATTGGAGTTTCCATTGAATTTGGAGTACCTTGAAGCTGAGTTTTTCTTGT	1	-	Chr1:17693563-17693682
Chr1:17760348-17760589	AJ_ArThaHiC2091110357686	TTCTTAATGCACCTGTGATTCATGATGATGAGGTGGAGGTACTTGATGTACCTGTTTGGGAGGAAGGTGCTGCTTCTAACACTATCACTGATCAAACTCATATGACTAGCTCAGACAGTT	1	+	Chr1:17760433-17760552
Chr1:17760701-17760880	AJ_ArThaHiC2091110357693	AAAATGGAGATTGGTGAATGCTCTAAACGTAAAAAGGATAAGCAAGTTGTTGATGATGCACTTCGCAACGTTAGGCAATGTCGCAAGGATCAGGGGATTAGGTTTTATCCTGTGTCAGAC	1	+	Chr1:17760726-17760845
Chr1:17760924-17761099	AJ_ArThaHiC2091110357698	ATGCTTTCAGTTTCTTAGGAATACCTGCTCCTTTTACAGTTTTTCTTTGTGGCTGGAGGGGATTCTTTTTGGTGCCACAATGAAGCTTTCTAGTAGATCGTTACAACACAGTGGACTAGA	1	+	Chr1:17760937-17761056
Chr1:17767672-17767900	AJ_ArThaHiC2091110357831	ACTATGCTCCCTAAATAGTTTTACTTGTAAAAACCAAAAAAATGTTGTCAAATAAAATAACTGGGATTGTGTGTTTTATTATCTTTTCAGGGTCCAGACGGATCATCATCGTCCGGACCA	3	+	Chr1:17767733-17767852
Chr1:17785537-17785726	AJ_ArThaHiC2091110357855	AATTGTTGACTGTTACCTCAACAACAAGTCTCCTCCCAAGACTACTATTAACCCTGAATCAGCCAAGTTTTGGTGGGAAGAGCCCGATCTTTACCGTGATTGTGACGATCTGTCTGAGTT	1	+	Chr1:17785574-17785693
Chr1:17935257-17935423	AJ_ArThaHiC2091110358290	GCTGAATACAACGAAAGATTTGGATGGGTTAGGATTTCGACGGGTGGTATGCAAAGGCATTTTCGATGAGCAAAGATCGATCTATGTGGGTCCAAAGCCTAGATCCATGTCTAAAAGTTC	1	+	Chr1:17935282-17935401
Chr1:17943928-17944154	AJ_ArThaHiC2091110358474	AAACAGAATCAATGGCGACTACTCATGCAGTGATGGGTGTGATCAGGTCAGTTATGCCTGCTTTTCGCAATAAAAACGACAAAATCGCTTTCGTAGTTCACGCTTCTTTAGCCGTTTCGG	1	-	Chr1:17944011-17944130
Chr1:17986197-17986428	AJ_ArThaHiC2091110358513	TTAATGAGATTACCGGAGAACAAAAGTGTAAGAGTTATCGCAGGTTGTCGGATAAAATGTATATTCAGATGACAGATGGAGTTCCTCCGCCACCAGAGCAAAGTTCGTTAGACCACCGGG	1	+	Chr1:17986234-17986353
Chr1:18025206-18025456	AJ_ArThaHiC2091110358633	ATACGATCATAGAATGGTCTTTAGCTTTTTCTTGTGAACACGTAGAATCTGGTTAGGTTCTCAGAATAGTTTCACGTTTTTATAATGTTACAGGCTAAATGGTGCAAGAACTATTGGCAG	3	-	Chr1:18025277-18025396
Chr1:18025644-18025815	AJ_ArThaHiC2091110358642	TCCGTTTCCTAACATGGAGCACATTTCTGATAACTACGGAGATCTGGAACTGGAATATAGCTCTGCCATGTTAAGCTCGCTAGAGAAGTACTTGCCGCCGGAAATGCTCACGGCGACTAG	1	-	Chr1:18025672-18025791
Chr1:18025815-18025968	AJ_ArThaHiC2091110358647	AAATCGAGAGAGCGGTTAAAGAAACTTCGACTTTGATCTCTTTTCTTGAAGGGATCGGCAAGAGATGGCGTTGGACGGTGACGAAACAGTCGCAGGTGGAGATTCTCAACCACCGGTGAC	1	-	Chr1:18025837-18025956
Chr1:18169092-18169302	AJ_ArThaHiC2091110358809	AATATAAAAATATTTTTAATCTTTCTTTGATGCCAAACATCTTTGAGGTTTTGTCTAGCTATGTCTAATACAAGATACGTATAGGTACCCCGATGATGTCAACGACCGTAGATGGTTCCC	3	-	Chr1:18169093-18169212
Chr1:18170026-18170180	AJ_ArThaHiC2091110358839	ATTTTGGCCGTTGACAATATATGGGTTTCGTTTCTTTAACTAGTATCCACTTGATCAGAACGTGATATAAAATAATATTTTGGAACTTAAAAAGATGTCAAGGGTCGTGTTATCCTCCAG	4	-	Chr1:18170049-18170168
Chr1:18174032-18174209	AJ_ArThaHiC2091110359051	GATGATTTCAAGTTTGATTTTGTGGAGAATGATAGAGTAGGAAAGGAGAAAACATTTGGATTTAAGATTGGGGATCACACTAAAGTTAATCAACATGCCAAAATCGTATCGACCAATGGG	3	+	Chr1:18174069-18174188
Chr1:18182120-18182272	AJ_ArThaHiC2091110359118	TTTAATCTTTCCATTGTCTTTGCGTCTTCTTCGATCAATTTATCAAATTAGGGTTCCAACCTTTTTTCTTTTTTTTCCCCGTTGTGTGTTAAGTCGGCGGAAAAACTTAGAACAGAACAA	3	-	Chr1:18182121-18182240
Chr1:18182272-18182485	AJ_ArThaHiC2091110359122	CCCAATTAGATGTTTTAAAACAACAAAAAGATCAATAGGCCCAATTATATCTTATCTTAATAAAATGAAAAAGCAATTGCATGAGGAATTATGGATATATATAAATTACATGGGCTAGGT	5	-	Chr1:18182330-18182449
Chr1:18187257-18187479	AJ_ArThaHiC2091110359179	TTTGGTTGAAGAAGATAATCTCTGGAAACCAATGATGATGCTTGATGATTACATAGCGAAATCGAAGCTCAGTGAGAGTTTAACCTCTACGGTTTGGTTAGCGAAGCACAAGTTAACCGG	1	-	Chr1:18187288-18187407
Chr1:18198882-18199042	AJ_ArThaHiC2091110359588	AAGAGAAAGCAGCTAGATGCCAAGAGAGGCAGAAACCATCAAAAATCAAAATTCGTGATTTAGTTAGATAGGAGATTTTTGATCTGAGCTTAGTTCATGTCTTTAGCTATAGAAGGATAC	3	+	Chr1:18198895-18199014
Chr1:18226137-18226290	AJ_ArThaHiC2091110360041	TTCCCATATGGGAATTGGCACTGACATGCGGGATAACCGTAGCTTCGAGGCTCATCGCTTGCTACTTGGTGAGGATCATCGGAGTGGTGATAAGGTGGATCTTCAGATCCATGCAGCTGA	1	+	Chr1:18226150-18226269
Chr1:18226575-18226728	AJ_ArThaHiC2091110360058	ACCCAAAGAGGACATCGGCTTGGGACATGAAGAAGATTATCATGGACCAAAAACACATTGGCATAGGCGTAAAGATCCGGGATGAATCCGAGGCGGAGACTGCCGCAAAAACAATATTCT	1	+	Chr1:18226588-18226707
Chr1:18226728-18226938	AJ_ArThaHiC2091110360067	TGTAATATAATATTAATTAAAATGAAATCGTTAACTTTCGAATGAAATATCAACCCGTGGTGTACCGCGGATCAATCTTTAATTGATAAACATATTACGAAAGTGCTGGACTAGAAAAGT	5	+	Chr1:18226801-18226920
Chr1:18436450-18436618	AJ_ArThaHiC2091110360462	TTGGACGATGGGATTCGGTAGGGACAACGTTAATGGGAGCTATAAAATAGTGAGAATGTTGTTTGATCGTCATTTCGAGAACCGCTATTGCCAGATTCTAGATGTTAATATTGGGGAATG	1	-	Chr1:18436499-18436618
Chr1:18436618-18436824	AJ_ArThaHiC2091110360467	ACCTGGCTGGATCAACGTTTTAAACCCTTCCACTGGAGAATTCCTTAGATTCTCTTCTGGTCGAGATCCACGGTTAATCAACGACTTCGAATGCGTCGGTAATTTAAATCTCTATTGTTT	1	-	Chr1:18436705-18436824
Chr1:18478908-18479108	AJ_ArThaHiC2091110360493	CCCTAAAAATTCGTATTTTCCAGGATGACTTTGGTGCCGGCCATTGGTCGCGAGCTCTCGAATCCACCGTCCGATGGGATTTCTAATCTTCGATTTTCTAATAACAGCGATCATTTACTA	1	+	Chr1:18478933-18479052
Chr1:18487501-18487698	AJ_ArThaHiC2091110360545	TATAAGACAATCAACCATCCACGAATTTCCACCTGTAAGTTTTCATTTTCTTGATCCCATGATTTTTCATTATGCATAGGACAACTTTTTAATCGTACGAACGACTTGGTAGGTCATCTT	3	-	Chr1:18487567-18487686
Chr1:18487698-18487864	AJ_ArThaHiC2091110360555	TAACTTATCGTGAATGAATATACATTCAGATCAATGGAACTATGTTTGTAGAAGGGTTATTATCCTGTACACTCTGTATCAAACATTTTATACAAGCTAGAAGCATTGCCAGAAGATTCT	4	-	Chr1:18487709-18487828
Chr1:18488057-18488274	AJ_ArThaHiC2091110360560	AAAGGAAGAACATTACTGGAAATACAAGGATCGAAATCTATTATAATTCTTCATTAATTAGCTTTTAGGGCTTATATATATACCAAGATTTAAACAAGGTATTCTGGTTTGTATCTAAAT	5	-	Chr1:18488119-18488238
Chr1:18508224-18508444	AJ_ArThaHiC2091110360812	AAACTCGTCGATGTTTCTGTGTGTATGTTCCTTAGGTATGGAGGGAGTTGACAAAGAGAAAGTCCAGAGGGTTGTCTATGAAATGAGTAAAGGATCCAAGTATTTTCAAAATGAGGAGCG	1	+	Chr1:18508285-18508404
Chr1:18508512-18508724	AJ_ArThaHiC2091110360825	ATTAGCCGGAAACTATATATAAGCTTTATCATATGAAGGTGGTTGATAAAAGGATCTTAGAGTTAGAAGCTACACGTGACCTATCCAGAATTTGGCTTCATGTTGATATGGATGCTTTTT	3	+	Chr1:18508605-18508724
Chr1:18561937-18562088	AJ_ArThaHiC2091110360846	GTAGAAGCTCACTCTCTGTGAACGAAACATTTGCCTTTTGTTCGGAACGAAATCTCACAAATTGGTTCTATGATCTGCGCGATTCGCGTCGTCTTCTCTCTGGATCTGAAGTAATTGATT	1	+	Chr1:18561950-18562069
Chr1:18562119-18562330	AJ_ArThaHiC2091110360853	TAGCACCATTGAAGCGATTCATGGAAGGCATTGTTGTATTGGTTAAGAAACACAGCCATTGAAGCGATGCTATCATCAAGGTTTTCCTTTTTGGGGATCGGCAGTTCCAGTGAAGTCAAT	1	+	Chr1:18562168-18562287
Chr1:18777612-18777789	AJ_ArThaHiC2091110360938	ATGTGAAGACATTAGAAGGTCAAAGAAAGAACTTCTTGATGATCGATGTTCATTGCTTTTCAGACAACGGTTCCGTGGTAGCTGAGGAAGTAAGTATGACGGTTCATGACAGTTCAGTGC	1	-	Chr1:18777646-18777765
Chr1:18777789-18778012	AJ_ArThaHiC2091110360944	AGCGCTGATCAAAGCGAGAAAGAAGAGGGTGAAATAGTAGGATCTGTGGAAGATGTGGAGGTTGTGTTTTACGACAGAGCAATGAGACAATGGAAGTTTAGGTATTGTTACTGGAAAAGT	1	-	Chr1:18777869-18777988
Chr1:18778046-18778240	AJ_ArThaHiC2091110360955	CACAAATTCAGAGATTTTCTCAGAATCAGATCTCAGATTGTTGCGAGTATCAACATCGGGGGACCAAAACAAGCCCGAGGAGAAGTGAATCAAGAATCAGACAAGTGTTTTTCTTGCACA	1	-	Chr1:18778085-18778204
Chr1:18779531-18779770	AJ_ArThaHiC2091110361045	AGAGGGACCTTTTTTTTATCTTGAATGATAGAAGAAACAGAGAATTAGGGTTTCATCTAATCTGCCATAGTTATGGATCCGCAGGTGGTGGTCGATAAGAAATCTGAGGAGCCTGATCTG	1	+	Chr1:18779628-18779747
Chr1:18917564-18917792	AJ_ArThaHiC2091110361936	GGTGCTGGATGAAAAGAAAATGGATTTGGAAAAGCTCTACGAGAAGGTGAAAGAAGTTATGAAGAAAATGGTTGCTTTCGCTGAAAACCCAAAAAAAGAAGGTTAATTTTACTTTGCTAA	3	+	Chr1:18917601-18917720
Chr1:18917792-18918009	AJ_ArThaHiC2091110361952	CTTCTTTATAAGTCGATGAGACTCACATCCTCTAAAGCGTGTTGTTTCTTGGGATCGAAAAAGAGAAATATTTGAAAATCAGTCTCATTACTTGATCATTGTCGAGTTCTTGGTAAAATC	3	+	Chr1:18917890-18918009
Chr1:18920630-18920803	AJ_ArThaHiC2091110361955	TCCTTGGATATGCCAACAATGTCCACAATCGAAGCTGCTTCGTGCCGAATCGCCTAGGTTTTCTCAAAGTCATCTCAATGCGATCTTAGCCGTGACTCGAATCCTCTCCAAAATCGTCGA	1	+	Chr1:18920655-18920774
Chr1:18954392-18954617	AJ_ArThaHiC2091110362067	CAAGGTGGGAAATTCAGATCCTCCGACGTCTCTCCGATGACACAAACCCAAACCCATTTCTCCCAAAACTCTTAGCTTCATCAGAATCCTCTGAATTCATCGCATGGGCTTTACCTTACT	1	-	Chr1:18954450-18954569
Chr1:18977091-18977320	AJ_ArThaHiC2091110362140	AGAACGTAAGGCAAGGATTTTGTTTGCAGCCATACTTGGAGAAAGCAGAACTAGATCTCTTCCTCTTCTCAATCCTTGACAAGTAATACCTCTTCATGATTTCTCTTTACCAAACTTGCG	1	+	Chr1:18977200-18977319
Chr1:19015494-19015705	AJ_ArThaHiC2091110362916	TGTGAAAAGATCAAAGCGATCTCTTGTTGTCTCACATAAAAGTCAAAGAACGAAACTCCATCTTCTCTCTTAACTCTCATATGTGTCTTTGTTACAGTTCCTCTGAATTGGTAAAGAGCT	3	-	Chr1:19015538-19015657
Chr1:19026370-19026613	AJ_ArThaHiC2091110363206	GTGTGGATAAACCTCATGACAGTGTTAATACCTAATTTCCCTAAATTTTCATTTTATTGGTATAACCGTCCTGACCTAACTTACTTCCTCGACAACGATGATGCTAAGAGGCTTGTCATT	3	+	Chr1:19026407-19026526
Chr1:19028794-19028972	AJ_ArThaHiC2091110363216	TGTTTTGAAGCTTCAAGAGTTTTCAGTGACATGGATCTTAATGTTTTGATTGAGATCGATGAAGAAAGTGCAGAAGCTGCGGCTGCTACTGCTCTAGCTTGCACAGTTGCACTTGTGTGG	1	-	Chr1:19028841-19028960
Chr1:19029536-19029705	AJ_ArThaHiC2091110363247	GGTCCACGCGGCAGTCAATGGAGTATAGATAGAGAATTCACTTTCGTGTAGTCCCAGGTCCAAGGATCTCTTTGAGAATTTCTTCAAGCTGATTTTGCTCAAGTTGATTTCCTATCTTTT	1	-	Chr1:19029586-19029705
Chr1:19126448-19126628	AJ_ArThaHiC2091110364297	GGCTGATAAAGTTGGAAGCTTGATTGGGAAAGGTGGAGCTGTGGTGCGAGCTCTGCAAAACGAAAGCGGTGCGTCAATCAAGGTTTCGGATCCAACTCATGATTCAGAGGAGCGGATTAT	1	+	Chr1:19126473-19126592
Chr1:19154220-19154388	AJ_ArThaHiC2091110364304	TCCCTTTTCAGTGTCCTTTCAATTTCTTTCGACGAAACTTCATTTCTCAATTTCTTTTGATTTTGATCGCTTCGAAGAACGAATCAATTTAAGCCTGCCACAAACAAACCCTAGAATACG	3	+	Chr1:19154257-19154376
Chr1:19154731-19154936	AJ_ArThaHiC2091110364310	ACGGTATACAAAGTGATTCACCGTCCGAGTTCTCGTCTATATGCACTTAAGGTGATATACGGTAACCACGAGGAGACTGTGAGACGTCAGATCTGTAGAGAGATCGAGATTTTACGAGAT	1	+	Chr1:19154780-19154899
Chr1:19156732-19156948	AJ_ArThaHiC2091110364426	CAGTGTGATTAGTGAACAATGAGGAGCTTTTGGTTAGGTTGTTAGCGTTTAAACTTCATTTAGTTTGGTCACATTGCTTCGATTTAGCCACATACTCATCGATCTGTTTTTTTGTCATTG	3	+	Chr1:19156781-19156900
Chr1:19156997-19157159	AJ_ArThaHiC2091110364434	TATTATTCACATCCATTAATGTAGTTTTATTGAAAACTTTGCAAATTTTCAGATGGCACTCCCTCCCTATGATCCGAATTTCACATTGGCTTTTTCATACGGTAGACGCGATAATGTCTT	3	+	Chr1:19157022-19157141
Chr1:19246023-19246219	AJ_ArThaHiC2091110364933	TGAATAATAAAAGTTTTGATCCTATAAACTGCCAAAACAGAAAGAGAAACATTGTATTTATGTTTTCATTTATAAATTTCCAATGAACAGAAAGCTACTACAAAACTATTGGCTTACAGT	5	-	Chr1:19246052-19246171
Chr1:19250519-19250710	AJ_ArThaHiC2091110364989	TTTATGTGGAAGGTTGGATCGTCAACGGACGGTTCTAAATATACGACAATTTCGTGATGGACAAGCTTTCATCGTAACACTCAAGACCACTACCAATGATTTTGCATGCGGCATTCTGAA	1	-	Chr1:19250543-19250662
Chr1:19278073-19278245	AJ_ArThaHiC2091110365158	CTTACATCGACAGTGGAGTTCCCGGGAAGATCAATGAAGTGTACAGAACACAGTTTCAGCAACAAATTTGGGCCTTGAGAAGCTTCCCTGAGGGTCAAAGAAATTGTTACAACTTCAGTC	1	-	Chr1:19278090-19278209
Chr1:19282268-19282430	AJ_ArThaHiC2091110365262	CTGCTATTCAGGTCCCTCCCGGGAATCTTGTAAACACTGAGATCAAAGAGAAATTGAAGTCAACTTCAGTAGTATCCGAAACTGATAAGTGTAGAGTAATGGAGGAGATAGCCAAGGAGT	1	-	Chr1:19282287-19282406
Chr1:19287937-19288109	AJ_ArThaHiC2091110365423	TATCAGACGCGGATTACATCGATAGTGGATTAACCGAAAGGATCAGTGATTCATACAAGTCACAGCTTCAGCAACAGACTTGGACCTTAAGAAGCTTCCCTGAAGGTCAAAGAAATTGTT	1	-	Chr1:19287966-19288085
Chr1:19293912-19294068	AJ_ArThaHiC2091110365766	AAAAAAAAGTATTCTATATGTTTTGTTTGCCTTGTAGCTTCGTTTTAAACTTATTATTAAAGTGGATCGGTCAATGTTTGAGGAACCTTTGAATTCTCATTCAACTCAGAAATAGAGACT	5	+	Chr1:19293937-19294056
Chr1:19294965-19295148	AJ_ArThaHiC2091110365885	CGTGATTGCTAACTGTTGCGACAATATAGATCCCCCTCCCACGAGATTACCTCCCGAGACAATCCATCAAACTGTACAGCCTCAACAAGACATTGAAACCGGACAGAGCAAAGCCCTAGT	1	-	Chr1:19294993-19295112
Chr1:19298166-19298394	AJ_ArThaHiC2091110365916	TCGAATTGAGGATGTTAATGGGATCTTGAATCTTGATAATATCACAGCTGGTGATCTCCTTTATATCCCACTTGATTCCGGTAAGAAAGTTTCGATTTTTATGCTAAAGTTAGGGTTTTT	3	-	Chr1:19298263-19298382
Chr1:19335629-19335861	AJ_ArThaHiC2091110366280	TTTTGATCCATTACATTCCTAGAGAGACGTTTTTATGTTCATTAGTAACCAATTAAAAAAGGATAAAAGAATTTACGTTTTGTTATAATTTTCAAGTGTATAAACTTCTAATTTGGATGA	6	-	Chr1:19335682-19335801
Chr1:19359762-19360004	AJ_ArThaHiC2091110366454	CCATTTTTGTTGGCAGTTCGAGATTGACTATCAAAACGGTGAACATATTGTATCTGTTGACGGTTACTTTGACAAATCCGGTGTGATGCAAGCACTTGAATTCAAAACCAACCGGAAGAC	1	-	Chr1:19359765-19359884
Chr1:19388790-19388985	AJ_ArThaHiC2091110366822	GGCATACAGTCCATTCGGTTCAGCTATATCAATAGTGGGAAACCCATTGATGGATCCCTCCATGGCCAATCGGATAATACTTACACGCAGACGGTATACGAATTTAGAAGAGATTACATT	1	-	Chr1:19388854-19388973
Chr1:19423715-19423878	AJ_ArThaHiC2091110366953	ATCGCTTACAGATTTTTCAGCAGTTTAAAGTTTGTTACTTGATCACTTACTTGTGAATTGAATGTGTTTTTTAGGGCTTGCAACGTTTTTGTACAGAACATAAGATTAAACTATCAAAGG	4	-	Chr1:19423735-19423854
Chr1:19442568-19442734	AJ_ArThaHiC2091110367121	CCCTTGTTGCTCTCTTTGTCAAGAATACAGAGAGCTCAAGATTAGGAATCTTGATCCTTCTCTAGGTACTAACTCAAAACGTCAGATACAAATCTATATTTATGGTCCAGGAATTTTATT	3	-	Chr1:19442603-19442722
Chr1:19553832-19554029	AJ_ArThaHiC2091110368091	TTCTAATCTAAGTTAATTATGAAATTAAAGAAACTTTTTTCGTCTAACATGAACGGAATATTCTGTTTTGTAAACTAAGCATAAGAGCTTCATGATCTTTCGCTTCTTAACTCTTATTTG	5	+	Chr1:19553869-19553988
Chr1:19556205-19556447	AJ_ArThaHiC2091110368120	CATGGATCAATACAAAGTGTTGTCCATGGTTTTTGATTTCCGAGAGCTTACGCAAACTTTTCATGTTTTCACATTGGGACAGAGTCAATCTTGGAGGAGAATCCAAGGCATTAATGATGG	1	-	Chr1:19556268-19556387
Chr1:19620423-19620672	AJ_ArThaHiC2091110368300	CTACTACGACCACTACTCGTGAGACACAGAGGAAGTGAAGAGGATAAATATTTGTTTCGTGTTCGTGGTTTTCATGTTTGTTTGCTTTGATTAGTGTTTGTTGCGTTCGTGAGGTTATGC	1	+	Chr1:19620484-19620603
Chr1:19633275-19633454	AJ_ArThaHiC2091110368547	TTTTGGTGTATAAATACACATTGCCTTCTCATATTTTTACGATCATCACTTGTTTGTATTTTGAAACTTTGAAAGCTCTTAAGAAGACGAATTACAAAACCTTGAGAGGATTCAATACAC	4	-	Chr1:19633311-19633430
Chr1:19664082-19664247	AJ_ArThaHiC2091110368628	TTTCTTGGCCGTGTACGACGGAGTAACACAGCAGCTAGACGATTCCATCTTCGCCGCTGCTGAGGAACTGTTTGATCTACCGACGGAGACAAAGAAGAAAAACGTAAACGAGAAGCCTTA	1	+	Chr1:19664107-19664226
Chr1:19673529-19673701	AJ_ArThaHiC2091110368846	TTATGAATGTTAGTCTCTTCCATGTGTCAGTATATTATTGGATCTTGTTGGAGCAACTTGACAACATATAAAAGCACGAGGCAGCTCAATACTATCATTCCAACAAGAGAAGTGCTTGAG	3	-	Chr1:19673558-19673677
Chr1:19710085-19710299	AJ_ArThaHiC2091110368854	TGAGTGTTGCAACTTTGATCTGTTTAACAGATTAGGCTTCCTAGTGACTTGCCATATGAGTTGCTATATGGTAGAGCAGGATACTTGTGGGCGTGTTTGTTCTTGAATAAGCATATTGGT	1	-	Chr1:19710132-19710251
Chr1:19759155-19759313	AJ_ArThaHiC2091110369379	TGCTGATTCACCTGGATAAAGGTGGAATTTTGTTCGCTTATGATGCGTGAATGATCATCTGGGTGTTTTAGGGTTTGGTTTTGATTTCAGGGTTTATGTGGGGTTTGGTTAATCTATGCT	1	-	Chr1:19759182-19759301
Chr1:19821329-19821564	AJ_ArThaHiC2091110369506	CGAAGGTGGAGCTGGGAAGATATCTCCGCCGTTAGATCTGGATCTTAACTTAGCTCCTCCGGCGGAATAGGCCGTGAGTTTTTTTTTTCTTATGTCGTTTCTTTAGACAAAAAAAAATAA	1	-	Chr1:19821421-19821540
Chr1:19821709-19821951	AJ_ArThaHiC2091110369515	CAAAGAGATTCGTTACAGAGGCGTTAGGAAACGTCCATGGGGAAGATACGCCGCTGAGATCCGAGATCCGGTTAAGAAAACTCGAGTCTGGCTCGGTACGTTCGACACCGCTCAGCAGGC	1	-	Chr1:19821832-19821951
Chr1:19821958-19822127	AJ_ArThaHiC2091110369528	CTATAAAAAGAAGCTCTTCTACTTCTTCTCGTTACCACAAAACTCTTTCACCGATCTTCTCGTTCCATTCTTCTTCCTAATTACACCATGCCCAACATCACCATGGGTTTGAAACCCGAC	1	-	Chr1:19821996-19822115
Chr1:19832054-19832222	AJ_ArThaHiC2091110369742	TTGCTCGAGACAAAGGGATTACTGAAAGTTCTAGAAGCAACAAAACAGGAAGTAGCAGTAGTTATAGTAGTGTCAAGATCAGTTTGCAAAGAACTCAAACGATGCCAAATAACATGGGAA	3	+	Chr1:19832079-19832198
Chr1:19896292-19896499	AJ_ArThaHiC2091110369785	TTTTAAAGTGCGGTGAGTTGGAGAAAATGAAGGAACGTCTTTCGAGTATTGATGAGTTTGGTAAGCCTGACGCTTGTACTTACAATATACTGATCCATGGATGTTCTCAGAGCGGGTGTT	1	+	Chr1:19896341-19896460
Chr1:19958359-19958604	AJ_ArThaHiC2091110370106	AAACAAAAATCTCGGCGAGATTTTACTATAGAAAGTTTCATTCCTTCTAACATGGCCGTTGATTCAACTGATCAACGGCGAGATTTTGTTGTAAGGATCGACGGTGAAGACAATGGTGAC	1	+	Chr1:19958468-19958587
Chr1:19958630-19958787	AJ_ArThaHiC2091110370111	GAGGTGAAGAAGACGACGGAAGCTTTGATTTCATGCGGCGGAGTAGTGAGAAATCGGAGGAGCCAGATCCACCGTCGAAGCTTATAAATCAATTTCTCAACAAGCAAAAAGCTTCCGGTG	1	+	Chr1:19958655-19958774
Chr1:20027992-20028231	AJ_ArThaHiC2091110370690	TCATTTGTCAAATCAGATTCTCCTAGTATTGGCCGTGGAAGAGGATCCGTTGGATCAGACACCGTTTCACCTTTCGCTGCTGAACCTCCTCGCCAATCGCCGCCTCCACCGCAGCAACAA	1	-	Chr1:20028100-20028219
Chr1:20028593-20028843	AJ_ArThaHiC2091110370719	TTTGGATCATTTTCTTTGTAATGTGCTTGAATTTGGCCTAATGTCTATAACTATGGGGGATTTCGACAAATCGAAAAGTATAAATCTCTTCCCATCAGGTACTCAAACTACAGGGATGAA	3	-	Chr1:20028664-20028783
Chr1:20033876-20034037	AJ_ArThaHiC2091110370728	ACATACCAAATGAGAATCGCAATATCTTTTGCTGATTTGAGACCAAAACGATTGTTGACTCTAATGGCGGATCGAAGTCGGATCAGAGGCTTTCTTAGAGAAGAACATGTGACGTATGCT	1	+	Chr1:20033901-20034020
Chr1:20037617-20037855	AJ_ArThaHiC2091110370871	TCTGTGCTGTTTGTAACGCCCATCTTGGTCATGTCTTTGACGACGGTCCACGCCCAACCGGAAAACGATATTGCCTCAACAGGTTTATCATTCATCCTGATCTATTTATTAAATTTGCAA	1	+	Chr1:20037690-20037809
Chr1:20048810-20048981	AJ_ArThaHiC2091110370989	TACAGGAAATCTCGGCCGTGTTTTCCTCTGTCACCTCCGTGATTGCCCTAACCCTACCGGATTCGCACTTAAAGTAATCGATCGTGATGTTCTTACGGCGAAGAAGATTTCACACGTGGA	1	+	Chr1:20048835-20048954
Chr1:20049034-20049257	AJ_ArThaHiC2091110370998	CTAATAACCGGTTACCGATTTCCCCGGTTAGATTCTTCGCCGCCGAAGTACTCGTCGCCTTGGAGTATCTCCACGCCCTTGGAATCGTTTATCGAGATCTCAAACCGGAGAATATCTTGA	1	+	Chr1:20049095-20049214
Chr1:20080776-20080976	AJ_ArThaHiC2091110371129	AATTAAGGAACTCACCGAGAAGATCAACGATCTATGTGGTTTGTGCACACTGAGATAGTGGTGTTACTTTCATTAGTGACTTCTATTTACCGAATGATTAAATTGCATATACGGGTAACT	3	-	Chr1:20080821-20080940
Chr1:20080983-20081213	AJ_ArThaHiC2091110371140	TTGTGCTTATATGACTAACTAGCTTTGGGTGACTCTGCCTCACTGTTTGAATAAGTCATCCAAGTGAAAAAAAAACGTTCATAGTTATACTTGGTTTGATATGTTGCGTCTCCATATGTT	3	-	Chr1:20081022-20081141
Chr1:20081417-20081600	AJ_ArThaHiC2091110371150	CCCGGATCACTGCATATTGGGCTAATGGGCCGCGTTTCATAGCCCAATTCACACGTGGTATTATTTTCTCTGGCCTCTCCAACAAGGCACCTAACGTGGCCCTTACTTACTAGACCTTAA	1	-	Chr1:20081421-20081540
Chr1:20091447-20091685	AJ_ArThaHiC2091110371323	TCTATTCTCAATCGTATCGATTTTCACAGGGATTCTATTCCTCCTCTTGCTTCATCTCTACGCAAGACTCTTTTGGTGGCGTGTGGAACAACATTTCAACCTAAACCTAATCCAATCCGA	1	+	Chr1:20091496-20091615
Chr1:20091865-20092084	AJ_ArThaHiC2091110371334	CGTTGGTTCCGTGGAAGATACGACACATGGAGGAAGTGAGGGTTTACCTCAAAATCAAAACTTTGAATCAGGGCACTCGACTAATCAGCATAATCCATCTCAAGATCAGAGCTTTGTTCA	1	+	Chr1:20091914-20092033
Chr1:20148568-20148750	AJ_ArThaHiC2091110371396	ATTTTGTTTCTGAAAATGTTATCAACTTATCGTTGACGTGGCAGCGAAGTATGCATGGTTACCGTTGATCCCGCCAGTTCTACAACCAAGTAACGGTAACAACCATATACTTATGAGGTA	1	+	Chr1:20148617-20148736
Chr1:20235857-20236071	AJ_ArThaHiC2091110372007	TCCATGAGAAAAACCAAACATCAGAACCGCGAGGACACGCGTGTTTCTGCTAACCGCCGCGACGATTTCAACAGATCCAAGAATCTTAAAACCATAGAACCTGTTTTCTTCAAACATTCA	1	+	Chr1:20235930-20236049
Chr1:20280251-20280451	AJ_ArThaHiC2091110372087	GAAAGATCGTACAGTAGAATCAAAGAAGATGAAGATGGGAATGAAGAAGACACTGGTTTATTATAGAGGAAGGGCTCCTCATGGCCTTCGTACTAATTGGGTCATGCATGAATATCGTCT	1	-	Chr1:20280272-20280391
Chr1:20283242-20283463	AJ_ArThaHiC2091110372181	AGGCCCATATATAAGTGGGCTTGATTATTTGGGCTTTTGGAAGAGTGTGGCCCAACATAGAGATATAGAGCTGTTATCGTCTGTCTTTCATGGCGGAGCAGAGGTGATCGTTTCACTATT	1	+	Chr1:20283291-20283410
Chr1:20367061-20367254	AJ_ArThaHiC2091110372512	TTGATTCCATGCTATGGGCAATAGAATTTATAATCTCGATAGGTGTTACGAGTTGCTCTTTTGCTTTCGACCGTGAAGATCTTATCTCTATTGAAAAACTTTCAGTGTAGCCAACATTTG	3	+	Chr1:20367110-20367229
Chr1:20367687-20367856	AJ_ArThaHiC2091110372533	GGCATTGCAGCAGCAACAACAAACAGGACGTGTACCGTTAGATCTTAAAGTGAATGCACCTGTCGCCATCAAACTCGGAAATCTGAAGATGAAGAAGATTCGGATATTGGGGAGTTGTAA	1	-	Chr1:20367713-20367832
Chr1:20367856-20368085	AJ_ArThaHiC2091110372542	TCGAGATCACAGCTCGTAATCCCAACGAAAAGATTGGGATTTATTACGAGAAAGGAGGTCATATCGGTGTGTGGTACGACAAGACAAAGCTATGTGAAGGCCCTATACCGAGGTTTTATC	1	-	Chr1:20367906-20368025
Chr1:20368223-20368411	AJ_ArThaHiC2091110372551	CTAAATACAAAGTTGTAGATCCATGGGAGATCAACAAAAAATTCACCCGGTTCTTCAAATGGAAGCCAACAAGACGAAGACAACAACACCAGCTCCCGGAAAGACAGTCTTGCTTCCGGT	1	-	Chr1:20368256-20368375
Chr1:20422800-20422984	AJ_ArThaHiC2091110372882	TGAAGATGGTTACCCTGAATCCAGTTTACTCAGAAAGTGTTCAAGCATTTTATTTAACACCTTCTAGGCGTGAAATGAAAGATCTAAATCAACAGGGGTCAACTTAACTAGCATTGAGCT	3	+	Chr1:20422837-20422956
Chr1:20423223-20423444	AJ_ArThaHiC2091110372894	TGTCTTATCAAGCTTCGGAGGTCACCAAACAACCAAATCTGTTCTTTGTGTTGATTGGATCCGTACAGACGCTCCTCTTCTCTGTCTTCACTCTGATTTGTTTTCTTGCACAGGTGGTGG	1	+	Chr1:20423320-20423439
Chr1:20423444-20423673	AJ_ArThaHiC2091110372902	GTGAGTGGCCCAATAACCATTTTCCTTTGTTAAGCTGAGCGACGTCGTTTTCTTTCTTTGACTCTTTAGCTGAACTTGAGCTCTGCTTCGATCTCATTTCAGATCTTGGAGCTGTTGATG	1	+	Chr1:20423517-20423636
Chr1:20425170-20425400	AJ_ArThaHiC2091110372975	CATCGTAAAAATCAAGATATATCACCTATAAATGTTTTTAAACTACATGCAGTACTCGCTCTTCGGTTCGATTCTGACAATTGGAGCAATGATCGGCGCAGCTATGAGTGGACGAATCGC	1	+	Chr1:20425243-20425362
Chr1:20431213-20431382	AJ_ArThaHiC2091110373019	TGGTCCTCAAGAAATTGTGGCCTTAGAAGAGGAACCTAAGGGTCTAGGTAATGAGAAAGAGGGAGGGGAGATTAGTAGATCTGATCTGGAATGTGGTAGAGAGATTAATGAAGACGACAA	1	+	Chr1:20431238-20431357
Chr1:20431387-20431596	AJ_ArThaHiC2091110373030	TGCACATTTCCATGATGACCATGACACGAGAGAATGGATGTACAACAGTGGTTTTAAGATCGTGGCAAGTAGGAACCATGATGAGAACAATCATCATCATTATCATCATCGTCATCGTCA	1	+	Chr1:20431472-20431591
Chr1:20451241-20451420	AJ_ArThaHiC2091110373576	CCCAACATTTTTTCTGGGTTTATTTCATAATCAAAGCTTTTGTCTTCAATTTATTTGTTATCGAGGGCTAAAAAAACTTTGATTTATGATCGTTTCTCTTGTTTTGATGAAATGTATTTT	5	+	Chr1:20451266-20451385
Chr1:20451778-20451934	AJ_ArThaHiC2091110373596	TTCCATTGGCAAGAATCAAGAAAATCATGAAAGCTGATGAAGATGTGCGTATGATCTCGGCCGAGGCGCCTGTTGTGTTCGCCAGGGCCTGCGAGATGTTTATTCTGGAGCTTACGTTAA	1	+	Chr1:20451815-20451934
Chr1:20451934-20452118	AJ_ArThaHiC2091110373598	ATACTGAGGAGAACAAGAGAAGGACGTTGCAGAAGAATGATATCGCGGCTGCGGTGACTAGAACTGATATTTTTGATTTTCTTGTGGATATTGTTCCTCGGGAGGATCTTCGTGATGAAG	1	+	Chr1:20451947-20452066
Chr1:20481827-20481995	AJ_ArThaHiC2091110373606	TAACATAGACGAGAAAGAGCGTGAGAGCTACGAGGCTCGTGGACCGTTGGTACTTAAGAACATCCACGTGCCGCTTGATCATATACCCAAGAATGTCACTTGGAAGAGTCTTTACCCGGA	1	+	Chr1:20481852-20481971
Chr1:20535212-20535389	AJ_ArThaHiC2091110374187	TAAGGAGAAAGGTGTTATTGAGTTGGTCCATCCATGGCCGGAGTGGATGGAGTTGATGGAGAGATTGGTGAAGCAGAATTACTTTGATCATAGGAGAGAAAGAGATGATGATGATATGGT	1	+	Chr1:20535237-20535356
Chr1:20535389-20535638	AJ_ArThaHiC2091110374192	TGAGAATGTTGGAGTTGCTTTGTTTCAGGATTTTAGAGCTGTTCAAAATGCTTGTAGCAATTTTGGTAAAGACCGTTTCGATATTCTAAGGTTTGTTTCAGCTTCTGAAATCCAACAATT	3	+	Chr1:20535402-20535521
Chr1:20553421-20553585	AJ_ArThaHiC2091110374288	GGTGGAGAAATTAGCTGATGTGATCGAAAATGGAACACGAGATCAGAATTCTGACGCCCTGGTTTGTTAAAAATCAAGTCTTTTAAAGTGGTTTTGAGATTTCTAGGGTTTCTTATTGGA	3	-	Chr1:20553442-20553561
Chr1:20629882-20630067	AJ_ArThaHiC2091110374370	GGGTTAAATGTAAAACGTAAATAATATAAAGAAACCCTAATAAATAAGTCGTTCATTGATCAATCTTCTCCAATTCTTGCAGCATCACTTCTCCGTCGTTCCTCACCACCGAGATTCGTT	3	+	Chr1:20629943-20630062
Chr1:20630067-20630287	AJ_ArThaHiC2091110374376	GTATCTTCTTCTTTCTCTGTCGAATAAACTTGGCTTTTCCGACTTCGATTCCTTCAATTGTAAACAACTTCGTTGCCCGTACAACTTTTTGAGTCCGGTGAAAGATCCCGTGACGGAAAA	1	+	Chr1:20630116-20630235
Chr1:20633499-20633727	AJ_ArThaHiC2091110374452	CTGGGACTCCTCTGTTCATGGCCCTCCTCTCTATTGGTTTCCTTCTCTGTGCGTTTCATGAACTTGTTCGAAATTCTGATATTTATCTGTAAAATACAGCTGATTGTCTGTTCAATTTCT	1	+	Chr1:20633524-20633643
Chr1:20677485-20677655	AJ_ArThaHiC2091110374495	TTCAAAATGTGCAACAAGGAATGACGTGTGGGATGGAAAAGATCTTGATGGAGTGCCTGAAGAACCCGATGAGTTTATCGAACCGCCATTCCTGAAGATTGATGAGGAGACTATTCAACA	1	-	Chr1:20677512-20677631
Chr1:20677655-20677833	AJ_ArThaHiC2091110374501	TGGTCCACAGATCTTGTATCTATCTACCTCGTGTCATTAAGATCACCCGACACCCCCATCGTCTCTCTCTCACTCCCTCCCTTCAACCTGGTGATTTCTCTTGTGGAGTTTGTCGCCAAA	1	-	Chr1:20677690-20677809
Chr1:20682182-20682403	AJ_ArThaHiC2091110374555	TCAAGATCCTTTAAAAAAGGTACATTATCATTGTTCTATCTGCAAGTTCAATCTTAACCTGAGTTGCTCGATGAGACCACCACCTCCCACTATCTCACATTTGAAAAGTCATGAGCACAC	2	-	Chr1:20682224-20682343
Chr1:20682430-20682592	AJ_ArThaHiC2091110374561	CAATTTTGTTGACGATGATGTTATTGTTAATGATGGTGATGGTGTTGGTGAAGATCGTGATGGTGACAGTGATGGGGATGGTGATGGTGGTGATGATGATGATGATGATGATTTTCAACA	1	-	Chr1:20682461-20682580
Chr1:20682708-20682948	AJ_ArThaHiC2091110374570	CGGCGATCTCACGGTCCACTTTCTATCTGCTTTTCGTGCAAAGGCAAGCATTTAGAGGGTAGAAAGTACTATTACTATTGTGCTACTTGCAAGTTAGAATTCCACAGAGGCTGTCACCTC	1	-	Chr1:20682769-20682888
Chr1:20748712-20748927	AJ_ArThaHiC2091110374790	ATTTGCTCTGTTTCCTGGGAGGTTTTCTCTGTTTTTTAACCAAGATTTCAAGATTTGGTTTTGACGGAGCATAAATGGAGAGAACAAGATCGAAACCGGTTCGGAATCTACCCGAGACAA	1	+	Chr1:20748773-20748892
Chr1:20756248-20756457	AJ_ArThaHiC2091110374882	GATCGTGAACGCCGGTGATCCTTACTTCTTCCATACATGGAACGTGACTTACGGAACTGCCTCACCTCTCGGTGTTCCTCAAAAGGTGATTCTCATCAACGGTCAATTCCCTGGTCCTAA	1	-	Chr1:20756290-20756409
Chr1:20829474-20829670	AJ_ArThaHiC2091110375554	CTGTGGCGGCCTTGTGTTTCCCGGGAAAGATCAAGTCTTTGACAAAGTTTGCATATCATTCTTTCTTTTCTTTTTTCTGTTTAGTTCAATTCTTCTTGTTTCTTATCTTATTTCTTCTAC	3	-	Chr1:20829515-20829634
Chr1:20833466-20833713	AJ_ArThaHiC2091110375622	GATTCCCCAGAAAGAAAAGCAGCTTCCTTGATGGAACAAGGATCACTTTCTGCAAGTTTTCGAGAATGCTCAACTAAAACACCTAATAACAGTGTGCTCCAGAGCTTCAAGATTGTGATT	1	-	Chr1:20833570-20833689
Chr1:20833713-20833874	AJ_ArThaHiC2091110375634	TCTTATTCAGGCCCAGGTAGAAGTAAGTTTGTTCATGATCGATCATGTATTATCTTTGATTATATGGCTCTTCATTGTCAGCTTAATGGAAAGATTACAACTTTGAACAGATGGGGTTGG	3	-	Chr1:20833731-20833850
Chr1:20834026-20834275	AJ_ArThaHiC2091110375640	CTCTCTTCACCGTTTCGTTGATCCCTCCGATCATCTTTAGGTCTTCTATTTGATTCTTGGTAGTTTATATCTGGTTTTAGGGTTTTGATATTGGATGGAATTGGGTTTGTGTTTTTCAAA	3	-	Chr1:20834120-20834239
Chr1:20834284-20834435	AJ_ArThaHiC2091110375650	CATCTCCCAAATTCTTTAGTATCATCTCTCAATAAAAAAGAACAGACCATTGGGATCACAAATCTCCGAAGAAGAAGAAGAAGATATCAAAGTGTTTATTTTTGTGGGATTTCTGCTGCA	3	-	Chr1:20834304-20834423
Chr1:20855556-20855746	AJ_ArThaHiC2091110375717	TAGCAAGATATCATCACTCTTTCAGTTTGATCAAACTTGTCTCTGAGAAGAATCGAAATCAATTTCTAGTGCAATTGTGGAGCTTCCGGTGAAAGATGTGATTTTTATACTTTGTACTGA	3	-	Chr1:20855591-20855710
Chr1:20923451-20923603	AJ_ArThaHiC2091110376045	CTTGTCCATAACTTGTCAGCTCAAGGATTTTGTCTGGTTATTAAACATTCTGGATCCACTTTTCTATGTAAAGGCACGCAGCAATGTGATGAAGATGCTAAAAAGAATGTTCAAAGAGAG	3	-	Chr1:20923472-20923591
Chr1:20924194-20924416	AJ_ArThaHiC2091110376068	CTACCTCCAGGTTCAATGGGGTTTCCGGTGATCGGAGAAACCGTTGAGTTCTTCAAACCTTACAGTTTCAACGAAATCCATCCATTTGTCAAGAAAAGAATGTTCAAGTTGGTTTTCATT	1	-	Chr1:20924261-20924380
Chr1:20937448-20937623	AJ_ArThaHiC2091110376193	CAATGCGGAAGAAGCCTTGTGCCAATTAATTGCACCACTGCAACAGCTGGAGGTACACATCTTTGATCTCTCCTGATTCTTTTTCAAATTATACTGACATGCTGTTCTTTATTTTGACTC	1	-	Chr1:20937504-20937623
Chr1:20937623-20937869	AJ_ArThaHiC2091110376202	ATTGAGGAAGAACTCCTCAAGTCTTCTCGATCATTTGAGGAGTACTTCGATTTAAGAACTTTTGACGCCCGTGTACGAACTATATTGCAACAGCTTGGAACAATGCTTTCTCAGCGGCGT	1	-	Chr1:20937714-20937833
Chr1:20937927-20938091	AJ_ArThaHiC2091110376213	GCTCTCTCTTTATTGCCCTTATTATACATATGTTGTCTCATGATCTTATCTTTAATTTGCTATATTAACCATCATATATTCTTTCTCCAGTTATGCTATCGTAAGACACAAGCAGAAGCA	4	-	Chr1:20937948-20938067
Chr1:21057052-21057234	AJ_ArThaHiC2091110376453	TTACAAAAGCCTCATCTCTCAATCTACTGATCACCATCGGATTTTTTCGTCCAAAAAGGAGATTTATCGATGTTTATGTGACTCTCTTCTCATCGATAATGCTCGAAAGGTTAGATTTCT	3	-	Chr1:21057079-21057198
Chr1:21057234-21057428	AJ_ArThaHiC2091110376461	TATTAACTTTTTACTCGATCGGCAAACAAAAGGAAGAAGATGATGATGTTACCTGAAGCATGCGTAGCCAACATCCTTGCCTTCACATCTCCAGCCGATGCATTTTCGTCATCGGAAGTC	1	-	Chr1:21057261-21057380
Chr1:21057428-21057609	AJ_ArThaHiC2091110376470	CCAATGATCACTATATATTCTCACCATCTCTATCTCCAAGCATACTTCATCTATCATCGCTACAAAAAAATCAAAGCATCACTAATTCACTATATACACTCACAAAACGGAATTCTTCAA	4	-	Chr1:21057430-21057549
Chr1:21094826-21095074	AJ_ArThaHiC2091110376497	ATTCAATTATGGAAAAATCTCTAATTTGAATCAGAGATTTGGTAATTACGCTTATTCTGGGAGTAGTTTCGCTTCCAGTACTCGATCATTGAGCTCAGAAGCTGTAGCTGTGGCAGCGAC	1	+	Chr1:21094923-21095042
Chr1:21101462-21101658	AJ_ArThaHiC2091110376682	CTCAAAGGACAAGTGCAATCCCAATTCTGTTCTGAATCTTCTAAGAAGTTATGATTTCACAGATTCTCAGATATCAAGCATCATTACGACTGATCCAGAATTACTTATGGAAGATGCTGA	3	+	Chr1:21101499-21101618
Chr1:21112874-21113054	AJ_ArThaHiC2091110376815	TCTCAAACTCGAGATTGCCTAGAAAGCTCTCTATTGGTTGGATCAAACTCACAGACGTTGAGTCTTTGTTATTAAACTCTCCAACACTCAAGAGTCTAAGTATTAATTACTGTTGGGGTA	3	-	Chr1:21112911-21113030
Chr1:21113054-21113279	AJ_ArThaHiC2091110376826	GACAAGTCAAGAACCTAGTTCTTGATTTCTCGGACCCTTCTTGGATAAGCACTAGCTGTGCGTCGAGGTATGACTATGTTTGTGTGCAATTGCCTGTATGCGTTTATAGTCTAACAACCC	1	-	Chr1:21113076-21113195
Chr1:21159880-21160041	AJ_ArThaHiC2091110376954	GAAAGTATCGGCGGTTCTGTTTGATATGGACGGTGTGCTTTGTAACAGTGAAGATCTTTCTAGACGCGCCGCCGTGGATGTTTTTACGGAGATGGGAGTTGAAGTCACTGTGGACGATTT	1	+	Chr1:21159922-21160041
Chr1:21160041-21160260	AJ_ArThaHiC2091110376959	ACTTGTTTATTGGTTGATTTCGTTAATTTCATTGGTTTGGCAATTAACAGGTGAAGCCAAGTTTTTAGGAGGTGTTGCTTCAGTCAAAGAAGTTAAAGGATTTGATCCAGATGCAGCTAA	3	+	Chr1:21160090-21160209
Chr1:21167846-21168027	AJ_ArThaHiC2091110377058	CTTCCAGTTGGTGTTTGGATGAGCTATTGGAGATTTTAAAGTGCAAAGAATATATAGGACAAATAGTGATGACTGTCTTCTACGAAGTTGATCCTTCTCACGTGCGCAAACAAACCGGAG	1	+	Chr1:21167871-21167990
Chr1:21178003-21178223	AJ_ArThaHiC2091110377224	CTAATTACTGTTATATTTCGTCGTTATGAATATCAGATATTAATTAATATCTGATATTGCATTCTATTTTAGAGTAGGTTTAATTGTTGAGGGGAACCATAAATCGGTAGTGTCCATGCA	5	-	Chr1:21178020-21178139
Chr1:21178773-21178927	AJ_ArThaHiC2091110377249	TTAAGTGAACACTATTTTCCCATTCTTATCCAAGACTCAAAATCTGTGATTTTGAACCACTCAAGATCATCTCTCATGGCTTCTTCTTCTTCCTCACCTCGCAACTGGAGATACAATGTC	2	-	Chr1:21178808-21178927
Chr1:21178927-21179167	AJ_ArThaHiC2091110377254	AGTGAACTCAGCTTTGCTAGCTATTTTCTCGTCCGCATAATGGTAAAAGAATGATCCTAAACACATCTGGCCAAGAATGGACAGTATATATACAAATTGTTATGTACGCTTCATTATGAC	3	-	Chr1:21179036-21179155
Chr1:21187477-21187640	AJ_ArThaHiC2091110377530	CAAAGTCAACGAAAAGTGGCCTGGTCATGCTGTTCTCATTCCTCCGGCGTTGGATCCTCAATCCGCACACAAATTTGGTTCCCAGGTACAGAGAGAGTTTTCACCTTTTCGTATCCGAAG	1	-	Chr1:21187509-21187628
Chr1:21188109-21188306	AJ_ArThaHiC2091110377556	CAACATAAAACATGATAACTAATTCTGACCAAACACATATATAATAATGTAGGTTACCTCTTCACGTTGTTATAGTTTAAACAAAACAATAACGTAGATTGAGTATCTCTACACGTTGTC	5	-	Chr1:21188115-21188234
Chr1:21188306-21188498	AJ_ArThaHiC2091110377560	CGTTCCACAAAGAGGAGGCAAACCACTACTCCCCATCCATGATCAACGAGTGGAGCAGTTATGGGTCAAATGAAATAAGCTAAATGGCGCAAACGAAGATATTTTTGAAAGTTTTAAAAT	1	-	Chr1:21188355-21188474
Chr1:21225897-21226147	AJ_ArThaHiC2091110377570	GCATGATCTGTCGAATAATTATCGTATCGTGGGTCATGTACCTTTGTTTCACATTTATATTACTTTCGTAATTTTTTCAGGAAGGTTTATTTGGCCGGAAAAAACATCAGCGACATTTGC	3	-	Chr1:21225968-21226087
Chr1:21226909-21227086	AJ_ArThaHiC2091110377623	AATAGTCATGGACCCTCAATACAAATCCAAGCGTAGAGTCGATCACGGTATTAAATATATTTGTTGAACATTATAACTACACAATTGTATAGAAACTAATCGTGACTTTAGCTTGCATAG	4	-	Chr1:21226943-21227062
Chr1:21312327-21312514	AJ_ArThaHiC2091110377748	ATCCCCGGACTGATATATGCCATCTACGTTCTCACCAAGTAGGAATAACCAATCAAAAACACTGGATCCTTTTTTTATTTTATAACTTTTTCTTTTTCCAACAATGTTTGCTTTTTTAGA	4	-	Chr1:21312395-21312514
Chr1:21312514-21312665	AJ_ArThaHiC2091110377758	ATATGACACATTTGACATTAATGGTCAAAGTAAGATCAAATCTCTTGTTTTTTTGTTTCTTTGTATATGTGTTTGCAGTTGGAGTTTTGGGTCTGTTTGCTTCTAACGTTATTCGCTTTT	4	-	Chr1:21312515-21312634
Chr1:21358758-21358940	AJ_ArThaHiC2091110377851	TTGCAGGGCCTTTTCACAATATTTTTTCTTTTTTCTTTTGGATCCCTTTATTCAAAGGTTTTAAAAACAAAATTTCACATGGACCCTGGACTTCCGCCCCATAGAGTCGGGCCTGCCGCC	1	-	Chr1:21358797-21358916
Chr1:21359109-21359358	AJ_ArThaHiC2091110377857	GAAATGGCAAGTGGCTTTGAAGGCTGTGTGCAACAAAATTGGACTCACGTTGGATCTTAAAAGGTAAGTGAGCTCATTTTTTGTTTATTATTTCCACTTGAGCCGTAAAAGCCCTACTCA	1	-	Chr1:21359227-21359346
Chr1:21381307-21381485	AJ_ArThaHiC2091110378051	ACACAAGATCACTTGTCAACAACATTCATCACAACACAAAGACCATCACTTCCTCTCTGCCTCCGTCTCTTGTTCGGTTTCATACCTTTGTCTTCTAATTCCAAAAACCAACAATGGTTC	1	-	Chr1:21381308-21381427
Chr1:21395847-21396010	AJ_ArThaHiC2091110378148	GTTTCTCTTCCTTAAAACTCTTTTTTTATTCCATATGTCGGTTTTAGGGCTTTTGGATTGGGATGAAAATTGATCAAAGTCTTTGTCTTTGGGATTTGTCTCTTATGAATTTTAGGTGAT	4	+	Chr1:21395872-21395991
Chr1:21417191-21417391	AJ_ArThaHiC2091110378166	GCCTGAGAGACCTGTGACGGTTCGTTCTCTTTGTTCTTATGCTTTGTTGATAGATCTCTTTTGGTGAATCTGTTAAACCTGGAATCTTATTTAGGGTGTCTTCTTAAGTGGGGTGTGATT	1	-	Chr1:21417260-21417379
Chr1:21417706-21417917	AJ_ArThaHiC2091110378186	TTCTCTAGAACCTTCCTCTCTCTCCATCTCTCAAAATCTCGGAAACACCATTTTCTCACTCTCTGATCTTTTTTCCCCCAAAAATGGCGCGTGACATCCAACTCCCCTGCGACGGCGACG	1	-	Chr1:21417798-21417917
Chr1:21420517-21420721	AJ_ArThaHiC2091110378305	TTCCCATATTCTACAAGGTGAAAGTTGGTGATGTGAGACGTCAGAAGGGAGAATTTGGTCGTAACTTTTGGAATTTGGCAAGAATTTCAAGTGGTGAGGAGATCAAGCAGTGGAAGGAAG	1	+	Chr1:21420554-21420673
Chr1:21420721-21420950	AJ_ArThaHiC2091110378310	GGTCTTCTACGTGACCTTCAACTCTTTTTATATATTAATCGTGCTATGTTACTTAGGATTATTCTCTTTTAATTTTAGTTAGATTTGTTAAGAACATATAATTAATAGATAGTAAGTATA	6	+	Chr1:21420722-21420841
Chr1:21629322-21629489	AJ_ArThaHiC2091110378551	TCTTATGAATTGAAATATTGGTAACTTTTATAGTCAACTTGATCCGTTCAGTTTTAATATAAACTTTTTCAAAATTGAAGTGATTAGGAGAATTGAGAAACATTAACAGTAGTTAGATGC	5	-	Chr1:21629346-21629465
Chr1:21629489-21629680	AJ_ArThaHiC2091110378556	CCCAAGAGATCAGGTAAAAGAAGGAAAAAGTGACTCCAACGATCTTGTATCAACATGGAATTTCACAATCGAAGGGTACTTGAAGTTTCTCGTGGACAGTAAGCTTGTGTTTGAGACGCT	1	-	Chr1:21629537-21629656
Chr1:21635147-21635349	AJ_ArThaHiC2091110378686	AAACGATCTAAACACCACCAATTTGAATCAGTTATCTCTTCACCAAAAAAAAAAATGTCCGAACAAGAAGGCAAAAATGAGAAGAAAGTAACTGAAGGGCAATGGACTACCGGTTTATAC	3	-	Chr1:21635170-21635289
Chr1:21641418-21641581	AJ_ArThaHiC2091110378720	ACCAAATAGACCAACTCGAGAGCATTCGGTTAGAGACTAAACGGAGGGAGAGAGATTTGATGCGAAGGTTCGCGCTTCTACAACAGAGCGTGGGGGATCCACTTCTGATGGTTCCATTTA	1	+	Chr1:21641419-21641538
Chr1:21693578-21693779	AJ_ArThaHiC2091110378960	ACGTGATCTAAACTTGTTAAGCTCTTTTCTAAAAGATGCAGATGCAAAGAAACATACAACTGCGGTGGTGAGAAATGTTGTCGAAGAAATAAAGGAAATTGTTTACGACGCAGAAGATAT	3	-	Chr1:21693600-21693719
Chr1:21693803-21694003	AJ_ArThaHiC2091110378963	GCGTCACACGTCACACACTCTCTCTCTCTCCCGTATTTTATGAGTGTCTATATAAGATACACAAGATCAATGTGTGGAATATAAAATGACGAAATTTTGTTTTACTCTTGGTGATTATGA	3	-	Chr1:21693884-21694003
Chr1:21704173-21704421	AJ_ArThaHiC2091110379118	GTAAACCCTCACTATGAATACACATATATAAAGGAGTTCAGAGTTCAATATTGTTTGTATTATTGATCACGATGAAATGCGTACAACATCTTTTAAAATTTAATCGAATCATGAAACTCC	5	-	Chr1:21704302-21704421
Chr1:21712037-21712260	AJ_ArThaHiC2091110379204	TTTTGTTAATCTCTCGGATCATTTTTCCGGTATTTTTTGCAGGAGCTTTACAGCCTAGGTTGCCGGAAAATTTTGGTCGGAGGTTTACCGCCAATGGGATGTTTACCGATTCAAATGACT	1	-	Chr1:21712093-21712212
Chr1:21712260-21712506	AJ_ArThaHiC2091110379216	ACAATGCTTTGGTGGTTGTGAGTGCAGGGCCTAATGATTTCATCTTGAATTATTACGAGGTTCCCTCATGGCGTCGCATGTATCCTAGCATTTCTGATTACCAAGATTTTGTTCTTAGTA	1	-	Chr1:21712315-21712434
Chr1:21716200-21716437	AJ_ArThaHiC2091110379297	CCGTTTTTTTCGAAAACAACTTGTGTCACACAATGCACGAGTTCTTGAGGTTGATCATGATGGTCAACGAACACTCTTTGATTAATTTTGGGGAAATGTTAAGAATTTATTGTTCTTCTT	3	-	Chr1:21716306-21716425
Chr1:21718529-21718702	AJ_ArThaHiC2091110379449	TTGAGGTGGGAGATTTGATTTCAGCAGAAATGGATATAAATAGGGCTTTGGAGGCTGATCCTGAGAATCGGTAAAAGAAGAAATTGTGTATGTTGTTTGTTGCATCCTCATTTCTCCTGG	1	+	Chr1:21718578-21718697
Chr1:21718702-21718914	AJ_ArThaHiC2091110379455	AGGCGATGAAACTCTCTAAAGCTGAGAGCGACAGAAGAGACGCTAAGTTGTATGCAAACATGTTTGCACTATCTAAAGTAAGAACTCACTTTCCATGATCGTTTTCCGTGATTCGATTGT	1	+	Chr1:21718751-21718870
Chr1:21742868-21743097	AJ_ArThaHiC2091110379465	ATATGGATCCTTTACATTTTTCTATTGACTTAATCATATCCAAAATTGTTTATGGATGTTGTTGGACGCACCCGACCATTTATAGTCGTCCATATGGATAAACCAATTTGTAAAATTACA	4	-	Chr1:21742918-21743037
Chr1:21879692-21879896	AJ_ArThaHiC2091110379782	TTTGACAAAAGAGCCTAAAGGAGACTGTGATCGAAGCGTTGTCTGTAGTATCAGCGTTCGATTTCCAAATGGGAGAAGAAAGCAGAGAAAGTTTCTCAAGAGTGAACCGGTTCAGCTTCT	1	-	Chr1:21879741-21879860
Chr1:21879896-21880135	AJ_ArThaHiC2091110379792	CTCTGATCAACAAGACATGGTTGGTTTTACGGACGATGATTTTGACGATTTTGATGAGGCAGCTGATGAAAAGACTTAAATCTCATACATAAGGGGAATTTGTCATCAGATAGCGTCGTG	1	-	Chr1:21879956-21880075
Chr1:21880135-21880294	AJ_ArThaHiC2091110379800	CAACACTGTGCTCCTCCTATGCTGCTCCTTAGTCCTTATCGATCCGATTACTGGCCAGAATATATGTATATGGAGGGGCGAGATTAAAGCTAAGGGTTTTCTTAAGGATTTGAAGAAGTA	1	-	Chr1:21880151-21880270
Chr1:21880508-21880730	AJ_ArThaHiC2091110379804	GGAGAGTAACTATCAGAGAACACTGGTCTCAGCTTTCCTCAATATCTCTGTAGATCAAACTGTGGAAACCGCTATAAAGTGTCTAAAGTCTACAAATTGGAAGCTTGAAGATGCCATCAA	1	-	Chr1:21880599-21880718
Chr1:21902466-21902689	AJ_ArThaHiC2091110379902	TTAGTGATAATTGACTACTAGTTTCATGGTTGAGCAGGAGACTTATGGCTGAGACACTTTTGTCATTTGGAGTCGAAAAGCTTTGGGACCTCCTTGTCCGAGAATCTGATCGATTTCAAG	1	+	Chr1:21902515-21902634
Chr1:21902689-21902935	AJ_ArThaHiC2091110379916	TGAAACCTTTCTTCGAAAAAAACAACTCGGAAGAACAAGAGGCATGAAGAAACGTATCAAAGAATTTGCTTGCGTTCTTCCTGATCGCCGGAAAATTGCTATCGATATGGAAGGCCTAAG	1	+	Chr1:21902786-21902905
Chr1:21924493-21924723	AJ_ArThaHiC2091110380101	TTTGTTGTTGTACCAGGCTAGAAGAAACAATTCCTTTGGCTGAGCCGAGAGACGTGAATATATAGACGAAGATGTTCGGTTCTTCTAATAATAATCGTAAGTGATCCTTTACCTTATTGT	3	+	Chr1:21924554-21924673
Chr1:21933026-21933218	AJ_ArThaHiC2091110380378	TCAGATTTTTGGTAAAGCAGAATTAGCAGCGACTAAGCAGTTTTTGGGGTTCACTGTGATGGATTATAAGGTTTGTTCCTTGAGATTCGATCTCCAAGGAATCCGCAACGACGGTGATGA	1	+	Chr1:21933063-21933182
Chr1:21936579-21936740	AJ_ArThaHiC2091110380574	AACATCGTTGAATACATTGATGAGACGTGGAACTCATCTGCACCGTCCATTCTTCCTTCACATCCTTATGATCGTGCTCTTGCTCGCTTTTGGTCTGACTTCGTTGATAACAAGGTTTGG	1	+	Chr1:21936604-21936723
Chr1:21936740-21936942	AJ_ArThaHiC2091110380580	TTTCTTTTGATGGAATTTTTTGGAACTTTTTTATTATTATTGTTACATTCCAATGAATTTATCTTTCGTGCATGGATTATCTTGGGGATATATACTTAGATCGTCCTATTTGAGTGATTT	5	+	Chr1:21936777-21936896
Chr1:21998805-21999048	AJ_ArThaHiC2091110381288	ATCACTTAGTTTCCTTTCTAAACTTCTGGATCTGCTCAAATCCCTTCAGAAGAAATCTCACACTCGACTTCGTTGTGGCAAGAGAAGTCTCTCTTGGACCGTCTATCTTCTGGGTGGTGA	1	-	Chr1:21998893-21999012
Chr1:22005728-22005935	AJ_ArThaHiC2091110381522	AAGAGGATTTTGAAAGGCTCATGCTTCAAGATACTGCTTCTTACTATTCTAGCAAGGCATCAAGGTGGATCCAAGAGGAGTCTTGTCTTGATTACACGCTAAAGGCATATCTCTAGATAT	1	+	Chr1:22005801-22005920
Chr1:22008355-22008529	AJ_ArThaHiC2091110381547	CGTTGTGGTGGCCTGTGGGATTGAGGAAACCTAATCTTCTAAGTCTCTATATATTAAAGAGTCATCATAGCCTTCTCGTTGCACTTCCCATTACGATCGAAAGGTCTCTGCTTTTTTTCC	1	+	Chr1:22008368-22008487
Chr1:22008568-22008771	AJ_ArThaHiC2091110381552	GATGATGATGATGATTTGCGTAGGAAGAAACAGAGCTTTTTCAAACAGAGATTTCCAGGCTTTAAGAAGAAAGCCTCTGAGCTCTCTGTTCTCTGCGGCAACTCTGTCGGTTTCATCTGT	1	+	Chr1:22008569-22008688
Chr1:22008879-22009062	AJ_ArThaHiC2091110381563	GATAGAAATTCTTAAGAAGACGCTCACGGGTTCTTCCGAAAAAGATGGTGCTAGGGTTTCAGAGAACTCGGCCATCTCCGATCACAAGTTGAAGATAGAGCCTCATTTGAAGGATATATT	1	+	Chr1:22008916-22009035
Chr1:22070358-22070559	AJ_ArThaHiC2091110381633	TTGACTTTTTGGCGCTTCTTTTCACCAATGTCAGCTCTTACGTTCCCTATCGGATCCGTTCATCACTTGATGCCGGTTCTAGCTCTTGGAACTGCTGCGTCTCCTCCACCCGAACCAATA	1	-	Chr1:22070428-22070547
Chr1:22072869-22073029	AJ_ArThaHiC2091110381736	TTGACTTCTCTTTAACCAATGTCTTTAACCACAGTCCCTACGCTCGCCATCAGATCCGGACCATCCGGTCATCACTCGATGCCGGTTCTTGGTTTTGGAACCGCCGCTTCTCCGCTACCG	1	-	Chr1:22072898-22073017
Chr1:22073626-22073869	AJ_ArThaHiC2091110381827	ACATCGGAGAAAATATCAACGGCCTCTCAAAACTCAAACAATACTTTCGCCGTTTCGGTTATATCACCACCACCGGTAATTGCACTGACGATTTCGATGACGTGCTTCAATCAGCGATCA	1	+	Chr1:22073687-22073806
Chr1:22080672-22080844	AJ_ArThaHiC2091110381838	AAACAAATTAGCAAAAAATAACGAAGTGTCTCGTCTCTTCTCTCTTGTCTTCTCCAGATCAGTGTTTGTGGGGTTTTCCCAATGGAGCTTCTTCTCTCATTGTCTCTCCTCCTGGGGTTT	1	+	Chr1:22080721-22080840
Chr1:22080844-22081087	AJ_ArThaHiC2091110381845	TGGCTAGAATCCCCAGATTTTACTGTATCGACTTTGGGAATTTAACTGGAGAACCATTTCCACTCAAACTGGGAAACAAAAACCTGTTATTGAACAATGGCCACTCATTCATCGAGATCG	1	+	Chr1:22080905-22081024
Chr1:22119463-22119646	AJ_ArThaHiC2091110381914	TGATGAGAGGAGGAAGAATCATGCATGTGATCTCAATGACTTCCCTCATCATCTCAAGGGTTTGTCTCGTGAGGAGTTAAGGAAGCATCTCCTTCACCTTGACTCTCAATTACTTGGAGT	1	-	Chr1:22119491-22119610
Chr1:22119754-22120000	AJ_ArThaHiC2091110381921	ATAGCCTTCTCGTTGCACTTCCCATTACGATCGAAAGTTCTCTGCTTTTTATCTCTCTCTCACGATTTAATCAAAGTTTCATCTTCTCTCTCTCTTTCAAAAGATGGCTCCTCGTCAGAA	1	-	Chr1:22119845-22119964
Chr1:22139388-22139609	AJ_ArThaHiC2091110382112	GGAAAATAGGTAATTTTTCATTAAGAAACACAAATCTTTCAATGGTAAATATGTACTGATCATTTCATGTTGTTGGCAAGCAGATGGGATGGTCAAGGAGCTTATGATAGATCAAGAGGG	3	+	Chr1:22139485-22139604
Chr1:22160210-22160428	AJ_ArThaHiC2091110382273	AAAAGCTATATTTGGTAATCCTACTACGTTTTCACTAGCTGAGGATGGAAAGAAGATCATCGGGTTTCACGGATATTCCATGGCAAACCTAAACTCTCTTGGAGCATACTTCACTTGGAT	1	+	Chr1:22160307-22160426
Chr1:22223219-22223397	AJ_ArThaHiC2091110382310	TTGATCATCCTCAATATCTTGAGGACGAATATGAAGGATGGCTCAACCACATGATCGTGTAGGTTAACAAAAAGCGGCATTGTACTTTCTTTTTACAGATTATGTAGAAAAAGATGATGT	3	-	Chr1:22223266-22223385
Chr1:22223447-22223659	AJ_ArThaHiC2091110382322	ATTAGATAGAAGAGGCCCTGTTAACCAAAAGGGTCTTCAGTTCTACAAGAATCTTATCCAAGAATTAGTAAACCATGGTAAGACCTCTCGTCATATCCACTCGATATTCTGCGCGGTGTT	1	-	Chr1:22223456-22223575
Chr1:22272360-22272528	AJ_ArThaHiC2091110382906	AAATTCAGATTTTTGAACAAAGTTCAAGATCTATGCATATGATCTAAATTCTAATAGAAACAAATATATGATGTATTGGTGATGGGTTCGCTAGAATTTCTGAAATGACTTTTTAAGTGA	5	-	Chr1:22272385-22272504
Chr1:22273013-22273184	AJ_ArThaHiC2091110382939	TTCCTTTGGCGCAAAATGACCCCTGAAACTCATGTGGACATGATCAATGCATCCGAGAAGGCTCCTAAGGAGAGAGCCTACGTGACGTTTTTGGCAGGAAATGGAGACTACGTGAAGGGA	1	-	Chr1:22273041-22273160
Chr1:22371533-22371744	AJ_ArThaHiC2091110383034	CTGCTCAAGCCGAGCGATTCTTCACTAAGCTCATCGAGAAAGAGGTTGTTCTGATCTTCCTCTTATCGCTAATTGGTCTTTGTTTATTGCTTGGTTACTGTAGAATTTTCAGAGAAACAT	1	-	Chr1:22371613-22371732
Chr1:22371744-22371904	AJ_ArThaHiC2091110383044	TTCATCAGATCTCGCTGATTAATCATCCCCATTTGGATCTGATCGAAACTCTTAGGGAAGAACATGGCAGGAGCTGCCTCCGCGCTGTTTCTGCTTGATATCAAGGGACGCGTTCTCGTC	1	-	Chr1:22371761-22371880
Chr1:22372072-22372255	AJ_ArThaHiC2091110383053	TGATCCAATGGGCCTTTCTTCTTCAATGATGACTTTCTTCATTGACTCTCCTTCTACTTTCGATGGTATTAAATTTGACGGAAAAAGTAAAACGATACCGTCTGGGTGAAAGGCAGAGCT	1	-	Chr1:22372072-22372191
Chr1:22409747-22409909	AJ_ArThaHiC2091110383242	TCTCGAATCCGAACAGCAACAAGAACTCGAAGAAGCTGAAGAATCTCTCCGTGAAGCTGAACTTGAACTTGATCGGTAACATTTTCGTCTTTTCTTGTATGGAATTTTCATAGATCTGGA	1	+	Chr1:22409772-22409891
Chr1:22409961-22410159	AJ_ArThaHiC2091110383251	AATTTAATGGAGAAAGCGGCGACAGTTGCCGCGAAACGACATATTGCGGCGGCGATGGGATCAGCCGCCGCGTCTATGAGATCAGCTTGGAAGACTGCAGCTGGAAATAAGGTTCATCCA	1	+	Chr1:22410034-22410153
Chr1:22438242-22438431	AJ_ArThaHiC2091110383409	CGTTGTGGTGTATTGTAATTGTCATAGCGATCATGATTACAGCTCAAAATCGGCACAATTGTATCTTCCAGCTGGTACAGTATGCAATTTCTGCAGTTTATGTTACAATTTCATCAGATT	3	-	Chr1:22438276-22438395
Chr1:22452447-22452637	AJ_ArThaHiC2091110383513	ATCTTTTAGTCTCTACCTAAAATGGAATGCATCATAAAGCTCCCTCAAAGATTCAACAAAAACAAATCCAAAAAGAACCCTTTGAGGATCTTCGATTCAACGGTTCTAAATCATCAACCA	3	+	Chr1:22452484-22452603
Chr1:22455288-22455499	AJ_ArThaHiC2091110383564	TCCCAAGCCTAACCATTGCGGAGAAAAGGCCGTGGTGTCCAACAAGAAAACAAATATTTGATGGTTCATGCAATAGAACTGATTACACACAATGCTTTAACGACTTAAGAAATACATGGG	1	+	Chr1:22455301-22455420
Chr1:22488973-22489194	AJ_ArThaHiC2091110383818	ATATATTTTTGGGTATGATCCAATAGACAAACAGTCGAAGGTATTGCGTATAACCTCGTCGTCGTGTCGCTTACCCAAATTCGGTAAGTATCATGTTCTCACATTCGAGTCTGGAAACAA	1	-	Chr1:22489027-22489146
Chr1:22489329-22489498	AJ_ArThaHiC2091110383826	ACAACATGTTGTTCCCGATCATGTCTCCAGCCCCACCGCGGATCCTTTTCACCATCGAAAATGCAGAAGGGTTGTTCTTCTACACTTCACCTCAGCCTCGAAACCCTGATGAGAACACGT	1	-	Chr1:22489355-22489474
Chr1:22490571-22490805	AJ_ArThaHiC2091110383830	GTGGCGAGCCGATGTTTATGCTGTGGAAGAGCATTGACACCAAGTGGTTCAAGATCTTGGGCAATTTTTCTCTTCATCACCACCTGGTAACATCCTCTTTTATTCCTTCACAATCTATGT	1	-	Chr1:22490674-22490793
Chr1:22496224-22496393	AJ_ArThaHiC2091110384024	TCTTCTTCACCTAAACCTTCTTCGTCACCTATACCGATTAGATCATCTAAGTCAATATTATCCGGGAGTTACTTAACATCATCAAGACGTGTTTCATCGCCTATAGGCAACCTCAAGAAT	2	-	Chr1:22496250-22496369
Chr1:22499659-22499863	AJ_ArThaHiC2091110384144	AATAAATCCATTTTTTGTTGGTGTGATTGTAGATGAGACCAGAAACTCGCGAGATCATTGAGATGCAGCTGCTCCCGGCTATGAAGTTGGTTAAGGAAAGGCTCGAGAGGGAAGTAGAGA	1	-	Chr1:22499732-22499851
Chr1:22502082-22502266	AJ_ArThaHiC2091110384165	TCGCCCAGATGTTTCCTTCTTACGTACTTAAGATTGTGAAAAGTTTCTTTCAGATCTCTAAAGCCGTAACCGATGAAGAGTCAAGAGAGGCGTATCTCACGGATGCTGAAGAATGTGCTA	1	-	Chr1:22502135-22502254
Chr1:22502707-22502875	AJ_ArThaHiC2091110384172	TCCTATACATTTCCGTACTTTTTTCTTTCAATCAAAGGTACGTTTGTTATTTGATCTTTATAAAAACAGAGAAAATATTAAACACATCCCTCGTTCCATCTTTCTTATACATTTGTTCTT	5	-	Chr1:22502744-22502863
Chr1:22502875-22503045	AJ_ArThaHiC2091110384179	AGCTACTTTTTTAGTGGATCACAGGTCTGATCTTTTTTGTTTCTTGCGTAATGGGTTTTGATGTTTTGGCTATAAAAACAGAGCCAAAGCAAAGGTCTAAATACATTCTCTACTCTTTCT	3	-	Chr1:22502890-22503009
Chr1:22648878-22649116	AJ_ArThaHiC2091110384523	GCAGCAATGGGAGCCTGATCTTGCTTGATGGGAAACAAGATGTTATTTGGTCAACAGGAAAAGCTTTCACATCCAACAAATGTCATGCGGAGCTCTTAGATACCGGAAATTTTGTTGTAA	1	-	Chr1:22648949-22649068
Chr1:22683685-22683872	AJ_ArThaHiC2091110384818	GGTGTTGACTTCTTGGAAAAGTCACACTGATCCATCGCCTGGCGATTTTACGGTTCAGATTACACCGCAAGTTCCATCCCAGGCGTGTACTATGAGAGGCTCAAAGACTTATTGGAGAAG	1	-	Chr1:22683717-22683836
Chr1:22689528-22689740	AJ_ArThaHiC2091110385035	GGATGACGCAATCTGTGATCCTTGGGCGTTAAGAAACCATTTGTGATGGAAATTGTGGAATTGAAGTGTGTTAAAATTGTTCTCTTAAAGAGTTCATTTTTCAGTGTTAATGACTTCACC	3	-	Chr1:22689573-22689692
Chr1:22693496-22693663	AJ_ArThaHiC2091110385099	AATGGTGGGAATTGAATTAATTGGCCATACTATCTGTCTCGATCGTGATTTTAGGCCCGGCGACATTAGCAAGTCTTTAACATGTGTCTCTTCGAACGTTTAGATTACGCACTGTATGTG	1	-	Chr1:22693520-22693639
Chr1:22717105-22717285	AJ_ArThaHiC2091110385326	AGAAGAAAGAAGCAAATCCTTACCAGAGAGGATGCGAGAAGATCAATCGTTGCCGTGGTGGATAGGTGGAAAACAGTGAATTAACCAACCCACCCAAGAGCATAAAATATACATCAATAC	1	-	Chr1:22717142-22717261
Chr1:22748143-22748318	AJ_ArThaHiC2091110385509	TCTCGTCTTTAGTGTTTTCTGCGGTCAAGGGTGTTGTTCTGATCGGGAGAGCTCTTTATTTAGCAATTTTGTTTTCTCCAAATGTTATTATGGCGTTGTTGGGATTTGCTTGCGGGCCTC	1	-	Chr1:22748175-22748294
Chr1:22748871-22749091	AJ_ArThaHiC2091110385551	CGTTTAACGGTTTAAAGATCATTCCAAAAACTCAACCTTTTGCGTGTCTCCTCTCGCCATGACCCTAATCTCAAGGTTCGTCTCTAATCTCATATTCAGGGTCTCTCGTGAATCTCTAAT	1	-	Chr1:22748924-22749043
Chr1:22786858-22787059	AJ_ArThaHiC2091110385696	GCAATAATAATTAGACATGAAACTAATTTTTGCTTTGAGACGAGAACGAAGTTAGAAAGAGACAAGCCCTAAAGATCGCTTTGAGACGATAAACTCTTAAAGTTTCGATTCGTTCACGAT	3	+	Chr1:22786919-22787038
Chr1:22787777-22787964	AJ_ArThaHiC2091110385727	AAAATCTGAATTTTGGTTTTGGAATACGCAGGGATGCTCTTGACGCGCTTGGATTAGTCCGTTACTGCTGCAGGCGTATGCTTATGACTCATGTCGATCTAATCGAAAAGCTTCTAAACT	1	+	Chr1:22787802-22787921
Chr1:22791725-22791894	AJ_ArThaHiC2091110385835	ACTTATAGCCGGAAACTCTCTCCTCTCCGATCCTCCGAGTAGCTTATCTCTCTCGATGTCTTTCATCACCGGTAAACACGAATTTACCATTTTATCCCATTCTGTTTCACGATAAATAAT	1	-	Chr1:22791739-22791858
Chr1:22805741-22805909	AJ_ArThaHiC2091110385886	CTTCCTCAGGTACTCCAGCCGTAAGATTTTCTCGATTCTTGATCAAGGTCCATTTGTTACATGGACATCTTACGATACCACGTTGTACCAGTTTTATTTCATTAACACCGTGGAATATCG	1	-	Chr1:22805766-22805885
Chr1:22898528-22898741	AJ_ArThaHiC2091110386393	TGTAGGGATCAGTTGAGATCTCATAGTTACTATTGTTTCCTTGTTAGGGTTCTTGAAAAGTCAGCATTGCTTGAAGTGTGGTAGAGCTATGTCGTCTCGAAAGAGATTCGATGTGAGATT	1	-	Chr1:22898574-22898693
Chr1:22999821-23000032	AJ_ArThaHiC2091110386745	CACAGTAAAATCAAAATTCACCTGACTGTGAGAATCAACTGATCAATTCCATTCCACTGACTGATTCTTCCAAATCTCAGGAGTCAGGCCTCAGAGGCTAATTTGGTTTACAATAGACAC	1	-	Chr1:22999889-23000008
Chr1:23013323-23013479	AJ_ArThaHiC2091110386872	CAGAATCTGGTGCTTAAACACTCTGGTGAGTTCTAGTACTTCTGCTATGATCGATCTCATTACCATTTCTTAAATTTCTCTCCCTAAATATTCCGAGTTCTTGATTTTTGATAACTTCAG	3	-	Chr1:23013348-23013467
Chr1:23019209-23019420	AJ_ArThaHiC2091110386907	GGCTTAGAATCCCGGTGTATTATGGGTCGGGTCGTAACCGGGCAATGACGCAGGATCTGACGTAAAACTCCCAAGAATTTTTTTAAAAAGTCTCCGGAAAATAAAATCAAAGTTCATTAA	1	-	Chr1:23019289-23019408
Chr1:23082588-23082809	AJ_ArThaHiC2091110387046	ATAATCTTGAGACAGAAGTCGAAGATGTCGATTGGGAAAGCACTTTCTACGTTCGTCACCTCCCTCAATCCAATCTCAATGACATTTCAGATGTGTCTGATGAATACAGGTACATAATGT	1	+	Chr1:23082601-23082720
Chr1:23160107-23160297	AJ_ArThaHiC2091110387405	TTCGATGACGAGTCAAGAGACGCGAGACGTTATCCAAATCATAGGGAAGTTCTTGCGTATATTCAAGACTTTGCTAGAGAGTTTAAAATAGAGGAGATGATCCGGTTCGAGACCGAGGTG	1	+	Chr1:23160132-23160251
Chr1:23160393-23160600	AJ_ArThaHiC2091110387412	CCTTTTCTTTTAATAACAGTGTAAAAGTTAGTTGAGAATAACCAAAAAATGTGTATCCATAGGTATAAAATCGTGGCCAGGAAAGCAGATTCATAGCCACAACTATAGAGTTCCTGATCC	3	+	Chr1:23160418-23160537
Chr1:23169250-23169500	AJ_ArThaHiC2091110387511	ACAAGTCTCTCCGAACCAATCTCCCTAGAGAATGTATGGGTTACAAGGATTTCCCTTTCGTGCCACGTGGCGATGATCCGTCAAGAGACTCTAGAAGGTATCCGAGTCACAGGGAAGTTC	1	+	Chr1:23169359-23169478
Chr1:23169685-23169922	AJ_ArThaHiC2091110387520	TTTGTGTGTGTATATGTGGTTTTGACATGTGAATAATTGTATAGGAATTGAGTCATGGCCGGGGAGGCAAACACACAGCCACAGTTATCGAGTTCCTGATCCATTCAAAGATGAGGTATT	1	+	Chr1:23169758-23169877
Chr1:23186736-23186898	AJ_ArThaHiC2091110387631	TCAATGCTTGGAAGAGAATGTGGCATTTGATTTGTTCCAAAAGAAGGTTGGACAAAAAACACTTGGAAGCGATCCGGGGATCCCCCAACTTGCAAGAATAGTTGCGAAAAAATGTTGTGG	1	+	Chr1:23186761-23186880
Chr1:23218566-23218717	AJ_ArThaHiC2091110387658	TTTTTTTTGAGGTATAGACCCTAACTTCCTTTGAAGATTCTACTCCATCTTTGATCCTCTTCTGTATCTCTATGTTTTTGGATATATTTACTATTTTTATTTTCTTGATAATTGTTGATT	5	-	Chr1:23218586-23218705
Chr1:23218717-23218881	AJ_ArThaHiC2091110387665	GTGCATATCGTGAAGTATTCGATCTTTCCAAGTACAAGGGAAAGATTCAATAGAACCTAGCTAGTCACATACAATAACTCAATTCCGGAGCTTTTTGAAGGGGTTGAGTTGAATCAGCCT	1	-	Chr1:23218718-23218837
Chr1:23257182-23257373	AJ_ArThaHiC2091110387972	TCTTGTCAAGCGTCCTTCCTGCTCCCGAAGATCCTGTTCTCAGTGTATACTCTAAAGGCTTTTCATCGATTTCACTTATATCTTTCTTGTTGATTTCTTATATACTTCTTTTGATAAACA	3	-	Chr1:23257218-23257337
Chr1:23333706-23333930	AJ_ArThaHiC2091110388274	TTCCTCTTCCTTCCCTCTCATCTAGAGGGTTCGACTTCTACTACTACTACTCAAGAAGCTCTCAATGAATCCTCAAGGCTTCTTGATCTCATTCTAAGAGATTACACTCTCAACTTCTTC	1	+	Chr1:23333779-23333898
Chr1:23333930-23334171	AJ_ArThaHiC2091110388285	CGGAGCAAAAATCGAAGAATTCAATATTGGCGTTGGAGCTATTCTTGAGCCGTGTGGTGAACGTCTTTTGGTTGTGAGACAAAGCTTGGGATCAAAGTGGTCCGATATATATTACAAAAA	1	+	Chr1:23334015-23334134
Chr1:23334335-23334515	AJ_ArThaHiC2091110388292	TGATGGAAAAGTAACGCTTGCCGCCGAAGTGAAGCCGTTTGTGTGCGCCGTTAAAACCAATGGACATTTTGGTTTAGTGGTGACGGATGATCCAAAATCGAATGGTGGAGGAGAAAAGGA	1	+	Chr1:23334360-23334479
Chr1:23337423-23337635	AJ_ArThaHiC2091110388353	CAGAATAGACAGTTGAAAGGTGAGATAGCGACACATCCGATGTATGAGCAATTATTAGCCGCACACGTGGCGTGTTTAAGAGTAGCTACTCCAATAGATCAACTTCCGATCATTGAAGCT	1	+	Chr1:23337472-23337591
Chr1:23380105-23380297	AJ_ArThaHiC2091110388741	GTTTATATATGTCTATTTGATATAAAAAACTATAAGAGACTATAAATTTTTGGATCTAACTAAAACGTTCTTTTTTTTTTTACTTCTTGTTTTGGGAATTCGCGATGAGAACAGGCGATG	5	+	Chr1:23380178-23380297
Chr1:23386186-23386411	AJ_ArThaHiC2091110388984	ATATGGATGATGCATTCGACCTATTCAACAAAATGGAAACTAAAGGTATTAAACCTGATGTTTTTACCTACAACCCCCTCATTAGCTGCCTCTGTAACTACGGAAGATGGAGTGATGCCT	1	-	Chr1:23386187-23386306
Chr1:23386659-23386890	AJ_ArThaHiC2091110388994	TTCACATAATCTTTACACATACAGTATTTTCATCAACTATTTCTGCCGACGCTCTCAACTCTCACTTGCTTTAGCAATTCTTGGCAAGATGATGAAACTTGGCTATGGGCCCAGCATTGT	1	-	Chr1:23386663-23386782
Chr1:23386890-23387069	AJ_ArThaHiC2091110388997	CGGCACACTGTGTTACTTAAAGGTAATCCTCGAACTACTCTTTGTTGGGAACGATCTTTTGCTGGTGCGAGTTCTGATGATTGCAGAGAGAACTTGAGTAGAAAAGTGTTACAGGATTTG	1	-	Chr1:23386938-23387057
Chr1:23387156-23387386	AJ_ArThaHiC2091110389007	GTTTGATCATAGTGCTCTCGATGTTTTTTTTTCCCCTGAAAGTCAATCTCCGGTTTATCTATAAAAGAGAAAAAAGTTATGACCGGTTTAAGAAAACCAGCTGTAACCGAATCGACATTG	3	-	Chr1:23387207-23387326
Chr1:23389777-23390002	AJ_ArThaHiC2091110389022	CATGTGGATGATGCACTCAATCTGTTCACTGAAATGGATAACAAAGGTATTAGACCAGATGTTTTTACCTACAGCTCCCTCATAAGTTGCCTTTGTAATTACGGAAGATGGAGTGATGCT	1	-	Chr1:23389779-23389898
Chr1:23390250-23390481	AJ_ArThaHiC2091110389030	GGGAGAAGATGGAGATTTTAGGAGTTTCACATAATCTCTATACTTACAATATTATGATTAACTGTTTATGCCGCCGCTCTCAACTCTCATTTGCTTTAGCAATTCTTGGCAAGATGATGA	3	-	Chr1:23390278-23390397
Chr1:23390574-23390755	AJ_ArThaHiC2091110389039	AAAAGATCCAGAGAAGTATCACAATTGGAAAGAAGATGAGTTTGGCGAAGAGATTTGTTCACCTGAGGAAAGCTTCTCCATCGTTTTGCCTTCGAGGTATCTATTTCTCTGGTTTGAGTT	1	-	Chr1:23390576-23390695
Chr1:23497219-23497375	AJ_ArThaHiC2091110389281	TATGGCTTAATAGAGTTGAGACTATCGAAAGCAGAGTCAATGATCTTCTTAATGCTAGAAATGCTGAACTTCAAAGGCTGTGCCTTTGTGGGTTTTGCTCTAAGAGTTTAACGACGAGCT	1	-	Chr1:23497232-23497351
Chr1:23497375-23497600	AJ_ArThaHiC2091110389288	TTTCTCGATACCCTTTGATCCGTGTGTAAATAAAGTCTCTCAATGGCTAGACATGAAAGTAAGTTATACTCACAACCTCGAGAAGAATCTTGTGGCTCTCGAGACAACCATGGAAGAGCT	1	-	Chr1:23497433-23497552
Chr1:23501178-23501340	AJ_ArThaHiC2091110389353	GTTTTTAGATGACATATGGGAAAAGGTGGATTTAGCTGAGATCGGAGTTCCGGATCCAAGAACCAAAAAAGGACGTAAATTGGCATTTACGACTCGGTCCCAAGAGGTATGTGCACGCAT	1	-	Chr1:23501209-23501328
Chr1:23502283-23502484	AJ_ArThaHiC2091110389420	AGTTTTTTACAAATGTAAGAGGAAAATTAATTTAACGTCAGGTCATTCGGCCACTAAGCCAATGGAGACTTAGTAAATAGTGTGGCCCAGCAGAGGTCAATAGCCGCCACGATTTACCAA	1	-	Chr1:23502293-23502412
Chr1:23528106-23528272	AJ_ArThaHiC2091110389558	TGTACAAAGAGCACATGTGGCTTTAGCAATTGAAGAAGCTGAGATTCATTATGATCCTAGACTCTCGAGCTATGATAGACTATTGGAGGAGATAGAAAATGCTGGTTTTGAAGCTGTGCT	1	+	Chr1:23528152-23528271
Chr1:23528272-23528460	AJ_ArThaHiC2091110389562	GAAGATTGATGGTGAGCTTACTGATGAATCCATGAAGGTTATTGAAAGGTCGCTTGAAGCACTTCCTGGTGTTCAAAGTGTTGAGATCAGCCATGGAACTGATAAGATATCTGTATTGTA	1	+	Chr1:23528309-23528428
Chr1:23531518-23531699	AJ_ArThaHiC2091110389621	TTCACGTATTCCTCGACATCAACCAAGAATCTACCGTATTATTTATCTCTTAGTGCGACATGCTCAATCCCGAGTCCGTATTGCCGCAGGATCAATAATGTTCCTTATTACGTTAATGGT	1	+	Chr1:23531543-23531662
Chr1:23531960-23532197	AJ_ArThaHiC2091110389631	TACTATATGTCAACTTTGTGTTTTATAGATTCCTTTTTTTTCCGGATTGGTTGCATAACCCCTACTTTGAATTATAAATTTAAGTTGACCAAAAAAGGCCAGCTAGATAGATCTTGTGTT	4	+	Chr1:23532021-23532140
Chr1:23615108-23615294	AJ_ArThaHiC2091110389923	AGTGGTACCAATCTCAGTTTACGGCGATTTAGATGTCGAAATCACCGGGATTCAACATGATTCGCGCGGTGTGAGCGCCGGAGATCTCTTCGTGTGTTGTTTAGGAAGTGAAAATTTCTT	1	+	Chr1:23615145-23615264
Chr1:23705636-23705792	AJ_ArThaHiC2091110390325	AAAAGGCTATCAAAGAATCGAGGATCTCGATCGTGATTCTCTCCAAGAAATATGCATCGTCAAGCTGGTGTTTGGACGAATTGGTGGATATCTTAAAGCGCAAAAAAGCTATGAAACAGA	1	-	Chr1:23705637-23705756
Chr1:23711766-23712006	AJ_ArThaHiC2091110390496	ACTTCAACATCTGATTTTCACTTATCTTCTTCTATTCTTATTACCCTATTTCCATCTCTCTTAGAATGTCTCTCATGGATTCTCCTTCCTCTATTTCCTCTTGCAACTACAGATTCAATG	3	-	Chr1:23711779-23711898
Chr1:23717137-23717313	AJ_ArThaHiC2091110390694	ACAGTCACTAGGGTTAATCAGCTCAAGGAGTTAGGTAATCTTCTTCTCCCCTGATTGCTTCATCTACTCTCAGGATGAAGTTTTGATCATGTTTTCTGATTGTTCTGTATGTGTAGCTCA	1	+	Chr1:23717162-23717281
Chr1:23717313-23717560	AJ_ArThaHiC2091110390700	TCGGCTCTGAGACACCTATCAAATGCGAGCATAGTGGCATACGCGGTGTTATTGTTGAAGAAACGGTATGTTGTAGACTGATGATTAGCGCATGGAACTTAGTTTGTTTTCTGGTTTAAT	1	+	Chr1:23717338-23717457
Chr1:23770031-23770260	AJ_ArThaHiC2091110390840	TATAATCTATGCTACGTGTATATACTTCCGATATCCTTCAACCAACTCTTTGAATTCCGACTTTGGATCTATGAAACCGTTCTCAAAGAACGATCGGCGACGGTGGTCATTTGATTCAGT	1	+	Chr1:23770128-23770247
Chr1:23770527-23770772	AJ_ArThaHiC2091110390845	TCTCAGGAGTTGAAACGATTCTCATGGTCTCGTTCTTTCTCAGGTAACTTAACCACTACTAGTACCGCCGCTAATCAAAGCGGCGGTGCTGGTGGTGGTTTGGTGAACTCGGCTTTAGAA	1	+	Chr1:23770552-23770671
Chr1:23792282-23792530	AJ_ArThaHiC2091110390946	CACATTGATGTTGTCACTTACGGAACAATTGTTAATGGCATGTGTAAGATGGGTGACACTAAGTCTGCCTTGAATCTGCTTAGTAAGATGGAAGAAACCCACATCAAACCCGATGTTGTG	1	+	Chr1:23792343-23792462
Chr1:23792549-23792755	AJ_ArThaHiC2091110390957	TAGCTTTGGTAGATGGAGTGATGCCCAAAGATTGTTGCGTGATATGATTGAAAGGGAAATCAATCCTGATGTTTTAACTTTTAATGCATTGATCAGTGCATCAGTCAAAGAAGGGAAGTT	3	+	Chr1:23792598-23792717
Chr1:23795118-23795324	AJ_ArThaHiC2091110390966	AACAGCTCCAATTCTCAACCCTGGCGAGTGGTTCTACTTTGGGAAACGCAATCGAAAGTATAGTAACTTGGAAGGTGTTCATTGCGAGGGATCGTGGATACTCGAAGACGGTTGCATCGC	1	+	Chr1:23795167-23795286
Chr1:23834376-23834624	AJ_ArThaHiC2091110391026	ATGATAAGTGGATAATGCGTCGAAATTGTTGGTCTTAATAGAGTTAGAGGATTGTTGTCGGAGATTCTCAAACTGTTCATGCATTCTTCTGCTAGAGAAGTCTCAGGACATTGCTATGGC	1	+	Chr1:23834401-23834520
Chr1:23845125-23845310	AJ_ArThaHiC2091110391128	TGGAGACTATGCTTGAGATTACAACCAAACATCCTTATATTAAAGACATTGACCTGTATTTGGAAGTGGAATCGACATCCGTTGGAGTTATTGATCCTGCTACTTGTTCATCGCCTTCAG	1	+	Chr1:23845150-23845269
Chr1:23845310-23845517	AJ_ArThaHiC2091110391137	CGTGGTACACTTGGTTGATAGCAGCACTTTGAATAAAGATTCCATTTCTGGTCATGTTTCAAAACCGTGTATGTCTAGTTTGTGGCTTGACGATCATGACTTGCGAGTAGGATTGTGCTT	1	+	Chr1:23845359-23845478
Chr1:23847986-23848183	AJ_ArThaHiC2091110391250	TTTGGAAGCTCAACCAACTTCTGATGCTGTCGTTGTTCCTGTTACTTGTTCATCGCCACTGGAAAGTCCTGATAGTTCCTCAAAAAGACAGAGGATCACACAACAAGAAATAGTGGATAA	1	+	Chr1:23848023-23848142
Chr1:23891459-23891687	AJ_ArThaHiC2091110391500	GAAGTTCCACCTTCAGAACAGAGCAATCTCCACTCCTCATCCTCCTCTGTTTTCCTCAACGTACGATCATCATCAAACTTCCGAGCTAATGCTCCAAGCGGCGGCCGGGTCTCCAGCCGC	1	-	Chr1:23891568-23891687
Chr1:23891687-23891910	AJ_ArThaHiC2091110391511	TTCAGAACAATTTCAGTCCTAAAATCTCAGAAATCAGAGCATCTCTGTCTCAGATCATATTAGCAGGAGGACCAAACACACTCGACTCAATCTTCTCACTTCTCACTCCCTCCTCCGTAG	1	-	Chr1:23891779-23891898
Chr1:23933819-23934058	AJ_ArThaHiC2091110391642	CCAGAGTAGGAGTTTCTGTGATTGATTAAGCAAATTTAGGATTGATTGTTTGTTTTCACAGGTGGAAGTGACAATGATCGATGGAGTTGGTCAAGGCCTGATGTTGAAGTGTACACGATG	1	+	Chr1:23933916-23934035
Chr1:24007263-24007451	AJ_ArThaHiC2091110391971	TCTTGCCAAAATAAAAAATAAAAAAGGAGTTTGTTGTGAAGCCAATGAACGAGATCGTGACAAACACATGCCTAAAACAACAGTCGAATCCTCCTTCTCCTGCTACTCCTGTGGAAAGGA	1	+	Chr1:24007332-24007451
Chr1:24007708-24007896	AJ_ArThaHiC2091110391988	ACCCTAAGATTGGTGAAGCAGCCGCTACTAAAGTTCAAGACTTGACGTTTTCTCAAGGGTTTGGGAACGCCCACGAGGTTAAAGATCTCAACTTGGCGTTTTCTCAAGGGTTTGGGATCG	1	+	Chr1:24007745-24007864
Chr1:24020463-24020626	AJ_ArThaHiC2091110392039	CTCTTATAATATATCTACGTCTGCCTTTCCATTGATTGTCATTTCTCTTGGTCCAAAGTTATCGCAAGAAGCACCGCAAAGTTGATCCCAAGGCCATCATGAACTGGGCAAGGCAGATTC	1	+	Chr1:24020476-24020595
Chr1:24033624-24033800	AJ_ArThaHiC2091110392202	CTATAGCGGCATTTTGGATCATCACCGGACCAATCGACATCACATGTTCCTTAGTATTGATTCCTGTTTTGAAGTTAAAAAAGATATTACGGTATGTGCTGGATATGCGTGGTCTAGTGT	1	-	Chr1:24033633-24033752
Chr1:24044913-24045095	AJ_ArThaHiC2091110392315	GAACGAGGCTCAGCGAGCATACCCTCGAATCCTTGGCCATGAGGCAGCAGGGTAAGTGGTATAAATCTGGTATATATGGATCTCATTTTTCATCCCTCAATATAATTGAATGATGAATTA	1	+	Chr1:24044950-24045069
Chr1:24062335-24062528	AJ_ArThaHiC2091110392434	CACCGCAACCACCACATGCTCTGCCGTAGATCTATCTGCCCTCCTATCCTCTTCTTCTAACTCAACATCTTCCCTCGCCGCGGCAACCTTTTTATGTTCCCAAATTTCAAACATCTCCAA	1	-	Chr1:24062373-24062492
Chr1:24121447-24121695	AJ_ArThaHiC2091110392666	TTGCCCTAAGTTCACTAAATTGATTTTGCGAAAGAGATGGGAAGAGTTCTTCCAGATGAGGAGAGAGCAGCAGGATGTCTTGCTTCGGCTGATTTATGCTCGGAGAAAGATCGTTGAAGA	1	+	Chr1:24121520-24121639
Chr1:24121718-24121890	AJ_ArThaHiC2091110392674	CTGAACGAAGATGAGATTGTGAGTTTGTGCTCTGAGTTTCTAATTGCTGGGAGTGATACAACGGCCACTGTGCTGCAATGGATCATGGCGAACCTCGTGAAGAATCAAGAAATCCAGGAG	1	+	Chr1:24121743-24121862
Chr1:24171451-24171676	AJ_ArThaHiC2091110392712	CAAAACGACCCTCCGTTCCTCTTCTAACAGCCATTCCCTCTACCTACCCCAATTTCTTCTCCTTGATCTCCCTCTCCCCACACATTTATTTCTTCACTTTTGTCGTATTTTTATTTTATA	1	-	Chr1:24171557-24171676
Chr1:24213648-24213833	AJ_ArThaHiC2091110392956	AGAAATCAGAGACCAAAAGTTCAACGAGAAATTCTCACTAGATCTCTTAGTAACCATGGAACCTGAGATGGTGCGACTACCCATTCATGAGCACTGGCTGACACCTGCAAGAGATAATCG	1	-	Chr1:24213690-24213809
Chr1:24213833-24213988	AJ_ArThaHiC2091110392961	TGCTTCGTTGATGTTGGCACGTTATCAAAATCAAATGATGAATAGTTTAGTGATTACCATGTCAGATCTAAACTTTCTTTTACTAATATAATAAAAAAACATATAATTAACCATTAAATG	6	-	Chr1:24213869-24213988
Chr1:24222023-24222216	AJ_ArThaHiC2091110392996	TGTTGTATTGGGCTGGTTTGAATGTTGAGATCAAACGGAACTTTATGAAAGTAAGCACTGCGGAACTTACGAGTTATGTTGAGGGGTTATATGGTAGTGAAGGACGAGATGCGTTGGAGC	1	-	Chr1:24222061-24222180
Chr1:24278028-24278266	AJ_ArThaHiC2091110393137	TGTAACAATACAACGTGGAGGGTCTTGCAACAACGACAATACCTGTCACGATACATGTCCGGGTTGCCGTATCACACAATGTATTTTCAGGCAATGTGTTTGTACTCGTTGTAACACTCC	1	+	Chr1:24278077-24278196
Chr1:24285961-24286150	AJ_ArThaHiC2091110393353	ACTCTAAAACTTTCTCTATATAAATGGTATCTAAACCCTAGATCTAATAGTAAGTGCCGAAGAAATCTCTCAAGTCTCTCTCGTTGTCTCAGGTTGGTCAGTTCTTTCTCTAGATTTCAA	3	-	Chr1:24286007-24286126
Chr1:24292399-24292615	AJ_ArThaHiC2091110393577	GTTTCTAAGAAATAAGCTCTCTGATTATGTCGGGAGCATCTTCTGTTTCTTCTATTTGTTCCTCTAATGTATCATTGATCCCTACGGGACCTCAAGTGTTCATCAATTTCCGGGGGAAAG	1	+	Chr1:24292472-24292591
Chr1:24292711-24292871	AJ_ArThaHiC2091110393582	TCTTTTCTGAAGGATACTGCGAGTCACATTGGTGTATGGACGAGCTGGTGAAAATCAAGGAATACATGGATCAAAACAGACTCATAATCATTCCAATATTCTACAGGCTTGATCTCGATG	1	+	Chr1:24292736-24292855
Chr1:24359429-24359617	AJ_ArThaHiC2091110394265	CTGATTTTCACTCTTTCCTCTCAAGTTAAAGTCGTCGAGGCTACAAGTCGCAAACTTGGTAAGTACTTATCCTTAGACGCTTATAATTTAATCACCTCGCAATCATCGGATCGCATAAGC	1	+	Chr1:24359442-24359561
Chr1:24359752-24360000	AJ_ArThaHiC2091110394277	GAATCTTTGGCTGATTTGAAACAAACAAATTGTATGGTTTTTGTATGAATTAGCGTGTACTCAAATTATGAACTATGCAACTCCATATAACCTATTTCCGATTGTGTAGATCGTCAAAAT	4	+	Chr1:24359825-24359944
Chr1:24360950-24361180	AJ_ArThaHiC2091110394283	AGAGAGGTTCTTATCCATACGATTGGTGAATATGAGAGTGGTTCAAGTGTGGTGCGTAGCACTGGATCTAAACTTTAGAACATGTTTGTACTTCTTGGGCTACTTGTCAGTTCTTTTCAA	1	-	Chr1:24361061-24361180
Chr1:24423043-24423276	AJ_ArThaHiC2091110394747	ATCTTTGTATATTTAAACGTTACAGATTTTAATTGAATGCCTTGCAAAGAAAGTTACCGGCGACATGGAACCAGAGGCGGCGAAAGAACTCGCACTCTGTTGGAGATGTTTTCCGAGTGG	1	-	Chr1:24423085-24423204
Chr1:24423821-24424055	AJ_ArThaHiC2091110394783	GAGAGATCACAAGTATAAGGAGAGTACTACTCCCTCTAATCATGCACCCCTAAACCATAAACCACTTACATCTTCGAAATAGTTGAAATTGAAGAAAGAAATAAGTTGATATGGTAGAAG	3	-	Chr1:24423876-24423995
Chr1:24429861-24430045	AJ_ArThaHiC2091110395187	CATGCTCGAGGAGACCAATAACGGTGACGATAACCGACGAATGCCCTGGTGGTCCTTGTGCCTCTGAACCAGCCCACTTTGATCTTAGCGGCAAAGCCATGGGTGCCTTAGCCAGACCTG	1	+	Chr1:24429898-24430017
Chr1:24452532-24452703	AJ_ArThaHiC2091110395530	ATACCAAAGAAGTGCTCTTGTCAAAGTGAAGGAAGGAGATGATCATCATCATGGAATTCTCGGAATCGGTAGGGATGGAACAATCAACTACTGGAATGGAAATGTCTTGAACGGATTCAA	1	-	Chr1:24452560-24452679
Chr1:24466848-24467033	AJ_ArThaHiC2091110396037	TACTTTACCTTTCAATGATCAATGGTTCTCGTAAAAATAGTTCCTTTTGCTTCTCTGTTATAGCCAAAAGTGTAAAGTTCGTACCTTTGAGGGTTCACTTGTTTAATGGGTTTTGTTGCG	3	-	Chr1:24466866-24466985
Chr1:24473532-24473706	AJ_ArThaHiC2091110396303	TTCGATTTCCCGACAGATACTTTACTATCGGATATGAAAATGGGATGGGATAACAAAAGCGGAGGATTCAACAGAATCTTGAGATCTTGGAAAACCACAGATGATCCGTCAAGCGGAGAT	1	+	Chr1:24473557-24473676
Chr1:24495267-24495488	AJ_ArThaHiC2091110396404	GAGACAAGCTCTGGCAAAAATGGGAACAACCACTGGTTACGATTCTCGCAACTGGTTCGTCCTTCTGAACATACGGGCTTAATCCTTTTTAACACAACAAATTATATATGTGTATCTACA	1	+	Chr1:24495292-24495411
Chr1:24495560-24495762	AJ_ArThaHiC2091110396415	GGTTTAATTGGGATGAGAGCTCATATGAAAGTAATGGAACCGATGTTATGCCTACACTCCGATGAAGTGAGGATGATTGGAATTTGGGGTCCTTCTGGGATCGGGAAAACTACCATTGCT	1	+	Chr1:24495597-24495716
Chr1:24513678-24513914	AJ_ArThaHiC2091110396473	CACATCGGGTACCACAGCCGACCCAAAAGGTGTTGTGATTAGCCACCGAGGAGCATATTTAAGCACATTAAGCGCGATTATTGGTTGGGAAATGGGGACATGCCCTGTCTACCTTTGGAC	1	-	Chr1:24513711-24513830
Chr1:24517515-24517723	AJ_ArThaHiC2091110396598	CAAAAAAAAAAAATGGATTTAGTTTTGATTATATGCAGTTACTTGGATTACTCGGAAGCTTGAAGGGAATAACATCGGATGAGGTAGTTTCACCGTGTCTTCTGAAACTGTGTGAGGCAG	3	-	Chr1:24517520-24517639
Chr1:24568548-24568784	AJ_ArThaHiC2091110396718	GAAATACCCCCTCTCTGTCAAATTTTCTAAACAAGAAAAATCGTTAAAGGGTTTAAAAGAGACGGATCTTCTTCCCATAGCTCATCCATATTACCAGTAAGCTTTCTTCCTTATAGTTAT	3	-	Chr1:24568665-24568784
Chr1:24568881-24569125	AJ_ArThaHiC2091110396730	TCTAACAAAAATTATTGCGAGTTCTAGATGTTTTACTGTATTAATACTTGGAGATCATTGTTATTAACAGAGTGGGACCATTAAAAATTTGAGGCCCATACGAATTATTAAGTATTCCGT	4	-	Chr1:24568994-24569113
Chr1:24572839-24573072	AJ_ArThaHiC2091110396775	ATCTGATCAAAACGTTTAATTGTATTGACGCAATGGTTTGATTGGTTGCAGGGGATGACCCATTTATGATTACGGCATGCTCTGAGAACAAGCATGTTAAGTTTGTAGAAGATGGGTCAG	1	-	Chr1:24572893-24573012
Chr1:24577725-24577909	AJ_ArThaHiC2091110397025	GGTGTTTGTAGATGTATAGAAGCTTAAGTGTGTTTACATATCTTACTTTGAATTTAGGAAATGGATGCGCTTAGGAATGAGATCGATGCACTAAAGCCGAAAGTGAAAAACACAATCATG	3	+	Chr1:24577762-24577881
Chr1:24586202-24586420	AJ_ArThaHiC2091110397187	CGATTCAGGCTGATGTGACTTTGACCGAAGCTGAGAAAGCCAAAAAGAGGCAGAGACTGATGAGTGGTGGTGGTGACGATGGTGTCGATGATGAAGAAAAGAAGAAGTTAGAAATCTTTT	1	-	Chr1:24586229-24586348
Chr1:24606494-24606739	AJ_ArThaHiC2091110397449	GGTGCAGGTAGGCATTGATCTTGCGATAGGGACCAAATTTTTTATTCTTTTCAAAATAACATGAGAAAAATGCACATGGTTTTACAGCCAAGGGACCTAAACTAGTCAAATTTATATGGC	3	-	Chr1:24606572-24606691
Chr1:24671289-24671455	AJ_ArThaHiC2091110398326	TGACCGTAGGTCTTATGGAAATGACGGATGGGATATATGACTATCCTTCACTAGGTGAGTCTATGTCCCCTAGAGATCATGTAGGCCATGGGACACACGTGGCTGCAATTGCTGCTGGTT	1	+	Chr1:24671314-24671433
Chr1:24671455-24671620	AJ_ArThaHiC2091110398331	TAGAGGCGCGGCTCCTCATGCACGTATAGCTATGTACAAGGTATGTTGGAGGGAAGTTGGATGTATAACAGCTGATCTACTCAAAGCAATTGATCATAGTATACGCGATGGTGTTGATGT	1	+	Chr1:24671480-24671599
Chr1:24683100-24683277	AJ_ArThaHiC2091110398336	ACCAATTAGAGTGAAAAAGTCAAAATTGAAAAGAAAAAATGATCAAATATTGGATGTTATCAAGACTTTCGAAGAAGGGAATAAACAACTCATGGAGCAATTAAAGAAGACAAGTGCACA	4	-	Chr1:24683134-24683253
Chr1:24683333-24683511	AJ_ArThaHiC2091110398344	ATCTGGTTGGAAATTTGATCATGTATGGAACATTATTAGAAACTTTGAAAAGTTTAAAGATGGTGCTACTCAAGCTAAAAAAGTCTTAAATCTATGCGGATTAGAAAATCCTACCCTCGA	4	-	Chr1:24683344-24683463
Chr1:24698778-24698946	AJ_ArThaHiC2091110398417	TAGACATCTATTACAAGGCACAAGGATCACATAATAAAATTGGAACTGATCTTGAGCCACAAAGGATCATATACACTTTCTTTTAAAGAACCCTACTTGGAGAACCTACCATGGAAAGAT	3	-	Chr1:24698827-24698946
Chr1:24714562-24714772	AJ_ArThaHiC2091110398729	GACGAAGACGGAGAGAGACGTGTTCGTACCAAACGATCATGTTCTCCTGAATCTTCTGACAACGGATCTGGTGATGAAGTTGATTGGATAAGTGATTTGCCAGAAGCTTTGATTGTTCTT	1	-	Chr1:24714653-24714772
Chr1:24727543-24727725	AJ_ArThaHiC2091110399067	TTGTGTGGGGAAAAAGTTTAATCCGAATGATCTGTCAAAGAGAAAAATGATTCTTCATTTTCTTGTCGCCATCTCTCGTGTCAAAAATATGACCATCGCTGCATCTACTCTTGAGGTAAC	3	-	Chr1:24727570-24727689
Chr1:24728274-24728460	AJ_ArThaHiC2091110399087	TCAAGTTCTCCTCAACATTCCAACAAAAGATCTGGTTAAGACTAGCGTCGTATCCCCCGAATGGAGACATCTTTGGAGGTGTGTTCCTGGATTAGATTTGGATGAAGCTGATTTCACACA	1	-	Chr1:24728305-24728424
Chr1:24752152-24752352	AJ_ArThaHiC2091110399303	TATAAACAGATGGTGTACGATAGGGACAGGTTCTCAAGGGATGATAAGATGGGAGATGCGATTTTTCACATTGATCCGTTCCTTGAAGCCATCAGAATCCAAAACCAACTAGGAGGACTA	1	+	Chr1:24752213-24752332
Chr1:24754123-24754296	AJ_ArThaHiC2091110399371	TTACTTCTCATCCTACTTCATCGGCCCAAAAAATCGATGTTTTAAAGCCTCGGCCTCGATCCTTCTCCGATAAAAATAGTTGCAACGATGTCAATATCTTGCCAAAAGTTGACGTTGTTC	1	+	Chr1:24754172-24754291
Chr1:24778231-24778451	AJ_ArThaHiC2091110399424	CTCTCACAATCATAAAATAAAAAACAAAAAGTAGCTTCTCCAAGACGCGGTTCCCAATATCTGCGTTTCCCGTTTGCGTTTTCCGGCAATGGCTCTCCAAGCCACTACTACTACGTTCTG	1	+	Chr1:24778244-24778363
Chr1:24781949-24782196	AJ_ArThaHiC2091110399484	TCATCATTATTCAAAATCTCTAGTAAAAAAAAAATGGATTCGGAGTCGGAGCTCATATCGATCATTTCTCAAATCTTAGCTCTCACTAGATCTCACGTTGAGGAGGAGGAGGAGGCTGAG	1	+	Chr1:24782070-24782189
Chr1:24791291-24791523	AJ_ArThaHiC2091110399879	GTTAGATCTTTGAATTGTATTTGAGGAAGATGTGTTGAAATTGGTTAGGGAGGGTTTTGGGAAGAGGAGCTTGTAGCTATGTTTTTAAGGGAAGAATCGGGATTTGGCGTAAAGCCGTGG	1	-	Chr1:24791344-24791463
Chr1:24795731-24795909	AJ_ArThaHiC2091110399982	CTAGAAACGAGTCTCTTTCGCCTAAATCCGCTGGAAACAAACGTTCTCACACGGTAATTACAAACAACAAAGTCTTGGTGAATATTTTTCATATAAGATGTCAATGAAAGATCGTTGATA	3	+	Chr1:24795732-24795851
Chr1:24828551-24828768	AJ_ArThaHiC20911103100556	TCTCGATTCTTTCTCACTTGCTCTGTCTTTTATGGATTCTCCTAATCATCCACCATACCATGAATCCTCTTCTCATAACATGGCAAGTCATATGTCCCGGAGATCATCTAAGCAGTAAGT	1	+	Chr1:24828600-24828719
Chr1:24902273-24902506	AJ_ArThaHiC20911103101187	TTGGACTTTCAGGTTCATTGGAAACACTATGTGGTCAAGCATATGGAGCAAAACAATATCACAAGCTTGGATCTTACACTTTCACTTCAATAGTTTTCCTTTTGATTATCTCTGTTCCGA	3	+	Chr1:24902370-24902489
Chr1:24906507-24906659	AJ_ArThaHiC20911103101328	TTTGTTATCGGTAGTTGGTTTTCTAAACGCAGGTGTTTGGACAATTTATGGCTTTGTGCCTTTTGATCCATTCCTGGCTATACCAAATGGGATTGGGTGTGTTTTTGGACTAGTACAGTT	1	-	Chr1:24906540-24906659
Chr1:24906659-24906842	AJ_ArThaHiC20911103101335	TTTGGTCTTAACTCTCGAACACACTACCGATCAACGGACGATAAGCGTTGGGATTGTATCTTGCGTTTTCAACGCTATGATGTATGCTTCTCCATTGTCTGTCATGAAAATGGTAATAAA	1	-	Chr1:24906687-24906806
Chr1:24909750-24909930	AJ_ArThaHiC20911103101402	CGGCTCAATGCTATGTCTTCTCTTGGTCTGTTTCCCAATCTCACTTTTGTGGGTTTTTATGGACAAACTCTTGGAGCTTTTCCATCAAGATCCTCTTATCTCTCAATTAGCTTGTAGATA	1	+	Chr1:24909775-24909894
Chr1:24925539-24925729	AJ_ArThaHiC20911103101498	TTATTCTTTCTACTCTCCAAGGCATGGTATGGATATTCAAAAACTTTGGCTGAGGAAACAGCGTGGCGGTTTGCTAAAGAAAACGGGATCGATTTGGTTGTAATGAATCCAGGAAACGTG	1	+	Chr1:24925576-24925695
Chr1:24938335-24938528	AJ_ArThaHiC20911103101597	CGGGAGCACTGAAGAGTGTAATTTTAGTGGTACCGGTCAAGTCGTTACTTTTGATCCAAGTTATGGTGGTTGTGTGTATACGTAGAATACATGGTTTAATGTATGATTTTGTGATTACAA	3	-	Chr1:24938397-24938516
Chr1:24942260-24942455	AJ_ArThaHiC20911103101877	TTTCAAAGATTTAATTATGTTGTATTGTTTTGCTTTAGGTGAGTACCATCTTGATCTTATAGTCGAGAACGGTGCTGTACCGGTGATTGTCCCACGAGTGGCTGGTGTTCACAAGTTACT	1	+	Chr1:24942336-24942455
Chr1:24946989-24947196	AJ_ArThaHiC20911103102008	AGACATCAGTAACGTCCAAAAAAAAAAGTTTTGATTAGATTAATGTTGCACAACAACTTTAGAGGTTATCTATTACATGGAAAAAACGTTTGATCTATAGTGTACGAGAGAAAAAACCAA	5	+	Chr1:24947038-24947157
Chr1:24963636-24963872	AJ_ArThaHiC20911103102157	TTGTGATCCATATATCTTGTGTTTTATCAGCCGATGGGAATCACATACTCTGCAGTCCCTCGTTTACTTGTGGTAATCAGAGAGGTCTCTTGTACCCTTTCTGGATTGCTGGCAGAAAAG	1	-	Chr1:24963693-24963812
Chr1:24970417-24970578	AJ_ArThaHiC20911103102349	AGAGGAGAAAGAGATGAATCTGACCCATTTGGAAAGTGCTCTAAGAAAAGGTTTTGAAGTGAAGCTGGTGATCGATGAGATACCGTGTCAAGAATGTTCATCCAGTCGTGGAATCTGTGG	1	+	Chr1:24970442-24970561
Chr1:24970578-24970776	AJ_ArThaHiC20911103102355	TTACTTGCGTACCACAACATCAACCTAGCGGTAAGTTTCTCACCTAATCCTATTGAGTGGCCTCCAAGGAAACAAAACAAGAGTATAACAAAATGATCAAGCTATCTCTGTTGTTGACGA	1	+	Chr1:24970615-24970734
Chr1:24970836-24971072	AJ_ArThaHiC20911103102365	CTGACTTCAAGCTTGACTGTAGCGGAGGATTCGCAGAGCTTAACATAGCCTCCGTGAATTTCAGAATCTTAAATATGAGTTATGACTCTTCTAACAAAAGACTTGCCAGATCAGACTATC	1	+	Chr1:24970897-24971016
Chr1:25012443-25012634	AJ_ArThaHiC20911103102615	AGACGCATAGAGATGCCTGTATTTGATGGATCGGGAGTGTATGAATGGTTCTCGAAGGTAGAACGTTTTTTTCGTGTAGGGAGGTATCAGGATTCAGATAAGTTGGATTTGGTAGCGTTG	1	-	Chr1:25012479-25012598
Chr1:25048539-25048763	AJ_ArThaHiC20911103102821	TGGTTTAATATATTAGGATCTTGATTTATATAAACATGTTCAAAATGTTATCTGAGTGGTTTGTAACATGTGGTTTGTATAGCACGGATTTGTGTACCGTGAGCACGGTAACTCACCCGG	3	-	Chr1:25048596-25048715
Chr1:25122351-25122591	AJ_ArThaHiC20911103103143	TCTTCGGTATCTCTTTGATTTTTTTTTAACTATTATTGATGTTGAAAATATAAAGCTCATAAGCAATTGGAGATGGGATCTCAAGACCCTTGTATATACAGAGTGCCAAGCCAGTTGCGT	3	+	Chr1:25122448-25122567
Chr1:25168955-25169136	AJ_ArThaHiC20911103103341	CATCTCCGGGCCATATGGTATCAGCAGTTCCTGAATCTCTGATCGATTACATGGCGTTTAAGTCAAATAATGTTGTGAATCAACAAGGCTTTGAGTTTCCTGAGGTGTCAAAGGAAATCA	1	-	Chr1:25168993-25169112
Chr1:25264857-25265012	AJ_ArThaHiC20911103103717	GGTAAGGAGGATGAAGAAATTGTATTTTAGATCACTTTGTTGGTTTAGGGATTGATTAGAATCATAAACTTGTTTACAGGAATTGGAAACTTGGAAGATAAGGTTGCGTGGATGGAACTA	3	-	Chr1:25264858-25264977
Chr1:25340831-25341006	AJ_ArThaHiC20911103104146	GGATAATGAGTACGTGTTTTGTGTTAAGAGTGAATTTGAAGACTAAGATGATAAGAGTGATCATTGTTTTCTTATATTCTTTGTGTTCAATCACAGGCCAAGCAAAAGCAGAAAGGAGCT	3	+	Chr1:25340880-25340999
Chr1:25406309-25406559	AJ_ArThaHiC20911103104414	TGTTCGATCCCATGGTTACTTGACCTTACCACGAGACCGGTTGGGCTAATGAGAGTAAAAGAAAAATAGGCATATTGGGCCATAAGCCAAAGGCCCACGTAGTGCATATTATTCTTAGCT	1	-	Chr1:25406380-25406499
Chr1:25426960-25427162	AJ_ArThaHiC20911103104543	TGTTGATGAGTATGCAGAAACGGACCATGACTCTAGTTGCTACTGACGTGGCGCATCAAAGAGGACAAAGACCACCGCACCAACATGATCTCTTATTTAAATACGTTAATGGAAGTTACA	1	+	Chr1:25427009-25427128
Chr1:25442193-25442387	AJ_ArThaHiC20911103104579	AAAACAGAGGAAGTTTCTTAACGTTGTTGATCCAGCCACTAATGTCTAATCCTCTGTCTTTTAACTATAGGTCAAAACGCGTGGTATCACGCGTAAGGTACTAGACCAACACATGATTGT	1	-	Chr1:25442232-25442351
Chr1:25442387-25442582	AJ_ArThaHiC20911103104587	GGTCTCAGAGCTCACCATGTTGACAACAGATCTTACCATGTTCTTTACTAGAGACACTGAAACAACTGTGTTCATTACTAGCATTGGCATCACTCCTTCAGACGCTGTCGGGTAATGAGA	1	+	Chr1:25442424-25442543
Chr1:25442644-25442873	AJ_ArThaHiC20911103104605	GATGGATCTGCAGAGAGGACAAGTTGTGTGGTTATTACCAAACCATTTATCCAAACAAGCTGAGTGAAAGTAATGCTTGCAGGACACTAACTCACTCACCTCTTCCTCCTCTTTAAACCC	1	+	Chr1:25442705-25442824
Chr1:25464276-25464510	AJ_ArThaHiC20911103104876	CAAATAAAATCACAAATCTCTTCTTCTTTCACACGTAGAGTTGACATCACGACAGGAACCTATCATGCAATCCCCAAAACACCCTTGGTCTAACCACGTTTATATCCATAATGCCATTGG	1	+	Chr1:25464289-25464408
Chr1:25521176-25521381	AJ_ArThaHiC20911103104936	TTCAACCGTCGCTCTTCTTAGCTCACTCAGAGATGTCGTTCTCGCTGAGAAAGCTACTGGTTCCGATTCTGGTTTTGGTACTGTTTCTGGATCTGTGCGTTGAATCCGGATTCTCTCAGT	1	+	Chr1:25521225-25521344
Chr1:25611310-25611465	AJ_ArThaHiC20911103105032	CGATTTTTGTTTTGGCTCAAGTTGTTCTGTTCAAGAAGTGTCTCCGGCTGATGAACTCTTCTCCGAAGGCAAGATTCTTCCCGTACAGATCAAGAAAGAAGAATCTTTACCCCAGACAGT	1	+	Chr1:25611311-25611430
Chr1:25611515-25611714	AJ_ArThaHiC20911103105039	GAATCTGATTTCGAAGACAAGCCAAGAGGATTGTTCTTACAGTTCAAGAGAAGCATAAGTCTTAACTACGACAAAAGCCGAAACAGCAAAGGGCTGATCAGATCGTTTCATTTCCTCTCA	1	+	Chr1:25611552-25611671
Chr1:25622047-25622260	AJ_ArThaHiC20911103105247	GGCGAGTTTCCGGCAGGATCTTCCGGAAGAAGTGGCGGTGGTGTACGAAGCCGAGGCGGAGGAGGAGGAGGAGGAGAACGTAAGTATGAGTGTCAGTATTGTTGTAGAGAGTTTGGTAAC	1	-	Chr1:25622093-25622212
Chr1:25669558-25669728	AJ_ArThaHiC20911103105570	TCATAAACTCCGATAAAATCCAAGTCTACGAAGGATTAGAGATCACAACGAATCAGATTACGTTACAAGACCGTCGCGGCGTTCCTCACCATCTCCTCGGCGTCATCAACCCCGAACACG	1	-	Chr1:25669585-25669704
Chr1:25669796-25670006	AJ_ArThaHiC20911103105581	GACAACATCACCGTCGTTCTCGTCACATTCTTCTTCTTCTTCTTCTCTTCTCTCTTTCACCAAACGAAGACGAAAACACCAACCTTTAGTATCATCCATACGCATGGAACAGTCACGGTC	1	-	Chr1:25669803-25669922
Chr1:25707367-25707529	AJ_ArThaHiC20911103105972	GGTTGATTACATTACCTTCATTGTGTTTTGTAGCAATATTTAGGTCACTTCTGTACGAGGCTTGTGGTCGGATCGTGAACCCTGTAGATGGTTCGGTTGGTTTGATGTGGTCAGGGAACT	1	+	Chr1:25707392-25707511
Chr1:25707713-25707956	AJ_ArThaHiC20911103105981	AGTTCTAGTGCTACGCATGGTTATGGCCACTTCACGTTGGAGAATGTGGAGAGCCGAAGGGAAGCTCCATTTAATCAAAGTTCTCCAAATCTTGGGTTTGATGATCAAGTCGATATCAAC	1	+	Chr1:25707786-25707905
Chr1:25709828-25710061	AJ_ArThaHiC20911103105992	GCATGATCAAGATGAAGGTGATGAGACATCCCCATTTGAAATAAGCTTTGACTACGAGTACACACACAAGACCACATTCGATGAAGGAGAAGAAGATGAGAAAGAAGACGTGATGAAGAA	1	-	Chr1:25709882-25710001
Chr1:25714043-25714213	AJ_ArThaHiC20911103106144	TAGAAGCGAGGCTCAGATGGTTATCTTCGAGGCCATGGACGATCTTTTCAAGAAAACCGGTCTTAAACCTAAAGACGTCGACATCCTTATCGTCAACTGCTCTCTTTTCTCTCCCACACC	1	-	Chr1:25714070-25714189
Chr1:25714213-25714382	AJ_ArThaHiC20911103106152	TGGAACACTCTCGTTTGATCCTCAAGGACAAGCCTAAGAGCGTCGAGTTCCAAATGAGAATCCTTGAACGTTCTGGCCTCGGTGAGGAGACTTGTCTCCCTCCGGCTATTCATTATATTC	1	-	Chr1:25714215-25714334
Chr1:25714382-25714574	AJ_ArThaHiC20911103106157	TTGAGCTTCTTCGGATGGGTCCTGAAGAGATCCTTAATGTTTGGAATTCACTCCAGTTTGACCTAGTTCAGGTTCTATGTTCTTCCTTCTTTGTCATCTTCATCTCCACTGTTTACTTCA	1	-	Chr1:25714419-25714538
Chr1:25747318-25747511	AJ_ArThaHiC20911103106278	CAGCACCAAAAGCAACAACACATGGTCGGATCCCACCCGACCCGAGAGCTCCAAGAAGAAGAGCTACGTAAAGTATACTCAATTGTGCTGTGTCAGCTACTACACAAACCTCTTCTCCTT	1	+	Chr1:25747355-25747474
Chr1:25752658-25752856	AJ_ArThaHiC20911103106357	AAAATCCTCTCTTTCTGCGATTTCTATCACTTCACGCGCATTGAGAGCGAGAGAGAGAGAGACCCAAGCAAGAGCTCAAATTAGGGTTATTTTTCCGATTTGAGAGATCCATTAACAATG	1	+	Chr1:25752683-25752802
Chr1:25752982-25753179	AJ_ArThaHiC20911103106366	GTTGCGCTTTGGCTCGATTCTATTGTTTCTGGTAATTTTTCTTAATCTATCTTTCGAATTCTTCTCTACCCTTTTCTAAATTTTGAATTTTAGATCTGGGTTCGTATCAATTTCTGAAAT	4	+	Chr1:25753019-25753138
Chr1:25753179-25753335	AJ_ArThaHiC20911103106372	TTTGATTTTATGGGTGTTTAGTATCATCATGTGCGTTTATCTAAATAAATTGGAAATATTGTTTCTTTGTGTTAGAGATCTTAACTGGTTCCGTTGCACCTTTTGCAGCTAAACCTATTA	4	+	Chr1:25753192-25753311
Chr1:25760102-25760284	AJ_ArThaHiC20911103106500	GCTTCAAGATGCTAGTAAATTCGCAGTTTGGGCGATTCTCACCGTCGTTCTCATTTTCGAGTATTACGTCGGTATTGATTCTTAACTCATAGCCTAGTTTATGATCCTTTGATTGGATCT	1	+	Chr1:25760115-25760234
Chr1:25827909-25828143	AJ_ArThaHiC20911103106614	CTTTGATCACTGCAATTATTCATTCCTTCACCTTGTTCATTGATACAATGACGGACACAACAGACGATATCGCAGAGGAAATCTCATTCCAAAGCTTCGAAGATGACTGCAAATTGCTCG	1	-	Chr1:25827964-25828083
Chr1:25829293-25829454	AJ_ArThaHiC20911103106697	AGATGAAGCTTTTGACTGTTACAAACAATGTCTTCAAAGAAGCACCAACGCCATCACACTACGTCTCTGTTTCGATACGTGCGGTGTTGGTGGATCCAAGTCAAGAACCGAAGAATATGG	1	+	Chr1:25829294-25829413
Chr1:25884837-25885005	AJ_ArThaHiC20911103107310	TGACGTCATCAAGAAAGAAATGGAATGCATAGTGAAGGAAGATCCTAGAAATGCAGCCATAATTATTCGTCTTCACTTCCACGACTGCTTTGTCCAAGTAAGTACACATCCACACCTTTC	1	-	Chr1:25884862-25884981
Chr1:26000593-26000764	AJ_ArThaHiC20911103107504	GAGTTCACCAGGTGGGAAAATCGCCAGCTTCTTGAACTCCTTGTTCCATCAAGCAGGTTCGAAGAAAAACAAATCAAAGTCAAAGTCAAAGACAAAGCCAACAGATCCAGAAGTGGAAGA	1	+	Chr1:26000594-26000713
Chr1:26057605-26057761	AJ_ArThaHiC20911103107583	ATATCCTCTCTGACTTCGGTTGGAACCTCCACCACTCCTCCGATCATCCTCACAGTCTCAGATTCGACTCCGATTTAACACAAACCACCGGAGTCAAACCTACCACCGTCACTTCTTCTT	1	-	Chr1:26057618-26057737
Chr1:26057916-26058088	AJ_ArThaHiC20911103107587	AAAAGAATCTCTCGTATAGACAAAGAGAGAGAGAGTCTGAGATCGGTCCTTGACGAGACACTGCACTTTAACGGGTTTCAAAGTTTTTTTTTCACTCTCTTTTCTTTCTTTCTTTCTTTC	3	-	Chr1:26057945-26058064
Chr1:26058088-26058322	AJ_ArThaHiC20911103107599	TCTCACTTTCTCCGCTACTAGCAGCCTCCCGTTCCGTTTCACTTGACCCTTTTGACGTTGACGTTCCATTTTTTCAACTTTCTCTTCTTTTTTTTCCCTCTCTCTCTTGAATTATTATTA	1	-	Chr1:26058107-26058226
Chr1:26146796-26146966	AJ_ArThaHiC20911103107772	TGTTGTGCTTCTCATGTTTTCTCCCATGGGAAAGGCTTCAATTTGCATAGGCAAACACAGGTCTGATCACACTTTTTTTTTAATACCAAAGTATCTTTCACATTGTTCTGTTTAGTTTGA	3	-	Chr1:26146847-26146966
Chr1:26147547-26147730	AJ_ArThaHiC20911103107816	ATCAGATCTAAGTGCCACATTCCTAGGAAACGAAACCCGATGAGCTTGACACGTGAAACGTCGGTTAGTAGCTTCTAGTAACTGATTTACTTTGGTGGTTAGCCCAAATGAGTGGTCCAA	1	-	Chr1:26147551-26147670
Chr1:26153393-26153586	AJ_ArThaHiC20911103107901	AGCCCATTGAGCCCATAACGTATTAATCTGATCTATATACATTATATTTTTTTCTCAATTCCTTGTCGACCACACAAAAGTAAACATCCGTGAAGCTTGCTATTGACTTACTGTAGCGTT	3	-	Chr1:26153431-26153550
Chr1:26162458-26162646	AJ_ArThaHiC20911103107972	TCTAGGACATGGAATAAGCTTGTCCGGTTTCTTGAGAGCCGTTGATTTCTCTCCTGATGTAGTACTTGTGGTAGTTGTTGTTGTGATCTCGCTCTGTTGATCACAGTTGTTCTTGGAACT	1	+	Chr1:26162495-26162614
Chr1:26162744-26162919	AJ_ArThaHiC20911103107978	AAGTTTCTTGGCTGAGGGAATCTACAAATGGGTCGATCTCGATCTGAATTTTTAACCCTAAAATTTGAGACTTTCTCTCTCTGTTATGAGTTATAAAGGCTAAAAAAATTAATGTTTGCT	4	-	Chr1:26162776-26162895
Chr1:26162925-26163112	AJ_ArThaHiC20911103107985	GTTGTCCCCTGTTCACGATGTTTCTTCTGATCCAAGCAAGGAGGATTCGTCTTCTTCTTCATCTTCTTGTTCTCCAACTATTGGACCAATCAGGGTATGTCATGAGAATCTTAACCTCTT	1	-	Chr1:26162957-26163076
Chr1:26163151-26163302	AJ_ArThaHiC20911103107990	ATACCAACCTCAAGCCCCTTGTTTTCTCTTCATGCTCTTTTTTTCTTCCCTCCGATCTTCATAGAGAAAAAAAAACCAGAGGAAACCATTTATTAGACCTTCATATCTCTAGAACTTTCA	3	-	Chr1:26163171-26163290
Chr1:26163302-26163481	AJ_ArThaHiC20911103107995	AAACGCCACTAGAAAGGGGAATCAAAAAGAGCGTGAAAAAGATCTCAAAATGCCCACTTTCTTCACAAACATGTGGCTCTCCTATTTCTACATGTCTCTCTCTCTATTCTGACGTGTAAT	1	-	Chr1:26163338-26163457
Chr1:26163481-26163661	AJ_ArThaHiC20911103108004	CGTAGATCTGACTTTTTATCATCTGTTTTTAGGTTTATCTTTTTCAATACGTTTACACCATTTTGAATAAGAACCAAGTGTTTCTTCTATTATTCCTTTTAAAATCCGACGTGGCAAAAC	4	-	Chr1:26163482-26163601
Chr1:26198553-26198763	AJ_ArThaHiC20911103108156	GGGTGCATCATGCTCAGCACCAGTTTCTTCTACTATCAAGAAAAACTGGAGAGATCATCCTCCTTCTTCTTATTCTCTCAAGATTCACAACTTCTCCCAACTTGAGAAAACTACTTCCTT	1	-	Chr1:26198632-26198751
Chr1:26199735-26199897	AJ_ArThaHiC20911103108230	AATTTCAAGCAAGGACATGTGCGAGTTCTTAACCCACTTGGATCTAATCACGTCGAAGTACAATGTATTTTCTAAAAAAATAAGTCTTCTTATATATACGGAGATATTCATTTGAAATTG	4	-	Chr1:26199754-26199873
Chr1:26204378-26204557	AJ_ArThaHiC20911103108345	TCATCACAAACCCTAACCTCCAATTTCTGATTCTACGATTGATCTAAGGTTTTAATCAATTCTTCTATCATCATGATTTATTCCTCGAATTTTTTCCGATTTTCCTTTGAACTGATTTTG	4	-	Chr1:26204414-26204533
Chr1:26216463-26216642	AJ_ArThaHiC20911103108482	CTCTACTACTTCCGAACCTAACTCCGAACCTAAGAAGCCTCCTCCTAAACGAACCTCTACTAAAGACCGACACACCAAAGTCGAAGGCCGAGGCCGTCGGATCCGTATGCCTGCCATGTG	1	+	Chr1:26216476-26216595
Chr1:26216642-26216827	AJ_ArThaHiC20911103108492	GGACTGGAACCATTCCGGCTAACTTCACTTCTTTAAACATCTCACTTCGTAGCTCAAGATCTTCTCTCTCTGCTGCTCATCTTCGTACAACTCCTAGTAGCTATTACTTTCATTCACCAC	1	+	Chr1:26216703-26216822
Chr1:26216827-26216982	AJ_ArThaHiC20911103108495	CATCTTCAACATCAGCATCAGGTTCGTCCCAAGAACGAGTCACATTCTTCGTCTTCTTCTTCTTCACAGCTTTTAGATCACAACCAAATGGGTAACTATCTAGTACAATCAACTGCTGGA	1	+	Chr1:26216840-26216959
Chr1:26267440-26267648	AJ_ArThaHiC20911103108550	TGGATATTGCTTAGAGGGAGAGAAAAGACTTTTGGTTTACGAGTACATGCCTAAAGGAAGCCTGGAGAACCATCTATTTCGAAGTAAGTAAGGATCGATTTGGGCTGAGCTAGAGTTACA	1	+	Chr1:26267489-26267608
Chr1:26278714-26278935	AJ_ArThaHiC20911103108642	GATTCTGTTATATATTTACATATAGTTACCATATAATTCTTATGTCTGAAATTAATACAGTTTTACTGCATCTGATAAAAGTCAACTTGCTTGTTCGGAAATGGTCTCGAGTATCGAAAG	5	-	Chr1:26278744-26278863
Chr1:26278935-26279110	AJ_ArThaHiC20911103108648	CAGTTGATCTCAAGATCGCATCTGAATCATATAATAGCATGATCAAAGAGGAGACCGTTTCATACTTCCAAACTTTCGATGGTGTTATGGCAGAATCTGACAAGGTAAAACAAAACACTA	3	-	Chr1:26278967-26279086
Chr1:26397004-26397175	AJ_ArThaHiC20911103109241	TCATCAAATCTTTGCAGGAAATGGATGATCTTTGGAGACAGATCGAGGCACTTAAACCTATAGTGAATGCCATGCTGCTTCCTTGTAACGGTGCTGATGCAAAGAAGATAACTTGTTTCA	1	-	Chr1:26397032-26397151
Chr1:26407314-26407480	AJ_ArThaHiC20911103109265	CCTCTCGCCTTCCCAAAATTCCTCGTTATAATCAGCCATGGATCCAGAGTCCAAATGGGATTTTGACAATCAGTTTAACTGTATCAGGAGTCATCATACTCATTATCTTGAGTCTCAGTT	1	-	Chr1:26407337-26407456
Chr1:26407480-26407647	AJ_ArThaHiC20911103109270	ATGTCCCTAAGCCAAAGATTCCACTTCTTTCTCTTGAAAAGGATCTTTCTCCATATTTGCTTGAACTTATGTATGTTGGATTCACTTCAACTACAGGGGACCTAACTGCATCTCACTATA	3	-	Chr1:26407504-26407623
Chr1:26407995-26408179	AJ_ArThaHiC20911103109293	GTCTGATCAGACTCACAAATTCTACACCACAAACAACTGGTCAAGTTTTCTATAATGACCAACTTCGATTCAAGAACTCAGTGAACGGTACAGTTTCTTCCTTCTCCACCACTTTCGTTT	1	-	Chr1:26408000-26408119
Chr1:26410996-26411149	AJ_ArThaHiC20911103109383	ACCTAAGATTCCTCTGCTTTCGATGCGGAAAGATCTTTCTCCATATCTACATGAGTATATGTACATTGGCTTTACTTCAGTGGGAAGTCCAACTTCTTCTCACTACATTCTTGGCTGGAG	1	-	Chr1:26410997-26411116
Chr1:26411668-26411876	AJ_ArThaHiC20911103109419	GCAACGCGTAGTCAAGAAGAAGAACGTGTTTAACATGGACCAATCTTGATTAAGATAATAGTATGATCAAATGCTTATATAAACACACTAAAAAGGAATCAAATTTAACCATTCCACAAA	4	-	Chr1:26411757-26411876
Chr1:26415081-26415247	AJ_ArThaHiC20911103109485	CACCGACCCGGGAAGAAGAAGAAGAACAGATCAACTAATTTCTGCTTTCAACTCCACATTAAACCAAAACCTCCAAAAAGAATCATTTATTTAAATTATCTTCCCGTTTTAAGTTCCTGA	3	-	Chr1:26415092-26415211
Chr1:26447220-26447410	AJ_ArThaHiC20911103109933	GGTGTTACCGCAGAAGGGCAGATGATCTTTGACGCGATTTCTAAGACGTAAGGATCTCTTTGGTTCTTTATATTGAATGGATGATGATGATGATTTTAATACAATCCAGTAGTGTTTGAA	3	-	Chr1:26447279-26447398
Chr1:26453373-26453597	AJ_ArThaHiC20911103110033	TCTGTGTTATAGCAAAAGGTGCTTGTAAGAGTCGTAACTTTAGTTTGGGCAGTTTTCAACAGTCACAACATTTAGTTTGGTCAGATATGTACTTAAGATCAGTATGTAAGTGTGTGTGTC	3	+	Chr1:26453434-26453553
Chr1:26705307-26705537	AJ_ArThaHiC20911103110347	CTCCAAATCCCAAATTTGAAAAACACTTCCAAGGGAAAAATCGCGGATACATACAAGATTGCAAATATCTAAGCTTGGAATTATATTTGTTTTCTTTCTTTGGATCTCTGCTTTCAAGTC	4	+	Chr1:26705368-26705487
Chr1:26705537-26705738	AJ_ArThaHiC20911103110356	TCCAAAACAGCTCTGTTTTCTTCCTTACCGGGAATAGTCAGCCGGAGTTTTTTAACATTCGCACCGGCTTCTCCTTCCGTTAAACCCCTTAGGATAAGATCTTCAAATGTTACTAAGTTC	1	+	Chr1:26705574-26705693
Chr1:26705738-26705974	AJ_ArThaHiC20911103110364	TTGGAAGGAGAGAAAGGTCGAACAGTTGACCTAACGCCTGCAGCTGTTGAAGCAATCGCAGAGAGCTTTGGAGAATGGGTTGCAGCAACGGAGAGTAACGGAAACGGCGTCATTAAGATT	1	+	Chr1:26705775-26705894
Chr1:26710418-26710624	AJ_ArThaHiC20911103110420	CCATGTCTCTAAAGCATCTCCAGGAAACATTCAAGGTTGTGATCTTCACGAAGGCGACTGGGGTCAAGTCGGCTCTATCGTCTTCTGGAACTACGTTCATGGCAAGTCAATGTTATATAC	1	-	Chr1:26710481-26710600
Chr1:26710802-26710966	AJ_ArThaHiC20911103110429	GCCAGATAAGAACTTGATCACGTTTAGGGTTATAGAAGGTGATCTGATGAAAGAGTACAAGAGCTTCTTGCTCACCATCCAGGTGACCCCTAAGCCTGGAGGCCCTGGAAGTATTGTGCA	1	-	Chr1:26710823-26710942
Chr1:26718996-26719153	AJ_ArThaHiC20911103110524	TAGCGGCAGATGGTTAATGTGATCACATAGGAGAATGACTTGATCAAAATATTATTATCAATTAGCCATAAAATAAAATTCAGTCTTGTTCTCGCTCTATTCATTCCTCTCTTAAAAGGA	4	-	Chr1:26719010-26719129
Chr1:26719174-26719387	AJ_ArThaHiC20911103110531	TGACAAAAAAGCTATACGATCTTTTTGGATGATTTAGAAATATAAAATACTGAATAGTACATGAATCAGTTGGCTTATGAAATACTGATACTCCTTCAAAATCTTTTGTATGACACGAGC	5	-	Chr1:26719220-26719339
Chr1:26725950-26726102	AJ_ArThaHiC20911103110654	ATCCGGAGAAGAACCTGATCACGTTCAAGGTTTTAGAAGGTGATCTGATGAATGAGTACAAGAGCTTCGCATTTACACTCCAAGTGACCCCTAAGCAAGGGGAGTCAGGGAGTATTGCGC	1	-	Chr1:26725959-26726078
Chr1:26726438-26726619	AJ_ArThaHiC20911103110674	CCGAAACTATTCATGATATTATTTTAACGATCAAAAATGGTTCTATCATTTAATACTTTCTCACTCATTCTTCTACAAATAGAGGCTAAATAACTCAAAAAGAAAACACACTCATCTCCT	5	-	Chr1:26726464-26726583
Chr1:26752770-26752923	AJ_ArThaHiC20911103110860	TTCTAACTCTTTTCATAATTGCTCTTGACGAATCTTGGTAAATTATGTATGTTCGTTTTAAGATCAATCTAAATGGACTTGAAATTCTACTGTTTTCAGCTTTACTTCAACGAAATTTGC	5	+	Chr1:26752795-26752914
Chr1:26795748-26795923	AJ_ArThaHiC20911103111118	ATTGAGAGGTCGAAACTACGTAAGGCCAGAAGTTAAACAACGCAACTTCTCAAAAGATGAAGACGATCTCATCCTCAAGCTTCATGCACTTCTTGGCAATAGGTTCGTATTCATTCTTCT	1	-	Chr1:26795804-26795923
Chr1:26872491-26872652	AJ_ArThaHiC20911103111430	CTGTGTAATATCACAGTACGGAGATGGTAGGCGTTCTAGGGAATATCAGGTATACACAATGACGGTGGGATCAGGTGAAGAATCTAATTCTTGGAGAGTGATCACATGTAAGCATGATCA	1	+	Chr1:26872516-26872635
Chr1:26898246-26898450	AJ_ArThaHiC20911103111542	AACTAGTGCATCTCCTGATCGAGAACAAAAATAAAAAGCTTGTCGTGTAAGTTTTGTCACAACGTACTTATCAAATTAAGCATCCTTTTACAGATAGTCTAACTAGTATCTCTTCTGCAG	3	-	Chr1:26898283-26898402
Chr1:26899240-26899429	AJ_ArThaHiC20911103111585	CTGTAGCAAAAACAACAGATTTCGAACAAAATTTTGATGTAGATCATAGCTAAAAAATAATCTGGAGTGAGCGACAAGCAAGCGGCGGCCGTCATGGATTCATCGCCGCCGAAGACTATC	1	-	Chr1:26899286-26899405
Chr1:26917034-26917208	AJ_ArThaHiC20911103111698	TGAAGATGCGTTTCTTGATCTGATTCGAGCTGATGCGGGGAAGCTGGTGAGGTTGAGGCATCCTGGTGTGGTTCATGTGGTGCAAGCGCTTGATGAGAATAAGAATGCTATGGCTTTAGT	1	-	Chr1:26917041-26917160
Chr1:26917208-26917380	AJ_ArThaHiC20911103111701	TACAGGAAGTTACGGGACCAAAGGCTCTTCAGGATTACGAGCTACTTGATCAGATCGGTTCCGCTGGTCCTGGTCTAGCTTGGAAGCTATACGCAGCTAAGGCGCGTGATTCCACGAGGC	1	-	Chr1:26917249-26917368
Chr1:26919278-26919483	AJ_ArThaHiC20911103111739	TTGGTTTACATTGTTCGATCTATGTGGCGAATGCAGTTATCTCTATGTACGGTAGGTGTCATGATGGTGCCGCAGCATATGAAGCTTGGACTGTGTTTGAAGCCATAAAGTTTAAGAATT	1	-	Chr1:26919316-26919435
Chr1:26919483-26919657	AJ_ArThaHiC20911103111746	ATACAATGCCTGAGAGGAATGTTGTTTCATGGACTGCATTGATCACAGGCTATGTACAGGCTGGGAATGAGCAAGAGGGATTCTGTCTTTTCTCGTCTATGTTATCCCATTGTTTCCCTA	1	-	Chr1:26919514-26919633
Chr1:26944916-26945110	AJ_ArThaHiC20911103111823	ACGGCCATGGTTGGCGCCGGAGTTCTTGGTCTCCCTTTCGCCATGTCACAACTTGGCTGGTAATTTTTTAAGAAATGTTTAAATTTGTCTGATCTTAACTTCACAAAATAAAGTCGTAAT	1	+	Chr1:26944953-26945072
Chr1:26945110-26945318	AJ_ArThaHiC20911103111830	ATAACGTTCTACTCGTTATGGCAAATGGTACAGTTGCACGAAGCCGTTCCAGGGAAACGGTTGGACCGTTACCCCGAGCTAGGGCAAGAAGCTTTTGGACCAAAACTAGGTTACTGGATC	1	+	Chr1:26945135-26945254
Chr1:26945318-26945513	AJ_ArThaHiC20911103111838	AATTTGTCGAGCTTCTATTTCCGAATCTCGAACATATCCGTCAGACTTATTACATCCTTGGATTCGCCGCGCTTCAGCTTGTCCTCTCTCAATCTCCTGATTTCAACTCCATCAAGATCG	1	+	Chr1:26945331-26945450
Chr1:26964402-26964629	AJ_ArThaHiC20911103111891	CGAAAGTCGAAAACATCATCAGAAAAGAGCTCAAGAAAGTCTTCAAGCGAGATATTGGTTTAGCCGCTGCCATCCTTCGTATACATTTCCATGATTGCTTCGTTCAGGTTCGATCTTTTT	1	+	Chr1:26964451-26964570
Chr1:26967575-26967788	AJ_ArThaHiC20911103111981	TTCTGGAACGTGCTTTCAGCATCGGAAAGAGTGTCAATGGATTTCCTTTGGTAATACACTCTTATTTATCAGAAATGAATCTTTATGTTTAATAATGTGTGACTCTTAAGATCACTGTCG	3	+	Chr1:26967612-26967731
Chr1:26993762-26993953	AJ_ArThaHiC20911103112001	GAAGAGCAGACTTAACAGATTCATTCGGTTGCGGCTTCCGTTTAGAACGCATGATCCCTTCTACTTCTTCGTCAAAATTGTGTTCAGTTTTCTTTATTTGTTTTAATGATTGTTGTATTT	3	-	Chr1:26993822-26993941
Chr1:27087879-27088093	AJ_ArThaHiC20911103112099	TCAAATGAACGGTCCAGATTCATCTCCTCGTCTCTCTCAAGATCCTCGTGAGCCTCGCTCATTATTATCATCTTCTTGTTTCCCAATCACCCTCAAGGTTTCACTTAACAAAACTCAGAT	1	-	Chr1:27087950-27088069
Chr1:27104104-27104328	AJ_ArThaHiC20911103112328	ATATATATCCTAAGTGAAAATGAACCTCTTGAACGTTCTCTTTTTGAAATGTACTGTGCAGGGCATTTACGGCTATCCGATTGAGATCCAAGCCCTCTTTTTCATGGCTCTTCGATCCGC	1	+	Chr1:27104177-27104296
Chr1:27122351-27122522	AJ_ArThaHiC20911103112371	ATGATAATATATCTTAAGATCTTATCTGATTTTTAACACAATATGTAAAAACATATAAAAAAACATTGTTTGCGAGCGAAATTTTGAATAAGATGTTTCATTGTTTGCGAGCGTAACAAT	6	-	Chr1:27122355-27122474
Chr1:27132029-27132211	AJ_ArThaHiC20911103112470	CAGAAATTTCTCTTCAAGAAGAATACGTCACCGACGCCGTTGACCACCGTGGACTTGCCGCCAGAAGATCCAATACCGGTAGATGGAGAGCCGCCTTGTTCATAATCGGTAAGCTCCAAT	1	+	Chr1:27132078-27132197
Chr1:27132211-27132365	AJ_ArThaHiC20911103112474	TTCCTCTTTGAATCTCTCTGAGAATATATTTGCAGGTGTGGAGGTGGCTGAGAGGTTCGCTTACTATGGAATCGGATCAAACTTAATAAGCTACTTGACTGGACCACTTGGTGAATCCAC	1	+	Chr1:27132224-27132343
Chr1:27134398-27134605	AJ_ArThaHiC20911103112575	GTCGCCGACGCTTTTCTTGGTCGCTACATAACAATTATCATCGCTTCTTTTATCTATGTCCTGGTTCGTCTCCTTCTGTCTCTTCTCTTTCGATCTGAATTTTACAATTAGTGAAGGAAT	1	+	Chr1:27134447-27134566
Chr1:27134991-27135161	AJ_ArThaHiC20911103112593	TAGTATGTGTGCAGGAATCGGCCTAGCGATTTTAGTGGTTGTGTACATCCAAGAAAATGTAAGCTGGGCACTTGGGTTTGGAATCCCATGTGTGTTCATGGTGATCTCTCTTGTTCTTTT	1	+	Chr1:27134992-27135111
Chr1:27170584-27170738	AJ_ArThaHiC20911103112827	CTTTTCCAACTTTCCAATACTCCACCGTGAAGACGCTTAGGATCGGCAAAGAAGCACTCGAGTGTTCTGTTTGCTTAAACGAGTTCGAAGACGATGAAACGCTGCGTTTAATTCCTAAAT	1	-	Chr1:27170595-27170714
Chr1:27170789-27170945	AJ_ArThaHiC20911103112830	TCAGACGTTTCCGGAGATAGCTCTCGGTTTGACCCAACCATGGCAATACTCATGATCGTCCTCGTCAGTGTTTTCTTCTTTCTTGGGTTTTTCTCAGTCTATATCCGAAGATGTCTCGAG	1	-	Chr1:27170814-27170933
Chr1:27283902-27284063	AJ_ArThaHiC20911103113568	AGCTATCCAGATAGCTATGGCTCGTCTTGAAGACGAGTTCAGGAATATTCTCGTTTCTCATAGTTCTCCGATCAACTCTGATTCGTTAATGCTGTCTTCTTCATCTTCTTCTCACCTTGA	1	+	Chr1:27283927-27284046
Chr1:27284519-27284680	AJ_ArThaHiC20911103113573	TCATGGAAACAGTCAAAGGTCCGGCGATTCAGCTTTTTAACTTCGCGGAGGCGATTAGTATCAGTCGGAGATCGCCGGAGAAGCTTTTTAAGATCCTTGATCTACACGACGCTTTGATTG	1	+	Chr1:27284544-27284663
Chr1:27497108-27497327	AJ_ArThaHiC20911103113878	CGCGGACGAGCTCGTTAATTGGTTCTCTTGATCCATTAGTCTCGAGTGACTCTCTTCTCATCTCGATCTCGTCGAAGACTCGAAGTCTCTATATTATTGTCTATTGTTCTAATGGGAAAC	1	-	Chr1:27497208-27497327
Chr1:27499156-27499357	AJ_ArThaHiC20911103113946	TCCGATTAAGCATCTGAGTTTCGATAAAATCTAGACCTAGTGATTAGTGATGATGGCAAAATTTTCAGGATTTTTGAGCTGTTTCTTAGTGAGGACCTGTTTTTGTTGTTTGAAACTTTC	3	+	Chr1:27499157-27499276
Chr1:27505910-27506097	AJ_ArThaHiC20911103114088	ACACAGTCAATGTTCATGAACCACGGATCCTAATCTCCCCGATCTTCGATTCATTGTTTCAGAAATCCCCAATTACTGTCTCTGTGCGTAAAATCTCTAGAGAAACCTTAAAATTTTCCG	1	-	Chr1:27505954-27506073
Chr1:27508738-27508910	AJ_ArThaHiC20911103114142	TTCTAAATTGAAACCATTGTCACATAACACATGGCTAACTTGAAATTCTTGCTGTGCTTGTTCTTGATCTGCGTTTCCTTATCGCGTTCATCAGCGTCTCGACCGATGTTCCCAAACGCA	1	-	Chr1:27508791-27508910
Chr1:27508910-27509076	AJ_ArThaHiC20911103114150	TAGCCAGCCAATAAGTTATCATTTCAATGAGATTCATCATGATCCCAATGCCATTCTCTATATAAATTGTCGCAACCATGTGATGAAAAAACACAACAACCCATCTATACCATTTTTCTA	4	-	Chr1:27508933-27509052
Chr1:27514152-27514374	AJ_ArThaHiC20911103114226	GCGATTCCCTTCAGGTGACTTTGTTATCTCCGACGATGCTGTTAGAGTTAAAGATCTGGAATTCGCTGTTTCTCAGGTTGGTAAGTGTTCTTCTCTGGTGATATTTTCGTCTGATGAAAC	1	-	Chr1:27514243-27514362
Chr1:27573612-27573830	AJ_ArThaHiC20911103114480	CCCGTCGTTATGCTCCAGACACTGAGTAATTTCAAGGACGGTGAAGTCGTGCTTCTCCAAGATATCTGCAGAAAGGTAAGTGATTGAATATGAAGAGTAAGAAGAAGAAACCTTTTCGGA	1	+	Chr1:27573625-27573744
Chr1:27651189-27651360	AJ_ArThaHiC20911103114574	AGTGAAGGAAACACTACATTGATGGAGGAAGCGGTTTCAGAGATAGATTCGTCTGCCTCGTCAGGAGATCCACACGCACAATCAGTGATGGGGTTCGTATACGGGATTGGGATGATGCGT	1	+	Chr1:27651226-27651345
Chr1:27651360-27651582	AJ_ArThaHiC20911103114579	CGCGGCTGCGGGAGGAAATATGCAGTCTAAAATGGCACTTGCTTTTAGATATCTAAGACAAAATGTAAGCAAGCAACACTGAACATTTCAATTGGAACTTATCTAATTTTGAAGTTTTTT	3	+	Chr1:27651385-27651504
Chr1:27654716-27654927	AJ_ArThaHiC20911103114621	GATTCTGATTCGTTCGTTTGAATCAGTAATCGCGCATCTCGTCTCGTCGGAGAAGAATGTCGCTTATGGATAATCTGTTAGGTATCCTCCGCGTTCGTGTCCAACGCGGTGTCAACCTCG	1	+	Chr1:27654717-27654836
Chr1:27669521-27669707	AJ_ArThaHiC20911103114692	TATAATATAACGACTTCTTCTAATTCATCTGAGAGGAAAGTTTTACCTTAACTCTTTCTCTGCCATCTCGATCGCTATCTTTTCTCCAGTATCCCTCTCTCTTTCATTTCACCACGTGAT	3	+	Chr1:27669570-27669689
Chr1:27760179-27760335	AJ_ArThaHiC20911103114893	GTCTTCTTCACAATTCGATACCAAGAAGAGAAAATCATTAATGGAAGCTGTTTCTACGTCGGAGAACAGTGTCTCTGATCAAACTCTCTCTACCTCTTCTGCTCAAGTTTCCATAAATGG	1	+	Chr1:27760192-27760311
Chr1:27775958-27776204	AJ_ArThaHiC20911103115109	ATTTGATCATGTTCTTGCACGTCTTTGCATGTAGGAAAAGACAAAAAGAACTAGGCTTTGGTTTTCTTTTCATCTAGATTGCTCTTCTATGTGTGTGTGTGTGTTCTTATGAATTTTGTC	3	-	Chr1:27776025-27776144
Chr1:27872321-27872480	AJ_ArThaHiC20911103115274	TTGGTTTGGAGTTAGGTGAGCTTCCGCGGTGTTTGGAGTTGATCAACACATTGAAATGCCGGGAAGTGATTAGAGTTAGTATAATCAGCGAAGGAGCATTTCGTGCTGGGTTTGAAGTGA	1	-	Chr1:27872337-27872456
Chr1:27872943-27873189	AJ_ArThaHiC20911103115312	ATTCGATCACTATCCTCACGAATTCTCACACCTATCAATCAATCTCACTACAGGAAACGAATTTTACTCGCGAATCTCCTTCAGAGGTATGGTTTCCCTCCTTCTTCTCTTCAGCACTTC	1	-	Chr1:27873010-27873129
Chr1:27914528-27914727	AJ_ArThaHiC20911103115458	TCAAATAAATCAACGGACAGGATAAGCGAAATTCTTACCATAAGCCTCAGGGTTTTCACTACTGGCGAGAATTGAAAGACGCTTCGAGAGAGATAGATCATCTCCGTTAAACCCTAGCGA	1	+	Chr1:27914565-27914684
Chr1:27914856-27915098	AJ_ArThaHiC20911103115467	GAGTGATGCGTATATGTGTTTAGTGAGTTGACCTTGTAAGCTTTGGTTAATTTTTCTTAAATTCTCCAATCGAAATGACCTTGTTGCTGGAACTAGAAATTTGACGTGTAGCAAAACTTG	3	+	Chr1:27914905-27915024
Chr1:27980343-27980527	AJ_ArThaHiC20911103115825	CAATCGCAATACTTATGACTTGGTCAACGATCACCACAAAAAAGCGTACATTAGTTTGTCAAATATGCGCATGTTAGCATACTCTAGGTGACGCATCTTCTAAGTAAACGCCAATAATCC	2	-	Chr1:27980372-27980491
Chr1:27988677-27988877	AJ_ArThaHiC20911103115835	TGATACAAATTTGTGATGCATGTAATGTTTTAGGTGTTACATAGTTTAGGAGCGAGGAAGCTAATGGTGTTTGGTTTAGGACCAATGGGTTGTATCCCACTGCAAAGAGCTCTAAGCCTG	1	-	Chr1:27988686-27988805
Chr1:27988987-27989177	AJ_ArThaHiC20911103115843	AAGATTTTCGCTGTGGAAGCAAATAGAATTATTCCAAGGGACACAAGATGTAGTTGTGGCAAAGATAGGGAAAAAAGAAGCAGACAAGTTCTTTCAAGATGCTCGATACGTCGTCGCTTT	1	-	Chr1:27988988-27989107
Chr1:27989177-27989398	AJ_ArThaHiC20911103115848	ACCAGTAGCCTTCTTGGATCCATCAATGAATGAAGATGTAATACTTGAAAATGGAGTGAACTATGCTTCAGGAGGTGGTGGAATCTTGAACGAAACTGGTGGTTATTTCGTAAGTCTCAT	1	-	Chr1:27989231-27989350
Chr1:27991586-27991766	AJ_ArThaHiC20911103115998	GTATATAGGTATGGTGAGAAGAGAAGTTCTTGATGCTTATCTGAGAGAGAGAGCTGAGAAGAGTGGAGCCACTGTGATTAACGGTCTCTTCCTTAAGATGGATCATCCGGAGAATTGGGA	1	+	Chr1:27991599-27991718
Chr1:27998377-27998595	AJ_ArThaHiC20911103116178	TTCAAGGATCTCAGAAGATCAAATCAATGATCTGATTATCAAGTTGCAACAGCTTCTTCCTGAGCTCAGGGACAGTCGTCGTTCCGACAAGGTATGCTGAATCTAACTAAGTCAACTAGT	1	-	Chr1:27998440-27998559
Chr1:28041604-28041780	AJ_ArThaHiC20911103116265	ATATATGTTTCAGGTTTGCTAAGGTGTAGCAAGAGTTGCAGACTTAGATGGACTAATTACCTTCGTCCCGGGATCAAACGAGGAAATTTCACTCAACCGGAAGAGAAGATGATCATCCAC	1	+	Chr1:28041641-28041760
Chr1:28131913-28132122	AJ_ArThaHiC20911103116642	TTGTGTCATTTATTAGAGCAAGATTTGAATAAGCTCTTCTCGTGTTTTCCTTACAAAAATTCTGTTGTATATTTGCCAGGAGTCTTCAGCACTCAGAGAAATCCCAGTAGTGATAATGTC	3	-	Chr1:28131919-28132038
Chr1:28132122-28132280	AJ_ArThaHiC20911103116646	GCTGGTTTGGCTCCCAAGAAATCTAAGGTTTCACAATGTGGATCAAAAGTTTAACCTTTAGAGGATGATTTTATTATTTGTTTATTGATGCCGTTTATATGAACAATTTTGCAAATTTTG	4	-	Chr1:28132137-28132256
Chr1:28132418-28132593	AJ_ArThaHiC20911103116650	TTGCCGTTGATGATAGTTTCGTGGATCGTAAAGTTATTGAGAGATTGCTTAAGATCTCTGCTTGTAAAGGTAAAAGGCAAAACTGTTTCTCTTTACGTTTTCTGCTTTTCTTTTGTTTGG	3	-	Chr1:28132462-28132581
Chr1:28134058-28134214	AJ_ArThaHiC20911103116744	ACTCTGGAACCACGGCCCTAAAGCTCTCCAATTCTTCCACTTCCTCGACAATCACCACCGCGAATATGTCCACGACGCTTCCTCCTTCGATCTCGCAATCGACATTGCCGCCCGTCTTCA	1	+	Chr1:28134059-28134178
Chr1:28195000-28195157	AJ_ArThaHiC20911103117067	GATTAGCTAAGCTTTTAGAGAAAGTAGCTGTCAATAAAGAGATCATTGTGGTTCTTGCAAATTCAAATGTGAAACCAATGTTGGAGTTGCAGATTGCTAGTGTAAAGAGAGTTGGTATTC	3	-	Chr1:28195014-28195133
Chr1:28197948-28198175	AJ_ArThaHiC20911103117104	AAACCAAAGTTTAAATGGTGAACTTCATCCTTTCTCTGTTTATCTTTTTCAGGTTGCATCGGCTTCATGTGAATCGCCTGAACGGGTCAAGATGTTCAAAGCAGAATTCGCAATCATCTC	1	-	Chr1:28197960-28198079
Chr1:28241534-28241734	AJ_ArThaHiC20911103117406	AGTACTAATATTGATGATAATTGCAATGGTAATAACAACAACACTCGTGTCTCTTGCAACTCTCAAACCCTAGATCACCACCAATCCAAGTCTCCCTCTTCGTTTTCCATCTCCGCCGCA	1	+	Chr1:28241595-28241714
Chr1:28241734-28241976	AJ_ArThaHiC20911103117414	CGAGTTTATGCCGAGTGGTGAAGAAGGAACAATCGAAGCTCTCAGATGCGCTGCTTGTGATTGTCACCGTAATTTCCACCGGAAAGAAATGGACGGCGTTGGAAGCTCGGATTTGATCTC	1	+	Chr1:28241795-28241914
Chr1:28241976-28242211	AJ_ArThaHiC20911103117427	AGTATGGAATGAGTCCTCCCGGAGGAGGAGGAATGGTGACGCCGATGAGCGTTGCTTACGGCGGTGGAGGAGGAGGAGCTGAGTCGTCTAGTGAAGATCTGAATCTGTACGGACAATCAA	1	+	Chr1:28242049-28242168
Chr1:28352851-28353047	AJ_ArThaHiC20911103118333	ATCTTTACAAAGACGAGATCTATAATAACAACAAGGGTTTCGAGATTTGGCCTCCGCAATACTTCCAACAACAAGAACATCAACAACAACAACAACAGCAACAACATGCCTCAGCTCCTG	1	-	Chr1:28352880-28352999
Chr1:28435078-28435291	AJ_ArThaHiC20911103118667	TTAGAACCGTCAAAGAAGCCGTTGCTTTGTTCGGCGAGAGAGTCTTAGCCAGTCAAGTCTACTCGAACCATCTCAAAGTGGCAAGTCTTTAGCTCTCTCTCTTTGTAAATTTGAACTTTG	1	-	Chr1:28435088-28435207
Chr1:28543485-28543674	AJ_ArThaHiC20911103119089	TCTAGCGAAGAAAGAGAAACCAATAATCGATCACGATGAGGCTGAGTTTCTGAATAGACGGCGTCTGACGAGCACGCGCCGGGAAGCGTTGAGTTTGTACAGAGACATATTACGAGCGAC	1	-	Chr1:28543519-28543638
Chr1:28554122-28554351	AJ_ArThaHiC20911103119182	CTTACGAGGTTACTTTGACAGAGCCAGGCTCTTACGGTTTCTATTGTGCGCCGCACCAGGGTGCTGGTATGGTTGGGAAACTCACCGTCAAGTAAATTGTCTAGATATTCTCTTGTTCGT	1	-	Chr1:28554124-28554243
Chr1:28681577-28681745	AJ_ArThaHiC20911103119655	GGACTTTTCACCGACGCATACGATCTTTTCTGTATAGCTCCGATCATGAAAATGATAAGTCAAATATATTACCACAAAGACTCAATCGGAACCGCTCTTCTCTCAACTTCTTACGCAATC	1	-	Chr1:28681602-28681721
Chr1:28682034-28682222	AJ_ArThaHiC20911103119676	AGTTTCTTTTGTGTAGAACCATGTCCAATGATCCGGTTCCTTAAGATGTTCTTAGACTCTGAAAAAAAGCACCTTGATGTGAAACGGAACTGTTTTAACCAAGATTTTGGCAATCACATC	3	-	Chr1:28682067-28682186
Chr1:28682951-28683192	AJ_ArThaHiC20911103119704	ATTAGATCCTTTTACTCATAAAGTTTTAACCTTTGCTCTGTTTGTATAGAAAAATCTTATAGGTCTCTTTGCTTTTACATCTTCAAACTTGACTTGTGCTTGTGATTTGATTGTTGTCTT	5	-	Chr1:28683013-28683132
Chr1:28712016-28712170	AJ_ArThaHiC20911103119842	TGATGGCGGTCAAGAGGAGACAACACTTGGGGAATCAAATCCTTTGAAGGGGGATCCGTCGAGTCCTCATGTTCCTGAAGAAAGTGTTAAGAAGTGGAAGACATGGTTGTTGAGTGATGC	1	-	Chr1:28712039-28712158
Chr1:28776864-28777087	AJ_ArThaHiC20911103119963	GAAGCAAAACAGAGTGTACCTCTTCTCACTCCCTATAAGATGGGAAGATTCAATCTTTCCCATAGGGTTGTTCTAGCACCATTGACGAGACAGAGATCGTACGGAAACGTTCCTCAGCCT	1	+	Chr1:28776925-28777044
Chr1:28777087-28777255	AJ_ArThaHiC20911103119972	CTCAAAAACCCTTCCTTTTGATTAAAGTTTACGTTTTTATTTGTGGGTTTTTGATCTGATCCTTACCACATGTGTGTGATTTGATCTTGAAGATATCAAGATACTCCTGGGATATGGACT	3	+	Chr1:28777136-28777255
Chr1:28778459-28778651	AJ_ArThaHiC20911103120000	TTTGGTCGGTGGTCAAAGTTATACATCGGAAGAATCTGTTGAAATCATATTGAGGCCCCTCATTTGTTATGTTATGTAATCTCCAATGGATCAAAAGTAGAATCCCAACTGTAGAAGATG	3	+	Chr1:28778496-28778615
Chr1:28778651-28778866	AJ_ArThaHiC20911103120008	TCTTTATGAAGAAATAAAAAAATCTAAGTGGTTGGATGCGTCATCAATGACGACCACGTCGTTAAAGACAGAAAGAAACACTTGCGTTCCTGATTCTCTGATCAATCAATGTGTATAAAT	3	+	Chr1:28778700-28778819
Chr1:28778866-28779072	AJ_ArThaHiC20911103120015	TCCACCGTTGTGAATTCATGGAAATGGTAAACGCAGAAGCAAAACAGAGTGTCCCTCTTCTCACCCCTTATAAGATGGGAAGATTCAATCTTTCTCATAGGTAATCTAAATTTTGATCCG	1	+	Chr1:28778891-28779010
Chr1:29012727-29012969	AJ_ArThaHiC20911103120326	TAAGTGCAATTTCTCTCTTTTTCTTCTGTTTTATGGGTGTTGGTGATTTAGGGTTTTGCAAAATCGTTTTGTTTGCTGGGTGATTAAGCTTGGGTGATTTAGAAAGACGAATTAGATCAA	3	+	Chr1:29012788-29012907
Chr1:29022503-29022753	AJ_ArThaHiC20911103120410	GGGAGATCTTATTCTGCTAATAAATGTTCGGAAAATGATAGATTTTCCATGGAAGGTGTTAGTCACTCAGAAAGCCGGGTACTTTTCATGCCTTTTTCTATTATGGTACCACCTCTTGTT	3	-	Chr1:29022574-29022693
Chr1:29022753-29022954	AJ_ArThaHiC20911103120420	TGGTGAAACCCTAGCTCCACTGTGTGAGGATCAAAACATTTGTTTAAGATGTTCATGGAGGAGGCGACAAGTAATGGTAAAGGTACAGAGCATAATCAGCCAAATGGTTTGGTGGAAAGT	1	-	Chr1:29022799-29022918
Chr1:29179434-29179662	AJ_ArThaHiC20911103121022	CTTTTAATTCACATTATTTCATTTAATTTATTCTTTCAATTCATATTATTCGTCCTTGTTGTTTCGTTATGTATTAAATATACACACACTAATTTAAGAAGATCACATGGACTAGAGGTT	6	+	Chr1:29179495-29179614
Chr1:29179662-29179859	AJ_ArThaHiC20911103121030	TAAGGCCCAATATGGTAGACGCCTAGACGGAGATAGTGAAAAGAGCCCAATTAATATACTAAAGGCCTAATAATAACAACAACACACACGCATGATCTTGTACTAGCTTTACTTCTTACT	3	+	Chr1:29179699-29179818
Chr1:29187453-29187684	AJ_ArThaHiC20911103121062	GTTTTGCGATGCTTGGCACGGTGGTGCAGTGGTGGTTAACATATTACCGTTTAAGATTTGGCCGGAAAAATCGAGAACGAAAGTGGTGATTCTACTCTTAAGCCTTCAAAATCAAAGCTT	1	-	Chr1:29187481-29187600
Chr1:29195871-29196066	AJ_ArThaHiC20911103121113	GAGTTTCTTCCGTTTCTGTTTTTTATCTGATCGGAAGATTCTAGCTTTCTTCTTTTTTTTGTTCTTTAGATAGTTTTTTTCTTACTCAGAAAAACCATTGGAGCTCTCGTTAAGAGTTTT	4	-	Chr1:29195911-29196030
Chr1:29298878-29299069	AJ_ArThaHiC20911103121618	CAACTTGCATCTTTAAGAGACATGGGAATCTATGAGCCATTTCAACAAATTGTCGGTTGGGGAAATGTTTTCAAATCTGATATCAATGATCATAGTCCCAATACTGCTACTTCCTCTATT	3	+	Chr1:29298915-29299034
Chr1:29374441-29374624	AJ_ArThaHiC20911103121732	TAATGTATTTTTTTCTTACAGATGAGAGAAGTCGTAAAAGACGTGGCTTCGAATTTCCCGACTGCTATTGTCACCGGGAGATCCATTGAGAAGGTACATTACATTTTTACCAAATATTGA	3	+	Chr1:29374478-29374597
Chr1:29414084-29414258	AJ_ArThaHiC20911103121927	AGGAACCCTCTACTCTAGAAAGAGGGATTTCACAGTCTGTGGAGAAGAGTTTCACAATTCATTCAAGAAGAGCAAACAAGAAGATCAATCACAGAGCACTCTGTTCAATGAACGACCAAA	1	+	Chr1:29414109-29414228
Chr1:29414310-29414533	AJ_ArThaHiC20911103121939	ATACTTATATTTTCAGGGATATTCAAGAACATCTGATGAGCATAGGGCATATCCCAAAGATCCAGTGATTTTTGGACAACCTAAGATGAGCCTAGACCTTGAGCTGAACCTTTCACCTTC	1	+	Chr1:29414407-29414526
Chr1:29414533-29414726	AJ_ArThaHiC20911103121944	CTCAATTCACAATGAAACAGTATCATCATCAAAGATTAAAGTTTTGACGAACACAAGTAAGAAGAGCATAATTGGGACAGGACTAAGTCGATCACCATCCTGGCTAGCGTTTGAAGGTGG	1	+	Chr1:29414570-29414689
Chr1:29447141-29447338	AJ_ArThaHiC20911103122040	ATCATTGGAGACTGCCATATTTGTTAATCGTGATATTAATTTAACTAATGTCTCAAACAAGCTACTACCGATCACCGTTCGGAGACACGACTTACACCAAAGTGTTCGTCGGAGGATTAG	1	+	Chr1:29447202-29447321
Chr1:29447338-29447567	AJ_ArThaHiC20911103122050	GCTACGGATTCGTAAGTTATATTTTCTTAATTCACACAATGTTTTTATCTCTTTTGGTATGCTTAAGGGTTACTCCGATCGTTAATTTAGGTGACGTTTCGGGAGTCGGACTCAGCCACG	1	+	Chr1:29447423-29447542
Chr1:29487306-29487554	AJ_ArThaHiC20911103122257	CCCTATCCTTCCTTCTGATCCTTACCTGAGAGCTCAAGCTAGGTTCTGGGCTGATTTCATTGACAAGAAGGTATCTTATTTCCTTTGTGCCCTTGATTGAATAATGTTGAAATTGAACTT	1	-	Chr1:29487387-29487506
Chr1:29487554-29487710	AJ_ArThaHiC20911103122266	GACAAGGATCGCATTGAGGGAGAAAGGTGTTGAATTTGAGTACAGAGAAGAAGATCTAAGGAACAAGAGTCCTTTGCTTCTCCAGATGAATCCGATTCACAAGAAGATTCCTGTTCTCAT	1	-	Chr1:29487579-29487698
Chr1:29499051-29499254	AJ_ArThaHiC20911103122424	GATTAGTTTCATCATCAAAGGAACTTTGTTAGCTCCAAAAGATCCTAACGCCATCAAACAAGACAGCTGGATTATTTTTAGGTACGTTGACTATCTCACGGTTTCAGGCGGCGGCATCCT	1	-	Chr1:29499111-29499230
Chr1:29499254-29499496	AJ_ArThaHiC20911103122440	TTGACTTATTGTCTTGATTTGGCGTTTTAGGCATTTACAAAGGCGTGGAAAGACGCTTGCCAATGGAAAGGATTACCTAGAGTGTATATACCATTTGGAACCTTCTACCTCGGTGCTGTA	1	-	Chr1:29499257-29499376
Chr1:29512855-29513099	AJ_ArThaHiC20911103122565	TCATCTCATCTGCTATATATACACTCCTCCGAGTACATAACCCAATGTCTCAGCCTTCAAAGCTATCAAAATCAAAAAAATTCTATCAAACAAGGAAATATATCAATGGCGGTATTGTCT	3	-	Chr1:29512908-29513027
Chr1:29523954-29524130	AJ_ArThaHiC20911103122732	CTCATCTCTCATCGCATGAATCACAAAGCCCACAAGGTCAGTTTTGTTTATCTCAACAATTTTCCCTTAGTGCTTTTTAGATAAATTACACGACTAGATCTTTTAACACGTTGTCTAAAT	3	+	Chr1:29523967-29524086
Chr1:29524938-29525178	AJ_ArThaHiC20911103122771	GCTACACTTATGGACACACGTTTCTCTTTCACATATCTTTGCAAGAAAAGATGCCAAAATAGGCTTTCTAGAGGCAACATCTTTGGACGTAGATGGTACTCTTACAGATGGTGATCGTGA	1	+	Chr1:29524999-29525118
Chr1:29525551-29525737	AJ_ArThaHiC20911103122803	ATTTTAAAGAAGAAGCTTGACCAGAGAAGATCCTCACATGAGTTCTGTTTTTCTCCCTTAATTTGCAGAACGATGATGGTGGATGGGGGTTACATGTTGAAGGCAAGAGCTTTATGTTCT	1	-	Chr1:29525582-29525701
Chr1:29527276-29527459	AJ_ArThaHiC20911103122992	TTTTGGTTTAATATGATGCAAGTTTAAATAGGTAACTCGGTTTGGTTTATTTTATTTCGTTGGTTTCGACTATCACATCGATCTATAATGTCAAATTTACAATCAAATTCTTTTAAAACT	5	+	Chr1:29527313-29527432
Chr1:29532430-29532588	AJ_ArThaHiC20911103123154	GGCCAAAGCGCTATGTTCTGCACAGTCATCAACTACATTTGCCTACGGATTCTGGGAGTAGAAGCAGATCTTGATGATATTAAAGGAAGTGGTTGTGCAAGGGCTCGTAAGTGGATCCTC	1	+	Chr1:29532455-29532574
Chr1:29605504-29605741	AJ_ArThaHiC20911103123279	TAGGAGGGTTTAGAGTGATTCATCTTGTGAGACCGTTCCTTGCATTCTTACCAGAAGTCCAATCTCCAGAAAGGAAGATTCCGTTTAGAGAGAAAGTCATATACACTGTGATCTCTCTCT	1	+	Chr1:29605565-29605684
Chr1:29615996-29616183	AJ_ArThaHiC20911103123522	AGTTTTCCAATGCTTTGGTTTTGGAAAAGATCATCTCAAGCTGTTCAGCTCTTGAAAGCTTGATTATAAGCAGGAGTTCCGTTGATGATATAAATGTTTTACGTGTTAGTTCTCGGTCTC	3	-	Chr1:29616028-29616147
Chr1:29617443-29617630	AJ_ArThaHiC20911103123672	CATCTGACATATATATGCAAGCTCAAGCTCTTTTCCTCGGCCGCCATTACCGTCGCGCTTTTCACCTTCTTAACGCTTCTAAGATTGTCCTCCGAGATCTTCGATTCCGTTACCTCGCCG	1	+	Chr1:29617468-29617587
Chr1:29617630-29617808	AJ_ArThaHiC20911103123679	TCTCAGATTGTTTCTCTTGATTTGAGGGTTTTAGGGTTTATCGGTAATTAATTTCTATGTGTTCTCAGGAGGAATTGAAGGAATGGGATCAGTGTCTATTGATGCTTGGTGATGCGAAGG	2	+	Chr1:29617655-29617774
Chr1:29617808-29617960	AJ_ArThaHiC20911103123683	CGGGAACGTGATAGATTTTGATAAAGATGGAGAGGACCGAGAGATTAATGTAAGTTTTTTCACGACTTTTAAATGTATAATAGAGATCTAGGTAGTATTATCTTCTCGATTCTGGAAGGT	3	+	Chr1:29617809-29617928
Chr1:29634872-29635095	AJ_ArThaHiC20911103123687	CAACAAAGGCTTAACCATGTACGTTAACAAAACCGGTACGCCGTTAGTTTACGGGGGATGGACGGATCACGACTTCCGCGGTACCGTCACGTTCGCCGTTACAAGAGAGTTCGATAATTT	1	-	Chr1:29634976-29635095
Chr1:29635095-29635278	AJ_ArThaHiC20911103123698	ATGGAAACATGGTGCTACACGACAAACATGGAAAATTCGTTTGGCAGAGTTTCGATCATCCCACCGATACACTCCTCGTCGGCCAATCCCTAAAAGTTAACGGAGTTAACAAACTCGTTA	1	-	Chr1:29635147-29635266
Chr1:29635278-29635486	AJ_ArThaHiC20911103123708	TGAGTTTCACGCGTTGGATCTGGGACGCCAATCGCAACAACCCCGTCGGAGACAACTCCACACTCTCATTCGGCCGAAACGGAAACCTTGTGCTCGCTGAGTTAAACGGCCAAGTCAAGT	1	-	Chr1:29635319-29635438
Chr1:29703258-29703449	AJ_ArThaHiC20911103123987	AGAATATCATAACTATCTATAGGGTCATCGTACGTCGTTATGTGGAAGTTGAAGATAGGAAAGGGAAATGGAGAAGATCCGCATTTATTCAGCAGCAATAACTTCGTCGGACGTCAAACA	1	+	Chr1:29703307-29703426
Chr1:29710827-29711009	AJ_ArThaHiC20911103124077	ACTCAAAGGTTGGAAAGCTAACGGAGGTGATCCCTGCGAAGATTCTTGGGAAGGCGTCAAATGCAAAGGCTCTTCGGTCACTGAATTGTATATAATCATTACCCTAATTTAATTACGAGC	1	-	Chr1:29710854-29710973
Chr1:29711236-29711475	AJ_ArThaHiC20911103124089	GTTCAGCAAAAGTTAATGGTCGTGAATGGTCATTCTTGTCCAAACCTCAACAATGTCTCTATCCCTAAATCCAATCACAATGGCACATTATCTCAAACCCTCGTCGTCTTGTCCGTGAAG	1	-	Chr1:29711260-29711379
Chr1:29714069-29714291	AJ_ArThaHiC20911103124096	ACGACCATTGGTCATGGATCCATCTATAGACCAGATTTATATGCCTGTCACGTCCTTGCCCCCTCCACAGGAAACCACCAATCCAGAAAATCTCCTTGCTAGCCGTATCTATTACATCAA	1	-	Chr1:29714124-29714243
Chr1:29714429-29714608	AJ_ArThaHiC20911103124105	CGTGGAGCTCCGAGAGCTTAACCTGTATGATCCTGATGAAAGTATTGCCAAGCTAGTCCCCATCAAGAAACATGGAGTCATAGCGATACAGGTAACAGTTTCAACGATAGTTCACTACAA	1	-	Chr1:29714453-29714572
Chr1:29741605-29741816	AJ_ArThaHiC20911103124531	CAAAACAAACTCACAACGCTCCAAACAAACCATTGTCACTCATCCATAAACCTCTCTCTTTCTTCTCTCTCTCTCTCGTTTGGATCTGGCCGTTGATTTTCTCCCGACGGCGATAAGTTT	1	+	Chr1:29741666-29741785
Chr1:29741816-29741981	AJ_ArThaHiC20911103124537	CAGGATTTTCCTACTTACGGATGTTTCAATCCACGAGCTTCTTTCAGCCGTGACGACGGTGGTCGGAGTTCTGGATCCGTCGCATCGGAGATTCCGAAGGAGGAAACAGCAGTCGGAGCT	1	+	Chr1:29741841-29741960
Chr1:29742326-29742505	AJ_ArThaHiC20911103124542	CTCCTCAAAGATTCCGATTCCGAATCTGTCTCTATATCCTCTTCTCGTATGTCTCTCTCCTCTTCCTCCTCTGGCCATGACCACGAAGATCTTCCAAGACTCTCTCTCGATGCAGAGAGA	1	+	Chr1:29742351-29742470
Chr1:29759901-29760126	AJ_ArThaHiC20911103124741	TGAAATATGAGATAGAAGAGAAGAGGAAAAGACAAGCGAGAACGATAATGGAGGCGATAGAGCAAGGACTGGTTAAAAGGCTTCGTGTCAAAGAAGAAGAAAGAGAGAGGATCGGCAAGG	1	+	Chr1:29759950-29760069
Chr1:29833772-29833935	AJ_ArThaHiC20911103124749	TTCCCACTAAGCCAATAATGTTTAGTATTTTAATGTTAATCTTCATCACAAATCTCATTGAAGAATCGTTAGATCCAGCGGAAGTTTTTTCTCCGACAAAGAACTCTTGAAGGTTGCAAG	3	+	Chr1:29833797-29833916
Chr1:29834831-29835030	AJ_ArThaHiC20911103124806	TTGGTGAAGATTCGAGCCCGAAGATAAAGAAGTTCATGAAAGTGATTCTTACCAAGCTAAGGAAAACAAATGACCAAAGTACGCTACTTGGTAAGATCGAAGAAAGTGCTCGAGGGTATA	1	+	Chr1:29834868-29834987
Chr1:29943124-29943298	AJ_ArThaHiC20911103125390	GTCTCTATCATTAAACCTCTCTTGTTTAAGAAGCAGACAAAGATCGTTCAGTTTGCAGCACCTTCATGTTTCTCTTGGACATTCAGGTTTTACTTATGTGGGTATATGTAATAGAAGATT	3	-	Chr1:29943155-29943274
Chr1:29965736-29965936	AJ_ArThaHiC20911103125492	TAATAAAGGCAGAAAAGGACTTGTGGCTGATCAATTGTGAATACTTAACTAACCATTAATTAACAATCAAATTCGAACCATTACACACAGACAGACGACAACTTTGACACGTGGCAAAAC	3	-	Chr1:29965781-29965900
Chr1:30043946-30044148	AJ_ArThaHiC20911103125735	ATTTGATCCTCTCTCTTTCTCTCTCTCTCCTCTCTAATTCTCTATTGCCATCAAGAGACCAGGAATGGTTCGTGCTTCGGAACAAGAACAGGAAACCTATAGGAGCAGGCTCTTCAATTT	1	-	Chr1:30043969-30044088
Chr1:30207458-30207668	AJ_ArThaHiC20911103126389	TTTAAACACCCTTGACGATCCTTTGGCCCGGACCAAATGGATGAACGTTAAAAAGGCCATAATGGAAGAGACGGAAGTTGTGAAGCAATTGGATGCAGAGAGGAGAGCATTTAAAGAAGC	1	-	Chr1:30207501-30207620
Chr1:30208239-30208486	AJ_ArThaHiC20911103126411	GCAAAAGCAAAAACTGGATCAGCTTTATTCGTTATGAGTCTTTCTCTAAATTCAAAAATTTAAATTCGAGTCTTATGATTGACGTTATGACTTGTGAGAAATTGATAATCTGGCCTTTTA	4	-	Chr1:30208319-30208438
Chr1:30336989-30337194	AJ_ArThaHiC20911103126467	GAGATACAAGAATGAAATAACTCAACTTATTGGCTTTGGCATTTGGTTATTACAGGGAATTAGATGATCAGCTTCAAGACGCACTCTATCAATTTTTAGAGGAAAGAGGTATAAGCGACG	3	+	Chr1:30337062-30337181
Chr1:30339533-30339726	AJ_ArThaHiC20911103126569	CAACGTTAGGGATTCAAGCTCATTCAACGATCCATAAGCCCAGCTTCTTAGGAAGACAAACGACGAGTTTAAGTCATGTTTTCAAACAGAGCATTCACCAGAAACCGACCATAGGAAAGA	1	-	Chr1:30339571-30339690
Chr1:30365559-30365718	AJ_ArThaHiC20911103126674	GGTTTCAGTTGTCTCTTGCTTAACCGAGATTGTGAGGATTACTGCCCCAGAAACCCCTTACAGTGATGATCTAATGAAGGTAATATCAAATTTCACTAACACTGTCTTCAATGTCACTGT	1	+	Chr1:30365584-30365703
Chr1:30424973-30425217	AJ_ArThaHiC20911103126869	GGGCAGGCCACGTCGTGACGACTGCTGCTGAGTAGAGCTGGGCATTCTACGTTTAGGATCGATTTTTTTTTTTTTTCCTTGGCTTTTAGTTTGTTACGGAGAAATGTAATCCGATTAACT	1	+	Chr1:30425094-30425213
Chr2:4554-4705	AJ_ArThaHiC20911103126987	GACGATCAGATACCGTCCTAGTCTCAACCATAAACGATGCCGACCAGGGATCAGCGGATGTTGCTTATAGGACTCCGCTGGCACCTTATGAGAAATCAAAGTTTTTGGGTTCCGGGGGGA	1	+	Chr2:4567-4686
Chr2:168808-168974	AJ_ArThaHiC20911103127363	ACGACCGGAAATGTTTTCAACTTTCCAAAGTAATTTGGGAACCTACAACTAAGGTGGAGGAGGTAGGAGATTGGTTTGTAAATTCTTATCTTGTAGGATCAATTGCGAGGTTAGGGGTGA	1	-	Chr2:168819-168938
Chr2:169431-169595	AJ_ArThaHiC20911103127397	TGACAGCCCTTCTTTTTGGAAGTTGTAGCCACAATTACTTAACCCTAATGCTTTTTTTTTTTTTTGTCAAACACTTAACCCTAATGCTAAGCGGCTATATAAATAGAAGATCTTTATTCT	4	-	Chr2:169452-169571
Chr2:189943-190113	AJ_ArThaHiC20911103127506	TTCTTCGATCCTAGCTCTTAAGAACCCTAATAATTCATTGATCAAAATAATGGCGATTTTGCCGGAAAACTCTTCAAACTTGGATCTTACTATCTCCGTTCCAGGCTTCTCTTCATCCCC	1	-	Chr2:189944-190063
Chr2:266915-267100	AJ_ArThaHiC20911103127937	GCCATGCTAATAAATTCGAAAGTAAGATCGAGAAGAAGCTACGGGAGATTGGCGAAATCTTTGTAGCTCGAACAGAGCCTAAGCTTCGTTCCTCGGGTTAGTTTAGTGATTATAATCTCA	1	+	Chr2:266940-267059
Chr2:338768-338943	AJ_ArThaHiC20911103127996	AAGCCTCAAAGTAATAATTACACTTGTTCATTATCATTTGCTTCTATTCATATCCGTTATCATCTAATTCCTGATCAGGGGATGTGCAGACCTCAGTGTTCTCATCAGCTCTAAGAATAT	3	-	Chr2:338824-338943
Chr2:344071-344256	AJ_ArThaHiC20911103128063	GTTGTGTTCGTTTATTAGATGGTATAGTATGTATGATTTATGTGTTCAATAGACGACCTTCAAAAGGAGGTAACAAATGCTGATTTAGTCATGAGTGACCAAGACAAGGATCTTGAAAAG	3	-	Chr2:344113-344232
Chr2:344256-344417	AJ_ArThaHiC20911103128068	GTCACTAAGATGGGAGAGAATCAGCATATTTGTGATGCAGATCAAGAGGGACCTGTCAATGGTCATACCATTGATGTTGAGGTCAAGCTTGATCCTGTCGATGGTCATACCATTGATGTT	1	-	Chr2:344298-344417
Chr2:347475-347675	AJ_ArThaHiC20911103128149	ATATGCCGAGATTGAAGATTACACCATCGACGGAGCCACCGTCTCTACTATTTTCCTTGGAAGCCAAGCAAATGGCGTCGTTTTCCCTCTTTACATCATCGAACAACAAATCTCTGATTC	1	+	Chr2:347556-347675
Chr2:347675-347907	AJ_ArThaHiC20911103128155	TGTTTTTTCGTTGTTCTTGGTAAAGTTTCGATTTTGGATCGTTTACGTGTGTGTATATATATAGGTTGGGGTCATCACTATGTAACGAAGAGGAAGTATCATATGATAATCCCAAACCGT	3	+	Chr2:347736-347855
Chr2:347907-348099	AJ_ArThaHiC20911103128164	ATTTGCTTTGTATCAACACTGATCTTGATGATCCTAATCACCTCTCTGGTGACCAAATCATGGACTTTTGGGACCGTCTTTGCTCTACTCTCCACACTAGGTACCACTCTTTGTTCTCTA	1	+	Chr2:347944-348063
Chr2:406744-406925	AJ_ArThaHiC20911103128395	TACGAGCTTCGAATGTTTTGGGATCAGATAACAACAAAGTCTCTACAAAATGGAACTCTTTGATAAGAGATGCTTTGAACAAGAGAGCAAGACCTCATCGAGACGAAGACTTGTCGGAAT	1	+	Chr2:406769-406888
Chr2:433191-433360	AJ_ArThaHiC20911103128478	TGCCTTCACCATAATCCTTGTCATGCTCTGGGAGATCTTGTCGGCATCAAAAAACATTTCAGAAGAAAACATAGTAACCATAAGCAATGGGTTTGTGAGAGATGCTCTAAAGGTTATGCT	1	+	Chr2:433192-433311
Chr2:443461-443686	AJ_ArThaHiC20911103128491	AAGTTACCTAATGATCTTTTCTTAAGCAGCAAGAAACTCCAAACCCTTGATCTTTCTTACAACAACATTACCGGTCCAATCTCCGGTTTAACCATTCCTCTTTCTTCTTGCGTCTCCATG	1	-	Chr2:443483-443602
Chr2:604609-604815	AJ_ArThaHiC20911103128551	ATCGAGGAAAGATCTACGGAGATTCAACACTGGGTTTCCTGAAGAATCTTTGATAAAGCTGAGATCTTTTGTTCACCAGTTTCTGAAAGAATGTAACGAGATGTTCTCTTTGTATGTTTA	3	+	Chr2:604670-604789
Chr2:684322-684481	AJ_ArThaHiC20911103128757	ATCATTCTCATCATCATCATGTGGGTTACAACATCATGGTTACCAACATCAAGAAAGAGAAGCCTGTGGTGATAAAGTACAAGGAATGCCTAAAGAACCATGCAGCTACCATGGGAGGCA	1	+	Chr2:684347-684466
Chr2:702100-702257	AJ_ArThaHiC20911103128857	GCCGTCCTAGCTTAGCAGGTACTATAACTCTAACTTAACACATACAATTTTCTTTCTTTCTATTTGTTCCTTTGTTCATAGAACTCAACAAAAACCATGATTTTGATCATTCGTTAGGGG	3	+	Chr2:702138-702257
Chr2:702377-702544	AJ_ArThaHiC20911103128860	GGAAACTGATCGTTTCAGCCACGGAATCAGCCTCTCAGAAATCACCAGTTAACTTGAGCGAGAAGTTTCTTGATTTAACTGTAAGCGTGATATGCAAGGCAGCATTCAGTCTAGACTTCC	1	+	Chr2:702402-702521
Chr2:702544-702760	AJ_ArThaHiC20911103128868	TTCTTCCCAAATGGTGGCTGGATCATCGACTGGCTCACGGGTCTACAAAGGCGGAGAGAAAAAAGCGTCAAGGATCTTGATGTGTTCTATCAACAAATGTTTGATCTGCATAAACAAGAA	1	+	Chr2:702605-702724
Chr2:710856-711048	AJ_ArThaHiC20911103128939	GTGCAACAACAAAGAAGTTGATCCGGAAGCAGAAGAAGGCGATGAGTGCTATTCCTGCTCTATCCAAACCATCGGTACAGACTATTATTTTTGTGCCACGTGTGATAAAAGGTTCCACAA	1	+	Chr2:710893-711012
Chr2:756429-756675	AJ_ArThaHiC20911103129188	CTCCACCTCTATTTATATGCCCTTCATTACGATTCAAACTAACAATAACGATCGAAGCTAAACTATTAGATGATGGGGGCCCAACGCCTGATGTTGATGGCAAGCTAAGGATTTCCCATC	1	+	Chr2:756490-756609
Chr2:856611-856835	AJ_ArThaHiC20911103129340	CTAAACGTCTACGTACAAAATACGAATATTGAACGTATAAAAAAAAACACTTTCTGAAATCTGCAGGTTAGAAAATTATTTAAGAGATCCAGTTGCAATGTGAGTAGTATACTAGTACTG	4	-	Chr2:856668-856787
Chr2:879886-880120	AJ_ArThaHiC20911103129418	TGTTGGCTTCCATGAACGAGATCGAAGGAGTAGTCGGAACAGAGACCAAGGAGATTGTGAGGAATGCCAAAATGTTGATTACAGAACCACATGATGATCTTAAGAATGGTAGAGAAGAGT	1	+	Chr2:880001-880120
Chr2:937492-937651	AJ_ArThaHiC20911103129616	TCGTCTCGTGAATTTCAATTTTCGATCGATTTTTACGATCATGTGATTGTTTCGCGTTATGGGTTTCTTCTGATTGTGATTTAGGCTTCGAATTTGTTAACTTTTTCGGTTTTAGGTTTG	3	+	Chr2:937493-937612
Chr2:942654-942808	AJ_ArThaHiC20911103129749	TATTTTGATCACCTGAATTGTAGGTTGTTTACAGCTGGTGATAGTGATGATATATCCACTGCTTTGCGATTCTTAAGCAAGACAAGGCCATGGACGACACTTACGGCCGTTGGCAGAGGA	1	+	Chr2:942667-942786
Chr2:942808-943020	AJ_ArThaHiC20911103129756	GCATTGATAATCCCTTTGACCTTGAGGAGATCACACGGACATCTCCGTATTCTACTAGTTTGGATCAACAGCTTACAAGGGGATTAGTTGAGATACTGCTGGCAAACAAGGTTGGGTATT	1	+	Chr2:942857-942976
Chr2:1008852-1009019	AJ_ArThaHiC20911103130172	ATGGAAATGACTATCTGTGGATTACAAATATGAAAGGAGATAATGGCAAACAACACTTTTGGAGGATCAAAAACGCATTGGAACTGGAATGGGAACCGGATGCATACGTTCTCTCGGCAA	1	+	Chr2:1008889-1009008
Chr2:1009088-1009308	AJ_ArThaHiC20911103130179	AGAAATAGAGTGAGTAAAAACATGATCACACTAAGTTAGTCATTGGTAATAAAAAAAATTAGGTCATGAGAATGGCAAAGAACTAGAGTGAGTAAACATGATCACACTATGTATTTGGAG	4	+	Chr2:1009149-1009268
Chr2:1080555-1080739	AJ_ArThaHiC20911103130777	TCCGGTGTCTTCGATCTTGCCACTGGTAAAGTTACAAGGCCAAATAAATTTCGTTATCATATGAGTTATAGTCATTGGTTTCTTCCAGGATTTGCTTAGTCTTTTGTTTGACTAGCTCTC	3	+	Chr2:1080592-1080711
Chr2:1129457-1129662	AJ_ArThaHiC20911103131038	GAGGATGGGAAGAGGGAAAGTTGAGCTGAAGAGGATAGAGAACAAGATCAATAGACAAGTTACTTTTGCAAAGAGAAGAAATGGTTTGCTCAAGAAGGCTTATGAGCTTTCTGTCCTTTG	1	+	Chr2:1129482-1129601
Chr2:1129662-1129863	AJ_ArThaHiC20911103131048	TACTTTTTCCCTCAAAGTTTCTATATTTTGATCCATGTTAGGGTTTTGATTCTTAAGGATTATAAAGGATATGAAAACTTTGTTGTCTTTCTTGATTTAGTTACAATTAATTAGTTGATT	6	+	Chr2:1129699-1129818
Chr2:1129863-1130027	AJ_ArThaHiC20911103131055	GATGATCAAAGTACGTACAAAGCGTCTAAGTTGCTCTAGATGATGATTAAAGCTAGAGAGTAGAGACTATGGCTGAAAAAAGTACAGTAGATATGTGTAGAAGCTATAGAGCATATATAA	3	+	Chr2:1129888-1130007
Chr2:1130027-1130203	AJ_ArThaHiC20911103131060	TGTTTCCAAAGGATTGATCAGAGTTTCCAAAGAGACTAAGAATTGACCTCTGGATATATACACAAAGCTGTAAAAGATATAAAAAATACTTTGACTACTTCTTTAAGTTAGTATCTCTCT	4	+	Chr2:1130052-1130171
Chr2:1148181-1148404	AJ_ArThaHiC20911103131168	AAAACCGTATATGTGTGTAGAGGTATCAAAGATACGTTTGTCTCCGGCTGGCATTATAGAAACATGTTGCATCGCACCAAGATGGATCAAGCCACTTTTGAGCTCATGTTTGATGCTTAT	1	-	Chr2:1148237-1148356
Chr2:1148882-1149130	AJ_ArThaHiC20911103131198	TTTTCAAGATAAGATTTCTTATCGTAATATAGGAAATGTGTGGCTTAAGATCCACGCATGATTAAAACAAATCCCTAAACACTTTGTCTATGAAATATAACCATCTGCTTGTAAGGTCAA	4	-	Chr2:1148927-1149046
Chr2:1239079-1239327	AJ_ArThaHiC20911103131791	CATAGCCCACAAATTTGGGGTGTAGATTGATCGTATGCACAAGATGGTCGATGTTGTTGTAAAATTTATGACAAACGTATACTAAGGCGATATGTATTATATTATTAACCCGGCCGGTTA	3	+	Chr2:1239164-1239283
Chr2:1364185-1364396	AJ_ArThaHiC20911103131838	TGTCACTCTTGCCACTGCTTTCGCAAACGTCTCCGGCTTCGGCATCATGGTAATTAGTTTATCCTCTGTTTAAACCACGTTCAAGATCCAAGCGAAACTTAACAAGTCTTGGAAATTTTT	1	-	Chr2:1364229-1364348
Chr2:1445457-1445628	AJ_ArThaHiC20911103131926	ATATGAATTATTGTTGCAAGGTTGATCTGAAGCCTTGGCATTTTTGGAACAAGAAAGGCTACAAGTCGTTCGATGTGGAAGGTAACCCGGTAGAGGTGTATTGGGATTTTAGGTCTGCGA	1	+	Chr2:1445470-1445589
Chr2:1447901-1448130	AJ_ArThaHiC20911103132072	GGATAGTTTCTATCAAGAGGATCAAACTGTCACGCTTCCTAGTGTTTTGTTTAGCTATAATGATTCACTTGAGATCTTGAAACTCAAGTGTGCTATCGATTTAGACTTTCCTTCTCGGGT	3	-	Chr2:1447951-1448070
Chr2:1448183-1448363	AJ_ArThaHiC20911103132080	GCCATAGCCACGAGTGTTTTGTCTAAACGTTGGAGATCTCTTTGGACTATGTTGCCAAAACTCAAGTTTGATTCCAATTTCAATCCTGTGTTTGATGATGATAACATAGATCCCACTATG	2	-	Chr2:1448220-1448339
Chr2:1448437-1448616	AJ_ArThaHiC20911103132087	GAAAGTTTCTTAGCGAATTGTTACCTCTATTAATTTCAATGGAACAGAAATTGTAAGTATCTTTGGTTCGTTTATGTTTTTCTTAGCTGTTATAAAGATCCAACCCTAACTCTTTGAACC	4	-	Chr2:1448461-1448580
Chr2:1450092-1450317	AJ_ArThaHiC20911103132204	AATGGGAGATGAAAGCAAGGAATTGCTTCCTGAAGACAATACTGTGGAAGCAAGATCACCTATCGATGATTTTTCCTCGTCCCTTCCAAATGGATGCATTCCCATAGGTCTGCAGGAATC	1	+	Chr2:1450129-1450248
Chr2:1554382-1554598	AJ_ArThaHiC20911103132211	CCTCCACTTCTTCACATCCTTGGCATTCGCTTCTTACATCTCCTCCTTACTTGTACTGCTTTGTTCTTCTCCTCTTTCTTCTTCCCAATCTCACTTCCTCATTCTTCAATACAATCATCA	1	-	Chr2:1554479-1554598
Chr2:1564263-1564497	AJ_ArThaHiC20911103132325	GGGATTGTGGGCTTTATCTTGGGGAGTTTCCATGGGAATTCTGAATCCCTTTCGCAGGGTAAAGCCATTAACATCATTGAACAAACGAAAGAAGTAGGGATCAAAGACTTGAAAGAAACA	1	+	Chr2:1564264-1564383
Chr2:1564497-1564696	AJ_ArThaHiC20911103132339	CAAGACCTCGCTATCATTAGAGTAGATGATCATCATGATGACGAAGAGATAAATGATAGTTTACTAAGTGTCGAAGATTTGAACAAGAAATGTGAGGATTTCATCAGGAAGATGAAAGCA	3	+	Chr2:1564534-1564653
Chr2:1564696-1564883	AJ_ArThaHiC20911103132350	CAAACCTCTACAATACACAAATTGAATCTAGTCCAATGATTCAATTTGTGTCATGTCTCATGTAGACGTTGTGATGCATAATATAACTGATATGCACAATTTACCCTTTGAACCACTCTC	3	+	Chr2:1564764-1564883
Chr2:1565030-1565246	AJ_ArThaHiC20911103132355	CAGATTAAATAGATTATCAGGGTTGTTATTAAGATCCAATCTTGAACTCTAAACACATTAGTAAAATTAACCAGCTCTGTTGTGATGACTATCTATGCCTAAATCTAAAATTCCAAGTCA	4	+	Chr2:1565079-1565198
Chr2:1689598-1689771	AJ_ArThaHiC20911103132460	TCTTGCTCTTGAAGATCTTGATGATGGGATAAAGAGTAATTCAATCTATTTCGTCGGCGAAGATGTTTGGCCAGATCATCAAGAACATGAGCATCGTGTTTCAAATTGCGGTTTCTTCGA	1	+	Chr2:1689623-1689742
Chr2:1695350-1695526	AJ_ArThaHiC20911103132466	CCTCTCGCTCTTAAAGATCTTGGTCACGGAATCAAGAGTGATTCAATCTATTTCGTCGACGACGAAGATGTTTGGCCAGATCATAAAGATTGGCCAGATTATAAAGATCATGTATCGAAT	1	+	Chr2:1695375-1695494
Chr2:1695678-1695918	AJ_ArThaHiC20911103132478	AAAATTATGATCTATGTGGTCTTTCTACTCTTACGTGAAAGTTATAGAGCAGTTCTGGTTATTTAAGGATCCCAGGATACAACCTCTATAAACTGGTTTTGCAACACTCGAAAACACAGT	3	+	Chr2:1695775-1695894
Chr2:1697885-1698045	AJ_ArThaHiC20911103132537	ATCTTGGTGATGGAATCAAGAGTGATTCAATCTATTTCGTCGATAAAGACGTCTGGCCAGATCATCAAGATCATGATCGTCGTGTTTCGAATTGCGGTGTCTTCAATATTGCCACAAGTA	1	+	Chr2:1697910-1698029
Chr2:1977198-1977410	AJ_ArThaHiC20911103133210	GGTGCTGAGTTTCAGACACGTTGGAATAGATCTCTTCTTCAAAAAAGATGAATTTAACCTACAGGATAATCTTTTATGATTGTTTTTTTTTTGTTTGCAGGCGTATTATGGCCTACCCCA	3	+	Chr2:1977247-1977366
Chr2:3312611-3312804	AJ_ArThaHiC20911103133884	AACCTCCCCAGAACTAAATCCGTTCGTTCGTTCTCTTCTTTCTTTTCATAGATTTAAGTCTGTTTGTGCATCTTTCTTTCTCCCATGCTTTCCGTCGGTCAAACCAACGATTCTCTTCTC	1	-	Chr2:3312685-3312804
Chr2:3484540-3484775	AJ_ArThaHiC20911103133963	ATATGGTATCAACTTCAAGACTGCAGACATGAACTCAAGATCCCACCAATCCCTTCTTCTTGTTATATGCGACGACCTACCGAAGACAAGAGATGATTAGCTCCTTTCTTATTGGATTGG	1	+	Chr2:3484601-3484720
Chr2:4020292-4020458	AJ_ArThaHiC20911103134103	TGTTCTTGTATGTTGGACAATGCCAATGTGCTATCGCTGAGTTGGATGCATTGGGTGATGAATTATACAAGGACAGTACCCTGATTATGAAGATTCTTAGAGACAATCTCACTTTCTGGA	1	+	Chr2:4020329-4020448
Chr2:4020458-4020622	AJ_ArThaHiC20911103134109	GTTCTGTAATTGACATGATTATAACTCTTTGGTCAATAGGACGAAGCAGGAGATGAGATCAAGGAGGCAGAACCAAAGGTCTTGTGCAAATGTCATTCTTGTTTCACTGTCTTGTCGGAA	1	+	Chr2:4020503-4020622
Chr2:5537621-5537815	AJ_ArThaHiC20911103134592	GCTTATTATTATTTTTGGGTGTCTTTGTCAATTTGCTTTTCCATTTTCATCTTCATGCATTGCTTTCCTTCGTCGTCCTTGGAGGGGACGACGACGGATCTGTCTTTCTGTCTACTGAAA	1	-	Chr2:5537660-5537779
Chr2:5537815-5538023	AJ_ArThaHiC20911103134599	GAACTTCCATAAGTCAATCTCTATAAACTCTGGAATTATACAGAAAAATAACAGAAACTAACCTAAAATAGTGAAAGAGAGTAGAGAGATCTAAAAATATCGCAAGAAGATCAATGAAAG	5	-	Chr2:5537880-5537999
Chr2:5540921-5541110	AJ_ArThaHiC20911103134650	ATTTACTTCTTCGTTTTCTCCGCTTGTTTGTGTCTATGATCTTGCCTATGAAACATCTTTTTATAGTACACATATATGTTGTCTTATTGGAAATATGATCGGCTAACATATTTGTTATTG	4	-	Chr2:5540955-5541074
Chr2:5694397-5694604	AJ_ArThaHiC20911103134852	TTCTTCTAATCTTCAGGGAAGGGGATCTGAAAGCTCTTCGCATCTAACGTGAGTTCTTCCTTTCGTAGAATTTTTACGTTCGATACTGTATATTGAATCGATTCAGCTTCCGTGAGATTT	2	+	Chr2:5694446-5694565
Chr2:5695219-5695453	AJ_ArThaHiC20911103134905	TAGGTCGGTTTTATGCATTTGAGAAAGCTCACAGGTTGGATCCAAGCTCTGGTGGTCGAGGTGTGAGGCAGTTTAAGACACTTCTCTTTCAAAGATTAGAAAGGGTAATCATCTCTTACT	1	+	Chr2:5695280-5695399
Chr2:5909422-5909625	AJ_ArThaHiC20911103134959	GTTCGTATAAACACTAGTGGATCTCCTCTAGAACGAAGCCCTGGTGTGTGTGTGTGTATCTCTTGTTTTCGAGTTTGTTCTGCTTCTCTTAGCTGATTTTGATTTTGACACAGAGACATT	1	+	Chr2:5909471-5909590
Chr2:5909625-5909794	AJ_ArThaHiC20911103134964	TGTTGAAAGGCACGGTGATTCGATCCGGGGCTGTGAAAATGTATGAGGGAGAAAAGATGTATCGATGTCGAAAATGCAAGCACATGTATGGTTATGTGTTGTGGTTGAAACTGTATATTA	1	+	Chr2:5909638-5909757
Chr2:5935305-5935480	AJ_ArThaHiC20911103134994	TCTTGAAAGGATTATTGTGGAACACGAAGAGAAAACGGACTATGATCATGGTATGGACCTGATGGATGTGCTGTTGGCTGTTTATCGAGATGGAAAGGCAGAGTATAAGATCACTAGGGA	1	-	Chr2:5935337-5935456
Chr2:6018947-6019105	AJ_ArThaHiC20911103135136	CCCAAGACATGTGTGTGTATATACAATTGTCACTAATGATAATGTCTCATCGTTACACACTTTTTGTCTCTCTCTCTTTTTTTTTTTGTCTAAGTATTAGTTTCTCGATAGGGTTATAGC	4	+	Chr2:6018972-6019091
Chr2:6173994-6174200	AJ_ArThaHiC20911103135343	CATAAACTTGATACTTGAGTGTCGCAGTTATCCCGAAGATGTCTATGATCGTGTTTGGATGCCATATTCACAACCGGAATGGACTCAAATAAACACAACCCGGAATGTAAGTGGCTTTTC	1	-	Chr2:6173995-6174114
Chr2:6359057-6359223	AJ_ArThaHiC20911103136146	TTGAGGGATCAAGATTTTGTCTGCATAAGGTATGTACAATTTGTCTCCAAGTTCTTATGCACATCTGTTTACTTGGGATTCGATCACTCGTGGTGCATCTGGCAATCGTAGTGTCTAGTT	1	+	Chr2:6359082-6359201
Chr2:6503947-6504117	AJ_ArThaHiC20911103136304	TGGTTTCTACTCCTATGAAAACATATTGAATGTCATGGTTATCTTATCGAAATCGGATGTTACAGGCGAACTCCGTGATCTTGGGATCCAAATGATTGCACTACCATCACTAGAGCATGT	1	-	Chr2:6503950-6504069
Chr2:6533316-6533486	AJ_ArThaHiC20911103136323	CATTATACCACCAAAGTCCACACACGAGTTCTCTATTTTTGTTTCATCCTCTTTTAGTCGCTGGTTTGGCCTCAATGAATAATGTAGTGGAGACTTTTACACAATGCGTACAACGTGAAG	1	+	Chr2:6533353-6533472
Chr2:6533859-6534017	AJ_ArThaHiC20911103136350	CGAGCTAGATCTTAGCTTTAGTTGCCTCCGTGGCCAGCTCAATTCCAATAGTAGTCTTTTTAGGCTTCCACAACTTCGTTTTCTAACCACTCTTGACCTTTCTAATAATGATTTTATTGG	1	+	Chr2:6533884-6534003
Chr2:6664728-6664884	AJ_ArThaHiC20911103136397	ATCTTCAAGATCCGTTTCGATCTCTCCAATCTGTTCGAGAAGTCATATCTTCGTAACTTCCTTTTGCTCGTGATGTTAGAGCAAAGATTAGGCCACATCAATTTGGGTGTGGTCAGTAGT	1	+	Chr2:6664741-6664860
Chr2:6664894-6665055	AJ_ArThaHiC20911103136403	CCCAATGGCTGATTGGTGGCGGTTCATCGGAATCTAGCGGTGGCCGGCGAACAGGCAGTGGTTTCGCGTGGCGTGTAGAAAACACGTATCAGCCACTAAATCATCTGCGTGTTTATTAAT	1	+	Chr2:6664931-6665050
Chr2:6688969-6689191	AJ_ArThaHiC20911103136518	CTAGCTAGGGACGGGCTTGGAAACAGATTAATTACTCTTGCTTCCGTGTTTCTCTACGCTATCTTGACTGAGAGAATCATTCTTGTTGACAACCGCAAGGATGTTAGTGATCTCTTATGT	1	-	Chr2:6689048-6689167
Chr2:6880250-6880401	AJ_ArThaHiC20911103136749	AATGTAGAAATGGGTATTTGTTGTTTCTGTGATTTAGGGTTTGTGGTTTAATGGGTCATTCGTCATTGGGGTTTATAAAGATCAAAACTTGGTTAAATTTGCAATTAGTTGTGAAAGAAA	4	-	Chr2:6880270-6880389
Chr2:7030711-7030874	AJ_ArThaHiC20911103137154	CGAGGCTACACCTCTGATATGTAACCCCAACACAGGAAGGTATACGATCTTACCTAAGTGCTATACTTATAGAAAGGCGTTTAGCTTTTTCGGGTTTGACCCAATTGACAAGCAGTACAA	1	-	Chr2:7030755-7030874
Chr2:7031030-7031229	AJ_ArThaHiC20911103137164	GGTTTCATTGCGTGTCAAAGCGGTGGGCATCAATGTTTGGTAGTCCATATTTCAAAGAGTTGTTCCTGACCAGATCCTCTGCTAAGCCACGCCTCTTATTTGCCATCGTACAAAACGGTG	1	-	Chr2:7031050-7031169
Chr2:7181670-7181826	AJ_ArThaHiC20911103137524	CTCCTCCTACTTCTCCTCTCCTTCACCATCCGAAGACAATTCTCATACCCCTTTTGATTACCACAACGACGAAGACGACGAAAAGCCTCGAGAAGAGTGCGGTGTCGTTGGAATCTATGG	1	-	Chr2:7181695-7181814
Chr2:7255890-7256091	AJ_ArThaHiC20911103137675	TACCTGGAAGAACAGATAACGAGATCAAGAACTACTGGAACACACATATAAAGAGGAAGCTTTTGAGCAAAGGGATTGATCCAGCCACTCATAGAGGGATCAACGAGGCAAAAATTTCTG	1	-	Chr2:7255936-7256055
Chr2:7256166-7256357	AJ_ArThaHiC20911103137684	TGTTGGCGATCTCTTCCTAGAGCCGCTGGTCTCCTTCGCTGCGGTAAAAGCTGCCGTCTTCGGTGGATTAACTATCTCCGACCTGATCTCAAAAGAGGAAACTTTACACATGATGAAGAT	1	-	Chr2:7256190-7256309
Chr2:7311127-7311361	AJ_ArThaHiC20911103138057	ACTTGGTGTTTGAATGAGCTCCTGGAGATTTTGAAGTGCAGGGAAGATATTGGGCAAATTGTGATGACTGTATTCTACGGAGTAGATCCATCTGATGTCCGCAAACAAACCGGTGAATTT	1	-	Chr2:7311194-7311313
Chr2:7339195-7339379	AJ_ArThaHiC20911103138159	TTACCTTATGCAATTTTGGTTTTTATAATAATCAGATAGATACAAAAAAAAAAAAAGAACCTGAATCCGGCGACTTGGTAAGCAGATCCAACGGCTGAGATTCGGTGAGTGGCCTGGTGG	2	-	Chr2:7339212-7339331
Chr2:7377088-7377289	AJ_ArThaHiC20911103138415	TATCATACTAAAATGGAGTTTAAACGGTTTGGAAAACCCAATAAATGATATCAGAGTCTAGATTGAAAAAAATAGACTTAGAATTCTAGACTATATAATCGGTGTGAGAGAACCCTCTAT	4	+	Chr2:7377170-7377289
Chr2:7433402-7433566	AJ_ArThaHiC20911103138764	TGAAGGTTACACAAGCTGAAGACAACAACGATGACACTTTGGCTGTCTTTGGAGAAGCAGAAGCTATTACACTTTCTCTGTTTGATTCTCTCCTTAGCTACATGTCTGGATCAAAGACTT	1	-	Chr2:7433423-7433542
Chr2:7433566-7433753	AJ_ArThaHiC20911103138768	TGAACAGCTTCTTGATGGATCCCTCAGGATCTTGGATTTGTGCAACATTTCCAAGGATGCTTTGTCAGAGATGAAAGAGGGTCTCATGGAGATCCAATCAATTCTAAGAAGAAAGCGTGG	1	-	Chr2:7433622-7433741
Chr2:7433857-7434022	AJ_ArThaHiC20911103138776	ACAAAACAAAGCAAAAAATGGCAGTCTCCTTCCACGTTCGATCTAACAGCTTCCCCTCAAGATCTCACCCACAAGCTGCTCATGTGGATGAGCAGTTGGCCCGTTTGAGATCTTCCGAGC	1	-	Chr2:7433879-7433998
Chr2:7434091-7434332	AJ_ArThaHiC20911103138784	CTTGATCTTAATGAAGTGTTGAGCTGTGATGATGGTTAGAGAGAGACATAGAACTGATATAACGGAGATCTTGATCCATTAGTTTTATATTACATGAGATGCCTCTTGTCACCTAGTAAA	3	-	Chr2:7434153-7434272
Chr2:7436128-7436346	AJ_ArThaHiC20911103138793	TATATGCCTTCTCGTGTGGTCTCTAAAATGTCATAATTGTTTTAATGGATGTGGAAGGATGGTGATGCATGTCTTTCTTGTTTCGGCTTGATGAAGGAGATTAATAATGATCAAATTACA	3	-	Chr2:7436203-7436322
Chr2:7517250-7517466	AJ_ArThaHiC20911103138909	TATTAAAGGAGCTTATGAGGATCCTTTGTATGTTCACATTGTGATGGAGCTTTGTGCTGGTGGTGAGTTGTTTGATAGGATTATTCATAGAGGTCATTACAGCGAGAGGAAAGCTGCTGA	1	+	Chr2:7517311-7517430
Chr2:7564562-7564748	AJ_ArThaHiC20911103139107	AAACAATCGGAGAGATTTGGAACTACGATCTTCACGGAAACTGTTAACAAAGTTGATTTCTCATCGAAACCGTTTAAGCTATTCACTGATTCGAGAACTGTTCTCGCTGATTCTGTAATC	3	+	Chr2:7564587-7564706
Chr2:7564882-7565035	AJ_ArThaHiC20911103139114	GGTTTATATTATTCATAGGAGGGATACGTTTAGGGCGTCTAAGATTATGCAGCAGAGAGCTTTGTCTAACCCTAAGATTGAAGTGATTTGGAACTCTGCCGTGGTTGAGGCGTATGGTGA	1	+	Chr2:7564907-7565026
Chr2:7565035-7565223	AJ_ArThaHiC20911103139116	ACGTGTTCTTGGAGGATTGAAGGTGAAGAATGTTGTTACTGGGGATGTTTCAGATCTGAAGGTGTCTGGATTGTTCTTTGCTATTGGTCATGAGCCAGCTACGAAGTTTTTGGATGGGCA	1	+	Chr2:7565036-7565155
Chr2:7568767-7568970	AJ_ArThaHiC20911103139308	CTTCTGTTCTGTGGTGCAGATCATTCAAGACTTAGGCTCACTCATGAGACTTCTTTTGTGAGAGAACATACAAGTTTCTGGACAACAACTCCTTTCTTCTTTTACGTCGTAAAGAAACCA	1	+	Chr2:7568816-7568935
Chr2:7669303-7669538	AJ_ArThaHiC20911103139322	AGGCATTTAAAGATCGTGATCCTGCTTGTCTGTCGTATAGTTCTGCTATTTTACATCTGAAGGTAATTCTTTACTCGAAGTTGAGAGACAGAACATTTCTCACATGGAATGAGTGACTTA	3	-	Chr2:7669304-7669423
Chr2:7670417-7670607	AJ_ArThaHiC20911103139372	CAAGTTGGCATAATTTATGGTGGATCTATCTTCCTTGTACAATATTCATATTCCCCCTCTCGAGGTATACGATTAAGAACTATAGTAATCTTATAAAAAATATTATTCGATCCCTCTTTG	4	-	Chr2:7670464-7670583
Chr2:7726698-7726933	AJ_ArThaHiC20911103139382	GCTTCGTTTTAGGTCTCAAAATTTGAGTTTTTGAGCTGTTTTTGGTTAGGAAGAGAAATGGCTAATTCATGGGATCAGTTAGGAGAAATTGCGTCAGTGGCTCAGCTTACAGGCATAGAC	1	-	Chr2:7726754-7726873
Chr2:7726933-7727140	AJ_ArThaHiC20911103139392	ATTTTTTTCTCCGATGAGTTTACACTTAAACAGATAAAATTTTCACTTTAAGAAAAAAATTCTTAAAATGTTCTCTGTTTTGAAGATCTTTAACGTAGTAGAGAATTTTATTGTCGCAGT	6	-	Chr2:7726973-7727092
Chr2:7728395-7728634	AJ_ArThaHiC20911103139540	TTTTGCATCTTTGAATCAGTGCAGGTGTGCACCATGCTTGATCTTAACGCCTTTGAACTGAACCAAATCTCTGATCTCTTTGATTGTTCCCAAATTCAAGTAACAAAATAGACAAATTGT	3	-	Chr2:7728455-7728574
Chr2:7828895-7829106	AJ_ArThaHiC20911103139754	GATGCGTCTATGCGGAAGCTACGCATTTTCGGAATTGATGATCGCGAAGATGAGGTATTGTTTTCTATTGTCGATAAACCCTAAAAAAAATGCCACCTTTGATTGTTTCTCCGATGATTG	1	+	Chr2:7828932-7829051
Chr2:7829407-7829593	AJ_ArThaHiC20911103139780	GAGCTACGAATGAGGATCTTGGTGTGGTTATCAAGCGGGTTATCTTCCATTTGCATCCAAGTTTTAATAATCCAACTAGAGTGGTTGATGCTCCTCCCTTTGCATTGTCTGAGTGTGGTT	1	+	Chr2:7829444-7829563
Chr2:7852642-7852799	AJ_ArThaHiC20911103139837	GTGTCTATCGATCCTTCAGATCTTGCGGCTTACCTCCTCGAAATGATCGGTAAGTCAGTCGATGCATGCGATGTGTAACTCTCATCTAGATGGATAATCCATAAATCAAAATTCATTTTT	1	+	Chr2:7852655-7852774
Chr2:7852834-7853081	AJ_ArThaHiC20911103139846	AGTACAATTTCCATGGCTGAAGTTGTTCAAAGAGTCTCCTTTGCGAAAGCTGATCGATGTTCCTTTATCTCATATTCCTGAACTTGTCTACAAAACATCAGTCCATTGGTTCGACGACCA	1	+	Chr2:7852895-7853014
Chr2:7853081-7853239	AJ_ArThaHiC20911103139853	TGAGGTGCCAAAGGTTGAGAGGATCCGGTAATTTTGGAATTCAAATTCATGATCTATGTTTTTGCTAGGCAGCATTTTTACCTATATGTCTTTTGTTAGCTAACTGACTAACTCCATTAT	3	+	Chr2:7853082-7853201
Chr2:7853268-7853499	AJ_ArThaHiC20911103139863	GTATTACCGACACTGAGGGAGAACGTAAGTATCATGATCCCTAAACCTAATGCTTTGGCTATTATATTAATCAAGGACAAAACAAGCTTCCGCTTATAGTTTGGATGACCGCTCAGGTTT	1	+	Chr2:7853329-7853448
Chr2:7888530-7888728	AJ_ArThaHiC20911103139968	GAGCTTTCTCATTCTTCTGTCTCTCACTTACGCTCTTACTCTCTGCATCTGTGACAACGCGAGTAACTTTGGCGGCAACAAAAGGAACCTCTTCCCAGATTTCTACAGGAGCTCGTGCCC	1	-	Chr2:7888609-7888728
Chr2:7888728-7888897	AJ_ArThaHiC20911103139981	ACTTAATTGATTAATTCCAATCAAGGTACCAAGTCGATTCTTCTTCTCTTATCATCACAAAGTCATCTCCTTTCTTATTTCTTGATCTAGCTAGCGACAATTGAAAATGGCAAGAATCGG	3	-	Chr2:7888729-7888848
Chr2:7892909-7893140	AJ_ArThaHiC20911103140004	CTCGCGGGTTTGAAGTTGTTGACGAGATCAAGGCAGCATTAGAGAACGAATGCCCTAACACTGTTTCTTGTGCTGATGCCTTAACTCTAGCCGCTAGAGACTCCTCTGTTCTTGTAAGTC	1	-	Chr2:7892913-7893032
Chr2:7893234-7893433	AJ_ArThaHiC20911103140006	CTTTCTCATTATTCTTTACCTCATTTACGCTCTTACTCTCTGCATCTGCGACGACGACGAGAGTAACTATGGCGGCGACAAAGGGAACCTCTTCCCAGGTTTCTACAGAAGCTCGTGCCC	1	-	Chr2:7893314-7893433
Chr2:7893433-7893607	AJ_ArThaHiC20911103140014	CAACTCTATTGCCTTGCTTTTTCCTCTTCATGACGCTATAATCCACGAACCCTCTGGCCTATATATACTTTCGATTCTTCTTCTAATCCTTCATATCTCCTACCATCACAAAGTCATCTC	1	-	Chr2:7893488-7893607
Chr2:7913246-7913458	AJ_ArThaHiC20911103140073	ATGTGTTTTGGAGAGACCCAATGTGTGTTCTTTTAAAAAGAGGAGTTGCTCCAAGTTGAGTTGTTCCTTGACGAAGAAGAGAAGAAGTAGCAAGGTGATGTCCGTGGAGATCTTCGAGGA	1	-	Chr2:7913315-7913434
Chr2:7915352-7915527	AJ_ArThaHiC20911103140145	GGCAGAGGTGTACCTCCGGAACAAAATCGGACCCGAGACAGCCCGTTTACGAGTAGGTAAACTCCCTAAGCAGAAGCACTTCACAATCTATATCGAGAAAGGAGAAGAGATCTTGGATAC	1	-	Chr2:7915384-7915503
Chr2:7921836-7922037	AJ_ArThaHiC20911103140293	CATGCCAATGGCTCGTCCACTTTCTTTACAGGTATTCTCTTTCCTTTTTATGTATCTATATAGTATAATCGACCATAATTTTCATGTATCTATGTAGTTTTAGTCTCAAATTGACTCTAT	4	-	Chr2:7921906-7922025
Chr2:7940096-7940254	AJ_ArThaHiC20911103140725	TCGGATCGTAGTGGGAGTCTGTGATGGCCCAATGTTGACGAAAAAGCAAGTAAGTGATAGTGATCACACTTTCAGTCTCTTGTAGATTTGTTTCCCTTTTTGGTTAGATTAGTAGCAATA	1	+	Chr2:7940121-7940240
Chr2:7940317-7940501	AJ_ArThaHiC20911103140732	GATCAAGAGGCAAAAGAGGACCCTTTGAACATCTTTGTTCTGATGTTGTTTTGTGGGGTTTAAAGCTCAAAGTCTGAAACTGTTATGCTTTGTTGATGAGCTCTTTCCAAGTCTCATGTC	1	+	Chr2:7940366-7940485
Chr2:7940501-7940722	AJ_ArThaHiC20911103140739	CACTTTGGTTGATTTCGAGTTGGAATGATATTCCTATGATCAAGAGGCAAAAGAACAAACACCCTTTGAACATCATTTTTCTCTGATTTAAAACTATTGCTTTGTTGCAGTTCTCATCCT	3	+	Chr2:7940550-7940669
Chr2:7971514-7971707	AJ_ArThaHiC20911103140860	CCAACAAAGAGAAACCCACCACCAAAAGAAACGGGTCGGACCCGGATCCGGATCCGGATCTTGATACTAACCCAATTTCTATATCTCATGCTCCAAGATCATACGCTAGGCCTCAAACTA	1	-	Chr2:7971552-7971671
Chr2:7978428-7978605	AJ_ArThaHiC20911103140913	GAGTGGTTAAAACATGCTACAATGTTTTGCGAGTTTTGGTGTGTCGGTTTTCCTAAAACCATGGTCTTGGAAATTACTCCCATACCGCGAGTTCAAGATCACATTTAACACTCCTCTTTT	1	-	Chr2:7978450-7978569
Chr2:7978605-7978783	AJ_ArThaHiC20911103140918	ATCGATCACCAGCGTTTCAAGCCCACTGTTTAGTCAAGTCTCTTCGTATCCTCGGTATCGAAAAGTTTACTCTTGTAGGGTTTAGTTACGGTGGCATGGTTGCTTTCAAGATCGCCGAGG	1	-	Chr2:7978640-7978759
Chr2:7979107-7979287	AJ_ArThaHiC20911103140924	GTAAAACAATAAATGCTTGGTTGAATATAAACAAGAACCCAACACCAGATACATTATAATTAATCCCAACTCAAGAAGCTTTAAAATCTTCACCTTCCATTTGCTATTGATCATCTTCTT	4	-	Chr2:7979144-7979263
Chr2:7980465-7980709	AJ_ArThaHiC20911103141025	GATGAATGTATTGAAATGTCTAGCGATCATTTCCGTTCTCGGAATATTCTTCATACCTCGTTATTCTGAATCCGCTATATCTTGCAGTGTTGTGTTACAGGATTTGCAGCCATGTGTGAG	1	+	Chr2:7980550-7980669
Chr2:8011203-8011382	AJ_ArThaHiC20911103141265	AAATTCATATCTTGCAGAAATATAATTCTCGTACCAGAATACGTGGGCACCCACAAACACTGTGGAACAACAGTAGAAGTTTTTGATCGTCATTGTTCCACTATGGATGCAAGTGGTGGA	1	-	Chr2:8011215-8011334
Chr2:8027164-8027335	AJ_ArThaHiC20911103141422	CGTTGGATGTTGATCTGAGAAACTCACCGGTGTTATCTCCGCCGCAAACGCCGACGTTTCAGTGGGAAAGTGAAGGGAAGTGGCACGTGATTGCTCAAGTCACTGAAGAAGAATACGAAA	1	+	Chr2:8027189-8027308
Chr2:8027828-8027999	AJ_ArThaHiC20911103141445	GCTTTGTTCTCCGGTGGTAGTGGTGGTGGTCGGAGATCGTCCTCCTTCTCGAGTGTTCGACTCTCAGACTACGATGAGTGTTAAAATAATAATGTTAAAAATTAAAATCCTCTGTTTATG	1	+	Chr2:8027829-8027948
Chr2:8050449-8050678	AJ_ArThaHiC20911103141494	AAGAGAAAATTGAGTGATGAGCAAGTAAGAATGTTGGAGATTAGCTTTGAAGACGATCATAAGCTTGAATCCGAGAGGAAAGATCGGCTTGCTTCTGAGTTAGGGCTTGATCCTCGTCAA	1	-	Chr2:8050535-8050654
Chr2:8070294-8070509	AJ_ArThaHiC20911103141582	TTTATTTGCCATCAGTTATGATCGTCCCACAGTTTTTGCGTTCGGAAGTTTCTTTTGGGTCTCATCAACTGTTGCAACTGGAGTCAGCCGCTACTTCATCCAGGTTTTTTTCCATTAATT	1	+	Chr2:8070355-8070474
Chr2:8074185-8074403	AJ_ArThaHiC20911103141681	GAAGCAAAGAGAAGAGTCTCAAAGTAACAACGGAAGAGGAGCTTCTACTGTCAAGAAGCAATCTGCTGGTGAACTTCGTCTTCACAAAGGTTCTCTTTCTCTTCCTTCTCTCTGTTTTTT	1	-	Chr2:8074284-8074403
Chr2:8084124-8084364	AJ_ArThaHiC20911103141835	TTAGCGATTCAAGCGGCTTGTGCAGTTGAAATGATTCACACAATGTCACTCATCAAAGACGATCTTCCTTGTATGGACAACGACGATCTCCGACGAGGGAAACCAACAACACATAAAGTC	1	-	Chr2:8084197-8084316
Chr2:8084388-8084614	AJ_ArThaHiC20911103141843	ATCTCCGGTCGCCGCTGCTATTTTCGCTAGAAAAGACACCCGTGAGTTTCTTGATTCATCAATCAAATTAGTAAACGAAGAAGACGATTTCGGTTTCAGTTTCGATTTCAAACCGTACAT	1	-	Chr2:8084483-8084602
Chr2:8094693-8094868	AJ_ArThaHiC20911103141953	TGCCATCAAACCCGAGATAACAAACTTGATCCTTGAATCAAGTTTGTTACCTATGACAGATCCAAACACCCCGGAATTTGCTGCCCATCTTATGAGAGTCTTTGTAGATTTTCGCCAGTT	1	+	Chr2:8094706-8094825
Chr2:8094899-8095069	AJ_ArThaHiC20911103141961	CAAAGATTTTCCGATTCTGACGCTTAAATATTGGAAGGGACCTCTTGTGACCAATTTCTATATTGTTCTCTTCAGTCTTGGCTATTGGTTCCTATTCTTTATAGTCCTATTTTCTATCGT	3	+	Chr2:8094936-8095055
Chr2:8097574-8097816	AJ_ArThaHiC20911103142118	TCCCTCTCTTACTCAATTGTTTAGTTTACTTCTTGAACATCTTTGTCATCGTACCGGAGATCACAAACTTGATCCTTGAAGCAAGTTTGTTGCCTTCGACAGATCCAACCTCCCCGGAAT	1	+	Chr2:8097623-8097742
Chr2:8221641-8221799	AJ_ArThaHiC20911103142428	ACGACAGAGAGGGGCGTCGTTTTGTTGATTTCTTCTGGGTGAAGATGTCAGGTCTCGAAGATATCAAGAACGAGACCGTTGATCTGGTATTATTTCGATTCTCTTCTCGCTTAAATTCTT	1	+	Chr2:8221678-8221797
Chr2:8229303-8229454	AJ_ArThaHiC20911103142614	TCACATGGAGAGGCAAATTATAAACAAGAGAAAGCGAGTCTTTTCTCTCCAACCAAACAAGAACCCTAAGGCAGTTTTCGCAAGAAGATACGTGAGTCACTTGGTTCCAGCTCTTAAAAA	1	+	Chr2:8229316-8229435
Chr2:8229726-8229909	AJ_ArThaHiC20911103142652	ATGATTCATGAGATCTTTTTCTTTATTAGCAAACAAAAAAACGAAAGAAAGAATCACATACGTTTGTTGATCTAGTTTCTTAATATTTTACTTGACGGTTGCAAATCTTTAATGAACAAA	5	+	Chr2:8229763-8229882
Chr2:8234435-8234603	AJ_ArThaHiC20911103142660	AAAAAAAGTATATATTGTTTGACTATTTAACGTTATATACAGGGATGTGATGCTTCGATATTGCTGGCATCACCATCTGAGAAGGATCACCCTGATGACAAGTCACTAGCCGGAGACGGG	1	-	Chr2:8234436-8234555
Chr2:8238806-8239050	AJ_ArThaHiC20911103142753	GATTTAGTGGATGATCAATGTTGTTGTTGATGATAGGTTGGGTTCAATGAGCTTGGAGGGAAAGATGATTTCAGCACTGAGGATTTGGAAGAGAGAATAGCTAGAGCGCAAGTGATTCAT	1	-	Chr2:8238811-8238930
Chr2:8239050-8239215	AJ_ArThaHiC20911103142757	ACGGTTTTTGGATGATTTGGTGATTTGTGAATGATTGATGTTTGTGTAGGTGATGGATAAGCACATGAGTATATTGGCAAAGCAACACATTGAGACACGTTTTGTGAAGATCCAAGCTGA	3	-	Chr2:8239072-8239191
Chr2:8239750-8239996	AJ_ArThaHiC20911103142777	GGGCCTCGTTAATAATCGATTGGGCCAAACTTCTTAATATTTTTTAAGTCACGTGGAATGTCACGTGCTAATCATCTTCTTCATAGAAACCAAAAACCTAATCTGCAAGATCTAAACCAA	3	-	Chr2:8239853-8239972
Chr2:8261324-8261487	AJ_ArThaHiC20911103143797	GCCGCAAGTAAACTATAAAAACCCTATCGAAACGATTCCTCTATTTTTAGCTCAGGTAACCAAATTCAAATGCGGTGGAATAAGCCTTAGCGTCAACGTTTCCCACGCGATCGTAGATGG	1	-	Chr2:8261344-8261463
Chr2:8278746-8278913	AJ_ArThaHiC20911103143841	TTATCTGATCGCACCAAACCAGTTTTTTCGCATCGGCTTCTTCCTTTTGCTACTAGCTCTCCTCTCTTCTCCGGTATTTTTGTCTCTCTTCTTAATTCACACAGATTTCATGATAAGTGA	1	+	Chr2:8278771-8278890
Chr2:8279028-8279244	AJ_ArThaHiC20911103143847	TTTTTCTTTAGGAAAAAAAAGAGAGTGAAGATATTTTTTGGCTTGATCTCAACATTATTTTTTCTTAAAAGTAAACATTTTCAATAAGAAAATACAAGACCCATACCGAAAGTTTCTTCT	6	+	Chr2:8279065-8279184
Chr2:8305302-8305546	AJ_ArThaHiC20911103144095	ATATACATGCAAGGCGGAGGAATTGAAAAGACGATAATAGCTTACGGTGATCATCAACTCACCAATACTAGCGCCACTTTCACGTCCTATCCTAGCAATATCATCATTACTGGAATCACC	1	+	Chr2:8305363-8305482
Chr2:8550754-8550946	AJ_ArThaHiC20911103144422	GTTTCTTTGCTCATTCGCCGGATCAGATTAGGGTTTTGCCTAATCAAAGCCCTGATCGTGTTGATTCGTTCGACGTTTTGTCTCCTACGATTCGTAGAGCGTTTCAGTTTTCGATTTCTC	1	+	Chr2:8550791-8550910
Chr2:8550979-8551226	AJ_ArThaHiC20911103144430	GCAACTTAATAAAGTGAAGTCTTCTCTTTCGTCGTCATACAACAATCAAATCGGAGGATACGGATCCGGATTCGGGTCGCCTCGTGGATCGGTTTTGGGTCCTGGTTTCCGTAGCTTACC	1	+	Chr2:8551028-8551147
Chr2:8551250-8551435	AJ_ArThaHiC20911103144443	GGGAGCGGGTGATACTCCTGATGTCGGGTGGGTCTCTGACTTGGTTATGTGATTTGAACCGGATTCGTAAACCGGAGTGTCTGAAATTTCGTTGATAAAGATTAATTAAAGGATTATTAT	1	+	Chr2:8551311-8551430
Chr2:8586846-8587016	AJ_ArThaHiC20911103144514	CAGGTTTCATCTGATTGATCTGTCATTGTACGTAGACCAACAGATTTAATCAATCTGTCATATACTAAACTAATGGTTTTTTGAAACCTCGCAGAAACAAATGTATTCTGGGACGTCGAG	3	+	Chr2:8586883-8587002
Chr2:8678451-8678618	AJ_ArThaHiC20911103144804	TATAAAGTTTCTTTCTCTTTTTTTTTTCTTTCTCATGTATACATAATCTACTTATATTATTTCATATAAACAAACATGATCTAATATGGATTGTCTTTGAATGAAGGGGTGGATTGATGA	6	+	Chr2:8678488-8678607
Chr2:8698078-8698265	AJ_ArThaHiC20911103144902	GCAGAGTATCCGCAGATCTGAAAGTATTACGATGGAGCGGATTGTTTCGTTCACCCTAGAGGAAGTGCCGGAGAGCATTGCCAAGCTAGAAGACAAACTCTTCTCCTATCTTTTGGACCT	1	+	Chr2:8698115-8698234
Chr2:8698265-8698487	AJ_ArThaHiC20911103144907	AGAGGTTGGATTTGGGGTTCTCAAAGCAATTGATGACCAAACTATCCAAGACAGATTGCACTGGTAGAAAAGGTGATCAAGGCTTTCAGGAGAGGTGTTACAGAGCATGCAAACTGGATC	1	+	Chr2:8698278-8698397
Chr2:8855694-8855916	AJ_ArThaHiC20911103145054	TATGACGGTGACAGTGACCGGAAAAGGAAGTATTCCTCTTCAGCTTCTTCCAAGAACAATCGGATCAGTAACAACGAAGGGAAGAGAAAGGTGAAGGTAATGATTTTAATCATATCATCT	1	+	Chr2:8855719-8855838
Chr2:8858997-8859193	AJ_ArThaHiC20911103145144	TTTTACAAGGGGTTCCTTAGATTGATCTGTTACTGTAGAGATGGCTCCAACTCAGGATCCCAACAGTGTCGGAGGCGGTGCGAAGAAAGATGAAGCTACCTTGAAGGTTCCGTCTAAGGA	1	+	Chr2:8859034-8859153
Chr2:8859467-8859704	AJ_ArThaHiC20911103145154	ACTAAAGCAGAACCTTGAGCTCTATGTTGAGAGGGTTCAGGATCCTAATCCGGAATTGCAGAAGGCTGCCCTTGAGAGCATGAGGTAATTCTTGACTTGATCAGCTTCGGGTTTTCAGAT	1	+	Chr2:8859528-8859647
Chr2:8859762-8859999	AJ_ArThaHiC20911103145160	GAGCTTCAACAAGTTCCATGACTTCAGTTCCCAAACCACTAAAGTTTCTGCGTCCCCATTATGGAACTCTTAAAGCGTTTCATGAAACAATGGCTGATTCTGATCTCAAAGTATGTCATC	1	+	Chr2:8859763-8859882
Chr2:8983437-8983648	AJ_ArThaHiC20911103145434	CATTTCATATGTTCGATCTTGTTTTCATGTGACTCTCTCCTCTTCTCTACCGTGAGTCTCTTCAATTTCCTAACCCTTTGTTAACGATCATATATACCTTGTTTCTCGCCGTACTATTTC	3	-	Chr2:8983481-8983600
Chr2:8987667-8987838	AJ_ArThaHiC20911103145909	CAATCGGACAAGATCTCCAATTTCGCATCTTCTCGTCCTCTCGCCTCCGCAATTCGCATCTGCACAAAGTTTTCTCGCCTTTCTTTGAATTCGCGTTCCACTTCGAAATCTCTTATTCAC	1	+	Chr2:8987692-8987811
Chr2:9106807-9106994	AJ_ArThaHiC20911103145996	TTGGAATCTTACTTGGAAATTATGTCTTAAGATTTGGGTTTTTAAGTATTTGGAAATTTGGAATCGTAGAATGATCTTAAGTCTTTGCTGTATCACAGACAATTGTTTTTGTTTCTTTGC	5	-	Chr2:9106815-9106934
Chr2:9227113-9227340	AJ_ArThaHiC20911103146543	GGGTCTTGGTATGGACATGAAACTTCCTTGGGATCTACCTTCAGAGTATCAGTTTTTCCAAGATGTTACAACTAGGACATCCGATCCCACGAAGAGGAACGCGACTATAATGGGAAGAAA	1	+	Chr2:9227174-9227293
Chr2:9280059-9280268	AJ_ArThaHiC20911103146972	TGGTGAGAACGATGTAACAGTGAAGATCTTGTTCTGTGGTGTTTGTCACTCTGATCTTCATACCATCAAGAACCATTGGGGATTCTCTCGTTACCCCATTATTCCCGGGTATTCTCATTA	1	+	Chr2:9280108-9280227
Chr2:9280813-9281056	AJ_ArThaHiC20911103147016	GAGTTACTGTGATTAGTAGGTCATCAGAAAAAGAGAGAGAAGCAATTGATCGGCTTGGTGCTGATTCGTTTCTTGTTACAACGGATTCTCAAAAGATGAAGGAAGCGGTTGGAACTATGG	1	+	Chr2:9280874-9280993
Chr2:9322371-9322586	AJ_ArThaHiC20911103147069	CCTAAATTTCGTCAACTCCACAGCGACTCGATTCGATCAAGGAAATGGCGTACGCTTCTCGTTTTCTCTCCAGATCTAAGCAGGTATATACTCTCTCTCCCTCGATTTTTCTGATTCTCT	1	-	Chr2:9322407-9322526
Chr2:9322681-9322867	AJ_ArThaHiC20911103147073	CTCACCTTGTCTCATTTGGCAAATATTTCCTATAGGTTCAACTTATTAGTAGAAATGACAATGTCTTGGCTGACACTTATCAAGAACTCTCCTTGTAATCACTTAGTTACTTCCATTATG	3	-	Chr2:9322748-9322867
Chr2:9331094-9331294	AJ_ArThaHiC20911103147210	AAATGGTGAGAACGATGTAACAGTGAAGATCTTGTTCTGTGGTGTTTGTCACTCTGATCTTCATACCATCAAGAACCATTGGGGATTCTCTCGTTACCCCATTATTCCCGGGTATTCTCA	1	+	Chr2:9331131-9331250
Chr2:9331836-9332079	AJ_ArThaHiC20911103147254	GAGTTACTGTGATTAGTAGGTCATCAGAGAAAGAGAGAGAAGCAATTGATCGACTCGGTGCTGATTCGTTTCTTGTTACAACGGATTCTCAAAAGATGAAGGAAGCAGTTGGAACTATGG	1	+	Chr2:9331897-9332016
Chr2:9346623-9346793	AJ_ArThaHiC20911103147366	ATTTTGTTACGCCATTGGTGGCATACAAAGACAATTAGGGTTCTCTATTATCATCCAAAGAAAAACACAGTGAAAATAGTATACATAGACGGCGTCAAAGAAATGAAGGATCCACTTTGG	3	-	Chr2:9346650-9346769
Chr2:9436232-9436397	AJ_ArThaHiC20911103147909	CATTTTACATTTTGATTAATATCCTAAAATGGGTAATTTCTTGTTTCTTGCAATGGTCACTTACATATGTCTATCTTTAAAACACACACAAAATTATATACGTGTTACTGATCTGTTATC	5	-	Chr2:9436254-9436373
Chr2:9576735-9576981	AJ_ArThaHiC20911103148055	AATTTTGATTTTGATCTTTGTGAGAGAGTGTTTTTGAGGATGTTAAAGCGATGCTAGTTTAGGTTATTGATGGGCTACCTGCGGAGTTCGTTCTTGGGAAAGATGGTAAACCTCCAGAGA	1	-	Chr2:9576742-9576861
Chr2:9577030-9577210	AJ_ArThaHiC20911103148059	CTCCGGCGTCAGGTACTACTAAATCAATAACATTTGAAGTCGAAGAAGAAGAATCTACGCTCTATTGATTTGTTTATTTGAAATGGCAGTGGCTCGGAGAGCTATCGAGATCCATTCTGT	1	-	Chr2:9577067-9577186
Chr2:9577210-9577447	AJ_ArThaHiC20911103148068	TATTGGGCTTTTATTAGGCCCAAATTTTCCTTACGAGTAAAATAAGTATTATTTTGGTTCAGTTTCTCGCCGGATCCTGAAAATGACGACGGCGGCGATGACTTGTACGAGACTGACGAT	1	-	Chr2:9577268-9577387
Chr2:9580445-9580666	AJ_ArThaHiC20911103148236	GAGTTCTGTAGCTCCAGGTCTTTCTTTCTCTCTCTAACTTCCCTCTCTATAGATTTCTCATAACTCATCGAAGGAATCTTGTCTAGATCCAGACAAAAAACTTTAAAGAGTTTTTAGATG	3	+	Chr2:9580446-9580565
Chr2:9618400-9618581	AJ_ArThaHiC20911103148284	GACTTTGCCAGCTCCAGGTTTCTCTCTTCCTTTATTCAATTCTTAGATCTTTTAACATCTACATACCTATAGATCTACATCTATCTATGTATTTGTATATCTATAATAAATGGAACTATA	5	+	Chr2:9618401-9618520
Chr2:9623685-9623857	AJ_ArThaHiC20911103148501	AATGAGAAGTTGGATCTGTTGGAACGTCGCTTGGAAATGCTGGAGGTGCAAGTAAGTACCGCGACAGCAAATCCTTCTCTGTTTGCGACGTGAAACACCGTAGACGATATCGAAATCGAA	1	+	Chr2:9623710-9623829
Chr2:9678619-9678779	AJ_ArThaHiC20911103148617	ATCAAGCATTACCAGAAATCGAAGCGAAAATTTCTCAAAATGACATTCTCATCCGAATCCTTTGCGAGAAAAGCAAAGGGTGCATGATCAACATACTAAACACAATTGAAAACTTTCAAT	3	+	Chr2:9678644-9678763
Chr2:9684659-9684886	AJ_ArThaHiC20911103148624	AAAGAGTTCTTGTAATGGATGATTCAAGCTTTATGGATTTGATGATCGACACTGACGAGTATCTGATCGATGACTGGGAATCCGATTTCCCGATATGCGGGGAAACTAACACCAACCCCG	1	+	Chr2:9684708-9684827
Chr2:9753664-9753857	AJ_ArThaHiC20911103148940	AAATTAAAGATCCTTGTTTCCTAAGATGACTCGATCTTTAGAAACTAAGAGAGAATGAAACTAACACTAAAATTCCTACAAAAAAAAAATGAAATCAACACCAAAATTGCTGCTTTTACT	5	+	Chr2:9753713-9753832
Chr2:9803069-9803233	AJ_ArThaHiC20911103149459	TTGGTCTATATTTTGATGTTATCTTTCAATCTCTTTTATATATATAAAGAATGACTCATCTATCAAAAAATCAGAGTGGCGCAGCGGAAGCGTGGTGGGCCCATAACCCACAGGTCCCAG	1	-	Chr2:9803102-9803221
Chr2:9844493-9844652	AJ_ArThaHiC20911103150018	ATCTCTCCGCCCGCTCCTTCACCGGAGGCTGATACTCCTTCAGCTCCGGAGATTGCACCTTCAGCTGATGTTCCGGCTCCAGCTCTGACAAAACATAAGAAGAAGACAAAGAAGCATAAG	1	+	Chr2:9844518-9844637
Chr2:9844652-9844878	AJ_ArThaHiC20911103150025	CCTGGTCCTGGACCAAGCGATGCTTTCTCTCCTGCCGCTGACGATCAGGTAAATAATATATGATTTAACCTAAACAATATGGTAAATTAATTTAGGTAATATGTAAAAATATCACTTAAG	3	+	Chr2:9844701-9844820
Chr2:9895936-9896128	AJ_ArThaHiC20911103150086	ATCCATAAAATTGATATTATGTGATCTTAAAAACGTTGTTCCATTCCATGAAGGTGCAAGATGATGAGCGAAGCATCTGGTGGGGATCAAGAGCACAACACGTGTCCATGTGGGGAGCAC	1	-	Chr2:9895961-9896080
Chr2:10022099-10022265	AJ_ArThaHiC20911103150386	TAAAGTAAGAATTTGGGTTTATTATTGATTCTTTTCTTCTGTGATTGTTAGATTGGAGAACACAACTCCAGTTATCTACACTGATGGGATCAATGAGAAGGGCAAGAAAGCATCTAAACG	3	-	Chr2:10022100-10022219
Chr2:10054485-10054693	AJ_ArThaHiC20911103150945	CAAGCTTGACGAACCTTTCCTCATCACCTGGTACGTAAAATGTTTTAGCATATGCAACTAGATCACTCGTTCAAATTTTATCCCACAAAAAAACTAGATCATTCGAATAAGCTACCGATA	3	-	Chr2:10054538-10054657
Chr2:10054729-10054889	AJ_ArThaHiC20911103150951	CATTTTGTACCAAAGAGAGACTAGACCCGATATATAACGGAAACCAACACTCTTATACCACTTCTACATTACCATCTCTTTAATCTTATTTAGTTCTGTTTCAATCACTATTAATTAATA	4	-	Chr2:10054770-10054889
Chr2:10112330-10112498	AJ_ArThaHiC20911103150989	TCCGGTTTATGAAACCGCCGGAATGTTGTCTGAAATGTTTGCTTACCCTGGCGGAGGTGGCGGCGGTTCCGGTGGAGAGATTCTTGATCAGTCTACTAAACAGTTGCTAGAGCAACAAAA	1	-	Chr2:10112332-10112451
Chr2:10209643-10209825	AJ_ArThaHiC20911103151431	GTCCATATCCAAATGTATCATAGTATTCAAACTCGATCTGGTATAGAATGACAAAAATACTATTTTTGGCAAATCAAAAACAATTTTATTCTGATAATTCTTTAACCAACTAAACCAAAA	5	+	Chr2:10209656-10209775
Chr2:10316468-10316694	AJ_ArThaHiC20911103151943	CCGATGCTCTTCAATGTTTAGTGAACGTGAAGATCCCAGCATCTATTCCAAAAAAGATCATCCCTTTGGGCCATAAGTACAGAATGATCGGTTGGGAATATAATCGCGCGACTTTTCTTC	1	-	Chr2:10316527-10316646
Chr2:10348950-10349132	AJ_ArThaHiC20911103152066	GTTATTGATGTTTTGGTGACAACAGGTAATTGCAGTGAGTTATGCAATCATGACCACCAGAGATGAGGATTTGGATTGGAAACTGAGGAGTTTCAGGATCTTGCCAATGTTTCTTTTACC	1	-	Chr2:10348977-10349096
Chr2:10349132-10349333	AJ_ArThaHiC20911103152071	CGTAAAGGTTTGTTCTCGCGTCTTTGGAATGCGATATTTAGGGTTAGAGGTGATGATTTCGAGAAGAGACTTAAAAATATCTCAAAGGAAGAAGCGACTGTTCGGAATAGAATGAAGCGT	1	-	Chr2:10349202-10349321
Chr2:10396351-10396514	AJ_ArThaHiC20911103152480	ACCAAAAAGATTGGCCATGGAAGAGCAAGTCTTGGGACAAAGCCACGACTGTGAAACCGGTTGTTGGAAATGAGTCAACTCTTGTTTGTTCTATGTCCTATAGCTTCTCTGGAGAATCAG	1	-	Chr2:10396383-10396502
Chr2:10397839-10398062	AJ_ArThaHiC20911103152696	TTATTGCCAGATGCCTTATTGTAAGCATTGTTATCATGAAGGATGTGTCACCAAGTGGGTGATTGGTCATAATAACTCTTGCCCTCTCTGTCGCAAACCTGTTGACAAATAGCAGAGTCT	1	+	Chr2:10397936-10398055
Chr2:10400037-10400258	AJ_ArThaHiC20911103152756	CTCAAGCCTACGAATCCTCCTCCTCCACCGCTAAGGTAATATAATCCATCTTCCATTTCGTTCAATTCCACCGATTAGGCTACAGATCGAAAGTTTCCGAATCGCTAAACGTTTCTCTGT	1	-	Chr2:10400091-10400210
Chr2:10400258-10400479	AJ_ArThaHiC20911103152764	CCTCGCCCTAATTGGCGGGAAGCTCTAATCAAAATTGGAGGGAAAATCCCCCAAAAATTCTTTCGTCGCTATTAAAATTCCCCCAAAATCTTCTCTTCCCTTTACTTTGATCACTTTTCA	1	-	Chr2:10400336-10400455
Chr2:10438757-10438925	AJ_ArThaHiC20911103153070	TTCTAAGTTCAAGAAAGTTATCTCTCTTCTTAACCGTTCCGGTCACGCCCGGTTTAGACGTGGTCCGGTTCATTCCCCTCCTTCCTCCTCCGTTCCTCCACCGGTGAAAGTGACAACTCC	1	-	Chr2:10438806-10438925
Chr2:10439249-10439401	AJ_ArThaHiC20911103153076	AAGACACGATTATAAATTCTTGCTTTGCACAAAAGAAGACCCTACATATCTCACAACTCAAGGAGACCAAACTTTGATTACTTTATTCCATAGAAATCTTCAACTCAATCTCAGCCGTTA	3	-	Chr2:10439270-10439389
Chr2:10515064-10515258	AJ_ArThaHiC20911103153260	TAGTTCATCTTCTCTCCGCTCAGAAGAAGAAAAACTTAAAAAAATTCAACGTCTGAATATGGCTAATCCACTTCTCTATTCTCCGATCAACCCACAATTCTTCCAACCACTTCTTCCCGG	1	-	Chr2:10515091-10515210
Chr2:10609502-10609676	AJ_ArThaHiC20911103153518	CTCACTGAGAAAGAGATCAATACTCTTAATGATTGGGAGACCAAATTTGAAGCTAAGTATCCTGTCGTTGGCCGTGTTGTCTCTTAGGTCTCTCTTCTGAGATTGCACTATGTTATGTAA	1	+	Chr2:10609527-10609646
Chr2:10611103-10611265	AJ_ArThaHiC20911103153540	TGGATCCTCCCAAGCCTCCGGTGCCTCCAGATCCGGTACCTCCAGAGCCTCCTCCTCGTTGTTGTAGCGATTTTCCATCGTCTCCCTCATGGTATTCCTTGTTTGTTGGATCCTCCATCT	1	+	Chr2:10611128-10611247
Chr2:10676455-10676610	AJ_ArThaHiC20911103153633	CATATCTCTCCCTCTCTCCCTCCCTCTCTTTGATTCTTTGTCTTCTCCAGTTAAAACTCAGATCTAACACAAAGCTTAAAAGATTCTCATCGTTTCTTGTTTTCTTTGTTTCATCTTGTA	3	-	Chr2:10676479-10676598
Chr2:10710965-10711204	AJ_ArThaHiC20911103153825	TCAGCCATACATGGATCTAATCATGCTTTTTCTTCTCTCTGCTCTCTTCATCTTCCCTGTTTTAATCTTAATTAAGTCTCGGCTTCGTCCCAAGAACAAGAAGAGTACAGCACCTATGGT	1	-	Chr2:10710966-10711085
Chr2:10713808-10714003	AJ_ArThaHiC20911103154028	ATCTTTTCATGATATTGCGGTAAGAGATTGTTAATTCGACTTCTGGGTACTCACATTTCGATGCTCAATTGTTTATTCTTATGGGTAATTTTGGCTAGGGTTTTTTCCAATTTCTCTCTC	3	+	Chr2:10713869-10713988
Chr2:10747430-10747606	AJ_ArThaHiC20911103154106	GTGATTTCAGAAAACTGCTTGGAGTGAAGAAGAAGATCAAATTTTGATTGAAGCACACAAAGTACTTGGTACCAAATGGGTCGAGATCGCACAGCAACTTCCGGGGAGGAGCGATAACAA	1	-	Chr2:10747439-10747558
Chr2:10757454-10757641	AJ_ArThaHiC20911103154217	AAAGAGAGAAAATGGGATTCCGTGGGAAGTACTTCTTCCCAATTCTCATGACTCTATCGTTATTTCTAATAATCAGATACAACTACATAGTCTCCGATGATCCTCCTCTCCGGCAAGAAC	1	-	Chr2:10757522-10757641
Chr2:10800988-10801171	AJ_ArThaHiC20911103154261	CAAATCATATGGATCTACTAAACCGAAATAAACCACTCATAACCATTATAGTAAATTACTTGGTTCGGAGTTTTTAATTTCCGATCGTCTTCAACATCACCAAAGCAAAAAACTTTAGGG	4	+	Chr2:10801025-10801144
Chr2:10801242-10801429	AJ_ArThaHiC20911103154268	CCGACAAGCCTCATTGATCAGACTGTTGTGCGTATTTTCTACTAAAACCTCTGCTTCTTTGATTATCGTTTTAGATTGGGATTACATTGAAAGATTAAGTTTTGTGAGATGGGTTTCAGG	3	+	Chr2:10801279-10801398
Chr2:10801429-10801646	AJ_ArThaHiC20911103154272	CATGACTAACCAAACAATCAAACTCGGCAGTGGTCTCCGTCAGGTTTTTAACTTTCTCAAAATCACTTGTTCCAAATCTTCGATCATTTTTTTGGAGTTTGAAATTTGTTGTGTTGAGTG	3	+	Chr2:10801430-10801549
Chr2:10871468-10871646	AJ_ArThaHiC20911103154460	TGTTTTAGATCTATGAGTAAATGTTGTTGTTTTTCATTTTTGTTCCAATTTTGGCTTCTAGTTTTATCCCTTTAGGACAATGTTGGTGAATTTCAGTTATAGGTTCTTGATCTACGGTTT	4	-	Chr2:10871503-10871622
Chr2:10888494-10888706	AJ_ArThaHiC20911103154596	AGAAGCCAAGGTTTCTGTTCTAGCGAAGATCAGAGCTTTAGTTAACAATTTAGAAGCGAATTATTTGAAGTATTATACTGACATCATGATTGAGGAATATGATGCATTTTGCAAACACGG	3	+	Chr2:10888543-10888662
Chr2:10890839-10891016	AJ_ArThaHiC20911103154658	ACGGTGATCAAACCTGCTTCAGGCCTGTACAGTGTACTAGGTAAATTCTTATCCAATTGTTCTTCTTTTACACCCTTGATCGCCACGAAAGTATCTTCCATCGATATTCGTTGTGGGTTT	1	+	Chr2:10890876-10890995
Chr2:10891088-10891263	AJ_ArThaHiC20911103154665	TGCAGGAATAAAGTAAACTATCATGAGATTCAGAAGAGGAAGTAGAGTTGAGGTGTTTAGCATCAAAGAAGCCTCTTATGGTGTGTGGCGATCAGCGGAGATTATATCTGGTAATGGTCA	1	+	Chr2:10891137-10891256
Chr2:10894592-10894830	AJ_ArThaHiC20911103154763	CTCGTGACGTCATTCTCCCTCGCTTCATCGTCTCTCCTTTTGATCCTCGTTACAGGTCCGTTTTTTCAAATTTTGACTCTGTTTTAATCTAATCGCTAAATTAGGGTTTAGCTGAGGTAA	1	+	Chr2:10894653-10894772
Chr2:10992955-10993188	AJ_ArThaHiC20911103154939	CTCCGCCGCGAGATGGTCAAAGGAGAAGCTTGTGGCCGTTAATCCTGTTGAACGTGTGATGAGATACGAGATAGTGGAGAGTAACACTGGATTCGAATCCTACGTTTCGACGGTGAAGAT	1	+	Chr2:10993069-10993188
Chr2:10993188-10993373	AJ_ArThaHiC20911103154940	ATTGCCACGTGGCGAAGATGGTTGTGTGATTGAGTGGAGTTTCACCGTTGATCCTGTGAGAGGATTGTCGTTAGAAAATTTGGTTAAGAAGTATGAGAAAGCATTAGAGATAATCACCAA	1	+	Chr2:10993189-10993308
Chr2:11000861-11001080	AJ_ArThaHiC20911103155115	TTCTTCCGAACCTCTACACGTTAGATCTTTCCAACAACATGTTCACCGGTGAAATCTACAACGACATCGGGGTTTTCTCTAACCTTAGAGTCCTTGATCTCGGTGGAAATGTCTTAACCG	1	+	Chr2:11000922-11001041
Chr2:11001152-11001368	AJ_ArThaHiC20911103155124	AATCGGTGGGTTATCCTCTCTTAACCACCTTGATCTCGTCTACAACAATCTCTCTGGACCGATACCTCCTTCACTAGGTGACTTGAAGAAGCTTGAGTATATGTTTCTCTATCAAAACAA	1	+	Chr2:11001201-11001320
Chr2:11041885-11042129	AJ_ArThaHiC20911103155172	CACTCACCGACTCATTCTCCTCCGACGAGTTTCGCATCTACGAGTTCAAAATCCGGCGATGCGCTCGAGGTCGATCTCATGATTGGACGGAGTGTCCGTTCGCACATCCCGGAGAAAAAG	1	+	Chr2:11041922-11042041
Chr2:11042188-11042410	AJ_ArThaHiC20911103155184	GTTTCTTCGCTCATACGACGGAGCAGTTACGTGTATTACCTTGTTCGTTAGATCCAGATCTTGGATTCTTCTCAGGATTAGCTACTTCTCCGACTTCGATTCTTGTTTCTCCTTCGTTTT	1	+	Chr2:11042225-11042344
Chr2:11058817-11059020	AJ_ArThaHiC20911103155194	AATGGATTAAATCTATAATATCTCCAGAGAGATCCTCTCCTTCTATCTTTTTGGGCTCCACTTTTCCTATCTCTTTTTGCCCCTTTCCTCTCTCTGTTCACAAGTCATCTTCTTCCTTCC	1	+	Chr2:11058854-11058973
Chr2:11059020-11059254	AJ_ArThaHiC20911103155203	CTCTTTAGTCTGTTTTTCGATTTCGTTTTCTCTGATTGGTTTGGTGGTGAGATCTCTATCGTAGTTTGTCCTTTGGGTTAAGATATTTCATTTGATTGGTGGGTTTGTTTTATTGAAGCT	3	+	Chr2:11059069-11059188
Chr2:11193880-11194069	AJ_ArThaHiC20911103155566	GGAGAAGGCTGTAATGAAAATAAGAACTTGTCCAGCGTTCAAGAGGCTGTCTTTATCGGACATAAGCGATCCAAGCTCGCCCATGTCGGTTATGGATGATCTCTCTCACTCCTTCACATC	1	-	Chr2:11193914-11194033
Chr2:11201403-11201591	AJ_ArThaHiC20911103155799	ATACGAAACTCTCAAAGATCACGAAATTGGTTTTGTTAGGGAACCATTTAGATCAAGGCTTGTTTGTGATTGTTGTTGTTGATTCAGCTTTGATTTGATTCGTTAGCCATTGATTTTGAT	4	+	Chr2:11201440-11201559
Chr2:11201625-11201781	AJ_ArThaHiC20911103155804	CAAATATGGATCCTAATTCAGTTTTACCTAAGAGAAGTTTCTTACAACATGAGTTGTTTTCACAATTACATATACCTGGAAGCTTAGCTTTCGAAGCATTTAGTTGTATCTCTAAGTTTA	4	+	Chr2:11201638-11201757
Chr2:11215602-11215768	AJ_ArThaHiC20911103156005	AAACTTGATCCACTTGAAGCATATGTACCACCAGTGATTCTAGCTCAGTTACAAATCCAGGATCTTGGTAAAATTTCTCTGTTTTTTTGTTACACATTTGTTCTTAAAACTCTTGCTATA	4	+	Chr2:11215627-11215746
Chr2:11224969-11225155	AJ_ArThaHiC20911103156094	AGAGTTCCTCCAATATTCAAAGATAGATCAAACAATTTGAAATCTGATCGAAATTTAAAATAGATTTATCTTTTGTTAATCCTACAAATAAATAAATAAAGAAACACTTACCCCTATGAC	6	+	Chr2:11224994-11225113
Chr2:11247855-11248057	AJ_ArThaHiC20911103156140	GGGTTATTTCCTGACTGGGTCTATAAGAAAGATCACCGGTTTTTAGAAGATTCTAGCGACGGGTATGATGAGTATGACCCGAGTGAGAGCCTCGTGGTCGCTGCCGATGGAACAGGGAAT	1	+	Chr2:11247892-11248011
Chr2:11248057-11248251	AJ_ArThaHiC20911103156148	ATGACGAGAACATTGATATTCCGATCTACAAGACTAATATTGTTTTGATAGGAGATGGATCCGATGTTACATTTATTACCGGAAACCGAAGTGTCGGAGATGGATGGACCACTTTCCGAT	1	+	Chr2:11248094-11248213
Chr2:11393585-11393827	AJ_ArThaHiC20911103156435	TCTTTCCGGCCAACCGATCCATCGGTGAAGCCCGTTGATCGCATGCGTGCTTTCTACGGCGATGATTACTATATCTGCAGGTTTCAGGTTTGTTCTTTATAGTCTTGTAGATAATTACTT	1	-	Chr2:11393612-11393731
Chr2:11393848-11394047	AJ_ArThaHiC20911103156445	TGGCTACCGTGCCGTCGCTCCTGACCTACGTGGTTACGGTGACTCCGATGCTCCCGCTGAGATCTCTTCCTACACATGCTTCAACATCGTTGGTGACTTAATCGCCGTCATATCCGCCTT	1	-	Chr2:11393856-11393975
Chr2:11450431-11450591	AJ_ArThaHiC20911103156767	TGACCTTCCACTCGACTGCATTCTTGAACTTCTTCCACCCTCTGAACTATGTACCATGGCTAGGGTCTGTAGCTCGTTAAGAGAGAGATGTGTAAGTGATCATTTATGGGAGAAACACTT	1	-	Chr2:11450436-11450555
Chr2:11496836-11497050	AJ_ArThaHiC20911103156965	AAGAAGAGAAAGATTGGTTTGGTGAAGAAAGAGAAGGAGAAAGAGATAGATCTGGCTAGGACTGACGTGGAAGGTAAGATTAGGTGTTGTCTTTGTGGAAAAGAGTTTCAAACAATGCAC	1	-	Chr2:11496847-11496966
Chr2:11513203-11513427	AJ_ArThaHiC20911103157139	GCCGTGGGTTTCATGCTCTTCGGAAGCACTGCTTTCAAGAACCCCTCTGATGACGAGAAACCCTTCGAACAACTATGATCACTCTTTATTTTACTTGGAAAGAACATTTCGTTTGTGTGT	1	+	Chr2:11513216-11513335
Chr2:11513427-11513662	AJ_ArThaHiC20911103157153	CTCGATTAGTTCTCTACGAGATAAGGTGAACTTTTTATTGATCAACAAAACACATATATCGTTGTATGTACCCAAAAAAATTTATAAGAAAGTAAAAGAAAAACACACGAAGACAAGAAG	5	+	Chr2:11513488-11513607
Chr2:11524213-11524378	AJ_ArThaHiC20911103157185	AAGCAGAGAGAATTAGAGGCTTGGTGACCAAGTCAGATGCCTTGTTGAAGAAGTTTTTGCTGGCGGCCATCTTGCGGAAACCACTTAAGAAGATTGGGATCACACTGTTTAAAAAGGTGT	1	-	Chr2:11524223-11524342
Chr2:11526992-11527157	AJ_ArThaHiC20911103157235	GGAAAACGGTGAAGCAGAGAGAGTCAGAGGCTTGGTGACCAAGACAGATGCCTTGACGAAGAAGTTTATCTTGGCAGGCATCTTGCGGAAACCGCTTCAGAAGATTGGGATCTCACTGTT	1	-	Chr2:11527014-11527133
Chr2:11527824-11528043	AJ_ArThaHiC20911103157264	TCAGATAGATATCAATTTCATAGTAGAGAGACTCATGAGTGAGTGTTTGAATAGTAAAAAACTTCTTAGCTGGATCTGAATATGATTTGGATTTAATACTACTGAAAAGAAAAGATTCCA	5	-	Chr2:11527864-11527983
Chr2:11545634-11545858	AJ_ArThaHiC20911103157273	ACCACACAGTAATTAATGTCTCTTTCTTTCTTCCCATGTGATCTTTAACAGACTTTTCTTCTTATTCTCCATCTCTGAAGTTGTGGGGATTCATCAAGACTTCCTTATCTGTTTCTTTTA	3	+	Chr2:11545683-11545802
Chr2:11545858-11546084	AJ_ArThaHiC20911103157283	TGATAATACTTTCGATTTTTTTTGGCTCTCTGTTCTTTCTAGATCGTTTGGTTTTATTGTCTATAATATTCATTTTGACAATCTATGTATTGATATGAGAACATTACTTCTTAGTCTCTT	5	+	Chr2:11545907-11546026
Chr2:11570789-11571006	AJ_ArThaHiC20911103157690	GTATCTTCGTTGTGTTTGCTTGGGATTTCTTTGTTTTTTTCTATATACGGAGGCATGAGATTTGAGTTTGAGATTTGAGAGAATGATCATGTCTCGCTAAATAGCAAATATCCTGCAATG	3	-	Chr2:11570839-11570958
Chr2:11581812-11581994	AJ_ArThaHiC20911103157819	TCCAAAACTGATCTTGCTTCCATGTGCTCAAATCATCTATCTAGCCTGCCAAAAACGTTCTTGTAACTCAAAAAACGTTTGCTAGTAAATGTTTAAGTGTTTAATGCTTCTTCTTTAGTG	3	+	Chr2:11581849-11581968
Chr2:11709595-11709782	AJ_ArThaHiC20911103157865	GCAGAAGAGAAGAAGAAGAACCCATTGTTCAAAGGCCAAAGCTAGACAAAGGCAAAGGAAAGGCTCATGTATTTGCTCCTCCTATGAACTACAACCGGATCATGGACAAACACAAGCAAG	1	-	Chr2:11709627-11709746
Chr2:11716799-11716954	AJ_ArThaHiC20911103157939	GCTTTATATCTTTGTGATACATATAGGAATCACGGTCGGAGTTAGCTGTAGCCACACAAACACGCGGTTCACTGTAACAACTGACAAGAAGGGTGACTTCATATCGGAACTTCCCTCAAA	1	-	Chr2:11716823-11716942
Chr2:11765883-11766042	AJ_ArThaHiC20911103158253	TAGCCGCAGTTGGGTTATTACTTACATAGTGAAATGGTTTCCTAAACGAAGATGGCTACAAATCTTTACATATCTCAATAATAAATATAGAATATCTTCACATTGATTGGTGCATCTTCT	4	-	Chr2:11765911-11766030
Chr2:11766042-11766263	AJ_ArThaHiC20911103158265	GTACTTTGGGCCTTTGGGGAATTTAAATGGAAAGCAAGATCTACGGTGTGATACTTTTTATTGTAAATATTATAGATATGGCAAATGATAAAGTTAGAATCGAGATTTTGGAATCAAGGC	4	-	Chr2:11766048-11766167
Chr2:11888329-11888499	AJ_ArThaHiC20911103158826	GTTTTGATGAAACAGGGAGCTTCAGGGGTTGGTATAGGGAATTTTCAGGAGGTTGGACCATTAGACACATTTCTCAAGCCCAGAAACTCAACTTGGTTGAAGAAAGCCGATCTTTTGTTT	1	-	Chr2:11888356-11888475
Chr2:11934518-11934759	AJ_ArThaHiC20911103159121	GCTCATCACTCAGATGGGCGGTGAGTACCCAGGTTTGATGTCTTACTGTTTTGCTAGTCAAGGAACTAGTAAGATCAATTTTGGAACAAATGCTATTGTTGCAGGAGATGGGGTTGTATC	1	-	Chr2:11934580-11934699
Chr2:11934759-11934954	AJ_ArThaHiC20911103159128	CGCTCCTATATTCGACCCTTCGAATTCTTCAACCTTCAAAGAAAAAAGATGCAACGGGAACTCTTGTCATTACAAGATTATCTACGCGGACACAACCTATTCCAAGGGAACCTTGGCAAC	1	-	Chr2:11934835-11934954
Chr2:11934954-11935164	AJ_ArThaHiC20911103159140	TGCAAGGAGCATCACCTTACGCCGATACTTTATTTGACTACAACATCTATCTAATGAAACTACAAGTCGGTACTCCTCCTTTCGAGATCGAAGCGGAGATAGACACAGGAAGTGACCTCA	1	-	Chr2:11934997-11935116
Chr2:11995457-11995707	AJ_ArThaHiC20911103159286	CCCGCCACCACAACTTGAGTCCTTTGAAATTCCACCGGTGATTATTGCTGAAGGATCACCATTGTCACAAGATAGTTGTGGGAATAATCTAAACAGGAAGAGGGTTCACTGTGATTCCAA	1	+	Chr2:11995518-11995637
Chr2:12013024-12013250	AJ_ArThaHiC20911103159414	TTCTAGTTACTTTATCGGGAGAGAACTCGATCATTGCGGATATCTTGGTCACGAAAAACAGAATCGACGTAGCAGGATGCCTTGGATCATTTGGATTCTTGATTTTCTGGTTCCTCAAAG	1	-	Chr2:12013083-12013202
Chr2:12049853-12050007	AJ_ArThaHiC20911103160031	TGAGGTAATTAGGACTTGTTGTCCTCTGTTTTAATATTCCTCTTCTTTTATCAAACATATAACCAAAATTTTATGTTATAGATTTCAAGAAGATCAAGAAGTTGTTCATGGAGGAGAATC	5	+	Chr2:12049878-12049997
Chr2:12050272-12050432	AJ_ArThaHiC20911103160035	ATCTTTGGCTGATGCTTTTTACATCGCTCAGATTCTTATACGTTTTAGAACAGCTTATATCGCGCCTCCTTCTCGTGTATTTGGTAGAGGTGAGCTTGTGATTGATTCAAGAAAGATTGC	1	+	Chr2:12050297-12050416
Chr2:12322986-12323145	AJ_ArThaHiC20911103160488	TCCGCAGCGCTTGAAGGCCACGCACCTCCTTCTCCTAAGAGAGTCAAACCGGTGAAACACGAGTGTCCCATATGTGGTGCTGAGTTCGCGGTAGGGCAGGCCTTAGGTGGTCACATGAGG	1	+	Chr2:12323011-12323130
Chr2:12333976-12334185	AJ_ArThaHiC20911103160561	AATAAGTATTGAGAATTGGTGCAGCTTATTAAACCGGACGTGGAGATAAAGATTGTGGAGAACATACCAGATGATCCGAGGCAAAGCTAAAGAAGTTCTTGGTTGGGAACCAAAGGTGAA	1	-	Chr2:12334006-12334125
Chr2:12334185-12334411	AJ_ArThaHiC20911103160569	ATATTATAAAATGATACATAGTCCAACTTTGGTTCTGTAGATGGAAGGTCTAAAGCGTCTGATGGCAGGAGACAAATCCGGACCGATCAACATAGGCAATCCAGGTGAATTCTCAATTGT	1	-	Chr2:12334244-12334363
Chr2:12359292-12359467	AJ_ArThaHiC20911103160711	CGAGATTTGATTTTTATAGAAAAGTATTTACATAAAGTATTTTCTAAATCGGTTTCTATTTTGTATGCTTTCAGTTTTATTTTGTGTTGGGGAAGTGATCCATGCATTGAGCTTGGAGAT	5	-	Chr2:12359312-12359431
Chr2:12369819-12370019	AJ_ArThaHiC20911103160772	TTATCTGCTCTGCTTTTGTTCTTGTTCATGAAACTTCAGCTTTTCAGATTCATTTCTGGTTGTTGTAGGTGGAGCTTGTTTTAGTTCAGTTAAGAAGATCGTTAGGAAAACGCGGTGGCG	1	-	Chr2:12369864-12369983
Chr2:12370019-12370235	AJ_ArThaHiC20911103160781	CGATTCTAAACATACTTAGATCTGAGTGTAGTTGAAATCGAAATCGAAATATGAATCTGATTGATTCCTGTAGGTGTTGGAGAGAGATCAAGTGATGGTGAAATTTCAGAAAGTGACTTC	3	-	Chr2:12370068-12370187
Chr2:12370302-12370455	AJ_ArThaHiC20911103160787	AACACAAATTAGCTCAAACCTTAATCGATTCAATAAACGAGATCGCTTCAATTTCCGATTCCGTTACACCGATGAAGAAGCACTGCGCTAACCTCTCCCGGCGATTGTCGCTTCTTCTTC	1	-	Chr2:12370336-12370455
Chr2:12394446-12394667	AJ_ArThaHiC20911103160830	CCATCTCTAGGGTTTTCAGACCAGAGCGATCCACAAAACGAGTTCCACATCACTCCTCCTATATATCAAGAATTACAAGATCAGGATCTTGAACCTAAATCCCAAGAGACGAATAATTGC	1	-	Chr2:12394500-12394619
Chr2:12433013-12433220	AJ_ArThaHiC20911103160890	ACAATGGGTATGTCTCTCTCCCTCTCTCTCTTCTCTTCCACATTCTCATCAACCTAAAGTTCCAATCTTTTTTGGTAACCACATTGTGAAAATGTTAAAATCTTGATTTTGTACCTTAAA	3	-	Chr2:12433089-12433208
Chr2:12444157-12444392	AJ_ArThaHiC20911103160998	CTTGGTCCTGATAAGTGGGCAAGAATAGATATGGAAGGAAGACAAAATGGTACATTCGAGGAGATCATACACAGAGTGAGGTCAAGCTCTTTGGATATTTGTCTTGTTAAAACAGGACCA	1	+	Chr2:12444266-12444385
Chr2:12454639-12454792	AJ_ArThaHiC20911103161043	AGTAAGATCATCTGGCGATAAACCATACATTCGTGGAGGAAATATTCCTACACATGACGAGTCTCCTGAACATATACAACTATTCAACACCAGATTGATTATTTCCACGATCATTATTTA	3	+	Chr2:12454652-12454771
Chr2:12455114-12455364	AJ_ArThaHiC20911103161046	TTAGATTGTGGATTACCTAGTGACGAATCTCCTTACGATGATTCGTTTAACGGATTAACATTCACATCGGATTCCACTTTCATCCAAACAGGAAAAATTGATAGTGTCGATAAAGATCTT	3	+	Chr2:12455115-12455234
Chr2:12469831-12470038	AJ_ArThaHiC20911103161267	GACAAGGTATTACACTCTCCTTCGTGCTCTCTAGGTTCTATACAACCGATCCCAGAATCTGTTAACTTTTGAGTTCGTGTTGCTTACTTTTAAGATTCCTCAAGCCATATAATCTGGTAC	1	+	Chr2:12469856-12469975
Chr2:12470038-12470239	AJ_ArThaHiC20911103161277	TTGTGTACACAATTAGTTGTAGCATTTGAGATCTTTAAAGTTGATATCTTTCTCTTGTGTGCACAATCACTTGTAGGAATTGAGATCTTTAAATTTGGTTTTTTAATCTTGTGTGCACAG	4	+	Chr2:12470075-12470194
Chr2:12470636-12470879	AJ_ArThaHiC20911103161302	AGTAGAAATCCATTGTGTCTGATGCATGAAATCGAACCATCTACTATATCGTTTGGTTTACCTGGCGTTGTTCTATATTACTGATCAGAAAAATCCATCACTTTGAGATGATAATAAGCT	3	+	Chr2:12470661-12470780
Chr2:12478591-12478742	AJ_ArThaHiC20911103161344	TTGTGGGGCTTAGAATGAAATTTGGTGAAATTATACTTGTGGCATTGCATTGTAACAGTAAATATCAAGTGTTATAGTTATGTGTATTCTTTGATACCAGATTGGAGAAGATGGGGGCTT	3	+	Chr2:12478616-12478735
Chr2:12481714-12481880	AJ_ArThaHiC20911103161428	TTGTTTTTGTGTCGGAGACTAGGAATATAACAAGGATTTTTGCGTTTTCTTGTGTAACAATTTTTAGGGTTTATTAGGGTTCTTGATTTCATCAATGGGTTCTTACTCAGCTGGCTTCCC	3	+	Chr2:12481761-12481880
Chr2:12482093-12482308	AJ_ArThaHiC20911103161435	GATTCTGATCAGCCTCTGACTACTACTACTAGCCTTGCTCAATTGGTTAGTAGTCCTGGTGGTTCTTCTTATGCTTCAAGCACCACAACCACTTCCTCTGATTCACAATGGAGTTTTGAT	1	+	Chr2:12482166-12482285
Chr2:12482308-12482463	AJ_ArThaHiC20911103161439	AGACACCGATCCCGAGTAACTTCATTTTTCAGTCTACATCTACTAGAGCCAGTAGCGGTAACGCGGTTTTCGGGTCAAGTTTTAGCGGTGATTTGGTTTCTAATATGTTTAATGATACTG	1	+	Chr2:12482321-12482440
Chr2:12492821-12492987	AJ_ArThaHiC20911103161541	AAAGTTTGCATTTTTTCCTCTTCTAAGCTCGTTTCAGATCTTCGATTTCACCATTTTTATAAACTATTATGCGAACTTAGTTTTGTTCTTTGTGATTTTGTATGACAATGATCTTCTTCT	5	-	Chr2:12492844-12492963
Chr2:12523453-12523685	AJ_ArThaHiC20911103161884	CCTCCTCGTCCTCTTCTTCTTCCTCTTCAATCTCAAGAAGCTTCTCAAGAAAAGAGAGAAGATCTTCTTCTTCATCATCTTCTTCTATCACTCAGAAATATAGCAGCTTGGCTAAAGAAC	1	+	Chr2:12523490-12523609
Chr2:12526628-12526812	AJ_ArThaHiC20911103161923	CTTACGTATGAGTCCCAAAAGACTGATCAATGTTCTATGATTACCTTAGATAGTAATTGATATTACTTGGACGCTCTAATCTTTATCAAATTCAAATCGATTAGAAGTTGATCAACAAAA	4	-	Chr2:12526669-12526788
Chr2:12619656-12619848	AJ_ArThaHiC20911103162678	ATTAAAATCTTTAGGTTTCAGATCCAGTGCACCAACGGCTCTCATGAGATGAAGTTTAGGACCGATCCAAAGAACGCTGATTTTATAATCGAATCAGGTGCAACTCGCCTTCTATTGCCG	1	+	Chr2:12619693-12619812
Chr2:12620667-12620818	AJ_ArThaHiC20911103162714	CTAAGCCCTATTCACAAGAAGATCCCTGTTCTTGTTCATAATGGTAAAACCATTATCGAGTCGCATGTGATCCTCGAATACATCGATGAGACTTGGAAACACAATCCCATTCTTCCTCAG	1	-	Chr2:12620699-12620818
Chr2:12628481-12628641	AJ_ArThaHiC20911103162740	AAATTGAGATCGTGAGGGAATGCATTCCTGATAGAGAGAAACATATTGAGCACATGATGAAAATTGTAGGACGAATCAAAGCGGTCTAAGAGACAACATGATACTCTTTGATCCAGTGAT	3	-	Chr2:12628498-12628617
Chr2:12630735-12630961	AJ_ArThaHiC20911103162955	CACAATGATAAATTATTATCCGAGTCACATGTGATCCTCGAATACATCGACCAAACTTGGAATAACAATCCAATTCTACCTCACGATCCCTACGAGAAGGCCATGGTTCGGTTCTGGGCC	1	-	Chr2:12630794-12630913
Chr2:12631013-12631234	AJ_ArThaHiC20911103162965	TTATCTTCAAGATAAGCTTGAGAGTTGAGACTACAAAAAAAAGCACAATATTGTTTTTAAAGTGACAGAGAGAGTCAGAGAGAGAGATCTAATGGCGAAGAAAGAAGAGAGTGTGAAGCT	3	-	Chr2:12631067-12631186
Chr2:12631234-12631469	AJ_ArThaHiC20911103162979	TTTCGAAAAATAGAATGACCTAATATTTAAGTAAAAAGATCAAAAACCTATTTGAAAGTTACAGCAATCAAATAACGTGGTGTGTCTGGAGATTGTAAAAGCCAAGACTAGAAGGAAATA	5	-	Chr2:12631254-12631373
Chr2:12631469-12631694	AJ_ArThaHiC20911103162986	GATCCCATTTTGTCTAGCTAGACTTTGGAAAGGTATTGGAATTGATATGATTCCAGAGGAGAAGTTTCCGGAATTAAATAGATGGATCAAGAATTTGGAAGAAGTTGAGGCAGTGAGGGG	1	-	Chr2:12631527-12631646
Chr2:12633131-12633287	AJ_ArThaHiC20911103163059	GGAGGTTTAGGTTGCCGGAGAATGTGAAGATGGATCAGGTTAAGGCTGCGATGGAGAATGGTGTGTTGACTGTTACGGTGCCTAAGGCTGAGACTAAGAAGGCTGATGTTAAGTCTATTC	1	-	Chr2:12633156-12633275
Chr2:12665677-12665877	AJ_ArThaHiC20911103163151	TAAAACCCCTCCAAAACTATTTTGACTGGTAATCATTTCAAAGGTAAGCTTGACCTCTCTTCTTCATCAATTTTGAAGTTTTCCTTCAATACCTTTGATCATTTCGTGTGTGTTTTAGGT	4	-	Chr2:12665722-12665841
Chr2:12665877-12666058	AJ_ArThaHiC20911103163160	AGAAGAAAATAATATCTTTGAAAAACAACATGTAAGCAACTAACTCCCTCGTTGTTTTTCTATTTTGTCTTCCCCGCACGATCCGATCCGTACATAAAACCATCCCCTCTCTACCACACC	1	-	Chr2:12665891-12666010
Chr2:12684273-12684426	AJ_ArThaHiC20911103163278	TTCGGAACTCCGTCGACGAAGCTTCATCGACCCAAGTCATGTGAGCTATGGAAATCATCATCATCATCATCTAGACCGATCAAAACTCAGTCGTTTCGAAGAGTTTATAGCGCAAACTTA	1	-	Chr2:12684295-12684414
Chr2:12768107-12768299	AJ_ArThaHiC20911103163893	TTTTTGTTTTGATTCTGCATGATCTCATTCACTAGTTTCATGATTTTTTTGATACTACATTTTCTAAAAGCTTTTATGGATTGAAATAGCTTTTAGATGGCTCTGGTCAGTTCTATAGCT	5	+	Chr2:12768144-12768263
Chr2:12768430-12768589	AJ_ArThaHiC20911103163900	ATCACCGGATGCCGTGAAACCTACTGCTTTGACCGCAAAGGTTACGTGATAGATACATCAAAACAATGTTCCATGGCATGGTGAAGGAATTCATTGAAAATTAACTTGGGCTACAAGCCA	1	+	Chr2:12768455-12768574
Chr2:12888771-12888956	AJ_ArThaHiC20911103164083	ATACTTACTAAAATAGGGGAATGGTGGGATAGAAACCCAATGGATGTTTTGAAGCAAGCACAATTTACGGGAGCAGCAGCTAATGTCTCTGACGCTTACACAATCAACGGTCAACCAGGC	1	-	Chr2:12888825-12888944
Chr2:12889090-12889281	AJ_ArThaHiC20911103164091	AGGCATGGAATCAGACAGCTGCGGAATCCGTGGGCCGATGGTCCAGAGTATATAACACAATGTCCGATCCGTCCAGGACAAACCTACACTTACAGATTCAAAATCGAGGATCAAGAGGGT	1	-	Chr2:12889138-12889257
Chr2:12892341-12892546	AJ_ArThaHiC20911103164185	AAAGCTTCTATGTTTACTCCAACAGAACATGAACATCACCTTCAAGCTCTTTAAAACGCCATCACTAACTTAATTCACCACTATAGAGGAATCAAAATAACAGGAAGTGATCAAATACAC	3	-	Chr2:12892403-12892522
Chr2:12932488-12932657	AJ_ArThaHiC20911103164259	ACGTACAAGAGCAGGACAGTAAGACTTCTTTAAACATATAGTATACAATATAATTAAGTATAGAAGTCTATAGATTTTCCCTTTTAAATAAAGAAAGATCATTTAATTCACCCTAATGAC	5	-	Chr2:12932502-12932621
Chr2:12932657-12932810	AJ_ArThaHiC20911103164264	TCGATTGTTGTATTTTTTAGTAACAACATGCAATATACAATAACAAAAGTTACAAAACTTACATATATAAACCATTAAGCTACAAAATTTTGGTCCGATACTACTTATGATCTGTTCCAA	5	-	Chr2:12932667-12932786
Chr2:12932810-12933000	AJ_ArThaHiC20911103164268	CAAGGACTGGTACAATTGCGCAATGTTTTGTTTAAGTTTTTTTTTTTAATCTTCAACTAACTTTCTTTAACCACCTACTCTAATGTTTATATATATTATGAATGTTTTGATCGTGGGTCG	5	-	Chr2:12932857-12932976
Chr2:12935552-12935705	AJ_ArThaHiC20911103164306	TTCGGCCCATTCTCATCCTTAAGAGATAAAACGGATTTTTTAGTGTAATAATCTGTCGTCTTCAACGGTCGAATTGAATCCAAGAGATATGAGAGAGAAAAGGGGAAATCGGAAAGCCCT	1	-	Chr2:12935574-12935693
Chr2:12961673-12961847	AJ_ArThaHiC20911103164481	ATTTATCTAATATTCTTCTATTTTCCAGTAGTTATGGATAATACCAACCGTCTTCGTCTTCGTCGCGGTCCCAGTCTTAGGCAAACTAAGTTCACTCGATCCCGATATGACTCTGAAGGT	1	-	Chr2:12961692-12961811
Chr2:13015386-13015602	AJ_ArThaHiC20911103164909	GCGTGGAGAGGAACCGTTACGAAACTTGAATGGATCGCGGATCTAAAGGATTATTTAAAACCGGTAACCGAAAACAAGATCCGATGCCCCGACCCGGCCGTTAAAGTCGAATCCGGATTC	1	+	Chr2:13015435-13015554
Chr2:13061418-13061588	AJ_ArThaHiC20911103165268	AATGTCCCTTAAGAAAGAAGACGACATAAGACAAAATGGCATCTCAATCTCAGGTTTGTTTTCTCCTCTTTACTAGGACGATCAGTTCTTCTCTCTCTAATCAATATTGATCACAGGTTT	3	-	Chr2:13061445-13061564
Chr2:13108323-13108497	AJ_ArThaHiC20911103165512	TTCTCATATCCATTTATCTTTCTTTTGGCTTTTTTGTTTTCCTTTTTCGAATTATATTAGCTGGAAATTTTAAATTTTGTACAGACACATTGTTTGTTCTCATCTTCCTTTGCTCAGCCT	5	+	Chr2:13108377-13108496
Chr2:13111318-13111510	AJ_ArThaHiC20911103165537	CAGATGAAGGTATTTCACTAGCCTTTTCAAATTTCTCTTTTATCTTTTATTTTTAAGACTATTTTTTCCTATTTAACTTATTATTTTGTTTTCGTCGATCGAAAACTTGCACCCACACAT	5	-	Chr2:13111355-13111474
Chr2:13111510-13111680	AJ_ArThaHiC20911103165542	TCAGGTACGGACCACTCATGCTCCTTCATTTTGGCCGTGTCCCTATACTCGTAGTCTCCTCCGGTGAAGCAGCTCAAGAGGTATTGAAAACACATGATCATAAATTTGCGAACCGCCCGA	1	-	Chr2:13111549-13111668
Chr2:13111705-13111859	AJ_ArThaHiC20911103165547	TCAAGAAATGGAAATGATATTGAGTATCTCTTTGTGCTTAACGACCCTCATAACCCTTCTCTTGCTGAGGCGATTCCTCAAACGAACCGCCACTAAAGTGAACCTACCACCATCTCCATG	1	-	Chr2:13111740-13111859
Chr2:13218336-13218494	AJ_ArThaHiC20911103166278	AACAGTTTTAGACCAAAAACCCTTTGGTCATCGTCACCAGAGATTAGATCTAAAACCCTATCAGAGACCATTTCGCGTGAACAAAGATGGCGGGGCCTTTGCTTCGATCTCTTTGGTCAA	1	-	Chr2:13218375-13218494
Chr2:13287901-13288097	AJ_ArThaHiC20911103167146	TGAGGGGGCAACGGAAAAAAGAATGGGAAGAGCACCATGTTGTGAGAAAATGGGGGTGAAGAGAGGACCATGGACTCCTGAAGAAGATCAAATCTTGATCAATTATATTCATCTTTATGG	1	-	Chr2:13287942-13288061
Chr2:13299858-13300039	AJ_ArThaHiC20911103167202	TCTATTACTAGGGAGGTGAAGCATCCATTGTTCAAGATGGGATCGTTTACATCAACGAGTTACAAAGACTAGTTAGCGAGCTTAAGTATTTGGTTGAGAAGAAAAAATGCGGTGCAAGGC	1	+	Chr2:13299919-13300038
Chr2:13321574-13321766	AJ_ArThaHiC20911103167325	AGATGATCTTTTCCTGATATAACGGATAATCTCAAGATTAAGAGCTCAGTGTTTGACCACACCGAATTGCTTGACTTGCATTCCACGCCAAGAACACCACGTTAAGGTGATCCTTCGGTG	1	-	Chr2:13321623-13321742
Chr2:13327294-13327487	AJ_ArThaHiC20911103167408	AAAGACTTTTTTGGATTCAAGCTAATAAATGTTAGATTACCTTTTTAACCAAAGATCAAAGTAAAACCAAAATCATAGAAGAGGAAGAGAACTCGTGATCACGTTTCTTTGGTTAAGTAA	5	-	Chr2:13327332-13327451
Chr2:13434200-13434371	AJ_ArThaHiC20911103167667	TGATAATTTGTTTGTTTTGTTAATCTCTCCGGTGTATATGCAGGAGCTTTACAGTTTAGGTGTCCGGAATGTTTTGGTTGGAGGTTTACCGCCAATGGGGTGTTTACCGATCCATATGAC	1	-	Chr2:13434228-13434347
Chr2:13436969-13437125	AJ_ArThaHiC20911103167846	ATTGGAAGATCTCTAGCCCTGGTAAATCTCTAAATCTGAGATAGATTTGAGTCTTGTGATTATGAAGAACATTTTCTTGACTTGAATGTTTGATTGTTGCAATTTTTGATTCAGGTGATG	4	+	Chr2:13436982-13437101
Chr2:13482440-13482637	AJ_ArThaHiC20911103167913	GTATTGATGGTTCTAACTTTGAGTTTTGCTTAATCGTGTAAACTCTGTAGTTGAAGTTTTAGTGGAACTTGGTTTAGTAGAATAGCTGGTTGTTGGGATCTGATGGCAGATTAGAGAAAT	3	-	Chr2:13482482-13482601
Chr2:13613194-13613373	AJ_ArThaHiC20911103168118	TCCATGGAAGAAAAAACCAACCACTCTTTTACTTTTCCTTTCTCTTCTCTCCATCTCTCTGCTTCTCCTTCGTCTCTCCCAAGACAAAATCATACTCATCACCACCACCAAAACCACAGC	1	-	Chr2:13613254-13613373
Chr2:13613373-13613568	AJ_ArThaHiC20911103168127	AAAAATTCCTCTGTAAGACACCACACCAAAATATTTATTAATAATATATTATTTGCGTGTGACTTTCTGACATTTTTCTCTCTAAACTTTGACATGGATCATCAAATCAAGAACACCATG	5	-	Chr2:13613413-13613532
Chr2:13633052-13633214	AJ_ArThaHiC20911103168290	AGAGATAATTTATTTTAAAGAATCCCAAAGAAGCTTCAAAGACTCAAAAAGGAAAGTAACCAAGAAAAAGTCAATGGAGATGGACTCAACTACTACGATCAAACCGGAGACCCTATCCAC	3	-	Chr2:13633059-13633178
Chr2:13633214-13633433	AJ_ArThaHiC20911103168296	TAAATATACGGTTCACCCATACCCATTATAAACCGTCTTTTTCACACCTTCCATTCAACAAGAACTAATTGTTGCGTATTTGACCGATCGAAGCAAGAAGGAACGTTCTGTTTATTTTCT	3	-	Chr2:13633266-13633385
Chr2:13716148-13716389	AJ_ArThaHiC20911103168893	GAGTGATGGTTGACGTATGGTGGGGAATCGTTGAATCAAAAGGTCCAAAGCAATATCAATGGAGTGCTTATAGAAACTTGTTTGCGATCGTACAAAGCTTTGGACTAAAGTTACAAGCTA	1	-	Chr2:13716222-13716341
Chr2:13716956-13717206	AJ_ArThaHiC20911103168928	GGAATTGATTATTTATCAAGGCACGATGAGTTGTCTCAGGAGCATACATTTTTCATTAGTAACTGGAGAACCTTCATGGACACTGATCGAATGTTGCATACCCCACTATCCTAGTATCAC	1	-	Chr2:13717039-13717158
Chr2:13722289-13722448	AJ_ArThaHiC20911103168938	ATCTATCTTTCAGTTCTCTTGTCAATTTTCCCCCAAAAAGAAAAAGGATATAAGAAGATAATGGCATCTAGAGAAATGCTGATCATAATCTCGGTCCTCGCTACTACACTCATTGGTTTA	3	+	Chr2:13722314-13722433
Chr2:13726916-13727074	AJ_ArThaHiC20911103169101	ACCACGTTTGTTTATTGTAATTGATCCCCTAAGCTCTAAAATTATTTTTCATTGATTTTGATTGCGATTAGTATGAATCTATTTGGAGATATATGGTTTTCGATGCTATGATTTGGTTCT	5	+	Chr2:13726917-13727036
Chr2:13737277-13737456	AJ_ArThaHiC20911103169659	TGGTGGAGAGAGATATTAAACAATGAAGGTGAGTGTGGAGATAATAACGGGAACATTTATAGATACGGACGTGAGTGAAGATGCGACGGTCAAGCAAATGAAGGAGAAGATCGCGGTGGA	1	-	Chr2:13737313-13737432
Chr2:13737456-13737681	AJ_ArThaHiC20911103169667	CGGTATCCGATATTTGATACATTGAATTGAAAACGAAAATCGCATGCGTTGTGTTTGGTTAGTTCATGTTTTCATACATAGCAAGATCTTAAAACAAAAAAAAAAACCATTGCCAAAAAA	4	-	Chr2:13737514-13737633
Chr2:13792312-13792545	AJ_ArThaHiC20911103169801	ATTAACCCCTCTTGGCCGGTTAAGGATCAAAGATGTTTTCCAAAAGTTGTATATATGTATGGTTTGCAATTCTAACCAACTAGACCGGTTAGGGGTAAGTCAGCATTCTCTCCTCTGATC	1	+	Chr2:13792385-13792504
Chr2:13797114-13797295	AJ_ArThaHiC20911103169930	TACATCACCTGGTTCGTATAAGAGTTATACAATAAATAAATGATCAGATTCAGATGTGTATTTTAAAACTATCCTTAGAAATTAATTACAAAACATTTTTAAAAAAAAGATCAAAAATCA	6	-	Chr2:13797152-13797271
Chr2:13836073-13836274	AJ_ArThaHiC20911103170227	GCTTTTCTCTTCCTCCTCTTTGTGAAAGGATCTCATACACGAACTATTTTCTAAGAGCTGTATATCTCACGGTTCTAGGCCTTTTCTTTTCTCTTCTCTTGCACCGAATCCGACATACGA	1	+	Chr2:13836110-13836229
Chr2:13857999-13858152	AJ_ArThaHiC20911103170433	GCTCGTGGTACGGTGATTCTCGTCGAGTATACAGAATTCAAAGGAAATTTCACTGCCGTCGCTGCACAGTGTCTCCAAAAGCTTCCTTCTTCGAATAACAAGTTTACATACAATTGCGAC	1	+	Chr2:13858033-13858152
Chr2:13858152-13858342	AJ_ArThaHiC20911103170434	GGACACACGTTCAATTACCTCGTCGAGAATGGCTTCAGTGAGTCTCTTCTTCTCGATCTCTATATATGATTCTCTCTAAGCTTGAAACTCGCGTTACAATAAGTTTCGGTTTAATCAATG	1	+	Chr2:13858153-13858272
Chr2:13887164-13887386	AJ_ArThaHiC20911103170549	GGGGATACAACGTTAAGCTGAGAGACGAACTTGGTGAAGATCTAGCTCAATGGCTTAGGGAGAGACCAGAGTGGAGGAAAATGTATGGACGAGATCATTTCTTTGTCACGGGACGGGTTG	1	+	Chr2:13887213-13887332
Chr2:13916495-13916716	AJ_ArThaHiC20911103170670	GATTTCAATGGAGATCAATAAATCATTCACTGACATGGAAGGTGTTCAGCTTTCCAGCAAAGTCGGTTGCGAGAATCCAAGAATCTTTGGATACTCTGAGCTTTATATCGGAACTAATGG	1	+	Chr2:13916568-13916687
Chr2:13916839-13917077	AJ_ArThaHiC20911103170679	GAGTTGCTTCTTGTTTACGATTACATGCCTAACCGGAGCTTAGATCGTGTGCTTTTCCGACGACCGGAAGTTAACTCCGATTTTAAACCGTTGGATTGGGATCGGAGGGGTAAAATCGTC	1	+	Chr2:13916900-13917019
Chr2:13917205-13917388	AJ_ArThaHiC20911103170688	ATTCGACTCGGATCGGTGGGACTATCGGGTACTTACCACCGGAGAGTTTCCGGAAAAAAACCGTTGCCACCGCTAAAACAGATGTTTTCAGCTTTGGTGTTGTGGTTTTAGAGGTTGTCT	1	+	Chr2:13917242-13917361
Chr2:13925820-13925982	AJ_ArThaHiC20911103170694	AGATCACGAAAACCCTAAGATACGAACGGAAGCTCACGTCTTGTTCACTTCATGGATGAAGACTTTTTACTCCAGCGGACAAAACTCTTCTTCTACTTGCAACAAACCTAATCCCCTGAA	1	+	Chr2:13925845-13925964
Chr2:13925982-13926232	AJ_ArThaHiC20911103170704	TTTGGGGATGAAGAAGAACGAAGATGAGAGATCTAGGGTTCATGAAACCAGAGAGATGAAACAAATTGGTGATTCCAAGTCTTTTGCATTGATGAGGACTATCGAGAAGAAGAAGCAATC	1	+	Chr2:13926067-13926186
Chr2:13926674-13926834	AJ_ArThaHiC20911103170729	ATCGTGACTTGAAAGTTTTGGTTTTCTATTCGTTTAGTAAACTAGAGTAGAGTAGCATGCCACTTAAATTCCATTACTTAGAAGCAAACAATGTTATGAGTTAATGAGTTGTGAATATAT	4	+	Chr2:13926699-13926818
Chr2:13929542-13929710	AJ_ArThaHiC20911103170785	CTTATAAACTGCATTTAATTTTACATAGATAACTGCACTCACTGTCACATGCATGTTCACAATATCTTGACTATATAATAATTACATTTATAAAATACTAGCCTATGTGATCAAAAATTG	5	-	Chr2:13929567-13929686
Chr2:13929710-13929888	AJ_ArThaHiC20911103170791	GTTTAAGATAGAAACCAAAACCAAGCTTAATAAAGTTAGATTGATTCCTAACGTTAGAAAAAAAAAGTTAGATTGATTCCTCACGTTTCAAAAGGGGATCGTTGGTTCTTGGCCTCACAC	3	-	Chr2:13929733-13929852
Chr2:13940331-13940510	AJ_ArThaHiC20911103170870	ATTTGGGCACCATCATTGGACCCGAGTTTGAGATCCACAAGCAAGATTTCCCCGCAGATTTCATATTTGGAACATCTGTTTCCGCATATCAGGTCAACATACATATAAACACATTATAAC	1	+	Chr2:13940344-13940463
Chr2:13941050-13941244	AJ_ArThaHiC20911103170905	AGGTGTAAACGAGGAGGGGGTGAAGTTCTACAACGATCTTATAAATGAACTTTTAGCTAATGGTTAAACATCTTATAACTTAATGTCTCTTATATTATTCAATCTTAATTGTTATTTCCA	5	+	Chr2:13941075-13941194
Chr2:14067787-14068010	AJ_ArThaHiC20911103171309	TGTCTAGAGATGATAATGGTTGGTCAAAGCTTTATCCTGATCTTTTGCGATCGATATTCGAAAGCTTGAGTTGCTTGGATTTTCATCGAGCAGGAACCGTTTGTTCAAACTGGTATGCCG	1	+	Chr2:14067836-14067955
Chr2:14148925-14149175	AJ_ArThaHiC20911103171694	CAAGGAGCAGTGACATTGAAGGAGATTTCAAGTTACACTTATGAGGTGATTAAGAATATTGGAGTTGGTGTGATTGACATCGTTGATCCACCAAGATTAGGGTTTCAATTGACCCTTGGC	1	-	Chr2:14149008-14149127
Chr2:14149304-14149459	AJ_ArThaHiC20911103171705	AAAATCAATTGGCAATAAGTTCATATCCAATGCCAATGTGAGACATTATAACATAAGGTTATTGAATCCATGGCAGTGCTGAAAAACCTATTGAGGTCGATCAACATTTCCATGAGTTTG	3	-	Chr2:14149305-14149424
Chr2:14194971-14195164	AJ_ArThaHiC20911103171868	ACGGAATGAGAGTGAAAGAGGATCCAAGGAAAGTGATGAATGCAGATCCTGACAGTGGAGACTCATATGGAACCGTGTGTTCAGAAGAAGATAGCTCATATTACGACAGCGAAGAGTCTT	1	+	Chr2:14195008-14195127
Chr2:14199909-14200117	AJ_ArThaHiC20911103172040	CTTTTTTTGAGTAAAACGCAGGACCTGGATGTTCATCATTAGGTGTTGGTGCATTCTCTGAGAATGGACCTTTTAGACCAAAGGGATCAATCTTGGTGAGAAATCAACACAGCTGGAATC	1	-	Chr2:14199950-14200069
Chr2:14259894-14260059	AJ_ArThaHiC20911103172144	TTCGGACAAATATGATTGGCAAGGCTTGGTTGCAATGGTCGTATTTTGGTTGAGATAACTAGCCAGAGAGAGTTTTAGGATTGTAACATGGGGAAAACGTATTTAAAATGATCAAACTTA	3	-	Chr2:14259916-14260035
Chr2:14365188-14365416	AJ_ArThaHiC20911103172428	TGATTGCTGCCTTTCCCACCTTTTCTTACAAACCGGATAATAATGATCCTGAGAGCAACAATCAGGAGATCGAGTGTCCGGTTTGCTTAGGATTAATCCCCAAGAATGTTGTAATTAAGG	1	+	Chr2:14365237-14365356
Chr2:14393803-14393961	AJ_ArThaHiC20911103172566	GATTTGGTCATTATATTTTGTCTCGTTTCTATTATGATCGGCATCCAACTTACCAAATATCCATATCTACAGGATGTTGCTGGGCATTTTCGGCTGTAGCAGCAGTGGAAGGTGTGGCTA	1	-	Chr2:14393830-14393949
Chr2:14446504-14446699	AJ_ArThaHiC20911103172908	GTAGATAGAGGATCAGAGTTCAAGATTAGATCTGCTATTGCTCTTGATCATCTTCAAAACTATGTATATATTGAAGCGGATATGGAAGCTCATGTGAAAGAGGTATTTTTATGGTTTGTC	3	+	Chr2:14446553-14446672
Chr2:14450531-14450705	AJ_ArThaHiC20911103172930	ATCTTCCAAAGAAGATCACGATCACACAATATTTCTATTGTTGTACATTACTATATAAACATAGGATACATAGATGAAGTGAGCTCTAGAAATGAAATCCATGGTCTCTTCTCCTAAACG	4	+	Chr2:14450556-14450675
Chr2:14450711-14450930	AJ_ArThaHiC20911103172939	AGCAAGAGAATGGTGAGAGTAGCGATCAAAGTCAGACCAATCTACGAACCCTGGAGTGCACACTAGGTGCTCGACGAAATGTCCCAGTGAGACTTCACTTCTAAAAATAAAAAGTGAAAT	1	+	Chr2:14450772-14450891
Chr2:14451387-14451597	AJ_ArThaHiC20911103172960	ATGCTCGTTCGCTAATCAAGTTGGGTGATCAGCTTCGGATAAACAAGTTTTATGAGAAAGCTGTGTCCAAAGCAAAGCTGGGAATGTCCATAACGTCACCTCAAGGAAAGTCTACGGATG	1	+	Chr2:14451436-14451555
Chr2:14484838-14485077	AJ_ArThaHiC20911103172970	TATTCAAATGTTGCTTCGCTAGACTTGTCTGGGCTATTTCACCGATCCCAGCATATCCTGAAGGAGAGTGGACTGATTCTTTGTACGCCAATTTGTATTGGGTTCTTAACTTGGAAGTGG	1	+	Chr2:14484899-14485018
Chr2:14485783-14485956	AJ_ArThaHiC20911103173020	AATCTATTATTCAGATCTAAACTCTTCGATCTGAGACCTATTTTGTCTAGAATTGGCCGAGTAGGGTCTGACGCGAACCTAGGATGCACCCAGATTGACATTTCAGCAGGCTGATGTGAT	1	+	Chr2:14485808-14485927
Chr2:14493344-14493578	AJ_ArThaHiC20911103173044	TTTTAAGACAATGGATACTCATTTTGATCGATGTAGATAGACATAGAGAACAAGAGAAAAAGAGAGAAAGATGGAGTTCGCAAACACGAAATGGGTGGCTGCAGCGGCGAGCATATGGAT	1	+	Chr2:14493417-14493536
Chr2:14557581-14557822	AJ_ArThaHiC20911103173476	AAAACAGAGATCCTCTGTTCTGTTCTTTAACATACATTTTTGGATTGCAACAGAGAGGCAGTGGAAGAGTACATTAAAGAGATGAAGAGAATGTCGAGCAAATTTCTGGAAATGGTAGAG	3	+	Chr2:14557678-14557797
Chr2:14596492-14596692	AJ_ArThaHiC20911103173637	ACATTCTAAACTAGTTTTTTTGGGTACTTCTCTCTTTAAAACCTCTCCCTTCTCTCTAAAAGTAGATCTAGATCTCAGTTTGCGTTGGCTGGCTCTGGTGGCTTCCATAGCGCCGGAGCT	1	+	Chr2:14596493-14596612
Chr2:14596698-14596886	AJ_ArThaHiC20911103173647	TTGGTCTCTGTTGCTAGTAGCGCCTCTTGATCCGGTCATGTTTTAACCTTATTCTCGTTTAGCCTTTTACCAGGCTTGGTGGTTGCTTTCGTTTCTGTCCGGTTCGATCTCCTCCCGTTT	1	+	Chr2:14596723-14596842
Chr2:14602469-14602671	AJ_ArThaHiC20911103173696	TTTGGGGAATCTTCGAGCAAATTAGTGAGAGAACCCACCCACTTTCTTTCTCATATGAGTACATAAGATCCCTTTTGAGTTTTCGTGTTTTGCCAAAATCTCCAGGTAAAGCTTCTCCCT	1	+	Chr2:14602470-14602589
Chr2:14685740-14685900	AJ_ArThaHiC20911103174088	ATGAGAAAATACGGTTTATCCATTGATCATATAATCGACGCTCAAATCATGGACGCCAACGGTAAAGTGTACCGTAACCGTCAAGCTATGGGAGAAGACGTGTTTTGGGCTATTCGCGGC	1	+	Chr2:14685741-14685860
Chr2:14696356-14696520	AJ_ArThaHiC20911103174423	TCTCGTTTCATCAACCATTCATCTTCTTTTCCCCAATAAGATCACCAAATTTCCCCAAGTAAACAATCCAACATCACTGATCACCCTTTTCCCAAATAACTACAAAACGATCGAGAATTA	3	-	Chr2:14696377-14696496
Chr2:14720175-14720330	AJ_ArThaHiC20911103174529	TATATAAAACAGAGAAATCTTTGTGTTTGCAGGAGATAATGAATCCAGGCCTTTTGCTGACGCACTTAGCCAATTATCATACAGTGTAGGCCGTGAGAATTTCTGTCTGATCCATGTCAC	1	-	Chr2:14720187-14720306
Chr2:14720896-14721066	AJ_ArThaHiC20911103174571	CTTCGCGTTACTTGTATCAAAATCGGTATCTTTCTTTCGTTGAGTTCAAAATGTATATGATGTTTACTTGTGGGGCACTCAACCTAAAGCCATTTTTTTATATCTCTAGATCCGTATTTG	3	-	Chr2:14720923-14721042
Chr2:14752407-14752561	AJ_ArThaHiC20911103174845	CAGGTCGTCAGGATCAGGAGGTTGACGGCGCGTGGGCTCGACGCGGAGGCTATAGAAACTTTCCCGACGTTTCTTTACTCGGAGGTGAAGGCGGTGAGGATCGGGAAAGGTGGTGTGGAG	1	-	Chr2:14752408-14752527
Chr2:14836055-14836231	AJ_ArThaHiC20911103175097	TCACATCCCTACAATGGCGTCTGAGAATCTGAATGACAAGATCTCTGTTTTTAAGAAACTCAAAGCCAAATCAGATAATAAGGTAATGTTAACGATGTTCTACAGAATCTATAGATTCGA	3	+	Chr2:14836056-14836175
Chr2:14836432-14836603	AJ_ArThaHiC20911103175108	TTTAGGTCAACCAATTTAGATTCATGGAGCTCAGAGCAATTGAAAATGATGATATATGGAGGAAACAACAGGGCACAAGTCTTTTTCAAACAGTACGGATGGAGCGATGGAGGTAAAACC	1	+	Chr2:14836485-14836604
Chr2:14857032-14857276	AJ_ArThaHiC20911103175184	GATCGAAGAACAAACCGAAGCCGCCGGTGATTGTCACGCGCGAGAGCGCAAACACTCTTAGGGCTCACATTCTTGAAGTTGGAAGTGGCTGCGACGTTTTCGAATGTATCTCCACTTACG	1	+	Chr2:14857141-14857260
Chr2:14935205-14935376	AJ_ArThaHiC20911103175334	AGAAAGATGGACCTGGAAGAATCAATAGAGAAGCAATATAAGGCCATGATGGACCTGAAAGAATCAGTAGGGAATCAAAACGACATTGTTCTGAGGTTGACAGCACGTGATCGCCACTAC	1	-	Chr2:14935233-14935352
Chr2:14965254-14965490	AJ_ArThaHiC20911103175752	CAAATAAATAACAATGGGCTTTAGTAGGCCCACGCAATAACGATGTTTTAACTGACCCAACAAGCCCTTGTCCAGTTCTGGCATTATACAATGCGTCGGTCGACACGTGTAATAAGTCAT	1	-	Chr2:14965359-14965478
Chr2:14965490-14965671	AJ_ArThaHiC20911103175767	TGAAATAATGATTATCAGTCCATTGTTTGTTCCATTTTTAAGTACACTTGTTTGTTTGATTTAGGTGAATAAGATCCGCTAAAGCTGAAAATACAAGAATTGTCCCTAAAGATAGTAAAG	5	-	Chr2:14965492-14965611
Chr2:15000093-15000308	AJ_ArThaHiC20911103175823	ATTAACGAGCTTCGTCTCTCAGATGAGGAAGGACTCAAATTGAGATCTTTCATGGATCAACCAGGCTTCTTGGATCTGCATTGGGTATAACACAAAATTTACAATTTCCCTTGGGTGGTT	1	+	Chr2:15000130-15000249
Chr2:15000337-15000582	AJ_ArThaHiC20911103175834	GCTTGGTCATGGCTCTAATGTTCAAGGCCTTGAGACAACCGCTACTTTTGATCCAAAGACAGATCAGTTTATCATTCACAGTCCAACTCAGACATCATCCAAAGTAAGGGGAAGAAGTAT	1	+	Chr2:15000398-15000517
Chr2:15000670-15000920	AJ_ArThaHiC20911103175846	GTAACAAGATTTTTCTGTTTTTCAGGATTCATCGTGCAGCTGCGTAGTTTGGATGATCATTCTCCTCTTCCGGGTATAACCGTTGGTGATATCGGAATGAAGTTTGGAAACGGGGCATAT	1	+	Chr2:15000731-15000850
Chr2:15051061-15051253	AJ_ArThaHiC20911103176163	GGTTCCTAGATAGTCGTGTTGATCAGTTCCTAATAACAAAAGACTTATAGATTTTGTAGGAACGTACTTATTTACTACAAAATTCAACAAAACGAAAGACCAATTCAAACTAGACTCTTC	4	+	Chr2:15051098-15051217
Chr2:15051253-15051496	AJ_ArThaHiC20911103176173	ATATTCTCATTATGTTTAATACTTGGGACAGGTTCTATATAATGCGGATCAGAGATACACCCTTTGACTTTTCCGTACTCACTCACCACGCGAGCGTGACACAGTGTCTAGGATCAATAG	1	+	Chr2:15051314-15051433
Chr2:15053614-15053863	AJ_ArThaHiC20911103176282	CTTTAATTGAATTTGAGAAATCATATTGAATTAACGAATATGCTAACTTCAGGAAGACGATATTAGCAATCATGGAGCGTCTAACATCTCCTCCTCGTTTGATGATTGTCTCTGATCTTG	3	+	Chr2:15053744-15053863
Chr2:15068367-15068554	AJ_ArThaHiC20911103176374	AGTCGATTCCGAAGAGGAAGCTAGAGAACGAAGAAGACGTGGAGGATGTGAGAAGAGAGATTGAGATAATGAAACATCTCTTGGGGCAACCAAATGTGATCTCCATCAAAGGAGCTTATG	1	-	Chr2:15068399-15068518
Chr2:15069060-15069286	AJ_ArThaHiC20911103176415	CAGAATTCATTTGTGGGAGATTTATCTGTCTTTCTTCATGGAAGTGGTTATGTTGTTAGATAGGAGAGATCTTTGTCTCTATGAGATCATGTTAAGGGTTTTTTCTCTTGCGTGAAAAGG	3	-	Chr2:15069119-15069238
Chr2:15091157-15091332	AJ_ArThaHiC20911103176470	CTTGCTGGTGAGTGGGATCCACTTGGTGGCTACCGTAGAGACTGTACTGCACGCGCGGAGGATAACCGTGAAGTACGGAGATGTTGTCGGCGGCTGTAATGGAAGCAGCTTCGTGACCTG	1	+	Chr2:15091182-15091301
Chr2:15091663-15091860	AJ_ArThaHiC20911103176509	TCTCTCTTTCTCATAATCCATAATTCATCCCTTCTTCTTCGTCTTCTTGATGTGATCACGATTCTTTTTTTCTTCGCTTCAACTGTATATATATACAGATCTATATTAAACTTATAGTGG	4	-	Chr2:15091705-15091824
Chr2:15091904-15092079	AJ_ArThaHiC20911103176516	CGTGTGTATGTGTGTGTGTCTGTCTCTCTCTCTTTCTCTTTGATAGAAATTCTCTAATGTAACTTTCCTTTTGCAGCTTGAGATGATCATGAAACACGTGCATCCTCAGATCTCTATCAA	2	-	Chr2:15091936-15092055
Chr2:15092103-15092286	AJ_ArThaHiC20911103176524	GTCATTTTTATTTTGTTATATATTATTTCTCAGCTTTTTAAATGTATTTTATATTTCCCCTTTGAGCAAGAAAAGAGTTGCAGAGATCTTTGAGTCTGACACAGAGACCAAACTCACATA	5	-	Chr2:15092119-15092238
Chr2:15107754-15107905	AJ_ArThaHiC20911103176709	ATAATTTTTTGTTTGAATCTGCTATAACTACATGTCATATAAATTCCTGGAATATATATGTTTGTTAGTTGACGTAGTTCTGAAATTATAAGAAATTAATTCAAAAGTAGAATGTGAGGA	6	+	Chr2:15107786-15107905
Chr2:15109614-15109768	AJ_ArThaHiC20911103176834	TCTGCTGATCATATAACATACATAAAATCAAAAAATTTAATATGATAAATTCATGTTAAAAGAACTTGCCAAATAAAAACCGATACAGAATTTTCTTGTAAAACATTCTTCAATCTTTTT	6	+	Chr2:15109627-15109746
Chr2:15290684-15290879	AJ_ArThaHiC20911103177926	CTTCTTTACAATCTCTAGCGTTTGCGTTTTTCAACAACATGATGCACAGAACAGAGGAAGATCTCGCCAGGTTCAAAGAGCTAAGAGCCAAACACCTCCTCGACCTCCTCCGGTCAAGTT	1	+	Chr2:15290685-15290804
Chr2:15290879-15291043	AJ_ArThaHiC20911103177936	CCGGGATCAAACTCCGAGAGCTGAAAGACGCAGAGAGCTTCTTAGTGGTGAGATTCAGACACGGGACCATCGAGATGCCGGCGATCACCGTCGACGATTTCATGAGCAGTTTCTTAGAGA	1	+	Chr2:15290904-15291023
Chr2:15327449-15327639	AJ_ArThaHiC20911103178007	GACACAGATCCAGAAGAGACAGAACTGAGTTGGATTCTTGATAAACTTAGTTTAGTACCGAAGAAGGAGGACAAGAAACTCTTGGTCTTAAGTCTGAATGGTCTACTTCTACACCGATTG	1	+	Chr2:15327498-15327617
Chr2:15328316-15328475	AJ_ArThaHiC20911103178037	ATCTTATTGTGCATGCAGGACAATACAGGTGTGTTCCCGTTGAGTTATGACCCGTCAGACACAAAAGATAATTTACTTGGTACGCAAACAGTTTTTGACTTGTGATGTTTATCTGTTATA	3	+	Chr2:15328341-15328460
Chr2:15328475-15328646	AJ_ArThaHiC20911103178042	TGTTTATGTTAGATCCAGAAGGAGAGTTCTGTTCTTACTTGGATGGTTTGGCAAATTCATCTGATGTTCAGGCTTACATAAAGGAGCATCCTTTTGGACAGCCCATGATCGATTCTTCTC	1	+	Chr2:15328500-15328619
Chr2:15390229-15390404	AJ_ArThaHiC20911103178242	AGGATATCGAGGTCACAACAATTAAACCTAATTAGCTAACGCATATAATGATATGAGTTTTCATGTGTGTATGTGTTTTGAATGGAGTAAGAACAATGCACCAGAACCAGATCCTGGTGA	3	-	Chr2:15390261-15390380
Chr2:15411010-15411198	AJ_ArThaHiC20911103178340	AAGGTTAAAGCGGGTAAGATATGGAGCATCGGACCGGTTTCCTTGTGCAACAAGTTAGGAGAAGACCAAGCTGAGAGGGGAAACAAGGCGGACATTGATCAAGACGAGTGTATTAAATGG	1	-	Chr2:15411043-15411162
Chr2:15418433-15418598	AJ_ArThaHiC20911103178505	TGCCTTATACAAGCATAATCGCCAAGAACTTCAATATACCAAAGATAGTTTTCCACGGCATGGGTTGCTTTAATCTTTTGTGTATGCATGTTCTACGCAGAAACTTAGAGATCCTAGAGA	3	-	Chr2:15418455-15418574
Chr2:15418598-15418774	AJ_ArThaHiC20911103178510	AAGTTTCCATATCAAGAGTTTGGTTTGCCAGAAGGAAAAGAGAATATAGATTCGTTAGACTCAACGGAGTTGATGGTACCTTTCTTCAAAGCGGTGAACTTGCTTGAAGATCCGGTCATG	1	-	Chr2:15418631-15418750
Chr2:15418919-15419163	AJ_ArThaHiC20911103178522	CCCCACTTTTCTTATCTTATATAACCTCACATATATGATCGAAGAAATTAAAAACACATAACTTGAGTATTCCTCATTGAGTCGTTGCAAACGGTATGGCTACGGAAAAAACCCACCAAT	3	-	Chr2:15418948-15419067
Chr2:15419163-15419400	AJ_ArThaHiC20911103178528	TGCATCTACCAGAACAAATTGAACTTTAAAATTTCAAACAGAATTCGATTTTGAGACTTGTATCGTGTAACTAACTTAAAGAGCCCAAATTTATTTTTCTGTCTCGTGGATCAAGTATCT	4	-	Chr2:15419257-15419376
Chr2:15421006-15421199	AJ_ArThaHiC20911103178720	ATAAGGAGTACTTCATTGTTCCTTATTTTCCTGATAGAGTTGAATTCACAAGACCTCAAGTTCCGGTGGAAACATATGTTCCTGCAGGCTGGAAAGAGATCTTGGAGGATATGGTAGAAG	1	+	Chr2:15421043-15421162
Chr2:15473966-15474163	AJ_ArThaHiC20911103178964	CAGATCAGGCTACTTTGGAGCAAACATCAAACTCCAACCTGGCTACACTGCTGGAGTCATCACATCTCTCTATGTGAGACTAGAGACTCACTTAAGAAACTACTTTTTAATTACATTAGT	1	-	Chr2:15474032-15474151
Chr2:15490072-15490242	AJ_ArThaHiC20911103179066	TTCCACCACCGCCTCACGCATCTCTCTGTTTCTGTGATTCTGTTTCTGTCTTTGTGGTTATGGCAGAGACTTCTACGCTTCTCTTCTCTACCTTCTCCTCTCACCTCACGATCTCTCCTT	1	-	Chr2:15490099-15490218
Chr2:15515500-15515679	AJ_ArThaHiC20911103179156	CGGCTCCTCCTGCTCCTGCTCCGGCAGCTCCAAAAGAGGTATAGATCTAATTGAATAATAACAAGAGACAACTATACTTTTGCTACTGTACGCCAAGTTCTTGACGGTTTACGTTAGCAA	1	+	Chr2:15515501-15515620
Chr2:15515780-15515940	AJ_ArThaHiC20911103179162	TGTTCAGAGCGTGGTGCCTTTAAAGATCAGACTACATTGCGAAGGATGTATTCAGAAAATCAAGAAAATAATATTGAAAATCAAAGGTAAGAAGGGATTAATAACCAACGAAAATTTATT	4	+	Chr2:15515781-15515900
Chr2:15529538-15529781	AJ_ArThaHiC20911103179213	ACATCATTTTTGTTTTTGAACTTTGTGGTAGATAATCGTAAAGACGTGATCGATTACGTACCAGGGGTTAAAGCAATAGAACCAAAGGACTTGATGTCATATCTTCAAGTAAGCGACAAA	3	+	Chr2:15529599-15529718
Chr2:15591360-15591564	AJ_ArThaHiC20911103179313	GAAATCATTTTCTCATGCTAGTTTCTCGAAAAAATCAGAGAAGAGATCAAGTTCGTCTAGAAGTGAACCTATCTTTGGCCGCTCCACGGTGGAGCCAGAGGAACCAGAAGAGACTCGAAA	1	+	Chr2:15591385-15591504
Chr2:15591564-15591726	AJ_ArThaHiC20911103179323	ATCTCCTTCATCAGCTAATAGCTTATTTGAAGATCAAGAAGAGACAAATAAAGCTCCTTTCCAACGACACGCTTCGTCGGAAAATGTATCAGTTTCGGAAGAACCGAAGACAAGCGTTAC	1	+	Chr2:15591607-15591726
Chr2:15614524-15614736	AJ_ArThaHiC20911103179594	CAACTTTCATATATAACAAAAAAAGTTATAGAAATGGCCAAAGACGTGGAAGGACCTGAGGGATTTCAGACAAGAGACTACGAAGATCCGCCACCAACTCCGTTTTTCGATGCGGACGAG	1	-	Chr2:15614569-15614688
Chr2:15802049-15802233	AJ_ArThaHiC20911103180058	TTTCCATCACATGATCATAAGTAGTAGTAAAAATGTGTTGAAAATGGAAGAAGTTGAGGTGAGCAAGAAGAGGAAATTTCAGACAGATCAATCTGATGAGTTATCGTTATTACCTCTGTC	3	-	Chr2:15802066-15802185
Chr2:15802362-15802599	AJ_ArThaHiC20911103180061	TTTGAACTCTCTCTATCTCTCTCTCTCTCTCTGCGATCTATGCCTGAAGTGGAAGTGGATAACAACAACGAGAAGCCATCTGAGATTAACAGGTTTCAGTTTCTCAATCTATTCCTATAT	1	-	Chr2:15802480-15802599
Chr2:15802697-15802893	AJ_ArThaHiC20911103180075	AAGATAAAAATAAAAAACGGTCCCGTGTAAGAAGATGGGTCACCTCGCCAACACGTAGACTCTTTTCACGCGCCAAATCAAACACCATGTCGACGAGATCAACGGATTCAAATGTTTCGT	1	-	Chr2:15802738-15802857
Chr2:15830946-15831137	AJ_ArThaHiC20911103180205	TTTGTAAGATCCGATTTAGATGTATCGGGTCCTGGATCTAATTCCTCCAATAGGGCGTCGTCGTCGACAAGCACAACTACGTTTGCTGTTTACGCGGGAGTCCAGTCACCTGTTTCTCGT	1	+	Chr2:15830995-15831114
Chr2:15834716-15834898	AJ_ArThaHiC20911103180387	CACATCTGATAATGGCAAATGCGATCACATTTTTCAAGCTCAACACCGGCGCTAAGTTCCCTTCGGTGGGTCTTGGAACATGGCAAGCTTCTCCTGGCCTCGTCGGTGATGCAGTCGCCG	1	+	Chr2:15834741-15834860
Chr2:15835657-15835861	AJ_ArThaHiC20911103180425	TTTTTTGTGATCTTGTTGAAGATACACTGGCCTGCACGGATAAAGAAAGGTTCTGTTGGAATAAAGCCAGAGAACCTTTTGCCTGTAGATATTCCTAGTACATGGAAAGCGATGGAAGCA	1	+	Chr2:15835718-15835837
Chr2:15838160-15838340	AJ_ArThaHiC20911103180497	TCCAACAAAGTCAACTAAAATAATAACTATTTGTATCAATTTTATTGCATATTTTGGATACACTTCCTTTGATAAGAGAATACAGATCAAAAAACCTTTTGGCTTCCCCACAAACCAACC	4	-	Chr2:15838173-15838292
Chr2:15873061-15873308	AJ_ArThaHiC20911103180568	TGGAGGTAGATTCGAAGTCTCAACAAATGAGGAATCAGAGTTTCTCAGTTAGATCACAAGCATTTTCAGATGCAACGGATGCTGATACAGTGATGAGAGTGGATCAAAAGGGAAAACGAG	1	+	Chr2:15873122-15873241
Chr2:15944702-15944921	AJ_ArThaHiC20911103180783	AAACCCACCTGAGTTTTCTCCATTTCTCTGTTTGGTTTCTTGTCAGTTTTCAAGAAAGCGTCCAAATCCTAGATCCTCTGTTTTCTCTTCTCTGTTTGCTTTCATTTTCTCTGGATTCGG	1	+	Chr2:15944715-15944834
Chr2:15945257-15945477	AJ_ArThaHiC20911103180796	CGCTGCCATGCTTCCCGGTAAAACAGTCGGAGATGTGATCAAACAATACAGAGAGCTTGAGGAAGACGTTAGCGACATCGAAGCTGGTCTTATACCAATCCCTGGTTACGCCTCTGATTC	1	+	Chr2:15945306-15945425
Chr2:15945477-15945656	AJ_ArThaHiC20911103180807	GGCGGAGCATGAGAGGAAGAAAGGTGTTCCATGGACAGAAGAAGAACACAGGTAAACTTAAATCATCTCTCTACGTTAACGTCAATGCTTTTCTTCTCTAGATTTGGACCCCTTTACACT	1	+	Chr2:15945537-15945656
Chr2:15996809-15997026	AJ_ArThaHiC20911103180895	GGTCCTGATGTGTTGCTTTTTTTCAGTAGTGCGATCTGACGACTGTCACAAAGGCATAAACCCTTTATGCATGGACTAATCAATTAAATTAATTAAATAGCTTCTCTTATTTTTCTTATA	4	+	Chr2:15996858-15996977
Chr2:15997349-15997512	AJ_ArThaHiC20911103180903	TGTTACACTTAAAAATTACTTTTTTTTTGTGTGTGTTTGATATGCTTATTCACAGGCTGATATCATTCTTCGTGGATATGCTGGTTGGAATTCTAGGTTTGCCTTGAAGGTTCTTCACCA	3	+	Chr2:15997386-15997505
Chr2:16226930-16227133	AJ_ArThaHiC20911103180943	CTTTGCTAGGAAGCCTGCGATCCAGTGTTCCTCATCTCTGCGGGTGCACCGATTCTTAACGTACACCCACTTCCCCAGGTTTCCAAGATCCCTTCTTCTTCTTCATCCTAATTCCTACAA	1	+	Chr2:16226979-16227098
Chr2:16227599-16227801	AJ_ArThaHiC20911103180967	AAACAGCTCCTGATGATTGATCAGTTGTGATGGGCAAACACTTTTTGGAAATCATTTGTGCTTGTTTTTTATGCAGTTTTCCTATTGTTGAACCTGCTCCGGGTCATACAAAGCTTCAGC	1	+	Chr2:16227648-16227767
Chr2:16234150-16234368	AJ_ArThaHiC20911103181067	GACTCGTTGAGCATTACTCTGTTTTTAGGACTATGTAGAAGATTATGGGATCAATGTACCGTTTAGAGCACTACAAGCTTTAGGTTGTAAAGTGGATGCTGTGACACCGAACAAGAAGAA	1	-	Chr2:16234165-16234284
Chr2:16234424-16234614	AJ_ArThaHiC20911103181073	TGGTGTGAAATGCACGGCGTTTGAAAGCATAAAGCCTTTGATCGAACTCTCCGGCGGTGAGTGGTGGCAACAGCCTGGGATTCAGAGCATGTTCGAGATCACCGATTGCGTTAAAGACGG	1	-	Chr2:16234459-16234578
Chr2:16244032-16244247	AJ_ArThaHiC20911103181372	ATTAATGTGTTAATGAATGCAGGTAGAGTTCTGGATCTGTCTCTTGTTGACGATACTGGGTTACATCCCTGGGATCATCTATGCTATCTACGTTCTTGTCGGATGATGACCAAATTCTCT	1	-	Chr2:16244068-16244187
Chr2:16244286-16244464	AJ_ArThaHiC20911103181376	AAGCAGTACACGTGTCAAACACCACTTCTTTTACTTCTTGACCAAACTTTCACACCACTTCCCTTCTGTCCACAAAACCTCTCTTTCTTGTTTCTGTTTCTGTTTCTCTTCTTCTCCAAA	1	-	Chr2:16244345-16244464
Chr2:16249801-16250044	AJ_ArThaHiC20911103181565	GATGTGAGATTCTAACAAGTCATTTGGAGATGATGATTCTTTCGTCCATCTCAAATTGAAATCCACTGAAAGATAAGCAAACATATACCCTACTTGGATCAAATGAGATACCATGTTAAG	3	-	Chr2:16249889-16250008
Chr2:16250044-16250290	AJ_ArThaHiC20911103181579	TTCTCTCTCTTTTTCCTCTAGTCTTCACTTAACTTAGTAATCTTTGTGCAACAGTCTAATGGGGAACGTAACGATCTACTTGGTATGTATGACACACTTAAAAAGATGGTCCTAATTCTG	3	-	Chr2:16250111-16250230
Chr2:16257370-16257585	AJ_ArThaHiC20911103181657	AAAACTAGTTTTTGTTTTTCCAACTTTCTTGGATCATTAAATAGGATTGCTCTCTCTTCAAACGTATTTTTGTTGGATCTCTCCTCTTCAGTTCTAGAAGACTTTTTTTTTTTTCCTTTT	5	+	Chr2:16257419-16257538
Chr2:16274348-16274572	AJ_ArThaHiC20911103181758	AGCTACACTGTTGGTTTGGTATTGTTTCGTTGTCAAAATGGAATGTCGAATTTGATACCTTTTTACTCTGTTGCTTATTGTCCTCATAGATCTCGAGCTATTGAATTACACAAATGCTAT	3	+	Chr2:16274349-16274468
Chr2:16456129-16456299	AJ_ArThaHiC20911103182360	TCGTCTTGTTGATGATGTCTCAACTCACTACACAGCTATTTGCGGTAACGTTGACTTTGTGATGGTAAAAGTCAACTTATTGATTGATATTTTTGTGTGACAAAAAAACGTTGTAATGGA	3	+	Chr2:16456166-16456285
Chr2:16492567-16492768	AJ_ArThaHiC20911103182661	GGTCATGCATGCATGTATGCTTTTACCTATACGTACGTACTTGTAGAGACTTGTGTCTACGTATTCTTCACGCAGAATATGTTAATCTTCTTTTTCTGATCATGTTACTTTAATTTACTT	4	-	Chr2:16492613-16492732
Chr2:16492768-16493013	AJ_ArThaHiC20911103182671	AGATATGGCTTTAAAAACATGGAAGCCATTCATAACTGTTGTTTCTCTACAATTTGGATATGCTGGATTGTCGATCATAGCGAAATTCGCACTGAACCAAGGCATGAGTCCTCACGTTCT	1	-	Chr2:16492834-16492953
Chr2:16496969-16497172	AJ_ArThaHiC20911103182802	CACTTAATTTAAGCTTGGTGTGTTTTTTAAGTTTGAGATTTAAAATATTATAGGAAAAAAATATGTATCCCATTGATTTGGTAAGCTAGACGTGGTGATCCAGTTTGAGCACGACTTCAA	4	+	Chr2:16497006-16497125
Chr2:16498401-16498644	AJ_ArThaHiC20911103182904	CATTCGTCTCTCTTGCCGTTTTATCCGTTTTCTCATCCCTTGCTCTTTCCAAACGACCAGTTCCAGTCTCATAAACACACATATGATCATTGTAACCCTACATTATGCTTCCTTCATTTT	1	-	Chr2:16498477-16498596
Chr2:16501940-16502130	AJ_ArThaHiC20911103183119	AATTGTTAATTAGTTAGTGATCAATGAATGAGATGTTCTTGTTCTTCTCTGCAGGAGAATTCTATGGTTTCTTTGGTTCAAGGAGTTCTCAGTTTCCCATTGATGAGAATGGGGTAATTA	3	+	Chr2:16501977-16502096
Chr2:16631162-16631355	AJ_ArThaHiC20911103183768	CCTAAAGCTTCAAACGACAAGATCATGGGACTTCATGAATCTAACATTAAAAGCTGAGCGAAATCCCGAGAATGAGAGTGATTTGGTTGTGGCTGTCATCGATTCCGGCATTTGGCCCTA	1	+	Chr2:16631199-16631318
Chr2:16704750-16704972	AJ_ArThaHiC20911103184064	CTTTTTAATTTACCTACAAAATAGCAGATCGAAAGTTCTTTTGCTTTATCATATTGTAACTCTATTTTCTATCTAAGTATTCATTGAAATTATACGACTATGCAATTTCCCTTTTTTCCT	5	+	Chr2:16704811-16704930
Chr2:16813701-16813859	AJ_ArThaHiC20911103184240	TCTTTAATGTTTACGATCATGTTCTTGGGAGTTTGATCTCCGTTTCGGATTATCAAGATTCTCTACTAACCAAAGTCGAAGTTTTTGTCCAGGTTAGTTTCAACGTTTACTTTAAAGTTC	3	+	Chr2:16813726-16813845
Chr2:16813895-16814085	AJ_ArThaHiC20911103184246	AATTTCCTACGTACATGGATCCCACTCATTAAAGTTATTCACTAGAGTAAGACCTGTACGCATTTGCTTATATAATGATTAGATTTTACTGTTTTCATTTCAATTTGCTTTCTGCTTTTT	4	+	Chr2:16813932-16814051
Chr2:16817691-16817897	AJ_ArThaHiC20911103184287	CAGGAGCAACACCGAAGCTTGTTCTCCAATTGATGAACGTCAAGGGGCTAAGTATTGCCCATGTTAAGAGTCATCTTCAGGTTTTGCAAATATCCACATACACATAGAGTATATATCTAT	1	-	Chr2:16817778-16817897
Chr2:16817897-16818097	AJ_ArThaHiC20911103184297	CTGCGATGGACGCCGGAGCTCCATATTTGCTTTCTTCAAGCTGTGGAGAGATTGGGTGGCCCAGATAGTTGAGTTTCAATTATATATATGAATCAATATCAAGATCATTGCATATGTGAA	1	-	Chr2:16817966-16818085
Chr2:16818569-16818807	AJ_ArThaHiC20911103184309	ACATCTTATGACTGAAGTTACTAATGTTTAATGAAATTAAAAGTACCATTTTTGTCATGAGGTGTAATTCTAGATCTATCTTTCCCTAAGATGTATATAACTGTAGAAAAAACCATTGGT	5	-	Chr2:16818628-16818747
Chr2:16824095-16824328	AJ_ArThaHiC20911103184321	TCTTCTGCTCACAACACTTACTGTTGTTGTTGTTGTTGTTATTGTTCTTCTCGATTCACTCGATCGATGTTGTTCAAAATGCGTTCTTTTGTGGCTTTTGTGCTCCTTCTGAGCTGGTTC	1	-	Chr2:16824137-16824256
Chr2:16840823-16841047	AJ_ArThaHiC20911103184466	TTGTCTTCTTCATCGTCTTATTCCTGAAGATCAGAAATCAATTAAAACCAATGGTTCCCTCACTGTCTTCACTGCCAAGGTAAACCTATCTACTTAAACTTATTCAAAATTCTCACCTTT	3	+	Chr2:16840884-16841003
Chr2:16841047-16841270	AJ_ArThaHiC20911103184472	GGGCACCGTTTCTTCTAGAATCGAATTCAGACGATGCAATTGTCCATAGAATATCGGATAGGGTTGTGAGAAAAGGATCAATTAACAAACATGGTCGTCACTGGAAAGGAGTCGATATAA	1	+	Chr2:16841060-16841179
Chr2:16886997-16887234	AJ_ArThaHiC20911103184936	TATCTACATATATAAATCTTGTTATTCACACACACACACATGATCTCACACATACAATCGTAATCAATATACATATAGATTATTATTATTATTCACTCTGTCACGATTTCGATCGTTCCC	5	+	Chr2:16887058-16887177
Chr2:16887410-16887584	AJ_ArThaHiC20911103184944	GAAAACGATACATCGATCATAATGGATGCATCAAAATATATCCAAAAGCTTAAGCAGAAAGTCGAAAGATTCAACCAAGACCCTACTGCAGAGCAATCTTCAAGCGAGCCCACGGATCCA	1	+	Chr2:16887435-16887554
Chr2:16889303-16889483	AJ_ArThaHiC20911103185019	TTTGATTCACAGAAAATGGCAAACAAGATTGAATTCATTGATTCATTTGCGAAATACTGGAAAGAGAAAGTTGGAGTCGATGTACTGCTTAAAGCAGGGGACCAAACAGATCCTATCCCT	3	-	Chr2:16889340-16889459
Chr2:16903980-16904204	AJ_ArThaHiC20911103185359	TTTATCTATAGTAAACTACTCAGCCCGCGGTCCATTCGTTAGCAACGGTTTAGTCGTTTACATTTATATGATTTCCAAAAATTATGATCTGTAAATTTTTTGAATCATATAAAGTTGAAT	5	-	Chr2:16904037-16904156
Chr2:16948114-16948285	AJ_ArThaHiC20911103185543	TCGCTTCTTCTTCGTCTACTCTCTCTTCTCGCTTGACAACTGTATCATCGTCCATGGCTTCTGGTGACGAAGGAGCTGTTTTCAATTTGTCTGATTCTAGCCTTCTTAAGATCCTTAAAG	1	-	Chr2:16948142-16948261
Chr2:17064824-17065069	AJ_ArThaHiC20911103185995	TACGATTAAGGCTAACATGGAAGGTTTAATTTGAACAGGCCGGTGATTGATCAGAACTTATACTATATCGGTCTAAAACTCACATCACCAACGTTTTCCTCCGCCGTTAGCAACATCGTG	1	-	Chr2:17064866-17064985
Chr2:17065069-17065220	AJ_ArThaHiC20911103186001	CGCTCTTCTCTCCGAAAGGTACATATTTCTTCTAAAGAAATCGATTCTCGCAAGACTTAGATTTTTTTTTTTTTTTGGTAGTAATAATTATGTATTGGGGATTTTTTTGTAGGAAAGTGA	4	-	Chr2:17065089-17065208
Chr2:17070905-17071070	AJ_ArThaHiC20911103186066	GTTGCTTGATTCTTCTCTCAAACTTGTACAAATCTCTCTTATTTGCTGTTTTTTTTTTTTTTTTTTGGTGTAAAAGAGAGAAGAAAATACACGTGCGAGATTCCTCCGGATCTCTTGATG	4	-	Chr2:17070927-17071046
Chr2:17105932-17106110	AJ_ArThaHiC20911103186144	CCTTACAGGATTTTACATTTCTCTTCTTAACATCATCGAGAGACCCCGGGATTATCCCTAGAAACAAAGAAGCACCTGAAGCAGAAGGGCTTGATATGATCACTCAATCCTCAGAGTGGG	1	-	Chr2:17105955-17106074
Chr2:17106110-17106346	AJ_ArThaHiC20911103186152	CATCGTCTCTCCTTCTGACAACAGCTATGATTGGAGGTCCTGCTCTCACTTTCTGCATACGAATGGTTTTTTTGATCGGAAAACGCTATCCTTTGTTCCACTCTCTTATATTGTTGGGTG	1	-	Chr2:17106167-17106286
Chr2:17111678-17111858	AJ_ArThaHiC20911103186470	CGTACGAAGTTTTGAATGATGATCTGAAACGCGCGTCTTATAACGCTGGTAGCGATTCTGATTGCTTTCGCCGTACGAGCGGTTCGTATAGTAATCCGTATGGAAATCGTGGTGGCAGAG	1	+	Chr2:17111703-17111822
Chr2:17137972-17138151	AJ_ArThaHiC20911103186608	GGCGGATAAGCTCACTGACGATCAGATTACAGAATACAGGGAATCTTTCAGGTTATTCGACAAGAATGGTGATGGTATGGTTCATCAACTCTTTCCATTTAATCGTAATGTTGGATCATG	1	+	Chr2:17137997-17138116
Chr2:17150303-17150496	AJ_ArThaHiC20911103186655	TTCTCAAATTTTGAAGCTTTTCGTTTCGAATTGACAATTCATGGGGATCTGTCATGGAAAACCCGTCGAGCAACAATCAAAAAGCCTCCCAGTTTCCGGCGAAACTAATGAAGCTCCGAC	1	+	Chr2:17150316-17150435
Chr2:17150808-17150978	AJ_ArThaHiC20911103186683	AAAATCAATTTCTCTTAATTCTGTATTCGTTATGTTGTTTTGAAATATATGACAATGATTTCGAATTCTAGTTTTATCGCCATGTGTTTATAGAAGTATACAGCTTGTTTCTCGACCCCG	4	+	Chr2:17150857-17150976
Chr2:17154403-17154575	AJ_ArThaHiC20911103186736	GATCTCATCTCTGAGAAAATACCTGTGATCTTGGATGACTCGGAAACATGGCACATAATGCTATCGACGAGTATGAAATTGAAAGAACGTGGGAGTGCGCATGTATATGGGGCAAACAGG	1	+	Chr2:17154440-17154559
Chr2:17158511-17158741	AJ_ArThaHiC20911103186832	ATTATTTACATTAGATATCTGAGTTGTTGTTTGAATTCGAGAAGTTCCCGGAAACATCCCTCCGTAGAAAATTCATCGGAGGCGACTTGAGGAGAAACACGGAAGCTCCGATCTCACAAT	1	-	Chr2:17158598-17158717
Chr2:17165481-17165707	AJ_ArThaHiC20911103187039	TATAGGTTTTGATGAAAACCCTAAAACTATAGATGGTTTATTCTTCGTGATCGGTGTTTCAGTGCCGAAACAAAACATTCATAGTTTAAAATTCAGAGAGAACCAATGCTTCCTAAAGCG	3	+	Chr2:17165566-17165685
Chr2:17165707-17165953	AJ_ArThaHiC20911103187069	GTTATGTAATAATTAACCTCAAAATCCCAATTTGGTGGTAGTGATTTTGTGATCAGTTTAATCTCTGGTGTAAATGATCACAAACGGAAAAGAAATAATAATCCATATAGAGCTTTTAAG	5	+	Chr2:17165768-17165887
Chr2:17198650-17198806	AJ_ArThaHiC20911103187231	TGCTAAAAGTTGTTATTCATTGCTTTTGCAATTTTGGTGTTGATACAAACAGTGATATGTTTTGTTTTTTCTAACGCAAAGAAGGAAAAAAAAATCGGTCCCAAGTAACATAAACTGAAA	5	-	Chr2:17198675-17198794
Chr2:17199089-17199265	AJ_ArThaHiC20911103187251	ACCGAAACAGCTTCTAGAGAGAGACAAAAAAGAACAGAGTAACTATCTAAAACTCAAAATGTGTGCACTTGTCCCTCCATTATATCCCAATTTCGGCTGGCCTTGCGGAGATCATAGCTT	1	-	Chr2:17199122-17199241
Chr2:17234368-17234533	AJ_ArThaHiC20911103187363	GATGCGATCCCTCCTCCACAAGGATTCCATCTACGTCTGCTTCTGCGATAGGGAGAATTATTCGACTGATGCCACCTATCTTTGGTTCACTCTCCGTCCCACGACAGCGACGATGGAGTA	1	+	Chr2:17234393-17234512
Chr2:17234533-17234762	AJ_ArThaHiC20911103187373	CGAGTTGTGGATCCTTGATACCCGGTCTGGCAAGTTACGTCAGGGCCCGATCAAGCCGGAGTTCCTACGAATTGCGTCTAGCAGCGCCGTGGGAGTATTCGACGGAAAGATACATGTGAT	1	+	Chr2:17234618-17234737
Chr2:17251924-17252125	AJ_ArThaHiC20911103187532	CCTTGCCTGGGACGTTGGCGCCGGAAGCGGCCAAGCCTCACGATCGGTATAATAGTGTTGTTCAAATCTCCAAATAACTCATGTTAGTCTTTCAATCTTGATTCAAAATTCTATATCATT	1	+	Chr2:17251949-17252068
Chr2:17252125-17252315	AJ_ArThaHiC20911103187542	TTACGAGATCACTCCACCGACGATGTCTTCATCGGAGATCGAGAAGCTAGTAGCACCTGAATCATCAGTTGATTTAGTCACCGTCGCTCAAGCCCTTCATTGGTTCGACCTCACGAACTT	1	+	Chr2:17252174-17252293
Chr2:17252345-17252565	AJ_ArThaHiC20911103187553	GGCTTGTGGAGGATGGGTACAGAGGAATTGAGTTTCCGTTCGAGAAAGTGGATAATGATGAGTCAACGGAAAGTCAAAGTTTTCCGGTGAGGTTTGTAACGGAGAAAGAAATGGTGTTTG	1	+	Chr2:17252442-17252561
Chr2:17293367-17293583	AJ_ArThaHiC20911103187697	CAGGTAGGGTTTAGCTGTTGAATTAGTCTCTGGTAATTGGAATATGGAAACCATCCCCAATCTGTATCTTTAGATTGTTGCTTTAGCTAGCTAGTTACTGGGGCTCCAACATGATTATGA	1	-	Chr2:17293464-17293583
Chr2:17294487-17294734	AJ_ArThaHiC20911103187851	TTTTATTGTTTAGATCCCAAGGATGGCAGAACTTGCTTTTGACTTGGTCATTGAGATACTTGCAAAGGTTCCGGTTAAATACTTGCTACGGTTTAGATGTGTCTGCAAAAGCTGGCGTTC	1	-	Chr2:17294495-17294614
Chr2:17295810-17295976	AJ_ArThaHiC20911103187869	AAGCTGTTCCTCTGTGTCTTACACTAGAGATAAGATCAGTATATCGTTTGGTGATGTCTACGGCAACGAGGTTAGTTTTTTCCTTCTTTAAAGTCAATTCTTGGTTTTGATCTACAAAAT	3	-	Chr2:17295833-17295952
Chr2:17296096-17296258	AJ_ArThaHiC20911103187875	GTTCATCGACTTTTTCAACTCAAAACAAAATGCTCAGATTAGCGATTCCTTTGTTTCTTTTTGCATTATGCTCTTTCACATTATTTTCTTCTGCAAGATCCTTCATCACCACAAAACCTC	3	-	Chr2:17296103-17296222
Chr2:17298291-17298521	AJ_ArThaHiC20911103187988	GGTTATTATTCAACTTCATGTCCAAAAGCTGAGTCGATAGTTAGATCCACTGTTGAATCTCACTTTGATTCTGATCCCACAATTTCCCCTGGCTTGCTTAGGCTTCATTTCCATGACTGT	1	-	Chr2:17298342-17298461
Chr2:17362982-17363231	AJ_ArThaHiC20911103188097	CTCTTTGTCCTGCTTCAGATCTTTTTTGATAGCTTTTTGAAGACTTCTATTTAGATGTATTTAGACGCCTCAGTCGTCACCGTCGCACCCGGAGGCTTGTTCGAGTTTATTCCAGTTTGG	1	+	Chr2:17363079-17363198
Chr2:17395687-17395895	AJ_ArThaHiC20911103188374	TCAGCTGAGGTTTCTCTCTTTTTCTTTGCTCCTCAAAACTATGTCGTTTTCATGCTTATTCACTGCTCGTCTTAATGGGTCTTCTTCTCCTTGATGCTGAATGCAATTTTTGTTTTTAAA	3	-	Chr2:17395776-17395895
Chr2:17407195-17407445	AJ_ArThaHiC20911103188547	ATCTTCAAGACAACTTAATCACATCATCTTCTTCATTATCATCATTGGATGGATCCATAAGCATATATATATGATCATGTCATTTGCTCGTCACTTCAATTTCCCTTCTTCAAAGAGGCG	3	-	Chr2:17407266-17407385
Chr2:17469300-17469471	AJ_ArThaHiC20911103188602	GTATCTGTGCACCGAGATCGAGACCGGAGAGATTTTCGCATGCAAATCAATCTTAAAGAAGAAGCTGAAAACGTCGATTGATATAGAGGACGTTAAGAGAGAAGTTGAGATCATGAGGCA	1	-	Chr2:17469328-17469447
Chr2:17472259-17472467	AJ_ArThaHiC20911103188690	CTTCTTCTTTTTAGACGATCACAATTCCTAAACCCTATTTCTCAGATTATGCTGACTCTTTACCATCAAGAAAGGTCACCGGACGCCACAAGTAATGATCGCGATGAGACGCCAGAGACT	1	-	Chr2:17472312-17472431
Chr2:17499608-17499785	AJ_ArThaHiC20911103188955	AATTGTCTGATTCGATGATCAGAGAGTTTACTCGTATGCTTCTCGAGGGTTTAGCCACGATTCACAGACACGGCTATGTTCACTGCGATCTCAAACCCGAAAACATCCTTGTTTTCCCTA	1	+	Chr2:17499633-17499752
Chr2:17502421-17502658	AJ_ArThaHiC20911103189071	CCAACAGTTAAAGAAAGTCTCGAATAAACCCCTAAAGGTGAAGATTGTTCCTCCGAGACCCCCAAGATCCGATTTTGTCCCCGTTCTATAAACTACTGAAGTTAAACCATGTTACTACTC	1	+	Chr2:17502458-17502577
Chr2:17507343-17507541	AJ_ArThaHiC20911103189082	TCATTCTTCTCAAACTCACTCTCCCTGATCTCTCTCTTCCATGGACGAAACCAACGGACGAAGAGAAACTCACGATTTCATGAACGTCAACGTTGAATCCTTCTCTCAGCTTCCTTTCAT	1	+	Chr2:17507380-17507499
Chr2:17507541-17507732	AJ_ArThaHiC20911103189088	GCTCGTCGGTGATAACTCCGACAACTTATCCGCAGAACCTTCTGATCATCAAACCACTACCAAGAACGATGAGAGCTCTGAGAATATCAAGGACAAAGACAAAGAAAAAGATAAGGACAA	1	+	Chr2:17507554-17507673
Chr2:17582995-17583210	AJ_ArThaHiC20911103189597	CTCCACATAGGTAAGTATTTAACCAGTTTTGCTTTACTGTACTTGTTAAGTTGTTGTGATGAGATTGGAAACAAATTAAGATCAGTCTTTTTTGTTTCATTTGTTTGATCATGCAATAAA	5	+	Chr2:17582996-17583115
Chr2:17583237-17583446	AJ_ArThaHiC20911103189612	AGATCAACAATGTGAAAAGCAGTAATGTTACGTGATTGATTCTTTGTTTTAATCTGGATATAGTTCGAGGAATGACATAATGATTGTGTTCTTATGAGCTGGTTTATAATGTAACAATGT	4	+	Chr2:17583310-17583429
Chr2:17583446-17583675	AJ_ArThaHiC20911103189623	GTGGAAGCGGTGATGAAGAAAAGATTCCAGCTTACAGGAGAAGAGGAAGACCACAGAAGCCGATGAAAGATGATTTCGAAGAGGAAGAAGAAGAAGATGATGAAGAGATGGTAGAGAAAA	1	+	Chr2:17583543-17583662
Chr2:17647872-17648101	AJ_ArThaHiC20911103189943	CCAGAAGATGGTACGGCGTCGAATAACAATTCCGGTGATAGCTCCGGCAACCGGATTCTCGATCCCAAAAGGGTTAAGAGGTAACAAAATTATTCAAGAACATGCATGCACGTAAAAATA	1	-	Chr2:17647910-17648029
Chr2:17648683-17648863	AJ_ArThaHiC20911103189974	AACATAGCCATTTTGGTTACTCTTGTTCCGTTTTCTTCTTTCTTCCTCTCCTTCCTTTTTTCTTTTCTCTATCTTCTTCATATGGTTCATGACATTGATCTAATTCCACTTCCCATTTGT	3	-	Chr2:17648708-17648827
Chr2:17648863-17649098	AJ_ArThaHiC20911103189980	CTTTAGCCTCACTTCTCAAGACAGCTGTTTCATAGCTGTCCGATCTCAATATCTCCCTCCATGTGGCCCTACTCAGAGAGATAAATTAAACACTTTGATCACATCGAATTTATTATGTTC	1	-	Chr2:17648943-17649062
Chr2:17684355-17684529	AJ_ArThaHiC20911103190176	CCTCACAGAAGTAGAAGGTCTCTTCTGTACTGAATTATTAGAATGGTGTCATCCCAAAGTAATGCCTACGAACAAGCTTCAAGAAGTTTGTTTAGAAAATAATAAACTGATCATTGAAGT	3	-	Chr2:17684386-17684505
Chr2:17768083-17768244	AJ_ArThaHiC20911103190742	ATTATCATAGAGATTTAACCTCTCTCATGGGTTTTTTTTTGTTTGTTTTTGAGTAATTGATCTCGAGAGCTAGCTAAAGACACTCTCGCCGGAGAGACATGGCCGGGAGATCTTCGCCGG	1	-	Chr2:17768101-17768220
Chr2:17790860-17791064	AJ_ArThaHiC20911103190905	TCCACAAAAGAAGCTGTTTCAACCTCAGTACTCTCTAAGAGGTGGAAGAACATGTTTGTTTTGGTTTCCAATCTTGATATTGATGATCGTCAATCTGTGCCTAAGACTAAGCAAAACCGG	1	-	Chr2:17790897-17791016
Chr2:17820400-17820557	AJ_ArThaHiC20911103191185	CTATTTCTCTTGTGTTTATACTTCAGCTAGGGCTTATAGAAATGGAGGGTGGTGCGAGTAATGAAGTAGCAGAGAGCAGCAAGAAGATAGGGAGAGGGAAGATAGAGATAAAGAGGATAG	1	+	Chr2:17820425-17820544
Chr2:17820846-17821056	AJ_ArThaHiC20911103191208	GTAAAAAAGCAGTGAGGGTCTTCTCTGATCATTAATTAGCATCCCCCATACCTTGTTCCAGTCACTTTTTCTCCACAAATCCTTATAACAGTATCTATATATGTATCTATTTATGTCAGT	3	+	Chr2:17820895-17821014
Chr2:17909488-17909715	AJ_ArThaHiC20911103191398	GAGACGGCTCATTACATCAAGTGCCTTAGTATGCAGGTCAAGGTCATGCAGTGTCTCGTTGATGGCTTATCTCCCAAATGATCATCAATTAATCATCAACATCATCATCAATGATCGATG	1	+	Chr2:17909501-17909620
Chr2:17963988-17964175	AJ_ArThaHiC20911103191772	TCTATTAGTTGCGTACAACTAACGATGATCAACTTGAGTGATTTATATCGGAGATCGTGGGTAGTGATACGGGTCAACAATATAAGGATTTAGAGATCAATTAGGAATTGAAGTTAAACC	3	+	Chr2:17964013-17964132
Chr2:17989469-17989712	AJ_ArThaHiC20911103192016	GAGTATAAAGTAATTAAAGACCAGAAAATTAAGAGGAAATTTAGCTTACTGGATTTGACGAATCAGAGCAGGGATCTTCAGCTGCACGAGCACGAGGCCAAGAGATAGGGAAAGAGAGAG	1	+	Chr2:17989530-17989649
Chr2:17989712-17989948	AJ_ArThaHiC20911103192035	GATTCAGCTAACATTAGTGATTAGCTATTTGCTGGATTTCTTCGATTGCTTGTCGTCTCTATGTTTCAATTGTATTATGATTACGACACATTCTTGTTCTGATCATTGTCGATGAAAAGG	3	+	Chr2:17989713-17989832
Chr2:17989948-17990151	AJ_ArThaHiC20911103192049	CCTTATCTATGTGGCAGTGGAAGATGAGGATGATCCAACCACAAAGAACAGCAACAACACAGATGATTTTGCTATAGAGCCTCGTGAAGGGATTATATTTGAATCCGAGGATGCAGCTAA	1	+	Chr2:17989985-17990104
Chr2:17990151-17990302	AJ_ArThaHiC20911103192055	GAAGATCCGAGAAAGACGGAAGAATTCTTGCCCGGAGATTCGGTTGTAACAAAGAAGGTCATTGTGTTAGTATTCGTGGTAAGTTTGGATCAGTTAGGAAACCTAGACCGAGTACAAGAG	1	+	Chr2:17990164-17990283
Chr2:18062574-18062824	AJ_ArThaHiC20911103192187	ACAGAACAAATGGATGGTTTAAGCTCAAACTTTGGTTCTGGCGTTAGGAATTTGATCTCTGATGATATGTTCAACCCTTCCTCCGAGCTTATGAATTTCGACTCTTTGGCCGCATGGTGT	1	+	Chr2:18062635-18062754
Chr2:18069041-18069257	AJ_ArThaHiC20911103192469	TGAGGGTAAGGGTGTGCGACTTATAGGCTTCGATCGGTAGTTCTGATTTAGTCACGAGTGGAAAATTTGGTCCATTTCAGTTTCCTTTATCTCCAACTCTAGCATGTATTGGGATTTAAA	1	+	Chr2:18069090-18069209
Chr2:18069257-18069442	AJ_ArThaHiC20911103192477	TCACACTTTTTATGATCTCTAACAAGAATATAACAGATAAGTCTTAATATTCGGTTGGGTCATCTACATATCATATATAGCATGTCCGGTTTTAAGCCAATGTTGGAGGAGCTTAATCGG	3	+	Chr2:18069294-18069413
Chr2:18071718-18071917	AJ_ArThaHiC20911103192618	CAAGATCCATTAAGAGATTTCATCGTAAAGATAAGTGTTTTTTTTTTTTTTTGATGCAATTTTATCTCTTACTATACATTACCTAATTATGGCGTCGGCTTCAACTTTGTGTTGAAACTG	5	+	Chr2:18071779-18071898
Chr2:18081885-18082044	AJ_ArThaHiC20911103192831	ACACGTTAAGTATTTTAAGGAAAACAATTGGTTATAAGACCATATAAGATTAAACCTTTGATATTGTAGTAAGAAATGACATTTGACTTGATCTCAAGTAACTAAGATGATCCTAATCCT	5	-	Chr2:18081901-18082020
Chr2:18105088-18105279	AJ_ArThaHiC20911103193225	ACATACGGGTTTATATATAGATCATTTAATAATCTTATATTAATTGTAATCTTTTCCAAGTACTGTAACAATTTAGTTTCATTTCCATGTTTCTCTTACAGAAGGAAATTTCATCAAAGT	6	+	Chr2:18105125-18105244
Chr2:18105279-18105484	AJ_ArThaHiC20911103193233	CTTGTAATGAACTTTGGGTTTGATCTTTGTTACAGCGCTCGGCCGGAGATTGGTGCGTTGCTAAACCTTCTACGGATAACGAAAGGCTTCAAGAAAACATAAACTTCGCGTGTTCGAAAA	1	+	Chr2:18105328-18105447
Chr2:18105735-18105889	AJ_ArThaHiC20911103193251	AGGTTCGATCTTGTTGCAAGAAGTTAGAGGACTGTATCTGAAATTTCCTATTTAAAATCTAATGTTTGGATGTTTTAATTGGATTTCTCAACAGTTAAATGTTTGAGCCTAGATATGTGT	4	+	Chr2:18105748-18105867
Chr2:18106037-18106220	AJ_ArThaHiC20911103193256	TTTCAACAAGAGATATGGCTGTAGATCACCTAATTGTGTTGTGTTTAATTATCAGTTGAGGGTAGATATAGTTTTCTAATTGTGTGTAAATATTTATATCTTAGCATCATATCGACCAAA	5	+	Chr2:18106062-18106181
Chr2:18109006-18109161	AJ_ArThaHiC20911103193405	TTCTGATGATCAATACACAACTGTACTAGTCTTGAAGTTTCTCCATGCATAGATCTTAGAACTACCATAAAGGTTAATCCTTTGAGCCTGAAACAAAGGTTTGAGTTCTGTTTGATTGTG	3	+	Chr2:18109019-18109138
Chr2:18112380-18112629	AJ_ArThaHiC20911103193496	ATCAATCAATCAATGAGCATGTCTTGTAAAATCAACTGGTTGATGGTTCTGGTGATCATTGCTCTGTCTAATCTTGAAAGCTCACTTGGCAGGCTTGTTTTTGAGGGATCCGCCGGGTTA	1	+	Chr2:18112441-18112560
Chr2:18112682-18112875	AJ_ArThaHiC20911103193508	CTCTCCCACGAGAGGCATTCCTGGTGCATCCGCTGATCAGTACCTTGGTATCTTCAACGATACAAATGATGGAAATAGCTCCAACCATATCATTGCTGTGGAGCTTGATATACATAAAGA	1	+	Chr2:18112743-18112862
Chr2:18161659-18161819	AJ_ArThaHiC20911103193643	ACAATTCTCAACTGGTTCGATTCGTCGAACATTGAGCCGACAGTTCACGCGTCAGTCATCTCTTGACCCTCGTAGGACCAACATGAGGTTTAGTTTCGGTCGTCAGTCTTCTCTCGATCC	1	-	Chr2:18161688-18161807
Chr2:18161824-18162052	AJ_ArThaHiC20911103193651	TGACTTGTCGTCTTCTTCTTCTGACTCAACCTCCATTGACCAACCCTCCAAAGACGGCAATGTGGGTTTTATTCTTAATCCATTGATCTCTTGTTGTGAGGTTTTTTGAGAATTTGCGTA	1	-	Chr2:18161885-18162004
Chr2:18219154-18219334	AJ_ArThaHiC20911103194005	AGGCAGAGAGTGAAAAACTCCTCTCTCTCTCGTTAGGGCTTCTCTCTCACGCGCCTTTCGTATCTCTCTCGTCTCTAATCGCTAAACTCCTTCAGGCGAGAAAGCGAGGATCTTTTCGAT	1	-	Chr2:18219191-18219310
Chr2:18284098-18284347	AJ_ArThaHiC20911103194090	AGGCTGGAGAGTGTCCCAAAAACACTGTTCCAATCAGAAGAACAAAGAAAGAAGATCTCTTGAGACCAAAATCCATCAGGAGTTTTGGGAGAAAGTCTCATCAAAGCATTCCAAGAACTA	1	+	Chr2:18284159-18284278
Chr2:18354121-18354344	AJ_ArThaHiC20911103194415	TCATGGCTTACACCGAAGATTACTTCTCTTCCTCCTGAATCTCAAGTCCTTGATCGAAGTAGTTTTCCTGATGATTTTGTTTTCGGAACCGCTATATCGGCCTTTCAGGTAATTTAAGAT	1	+	Chr2:18354158-18354277
Chr2:18354344-18354515	AJ_ArThaHiC20911103194424	CTGATACAATTGATCCTTCACTTTCTTATAGAGTTATAGTTGTGAGACGTTGAAAAATAATACGACATTCTTTGTAGCCGTATATAATTATCAGTTCCTTTTCGATGTCTGAATATTCAA	4	+	Chr2:18354369-18354488
Chr2:18354515-18354702	AJ_ArThaHiC20911103194428	TGGTGGCGTTTTGGACTTTTAGTGGGTCCCTCTAAACGAGATTGAATTTTGGATCGACCATGTAGCTTCATAAGCTTAGATATGATCATAGGTTGGCTCCAATCCGAAATTTCCAATTAA	1	+	Chr2:18354516-18354635
Chr2:18365206-18365367	AJ_ArThaHiC20911103194618	AGATCTGTGATTGATTTCTTGTACAGGAAGATATTAAGAGAATGAAGGATATAAACATGGATTCGTTTCGGCTTTCCATTGCTTGGCCACGAGTTCTACCTTGTAAGTATATCATCAGTT	3	+	Chr2:18365231-18365350
Chr2:18365511-18365678	AJ_ArThaHiC20911103194622	TCATTGGGACATACCACAGGATCTTGAAGATGAATACGGCGGTTTTCTAAGCGAGCAGATTATGTAAGCAAAATTCATTTATTTGAAATTTGAACAAGTTGTGGAGATATTTATGTTAGG	3	+	Chr2:18365524-18365643
Chr2:18524818-18524997	AJ_ArThaHiC20911103194887	GAGAAGTCTATTTGCACTTGTCTCTGCTTCTCTCTTCTTTGTTGATCCTGCTCTTGCTTTTAAGGTAACCTTTTGTTCTACTTATCTCCTTTTAATTCTATTCTTGAATCTGTAGTGAAA	3	+	Chr2:18524819-18524938
Chr2:18524997-18525153	AJ_ArThaHiC20911103194894	CAAGTGATGATCAGATCACCATAGATAAGTTATTGTGAGCAAACCTTTCGTTTTTTATGGAAATTTTATCATCCTATCTAAATTGGAAACCATTGAGTCTTAAGATTAGGCACTTTCTTT	4	+	Chr2:18525010-18525129
Chr2:18705500-18705660	AJ_ArThaHiC20911103195186	TACTTGGCTGGAATTATCTGTCAGTTTGTAGGATCTTGAAGCTTCATAGCTATGTAAATATGTCATGTTTCCATGCATCTTCTATAGAAAGTCAACCATATATTTTATGATCAATAACTA	4	-	Chr2:18705517-18705636
Chr2:18728400-18728582	AJ_ArThaHiC20911103195416	GGAGGAAGACGATCAAGAAGAGCAAACAGCTGGAGCGGTTGCTAATAATATCGATGGAAACGCAACAATGGGTGGTGGAACGCAAACGCAAACTCAGACGCAGCAGCAACAGCAACAACA	1	+	Chr2:18728437-18728556
Chr2:18753865-18754089	AJ_ArThaHiC20911103195544	AGTGGAGAGTGAGAAAGATCCGGAGAACATGAATGATAAGTACCTGAGGGATATAATTCTGAACTTCATGATTGCTGGTAAGGACACAACCGCTGCACTACTCTCTTGGTTCTTGTACAT	1	+	Chr2:18753938-18754057
Chr2:18774745-18774965	AJ_ArThaHiC20911103195555	TTCAAACATAAACGCAAACGTAACAAAGACACCAATTAGAGTATAATGGATCGCTGTTATGATTTGTCTCAGGATGTTGAGAAAACTGTCAGTGACTCTCATGTTCTCACCGCAGCGTAC	1	-	Chr2:18774762-18774881
Chr2:18777613-18777833	AJ_ArThaHiC20911103195622	CTTTTTGTTAAAAGGCAATAAAGACCCTAAAACAGTAATGTTCTTGATGGATCGTTGTTATGCTCTGTTTTAGGCTGTTGAGAAGGCTGTCGGTGACTCAGCTCTTGTCACCACAGCGTA	1	-	Chr2:18777630-18777749
Chr2:18804866-18805030	AJ_ArThaHiC20911103196039	AGGGTTTTCCCTTTTAGATCAGTGTGTAAGATATATAACTTGAGTTCTTGTCGTAAGAAGAATCTTTATTTGTTGAATCGAGCTAATGATCTCCCATTTTTGTTTTAATTGAATTTGTAG	4	+	Chr2:18804879-18804998
Chr2:18869756-18869951	AJ_ArThaHiC20911103196150	TACAGCTGCTAAGGATGTATCCTGGTCAAGTCCCTGATCTTGAGCTTCTCTTCATGTGCCATGACTCACCTGAAATCTGGAGAAGAGACTATAGGCCAAGACCAGGAGTCAATGTGACGT	1	+	Chr2:18869781-18869900
Chr2:18907223-18907454	AJ_ArThaHiC20911103196457	TTGGACAATTCGAATATCTGTATTATCTCCAAACGTATACGGCTGTTTCTGCTTTTTTTTTTTTTTTTTTTTGCTGCTTCATTGGATCAGTTTTAAGATACCTCTTTTGTTTTGCGTTTC	4	-	Chr2:18907287-18907406
Chr2:18958936-18959117	AJ_ArThaHiC20911103196670	AGAGAGAGAGAGACAAAGAGAGATCTGATCCTTTGAAGAAACAACACCAAAAAAAAAAAAAAAAGAATGGCATCAGCGGATGAAAAGGTGGTGGAAGAGAAGGCTTCGGTGATTTCAAGC	1	+	Chr2:18958961-18959080
Chr2:18961710-18961879	AJ_ArThaHiC20911103196797	ATTATGCTTGATCGGATATTATCGGATCCGGGTTTGGGTCGAGAAATAAGTAGGTCGGGTCTTGTGAACGTGTGGAGTTACACTAGGGTTGGTGGTAAGGTGAAGATTATGGGGATCGTG	1	+	Chr2:18961735-18961854
Chr2:18962107-18962304	AJ_ArThaHiC20911103196803	GTTTTCTTCTTCTTGCAAAATTTGTTTTTGTACAGTTGATCAGATTTTGAATGGAGTGAACATAAAGTCTACGTTAAATAAATAATATCAACGTTCCAAAAATTGACCGATGACTAATCC	5	+	Chr2:18962132-18962251
Chr2:19053855-19054079	AJ_ArThaHiC20911103196944	GGAAGTGTAGCATTTTGGATTCGCTTGTGACTTGAATCTTGAATATTAGGTGAAACCGCCTTGGATCTTCTCGTTGATCTTTGTCGTGGACATTTTTTTTTGTAAAGCTTAGTAGATTCT	3	+	Chr2:19053880-19053999
Chr2:19054091-19054292	AJ_ArThaHiC20911103196955	GAGATGGCTTTGCTATATACTCTTGCTAGATCTGTTTGATTTCTTAGATTCCTGATTTAACGATTTCCTTCTAATTTGATTATCCAAAATCTAGAAATGGTAAAAGTTTCTTGAGTTAAG	4	+	Chr2:19054128-19054247
Chr2:19058838-19059081	AJ_ArThaHiC20911103197142	CATCACTCCTTCTTCTAGTGGTTTCGGCAGAGGAGAGCTTAATGAGAAACATAAAGATATCGCTTTAAGATACCTCGGCTCATACTTTCTAATCGATCTTCTTTCGATTCTCCCTATTCC	1	+	Chr2:19058851-19058970
Chr2:19079427-19079653	AJ_ArThaHiC20911103197162	AGCGAAGGCAACATCATGGCTATGAATCTCTTCTCCTCATCGTCGTCTTCTTCTAATCTCCAATCGCTTTCTTCGTCTTCTTCGCTCTCAAATCTGGCATCAGATTTACCGGTGGATAAT	1	+	Chr2:19079534-19079653
Chr2:19079653-19079811	AJ_ArThaHiC20911103197163	GCTGCGACGGAGGAACCGAGCAGATCTAATAAACAGCTACGATGGACGATTGATGAAGGTGAAGATGATTGATGATGATGATGATCAATTCCAGGTTGTTAACTTTTGCTAATCTCTGTT	1	+	Chr2:19079654-19079773
Chr2:19083316-19083485	AJ_ArThaHiC20911103197624	ATGTCCGGAACATTTTTTGTCCAGTATATCGACTACAGAAAGCAACAGATTTATATCAACGATCCTGAAAACTGTTTGGCTAAAAGGCTTTTAACCTTCAACATTTCAGGATCCCCTTTC	3	-	Chr2:19083342-19083461
Chr2:19206572-19206745	AJ_ArThaHiC20911103197872	TCAACGACGGGTTTGCAAAGATTAGAGTTTTAAGCGAGACTACGACTCCTAACGAGTTTAACGCAGCTAAGGTTTCTCTTGGCGTTCTTGGCGTTATCTCTCAGGTTAGATCAATTCAAT	1	-	Chr2:19206602-19206721
Chr2:19214115-19214290	AJ_ArThaHiC20911103198074	GTCATAGCTCTAACACTTTTTTTTTACTCAAAAAAGGTAACCCTTAAATTGCAACCGATGTTTAAGAGATCGTTAAGGTATGTCATGAGAAATGATTCGGATTTTGGGGATCAAGCCGTA	3	-	Chr2:19214147-19214266
Chr2:19261098-19261294	AJ_ArThaHiC20911103198150	ATTTTTTGGTCACACCCTTAAAGAGATCTGAGAGTTCTAAAGATGATGACAGATTTATCTCTCACGAGAGATGAAGATGAAGAAGAAGCAAAGCCCTTAGCAGAAGAAGAAGGAGCGCGT	1	+	Chr2:19261135-19261254
Chr2:19261294-19261464	AJ_ArThaHiC20911103198157	ACCGACTTGTGATCCCAAAGCAACACGCAGAGAGATTCTTCCCTTTAGATTCATCTTCAAACGAGAAAGGTTTGCTTTTAAACTTCGAAGATCTCACTGGCAAATCTTGGAGGTTCCGTT	1	+	Chr2:19261319-19261438
Chr2:19265654-19265896	AJ_ArThaHiC20911103198205	TGAAAAAAAAAACCTAAAACACCACATACAATATTGCAGGAGACAATGTATATGGATTGTGCGAGACAAGTGACGTGGCAAAATCGATGGACATGGCATTTGCTCCTGCGATCGAATCGG	1	-	Chr2:19265753-19265872
Chr2:19265896-19266129	AJ_ArThaHiC20911103198220	TGCAGAATTTCCTTACTGCTCCGATCTCAATACTACCTCCTTTTTACAGCGAACTATCGCTTCCGAGAAGCCCGATCTCATCGTCTTCTCTGGTACCAAATTCTTCAAATAATACAAAAT	1	-	Chr2:19265950-19266069
Chr2:19266180-19266355	AJ_ArThaHiC20911103198231	ATAGTCACTAACCTAAAAGAATTAATGGAGGAAACTCGGAGGAGGTTTGTCATATCCTCTGTTCTAAGTGTTTCTTTGATCTACTTATGTCTTTCGACATGTCACGTTTCCGCCTTCGAC	1	-	Chr2:19266181-19266300
Chr2:19314280-19314491	AJ_ArThaHiC20911103198448	CTTTGATTTCCTCTTGATGATCCTCGGGACGCTTGGATCTATTGGAAATGGTCTTGGCTTCCCTCTTATGACCTTACTGTTCGGAGATCTCATTGATGCTTTTGGAGAGAATCAGACTAA	1	-	Chr2:19314324-19314443
Chr2:19314558-19314719	AJ_ArThaHiC20911103198455	CAGCTCATAGATTTAGAAACTTATTACATATCTCCTCTGTTCTTTTAAATGCTTAGGATCGTGAGGTATCTGTGAAACTCTAATGGCTTCAGAGAGCGGCTTAAATGGAGATCCAAATAT	3	-	Chr2:19314576-19314695
Chr2:19477175-19477415	AJ_ArThaHiC20911103199034	AAGGTGTGGAAAGAGCTGTAGATTGAGATGGATAAACTATCTAAGATCAGACCTCAAGCGTGGAAACATAACTCCAGAAGAAGAAGAACTCGTTGTTAAATTGCATTCCACTTTGGGAAA	2	+	Chr2:19477236-19477355
Chr2:19485670-19485878	AJ_ArThaHiC20911103199044	CATTACGTTATCGAATGCATATCGATCCGTGCTCTTTATAAAGAAACCTAGAGTGTCTCCGTCTCTCTCACTACATTCTCCACTGTTCACATTCTCTCTCTCTCTCTGGATCTCTAGACA	1	+	Chr2:19485719-19485838
Chr2:19666928-19667110	AJ_ArThaHiC20911103199493	GAAACATTTATTATTACAAATTTTAGTATCCAACAAAGCATTCAAGCCCTTAAACCCCCCAAAACCTCCTCCGATCCCATTCTTTCGTTAACTGATGGCTGAAACGCCGGCTTCTCCTCC	1	-	Chr2:19666931-19667050
Chr2:19669084-19669302	AJ_ArThaHiC20911103199513	GATGAAACAGATCAGACACGTCATGATCATCTTCACCACCATGTGCCTATCTCTCACGTAGGTAGTAGTGGCCGGAGATCATCAGATCAGTTCTCTGAGTACATAAAGAAGGCAAAGATG	1	-	Chr2:19669135-19669254
Chr2:19669757-19669946	AJ_ArThaHiC20911103199520	CCCCTCCTGAGAGGAGTGACAGCTGATGCATGATTCTCAAATCCTGACAGGAACGTAACAATCCGAAACAAAAACAACGAAGAAGAAAGAAAGAAAGAAAACATAGTGGAATCAGAATCC	1	-	Chr2:19669815-19669934
Chr3:8629-8870	AJ_ArThaHiC20911103199736	TTTTCTTTTCTTTTTTCGGCTGTGCGTGCATTAGTTGTTTAGATCCACCGGCGAAATCACTTAAGGAAAAAAAAGGCTTGATTTTTCTTCTTCTCCTCTCATCTTTTTTGTCTTCTTCTT	3	+	Chr3:8690-8809
Chr3:9044-9244	AJ_ArThaHiC20911103199743	GAGAATCGAAAAGCAATCATCGAGATCGGAGAAGAAGAGGAATCGCGTAGGGAGGTGATGTTGTTTGGTTGGGGATTGGGTGGAATTAGGGTTTTATTGGATTCGATTGATCTGAATACA	1	+	Chr3:9045-9164
Chr3:9465-9676	AJ_ArThaHiC20911103199751	TCCGTCGGATCTACCACCTAAATGTTGTTTGCTCAGCTACGTATTTTGCATCTTGTTAAGTTGTTTGGATCCAATGTTGAAGTCAACAAAGTTTCGGCATTTGAATTTTTCTTATTTGGT	3	+	Chr3:9466-9585
Chr3:59767-59942	AJ_ArThaHiC20911103200050	CGACGTTGACATTTTTGATGGTGTAAACATGGAGAAGAATCTTGAGTTCGAAATTCAAACTATGCCAATACATCAAGAAGATGAAGCTTCTTTAACCAACGATGACGAAGAAGAAGAAAT	3	+	Chr3:59792-59911
Chr3:59942-60137	AJ_ArThaHiC20911103200058	AGCTTGGATTCAGCGCTCCAAGATTCGGTTACGATAGAGAATATTCAAACACAAGGAGTTGAAGATGACCATGTATACAAGAAATATTGCGAAAGAATGAGATGGTATGACATCCTCAGC	1	+	Chr3:59991-60110
Chr3:65803-65988	AJ_ArThaHiC20911103200143	CAATTTGGAGGGTGGCCCAAATCATCAATTTTCTTTTAAGGTATTTATTATTCAATAAAGTTTTATTCCGGAGTTATGCTAAAGAAAAGAGTGTCGATATCTGTATTTTGTGGACGATTT	4	-	Chr3:65833-65952
Chr3:73866-74054	AJ_ArThaHiC20911103200296	CTAGGTGGAAGACTAGACAGCTCGAGAGAGATTATGATTCACTCAAGAAACAGTTTGAGTCTCTTAAATCCGACAATGCTTCTCTACTTGCCTATAACAAGAAACTCCTTGCTGAGGTAT	1	+	Chr3:73879-73998
Chr3:138844-139086	AJ_ArThaHiC20911103200932	CATTGATACTTGCCAAAACCTTTCCCGATCGAATTTTCCCGCCATTCCTTGTTCCCAACACCCTAGTTTCGCGACGCAATGTCAGTCGAGCGAACTCCGGCATCTTCTGTAGTTCTGCTT	1	+	Chr3:138857-138976
Chr3:139790-139945	AJ_ArThaHiC20911103200994	ATAGTAGAGAGAAACAGAGTATTGCAGAATCTTCTGCCCCGAGTATTACTAATAAAATGGTTAAACCGATGTTGACGCAAGGCGTTGGTTCTCCGGATAAGGTTAGGTTTCAATTACCCG	1	+	Chr3:139803-139922
Chr3:139990-140203	AJ_ArThaHiC20911103201001	TACCTGACTACAGGAGACCATTTCGCCTTCTTCCATATGGCGTCAGTCCAAAACTAACTGATGATGAAATGACCACAATAAGGAGACTTGGTAGACCACTCCCTTGTCATTTTGCTTTAG	1	+	Chr3:140039-140158
Chr3:149602-149758	AJ_ArThaHiC20911103201058	GGATTGGGCCTAACTTAACTTATATCATAGTTTTGTTATATCGTAAGCTGAAGGTTTGGGCTTTAGTTCTGAGAATAGTGAACACTGAAAAATGGAGATTTAACAAAAAAATCCAAGGAG	4	-	Chr3:149627-149746
Chr3:165773-165942	AJ_ArThaHiC20911103201191	TCTCTGAGAATGAGTCATCAATCGCCGCCGATCGCTGAAGTTGATGCCACCGACGATATGCACGAGGCGTTGTTCGCGAAGCGAGGTTGTTGTTTCCTCATGCCCTGCCTTGCCTCATCT	1	-	Chr3:165823-165942
Chr3:188897-189144	AJ_ArThaHiC20911103201278	TAAAGATCCGGAAGCTTTACTAAGATATGCATTGCCTATTGACAACAAAGCCATCAGGGAAGTGCAGAAGCCTCTTGAGGATATCACTGATAGCCTCAAGATTGCTGGCGTTAAGGCTCT	1	+	Chr3:188958-189077
Chr3:201391-201611	AJ_ArThaHiC20911103201561	TTCCTCTGCCGCCTCGTTTTCTGCTCACAGTTCCAACTTCTTCCATACACACACATTCTCGGAAAAATCTCTATTGGATCGGTTTAATGGCGTTTCTTCAACAAATCTCCGGTTTAGGAG	1	-	Chr3:201444-201563
Chr3:202392-202597	AJ_ArThaHiC20911103201621	AGACACATAGACACAGCAAGTTTACAGGGACGCGAATCGTAAACAAGACGTAAAAAACAATGCAGGATTTTTCTTCAACGGTGTCGTATAGCCCAAGCTTCAGTTACTACGCTTCCGGTG	1	-	Chr3:202454-202573
Chr3:218245-218451	AJ_ArThaHiC20911103201745	TGGAGTTTGGTACCTTCTCAATATCTACTACAACATTTTCAACAAACAGGTTCCTTCTTTGCTTCATTTAATTAAACAGTCCATTTCAATGCAAGAAGCAGTACTCGAACCTATTATCAG	3	-	Chr3:218284-218403
Chr3:240037-240200	AJ_ArThaHiC20911103201884	TCAGGTCTATGGTGGTCTTGTTCACATGGTCAGTGTCTCCCCTCCTATCTCATACATTGCCGTTGGTTCCATCGGTTTTATGACTTTTTATCATCTTCTTCACTTTGCAGGATTTTAGCA	1	+	Chr3:240081-240200
Chr3:247500-247748	AJ_ArThaHiC20911103201977	TTCTTTGATGTCACATCACTTCTCTCCGTTGTTAATGACATCTTCAAGTCTCATGTCCCATCCATTGACTCCTCTGCTCCTAAGGTTTAGTTTACTTGTGCAACAATTAATCCCCATTTC	1	+	Chr3:247549-247668
Chr3:247748-247944	AJ_ArThaHiC20911103201988	TCTTGCGAGGTATATATGAAGCTTTCTTGTTTTAAGTAACGTTTGAGTCAGTATCTAAGTATCAATGTCTCTGACACAGATCGACTGCAAGTGTCTCCATGGCGGTGAGTCTCACGGTAT	1	+	Chr3:247785-247904
Chr3:273430-273669	AJ_ArThaHiC20911103202045	ACACCCTCTGGCAAATGATTGAGATGCATGAGATGTTTGAAGGGCAACGGTTCGATAGGTACCATGAGCTGGGTCAGGCAGCCTTTGGTAAAAAGCTTGGTTTGTACATCATCGTGCCCC	1	+	Chr3:273491-273610
Chr3:294855-295043	AJ_ArThaHiC20911103202102	GTTGGATGGATCGGGGCCGGATAGAGGAGTGCAGTGGGTGCTTATGGGAGCCCCTGGAGCATGGAGGCACGTCTTCGCCGAGAGGCTCTCCAAACTGCTTGAAGTTCCTCACATTTCCAT	1	-	Chr3:294876-294995
Chr3:313341-313504	AJ_ArThaHiC20911103202241	TACAGAGCTCCTAACCGAATCCCCGAGTCGGACGGTAGTCATTCGCCGCTTAGCTGCACGGAGAACCGTAGTGACGGCGAACCCCTCGAACGTGGAGTATATCCTCAAAACAAACTTCGA	1	-	Chr3:313361-313480
Chr3:351080-351271	AJ_ArThaHiC20911103202475	CAACTTATATCTCCCCGGATGATTGAATCTTTTTCTGTTTTTGCCTCTCTAGGCGGAACATTTGCTCTCTATTCCCTGCTTTGTAGGCATGCTAAGCTTAGCTTACTTCCTAACCAGCAA	1	+	Chr3:351081-351200
Chr3:373042-373261	AJ_ArThaHiC20911103202679	CCGGAAGATCACTCTTTTATTGGCTCACTGAAGCTTCTGACCTCCCTCTCTCCAAACCTCTCGTAATTTGGCTCAACGGAGGTTAATTTTTACCAACCATTTGTTTTCTTTTTATACATT	1	-	Chr3:373130-373249
Chr3:373261-373443	AJ_ArThaHiC20911103202691	TCACCACTCTTATGGCCATACTCGTAATGACATCTCAAGGAAGGATTCCAACAGAAGGAGGAGAGAAAGAAGCAGAGGCTGACAGAATTACGTCACTTCCAGGTCAGCCTAACGTCACGT	1	-	Chr3:373288-373407
Chr3:394990-395232	AJ_ArThaHiC20911103202934	GTGATCGATCAGAGGAAACTAATGCAGCCACAATCGAAGGAGAAATTCCTAGTAAAGAAAATGGTTCATCTTTACCGAGTATGCAACTTTCTTTCGATGGTGGTGGTAGGTTAGAAATAC	1	+	Chr3:395027-395146
Chr3:415621-415829	AJ_ArThaHiC20911103202991	GTGATAAAGTCTGTAGATTTGACTGATCTTTGAATTGAAAATTGAAAATACGATCACAATTCTCTAGGTCAACTTTAAGAAACACACTGTTTTGACTTAGATCTATATATTCATCTGCTT	5	+	Chr3:415670-415789
Chr3:420083-420272	AJ_ArThaHiC20911103203017	TTAGGTGGATCAAGAGGTGACAATCATCTATATGATCATGTGGCCATCGGAACTAAGGATATCTTGATGGGACGAAAGGTATATACAATTTACACAAATAACAGCTACGAGTACTTTATG	3	+	Chr3:420084-420203
Chr3:420320-420538	AJ_ArThaHiC20911103203027	GGGTTTGAGTATTCAGATCAAGTATCTAGTGATTTATCTAGACAAGAAGTATTTGTCGATATGATGGCTAGGGACTACCAAGGCCCAAAACCCAGAAGCAAGCCCCTCAAAAACAACTGA	1	+	Chr3:420357-420476
Chr3:420575-420793	AJ_ArThaHiC20911103203041	AAAGATTACATATGAAATGATGCAACGAATGTGAACAACATATATTTTGTAATTCTAAAGTGGCATGCATTCACACCAACAAGGCCACAAGGATTGAATCGGAGGACCCGCCCTCGTGTC	1	+	Chr3:420660-420779
Chr3:605417-605608	AJ_ArThaHiC20911103203532	AAACCGGGAAAATTCTATCGTAATTTTTCTGACCAGAACTAAACCGAGAAAAATCCATAACCGAACCAAATCTTACCTAAGAATCATCATTCATCACCCACGTATCGGATAAAAACTCAC	3	+	Chr3:605454-605573
Chr3:666366-666561	AJ_ArThaHiC20911103203659	GATTGAGAAATTGCTTACGAATCAATGAAATAACAGTTAAGATTTTGATGATGAATGCTCATGAAAATCTATTTAAGTTTGATTGAGAAATTGAAGAAGAGAATAAGAAATCGAGAGATT	5	-	Chr3:666406-666525
Chr3:666561-666802	AJ_ArThaHiC20911103203672	GACAAGGGAGGACGAAGATGAATTGTCTCAATTTTTAGGGTTCATCAAAATTTGAACAAAAGGGACCTGTTTTGCTCAATTTTTGATAGCAGAAGACGAATCTGGATCTGGGGTCACTTC	1	-	Chr3:666587-666706
Chr3:667468-667702	AJ_ArThaHiC20911103203725	CAAGATCAGAAGGAGCCACAGCAAAAGAAAGAAGTAAGTTATTTCCAATTATTTCGTGTTAGAACTTAGATATATACTCTCATTTATATCATACCTTGTCTAATTAATCTGAGAATAACA	5	-	Chr3:667559-667678
Chr3:667702-667875	AJ_ArThaHiC20911103203739	GGGGTTGAGCATATTAAGACAGAGATAGGAGACAATAAAGTTGTTGTGTCTGGAAAATTTGATGATCCGTTGAAGATATTACGAAGAGTGCAAAAGAAATTTAGTAGAAATGCTGAGATG	3	-	Chr3:667702-667821
Chr3:671524-671720	AJ_ArThaHiC20911103203884	TTGGTTTTGTTACTGCCAAATTTGTGCTTGCCAAAGATAGCGAGGTTAGTTTTCATTCTATGAATTCGTCTTTTTGTAATTCGAACAATAATGATCTTTCAGGTCCTGTAATCACCTTGA	3	-	Chr3:671565-671684
Chr3:671921-672106	AJ_ArThaHiC20911103203892	CCAGTGATCTGGCACTTCACAATGGGAAGTGGCTTTTCTGGTTCTTCGGATACCAAACAATGTCGCGATTTCCTCGAAGATTCATAGATGATTCATCAATGGAAGATGCAGGAATCTCTC	1	-	Chr3:671951-672070
Chr3:672112-672265	AJ_ArThaHiC20911103203897	GAGAAAAAGCCCCAAGAGACAGAGGAGAGGGCAAAGCAAGCAAGCACCTTTTTCTTTCCCATGCTCGAAACTCGGTTCTTGATTGATTCCTTCGCCGAAGATTAACCAATCAAATCCAAA	1	-	Chr3:672134-672253
Chr3:825511-825730	AJ_ArThaHiC20911103203949	ATGGTCTCTCGAGATTCTCGTGGATCTGTTCGAGACAGAGCAGAGAGAGAAAGGACATATCTCCGACGCTTTAGATCATTTACGTCACGCTATGTTTTATTTGTTGGCTCTGATGTGTTT	1	-	Chr3:825563-825682
Chr3:825861-826088	AJ_ArThaHiC20911103203959	ACCACCTCGTTTTCCGGTCATCGGAAACATCATCTGGCTTAAGAAAAACAACTTCTCCGATTTCCAAGGCGTTCTCCGTGACTTAGCCTCCCGTCACGGACCAATCATAACACTCCACGT	1	-	Chr3:825921-826040
Chr3:826088-826336	AJ_ArThaHiC20911103203975	CTAATCATATCTAAGTTATAACTTTTCTTTATAAACAATAAACAATAGCTTTGATTTGAAGCAAGAGGAGCAACAATGGAGATCACCACTATCATATTCCTCATCATATCCTCTCTCACC	4	-	Chr3:826097-826216
Chr3:844498-844672	AJ_ArThaHiC20911103204183	GTCACGAAATCTGATCCCAAATCCAACACGGTTTCGTCATCCGACACAAACTCTCTTCGTGTAGTCTTCGGGGATCAGTCTCAGTACGTTAACCCGGATCCAGGTCACTCCATTCAGGAT	1	-	Chr3:844517-844636
Chr3:886027-886268	AJ_ArThaHiC20911103204510	TCACAAGCGAGATAGATAGAGCAAAGAGCGTGTTGTGTTGTTTCTTCTCTCTTCGGCGTTTTCATCGTTTCTCATCTACCTCGAAATTTTCTCGTCACTCTAATCAAAAATCTCACTTCG	1	-	Chr3:886137-886256
Chr3:886312-886485	AJ_ArThaHiC20911103204523	TTTTTCTTGATATTGTTTTTACGCTAAATCAAAACTATATGAATAAGTAATATTGATTACCTTTTCCTTAATTTTTTTTATGCTAATAAAAATCAGACTTTTTTTGGTTAATGATAGAAA	6	-	Chr3:886342-886461
Chr3:902576-902738	AJ_ArThaHiC20911103204546	TTTGATATATGTATGTGTAATTTTTCTGAAAACAACAAGTCGTTGACATTTCGTATAGGGCTGCGACGCTTCTCTCCTCATAGACCCAACGACGTCTCAACTATCGGAAAAAAACGCCGG	1	-	Chr3:902577-902696
Chr3:1006677-1006873	AJ_ArThaHiC20911103204642	TGCTTTAGCAGCAACCAACAGAAACTTCAAGCTTGCTTCTAGGCTTCTTGGTTTAGACTCAAAGCTCGAGAAAAGTCTTCTCATTCCCTTCAGAGAGATCAAGGTTCGATGTTTTCCTCT	1	+	Chr3:1006714-1006833
Chr3:1007551-1007798	AJ_ArThaHiC20911103204676	TGGGAGAGATGCTGCTACAGGAAGAGGAGTGTTGTTTGCAACAGAAGCTTTACTCAACGAACATGGAAAGACCATATCTGGACAGCGATTCGCCATCCAGGTAAAAGAAGTTACAATGTT	1	+	Chr3:1007612-1007731
Chr3:1050288-1050444	AJ_ArThaHiC20911103204821	AAGATCGATATCATCGCTCTTTCCTTTGTTCGTAAAGGATCTGATCTGGTCGAGGTCAGGAAGTTGCTTGGAGAGAACGCAAAGAGTATCATGCTCATGTCAAAGGTAAGAGTTAAAAAA	1	+	Chr3:1050301-1050420
Chr3:1111378-1111552	AJ_ArThaHiC20911103204945	GGAAGAAATGGGTCAAACAGTGATAGTCATTTTCTACAAAGTGGATCCATCTCTTGTAAAGAAGCTGACCGGTGATTTCGGGAAGGTATTCAGAAACACTTGTAAGGGTAAAGAAAGAGA	1	-	Chr3:1111433-1111552
Chr3:1111552-1111710	AJ_ArThaHiC20911103204951	ACACCATTTGTTGATAACAATATCAAGAGAGGAGAATCTATCGGTCCAGAACTCATTCGGGCGATTAGAGGGTCCAAGATCGCAATCATCTTGCTCTCCAAGAACTACGCTTCTTCAAGC	1	-	Chr3:1111591-1111710
Chr3:1173561-1173737	AJ_ArThaHiC20911103205165	CTTGATTGACGATAGTAGTGATGATGATGATGATTCTGATTTGCTATCTCCAACAACAGTAAGCAATGTTCACCTTTATAATCCTCTCTCTGTTTTCAGTTTTCAACTCACAAAGCTAAT	3	+	Chr3:1173574-1173693
Chr3:1219165-1219409	AJ_ArThaHiC20911103205229	TTATAATCCAACGCAGTGAGCCAAATCAAGATGGTGACGCCAACTACAATTAGAACCGTCGATCTCCGCTCCGACACGGTGACTAAACCAACAGAGTCAATGCGTTCAGCAATGGCAAAC	1	-	Chr3:1219278-1219397
Chr3:1219619-1219779	AJ_ArThaHiC20911103205243	GTATAGACTGAAAAACAAGGAAACTAGTACAGTATAAGTTAAGAAATTAGGCAAAAACGTTAAGAAAACCTTACTTTACCAATTTGTCATAATGCATCCAACACTTATTTGGTTGGACCG	4	-	Chr3:1219624-1219743
Chr3:1219825-1220052	AJ_ArThaHiC20911103205246	ATTAGGCCACGCAAACGTTCATTATTAACCAGATTAGAATATACTAGAACAACGGTCTAATATATAATTTACACTATGTAACTTTTCTATATATATAAAAAATTCATAGAGAATAATGTT	6	-	Chr3:1219921-1220040
Chr3:1226506-1226671	AJ_ArThaHiC20911103205630	GGTTGAACACAGAGCTATACGGGGACAAGGAAGCAGAGAAGGAGAAGGAGAAGAAGAAGAAGGAAGAGGAAGTCAAAGCTATTCGGATTCCAGTGGTGAGGCTTAAGTTTGGAGAAGTAG	1	+	Chr3:1226531-1226650
Chr3:1306752-1306965	AJ_ArThaHiC20911103205742	ATAGACACGTGTATCTTAATAATTGTGCCTTAATTTTCTGAGGATCCAAACACAGAAAGTGTTAATTAAAGAGCTTAAAATTCACATAAGACTGACTAGTAAACACAACTACAGTTTAAA	5	-	Chr3:1306810-1306929
Chr3:1437642-1437850	AJ_ArThaHiC20911103205858	AGCAGAATTAACGAACTTTCCCTGAATTTTCACCGATTTTCTCTTAATTTCCCGCAAAATTTACATAAGAACGACATGTTTAGTCTGTTCTTTTCTTTTGAATCTCCCGAGGCAGGTACA	3	-	Chr3:1437683-1437802
Chr3:1440079-1440285	AJ_ArThaHiC20911103205949	CTCAGAAGAAGCATCATGGATGGTTTATCTAAGCACGATCATTGCCGTTTGCGGTTCCTACGAGTTTGGAACATGCGTAAGATTCTTTTACGACACCTATTACTTTGGAAATAAAAGATG	1	+	Chr3:1440092-1440211
Chr3:1440658-1440881	AJ_ArThaHiC20911103205977	TTCAGTGATCTCTGCCATCGGCTGGCTGATAATTTACTTGGCCAAGGTTATTCTTTTGGCTGAATTTCTTCAATAGCTGTTTTCAAAAAAAGCTTTAAAATAACATGGAAAATCTGCAAC	3	+	Chr3:1440671-1440790
Chr3:1514429-1514670	AJ_ArThaHiC20911103206216	CAAATGTCTTGTTCTTGTTGGTATTGCTCTGTTCTACAGAGCTCTGTTACTCTCTTACTCTCCCAGAAACGCTCTGAGCAATAGCTTATTGTTTCGAGATCGTCACATGTCAGATTCCTC	1	-	Chr3:1514515-1514634
Chr3:1578567-1578748	AJ_ArThaHiC20911103206476	TTCTGGTATAATGCCCGTACCAAACTTAAACAAAGCGTACCAAGACAATCACCTAACATATATAATCGGCATGTAATCATTATAGTATCCCATATTTTAATTTTAACTATCTTAACTAAC	4	+	Chr3:1578568-1578687
Chr3:1632475-1632716	AJ_ArThaHiC20911103206936	TCGAGATGCTTTTTGTTAAAGGGTGATGTTGCTGGATCGGTGGCAGAGTTCGATAGAGCAATCATTTTGGATCCCAGGCAAAAGGCATGTACGTTTTATCTCATAACACGATCTCTCTAT	1	+	Chr3:1632536-1632655
Chr3:1635055-1635244	AJ_ArThaHiC20911103206965	CATGCAATCGTGAACGGCGAGTTTCGACGACGGTTTGGGGAGTTAATCGATGTCGACGGATAAATTACTACTTCCTAACGGCGTTAAGTCAGACGGAGTCATCAGAATGACCAGAGCTGA	1	+	Chr3:1635068-1635187
Chr3:1635244-1635463	AJ_ArThaHiC20911103206972	GCGATCGTCTCGGTCTCGAGACCTGACACCACCGATTTTAGTCCCTTGCTTCTTTCTTACACCTTGGAGCTTCAGTATAAACAGGTATATATATAGTTTACAATGTCTGACTTGTAGTTT	1	+	Chr3:1635257-1635376
Chr3:1635886-1636048	AJ_ArThaHiC20911103207011	GGTGCTTTTAAATGCCATAAAACTTTTCGGTTTTGTGGATTCAAAGTAAAAATTGTTTCGTTTAAATTTCTGAAACAGTAGCTATTTATGTTATGCAGGAATGTTCCTTCCCGTGCAGCG	3	+	Chr3:1635923-1636042
Chr3:1636048-1636291	AJ_ArThaHiC20911103207017	AGAACCGCAATGCAAGGCTACTTGAGTCTCTTTCTAGGGAACTTGGACATTGTAAACTCCAAAGAGGTTTGAGATTTTTCACTGGCGATGACTAAGACTTTTCTAGTTGTGGTTTTTAGA	1	+	Chr3:1636097-1636216
Chr3:1749530-1749719	AJ_ArThaHiC20911103207127	CCTGATCTGATTCTATGTAAATTGTCTTCTCTTTTTCTATGTCCTTGTGATAATTCATTGATTGTGTCTTAAATGTAGTTAATAATCAATCTTTCTCCACAATTATCATTCTTATTGCCC	5	+	Chr3:1749555-1749674
Chr3:1933236-1933457	AJ_ArThaHiC20911103207818	AATCACGCTTCGTGTTTTTTTACATATATATAGGAAATATACTCTTAAAGCTGAGATTTGGAAATGGTGATCGGATTAAGCACAATGCTGGAAAAAACAGAGGCTCTTTTCGCTTCTGAT	3	-	Chr3:1933254-1933373
Chr3:1970341-1970539	AJ_ArThaHiC20911103208025	AAAACCCCGGCAACAATGGCCAAAAAATCTAAGCGAAACCAAAATAATAAAGGAAAGACGAAGATTCCCCAGAGAGTTGAAGTGTTTGGTGTGAATGATCCAGTAACCAGATTTGGTTGG	1	-	Chr3:1970396-1970515
Chr3:2066373-2066528	AJ_ArThaHiC20911103208076	AGATTCTAATTAGGGAGTAAGATGTGATGTCATTGATTTGCATTCTAGTTTTGCATTTTTTCAATTTGTTATTCCTTCAGATTCCAATTCGATTACTTAATTGTTTCAGGAATGCTATGG	4	-	Chr3:2066397-2066516
Chr3:2066528-2066777	AJ_ArThaHiC20911103208089	GGGGACCATCTGCTGGGAAATTCACTGATAAACAGTATTTGAATATTTTGCAGTCGATGGCACAAGCTGTTCATGCCTTCGATCTTAATATGCGGATTATCTTTTGGTTAGTAGTTCCAT	1	-	Chr3:2066538-2066657
Chr3:2066777-2067019	AJ_ArThaHiC20911103208093	GATTCTACTCGATCGGAGGAGTAGTTGTTGTTGTGGTAGGGTTTACCCATTTTGGAGCGCAATGGAGAATCCACCTGCGGAGGAGCTGCTGAAGAAGATACTTGAGCTAGAGGAGAGTCA	1	-	Chr3:2066876-2066995
Chr3:2067019-2067185	AJ_ArThaHiC20911103208105	GCTTGAGAAAAAAAGGTTAAACGTTTCTCTCGCGTCATTTCAATTCCATTTTCTCTACTTTTGTTCTTCTGTTAGGGAGCGAGAGATTAGATAGTCAAAATCAAATCGACATGGATTAAG	3	-	Chr3:2067042-2067161
Chr3:2073074-2073273	AJ_ArThaHiC20911103208172	ATGATTGTTCTCAGGAATGCCATGTCGGAAAAGCTTTATGGGTACTCTGCTGCAGAAGTAGTTGGGCGGAACCCAGTACATGTTATTGTAGATGATCAGAATGCTGCCTTTGCCTTGAAT	1	-	Chr3:2073142-2073261
Chr3:2073368-2073547	AJ_ArThaHiC20911103208183	CGGAGCTTAGGCAGCCGTCGCATCCGGTGTTGCCGCGTCGGCCGTTGAGACGTATCCAGGGATCGATGAATTCGAATCCATCGCCCGGGAAGTTCACTGATAAACAGTATTTGAATATTT	1	-	Chr3:2073380-2073499
Chr3:2077552-2077724	AJ_ArThaHiC20911103208216	CCCTATTGACGTTATGGTAGATGATCGGGATGCTCCCTTTGCCATGACTATTGCTCAACTTTGTTCCAATGGAGAGAGCTGGACTGGCAAGTTTCCTGTCAAGCGCAGAACAGGAGAGAA	1	-	Chr3:2077581-2077700
Chr3:2077724-2077879	AJ_ArThaHiC20911103208221	CAATATGCGAATTATCTTTTGGTGAGTGAGTTCTTTGGCCTTCCTATACTGTTCACGTCTTAGCTGGTCCTCAAGAGAGTGATTTCATGGATACTTTTGCATGGTTCCAGGAATGCTATG	1	-	Chr3:2077748-2077867
Chr3:2077879-2078073	AJ_ArThaHiC20911103208228	TGCAGGAGATGTCTCGGCTCAAGGTCTCCACGGAGCTTCGGAAGGAGAGCCGTATCCAGTGTTCCATGAATCTGAGACCATCGCCCTGGAAGTTCACTCATAAACAGTATCTCAATATTT	1	-	Chr3:2077906-2078025
Chr3:2133393-2133592	AJ_ArThaHiC20911103208465	CTCTGTTTCCTCTTAAACGTGGACTTAAAAATGTGTTCTTTGTTTTTTCCAGGTCTGTCCTGTATGCACTAAGAGGGTGGGATTGGATATCGTTGGCCATATTACGACGCAACATGCGAA	1	+	Chr3:2133430-2133549
Chr3:2143869-2144095	AJ_ArThaHiC20911103208753	ATTTGTGTATGAAGTGATTTGCTGGATCGCGTTGTCTAATTGTGTGCACTTTGCGTTCAAGAGGATAGTGAGGATCGTGACCGACGGTGAAAGGGAGAAGTTGAACATTGCATTATCTCC	1	+	Chr3:2143906-2144025
Chr3:2206468-2206689	AJ_ArThaHiC20911103208931	AGCGTACTATTTATCAACCAAAGAGCCACGAGCATACATTCACCCTCATGCCGAGAAAGATCACATTCACTTGTAACGCATGTGGGATGCTTGGTGATTGCAATCCTTACTTTTGTTTTG	1	+	Chr3:2206553-2206672
Chr3:2206923-2207149	AJ_ArThaHiC20911103208937	AATAAATGATAAAGAAATCATTCATTTTAGTCATGAAGAACATAGTCTAAGACTTGGCGGTGATGATAATGTTACCGGTTATGAAAAGATGTTGTGCGACGCTTGCATCACTCCCATCAG	3	+	Chr3:2206960-2207079
Chr3:2210035-2210261	AJ_ArThaHiC20911103208979	GTAAATGATAAGGAAATCATTCATTTTTGTCATGAAGAACATAATCTAAGACTTGGTGGTGATGATGATGTTACCGGTTATGAAAAGATGCTGTGCGACGCTTGCATCACTCCCATCAGT	3	+	Chr3:2210072-2210191
Chr3:2257506-2257732	AJ_ArThaHiC20911103209009	ACCGATCCCCGCGTCCGCCGGCGTGTCATTGGTTTTGAGCCGGAGCAAATCTCTCTCTCCCTCTCCTCCGATCATGATTCCATCTGGGTCTCTTGGATCACAGGTTCATTTTACTACCTT	1	-	Chr3:2257508-2257627
Chr3:2347883-2348049	AJ_ArThaHiC20911103209188	TTAGAGAACTCGGCCACAATGCGGCCATCTGCAAAACTAAATGGAAATCCTCCGGCGGACTCACCGCCGGTAACCATGAGTTCATCGACGTCGTGTATACACCTTCCGCCTCGTCTCAGT	1	+	Chr3:2347896-2348015
Chr3:2575027-2575203	AJ_ArThaHiC20911103209654	AAGAACAACAAACCCACATCATGACTTGTGTTATTATAGTTTTCTCCACCATGAAATAATTAATTTAACGCTAGCTATATAGTAGTGCTTAATTTACTCCACATCAATAAATCATTTCAG	5	-	Chr3:2575060-2575179
Chr3:2577349-2577508	AJ_ArThaHiC20911103209750	TACATTTTATCGTCAGGTGGTCTCAAATAGCTACTCGGCTTCCAGGTAGAACAGACAACGAGATCAAAAACTTTTGGAACTCGACATTGAAGAAGCGGCTTAAGAACAACAGCAACAACA	1	-	Chr3:2577365-2577484
Chr3:2577623-2577789	AJ_ArThaHiC20911103209755	TGGTCGCCTGATGAAGATGAGAAGCTGATAAGATACATGTTGACTAATGGACAAGGATGTTGGAGTGACATCGCTAGAAATGCTGGTCTTTTACGTTGTGGTAAAAGTTGTCGCCTTCGC	1	-	Chr3:2577646-2577765
Chr3:2577844-2578039	AJ_ArThaHiC20911103209764	CCCACAAATCATATCATCCTCTCCATCTTTCCTTGCTTCTTACAATCTCTCCAATTTCAAATCTGTATACTCTTCTTCAAAAAGGCTCCACCAGTCCAAAATGATGATGAGGAAACCGGA	1	-	Chr3:2577848-2577967
Chr3:2581318-2581526	AJ_ArThaHiC20911103209821	AATCTTCCTCTTAGCTCAGATTCTGAGTCTTTAGATCGCTCTATATCCACCACCCCCTCTAGGCATTTGCAACAACAAGGCGATAATAATGACGGTGACAAATCCTCTAACGTTTACTGT	1	-	Chr3:2581347-2581466
Chr3:2641531-2641753	AJ_ArThaHiC20911103209920	GGTTTTGAGTTTATGTCAAAGTGTCTCCTTTTGTAGCTCCTGCTAATATGTCTTTATTGATGTAATTTTGTTGTCACGTTGTTTTAGGTCCGGTGGCTGAGGACATGTTCCATTGGCAAG	1	+	Chr3:2641633-2641752
Chr3:2703007-2703201	AJ_ArThaHiC20911103210083	GAATGGTTTTGATATTATATCTCAAAGTTCTGAGCAGTTCAAAGCTCTCAATTTTGCTTGCCATGAGGATTTCAATCAGATACAAGGCTCTATTGAAGGTCAGTTTTGTTTTTCCGATTT	3	+	Chr3:2703044-2703163
Chr3:2806228-2806442	AJ_ArThaHiC20911103210215	TTTTCTCTCCATGTGGAGAGATCACGGATGTTCATATTCCCGAAACTCGCAATTCTTCTCTCTGGAGTCATGCTTTTATTTATTTTGTGGGAGAAGGCACAGCAGACAAGGCCTTGCAAC	1	-	Chr3:2806287-2806406
Chr3:2833612-2833849	AJ_ArThaHiC20911103210565	ATTCATCTGTGTTGAATTGAGGAATCTAGGGTTCTTATGCTGTCTTTCGGAGTGTGGCTGTTGAGCAACCTTGTGTTTTTTTGTGAAATGGATGTGAAATGTGAACTTGGCTGAGAGATT	1	+	Chr3:2833673-2833792
Chr3:2833849-2834077	AJ_ArThaHiC20911103210574	GAATCCCAAAAGAACAACAAAGTTAGGTTGGATACCATTTGACTACCTCTAGTTGTATTGTTATAGCTGATCGAAACACAGTTTTATTTAGGGGGACATTAGTAGATTATTGTGTTCTTG	3	+	Chr3:2833886-2834005
Chr3:2856237-2856452	AJ_ArThaHiC20911103210924	AACAGAAATTAGAGTTTTGGGTTCAAGAAAGCAAGCTTGATACTAATGATCATGGAAAGGTCACGGAGGCTAGCATAGATGGTTCGAGTTCGAGTCATCATCGTGATATTGAAGTATTGG	1	+	Chr3:2856286-2856405
Chr3:2857883-2858051	AJ_ArThaHiC20911103210956	CTCTCTTGCTTCGTCGATCTCCAATTTGGGATCTGCTATGACCAAATCAGTTAATGGGTGAGGTTTTTGAGATCCCTTTTCTTAAACCCGGATCTGCCACTCAGCTCGATTCGTCATTTT	1	+	Chr3:2857920-2858039
Chr3:2858772-2858960	AJ_ArThaHiC20911103210979	TCGTGGGCTATATCCGTGTATTATGCTTTCCAACGTACCTGGAAACCATTCAATCCAATCCTTGGTGAGACTTATGAGATGGCTAATTACAATGGTGTTAACTTCATATCTGAACAGGTC	1	+	Chr3:2858809-2858928
Chr3:2864056-2864266	AJ_ArThaHiC20911103211034	GTGTCAGCAAAATTTTGAAAACAATAATAGAGGACCTTAATGATAAAATTAAAACAAAAGGGGCAAATACGAAATAATATAATAAAGAAGGGGTCATTTCAATTAGGTGGGGAGCTTCGA	4	-	Chr3:2864075-2864194
Chr3:2889598-2889753	AJ_ArThaHiC20911103211174	TGATGGGTTTTTTCTTTCGATTGTTGCAGTTGCAAAATGTACCCTGACTTGGGATTCTCCGGCGAGACAACCACAACTGAGACTTTTGTCTTGGGCGTTGCACCGGCGATGAAGAATCAG	1	-	Chr3:2889622-2889741
Chr3:2889770-2889964	AJ_ArThaHiC20911103211179	GTGCGGCAACGGTTGTGGAGGGTAAGTCTCCAACGTCTCGTTTGTATTTATATTTTCCGGTGAAATCGTTGCATGCAAGTATGCAACAACTGTGAATCGATGATGATATCTTGTTTTGAT	1	-	Chr3:2889821-2889940
Chr3:2889964-2890153	AJ_ArThaHiC20911103211185	GCTGAGGGTAAAGACGTAAATGAAGAACTAGTTTTGGAGATAAGAGCGGAGAAAGATTGCGACACATGTATGGTCAATATTAATCTCATTTAGCTTATAAATTTGGGAGCTTCCTCTATC	3	-	Chr3:2890034-2890153
Chr3:2890530-2890686	AJ_ArThaHiC20911103211216	TTGACTAAACAAACAAAATCGGTTTAGCAAAAGAAAAAGTTACTTTTCTGATGAACTAGGATAAGGAATTCGGAACTGAATTTTGCTACGTTCTCTCTGGACCACACACACTGAACACCC	3	-	Chr3:2890531-2890650
Chr3:2897053-2897218	AJ_ArThaHiC20911103211286	CTACTGCTCACTTCCTTTGCTTCTGTTCTTCAATGGTGATTCGCTCTCTGCTACAATGCAGAACATGGTCTAAGAGTGACTGGCTTCTCGCTTCAATCGGAATAGTCTTGATCGTTTATT	1	-	Chr3:2897075-2897194
Chr3:2897285-2897500	AJ_ArThaHiC20911103211297	TTATTATTAAGATCCTCGGTTTCCTTGGGGCATAAGTTAGATCTTTGGTCTATAAGATACAACTAGCTAGATCCTCGGTTTTCTTTGGTCTATAAGATACAACTAGATCTTTGGTCAATA	3	-	Chr3:2897285-2897404
Chr3:3019373-3019533	AJ_ArThaHiC20911103211636	TGGGGATTAGGGTTTTGGTTGATCTTGTGTTTCTATAGTTGAATCTTAATCTTCTTTGTTGTTGTTACAGGAAATCGAAGAAAGATTTCAGTACTGCTATTCTCGAGAGGAAGAAGTCTC	3	+	Chr3:3019398-3019517
Chr3:3020208-3020373	AJ_ArThaHiC20911103211667	AGATTGAATTCTTTTCAACAGCTTATTTCCTTGAGGCATACCGTCCAGTGAGGAAGGGTGATCTCTTCCTAGTCAGAGGAGGAATGAGGAGTGTGGAGTTCAAAGTTATAGAGACAGATC	1	+	Chr3:3020254-3020373
Chr3:3059994-3060172	AJ_ArThaHiC20911103211868	TTTCATCTCCTTCATTTATCTTGTTTATATTTCTTAAGAGTAACGGAGATTGTAGAGATACAACATTGGAAGAGATGACAAAAACCGGGATATCAATCTACCGGATATATATGTCACAAA	4	-	Chr3:3060029-3060148
Chr3:3061830-3062015	AJ_ArThaHiC20911103211996	ATCTTCAATCCGATATCCAAAACTCAGATTTCAGCTCAGCTCTCGTCATCTTCCTCGGCGACTACTGCGATCGTGGACCGGAGACTCGAAAAGTCATCGACTTCTTGATCTCTTTGCCGG	1	+	Chr3:3061867-3061986
Chr3:3062202-3062446	AJ_ArThaHiC20911103212004	ACGATGCGGCGTCTACTTTTGAATCTTATGGCGTTCCTCATGGATCTTCTGGTGACATTCTCCATTGATTCTTCTTTCTGGTTATAGTTTATGATTAGACGTTTGTCTTTGTCGGAAACT	1	+	Chr3:3062251-3062370
Chr3:3076673-3076879	AJ_ArThaHiC20911103212227	ACCATCTTCTCAATTCTCCTCTGATCTCTTCGGCTTCAACCTCGTTTCAGCGCCGGACCAGCACCATCGTCTTCATTTCACCGACCATGAGATAAGTTTATTGCCACGTGGAATACAAGG	1	+	Chr3:3076710-3076829
Chr3:3155399-3155575	AJ_ArThaHiC20911103212314	AGATCAACGTTATGCTTAAAGAGGTGGACTGCGACGGCGACGGTACGATCCGTCTTGAAGAGCTTGCGAGTCGTGTAGTCTCTTTAGATCCGGCTCGTGACTCGACTGAGCTGAAGGAGA	1	+	Chr3:3155424-3155543
Chr3:3186712-3186930	AJ_ArThaHiC20911103212459	TCGGGACAATAGTGGATTCATCGATGATAAGGAGCTTCAAGGAGCTCTATCTTCGTATAATCAGAGCTTCAGCATAAGAACTGTTCATCTCCTTATGTATCTATTCACCAACAGCAATGT	1	+	Chr3:3186761-3186880
Chr3:3186963-3187121	AJ_ArThaHiC20911103212465	AACTAGAAGATTGTCTTGCTTCAACAATCTAGGTTTGAGTTTTTGGAATTATCTTGTTGAATTTTCCTCTGCATATTGTTTGGTTTGACTTTGATGATCGTTGGTGCCAAATCCTCAAGT	3	+	Chr3:3186964-3187083
Chr3:3214531-3214690	AJ_ArThaHiC20911103212472	AGTATAACCACTAGCAATGGCGTTGAGCTTTTATCTGATGATGAGTTACGTTGGCACCCTGAGTATCTCTCTTATTACTATTCGAATGAGCATTCGAATCCGAGGTTGCCTCCTCCGTTG	1	-	Chr3:3214547-3214666
Chr3:3214690-3214894	AJ_ArThaHiC20911103212479	TCGAATCTTTGCTCCAACAACATCGTAATCAGCAATCATTTGGCCGAGAACGAGAACGAGACATTGATGTTCACAGAAGCGGAAGCGCGCCTCCTACCGTGGAAGGATTGTTGAGAGCTA	1	-	Chr3:3214727-3214846
Chr3:3214894-3215065	AJ_ArThaHiC20911103212485	CTCCGATTTCGTAACACCGACACGAATTTGTTTTTGGCTTTTTCTGGTTTTTGCAGGTGTTGATTTGATTAGGTTTAATATTGATTCGGATGAAGGGAAGAGATGGTTACTAATAGCTAC	3	-	Chr3:3214922-3215041
Chr3:3215112-3215277	AJ_ArThaHiC20911103212491	TTCCCTTTCTCTCAATCTTCCTCACTTACATTTCTTATCTCACTCCCTCTCTCACTTTCTCCTTCAATGTTCTCTCCTCTGCGTTTTCACGAAACAGAGAACCTTATCGTTCCGTCTTCG	1	-	Chr3:3215134-3215253
Chr3:3215288-3215524	AJ_ArThaHiC20911103212501	GGATATACGATGTCGTAATAGCCGCATCTTCTTCTAATCACCTTTTTTAAGATTAGTTTATGTAATTAAAAAAGGTTAAGTGTGACAGTTTGGGAGAATTACCAGAGGATGAAGGCGATC	3	-	Chr3:3215321-3215440
Chr3:3350275-3350426	AJ_ArThaHiC20911103212622	TGCAGATTGCCGCGAGTGTTTGTTTTTTGTGTTTGGATGTTTTCGAAATTTGGCTTTGGTGTTAATCCTACGAGATCGTTCATTTATGTCTCCAGTTAAATTCCATAAAGGAGGCAGTGG	1	-	Chr3:3350307-3350426
Chr3:3350674-3350888	AJ_ArThaHiC20911103212630	ACCAAACACTAACCAAAAGGATAGAATTAGACGTGTTACCAAGCAGCACCTTATTTGGTCATCTTCCTCATTCGAAGGTTACTCGCACTTCCTCTGCACACTTCTTCCTCTCCATCTAAC	1	-	Chr3:3350721-3350840
Chr3:3352550-3352786	AJ_ArThaHiC20911103212706	AAAGTCATCTCAAGAACTCAACGGAGTTGACGAGTAACGCACTAGCGATCATCACATGGCTCGGGAAGATCGCTGACTCTTTCAAACTCCGGAGGCGTTTGTTAACAACTGCAGACGTGG	1	+	Chr3:3352667-3352786
Chr3:3394878-3395042	AJ_ArThaHiC20911103212959	TTTTTTTGTATACATGTAGAGATCACTAGCGTTTTCCATTTTTCTAGGTACCAAGACTTCCTTCCACGACAAGAAGATGAGACACCTCCCGCCGATTTTGCTGAGGTACCACCCTACTGC	1	+	Chr3:3394879-3394998
Chr3:3412819-3413057	AJ_ArThaHiC20911103213276	AAAGTTAGGGTTTTACCTAAATGTAACCATGGCTTCCACGTGAGGTGCATCGATACTTGGTTGCTCTCACGTTCCTCTTGCCCCACTTGTAGACAATCGCTACTCCTTGAGCAGCCTTCG	1	-	Chr3:3412914-3413033
Chr3:3413057-3413265	AJ_ArThaHiC20911103213287	GTGCTACGCATAACTCGGAGATTCACTTCGGATGATCAAGTCTCAAACGCTTCAAACGCAAACGCAAATTTGGGACGTTTAGCGGCTGCCACGGGTCTCAAGAAACAGGCGTTGAAACAA	1	-	Chr3:3413122-3413241
Chr3:3426731-3426900	AJ_ArThaHiC20911103213402	GTGAATACATGGGATAAAATTACCGACAACAAAAAATTAAAAACAAATTCATGGATGATTATAAGAATTGTGGAACGAATTTTCAATTGTCAGAGATTATATTAGAAAACTGTAACAAAT	6	-	Chr3:3426757-3426876
Chr3:3445392-3445566	AJ_ArThaHiC20911103213573	ATTAGAAATCTTGTATCAGACAGACTTGTTCATTATTTTGTTGGATAAAAATGGTGAGTGTTGTGGGAGAGATGTTTTGTAATCCGTACACGACGGAGCTGGTGGTGAGAAGGCGGCGTG	1	-	Chr3:3445399-3445518
Chr3:3445566-3445727	AJ_ArThaHiC20911103213578	AAAAAAACTTCTTTAATAAGAGTAAAATAGTAAATGAATAATATTTCCTTCTGCTTCAAGCAATCTAAGAACCGCGTTAATTAACTTTAAGTAATAAGCTCTACTTTTCTTCTCTTTATT	6	-	Chr3:3445572-3445691
Chr3:3480221-3480383	AJ_ArThaHiC20911103213695	AGCTAATGAGACAGCTAGAGTGATAGTGATTAAGATATGAATTTGTTTTTTTTTTTTGTAATTGTGTGGGTAAAGATTTATACATATACTTGTGTATTGCATGGACATGGATGGAGGATG	4	+	Chr3:3480246-3480365
Chr3:3481293-3481543	AJ_ArThaHiC20911103213761	AGTGAATATGCTTGTAGTTGTCTTATTTGATTCCTGGAATAGAGTCTAGTTGGCCCCTTACGGTACCAATGCAGTCCAGTAGTTAGCTTTGCTTTACGTCCGATAGTGGATCTGGTATGA	1	+	Chr3:3481354-3481473
Chr3:3504355-3504535	AJ_ArThaHiC20911103213810	CTCTGGCAATGAAGACGACAAGAAGAGGATATCCGAGGCATGCCGTGAATGGGGATTCTTCCAGGTAAGAATGGCACTGGAAGATAAAAATAGTCACGTTTAATTATTTTTAGACATGCA	1	+	Chr3:3504356-3504475
Chr3:3510187-3510370	AJ_ArThaHiC20911103213929	TCTCTCTCTCTTCATGCCCGAACGCATCGGGTCTCAAAAACCATTGATACAGACATCGATCCTTGTCAACTAGTACTGATCTATAAATCTTATAAAAATCTGTAGAGATATGGCCGCCGC	1	-	Chr3:3510203-3510322
Chr3:3515705-3515860	AJ_ArThaHiC20911103213997	TTTGGGATTTTCTAGATTTTGAACCTGGAGCTGAGTTCCGTGTGTGATTACTTAATTCGGTTATGGCTGCACCAAACGTTCGTAGTAGTAGCAGCTTCTCTCGCAACATATCAGTTGTGT	1	-	Chr3:3515729-3515848
Chr3:3521349-3521529	AJ_ArThaHiC20911103214064	TCAGTGGTTCTCATGGGTAAGAACACTATGATGAAACGTTCCGTTAGAATCCACTCCGAGAACTCTGGAAACACTGCAATTTTGAATCTGCTTCCCCTCCTTCAGGTTAATCTCAGCTTC	1	+	Chr3:3521398-3521517
Chr3:3537587-3537757	AJ_ArThaHiC20911103214165	ATTGAAACCTGTCAACACAATAAATAAAAAAGTTGCCAATAGAGATAACCGGATATAACCGGTATAAAATGAGACGCCTAGTGATCTGAGAAAACAAGGCACCGTCTCGAGCGGCACAAA	1	-	Chr3:3537590-3537709
Chr3:3570592-3570798	AJ_ArThaHiC20911103214344	CCACAATTTCACCATGCCGGATCTGCTACCAACCAGTTGACATCAAGTACGGCCAATATTATTGCAACCGCGAGAATTGCTCTTATGTAGTTCATTCAAAATGTGCAACACATGAGAACA	1	+	Chr3:3570641-3570760
Chr3:3599705-3599950	AJ_ArThaHiC20911103214425	CTTTATCGCTTCATATATATAAAAGTCTACATCTATCTCTTTCTAGGTCACTAGCTAGACTCTAGATTAAGGATTGAAATTAGGGTTTCATGTTTCCAGCAAAATGGTGCCGTCTTGAGT	3	-	Chr3:3599759-3599878
Chr3:3890024-3890188	AJ_ArThaHiC20911103214446	TTTTTTAAAAAAAATTCGAGTAATAATGGAGACGCTTTATGTATGTGTTGTACGGACAAATGCAAGGTTTTGGGTTTTGTCTATAATGAATGAGTTTGGTTCTGTAAATTAGTTTCTATC	5	-	Chr3:3890045-3890164
Chr3:3962613-3962809	AJ_ArThaHiC20911103214592	CGTCGTTGGCAACAAGGTCAGGGTTGTTGAGTAAGTCAACTCCTATTGCTCTACCGCATAGACCGTAATTGTAGTTCCACGACAGTTGCATTGGTCCTCTTCCGTAGTAGCGTTTGCCAG	1	+	Chr3:3962614-3962733
Chr3:3973845-3974051	AJ_ArThaHiC20911103214767	GGGCGTAGGGGAACTTCATTTACTGTCCGTGTGTAGAATATCGGAAGAGATCGATCTGATCTTCCAGGAATCACACAAAATCTAACCAGGTAAACTCAACTTCATATCACTAATCAGGAA	1	-	Chr3:3973932-3974051
Chr3:4043933-4044107	AJ_ArThaHiC20911103215095	ACTAATTAGCAATGAGTGAATTAGCCTATGTTTTTTATATACTATATGCTCGATGTGGATTAATCCTAACAGTATCTATATGTGTGTATAGGGTTGCAGAGATGTGGGAAGAGTTGCAGA	3	-	Chr3:4043934-4044053
Chr3:4044599-4044844	AJ_ArThaHiC20911103215131	AAGTACAAGTTATACGTGAAGGGGTAGTAAAACCCAACGAGTCATTCTACTATTTTCTTACCAATGATCCGAAATATTTGTGAAGTCTAGTAGACAACAAGTAATGAGTGAAACAGAAAC	3	-	Chr3:4044689-4044808
Chr3:4141631-4141825	AJ_ArThaHiC20911103215864	AGACATTTTCTCAACCGGAGTTCTAAATCTACCGCTCAACAACCGTCTCATCCGCCGCCGGGAAAAGACTCAGATATCTTGGAGTCATCGTCAACGTCTATCTCCTCTTCACGTCTCTCT	1	-	Chr3:4141682-4141801
Chr3:4352224-4352461	AJ_ArThaHiC20911103215984	GAAAGGCGATGGATCCGATGCACCTCTCTTTACCTTGAAACCTGGAAAGACCTACAGGGTTAGGATCTGTAACGTGGGTCTCAAGACATCTCTTAACTTTAGGATTCAGAATCACAAGTT	1	-	Chr3:4352282-4352401
Chr3:4367627-4367799	AJ_ArThaHiC20911103216157	GGTTTTGTTGAAGAAATGGATAATAATGATGACCATCAGGCTGCTGATTCTCTCTGGACTCCTATCTTGATGGAGATGATGAACAACAATCACGACCAACATTCTACCAATCAGGAAGAC	1	+	Chr3:4367652-4367771
Chr3:4367799-4368029	AJ_ArThaHiC20911103216166	ATCAACTTGAAGAGATTAGGAGGATAAGGACTAGACATTCAACTGCTATTGTTAATCTGCTTCAGGGGATTCGAGCTGGATTATTGATCGAATCCGAGAACAACGAGGATAATCCCGATA	1	+	Chr3:4367860-4367979
Chr3:4375690-4375926	AJ_ArThaHiC20911103216263	AGACCTGCTCCTCACGGAGGCGGTCCACCGAAGATCATTTCTAAGTTATGACATGTAACGATCTTAATTAGCGATCCAATCTATATATAATCTATTAACTTGTGATTTCTGATTATTTGT	3	+	Chr3:4375691-4375810
Chr3:4377246-4377411	AJ_ArThaHiC20911103216433	CCGGAAAATAGCAAAGACCCAGAGCCAAACACACGTCGATCCGGACCGGTGGAGACCAAAAACGGCAGACCTAAAGACTGGTGGCTCAGTCAGACTCTCTAGATCCAAAACCCGCTGCAG	1	+	Chr3:4377259-4377378
Chr3:4500219-4500451	AJ_ArThaHiC20911103216509	TCGAGTTCGTCTCTTCTGCTTACTCAGACCGTCCTGAGAGTTTCATGGACAAGCGTCGTCTCATGTAACAACTCTTATCCCTCTTTCTATACGTGTTCCTTAATCTAAAACTAATAAATT	1	-	Chr3:4500320-4500439
Chr3:4517321-4517525	AJ_ArThaHiC20911103216591	AACCAACTGTGAAAGAAGAAGACATAATTCACAACCAAACCAGTACTAAAGAAATGTATGATGCAGAAAAACCAAGATGCCTTCTGTCTCATCCAGCTGACTCTCCTCACAACCTGTCCG	1	+	Chr3:4517358-4517477
Chr3:4517525-4517690	AJ_ArThaHiC20911103216598	TATCTCCACTTCCACTGCACCACCTGCGACGTAAAGTTCCACGAAGGTTGTCAAACGCGTCCGAGAAGGATAACACATCCTTATCACCTCCAACACCCTCTCACTCTCTTCTATCGAAAC	1	+	Chr3:4517550-4517669
Chr3:4517690-4517936	AJ_ArThaHiC20911103216606	TCTGGTGAAGGGAAGTCTGAACTTGTCGATATTATTCCGTCCAAATCCGATATCATTTTTGACAAGTGCACTTGGTGTGGAAAAGATTTCAAAGGTGATGTTTGGTTCTACCGTTGTTTG	1	+	Chr3:4517751-4517870
Chr3:4517936-4518092	AJ_ArThaHiC20911103216614	ACTCACTCCTCTTCTTACCTCGGCCTTTATTAGTTCCATGTGATGCTTGTGGGTTGGTCAACGCGTTGGAACCAAGTTATGCTTGTTTTCAATGTAATTACATGATCCATCAGAATTGCA	1	+	Chr3:4517949-4518068
Chr3:4518092-4518256	AJ_ArThaHiC20911103216618	ATCACCGTCTTTCTTTTACTCCTTTCGGGCCACCTCTGATTTCTTTATGCCGGGTTTGCTACAAAGAGGTTGATATCAAGTATGGGCAATATTCTTGCCAGCACGAAGATTGTTCTTATG	1	+	Chr3:4518105-4518224
Chr3:4544855-4545024	AJ_ArThaHiC20911103216778	TCATCATCAGCAACAGCAAGAACAACAACAACAACAGTTAGTTGTTCCAGATTCGCAGACTCAAAAGAAGAGGAGAAACCAACCAGGGAATCCAGGTTTGTGTGAAAAGAATACAAAAAC	1	+	Chr3:4544880-4544999
Chr3:4619558-4619788	AJ_ArThaHiC20911103217373	TTCTTCTTCTCGTCAACAACCGAAACCGATTCGAACATCATCCGTCGACCACTCCTCCGCCGTCCAGAAACCTAAAGAACTCGGTGGCTTCTTGAGAACGAAATCAAAAGCGTTAAAGAT	1	-	Chr3:4619585-4619704
Chr3:4619788-4620026	AJ_ArThaHiC20911103217384	CCCTCGAATCCATCAAGAAGAAGAAGCATCACCACCAACAACGTAACGCTTCTCTACACGAAGATCGTGAAATCTCTCCTATCTATCACCGCCGCTCAATCGCCGCTGATTTCGAGAGAT	1	-	Chr3:4619823-4619942
Chr3:4620081-4620253	AJ_ArThaHiC20911103217390	TAAAAAGATGATTGGTGGTTTAGTTTTGTGGGGGACGAGGCAGAGAGTTGTCGAGAAAGACACGTGGCAATGATTACCACTTGTCTGCCTTGTTATAAACAACACACTCTTTCTGTCTTC	1	-	Chr3:4620110-4620229
Chr3:4620253-4620486	AJ_ArThaHiC20911103217398	AACCTTACCATTTTCATACATATAGATCTTAGATCATTTTACTAAGCTTTGATTTTTGATCTTTCCGATATTCGTCTTGCATACCGTAATCCTATAAACATTTTAAACAACTTTTCTCCC	5	-	Chr3:4620319-4620438
Chr3:4746667-4746826	AJ_ArThaHiC20911103217628	TTAACTAAGAAGACACTAAACACATGCACTAACACACAGAACAAAACTTATGGGTTCATCATCATCGTCGTCAAGCACAAAGGTGGACACCGATATGTTGGTAGACGAAACCTACCTCTC	1	-	Chr3:4746683-4746802
Chr3:4768739-4768947	AJ_ArThaHiC20911103217871	TCACTCAGAAATGTATGCAGCGTAACTCGTTACCCTGCTTCTTGTGTCTCAAGCATCTCAAAGCTTCCATCGTCTAACACGACGGATCCGGAGGCTTTATTCAGGCTTTCGTTACAAGTT	1	-	Chr3:4768768-4768887
Chr3:4769003-4769169	AJ_ArThaHiC20911103217878	CGCTGTGACATACCACGGAACGTGTCTCGACGCGCTTGATGAAATCAGCCACACGAATTCAGCAATCCCACTGAAGCTTAAATCTGGCATGGTTAACTCGACCGAGTTCACAAGTAACAG	1	-	Chr3:4769014-4769133
Chr3:4769432-4769585	AJ_ArThaHiC20911103217881	TGGCGATTATCATCAGCTCCACCGTCACCATCGCAATTCACAGCCGGAAAGGCAATTCACCACATCCAACACCGAGTTCAGTCCCCGAGTTGACTCCCGCCGCTTCACTCAAAACTGTGT	1	-	Chr3:4769454-4769573
Chr3:4774756-4774913	AJ_ArThaHiC20911103217957	GTGTCGAACAATGGCACCATCAATGAAAGAAATTTTTTCTAAAGATAATTTCAAGAAAAACAAGAAACTTGTTTTGCTATCCGCCGCCGTAGCTTTGCTCTTCGTAGCCGCCGTCGCCGG	1	-	Chr3:4774782-4774901
Chr3:4798828-4799051	AJ_ArThaHiC20911103217989	CTGAAACTTATACGCCACCTCGGCACCGGAAACCTAGGCCGAGTGTTCCTCTGTAACCTCCGTGACTCTTCCGCAAGATTCGCTTTAAAGGTCATCGACCGTAACTGTCTCACGACGGAG	1	-	Chr3:4798884-4799003
Chr3:4799051-4799272	AJ_ArThaHiC20911103217997	TTCTATTTCCCTGACACCGATCTTGATCTCAGCTTCACATCCACCACTACCGACCGTACATTCGCCTCCTCGAGCGCTCGCACAAGTCTAACATTAAGCTTCAACGACAGACTCTCTACT	1	-	Chr3:4799129-4799248
Chr3:4799272-4799425	AJ_ArThaHiC20911103218006	CTTCCCAAAACCCCCAAACATAAACTTTTTTAAAATCATTTTTTCAAATAACTAATTAACTATCAAGTCTCCAATGTCTTCTTTATAAATAACTCAGAACTCTCTGCCTCAAAGACACAC	4	-	Chr3:4799294-4799413
Chr3:4824726-4824946	AJ_ArThaHiC20911103218125	AGAAATCAACTAACGCACCATCCTTTCAATGAACAACTACTAAGCTTTTAAGCTACCAAGTTGCAAACTTCAGATGCAACTTCGAAAGATAGGAAACGTTTCTTCAGCTGTGGAAGCGAC	1	-	Chr3:4824803-4824922
Chr3:4973960-4974191	AJ_ArThaHiC20911103218544	TCTCTCCATTTTTTCCGGAAATAATTACTTCTTTTAGGTAAGAAAATCTAGTCTCTTGCCTTTGTGAGATCTCTAACGGAATCATGGCGGCTGTCGATTCAACTGATCGGCGGGACTTCA	1	-	Chr3:4973976-4974095
Chr3:4974354-4974542	AJ_ArThaHiC20911103218550	CCATTATCATAGCATTCCTTTTCATCCGTACACCATTGTTACTTTTTAAAGGGCCATAGTAGAAAGAAGAAAAAAACATTTCCTATTATTGTTTTTTGTTGCTTTTAGCAATTAGCACAA	4	-	Chr3:4974387-4974506
Chr3:5134366-5134571	AJ_ArThaHiC20911103218736	TTATGGCGAAGGGTGGGTACTTGGTAGGTCCTTAATTACTTTTTATTATCATATATGTCTGCATGAATATATGCAGCTCCTGACCTTATTCAATATTCACTGCAAATTAGCCCAAAATAG	3	+	Chr3:5134415-5134534
Chr3:5287561-5287740	AJ_ArThaHiC20911103219049	TTTCGAATTAACTGTTACATCTGTTGCTTTTGTGTGGAGCTTATGAACAGTAAGCGATTATTTTCAGGTATTTGAGTCTCTGAAGTTTAGGTGGCTTGATTTTGTGGGTAAAGTTTCATA	3	+	Chr3:5287586-5287705
Chr3:5316781-5316984	AJ_ArThaHiC20911103219143	TCGTTCATATCGTTATCGTATCAGCTCAAAAATCTCAATCTCTCTTCCTTACATTCTTCTGTTTCTCGAATCCTTGTCTCCCTCCATGGCTTCCTGTAAGTTTCTCTACCTGTCTCTTGT	1	+	Chr3:5316818-5316937
Chr3:5316984-5317168	AJ_ArThaHiC20911103219150	ATGCTTTCGTAGTTTTCTGCTCTCATAGAATCATATTCATCGAAAGGTTGTAACTTTGGGGATTCTGTTTATTGAGTGATAGGAAAACTCAGAAAGGGACTTAACTTTGAACAATTAGGT	3	+	Chr3:5317009-5317128
Chr3:5317168-5317352	AJ_ArThaHiC20911103219160	CCAAGCTAATCTAATTGATGAGTTTGGCAGTGATAAGTTAATTTCATAATTTGTATCTCTTAATATGAATTACTCGACAACATTACTTAATCTTTCACTGTTGAGTATACGTGGAGATCG	4	+	Chr3:5317229-5317348
Chr3:5317352-5317547	AJ_ArThaHiC20911103219165	TTAAAACTTTCTGGAGCTATCTTGGATTGAGTGTATAAGATTTGCTTATGCTCAATTTTAAAAAGTGAGGGATCATATTGAAGATAAGTGCTTATTTAGTCTTTCTTTTTGACTCTGTCT	4	+	Chr3:5317389-5317508
Chr3:5317663-5317819	AJ_ArThaHiC20911103219170	AAGGCCAGTGAAGTACTTGAGTCTGAAGACAACATTTGGATCTGTGAAAGCTGTCCAAGTGTCTACTGTCCCAACTGCAGAAACATCAGGTACACTTATCTCTATATGTTTTCTTAACTT	1	+	Chr3:5317664-5317783
Chr3:5317906-5318153	AJ_ArThaHiC20911103219179	AAACGCTCAGCTTGTTCCCAAGCCTTCTGAGGTGGGTTTTGATTTTCCATTTAATGTTAGAATGTCAATTTAAGAACTCTGGTTCTTCTCCCTTATTGTCAAATGGAAGAGAAGAAATGT	3	+	Chr3:5317967-5318086
Chr3:5396177-5396340	AJ_ArThaHiC20911103219207	ACCTTCGGATAACGCGACTCTGACCTATCGGAAATAGTAAGATACTCGCTAAGATCTTGATCTTCATTGTGACATTGGTTTTTCTCTCGCGGCTTTTTATTTTCCATAACCGACCAACTT	1	-	Chr3:5396221-5396340
Chr3:5444854-5445034	AJ_ArThaHiC20911103219359	TTCGTCTTCTCCGTTCTCTCTATATTTCTCCTCACCTTCAACGCAGCTTTCTCGTTCTCGTCTCAGATCGTGTTACTAACAAACACCGTTTCTCCGGCGAAAAGCTCTCTGTTACTAAAA	1	-	Chr3:5444879-5444998
Chr3:5497877-5498046	AJ_ArThaHiC20911103219450	TTTAAGTGTAGAACATGTTTCTATGACATGTTTTTGGATATTGGACAGAAATGGGAATAGAAAAATCGATCTTTGTAACTCCCAAAACTTTCCATTTGACTGTGGTTATGTTAAAGTTAG	4	+	Chr3:5497902-5498021
Chr3:5562262-5562422	AJ_ArThaHiC20911103220229	TTGGTTACATTATATATGATAATCTTTTTGAAACTATTTGGTTACGTTTCTAATCGCAGGTAATAAATCGTAAGATTTATCAAACGCAAGCAAAAGAGATGGCCCAAAAGCTAGTTGCAC	4	+	Chr3:5562299-5562418
Chr3:5562969-5563190	AJ_ArThaHiC20911103220270	ACAACTATGTATATTGAAGGTTTTGTTTGTTAGCACCAAAAATACTAAACCACGGACGCGAAAGAAAAAAAAAGAGAGGGAAAAATTGGAATTTAGATAATTAATGACAGTTTTGCAATT	5	+	Chr3:5562994-5563113
Chr3:5571909-5572123	AJ_ArThaHiC20911103220417	AGCACAAGGAGGAAATGGCGGTAACCAATGGGATGATGGATCCGAATACGACGCTGTGACCAAGATTCAAGTCGCAGCAGGCGGGAACGGAATTGAATATGTTAAGTTCACATACGTCAA	1	+	Chr3:5571958-5572077
Chr3:5579416-5579614	AJ_ArThaHiC20911103220489	CGGACAACCCGAACAAGCTCCTCTTCGTGGTACCAAAGGCCGTGTTCTCCCAGCTGATCCGGTTCCTATATTTTCCTTGCCCATTAATCTTCTTCTTTCTATATGTATACTGTTATATTT	1	+	Chr3:5579496-5579615
Chr3:5777048-5777264	AJ_ArThaHiC20911103221105	ATTTTAGAGCGATCCAAACCGGTTTATTTATTATTAACCGGGAATTGAAATCACTAATAACCGTTACGATTATTCGGTTTAAAGGCGGGTACGGGGTTGCAACAGGCGGACCATTAGCTT	1	-	Chr3:5777097-5777216
Chr3:5902762-5902945	AJ_ArThaHiC20911103221278	AAAGCATATGTTCAAGGAGACAGCCAAATGATACTATCTAACCGTTATGAAGCTCTCATGGCTCTTTGTTGATGACAAGATTAACAGCTGTAAAAAGAGAAACCCTATAATGAGTAGTCT	3	-	Chr3:5902790-5902909
Chr3:6063135-6063328	AJ_ArThaHiC20911103221765	CTCTTAGCTGAGAAGAATGCAAAGACGGCTTGGGAAACTCCTATTCACGTTGATGCAGCAAGTGGAGGATTCATTGCTTCCATGGGTGAAGAGTATCAATGTCAGTGATCATAAGTATGG	1	+	Chr3:6063172-6063291
Chr3:6065025-6065258	AJ_ArThaHiC20911103221804	ATTCATTAATTGTTCATTATATAAGACAAATATTCATGTTCTTTTTTTTTTATCACTCATACTCATGCATGCATGTTCTTTTATTTACTTATGACTTTCATATACTCGAATGAATACCAG	6	+	Chr3:6065122-6065241
Chr3:6097677-6097836	AJ_ArThaHiC20911103221949	TTTATTTTTCATCCTCTGTTTTCTGATTTGTTTTTGAATGATACAGACACTACCAGGACCAGTGACTGATCCATCAAAGCTTCCCAAGTGGAACTACGACGGATCCAGCACCGGTCAGGC	1	+	Chr3:6097702-6097821
Chr3:6098006-6098177	AJ_ArThaHiC20911103221954	ACAGATTCAACTTGGATATAAATCAGATTATTGATTATTGTGAGATATGCAGGTGATGTGTGATGCTTACACACCAGCTGGTGATCCTATTCCAACCAACAAGAGGCACAACGCTGCTAA	1	+	Chr3:6098031-6098150
Chr3:6290112-6290300	AJ_ArThaHiC20911103222003	TGCACATAACCAGTTATCTTGAAATGAAAGATGGAAAGCCCTAGATTATATTGAGAGCCACTTGCCGTTTTCTTCAGTGATCAAAAATGACGTTGCCGGAGCTTCCAAAGGATTTAGTAG	1	-	Chr3:6290145-6290264
Chr3:6292146-6292312	AJ_ArThaHiC20911103222081	GGCTTCTTAATTAATCTATACGAAAAATCGCCTTTAAATTCCCTTGGAAACATAAGTATATATTGTGCATCGGTTTAATTTTAAAAAATTACCAAAAGAGGAAAGCTGAAAACCAAAACC	5	-	Chr3:6292147-6292266
Chr3:6355537-6355745	AJ_ArThaHiC20911103222133	TCTTCTCTCTGTCTTCCTATGAGAAAGCTTGTGCTCGACCTTAGACTGTTGGGTTTTACGCAGATGAGGATGGAGGAAGCGTTGAATCAATACGAGAAGGATATGCAGAAGAGACAAGAA	1	+	Chr3:6355622-6355741
Chr3:6355745-6355962	AJ_ArThaHiC20911103222139	AGCATGCCTTCAAAGTGTTCGATGAAATGCCCAACAGATGTTTGATGCTGTTTTGACTTTTTTTCTCTCATGTATTTTTCGGTTTGGTTTGGTCTGGCATTATGAAAATGTTTCATTTGT	3	+	Chr3:6355794-6355913
Chr3:6371695-6371932	AJ_ArThaHiC20911103222182	GTAGACATTTTGTTCATTGGGAAGCGAATTAGGAAAAAAGGCTTAAGATTTTTTAGCAATTTCTCGATCTTTGCTTATGTGGGTTTTGATTGTTCTTTGCTTCAGGATACGAGAGCTGTT	3	-	Chr3:6371741-6371860
Chr3:6393754-6393990	AJ_ArThaHiC20911103222308	ACACAAGCGCATAAGCGTGAGCTTCCTCGTGTCTCTCATGGTACTTTGTGCTAGACACGCAAGCAGAGTTTCCAAGAAGCTTAAACCCAAGAAGACTCGGAAGCAAACTCATCTTGAAGA	1	+	Chr3:6393815-6393934
Chr3:6421414-6421655	AJ_ArThaHiC20911103222762	AACAAAATCGTCTAATTGTGGCTTTGTGTGTGTTTAAGCAGAGAAGCAATATGCAAGAGGAGATTCCGGAGAAATAGCAAAGGAGGTGGCAGATCGGATATGGTGAAACCGTTTAATATC	1	-	Chr3:6421512-6421631
Chr3:6425737-6425918	AJ_ArThaHiC20911103222823	TTACTTATGCTGCCACTGGTGGAATTGTAAGAATTGCAGAGTGTTTGGTGAATAAGTGTCCTGGTTTGGTCAGTGTTCGGAATGCGAAAGAGCATATACCGATCGTGGTGGCTTCATTGT	1	-	Chr3:6425775-6425894
Chr3:6426174-6426359	AJ_ArThaHiC20911103222830	ATAAAAGAACAATTTTACACTTAAACAAACACATACCACCACGTTTCTTGCGGGAGAAGCAACCGACAAATGGATACCGAGAAAGGTTATCCCAGAGGTTTCAGAGCAGAGAGTCTACGA	1	-	Chr3:6426216-6426335
Chr3:6440802-6440953	AJ_ArThaHiC20911103222858	CCCACTTCCTCAAAACTGAAACAAACAAAAAATCCTCAACAATAGAAATGTATCCTACACGTCCACATTATTGGAGAAGAAGATTATCAATAAACCGGCCACAAGCTTTTCTTCTTTTGA	3	+	Chr3:6440815-6440934
Chr3:6441495-6441713	AJ_ArThaHiC20911103222879	TAATGGGTAAAAAATGGAAAATCATTGTCTATTTTAAAGTCCACAAAGAAAGACCAACAACTTCATTACCGTCTAGAGAACAAAGTGGGTCATCTTTATACTCGTTCAACCAATGAGATA	4	+	Chr3:6441544-6441663
Chr3:6445485-6445718	AJ_ArThaHiC20911103222968	GAGACTTGAGAGAGAGATCTAAAAATAAAAACAAAAACAAAACTCATTTCTCATCTAGAAGACGAAAACCCTATCTGATCACTCCAAAATGAGGACGCGCCGGCAAACATATCCGCCGAT	1	-	Chr3:6445515-6445634
Chr3:6484569-6484755	AJ_ArThaHiC20911103223113	TGTGGGTACTGAGTTTGTGCTTGACATTCAAGATCATGTTGGTTTTGTTATGCATTCGTTTTGACTCTTTTTTTTTTTTTGTTTCTCTCTGTTGTTACGTCCTGAAGCAGAAAATGTTTG	3	+	Chr3:6484606-6484725
Chr3:6525047-6525216	AJ_ArThaHiC20911103223202	AACTCTGTTTTAGACTCTTTTATTTGTTAGACTTTTTTGTTTGTTTCGTCGTTGTTGTTTTTTGACCAAACCACCATGCGATTCGTCGCGCCACCGCCTCGTTCCGGCGATAACTCACCG	1	-	Chr3:6525097-6525216
Chr3:6525704-6525870	AJ_ArThaHiC20911103223227	CTAGAAGCAGATATTTGAAGTGACTTGAAGTAAAAATGTGTTAAAACTAAGTTGAAATTTTATACTTCATTACATCACCAAAAAAGGATAAATTCTAGTTCAGTGGATGAGCAGCCAGTA	4	-	Chr3:6525727-6525846
Chr3:6545998-6546210	AJ_ArThaHiC20911103223389	AACTGATAGATCTTCCTTGGACAAAATCTACTTCCGATAATGTTGATTCCCTTCTGTCTGAATTCTCTCTAGTGTAAAAAATATTCTCTTGAATCCTTGGTTTTCCATAGCGTGTGTGTA	3	+	Chr3:6545999-6546118
Chr3:6546920-6547110	AJ_ArThaHiC20911103223417	AATGGAAATCTTTACTTGTTTGCTTCGGAGAAATCAAAACCCCATCTTGGCGTGTCCTTGCTCAGATTTGATTTCTCAACAGAGAAATCATCTCTATGTGTGACTCTTCCCTATCAGCGT	1	+	Chr3:6546957-6547076
Chr3:6554106-6554272	AJ_ArThaHiC20911103223444	GAGATCGAGAGTTTAGGCCCATTGGGCCTTATTAGAATTTCATTTTATTATCCTGAAAGTGATTTTTTTTTATCATGTGTATTGGTAGAGAGGTATGCCAAGAATATGCAAGAGAAGTTG	3	-	Chr3:6554129-6554248
Chr3:6554272-6554446	AJ_ArThaHiC20911103223449	AAATTTTCGATTTCTTCTTACAAGATTCCACGATCGTTCCGGCGTCACCGGAGCCGGAAGATACTGAGCTCCGAAAGCTCACGAACCAGTGGCCTCAAAACCCTTCTCATTTCAGGTGAC	1	+	Chr3:6554297-6554416
Chr3:6554591-6554786	AJ_ArThaHiC20911103223471	AGTCTTGTCATGATGAGTATCTTCGAGAGAAGAGAGGTCGATGGTCGGGATCTCGTCGGAGAAAATGAAATCACCGGAGTTTGTGAGGTGAGTGTTGGGTCTGTGTTCTGGAGCTTGGAT	1	+	Chr3:6554640-6554759
Chr3:6649471-6649689	AJ_ArThaHiC20911103223657	TCAATGTCGAAAACTTCGGTTTCACTTCTGCGGCTGATGAGATCTTCTTTGGTGGAGTTTTGTTGCCACTTGAGAAGACTACTCAGAGGAAAGTGACGACACTTAGAGATGAATTAAGTG	1	-	Chr3:6649522-6649641
Chr3:6813933-6814155	AJ_ArThaHiC20911103223885	GAGAAGCTTGAATTTGCTTATCCAGTTCCCATGATCAAAGGCATTAGACCAACACCTGGCCGAAGGGCTTGCACCGGTGATCCAATCGATCTAATCCCTAAAGAACGGATCGAAAAGTTC	1	-	Chr3:6813988-6814107
Chr3:6814559-6814761	AJ_ArThaHiC20911103223895	TTTTGGTTGAACTGACACAATTAACAAGAATGACCAAGAATAGTAAAAGAGAACTGTCAAAATAACGAAATGGCTAATAAACAGAGGACACAGAAGAATGATCTGTTGATTACTTGGCGG	3	-	Chr3:6814594-6814713
Chr3:6911580-6911814	AJ_ArThaHiC20911103224169	GCAGAGAGATTTGGCAAGTTTCTTCATCTACCGTTTCAGTTTGATATTGATTTCGGAGATACCGGAGGTCTATCTTGTGTTAAAGAAGAGAAACTCGCGGTGTTACTTAAACGCTATGAT	1	-	Chr3:6911611-6911730
Chr3:6912081-6912241	AJ_ArThaHiC20911103224189	CTTTGCTCAATGAGGTTCAATCTTCACGGAATCCTCAACGAAGACTTTGTTAGTATATCAATGTATCAAGTCGAAACATCTCAAGTCTTTTACTGCGCCGGCTTATTGTTATGTGTAACA	3	-	Chr3:6912098-6912217
Chr3:6920672-6920917	AJ_ArThaHiC20911103224354	GTTCGATTATCTGAAATTTTGCCTTATGAAGGAGCTCCTTCTCCGGTGTATGCAAAAGCTGTGGAGGCTTTGTCTGTGTCTTTGATGAGGTATAATGCGTCTGTGATCGAGATAGGGAGT	1	-	Chr3:6920702-6920821
Chr3:7007959-7008165	AJ_ArThaHiC20911103224468	CCAGAAAGGGGCTGATTGTTGTGAATTGTGATCGTCTGCTTTTCTTTTACTTGAGATTCTTGAATCTGATTTCTGATAGCGTTCGAGCGAGAGAGAGATTTTCATGTCTCGGAAGCTGAT	1	+	Chr3:7007996-7008115
Chr3:7016586-7016754	AJ_ArThaHiC20911103224620	AAGTCTTTACAAAAACTCTCCTCCAAGTATGGACCTTTCCTCCATCTCCGGATCTTTAGTGTTCCCATCATCCTTGTCTCATCTGCTTCAGTGGCATATGAGATCTTTAAGGCCCACGAT	1	+	Chr3:7016623-7016742
Chr3:7231637-7231857	AJ_ArThaHiC20911103225115	TATTTAATATGCTTTGATTTTACTAGAGAGAGATTCGGACCGCGTCTGCCTCTACCTCAACCCTTCATCGATGAATTTTTGGGGAGTCTATATGTGGTAAGAGAAGAGAAGCTTGCGGTG	1	-	Chr3:7231690-7231809
Chr3:7231857-7232023	AJ_ArThaHiC20911103225123	TTGTGGTTGCCACAAAATCTTAAGGGTTTTCGATAGTTACCCTAATAGACTTGAAATCTACAATTTGAGGTCTAATTCACGGATGGTTTCTAGTTTCCCTCTTAAATGGGATATAGCGTT	3	-	Chr3:7231880-7231999
Chr3:7232429-7232599	AJ_ArThaHiC20911103225152	AAGAGTTTATGAAAGTTGACCTAACATCTGCGCCAAATAGATCAATCCTTGTTCGAAATTTGAAACAGCGACGATGATGATGTCCGATCTTCCACATGATTTGGTGGAGGAGATTCTCTC	1	-	Chr3:7232432-7232551
Chr3:7238597-7238752	AJ_ArThaHiC20911103225236	TCTCTAGGGTTCCGTTTAAATACCTGAGAGCAATACGATCTACTTGCAAAAATTGGTACGATTTATCAAAAAATCGGAGCTTTGCGAATAAGAACATCGACAAAGCAGCGGTATCAGGGG	1	-	Chr3:7238633-7238752
Chr3:7364144-7364301	AJ_ArThaHiC20911103225734	CTTGAACGATTGGGCCGTGCGAAACTTGAGAAATCTGATTACGAGATTTGCAAGAATGTGTTCACGACACTCTCTGGGTCATTCGATGGTCTAGATTCAATGTTGGAGGAACTCATTGAT	1	+	Chr3:7364157-7364276
Chr3:7501502-7501674	AJ_ArThaHiC20911103225971	ATTTAGGAAAGATGATGATGAAGTTAGCCAAGAGAGAGATAACAAAAACATGTGGCTGTGTATGTAAAAGACCGAGTCACCCGAACATCTCCACCTTCACGCCATTCTCCTACCACTCGG	1	-	Chr3:7501531-7501650
Chr3:7501674-7501885	AJ_ArThaHiC20911103225977	TTTTAAAAATTCCACAACGAGACGTCGACCTTTCACGCGCTTCGGCACGTGGAAATCCATGGTCCTTTCCTATGGGTTTTGTCCTAAACCATCCTTCGGTCCGACCAAACCGCGTAAGGT	1	-	Chr3:7501742-7501861
Chr3:7542165-7542329	AJ_ArThaHiC20911103226427	ATACTAATAAGTGTCATCTGCGTTCGAAATAAGGGTTCAAGTTTTAAAAAGCTTTAGTGGATGGATCATAGCTTAGATATATATATAATTTTTTCTGAACAACGTTTGAGTAAATTACTA	5	+	Chr3:7542190-7542309
Chr3:7613838-7614002	AJ_ArThaHiC20911103226749	GACTAGGATCCAAAAATTCCGATTTCTGGGTGAAACGAGAAATTTATGGAGAAAAACTAGCTAAAAATATTGGCAATTTGGAAGTCCTTGGATTGCAAGGAACCCTAATTTTTTTCGTTT	3	-	Chr3:7613871-7613990
Chr3:7614002-7614184	AJ_ArThaHiC20911103226755	CAACGTTGTTTGACTTCACAGATAGAAACAACAAGACGAGTTTCATCGCTGAGCTCTTGAGAAAGGTAAAAACTTAAACTTTATCTCTATCTTTCACATTCATGTGAAGAATCACTCATT	3	-	Chr3:7614041-7614160
Chr3:7614184-7614411	AJ_ArThaHiC20911103226760	TCTTTTGCCAGGTGTCCTTCACCGTTTAATCCTCGGTTCGCTAAATTAGTTAATTAATTAATTAAATGGACTTGTAACACCCAAAACGTATGAATCAGCAGAAATCTCACTTCAGTTGAA	3	-	Chr3:7614292-7614411
Chr3:7648556-7648796	AJ_ArThaHiC20911103227109	TAAGTTTTAATTTAAGTTGTAAGATATAAGTGAGTAATTATCACCTAATTGTCTCCAATAATTAGTCTCTTTTTTTCCTTTCAAAAAATAAAATAATTTCCCCTTTGTGGTAGTTAGAGC	6	+	Chr3:7648629-7648748
Chr3:7667898-7668059	AJ_ArThaHiC20911103227677	GACGGCAGAGATAGGAAAGATTGTAGGTTGGGCTCCACAAAGCGCCATTCTAGCAAATCCTGCGATCGGAGGGTTCGTGTCGCATTGTGGATGGAACTCGACGCTAGAGAGTCTATGGTT	1	+	Chr3:7667923-7668042
Chr3:7676133-7676285	AJ_ArThaHiC20911103228087	CTAGTATTCATTCCCTCTCCGGCAATTAGTCATCTCATGGCGACGGTAGAGATGGCGGAGCAACTAGTTGATAAAAACGACAACCTCTCTATCACCGTAATCATCATATCTTTTAGTTCT	1	-	Chr3:7676154-7676273
Chr3:7678191-7678361	AJ_ArThaHiC20911103228172	AACACGGAAACAGTTACGTGCTTATTACCACTAGCGAGCGTTATCGCTTCGCAGATTCAGTCAAAAACAAGAAACAGGAGCTTGTCTTCTCCCCGAGATTAGAAGAAGGACTAACATGAA	1	-	Chr3:7678206-7678325
Chr3:7721140-7721353	AJ_ArThaHiC20911103228352	CAACTTCTGTATGCCTAGCGCGAAGAACCTGATCGGCAATTCAATCTCTCTTGAAGAAAGGTTGCATCTCCTCAACAATCTTACAAAGATAGCCGTCACGAAAATAGATAAAAACATAGA	1	+	Chr3:7721165-7721284
Chr3:7723737-7723950	AJ_ArThaHiC20911103228470	CAACTTCTGTATGCCTAGCGCGAAGAACCTGATCGGCAATTCAATCTCTCTTGAAGAAAGGTTGCATCTCCTCAACAATCTTACAAAGATAGCCGTCACGAAAATAGATAAAAACATAGA	1	+	Chr3:7723762-7723881
Chr3:7730278-7730432	AJ_ArThaHiC20911103228637	CCTTTTTTTTTTTTTTTGAAGTCTACTTTAGTTTCCTTGTTACTCACTATATGAGATCCCAACAAAAACTATTGATTAATTGTGACATATTTACATTGGTTGACATTTTAGGACTTCTAC	5	+	Chr3:7730291-7730410
Chr3:7734360-7734550	AJ_ArThaHiC20911103229008	AATGTCCCACGCTACTTTAAATTATATTTTTACATTTTCTGGTTGAAAACGATAATATATTCAATCTATATGTTGGTTAGATCAAGAGTCGAGTTTTTGGTTTACAAATAATAATTTTTA	6	+	Chr3:7734385-7734504
Chr3:7742256-7742477	AJ_ArThaHiC20911103229329	TCTTCCCAGAACGTTACCAATGACTATTTGAACCACCAATGCAACAACACCCAAGGGAGATACACGCATGGGAGTACGTTTGAGAAGAACCTCAACCAAGTTCTTCATAACATCTCTAAC	1	+	Chr3:7742329-7742448
Chr3:7742477-7742656	AJ_ArThaHiC20911103229338	AGTGCCGCGGTGACTCCTTTGGGTCCAAATGCCACTCCTGCCTCAGCACAGCCGTCTCTGGGGTAATTTCACTTCAATATTATATTAGAAGTCACATATTTCCATATAGAAATGTGCAAT	1	+	Chr3:7742537-7742656
Chr3:7742713-7742893	AJ_ArThaHiC20911103229341	AAGGCTAGTACAAAATAAATACATGTAAATTAGTCCATGCAATGATGTTCTTGACTGTGGATCTCTAATTAACAAATATATATGACAGCTTCGTGAGAGATGTCCAGGAAACAGAGGAGC	3	+	Chr3:7742738-7742857
Chr3:7745158-7745376	AJ_ArThaHiC20911103229388	GCGGCGACTCCTACGGGTCTAAGTGCAAATCCTGCATAAGCGCTGCCATCTCTGGGGTAATTGTCACTTCAATTTTATTAGTTAACCGTCATACATTTACATTTTAAAATTGCGAGCACA	1	+	Chr3:7745207-7745326
Chr3:7745376-7745556	AJ_ArThaHiC20911103229398	ATTGTGACCATAACTAAAAAAATGAAGATTAAACAATGCAATATTGTTCTTAACCGCGATGTCACATGTATGGATACGTATATGACAGCTTCGTAGGAGATGTCCAAAAAGCAAGGGGGC	3	+	Chr3:7745425-7745544
Chr3:7759201-7759441	AJ_ArThaHiC20911103230092	AGTGAGTACGAGAAAGAACTCAACACTCTCAGCCGTAGAGTTGCTACCCTTGACTTTACAGATGGTTTCACACACCGGTCCAATAGTAGAGATACCAAATCTGTCACCATCATATTCCAA	1	+	Chr3:7759262-7759381
Chr3:7793433-7793683	AJ_ArThaHiC20911103231234	CATTTCCTTTCTATTGAAGAAACTTGACCTAGTTTTAGTCTAGTTTTTAATCTGAATCAATTGTGTTTGTTGATCGTTGTGATGTCGAAAACCCTAGTTTTCGTGTTTTCGGAACTTGCC	3	-	Chr3:7793434-7793553
Chr3:7793788-7793975	AJ_ArThaHiC20911103231235	TGGCTTGTCGAACAGTTCACATCTCAGAGCTCATAAATTTTGTGGAGAGCAAAGTTCTCAGCAAAATCAAAGAAGAACCGAACGAGAGAGAGAAACGAATTCTTCTCAGGTATTCTCTTA	1	-	Chr3:7793856-7793975
Chr3:7868006-7868162	AJ_ArThaHiC20911103232114	TCCAAGCAATACCGGAGCTAGTCCGAACAGGCTTAGTTTCCCAAAAAGGTAGTTCGCATTATTTTGATACACCGGTTAATTCACATACTACGTAGTTGTTTTAATATGTTATTGTGATTA	3	+	Chr3:7868019-7868138
Chr3:7868221-7868439	AJ_ArThaHiC20911103232121	CATGGTAATTGGTTGTCCCCTCATGTTGCGGTTCAATATATATAGGTCTTTTAATTAGTCGGTCGACATAGGTTTTTAAACAGAACATTTGTAGTTGATAATTGCCGGATTATATGATTA	4	+	Chr3:7868270-7868389
Chr3:7899300-7899451	AJ_ArThaHiC20911103232210	TTGGCTACTTCTGGTAGCTGGTTGTTGATGTTAGATCATAGAACCGATTTTTATCTTTTGAATCTGTTTACTCGAGAGAGGATTTGTCTTCCGACTTTGGAAGCAATCGATGGATGGCAG	1	+	Chr3:7899313-7899432
Chr3:7902451-7902624	AJ_ArThaHiC20911103232294	TTGTAACCAATAAAGTTGGTACTGAAGAAGCTGCTTTGTTGTGGAGCAAATCCTTTATAGTGGATTTACCCATTGGCGGTCATTGTTCTGAGGTTTTCGCGAGTCTTTTAATCAACGAGG	1	+	Chr3:7902505-7902624
Chr3:7904145-7904330	AJ_ArThaHiC20911103232341	TGATCAAGGTAACAAAGGGGAGCAATTAATCGTTAGCTACTGGGGAGTGAAGCCGATGAAGATCACCAAAGAAGATGGAACTGAATGGAAATGGAGTTGCTTTAGGGTACATTACATCTT	1	+	Chr3:7904146-7904265
Chr3:7904652-7904865	AJ_ArThaHiC20911103232353	ATTCATGGAAGTCGCGAAACCTAATTGGTACGAACGAGCTCTTGTGATTGCCGTTCAAGGCATTTTCTTCAATGCTTATTTCCTTGGATACCTAATTTCTCCCAAATTTGCTCATCGTAT	1	+	Chr3:7904713-7904832
Chr3:8026973-8027191	AJ_ArThaHiC20911103232839	ACCCTAATTTTTATTTTGAGAGACCGAGTAGCCGATTTCTTTTTCCTTGGGAGATCCGATCACAAAGAGAAAATATGACGATGCCCGATCTTCCGCCAGATTTGGTCGAGGAAATACTTT	1	-	Chr3:8027024-8027143
Chr3:8032069-8032255	AJ_ArThaHiC20911103233019	TAGGGTTCCAGCCACATCTCTCAAACGATTACGATCTACTTGCAAACTATGGAACGCTTTATTTAAAAACCCGGGATTTACCAAGAAGCAATTTCTTAAAGCACCAAAGGAGTCACTGGT	1	-	Chr3:8032088-8032207
Chr3:8035413-8035580	AJ_ArThaHiC20911103233109	TATTAGAGACGTACACACTTTGTTTATACTCAAATCAATATGGGATCTTTCGTGAAAGAAGAAACGTCGTCGTTGATGACAGATTTTTTGGAGAAGTGCGGTGGTTATGCGGTGGTGGAT	1	-	Chr3:8035425-8035544
Chr3:8047771-8047977	AJ_ArThaHiC20911103233175	CTTACTCTCTTTTGATTTCACAAGAGAGACATTTGGACCACTTTTGCCTCTTCCGTTTCAGTTTGTTGAATCTGAAGATGCTTTGAGTGTATCCAATGTTAGAGACGAGCAGCTTGCTGT	1	-	Chr3:8047810-8047929
Chr3:8073435-8073623	AJ_ArThaHiC20911103233572	AAGAAATGAAGGAGAAAAAGTGAAAACCCCATTTTTTGTTTCTTTTGCCTATTTACTAGTAGTCATGAATTTACTCTGTCGTTAAACCAGGTGGAGGGCTTGGGCAGGGGAAGAAGGAGA	1	-	Chr3:8073456-8073575
Chr3:8073623-8073837	AJ_ArThaHiC20911103233576	TGCTTTCCTTCTCTTCTTCTCGTCGTCCTCCGCCGCCTCTCTTCAACGTCCCAGTAAGAACCCACTTCTTTAAACTCTTTTATCTACTATCATGTTTTATCTACATAGCATAGTTTGTTT	1	-	Chr3:8073706-8073825
Chr3:8079100-8079253	AJ_ArThaHiC20911103233672	TTGTCCGCCAGCTCAACACATATGTAAGTCCTAATCTCTATATATACTAATATATAACAAAACTTTATATATATATGTATATATATATGTTCGTATTTCTGTGTGATTCTCACTAATTTG	5	+	Chr3:8079113-8079232
Chr3:8079253-8079441	AJ_ArThaHiC20911103233677	CTATTGGGTAAAATATTTGATTTCTGTGGATTTTTCCCTATGGTGCAGTCAAAATTTTAATGTAGTTCTTGAGACTTGGCTTTTGGTTGGTGTTTTCGATACATCATCAGAGTGGTTAGT	3	+	Chr3:8079278-8079397
Chr3:8079441-8079670	AJ_ArThaHiC20911103233687	ATTTTACAACCCACTTGTGTGTCTTTTGGTTTAAAGAGATCTCTTGAAATGTTCTACATTGTACAAATGTTTTACATTGTTTGTTAGAGATCTCCAAAAAACTTTCTCTACAACATTGAT	5	+	Chr3:8079502-8079621
Chr3:8108171-8108368	AJ_ArThaHiC20911103233780	AGAGTTGCATGACTTTAGGAAACCCTAATTTGGTCTTTGACAAATTGAGTATATTTTTTTGGGTTATAAATATGAAAATCTTCTTATGATGAAGCTAGGAAAGAGGAGCTTTGTTTTTTT	5	+	Chr3:8108196-8108315
Chr3:8221162-8221316	AJ_ArThaHiC20911103234108	ATACTGTACGTTCTGAATTGTGAGGATTTGTTGTGATGTTTGAGAATGATGATGAATTAGAGCTTAAGTTCTTTGATCTATGCTTTGTTAGAAATGGCAATTTGATTTGTGTTTGGAAGA	4	+	Chr3:8221175-8221294
Chr3:8276800-8277027	AJ_ArThaHiC20911103234252	ACGTGCATCCACTATTTTCTCCGGAAAGAAGACCAAATCTGCAAATTCATCACCAAAGAATCAGAGATGGATGTTGTGCAAAGAAAAGTGAAAAAAATTGGAAGAAAAGTTGCTTCTTTC	3	+	Chr3:8276861-8276980
Chr3:8279333-8279485	AJ_ArThaHiC20911103234352	GCGTTCCTCGTGTCTGCTTGGAGAGAGTAAGCACTAATGAAATTGTTAGTTCTGAATGAAATATATTGTTGTCTCTTCATGCTAGCTATTGATTTTTATATTTCATGGTTTTTTTGTTTT	4	+	Chr3:8279334-8279453
Chr3:8280104-8280290	AJ_ArThaHiC20911103234375	TTTTACATATATATCAAAACTTCTTAATGGTTATGTTTTTGCAGATTGCGAGAATCGCCATCTCGAATCCTCTATTCACACCAAGCGATTTCAACACATTGTTCATAAGGTTTATTAAGG	4	+	Chr3:8280141-8280260
Chr3:8281574-8281811	AJ_ArThaHiC20911103234440	CAATCCCAAGAAAGTTGTTTTAGCATCTGTAACTCTTTTTATTACCTCTGGATTTAGTGTTTAGGATTTTGAAGCAATTTTGAGTGTGTTTGAGTCTTATGTTAGGTGCGTCAAGGATCT	3	+	Chr3:8281671-8281790
Chr3:8295910-8296070	AJ_ArThaHiC20911103234620	GTCGCTTTCGGAGATTAAATATACCTACGAGGATGGTTGTTCTCCGGTTGTGGCGTTGAAGAGGAAACACTCGATGAGACGGAGAATGACCAATAAGAAGACGAAAGATAGTGACTTTGA	1	+	Chr3:8295935-8296054
Chr3:8296070-8296256	AJ_ArThaHiC20911103234624	GTTGTCTTTGAGGATTTGGGAGAACAGTACCTTGAGGAGCTTTTGGGGTCTTCTGAAAATAGTGGGACTTGGTGAAAGATTAGGATTTGTATTAGGGACCTTAAGTTTGAAGTGGTTGAT	1	+	Chr3:8296083-8296202
Chr3:8455847-8456005	AJ_ArThaHiC20911103235196	AAGAATCAAGATTGTTTAAAATGATTTATTCGACATAAATGACTAGTAGATGATTTTAGGAGTTGTCTAAATTTTTATTAACGACATCTTCAAGAACATTTGGCCAACGGTATATATGTA	5	-	Chr3:8455862-8455981
Chr3:8456578-8456816	AJ_ArThaHiC20911103235235	CGATAAGTTAAGTCCAATGTTCAAAGTTTCCTGAGGTGGTAATCGGGTGGTCATGACTCATGAGCTGCCTGATTATAGTACATTGCAAATTTAATTGGTTGACTTTTTAAGTCATCATTT	3	-	Chr3:8456637-8456756
Chr3:8603276-8603473	AJ_ArThaHiC20911103235494	TCAAGTTTAACATTTTCGAGCCCCTTTAGAACAGTGGAGAAAGATCCACACAGATAAAAAAACGGGTGAGTTTTATATCAAATAGACGAAAATGCCCCTGTCGGCGACGGCGGATACAAG	1	+	Chr3:8603349-8603468
Chr3:8611950-8612134	AJ_ArThaHiC20911103235612	CGGAGGCGAGTTTGGAGGAGATTGTGAAATCGATCGGTGAAGCGAAAGATGAGAGGGTTGTGATCGATGAGATTGTTGATGATGTTTCGGATTTTATTGTTTACGGAGCGAATTTAACGT	1	+	Chr3:8612011-8612130
Chr3:8619589-8619802	AJ_ArThaHiC20911103235791	TCTCTTTCTTCTTCTTCTTGTTTTTTCTTTTGGGCTTTAAAGATTTGTCGATTTTTTTTCTCCTTTTGAATTCGATATGATTATATTTTCTCTGAATCTATTTGTTGGGAATTTTAATGT	5	+	Chr3:8619638-8619757
Chr3:8619802-8620028	AJ_ArThaHiC20911103235800	TGCTTATCTTTTCTCTATAGTTTATCAGAAAAATCAGATTTAATTGCCTTTTGATGTTCTTGTTCTGTTTTGTGTCTCCAGATGCAAGAATCTCTTTGAAGTAATTTGGAATCTTTCTCC	4	+	Chr3:8619851-8619970
Chr3:8620028-8620255	AJ_ArThaHiC20911103235808	TCAAATGTCACCTGATAACATAAATGGAGTCATTTTAGCAGTGTCTTCAAGTATCTTTATTGGTTCTAGCTTCATCATCAAGAAAAAAGGTCTCAAGAAAGCCGGTGCAAGCGGTGTCCG	1	+	Chr3:8620053-8620172
Chr3:8717203-8717371	AJ_ArThaHiC20911103235935	TGTTCAATAGAAACCTTCAACAACAACAAAAGCAATCGATGCCACAACAGCAGCAACATCAACTCTCTCCTTCCGGATTTGGAGCAACACCTTTTGATAAAATGAACTTCTCTGATGTGA	1	-	Chr3:8717228-8717347
Chr3:8725528-8725696	AJ_ArThaHiC20911103236159	AGATTCTATGACGATGATGATGACGGAGATGTGACCGGTATGAGCTCAAGTAGACGAAATCTCCAAACGATTCAGAGCTTCAAAGCTTCAGATCTGTTTCCTTGGATCGGTTAAAAAGAG	1	-	Chr3:8725553-8725672
Chr3:8755815-8756031	AJ_ArThaHiC20911103236331	TTCTGGTCTCACAAATCTCGGGATTGATTTTTTTCTTCTTCTACCCTTAAATCCCTCTGTATGTTTTTTTGTTGCACGCTCCCACATGCGTCTGATCTGGAATTAGATCACAAGAATCTC	1	-	Chr3:8755817-8755936
Chr3:8775331-8775522	AJ_ArThaHiC20911103236758	TTTTTTTTATGCTTTATCTCTCTCTACAACGCAATTGCTATGTGTGCATTTATTTCAACTCCTTTGGAATGTTTTTTTCTTTCTCAAATTAGAAATTCTTCTGCACTAGTCGTAACGTCT	4	+	Chr3:8775368-8775487
Chr3:8781212-8781381	AJ_ArThaHiC20911103236908	AACGAAACTGGAACAGCTGTTTCTATGGCAGAACAGTCTCGTTGGTGGTATCCCTGAAGAAATAGGAAACTGCAGCAATCTCAAAATGATAGATTTGTCTTTAAACCTCCTCTCTGGTTC	1	+	Chr3:8781237-8781356
Chr3:8787269-8787494	AJ_ArThaHiC20911103237036	AAAGTAATGATGCTTTCAGTTTGTGAGATTTAACCACACCAAAGCATGGCAATATTGACCATGTGAAATCAATAATAAAATATGGTTACATAGATTTAGGCATTTTAGATGCTTCTTACT	4	+	Chr3:8787318-8787437
Chr3:8794171-8794415	AJ_ArThaHiC20911103237215	GTTAAGTCTCTTCAACGTTTGATCGATAAATACAAGAATCTTTATCAACGGTTCGTAGACATTGCCTACGGTCATGGAGAAGATGAGGCTGGAACTAGGGTTAAAGTTGATGATAACCCC	1	-	Chr3:8794236-8794355
Chr3:8796329-8796556	AJ_ArThaHiC20911103237270	TGAGTTTGATAGTTACTTTGAGAATTTGGTGAAAGATCGTGTTGGGAACTATGTAGTTCAGCGTCTCATTTGGGGTTTTAAACGCACCGGTATTGATCTTCCGCACAGTCTCACCTCCGT	1	-	Chr3:8796425-8796544
Chr3:8798926-8799129	AJ_ArThaHiC20911103237331	AGATCGATGAAGACGACTTCGGGCCCATGGATATGCAGTTTGAAGTTGGAGGAATTTCACCCTTTCAAATGAAGCCCGAAGACAGCGATTTCTTCAACAAGTTCGAGGATGATTTTGATG	1	-	Chr3:8798950-8799069
Chr3:8976018-8976227	AJ_ArThaHiC20911103237895	AATGGTTCTTTCACCCGAGCTCTACCAGACACGATCGTTGATAGGTTACGCTGAGAAGTTCCTCTACGTATGCTTCTGCATGCCTACTGACGAAACCTTATGTTGGTGCATCCTCCTCCC	1	-	Chr3:8976072-8976191
Chr3:8981775-8981988	AJ_ArThaHiC20911103238012	GATCACATTGTCGAGTTTGTTCCTTCTCAACAAACAAGCAAAGATGGAGTTTGCACTGAGGTTTGAGTTTCCCAAAGAAAAGAAAATATCATTTTTGCGACCTCTTTAGAATAAGTTACA	3	-	Chr3:8981833-8981952
Chr3:8981988-8982153	AJ_ArThaHiC20911103238021	TTCTTCTTTCGCAAGTAAGTATGAGGGTTTTGGTTTCTAAATCTTGTGTTGGTGGTATGATGATTTGCAGCGTCTATATTCGGAGAACAAACAAAGCTACAACCGATGCCGCAAGATAGA	1	-	Chr3:8981998-8982117
Chr3:9053471-9053643	AJ_ArThaHiC20911103238297	GTTTTTTTAAGAAAAAAAGATAACAAGACCCGGTTTGGTGATCATTTAAATTAAAACAGATCTTGAACCGGGACAAAAACCACTAGACTGGAACACTCGTATTAAGATTGCTTTAGGAGC	3	+	Chr3:9053496-9053615
Chr3:9074102-9074329	AJ_ArThaHiC20911103238328	AAAGGAATGCGAGCCGTTGCAGCGGAGATTAGGGCGTTTGCTGAGAGAGTAATGGTAATGGAGAAGAAGAAGATTGAGTTTGCTAAAGAGACTGTGAGACTTCGTAAGGAAATGGAGATT	1	+	Chr3:9074175-9074294
Chr3:9136646-9136823	AJ_ArThaHiC20911103238381	TCTCCTTGTCCTGTCTTAGTCTTACTCTATGCTACTCTGGGCCTTCATCGTTACAATTTGCTTCAGGTCAGAAAATATATATGATTCATGTTCAATTGACAATAATGAATCACACATATT	3	+	Chr3:9136671-9136790
Chr3:9140836-9140988	AJ_ArThaHiC20911103238542	CAAAAGAAAAAAAGGGTTTTTGATTGCAAACTGAAAAAGTGAACGATCCATCCAAAAGTCAGAAGTTTACGAAGATGCAAATAGGTCAAGCCTTAGCCGCAGCAAAGGAAGGTGAGTCTC	1	-	Chr3:9140845-9140964
Chr3:9350059-9350258	AJ_ArThaHiC20911103239626	GAGAACAATTCTCCTTCTGAGGCTAACTCTGAAAGCGTTGACTATGTTTCAGATAATGTTGACTCAAGTAAGTTCTCATCTTGGTTAATTTGTGAGTTTGAAAGAATCTGTAAACTGTTG	3	+	Chr3:9350096-9350215
Chr3:9409101-9409303	AJ_ArThaHiC20911103240834	CTGCTATGTCTCTTGAATCCATCTCTATGACAACTCTCAACAATCTCTCTCGTAATCATCAATCTCACCGCAGTTCTCTTCTTGGTTTCTCAAGATCTTTCCAAAACCTTGGAATCTCAT	1	+	Chr3:9409174-9409293
Chr3:9409627-9409779	AJ_ArThaHiC20911103240839	GTTTTAATTATTCAGGTAAGATCCAAGAACTAAACGTGTATGAGCTCAACGAAGGAGATAGAAACAGTCCAGCAGTTCTTAAACTCGGCAAGAAACCAACAGAGCTTTGTCTCGGAGATC	1	+	Chr3:9409660-9409779
Chr3:9425410-9425633	AJ_ArThaHiC20911103241039	CCGTTGTACCCAATCGCCGTACTTATAGACGAGTTAAAAAACGATGATATTCAGCTAAGATTGAATTCCATCAGAAGGCTTTCTACGATCGCTCGTGCTCTTGGGGAAGAGAGGACTAGA	1	-	Chr3:9425442-9425561
Chr3:9425866-9426020	AJ_ArThaHiC20911103241045	CTCTATAAAATTGGTAAATTGCAAGAAATGAATCGCAAAAGTAAAGTCCTGACCGAAACAGCATAAACGTCGTGGGCCAAAAGGCCCGTTAAAGCCCATTTAAGAAGGGTATGGTTCCAA	1	-	Chr3:9425877-9425996
Chr3:9574357-9574526	AJ_ArThaHiC20911103241108	TTTAGGCATATCCGAGAGGAAGAATGTAACTTTCTGGTCAAGCAACTGTCGGAATCTGCGGTTGATCGCTCTCCGGTCGATTTGAGCAAATCCCTTTTCTGGCTAACCGCTAGTATCCTT	1	-	Chr3:9574383-9574502
Chr3:9596711-9596951	AJ_ArThaHiC20911103241172	TTCGTCGAGGTTGATACTTTGCTAAATCATGTAATTGATGGTCACTTGAAGAATCCTGAAGACAAAACAAATCAAGATCGCCCTGATATCATCGACTCGATCTTAGAGACTATTTATAAA	3	-	Chr3:9596784-9596903
Chr3:9597029-9597228	AJ_ArThaHiC20911103241182	AGAGAGGAAGAAAATGATTTGATGGTCAAGAAACTAAAGGAATCAGCTAAGAAGAAGAATACAGTGGATTTGAGCCAAACACTTTTCTATCTAGTTGGGAGTATCATATTCAGGGCTACC	3	-	Chr3:9597073-9597192
Chr3:9597228-9597409	AJ_ArThaHiC20911103241190	AAGTTCTCAAAGTACATGACCTTGAGTGTTGTACTAGACCTAAGACCAACGCCTCATCAAAATTCTCGCGTGATGGTAAAGACATCGCCTTTGCGCCATACGGGGAGGTTTCGAGAGAGT	1	-	Chr3:9597254-9597373
Chr3:9597409-9597600	AJ_ArThaHiC20911103241197	AAATTCAAAGACTCGAAACGAAATCTTCCTCCGAGCCCACCGAAGCTACCAATTATCGGAAACTTACACCAGCTTCGAGGATTGTTTCATAGATGTCTTCATGATCTCTCCAAGAAACAC	1	-	Chr3:9597445-9597564
Chr3:9598909-9599102	AJ_ArThaHiC20911103241247	GAGCACTCAGTAATTCTGATCTTTTCCCTGGTGGTTTGGGATGGTTTGTTGACTTTGTGTCGGGACATAATAAGAAACTTCACAAAGTCTTCGTCGAGGTTGATACTCTGCTGAATCATA	1	-	Chr3:9598947-9599066
Chr3:9599482-9599673	AJ_ArThaHiC20911103241253	ATAATCATAAAGAAAATCAAAGACTCGAACCGAAATCTTCCTCCGAGCCCACTGAAGCTACCGGTTATCGGAAACCTATACCAGCTTCGAGGATTGTTTCACAAATGTCTTCACGATCTC	1	-	Chr3:9599530-9599649
Chr3:9631195-9631372	AJ_ArThaHiC20911103241354	AAAGTTCAATCCTTCAAGTATATTAGAGAGGAAGAGAATGACTTGATGATCAAGAAACTGAAAGAATTGGCTTCGAAGCAATCTCCGGTGGATTTGAGCAAAATCCTCTTTGGTCTCACT	3	-	Chr3:9631229-9631348
Chr3:9640092-9640269	AJ_ArThaHiC20911103241580	TACAACTATCTAGACATTGCTTTTTCTCCTTATGATGATTATTGGAAAGAAGTAAGGAAGCTCGCTGTTCAAGAACTTTTCAGTAGTAAACAAGTTCACTCTATACAACCGATAAAGGAC	3	-	Chr3:9640126-9640245
Chr3:9641994-9642210	AJ_ArThaHiC20911103241668	TTCGTACAACTATCTGGACATTGCTTTCTCTCCTTATGATGATTATTGGAAAGAAGTTAGGAAGCTCTGTGTTCAAGAACTTTTCAGTACTAAACAAGTTCACTCGATTCAACCTATTAA	3	-	Chr3:9642031-9642150
Chr3:9645005-9645210	AJ_ArThaHiC20911103241756	GTGCTCAACAGTGACAGATTCGAGAAACTAATCCATGATACATATTTGTTTTTGGGGAGCTTTTCTGCCTCAGATTATTTTCCAAATGGCGGCTGGATCATCGACTGGCTCACAGGGCTA	1	-	Chr3:9645067-9645186
Chr3:9748566-9748745	AJ_ArThaHiC20911103242153	CCGCCGTGGAGTCTAGTGGTGATGACCTTCCTCTCCAACCTCTTTTTTCTTGTCCCTATGCACGTATCAGATCTCATAAGTTCAAAGTAGAGAAGAACTATGATGGTGTTAACTTTTTCA	1	-	Chr3:9748626-9748745
Chr3:9756491-9756661	AJ_ArThaHiC20911103242245	AAGGTAATGCAGAAGCTACTGGAGACTTTTCTGGAATGGCTCAAGCCTTTCACATTTCTTCCACAACAGCAAGGGCAATCTCTATAGTCATCGCCTTCTCTGCTCTCACCCTTCCAATCT	1	+	Chr3:9756516-9756635
Chr3:9758998-9759194	AJ_ArThaHiC20911103242322	GAGGAGGAATATTTCGATGTGGAGAAGGAGAGGAAGAGGAGAGCTAAGGAATTTCATGATACGAAGGAGCTTGAGAGGAAAGCAGAGGAGTTACAGTATAAGATTGATGAAGAAGGAGAC	1	+	Chr3:9759047-9759166
Chr3:9843318-9843493	AJ_ArThaHiC20911103242833	TCCCATGATAAAAAGCTTTAAGACATTTGCACCAAAAAGATCTCAAATTCACGTTCACATAGAAAAATTAACAAGAGGCAGAAGGAAAAAAAATGTGGAGGTCATTCGCAAGGTAAACAC	3	+	Chr3:9843343-9843462
Chr3:9845537-9845737	AJ_ArThaHiC20911103242928	TTTTTTAACTCGATGAGTCTTGATCTAATTTTTATGTATTGATCGTAACACGTTAGTCAACTTAACTAGATAGATTATATGTGTTTTTTCACTCTGGACTTGAATGAGTTATGGCATGGT	4	+	Chr3:9845586-9845705
Chr3:9867717-9867920	AJ_ArThaHiC20911103243050	CATCATCATTAGCTTCTTGATTTTTTTTTCCTTCTTTTTTTCGTTTCAAGAAACTAAACAAAGTTTCTATTTATGGTTTTCTGATTCTTCTTCTACAGATCTATTATTTGATTCTCCTTC	5	+	Chr3:9867754-9867873
Chr3:9881852-9882049	AJ_ArThaHiC20911103243200	TATATGGTGCCTTCACATTCCCGTCAGTGATCGTACTCCATTTAAAGGTGCCTTTATAACCCCCTTGTAAAGTACCAAAATGGCTATTTAACTGAGAAGATAGCTAATCCCGTTTAAACC	1	+	Chr3:9881889-9882008
Chr3:9882120-9882360	AJ_ArThaHiC20911103243206	TTGCAGCCAGGAATCCCAACGTTGATCTTGCTCTGATCTTGGTTAATCCAGGTACACAAGCTAGGTCTGCGGGATTCTTATTTTGTCGCAAAAGATAACAAAATATGTACATCTTTGTTC	1	+	Chr3:9882133-9882252
Chr3:10007207-10007361	AJ_ArThaHiC20911103243681	GAGGTGTAGCTAAAGTTTTATTTTCTGATCATTGTCCGTCTAGAGATGATGAACGGAAAAGAATTGAAACCACGGGAGGATATGTTGATATGTTTCACGTTGTGGAGAATCCAGGGATCC	1	-	Chr3:10007230-10007349
Chr3:10010938-10011164	AJ_ArThaHiC20911103243756	AAAAATATTCTGTTAAGGATTTCAATTACTTACAAATCAAATTTGTTAGACTTAATTAGTTCACTATTGAATCTTTTTTTCTTTCTGTTCCATGATTCCATCTAAAAAAAGGTTACGATC	6	-	Chr3:10010961-10011080
Chr3:10017432-10017656	AJ_ArThaHiC20911103243953	TCTCCCAAAGGCGAAGAAATGATCTCGCTATCGAATCAATGGCGGTCGAAGAAACTTCCTCAACCGCTTCTTCACTTTCCTCTGAGCTTGCTTCCGTGATTTGTCCCTCGCTTGCTTACT	1	+	Chr3:10017433-10017552
Chr3:10024443-10024631	AJ_ArThaHiC20911103244160	TTACCTTTTATTTTTAGTGTATGATGATTGATGGATGAGAGTGTCTTGTGGTGGAAACAGATATGTTACAGGTCTGATGGTGCTTGTTGGGGCGAATTTGGGACTGACGTTGGTGGCGTC	1	+	Chr3:10024444-10024563
Chr3:10024631-10024818	AJ_ArThaHiC20911103244173	GAGATTTGTAATGATTAGTATGTATGAATTTGAATTTTGACTCACGGTTTAGCGGGGTTTGATAGATTGTTGGAAGCATTGGAGCGGTTGCAGCTGGACTTGATCTAGGTAAAGAGGGTC	1	+	Chr3:10024698-10024817
Chr3:10174805-10175036	AJ_ArThaHiC20911103244226	GGTCTTTCATATTTTGATAGGTGCAGCTTTTGTCACAAGATTGGCAACGAAGACAGCAAGGGCTATCGCTGCCTTCGTTGCGGGTTGGTGATTCATACAAGATGTACCTTCATATTTGAC	1	-	Chr3:10174845-10174964
Chr3:10175036-10175217	AJ_ArThaHiC20911103244235	CTCATGATGGACATTGTCTTAAGCTTCTCACAACCGGAGCTCCTGATCACACCGATCCCAAATGTCATCTATGCGGTAAAAACACCAAACGCCTTCTTTATCATTGCTCTGATTGCAAAC	1	-	Chr3:10175050-10175169
Chr3:10184328-10184562	AJ_ArThaHiC20911103244338	CACCCCCATCCTCTACTATGTTTTGATTTTGGATCTAGAAATTGGTGCGACTTTTGTAACGAGAATTATGAAGGACAAGGTTACCTCTGCTATCGTTGCGGGTTGAGGATTCATGAGAAA	1	-	Chr3:10184383-10184502
Chr3:10184990-10185160	AJ_ArThaHiC20911103244347	TATGGCAGACAAAACCTGAGTGGGACAATCGATATTAGTGTTTAAACTAAACAAAGACCAGCCATGTGCCCACTAGTTGTACTGATATATATTTGTCAAAGTCATATATGATAATGTAAC	3	-	Chr3:10185005-10185124
Chr3:10230163-10230384	AJ_ArThaHiC20911103244535	CCATTAATGGAATTCTATTTCACCAACTTGCTCCAGCGAAATATTTTAGGGTTCCGGCAGTGGGAGGTCTGAGAGATTTCAGCAAGATGACATTTGAAAAGAAGAAAACATCGGAAGAAG	1	-	Chr3:10230217-10230336
Chr3:10230410-10230589	AJ_ArThaHiC20911103244543	TGAGCTAGTTGGACACATATCTTCAGTTAATGTTTTGACATCGTCCACACTGTTCTTGTTAAAGAACTATTTTGTCTTCTTCTTCTCCTCTTTAATCCCCTGATTCCCCAAACTTTAGGG	3	-	Chr3:10230446-10230565
Chr3:10323571-10323775	AJ_ArThaHiC20911103245155	AGTGAATCGAAAGAGCTAATAGAAGGGTTTCCGAAGAAGTTTAAAGAAGGCGTGACCAAAGATGAAGCAGAAGAAGACAAGACACAGCTCGAAGAAGCTGGTGCCAAGGTTTCCATTGTT	1	+	Chr3:10323608-10323727
Chr3:10323775-10323996	AJ_ArThaHiC20911103245163	AGAGACACATATAAGGTGCTTTTTTCATTTCTAGTGTTTGTCTTATTATAAAGTTTGTTGTAATTCTCACCACAAACTCTCTGTTTTTCTCGCAACCTCTGTTTTTGTTCTTGTTAAAAC	4	+	Chr3:10323812-10323931
Chr3:10353218-10353374	AJ_ArThaHiC20911103245432	TCTCCGTACAGTAAAGAGAATATCATCAGTACCATTGAGAAGGAGATGCAGAAAGATGAGGCTATACGATTGGGAGTTGAGCTCTCGCTCTTTGTGGCTGAAACAATGGTCTTATTATCT	1	-	Chr3:10353243-10353362
Chr3:10443261-10443436	AJ_ArThaHiC20911103245692	TTTGCATGAGTGTTACTGAAATTCTCAGTTTTTGTTTACCAAAATTTAGAGAATAAAAAGTATAGAAAGAGACATTTGGCTTAAAGTTGGTTCCAAAAGCTGCAACTTTACTGCAAAAAT	5	+	Chr3:10443262-10443381
Chr3:10446432-10446652	AJ_ArThaHiC20911103245830	AGTTTTTACTATCTATATTTGGCAGTGTGATTGGTGGAACGTTGATATCAATCGGTTTCAGTGTCCATAATTCATTATTTCATATAGCCAATGGCTTTAGCGCTTTAGCCAAATCCAGTG	3	+	Chr3:10446493-10446612
Chr3:10456435-10456623	AJ_ArThaHiC20911103245926	CACTCCTGCTCTTACCTTCATCCTCGCCATTATCTTCAGGTTTGATATCTATATTTTTTTTTCCAATTATTTGCAGATTTCAGATTGTTCTAAAAGCAAACTATTCTAGTTCAGGTGTCG	3	+	Chr3:10456496-10456615
Chr3:10465885-10466098	AJ_ArThaHiC20911103246219	AACGTATCTGATCACAGGATTCATAGGCATCGAATACAGCAACCCAACCTTAGCTTCAGCCATTAGCAATATCAATCCTGCCATTACCTTCATCCTTGCCATTATCTTCAGGTTTTATTT	1	+	Chr3:10465886-10466005
Chr3:10529305-10529462	AJ_ArThaHiC20911103246275	AATGGTTCTACTGTTTTAAAGTCTGCTAAAGCTCAAAAACGCCAGAAATCAGAAGACTCAGAAGATGAATTTTACAGACAAGTGAAACAGAAACAAGAAGCTAAAAAAGCTGCCAAAGCA	3	+	Chr3:10529318-10529437
Chr3:10541019-10541253	AJ_ArThaHiC20911103246858	TACAAAGTATGGTCTTACAGTACTGATGTTGGAATGATTTTGATCAGTGAAAACTGTATCTGCGTGAAGAACCGATCCTTGTACGTAGCTAATCCAGTTTCACAGGAATGCGTAGAGATC	1	-	Chr3:10541050-10541169
Chr3:10541496-10541648	AJ_ArThaHiC20911103246864	ACTTTTAAAGTTTTATCTTCTTTCTACATATTGCAAGTTTTCAATAATAATTTTACCTTTGTTTAGGGTAGCACTTGTATTGACCCGAGAACCCTAATCTAACACACACGCTTAGAAAAA	4	-	Chr3:10541505-10541624
Chr3:10598011-10598249	AJ_ArThaHiC20911103246976	AGTTTACATGTATACTTCAATCTTTGACTAATGTTTATTTTTTTATTTTGTGTAATTAACAGAATTCTGTAGCTTTGCTTTATGTGGCTTGTGGATCTTGGGTTGTTTGTTTCCTTGGTA	5	-	Chr3:10598022-10598141
Chr3:10598249-10598474	AJ_ArThaHiC20911103246982	CTCCTCTTGTTCTTCTCATCACCAGCAAGCTTATGAACAACATCGGTGGTTCCTCTTTCAACACTGATACCTTCATGCAAAGCATCTCCAAGGTTCTCTCTCTCTCTCTCTTTCTTCTCT	1	-	Chr3:10598307-10598426
Chr3:10598474-10598710	AJ_ArThaHiC20911103246992	AGAGAGAGAGAGTAACAAACTCTTGTCGTTTCGTTAAGGTCAAGGTGTCGTTTTGTTCTCTCTTTCTGTCTCTTTAAACACACACAAGAAAATGGGTAAAGAAGAGGAGAAAGAGAGTGG	1	-	Chr3:10598543-10598662
Chr3:10661592-10661800	AJ_ArThaHiC20911103247062	GATTCAGATAGTAAACGAGGCTAATAAGGTTAGTGGACATTGTCTTGGCATTGTTGTTTTGTTAGGCTTTGATGTCTGTTTACCGGGTGTCATTTTTGAAGGATCTCGTTATCGAGGCAC	1	-	Chr3:10661633-10661752
Chr3:10661851-10662057	AJ_ArThaHiC20911103247071	AATTGGTAGTTTGCAAGTAGTTTGCTAGGGTTGATGATTTGAGTGGTGCCATTGTAGGGAAACTATATAAGTTCATCTTCCCTAGTCTCAGGGGTCAAAGGGACTATGTTGACCATTGTA	1	-	Chr3:10661890-10662009
Chr3:10662544-10662716	AJ_ArThaHiC20911103247093	TGTAAATAATAATGTGTATGACGTGGCAGTTGTGAGTCATTGATTATCGAGAAGCCTCTTCTCTAGTCAGAGGGTCCAACGTGAAAAATAAATGTTCCCCTTAAATTAAATTAAATGCGA	3	-	Chr3:10662573-10662692
Chr3:10688760-10688916	AJ_ArThaHiC20911103247184	TATTATAGGAAGGTTGCTAAGCCGTGGAAGCGCGGTTATCTCTTGTTTGGACCTCCCGGGACAGGGAAATCGACGATGATATCCGCAATAGCGAATTTCTTGGAGTATGATGTGTATGAT	1	+	Chr3:10688773-10688892
Chr3:10688916-10689093	AJ_ArThaHiC20911103247189	TTGGACACAAAAGGGAAGTCTATTGTTGTAATTGAAGATATTGATTGTTCCCTTGAGCTTACGGAACATAGAAAGAAAAAGAAGGAAGAAGATGAGGATAAAGAGGAGAAGAAGGAAGCT	3	+	Chr3:10688941-10689060
Chr3:10695070-10695247	AJ_ArThaHiC20911103247283	GGGAAGTCTATTGTTGTGATTGAAGATATCGATTGTTCGCTTGATCTTACGGGACAGAGAAAGAAGAAGAAGGAGGAAGATGAGGATGAAGAGGAAGAAGAAAAGAAGAAAGAAGCTGAG	1	+	Chr3:10695107-10695226
Chr3:10941283-10941464	AJ_ArThaHiC20911103247910	TTTCTTTTTTTGTAAGCTTAACATAAACCCTAATATTTTCTTGATTTTTTTCAAGAAAATAAAAACATAAAGATGCTTGAAGTTAGATCAATGGATATGACTCCAAAATCACCAGAACCC	5	-	Chr3:10941285-10941404
Chr3:10989811-10990054	AJ_ArThaHiC20911103248143	ATCAAAGACTATTTTACAAAAATAAAACGAAATTCTAATAACTCTTTCCGGTGGAATTAAATTCTTGTTAGCCGACAAAAAAAAAAAAAAAATCTTGTTACGATTACAATTATCTTGATC	6	-	Chr3:10989851-10989970
Chr3:11008753-11008978	AJ_ArThaHiC20911103248219	GGAGCTTGTTTCGGTTTACGGTCCTCAAAACTGGAACCACATTGCAGAGAGTATGCAAGGAAGAACAGGTAACGACAAAAATTGAAATCTTTAATCTTCCCTTAGCTAATTCCGGAACAT	1	-	Chr3:11008859-11008978
Chr3:11008978-11009203	AJ_ArThaHiC20911103248234	TTTAGAGAAAACAATGCAGTGTCTGAAACAGTAGAAGAGTTCTGTAATAAAAGAAGGATGCAGAAGAAGAGTGATGATTTGAAGACTAAGAAGAAGAAGAAACAGAGTGTTTCTAGGGTT	3	-	Chr3:11009024-11009143
Chr3:11250156-11250359	AJ_ArThaHiC20911103248553	GGATTGATCCAATGATAAGAAGTAGTAAGAGATCATTGAGCAGAGATTTGGTGAGGTTTGTGCAATATGTTGATGATTGTGTTGTTAAAAGGTATGGTTTTGTTGTTAAGTCTGGTAGTG	3	+	Chr3:11250193-11250312
Chr3:11282538-11282720	AJ_ArThaHiC20911103248666	TGCTTCTCAAGCGATTATCAACACCGGAGAACTCGTTCGCCGGTTCTGTTCCAAACTTGATATAAGTCAAAGAGAGATAATGGCGATTCCAGAAGCGGTTGAGAAAGCAGAGAATTTCGA	1	-	Chr3:11282565-11282684
Chr3:11283304-11283469	AJ_ArThaHiC20911103248705	CTCGCATCCTCTATAAATACTCTGCTTTGGCCTTTGGGTAACAAATCAACAAATCAACTCTGAAAACAATTTACGAAGAAGAAAGAAACCCTAAAAATATGTTAATGGAAGAAGAGACCT	3	-	Chr3:11283305-11283424
Chr3:11528606-11528834	AJ_ArThaHiC20911103248981	GGACTTACTTCGGAAACTGTATGATTCCGGTGGGCTGTTATAACCGTAAGGCGGCGGAGTTTATGGAAGAGAAGGGATTTGTGACGGCGGCTGAGATTATTAGCGATTTGGTGAAAGGGT	1	+	Chr3:11528691-11528810
Chr3:11720262-11720493	AJ_ArThaHiC20911103249012	TACATACTCTCACTGCTGTGACACTTGGGAAACCAAGATCCTTGACCACCATTCAAGCTTTGAAACGATTGTTATGAAGGAAGACCTCAAGCGTAGACTCATCGACGATATTGACCTGTT	1	+	Chr3:11720323-11720442
Chr3:11745087-11745287	AJ_ArThaHiC20911103249103	GCGTTGGGTGAGACCTGAGGTTAGGAAAATTTTATTTTTATGAAGAATTGCAAACTTTCTATGATAAAACAGTTATCATAACTAAGGTGAGAAATAAATAAATTAATTTTATCTTAGTTT	5	+	Chr3:11745100-11745219
Chr3:11833498-11833739	AJ_ArThaHiC20911103249233	AAAGCATGGCCATTAATTGGAATTAGACAAGGTTTCTTAGACAAAGATAGCTATACCAATGCAAAGAAATTAAATTCCACCTCTGGCGGTGTCCTCGACCACACAGATCAGGAACTCGAG	1	-	Chr3:11833524-11833643
Chr3:11838411-11838605	AJ_ArThaHiC20911103249277	ACTTGAAGAAGACAAGCTTCTCGCAGAGTATGTTACTTCGCATGGTGAAGGAAGATGGAGCACTGTAGCTAAGTGTGCAGGTAACTATTTTGATTCAATCATGGCTTCTAAAAACACATA	1	+	Chr3:11838460-11838579
Chr3:11838605-11838852	AJ_ArThaHiC20911103249289	TTATAATAGTTATATATACATCTATATAATTAAATAACACATGCTTTTATGACGATTAATATAGATAAGTGTGAGATCATATAAGTGTATATGGGGTATAGTTGACCTGATTAAGCTCTT	6	+	Chr3:11838702-11838821
Chr3:11838979-11839157	AJ_ArThaHiC20911103249295	TTTTGGGAACATTTTTACATATATTATACCCTTTTTATTCGAGCATTTTCGTCGAGATAATGTTAAAATTTAAGAGATTCATACTCATATATTATATAGATAAAGATCATCAAGTTGCAT	6	+	Chr3:11839004-11839123
Chr3:11839157-11839311	AJ_ArThaHiC20911103249300	CCATTTCCTTTCATGGAATTTAAAAATTAGGGTTGAATAGAAGTGGTAAAAGCTGTAGACTAAGGTGGGTGAACTACTTGAGGCCAGGGCTTAAGAGAGGACAAATCACTCCTCAAGAAG	1	+	Chr3:11839170-11839289
Chr3:11909347-11909524	AJ_ArThaHiC20911103249369	GATTAATAGAGATGATCGCATCAAAAAATAATTGTGAGACATAACAGTTCCACAGATTATATATTATCCAAAAAATATGATGGAAGAATGTGCTAATTGGGCAAACATGATTACGAAATA	5	+	Chr3:11909372-11909491
Chr3:11909589-11909767	AJ_ArThaHiC20911103249376	TCTACATAAGTTTAAAGAGATATTTAATACAAAGTGTACAAAAAAACTTTAGAATTAACACCTGCAGGCTTAGGATCAAACAAGTAGATCTAATGCTCAAAGTTAGCTTACTTTGGCACT	4	+	Chr3:11909626-11909745
Chr3:11914520-11914690	AJ_ArThaHiC20911103249408	TACTACATGGCCTTTGCTACTCGTGAAGGCGACTTACTTTCCATGTGGTGGCATGGCCATAGGATTATGCATCACTCACAAAATCGCGGACGCAACCTCCATCTCAACTTTCATTCAGTC	1	+	Chr3:11914557-11914676
Chr3:11914743-11914923	AJ_ArThaHiC20911103249413	TTTAAGTTTCCGGTTGACGAAAATGCCAACAAGATAAGCCAAATAACGAAGAGATTCGTGTTCAGTGCGTCTAAGTTGGAAGAGCTCAGGACCAAAGCAGCTAGTGAAGACTTTGTAGGC	1	+	Chr3:11914768-11914887
Chr3:12591603-12591756	AJ_ArThaHiC20911103249667	TCATGGGTTATGATCCAAGAGTATATTACCGTGGACGTGGTGCTTTTGAGTCTATGGGTGCAGGTTTAGCTATGTCACCTGGTGATATAGCTTTCAAGGTTTGTGCGTTTTATTATTTTG	1	+	Chr3:12591604-12591723
Chr3:12591819-12592037	AJ_ArThaHiC20911103249673	CGAAGAAGAAGGTCCTATACTTTGTGCAGCTCTTGATGGGTTAAAGCTTCAATCTTTCCCTGAGTATGAAGTGAGAGTCAGGTTGCAAAATGTTTGTCTTAGTGTTTATGGCTTTGTGTG	1	+	Chr3:12591844-12591963
Chr3:12592037-12592276	AJ_ArThaHiC20911103249687	AACCTTTAGATGAATCAGAAGAAGCTACTCACACTGCTAAAGTTGTTAACGAATTATCAAGAGAGATATCGCGTATTCTTGTTTCTCACCCGGTTAACGCAGAGAGAGCTGCACAAGGCA	1	+	Chr3:12592110-12592229
Chr3:13034791-13034975	AJ_ArThaHiC20911103249896	CTCCCTCCATTTGGGGAGATTACTTCCTCTCAGTTTCGGTTGACGATTCCGTAAGTATTTGGATCAAAAGAAAAATGTTCAGGGACCCATTCACGAGCCTTGCGGCAGAGAACATGATTC	1	-	Chr3:13034820-13034939
Chr3:13061241-13061414	AJ_ArThaHiC20911103249981	AGTGTCTCTTTTTTGGGTCTTCTAGCTTTGTAGTGGCTCCTTATGGATATTACTGGAGGTTAATGAAGAAGCTCATGGTCACAAAGCTGTTCGGACCTCAGGCACTCGAGCGGTTACGAC	1	+	Chr3:13061266-13061385
Chr3:14198525-14198676	AJ_ArThaHiC20911103250325	CACCTTATGAGAAATCAAAGTTTTTGGGTTCCGGGGGGAGTATGGTCGCAAGGCTGAAACTTAAAGGAATTGACGGAAGGGCACCACCAGGAGTGGAGCCTGCGGCTTAATTTGACTCAA	1	+	Chr3:14198550-14198669
Chr3:14929982-14930172	AJ_ArThaHiC20911103250507	GTGTGTTTTGTGGTTTTAGGTATTGAATGTCTAGCTAATCAAGCTAGTGCCACTAGTGAGGAATGCACTGTTGCTTGGGGTAAGTCATTGAATACTGAACTCTTTTGAATCCAGATGTGG	1	-	Chr3:14930017-14930136
Chr3:14930172-14930410	AJ_ArThaHiC20911103250511	CGTCCAAGAACTCGAAACGATTTGAATTAAAGAAGTGGAGTGCTGTCGCTCTCTGGGCTTGGGGTACTTTATCACCAAACCCTAATTCTTCTTCTCACGTTTTATTCTTCTTCTTCTTAG	1	-	Chr3:14930291-14930410
Chr3:15354768-15354993	AJ_ArThaHiC20911103251034	TCATCACCGTTTTACGATGGATCTTTGCATGGATCCTCCGTTACCGCTCAAGATCCTCCTCATCATCATCATCTCAATCCTCCTCTTCTCCTTCTATTTCATCACAAACCATCAAAGAAA	1	-	Chr3:15354874-15354993
Chr3:15704212-15704429	AJ_ArThaHiC20911103251295	AAATGATACCACCATTTGTCTTTATCGCTATCTATTATTTTGTATTTATCGTTCTTTTTCCCGCTAAAAAATATTACAATTTTTTACACCTGAATGGGCCTCATAGATCCCATCCCGCAA	4	-	Chr3:15704214-15704333
Chr3:15838965-15839215	AJ_ArThaHiC20911103251305	ACCTCTCTTCTCTCAAAGAGGTGGAGGACTCTGTATTCTCTCGTGCATAATCTTGACTTGGACGATTACATCTTTTGGCACCATGAAGACGGTTACAATCAGTACTTTAGTAACGACATT	1	+	Chr3:15839062-15839181
Chr3:16006742-16006984	AJ_ArThaHiC20911103251555	TCCAACGTGGTGCCGATCTATCTCGTTCTGTACTTATACTTCCTCTTCGTGAGCTTGACATTGCTTTTGTTCAAGGTTTGGATTTTGTGGATTAGCTTAAATCGGACTTTGATTTGGATT	1	+	Chr3:16006767-16006886
Chr3:16236998-16237222	AJ_ArThaHiC20911103252103	ATGGTGATGTATCTGGTCGGAAGAAATTGATTGATATGATGGTTCTTGATTGTTGTTTCATTCTGATTTTGTTCCTGGTGGTAGCTAGAAAAGTCAGCTACCCTGAGCGTGTGAAGGATC	1	-	Chr3:16237019-16237138
Chr3:16237222-16237448	AJ_ArThaHiC20911103252110	TGGAGAAAAGTGTTGCATCTTTAGAATCCATCAGAGACTCCGGAACAACAACTACAAGGACGCTTACGAACCAAGGGTTCTCTCAATCGGTCCATACCATCATGGAAAAGAACATCTCCA	1	-	Chr3:16237281-16237400
Chr3:16252655-16252854	AJ_ArThaHiC20911103252164	GCTTCATCCTGATGATATTTCTGGTGGTAGCTGGAGTAGTCAGCCACTCTGAGATTGAGAATGATCCTATTTTTGCAATCCCATGGATTCTACCGGCTATAAGGAATGACCTAATACTTT	1	-	Chr3:16252699-16252818
Chr3:16252957-16253123	AJ_ArThaHiC20911103252171	ATCTCTCATAAACCCGAAAACAAGAAGTACAAGGCCGCTTATGAACCTAGAGTTGTATCACTCGGCCCATACCATCACGGAAAAAAGAATCTACAGATGATTGAAGAGCACAAACTTAGA	1	-	Chr3:16252980-16253099
Chr3:16271912-16272097	AJ_ArThaHiC20911103252326	TTCCCGGAGCTTACTCGGAAGCAGCTGCCGGAAAAGCTTATCCCAATTGCGACGCCATTCCTTGTGACCAGTTTGACGTTGCTTTTCAGGCGGTGGAGCTTTGGATCGCTGATCGAGCTG	1	+	Chr3:16271949-16272068
Chr3:16272097-16272255	AJ_ArThaHiC20911103252331	AACTATGATCTTCTTCTCCGTCACCGTCTTCACATCGTTGGAGAAGTTCAGATTCCGGTCCACCATTGCCTCCTCGCACTCCCGGGAGTCCGAACTGACTGTGTTTCGCGGGTGATCTCT	1	+	Chr3:16272110-16272229
Chr3:16305754-16305908	AJ_ArThaHiC20911103252477	ACCTGTTTGGATTCTTCTGGGGAATTTTATGGCTACTAGTTTCTCCTCCGAGTATTCTTTTGGTTATTCGATTCGCCAAGTCCATTACCTTTTGAGAATCTCAAGATTAGATTCCTTGGA	2	+	Chr3:16305779-16305898
Chr3:16321730-16321896	AJ_ArThaHiC20911103252665	GATGAAACAAAGAAGGCGGACTGGGGACCTTTTAATGGTCCGATGAAAGATCAGGGAGAACACGGTAGAGTTTCAAATTCTAGGTTGTTTTACTTATGAACTGGTTCTTGTTTTTCCTAA	1	-	Chr3:16321765-16321884
Chr3:16322562-16322768	AJ_ArThaHiC20911103252702	TGCTCTTAAATATAATGTTTCTTGTTTCTTGCACTCCACGCTTTTTGCTTCTCAATGTCTTCAATGTTTAGTGTTGATCGTTTCAATCTCTGTTTACAAAGGTTCAATCGATGAGATCCT	3	-	Chr3:16322562-16322681
Chr3:16379708-16379892	AJ_ArThaHiC20911103253103	CATAGCTGATTTTGGTTGTTCCTCTGGACCGAACACTTTCACCGCGGTACAAACCTTAATTGATGCTGTGGAAAACAAGTATAAGAAAGAAAGTAATATTGAGGGAATCGAGTTCCAAGT	1	+	Chr3:16379745-16379864
Chr3:16393494-16393709	AJ_ArThaHiC20911103253154	CCTTATCAATGACATCTTCGCGTCTACTGTCAGCATTTTCGCCTATCTTGTGGGAACGTACAAGAACATCTCTCCCATGACAGCATATCGTGACCTTATAGCGGTGATCATTTTGATTCT	1	-	Chr3:16393494-16393613
Chr3:16408910-16409066	AJ_ArThaHiC20911103253207	ATAACACCATGATCTCGGTGTATGGAAAACACTTTGCTGAGAATGCACACCAGTTGTTTCTGGAGATGGTCAACAACAGAATTCGTCTCAGCGGTCACACCTTCAAGTATCATCTAGAAG	1	+	Chr3:16408923-16409042
Chr3:16409136-16409374	AJ_ArThaHiC20911103253212	TGAAAAATGAGATCAGTTAGAAAACGTTGACATAATTCTTTTCCCAAATTTTTATGGTAATTATTTTCTTTTAGAGAGTAAGGTGAGAGTTCTGTTTTTTTCCTTATTATATATGTTTTT	6	+	Chr3:16409161-16409280
Chr3:16409374-16409559	AJ_ArThaHiC20911103253224	CTAATTTTTTTATTTGATCTCATCTTCCAAGTTTTTAAAAATATTTGAGCAATTGATGTCAAAATGGATAGAAAACAGAGAAATAAGCTAAGAATATTGTATAATTTTATTATAATATAT	6	+	Chr3:16409411-16409530
Chr3:16479387-16479562	AJ_ArThaHiC20911103253905	TATTGAAAACGTTTGCAAAAACCTACAAAGAGACTACATCTAAAATGTACAAGAGACTTTACATATTGATTGTTTTCTACCAATAAATTTCGTAATACTATTTCACCAAAAAAAAAATTA	6	-	Chr3:16479419-16479538
Chr3:16517135-16517350	AJ_ArThaHiC20911103253934	TTATCGGAAGGAGACGAAGAGAGCGTGAATCAACATGTTGGAAGACAGTTTTGGGAATATGATAACCAATTTGGAACCTCTGAAGAGAGACATCACATTAACCATCTTCGTAGCAACTTT	1	-	Chr3:16517183-16517302
Chr3:16517350-16517547	AJ_ArThaHiC20911103253942	TTAAATAATAAATCCATAATTTCTTGCATGCTTCATTGCTTTCAACGTGAACAAGATTTTTCACGGCATTGGTGAGTCCATTACGTCTCTTGAACACATATAGATTTGCCTTCTTGAGCT	3	-	Chr3:16517392-16517511
Chr3:16525531-16525746	AJ_ArThaHiC20911103254015	TATCCGCGGCAGATCATTGCTCGTCGAGCTTATTAGCGCCAAGACTGACCAGCGTGAGTACACCTTTTTTTTCCTTTAACGATTTTTTCAATGAAATTTAAAATAAATAGATACAAACAT	3	+	Chr3:16525532-16525651
Chr3:16525746-16525905	AJ_ArThaHiC20911103254026	GTTAGTACATAAATTTATCAAACATTAGCTTATGAAATAAAAGAAGCTAGCTAGCACATCAAGAGTCTGTATATAAATTTATGAAATGATATAAAAGTAGGTTAAGGCTATCAATAATGT	6	+	Chr3:16525771-16525890
Chr3:16598318-16598531	AJ_ArThaHiC20911103254379	CTCTCTCTGTCTTCTTGCTAGCTCTCAGAATTTTACTTGATTTAGTAGAGAACTGTATTGACGAATTAAAGAGTTTTTCTGTATATCTCTCTGTCCACCTGTTTTGTCTTCTTACTTAGA	3	-	Chr3:16598388-16598507
Chr3:16649379-16649561	AJ_ArThaHiC20911103254606	TGCCTTCTTCAACCGACCATTCGATTTCGGTTCAGCTTCATCTCAGTCTCTCTCCTTCTTTACTCAATTCGTTTGCGCTCTTGTCCCTAAGCCAGGATTTTATGGTGGTCACGGGATTGC	1	-	Chr3:16649442-16649561
Chr3:16649935-16650089	AJ_ArThaHiC20911103254636	CACCTTCGTCTCCAAAGTTGTATAGCTGTTTTAGAGCTAAACGATATTGAAAAAGATGCAGAGTCTATCTTTTCAAGGTTGTCTTAAACCAATAATGGTAATTGGTAAACGCTTTGAGGG	3	-	Chr3:16649958-16650077
Chr3:16652042-16652226	AJ_ArThaHiC20911103254692	AGTGTATGGCCTGATATTCAGAAGTATATACCACCTTATCCTGGAGGTTTGAATTTGCAGCATAGTATCGAGTATTGGCTTACGTTGGATTTGCTTGCATCGGAGTATGAGAATGCACCG	1	+	Chr3:16652079-16652198
Chr3:16776876-16777072	AJ_ArThaHiC20911103254955	ATGACAAACCAATGGGAAGTCCCTTCACAAATCTGATCCGCGTTGTAGTCGCTGCTACAAGAAAAAGGAAAGCTGTGATTTCATCTAGAGAAGAAGACTATCACCATGGGCTTGGAAGAG	1	+	Chr3:16776913-16777032
Chr3:16778637-16778823	AJ_ArThaHiC20911103255022	ACTCAAAACATAAACAGATGTTGATGATTGTAAAGTTTTTATGTGGTGCAGTTACATTGTTAGGCATGTCGATAACTTATTTTGGATGGGTAATGAACTTGATCGTCTTCTTGATCGAGG	3	+	Chr3:16778674-16778793
Chr3:16778823-16778977	AJ_ArThaHiC20911103255028	TGTCAACATGTTGCCTGTTGTCGCAGCCATCCTAGCCGATTCCTTTTTTGGGAACATTCCTGTCATCTCAGCCTCCGCTTTCATTTCTCTAACTGTAAGTTTTAACACTCACCAATTCTT	1	+	Chr3:16778848-16778967
Chr3:16783320-16783516	AJ_ArThaHiC20911103255128	TGACAAACCCTTGGGAAGTCCTTATACAAGCCTGATCCGTGTTTTAGTTGCTGCTACAATGAAAAGAAAGGCAGTGATTTCATCAAAAGACGAAGACTATCATCAATATGGTCTCGGGAA	1	+	Chr3:16783357-16783476
Chr3:16840083-16840289	AJ_ArThaHiC20911103255492	GTCCGGATCTTGTATATTTTCTCGTCTTTGTACGAGACAAAGAAATTCCGATTTCTAATCGGATATTTTGTCTACCGGTTATCACCGGTCTTTTCTTTCGCATCTAGCGGGATCGATCTC	1	-	Chr3:16840134-16840253
Chr3:16945516-16945754	AJ_ArThaHiC20911103255566	ATTGATACTTAAAAGTTTCCATCTATATCTATGTAGGTGGTCGAAAATAGCCCGAAAATTGCCGGGACGAACGGATAACGAGATAAAGAACTACTGGAGGACTCATATGAGGAAGAAAGC	1	+	Chr3:16945613-16945732
Chr3:16946157-16946322	AJ_ArThaHiC20911103255590	ATTTAATTCATTGAGATAAATCTGTTTTATATATATGTTATATAACTTATAAATACAATAAAACCTAACGACTGTAATAGTTGGTTGATGAACACAAAAACAGCTTAAGTCTGGACTCTG	6	+	Chr3:16946182-16946301
Chr3:16968583-16968803	AJ_ArThaHiC20911103255657	AGTGAATTCATTATCGACTTGGAAGATTGAACATGTATCATCAAGAGTTGTATCTGTAATCATATCAGTTGACAGTTTGAATGGTCTTATTGAACTAAGGGGTGTTAACAAAGCCAAAGC	3	+	Chr3:16968683-16968802
Chr3:17036914-17037077	AJ_ArThaHiC20911103255885	TTTTATCTCTATATACATAATTATAAACGTTCATATATCGTTTGATATAAATTAAGAAAAACAGTTTCTTTAAAGTTTTGTTTTTGATATAATATTTTTTTTTTCTAATAGATATTTTCT	7	+	Chr3:17036927-17037046
Chr3:17042765-17042919	AJ_ArThaHiC20911103255956	ACAGTTCGCCTGATTTTTCCGGTGAGCTCTTGAATTTGGTGCTTGTTGACGGTGCTGTTTCAGGATCCTTCTCCGGTGAGCTTGGCTACAGATCTGTCCTCGTGCGGCGTGTCTCTCTTC	1	-	Chr3:17042788-17042907
[truncated: 20,557 more rows]
